# Supplementary material for: Dynamic Changes of Urine Proteome in Rat Models Inoculated with Two Different Hepatoma Cell Lines
Source: Hindawi journal article supplement (doi:10.1155/2021/8895330), 2021-01-07
Supplement: f1 [file 8895330.f1.zip]

Title: Dynamic changes of urine proteome in rat models inoculated with two different hepatoma cell lines. Full author:  
Yameng Zhang, Yufei Gao, Jing Wei & Youhe Gao\*.

Table S6 In RH-35 model, the occurrence of the protein in 12155 random allocations.

| Day 5       |           | Day 7      |           | Day 14      |           | Day 28     |           |
|-------------|-----------|------------|-----------|-------------|-----------|------------|-----------|
| Protein ID  | Occurance | Protein ID | Occurance | Protein ID  | Occurance | Protein ID | Occurance |
| P10715      | 736       | P34901     | 758       | Q8CJD3      | 763       | P97605     | 814       |
| Q6AYS4      | 717       | P00731     | 756       | P02631      | 699       | P34901     | 733       |
| P02091      | 715       | P19629     | 753       | Q54728      | 686       | Q6AYS4     | 729       |
| P02631      | 702       | P13432     | 718       | Q6IRE4      | 686       | Q6IE51     | 711       |
| P01835      | 702       | P02631     | 710       | Q4FZU6      | 677       | P08010     | 691       |
| Q6IRE4      | 695       | Q6IRE4     | 705       | P01835      | 668       | P02631     | 690       |
| P12020      | 691       | P18418     | 695       | P97840      | 667       | P10715     | 687       |
| P18418      | 687       | P12785     | 694       | P97605      | 663       | Q01205     | 685       |
| P19629      | 685       | P01946     | 684       | Q9WTT6      | 655       | P51907     | 678       |
| P06760      | 683       | P10715     | 683       | Q63942      | 648       | P36374     | 675       |
| P20766      | 677       | P02091     | 665       | Q9QZQ5      | 645       | Q6AYL6     | 673       |
| P20762      | 674       | P00774     | 656       | Q6IE51      | 642       | Q6IRE4     | 673       |
| P01836      | 669       | P22006     | 645       | P01681      | 638       | Q63467     | 653       |
| Q80WL1      | 668       | Q9QW07     | 643       | P52590      | 636       | P52590     | 647       |
| P08723      | 664       | P01836     | 641       | P01836      | 625       | P60905     | 647       |
| P83748      | 662       | P97840     | 639       | P25236      | 621       | P97840     | 638       |
| P13432      | 652       | Q80WL1     | 638       | Q7TP52      | 611       | Q80WL1     | 637       |
| Q5GRG2      | 641       | Q9WTT6     | 637       | P02625      | 611       | P01681     | 630       |
| P06911      | 641       | P52590     | 636       | P47967      | 606       | P01836     | 625       |
| P97840      | 627       | Q54728     | 635       | P04182      | 605       | P50115     | 625       |
| P34901      | 626       | P01681     | 631       | P20766      | 595       | P06760     | 624       |
| Q8CJ52      | 626       | P20766     | 627       | P16086      | 594       | P01835     | 622       |
| P47727      | 620       | P20760     | 626       | P06911      | 594       | Q35547     | 617       |
| Q9JHB9      | 619       | P12020     | 618       | Q99041      | 590       | P50116     | 617       |
| P52590      | 618       | P01835     | 615       | Q80WL1      | 580       | Q7TPB1     | 616       |
| P19223      | 618       | Q99MH3     | 615       | P14480      | 575       | P19629     | 613       |
| P20761      | 616       | P15399     | 608       | P06760      | 570       | P13432     | 610       |
| P01681      | 613       | P83748     | 608       | Q63617      | 567       | P00714     | 606       |
| P02782      | 612       | Q4FZU6     | 606       | P02803      | 566       | P08753     | 602       |
| Q54728      | 603       | Q6P6Q2     | 595       | Q09030      | 561       | Q54728     | 598       |
| Q99041      | 601       | P83121     | 595       | P55314      | 546       | Q99041     | 594       |
| P14668      | 601       | P16086     | 579       | G3V686      | 531       | Q9QZQ5     | 593       |
| Q62635      | 601       | P00714     | 575       | Q5HZV9      | 525       | P83748     | 588       |
| P22282      | 599       | P20762     | 571       | Q5GRG2      | 525       | Q09030     | 585       |
| Q9QZK9      | 597       | P31430     | 562       | P08723      | 515       | P16086     | 580       |
| P16086      | 596       | P35467     | 562       | Q62997      | 503       | P01946     | 577       |
| Q9Z0V6      | 592       | P02803     | 559       | P00714      | 502       | Q62635     | 569       |
| P02803      | 586       | P98089     | 556       | P83748      | 501       | Q7TP52     | 563       |
| P22283      | 581       | P06760     | 555       | Q6AYS4      | 501       | P12020     | 557       |
| P30120      | 580       | P25031     | 548       | P08753      | 493       | Q63617     | 555       |
| P31044      | 579       | P06911     | 546       | P10715      | 477       | P20762     | 550       |
| P16636      | 577       | P20761     | 536       | Q561R9      | 472       | P85971     | 544       |
| Q99MH3      | 573       | P25236     | 536       | P51907      | 460       | BOBNN3     | 534       |
| Q9JI85      | 570       | Q63532     | 532       | P12020      | 459       | P83121     | 529       |
| P35280      | 566       | Q99041     | 530       | Q9QW07      | 453       | P20766     | 526       |
| P36374      | 564       | Q63617     | 517       | P00507      | 452       | P55314     | 521       |
| P25236      | 561       | P82995     | 514       | P02793;Q7TI | 444       | G3V686     | 515       |
| P50115      | 557       | Q6AYS4     | 506       | Q9JHB9      | 438       | Q5GRG2     | 515       |
| P14669      | 551       | Q63942     | 497       | P05539      | 431       | P02091     | 512       |
| D3ZHA0      | 546       | P55091     | 496       | Q9QUL6      | 427       | P25236     | 509       |
| P51907      | 545       | Q4FZU2     | 495       | P02781      | 424       | P07171     | 507       |
| Q6IG02      | 537       | Q5GRG2     | 494       | Q30KJ2      | 423       | P11598     | 505       |
| P07647      | 530       | P05539     | 488       | Q63532      | 416       | Q9QUL6     | 502       |
| Q5FVI6      | 527       | P35280     | 474       | P01946      | 413       | P05539     | 492       |
| P20760      | 526       | Q6IG02     | 473       | P83121      | 399       | P98089     | 470       |
| Q9QUL6      | 519       | Q91ZS3     | 463       | P02782      | 398       | P00774     | 454       |
| P08937      | 511       | P47967     | 462       | P07171      | 383       | P27213     | 450       |
| P0C0A9      | 510       | Q30KJ2     | 457       | P82471      | 376       | Q63942     | 437       |
| P06761      | 504       | Q03191     | 438       | P15399      | 374       | Q8CIZ5     | 435       |
| Q4G075      | 500       | P97580     | 435       | Q35547      | 366       | Q4FZU6     | 433       |
| P55314      | 498       | Q6P6R2     | 434       | A2RUV9      | 362       | Q6IFV1     | 429       |
| P01946      | 496       | Q7TPB1     | 389       | P0C0A9      | 343       | Q812E4     | 422       |
| P09605;P258 | 494       | Q5FVI6     | 378       | Q6AYR9      | 342       | P02625     | 421       |

|             |                  |                 |            |     |
|-------------|------------------|-----------------|------------|-----|
| Q9EQS0      | 490 P62804       | 376 P47727      | 340 Q9QW07 | 421 |
| Q561R9      | 477 Q8CJD3       | 363 Q9Z0V6      | 331 P06911 | 417 |
| Q63942      | 472 P35281       | 351 B0BNN3      | 320 P15399 | 416 |
| P55091      | 461 Q63751       | 343 Q6AYQ8      | 314 Q561R9 | 410 |
| B0BNN3      | 454 Q9QZK9       | 342 P14669      | 311 Q8CJD3 | 409 |
| Q4FZU6      | 444 Q6IFU8       | 320 P13432      | 310 Q91ZS3 | 402 |
| P27213      | 442 Q9Z0V6       | 318 P36374      | 298 Q99MH3 | 399 |
| Q63617      | 439 Q7TP52       | 317 P19629      | 293 P19218 | 397 |
| P02761      | 435 Q62997       | 317 Q6TMA8      | 279 P22006 | 396 |
| Q9R0T3      | 435 Q9QUL6       | 317 Q4FZU2      | 278 P11883 | 385 |
| A2RUV9      | 433 P42854       | 315 P24368      | 276 P36376 | 376 |
| Q4FZU2      | 430 Q5XI22       | 306 P97580      | 265 P97580 | 372 |
| P61206;P840 | 421 Q6IFU7       | 297 Q62894      | 258 Q30KJ2 | 364 |
| Q6TMA8      | 415 D3ZUC6       | 296 Q63661      | 248 Q6AYR9 | 362 |
| P15399      | 414 Q63661       | 282 Q9JI85      | 248 P08649 | 359 |
| Q63751      | 409 P02782       | 280 Q99MH3      | 248 Q63532 | 343 |
| Q6IFW6      | 406 P09605;P258C | 277 P02770      | 241 Q6P6R2 | 341 |
| Q30KJ2      | 405 P20646       | 270 P09605;P25E | 241 Q05695 | 335 |
| Q63532      | 402 P17046       | 270 O55145      | 231 P16636 | 334 |
| P00714      | 401 Q6IMF3       | 264 P60905      | 229 P47727 | 327 |
| P07171      | 392 P61206;P8407 | 258 P14408      | 229 P82471 | 324 |
| P62804      | 391 P08723       | 256 Q8CJ52      | 225 Q63661 | 319 |
| Q6P6Q2      | 385 P55314       | 247 F1LM93      | 221 P08290 | 317 |
| Q9Z1F2      | 375 Q6IFV1       | 242 P08010      | 217 P00762 | 314 |
| P06866      | 372 Q6IFW6       | 236 Q6P6R2      | 217 P53792 | 306 |
| Q6IFU7      | 370 Q63475       | 235 Q08849      | 216 Q64268 | 306 |
| Q10758      | 359 P07150       | 234 P53792      | 216 D3ZUK3 | 301 |
| P11598      | 356 Q9ESW0       | 227 Q63514      | 215 Q9JJS8 | 295 |
| Q62902      | 355 Q6IE51       | 225 P05369      | 212 P12785 | 285 |
| P53792      | 353 A2RUV9       | 220 P02091      | 210 Q9Z1F2 | 283 |
| O88267      | 336 P10758       | 215 P09006      | 210 P54921 | 273 |
| Q6IMF3      | 335 P36374       | 213 Q6IFU7      | 209 P31044 | 269 |
| P17046      | 321 P36376       | 209 P20762      | 199 Q5HZV9 | 268 |
| P22006      | 315 P27213       | 208 P19218      | 198 P04905 | 255 |
| P98089      | 303 P0C0A9       | 202 P42854      | 191 Q62975 | 255 |
| P07150      | 301 Q08849       | 180 P97584      | 188 P82995 | 252 |
| P83121      | 301 Q64057       | 175 Q63355      | 185 P17046 | 250 |
| P23593      | 297 P02761       | 171 P62804      | 184 D3ZUC6 | 242 |
| P19218      | 294 Q8VD89       | 165 Q9JJ22      | 178 Q9QX79 | 240 |
| Q6AYR9      | 286 P16636       | 164 D3ZUC6      | 178 Q9Z0V6 | 231 |
| P02780      | 284 P50280       | 162 Q62975      | 177 P13596 | 229 |
| P05539      | 271 P02625       | 161 D3ZUK3      | 176 Q5M819 | 229 |
| Q9QW07      | 270 O35547       | 160 P31044      | 167 P11762 | 228 |
| Q5QE79      | 264 Q8K4G9       | 158 P30120      | 167 Q9JHB9 | 226 |
| P68370      | 260 P53792       | 156 P08649      | 166 P0C0A9 | 223 |
| P97580      | 258 P01041       | 154 Q10758      | 163 P62804 | 220 |
| Q8VD89      | 248 Q9QZQ5       | 153 Q5FVI6      | 163 P35467 | 218 |
| Q9JJS8      | 246 P19218       | 153 Q00715      | 160 P25031 | 212 |
| Q6P6R2      | 246 P14669       | 146 Q63467      | 157 P06866 | 212 |
| P47967      | 242 Q9EQV9       | 139 P04905      | 156 Q63357 | 209 |
| P15999      | 238 Q5XFX0       | 139 O08815      | 154 Q6AYR8 | 207 |
| P05371      | 235 P51907       | 135 P17046      | 152 P08723 | 206 |
| Q9ESW0      | 235 Q00715       | 134 P09456      | 146 P02803 | 205 |
| P04218      | 233 P11598       | 125 P18418      | 143 Q63475 | 197 |
| P36970      | 219 O35783       | 121 Q06000      | 140 Q6IFU7 | 197 |
| P08649      | 218 Q5QE79       | 121 Q6IG02      | 132 Q62753 | 186 |
| Q64093      | 215 P05964       | 118 Q03191      | 131 Q5XI73 | 185 |
| Q6IFV1      | 207 Q6AYL6       | 116 P36970      | 130 P35281 | 185 |
| Q63493      | 206 P28648       | 115 Q9R0T3      | 129 P20759 | 180 |
| Q6PCU2      | 203 Q9JI85       | 106 Q62902      | 124 Q66H69 | 178 |
| P10536      | 198 P02770       | 105 P20760      | 123 P55091 | 176 |
| P08721      | 196 P19223       | 105 P35281      | 119 O54858 | 162 |
| P02625      | 189 Q6AYQ8       | 103 Q5M819      | 117 P02781 | 159 |
| O55004      | 186 P00762       | 103 Q6P777      | 116 P35444 | 159 |
| P02781      | 185 P82471       | 102 Q64057      | 109 P14480 | 154 |
| P10758      | 181 P08010       | 99 P34901       | 107 P23593 | 153 |
| Q6IFU8      | 179 P22282       | 94 P01041       | 107 P49744 | 152 |
| Q5M8C6      | 175 P01015       | 93 Q9Z1F2       | 105 P02782 | 151 |

|             |                 |           |                  |     |
|-------------|-----------------|-----------|------------------|-----|
| P20646      | 171 O55006      | 89 P35280 | 104 Q9QZK9       | 150 |
| Q64361      | 170 P08721      | 88 P11598 | 101 Q4AEF8       | 149 |
| Q9WTT6      | 169 Q8CIZ5      | 87 Q8CHN8 | 100 Q9QZ76       | 149 |
| P35467      | 167 P14408      | 83 Q6P6Q2 | 97 P18418        | 146 |
| P28648      | 166 P63036      | 80 Q6AY61 | 96 P97554        | 145 |
| Q00715      | 163 P31044      | 78 P27791 | 96 Q62902        | 137 |
| P01041      | 152 D4A1J4      | 76 Q99068 | 94 P14408        | 131 |
| P50280      | 150 P14668      | 75 P35467 | 90 P80201        | 128 |
| Q9QZA6      | 142 Q6TMA8      | 75 Q08464 | 89 P55016        | 126 |
| P04905      | 141 Q07523      | 75 P06866 | 89 Q07116        | 125 |
| P17475      | 140 P10959      | 73 P70709 | 88 F1LM93        | 122 |
| P62815      | 139 P14480      | 73 P04218 | 84 P15999        | 120 |
| P31430      | 133 Q6AY61      | 70 P10758 | 83 Q8K4G9        | 120 |
| O35547      | 133 O89117      | 68 Q812E4 | 83 Q6TMA8        | 119 |
| Q62997      | 129 Q64194      | 68 P16636 | 81 P00731        | 118 |
| Q09030      | 126 P68370      | 68 P02780 | 80 O88267        | 117 |
| P08753      | 126 Q8CJ52      | 68 P12785 | 77 Q68FS4        | 114 |
| Q9WUW8      | 123 Q09030      | 66 P17559 | 74 P38444        | 113 |
| F1LM93      | 121 O54800;Q5D\ | 66 P36376 | 73 P16391        | 113 |
| P06757      | 119 Q6AYR8      | 66 Q07116 | 71 P05964        | 110 |
| Q91ZS3      | 116 P55016      | 60 P11883 | 70 P47967        | 106 |
| P00762      | 116 Q498D9      | 57 P82995 | 69 Q9ESW0        | 104 |
| Q63317      | 114 Q62902      | 55 P97615 | 68 O08815        | 102 |
| P02793;Q7TF | 111 Q63355      | 54 P22283 | 66 P80020        | 101 |
| P14480      | 111 Q9QZA6      | 51 P20761 | 62 P05369        | 99  |
| Q63355      | 110 P36970      | 47 P38444 | 62 P36970        | 98  |
| P14408      | 107 Q6AY33      | 46 P49744 | 60 P70709        | 95  |
| P11883      | 107 O70417      | 46 Q8K4G9 | 59 P10758        | 94  |
| Q08849      | 103 Q99068      | 45 Q8VD89 | 58 P18427        | 92  |
| D3ZUC6      | 102 P55159      | 45 P52303 | 57 P08644        | 91  |
| Q498R7      | 101 Q62635      | 45 Q498R7 | 51 P22283        | 91  |
| O55006      | 99 P47727       | 43 Q9ESW0 | 51 Q6P6T1        | 91  |
| P82471      | 95 P70709       | 40 P35446 | 49 Q62740        | 90  |
| Q63475      | 94 Q63317       | 38 P07647 | 46 Q5ZQU0        | 86  |
| Q5XI22      | 94 Q9Z1F2       | 38 O88267 | 45 Q9JID2        | 85  |
| Q566E6      | 90 Q6AYR9       | 38 Q6NX65 | 45 Q63514        | 84  |
| Q8CJD3      | 90 P22283       | 38 O70417 | 45 Q8VD89        | 84  |
| Q5I0D1      | 89 Q5BJY9       | 38 P13852 | 42 O35783        | 83  |
| Q7TP52      | 88 Q9JID2       | 37 Q6AYL6 | 42 Q8CJ52        | 83  |
| Q498D9      | 88 Q8N7M5       | 35 Q5QE79 | 41 Q64057        | 81  |
| Q6AYL6      | 85 Q9ET32       | 35 Q6IFW6 | 39 O70417        | 73  |
| P08689      | 83 P05371       | 33 P14668 | 39 Q99PP0        | 69  |
| Q63661      | 82 Q9R0T3       | 33 P02761 | 38 P02793;Q7TP54 | 69  |
| P97615      | 81 Q62636       | 31 P24388 | 38 P35434        | 67  |
| G3V686      | 77 Q5U2V4       | 31 P22282 | 36 Q00715        | 66  |
| O08557      | 77 P30120       | 30 Q920G2 | 35 Q03191        | 60  |
| P14173      | 74 G3V686       | 29 P11762 | 34 Q5M871        | 59  |
| Q63357      | 73 P80020       | 29 P06761 | 34 P07897        | 58  |
| B4F795      | 68 Q6P9T8       | 29 P55016 | 34 Q9ET32        | 54  |
| Q63598      | 68 O70594       | 29 P00762 | 29 P11030        | 53  |
| Q9QX79      | 67 P14173       | 28 P04762 | 28 O54800;Q5DW   | 46  |
| P09456      | 67 F1LM93       | 28 P05964 | 28 P50280        | 44  |
| P23928      | 64 O70377       | 27 Q64335 | 28 O35568        | 43  |
| P02770      | 62 P05369       | 27 Q63357 | 28 P80202        | 43  |
| P97571      | 61 Q63598       | 24 Q9QZK9 | 27 P02780        | 42  |
| P05964      | 60 P07171       | 24 P16296 | 27 P09456        | 42  |
| P60905      | 56 P07647       | 21 P50280 | 27 Q99068        | 40  |
| Q64194      | 55 Q5I0D1       | 20 P17475 | 26 A2RUV9        | 40  |
| P29975      | 54 D3ZUK3       | 17 Q6IFV1 | 25 Q6PCU2        | 39  |
| O54858      | 53 Q63467       | 16 Q6PCU2 | 24 P51886        | 38  |
| Q62894      | 52 P36953       | 16 P85971 | 23 Q9WUW3        | 38  |
| P24368      | 52 Q02253       | 16 P22985 | 23 P02680        | 37  |
| Q7TPB1      | 52 Q9JJS8       | 15 P08644 | 20 P09605;P25809 | 35  |
| Q8K4G9      | 51 D3ZHA0       | 14 P19132 | 20 P08721        | 34  |
| P12368      | 51 P08753       | 14 P18427 | 20 Q5U2V4        | 33  |
| O54715      | 50 P08644       | 14 Q6IE52 | 19 Q62894        | 32  |
| P55018      | 49 P55053       | 13 Q01205 | 19 Q5QE79        | 32  |
| P82995      | 48 P02793;Q7TP  | 12 O54861 | 19 Q64611        | 31  |

|        |                |               |                |    |
|--------|----------------|---------------|----------------|----|
| Q5BJY9 | 47 D4A5U3      | 11 Q9QZA6     | 19 Q80YN4      | 30 |
| P12346 | 46 P15978      | 10 Q8N7M5     | 17 P22282      | 30 |
| Q6AYQ8 | 44 O54861      | 10 Q91ZS3     | 17 Q6Q7Y5      | 29 |
| P16391 | 41 Q561R9      | 10 P13596     | 16 P23785      | 29 |
| Q6AYS7 | 40 Q9R1T1      | 9 Q5I0D1      | 16 P22734      | 28 |
| Q5XFX0 | 40 P27590      | 9 P10719      | 16 P30120      | 27 |
| P36376 | 40 P30836      | 9 Q35568      | 15 P01015      | 27 |
| P97574 | 39 Q01205      | 9 Q9QX79      | 15 Q9JI85      | 26 |
| P35053 | 37 Q66H69      | 8 P20646      | 15 P11442      | 26 |
| P08010 | 35 P30904      | 8 P10959      | 14 Q9R1T5      | 25 |
| Q03191 | 35 P62815      | 8 Q5XI22      | 14 P08494      | 24 |
| P35281 | 34 O55004      | 8 P61206;P84C | 14 P05371      | 23 |
| P25031 | 33 Q5M819      | 8 Q71UF4      | 14 Q5I0D1      | 23 |
| P01015 | 32 B4F795      | 8 Q63317      | 13 P42854      | 22 |
| P18427 | 32 Q68FV8      | 7 P22006      | 13 Q6GMN2      | 21 |
| P97605 | 32 Q71MB6      | 7 Q55004      | 12 P24368      | 20 |
| P63029 | 29 Q35956      | 7 P05942      | 12 Q3T1K5      | 19 |
| Q923M1 | 25 Q4V885      | 6 P02680      | 12 Q920P0      | 19 |
| O08815 | 25 Q6P767      | 6 P0C0K7      | 11 Q8N7M5      | 18 |
| P04041 | 24 P24594      | 6 Q35783      | 11 Q99376      | 18 |
| P46844 | 24 Q05175      | 6 Q5M8C6      | 11 P26772      | 18 |
| Q05175 | 24 P06761      | 6 P07150      | 10 Q8CG08      | 17 |
| Q5HZV9 | 23 P97605      | 6 Q5RLM2      | 10 Q6P777      | 17 |
| P00731 | 23 P11883      | 6 Q9ET32      | 10 Q89117      | 17 |
| Q07936 | 22 P50398      | 5 Q63556      | 9 Q9QZA6       | 17 |
| O35783 | 21 Q6P777      | 5 P26772      | 9 P35446       | 16 |
| O54861 | 21 P08649      | 5 Q9JID2      | 9 Q6BEA2       | 16 |
| Q08463 | 19 P51886      | 5 Q4V885      | 8 Q8CHN8       | 16 |
| P12785 | 19 Q66HD0      | 5 Q80WY6      | 8 Q49858       | 15 |
| P46462 | 18 P08937      | 5 P46462      | 8 P15978       | 14 |
| Q62636 | 17 P04041      | 5 Q63751      | 8 Q6P9T8       | 14 |
| Q9EQV9 | 17 P32755      | 5 Q4AEF8      | 8 P10960       | 13 |
| Q62687 | 17 Q10758      | 5 Q64268      | 7 Q63598       | 13 |
| P02764 | 16 P38444      | 5 F1M3L7      | 7 Q64605       | 13 |
| P05369 | 16 Q99PP0      | 4 Q6IMF3      | 7 Q64335       | 12 |
| Q06496 | 15 Q9R044      | 4 Q62753      | 7 B5DFC9       | 11 |
| P50116 | 14 Q9JJ50      | 4 Q3T1K5      | 6 Q63355       | 11 |
| O70417 | 14 P24368      | 4 P01026      | 6 Q08849       | 11 |
| Q9ET32 | 14 O88267      | 4 P05712      | 6 O88600       | 11 |
| Q99068 | 14 O55145      | 4 P08721      | 5 Q63416       | 10 |
| P11762 | 13 Q9WUF4      | 4 P36953      | 5 P28648       | 10 |
| Q99PP0 | 13 P16391      | 4 P80020      | 5 Q70594       | 10 |
| P08932 | 12 P80201      | 4 P01015      | 5 P19223       | 10 |
| P70545 | 12 Q9QX79      | 3 P25031      | 5 Q566E6       | 10 |
| Q68FV8 | 12 Q62894      | 3 Q6IFU8      | 5 Q63317       | 9  |
| Q63424 | 12 P60905      | 3 Q05175      | 5 P63322       | 9  |
| P04073 | 12 Q8K1G0      | 3 Q64361      | 4 Q08557       | 9  |
| P40241 | 11 Q64573      | 3 P68370      | 4 P02651       | 9  |
| Q5U2V4 | 11 Q4G075      | 3 P29288      | 3 P14668       | 9  |
| P70709 | 10 Q63556      | 3 P27590      | 3 P07943       | 9  |
| P42854 | 10 P0DP29;PODF | 3 Q66H69      | 3 P02761       | 9  |
| Q80W57 | 10 B0BNN3      | 3 P80204      | 3 Q5XFX0       | 9  |
| P01048 | 9 P97608       | 2 Q70594      | 3 P60571       | 8  |
| P05712 | 8 P19939       | 2 Q02253      | 3 P14669       | 8  |
| D4A5U3 | 8 Q6IE52       | 2 P16391      | 3 P07861       | 8  |
| Q812E4 | 8 P02780       | 2 P02696      | 3 Q4V885       | 7  |
| Q8K1G0 | 7 P08494       | 2 Q63493      | 3 Q80WY6       | 7  |
| P35434 | 7 P80204       | 2 Q9JLS4      | 3 Q8CFN2       | 7  |
| Q68FS4 | 7 P06757       | 2 Q5ZQU0      | 2 O55145       | 7  |
| Q6IE51 | 7 Q6BEA2       | 2 P63322      | 2 Q01177       | 7  |
| Q9EPB1 | 7 Q64268       | 2 P15978      | 2 P21581       | 7  |
| P48199 | 7 P17559       | 2 P55159      | 2 Q9WUD9       | 6  |
| O70594 | 7 Q64361       | 1 Q9EQV9      | 2 Q9R044       | 6  |
| Q920P0 | 7 P00507       | 1 Q9QXQ0      | 2 P40241       | 6  |
| Q5M819 | 7 Q1WIM3       | 1 Q920P0      | 2 PODMMW0;PODN | 5  |
| Q923S2 | 6 P70502       | 1 P23739      | 2 P63095       | 5  |
| P80201 | 6 O88797       | 1 P04073      | 2 Q06000       | 5  |
| O35077 | 6 Q4AEF8       | 1 Q6P9T8      | 2 Q5FVI6       | 5  |

|            |                |               |                 |   |
|------------|----------------|---------------|-----------------|---|
| P53790     | 5 Q5M872       | 1 P69897      | 2 BOLT89        | 5 |
| Q64335     | 5 P02680       | 1 P02454      | 1 Q9WUC4        | 4 |
| P80254     | 5 Q920P0       | 1 P08290      | 1 P04897        | 4 |
| Q64611     | 5 P46720       | 1 P0DMW0;P0   | 1 P30836        | 4 |
| P63036     | 5 Q9Z0J6       | 1 P55053      | 1 P15473        | 4 |
| P29288     | 4 Q07936       | 1 P21743      | 1 P61206;P84079 | 4 |
| Q6AYR8     | 4 Q63357       | 1 P48037      | 1 P68370        | 4 |
| Q8R431     | 4 P04905       | 1 Q9EQV6      | 1 O54861        | 4 |
| P16573     | 4 P04073       | 1 P20171      | 1 Q08464        | 3 |
| P55016     | 4 Q63203       | 1 P28648      | 1 Q3MIE4        | 3 |
| Q63618     | 4 P35053       | 1 Q63618      | 1 Q64093        | 3 |
| Q6P767     | 3 A4KWA5;A4K   | 0 P04355      | 1 P30919        | 3 |
| P63095     | 3 B0BNA5       | 0 O70377      | 1 Q62636        | 3 |
| Q9QYU4     | 3 B0BND0       | 0 Q9WTW7      | 1 Q6IFW6        | 3 |
| P24388     | 3 B0BNE5       | 0 Q62687      | 1 Q9WUF4        | 3 |
| P14046     | 3 BOLT89       | 0 Q9QWJ9      | 1 P12368        | 3 |
| Q6GMN2     | 3 B1H234       | 0 P80201      | 1 P38659        | 2 |
| P02696     | 3 B2RYG6       | 0 A4KWA5;A4I  | 0 Q5I0D5        | 2 |
| P19814     | 2 B5DEN9       | 0 B0BNA5      | 0 P19939        | 2 |
| P97584     | 2 B5DFC9       | 0 B0BND0      | 0 Q91XN4        | 2 |
| Q9R1T1     | 2 D3Z8L7       | 0 B0BNE5      | 0 P04276        | 2 |
| P13265     | 2 D3ZTD8       | 0 BOLT89      | 0 P01041        | 2 |
| Q6Q0N1     | 2 D3ZTE0       | 0 B1H234      | 0 P97574        | 2 |
| P38918     | 2 D3ZTV3       | 0 B2RYG6      | 0 Q5BJP3        | 2 |
| P46720     | 2 D3ZTX0       | 0 B4F795      | 0 P05942        | 2 |
| P17559     | 2 D4A1R8       | 0 B5DEN9      | 0 P04355        | 2 |
| P62898     | 2 E9PT87;P2068 | 0 B5DFC9      | 0 P70545        | 2 |
| P09527     | 2 F1M3L7       | 0 D3Z8L7      | 0 P69897        | 2 |
| P32755     | 2 G3V7W1       | 0 D3ZHA0      | 0 Q32KJ6        | 2 |
| Q64319     | 2 H1UBN0;Q5B   | 0 D3ZTD8      | 0 P04937        | 2 |
| O55096     | 2 O08557       | 0 D3ZTE0      | 0 Q9EQV6        | 1 |
| Q80WY6     | 1 O08628       | 0 D3ZTV3      | 0 P97584        | 1 |
| P08289     | 1 O08815       | 0 D3ZTX0      | 0 P21743        | 1 |
| P10959     | 1 O09175       | 0 D4A1J4      | 0 P61589        | 1 |
| P52303     | 1 O35077       | 0 D4A1R8      | 0 Q6RUV5        | 1 |
| P55053     | 1 O35112       | 0 D4A5U3      | 0 P16573        | 1 |
| Q8CFN2     | 1 O35142       | 0 E9PT87;P206 | 0 Q68FV8        | 1 |
| Q9QZK8     | 1 O35217       | 0 G3V7W1      | 0 P15087        | 1 |
| Q6P9T8     | 1 O35244       | 0 H1UBN0;Q5I  | 0 P46844        | 1 |
| P30919     | 1 O35264       | 0 O08557      | 0 P32755        | 1 |
| Q64057     | 1 O35331       | 0 O08628      | 0 D4A5U3        | 1 |
| O89117     | 1 O35509;P624  | 0 O09175      | 0 Q9QXQ0        | 1 |
| Q5RLM2     | 1 O35568       | 0 O35077      | 0 Q9WTT6        | 1 |
| P23785     | 1 O35760       | 0 O35112      | 0 P08689        | 1 |
| Q9JJ50     | 1 O35763       | 0 O35142      | 0 P18484        | 1 |
| P07151     | 1 O35952       | 0 O35217      | 0 P97608        | 1 |
| Q6RUV5     | 1 O54715       | 0 O35244      | 0 Q5XI22        | 1 |
| P08644     | 1 O54858       | 0 O35264      | 0 Q63150        | 1 |
| Q62975     | 1 O54975       | 0 O35331      | 0 Q63072        | 1 |
| P04636     | 1 O55096       | 0 O35509;P624 | 0 P17559        | 1 |
| Q6JE36     | 1 O70244       | 0 O35760      | 0 P68511        | 1 |
| A4KWA5;A4K | 0 O70352       | 0 O35763      | 0 A4KWA5;A4KW   | 0 |
| B0BNA5     | 0 O70489       | 0 O35952      | 0 B0BNA5        | 0 |
| B0BND0     | 0 O70513       | 0 O35956      | 0 B0BND0        | 0 |
| B0BNE5     | 0 O70535       | 0 O54715      | 0 B0BNE5        | 0 |
| BOLT89     | 0 O70540       | 0 O54800;Q5E  | 0 B1H234        | 0 |
| B1H234     | 0 O88204       | 0 O54858      | 0 B2RYG6        | 0 |
| B2RYG6     | 0 O88600       | 0 O54975      | 0 B4F795        | 0 |
| B5DEN9     | 0 O88766       | 0 O55006      | 0 B5DEN9        | 0 |
| B5DFC9     | 0 O88767       | 0 O55096      | 0 D3Z8L7        | 0 |
| D3Z8L7     | 0 O88917       | 0 O70244      | 0 D3ZHA0        | 0 |
| D3ZTD8     | 0 O88989       | 0 O70352      | 0 D3ZTD8        | 0 |
| D3ZTE0     | 0 O89049       | 0 O70489      | 0 D3ZTE0        | 0 |
| D3ZTV3     | 0 P00502       | 0 O70513      | 0 D3ZTV3        | 0 |
| D3ZTX0     | 0 P00689       | 0 O70535      | 0 D3ZTX0        | 0 |
| D3ZUK3     | 0 P00758       | 0 O70540      | 0 D4A1J4        | 0 |
| D4A1J4     | 0 P00786       | 0 O88204      | 0 D4A1R8        | 0 |
| D4A1R8     | 0 P00787       | 0 O88600      | 0 E9PT87;P20689 | 0 |

|             |               |          |                 |   |
|-------------|---------------|----------|-----------------|---|
| E9PT87;P206 | 0 P00884      | 0 O88766 | 0 F1M3L7        | 0 |
| F1M3L7      | 0 P01026      | 0 O88767 | 0 G3V7W1        | 0 |
| G3V7W1      | 0 P01048      | 0 O88797 | 0 H1UBN0;Q5BJS  | 0 |
| H1UBN0;Q5E  | 0 P01830      | 0 O88917 | 0 O08628        | 0 |
| O08628      | 0 P02454      | 0 O88989 | 0 O09175        | 0 |
| O09175      | 0 P02650      | 0 O89049 | 0 O35077        | 0 |
| O35112      | 0 P02651      | 0 O89117 | 0 O35112        | 0 |
| O35142      | 0 P02696      | 0 P00502 | 0 O35142        | 0 |
| O35217      | 0 P02764      | 0 P00689 | 0 O35217        | 0 |
| O35244      | 0 P02767      | 0 P00731 | 0 O35244        | 0 |
| O35264      | 0 P02781      | 0 P00758 | 0 O35264        | 0 |
| O35331      | 0 P03994      | 0 P00774 | 0 O35331        | 0 |
| O35509;P624 | 0 P04176      | 0 P00786 | 0 O35509;P62494 | 0 |
| O35568      | 0 P04182      | 0 P00787 | 0 O35760        | 0 |
| O35760      | 0 P04218      | 0 P00884 | 0 O35763        | 0 |
| O35763      | 0 P04276      | 0 P01048 | 0 O35952        | 0 |
| O35952      | 0 P04355      | 0 P01830 | 0 O35956        | 0 |
| O35956      | 0 P04636      | 0 P02650 | 0 O54715        | 0 |
| O54800;Q5D  | 0 P04639      | 0 P02651 | 0 O54975        | 0 |
| O54975      | 0 P04642      | 0 P02764 | 0 O55004        | 0 |
| O55145      | 0 P04762      | 0 P02767 | 0 O55006        | 0 |
| O70244      | 0 P04764      | 0 P03994 | 0 O55096        | 0 |
| O70352      | 0 P04785      | 0 P04041 | 0 O70244        | 0 |
| O70377      | 0 P04797      | 0 P04176 | 0 O70352        | 0 |
| O70489      | 0 P04897      | 0 P04276 | 0 O70377        | 0 |
| O70513      | 0 P04903      | 0 P04636 | 0 O70489        | 0 |
| O70535      | 0 P04904      | 0 P04639 | 0 O70513        | 0 |
| O70540      | 0 P04906      | 0 P04642 | 0 O70535        | 0 |
| O88204      | 0 P04916      | 0 P04764 | 0 O70540        | 0 |
| O88600      | 0 P04937      | 0 P04785 | 0 O88204        | 0 |
| O88766      | 0 P05065      | 0 P04797 | 0 O88766        | 0 |
| O88767      | 0 P05197      | 0 P04897 | 0 O88767        | 0 |
| O88797      | 0 P05544      | 0 P04903 | 0 O88797        | 0 |
| O88917      | 0 P05545      | 0 P04904 | 0 O88917        | 0 |
| O88989      | 0 P05712      | 0 P04906 | 0 O88989        | 0 |
| O89049      | 0 P05942      | 0 P04916 | 0 O89049        | 0 |
| P00502      | 0 P06399      | 0 P04937 | 0 P00502        | 0 |
| P00507      | 0 P06685      | 0 P05065 | 0 P00507        | 0 |
| P00689      | 0 P06866      | 0 P05197 | 0 P00689        | 0 |
| P00758      | 0 P07151      | 0 P05371 | 0 P00758        | 0 |
| P00774      | 0 P07154      | 0 P05544 | 0 P00786        | 0 |
| P00786      | 0 P07314      | 0 P05545 | 0 P00787        | 0 |
| P00787      | 0 P07340      | 0 P06399 | 0 P00884        | 0 |
| P00884      | 0 P07379      | 0 P06685 | 0 P01026        | 0 |
| P01026      | 0 P07483      | 0 P06757 | 0 P01048        | 0 |
| P01830      | 0 P07522      | 0 P07151 | 0 P01830        | 0 |
| P02454      | 0 P07632      | 0 P07154 | 0 P02454        | 0 |
| P02650      | 0 P07861      | 0 P07314 | 0 P02650        | 0 |
| P02651      | 0 P07897      | 0 P07340 | 0 P02696        | 0 |
| P02680      | 0 P07943      | 0 P07379 | 0 P02764        | 0 |
| P02767      | 0 P08289      | 0 P07483 | 0 P02767        | 0 |
| P03994      | 0 P08290      | 0 P07522 | 0 P02770        | 0 |
| P04176      | 0 P08460      | 0 P07632 | 0 P03994        | 0 |
| P04182      | 0 P08592      | 0 P07861 | 0 P04041        | 0 |
| P04276      | 0 P08650      | 0 P07897 | 0 P04073        | 0 |
| P04355      | 0 P08689      | 0 P07943 | 0 P04176        | 0 |
| P04639      | 0 P08932      | 0 P08289 | 0 P04182        | 0 |
| P04642      | 0 P08934      | 0 P08460 | 0 P04218        | 0 |
| P04762      | 0 P09006      | 0 P08494 | 0 P04636        | 0 |
| P04764      | 0 P09034      | 0 P08592 | 0 P04639        | 0 |
| P04785      | 0 P09456      | 0 P08650 | 0 P04642        | 0 |
| P04797      | 0 P09527      | 0 P08689 | 0 P04762        | 0 |
| P04897      | 0 P09606      | 0 P08932 | 0 P04764        | 0 |
| P04903      | 0 P0C0K7      | 0 P08934 | 0 P04785        | 0 |
| P04904      | 0 P0CG51;P629 | 0 P08937 | 0 P04797        | 0 |
| P04906      | 0 P0DMW0;P0C  | 0 P09034 | 0 P04903        | 0 |
| P04916      | 0 P10111      | 0 P09527 | 0 P04904        | 0 |
| P04937      | 0 P10247      | 0 P09606 | 0 P04906        | 0 |

|             |          |               |                |   |
|-------------|----------|---------------|----------------|---|
| P05065      | 0 P10252 | 0 P0CG51;P629 | 0 P04916       | 0 |
| P05197      | 0 P10536 | 0 P0DP29;P0D  | 0 P05065       | 0 |
| P05544      | 0 P10719 | 0 P10111      | 0 P05197       | 0 |
| P05545      | 0 P10760 | 0 P10247      | 0 P05544       | 0 |
| P05942      | 0 P10960 | 0 P10252      | 0 P05545       | 0 |
| P06399      | 0 P11030 | 0 P10536      | 0 P05712       | 0 |
| P06685      | 0 P11232 | 0 P10760      | 0 P06399       | 0 |
| P07154      | 0 P11348 | 0 P10960      | 0 P06685       | 0 |
| P07314      | 0 P11442 | 0 P11030      | 0 P06757       | 0 |
| P07340      | 0 P11762 | 0 P11232      | 0 P06761       | 0 |
| P07379      | 0 P11980 | 0 P11348      | 0 P07150       | 0 |
| P07483      | 0 P12346 | 0 P11442      | 0 P07151       | 0 |
| P07522      | 0 P12368 | 0 P11980      | 0 P07154       | 0 |
| P07632      | 0 P13221 | 0 P12346      | 0 P07314       | 0 |
| P07861      | 0 P13265 | 0 P12368      | 0 P07340       | 0 |
| P07897      | 0 P13596 | 0 P13221      | 0 P07379       | 0 |
| P07943      | 0 P13635 | 0 P13265      | 0 P07483       | 0 |
| P08290      | 0 P13852 | 0 P13635      | 0 P07522       | 0 |
| P08460      | 0 P14046 | 0 P14046      | 0 P07632       | 0 |
| P08494      | 0 P14562 | 0 P14173      | 0 P07647       | 0 |
| P08592      | 0 P14630 | 0 P14562      | 0 P08289       | 0 |
| P08650      | 0 P14740 | 0 P14630      | 0 P08460       | 0 |
| P08934      | 0 P14841 | 0 P14740      | 0 P08592       | 0 |
| P09006      | 0 P14925 | 0 P14841      | 0 P08650       | 0 |
| P09034      | 0 P14942 | 0 P14925      | 0 P08932       | 0 |
| P09606      | 0 P15083 | 0 P14942      | 0 P08934       | 0 |
| P0C0K7      | 0 P15087 | 0 P15083      | 0 P08937       | 0 |
| P0CG51;P629 | 0 P15473 | 0 P15087      | 0 P09006       | 0 |
| P0DMW0;P0D  | 0 P15684 | 0 P15473      | 0 P09034       | 0 |
| P0DP29;P0D  | 0 P15800 | 0 P15684      | 0 P09527       | 0 |
| P10111      | 0 P15943 | 0 P15800      | 0 P09606       | 0 |
| P10247      | 0 P15999 | 0 P15943      | 0 P0C0K7       | 0 |
| P10252      | 0 P16228 | 0 P15999      | 0 P0CG51;P6298 | 0 |
| P10719      | 0 P16296 | 0 P16228      | 0 P0DP29;P0DP3 | 0 |
| P10760      | 0 P16310 | 0 P16310      | 0 P10111       | 0 |
| P10960      | 0 P16573 | 0 P16573      | 0 P10247       | 0 |
| P11030      | 0 P16617 | 0 P16617      | 0 P10252       | 0 |
| P11232      | 0 P17164 | 0 P17164      | 0 P10536       | 0 |
| P11348      | 0 P17475 | 0 P18292      | 0 P10719       | 0 |
| P11442      | 0 P18292 | 0 P18297      | 0 P10760       | 0 |
| P11980      | 0 P18297 | 0 P18484      | 0 P10959       | 0 |
| P13221      | 0 P18427 | 0 P18757      | 0 P11232       | 0 |
| P13596      | 0 P18484 | 0 P19112      | 0 P11348       | 0 |
| P13635      | 0 P18757 | 0 P19223      | 0 P11980       | 0 |
| P13852      | 0 P19112 | 0 P19468      | 0 P12346       | 0 |
| P14562      | 0 P19132 | 0 P19804      | 0 P13221       | 0 |
| P14630      | 0 P19468 | 0 P19814      | 0 P13265       | 0 |
| P14740      | 0 P19804 | 0 P19939      | 0 P13635       | 0 |
| P14841      | 0 P19814 | 0 P20059      | 0 P13852       | 0 |
| P14925      | 0 P20059 | 0 P20611      | 0 P14046       | 0 |
| P14942      | 0 P20171 | 0 P20673      | 0 P14173       | 0 |
| P15083      | 0 P20611 | 0 P20759      | 0 P14562       | 0 |
| P15087      | 0 P20673 | 0 P20767      | 0 P14630       | 0 |
| P15473      | 0 P20759 | 0 P20786      | 0 P14740       | 0 |
| P15684      | 0 P20767 | 0 P20961      | 0 P14841       | 0 |
| P15800      | 0 P20786 | 0 P21581      | 0 P14925       | 0 |
| P15943      | 0 P20961 | 0 P21674      | 0 P14942       | 0 |
| P15978      | 0 P21581 | 0 P21704      | 0 P15083       | 0 |
| P16228      | 0 P21674 | 0 P22057      | 0 P15684       | 0 |
| P16296      | 0 P21704 | 0 P22273      | 0 P15800       | 0 |
| P16310      | 0 P21743 | 0 P22734      | 0 P15943       | 0 |
| P16617      | 0 P22057 | 0 P23377      | 0 P16228       | 0 |
| P17164      | 0 P22273 | 0 P23593      | 0 P16296       | 0 |
| P18292      | 0 P22734 | 0 P23680      | 0 P16310       | 0 |
| P18297      | 0 P22985 | 0 P23764      | 0 P16617       | 0 |
| P18484      | 0 P23377 | 0 P23785      | 0 P17164       | 0 |
| P18757      | 0 P23593 | 0 P23928      | 0 P17475       | 0 |
| P19112      | 0 P23680 | 0 P24090      | 0 P18292       | 0 |

|        |          |          |          |   |
|--------|----------|----------|----------|---|
| P19132 | 0 P23739 | 0 P24268 | 0 P18297 | 0 |
| P19468 | 0 P23764 | 0 P24594 | 0 P18757 | 0 |
| P19804 | 0 P23785 | 0 P25093 | 0 P19112 | 0 |
| P19939 | 0 P23928 | 0 P25113 | 0 P19132 | 0 |
| P20059 | 0 P24090 | 0 P25304 | 0 P19468 | 0 |
| P20171 | 0 P24268 | 0 P26051 | 0 P19804 | 0 |
| P20611 | 0 P24388 | 0 P26342 | 0 P19814 | 0 |
| P20673 | 0 P25093 | 0 P26453 | 0 P20059 | 0 |
| P20759 | 0 P25113 | 0 P26644 | 0 P20171 | 0 |
| P20767 | 0 P25304 | 0 P27139 | 0 P20611 | 0 |
| P20786 | 0 P26051 | 0 P27213 | 0 P20646 | 0 |
| P20961 | 0 P26342 | 0 P27274 | 0 P20673 | 0 |
| P21581 | 0 P26453 | 0 P27605 | 0 P20760 | 0 |
| P21674 | 0 P26644 | 0 P27867 | 0 P20761 | 0 |
| P21704 | 0 P26772 | 0 P28037 | 0 P20767 | 0 |
| P21743 | 0 P27139 | 0 P28494 | 0 P20786 | 0 |
| P22057 | 0 P27274 | 0 P28826 | 0 P20961 | 0 |
| P22273 | 0 P27605 | 0 P29534 | 0 P21674 | 0 |
| P22734 | 0 P27791 | 0 P29598 | 0 P21704 | 0 |
| P22985 | 0 P27867 | 0 P29975 | 0 P22057 | 0 |
| P23377 | 0 P28037 | 0 P30121 | 0 P22273 | 0 |
| P23680 | 0 P28494 | 0 P30152 | 0 P22985 | 0 |
| P23739 | 0 P28826 | 0 P30713 | 0 P23377 | 0 |
| P23764 | 0 P29288 | 0 P30836 | 0 P23680 | 0 |
| P24090 | 0 P29534 | 0 P30904 | 0 P23739 | 0 |
| P24268 | 0 P29598 | 0 P30919 | 0 P23764 | 0 |
| P24594 | 0 P29975 | 0 P31211 | 0 P23928 | 0 |
| P25093 | 0 P30121 | 0 P31430 | 0 P24090 | 0 |
| P25113 | 0 P30152 | 0 P31977 | 0 P24268 | 0 |
| P25304 | 0 P30713 | 0 P32038 | 0 P24388 | 0 |
| P26051 | 0 P30919 | 0 P32755 | 0 P24594 | 0 |
| P26342 | 0 P31211 | 0 P34058 | 0 P25093 | 0 |
| P26453 | 0 P31977 | 0 P34080 | 0 P25113 | 0 |
| P26644 | 0 P32038 | 0 P35053 | 0 P25304 | 0 |
| P26772 | 0 P34058 | 0 P35213 | 0 P26051 | 0 |
| P27139 | 0 P34080 | 0 P35434 | 0 P26342 | 0 |
| P27274 | 0 P35213 | 0 P35444 | 0 P26453 | 0 |
| P27590 | 0 P35434 | 0 P35704 | 0 P26644 | 0 |
| P27605 | 0 P35444 | 0 P35859 | 0 P27139 | 0 |
| P27791 | 0 P35446 | 0 P35952 | 0 P27274 | 0 |
| P27867 | 0 P35704 | 0 P36373 | 0 P27590 | 0 |
| P28037 | 0 P35859 | 0 P38438 | 0 P27605 | 0 |
| P28494 | 0 P35952 | 0 P38652 | 0 P27791 | 0 |
| P28826 | 0 P36373 | 0 P38659 | 0 P27867 | 0 |
| P29534 | 0 P38438 | 0 P38918 | 0 P28037 | 0 |
| P29598 | 0 P38652 | 0 P39069 | 0 P28494 | 0 |
| P30121 | 0 P38659 | 0 P40241 | 0 P28826 | 0 |
| P30152 | 0 P38918 | 0 P41498 | 0 P29288 | 0 |
| P30713 | 0 P39069 | 0 P41562 | 0 P29534 | 0 |
| P30836 | 0 P40241 | 0 P42123 | 0 P29598 | 0 |
| P30904 | 0 P41498 | 0 P43303 | 0 P29975 | 0 |
| P31211 | 0 P41562 | 0 P43427 | 0 P30121 | 0 |
| P31977 | 0 P42123 | 0 P45479 | 0 P30152 | 0 |
| P32038 | 0 P43303 | 0 P45592 | 0 P30713 | 0 |
| P34058 | 0 P43427 | 0 P46413 | 0 P30904 | 0 |
| P34080 | 0 P45479 | 0 P46720 | 0 P31211 | 0 |
| P35213 | 0 P45592 | 0 P46844 | 0 P31430 | 0 |
| P35444 | 0 P46413 | 0 P46953 | 0 P31977 | 0 |
| P35446 | 0 P46462 | 0 P47820 | 0 P32038 | 0 |
| P35704 | 0 P46844 | 0 P47853 | 0 P34058 | 0 |
| P35859 | 0 P46953 | 0 P48032 | 0 P34080 | 0 |
| P35952 | 0 P47820 | 0 P48199 | 0 P35053 | 0 |
| P36373 | 0 P47853 | 0 P48284 | 0 P35213 | 0 |
| P36953 | 0 P48032 | 0 P48500 | 0 P35280 | 0 |
| P38438 | 0 P48037 | 0 P48508 | 0 P35704 | 0 |
| P38444 | 0 P48199 | 0 P49002 | 0 P35859 | 0 |
| P38652 | 0 P48284 | 0 P49134 | 0 P35952 | 0 |
| P38659 | 0 P48500 | 0 P50115 | 0 P36373 | 0 |



|             |               |               |                 |   |
|-------------|---------------|---------------|-----------------|---|
| P39069      | 0 P48508      | 0 P50116      | 0 P36953        | 0 |
| P41498      | 0 P49002      | 0 P50123      | 0 P38438        | 0 |
| P41562      | 0 P49134      | 0 P50137      | 0 P38652        | 0 |
| P42123      | 0 P49744      | 0 P50398      | 0 P38918        | 0 |
| P43303      | 0 P50115      | 0 P50399      | 0 P39069        | 0 |
| P43427      | 0 P50116      | 0 P50430      | 0 P41498        | 0 |
| P45479      | 0 P50123      | 0 P50503      | 0 P41562        | 0 |
| P45592      | 0 P50137      | 0 P50609      | 0 P42123        | 0 |
| P46413      | 0 P50399      | 0 P51635      | 0 P43303        | 0 |
| P46953      | 0 P50430      | 0 P51647      | 0 P43427        | 0 |
| P47820      | 0 P50503      | 0 P51886      | 0 P45479        | 0 |
| P47853      | 0 P50609      | 0 P52759      | 0 P45592        | 0 |
| P48032      | 0 P51635      | 0 P52796      | 0 P46413        | 0 |
| P48037      | 0 P51647      | 0 P52847      | 0 P46462        | 0 |
| P48284      | 0 P52303      | 0 P53369      | 0 P46720        | 0 |
| P48500      | 0 P52759      | 0 P53790      | 0 P46953        | 0 |
| P48508      | 0 P52796      | 0 P53813      | 0 P47820        | 0 |
| P49002      | 0 P52847      | 0 P54311      | 0 P47853        | 0 |
| P49134      | 0 P53369      | 0 P54313      | 0 P48032        | 0 |
| P49744      | 0 P53790      | 0 P54921      | 0 P48037        | 0 |
| P50123      | 0 P53813      | 0 P55018      | 0 P48199        | 0 |
| P50137      | 0 P54311      | 0 P55091      | 0 P48284        | 0 |
| P50398      | 0 P54313      | 0 P55146      | 0 P48500        | 0 |
| P50399      | 0 P54921      | 0 P55260      | 0 P48508        | 0 |
| P50430      | 0 P55018      | 0 P55281      | 0 P49002        | 0 |
| P50503      | 0 P55146      | 0 P57097      | 0 P49134        | 0 |
| P50609      | 0 P55260      | 0 P57113      | 0 P50123        | 0 |
| P51635      | 0 P55281      | 0 P58195      | 0 P50137        | 0 |
| P51647      | 0 P57097      | 0 P60571      | 0 P50398        | 0 |
| P51886      | 0 P57113      | 0 P60711;P632 | 0 P50399        | 0 |
| P52759      | 0 P58195      | 0 P61107      | 0 P50430        | 0 |
| P52796      | 0 P60571      | 0 P61459      | 0 P50503        | 0 |
| P52847      | 0 P60711;P632 | 0 P61589      | 0 P50609        | 0 |
| P53369      | 0 P61107      | 0 P61943      | 0 P51635        | 0 |
| P53813      | 0 P61459      | 0 P61972      | 0 P51647        | 0 |
| P54311      | 0 P61589      | 0 P61983      | 0 P52303        | 0 |
| P54313      | 0 P61943      | 0 P62260      | 0 P52759        | 0 |
| P54921      | 0 P61972      | 0 P62630      | 0 P52796        | 0 |
| P55146      | 0 P61983      | 0 P62815      | 0 P52847        | 0 |
| P55159      | 0 P62260      | 0 P62836      | 0 P53369        | 0 |
| P55260      | 0 P62630      | 0 P62898      | 0 P53790        | 0 |
| P55281      | 0 P62836      | 0 P62959      | 0 P53813        | 0 |
| P57097      | 0 P62898      | 0 P62963      | 0 P54311        | 0 |
| P57113      | 0 P62959      | 0 P63018      | 0 P54313        | 0 |
| P58195      | 0 P62963      | 0 P63029      | 0 P55018        | 0 |
| P60571      | 0 P63018      | 0 P63036      | 0 P55053        | 0 |
| P60711;P632 | 0 P63029      | 0 P63095      | 0 P55146        | 0 |
| P61107      | 0 P63095      | 0 P63102      | 0 P55159        | 0 |
| P61459      | 0 P63102      | 0 P63331      | 0 P55260        | 0 |
| P61589      | 0 P63322      | 0 P68035;P681 | 0 P55281        | 0 |
| P61943      | 0 P63331      | 0 P68255      | 0 P57097        | 0 |
| P61972      | 0 P68035;P681 | 0 P68511      | 0 P57113        | 0 |
| P61983      | 0 P68255      | 0 P70470      | 0 P58195        | 0 |
| P62260      | 0 P68511      | 0 P70490      | 0 P60711;P63259 | 0 |
| P62630      | 0 P69897      | 0 P70502      | 0 P61107        | 0 |
| P62836      | 0 P70470      | 0 P70545      | 0 P61459        | 0 |
| P62959      | 0 P70490      | 0 P70619      | 0 P61943        | 0 |
| P62963      | 0 P70545      | 0 P80067      | 0 P61972        | 0 |
| P63018      | 0 P70619      | 0 P80202      | 0 P61983        | 0 |
| P63102      | 0 P80067      | 0 P80254      | 0 P62260        | 0 |
| P63322      | 0 P80202      | 0 P81827      | 0 P62630        | 0 |
| P63331      | 0 P80254      | 0 P81828      | 0 P62815        | 0 |
| P68035;P681 | 0 P81827      | 0 P82450      | 0 P62836        | 0 |
| P68255      | 0 P81828      | 0 P84039      | 0 P62898        | 0 |
| P68511      | 0 P82450      | 0 P85968      | 0 P62959        | 0 |
| P69897      | 0 P84039      | 0 P85973      | 0 P62963        | 0 |
| P70470      | 0 P85968      | 0 P97532      | 0 P63018        | 0 |
| P70490      | 0 P85971      | 0 P97546      | 0 P63029        | 0 |

|        |          |          |                 |   |
|--------|----------|----------|-----------------|---|
| P70502 | 0 P85973 | 0 P97553 | 0 P63036        | 0 |
| P70619 | 0 P97532 | 0 P97554 | 0 P63102        | 0 |
| P80020 | 0 P97546 | 0 P97571 | 0 P63331        | 0 |
| P80067 | 0 P97553 | 0 P97574 | 0 P68035;P68136 | 0 |
| P80202 | 0 P97554 | 0 P97603 | 0 P68255        | 0 |
| P80204 | 0 P97571 | 0 P97608 | 0 P70470        | 0 |
| P81827 | 0 P97574 | 0 P97675 | 0 P70490        | 0 |
| P81828 | 0 P97584 | 0 P97697 | 0 P70502        | 0 |
| P82450 | 0 P97603 | 0 P97710 | 0 P70619        | 0 |
| P84039 | 0 P97615 | 0 P97829 | 0 P80067        | 0 |
| P85968 | 0 P97675 | 0 P98089 | 0 P80204        | 0 |
| P85971 | 0 P97697 | 0 P98106 | 0 P80254        | 0 |
| P85973 | 0 P97710 | 0 P98158 | 0 P81827        | 0 |
| P97532 | 0 P97829 | 0 Q00238 | 0 P81828        | 0 |
| P97546 | 0 P98106 | 0 Q00495 | 0 P82450        | 0 |
| P97553 | 0 P98158 | 0 Q00657 | 0 P84039        | 0 |
| P97554 | 0 Q00238 | 0 Q01177 | 0 P85968        | 0 |
| P97603 | 0 Q00495 | 0 Q01460 | 0 P85973        | 0 |
| P97608 | 0 Q00657 | 0 Q02765 | 0 P97532        | 0 |
| P97675 | 0 Q01177 | 0 Q02974 | 0 P97546        | 0 |
| P97697 | 0 Q01460 | 0 Q03336 | 0 P97553        | 0 |
| P97710 | 0 Q02765 | 0 Q03626 | 0 P97571        | 0 |
| P97829 | 0 Q02974 | 0 Q04589 | 0 P97603        | 0 |
| P98106 | 0 Q03336 | 0 Q04807 | 0 P97615        | 0 |
| P98158 | 0 Q03626 | 0 Q05030 | 0 P97675        | 0 |
| Q00238 | 0 Q04589 | 0 Q05511 | 0 P97697        | 0 |
| Q00495 | 0 Q04807 | 0 Q05695 | 0 P97710        | 0 |
| Q00657 | 0 Q05030 | 0 Q05820 | 0 P97829        | 0 |
| Q01177 | 0 Q05511 | 0 Q06496 | 0 P98106        | 0 |
| Q01205 | 0 Q05695 | 0 Q06880 | 0 P98158        | 0 |
| Q01460 | 0 Q05820 | 0 Q07523 | 0 Q00238        | 0 |
| Q02253 | 0 Q06000 | 0 Q07936 | 0 Q00495        | 0 |
| Q02765 | 0 Q06496 | 0 Q08406 | 0 Q00657        | 0 |
| Q02974 | 0 Q06880 | 0 Q08415 | 0 Q01460        | 0 |
| Q03336 | 0 Q07116 | 0 Q08420 | 0 Q02253        | 0 |
| Q03626 | 0 Q08406 | 0 Q08463 | 0 Q02765        | 0 |
| Q04589 | 0 Q08415 | 0 Q09326 | 0 Q02974        | 0 |
| Q04807 | 0 Q08420 | 0 Q0PMD2 | 0 Q03336        | 0 |
| Q05030 | 0 Q08463 | 0 Q1WIM1 | 0 Q03626        | 0 |
| Q05511 | 0 Q08464 | 0 Q1WIM3 | 0 Q04589        | 0 |
| Q05695 | 0 Q09326 | 0 Q32KJ6 | 0 Q04807        | 0 |
| Q05820 | 0 Q0PMD2 | 0 Q32PY2 | 0 Q05030        | 0 |
| Q06000 | 0 Q1WIM1 | 0 Q3KRC4 | 0 Q05175        | 0 |
| Q06880 | 0 Q32KJ6 | 0 Q3MIE4 | 0 Q05511        | 0 |
| Q07116 | 0 Q32PY2 | 0 Q3T1J1 | 0 Q05820        | 0 |
| Q07523 | 0 Q3KRC4 | 0 Q3T1J9 | 0 Q06496        | 0 |
| Q08406 | 0 Q3MIE4 | 0 Q3ZAV1 | 0 Q06880        | 0 |
| Q08415 | 0 Q3T1J1 | 0 Q497B0 | 0 Q07523        | 0 |
| Q08420 | 0 Q3T1J9 | 0 Q498D9 | 0 Q07936        | 0 |
| Q08464 | 0 Q3T1K5 | 0 Q498S8 | 0 Q08406        | 0 |
| Q09326 | 0 Q3ZAV1 | 0 Q499T2 | 0 Q08415        | 0 |
| Q0PMD2 | 0 Q497B0 | 0 Q4FZV0 | 0 Q08420        | 0 |
| Q1WIM1 | 0 Q498R7 | 0 Q4G075 | 0 Q08463        | 0 |
| Q1WIM3 | 0 Q498S8 | 0 Q4KLZ6 | 0 Q09326        | 0 |
| Q32KJ6 | 0 Q499T2 | 0 Q4KM73 | 0 Q0PMD2        | 0 |
| Q32PY2 | 0 Q4FZV0 | 0 Q4QQV8 | 0 Q10758        | 0 |
| Q3KRC4 | 0 Q4KLZ6 | 0 Q4QQW8 | 0 Q1WIM1        | 0 |
| Q3MIE4 | 0 Q4KM73 | 0 Q4TU93 | 0 Q1WIM3        | 0 |
| Q3T1J1 | 0 Q4QQV8 | 0 Q4V8I1 | 0 Q32PY2        | 0 |
| Q3T1J9 | 0 Q4QQW8 | 0 Q4V8K5 | 0 Q3KRC4        | 0 |
| Q3T1K5 | 0 Q4TU93 | 0 Q562C9 | 0 Q3T1J1        | 0 |
| Q3ZAV1 | 0 Q4V8I1 | 0 Q566E6 | 0 Q3T1J9        | 0 |
| Q497B0 | 0 Q4V8K5 | 0 Q568Z6 | 0 Q3ZAV1        | 0 |
| Q498S8 | 0 Q562C9 | 0 Q5BJP3 | 0 Q497B0        | 0 |
| Q499T2 | 0 Q566E6 | 0 Q5BJY9 | 0 Q498D9        | 0 |
| Q4AEF8 | 0 Q568Z6 | 0 Q5BK81 | 0 Q498R7        | 0 |
| Q4FZV0 | 0 Q5BJP3 | 0 Q5EGZ1 | 0 Q499T2        | 0 |
| Q4KLZ6 | 0 Q5BK81 | 0 Q5FVF9 | 0 Q4FZU2        | 0 |

|        |          |          |          |   |
|--------|----------|----------|----------|---|
| Q4KM73 | 0 Q5EGZ1 | 0 Q5FVH2 | 0 Q4FZV0 | 0 |
| Q4QQV8 | 0 Q5FVF9 | 0 Q5FVR0 | 0 Q4G075 | 0 |
| Q4QQW8 | 0 Q5FVH2 | 0 Q5FVR3 | 0 Q4KLZ6 | 0 |
| Q4TU93 | 0 Q5FVR0 | 0 Q5HZW5 | 0 Q4KM73 | 0 |
| Q4V885 | 0 Q5FVR3 | 0 Q5I0D5 | 0 Q4QQV8 | 0 |
| Q4V8I1 | 0 Q5HZV9 | 0 Q5I0D7 | 0 Q4QQW8 | 0 |
| Q4V8K5 | 0 Q5HZW5 | 0 Q5I0E9 | 0 Q4TU93 | 0 |
| Q562C9 | 0 Q5I0D5 | 0 Q5M7T9 | 0 Q4V8I1 | 0 |
| Q568Z6 | 0 Q5I0D7 | 0 Q5M871 | 0 Q4V8K5 | 0 |
| Q5BJP3 | 0 Q5I0E9 | 0 Q5M872 | 0 Q562C9 | 0 |
| Q5BK81 | 0 Q5M7T9 | 0 Q5M876 | 0 Q568Z6 | 0 |
| Q5EGZ1 | 0 Q5M871 | 0 Q5RJL6 | 0 Q5BJY9 | 0 |
| Q5FVF9 | 0 Q5M876 | 0 Q5RJP0 | 0 Q5BK81 | 0 |
| Q5FVH2 | 0 Q5M8C6 | 0 Q5RKH6 | 0 Q5EGZ1 | 0 |
| Q5FVR0 | 0 Q5RJL6 | 0 Q5RKI0 | 0 Q5FVF9 | 0 |
| Q5FVR3 | 0 Q5RJP0 | 0 Q5RKI7 | 0 Q5FVH2 | 0 |
| Q5HZW5 | 0 Q5RKH6 | 0 Q5U2Q3 | 0 Q5FVR0 | 0 |
| Q5I0D5 | 0 Q5RKI0 | 0 Q5U2V4 | 0 Q5FVR3 | 0 |
| Q5I0D7 | 0 Q5RKI7 | 0 Q5U300 | 0 Q5HZW5 | 0 |
| Q5I0E9 | 0 Q5RLM2 | 0 Q5U367 | 0 Q5I0D7 | 0 |
| Q5M7T9 | 0 Q5U2Q3 | 0 Q5XFX0 | 0 Q5I0E9 | 0 |
| Q5M871 | 0 Q5U300 | 0 Q5XI20 | 0 Q5M7T9 | 0 |
| Q5M872 | 0 Q5U367 | 0 Q5XI32 | 0 Q5M872 | 0 |
| Q5M876 | 0 Q5XI20 | 0 Q5XI43 | 0 Q5M876 | 0 |
| Q5RJL6 | 0 Q5XI32 | 0 Q5XI73 | 0 Q5M8C6 | 0 |
| Q5RJP0 | 0 Q5XI43 | 0 Q5XI89 | 0 Q5RJL6 | 0 |
| Q5RKH6 | 0 Q5XI73 | 0 Q5XIE8 | 0 Q5RJP0 | 0 |
| Q5RKI0 | 0 Q5XI89 | 0 Q5Y4N8 | 0 Q5RKH6 | 0 |
| Q5RKI7 | 0 Q5XIE8 | 0 Q62632 | 0 Q5RKI0 | 0 |
| Q5U2Q3 | 0 Q5Y4N8 | 0 Q62635 | 0 Q5RKI7 | 0 |
| Q5U300 | 0 Q5ZQU0 | 0 Q62636 | 0 Q5RLM2 | 0 |
| Q5U367 | 0 Q62632 | 0 Q62638 | 0 Q5U2Q3 | 0 |
| Q5XI20 | 0 Q62638 | 0 Q62740 | 0 Q5U300 | 0 |
| Q5XI32 | 0 Q62687 | 0 Q62745 | 0 Q5U367 | 0 |
| Q5XI43 | 0 Q62740 | 0 Q62786 | 0 Q5XI20 | 0 |
| Q5XI73 | 0 Q62745 | 0 Q62795 | 0 Q5XI32 | 0 |
| Q5XI89 | 0 Q62753 | 0 Q62812 | 0 Q5XI43 | 0 |
| Q5XIE8 | 0 Q62786 | 0 Q62867 | 0 Q5XI89 | 0 |
| Q5Y4N8 | 0 Q62795 | 0 Q62930 | 0 Q5XIE8 | 0 |
| Q5ZQU0 | 0 Q62812 | 0 Q62946 | 0 Q5Y4N8 | 0 |
| Q62632 | 0 Q62867 | 0 Q63041 | 0 Q62632 | 0 |
| Q62638 | 0 Q62930 | 0 Q63072 | 0 Q62638 | 0 |
| Q62740 | 0 Q62946 | 0 Q63083 | 0 Q62687 | 0 |
| Q62745 | 0 Q62975 | 0 Q63150 | 0 Q62745 | 0 |
| Q62753 | 0 Q63041 | 0 Q63203 | 0 Q62786 | 0 |
| Q62786 | 0 Q63072 | 0 Q63257 | 0 Q62795 | 0 |
| Q62795 | 0 Q63083 | 0 Q63270 | 0 Q62812 | 0 |
| Q62812 | 0 Q63150 | 0 Q63416 | 0 Q62867 | 0 |
| Q62867 | 0 Q63257 | 0 Q63424 | 0 Q62930 | 0 |
| Q62930 | 0 Q63270 | 0 Q63474 | 0 Q62946 | 0 |
| Q62946 | 0 Q63416 | 0 Q63475 | 0 Q62997 | 0 |
| Q63041 | 0 Q63424 | 0 Q63515 | 0 Q63041 | 0 |
| Q63072 | 0 Q63474 | 0 Q63530 | 0 Q63083 | 0 |
| Q63083 | 0 Q63493 | 0 Q63598 | 0 Q63203 | 0 |
| Q63150 | 0 Q63514 | 0 Q63610 | 0 Q63257 | 0 |
| Q63203 | 0 Q63515 | 0 Q63621 | 0 Q63270 | 0 |
| Q63257 | 0 Q63530 | 0 Q63678 | 0 Q63424 | 0 |
| Q63270 | 0 Q63610 | 0 Q63691 | 0 Q63474 | 0 |
| Q63416 | 0 Q63618 | 0 Q63716 | 0 Q63493 | 0 |
| Q63467 | 0 Q63621 | 0 Q63772 | 0 Q63515 | 0 |
| Q63474 | 0 Q63678 | 0 Q63797 | 0 Q63530 | 0 |
| Q63514 | 0 Q63691 | 0 Q64093 | 0 Q63556 | 0 |
| Q63515 | 0 Q63716 | 0 Q64119 | 0 Q63610 | 0 |
| Q63530 | 0 Q63772 | 0 Q64194 | 0 Q63618 | 0 |
| Q63556 | 0 Q63797 | 0 Q641X3 | 0 Q63621 | 0 |
| Q63610 | 0 Q64093 | 0 Q641Z6 | 0 Q63678 | 0 |
| Q63621 | 0 Q64119 | 0 Q641Z7 | 0 Q63691 | 0 |
| Q63678 | 0 Q641X3 | 0 Q641Z8 | 0 Q63716 | 0 |

|        |          |          |          |   |
|--------|----------|----------|----------|---|
| Q63691 | 0 Q641Z6 | 0 Q64230 | 0 Q63751 | 0 |
| Q63716 | 0 Q641Z7 | 0 Q64240 | 0 Q63772 | 0 |
| Q63772 | 0 Q641Z8 | 0 Q642A7 | 0 Q63797 | 0 |
| Q63797 | 0 Q64230 | 0 Q64319 | 0 Q64119 | 0 |
| Q64119 | 0 Q64240 | 0 Q64537 | 0 Q64194 | 0 |
| Q641X3 | 0 Q642A7 | 0 Q64573 | 0 Q641X3 | 0 |
| Q641Z6 | 0 Q64319 | 0 Q64602 | 0 Q641Z6 | 0 |
| Q641Z7 | 0 Q64335 | 0 Q64604 | 0 Q641Z7 | 0 |
| Q641Z8 | 0 Q64537 | 0 Q64605 | 0 Q641Z8 | 0 |
| Q64230 | 0 Q64602 | 0 Q64611 | 0 Q64230 | 0 |
| Q64240 | 0 Q64604 | 0 Q64640 | 0 Q64240 | 0 |
| Q64268 | 0 Q64605 | 0 Q66H12 | 0 Q642A7 | 0 |
| Q642A7 | 0 Q64611 | 0 Q66H94 | 0 Q64319 | 0 |
| Q64537 | 0 Q64640 | 0 Q66HD0 | 0 Q64361 | 0 |
| Q64573 | 0 Q66H12 | 0 Q66HG4 | 0 Q64537 | 0 |
| Q64602 | 0 Q66H94 | 0 Q675A5 | 0 Q64573 | 0 |
| Q64604 | 0 Q66HG4 | 0 Q68FP1 | 0 Q64602 | 0 |
| Q64605 | 0 Q675A5 | 0 Q68FQ2 | 0 Q64604 | 0 |
| Q64640 | 0 Q68FP1 | 0 Q68FS4 | 0 Q64640 | 0 |
| Q66H12 | 0 Q68FQ2 | 0 Q68FT5 | 0 Q66H12 | 0 |
| Q66H69 | 0 Q68FS4 | 0 Q68FV8 | 0 Q66H94 | 0 |
| Q66H94 | 0 Q68FT5 | 0 Q6AXR4 | 0 Q66HD0 | 0 |
| Q66HD0 | 0 Q6AXR4 | 0 Q6AXS4 | 0 Q66HG4 | 0 |
| Q66HG4 | 0 Q6AXS4 | 0 Q6AY33 | 0 Q675A5 | 0 |
| Q675A5 | 0 Q6AY41 | 0 Q6AY41 | 0 Q68FP1 | 0 |
| Q68FP1 | 0 Q6AYD4 | 0 Q6AYD4 | 0 Q68FQ2 | 0 |
| Q68FQ2 | 0 Q6AYE5 | 0 Q6AYE5 | 0 Q68FT5 | 0 |
| Q68FT5 | 0 Q6AYP5 | 0 Q6AYP5 | 0 Q6AXR4 | 0 |
| Q6AXR4 | 0 Q6AYR6 | 0 Q6AYR6 | 0 Q6AXS4 | 0 |
| Q6AXS4 | 0 Q6AYS7 | 0 Q6AYR8 | 0 Q6AY33 | 0 |
| Q6AY33 | 0 Q6AYT0 | 0 Q6AYS7 | 0 Q6AY41 | 0 |
| Q6AY41 | 0 Q6B345 | 0 Q6AYT0 | 0 Q6AY61 | 0 |
| Q6AY61 | 0 Q6DGG1 | 0 Q6B345 | 0 Q6AYD4 | 0 |
| Q6AYD4 | 0 Q6GMN2 | 0 Q6BEA2 | 0 Q6AYE5 | 0 |
| Q6AYE5 | 0 Q6IE64 | 0 Q6DGG1 | 0 Q6AYP5 | 0 |
| Q6AYP5 | 0 Q6IFW2 | 0 Q6GMN2 | 0 Q6AYQ8 | 0 |
| Q6AYR6 | 0 Q6IRK9 | 0 Q6IE64 | 0 Q6AYR6 | 0 |
| Q6AYT0 | 0 Q6IUU3 | 0 Q6IFW2 | 0 Q6AYS7 | 0 |
| Q6B345 | 0 Q6JE36 | 0 Q6IRK9 | 0 Q6AYT0 | 0 |
| Q6BEA2 | 0 Q6MG61 | 0 Q6IUU3 | 0 Q6B345 | 0 |
| Q6DGG1 | 0 Q6MG71 | 0 Q6JE36 | 0 Q6DGG1 | 0 |
| Q6IE52 | 0 Q6NX65 | 0 Q6MG61 | 0 Q6IE52 | 0 |
| Q6IE64 | 0 Q6NYB7 | 0 Q6MG71 | 0 Q6IE64 | 0 |
| Q6IFW2 | 0 Q6P6S9 | 0 Q6NYB7 | 0 Q6IFU8 | 0 |
| Q6IRK9 | 0 Q6P6T1 | 0 Q6P6S9 | 0 Q6IFW2 | 0 |
| Q6IUU3 | 0 Q6P6V0 | 0 Q6P6T1 | 0 Q6IG02 | 0 |
| Q6MG61 | 0 Q6P734 | 0 Q6P6V0 | 0 Q6IMF3 | 0 |
| Q6MG71 | 0 Q6P7A9 | 0 Q6P734 | 0 Q6IRK9 | 0 |
| Q6NX65 | 0 Q6P7Q4 | 0 Q6P767 | 0 Q6IUU3 | 0 |
| Q6NYB7 | 0 Q6P7S1 | 0 Q6P7A9 | 0 Q6JE36 | 0 |
| Q6P6S9 | 0 Q6PCU2 | 0 Q6P7Q4 | 0 Q6MG61 | 0 |
| Q6P6T1 | 0 Q6PEC4 | 0 Q6P7S1 | 0 Q6MG71 | 0 |
| Q6P6V0 | 0 Q6Q0N1 | 0 Q6PEC4 | 0 Q6NX65 | 0 |
| Q6P734 | 0 Q6Q7Y5 | 0 Q6Q0N1 | 0 Q6NYB7 | 0 |
| Q6P777 | 0 Q6RUV5 | 0 Q6Q7Y5 | 0 Q6P6Q2 | 0 |
| Q6P7A9 | 0 Q6RY07 | 0 Q6RUV5 | 0 Q6P6S9 | 0 |
| Q6P7Q4 | 0 Q6TUD4 | 0 Q6RY07 | 0 Q6P6V0 | 0 |
| Q6P7S1 | 0 Q6VBQ5 | 0 Q6TUD4 | 0 Q6P734 | 0 |
| Q6PEC4 | 0 Q6X936 | 0 Q6VBQ5 | 0 Q6P767 | 0 |
| Q6Q7Y5 | 0 Q711G3 | 0 Q6X936 | 0 Q6P7A9 | 0 |
| Q6RY07 | 0 Q71UF4 | 0 Q711G3 | 0 Q6P7Q4 | 0 |
| Q6TUD4 | 0 Q76HN1 | 0 Q71MB6 | 0 Q6P7S1 | 0 |
| Q6VBQ5 | 0 Q793F9 | 0 Q76HN1 | 0 Q6PEC4 | 0 |
| Q6X936 | 0 Q794F9 | 0 Q793F9 | 0 Q6Q0N1 | 0 |
| Q711G3 | 0 Q7M0E3 | 0 Q794F9 | 0 Q6RY07 | 0 |
| Q71MB6 | 0 Q7TPB4 | 0 Q7M0E3 | 0 Q6TUD4 | 0 |
| Q71UF4 | 0 Q7TQ94 | 0 Q7TPB1 | 0 Q6VBQ5 | 0 |
| Q76HN1 | 0 Q80W57 | 0 Q7TPB4 | 0 Q6X936 | 0 |

|        |          |          |          |   |
|--------|----------|----------|----------|---|
| Q793F9 | 0 Q80WD0 | 0 Q7TQ94 | 0 Q711G3 | 0 |
| Q794F9 | 0 Q80WD1 | 0 Q80W57 | 0 Q71MB6 | 0 |
| Q7M0E3 | 0 Q80WF4 | 0 Q80WD0 | 0 Q71UF4 | 0 |
| Q7TPB4 | 0 Q80WY6 | 0 Q80WD1 | 0 Q76HN1 | 0 |
| Q7TQ94 | 0 Q80YN4 | 0 Q80WF4 | 0 Q793F9 | 0 |
| Q80WD0 | 0 Q810F4 | 0 Q80YN4 | 0 Q794F9 | 0 |
| Q80WD1 | 0 Q811A3 | 0 Q810F4 | 0 Q7M0E3 | 0 |
| Q80WF4 | 0 Q811M5 | 0 Q811A3 | 0 Q7TPB4 | 0 |
| Q80YN4 | 0 Q811X6 | 0 Q811M5 | 0 Q7TQ94 | 0 |
| Q810F4 | 0 Q812E4 | 0 Q811X6 | 0 Q80W57 | 0 |
| Q811A3 | 0 Q812E9 | 0 Q812E9 | 0 Q80WD0 | 0 |
| Q811M5 | 0 Q8CFN2 | 0 Q8CFN2 | 0 Q80WD1 | 0 |
| Q811X6 | 0 Q8CG08 | 0 Q8CG08 | 0 Q80WF4 | 0 |
| Q812E9 | 0 Q8CG45 | 0 Q8CG45 | 0 Q810F4 | 0 |
| Q8CG08 | 0 Q8CGS4 | 0 Q8CGS4 | 0 Q811A3 | 0 |
| Q8CG45 | 0 Q8CHN3 | 0 Q8CHN3 | 0 Q811M5 | 0 |
| Q8CGS4 | 0 Q8CHN8 | 0 Q8CIZ5 | 0 Q811X6 | 0 |
| Q8CHN3 | 0 Q8JZQ0 | 0 Q8JZQ0 | 0 Q812E9 | 0 |
| Q8CHN8 | 0 Q8K3V3 | 0 Q8K1G0 | 0 Q8CG45 | 0 |
| Q8CIZ5 | 0 Q8R431 | 0 Q8K3V3 | 0 Q8CGS4 | 0 |
| Q8JZQ0 | 0 Q8R491 | 0 Q8R431 | 0 Q8CHN3 | 0 |
| Q8K3V3 | 0 Q8R4E1 | 0 Q8R491 | 0 Q8JZQ0 | 0 |
| Q8N7M5 | 0 Q8R5M3 | 0 Q8R4E1 | 0 Q8K1G0 | 0 |
| Q8R491 | 0 Q8R5M5 | 0 Q8R5M3 | 0 Q8K3V3 | 0 |
| Q8R4E1 | 0 Q8VIF7 | 0 Q8R5M5 | 0 Q8R431 | 0 |
| Q8R5M3 | 0 Q91XN4 | 0 Q8VIF7 | 0 Q8R491 | 0 |
| Q8R5M5 | 0 Q91XT9 | 0 Q91XN4 | 0 Q8R4E1 | 0 |
| Q8VIF7 | 0 Q920A6 | 0 Q91XT9 | 0 Q8R5M3 | 0 |
| Q91XN4 | 0 Q920G2 | 0 Q920A6 | 0 Q8R5M5 | 0 |
| Q91XT9 | 0 Q923M1 | 0 Q923M1 | 0 Q8VIF7 | 0 |
| Q920A6 | 0 Q923S2 | 0 Q923S2 | 0 Q91XT9 | 0 |
| Q920G2 | 0 Q923V8 | 0 Q923V8 | 0 Q920A6 | 0 |
| Q923V8 | 0 Q924C3 | 0 Q924C3 | 0 Q920G2 | 0 |
| Q924C3 | 0 Q99376 | 0 Q99376 | 0 Q923M1 | 0 |
| Q99376 | 0 Q99J86 | 0 Q99J86 | 0 Q923S2 | 0 |
| Q99J86 | 0 Q99M75 | 0 Q99M75 | 0 Q923V8 | 0 |
| Q99M75 | 0 Q99MA2 | 0 Q99MA2 | 0 Q924C3 | 0 |
| Q99MA2 | 0 Q99MF4 | 0 Q99MF4 | 0 Q99J86 | 0 |
| Q99MF4 | 0 Q99PS8 | 0 Q99PP0 | 0 Q99M75 | 0 |
| Q99PS8 | 0 Q99PW3 | 0 Q99PS8 | 0 Q99MA2 | 0 |
| Q99PW3 | 0 Q99PW7 | 0 Q99PW3 | 0 Q99MF4 | 0 |
| Q99PW7 | 0 Q9EPB1 | 0 Q99PW7 | 0 Q99PS8 | 0 |
| Q9EPF2 | 0 Q9EPF2 | 0 Q9EPB1 | 0 Q99PW3 | 0 |
| Q9EQV6 | 0 Q9EQS0 | 0 Q9EPF2 | 0 Q99PW7 | 0 |
| Q9EQX9 | 0 Q9EQV6 | 0 Q9EQS0 | 0 Q9EPB1 | 0 |
| Q9ERA7 | 0 Q9EQX9 | 0 Q9EQX9 | 0 Q9EPF2 | 0 |
| Q9ES87 | 0 Q9ERA7 | 0 Q9ERA7 | 0 Q9EQS0 | 0 |
| Q9ESG3 | 0 Q9ES87 | 0 Q9ES87 | 0 Q9EQV9 | 0 |
| Q9ESS6 | 0 Q9ESG3 | 0 Q9ESG3 | 0 Q9EQX9 | 0 |
| Q9JHW1 | 0 Q9ESS6 | 0 Q9ESS6 | 0 Q9ERA7 | 0 |
| Q9JHY1 | 0 Q9JHB9 | 0 Q9JHW1 | 0 Q9ES87 | 0 |
| Q9JI92 | 0 Q9JHW1 | 0 Q9JHY1 | 0 Q9ESG3 | 0 |
| Q9JID2 | 0 Q9JHY1 | 0 Q9JI92 | 0 Q9ESS6 | 0 |
| Q9JIK1 | 0 Q9JI92 | 0 Q9JIK1 | 0 Q9JHW1 | 0 |
| Q9JJ19 | 0 Q9JIK1 | 0 Q9JJ19 | 0 Q9JHY1 | 0 |
| Q9JJ22 | 0 Q9JJ19 | 0 Q9JJ40 | 0 Q9JI92 | 0 |
| Q9JJ40 | 0 Q9JJ22 | 0 Q9JJ50 | 0 Q9JIK1 | 0 |
| Q9JJ73 | 0 Q9JJ40 | 0 Q9JJ73 | 0 Q9JJ19 | 0 |
| Q9JLJ3 | 0 Q9JJ73 | 0 Q9JJS8 | 0 Q9JJ22 | 0 |
| Q9JLS4 | 0 Q9JLJ3 | 0 Q9JLJ3 | 0 Q9JJ40 | 0 |
| Q9QW30 | 0 Q9JLS4 | 0 Q9QW30 | 0 Q9JJ50 | 0 |
| Q9QWJ9 | 0 Q9QW30 | 0 Q9QY17 | 0 Q9JJ73 | 0 |
| Q9QXQ0 | 0 Q9QWJ9 | 0 Q9QYU4 | 0 Q9JLJ3 | 0 |
| Q9QY17 | 0 Q9QXQ0 | 0 Q9QZ76 | 0 Q9JLS4 | 0 |
| Q9QZ76 | 0 Q9QY17 | 0 Q9QZA2 | 0 Q9QW30 | 0 |
| Q9QZA2 | 0 Q9QYU4 | 0 Q9QZH0 | 0 Q9QWJ9 | 0 |
| Q9QZH0 | 0 Q9QZ76 | 0 Q9QZK8 | 0 Q9QY17 | 0 |
| Q9QZQ5 | 0 Q9QZA2 | 0 Q9R044 | 0 Q9QYU4 | 0 |

|        |          |          |          |   |
|--------|----------|----------|----------|---|
| Q9R044 | 0 Q9QZH0 | 0 Q9R063 | 0 Q9QZA2 | 0 |
| Q9R063 | 0 Q9QZK8 | 0 Q9R066 | 0 Q9QZH0 | 0 |
| Q9R066 | 0 Q9R063 | 0 Q9R0D6 | 0 Q9QZK8 | 0 |
| Q9R0D6 | 0 Q9R066 | 0 Q9R0J8 | 0 Q9R063 | 0 |
| Q9R0J8 | 0 Q9R0D6 | 0 Q9R0T4 | 0 Q9R066 | 0 |
| Q9R0T4 | 0 Q9R0J8 | 0 Q9R141 | 0 Q9R0D6 | 0 |
| Q9R141 | 0 Q9R0T4 | 0 Q9R1T1 | 0 Q9R0J8 | 0 |
| Q9R1T3 | 0 Q9R141 | 0 Q9R1T3 | 0 Q9R0T3 | 0 |
| Q9R1T5 | 0 Q9R1T3 | 0 Q9R1T5 | 0 Q9R0T4 | 0 |
| Q9WTQ2 | 0 Q9R1T5 | 0 Q9WTQ2 | 0 Q9R141 | 0 |
| Q9WTW7 | 0 Q9WTQ2 | 0 Q9WUC4 | 0 Q9R1T1 | 0 |
| Q9WUC4 | 0 Q9WTW7 | 0 Q9WUD9 | 0 Q9R1T3 | 0 |
| Q9WUD9 | 0 Q9WUC4 | 0 Q9WUF4 | 0 Q9WTQ2 | 0 |
| Q9WUF4 | 0 Q9WUD9 | 0 Q9WUK5 | 0 Q9WTW7 | 0 |
| Q9WUK5 | 0 Q9WUK5 | 0 Q9WUW3 | 0 Q9WUK5 | 0 |
| Q9WUW3 | 0 Q9WUW3 | 0 Q9WUW8 | 0 Q9WUW8 | 0 |
| Q9WUW9 | 0 Q9WUW8 | 0 Q9WUW9 | 0 Q9WUW9 | 0 |
| Q9WVH8 | 0 Q9WUW9 | 0 Q9WVH8 | 0 Q9WVH8 | 0 |
| Q9Z0J6 | 0 Q9WVH8 | 0 Q9Z0J6 | 0 Q9Z0J6 | 0 |
| Q9Z0T0 | 0 Q9Z0T0 | 0 Q9Z0T0 | 0 Q9Z0T0 | 0 |
| Q9Z0W7 | 0 Q9Z0W7 | 0 Q9Z0W7 | 0 Q9Z0W7 | 0 |
| Q9Z1Y3 | 0 Q9Z1Y3 | 0 Q9Z1Y3 | 0 Q9Z1Y3 | 0 |
| Q9Z2Y9 | 0 Q9Z2Y9 | 0 Q9Z2Y9 | 0 Q9Z2Y9 | 0 |
| Q9Z339 | 0 Q9Z339 | 0 Q9Z339 | 0 Q9Z339 | 0 |
