# Supplementary material for: Dynamic Changes of Urine Proteome in Rat Models Inoculated with Two Different Hepatoma Cell Lines
Source: Hindawi journal article supplement (doi:10.1155/2021/8895330), 2021-01-07
Supplement: f1 [file 8895330.f1.zip]

Title: Dynamic changes of urine proteome in rat models inoculated with two different hepatoma cell lines. Full author: Yameng Zhang, Yufei Gao, Jing Wei & Youhe  
Table S3 The details of 6435 random allocations in CBRH-7919 model.

Day 5

| Random allocation | Group1           | Group2                 | Numbers of differential urinary proteins | Differential protein ID                                                                                                                                                                                                                                                                                                                                                                                                                                                                                                                                                                                                                                                                                                                                                                                                                                                                                                                                                          |
|-------------------|------------------|------------------------|------------------------------------------|----------------------------------------------------------------------------------------------------------------------------------------------------------------------------------------------------------------------------------------------------------------------------------------------------------------------------------------------------------------------------------------------------------------------------------------------------------------------------------------------------------------------------------------------------------------------------------------------------------------------------------------------------------------------------------------------------------------------------------------------------------------------------------------------------------------------------------------------------------------------------------------------------------------------------------------------------------------------------------|
| 1                 | 1,2,3,4,5,6,7,8  | 9,10,11,12,13,14,15,16 | 132                                      | A2RUW1,B0BNA5,B0LT89,B1H234,D3ZHA0,D4A5U3,O08557,O35244,O35763,O55004,O70257,O70377,O70594,O88339;Q4V882,P00774,P00884,P01681,P01836,P02631,P02780,P02781,P04904,P05371,P06760,P06761,P06911,P07647,P08649,P08721,P08937,P10247,P13432,P15399,P18418,P18757,P19112,P19223,P19468,P19629,P20646,P20760,P20761,P20762,P22282,P23928,P24268,P29975,P30904,P31044,P31430,P36860,P38438,P38918,P46720,P46844,P48037,P48508,P50115,P50116,P50280,P52590,P52847,P53790,P55091,P57113,P60711;P63259,P63081,P68035;P68136,P80299,P97580,P98089,Q03248,Q05175,Q05702,Q30KJ2,Q3T1J9,Q3ZAV1,Q4G063,Q4G075,Q4KLZ6,Q5GRG2,Q5I0D7,Q5I0E9,Q5M7T9,Q5M8C6,Q5QE79,Q5RKI0,Q5RLM2,Q5U2Q3,Q5U2V4,Q62635,Q62714,Q62812,Q62946,Q63270,Q63317,Q63424,Q63618,Q63751,Q64602,Q66H69,Q66HG3,Q6AYS7,Q6AYT0,Q6IG05,Q6MG61,Q6PCU2,Q6Q0N0,Q6Q0N1,Q6TMA8,Q71MB6,Q80W57,Q8CIZ5,Q8R431,Q8R5M3,Q91ZS3,Q920G2,Q923S2,Q99MZ8,Q9JI85,Q9JJ19,Q9JJ40,Q9JLJ3,Q9QX74,Q9QYU4,Q9QZK8,Q9R0T3,Q9WTW7,Q9WUW8,Q9WUW9,Q9Z0V6,Q9Z0W7 |
| 2                 | 1,2,3,4,5,6,7,9  | 8,10,11,12,13,14,15,16 | 18                                       | B1H234,O70594,P08649,P08721,P18418,P19223,P23928,P36860,P50116,P52590,P55091,P80299,Q09030,Q4KLZ6,Q5QE79,Q63317,Q6TMA8,Q9R0T3                                                                                                                                                                                                                                                                                                                                                                                                                                                                                                                                                                                                                                                                                                                                                                                                                                                    |
| 3                 | 1,2,3,4,5,6,7,10 | 8,9,11,12,13,14,15,16  | 79                                       | A2RUW1,B0LT89,B1H234,O08557,O35763,O70377,O70594,O88339;Q4V882,P01836,P04904,P08721,P10536,P10760,P17988,P18297,P18418,P18757,P19223,P19468,P23928,P29975,P30904,P36860,P38918,P46844,P48037,P48508,P50116,P51907,P52590,P52847,P53790,P54921,P55091,P57113,P60711;P63259,P62630,P68035;P68136,P80299,Q03248,Q05175,Q3T1J9,Q3ZAV1,Q4KLZ6,Q5I0D7,Q5I0E9,Q5M7T9,Q5RKI0,Q5RLM2,Q63270,Q63317,Q63355,Q63424,Q63618,Q64602,Q66HG3,Q68FT5,Q6AYS7,Q6MG61,Q6P6T4,Q6Q0N1,Q6TMA8,Q71MB6,Q7M0E3,Q80W57,Q8K3P7,Q8R431,Q8VI04,Q923S2,Q99MZ8,Q9JJ19,Q9JJ40,Q9JLJ3,Q9QYU4,Q9R0T3,Q9WTW7,Q9WUW8,Q9WUW9,Q9Z0W7                                                                                                                                                                                                                                                                                                                                                                                    |
| 4                 | 1,2,3,4,5,6,7,11 | 8,9,10,12,13,14,15,16  | 32                                       | B1H234,O08557,P01039,P02780,P02781,P07647,P08649,P08721,P11598,P17988,P18418,P19223,P22283,P31430,P36860,P47967,P48037,P50116,P52590,P55091,P70619,P80299,P97840,Q4KLZ6,Q5GRG2,Q63317,Q63493,Q63617,Q6TMA8,Q8R5M3,Q9JI85,Q9R0T3                                                                                                                                                                                                                                                                                                                                                                                                                                                                                                                                                                                                                                                                                                                                                  |
| 5                 | 1,2,3,4,5,6,7,12 | 8,9,10,11,13,14,15,16  | 29                                       | B0LT89,B1H234,O08557,P08721,P11762,P19223,P19814,P30904,P31430,P36860,P46844,P47967,P48508,P50116,P52590,P55091,P80299,P97840,Q4KLZ6,Q5I0D7,Q5RLM2,Q63270,Q63317,Q66HG3,Q6Q0N1,Q6TMA8,Q9QYU4,Q9R0T3,Q9WUW8                                                                                                                                                                                                                                                                                                                                                                                                                                                                                                                                                                                                                                                                                                                                                                       |
| 6                 | 1,2,3,4,5,6,7,13 | 8,9,10,11,12,14,15,16  | 28                                       | A2RUW1,B1H234,O08557,O70594,P01836,P02761,P08649,P08721,P19223,P36860,P46844,P47967,P48508,P50116,P52590,P55091,P63081,P80299,P97840,Q4KLZ6,Q5I0D7,Q62714,Q63317,Q63618,Q6Q0N1,Q6TMA8,Q9R0T3,Q9WUW8                                                                                                                                                                                                                                                                                                                                                                                                                                                                                                                                                                                                                                                                                                                                                                              |
| 7                 | 1,2,3,4,5,6,7,14 | 8,9,10,11,12,13,15,16  | 33                                       | A2RUW1,B0LT89,B1H234,O08557,O70594,P02761,P08649,P08721,P19223,P23928,P46844,P48037,P48508,P50116,P52590,P55091,P57113,P63081,P80299,Q4KLZ6,Q5I0D7,Q5QE79,Q5RLM2,Q62714,Q62812,Q63317,Q63751,Q64602,Q6TMA8,Q71MB6,Q9R0T3,Q9WUW8,Q9WUW9                                                                                                                                                                                                                                                                                                                                                                                                                                                                                                                                                                                                                                                                                                                                           |

|    |                      |                                |    |                                                                                                                                                                                                                                                                                                                                                                                                                                                                                                                                                                          |
|----|----------------------|--------------------------------|----|--------------------------------------------------------------------------------------------------------------------------------------------------------------------------------------------------------------------------------------------------------------------------------------------------------------------------------------------------------------------------------------------------------------------------------------------------------------------------------------------------------------------------------------------------------------------------|
| 8  | 1,2,3,4,5,6<br>,7,15 | 8,9,10,11,<br>12,13,14,1<br>6  | 49 | A2RUW1,B0LT89,B1H234,O08557,O70594,O88339;Q4V882,P01946,P02091,P08649,P08721,P17988,P18297,P18757,P19223,P19468,P23928,P30904,P36860,P38918,P46844,P48508,P50116,P52590,P53790,P55091,P70619,P80299,Q03248,Q4KLZ6,Q5I0D7,Q5I0E9,Q5M7T9,Q62714,Q62812,Q63270,Q63317,Q63618,Q64602,Q6MG61,Q6PCU2,Q6Q0N1,Q6TMA8,Q71MB6,Q7M0E3,Q8K3P7,Q99MZ8,Q9QYU4,Q9WUW8,Q9Z0W7                                                                                                                                                                                                            |
| 9  | 1,2,3,4,5,6<br>,7,16 | 8,9,10,11,<br>12,13,14,1<br>5  | 63 | B0LT89,B1H234,O08557,O70594,P01836,P02761,P02783,P04904,P07647,P08649,P08721,P17988,P18297,P18418,P18757,P19223,P19468,P23928,P29975,P36860,P36970,P38918,P46844,P48037,P48508,P50116,P52590,P52847,P53790,P55091,P57113,P80299,Q03248,Q3ZAV1,Q4KLZ6,Q5I0D7,Q5I0E9,Q5M7T9,Q5RLM2,Q5U2Q3,Q62812,Q63270,Q63317,Q63424,Q63618,Q64602,Q68FT5,Q6MG61,Q6Q0N1,Q6TMA8,Q71MB6,Q80W57,Q8R431,Q8R5M3,Q923S2,Q9JJ40,Q9JLJ3,Q9QYU4,Q9R0T3,Q9WTW7,Q9WUW8,Q9WUW9,Q9Z0W7                                                                                                                 |
| 10 | 1,2,3,4,5,6<br>,8,9  | 7,10,11,12<br>,13,14,15,<br>16 | 22 | B1H234,D4A5U3,O70594,P00774,P01681,P08937,P10247,P18418,P19223,P20760,P20761,P31430,P36860,P52590,P55091,P97580,Q05702,Q09030,Q30KJ2,Q4KLZ6,Q63317,Q8CIZ5                                                                                                                                                                                                                                                                                                                                                                                                                |
| 11 | 1,2,3,4,5,6<br>,8,10 | 7,9,11,12,<br>13,14,15,1<br>6  | 76 | A2RUW1,O08557,O35763,O55004,O70257,O70377,O70594,O88267,O88339;Q4V882,P01681,P01836,P02631,P05371,P08937,P10247,P15399,P18418,P18757,P19223,P19468,P19629,P20760,P20761,P20762,P23928,P25031,P30904,P31430,P35952,P36860,P38918,P46844,P48037,P48508,P52590,P53790,P54921,P55091,P57113,P60711;P63259,P68035;P68136,P97580,P98089,Q03248,Q05175,Q05702,Q30KJ2,Q3T1J9,Q3ZAV1,Q498D9,Q4KLZ6,Q5I0E9,Q5M7T9,Q5RLM2,Q63270,Q63317,Q63424,Q63618,Q64602,Q66HG3,Q6MG61,Q6PCU2,Q6Q0N1,Q71MB6,Q80W57,Q8CIZ5,Q8R431,Q923S2,Q9JJ19,Q9JJ40,Q9JLJ3,Q9QYU4,Q9WTW7,Q9WUW8,Q9WUW9,Q9Z0W7 |
| 12 | 1,2,3,4,5,6<br>,8,11 | 7,9,10,12,<br>13,14,15,1<br>6  | 43 | B1H234,D4A5U3,P00774,P01681,P02780,P02781,P06911,P07647,P08649,P08937,P10247,P12020,P15399,P18418,P19223,P20760,P20761,P22282,P31430,P40241,P50280,P52590,P55091,P63029,P97580,P98089,Q05702,Q10758,Q30KJ2,Q4FZU2,Q4KLZ6,Q5GRG2,Q63493,Q6IFU7,Q6IFU8,Q6IFW6,Q6IG02,Q6IG05,Q6IMF3,Q6P6Q2,Q8CIZ5,Q9JI85,Q9R0T3                                                                                                                                                                                                                                                             |
| 13 | 1,2,3,4,5,6<br>,8,12 | 7,9,10,11,<br>13,14,15,1<br>6  | 32 | P00774,P01681,P06911,P08937,P10247,P11762,P18418,P19223,P19814,P20760,P30904,P31430,P36860,P46844,P48508,P52590,P55091,P97580,P98089,Q05702,Q30KJ2,Q498D9,Q4KLZ6,Q5I0D7,Q5RLM2,Q63270,Q63317,Q66HG3,Q6IG05,Q6Q0N1,Q8CIZ5,Q9JI85                                                                                                                                                                                                                                                                                                                                          |
| 14 | 1,2,3,4,5,6<br>,8,13 | 7,9,10,11,<br>12,14,15,1<br>6  | 35 | B1H234,D4A5U3,O55004,O70257,O70594,P00774,P08937,P10247,P15399,P18418,P19223,P20760,P20761,P31430,P36860,P46844,P48508,P52590,P55091,P97580,P98089,Q05702,Q30KJ2,Q498D9,Q4KLZ6,Q5I0D7,Q62714,Q63317,Q63618,Q6PCU2,Q6Q0N1,Q6TMA8,Q8CIZ5,Q9JI85,Q9WUW8                                                                                                                                                                                                                                                                                                                     |
| 15 | 1,2,3,4,5,6<br>,8,14 | 7,9,10,11,<br>12,13,15,1<br>6  | 35 | B1H234,D3ZHA0,D4A5U3,O70594,P01681,P08937,P10247,P15399,P18418,P19223,P20760,P20761,P20762,P31430,P46844,P48037,P48508,P50280,P52590,P54921,P55091,P97580,P98089,Q05702,Q30KJ2,Q4KLZ6,Q5RLM2,Q62635,Q62714,Q63317,Q63751,Q6PCU2,Q6TMA8,Q8CIZ5,Q9WUW8                                                                                                                                                                                                                                                                                                                     |
| 16 | 1,2,3,4,5,6<br>,8,15 | 7,9,10,11,<br>12,13,14,1<br>6  | 48 | O08557,O70377,O70594,O88339;Q4V882,P00774,P01681,P01946,P02091,P10247,P15399,P18418,P19132,P19223,P19629,P20760,P20761,P20762,P30904,P31430,P36860,P38918,P46844,P48508,P50280,P52590,P53790,P54921,P55091,P97580,P98089,Q05702,Q30KJ2,Q498D9,Q4KLZ6,Q5I0D7,Q62714,Q63270,Q63317,Q63618,Q6IFU7,Q6IG05,Q6MG61,Q6PCU2,Q6Q0N1,Q6TMA8,Q8CGS4,Q8CIZ5,Q9WUW8                                                                                                                                                                                                                   |

|    |                       |                               |    |                                                                                                                                                                                                                                                                                                                                                                                                                |
|----|-----------------------|-------------------------------|----|----------------------------------------------------------------------------------------------------------------------------------------------------------------------------------------------------------------------------------------------------------------------------------------------------------------------------------------------------------------------------------------------------------------|
| 17 | 1,2,3,4,5,6<br>,8,16  | 7,9,10,11,<br>12,13,14,1<br>5 | 55 | B1H234,D4A5U3,O55004,O70377,O70594,P00774,P02781,P02783,P07151,P07647,P10247,P15399,P18418,P18757,P19223,P19468,P20760,P20761,P20762,P23928,P38652,P38918,P46844,P48037,P48508,P50280,P52590,P52847,P53790,P55091,P97580,Q05702,Q30KJ2,Q3ZAV1,Q4KLZ6,Q5I0D7,Q5M7T9,Q5U2Q3,Q62761;Q62762;Q62763,Q63270,Q63317,Q63618,Q64602,Q6IG05,Q6MG61,Q6Q0N1,Q6TMA8,Q71MB6,Q8CIZ5,Q8R431,Q923S2,Q9JI85,Q9WUW8,Q9WUW9,Q9Z0W7 |
| 18 | 1,2,3,4,5,6<br>,9,10  | 7,8,11,12,<br>13,14,15,1<br>6 | 8  | O70594,P36860,P52590,Q06000,Q09030,Q4KLZ6,Q63618,Q811M5                                                                                                                                                                                                                                                                                                                                                        |
| 19 | 1,2,3,4,5,6<br>,9,11  | 7,8,10,12,<br>13,14,15,1<br>6 | 3  | B1H234,P52590,Q4KLZ6                                                                                                                                                                                                                                                                                                                                                                                           |
| 20 | 1,2,3,4,5,6<br>,9,12  | 7,8,10,11,<br>13,14,15,1<br>6 | 5  | P36860,P52590,Q03191,Q09030,Q4KLZ6                                                                                                                                                                                                                                                                                                                                                                             |
| 21 | 1,2,3,4,5,6<br>,9,13  | 7,8,10,11,<br>12,14,15,1<br>6 | 5  | B1H234,P36860,P52590,Q09030,Q4KLZ6                                                                                                                                                                                                                                                                                                                                                                             |
| 22 | 1,2,3,4,5,6<br>,9,14  | 7,8,10,11,<br>12,13,15,1<br>6 | 5  | B1H234,P52590,Q09030,Q4KLZ6,Q63751                                                                                                                                                                                                                                                                                                                                                                             |
| 23 | 1,2,3,4,5,6<br>,9,15  | 7,8,10,11,<br>12,13,14,1<br>6 | 6  | P01946,P02091,P36860,P52590,P62804,Q4KLZ6                                                                                                                                                                                                                                                                                                                                                                      |
| 24 | 1,2,3,4,5,6<br>,9,16  | 7,8,10,11,<br>12,13,14,1<br>5 | 8  | B1H234,P02783,P22006,P23593,P52590,Q09030,Q498R7,Q4KLZ6                                                                                                                                                                                                                                                                                                                                                        |
| 25 | 1,2,3,4,5,6<br>,10,11 | 7,8,9,12,1<br>3,14,15,16      | 5  | B1H234,P36860,P48037,P52590,Q4KLZ6                                                                                                                                                                                                                                                                                                                                                                             |
| 26 | 1,2,3,4,5,6<br>,10,12 | 7,8,9,11,1<br>3,14,15,16      | 9  | P11762,P36860,P48508,P52590,Q498D9,Q4KLZ6,Q5RLM2,Q63618,Q66HG3                                                                                                                                                                                                                                                                                                                                                 |
| 27 | 1,2,3,4,5,6<br>,10,13 | 7,8,9,11,1<br>2,14,15,16      | 14 | A2RUW1,B1H234,O70594,P36860,P46844,P48508,P52590,P80299,P97584,Q06000,Q498D9,Q4KLZ6,Q63618,Q9WUW8                                                                                                                                                                                                                                                                                                              |
| 28 | 1,2,3,4,5,6<br>,10,14 | 7,8,9,11,1<br>2,13,15,16      | 12 | A2RUW1,B1H234,O70594,P48037,P48508,P52590,P54921,Q06000,Q4KLZ6,Q5RLM2,Q71MB6,Q9WUW8                                                                                                                                                                                                                                                                                                                            |
| 29 | 1,2,3,4,5,6<br>,10,15 | 7,8,9,11,1<br>2,13,14,16      | 26 | A2RUW1,O08557,O70594,O88339,Q4V882,P01946,P02091,P17988,P19468,P21674,P23928,P36860,P38918,P46844,P48508,P52590,P53790,P54921,Q498D9,Q4KLZ6,Q5I0E9,Q63270,Q63618,Q6MG61,Q6Q0N1,Q71MB6,Q812E4                                                                                                                                                                                                                   |
| 30 | 1,2,3,4,5,6<br>,10,16 | 7,8,9,11,1<br>2,13,14,15      | 30 | O70594,P02783,P17988,P18297,P19468,P23928,P46844,P48037,P48508,P52590,P53790,P57113,Q03248,Q3ZAV1,Q4KLZ6,Q5I0D7,Q5I0E9,Q63270,Q63424,Q63618,Q64602,Q6MG61,Q6Q0N1,Q71MB6,Q8R431,Q923S2,Q9JJ40,Q9QYU4,Q9WUW8,Q9Z0W7                                                                                                                                                                                              |

|    |                       |                          |    |                                                                                                                                                                                              |
|----|-----------------------|--------------------------|----|----------------------------------------------------------------------------------------------------------------------------------------------------------------------------------------------|
| 31 | 1,2,3,4,5,6<br>,11,12 | 7,8,9,10,1<br>3,14,15,16 | 6  | B1H234,P11762,P31430,P47967,P52590,Q4KLZ6                                                                                                                                                    |
| 32 | 1,2,3,4,5,6<br>,11,13 | 7,8,9,10,1<br>2,14,15,16 | 4  | B1H234,P36860,P52590,Q4KLZ6                                                                                                                                                                  |
| 33 | 1,2,3,4,5,6<br>,11,14 | 7,8,9,10,1<br>2,13,15,16 | 3  | B1H234,P52590,Q4KLZ6                                                                                                                                                                         |
| 34 | 1,2,3,4,5,6<br>,11,15 | 7,8,9,10,1<br>2,13,14,16 | 14 | B1H234,P01946,P02091,P08721,P17988,P21674,P52590,Q4FZU2,Q4KLZ6,Q6IFU8,Q6IFW6,Q6IG02,Q6IMF3,Q6P6Q2                                                                                            |
| 35 | 1,2,3,4,5,6<br>,11,16 | 7,8,9,10,1<br>2,13,14,15 | 9  | B1H234,P01039,P02783,P07647,P17988,P35745,P52590,Q4KLZ6,Q5I0D7                                                                                                                               |
| 36 | 1,2,3,4,5,6<br>,12,13 | 7,8,9,10,1<br>1,14,15,16 | 5  | P36860,P47967,P52590,P80299,Q4KLZ6                                                                                                                                                           |
| 37 | 1,2,3,4,5,6<br>,12,14 | 7,8,9,10,1<br>1,13,15,16 | 4  | P11762,P52590,Q4KLZ6,Q5RLM2                                                                                                                                                                  |
| 38 | 1,2,3,4,5,6<br>,12,15 | 7,8,9,10,1<br>1,13,14,16 | 7  | P01946,P02091,P11762,P36860,P52590,Q498D9,Q4KLZ6                                                                                                                                             |
| 39 | 1,2,3,4,5,6<br>,12,16 | 7,8,9,10,1<br>1,13,14,15 | 4  | P02783,P52590,Q4KLZ6,Q5I0D7                                                                                                                                                                  |
| 40 | 1,2,3,4,5,6<br>,13,14 | 7,8,9,10,1<br>1,12,15,16 | 5  | A2RUW1,B1H234,P52590,Q4KLZ6,Q9WUW8                                                                                                                                                           |
| 41 | 1,2,3,4,5,6<br>,13,15 | 7,8,9,10,1<br>1,12,14,16 | 11 | A2RUW1,B1H234,P01946,P02091,P21674,P36860,P52590,P62804,P97584,Q498D9,Q4KLZ6                                                                                                                 |
| 42 | 1,2,3,4,5,6<br>,13,16 | 7,8,9,10,1<br>1,12,14,15 | 9  | B1H234,P02783,P46844,P52590,P97584,Q4KLZ6,Q5I0D7,Q9EQS0,Q9WUW8                                                                                                                               |
| 43 | 1,2,3,4,5,6<br>,14,15 | 7,8,9,10,1<br>1,12,13,16 | 8  | A2RUW1,B1H234,P01946,P02091,P52590,P54921,Q4KLZ6,Q62714                                                                                                                                      |
| 44 | 1,2,3,4,5,6<br>,14,16 | 7,8,9,10,1<br>1,12,13,15 | 8  | B1H234,P02783,P48037,P52590,Q4KLZ6,Q5I0D7,Q71MB6,Q9WUW8                                                                                                                                      |
| 45 | 1,2,3,4,5,6<br>,15,16 | 7,8,9,10,1<br>6,10,11,12 | 15 | B0LT89,B1H234,O70594,P01946,P02091,P02783,P17988,P46844,P48508,P52590,P97584,Q4KLZ6,Q5I0D7,Q63270,Q71MB6                                                                                     |
| 46 | 1,2,3,4,5,7<br>,8,9   | ,13,14,15,<br>16         | 27 | D3ZHA0,D4A5U3,O70594,P00774,P01681,P01836,P06760,P08649,P08937,P19223,P20646,P20760,P20761,P48508,Q4FZU6,Q5QE79,Q5U2V4,Q62946,Q63317,Q63618,Q66H69,Q6Q0N1,Q6TMA8,Q8CIZ5,Q9QX74,Q9WUW8,Q9Z0V6 |

47 1,2,3,4,5,7 6,9,11,12,  
,8,10 13,14,15,1  
6

48 1,2,3,4,5,7 6,9,10,12,  
,8,11 13,14,15,1  
6

49 1,2,3,4,5,7 6,9,10,11,  
,8,12 13,14,15,1  
6

50 1,2,3,4,5,7 6,9,10,11,  
,8,13 12,14,15,1  
6

51 1,2,3,4,5,7 6,9,10,11,  
,8,14 12,13,15,1  
6

52 1,2,3,4,5,7 6,9,10,11,  
,8,15 12,13,14,1  
6

53 1,2,3,4,5,7 6,9,10,11,  
,8,16 12,13,14,1  
5

D3ZHA0,D4A5U3,O08557,O35763,O55004,O70257,O70377,O70594,O88339;Q4V882,P00774,P01681,P01836,P04904,P06760,P08937,P10536,P10760,P18418,P18757,P19223,P19468,P20646,P20760,P20761,P20762,P23928,P24268,P29975,P30904,P36860,P38918,P46413,P46720,P46844,P48508,P51907,P53790,P54921,P55091,P57113,P60711;P63259,P62630,P68035;P68136,P8029  
90 9,P97580,Q03248,Q05175,Q30KJ2,Q3T1J9,Q3ZAV1,Q4G075,Q5I0E9,Q5M7T9,Q5RLM2,Q62687,Q62753,Q62946,Q63270,Q63317,Q63355,Q63424,Q63598,Q63618,Q64093,Q64319,Q64602,Q66H69,Q66HG3,Q6AY41,Q6AYS7,Q6MG61,Q6PCU2,Q6Q0N1,Q6TMA8,Q71MB6,Q80W57,Q8CIZ5,Q8R431,Q923S2,Q99MZ8,Q9JJ19,Q9JJ40,Q9JLJ3,Q9QX74,Q9QYU4,Q9WTW7,Q9WUW8,Q9WUW9,Q9Z0V6,Q9Z0W7  
D3ZHA0,D4A5U3,P00774,P01681,P02780,P02781,P02782,P06760,P08649,P08723,P08937,P19223,P20646,P20760,P20761,P22282,P27590,P30904,P31430,P40241,P47967,P50115,P50280,P97840,Q10758,Q4FZU2,Q4G075,Q4KLZ6,Q5M8C6,Q62946,Q63317,Q63493,Q66H69,Q6B345,Q6IFU7,Q6IFU8,Q6IFW6,Q6IG02,Q6IG05,Q6IMF3,Q6P6Q2,Q6TMA8,Q8CIZ5,Q9JHB9,Q9QX74,Q9ROT3,Q9WTT6,Q9WUW8,Q9Z0V6  
D3ZHA0,D4A5U3,iRT-  
34 Kit\_WR\_fusion,P00774,P01681,P01836,P06760,P08649,P19223,P20646,P20760,P20761,P30904,P46844,P47967,P48508,P80299,P97840,P98089,Q4G075,Q5PQL7,Q5RLM2,Q62946,Q63270,Q63317,Q63618,Q66H69,Q6IG05,Q6MG61,Q6Q0N1,Q6TMA8,Q8CIZ5,Q9QX74,Q9WUW8  
B0BNN3,D3ZHA0,D4A5U3,O70257,O70594,P00774,P01681,P01836,P06760,P08649,P19223,P19468,P20646,P20760,P20761,P25809,P30904,P36860,P46844,P47967,P48508,P80299,P97840,Q4G075,Q62714,Q62946,Q63317,Q63618,Q66H69,Q6PCU2,Q6Q0N1,Q6TMA8,Q8CIZ5,Q9QX74,Q9WUW8,Q9WUW9,Q9Z0W7  
37 B0BNN3,BOLT89,D3ZHA0,D4A5U3,O70594,P01681,P06760,P08649,P08937,P19223,P20646,P20760,P20761,P20762,P46844,P48508,P97580,Q4G075,Q5QE79,Q5RLM2,Q62635,Q62714,Q62946,Q63317,Q63751,Q64602,Q66H69,Q6PCU2,Q6Q0N1,Q6TMA8,Q8CIZ5,Q923S2,Q9QX74,Q9WUW8,Q9WUW9  
35 BOLT89,D3ZHA0,D4A5U3,O08557,O35763,O70377,O70594,O88339;Q4V882,P00774,P01681,P06760,P08649,P08721,P18757,P19132,P19223,P19468,P20646,P20760,P20761,P20762,P30904,P36860,P38918,P46844,P48508,P53790,Q05175,Q3ZAV1,Q4G075,Q5I0E9,Q5M7T9,Q5RLM2,Q62714,Q63270,Q63317,Q63355,Q63424,Q63618,Q64093,Q64602,Q66H69,Q6IG05,Q6MG61,Q6PCU2,Q6Q0N1,Q6TMA8,Q80W57,Q8CIZ5,Q8R431,Q923S2,Q99MZ8,Q9JJ19,Q9QX74,Q9WTW7,Q9WUW8,Q9Z0V6,Q9Z0W7  
58 B0BNN3,BOLT89,D3ZHA0,D4A5U3,O35763,O70377,O70594,P00774,P01681,P01836,P02761,P02781,P04904,P06760,P07151,P07647,P08649,P18757,P19223,P19468,P20646,P20760,P20761,P20762,P23928,P38918,P46720,P46844,P48508,P53790,P57113,P97580,Q03248,Q05175,Q30KJ2,Q3ZAV1,Q4G075,Q5I0D7,Q5I0E9,Q5M7T9,Q5RLM2,Q63270,Q63317,Q63355,Q63424,Q63618,Q64093,Q64602,Q66H69,Q6AYQ8,Q6MG61,Q6PCU2,Q6Q0N1,Q6TMA8,Q71MB6,Q80W57,Q8CIZ5,Q8R431,Q8R5M3,Q923S2,Q9JHB9,Q9JJ19,Q9JJ40,Q9QX74,Q9WTW7,Q9WUW8,Q9WUW9,Q9Z0V6,Q9Z0W7

|    |                       |                               |    |                                                                                                                                                                                                                                                                                                                                                 |
|----|-----------------------|-------------------------------|----|-------------------------------------------------------------------------------------------------------------------------------------------------------------------------------------------------------------------------------------------------------------------------------------------------------------------------------------------------|
| 54 | 1,2,3,4,5,7<br>,9,10  | 6,8,11,12,<br>13,14,15,1<br>6 | 5  | O70594,P36860,P70545,P80299,Q63618                                                                                                                                                                                                                                                                                                              |
| 55 | 1,2,3,4,5,7<br>,9,11  | 6,8,10,12,<br>13,14,15,1<br>6 | 2  | P08649,Q4KLZ6                                                                                                                                                                                                                                                                                                                                   |
| 56 | 1,2,3,4,5,7<br>,9,12  | 6,8,10,11,<br>13,14,15,1<br>6 | 2  | P80299,Q03191                                                                                                                                                                                                                                                                                                                                   |
| 57 | 1,2,3,4,5,7<br>,9,13  | 6,8,10,11,<br>12,14,15,1<br>6 | 3  | P08649,P36860,P80299                                                                                                                                                                                                                                                                                                                            |
| 58 | 1,2,3,4,5,7<br>,9,14  | 6,8,10,11,<br>12,13,15,1<br>6 | 2  | P08649,Q63751                                                                                                                                                                                                                                                                                                                                   |
| 59 | 1,2,3,4,5,7<br>,9,15  | 6,8,10,11,<br>12,13,14,1<br>6 | 4  | P01681,P08649,P08721,P80299                                                                                                                                                                                                                                                                                                                     |
| 60 | 1,2,3,4,5,7<br>,9,16  | 6,8,10,11,<br>12,13,14,1<br>5 | 1  | P08649                                                                                                                                                                                                                                                                                                                                          |
| 61 | 1,2,3,4,5,7<br>,10,11 | 6,8,9,12,1<br>3,14,15,16      | 5  | O08557,P47967,P80299,P97840,Q4KLZ6                                                                                                                                                                                                                                                                                                              |
| 62 | 1,2,3,4,5,7<br>,10,12 | 6,8,9,11,1<br>3,14,15,16      | 13 | P18297,P30904,P36860,P46844,P47967,P48508,P80299,P97840,Q5RLM2,Q63618,Q6Q0N1,Q71MB6,Q9WUW8                                                                                                                                                                                                                                                      |
| 63 | 1,2,3,4,5,7<br>,10,13 | 6,8,9,11,1<br>2,14,15,16      | 19 | A2RUW1,O70594,P18297,P19223,P19468,P36860,P46844,P47967,P48508,P80299,P97840,Q5IOE9,Q63355,Q63424,Q63618,Q64093,Q6Q0N1,Q9WUW8,Q9WUW9                                                                                                                                                                                                            |
| 64 | 1,2,3,4,5,7<br>,10,14 | 6,8,9,11,1<br>2,13,15,16      | 16 | O70594,P08753,P18297,P46844,P48037,P48508,P54921,P80299,Q5IOE9,Q5RLM2,Q63355,Q63618,Q71MB6,Q923S2,Q9WUW8,Q9WUW9                                                                                                                                                                                                                                 |
| 65 | 1,2,3,4,5,7<br>,10,15 | 6,8,9,11,1<br>2,13,14,16      | 40 | A2RUW1,B0LT89,O08557,O70377,O70594,O88339;Q4V882,P08721,P10536,P17988,P18297,P19468,P30904,P36860,P38918,P46844,P48508,P53790,P54921,P63095,P80299,Q05175,Q5IOE9,Q5RKI1,Q5RLM2,Q63270,Q63355,Q63424,Q63618,Q64093,Q6MG61,Q6Q0N1,Q71MB6,Q80W57,Q8R431,Q923S2,Q99MZ8,Q9JJ19,Q9WTW7,Q9WUW8,Q9Z0W7                                                  |
| 66 | 1,2,3,4,5,7<br>,10,16 | 6,8,9,11,1<br>2,13,14,15      | 48 | B0LT89,O70377,O70594,P02761,P17988,P18297,P18757,P19468,P23928,P29975,P46413,P46720,P46844,P48037,P48508,P53790,P57113,P62630,P80299,P97840,Q03248,Q3ZAV1,Q5I0D7,Q5I0E9,Q5M7T9,Q5RLM2,Q63270,Q63317,Q63355,Q63424,Q63618,Q64093,Q64602,Q6AYQ8,Q6MG61,Q6Q0N1,Q6TMA8,Q71MB6,Q80W57,Q8R431,Q923S2,Q9JJ19,Q9JJ40,Q9QYU4,Q9WTW7,Q9WUW8,Q9WUW9,Q9Z0W7 |
| 67 | 1,2,3,4,5,7<br>,11,12 | 6,8,9,10,1<br>3,14,15,16      | 8  | P08649,P35053,P47967,P70709,P80299,P97840,Q4KLZ6,Q5I0D1                                                                                                                                                                                                                                                                                         |

|    |                       |                               |    |                                                                                                                                                                  |
|----|-----------------------|-------------------------------|----|------------------------------------------------------------------------------------------------------------------------------------------------------------------|
| 68 | 1,2,3,4,5,7<br>,11,13 | 6,8,9,10,1<br>2,14,15,16      | 7  | B0BNN3,P08649,P47967,P80299,P97840,Q4KLZ6,Q5I0D1                                                                                                                 |
| 69 | 1,2,3,4,5,7<br>,11,14 | 6,8,9,10,1<br>2,13,15,16      | 4  | P08649,Q4KLZ6,Q63751,Q9WUW8                                                                                                                                      |
| 70 | 1,2,3,4,5,7<br>,11,15 | 6,8,9,10,1<br>2,13,14,16      | 13 | O08557,P08649,P08721,P17988,P97840,Q4FZU2,Q4KLZ6,Q6IFU8,Q6IFW6,Q6IG02,Q6IMF3,Q6P6Q2,Q8CJ52                                                                       |
| 71 | 1,2,3,4,5,7<br>,11,16 | 6,8,9,10,1<br>2,13,14,15      | 13 | P02761,P02781,P07647,P08649,P17988,P47967,P97840,Q08463,Q4FZU2,Q4KLZ6,Q6AYQ8,Q8R5M3,Q9JHB9                                                                       |
| 72 | 1,2,3,4,5,7<br>,12,13 | 6,8,9,10,1<br>1,14,15,16      | 5  | P36860,P47967,P80299,P97840,Q9WUW8                                                                                                                               |
| 73 | 1,2,3,4,5,7<br>,12,14 | 6,8,9,10,1<br>1,13,15,16      | 4  | P08649,P80299,Q5RLM2,Q9WUW8                                                                                                                                      |
| 74 | 1,2,3,4,5,7<br>,12,15 | 6,8,9,10,1<br>1,13,14,16      | 7  | O89117,P08649,P08721,P10758,P80299,P97840,Q6AY61                                                                                                                 |
| 75 | 1,2,3,4,5,7<br>,12,16 | 6,8,9,10,1<br>1,13,14,15      | 11 | B0LT89,P08649,P18297,P46844,P47967,P80299,P97840,Q5I0D7,Q5RLM2,Q71MB6,Q9WUW8                                                                                     |
| 76 | 1,2,3,4,5,7<br>,13,14 | 6,8,9,10,1<br>1,12,15,16      | 5  | B0BNN3,P02761,P08649,P80299,Q9WUW8                                                                                                                               |
| 77 | 1,2,3,4,5,7<br>,13,15 | 6,8,9,10,1<br>1,12,14,16      | 11 | O70594,P08649,P08721,P21674,P36860,P80299,P97840,Q63618,Q6AYQ8,Q6Q0N1,Q9WUW8                                                                                     |
| 78 | 1,2,3,4,5,7<br>,13,16 | 6,8,9,10,1<br>1,12,14,15      | 15 | B0BNN3,P02761,P08649,P18297,P19223,P19468,P46844,P47967,P80299,P97840,Q08463,Q5I0D7,Q6AYQ8,Q6TMA8,Q9WUW8                                                         |
| 79 | 1,2,3,4,5,7<br>,14,15 | 6,8,9,10,1<br>1,12,13,16      | 5  | B0LT89,P08649,Q5RLM2,Q62714,Q9WUW8                                                                                                                               |
| 80 | 1,2,3,4,5,7<br>,14,16 | 6,8,9,10,1<br>1,12,13,15      | 13 | B0BNN3,B0LT89,P02761,P08649,P18297,P46844,Q4KLZ6,Q5I0D7,Q5RLM2,Q63317,Q6TMA8,Q71MB6,Q9WUW8                                                                       |
| 81 | 1,2,3,4,5,7<br>,15,16 | 6,8,9,10,1<br>1,12,13,14      | 23 | B0LT89,O70594,P02761,P08649,P08721,P17988,P18297,P19468,P46844,P48508,Q5I0D7,Q5I0E9,Q63270,Q63317,Q64093,Q6AYQ8,Q6Q0N1,Q6TMA8,Q71MB6,Q8R431,Q9WTW7,Q9WUW8,Q9ZOW7 |
| 82 | 1,2,3,4,5,8<br>,9,10  | 6,7,11,12,<br>13,14,15,1<br>6 | 8  | O70594,P00774,P01681,P20760,P70545,P97580,Q30KJ2,Q63618                                                                                                          |
| 83 | 1,2,3,4,5,8<br>,9,11  | 6,7,10,12,<br>13,14,15,1<br>6 | 14 | O88797,P00774,P01681,P08649,P20760,P27590,Q10758,Q4FZU2,Q4KLZ6,Q6IFU7,Q6IFU8,Q6IFW6,Q6IMF3,Q6P6Q2                                                                |
| 84 | 1,2,3,4,5,8<br>,9,12  | 6,7,10,11,<br>13,14,15,1<br>6 | 4  | P00774,P01681,P20760,P36376                                                                                                                                      |
| 85 | 1,2,3,4,5,8<br>,9,13  | 6,7,10,11,<br>12,14,15,1<br>6 | 5  | D4A5U3,P00774,P01681,P20760,Q8CIZ5                                                                                                                               |

|     |                       |                               |    |                                                                                                                                                                                                                                                      |
|-----|-----------------------|-------------------------------|----|------------------------------------------------------------------------------------------------------------------------------------------------------------------------------------------------------------------------------------------------------|
| 86  | 1,2,3,4,5,8<br>,9,14  | 6,7,10,11,<br>12,13,15,1<br>6 | 6  | P00774,P01681,P08649,P20760,P97580,Q63751                                                                                                                                                                                                            |
| 87  | 1,2,3,4,5,8<br>,9,15  | 6,7,10,11,<br>12,13,14,1<br>6 | 5  | P00774,P01681,P19132,P20760,P36376                                                                                                                                                                                                                   |
| 88  | 1,2,3,4,5,8<br>,9,16  | 6,7,10,11,<br>12,13,14,1<br>5 | 6  | P00774,P01681,P08649,P20760,P23593,Q30KJ2                                                                                                                                                                                                            |
| 89  | 1,2,3,4,5,8<br>,10,11 | 6,7,9,12,1<br>3,14,15,16      | 12 | P01681,P27590,P97580,Q10758,Q4FZU2,Q4KLZ6,Q6IFU7,Q6IFU8,Q6IFW6,Q6IG02,Q6IMF3,Q6P6Q2                                                                                                                                                                  |
| 90  | 1,2,3,4,5,8<br>,10,12 | 6,7,9,11,1<br>3,14,15,16      | 12 | P01681,P0DMW0,P0DMW1,P30904,P34901,P46844,P48508,P97580,Q498D9,Q5RLM2,Q63618,Q6Q0N1,Q8CIZ5                                                                                                                                                           |
| 91  | 1,2,3,4,5,8<br>,10,13 | 6,7,9,11,1<br>2,14,15,16      | 16 | O70594,P01681,P19223,P30904,P36860,P46844,P48508,P97580,Q30KJ2,Q498D9,Q63618,Q66H69,Q6Q0N1,Q8CIZ5,Q9WUW8,Q9WUW9                                                                                                                                      |
| 92  | 1,2,3,4,5,8<br>,10,14 | 6,7,9,11,1<br>2,13,15,16      | 16 | O70594,P01681,P08937,P20760,P20762,P46844,P48508,P54921,P97580,Q30KJ2,Q5RLM2,Q63618,Q8CIZ5,Q923S2,Q9WUW8,Q9WUW9                                                                                                                                      |
| 93  | 1,2,3,4,5,8<br>,10,15 | 6,7,9,11,1<br>2,13,14,16      | 33 | O35763,O70377,O70594,O88339,Q4V882,P01681,P10536,P19132,P19468,P20762,P30904,P34901,P46844,P48508,P53790,P54921,P97580,Q05175,Q30KJ2,Q498D9,Q5I0E9,Q62753,Q63270,Q63355,Q63424,Q63618,Q64093,Q6IG05,Q6MG61,Q6Q0N1,Q80W57,Q8R431,Q923S2,Q9Z0W7        |
| 94  | 1,2,3,4,5,8<br>,10,16 | 6,7,9,11,1<br>2,13,14,15      | 35 | O35763,O70377,O70594,P01681,P07151,P18757,P19468,P20760,P20762,P46844,P48508,P53790,P97580,Q05175,Q30KJ2,Q3ZAV1,Q5I0E9,Q5RLM2,Q63270,Q63355,Q63424,Q63618,Q64093,Q64602,Q6MG61,Q6Q0N1,Q71MB6,Q80W57,Q8R431,Q923S2,Q9JJ40,Q9WTW7,Q9WUW8,Q9WUW9,Q9Z0W7 |
| 95  | 1,2,3,4,5,8<br>,11,12 | 6,7,9,10,1<br>3,14,15,16      | 16 | P00774,P01681,P27590,P47967,Q10758,Q4FZU2,Q4KLZ6,Q5I0D1,Q5PQL7,Q6IFU7,Q6IFU8,Q6IFW6,Q6IG02,Q6IG05,Q6IMF3,Q6P6Q2                                                                                                                                      |
| 96  | 1,2,3,4,5,8<br>,11,13 | 6,7,9,10,1<br>2,14,15,16      | 17 | B0BNN3,P00774,P01681,P08649,P47967,Q10758,Q4FZU2,Q4KLZ6,Q66H69,Q6IFU7,Q6IFU8,Q6IFW6,Q6IG02,Q6IG05,Q6IMF3,Q6P6Q2,Q8CIZ5                                                                                                                               |
| 97  | 1,2,3,4,5,8<br>,11,14 | 6,7,9,10,1<br>2,13,15,16      | 16 | B0BNN3,P01681,P08649,P08937,P97580,Q10758,Q4FZU2,Q4KLZ6,Q6IFU7,Q6IFU8,Q6IFW6,Q6IG02,Q6IG05,Q6IMF3,Q6P6Q2,Q8CIZ5                                                                                                                                      |
| 98  | 1,2,3,4,5,8<br>,11,15 | 6,7,9,10,1<br>2,13,14,16      | 13 | P00774,P01681,P08649,Q10758,Q4FZU2,Q4KLZ6,Q6IFU7,Q6IFU8,Q6IFW6,Q6IG02,Q6IG05,Q6IMF3,Q6P6Q2                                                                                                                                                           |
| 99  | 1,2,3,4,5,8<br>,11,16 | 6,7,9,10,1<br>2,13,14,15      | 24 | O88797,P00762,P00774,P01681,P02780,P02781,P02782,P05539,P07647,P08649,P30120,P97580,Q10758,Q30KJ2,Q4FZU2,Q4KLZ6,Q6IFU7,Q6IFU8,Q6IFW6,Q6IG02,Q6IG05,Q6IMF3,Q6P6Q2,Q9JHB9                                                                              |
| 100 | 1,2,3,4,5,8<br>,12,13 | 6,7,9,10,1<br>1,14,15,16      | 4  | P00774,P47967,Q66H69,Q8CIZ5                                                                                                                                                                                                                          |
| 101 | 1,2,3,4,5,8<br>,12,14 | 6,7,9,10,1<br>1,13,15,16      | 4  | P01681,P97580,Q5RLM2,Q8CIZ5                                                                                                                                                                                                                          |
| 102 | 1,2,3,4,5,8<br>,12,15 | 6,7,9,10,1<br>1,13,14,16      | 7  | P00774,P01681,P19132,P34901,P36376,Q498D9,Q6IG05                                                                                                                                                                                                     |



|     |                       |                          |    |                                                                                            |
|-----|-----------------------|--------------------------|----|--------------------------------------------------------------------------------------------|
| 103 | 1,2,3,4,5,8<br>,12,16 | 6,7,9,10,1<br>1,13,14,15 | 7  | P00774,P01681,P20760,P46844,Q30KJ2,Q5RLM2,Q6IG05                                           |
| 104 | 1,2,3,4,5,8<br>,13,14 | 6,7,9,10,1<br>1,12,15,16 | 6  | B0BNN3,D4A5U3,P01681,P97580,Q8CIZ5,Q9WUW8                                                  |
| 105 | 1,2,3,4,5,8<br>,13,15 | 6,7,9,10,1<br>1,12,14,16 | 10 | P00774,P01681,P19132,P21674,Q498D9,Q63618,Q6IG05,Q6Q0N1,Q8CIZ5,Q9WUW8                      |
| 106 | 1,2,3,4,5,8<br>,13,16 | 6,7,9,10,1<br>1,12,14,15 | 10 | B0BNN3,P00762,P00774,P19223,P20760,P46844,P97580,Q30KJ2,Q8CIZ5,Q9WUW8                      |
| 107 | 1,2,3,4,5,8<br>,14,15 | 6,7,9,10,1<br>1,12,13,16 | 7  | P01681,P08649,P19132,P54921,P97580,Q6IG05,Q9WUW8                                           |
| 108 | 1,2,3,4,5,8<br>,14,16 | 6,7,9,10,1<br>1,12,13,15 | 10 | B0BNN3,P01681,P08649,P20760,P20762,P97580,Q30KJ2,Q4KLZ6,Q5RLM2,Q9WUW8                      |
| 109 | 1,2,3,4,5,8<br>,15,16 | 6,7,9,10,1<br>1,12,13,14 | 13 | O70594,P01681,P08649,P20760,P20762,P46844,P48508,P97580,Q30KJ2,Q63270,Q6IG05,Q6Q0N1,Q9WUW8 |
| 110 | 1,2,3,4,5,9<br>,10,11 | 6,7,8,12,1<br>3,14,15,16 | 3  | P70549,Q4KLZ6,Q9Z2L0                                                                       |
| 111 | 1,2,3,4,5,9<br>,10,12 | 6,7,8,11,1<br>3,14,15,16 | 2  | Q03191,Q99041                                                                              |
| 112 | 1,2,3,4,5,9<br>,10,13 | 6,7,8,11,1<br>2,14,15,16 | 2  | Q9QW07,Q9QZK9                                                                              |
| 113 | 1,2,3,4,5,9<br>,10,14 | 6,7,8,11,1<br>2,13,15,16 | 1  | P30120                                                                                     |
| 114 | 1,2,3,4,5,9<br>,10,15 | 6,7,8,11,1<br>2,13,14,16 | 5  | P01681,P30120,P46462,Q8CFN2,Q99041                                                         |
| 115 | 1,2,3,4,5,9<br>,10,16 | 6,7,8,11,1<br>2,13,14,15 | 0  |                                                                                            |
| 116 | 1,2,3,4,5,9<br>,11,12 | 6,7,8,10,1<br>3,14,15,16 | 2  | Q03191,Q4KLZ6                                                                              |
| 117 | 1,2,3,4,5,9<br>,11,13 | 6,7,8,10,1<br>2,14,15,16 | 1  | Q4KLZ6                                                                                     |
| 118 | 1,2,3,4,5,9<br>,11,14 | 6,7,8,10,1<br>2,13,15,16 | 3  | P08649,P70549,Q4KLZ6                                                                       |
| 119 | 1,2,3,4,5,9<br>,11,15 | 6,7,8,10,1<br>2,13,14,16 | 8  | P01681,Q4FZU2,Q4KLZ6,Q6IFU8,Q6IFW6,Q6IG02,Q6IMF3,Q6P6Q2                                    |
| 120 | 1,2,3,4,5,9<br>,11,16 | 6,7,8,10,1<br>2,13,14,15 | 3  | P08649,P70549,Q4KLZ6                                                                       |
| 121 | 1,2,3,4,5,9<br>,12,13 | 6,7,8,10,1<br>1,14,15,16 | 2  | Q03191,Q99041                                                                              |
| 122 | 1,2,3,4,5,9<br>,12,14 | 6,7,8,10,1<br>1,13,15,16 | 1  | Q03191                                                                                     |

|     |                        |                          |                                                    |
|-----|------------------------|--------------------------|----------------------------------------------------|
| 123 | 1,2,3,4,5,9<br>,12,15  | 6,7,8,10,1<br>1,13,14,16 | 4 P30120,P34901,P36376,Q99041                      |
| 124 | 1,2,3,4,5,9<br>,12,16  | 6,7,8,10,1<br>1,13,14,15 | 2 Q03191,Q99041                                    |
| 125 | 1,2,3,4,5,9<br>,13,14  | 6,7,8,10,1<br>1,12,15,16 | 1 Q9QW07                                           |
| 126 | 1,2,3,4,5,9<br>,13,15  | 6,7,8,10,1<br>1,12,14,16 | 2 P21674,P62804                                    |
| 127 | 1,2,3,4,5,9<br>,13,16  | 6,7,8,10,1<br>1,12,14,15 | 0                                                  |
| 128 | 1,2,3,4,5,9<br>,14,15  | 6,7,8,10,1<br>1,12,13,16 | 2 P01681,P30120                                    |
| 129 | 1,2,3,4,5,9<br>,14,16  | 6,7,8,10,1<br>1,12,13,15 | 2 P23593,Q4KLZ6                                    |
| 130 | 1,2,3,4,5,9<br>,15,16  | 6,7,8,10,1<br>1,12,13,14 | 1 P29315                                           |
| 131 | 1,2,3,4,5,1<br>0,11,12 | 6,7,8,9,13,<br>14,15,16  | 4 P47967,P97840,Q4KLZ6,Q5I0D1                      |
| 132 | 1,2,3,4,5,1<br>0,11,13 | 6,7,8,9,12,<br>14,15,16  | 2 P47967,Q4KLZ6                                    |
| 133 | 1,2,3,4,5,1<br>0,11,14 | 6,7,8,9,12,<br>13,15,16  | 1 Q4KLZ6                                           |
| 134 | 1,2,3,4,5,1<br>0,11,15 | 6,7,8,9,12,<br>13,14,16  | 7 Q4FZU2,Q4KLZ6,Q6IFU8,Q6IFW6,Q6IG02,Q6IMF3,Q6P6Q2 |
| 135 | 1,2,3,4,5,1<br>0,11,16 | 6,7,8,9,12,<br>13,14,15  | 2 P70549,Q4KLZ6                                    |
| 136 | 1,2,3,4,5,1<br>0,12,13 | 6,7,8,9,11,<br>14,15,16  | 3 P47967,P97840,Q812E4                             |
| 137 | 1,2,3,4,5,1<br>0,12,14 | 6,7,8,9,11,<br>13,15,16  | 1 Q5RLM2                                           |
| 138 | 1,2,3,4,5,1<br>0,12,15 | 6,7,8,9,11,<br>13,14,16  | 5 P10758,P34901,Q498D9,Q812E4,Q99041               |
| 139 | 1,2,3,4,5,1<br>0,12,16 | 6,7,8,9,11,<br>13,14,15  | 1 P0DMW0;P0DMW1                                    |
| 140 | 1,2,3,4,5,1<br>0,13,14 | 6,7,8,9,11,<br>12,15,16  | 2 Q9QW07,Q9WUW8                                    |
| 141 | 1,2,3,4,5,1<br>0,13,15 | 6,7,8,9,11,<br>12,14,16  | 5 P21674,Q498D9,Q63618,Q812E4,Q8CFN2               |
| 142 | 1,2,3,4,5,1<br>0,13,16 | 6,7,8,9,11,<br>12,14,15  | 2 Q63618,Q9WUW8                                    |

|     |                        |                         |                                                                          |
|-----|------------------------|-------------------------|--------------------------------------------------------------------------|
| 143 | 1,2,3,4,5,1<br>0,14,15 | 6,7,8,9,11,<br>12,13,16 | 2 P30120,P54921                                                          |
| 144 | 1,2,3,4,5,1<br>0,14,16 | 6,7,8,9,11,<br>12,13,15 | 4 Q4KLZ6,Q5RLM2,Q71MB6,Q9WUW8                                            |
| 145 | 1,2,3,4,5,1<br>0,15,16 | 6,7,8,9,11,<br>12,13,14 | 5 P17988,P18297,P19468,P48508,Q71MB6                                     |
| 146 | 1,2,3,4,5,1<br>1,12,13 | 6,7,8,9,10,<br>14,15,16 | 4 P47967,P97840,Q4KLZ6,Q5I0D1                                            |
| 147 | 1,2,3,4,5,1<br>1,12,14 | 6,7,8,9,10,<br>13,15,16 | 1 Q4KLZ6                                                                 |
| 148 | 1,2,3,4,5,1<br>1,12,15 | 6,7,8,9,10,<br>13,14,16 | 7 Q4FZU2,Q4KLZ6,Q6IFU8,Q6IFW6,Q6IG02,Q6IMF3,Q6P6Q2                       |
| 149 | 1,2,3,4,5,1<br>1,12,16 | 6,7,8,9,10,<br>13,14,15 | 2 P97840,Q4KLZ6                                                          |
| 150 | 1,2,3,4,5,1<br>1,13,14 | 6,7,8,9,10,<br>12,15,16 | 3 B0BNN3,P35745,Q4KLZ6                                                   |
| 151 | 1,2,3,4,5,1<br>1,13,15 | 6,7,8,9,10,<br>12,14,16 | 8 P21674,Q4FZU2,Q4KLZ6,Q6IFU8,Q6IFW6,Q6IG02,Q6IMF3,Q6P6Q2                |
| 152 | 1,2,3,4,5,1<br>1,13,16 | 6,7,8,9,10,<br>12,14,15 | 2 P35745,Q4KLZ6                                                          |
| 153 | 1,2,3,4,5,1<br>1,14,15 | 6,7,8,9,10,<br>12,13,16 | 8 P08649,Q4FZU2,Q4KLZ6,Q6IFU8,Q6IFW6,Q6IG02,Q6IMF3,Q6P6Q2                |
| 154 | 1,2,3,4,5,1<br>1,14,16 | 6,7,8,9,10,<br>12,13,15 | 4 P08649,P35745,P70549,Q4KLZ6                                            |
| 155 | 1,2,3,4,5,1<br>1,15,16 | 6,7,8,9,10,<br>12,13,14 | 10 P08649,P17988,P29315,Q4FZU2,Q4KLZ6,Q6IFU8,Q6IFW6,Q6IG02,Q6IMF3,Q6P6Q2 |
| 156 | 1,2,3,4,5,1<br>2,13,14 | 6,7,8,9,10,<br>11,15,16 | 0                                                                        |
| 157 | 1,2,3,4,5,1<br>2,13,15 | 6,7,8,9,10,<br>11,14,16 | 1 P21674                                                                 |
| 158 | 1,2,3,4,5,1<br>2,13,16 | 6,7,8,9,10,<br>11,14,15 | 1 P97840                                                                 |
| 159 | 1,2,3,4,5,1<br>2,14,15 | 6,7,8,9,10,<br>11,13,16 | 0                                                                        |
| 160 | 1,2,3,4,5,1<br>2,14,16 | 6,7,8,9,10,<br>11,13,15 | 1 Q4KLZ6                                                                 |
| 161 | 1,2,3,4,5,1<br>2,15,16 | 6,7,8,9,10,<br>11,13,14 | 1 P10758                                                                 |
| 162 | 1,2,3,4,5,1<br>3,14,15 | 6,7,8,9,10,<br>11,12,16 | 1 P21674                                                                 |

|     |                        |                                |     |                                                                                                                                                                                                                                                                                                                                                                                                                                                                                                                                                                                                                                                                                                                                                                                                                                                                                                                                                                                                                                                                                                                                                                                                                                                                                                                                                                                                                                                                                                                                                                                                                                                                                                                                                                                                                                                                                                                                                                                                                                                                                                                                                                                                                                                         |
|-----|------------------------|--------------------------------|-----|---------------------------------------------------------------------------------------------------------------------------------------------------------------------------------------------------------------------------------------------------------------------------------------------------------------------------------------------------------------------------------------------------------------------------------------------------------------------------------------------------------------------------------------------------------------------------------------------------------------------------------------------------------------------------------------------------------------------------------------------------------------------------------------------------------------------------------------------------------------------------------------------------------------------------------------------------------------------------------------------------------------------------------------------------------------------------------------------------------------------------------------------------------------------------------------------------------------------------------------------------------------------------------------------------------------------------------------------------------------------------------------------------------------------------------------------------------------------------------------------------------------------------------------------------------------------------------------------------------------------------------------------------------------------------------------------------------------------------------------------------------------------------------------------------------------------------------------------------------------------------------------------------------------------------------------------------------------------------------------------------------------------------------------------------------------------------------------------------------------------------------------------------------------------------------------------------------------------------------------------------------|
| 163 | 1,2,3,4,5,1<br>3,14,16 | 6,7,8,9,10,<br>11,12,15        | 4   | B0BNN3,P35745,Q4KLZ6,Q9WUW8                                                                                                                                                                                                                                                                                                                                                                                                                                                                                                                                                                                                                                                                                                                                                                                                                                                                                                                                                                                                                                                                                                                                                                                                                                                                                                                                                                                                                                                                                                                                                                                                                                                                                                                                                                                                                                                                                                                                                                                                                                                                                                                                                                                                                             |
| 164 | 1,2,3,4,5,1<br>3,15,16 | 6,7,8,9,10,<br>11,12,14        | 1   | P21674                                                                                                                                                                                                                                                                                                                                                                                                                                                                                                                                                                                                                                                                                                                                                                                                                                                                                                                                                                                                                                                                                                                                                                                                                                                                                                                                                                                                                                                                                                                                                                                                                                                                                                                                                                                                                                                                                                                                                                                                                                                                                                                                                                                                                                                  |
| 165 | 1,2,3,4,5,1<br>4,15,16 | 6,7,8,9,10,<br>11,12,13        | 1   | Q4KLZ6                                                                                                                                                                                                                                                                                                                                                                                                                                                                                                                                                                                                                                                                                                                                                                                                                                                                                                                                                                                                                                                                                                                                                                                                                                                                                                                                                                                                                                                                                                                                                                                                                                                                                                                                                                                                                                                                                                                                                                                                                                                                                                                                                                                                                                                  |
| 166 | 1,2,3,4,6,7<br>,8,9    | 5,10,11,12<br>,13,14,15,<br>16 | 48  | B1H234,D3ZHA0,D4A5U3,iRT-<br>Kit_WR_fusion,O35763,O55004,O70417,O70594,P00774,P01681,P01836,P02631,P06761,P06911,P18418,P19223,P19629,P20646,P20761,P23739,P31430,P48508,P50115,P50280,P55091,P80299,P97580,P98089,Q05702,Q30KJ2,Q5GRG2,Q5QE79,Q5U2V4,Q62635,Q62946,Q63317,Q63598,Q63618,Q63751,Q6P6R2,Q6Q0N0,Q6Q0N1,Q6TMA8,Q78P75,Q8CIZ5,Q9JI85,Q9QX74,Q9R0T3<br>D3ZHA0,D4A5U3,O08557,O35763,O55004,O70257,O70377,O70417,O70594,O88339;Q4V882,P00774,P01836,P02454,P02631,P04904,P05371,P06761,P06911,P08937,P11762,P15399,P18418,P18757,P19112,P19223,P19468,P19629,P20646,P20761,P20762,P20766,P23739,P23928,P28570,P29975,P30904,P31044,P31430,P36860,P38918,P46720,P46844,P48037,P48508,P50115,P50280,P51907,P53790,P54921,P55091,P57113,P60711;P63259,P63081,P68035;P68136,P80299,P97580,P98089,Q03248,Q05175,Q05702,Q30KJ2,Q3MIE4,Q3T1J9,Q3ZAV1,Q5BJY9,Q5GRG2,Q5I0E9,Q5M7T9,Q5QE79,Q5RKI0,Q5RLM2,Q5U2Q3,Q62635,Q62687,Q62946,Q63270,Q63317,Q63355,Q63424,Q63598,Q63618,Q64093,Q64319,Q64602,Q66H69,Q66HG3,Q68FT5,Q6AY41,Q6AYS7,Q6AYT0,Q6MG61,Q6Q0N0,Q6Q0N1,Q6TMA8,Q71MB6,Q7TQ94,Q80W57,Q8CIZ5,Q8K3P7,Q8R431,Q923S2,Q99MZ8,Q9JI85,Q9JJ19,Q9JJ40,Q9JLJ3,Q9QX74,Q9QYU4,Q9R0T3,Q9R1T5,Q9WTW7,Q9WUW8,Q9WUW9,Q9Z0W7,Q9Z1F2<br>B1H234,D3ZHA0,D4A5U3,iRT-<br>Kit_WR_fusion,O35547,O55004,P00774,P02631,P02780,P02781,P02782,P05371,P06761,P06911,P07150,P07647,P08649,P08723,P09456,P0C0A9,P11598,P11762,P12020,P15399,P18418,P18757,P19223,P19629,P20646,P20761,P22273,P22282,P22283,P30904,P31044,P31430,P36374,P40241,P46462,P50115,P50280,P55091,P80299,P97580,P98089,Q05702,Q10758,Q30KJ2,Q4G063,Q4G075,Q5GRG2,Q5M7T9,Q5M8C6,Q5QE79,Q5U2V4,Q62635,Q62902,Q62946,Q63317,Q63493,Q63617,Q66H69,Q6AYR9,Q6IFU8,Q6P6S4,Q6Q0N0,Q6TMA8,Q78P75,Q8CIZ5,Q99041,Q9JHB9,Q9JI85,Q9QW07,Q9QX74,Q9QZK8,Q9R0T3,Q9WTW7<br>D3ZHA0,D4A5U3,iRT-<br>Kit_WR_fusion,O35763,O55004,O70417,P00774,P01836,P02631,P02781,P05371,P06761,P06911,P11762,P12020,P18418,P18757,P19223,P19629,P20761,P30904,P31044,P31430,P38918,P46844,P48508,P50115,P50280,P55091,P57113,P80299,P97580,P98089,Q05702,Q30KJ2,Q3ZAV1,Q5GRG2,Q5M7T9,Q5QE79,Q5RLM2,Q62635,Q62946,Q63270,Q63317,Q63598,Q63618,Q64602,Q66H69,Q66HG3,Q6MG61,Q6Q0N1,Q6TMA8,Q8CIZ5,Q9JI85,Q9QX74,Q9QYU4,Q9R0T3,Q9WTW7,Q9Z0W7 |
| 167 | 1,2,3,4,6,7<br>,8,10   | 5,9,11,12,<br>13,14,15,1<br>6  | 115 |                                                                                                                                                                                                                                                                                                                                                                                                                                                                                                                                                                                                                                                                                                                                                                                                                                                                                                                                                                                                                                                                                                                                                                                                                                                                                                                                                                                                                                                                                                                                                                                                                                                                                                                                                                                                                                                                                                                                                                                                                                                                                                                                                                                                                                                         |
| 168 | 1,2,3,4,6,7<br>,8,11   | 5,9,10,12,<br>13,14,15,1<br>6  | 77  |                                                                                                                                                                                                                                                                                                                                                                                                                                                                                                                                                                                                                                                                                                                                                                                                                                                                                                                                                                                                                                                                                                                                                                                                                                                                                                                                                                                                                                                                                                                                                                                                                                                                                                                                                                                                                                                                                                                                                                                                                                                                                                                                                                                                                                                         |
| 169 | 1,2,3,4,6,7<br>,8,12   | 5,9,10,11,<br>13,14,15,1<br>6  | 59  |                                                                                                                                                                                                                                                                                                                                                                                                                                                                                                                                                                                                                                                                                                                                                                                                                                                                                                                                                                                                                                                                                                                                                                                                                                                                                                                                                                                                                                                                                                                                                                                                                                                                                                                                                                                                                                                                                                                                                                                                                                                                                                                                                                                                                                                         |

|     |                      |                               |     |                                                                                                                                                                                                                                                                                                                                                                                                                                                                                                                                                                                                                                                                                                                                                                                                                                                |
|-----|----------------------|-------------------------------|-----|------------------------------------------------------------------------------------------------------------------------------------------------------------------------------------------------------------------------------------------------------------------------------------------------------------------------------------------------------------------------------------------------------------------------------------------------------------------------------------------------------------------------------------------------------------------------------------------------------------------------------------------------------------------------------------------------------------------------------------------------------------------------------------------------------------------------------------------------|
| 170 | 1,2,3,4,6,7<br>,8,13 | 5,9,10,11,<br>12,14,15,1<br>6 | 64  | B0BNN3,B1H234,D3ZHA0,D4A5U3,O55004,O70257,O70377,O70594,P00774,P01836,P02631,P02761,P02781,P05371,P06761,P06911,P15399,P18418,P19223,P19468,P19629,P20761,P30904,P31044,P31430,P36860,P46844,P48508,P50115,P50280,P55091,P57113,P63081,P80299,P97580,P98089,Q05702,Q30KJ2,Q3ZAV1,Q5GRG2,Q5M7T9,Q5QE79,Q62635,Q62714,Q62902,Q62946,Q63317,Q63424,Q63598,Q63618,Q66H69,Q66HG3,Q6AYS7,Q6Q0N0,Q6Q0N1,Q6TMA8,Q8CI Z5,Q9JI85,Q9QX74,Q9R0T3,Q9WTW7,Q9WUW8,Q9WUW9,Q9Z0W7                                                                                                                                                                                                                                                                                                                                                                               |
| 171 | 1,2,3,4,6,7<br>,8,14 | 5,9,10,11,<br>12,13,15,1<br>6 | 64  | B0BNN3,B1H234,D3ZHA0,D4A5U3,O55004,O70377,O70417,O70594,P02631,P02761,P06761,P06911,P08937,P11762,P12020,P15399,P18418,P18757,P19223,P19629,P20646,P20761,P20762,P31044,P31430,P46844,P48037,P48508,P50115,P50280,P54921,P55091,P57113,P63081,P80299,P97580,P98089,Q05702,Q30KJ2,Q4G075,Q5GRG2,Q5M7T9,Q5QE79,Q5RLM2,Q62635,Q62714,Q62812,Q62946,Q63317,Q63598,Q63618,Q63751,Q64602,Q66H69,Q66HG3,Q6Q0N1,Q6TMA 8,Q8CIZ5,Q923S2,Q9JI85,Q9QX74,Q9R0T3,Q9WUW8,Q9WUW9                                                                                                                                                                                                                                                                                                                                                                               |
| 172 | 1,2,3,4,6,7<br>,8,15 | 5,9,10,11,<br>12,13,14,1<br>6 | 95  | B0LT89,B1H234,D3ZHA0,D4A5U3,iRT-Kit_WR_fusion,O08557,O35763,O55004,O70257,O70377,O70594,O88339,Q4V882,P00774,P020 91,P02631,P04904,P04916,P06761,P06911,P08721,P09606,P11762,P15399,P17988,P18418,P18 757,P19112,P19223,P19468,P19629,P20646,P20761,P20762,P29975,P30904,P31044,P31430,P3 6860,P38918,P46844,P48508,P50115,P50280,P51907,P53790,P54921,P55091,P57113,P68035;P 68136,P80299,P97580,P98089,Q03248,Q05175,Q05702,Q30KJ2,Q3ZAV1,Q498D9,Q5GRG2,Q5I 0E9,Q5M7T9,Q5U2Q3,Q62635,Q62714,Q62812,Q62946,Q63270,Q63317,Q63424,Q63598,Q63 618,Q64093,Q64602,Q66H69,Q6AYS7,Q6AYT0,Q6MG61,Q6PCU2,Q6Q0N0,Q6Q0N1,Q6TMA8, Q80W57,Q8CIZ5,Q8R431,Q923S2,Q99MZ8,Q9JI85,Q9JLJ3,Q9QX74,Q9QYU4,Q9R0T3,Q9R1T5, Q9WTW7,Q9Z0V6,Q9Z0W7                                                                                                                      |
| 173 | 1,2,3,4,6,7<br>,8,16 | 5,9,10,11,<br>12,13,14,1<br>5 | 114 | B0BNA5,B0BNN3,B0LT89,B1H234,D3ZHA0,D4A5U3,O35763,O55004,O70257,O70377,O70594, P00774,P01836,P02631,P02761,P02780,P02781,P02782,P02783,P04904,P05371,P06761,P06911 ,P07151,P07647,P08723,P09606,P11598,P15399,P18418,P18757,P19112,P19223,P19468,P1962 9,P20646,P20761,P20762,P22006,P22282,P22283,P23928,P28570,P29975,P31430,P38918,P415 62,P46720,P46844,P48037,P48508,P50115,P50280,P52847,P53790,P55091,P57113,P63081,P68 035;P68136,P80299,P97580,P98089,Q03248,Q05175,Q05702,Q1WIM3,Q30KJ2,Q3T1J9,Q3ZAV 1,Q5GRG2,Q5I0D7,Q5I0E9,Q5M7T9,Q5M8C6,Q5U2Q3,Q62635,Q62812,Q62902,Q62946,Q632 70,Q63317,Q63424,Q63598,Q63618,Q64093,Q64602,Q66H69,Q66HG3,Q68FT5,Q6AY33,Q6AY 41,Q6AYS7,Q6MG61,Q6Q0N0,Q6Q0N1,Q6TMA8,Q71MB6,Q80W57,Q8CIZ5,Q8R431,Q923S2, Q9JHB9,Q9JI85,Q9JJ40,Q9JLJ3,Q9QX74,Q9QYU4,Q9QZK8,Q9R0T3,Q9R1T5,Q9WTW7,Q9WUW 8,Q9WUW9,Q9Z0W7 |
| 174 | 1,2,3,4,6,7<br>,9,10 | 5,8,11,12,<br>13,14,15,1<br>6 | 10  | O70594,P20766,P23739,P36860,P55091,P80299,Q63598,Q63618,Q8K1G0,Q9WVH8                                                                                                                                                                                                                                                                                                                                                                                                                                                                                                                                                                                                                                                                                                                                                                          |
| 175 | 1,2,3,4,6,7<br>,9,11 | 5,8,10,12,<br>13,14,15,1<br>6 | 9   | B1H234,P11598,P22283,P55091,P80299,Q5GRG2,Q63493,Q63617,Q9R0T3                                                                                                                                                                                                                                                                                                                                                                                                                                                                                                                                                                                                                                                                                                                                                                                 |

|     |                       |                               |    |                                                                                                                                                                                                                                                                                                                                                                                                                                                                               |
|-----|-----------------------|-------------------------------|----|-------------------------------------------------------------------------------------------------------------------------------------------------------------------------------------------------------------------------------------------------------------------------------------------------------------------------------------------------------------------------------------------------------------------------------------------------------------------------------|
| 176 | 1,2,3,4,6,7<br>,9,12  | 5,8,10,11,<br>13,14,15,1<br>6 | 1  | P80299                                                                                                                                                                                                                                                                                                                                                                                                                                                                        |
| 177 | 1,2,3,4,6,7<br>,9,13  | 5,8,10,11,<br>12,14,15,1<br>6 | 6  | B1H234,P19223,P36860,P55091,P80299,Q5QE79                                                                                                                                                                                                                                                                                                                                                                                                                                     |
| 178 | 1,2,3,4,6,7<br>,9,14  | 5,8,10,11,<br>12,13,15,1<br>6 | 4  | B1H234,P80299,Q5QE79,Q63751                                                                                                                                                                                                                                                                                                                                                                                                                                                   |
| 179 | 1,2,3,4,6,7<br>,9,15  | 5,8,10,11,<br>12,13,14,1<br>6 | 4  | B1H234,P02091,P08721,P80299                                                                                                                                                                                                                                                                                                                                                                                                                                                   |
| 180 | 1,2,3,4,6,7<br>,9,16  | 5,8,10,11,<br>12,13,14,1<br>5 | 7  | B1H234,P02783,P07647,P22006,P23739,P80299,Q498R7                                                                                                                                                                                                                                                                                                                                                                                                                              |
| 181 | 1,2,3,4,6,7<br>,10,11 | 5,8,9,12,1<br>3,14,15,16      | 13 | B1H234,O08557,P08721,P11598,P18757,P20766,P22283,P31430,P48037,P55091,P80299,Q9R0T3,Q9WTW7                                                                                                                                                                                                                                                                                                                                                                                    |
| 182 | 1,2,3,4,6,7<br>,10,12 | 5,8,9,11,1<br>3,14,15,16      | 22 | P10758,P11762,P18297,P19468,P30904,P36860,P46844,P48508,P55091,P57113,P80299,Q03248,Q5RLM2,Q63270,Q63598,Q63618,Q66HG3,Q6Q0N1,Q71MB6,Q9JJ40,Q9QYU4,Q9WTW7                                                                                                                                                                                                                                                                                                                     |
| 183 | 1,2,3,4,6,7<br>,10,13 | 5,8,9,11,1<br>2,14,15,16      | 29 | B1H234,O55004,O70377,O70594,P18297,P19223,P19468,P29975,P36860,P46844,P48508,P51907,P55091,P57113,P80299,Q5I0E9,Q5M7T9,Q63424,Q63598,Q63618,Q64093,Q66HG3,Q6Q0N1,Q80W57,Q923M1,Q9WTW7,Q9WUW8,Q9WUW9,Q9Z0W7                                                                                                                                                                                                                                                                    |
| 184 | 1,2,3,4,6,7<br>,10,14 | 5,8,9,11,1<br>2,13,15,16      | 28 | B1H234,O70377,O70594,P18297,P18757,P19223,P19468,P46844,P48037,P48508,P54921,P55091,P57113,P80299,Q5I0E9,Q5QE79,Q5RLM2,Q63598,Q63618,Q63751,Q64602,Q66HG3,Q6Q0N1,Q71MB6,Q80WL1,Q923S2,Q9WUW8,Q9WUW9                                                                                                                                                                                                                                                                           |
| 185 | 1,2,3,4,6,7<br>,10,15 | 5,8,9,11,1<br>2,13,14,16      | 53 | O08557,O35763,O70377,O70594,O88339,Q4V882,P02091,P08721,P10758,P17988,P18297,P18757,P19468,P19629,P20766,P29975,P30904,P36860,P38918,P46844,P48508,P51907,P53790,P54921,P55091,P57113,P68035,P68136,P80299,Q03248,Q05175,Q3MIE4,Q5I0E9,Q5M7T9,Q5RKI1,Q63270,Q63424,Q63598,Q63618,Q64093,Q64602,Q6MG61,Q6Q0N1,Q71MB6,Q80W57,Q8K3P7,Q8R431,Q923M1,Q923S2,Q9JJ40,Q9JLJ3,Q9QYU4,Q9R1T5,Q9WTW7,Q9Z0W7                                                                              |
| 186 | 1,2,3,4,6,7<br>,10,16 | 5,8,9,11,1<br>2,13,14,15      | 64 | B0LT89,O35763,O55004,O70377,O70594,P02761,P02783,P07647,P17988,P18297,P18757,P19223,P19468,P19629,P20766,P23739,P23928,P28570,P29975,P38918,P46720,P46844,P48037,P48508,P51907,P52847,P53790,P57113,P60711,P63259,P68035,P68136,P80299,Q03248,Q05175,Q1WIM3,Q3T1J9,Q3ZAV1,Q5I0D7,Q5I0E9,Q5M7T9,Q63270,Q63317,Q63424,Q63598,Q63618,Q64093,Q64602,Q66HG3,Q68FT5,Q6MG61,Q6Q0N1,Q71MB6,Q80W57,Q8R431,Q8VI04,Q923M1,Q923S2,Q9JJ40,Q9JLJ3,Q9QYU4,Q9R1T5,Q9WTW7,Q9WUW8,Q9WUW9,Q9Z0W7 |
| 187 | 1,2,3,4,6,7<br>,11,12 | 5,8,9,10,1<br>3,14,15,16      | 15 | B1H234,P07647,P11598,P11762,P22283,P31430,P47967,P55091,P70709,P80299,Q5GRG2,Q63493,Q63617,Q9JI85,Q9R0T3                                                                                                                                                                                                                                                                                                                                                                      |
| 188 | 1,2,3,4,6,7<br>,11,13 | 5,8,9,10,1<br>2,14,15,16      | 13 | B0BNN3,B1H234,P05369,P07647,P11598,P22283,P55091,P80299,Q5GRG2,Q63493,Q63617,Q9JI85,Q9R0T3                                                                                                                                                                                                                                                                                                                                                                                    |

|     |                       |                           |    |                                                                                                                                                                                                                                                             |
|-----|-----------------------|---------------------------|----|-------------------------------------------------------------------------------------------------------------------------------------------------------------------------------------------------------------------------------------------------------------|
| 189 | 1,2,3,4,6,7<br>,11,14 | 5,8,9,10,1<br>2,13,15,16  | 8  | B1H234,P07647,P11598,P22283,P80299,Q4KLZ6,Q5GRG2,Q63751                                                                                                                                                                                                     |
| 190 | 1,2,3,4,6,7<br>,11,15 | 5,8,9,10,1<br>2,13,14,16  | 12 | B1H234,O08557,P02091,P08721,P11598,P17988,P22283,P80299,Q5GRG2,Q6IFW6,Q6IG02,Q8CJ52                                                                                                                                                                         |
| 191 | 1,2,3,4,6,7<br>,11,16 | 5,8,9,10,1<br>2,13,14,15  | 25 | B1H234,O35547,P02761,P02780,P02781,P02782,P02783,P05369,P07647,P08723,P0C0A9,P11598,P17988,P22006,P22283,P80299,P81556,Q4KLZ6,Q5GRG2,Q63493,Q63617,Q9JHB9,Q9JI85,Q9ROT3,Q9WTW7                                                                              |
| 192 | 1,2,3,4,6,7<br>,12,13 | 5,8,9,10,1<br>1,14,15,16  | 6  | B1H234,P01835,P11762,P36860,P47967,P80299                                                                                                                                                                                                                   |
| 193 | 1,2,3,4,6,7<br>,12,14 | 5,8,9,10,1<br>1,13,15,16  | 5  | P11762,P80299,Q5RLM2,Q63751,Q80WL1                                                                                                                                                                                                                          |
| 194 | 1,2,3,4,6,7<br>,12,15 | 5,8,9,10,1<br>1,13,14,16  | 7  | P08721,P10758,P11762,P17988,P19629,P80299,Q63598                                                                                                                                                                                                            |
| 195 | 1,2,3,4,6,7<br>,12,16 | 5,8,9,10,1<br>1,13,14,15  | 11 | P02783,P07647,P11762,P18297,P46844,P80299,Q03248,Q5I0D7,Q63598,Q71MB6,Q9WTW7                                                                                                                                                                                |
| 196 | 1,2,3,4,6,7<br>,13,14 | 5,8,9,10,1<br>1,12,15,16  | 8  | B0BNN3,B1H234,P01835,P02761,P19223,P80299,Q5QE79,Q9WUW8                                                                                                                                                                                                     |
| 197 | 1,2,3,4,6,7<br>,13,15 | 5,8,9,10,1<br>1,12,14,16  | 9  | B1H234,O70594,P01835,P08721,P19468,P36860,P80299,Q63618,Q6Q0N1                                                                                                                                                                                              |
| 198 | 1,2,3,4,6,7<br>,13,16 | 5,8,9,10,1<br>1,12,14,15  | 21 | B0BNN3,B1H234,O70594,P01835,P02761,P02783,P07647,P18297,P19223,P19468,P22006,P28570,P46844,P57113,P80299,Q1WIM3,Q5I0D7,Q63424,Q6AYQ8,Q6Q0N1,Q9WUW8                                                                                                          |
| 199 | 1,2,3,4,6,7<br>,14,15 | 5,8,9,10,1<br>1,12,13,16  | 9  | B0LT89,B1H234,P02091,P08721,P11762,P17988,P54921,P80299,Q62714                                                                                                                                                                                              |
| 200 | 1,2,3,4,6,7<br>,14,16 | 5,8,9,10,1<br>1,12,13,15  | 18 | B0BNN3,B0LT89,B1H234,P02761,P02783,P07647,P18297,P19223,P22006,P46844,P48037,P57113,P80299,Q4KLZ6,Q62812,Q63317,Q71MB6,Q9WUW8                                                                                                                               |
| 201 | 1,2,3,4,6,7<br>,15,16 | 5,8,9,10,1<br>1,12,13,14  | 36 | B0LT89,B1H234,O70594,P02091,P02761,P02783,P07647,P08721,P10758,P17988,P18297,P19468,P19629,P22006,P29975,P38918,P46844,P48508,P53790,P57113,P80299,Q03248,Q5I0D7,Q5I0E9,Q5M7T9,Q63270,Q63317,Q63424,Q63598,Q6AYQ8,Q6Q0N1,Q71MB6,Q80W57,Q9R1T5,Q9WTW7,Q9Z0W7 |
| 202 | 1,2,3,4,6,8<br>,9,10  | 5,7,11,12,<br>13,14,15,16 | 20 | O55004,O70594,P00774,P01681,P02454,P02631,P15399,P17559,P18418,P19629,P23739,P55091,P70545,P97580,Q05702,Q06000,Q30KJ2,Q63598,Q63618,Q8CIZ5                                                                                                                 |
| 203 | 1,2,3,4,6,8<br>,9,11  | 5,7,10,12,<br>13,14,15,16 | 17 | D4A5U3,P00774,P01681,P06911,P15399,P31430,P50280,P55091,P97580,Q05702,Q10758,Q30KJ2,Q5GRG2,Q63493,Q6P6S4,Q8CIZ5,Q9JI85                                                                                                                                      |
| 204 | 1,2,3,4,6,8<br>,9,12  | 5,7,10,11,<br>13,14,15,16 | 9  | P00774,P06911,P97580,P98089,Q05702,Q09030,Q30KJ2,Q8CIZ5,Q9JI85                                                                                                                                                                                              |
| 205 | 1,2,3,4,6,8<br>,9,13  | 5,7,10,11,<br>12,14,15,16 | 10 | D4A5U3,P00774,P19223,P55091,P97580,Q05702,Q09030,Q30KJ2,Q8CIZ5,Q9JI85                                                                                                                                                                                       |

|     |                       |                               |    |                                                                                                                                                                                                                                                                                                                                                                                                                                                          |
|-----|-----------------------|-------------------------------|----|----------------------------------------------------------------------------------------------------------------------------------------------------------------------------------------------------------------------------------------------------------------------------------------------------------------------------------------------------------------------------------------------------------------------------------------------------------|
| 206 | 1,2,3,4,6,8<br>,9,14  | 5,7,10,11,<br>12,13,15,1<br>6 | 13 | D4A5U3,O70417,P00774,P01681,P15399,P23593,P97580,Q05702,Q09030,Q30KJ2,Q62635,Q63751,Q8CIZ5                                                                                                                                                                                                                                                                                                                                                               |
| 207 | 1,2,3,4,6,8<br>,9,15  | 5,7,10,11,<br>12,13,14,1<br>6 | 11 | P00774,P01681,P02091,P15399,P19629,P23593,P36376,P97580,Q05702,Q30KJ2,Q99MH3                                                                                                                                                                                                                                                                                                                                                                             |
| 208 | 1,2,3,4,6,8<br>,9,16  | 5,7,10,11,<br>12,13,14,1<br>5 | 14 | D4A5U3,P00774,P02783,P07151,P15399,P20761,P22006,P23593,P50280,P97580,Q05702,Q09030,Q30KJ2,Q498R7                                                                                                                                                                                                                                                                                                                                                        |
| 209 | 1,2,3,4,6,8<br>,10,11 | 5,7,9,12,1<br>3,14,15,16      | 21 | O55004,P05371,P06911,P15399,P18418,P19629,P31430,P50280,P55091,P63029,P97580,Q05702,Q10758,Q30KJ2,Q5BJY9,Q5GRG2,Q63493,Q68G31,Q6P6S4,Q8CIZ5,Q9JI85                                                                                                                                                                                                                                                                                                       |
| 210 | 1,2,3,4,6,8<br>,10,12 | 5,7,9,11,1<br>3,14,15,16      | 21 | O55004,O70377,P02631,P11762,P15399,P19629,P30904,P46844,P48508,P55091,P97580,P98089,Q05702,Q30KJ2,Q498D9,Q63598,Q63618,Q66HG3,Q6Q0N1,Q8CIZ5,Q9JI85                                                                                                                                                                                                                                                                                                       |
| 211 | 1,2,3,4,6,8<br>,10,13 | 5,7,9,11,1<br>2,14,15,16      | 29 | O55004,O70257,O70377,O70594,O88339;Q4V882,P02631,P05371,P15399,P19223,P19468,P30904,P36860,P46844,P48508,P51907,P55091,P97580,Q05702,Q30KJ2,Q498D9,Q63424,Q63598,Q63618,Q66HG3,Q68G31,Q6Q0N1,Q8CIZ5,Q9JI85,Q9WUW8                                                                                                                                                                                                                                        |
| 212 | 1,2,3,4,6,8<br>,10,14 | 5,7,9,11,1<br>2,13,15,16      | 25 | O55004,O70377,O70417,O70594,O88339;Q4V882,P15399,P20762,P46844,P48508,P54921,P55091,P57113,P97580,Q05702,Q06000,Q30KJ2,Q5RLM2,Q63618,Q63751,Q68G31,Q6Q0N1,Q8CIZ5,Q923S2,Q9WUW8,Q9WUW9                                                                                                                                                                                                                                                                    |
| 213 | 1,2,3,4,6,8<br>,10,15 | 5,7,9,11,1<br>2,13,14,16      | 43 | O35763,O55004,O70377,O70594,O88339;Q4V882,P02091,P15399,P19468,P19629,P20762,P30904,P38918,P46844,P48508,P50280,P51907,P53790,P54921,P55091,P68035,P68136,P97580,Q03248,Q05175,Q05702,Q30KJ2,Q3ZAV1,Q498D9,Q5I0E9,Q5M7T9,Q63270,Q63424,Q63598,Q63618,Q6MG61,Q6Q0N1,Q80W57,Q8CIZ5,Q8R431,Q923S2,Q9JLJ3,Q9R1T5,Q9WTW7,Q9Z0W7                                                                                                                               |
| 214 | 1,2,3,4,6,8<br>,10,16 | 5,7,9,11,1<br>2,13,14,15      | 61 | O35763,O55004,O70257,O70377,O70594,O88339;Q4V882,P02631,P02783,P05371,P07151,P15399,P18418,P18757,P19223,P19468,P19629,P20761,P20762,P28570,P29975,P38918,P46844,P48508,P50280,P51907,P53790,P57113,P68035,P68136,P97580,Q03248,Q05175,Q05702,Q30KJ2,Q3T1J9,Q3ZAV1,Q5BJY9,Q5I0E9,Q5M7T9,Q5U2Q3,Q63270,Q63424,Q63598,Q63618,Q64093,Q64602,Q6AY41,Q6MG61,Q6Q0N1,Q71MB6,Q80W57,Q8R431,Q923S2,Q9JI85,Q9JJ40,Q9JLJ3,Q9QYU4,Q9R1T5,Q9WTW7,Q9WUW8,Q9WUW9,Q9Z0W7 |
| 215 | 1,2,3,4,6,8<br>,11,12 | 5,7,9,10,1<br>3,14,15,16      | 18 | P00774,P06911,P11762,P12020,P15399,P31430,P40241,P50280,P55091,P97580,P98089,Q05702,Q10758,Q30KJ2,Q5GRG2,Q63493,Q8CIZ5,Q9JI85                                                                                                                                                                                                                                                                                                                            |
| 216 | 1,2,3,4,6,8<br>,11,13 | 5,7,9,10,1<br>2,14,15,16      | 22 | B0BNN3,D4A5U3,P00774,P02781,P06911,P08723,P12020,P15399,P31430,P40241,P50280,P55091,P97580,Q05702,Q10758,Q30KJ2,Q5GRG2,Q62902,Q63493,Q68G31,Q8CIZ5,Q9JI85                                                                                                                                                                                                                                                                                                |
| 217 | 1,2,3,4,6,8<br>,11,14 | 5,7,9,10,1<br>2,13,15,16      | 17 | B0BNN3,P06911,P12020,P15399,P31430,P50280,P63029,P97580,Q10758,Q30KJ2,Q4KLZ6,Q5GRG2,Q62635,Q63493,Q63751,Q8CIZ5,Q9JI85                                                                                                                                                                                                                                                                                                                                   |
| 218 | 1,2,3,4,6,8<br>,11,15 | 5,7,9,10,1<br>2,13,14,16      | 24 | P00774,P02091,P06911,P15399,P19629,P31430,P50280,P97580,Q05702,Q10758,Q30KJ2,Q4FZU2,Q5GRG2,Q63493,Q6IFU7,Q6IFU8,Q6IFW6,Q6IG02,Q6IMF3,Q6P6Q2,Q6P6S4,Q8CIZ5,Q8CJ52,Q9JI85                                                                                                                                                                                                                                                                                  |



|     |                       |                          |    |                                                                                                                                                                                                                                                      |
|-----|-----------------------|--------------------------|----|------------------------------------------------------------------------------------------------------------------------------------------------------------------------------------------------------------------------------------------------------|
| 219 | 1,2,3,4,6,8<br>,11,16 | 5,7,9,10,1<br>2,13,14,15 | 35 | O35547,P00762,P00774,P02780,P02781,P02782,P02783,P05369,P06911,P07151,P07647,P08723,P09456,P0C0A9,P12020,P15399,P20761,P22282,P30120,P31430,P36374,P40241,P46462,P50280,P97580,Q05702,Q10758,Q30KJ2,Q4KLZ6,Q5GRG2,Q5M8C6,Q62902,Q63493,Q9JHB9,Q9JI85 |
| 220 | 1,2,3,4,6,8<br>,12,13 | 5,7,9,10,1<br>1,14,15,16 | 10 | P00774,P02631,P06911,P11762,P97580,P98089,Q05702,Q30KJ2,Q8CIZ5,Q9JI85                                                                                                                                                                                |
| 221 | 1,2,3,4,6,8<br>,12,14 | 5,7,9,10,1<br>1,13,15,16 | 14 | O70417,P06911,P11762,P15399,P97580,P98089,Q05702,Q30KJ2,Q5GRG2,Q5RLM2,Q62635,Q63751,Q8CIZ5,Q9JI85                                                                                                                                                    |
| 222 | 1,2,3,4,6,8<br>,12,15 | 5,7,9,10,1<br>1,13,14,16 | 13 | P00774,P02091,P11762,P15399,P19629,P36376,P97580,P98089,Q05702,Q30KJ2,Q498D9,Q63598,Q8CIZ5                                                                                                                                                           |
| 223 | 1,2,3,4,6,8<br>,12,16 | 5,7,9,10,1<br>1,13,14,15 | 17 | O55004,P00774,P02783,P06911,P07151,P07647,P11762,P15399,P19629,P46844,P50280,P97580,P98089,Q05702,Q30KJ2,Q63598,Q9JI85                                                                                                                               |
| 224 | 1,2,3,4,6,8<br>,13,14 | 5,7,9,10,1<br>1,12,15,16 | 12 | B0BNN3,D4A5U3,P15399,P19223,P97580,Q30KJ2,Q62635,Q68G31,Q8CIZ5,Q9JI85,Q9QWN8,Q9WUW8                                                                                                                                                                  |
| 225 | 1,2,3,4,6,8<br>,13,15 | 5,7,9,10,1<br>1,12,14,16 | 14 | O55004,P00774,P02091,P15399,P19629,P97580,Q05702,Q30KJ2,Q498D9,Q63618,Q68G31,Q6Q0N1,Q8CIZ5,Q9JI85                                                                                                                                                    |
| 226 | 1,2,3,4,6,8<br>,13,16 | 5,7,9,10,1<br>1,12,14,15 | 20 | B0BNN3,D4A5U3,O55004,O70257,P00762,P00774,P02783,P07151,P07647,P15399,P19223,P20761,P46844,P97580,Q05702,Q30KJ2,Q6Q0N1,Q8CIZ5,Q9JI85,Q9WUW8                                                                                                          |
| 227 | 1,2,3,4,6,8<br>,14,15 | 5,7,9,10,1<br>1,12,13,16 | 8  | P02091,P15399,P50280,P54921,P97580,Q05702,Q30KJ2,Q8CIZ5                                                                                                                                                                                              |
| 228 | 1,2,3,4,6,8<br>,14,16 | 5,7,9,10,1<br>1,12,13,15 | 15 | B0BNN3,P02783,P07151,P07647,P15399,P20761,P46844,P50280,P97580,Q05702,Q30KJ2,Q4KLZ6,Q62635,Q9JI85,Q9WUW8                                                                                                                                             |
| 229 | 1,2,3,4,6,8<br>,15,16 | 5,7,9,10,1<br>1,12,13,14 | 26 | O55004,O70377,O70594,P02091,P02783,P07151,P15399,P17988,P19468,P19629,P20761,P46844,P48508,P50280,P53790,P97580,Q05702,Q30KJ2,Q5M7T9,Q5U2Q3,Q63270,Q63598,Q6Q0N1,Q9R1T5,Q9WTW7,Q9Z0W7                                                                |
| 230 | 1,2,3,4,6,9<br>,10,11 | 5,7,8,12,1<br>3,14,15,16 | 0  |                                                                                                                                                                                                                                                      |
| 231 | 1,2,3,4,6,9<br>,10,12 | 5,7,8,11,1<br>3,14,15,16 | 0  |                                                                                                                                                                                                                                                      |
| 232 | 1,2,3,4,6,9<br>,10,13 | 5,7,8,11,1<br>2,14,15,16 | 3  | P80299,Q06000,Q8K1G0                                                                                                                                                                                                                                 |
| 233 | 1,2,3,4,6,9<br>,10,14 | 5,7,8,11,1<br>2,13,15,16 | 2  | Q06000,Q8K1G0                                                                                                                                                                                                                                        |
| 234 | 1,2,3,4,6,9<br>,10,15 | 5,7,8,11,1<br>2,13,14,16 | 4  | P02091,Q811M5,Q8K1G0,Q99MH3                                                                                                                                                                                                                          |
| 235 | 1,2,3,4,6,9<br>,10,16 | 5,7,8,11,1<br>2,13,14,15 | 6  | D3ZUC6,P02783,P22006,Q498R7,Q811M5,Q8K1G0                                                                                                                                                                                                            |
| 236 | 1,2,3,4,6,9<br>,11,12 | 5,7,8,10,1<br>3,14,15,16 | 1  | O35077                                                                                                                                                                                                                                               |
| 237 | 1,2,3,4,6,9<br>,11,13 | 5,7,8,10,1<br>2,14,15,16 | 0  |                                                                                                                                                                                                                                                      |

|     |                        |                          |   |                                           |
|-----|------------------------|--------------------------|---|-------------------------------------------|
| 238 | 1,2,3,4,6,9<br>,11,14  | 5,7,8,10,1<br>2,13,15,16 | 2 | P0DMW0;P0DMW1,Q4KLZ6                      |
| 239 | 1,2,3,4,6,9<br>,11,15  | 5,7,8,10,1<br>2,13,14,16 | 2 | P02091,Q99MH3                             |
| 240 | 1,2,3,4,6,9<br>,11,16  | 5,7,8,10,1<br>2,13,14,15 | 5 | D3ZUC6,P02783,P07647,P22006,Q4KLZ6        |
| 241 | 1,2,3,4,6,9<br>,12,13  | 5,7,8,10,1<br>1,14,15,16 | 0 |                                           |
| 242 | 1,2,3,4,6,9<br>,12,14  | 5,7,8,10,1<br>1,13,15,16 | 0 |                                           |
| 243 | 1,2,3,4,6,9<br>,12,15  | 5,7,8,10,1<br>1,13,14,16 | 1 | Q99MH3                                    |
| 244 | 1,2,3,4,6,9<br>,12,16  | 5,7,8,10,1<br>1,13,14,15 | 5 | D3ZUC6,P02783,P22006,Q09030,Q498R7        |
| 245 | 1,2,3,4,6,9<br>,13,14  | 5,7,8,10,1<br>1,12,15,16 | 1 | Q09030                                    |
| 246 | 1,2,3,4,6,9<br>,13,15  | 5,7,8,10,1<br>1,12,14,16 | 1 | P62804                                    |
| 247 | 1,2,3,4,6,9<br>,13,16  | 5,7,8,10,1<br>1,12,14,15 | 6 | D3ZUC6,P02783,P22006,P23593,Q09030,Q498R7 |
| 248 | 1,2,3,4,6,9<br>,14,15  | 5,7,8,10,1<br>1,12,13,16 | 1 | P02091                                    |
| 249 | 1,2,3,4,6,9<br>,14,16  | 5,7,8,10,1<br>1,12,13,15 | 6 | P02783,P22006,P23593,Q09030,Q498R7,Q4KLZ6 |
| 250 | 1,2,3,4,6,9<br>,15,16  | 5,7,8,10,1<br>1,12,13,14 | 6 | D3ZUC6,P02091,P02783,P22006,P23593,Q498R7 |
| 251 | 1,2,3,4,6,1<br>0,11,12 | 5,7,8,9,13,<br>14,15,16  | 1 | P11762                                    |
| 252 | 1,2,3,4,6,1<br>0,11,13 | 5,7,8,9,12,<br>14,15,16  | 1 | Q68G31                                    |
| 253 | 1,2,3,4,6,1<br>0,11,14 | 5,7,8,9,12,<br>13,15,16  | 1 | Q4KLZ6                                    |
| 254 | 1,2,3,4,6,1<br>0,11,15 | 5,7,8,9,12,<br>13,14,16  | 2 | P02091,Q6IG02                             |
| 255 | 1,2,3,4,6,1<br>0,11,16 | 5,7,8,9,12,<br>13,14,15  | 3 | P02783,P07647,Q4KLZ6                      |
| 256 | 1,2,3,4,6,1<br>0,12,13 | 5,7,8,9,11,<br>14,15,16  | 2 | P11762,P80299                             |
| 257 | 1,2,3,4,6,1<br>0,12,14 | 5,7,8,9,11,<br>13,15,16  | 1 | P11762                                    |

|     |                        |                         |    |                                                                                                                               |
|-----|------------------------|-------------------------|----|-------------------------------------------------------------------------------------------------------------------------------|
| 258 | 1,2,3,4,6,1<br>0,12,15 | 5,7,8,9,11,<br>13,14,16 | 5  | P02091,P10758,P11762,Q498D9,Q63598                                                                                            |
| 259 | 1,2,3,4,6,1<br>0,12,16 | 5,7,8,9,11,<br>13,14,15 | 5  | P02783,P18297,P33436,P46844,Q71MB6                                                                                            |
| 260 | 1,2,3,4,6,1<br>0,13,14 | 5,7,8,9,11,<br>12,15,16 | 2  | O54800;Q5DWV2,Q06000                                                                                                          |
| 261 | 1,2,3,4,6,1<br>0,13,15 | 5,7,8,9,11,<br>12,14,16 | 4  | P02091,Q498D9,Q63618,Q923M1                                                                                                   |
| 262 | 1,2,3,4,6,1<br>0,13,16 | 5,7,8,9,11,<br>12,14,15 | 7  | P02783,P18297,P19468,P28570,P46844,Q63424,Q63618                                                                              |
| 263 | 1,2,3,4,6,1<br>0,14,15 | 5,7,8,9,11,<br>12,13,16 | 3  | P01946,P02091,P54921                                                                                                          |
| 264 | 1,2,3,4,6,1<br>0,14,16 | 5,7,8,9,11,<br>12,13,15 | 5  | P02783,P18297,Q4KLZ6,Q71MB6,Q9QYP1                                                                                            |
| 265 | 1,2,3,4,6,1<br>0,15,16 | 5,7,8,9,11,<br>12,13,14 | 18 | O70377,O70594,P02091,P02783,P17988,P18297,P19468,P46844,P48508,P53790,Q03248,Q63424,Q63598,Q6Q0N1,Q71MB6,Q923M1,Q9QYP1,Q9WTW7 |
| 266 | 1,2,3,4,6,1<br>1,12,13 | 5,7,8,9,10,<br>14,15,16 | 1  | P11762                                                                                                                        |
| 267 | 1,2,3,4,6,1<br>1,12,14 | 5,7,8,9,10,<br>13,15,16 | 3  | P11762,Q4KLZ6,Q5GRG2                                                                                                          |
| 268 | 1,2,3,4,6,1<br>1,12,15 | 5,7,8,9,10,<br>13,14,16 | 2  | P11762,Q6IG02                                                                                                                 |
| 269 | 1,2,3,4,6,1<br>1,12,16 | 5,7,8,9,10,<br>13,14,15 | 5  | O35547,P02783,P05369,P07647,Q4KLZ6                                                                                            |
| 270 | 1,2,3,4,6,1<br>1,13,14 | 5,7,8,9,10,<br>12,15,16 | 3  | B0BNN3,P35745,Q4KLZ6                                                                                                          |
| 271 | 1,2,3,4,6,1<br>1,13,15 | 5,7,8,9,10,<br>12,14,16 | 2  | P21674,Q6IG02                                                                                                                 |
| 272 | 1,2,3,4,6,1<br>1,13,16 | 5,7,8,9,10,<br>12,14,15 | 5  | P02783,P05369,P07647,P35745,Q4KLZ6                                                                                            |
| 273 | 1,2,3,4,6,1<br>1,14,15 | 5,7,8,9,10,<br>12,13,16 | 3  | P02091,Q4KLZ6,Q6IG02                                                                                                          |
| 274 | 1,2,3,4,6,1<br>1,14,16 | 5,7,8,9,10,<br>12,13,15 | 4  | P02783,P07647,P35745,Q4KLZ6                                                                                                   |
| 275 | 1,2,3,4,6,1<br>1,15,16 | 5,7,8,9,10,<br>12,13,14 | 7  | P02091,P02783,P07647,P17988,P29315,Q4KLZ6,Q6IG02                                                                              |
| 276 | 1,2,3,4,6,1<br>2,13,14 | 5,7,8,9,10,<br>11,15,16 | 2  | P11762,P49134                                                                                                                 |
| 277 | 1,2,3,4,6,1<br>2,13,15 | 5,7,8,9,10,<br>11,14,16 | 1  | P11762                                                                                                                        |

|     |                        |                               |    |                                                                                                                                                                                              |
|-----|------------------------|-------------------------------|----|----------------------------------------------------------------------------------------------------------------------------------------------------------------------------------------------|
| 278 | 1,2,3,4,6,1<br>2,13,16 | 5,7,8,9,10,<br>11,14,15       | 1  | P02783                                                                                                                                                                                       |
| 279 | 1,2,3,4,6,1<br>2,14,15 | 5,7,8,9,10,<br>11,13,16       | 1  | P11762                                                                                                                                                                                       |
| 280 | 1,2,3,4,6,1<br>2,14,16 | 5,7,8,9,10,<br>11,13,15       | 2  | P02783,Q4KLZ6                                                                                                                                                                                |
| 281 | 1,2,3,4,6,1<br>2,15,16 | 5,7,8,9,10,<br>11,13,14       | 3  | P02783,P10758,P17988                                                                                                                                                                         |
| 282 | 1,2,3,4,6,1<br>3,14,15 | 5,7,8,9,10,<br>11,12,16       | 1  | P49134                                                                                                                                                                                       |
| 283 | 1,2,3,4,6,1<br>3,14,16 | 5,7,8,9,10,<br>11,12,15       | 4  | B0BNN3,P02783,P35745,Q4KLZ6                                                                                                                                                                  |
| 284 | 1,2,3,4,6,1<br>3,15,16 | 5,7,8,9,10,<br>11,12,14       | 1  | P02783                                                                                                                                                                                       |
| 285 | 1,2,3,4,6,1<br>4,15,16 | 5,7,8,9,10,<br>11,12,13       | 4  | P02091,P02783,P17988,Q4KLZ6                                                                                                                                                                  |
| 286 | 1,2,3,4,7,8<br>,9,10   | 5,6,11,12,<br>13,14,15,1<br>6 | 25 | D4A5U3,O35763,O55004,O70377,O70417,O70594,P00774,P01681,P19223,P20646,P20761,P20766,P23739,P70545,P80299,P97580,Q30KJ2,Q63598,Q63618,Q64093,Q66H69,Q6P6R2,Q6Q0N1,Q8CIZ5,Q9Z1F2               |
| 287 | 1,2,3,4,7,8<br>,9,11   | 5,6,10,12,<br>13,14,15,1<br>6 | 18 | D4A5U3,P00774,P01681,P02780,P08649,P08723,P20646,P35280,P40241,P50280,Q63493,Q66H69,Q6IFU8,Q6P6R2,Q6P6S4,Q812E4,Q8CIZ5,Q9JHB9                                                                |
| 288 | 1,2,3,4,7,8<br>,9,12   | 5,6,10,11,<br>13,14,15,1<br>6 | 8  | D4A5U3,iRT-Kit_WR_fusion,O70417,P00774,P01681,P20646,Q66H69,Q8CIZ5                                                                                                                           |
| 289 | 1,2,3,4,7,8<br>,9,13   | 5,6,10,11,<br>12,14,15,1<br>6 | 10 | B0BNN3,D4A5U3,P00774,P01681,P19223,P20646,P20761,P80299,Q66H69,Q8CIZ5                                                                                                                        |
| 290 | 1,2,3,4,7,8<br>,9,14   | 5,6,10,11,<br>12,13,15,1<br>6 | 14 | B0BNN3,D4A5U3,O70417,P00774,P01681,P08649,P19223,P20646,P20761,P97580,Q5QE79,Q62635,Q63751,Q8CIZ5                                                                                            |
| 291 | 1,2,3,4,7,8<br>,9,15   | 5,6,10,11,<br>12,13,14,1<br>6 | 8  | D4A5U3,P00774,P01681,P20646,P20761,P35280,Q8CIZ5,Q9Z0V6                                                                                                                                      |
| 292 | 1,2,3,4,7,8<br>,9,16   | 5,6,10,11,<br>12,13,14,1<br>5 | 13 | B0BNN3,D4A5U3,P00774,P01681,P19223,P20646,P20761,P23593,P97580,Q30KJ2,Q63317,Q6TMA8,Q8CIZ5                                                                                                   |
| 293 | 1,2,3,4,7,8<br>,10,11  | 5,6,9,12,1<br>3,14,15,16      | 27 | D4A5U3,O55004,P00774,P02780,P02781,P08723,P18757,P19223,P20646,P20761,P20766,P30904,P40241,P50280,P97580,Q10758,Q30KJ2,Q5BJY9,Q63424,Q63493,Q64093,Q66H69,Q6B345,Q6IFU8,Q8CIZ5,Q9JHB9,Q9WTW7 |

|     |                       |                          |    |                                                                                                                                                                                                                                                                                                                                                                                                                                                                                                  |
|-----|-----------------------|--------------------------|----|--------------------------------------------------------------------------------------------------------------------------------------------------------------------------------------------------------------------------------------------------------------------------------------------------------------------------------------------------------------------------------------------------------------------------------------------------------------------------------------------------|
| 294 | 1,2,3,4,7,8<br>,10,12 | 5,6,9,11,1<br>3,14,15,16 | 36 | D4A5U3,O35763,O55004,O70377,O70417,P00774,P10758,P19468,P20766,P30904,P46844,P48508,P53790,P80299,P97580,Q05175,Q30KJ2,Q3ZAV1,Q5M7T9,Q5RLM2,Q63424,Q63598,Q63618,Q64093,Q66H69,Q66HG3,Q6MG61,Q6Q0N1,Q80W57,Q8CIZ5,Q923S2,Q923V8,Q9JJ40,Q9W7,Q9Z0W7,Q9Z1F2                                                                                                                                                                                                                                        |
| 295 | 1,2,3,4,7,8<br>,10,13 | 5,6,9,11,1<br>2,14,15,16 | 47 | B0BNN3,D4A5U3,O35763,O55004,O70257,O70377,O70594,O88339;Q4V882,P00774,P19223,P19468,P20646,P20761,P25809,P28570,P30904,P46844,P48508,P51907,P53790,P57113,P80299,P97580,Q05175,Q30KJ2,Q3ZAV1,Q5I0E9,Q5M7T9,Q62687,Q63355,Q63424,Q63598,Q63618,Q64093,Q66H69,Q6AYQ8,Q6MG61,Q6Q0N1,Q80W57,Q8CIZ5,Q8R431,Q9JJ40,Q9W7,Q9WUW8,Q9WUW9,Q9Z0W7,Q9Z1F2                                                                                                                                                    |
| 296 | 1,2,3,4,7,8<br>,10,14 | 5,6,9,11,1<br>2,13,15,16 | 40 | B0BNN3,D4A5U3,O55004,O70377,O70417,O70594,P18757,P19223,P19468,P20646,P20761,P20762,P46844,P48508,P53790,P54921,P57113,P97580,Q05175,Q30KJ2,Q5I0E9,Q5RLM2,Q62635,Q63355,Q63424,Q63598,Q63618,Q63751,Q64093,Q64319,Q64602,Q66H69,Q6Q0N1,Q80W57,Q8CIZ5,Q923S2,Q9W7,Q9WUW8,Q9WUW9,Q9Z1F2                                                                                                                                                                                                            |
| 297 | 1,2,3,4,7,8<br>,10,15 | 5,6,9,11,1<br>2,13,14,16 | 59 | O35763,O55004,O70377,O70594,O88339;Q4V882,P01681,P10536,P10758,P18757,P19223,P19468,P20646,P20761,P20762,P20766,P29975,P30904,P38918,P46844,P48508,P51907,P53790,P54921,P57113,P68035;P68136,P97580,Q03248,Q05175,Q30KJ2,Q3MIE4,Q3ZAV1,Q5I0E9,Q5M7T9,Q5RKI1,Q62687,Q63270,Q63355,Q63424,Q63598,Q63618,Q64093,Q64319,Q64602,Q66H69,Q6AY41,Q6MG61,Q6Q0N1,Q80W57,Q8CIZ5,Q8R431,Q923S2,Q9JJ19,Q9JJ40,Q9R1T5,Q9W7,Q9WUW7,Q9Z0V6,Q9Z0W7,Q9Z1F2                                                         |
| 298 | 1,2,3,4,7,8<br>,10,16 | 5,6,9,11,1<br>2,13,14,15 | 68 | B0BNN3,D4A5U3,O35763,O55004,O70257,O70377,O70594,P02761,P07151,P18757,P19223,P19468,P20646,P20761,P20762,P20766,P28570,P29975,P38918,P46413,P46720,P46844,P48508,P51907,P53790,P57113,P68035;P68136,P97580,P97608,Q03248,Q05175,Q30KJ2,Q3T1J9,Q3ZAV1,Q5BJY9,Q5I0E9,Q5M7T9,Q5RLM2,Q62687,Q63270,Q63317,Q63355,Q63424,Q63598,Q63618,Q64093,Q64319,Q64602,Q66H69,Q6AY41,Q6AYQ8,Q6MG61,Q6Q0N1,Q6TMA8,Q71MB6,Q80W57,Q8CIZ5,Q8R431,Q923S2,Q9JJ19,Q9JJ40,Q9JLJ3,Q9QYU4,Q9R1T5,Q9W7,Q9WUW8,Q9WUW9,Q9Z0W7 |
| 299 | 1,2,3,4,7,8<br>,11,12 | 5,6,9,10,1<br>3,14,15,16 | 26 | D4A5U3,iRT -<br>Kit_WR_fusion,P00774,P02780,P02781,P02782,P06911,P08723,P22282,P31430,P36374,P40241,P47967,P50280,P70709,Q5GRG2,Q5I0D1,Q5M8C6,Q5PQL7,Q63493,Q66H69,Q6IFU8,Q811M5,Q8CIZ5,Q9JHB9,Q9JI85                                                                                                                                                                                                                                                                                            |
| 300 | 1,2,3,4,7,8<br>,11,13 | 5,6,9,10,1<br>2,14,15,16 | 27 | B0BNN3,D4A5U3,P00774,P02780,P02781,P02782,P06911,P08649,P08723,P19223,P20646,P20761,P22282,P40241,P47967,P80299,Q10758,Q4G075,Q5M8C6,Q62902,Q63493,Q66H69,Q6AYQ8,Q6IFU8,Q811M5,Q8CIZ5,Q9JI85                                                                                                                                                                                                                                                                                                     |
| 301 | 1,2,3,4,7,8<br>,11,14 | 5,6,9,10,1<br>2,13,15,16 | 25 | B0BNN3,D4A5U3,O70417,P02780,P02781,P06911,P08649,P08723,P19223,P20646,P20761,P50280,P97580,Q10758,Q4G075,Q5GRG2,Q5M8C6,Q62635,Q63493,Q63751,Q66H69,Q6IFU8,Q811M5,Q8CIZ5,Q9JHB9                                                                                                                                                                                                                                                                                                                   |
| 302 | 1,2,3,4,7,8<br>,11,15 | 5,6,9,10,1<br>2,13,14,16 | 26 | B0BNN3,D4A5U3,P00774,P01681,P02780,P02781,P08649,P08723,P20646,P20761,P40241,P50280,Q10758,Q4FZU2,Q4G075,Q63493,Q66H69,Q6IFU7,Q6IFU8,Q6IFW6,Q6IG02,Q6IMF3,Q6P6Q2,Q8CIZ5,Q8CJ52,Q9W7                                                                                                                                                                                                                                                                                                              |

|     |                       |                                                                                                                                                                                                                                                                                                                                   |
|-----|-----------------------|-----------------------------------------------------------------------------------------------------------------------------------------------------------------------------------------------------------------------------------------------------------------------------------------------------------------------------------|
|     |                       | B0BNN3,D4A5U3,O35547,P00762,P00774,P02761,P02780,P02781,P02782,P04905,P06911,P07647,P08010,P08649,P08723,P09456,P0C0A9,P16636,P19223,P20646,P20761,P22282,P22283,P2447                                                                                                                                                            |
| 303 | 1,2,3,4,7,8<br>,11,16 | 5,6,9,10,1<br>2,13,14,15                                                                                                                                                                                                                                                                                                          |
| 304 | 1,2,3,4,7,8<br>,12,13 | 5,6,9,10,1<br>1,14,15,16                                                                                                                                                                                                                                                                                                          |
| 305 | 1,2,3,4,7,8<br>,12,14 | 5,6,9,10,1<br>1,13,15,16                                                                                                                                                                                                                                                                                                          |
| 306 | 1,2,3,4,7,8<br>,12,15 | 5,6,9,10,1<br>1,13,14,16                                                                                                                                                                                                                                                                                                          |
| 307 | 1,2,3,4,7,8<br>,12,16 | 5,6,9,10,1<br>1,13,14,15                                                                                                                                                                                                                                                                                                          |
| 308 | 1,2,3,4,7,8<br>,13,14 | 5,6,9,10,1<br>1,12,15,16                                                                                                                                                                                                                                                                                                          |
| 309 | 1,2,3,4,7,8<br>,13,15 | 5,6,9,10,1<br>1,12,14,16                                                                                                                                                                                                                                                                                                          |
| 310 | 1,2,3,4,7,8<br>,13,16 | 5,6,9,10,1<br>1,12,14,15                                                                                                                                                                                                                                                                                                          |
| 311 | 1,2,3,4,7,8<br>,14,15 | 5,6,9,10,1<br>1,12,13,16                                                                                                                                                                                                                                                                                                          |
| 312 | 1,2,3,4,7,8<br>,14,16 | 5,6,9,10,1<br>1,12,13,15                                                                                                                                                                                                                                                                                                          |
| 313 | 1,2,3,4,7,8<br>,15,16 | 5,6,9,10,1<br>1,12,13,14                                                                                                                                                                                                                                                                                                          |
| 314 | 1,2,3,4,7,9<br>,10,11 | 5,6,8,12,1<br>3,14,15,16                                                                                                                                                                                                                                                                                                          |
| 315 | 1,2,3,4,7,9<br>,10,12 | 5,6,8,11,1<br>3,14,15,16                                                                                                                                                                                                                                                                                                          |
| 316 | 1,2,3,4,7,9<br>,10,13 | 5,6,8,11,1<br>2,14,15,16                                                                                                                                                                                                                                                                                                          |
| 317 | 1,2,3,4,7,9<br>,10,14 | 5,6,8,11,1<br>2,13,15,16                                                                                                                                                                                                                                                                                                          |
|     |                       | B0BNN3,D4A5U3,iRT-<br>Kit_WR_fusion,P00774,P19223,P47967,P80299,Q66H69,Q811M5,Q8CIZ5,Q923V8                                                                                                                                                                                                                                       |
|     |                       | B0BNN3,D4A5U3,O70417,P20761,P97580,Q5RLM2,Q62635,Q63751,Q66H69,Q811M5,Q8CIZ5                                                                                                                                                                                                                                                      |
|     |                       | iRT-<br>Kit_WR_fusion,P00774,P10758,P20646,P30904,Q63598,Q66H69,Q6Q0N1,Q8CIZ5,Q9WTW7                                                                                                                                                                                                                                              |
|     |                       | B0BNN3,D4A5U3,iRT-<br>Kit_WR_fusion,P00762,P00774,P02781,P10758,P20646,P20761,P46844,P97580,Q30KJ2,Q63317,Q63598,Q64093,Q66H69,Q6Q0N1,Q6TMA8,Q8CIZ5,Q9JHB9,Q9JJ40,Q9WTW7                                                                                                                                                          |
|     |                       | B0BNN3,D4A5U3,P02761,P19223,P20646,P20761,P25809,P80299,P97580,Q62635,Q66H69,Q6TMA8,Q811M5,Q8CIZ5,Q9WUW8,Q9Z2L0                                                                                                                                                                                                                   |
|     |                       | B0BNN3,D4A5U3,O70377,O70594,P00774,P04916,P19223,P19468,P20646,P20761,P46844,P80299,P97580,Q63598,Q63618,Q64093,Q66H69,Q6AYQ8,Q6Q0N1,Q8CIZ5,Q9WTW7,Q9WUW8                                                                                                                                                                         |
|     |                       | B0BNN3,D4A5U3,O55004,O70257,O70594,P00762,P00774,P02761,P02781,P02782,P07151,P19223,P19468,P20646,P20761,P28570,P46844,P80299,P97580,Q30KJ2,Q3ZAV1,Q62902,Q63317,Q63424,Q63618,Q64093,Q66H69,Q6AYQ8,Q6Q0N1,Q6TMA8,Q8CIZ5,Q9WTW7,Q9WUW8,Q9WUW9,Q9Z0W7                                                                              |
|     |                       | B0BNN3,D4A5U3,O70377,P01681,P08649,P20646,P20761,P20762,P37996,P54921,P97580,Q62635,Q6Q0N1,Q6TMA8,Q8CIZ5,Q9WUW8                                                                                                                                                                                                                   |
|     |                       | B0BNN3,D3ZHA0,D4A5U3,O70417,P02761,P02781,P08649,P19223,P19468,P20646,P20761,P20762,P46844,P97580,Q30KJ2,Q5RLM2,Q62635,Q63317,Q64093,Q6AYQ8,Q6Q0N1,Q6TMA8,Q8CIZ5,Q923S2,Q9WUW8,Q9WUW9                                                                                                                                             |
|     |                       | B0BNN3,B0LT89,D4A5U3,O70377,O70594,P00774,P02761,P04916,P07151,P08649,P09606,P10758,P17988,P19223,P19468,P20646,P20761,P20762,P46844,P48508,P53790,P97580,Q03248,Q05175,Q30KJ2,Q3ZAV1,Q5I0E9,Q5M7T9,Q63270,Q63317,Q63424,Q63598,Q64093,Q6AYQ8,Q6MG61,Q6Q0N1,Q6TMA8,Q80W57,Q8CIZ5,Q8R431,Q923S2,Q9JJ40,Q9R1T5,Q9WTW7,Q9Z0V6,Q9Z0W7 |
|     |                       | 2 P20766,P80299                                                                                                                                                                                                                                                                                                                   |
|     |                       | 2 P10758,P80299                                                                                                                                                                                                                                                                                                                   |
|     |                       | 1 P80299                                                                                                                                                                                                                                                                                                                          |
|     |                       | 2 P80299,Q8K1G0                                                                                                                                                                                                                                                                                                                   |

|     |                        |                          |   |                             |
|-----|------------------------|--------------------------|---|-----------------------------|
| 318 | 1,2,3,4,7,9<br>,10,15  | 5,6,8,11,1<br>2,13,14,16 | 4 | P10758,P80299,Q5RKI1,Q8K1G0 |
| 319 | 1,2,3,4,7,9<br>,10,16  | 5,6,8,11,1<br>2,13,14,15 | 4 | P18297,P20766,P80299,Q8K1G0 |
| 320 | 1,2,3,4,7,9<br>,11,12  | 5,6,8,10,1<br>3,14,15,16 | 1 | P70709                      |
| 321 | 1,2,3,4,7,9<br>,11,13  | 5,6,8,10,1<br>2,14,15,16 | 1 | P80299                      |
| 322 | 1,2,3,4,7,9<br>,11,14  | 5,6,8,10,1<br>2,13,15,16 | 1 | P0DMW0;P0DMW1               |
| 323 | 1,2,3,4,7,9<br>,11,15  | 5,6,8,10,1<br>2,13,14,16 | 3 | P35280,Q6IFW6,Q8CJ52        |
| 324 | 1,2,3,4,7,9<br>,11,16  | 5,6,8,10,1<br>2,13,14,15 | 1 | Q9R168                      |
| 325 | 1,2,3,4,7,9<br>,12,13  | 5,6,8,10,1<br>1,14,15,16 | 1 | P80299                      |
| 326 | 1,2,3,4,7,9<br>,12,14  | 5,6,8,10,1<br>1,13,15,16 | 0 |                             |
| 327 | 1,2,3,4,7,9<br>,12,15  | 5,6,8,10,1<br>1,13,14,16 | 1 | P10758                      |
| 328 | 1,2,3,4,7,9<br>,12,16  | 5,6,8,10,1<br>1,13,14,15 | 1 | P10758                      |
| 329 | 1,2,3,4,7,9<br>,13,14  | 5,6,8,10,1<br>1,12,15,16 | 2 | B0BNN3,P80299               |
| 330 | 1,2,3,4,7,9<br>,13,15  | 5,6,8,10,1<br>1,12,14,16 | 1 | P80299                      |
| 331 | 1,2,3,4,7,9<br>,13,16  | 5,6,8,10,1<br>1,12,14,15 | 3 | B0BNN3,P80299,Q6AYQ8        |
| 332 | 1,2,3,4,7,9<br>,14,15  | 5,6,8,10,1<br>1,12,13,16 | 0 |                             |
| 333 | 1,2,3,4,7,9<br>,14,16  | 5,6,8,10,1<br>1,12,13,15 | 2 | B0BNN3,Q9R168               |
| 334 | 1,2,3,4,7,9<br>,15,16  | 5,6,8,10,1<br>1,12,13,14 | 2 | P10758,Q6AYQ8               |
| 335 | 1,2,3,4,7,1<br>0,11,12 | 5,6,8,9,13,<br>14,15,16  | 3 | P47967,P80299,P97840        |
| 336 | 1,2,3,4,7,1<br>0,11,13 | 5,6,8,9,12,<br>14,15,16  | 4 | B0BNN3,P47967,P80299,Q6AYQ8 |
| 337 | 1,2,3,4,7,1<br>0,11,14 | 5,6,8,9,12,<br>13,15,16  | 0 |                             |

|     |                        |                         |    |                                                                                                                                                                                                                                 |
|-----|------------------------|-------------------------|----|---------------------------------------------------------------------------------------------------------------------------------------------------------------------------------------------------------------------------------|
| 338 | 1,2,3,4,7,1<br>0,11,15 | 5,6,8,9,12,<br>13,14,16 | 4  | Q5RKI1,Q6IFW6,Q6IG02,Q9WTW7                                                                                                                                                                                                     |
| 339 | 1,2,3,4,7,1<br>0,11,16 | 5,6,8,9,12,<br>13,14,15 | 6  | P07647,P20766,Q63424,Q64093,Q6AYQ8,Q9WTW7                                                                                                                                                                                       |
| 340 | 1,2,3,4,7,1<br>0,12,13 | 5,6,8,9,11,<br>14,15,16 | 4  | P10758,P47967,P80299,P97840                                                                                                                                                                                                     |
| 341 | 1,2,3,4,7,1<br>0,12,14 | 5,6,8,9,11,<br>13,15,16 | 2  | P80299,Q5RLM2                                                                                                                                                                                                                   |
| 342 | 1,2,3,4,7,1<br>0,12,15 | 5,6,8,9,11,<br>13,14,16 | 7  | P10758,P18297,P80299,Q5RKI1,Q63598,Q64093,Q9WTW7                                                                                                                                                                                |
| 343 | 1,2,3,4,7,1<br>0,12,16 | 5,6,8,9,11,<br>13,14,15 | 11 | P10758,P18297,P19468,P46844,P80299,Q63424,Q63598,Q64093,Q71MB6,Q9JJ40,Q9WTW7                                                                                                                                                    |
| 344 | 1,2,3,4,7,1<br>0,13,14 | 5,6,8,9,11,<br>12,15,16 | 3  | B0BNN3,P80299,Q9WUW8                                                                                                                                                                                                            |
| 345 | 1,2,3,4,7,1<br>0,13,15 | 5,6,8,9,11,<br>12,14,16 | 15 | P10758,P18297,P19468,P51907,P63095,P80299,Q5RKI1,Q63424,Q63598,Q63618,Q64093,Q6AYQ8,Q6Q0N1,Q923M1,Q9WTW7                                                                                                                        |
| 346 | 1,2,3,4,7,1<br>0,13,16 | 5,6,8,9,11,<br>12,14,15 | 18 | B0BNN3,P02761,P18297,P19468,P28570,P46844,P63095,P80299,Q63424,Q63618,Q64093,Q6AYQ8,Q6Q0N1,Q80W57,Q923M1,Q9JJ40,Q9WTW7,Q9WUW8                                                                                                   |
| 347 | 1,2,3,4,7,1<br>0,14,15 | 5,6,8,9,11,<br>12,13,16 | 5  | P18297,P19468,P54921,P63095,Q5RKI1                                                                                                                                                                                              |
| 348 | 1,2,3,4,7,1<br>0,14,16 | 5,6,8,9,11,<br>12,13,15 | 14 | B0BNN3,P02761,P18297,P19468,P46844,P57113,Q63424,Q64093,Q6AYQ8,Q71MB6,Q923S2,Q9QYP1,Q9WUW8,Q9WUW9                                                                                                                               |
| 349 | 1,2,3,4,7,1<br>0,15,16 | 5,6,8,9,11,<br>12,13,14 | 32 | O70377,O70594,P10758,P17988,P18297,P19468,P29975,P46844,P48508,P51907,P53790,P63095,Q03248,Q5I0E9,Q5RKI1,Q63270,Q63355,Q63424,Q63598,Q63618,Q64093,Q6AYQ8,Q6MG61,Q6Q0N1,Q71MB6,Q80W57,Q8R431,Q923M1,Q9JJ40,Q9QYP1,Q9WTW7,Q9Z0W7 |
| 350 | 1,2,3,4,7,1<br>1,12,13 | 5,6,8,9,10,<br>14,15,16 | 5  | P47967,P80299,P97840,Q5I0D1,Q811M5                                                                                                                                                                                              |
| 351 | 1,2,3,4,7,1<br>1,12,14 | 5,6,8,9,10,<br>13,15,16 | 1  | Q811M5                                                                                                                                                                                                                          |
| 352 | 1,2,3,4,7,1<br>1,12,15 | 5,6,8,9,10,<br>13,14,16 | 3  | P10758,Q6IFW6,Q6IG02                                                                                                                                                                                                            |
| 353 | 1,2,3,4,7,1<br>1,12,16 | 5,6,8,9,10,<br>13,14,15 | 4  | P05369,P07647,P97840,Q9JHB9                                                                                                                                                                                                     |
| 354 | 1,2,3,4,7,1<br>1,13,14 | 5,6,8,9,10,<br>12,15,16 | 3  | B0BNN3,P80299,Q811M5                                                                                                                                                                                                            |
| 355 | 1,2,3,4,7,1<br>1,13,15 | 5,6,8,9,10,<br>12,14,16 | 6  | B0BNN3,P25031,P80299,Q6AYQ8,Q6IFW6,Q6IG02                                                                                                                                                                                       |
| 356 | 1,2,3,4,7,1<br>1,13,16 | 5,6,8,9,10,<br>12,14,15 | 9  | B0BNN3,P02761,P02781,P02782,P05369,P07647,P80299,Q08463,Q6AYQ8                                                                                                                                                                  |
| 357 | 1,2,3,4,7,1<br>1,14,15 | 5,6,8,9,10,<br>12,13,16 | 6  | B0BNN3,P08649,P25031,Q6IFW6,Q6IG02,Q8CJ52                                                                                                                                                                                       |



|     |                        |                          |                                                                  |
|-----|------------------------|--------------------------|------------------------------------------------------------------|
| 358 | 1,2,3,4,7,1<br>1,14,16 | 5,6,8,9,10,<br>12,13,15  | 6 B0BNN3,P02761,P07647,P08649,Q4KLZ6,Q6AYQ8                      |
| 359 | 1,2,3,4,7,1<br>1,15,16 | 5,6,8,9,10,<br>12,13,14  | 9 P02761,P08649,P17988,P29315,Q4FZU2,Q6AYQ8,Q6IFW6,Q6IG02,Q8CJ52 |
| 360 | 1,2,3,4,7,1<br>2,13,14 | 5,6,8,9,10,<br>11,15,16  | 3 B0BNN3,P80299,Q811M5                                           |
| 361 | 1,2,3,4,7,1<br>2,13,15 | 5,6,8,9,10,<br>11,14,16  | 2 P10758,P80299                                                  |
| 362 | 1,2,3,4,7,1<br>2,13,16 | 5,6,8,9,10,<br>11,14,15  | 5 B0BNN3,P10758,P80299,P97840,Q6AYQ8                             |
| 363 | 1,2,3,4,7,1<br>2,14,15 | 5,6,8,9,10,<br>11,13,16  | 0                                                                |
| 364 | 1,2,3,4,7,1<br>2,14,16 | 5,6,8,9,10,<br>11,13,15  | 1 B0BNN3                                                         |
| 365 | 1,2,3,4,7,1<br>2,15,16 | 5,6,8,9,10,<br>11,13,14  | 2 P10758,P17988                                                  |
| 366 | 1,2,3,4,7,1<br>3,14,15 | 5,6,8,9,10,<br>11,12,16  | 2 B0BNN3,P80299                                                  |
| 367 | 1,2,3,4,7,1<br>3,14,16 | 5,6,8,9,10,<br>11,12,15  | 5 B0BNN3,P02761,P80299,Q6AYQ8,Q9WUW8                             |
| 368 | 1,2,3,4,7,1<br>3,15,16 | 5,6,8,9,10,<br>11,12,14  | 8 B0BNN3,P02761,P10758,P18297,P19468,P80299,Q64093,Q6AYQ8        |
| 369 | 1,2,3,4,7,1<br>4,15,16 | 5,6,8,9,10,<br>11,12,13  | 6 B0BNN3,B0LT89,P02761,P17988,P18297,Q6AYQ8                      |
| 370 | 1,2,3,4,8,9<br>,10,11  | 5,6,7,12,1<br>3,14,15,16 | 4 P00774,P01681,P97580,Q6P6S4                                    |
| 371 | 1,2,3,4,8,9<br>,10,12  | 5,6,7,11,1<br>3,14,15,16 | 2 P00774,P01681                                                  |
| 372 | 1,2,3,4,8,9<br>,10,13  | 5,6,7,11,1<br>2,14,15,16 | 4 P00774,P97580,Q30KJ2,Q63618                                    |
| 373 | 1,2,3,4,8,9<br>,10,14  | 5,6,7,11,1<br>2,13,15,16 | 4 O70417,P01681,P97580,Q30KJ2                                    |
| 374 | 1,2,3,4,8,9<br>,10,15  | 5,6,7,11,1<br>2,13,14,16 | 5 P00774,P01681,P36376,P97580,Q30KJ2                             |
| 375 | 1,2,3,4,8,9<br>,10,16  | 5,6,7,11,1<br>2,13,14,15 | 4 P00774,P01681,P97580,Q30KJ2                                    |
| 376 | 1,2,3,4,8,9<br>,11,12  | 5,6,7,10,1<br>3,14,15,16 | 5 O88797,P00774,P01681,Q64335,Q6Q7Y5                             |
| 377 | 1,2,3,4,8,9<br>,11,13  | 5,6,7,10,1<br>2,14,15,16 | 4 B0BNN3,P00774,P01681,Q64335                                    |

|     |                        |                          |    |                                                                                     |
|-----|------------------------|--------------------------|----|-------------------------------------------------------------------------------------|
| 378 | 1,2,3,4,8,9<br>,11,14  | 5,6,7,10,1<br>2,13,15,16 | 2  | P00774,P01681                                                                       |
| 379 | 1,2,3,4,8,9<br>,11,15  | 5,6,7,10,1<br>2,13,14,16 | 12 | P00774,P01681,P36376,Q10758,Q4FZU2,Q6IFU7,Q6IFU8,Q6IFW6,Q6IG02,Q6IMF3,Q6P6Q2,Q6P6S4 |
| 380 | 1,2,3,4,8,9<br>,11,16  | 5,6,7,10,1<br>2,13,14,15 | 8  | O88797,P00762,P00774,P01681,P02782,Q10758,Q30KJ2,Q812E4                             |
| 381 | 1,2,3,4,8,9<br>,12,13  | 5,6,7,10,1<br>1,14,15,16 | 1  | P00774                                                                              |
| 382 | 1,2,3,4,8,9<br>,12,14  | 5,6,7,10,1<br>1,13,15,16 | 2  | O70417,P01681                                                                       |
| 383 | 1,2,3,4,8,9<br>,12,15  | 5,6,7,10,1<br>1,13,14,16 | 4  | P00774,P01681,P34901,P36376                                                         |
| 384 | 1,2,3,4,8,9<br>,12,16  | 5,6,7,10,1<br>1,13,14,15 | 2  | P00774,Q30KJ2                                                                       |
| 385 | 1,2,3,4,8,9<br>,13,14  | 5,6,7,10,1<br>1,12,15,16 | 2  | B0BNN3,P97580                                                                       |
| 386 | 1,2,3,4,8,9<br>,13,15  | 5,6,7,10,1<br>1,12,14,16 | 2  | P00774,P01681                                                                       |
| 387 | 1,2,3,4,8,9<br>,13,16  | 5,6,7,10,1<br>1,12,14,15 | 5  | B0BNN3,P00774,P23593,P97580,Q30KJ2                                                  |
| 388 | 1,2,3,4,8,9<br>,14,15  | 5,6,7,10,1<br>1,12,13,16 | 4  | P01681,P23593,P36376,P97580                                                         |
| 389 | 1,2,3,4,8,9<br>,14,16  | 5,6,7,10,1<br>1,12,13,15 | 5  | B0BNN3,P01681,P23593,P97580,Q30KJ2                                                  |
| 390 | 1,2,3,4,8,9<br>,15,16  | 5,6,7,10,1<br>1,12,13,14 | 6  | P00774,P01681,P23593,P29315,P97580,Q30KJ2                                           |
| 391 | 1,2,3,4,8,1<br>0,11,12 | 5,6,7,9,13,<br>14,15,16  | 2  | P97580,Q10758                                                                       |
| 392 | 1,2,3,4,8,1<br>0,11,13 | 5,6,7,9,12,<br>14,15,16  | 5  | B0BNN3,P97580,Q10758,Q30KJ2,Q66H69                                                  |
| 393 | 1,2,3,4,8,1<br>0,11,14 | 5,6,7,9,12,<br>13,15,16  | 4  | B0BNN3,P97580,Q10758,Q30KJ2                                                         |
| 394 | 1,2,3,4,8,1<br>0,11,15 | 5,6,7,9,12,<br>13,14,16  | 10 | P97580,Q10758,Q30KJ2,Q4FZU2,Q6IFU7,Q6IFU8,Q6IFW6,Q6IG02,Q6IMF3,Q6P6Q2               |
| 395 | 1,2,3,4,8,1<br>0,11,16 | 5,6,7,9,12,<br>13,14,15  | 8  | P00762,P02782,P15399,P97580,Q10758,Q30KJ2,Q5BJY9,Q6IFU8                             |
| 396 | 1,2,3,4,8,1<br>0,12,13 | 5,6,7,9,11,<br>14,15,16  | 4  | P97580,Q30KJ2,Q63618,Q66H69                                                         |
| 397 | 1,2,3,4,8,1<br>0,12,14 | 5,6,7,9,11,<br>13,15,16  | 4  | O70417,P97580,Q30KJ2,Q5RLM2                                                         |

|     |                        |                         |    |                                                                                                                                                           |
|-----|------------------------|-------------------------|----|-----------------------------------------------------------------------------------------------------------------------------------------------------------|
| 398 | 1,2,3,4,8,1<br>0,12,15 | 5,6,7,9,11,<br>13,14,16 | 6  | P10758,P34901,P97580,Q30KJ2,Q498D9,Q63598                                                                                                                 |
| 399 | 1,2,3,4,8,1<br>0,12,16 | 5,6,7,9,11,<br>13,14,15 | 8  | P0DMW0;P0DMW1,P10758,P46844,P97580,Q30KJ2,Q63598,Q64093,Q9WTW7                                                                                            |
| 400 | 1,2,3,4,8,1<br>0,13,14 | 5,6,7,9,11,<br>12,15,16 | 4  | B0BNN3,P97580,Q30KJ2,Q9WUW8                                                                                                                               |
| 401 | 1,2,3,4,8,1<br>0,13,15 | 5,6,7,9,11,<br>12,14,16 | 9  | O70377,O88339;Q4V882,P97580,Q30KJ2,Q498D9,Q63598,Q63618,Q64093,Q6Q0N1                                                                                     |
| 402 | 1,2,3,4,8,1<br>0,13,16 | 5,6,7,9,11,<br>12,14,15 | 16 | B0BNN3,O55004,O70377,P00762,P07151,P15399,P19468,P28570,P46844,P97580,Q30KJ2,Q63424,Q63618,Q64093,Q6Q0N1,Q9WUW8                                           |
| 403 | 1,2,3,4,8,1<br>0,14,15 | 5,6,7,9,11,<br>12,13,16 | 4  | O70377,P54921,P97580,Q30KJ2                                                                                                                               |
| 404 | 1,2,3,4,8,1<br>0,14,16 | 5,6,7,9,11,<br>12,13,15 | 7  | B0BNN3,O70377,P15399,P46844,P97580,Q30KJ2,Q9WUW8                                                                                                          |
| 405 | 1,2,3,4,8,1<br>0,15,16 | 5,6,7,9,11,<br>12,13,14 | 22 | O70377,O70594,P07151,P10758,P15399,P19468,P46844,P48508,P53790,P97580,Q05175,Q30KJ2,Q3ZAV1,Q63424,Q63598,Q63618,Q64093,Q6Q0N1,Q80W57,Q8R431,Q9WTW7,Q9Z0W7 |
| 406 | 1,2,3,4,8,1<br>1,12,13 | 5,6,7,9,10,<br>14,15,16 | 5  | B0BNN3,P00774,Q64335,Q66H69,Q811M5                                                                                                                        |
| 407 | 1,2,3,4,8,1<br>1,12,14 | 5,6,7,9,10,<br>13,15,16 | 2  | P11883,Q811M5                                                                                                                                             |
| 408 | 1,2,3,4,8,1<br>1,12,15 | 5,6,7,9,10,<br>13,14,16 | 9  | P00774,Q10758,Q4FZU2,Q6IFU7,Q6IFU8,Q6IFW6,Q6IG02,Q6IMF3,Q6P6Q2                                                                                            |
| 409 | 1,2,3,4,8,1<br>1,12,16 | 5,6,7,9,10,<br>13,14,15 | 9  | P00762,P00774,P02781,P02782,P08723,P30120,Q10758,Q6IFU8,Q9JHB9                                                                                            |
| 410 | 1,2,3,4,8,1<br>1,13,14 | 5,6,7,9,10,<br>12,15,16 | 6  | B0BNN3,O54728,P97580,Q10758,Q64335,Q811M5                                                                                                                 |
| 411 | 1,2,3,4,8,1<br>1,13,15 | 5,6,7,9,10,<br>12,14,16 | 10 | B0BNN3,P00774,Q10758,Q4FZU2,Q6IFU7,Q6IFU8,Q6IFW6,Q6IG02,Q6IMF3,Q6P6Q2                                                                                     |
| 412 | 1,2,3,4,8,1<br>1,13,16 | 5,6,7,9,10,<br>12,14,15 | 11 | B0BNN3,P00762,P00774,P02781,P02782,P08723,P30120,P97580,Q10758,Q30KJ2,Q6IFU8                                                                              |
| 413 | 1,2,3,4,8,1<br>1,14,15 | 5,6,7,9,10,<br>12,13,16 | 10 | B0BNN3,P97580,Q10758,Q4FZU2,Q6IFU7,Q6IFU8,Q6IFW6,Q6IG02,Q6IMF3,Q6P6Q2                                                                                     |
| 414 | 1,2,3,4,8,1<br>1,14,16 | 5,6,7,9,10,<br>12,13,15 | 10 | B0BNN3,O54728,P00762,P02782,P30120,P97580,Q10758,Q30KJ2,Q4KLZ6,Q6IFU8                                                                                     |
| 415 | 1,2,3,4,8,1<br>1,15,16 | 5,6,7,9,10,<br>12,13,14 | 15 | P00762,P00774,P02782,P29315,P50280,P97580,Q10758,Q30KJ2,Q4FZU2,Q6IFU7,Q6IFU8,Q6IFW6,Q6IG02,Q6IMF3,Q6P6Q2                                                  |
| 416 | 1,2,3,4,8,1<br>2,13,14 | 5,6,7,9,10,<br>11,15,16 | 3  | B0BNN3,P97580,Q811M5                                                                                                                                      |
| 417 | 1,2,3,4,8,1<br>2,13,15 | 5,6,7,9,10,<br>11,14,16 | 1  | P00774                                                                                                                                                    |

|     |                        |                         |                                             |
|-----|------------------------|-------------------------|---------------------------------------------|
| 418 | 1,2,3,4,8,1<br>2,13,16 | 5,6,7,9,10,<br>11,14,15 | 5 B0BNN3,P00762,P00774,P97580,Q30KJ2        |
| 419 | 1,2,3,4,8,1<br>2,14,15 | 5,6,7,9,10,<br>11,13,16 | 1 P97580                                    |
| 420 | 1,2,3,4,8,1<br>2,14,16 | 5,6,7,9,10,<br>11,13,15 | 4 B0BNN3,P00762,P97580,Q30KJ2               |
| 421 | 1,2,3,4,8,1<br>2,15,16 | 5,6,7,9,10,<br>11,13,14 | 4 P00762,P10758,P97580,Q30KJ2               |
| 422 | 1,2,3,4,8,1<br>3,14,15 | 5,6,7,9,10,<br>11,12,16 | 2 B0BNN3,P97580                             |
| 423 | 1,2,3,4,8,1<br>3,14,16 | 5,6,7,9,10,<br>11,12,15 | 6 B0BNN3,O54728,P00762,P97580,Q30KJ2,Q9WUW8 |
| 424 | 1,2,3,4,8,1<br>3,15,16 | 5,6,7,9,10,<br>11,12,14 | 5 B0BNN3,P00762,P97580,Q30KJ2,Q6AYQ8        |
| 425 | 1,2,3,4,8,1<br>4,15,16 | 5,6,7,9,10,<br>11,12,13 | 4 B0BNN3,P00762,P97580,Q30KJ2               |
| 426 | 1,2,3,4,9,1<br>0,11,12 | 5,6,7,8,13,<br>14,15,16 | 1 Q62714                                    |
| 427 | 1,2,3,4,9,1<br>0,11,13 | 5,6,7,8,12,<br>14,15,16 | 0                                           |
| 428 | 1,2,3,4,9,1<br>0,11,14 | 5,6,7,8,12,<br>13,15,16 | 0                                           |
| 429 | 1,2,3,4,9,1<br>0,11,15 | 5,6,7,8,12,<br>13,14,16 | 0                                           |
| 430 | 1,2,3,4,9,1<br>0,11,16 | 5,6,7,8,12,<br>13,14,15 | 1 D3ZUC6                                    |
| 431 | 1,2,3,4,9,1<br>0,12,13 | 5,6,7,8,11,<br>14,15,16 | 2 Q99041,Q9QZK9                             |
| 432 | 1,2,3,4,9,1<br>0,12,14 | 5,6,7,8,11,<br>13,15,16 | 2 P01041,Q99041                             |
| 433 | 1,2,3,4,9,1<br>0,12,15 | 5,6,7,8,11,<br>13,14,16 | 6 P09456,P10758,P30120,P34901,P46462,Q99041 |
| 434 | 1,2,3,4,9,1<br>0,12,16 | 5,6,7,8,11,<br>13,14,15 | 3 D3ZUC6,P10758,Q99041                      |
| 435 | 1,2,3,4,9,1<br>0,13,14 | 5,6,7,8,11,<br>12,15,16 | 0                                           |
| 436 | 1,2,3,4,9,1<br>0,13,15 | 5,6,7,8,11,<br>12,14,16 | 1 Q8CFN2                                    |
| 437 | 1,2,3,4,9,1<br>0,13,16 | 5,6,7,8,11,<br>12,14,15 | 1 D3ZUC6                                    |

|     |                        |                         |   |                                    |
|-----|------------------------|-------------------------|---|------------------------------------|
| 438 | 1,2,3,4,9,1<br>0,14,15 | 5,6,7,8,11,<br>12,13,16 | 3 | P09456,P30120,P46462               |
| 439 | 1,2,3,4,9,1<br>0,14,16 | 5,6,7,8,11,<br>12,13,15 | 0 |                                    |
| 440 | 1,2,3,4,9,1<br>0,15,16 | 5,6,7,8,11,<br>12,13,14 | 4 | D3ZUC6,P10758,P29315,Q8K1G0        |
| 441 | 1,2,3,4,9,1<br>1,12,13 | 5,6,7,8,10,<br>14,15,16 | 3 | O35077,Q62761;Q62762;Q62763,Q64335 |
| 442 | 1,2,3,4,9,1<br>1,12,14 | 5,6,7,8,10,<br>13,15,16 | 2 | O35077,Q64335                      |
| 443 | 1,2,3,4,9,1<br>1,12,15 | 5,6,7,8,10,<br>13,14,16 | 1 | Q62761;Q62762;Q62763               |
| 444 | 1,2,3,4,9,1<br>1,12,16 | 5,6,7,8,10,<br>13,14,15 | 1 | D3ZUC6                             |
| 445 | 1,2,3,4,9,1<br>1,13,14 | 5,6,7,8,10,<br>12,15,16 | 3 | B0BNN3,P0DMW0;P0DMW1,Q64335        |
| 446 | 1,2,3,4,9,1<br>1,13,15 | 5,6,7,8,10,<br>12,14,16 | 1 | P25031                             |
| 447 | 1,2,3,4,9,1<br>1,13,16 | 5,6,7,8,10,<br>12,14,15 | 1 | D3ZUC6                             |
| 448 | 1,2,3,4,9,1<br>1,14,15 | 5,6,7,8,10,<br>12,13,16 | 2 | P0DMW0;P0DMW1,P25031               |
| 449 | 1,2,3,4,9,1<br>1,14,16 | 5,6,7,8,10,<br>12,13,15 | 1 | Q4KLZ6                             |
| 450 | 1,2,3,4,9,1<br>1,15,16 | 5,6,7,8,10,<br>12,13,14 | 2 | D3ZUC6,P29315                      |
| 451 | 1,2,3,4,9,1<br>2,13,14 | 5,6,7,8,10,<br>11,15,16 | 0 |                                    |
| 452 | 1,2,3,4,9,1<br>2,13,15 | 5,6,7,8,10,<br>11,14,16 | 1 | Q99041                             |
| 453 | 1,2,3,4,9,1<br>2,13,16 | 5,6,7,8,10,<br>11,14,15 | 0 |                                    |
| 454 | 1,2,3,4,9,1<br>2,14,15 | 5,6,7,8,10,<br>11,13,16 | 1 | Q99041                             |
| 455 | 1,2,3,4,9,1<br>2,14,16 | 5,6,7,8,10,<br>11,13,15 | 0 |                                    |
| 456 | 1,2,3,4,9,1<br>2,15,16 | 5,6,7,8,10,<br>11,13,14 | 3 | P10758,P29315,Q99041               |
| 457 | 1,2,3,4,9,1<br>3,14,15 | 5,6,7,8,10,<br>11,12,16 | 0 |                                    |

|     |                         |                         |                        |
|-----|-------------------------|-------------------------|------------------------|
| 458 | 1,2,3,4,9,1<br>3,14,16  | 5,6,7,8,10,<br>11,12,15 | 2 B0BNN3,P23593        |
| 459 | 1,2,3,4,9,1<br>3,15,16  | 5,6,7,8,10,<br>11,12,14 | 1 P29315               |
| 460 | 1,2,3,4,9,1<br>4,15,16  | 5,6,7,8,10,<br>11,12,13 | 2 P23593,P29315        |
| 461 | 1,2,3,4,10,<br>11,12,13 | 5,6,7,8,9,1<br>4,15,16  | 0                      |
| 462 | 1,2,3,4,10,<br>11,12,14 | 5,6,7,8,9,1<br>3,15,16  | 0                      |
| 463 | 1,2,3,4,10,<br>11,12,15 | 5,6,7,8,9,1<br>3,14,16  | 1 Q6IG02               |
| 464 | 1,2,3,4,10,<br>11,12,16 | 5,6,7,8,9,1<br>3,14,15  | 0                      |
| 465 | 1,2,3,4,10,<br>11,13,14 | 5,6,7,8,9,1<br>2,15,16  | 2 B0BNN3,P35745        |
| 466 | 1,2,3,4,10,<br>11,13,15 | 5,6,7,8,9,1<br>2,14,16  | 1 Q6IG02               |
| 467 | 1,2,3,4,10,<br>11,13,16 | 5,6,7,8,9,1<br>2,14,15  | 2 P35745,Q6AYQ8        |
| 468 | 1,2,3,4,10,<br>11,14,15 | 5,6,7,8,9,1<br>2,13,16  | 1 Q6IG02               |
| 469 | 1,2,3,4,10,<br>11,14,16 | 5,6,7,8,9,1<br>2,13,15  | 2 P35745,Q4KLZ6        |
| 470 | 1,2,3,4,10,<br>11,15,16 | 5,6,7,8,9,1<br>2,13,14  | 3 P29315,Q6IFW6,Q6IG02 |
| 471 | 1,2,3,4,10,<br>12,13,14 | 5,6,7,8,9,1<br>1,15,16  | 0                      |
| 472 | 1,2,3,4,10,<br>12,13,15 | 5,6,7,8,9,1<br>1,14,16  | 3 P06760,P10758,Q812E4 |
| 473 | 1,2,3,4,10,<br>12,13,16 | 5,6,7,8,9,1<br>1,14,15  | 2 P06760,P10758        |
| 474 | 1,2,3,4,10,<br>12,14,15 | 5,6,7,8,9,1<br>1,13,16  | 1 P09456               |
| 475 | 1,2,3,4,10,<br>12,14,16 | 5,6,7,8,9,1<br>1,13,15  | 0                      |
| 476 | 1,2,3,4,10,<br>12,15,16 | 5,6,7,8,9,1<br>1,13,14  | 3 P06760,P10758,P29315 |
| 477 | 1,2,3,4,10,<br>13,14,15 | 5,6,7,8,9,1<br>1,12,16  | 1 Q8CFN2               |

|     |                                                  |                                                                                                                                                                                                   |
|-----|--------------------------------------------------|---------------------------------------------------------------------------------------------------------------------------------------------------------------------------------------------------|
| 478 | 1,2,3,4,10, 5,6,7,8,9,1<br>13,14,16 1,12,15      | 1 B0BNN3                                                                                                                                                                                          |
| 479 | 1,2,3,4,10, 5,6,7,8,9,1<br>13,15,16 1,12,14      | 5 P06760,P10758,P29315,Q64093,Q6AYQ8                                                                                                                                                              |
| 480 | 1,2,3,4,10, 5,6,7,8,9,1<br>14,15,16 1,12,13      | 2 P29315,Q9QYP1                                                                                                                                                                                   |
| 481 | 1,2,3,4,11, 5,6,7,8,9,1<br>12,13,14 0,15,16      | 4 B0BNN3,P35745,Q64335,Q811M5                                                                                                                                                                     |
| 482 | 1,2,3,4,11, 5,6,7,8,9,1<br>12,13,15 0,14,16      | 2 P25031,Q6IG02                                                                                                                                                                                   |
| 483 | 1,2,3,4,11, 5,6,7,8,9,1<br>12,13,16 0,14,15      | 2 P05369,P35745                                                                                                                                                                                   |
| 484 | 1,2,3,4,11, 5,6,7,8,9,1<br>12,14,15 0,13,16      | 2 P25031,Q6IG02                                                                                                                                                                                   |
| 485 | 1,2,3,4,11, 5,6,7,8,9,1<br>12,14,16 0,13,15      | 2 P35745,Q4KLZ6                                                                                                                                                                                   |
| 486 | 1,2,3,4,11, 5,6,7,8,9,1<br>12,15,16 0,13,14      | 3 P29315,Q6IFW6,Q6IG02                                                                                                                                                                            |
| 487 | 1,2,3,4,11, 5,6,7,8,9,1<br>13,14,15 0,12,16      | 3 B0BNN3,P25031,Q6IG02                                                                                                                                                                            |
| 488 | 1,2,3,4,11, 5,6,7,8,9,1<br>13,14,16 0,12,15      | 4 B0BNN3,O54728,P35745,Q4KLZ6                                                                                                                                                                     |
| 489 | 1,2,3,4,11, 5,6,7,8,9,1<br>13,15,16 0,12,14      | 3 P29315,Q6AYQ8,Q6IG02                                                                                                                                                                            |
| 490 | 1,2,3,4,11, 5,6,7,8,9,1<br>14,15,16 0,12,13      | 5 P25031,P29315,Q4KLZ6,Q6IFW6,Q6IG02                                                                                                                                                              |
| 491 | 1,2,3,4,12, 5,6,7,8,9,1<br>13,14,15 0,11,16      | 0                                                                                                                                                                                                 |
| 492 | 1,2,3,4,12, 5,6,7,8,9,1<br>13,14,16 0,11,15      | 1 B0BNN3                                                                                                                                                                                          |
| 493 | 1,2,3,4,12, 5,6,7,8,9,1<br>13,15,16 0,11,14      | 3 P06760,P10758,P29315                                                                                                                                                                            |
| 494 | 1,2,3,4,12, 5,6,7,8,9,1<br>14,15,16 0,11,13      | 1 P29315                                                                                                                                                                                          |
| 495 | 1,2,3,4,13, 5,6,7,8,9,1<br>14,15,16 0,11,12      | 2 B0BNN3,P29315                                                                                                                                                                                   |
| 496 | 1,2,3,5,6,7, 4,10,11,12<br>,8,9 ,13,14,15,<br>16 | iRT-<br>24 Kit_WR_fusion,O70594,P06760,P08649,P08937,P10247,P19629,P23928,P36860,P48508,P50115,<br>P50116,P52590,P55091,Q09030,Q4FZU6,Q5QE79,Q5U2V4,Q62714,Q62812,Q63317,Q6IG05,Q<br>920G2,Q9QX74 |

|     |                      |                               |    |                                                                                                                                                                                                                                                                                                                                                                                                                                                                                                                                                                                                                                                               |
|-----|----------------------|-------------------------------|----|---------------------------------------------------------------------------------------------------------------------------------------------------------------------------------------------------------------------------------------------------------------------------------------------------------------------------------------------------------------------------------------------------------------------------------------------------------------------------------------------------------------------------------------------------------------------------------------------------------------------------------------------------------------|
| 497 | 1,2,3,5,6,7<br>,8,10 | 4,9,11,12,<br>13,14,15,1<br>6 | 86 | iRT-<br>Kit_WR_fusion,O08557,O35763,O70257,O70377,O70594,O88339;Q4V882,P01836,P02631,P04904,P08937,P10247,P10536,P10760,P18757,P19468,P19629,P20766,P23928,P25031,P29975,P30904,P31044,P36860,P36970,P38918,P46720,P46844,P48037,P48508,P50115,P50116,P51907,P52590,P53790,P54921,P55091,P57113,P60711,P63259,P63081,P68035,P68136,P97580,P97605,Q03248,Q05175,Q3T1J9,Q3ZAV1,Q5I0E9,Q5M7T9,Q5RLM2,Q62687,Q62714,Q62812,Q63270,Q63317,Q63355,Q63424,Q63598,Q63618,Q64093,Q64602,Q66H69,Q66HG3,Q68FT5,Q6AY41,Q6AYS7,Q6IG05,Q6MG61,Q6Q0N1,Q71MB6,Q80W57,Q8K3P7,Q8R431,Q91ZS3,Q920G2,Q923S2,Q99MZ8,Q9JJ19,Q9JJ40,Q9JLJ3,Q9QX74,Q9QYU4,Q9WTW7,Q9WUW8,Q9WUW9,Q9Z0W7 |
| 498 | 1,2,3,5,6,7<br>,8,11 | 4,9,10,12,<br>13,14,15,1<br>6 | 39 | iRT-<br>Kit_WR_fusion,O08557,P02780,P06760,P06761,P06911,P08649,P08721,P08723,P08937,P09456,P10247,P12020,P18757,P19629,P22283,P31044,P31430,P47967,P50115,P50116,P50280,P52590,P55091,P63029,Q5GRG2,Q5M8C6,Q5U2V4,Q62812,Q63493,Q66H69,Q6IFU7,Q6IG05,Q6IMF3,Q6Q0N0,Q920G2,Q9JHB9,Q9JI85,Q9QX74                                                                                                                                                                                                                                                                                                                                                               |
| 499 | 1,2,3,5,6,7<br>,8,12 | 4,9,10,11,<br>13,14,15,1<br>6 | 30 | iRT-<br>Kit_WR_fusion,P06911,P08937,P10247,P19629,P19814,P30904,P31044,P36860,P38918,P46844,P47967,P48508,P50115,P50116,P52590,P55091,P57113,Q5RLM2,Q62714,Q63270,Q64602,Q66H69,Q66HG3,Q6IG05,Q6Q0N1,Q91ZS3,Q920G2,Q9QX74,Q9WUW8                                                                                                                                                                                                                                                                                                                                                                                                                              |
| 500 | 1,2,3,5,6,7<br>,8,13 | 4,9,10,11,<br>12,14,15,1<br>6 | 29 | iRT-<br>Kit_WR_fusion,O70594,P01836,P02631,P08937,P10247,P19629,P25809,P30904,P31044,P36860,P46844,P47967,P48508,P50115,P50116,P52590,P55091,P57113,P63081,Q62714,Q62812,Q63618,Q66H69,Q6IG05,Q6Q0N1,Q9JI85,Q9QX74,Q9WUW8                                                                                                                                                                                                                                                                                                                                                                                                                                     |
| 501 | 1,2,3,5,6,7<br>,8,14 | 4,9,10,11,<br>12,13,15,1<br>6 | 28 | O70594,P08649,P08937,P18757,P19629,P23928,P31044,P46844,P48037,P48508,P50115,P50116,P52590,P57113,P63081,P97580,Q5QE79,Q5RLM2,Q62714,Q62812,Q63317,Q63751,Q64602,Q6IG05,Q923S2,Q9QX74,Q9WUW8,Q9WUW9                                                                                                                                                                                                                                                                                                                                                                                                                                                           |
| 502 | 1,2,3,5,6,7<br>,8,15 | 4,9,10,11,<br>12,13,14,1<br>6 | 53 | iRT-<br>Kit_WR_fusion,O08557,O35763,O70377,O70594,O88339;Q4V882,P01946,P02091,P08649,P08721,P08937,P10247,P18757,P19132,P19468,P19629,P23928,P30904,P31044,P36860,P38918,P46844,P48508,P50115,P50116,P50280,P52590,P53790,P57113,Q05175,Q3ZAV1,Q498D9,Q5I0E9,Q5M7T9,Q62714,Q62812,Q63270,Q63317,Q63618,Q64602,Q6IG05,Q6MG61,Q6PCU2,Q6Q0N1,Q8CGS4,Q920G2,Q923S2,Q99MZ8,Q9QX74,Q9WTW7,Q9WUW8,Q9Z0V6,Q9Z0W7                                                                                                                                                                                                                                                      |
| 503 | 1,2,3,5,6,7<br>,8,16 | 4,9,10,11,<br>12,13,14,1<br>5 | 67 | B0LT89,iRT-<br>Kit_WR_fusion,O08557,O35763,O70377,O70594,P01836,P02783,P08649,P08937,P10247,P18757,P19468,P19629,P23928,P29975,P31044,P36970,P38918,P46720,P46844,P48037,P48508,P50115,P50116,P50280,P52590,P52847,P53790,P57113,P63081,P97580,Q03248,Q05175,Q3ZAV1,Q5I0D7,Q5I0E9,Q5M7T9,Q5RLM2,Q62714,Q62761,Q62762,Q62763,Q62812,Q63270,Q63317,Q63424,Q63618,Q64602,Q66H69,Q68FT5,Q6AY41,Q6IG05,Q6MG61,Q6Q0N1,Q71MB6,Q80W57,Q8R431,Q920G2,Q923S2,Q9JHB9,Q9JJ40,Q9JLJ3,Q9QX74,Q9QYU4,Q9WTW7,Q9WUW8,Q9WUW9,Q9Z0W7                                                                                                                                             |



|     |                       |                               |    |                                                                                                                                                                                                                                                                                                                                                        |
|-----|-----------------------|-------------------------------|----|--------------------------------------------------------------------------------------------------------------------------------------------------------------------------------------------------------------------------------------------------------------------------------------------------------------------------------------------------------|
| 504 | 1,2,3,5,6,7<br>,9,10  | 4,8,11,12,<br>13,14,15,1<br>6 | 9  | D3ZTX0,O54728,O70594,P00762,P20766,P23928,P36860,P50116,Q9JJ50                                                                                                                                                                                                                                                                                         |
| 505 | 1,2,3,5,6,7<br>,9,11  | 4,8,10,12,<br>13,14,15,1<br>6 | 3  | P08649,P50116,P52590                                                                                                                                                                                                                                                                                                                                   |
| 506 | 1,2,3,5,6,7<br>,9,12  | 4,8,10,11,<br>13,14,15,1<br>6 | 6  | O54728,P36860,P50116,P52590,Q09030,Q6AY61                                                                                                                                                                                                                                                                                                              |
| 507 | 1,2,3,5,6,7<br>,9,13  | 4,8,10,11,<br>12,14,15,1<br>6 | 5  | P01835,P36860,P52590,Q09030,Q62714                                                                                                                                                                                                                                                                                                                     |
| 508 | 1,2,3,5,6,7<br>,9,14  | 4,8,10,11,<br>12,13,15,1<br>6 | 6  | P50116,P52590,Q09030,Q5QE79,Q62714,Q63751                                                                                                                                                                                                                                                                                                              |
| 509 | 1,2,3,5,6,7<br>,9,15  | 4,8,10,11,<br>12,13,14,1<br>6 | 7  | O54728,P01946,P02091,P08721,P36860,Q62714,Q99MH3                                                                                                                                                                                                                                                                                                       |
| 510 | 1,2,3,5,6,7<br>,9,16  | 4,8,10,11,<br>12,13,14,1<br>5 | 2  | P52590,Q09030                                                                                                                                                                                                                                                                                                                                          |
| 511 | 1,2,3,5,6,7<br>,10,11 | 4,8,9,12,1<br>3,14,15,16      | 8  | O08557,P08721,P20766,P36860,P47967,P48037,P50116,P63029                                                                                                                                                                                                                                                                                                |
| 512 | 1,2,3,5,6,7<br>,10,12 | 4,8,9,11,1<br>3,14,15,16      | 13 | O54728,P19814,P36860,P38918,P46844,P47967,P48508,P50116,P57113,Q5RLM2,Q66HG3,Q6AY61,Q9QYU4                                                                                                                                                                                                                                                             |
| 513 | 1,2,3,5,6,7<br>,10,13 | 4,8,9,11,1<br>2,14,15,16      | 15 | A2RUW1,O70594,P01835,P19468,P23928,P36860,P46844,P47967,P48508,P57113,P80299,Q62714,Q63618,Q6AY61,Q9WUW8                                                                                                                                                                                                                                               |
| 514 | 1,2,3,5,6,7<br>,10,14 | 4,8,9,11,1<br>2,13,15,16      | 16 | A2RUW1,O70594,P23928,P48037,P48508,P50116,P52590,P57113,Q5I0E9,Q5RLM2,Q62714,Q64602,Q6AY61,Q71MB6,Q923S2,Q9WUW8                                                                                                                                                                                                                                        |
| 515 | 1,2,3,5,6,7<br>,10,15 | 4,8,9,11,1<br>2,13,14,16      | 44 | A2RUW1,O08557,O54728,O70377,O70594,O88339;Q4V882,P01946,P02091,P08721,P10536,P17988,P18297,P18757,P19468,P20766,P23928,P29975,P36860,P38918,P46844,P48508,P53790,P54921,P57113,Q03248,Q05175,Q5I0E9,Q5RKI1,Q62714,Q63270,Q63618,Q64602,Q6AY61,Q6MG61,Q6Q0N1,Q71MB6,Q7M0E3,Q80W57,Q8K3P7,Q923S2,Q9QYU4,Q9WTW7,Q9WUW8,Q9ZOW7                             |
| 516 | 1,2,3,5,6,7<br>,10,16 | 4,8,9,11,1<br>2,13,14,15      | 48 | O08557,O70377,O70594,P08721,P17988,P18297,P18757,P19468,P20766,P23928,P29975,P36970,P38918,P43427,P46844,P48037,P48508,P52590,P52847,P53790,P57113,P60711;P63259,Q03248,Q05175,Q3T1J9,Q3ZAV1,Q5I0D7,Q5I0E9,Q5RLM2,Q62714,Q63270,Q63424,Q63618,Q64093,Q64602,Q68FT5,Q6MG61,Q6Q0N1,Q71MB6,Q80W57,Q8R431,Q923S2,Q9JJ40,Q9QYU4,Q9WTW7,Q9WUW8,Q9WUW9,Q9ZOW7 |
| 517 | 1,2,3,5,6,7<br>,11,12 | 4,8,9,10,1<br>3,14,15,16      | 3  | P47967,P50116,Q5I0D1                                                                                                                                                                                                                                                                                                                                   |

|     |                       |                               |    |                                                                                                                                                                                |
|-----|-----------------------|-------------------------------|----|--------------------------------------------------------------------------------------------------------------------------------------------------------------------------------|
| 518 | 1,2,3,5,6,7<br>,11,13 | 4,8,9,10,1<br>2,14,15,16      | 5  | P01835,P36860,P47967,P52590,P63029                                                                                                                                             |
| 519 | 1,2,3,5,6,7<br>,11,14 | 4,8,9,10,1<br>2,13,15,16      | 5  | P08649,P50116,P52590,P63029,Q63751                                                                                                                                             |
| 520 | 1,2,3,5,6,7<br>,11,15 | 4,8,9,10,1<br>2,13,14,16      | 7  | O08557,P01946,P02091,P08649,P08721,P17988,Q6IFW6                                                                                                                               |
| 521 | 1,2,3,5,6,7<br>,11,16 | 4,8,9,10,1<br>2,13,14,15      | 9  | P01039,P02783,P07647,P08649,P08721,P17988,P52590,Q8R5M3,Q9JHB9                                                                                                                 |
| 522 | 1,2,3,5,6,7<br>,12,13 | 4,8,9,10,1<br>1,14,15,16      | 6  | P01835,P19814,P36860,P47967,P52590,Q6AY61                                                                                                                                      |
| 523 | 1,2,3,5,6,7<br>,12,14 | 4,8,9,10,1<br>1,13,15,16      | 6  | P01835,P19814,P52590,Q5RLM2,Q62714,Q6AY61                                                                                                                                      |
| 524 | 1,2,3,5,6,7<br>,12,15 | 4,8,9,10,1<br>1,13,14,16      | 8  | O54728,P01946,P02091,P08721,P19814,P36860,Q62714,Q6AY61                                                                                                                        |
| 525 | 1,2,3,5,6,7<br>,12,16 | 4,8,9,10,1<br>1,13,14,15      | 6  | P46844,P47967,P52590,Q5I0D7,Q5RLM2,Q6AY61                                                                                                                                      |
| 526 | 1,2,3,5,6,7<br>,13,14 | 4,8,9,10,1<br>1,12,15,16      | 6  | P01835,P52590,P63081,Q62714,Q6AY61,Q9WUW8                                                                                                                                      |
| 527 | 1,2,3,5,6,7<br>,13,15 | 4,8,9,10,1<br>1,12,14,16      | 10 | A2RUW1,O70594,P01835,P01946,P02091,P08721,P36860,Q62714,Q6AY61,Q9WUW8                                                                                                          |
| 528 | 1,2,3,5,6,7<br>,13,16 | 4,8,9,10,1<br>1,12,14,15      | 8  | O70594,P01835,P46844,P52590,P57113,Q5I0D7,Q62714,Q9WUW8                                                                                                                        |
| 529 | 1,2,3,5,6,7<br>,14,15 | 4,8,9,10,1<br>1,12,13,16      | 9  | P01835,P01946,P02091,P08721,P52590,Q62714,Q62812,Q6AY61,Q9WUW8                                                                                                                 |
| 530 | 1,2,3,5,6,7<br>,14,16 | 4,8,9,10,1<br>1,12,13,15      | 12 | B0LT89,P01835,P02783,P48037,P52590,P57113,Q5I0D7,Q5RLM2,Q62714,Q62812,Q71MB6,Q9WUW8                                                                                            |
| 531 | 1,2,3,5,6,7<br>,15,16 | 4,8,9,10,1<br>1,12,13,14      | 25 | B0LT89,O08557,O70594,P01835,P01946,P02091,P02783,P08721,P17988,P18297,P19468,P38918,P46844,P48508,P52590,P53790,P57113,Q5I0D7,Q5I0E9,Q62714,Q62812,Q63270,Q71MB6,Q9WTW7,Q9WUW8 |
| 532 | 1,2,3,5,6,8<br>,9,10  | 4,7,11,12,<br>13,14,15,1<br>6 | 9  | O70594,P08937,P10247,P25031,P36860,P70545,P97580,Q09030,Q99MH3                                                                                                                 |
| 533 | 1,2,3,5,6,8<br>,9,11  | 4,7,10,12,<br>13,14,15,1<br>6 | 8  | P08937,P10247,P52590,P63029,Q5I0J9,Q6IG05,Q6P6S4,Q99MH3                                                                                                                        |
| 534 | 1,2,3,5,6,8<br>,9,12  | 4,7,10,11,<br>13,14,15,1<br>6 | 5  | P10247,P36376,Q09030,Q6IG05,Q99MH3                                                                                                                                             |
| 535 | 1,2,3,5,6,8<br>,9,13  | 4,7,10,11,<br>12,14,15,1<br>6 | 4  | P08937,P10247,P52590,Q09030                                                                                                                                                    |

|     |                       |                               |    |                                                                                                                                                                                                                                                                                                            |
|-----|-----------------------|-------------------------------|----|------------------------------------------------------------------------------------------------------------------------------------------------------------------------------------------------------------------------------------------------------------------------------------------------------------|
| 536 | 1,2,3,5,6,8<br>,9,14  | 4,7,10,11,<br>12,13,15,1<br>6 | 6  | P00714,P08937,P52590,Q09030,Q5I0J9,Q63751                                                                                                                                                                                                                                                                  |
| 537 | 1,2,3,5,6,8<br>,9,15  | 4,7,10,11,<br>12,13,14,1<br>6 | 10 | P00714,P01681,P01946,P02091,P10247,P19132,P36376,Q62714,Q6IG05,Q99MH3                                                                                                                                                                                                                                      |
| 538 | 1,2,3,5,6,8<br>,9,16  | 4,7,10,11,<br>12,13,14,1<br>5 | 3  | P52590,Q09030,Q6IG05                                                                                                                                                                                                                                                                                       |
| 539 | 1,2,3,5,6,8<br>,10,11 | 4,7,9,12,1<br>3,14,15,16      | 9  | P08937,P10247,P15399,P25031,P63029,P97580,Q68G31,Q6IFU7,Q6IG05                                                                                                                                                                                                                                             |
| 540 | 1,2,3,5,6,8<br>,10,12 | 4,7,9,11,1<br>3,14,15,16      | 14 | P08937,P10247,P19814,P25031,P30904,P36860,P46844,P48508,P97580,Q498D9,Q5RLM2,Q66<br>HG3,Q6IG05,Q91ZS3                                                                                                                                                                                                      |
| 541 | 1,2,3,5,6,8<br>,10,13 | 4,7,9,11,1<br>2,14,15,16      | 14 | O70594,O88339;Q4V882,P08937,P10247,P25031,P36860,P46844,P48508,P97580,Q498D9,Q62<br>714,Q63618,Q68G31,Q9WUW8                                                                                                                                                                                               |
| 542 | 1,2,3,5,6,8<br>,10,14 | 4,7,9,11,1<br>2,13,15,16      | 15 | O70594,O88339;Q4V882,P08937,P10247,P25031,P48508,P52590,P54921,P57113,P97580,Q5RL<br>M2,Q62714,Q68G31,Q923S2,Q9WUW8                                                                                                                                                                                        |
| 543 | 1,2,3,5,6,8<br>,10,15 | 4,7,9,11,1<br>2,13,14,16      | 30 | O70377,O70594,O88339;Q4V882,P01946,P02091,P10247,P15399,P19132,P19468,P19629,P239<br>28,P25031,P30904,P36860,P38918,P46844,P48508,P53790,P54921,P97580,Q05175,Q498D9,Q5<br>I0E9,Q62714,Q63270,Q63618,Q6IG05,Q6MG61,Q6Q0N1,Q99MH3                                                                           |
| 544 | 1,2,3,5,6,8<br>,10,16 | 4,7,9,11,1<br>2,13,14,15      | 38 | O70377,O70594,O88339;Q4V882,P10247,P15399,P18757,P19468,P23928,P25031,P38918,P468<br>44,P48508,P52590,P53790,P57113,P97580,P97605,Q05175,Q30KJ2,Q3T1J9,Q3ZAV1,Q5I0E9,Q6<br>2761;Q62762;Q62763,Q63270,Q63424,Q63618,Q64602,Q6AY41,Q6IG05,Q6MG61,Q6Q0N1,Q7<br>1MB6,Q80W57,Q8R431,Q923S2,Q9WTW7,Q9WUW8,Q9Z0W7 |
| 545 | 1,2,3,5,6,8<br>,11,12 | 4,7,9,10,1<br>3,14,15,16      | 8  | P08937,P10247,P12020,P63029,Q5GRG2,Q6IFU7,Q6IG05,Q9JI85                                                                                                                                                                                                                                                    |
| 546 | 1,2,3,5,6,8<br>,11,13 | 4,7,9,10,1<br>2,14,15,16      | 9  | P08937,P10247,P52590,P63029,Q5GRG2,Q68G31,Q6IFU7,Q6IG05,Q9JI85                                                                                                                                                                                                                                             |
| 547 | 1,2,3,5,6,8<br>,11,14 | 4,7,9,10,1<br>2,13,15,16      | 8  | P08937,P52590,P63029,P97580,Q5GRG2,Q63751,Q6IFU7,Q6IG05                                                                                                                                                                                                                                                    |
| 548 | 1,2,3,5,6,8<br>,11,15 | 4,7,9,10,1<br>2,13,14,16      | 14 | P01946,P02091,P10247,P50280,P63029,Q4FZU2,Q6IFU7,Q6IFU8,Q6IFW6,Q6IG02,Q6IG05,Q6IM<br>F3,Q6P6Q2,Q6P6S4                                                                                                                                                                                                      |
| 549 | 1,2,3,5,6,8<br>,11,16 | 4,7,9,10,1<br>2,13,14,15      | 10 | P02782,P02783,P50280,P52590,P63029,Q5GRG2,Q6IFU7,Q6IG05,Q9JHB9,Q9JI85                                                                                                                                                                                                                                      |
| 550 | 1,2,3,5,6,8<br>,12,13 | 4,7,9,10,1<br>1,14,15,16      | 4  | P10247,P19814,P52590,Q6IG05                                                                                                                                                                                                                                                                                |
| 551 | 1,2,3,5,6,8<br>,12,14 | 4,7,9,10,1<br>1,13,15,16      | 5  | P00714,P08937,P52590,Q5RLM2,Q6IG05                                                                                                                                                                                                                                                                         |
| 552 | 1,2,3,5,6,8<br>,12,15 | 4,7,9,10,1<br>1,13,14,16      | 9  | P01946,P02091,P10247,P19132,P19814,P36376,Q498D9,Q6IG05,Q9R168                                                                                                                                                                                                                                             |

|     |                       |                          |    |                                                                                            |
|-----|-----------------------|--------------------------|----|--------------------------------------------------------------------------------------------|
| 553 | 1,2,3,5,6,8<br>,12,16 | 4,7,9,10,1<br>1,13,14,15 | 3  | P46844,P52590,Q6IG05                                                                       |
| 554 | 1,2,3,5,6,8<br>,13,14 | 4,7,9,10,1<br>1,12,15,16 | 6  | P08937,P52590,P97580,Q62714,Q68G31,Q9WUW8                                                  |
| 555 | 1,2,3,5,6,8<br>,13,15 | 4,7,9,10,1<br>1,12,14,16 | 10 | O70594,P01946,P02091,P10247,P19132,Q498D9,Q62714,Q68G31,Q6IG05,Q8CGS4                      |
| 556 | 1,2,3,5,6,8<br>,13,16 | 4,7,9,10,1<br>1,12,14,15 | 7  | O70594,P46844,P52590,P97580,Q62714,Q6IG05,Q9WUW8                                           |
| 557 | 1,2,3,5,6,8<br>,14,15 | 4,7,9,10,1<br>1,12,13,16 | 10 | P00714,P01946,P02091,P08937,P19132,P52590,P54921,P97580,Q62714,Q6IG05                      |
| 558 | 1,2,3,5,6,8<br>,14,16 | 4,7,9,10,1<br>1,12,13,15 | 7  | P02783,P08937,P52590,P97580,Q62714,Q6IG05,Q9WUW8                                           |
| 559 | 1,2,3,5,6,8<br>,15,16 | 4,7,9,10,1<br>1,12,13,14 | 13 | O70594,P01946,P02091,P02783,P10247,P46844,P48508,P52590,P53790,P97580,Q62714,Q63270,Q6IG05 |
| 560 | 1,2,3,5,6,9<br>,10,11 | 4,7,8,12,1<br>3,14,15,16 | 4  | P63029,Q5I0J9,Q99MH3,Q9Z2L0                                                                |
| 561 | 1,2,3,5,6,9<br>,10,12 | 4,7,8,11,1<br>3,14,15,16 | 6  | O54728,P0C0A9,P30120,Q09030,Q99041,Q99MH3                                                  |
| 562 | 1,2,3,5,6,9<br>,10,13 | 4,7,8,11,1<br>2,14,15,16 | 5  | P0C0A9,P36860,Q06000,Q09030,Q99MH3                                                         |
| 563 | 1,2,3,5,6,9<br>,10,14 | 4,7,8,11,1<br>2,13,15,16 | 6  | P00714,P30120,P52590,Q06000,Q09030,Q5I0J9                                                  |
| 564 | 1,2,3,5,6,9<br>,10,15 | 4,7,8,11,1<br>2,13,14,16 | 9  | O54728,P00714,P01946,P02091,P30120,P36860,Q811M5,Q99041,Q99MH3                             |
| 565 | 1,2,3,5,6,9<br>,10,16 | 4,7,8,11,1<br>2,13,14,15 | 1  | Q09030                                                                                     |
| 566 | 1,2,3,5,6,9<br>,11,12 | 4,7,8,10,1<br>3,14,15,16 | 3  | Q03191,Q5I0J9,Q99MH3                                                                       |
| 567 | 1,2,3,5,6,9<br>,11,13 | 4,7,8,10,1<br>2,14,15,16 | 0  |                                                                                            |
| 568 | 1,2,3,5,6,9<br>,11,14 | 4,7,8,10,1<br>2,13,15,16 | 4  | P0DMW0;P0DMW1,P52590,P63029,Q5I0J9                                                         |
| 569 | 1,2,3,5,6,9<br>,11,15 | 4,7,8,10,1<br>2,13,14,16 | 3  | P01946,P02091,Q99MH3                                                                       |
| 570 | 1,2,3,5,6,9<br>,11,16 | 4,7,8,10,1<br>2,13,14,15 | 2  | P52590,Q5I0J9                                                                              |
| 571 | 1,2,3,5,6,9<br>,12,13 | 4,7,8,10,1<br>1,14,15,16 | 3  | P0C0A9,Q09030,Q99041                                                                       |
| 572 | 1,2,3,5,6,9<br>,12,14 | 4,7,8,10,1<br>1,13,15,16 | 5  | P00714,P52590,Q09030,Q5I0J9,Q99041                                                         |

|     |                        |                          |    |                                                                              |
|-----|------------------------|--------------------------|----|------------------------------------------------------------------------------|
| 573 | 1,2,3,5,6,9<br>,12,15  | 4,7,8,10,1<br>1,13,14,16 | 9  | O54728,P00714,P01946,P02091,P0C0A9,P30120,Q6AY61,Q99041,Q99MH3               |
| 574 | 1,2,3,5,6,9<br>,12,16  | 4,7,8,10,1<br>1,13,14,15 | 3  | P52590,Q09030,Q99041                                                         |
| 575 | 1,2,3,5,6,9<br>,13,14  | 4,7,8,10,1<br>1,12,15,16 | 2  | P52590,Q09030                                                                |
| 576 | 1,2,3,5,6,9<br>,13,15  | 4,7,8,10,1<br>1,12,14,16 | 4  | P01946,P02091,P62804,Q99MH3                                                  |
| 577 | 1,2,3,5,6,9<br>,13,16  | 4,7,8,10,1<br>1,12,14,15 | 3  | P52590,Q09030,Q9EQS0                                                         |
| 578 | 1,2,3,5,6,9<br>,14,15  | 4,7,8,10,1<br>1,12,13,16 | 7  | P00714,P01946,P02091,P22273,P30120,P52590,Q99MH3                             |
| 579 | 1,2,3,5,6,9<br>,14,16  | 4,7,8,10,1<br>1,12,13,15 | 3  | P52590,Q09030,Q5I0J9                                                         |
| 580 | 1,2,3,5,6,9<br>,15,16  | 4,7,8,10,1<br>1,12,13,14 | 2  | P01946,P02091                                                                |
| 581 | 1,2,3,5,6,1<br>0,11,12 | 4,7,8,9,13,<br>14,15,16  | 0  |                                                                              |
| 582 | 1,2,3,5,6,1<br>0,11,13 | 4,7,8,9,12,<br>14,15,16  | 2  | P63029,Q68G31                                                                |
| 583 | 1,2,3,5,6,1<br>0,11,14 | 4,7,8,9,12,<br>13,15,16  | 2  | P52590,P63029                                                                |
| 584 | 1,2,3,5,6,1<br>0,11,15 | 4,7,8,9,12,<br>13,14,16  | 3  | P01946,P02091,Q99MH3                                                         |
| 585 | 1,2,3,5,6,1<br>0,11,16 | 4,7,8,9,12,<br>13,14,15  | 0  |                                                                              |
| 586 | 1,2,3,5,6,1<br>0,12,13 | 4,7,8,9,11,<br>14,15,16  | 3  | P36860,Q6AY61,Q812E4                                                         |
| 587 | 1,2,3,5,6,1<br>0,12,14 | 4,7,8,9,11,<br>13,15,16  | 4  | P00714,P52590,Q5RLM2,Q6AY61                                                  |
| 588 | 1,2,3,5,6,1<br>0,12,15 | 4,7,8,9,11,<br>13,14,16  | 11 | O54728,P01946,P02091,P19814,P30120,P36860,Q498D9,Q6AY61,Q812E4,Q99041,Q99MH3 |
| 589 | 1,2,3,5,6,1<br>0,12,16 | 4,7,8,9,11,<br>13,14,15  | 0  |                                                                              |
| 590 | 1,2,3,5,6,1<br>0,13,14 | 4,7,8,9,11,<br>12,15,16  | 4  | P52590,Q06000,Q62714,Q9WUW8                                                  |
| 591 | 1,2,3,5,6,1<br>0,13,15 | 4,7,8,9,11,<br>12,14,16  | 7  | P01946,P02091,P21674,P36860,Q498D9,Q62714,Q812E4                             |
| 592 | 1,2,3,5,6,1<br>0,13,16 | 4,7,8,9,11,<br>12,14,15  | 2  | P52590,Q9WUW8                                                                |

|     |                        |                         |   |                                                                |
|-----|------------------------|-------------------------|---|----------------------------------------------------------------|
| 593 | 1,2,3,5,6,1<br>0,14,15 | 4,7,8,9,11,<br>12,13,16 | 8 | P00714,P01946,P02091,P30120,P52590,P54921,P63322,Q62714        |
| 594 | 1,2,3,5,6,1<br>0,14,16 | 4,7,8,9,11,<br>12,13,15 | 4 | P14668,P52590,Q71MB6,Q9WUW8                                    |
| 595 | 1,2,3,5,6,1<br>0,15,16 | 4,7,8,9,11,<br>12,13,14 | 9 | O70594,P01946,P02091,P17988,P19468,P48508,P53790,P82471,Q71MB6 |
| 596 | 1,2,3,5,6,1<br>1,12,13 | 4,7,8,9,10,<br>14,15,16 | 1 | P47967                                                         |
| 597 | 1,2,3,5,6,1<br>1,12,14 | 4,7,8,9,10,<br>13,15,16 | 3 | P52590,P63029,Q5I0J9                                           |
| 598 | 1,2,3,5,6,1<br>1,12,15 | 4,7,8,9,10,<br>13,14,16 | 3 | P01946,P02091,Q99MH3                                           |
| 599 | 1,2,3,5,6,1<br>1,12,16 | 4,7,8,9,10,<br>13,14,15 | 0 |                                                                |
| 600 | 1,2,3,5,6,1<br>1,13,14 | 4,7,8,9,10,<br>12,15,16 | 2 | P52590,P63029                                                  |
| 601 | 1,2,3,5,6,1<br>1,13,15 | 4,7,8,9,10,<br>12,14,16 | 3 | P01946,P02091,P21674                                           |
| 602 | 1,2,3,5,6,1<br>1,13,16 | 4,7,8,9,10,<br>12,14,15 | 1 | P52590                                                         |
| 603 | 1,2,3,5,6,1<br>1,14,15 | 4,7,8,9,10,<br>12,13,16 | 3 | P01946,P02091,P52590                                           |
| 604 | 1,2,3,5,6,1<br>1,14,16 | 4,7,8,9,10,<br>12,13,15 | 3 | P02783,P52590,Q4KLZ6                                           |
| 605 | 1,2,3,5,6,1<br>1,15,16 | 4,7,8,9,10,<br>12,13,14 | 4 | P01946,P02091,P02783,P17988                                    |
| 606 | 1,2,3,5,6,1<br>2,13,14 | 4,7,8,9,10,<br>11,15,16 | 4 | P01835,P49134,P52590,Q6AY61                                    |
| 607 | 1,2,3,5,6,1<br>2,13,15 | 4,7,8,9,10,<br>11,14,16 | 5 | P01946,P02091,P19814,Q6AY61,Q812E4                             |
| 608 | 1,2,3,5,6,1<br>2,13,16 | 4,7,8,9,10,<br>11,14,15 | 1 | P52590                                                         |
| 609 | 1,2,3,5,6,1<br>2,14,15 | 4,7,8,9,10,<br>11,13,16 | 5 | P00714,P01946,P02091,P52590,Q6AY61                             |
| 610 | 1,2,3,5,6,1<br>2,14,16 | 4,7,8,9,10,<br>11,13,15 | 1 | P52590                                                         |
| 611 | 1,2,3,5,6,1<br>2,15,16 | 4,7,8,9,10,<br>11,13,14 | 3 | P01946,P02091,Q6AY61                                           |
| 612 | 1,2,3,5,6,1<br>3,14,15 | 4,7,8,9,10,<br>11,12,16 | 6 | P01835,P01946,P02091,P21674,P52590,Q62714                      |

|     |                        |                               |                                                                                         |                                                                                                                            |
|-----|------------------------|-------------------------------|-----------------------------------------------------------------------------------------|----------------------------------------------------------------------------------------------------------------------------|
| 613 | 1,2,3,5,6,1<br>3,14,16 | 4,7,8,9,10,<br>11,12,15       | 4                                                                                       | P01835,P52590,Q62714,Q9WUW8                                                                                                |
| 614 | 1,2,3,5,6,1<br>3,15,16 | 4,7,8,9,10,<br>11,12,14       | 5                                                                                       | P01835,P01946,P02091,P52590,Q62714                                                                                         |
| 615 | 1,2,3,5,6,1<br>4,15,16 | 4,7,8,9,10,<br>11,12,13       | 5                                                                                       | P01946,P02091,P02783,P52590,Q62714                                                                                         |
| 616 | 1,2,3,5,7,8<br>,9,10   | 4,6,11,12,<br>13,14,15,1<br>6 | 6                                                                                       | O35763,O70594,P20766,P70545,Q4FZU6,Q63618                                                                                  |
| 617 | 1,2,3,5,7,8<br>,9,11   | 4,6,10,12,<br>13,14,15,1<br>6 | 6                                                                                       | iRT-Kit_WR_fusion,P06760,P08649,P35280,Q6IG05,Q6IMF3                                                                       |
| 618 | 1,2,3,5,7,8<br>,9,12   | 4,6,10,11,<br>13,14,15,1<br>6 | 2                                                                                       | iRT-Kit_WR_fusion,Q6IG05                                                                                                   |
| 619 | 1,2,3,5,7,8<br>,9,13   | 4,6,10,11,<br>12,14,15,1<br>6 | 3                                                                                       | iRT-Kit_WR_fusion,P08649,Q66H69                                                                                            |
| 620 | 1,2,3,5,7,8<br>,9,14   | 4,6,10,11,<br>12,13,15,1<br>6 | 5                                                                                       | P00714,P06760,P08649,P08937,Q63751                                                                                         |
| 621 | 1,2,3,5,7,8<br>,9,15   | 4,6,10,11,<br>12,13,14,1<br>6 | iRT-<br>11                                                                              | Kit_WR_fusion,P00714,P01681,P08649,P19132,P35280,P36376,Q4FZU6,Q62714,Q6IG05,Q9Z0V<br>6                                    |
| 622 | 1,2,3,5,7,8<br>,9,16   | 4,6,10,11,<br>12,13,14,1<br>5 | 2                                                                                       | iRT-Kit_WR_fusion,P08649                                                                                                   |
| 623 | 1,2,3,5,7,8<br>,10,11  | 4,6,9,12,1<br>3,14,15,16      | 7                                                                                       | P08937,P20766,P47967,Q66H69,Q6IFU7,Q6IG05,Q6IMF3                                                                           |
| 624 | 1,2,3,5,7,8<br>,10,12  | 4,6,9,11,1<br>3,14,15,16      | iRT-<br>16                                                                              | Kit_WR_fusion,P19814,P20766,P30904,P46844,P47967,P48508,Q05175,Q5RLM2,Q63618,Q6409<br>3,Q66H69,Q6IG05,Q6MG61,Q6Q0N1,Q9WUW8 |
| 625 | 1,2,3,5,7,8<br>,10,13  | 4,6,9,11,1<br>2,14,15,16      | O70377,O70594,P19468,P25809,P30904,P36860,P46844,P47967,P48508,P57113,Q05175,Q3ZA<br>24 | V1,Q62714,Q63355,Q63424,Q63618,Q64093,Q66H69,Q6AY41,Q6MG61,Q6Q0N1,Q80W57,Q9<br>WUW8,Q9WUW9                                 |
| 626 | 1,2,3,5,7,8<br>,10,14  | 4,6,9,11,1<br>2,13,15,16      | O70377,O70594,P08937,P46844,P48508,P57113,Q05175,Q5RLM2,Q62714,Q63355,Q63751,Q6<br>16   | 4602,Q66H69,Q923S2,Q9WUW8,Q9WUW9                                                                                           |

|     |                       |                          |    |                                                                                                                                                                                                                                                                                                                                  |
|-----|-----------------------|--------------------------|----|----------------------------------------------------------------------------------------------------------------------------------------------------------------------------------------------------------------------------------------------------------------------------------------------------------------------------------|
| 627 | 1,2,3,5,7,8<br>,10,15 | 4,6,9,11,1<br>2,13,14,16 | 45 | O35763,O70377,O70594,O88339,Q4V882,P10536,P12368,P18757,P19132,P19468,P20766,P23928,P30904,P38918,P46844,P48508,P51907,P53790,P54921,P57113,Q05175,Q3ZAV1,Q5I0E9,Q5RK1,Q5RLM2,Q62714,Q62753,Q63270,Q63355,Q63424,Q63618,Q64093,Q64602,Q66H69,Q6AY41,Q6IG05,Q6MG61,Q6Q0N1,Q80W57,Q8R431,Q923S2,Q9JJ19,Q9WTW7,Q9WUW8,Q9Z0V6,Q9Z0W7 |
| 628 | 1,2,3,5,7,8<br>,10,16 | 4,6,9,11,1<br>2,13,14,15 | 42 | O35077,O35763,O70377,O70594,P18757,P19468,P20766,P23928,P29975,P38918,P46720,P46844,P48508,P53790,P57113,Q03248,Q05175,Q3ZAV1,Q5I0E9,Q5M7T9,Q5RLM2,Q62687,Q63270,Q63355,Q63424,Q63618,Q64093,Q64602,Q66H69,Q6AY41,Q6MG61,Q6Q0N1,Q71MB6,Q80W57,Q8R431,Q923S2,Q9JJ19,Q9JJ40,Q9WTW7,Q9WUW8,Q9WUW9,Q9Z0W7                            |
| 629 | 1,2,3,5,7,8<br>,11,12 | 4,6,9,10,1<br>3,14,15,16 |    | 9 iRT-Kit_WR_fusion,P08649,P47967,P70709,Q5I0D1,Q66H69,Q6IG05,Q6IMF3,Q811M5                                                                                                                                                                                                                                                      |
| 630 | 1,2,3,5,7,8<br>,11,13 | 4,6,9,10,1<br>2,14,15,16 |    | 7 P08649,P47967,Q66H69,Q6IFU7,Q6IG05,Q6IMF3,Q811M5                                                                                                                                                                                                                                                                               |
| 631 | 1,2,3,5,7,8<br>,11,14 | 4,6,9,10,1<br>2,13,15,16 | 10 | P06760,P08649,P08937,Q63751,Q66H69,Q6IFU7,Q6IFU8,Q6IG05,Q6IMF3,Q811M5                                                                                                                                                                                                                                                            |
| 632 | 1,2,3,5,7,8<br>,11,15 | 4,6,9,10,1<br>2,13,14,16 | 12 | iRT-Kit_WR_fusion,P08649,P19132,Q4FZU2,Q66H69,Q6IFU7,Q6IFU8,Q6IFW6,Q6IG02,Q6IG05,Q6IMF3,Q6P6Q2                                                                                                                                                                                                                                   |
| 633 | 1,2,3,5,7,8<br>,11,16 | 4,6,9,10,1<br>2,13,14,15 | 17 | iRT-Kit_WR_fusion,P02781,P02782,P08010,P08649,P08723,P09456,P30120,P47967,Q00715,Q4FZU2,Q66H69,Q6IFU7,Q6IFU8,Q6IG05,Q6IMF3,Q9JHB9                                                                                                                                                                                                |
| 634 | 1,2,3,5,7,8<br>,12,13 | 4,6,9,10,1<br>1,14,15,16 | 7  | iRT-Kit_WR_fusion,P19814,P47967,Q66H69,Q6IG05,Q811M5,Q9WUW8                                                                                                                                                                                                                                                                      |
| 635 | 1,2,3,5,7,8<br>,12,14 | 4,6,9,10,1<br>1,13,15,16 | 9  | iRT-Kit_WR_fusion,P00714,P08937,Q5RLM2,Q63751,Q66H69,Q6IG05,Q811M5,Q9WUW8                                                                                                                                                                                                                                                        |
| 636 | 1,2,3,5,7,8<br>,12,15 | 4,6,9,10,1<br>1,13,14,16 | 6  | iRT-Kit_WR_fusion,P19132,P19814,P34901,Q66H69,Q6IG05                                                                                                                                                                                                                                                                             |
| 637 | 1,2,3,5,7,8<br>,12,16 | 4,6,9,10,1<br>1,13,14,15 | 7  | iRT-Kit_WR_fusion,P46844,P47967,Q5RLM2,Q66H69,Q6IG05,Q9WUW8                                                                                                                                                                                                                                                                      |
| 638 | 1,2,3,5,7,8<br>,13,14 | 4,6,9,10,1<br>1,12,15,16 | 7  | P08649,P08937,P25809,Q62714,Q66H69,Q811M5,Q9WUW8                                                                                                                                                                                                                                                                                 |
| 639 | 1,2,3,5,7,8<br>,13,15 | 4,6,9,10,1<br>1,12,14,16 | 8  | O70594,P08649,P19132,Q62714,Q66H69,Q6IG05,Q6Q0N1,Q9WUW8                                                                                                                                                                                                                                                                          |
| 640 | 1,2,3,5,7,8<br>,13,16 | 4,6,9,10,1<br>1,12,14,15 | 8  | O70594,P08649,P46844,P47967,Q62714,Q64093,Q66H69,Q9WUW8                                                                                                                                                                                                                                                                          |
| 641 | 1,2,3,5,7,8<br>,14,15 | 4,6,9,10,1<br>1,12,13,16 | 7  | P00714,P08649,P19132,Q5RLM2,Q62714,Q6IG05,Q9WUW8                                                                                                                                                                                                                                                                                 |
| 642 | 1,2,3,5,7,8<br>,14,16 | 4,6,9,10,1<br>1,12,13,15 | 6  | P08649,P46844,Q5RLM2,Q62714,Q62812,Q9WUW8                                                                                                                                                                                                                                                                                        |



643 1,2,3,5,7,8 4,6,9,10,1  
 ,15,16 1,12,13,14  
 644 1,2,3,5,7,9 4,6,8,12,1  
 ,10,11 3,14,15,16  
 645 1,2,3,5,7,9 4,6,8,11,1  
 ,10,12 3,14,15,16  
 646 1,2,3,5,7,9 4,6,8,11,1  
 ,10,13 2,14,15,16  
 647 1,2,3,5,7,9 4,6,8,11,1  
 ,10,14 2,13,15,16  
 648 1,2,3,5,7,9 4,6,8,11,1  
 ,10,15 2,13,14,16  
 649 1,2,3,5,7,9 4,6,8,11,1  
 ,10,16 2,13,14,15  
 650 1,2,3,5,7,9 4,6,8,10,1  
 ,11,12 3,14,15,16  
 651 1,2,3,5,7,9 4,6,8,10,1  
 ,11,13 2,14,15,16  
 652 1,2,3,5,7,9 4,6,8,10,1  
 ,11,14 2,13,15,16  
 653 1,2,3,5,7,9 4,6,8,10,1  
 ,11,15 2,13,14,16  
 654 1,2,3,5,7,9 4,6,8,10,1  
 ,11,16 2,13,14,15  
 655 1,2,3,5,7,9 4,6,8,10,1  
 ,12,13 1,14,15,16  
 656 1,2,3,5,7,9 4,6,8,10,1  
 ,12,14 1,13,15,16  
 657 1,2,3,5,7,9 4,6,8,10,1  
 ,12,15 1,13,14,16  
 658 1,2,3,5,7,9 4,6,8,10,1  
 ,12,16 1,13,14,15  
 659 1,2,3,5,7,9 4,6,8,10,1  
 ,13,14 1,12,15,16  
 660 1,2,3,5,7,9 4,6,8,10,1  
 ,13,15 1,12,14,16  
 661 1,2,3,5,7,9 4,6,8,10,1  
 ,13,16 1,12,14,15  
 662 1,2,3,5,7,9 4,6,8,10,1  
 ,14,15 1,12,13,16

iRT-  
 19 Kit\_WR\_fusion,O70594,P08649,P19132,P19468,P46844,P48508,P53790,Q05175,Q5I0E9,Q62714  
 ,Q63270,Q64093,Q6IG05,Q6Q0N1,Q8R431,Q9WTW7,Q9WUW8,Q9Z0W7  
 1 P20766  
 4 O54728,Q03191,Q6AY61,Q99041  
 1 Q6AY61  
 2 P00714,Q6AY61  
 6 O54728,P00714,P30120,Q5RKI1,Q6AY61,Q99041  
 1 P20766  
 3 P47967,Q03191,Q6AY61  
 1 P47967  
 2 P08649,P0DMW0,P0DMW1  
 2 P08649,P35280  
 1 P08649  
 4 P47967,Q03191,Q6AY61,Q99041  
 3 P00714,Q6AY61,Q99041  
 4 O54728,P00714,Q6AY61,Q99041  
 3 Q03191,Q6AY61,Q99041  
 2 P0DMW0,P0DMW1,Q6AY61  
 1 Q6AY61  
 0  
 2 P00714,Q6AY61

|     |                        |                          |    |                                                                                                                                                    |
|-----|------------------------|--------------------------|----|----------------------------------------------------------------------------------------------------------------------------------------------------|
| 663 | 1,2,3,5,7,9<br>,14,16  | 4,6,8,10,1<br>1,12,13,15 | 1  | P08649                                                                                                                                             |
| 664 | 1,2,3,5,7,9<br>,15,16  | 4,6,8,10,1<br>1,12,13,14 | 0  |                                                                                                                                                    |
| 665 | 1,2,3,5,7,1<br>0,11,12 | 4,6,8,9,13,<br>14,15,16  | 5  | P23593,P47967,P97840,Q5I0D1,Q6AY61                                                                                                                 |
| 666 | 1,2,3,5,7,1<br>0,11,13 | 4,6,8,9,12,<br>14,15,16  | 1  | P47967                                                                                                                                             |
| 667 | 1,2,3,5,7,1<br>0,11,14 | 4,6,8,9,12,<br>13,15,16  | 0  |                                                                                                                                                    |
| 668 | 1,2,3,5,7,1<br>0,11,15 | 4,6,8,9,12,<br>13,14,16  | 2  | Q5RKI1,Q6IFW6                                                                                                                                      |
| 669 | 1,2,3,5,7,1<br>0,11,16 | 4,6,8,9,12,<br>13,14,15  | 2  | P20766,P47967                                                                                                                                      |
| 670 | 1,2,3,5,7,1<br>0,12,13 | 4,6,8,9,11,<br>14,15,16  | 3  | P47967,P97840,Q6AY61                                                                                                                               |
| 671 | 1,2,3,5,7,1<br>0,12,14 | 4,6,8,9,11,<br>13,15,16  | 3  | P00714,Q5RLM2,Q6AY61                                                                                                                               |
| 672 | 1,2,3,5,7,1<br>0,12,15 | 4,6,8,9,11,<br>13,14,16  | 7  | O54728,P19814,P34901,Q5RKI1,Q6AY61,Q6RUV5,Q99041                                                                                                   |
| 673 | 1,2,3,5,7,1<br>0,12,16 | 4,6,8,9,11,<br>13,14,15  | 5  | P18297,P47967,Q5RLM2,Q6AY61,Q71MB6                                                                                                                 |
| 674 | 1,2,3,5,7,1<br>0,13,14 | 4,6,8,9,11,<br>12,15,16  | 3  | Q62714,Q6AY61,Q9WUW8                                                                                                                               |
| 675 | 1,2,3,5,7,1<br>0,13,15 | 4,6,8,9,11,<br>12,14,16  | 8  | O70594,P63095,Q5RKI1,Q62714,Q63618,Q64093,Q6AY61,Q9WUW8                                                                                            |
| 676 | 1,2,3,5,7,1<br>0,13,16 | 4,6,8,9,11,<br>12,14,15  | 10 | O70594,P18297,P19468,P46844,P47967,P63095,Q63424,Q64093,Q6AY61,Q9WUW8                                                                              |
| 677 | 1,2,3,5,7,1<br>0,14,15 | 4,6,8,9,11,<br>12,13,16  | 7  | P00714,P54921,P63095,Q5RKI1,Q62714,Q6AY61,Q9WUW8                                                                                                   |
| 678 | 1,2,3,5,7,1<br>0,14,16 | 4,6,8,9,11,<br>12,13,15  | 7  | P18297,P57113,P63095,Q5RLM2,Q6AY61,Q71MB6,Q9WUW8                                                                                                   |
| 679 | 1,2,3,5,7,1<br>0,15,16 | 4,6,8,9,11,<br>12,13,14  | 21 | O70594,P17988,P18297,P19468,P20766,P46844,P48508,P53790,P63095,Q05175,Q5I0E9,Q5RKI1,Q63355,Q63424,Q64093,Q6AY61,Q71MB6,Q80W57,Q8R431,Q9WTW7,Q9Z0W7 |
| 680 | 1,2,3,5,7,1<br>1,12,13 | 4,6,8,9,10,<br>14,15,16  | 5  | P47967,P97840,Q5I0D1,Q6AY61,Q811M5                                                                                                                 |
| 681 | 1,2,3,5,7,1<br>1,12,14 | 4,6,8,9,10,<br>13,15,16  | 3  | P47967,Q6AY61,Q811M5                                                                                                                               |
| 682 | 1,2,3,5,7,1<br>1,12,15 | 4,6,8,9,10,<br>13,14,16  | 3  | P47967,Q6AY61,Q6IFW6                                                                                                                               |

|     |                        |                          |   |                                           |
|-----|------------------------|--------------------------|---|-------------------------------------------|
| 683 | 1,2,3,5,7,1<br>1,12,16 | 4,6,8,9,10,<br>13,14,15  | 3 | P47967,P97840,Q6AY61                      |
| 684 | 1,2,3,5,7,1<br>1,13,14 | 4,6,8,9,10,<br>12,15,16  | 2 | P08649,Q811M5                             |
| 685 | 1,2,3,5,7,1<br>1,13,15 | 4,6,8,9,10,<br>12,14,16  | 3 | P08649,P47967,Q6IFW6                      |
| 686 | 1,2,3,5,7,1<br>1,13,16 | 4,6,8,9,10,<br>12,14,15  | 2 | P08649,P47967                             |
| 687 | 1,2,3,5,7,1<br>1,14,15 | 4,6,8,9,10,<br>12,13,16  | 2 | P08649,Q6IFW6                             |
| 688 | 1,2,3,5,7,1<br>1,14,16 | 4,6,8,9,10,<br>12,13,15  | 1 | P08649                                    |
| 689 | 1,2,3,5,7,1<br>1,15,16 | 4,6,8,9,10,<br>12,13,14  | 4 | P08649,P17988,Q4FZU2,Q6IFW6               |
| 690 | 1,2,3,5,7,1<br>2,13,14 | 4,6,8,9,10,<br>11,15,16  | 4 | P01835,P47967,Q6AY61,Q811M5               |
| 691 | 1,2,3,5,7,1<br>2,13,15 | 4,6,8,9,10,<br>11,14,16  | 3 | P19814,P47967,Q6AY61                      |
| 692 | 1,2,3,5,7,1<br>2,13,16 | 4,6,8,9,10,<br>11,14,15  | 3 | P47967,P97840,Q6AY61                      |
| 693 | 1,2,3,5,7,1<br>2,14,15 | 4,6,8,9,10,<br>11,13,16  | 2 | P00714,Q6AY61                             |
| 694 | 1,2,3,5,7,1<br>2,14,16 | 4,6,8,9,10,<br>11,13,15  | 2 | Q5RLM2,Q6AY61                             |
| 695 | 1,2,3,5,7,1<br>2,15,16 | 4,6,8,9,10,<br>11,13,14  | 1 | Q6AY61                                    |
| 696 | 1,2,3,5,7,1<br>3,14,15 | 4,6,8,9,10,<br>11,12,16  | 4 | P01835,Q62714,Q6AY61,Q9WUW8               |
| 697 | 1,2,3,5,7,1<br>3,14,16 | 4,6,8,9,10,<br>11,12,15  | 4 | P01835,Q62714,Q6AY61,Q9WUW8               |
| 698 | 1,2,3,5,7,1<br>3,15,16 | 4,6,8,9,10,<br>11,12,14  | 4 | P01835,Q62714,Q6AY61,Q9WUW8               |
| 699 | 1,2,3,5,7,1<br>4,15,16 | 4,6,8,9,10,<br>11,12,13  | 4 | P08649,Q62714,Q6AY61,Q9WUW8               |
| 700 | 1,2,3,5,8,9<br>,10,11  | 4,6,7,12,1<br>3,14,15,16 | 2 | Q99MH3,Q9Z2L0                             |
| 701 | 1,2,3,5,8,9<br>,10,12  | 4,6,7,11,1<br>3,14,15,16 | 6 | P00714,P11598,P34901,P36376,Q99041,Q99MH3 |
| 702 | 1,2,3,5,8,9<br>,10,13  | 4,6,7,11,1<br>2,14,15,16 | 0 |                                           |

|     |                        |                          |    |                                                                              |
|-----|------------------------|--------------------------|----|------------------------------------------------------------------------------|
| 703 | 1,2,3,5,8,9<br>,10,14  | 4,6,7,11,1<br>2,13,15,16 | 2  | P00714,P11598                                                                |
| 704 | 1,2,3,5,8,9<br>,10,15  | 4,6,7,11,1<br>2,13,14,16 | 8  | P00714,P01681,P11598,P19132,P34901,P36376,Q99041,Q99MH3                      |
| 705 | 1,2,3,5,8,9<br>,10,16  | 4,6,7,11,1<br>2,13,14,15 | 0  |                                                                              |
| 706 | 1,2,3,5,8,9<br>,11,12  | 4,6,7,10,1<br>3,14,15,16 | 5  | O88797,P36376,Q03191,Q6IG05,Q99MH3                                           |
| 707 | 1,2,3,5,8,9<br>,11,13  | 4,6,7,10,1<br>2,14,15,16 | 1  | Q6IG05                                                                       |
| 708 | 1,2,3,5,8,9<br>,11,14  | 4,6,7,10,1<br>2,13,15,16 | 1  | Q6IG05                                                                       |
| 709 | 1,2,3,5,8,9<br>,11,15  | 4,6,7,10,1<br>2,13,14,16 | 11 | P01681,P36376,Q4FZU2,Q6IFU7,Q6IFU8,Q6IFW6,Q6IG05,Q6IMF3,Q6P6Q2,Q6P6S4,Q99MH3 |
| 710 | 1,2,3,5,8,9<br>,11,16  | 4,6,7,10,1<br>2,13,14,15 | 2  | O88797,Q6IG05                                                                |
| 711 | 1,2,3,5,8,9<br>,12,13  | 4,6,7,10,1<br>1,14,15,16 | 1  | Q99041                                                                       |
| 712 | 1,2,3,5,8,9<br>,12,14  | 4,6,7,10,1<br>1,13,15,16 | 4  | P00714,P11598,P36376,Q99041                                                  |
| 713 | 1,2,3,5,8,9<br>,12,15  | 4,6,7,10,1<br>1,13,14,16 | 9  | P00714,P01681,P11598,P19132,P34901,P36376,Q6IG05,Q99041,Q99MH3               |
| 714 | 1,2,3,5,8,9<br>,12,16  | 4,6,7,10,1<br>1,13,14,15 | 2  | Q6IG05,Q99041                                                                |
| 715 | 1,2,3,5,8,9<br>,13,14  | 4,6,7,10,1<br>1,12,15,16 | 1  | P00714                                                                       |
| 716 | 1,2,3,5,8,9<br>,13,15  | 4,6,7,10,1<br>1,12,14,16 | 6  | P00714,P11598,P19132,P36376,Q6IG05,Q99041                                    |
| 717 | 1,2,3,5,8,9<br>,13,16  | 4,6,7,10,1<br>1,12,14,15 | 0  |                                                                              |
| 718 | 1,2,3,5,8,9<br>,14,15  | 4,6,7,10,1<br>1,12,13,16 | 6  | P00714,P01681,P11598,P19132,P36376,Q6IG05                                    |
| 719 | 1,2,3,5,8,9<br>,14,16  | 4,6,7,10,1<br>1,12,13,15 | 1  | P00714                                                                       |
| 720 | 1,2,3,5,8,9<br>,15,16  | 4,6,7,10,1<br>1,12,13,14 | 5  | P01681,P19132,P36376,Q6IG05,Q99041                                           |
| 721 | 1,2,3,5,8,1<br>0,11,12 | 4,6,7,9,13,<br>14,15,16  | 3  | P47967,Q6IFU7,Q6IG05                                                         |
| 722 | 1,2,3,5,8,1<br>0,11,13 | 4,6,7,9,12,<br>14,15,16  | 2  | Q6IFU7,Q6IG05                                                                |

|     |                        |                         |    |                                                                       |
|-----|------------------------|-------------------------|----|-----------------------------------------------------------------------|
| 723 | 1,2,3,5,8,1<br>0,11,14 | 4,6,7,9,12,<br>13,15,16 | 2  | Q6IFU7,Q6IG05                                                         |
| 724 | 1,2,3,5,8,1<br>0,11,15 | 4,6,7,9,12,<br>13,14,16 | 8  | Q4FZU2,Q6IFU7,Q6IFU8,Q6IFW6,Q6IG02,Q6IG05,Q6IMF3,Q6P6Q2               |
| 725 | 1,2,3,5,8,1<br>0,11,16 | 4,6,7,9,12,<br>13,14,15 | 2  | Q6IFU7,Q6IG05                                                         |
| 726 | 1,2,3,5,8,1<br>0,12,13 | 4,6,7,9,11,<br>14,15,16 | 1  | P47967                                                                |
| 727 | 1,2,3,5,8,1<br>0,12,14 | 4,6,7,9,11,<br>13,15,16 | 4  | P00714,Q5RLM2,Q63617,Q6IG05                                           |
| 728 | 1,2,3,5,8,1<br>0,12,15 | 4,6,7,9,11,<br>13,14,16 | 9  | P00714,P19132,P34901,P36376,Q498D9,Q63617,Q6IG05,Q99041,Q9R168        |
| 729 | 1,2,3,5,8,1<br>0,12,16 | 4,6,7,9,11,<br>13,14,15 | 2  | P0DMW0;P0DMW1,Q6IG05                                                  |
| 730 | 1,2,3,5,8,1<br>0,13,14 | 4,6,7,9,11,<br>12,15,16 | 1  | Q9WUW8                                                                |
| 731 | 1,2,3,5,8,1<br>0,13,15 | 4,6,7,9,11,<br>12,14,16 | 6  | P19132,Q498D9,Q62714,Q63618,Q6IG05,Q99376                             |
| 732 | 1,2,3,5,8,1<br>0,13,16 | 4,6,7,9,11,<br>12,14,15 | 2  | P46844,Q9WUW8                                                         |
| 733 | 1,2,3,5,8,1<br>0,14,15 | 4,6,7,9,11,<br>12,13,16 | 7  | P00714,P19132,P54921,P63322,Q62714,Q63617,Q6IG05                      |
| 734 | 1,2,3,5,8,1<br>0,14,16 | 4,6,7,9,11,<br>12,13,15 | 3  | P97580,Q5RLM2,Q9WUW8                                                  |
| 735 | 1,2,3,5,8,1<br>0,15,16 | 4,6,7,9,11,<br>12,13,14 | 10 | O70377,O70594,P19468,P48508,P53790,Q05175,Q64093,Q6IG05,Q8R431,Q9WTW7 |
| 736 | 1,2,3,5,8,1<br>1,12,13 | 4,6,7,9,10,<br>14,15,16 | 5  | P47967,Q5I0D1,Q6IFU7,Q6IG05,Q811M5                                    |
| 737 | 1,2,3,5,8,1<br>1,12,14 | 4,6,7,9,10,<br>13,15,16 | 4  | P11883,Q6IFU7,Q6IG05,Q811M5                                           |
| 738 | 1,2,3,5,8,1<br>1,12,15 | 4,6,7,9,10,<br>13,14,16 | 9  | P36376,Q4FZU2,Q6IFU7,Q6IFU8,Q6IFW6,Q6IG02,Q6IG05,Q6IMF3,Q6P6Q2        |
| 739 | 1,2,3,5,8,1<br>1,12,16 | 4,6,7,9,10,<br>13,14,15 | 3  | O88797,Q6IFU7,Q6IG05                                                  |
| 740 | 1,2,3,5,8,1<br>1,13,14 | 4,6,7,9,10,<br>12,15,16 | 3  | Q6IFU7,Q6IG05,Q811M5                                                  |
| 741 | 1,2,3,5,8,1<br>1,13,15 | 4,6,7,9,10,<br>12,14,16 | 8  | Q4FZU2,Q6IFU7,Q6IFU8,Q6IFW6,Q6IG02,Q6IG05,Q6IMF3,Q6P6Q2               |
| 742 | 1,2,3,5,8,1<br>1,13,16 | 4,6,7,9,10,<br>12,14,15 | 3  | P30120,Q6IFU7,Q6IG05                                                  |

|     |                        |                         |    |                                                                                                                                                    |
|-----|------------------------|-------------------------|----|----------------------------------------------------------------------------------------------------------------------------------------------------|
| 743 | 1,2,3,5,8,1<br>1,14,15 | 4,6,7,9,10,<br>12,13,16 | 9  | P00714,Q4FZU2,Q6IFU7,Q6IFU8,Q6IFW6,Q6IG02,Q6IG05,Q6IMF3,Q6P6Q2                                                                                     |
| 744 | 1,2,3,5,8,1<br>1,14,16 | 4,6,7,9,10,<br>12,13,15 | 2  | Q6IFU7,Q6IG05                                                                                                                                      |
| 745 | 1,2,3,5,8,1<br>1,15,16 | 4,6,7,9,10,<br>12,13,14 | 8  | Q4FZU2,Q6IFU7,Q6IFU8,Q6IFW6,Q6IG02,Q6IG05,Q6IMF3,Q6P6Q2                                                                                            |
| 746 | 1,2,3,5,8,1<br>2,13,14 | 4,6,7,9,10,<br>11,15,16 | 3  | P00714,Q6IG05,Q811M5                                                                                                                               |
| 747 | 1,2,3,5,8,1<br>2,13,15 | 4,6,7,9,10,<br>11,14,16 | 3  | P19132,P36376,Q6IG05                                                                                                                               |
| 748 | 1,2,3,5,8,1<br>2,13,16 | 4,6,7,9,10,<br>11,14,15 | 1  | Q6IG05                                                                                                                                             |
| 749 | 1,2,3,5,8,1<br>2,14,15 | 4,6,7,9,10,<br>11,13,16 | 5  | P00714,P19132,P36376,Q63617,Q6IG05                                                                                                                 |
| 750 | 1,2,3,5,8,1<br>2,14,16 | 4,6,7,9,10,<br>11,13,15 | 1  | Q6IG05                                                                                                                                             |
| 751 | 1,2,3,5,8,1<br>2,15,16 | 4,6,7,9,10,<br>11,13,14 | 2  | Q6IG05,Q99041                                                                                                                                      |
| 752 | 1,2,3,5,8,1<br>3,14,15 | 4,6,7,9,10,<br>11,12,16 | 3  | P00714,Q62714,Q6IG05                                                                                                                               |
| 753 | 1,2,3,5,8,1<br>3,14,16 | 4,6,7,9,10,<br>11,12,15 | 2  | Q62714,Q9WUW8                                                                                                                                      |
| 754 | 1,2,3,5,8,1<br>3,15,16 | 4,6,7,9,10,<br>11,12,14 | 2  | Q62714,Q6IG05                                                                                                                                      |
| 755 | 1,2,3,5,8,1<br>4,15,16 | 4,6,7,9,10,<br>11,12,13 | 3  | P00714,Q62714,Q6IG05                                                                                                                               |
| 756 | 1,2,3,5,9,1<br>0,11,12 | 4,6,7,8,13,<br>14,15,16 | 3  | Q03191,Q99MH3,Q9Z2L0                                                                                                                               |
| 757 | 1,2,3,5,9,1<br>0,11,13 | 4,6,7,8,12,<br>14,15,16 | 1  | Q9Z2L0                                                                                                                                             |
| 758 | 1,2,3,5,9,1<br>0,11,14 | 4,6,7,8,12,<br>13,15,16 | 1  | Q9Z2L0                                                                                                                                             |
| 759 | 1,2,3,5,9,1<br>0,11,15 | 4,6,7,8,12,<br>13,14,16 | 2  | Q99MH3,Q9Z2L0                                                                                                                                      |
| 760 | 1,2,3,5,9,1<br>0,11,16 | 4,6,7,8,12,<br>13,14,15 | 2  | P70549,Q9Z2L0                                                                                                                                      |
| 761 | 1,2,3,5,9,1<br>0,12,13 | 4,6,7,8,11,<br>14,15,16 | 19 | P02780,P02781,P06761,P07150,P08723,P0C0A9,P11598,P22273,P22282,P22283,P46462,Q03191,Q5M8C6,Q63617,Q6AY61,Q8CJ52,Q99041,Q9QW07,Q9QZK9               |
| 762 | 1,2,3,5,9,1<br>0,12,14 | 4,6,7,8,11,<br>13,15,16 | 21 | P00714,P02780,P02781,P02782,P06761,P08723,P09456,P0C0A9,P11598,P22273,P22282,P22283,P24368,P30120,P36374,P46462,Q5M8C6,Q63617,Q6AY61,Q8CJ52,Q99041 |

|     |                        |                         |    |                                                                                                                                                                         |
|-----|------------------------|-------------------------|----|-------------------------------------------------------------------------------------------------------------------------------------------------------------------------|
| 763 | 1,2,3,5,9,1<br>0,12,15 | 4,6,7,8,11,<br>13,14,16 | 23 | O54728,P00714,P02780,P02781,P02782,P06761,P07647,P08723,P09456,P0C0A9,P11598,P22273,P22282,P22283,P30120,P34901,P46462,Q5M8C6,Q63617,Q6AY61,Q8CFN2,Q99041,Q99MH3        |
| 764 | 1,2,3,5,9,1<br>0,12,16 | 4,6,7,8,11,<br>13,14,15 | 7  | P06761,P11598,P22273,P22282,P46462,Q63617,Q99041                                                                                                                        |
| 765 | 1,2,3,5,9,1<br>0,13,14 | 4,6,7,8,11,<br>12,15,16 | 20 | P00714,P02780,P02781,P02782,P06761,P08723,P0C0A9,P11598,P22273,P22282,P22283,P30120,P36374,P46462,Q5M8C6,Q63617,Q8CJ52,Q99041,Q9QW07,Q9QZK9                             |
| 766 | 1,2,3,5,9,1<br>0,13,15 | 4,6,7,8,11,<br>12,14,16 | 24 | P00714,P02780,P02781,P02782,P06761,P07150,P08723,P0C0A9,P11598,P12020,P22273,P22282,P22283,P30120,P36374,P46462,Q5M8C6,Q63617,Q8CFN2,Q99041,Q99376,Q99MH3,Q9QW07,Q9QZK9 |
| 767 | 1,2,3,5,9,1<br>0,13,16 | 4,6,7,8,11,<br>12,14,15 | 8  | P06761,P07150,P11598,P22273,P22282,P46462,Q63617,Q99041                                                                                                                 |
| 768 | 1,2,3,5,9,1<br>0,14,15 | 4,6,7,8,11,<br>12,13,16 | 22 | P00714,P02780,P02781,P02782,P06761,P07647,P08723,P09456,P0C0A9,P11598,P12020,P22273,P22282,P22283,P24368,P30120,P36374,P46462,Q5M8C6,Q63617,Q8CFN2,Q99041               |
| 769 | 1,2,3,5,9,1<br>0,14,16 | 4,6,7,8,11,<br>12,13,15 | 8  | P00714,P06761,P11598,P22273,P22282,P46462,Q63617,Q99041                                                                                                                 |
| 770 | 1,2,3,5,9,1<br>0,15,16 | 4,6,7,8,11,<br>12,13,14 | 10 | P06761,P11598,P12020,P22273,P22282,P22283,P46462,Q5M8C6,Q63617,Q99041                                                                                                   |
| 771 | 1,2,3,5,9,1<br>1,12,13 | 4,6,7,8,10,<br>14,15,16 | 2  | P54921,Q03191                                                                                                                                                           |
| 772 | 1,2,3,5,9,1<br>1,12,14 | 4,6,7,8,10,<br>13,15,16 | 4  | O70257,P00714,P07151,Q03191                                                                                                                                             |
| 773 | 1,2,3,5,9,1<br>1,12,15 | 4,6,7,8,10,<br>13,14,16 | 2  | Q03191,Q99MH3                                                                                                                                                           |
| 774 | 1,2,3,5,9,1<br>1,12,16 | 4,6,7,8,10,<br>13,14,15 | 1  | Q03191                                                                                                                                                                  |
| 775 | 1,2,3,5,9,1<br>1,13,14 | 4,6,7,8,10,<br>12,15,16 | 1  | P0DMW0;P0DMW1                                                                                                                                                           |
| 776 | 1,2,3,5,9,1<br>1,13,15 | 4,6,7,8,10,<br>12,14,16 | 1  | Q99MH3                                                                                                                                                                  |
| 777 | 1,2,3,5,9,1<br>1,13,16 | 4,6,7,8,10,<br>12,14,15 | 0  |                                                                                                                                                                         |
| 778 | 1,2,3,5,9,1<br>1,14,15 | 4,6,7,8,10,<br>12,13,16 | 2  | P00714,P0DMW0;P0DMW1                                                                                                                                                    |
| 779 | 1,2,3,5,9,1<br>1,14,16 | 4,6,7,8,10,<br>12,13,15 | 0  |                                                                                                                                                                         |
| 780 | 1,2,3,5,9,1<br>1,15,16 | 4,6,7,8,10,<br>12,13,14 | 0  |                                                                                                                                                                         |
| 781 | 1,2,3,5,9,1<br>2,13,14 | 4,6,7,8,10,<br>11,15,16 | 15 | P00714,P02780,P06761,P08723,P0C0A9,P11598,P22273,P22282,P22283,P46462,Q5M8C6,Q63617,Q6AY61,Q99041,Q9QW07                                                                |
| 782 | 1,2,3,5,9,1<br>2,13,15 | 4,6,7,8,10,<br>11,14,16 | 18 | P00714,P02780,P02781,P06761,P07150,P08723,P0C0A9,P11598,P22273,P22282,P22283,P30120,P46462,Q5M8C6,Q63617,Q6AY61,Q99041,Q99MH3                                           |

|     |                         |                         |    |                                                                                                                                             |
|-----|-------------------------|-------------------------|----|---------------------------------------------------------------------------------------------------------------------------------------------|
| 783 | 1,2,3,5,9,1<br>2,13,16  | 4,6,7,8,10,<br>11,14,15 | 7  | P06761,P07150,P0C0A9,P11598,P22273,P22282,Q99041                                                                                            |
| 784 | 1,2,3,5,9,1<br>2,14,15  | 4,6,7,8,10,<br>11,13,16 | 20 | P00714,P02780,P02781,P02782,P06761,P07647,P08723,P09456,P0C0A9,P11598,P22273,P22282,P22283,P24368,P30120,P46462,Q5M8C6,Q63617,Q6AY61,Q99041 |
| 785 | 1,2,3,5,9,1<br>2,14,16  | 4,6,7,8,10,<br>11,13,15 | 8  | P00714,P06761,P11598,P22273,P22282,Q63617,Q6AY61,Q99041                                                                                     |
| 786 | 1,2,3,5,9,1<br>2,15,16  | 4,6,7,8,10,<br>11,13,14 | 9  | P00714,P06761,P11598,P22273,P22282,P46462,Q63617,Q6AY61,Q99041                                                                              |
| 787 | 1,2,3,5,9,1<br>3,14,15  | 4,6,7,8,10,<br>11,12,16 | 19 | P00714,P02780,P02781,P04905,P06761,P08723,P0C0A9,P0DMW0,P0DMW1,P11598,P22273,P22282,P22283,P30120,P36374,P46462,Q5M8C6,Q63617,Q99041,Q9QW07 |
| 788 | 1,2,3,5,9,1<br>3,14,16  | 4,6,7,8,10,<br>11,12,15 | 6  | P06761,P11598,P22273,P22282,Q63617,Q99041                                                                                                   |
| 789 | 1,2,3,5,9,1<br>3,15,16  | 4,6,7,8,10,<br>11,12,14 | 8  | P06761,P07150,P11598,P22273,P22282,P46462,Q63617,Q99041                                                                                     |
| 790 | 1,2,3,5,9,1<br>4,15,16  | 4,6,7,8,10,<br>11,12,13 | 10 | P00714,P06761,P11598,P22273,P22282,P22283,P46462,Q5M8C6,Q63617,Q99041                                                                       |
| 791 | 1,2,3,5,10,<br>11,12,13 | 4,6,7,8,9,1<br>4,15,16  | 1  | P47967                                                                                                                                      |
| 792 | 1,2,3,5,10,<br>11,12,14 | 4,6,7,8,9,1<br>3,15,16  | 0  |                                                                                                                                             |
| 793 | 1,2,3,5,10,<br>11,12,15 | 4,6,7,8,9,1<br>3,14,16  | 0  |                                                                                                                                             |
| 794 | 1,2,3,5,10,<br>11,12,16 | 4,6,7,8,9,1<br>3,14,15  | 0  |                                                                                                                                             |
| 795 | 1,2,3,5,10,<br>11,13,14 | 4,6,7,8,9,1<br>2,15,16  | 0  |                                                                                                                                             |
| 796 | 1,2,3,5,10,<br>11,13,15 | 4,6,7,8,9,1<br>2,14,16  | 1  | P21674                                                                                                                                      |
| 797 | 1,2,3,5,10,<br>11,13,16 | 4,6,7,8,9,1<br>2,14,15  | 0  |                                                                                                                                             |
| 798 | 1,2,3,5,10,<br>11,14,15 | 4,6,7,8,9,1<br>2,13,16  | 1  | P00714                                                                                                                                      |
| 799 | 1,2,3,5,10,<br>11,14,16 | 4,6,7,8,9,1<br>2,13,15  | 0  |                                                                                                                                             |
| 800 | 1,2,3,5,10,<br>11,15,16 | 4,6,7,8,9,1<br>2,13,14  | 0  |                                                                                                                                             |
| 801 | 1,2,3,5,10,<br>12,13,14 | 4,6,7,8,9,1<br>1,15,16  | 17 | P00714,P02780,P06761,P07150,P08723,P0C0A9,P11598,P22273,P22282,P22283,P46462,Q5M8C6,Q63617,Q6AY61,Q8CJ52,Q99041,Q9QW07                      |
| 802 | 1,2,3,5,10,<br>12,13,15 | 4,6,7,8,9,1<br>1,14,16  | 19 | P02780,P06761,P07150,P08723,P09456,P0C0A9,P11598,P22273,P22282,P22283,P46462,Q5M8C6,Q63617,Q6AY61,Q6RUV5,Q812E4,Q8CFN2,Q99041,Q99376        |



|     |                                             |                                                                                                                                                                            |
|-----|---------------------------------------------|----------------------------------------------------------------------------------------------------------------------------------------------------------------------------|
| 803 | 1,2,3,5,10, 4,6,7,8,9,1<br>12,13,16 1,14,15 | 7 P07150,P22273,P22282,Q63617,Q6AY61,Q8CJ52,Q99041                                                                                                                         |
| 804 | 1,2,3,5,10, 4,6,7,8,9,1<br>12,14,15 1,13,16 | 21 P00714,P02780,P02781,P02782,P06761,P08723,P09456,P0C0A9,P11598,P22273,P22282,P22283,P30120,P46462,Q5M8C6,Q62902,Q63617,Q6AY61,Q6RUV5,Q812E4,Q99041                      |
| 805 | 1,2,3,5,10, 4,6,7,8,9,1<br>12,14,16 1,13,15 | 6 P06761,P22273,P22282,Q63617,Q6AY61,Q99041                                                                                                                                |
| 806 | 1,2,3,5,10, 4,6,7,8,9,1<br>12,15,16 1,13,14 | 10 P06761,P07150,P11598,P22273,P22282,P46462,Q63617,Q6AY61,Q812E4,Q99041                                                                                                   |
| 807 | 1,2,3,5,10, 4,6,7,8,9,1<br>13,14,15 1,12,16 | 24 P00714,P02780,P02781,P04905,P06761,P07150,P08723,P09456,P0C0A9,P11598,P22273,P22282,P22283,P30120,P36374,P46462,P63322,P97523,Q5M8C6,Q63617,Q812E4,Q8CFN2,Q99041,Q9QW07 |
| 808 | 1,2,3,5,10, 4,6,7,8,9,1<br>13,14,16 1,12,15 | 5 P07150,P22273,P22282,Q63617,Q9WUW8                                                                                                                                       |
| 809 | 1,2,3,5,10, 4,6,7,8,9,1<br>13,15,16 1,12,14 | 8 P06761,P07150,P22273,P22282,P46462,Q63617,Q812E4,Q99041                                                                                                                  |
| 810 | 1,2,3,5,10, 4,6,7,8,9,1<br>14,15,16 1,12,13 | 8 P00714,P06761,P11598,P22273,P22282,P46462,Q63617,Q99041                                                                                                                  |
| 811 | 1,2,3,5,11, 4,6,7,8,9,1<br>12,13,14 0,15,16 | 1 Q811M5                                                                                                                                                                   |
| 812 | 1,2,3,5,11, 4,6,7,8,9,1<br>12,13,15 0,14,16 | 0                                                                                                                                                                          |
| 813 | 1,2,3,5,11, 4,6,7,8,9,1<br>12,13,16 0,14,15 | 1 P47967                                                                                                                                                                   |
| 814 | 1,2,3,5,11, 4,6,7,8,9,1<br>12,14,15 0,13,16 | 1 P00714                                                                                                                                                                   |
| 815 | 1,2,3,5,11, 4,6,7,8,9,1<br>12,14,16 0,13,15 | 0                                                                                                                                                                          |
| 816 | 1,2,3,5,11, 4,6,7,8,9,1<br>12,15,16 0,13,14 | 0                                                                                                                                                                          |
| 817 | 1,2,3,5,11, 4,6,7,8,9,1<br>13,14,15 0,12,16 | 0                                                                                                                                                                          |
| 818 | 1,2,3,5,11, 4,6,7,8,9,1<br>13,14,16 0,12,15 | 0                                                                                                                                                                          |
| 819 | 1,2,3,5,11, 4,6,7,8,9,1<br>13,15,16 0,12,14 | 1 O70417                                                                                                                                                                   |
| 820 | 1,2,3,5,11, 4,6,7,8,9,1<br>14,15,16 0,12,13 | 0                                                                                                                                                                          |
| 821 | 1,2,3,5,12, 4,6,7,8,9,1<br>13,14,15 0,11,16 | 16 P00714,P02780,P06761,P07150,P08723,P0C0A9,P11598,P22273,P22282,P22283,P46462,Q5M8C6,Q63617,Q6AY61,Q6P6R2,Q99041                                                         |
| 822 | 1,2,3,5,12, 4,6,7,8,9,1<br>13,14,16 0,11,15 | 7 P07150,P22273,P22282,Q63617,Q6AY61,Q6P6R2,Q99041                                                                                                                         |

|     |                         |                               |                                                                                                                                                                                                                                                                                                                    |                                                                                                                                                                                                                                               |
|-----|-------------------------|-------------------------------|--------------------------------------------------------------------------------------------------------------------------------------------------------------------------------------------------------------------------------------------------------------------------------------------------------------------|-----------------------------------------------------------------------------------------------------------------------------------------------------------------------------------------------------------------------------------------------|
| 823 | 1,2,3,5,12,<br>13,15,16 | 4,6,7,8,9,1<br>0,11,14        | 8                                                                                                                                                                                                                                                                                                                  | P06761,P07150,P22273,P22282,Q63617,Q6AY61,Q6P6R2,Q99041                                                                                                                                                                                       |
| 824 | 1,2,3,5,12,<br>14,15,16 | 4,6,7,8,9,1<br>0,11,13        | 9                                                                                                                                                                                                                                                                                                                  | P00714,P06761,P11598,P22273,P22282,Q63617,Q6AY61,Q6P6R2,Q99041                                                                                                                                                                                |
| 825 | 1,2,3,5,13,<br>14,15,16 | 4,6,7,8,9,1<br>0,11,12        | 7                                                                                                                                                                                                                                                                                                                  | P06761,P07150,P22273,P22282,Q62714,Q63617,Q6P6R2                                                                                                                                                                                              |
| 826 | 1,2,3,6,7,8,<br>9,10    | 4,5,11,12,<br>13,14,15,1<br>6 | iRT-<br>16                                                                                                                                                                                                                                                                                                         | Kit_WR_fusion,O35763,O70377,O70594,P02631,P19629,P20766,P23739,P55091,P70545,P97580,Q05175,Q63598,Q63618,Q6P6R2,Q99MH3                                                                                                                        |
| 827 | 1,2,3,6,7,8,<br>9,11    | 4,5,10,12,<br>13,14,15,1<br>6 | iRT-<br>18                                                                                                                                                                                                                                                                                                         | Kit_WR_fusion,P06911,P08723,P12020,P19629,P35280,P50280,P55091,P63029,Q5GRG2,Q63493,Q6P6R2,Q6P6S4,Q78P75,Q812E4,Q99MH3,Q9JHB9,Q9JI85                                                                                                          |
| 828 | 1,2,3,6,7,8,<br>9,12    | 4,5,10,11,<br>13,14,15,1<br>6 | 5                                                                                                                                                                                                                                                                                                                  | iRT-Kit_WR_fusion,P06911,P19629,Q63598,Q99MH3                                                                                                                                                                                                 |
| 829 | 1,2,3,6,7,8,<br>9,13    | 4,5,10,11,<br>12,14,15,1<br>6 | 3                                                                                                                                                                                                                                                                                                                  | iRT-Kit_WR_fusion,P02631,P19629                                                                                                                                                                                                               |
| 830 | 1,2,3,6,7,8,<br>9,14    | 4,5,10,11,<br>12,13,15,1<br>6 | 5                                                                                                                                                                                                                                                                                                                  | iRT-Kit_WR_fusion,P08937,P97580,Q5QE79,Q63751                                                                                                                                                                                                 |
| 831 | 1,2,3,6,7,8,<br>9,15    | 4,5,10,11,<br>12,13,14,1<br>6 | 6                                                                                                                                                                                                                                                                                                                  | iRT-Kit_WR_fusion,P02091,P19629,P35280,Q63598,Q99MH3                                                                                                                                                                                          |
| 832 | 1,2,3,6,7,8,<br>9,16    | 4,5,10,11,<br>12,13,14,1<br>5 | 5                                                                                                                                                                                                                                                                                                                  | iRT-Kit_WR_fusion,P19629,P23739,Q09030,Q63598                                                                                                                                                                                                 |
| 833 | 1,2,3,6,7,8,<br>10,11   | 4,5,9,12,1<br>3,14,15,16      | iRT-<br>23                                                                                                                                                                                                                                                                                                         | Kit_WR_fusion,P02631,P06911,P08723,P12020,P15399,P18757,P19629,P20766,P22283,P31044,P50280,P55091,P63029,P97580,Q5GRG2,Q63493,Q66H69,Q68G31,Q6P6S4,Q9JHB9,Q9JI85,Q9WTW7                                                                       |
| 834 | 1,2,3,6,7,8,<br>10,12   | 4,5,9,11,1<br>3,14,15,16      | iRT-<br>33                                                                                                                                                                                                                                                                                                         | Kit_WR_fusion,O35763,O70377,P02631,P06911,P18757,P19468,P19629,P20766,P30904,P31044,P38918,P46844,P48508,P53790,P57113,P97580,Q05175,Q3ZAV1,Q5RLM2,Q63598,Q63618,Q64602,Q66H69,Q66HG3,Q6AY41,Q6MG61,Q6Q0N1,Q80W57,Q91ZS3,Q923S2,Q9QYU4,Q9WTW7 |
| 835 | 1,2,3,6,7,8,<br>10,13   | 4,5,9,11,1<br>2,14,15,16      | O35763,O70257,O70377,O70594,O88339;Q4V882,P02631,P19468,P19629,P20766,P25809,P29975,P30904,P31044,P36860,P38918,P46844,P48508,P51907,P53790,P55091,P57113,P97580,Q05175,Q3T1J9,Q3ZAV1,Q5I0E9,Q62714,Q63424,Q63598,Q63618,Q64093,Q66H69,Q66HG3,Q68G31,Q6AY41,Q6MG61,Q6Q0N1,Q80W57,Q9WTW7,Q9WUW8,Q9WUW9,Q9Z0W7<br>42 |                                                                                                                                                                                                                                               |

|     |                       |                          |    |                                                                                                                                                                                                                                                                                                                                                                                                                                                                                                                                                                                                                                                                                                                                                                                                                                                                                                                                                                                                                                                                                                                                                                                                                                                                                                                                                                                                                                                                                                                                                                                                                                                                                                                                                                                                                                                                                                                                                                                                                                                                                                                                                                                                                                                                                            |
|-----|-----------------------|--------------------------|----|--------------------------------------------------------------------------------------------------------------------------------------------------------------------------------------------------------------------------------------------------------------------------------------------------------------------------------------------------------------------------------------------------------------------------------------------------------------------------------------------------------------------------------------------------------------------------------------------------------------------------------------------------------------------------------------------------------------------------------------------------------------------------------------------------------------------------------------------------------------------------------------------------------------------------------------------------------------------------------------------------------------------------------------------------------------------------------------------------------------------------------------------------------------------------------------------------------------------------------------------------------------------------------------------------------------------------------------------------------------------------------------------------------------------------------------------------------------------------------------------------------------------------------------------------------------------------------------------------------------------------------------------------------------------------------------------------------------------------------------------------------------------------------------------------------------------------------------------------------------------------------------------------------------------------------------------------------------------------------------------------------------------------------------------------------------------------------------------------------------------------------------------------------------------------------------------------------------------------------------------------------------------------------------------|
| 836 | 1,2,3,6,7,8<br>,10,14 | 4,5,9,11,1<br>2,13,15,16 | 33 | O70377,O70594,O88339;Q4V882,P02631,P08937,P18757,P19468,P19629,P20766,P31044,P46844,P48508,P53790,P54921,P57113,P63081,P97580,Q05175,Q5I0E9,Q5QE79,Q5RLM2,Q62714,Q63598,Q63618,Q63751,Q64602,Q66HG3,Q68G31,Q80W57,Q923S2,Q9WTW7,Q9WUW8,Q9WUW9<br>iRT-<br>Kit_WR_fusion,O35763,O70377,O70594,O88339;Q4V882,P02091,P02631,P15399,P18757,P19468,P19629,P20766,P23928,P29975,P30904,P31044,P38918,P46844,P48508,P51907,P53790,P54921,P57113,P68035,P68136,P97580,Q03248,Q05175,Q3T1J9,Q3ZAV1,Q498D9,Q5I0E9,Q5M7T9,Q5RKI1,Q62714,Q63270,Q63424,Q63598,Q63618,Q64093,Q64602,Q6AY41,Q6MG61,Q6Q0N1,Q80W57,Q8R431,Q923S2,Q9JJ19,Q9JLJ3,Q9QYU4,Q9R1T5,Q9WTW7,Q9Z0W7<br>iRT-<br>Kit_WR_fusion,O35763,O70257,O70377,O70594,O88339;Q4V882,P02631,P02783,P07151,P15399,P18757,P19468,P19629,P20766,P23928,P29975,P31044,P38918,P46720,P46844,P48508,P51907,P53790,P57113,P60711;P63259,P68035;P68136,P97580,Q03248,Q05175,Q30KJ2,Q3T1J9,Q3ZAV1,Q5I0E9,Q5M7T9,Q62687,Q62761,Q62762,Q62763,Q63270,Q63424,Q63598,Q63618,Q64093,Q64602,Q66HG3,Q68FT5,Q6AY33,Q6AY41,Q6MG61,Q6Q0N1,Q71MB6,Q80W57,Q8R431,Q923S2,Q9JJ19,Q9JJ40,Q9JLJ3,Q9QYU4,Q9R1T5,Q9WTW7,Q9WUW8,Q9WUW9,Q9Z0W7<br>iRT-<br>20 Kit_WR_fusion,P06911,P08723,P12020,P19629,P22283,P31044,P31430,P46462,P50280,P63029,P70709,Q5GRG2,Q63493,Q66H69,Q6IG05,Q78P75,Q9JHB9,Q9JI85,Q9QW07<br>iRT-<br>17 Kit_WR_fusion,P06911,P08723,P12020,P19629,P22283,P31044,P46462,P50280,P63029,Q5GRG2,Q63493,Q66H69,Q68G31,Q78P75,Q9JHB9,Q9JI85<br>iRT-<br>16 Kit_WR_fusion,P06911,P08723,P08937,P12020,P19629,P22283,P31044,P50280,P63029,P97580,Q5GRG2,Q63493,Q63751,Q9JHB9,Q9JI85<br>iRT-<br>20 Kit_WR_fusion,P02091,P06911,P08723,P12020,P19629,P31044,P50280,Q5GRG2,Q63493,Q6IFU7,Q6IFW6,Q6IG05,Q6IMF3,Q6P6S4,Q6Q0N0,Q8CJ52,Q9JHB9,Q9JI85,Q9QW07<br>iRT-<br>Kit_WR_fusion,O35547,P02780,P02781,P02782,P02783,P05369,P06761,P06911,P07647,P08010,P08723,P09456,P0C0A9,P12020,P19629,P22283,P24368,P30120,P31044,P46462,P50280,P63029,P97580,Q00715,Q5GRG2,Q5M8C6,Q63493,Q66H69,Q6Q0N0,Q9JHB9,Q9JI85,Q9QW07,Q9WTW7<br>9 iRT-Kit_WR_fusion,P01835,P02631,P06911,P19629,P31044,Q63598,Q66H69,Q9JI85<br>41 iRT-Kit_WR_fusion,P06911,P08937,P12020,P19629,P31044,P97580,Q5GRG2,Q5RLM2,Q63751<br>8 iRT-Kit_WR_fusion,P02091,P06911,P19629,P31044,Q63598,Q6IG05,Q9WTW7 |
| 837 | 1,2,3,6,7,8<br>,10,15 | 4,5,9,11,1<br>2,13,14,16 | 52 |                                                                                                                                                                                                                                                                                                                                                                                                                                                                                                                                                                                                                                                                                                                                                                                                                                                                                                                                                                                                                                                                                                                                                                                                                                                                                                                                                                                                                                                                                                                                                                                                                                                                                                                                                                                                                                                                                                                                                                                                                                                                                                                                                                                                                                                                                            |
| 838 | 1,2,3,6,7,8<br>,10,16 | 4,5,9,11,1<br>2,13,14,15 | 61 |                                                                                                                                                                                                                                                                                                                                                                                                                                                                                                                                                                                                                                                                                                                                                                                                                                                                                                                                                                                                                                                                                                                                                                                                                                                                                                                                                                                                                                                                                                                                                                                                                                                                                                                                                                                                                                                                                                                                                                                                                                                                                                                                                                                                                                                                                            |
| 839 | 1,2,3,6,7,8<br>,11,12 | 4,5,9,10,1<br>3,14,15,16 | 20 |                                                                                                                                                                                                                                                                                                                                                                                                                                                                                                                                                                                                                                                                                                                                                                                                                                                                                                                                                                                                                                                                                                                                                                                                                                                                                                                                                                                                                                                                                                                                                                                                                                                                                                                                                                                                                                                                                                                                                                                                                                                                                                                                                                                                                                                                                            |
| 840 | 1,2,3,6,7,8<br>,11,13 | 4,5,9,10,1<br>2,14,15,16 | 17 |                                                                                                                                                                                                                                                                                                                                                                                                                                                                                                                                                                                                                                                                                                                                                                                                                                                                                                                                                                                                                                                                                                                                                                                                                                                                                                                                                                                                                                                                                                                                                                                                                                                                                                                                                                                                                                                                                                                                                                                                                                                                                                                                                                                                                                                                                            |
| 841 | 1,2,3,6,7,8<br>,11,14 | 4,5,9,10,1<br>2,13,15,16 | 16 |                                                                                                                                                                                                                                                                                                                                                                                                                                                                                                                                                                                                                                                                                                                                                                                                                                                                                                                                                                                                                                                                                                                                                                                                                                                                                                                                                                                                                                                                                                                                                                                                                                                                                                                                                                                                                                                                                                                                                                                                                                                                                                                                                                                                                                                                                            |
| 842 | 1,2,3,6,7,8<br>,11,15 | 4,5,9,10,1<br>2,13,14,16 | 20 |                                                                                                                                                                                                                                                                                                                                                                                                                                                                                                                                                                                                                                                                                                                                                                                                                                                                                                                                                                                                                                                                                                                                                                                                                                                                                                                                                                                                                                                                                                                                                                                                                                                                                                                                                                                                                                                                                                                                                                                                                                                                                                                                                                                                                                                                                            |
| 843 | 1,2,3,6,7,8<br>,11,16 | 4,5,9,10,1<br>2,13,14,15 | 34 |                                                                                                                                                                                                                                                                                                                                                                                                                                                                                                                                                                                                                                                                                                                                                                                                                                                                                                                                                                                                                                                                                                                                                                                                                                                                                                                                                                                                                                                                                                                                                                                                                                                                                                                                                                                                                                                                                                                                                                                                                                                                                                                                                                                                                                                                                            |
| 844 | 1,2,3,6,7,8<br>,12,13 | 4,5,9,10,1<br>1,14,15,16 | 9  |                                                                                                                                                                                                                                                                                                                                                                                                                                                                                                                                                                                                                                                                                                                                                                                                                                                                                                                                                                                                                                                                                                                                                                                                                                                                                                                                                                                                                                                                                                                                                                                                                                                                                                                                                                                                                                                                                                                                                                                                                                                                                                                                                                                                                                                                                            |
| 845 | 1,2,3,6,7,8<br>,12,14 | 4,5,9,10,1<br>1,13,15,16 | 10 |                                                                                                                                                                                                                                                                                                                                                                                                                                                                                                                                                                                                                                                                                                                                                                                                                                                                                                                                                                                                                                                                                                                                                                                                                                                                                                                                                                                                                                                                                                                                                                                                                                                                                                                                                                                                                                                                                                                                                                                                                                                                                                                                                                                                                                                                                            |
| 846 | 1,2,3,6,7,8<br>,12,15 | 4,5,9,10,1<br>1,13,14,16 | 8  |                                                                                                                                                                                                                                                                                                                                                                                                                                                                                                                                                                                                                                                                                                                                                                                                                                                                                                                                                                                                                                                                                                                                                                                                                                                                                                                                                                                                                                                                                                                                                                                                                                                                                                                                                                                                                                                                                                                                                                                                                                                                                                                                                                                                                                                                                            |

847 1,2,3,6,7,8 4,5,9,10,1  
,12,16 1,13,14,15

848 1,2,3,6,7,8 4,5,9,10,1  
,13,14 1,12,15,16

849 1,2,3,6,7,8 4,5,9,10,1  
,13,15 1,12,14,16

850 1,2,3,6,7,8 4,5,9,10,1  
,13,16 1,12,14,15

851 1,2,3,6,7,8 4,5,9,10,1  
,14,15 1,12,13,16

852 1,2,3,6,7,8 4,5,9,10,1  
,14,16 1,12,13,15

853 1,2,3,6,7,8 4,5,9,10,1  
,15,16 1,12,13,14

854 1,2,3,6,7,9 4,5,8,12,1  
,10,11 3,14,15,16

855 1,2,3,6,7,9 4,5,8,11,1  
,10,12 3,14,15,16

856 1,2,3,6,7,9 4,5,8,11,1  
,10,13 2,14,15,16

857 1,2,3,6,7,9 4,5,8,11,1  
,10,14 2,13,15,16

858 1,2,3,6,7,9 4,5,8,11,1  
,10,15 2,13,14,16

859 1,2,3,6,7,9 4,5,8,11,1  
,10,16 2,13,14,15

860 1,2,3,6,7,9 4,5,8,10,1  
,11,12 3,14,15,16

861 1,2,3,6,7,9 4,5,8,10,1  
,11,13 2,14,15,16

862 1,2,3,6,7,9 4,5,8,10,1  
,11,14 2,13,15,16

863 1,2,3,6,7,9 4,5,8,10,1  
,11,15 2,13,14,16

iRT-  
11 Kit\_WR\_fusion,P02783,P06911,P12020,P19629,P46844,P57113,Q63598,Q66H69,Q9JHB9,Q9WT  
W7

11 P01835,P06911,P08937,P31044,P63081,P97580,Q5QE79,Q62714,Q66H69,Q68G31,Q9WUW8

10 iRT-Kit\_WR\_fusion,O70594,P01835,P02091,P19629,Q62714,Q63598,Q66H69,Q68G31,Q6Q0N1

iRT-  
19 Kit\_WR\_fusion,O70257,O70594,P01835,P02631,P19468,P19629,P46844,P57113,P97580,Q3ZAV  
1,Q62714,Q63424,Q63598,Q66H69,Q6AY41,Q9JI85,Q9WTW7,Q9WUW8

8 iRT-Kit\_WR\_fusion,P02091,P19629,P50280,P54921,P97580,Q62714,Q62812

iRT-  
13 Kit\_WR\_fusion,P02783,P06911,P19629,P46844,P50280,P57113,P63081,P97580,Q62714,Q62812,  
Q923S2,Q9WUW8

iRT-  
Kit\_WR\_fusion,O70377,O70594,P02091,P02783,P09606,P15399,P17988,P19468,P19629,P29975,  
35 P38918,P46844,P48508,P50280,P53790,P57113,P97580,Q03248,Q05175,Q3ZAV1,Q5I0E9,Q5M  
7T9,Q62714,Q62812,Q63270,Q63424,Q63598,Q64093,Q6AY41,Q6Q0N1,Q80W57,Q9R1T5,Q9  
WTW7,Q9Z0W7

2 P20766,Q99MH3

3 O54728,P20766,Q99MH3

2 P01835,P20766

0

6 O54728,P02091,P20766,Q5RKI1,Q63598,Q99MH3

3 P20766,P23739,Q63598

1 Q99MH3

1 P0DMW0;P0DMW1

1 P0DMW0;P0DMW1

3 P02091,P35280,Q99MH3

|     |                        |                          |   |                                                         |
|-----|------------------------|--------------------------|---|---------------------------------------------------------|
| 864 | 1,2,3,6,7,9<br>,11,16  | 4,5,8,10,1<br>2,13,14,15 | 2 | P02783,Q9JHB9                                           |
| 865 | 1,2,3,6,7,9<br>,12,13  | 4,5,8,10,1<br>1,14,15,16 | 1 | P01835                                                  |
| 866 | 1,2,3,6,7,9<br>,12,14  | 4,5,8,10,1<br>1,13,15,16 | 0 |                                                         |
| 867 | 1,2,3,6,7,9<br>,12,15  | 4,5,8,10,1<br>1,13,14,16 | 4 | O54728,P02091,Q6AY61,Q99MH3                             |
| 868 | 1,2,3,6,7,9<br>,12,16  | 4,5,8,10,1<br>1,13,14,15 | 0 |                                                         |
| 869 | 1,2,3,6,7,9<br>,13,14  | 4,5,8,10,1<br>1,12,15,16 | 2 | P01835,P0DMW0;P0DMW1                                    |
| 870 | 1,2,3,6,7,9<br>,13,15  | 4,5,8,10,1<br>1,12,14,16 | 2 | P01835,P02091                                           |
| 871 | 1,2,3,6,7,9<br>,13,16  | 4,5,8,10,1<br>1,12,14,15 | 1 | P01835                                                  |
| 872 | 1,2,3,6,7,9<br>,14,15  | 4,5,8,10,1<br>1,12,13,16 | 2 | P02091,P0DMW0;P0DMW1                                    |
| 873 | 1,2,3,6,7,9<br>,14,16  | 4,5,8,10,1<br>1,12,13,15 | 2 | P02783,Q09030                                           |
| 874 | 1,2,3,6,7,9<br>,15,16  | 4,5,8,10,1<br>1,12,13,14 | 1 | P02091                                                  |
| 875 | 1,2,3,6,7,1<br>0,11,12 | 4,5,8,9,13,<br>14,15,16  | 1 | P20766                                                  |
| 876 | 1,2,3,6,7,1<br>0,11,13 | 4,5,8,9,12,<br>14,15,16  | 3 | P01835,P20766,Q68G31                                    |
| 877 | 1,2,3,6,7,1<br>0,11,14 | 4,5,8,9,12,<br>13,15,16  | 1 | P63029                                                  |
| 878 | 1,2,3,6,7,1<br>0,11,15 | 4,5,8,9,12,<br>13,14,16  | 4 | P02091,P08721,P20766,Q5RKI1                             |
| 879 | 1,2,3,6,7,1<br>0,11,16 | 4,5,8,9,12,<br>13,14,15  | 4 | P02783,P20766,Q9JHB9,Q9WTW7                             |
| 880 | 1,2,3,6,7,1<br>0,12,13 | 4,5,8,9,11,<br>14,15,16  | 5 | P01835,P20766,Q63598,Q66HG3,Q6AY61                      |
| 881 | 1,2,3,6,7,1<br>0,12,14 | 4,5,8,9,11,<br>13,15,16  | 4 | P01835,P57113,Q5RLM2,Q6AY61                             |
| 882 | 1,2,3,6,7,1<br>0,12,15 | 4,5,8,9,11,<br>13,14,16  | 8 | O54728,P02091,P19629,P20766,Q5RKI1,Q63598,Q6AY61,Q9WTW7 |
| 883 | 1,2,3,6,7,1<br>0,12,16 | 4,5,8,9,11,<br>13,14,15  | 8 | P18297,P19468,P20766,P46844,P57113,Q63598,Q71MB6,Q9WTW7 |

|     |                        |                         |    |                                                                                                                                                                                                                   |
|-----|------------------------|-------------------------|----|-------------------------------------------------------------------------------------------------------------------------------------------------------------------------------------------------------------------|
| 884 | 1,2,3,6,7,1<br>0,13,14 | 4,5,8,9,11,<br>12,15,16 | 5  | O54800;Q5DWV2,P01835,P57113,Q62714,Q9WUW8                                                                                                                                                                         |
| 885 | 1,2,3,6,7,1<br>0,13,15 | 4,5,8,9,11,<br>12,14,16 | 11 | O70594,O88339;Q4V882,P01835,P02091,P19468,P20766,P57113,Q5RKI1,Q62714,Q63598,Q63618                                                                                                                               |
| 886 | 1,2,3,6,7,1<br>0,13,16 | 4,5,8,9,11,<br>12,14,15 | 13 | O70594,P01835,P18297,P19468,P20766,P29975,P46844,P57113,Q63424,Q63598,Q64093,Q9W7,TW7,Q9WUW8                                                                                                                      |
| 887 | 1,2,3,6,7,1<br>0,14,15 | 4,5,8,9,11,<br>12,13,16 | 8  | O88339;Q4V882,P01835,P01946,P02091,P54921,P57113,Q5RKI1,Q62714                                                                                                                                                    |
| 888 | 1,2,3,6,7,1<br>0,14,16 | 4,5,8,9,11,<br>12,13,15 | 8  | P01835,P02783,P18297,P19468,P46844,P57113,Q71MB6,Q9WUW8                                                                                                                                                           |
| 889 | 1,2,3,6,7,1<br>0,15,16 | 4,5,8,9,11,<br>12,13,14 | 30 | O70377,O70594,P01835,P02091,P02783,P17988,P18297,P19468,P19629,P20766,P29975,P38918,P46844,P48508,P53790,P57113,P63095,Q03248,Q05175,Q5I0E9,Q5RKI1,Q63270,Q63424,Q63598,Q64093,Q6Q0N1,Q71MB6,Q80W57,Q9WTW7,Q9ZOW7 |
| 890 | 1,2,3,6,7,1<br>1,12,13 | 4,5,8,9,10,<br>14,15,16 | 2  | P01835,P47967                                                                                                                                                                                                     |
| 891 | 1,2,3,6,7,1<br>1,12,14 | 4,5,8,9,10,<br>13,15,16 | 1  | Q5GRG2                                                                                                                                                                                                            |
| 892 | 1,2,3,6,7,1<br>1,12,15 | 4,5,8,9,10,<br>13,14,16 | 1  | P02091                                                                                                                                                                                                            |
| 893 | 1,2,3,6,7,1<br>1,12,16 | 4,5,8,9,10,<br>13,14,15 | 4  | P02783,P05369,Q00715,Q9JHB9                                                                                                                                                                                       |
| 894 | 1,2,3,6,7,1<br>1,13,14 | 4,5,8,9,10,<br>12,15,16 | 2  | P01835,P63029                                                                                                                                                                                                     |
| 895 | 1,2,3,6,7,1<br>1,13,15 | 4,5,8,9,10,<br>12,14,16 | 2  | P01835,P02091                                                                                                                                                                                                     |
| 896 | 1,2,3,6,7,1<br>1,13,16 | 4,5,8,9,10,<br>12,14,15 | 3  | P01835,P02783,P05369                                                                                                                                                                                              |
| 897 | 1,2,3,6,7,1<br>1,14,15 | 4,5,8,9,10,<br>12,13,16 | 1  | P02091                                                                                                                                                                                                            |
| 898 | 1,2,3,6,7,1<br>1,14,16 | 4,5,8,9,10,<br>12,13,15 | 2  | P02783,Q9JHB9                                                                                                                                                                                                     |
| 899 | 1,2,3,6,7,1<br>1,15,16 | 4,5,8,9,10,<br>12,13,14 | 5  | P02091,P02783,P08721,P17988,Q8CJ52                                                                                                                                                                                |
| 900 | 1,2,3,6,7,1<br>2,13,14 | 4,5,8,9,10,<br>11,15,16 | 2  | P01835,Q6AY61                                                                                                                                                                                                     |
| 901 | 1,2,3,6,7,1<br>2,13,15 | 4,5,8,9,10,<br>11,14,16 | 2  | P01835,Q6AY61                                                                                                                                                                                                     |
| 902 | 1,2,3,6,7,1<br>2,13,16 | 4,5,8,9,10,<br>11,14,15 | 1  | P01835                                                                                                                                                                                                            |
| 903 | 1,2,3,6,7,1<br>2,14,15 | 4,5,8,9,10,<br>11,13,16 | 3  | P01835,P02091,Q6AY61                                                                                                                                                                                              |

|     |                        |                          |   |                                                  |
|-----|------------------------|--------------------------|---|--------------------------------------------------|
| 904 | 1,2,3,6,7,1<br>2,14,16 | 4,5,8,9,10,<br>11,13,15  | 2 | P01835,P02783                                    |
| 905 | 1,2,3,6,7,1<br>2,15,16 | 4,5,8,9,10,<br>11,13,14  | 6 | P01835,P02091,P02783,P17988,Q63598,Q6AY61        |
| 906 | 1,2,3,6,7,1<br>3,14,15 | 4,5,8,9,10,<br>11,12,16  | 3 | P01835,P02091,Q62714                             |
| 907 | 1,2,3,6,7,1<br>3,14,16 | 4,5,8,9,10,<br>11,12,15  | 4 | P01835,P02783,Q62714,Q9WUW8                      |
| 908 | 1,2,3,6,7,1<br>3,15,16 | 4,5,8,9,10,<br>11,12,14  | 3 | P01835,P02091,Q62714                             |
| 909 | 1,2,3,6,7,1<br>4,15,16 | 4,5,8,9,10,<br>11,12,13  | 4 | P01835,P02091,P02783,Q62714                      |
| 910 | 1,2,3,6,8,9<br>,10,11  | 4,5,7,12,1<br>3,14,15,16 | 4 | P63029,Q68G31,Q6P6S4,Q99MH3                      |
| 911 | 1,2,3,6,8,9<br>,10,12  | 4,5,7,11,1<br>3,14,15,16 | 1 | Q99MH3                                           |
| 912 | 1,2,3,6,8,9<br>,10,13  | 4,5,7,11,1<br>2,14,15,16 | 3 | P97580,Q68G31,Q99MH3                             |
| 913 | 1,2,3,6,8,9<br>,10,14  | 4,5,7,11,1<br>2,13,15,16 | 6 | P97580,P97840,Q06000,Q09030,Q68G31,Q99MH3        |
| 914 | 1,2,3,6,8,9<br>,10,15  | 4,5,7,11,1<br>2,13,14,16 | 7 | P02091,P19629,P36376,P97580,Q63598,Q68G31,Q99MH3 |
| 915 | 1,2,3,6,8,9<br>,10,16  | 4,5,7,11,1<br>2,13,14,15 | 5 | P15399,P97580,Q09030,Q30KJ2,Q63598               |
| 916 | 1,2,3,6,8,9<br>,11,12  | 4,5,7,10,1<br>3,14,15,16 | 5 | P09527,P63029,Q5GRG2,Q6P6S4,Q99MH3               |
| 917 | 1,2,3,6,8,9<br>,11,13  | 4,5,7,10,1<br>2,14,15,16 | 5 | P63029,Q68G31,Q6P6S4,Q99MH3,Q9JI85               |
| 918 | 1,2,3,6,8,9<br>,11,14  | 4,5,7,10,1<br>2,13,15,16 | 4 | P0DMW0;P0DMW1,P63029,Q5GRG2,Q6P6S4               |
| 919 | 1,2,3,6,8,9<br>,11,15  | 4,5,7,10,1<br>2,13,14,16 | 4 | P02091,P36376,Q6P6S4,Q99MH3                      |
| 920 | 1,2,3,6,8,9<br>,11,16  | 4,5,7,10,1<br>2,13,14,15 | 3 | P02783,P50280,Q6P6S4                             |
| 921 | 1,2,3,6,8,9<br>,12,13  | 4,5,7,10,1<br>1,14,15,16 | 2 | Q09030,Q99MH3                                    |
| 922 | 1,2,3,6,8,9<br>,12,14  | 4,5,7,10,1<br>1,13,15,16 | 2 | Q09030,Q99MH3                                    |
| 923 | 1,2,3,6,8,9<br>,12,15  | 4,5,7,10,1<br>1,13,14,16 | 3 | P02091,P36376,Q99MH3                             |

|     |                        |                          |    |                                                                                                   |
|-----|------------------------|--------------------------|----|---------------------------------------------------------------------------------------------------|
| 924 | 1,2,3,6,8,9<br>,12,16  | 4,5,7,10,1<br>1,13,14,15 | 1  | Q09030                                                                                            |
| 925 | 1,2,3,6,8,9<br>,13,14  | 4,5,7,10,1<br>1,12,15,16 | 4  | P0DMW0;P0DMW1,P97580,Q09030,Q68G31                                                                |
| 926 | 1,2,3,6,8,9<br>,13,15  | 4,5,7,10,1<br>1,12,14,16 | 3  | P02091,Q68G31,Q99MH3                                                                              |
| 927 | 1,2,3,6,8,9<br>,13,16  | 4,5,7,10,1<br>1,12,14,15 | 2  | P97580,Q09030                                                                                     |
| 928 | 1,2,3,6,8,9<br>,14,15  | 4,5,7,10,1<br>1,12,13,16 | 5  | P00714,P02091,P97580,P97840,Q99MH3                                                                |
| 929 | 1,2,3,6,8,9<br>,14,16  | 4,5,7,10,1<br>1,12,13,15 | 5  | P02783,P23593,P97580,P97840,Q09030                                                                |
| 930 | 1,2,3,6,8,9<br>,15,16  | 4,5,7,10,1<br>1,12,13,14 | 3  | P02091,P23593,Q99MH3                                                                              |
| 931 | 1,2,3,6,8,1<br>0,11,12 | 4,5,7,9,13,<br>14,15,16  | 5  | P12020,P63029,Q5GRG2,Q68G31,Q9JI85                                                                |
| 932 | 1,2,3,6,8,1<br>0,11,13 | 4,5,7,9,12,<br>14,15,16  | 5  | P15399,P63029,P97580,Q68G31,Q9JI85                                                                |
| 933 | 1,2,3,6,8,1<br>0,11,14 | 4,5,7,9,12,<br>13,15,16  | 5  | P15399,P63029,P97580,Q5GRG2,Q68G31                                                                |
| 934 | 1,2,3,6,8,1<br>0,11,15 | 4,5,7,9,12,<br>13,14,16  | 11 | P01946,P02091,P15399,P19629,P63029,P97580,Q68G31,Q6IFU7,Q6IFW6,Q6P6S4,Q99MH3                      |
| 935 | 1,2,3,6,8,1<br>0,11,16 | 4,5,7,9,12,<br>13,14,15  | 9  | P02783,P15399,P19629,P50280,P63029,P97580,Q30KJ2,Q68G31,Q9JI85                                    |
| 936 | 1,2,3,6,8,1<br>0,12,13 | 4,5,7,9,11,<br>14,15,16  | 4  | P02631,P97580,Q63598,Q68G31                                                                       |
| 937 | 1,2,3,6,8,1<br>0,12,14 | 4,5,7,9,11,<br>13,15,16  | 2  | P97580,Q68G31                                                                                     |
| 938 | 1,2,3,6,8,1<br>0,12,15 | 4,5,7,9,11,<br>13,14,16  | 6  | P02091,P19629,P97580,Q498D9,Q63598,Q99MH3                                                         |
| 939 | 1,2,3,6,8,1<br>0,12,16 | 4,5,7,9,11,<br>13,14,15  | 7  | P15399,P19629,P46844,P97580,Q30KJ2,Q63598,Q9WTW7                                                  |
| 940 | 1,2,3,6,8,1<br>0,13,14 | 4,5,7,9,11,<br>12,15,16  | 5  | O54800;Q5DWV2,P14668,P15399,P97580,Q68G31                                                         |
| 941 | 1,2,3,6,8,1<br>0,13,15 | 4,5,7,9,11,<br>12,14,16  | 13 | O70377,O70594,O88339;Q4V882,P01946,P02091,P15399,P19629,P97580,Q498D9,Q62714,Q63598,Q63618,Q68G31 |
| 942 | 1,2,3,6,8,1<br>0,13,16 | 4,5,7,9,11,<br>12,14,15  | 9  | O70377,P15399,P19468,P46844,P97580,Q30KJ2,Q63424,Q63598,Q68G31                                    |
| 943 | 1,2,3,6,8,1<br>0,14,15 | 4,5,7,9,11,<br>12,13,16  | 10 | O70377,O88339;Q4V882,P01946,P02091,P15399,P19629,P54921,P97580,Q62714,Q68G31                      |



|     |                        |                         |    |                                                                                                                                                                                                     |
|-----|------------------------|-------------------------|----|-----------------------------------------------------------------------------------------------------------------------------------------------------------------------------------------------------|
| 944 | 1,2,3,6,8,1<br>0,14,16 | 4,5,7,9,11,<br>12,13,15 | 9  | O70377,P02783,P14668,P15399,P46844,P57113,P97580,Q30KJ2,Q68G31                                                                                                                                      |
| 945 | 1,2,3,6,8,1<br>0,15,16 | 4,5,7,9,11,<br>12,13,14 | 27 | O70377,O70594,O88339;Q4V882,P01946,P02091,P02783,P15399,P19468,P19629,P38918,P46844,P48508,P53790,P57113,P97580,Q05175,Q30KJ2,Q3ZAV1,Q63424,Q63598,Q64093,Q68G31,Q6AY41,Q6Q0N1,Q80W57,Q9WTW7,Q9Z0W7 |
| 946 | 1,2,3,6,8,1<br>1,12,13 | 4,5,7,9,10,<br>14,15,16 | 5  | P12020,P63029,Q5GRG2,Q68G31,Q9JI85                                                                                                                                                                  |
| 947 | 1,2,3,6,8,1<br>1,12,14 | 4,5,7,9,10,<br>13,15,16 | 5  | P06911,P12020,P63029,Q5GRG2,Q9JI85                                                                                                                                                                  |
| 948 | 1,2,3,6,8,1<br>1,12,15 | 4,5,7,9,10,<br>13,14,16 | 8  | P02091,P12020,Q5GRG2,Q6IFU7,Q6IFW6,Q6IG05,Q6P6S4,Q99MH3                                                                                                                                             |
| 949 | 1,2,3,6,8,1<br>1,12,16 | 4,5,7,9,10,<br>13,14,15 | 9  | P02783,P12020,P30120,P50280,Q00715,Q5GRG2,Q6IG05,Q9JHB9,Q9JI85                                                                                                                                      |
| 950 | 1,2,3,6,8,1<br>1,13,14 | 4,5,7,9,10,<br>12,15,16 | 5  | P63029,P97580,Q5GRG2,Q68G31,Q9JI85                                                                                                                                                                  |
| 951 | 1,2,3,6,8,1<br>1,13,15 | 4,5,7,9,10,<br>12,14,16 | 5  | P02091,Q68G31,Q6IFU7,Q6IFW6,Q9JI85                                                                                                                                                                  |
| 952 | 1,2,3,6,8,1<br>1,13,16 | 4,5,7,9,10,<br>12,14,15 | 10 | P02782,P02783,P05369,P15399,P30120,P63029,P97580,Q5GRG2,Q68G31,Q9JI85                                                                                                                               |
| 953 | 1,2,3,6,8,1<br>1,14,15 | 4,5,7,9,10,<br>12,13,16 | 9  | P02091,P50280,P63029,P97580,Q5GRG2,Q68G31,Q6IFU7,Q6IFW6,Q6IG05                                                                                                                                      |
| 954 | 1,2,3,6,8,1<br>1,14,16 | 4,5,7,9,10,<br>12,13,15 | 7  | P02783,P15399,P50280,P63029,P97580,Q5GRG2,Q9JHB9                                                                                                                                                    |
| 955 | 1,2,3,6,8,1<br>1,15,16 | 4,5,7,9,10,<br>12,13,14 | 10 | P02091,P02783,P15399,P19629,P50280,P97580,Q6IFU7,Q6IFW6,Q6IG05,Q6P6S4                                                                                                                               |
| 956 | 1,2,3,6,8,1<br>2,13,14 | 4,5,7,9,10,<br>11,15,16 | 2  | P97580,Q68G31                                                                                                                                                                                       |
| 957 | 1,2,3,6,8,1<br>2,13,15 | 4,5,7,9,10,<br>11,14,16 | 2  | P02091,Q68G31                                                                                                                                                                                       |
| 958 | 1,2,3,6,8,1<br>2,13,16 | 4,5,7,9,10,<br>11,14,15 | 1  | P97580                                                                                                                                                                                              |
| 959 | 1,2,3,6,8,1<br>2,14,15 | 4,5,7,9,10,<br>11,13,16 | 3  | P00714,P02091,P97580                                                                                                                                                                                |
| 960 | 1,2,3,6,8,1<br>2,14,16 | 4,5,7,9,10,<br>11,13,15 | 2  | P02783,P97580                                                                                                                                                                                       |
| 961 | 1,2,3,6,8,1<br>2,15,16 | 4,5,7,9,10,<br>11,13,14 | 4  | P02091,P02783,P19629,Q6IG05                                                                                                                                                                         |
| 962 | 1,2,3,6,8,1<br>3,14,15 | 4,5,7,9,10,<br>11,12,16 | 4  | P02091,P97580,Q62714,Q68G31                                                                                                                                                                         |
| 963 | 1,2,3,6,8,1<br>3,14,16 | 4,5,7,9,10,<br>11,12,15 | 4  | P02783,P97580,Q62714,Q68G31                                                                                                                                                                         |

|     |                        |                         |                                                                          |
|-----|------------------------|-------------------------|--------------------------------------------------------------------------|
| 964 | 1,2,3,6,8,1<br>3,15,16 | 4,5,7,9,10,<br>11,12,14 | 5 P02091,P15399,P97580,Q62714,Q68G31                                     |
| 965 | 1,2,3,6,8,1<br>4,15,16 | 4,5,7,9,10,<br>11,12,13 | 6 P02091,P02783,P15399,P97580,Q30KJ2,Q62714                              |
| 966 | 1,2,3,6,9,1<br>0,11,12 | 4,5,7,8,13,<br>14,15,16 | 1 Q99MH3                                                                 |
| 967 | 1,2,3,6,9,1<br>0,11,13 | 4,5,7,8,12,<br>14,15,16 | 2 Q68G31,Q99MH3                                                          |
| 968 | 1,2,3,6,9,1<br>0,11,14 | 4,5,7,8,12,<br>13,15,16 | 1 Q99MH3                                                                 |
| 969 | 1,2,3,6,9,1<br>0,11,15 | 4,5,7,8,12,<br>13,14,16 | 3 P02091,Q99MH3,Q9Z2L0                                                   |
| 970 | 1,2,3,6,9,1<br>0,11,16 | 4,5,7,8,12,<br>13,14,15 | 2 D3ZUC6,Q9Z2L0                                                          |
| 971 | 1,2,3,6,9,1<br>0,12,13 | 4,5,7,8,11,<br>14,15,16 | 5 P06760,P0C0A9,Q4G075,Q99041,Q99MH3                                     |
| 972 | 1,2,3,6,9,1<br>0,12,14 | 4,5,7,8,11,<br>13,15,16 | 4 P22273,P30120,Q99041,Q99MH3                                            |
| 973 | 1,2,3,6,9,1<br>0,12,15 | 4,5,7,8,11,<br>13,14,16 | 9 O54728,P02091,P02780,P06760,P22273,P30120,Q4G075,Q99041,Q99MH3         |
| 974 | 1,2,3,6,9,1<br>0,12,16 | 4,5,7,8,11,<br>13,14,15 | 4 D3ZUC6,P06760,Q4G075,Q99041                                            |
| 975 | 1,2,3,6,9,1<br>0,13,14 | 4,5,7,8,11,<br>12,15,16 | 4 O54800;Q5DWW2,P02780,P22273,Q06000                                     |
| 976 | 1,2,3,6,9,1<br>0,13,15 | 4,5,7,8,11,<br>12,14,16 | 7 P02091,P02780,P06760,P22273,Q4G075,Q5M8C6,Q99MH3                       |
| 977 | 1,2,3,6,9,1<br>0,13,16 | 4,5,7,8,11,<br>12,14,15 | 3 D3ZUC6,O54800;Q5DWW2,P06760                                            |
| 978 | 1,2,3,6,9,1<br>0,14,15 | 4,5,7,8,11,<br>12,13,16 | 10 P00714,P01946,P02091,P02780,P22273,P22282,P30120,P97840,Q5M8C6,Q99MH3 |
| 979 | 1,2,3,6,9,1<br>0,14,16 | 4,5,7,8,11,<br>12,13,15 | 3 O54800;Q5DWW2,P22273,Q09030                                            |
| 980 | 1,2,3,6,9,1<br>0,15,16 | 4,5,7,8,11,<br>12,13,14 | 7 D3ZUC6,P02091,P06760,P22273,Q4G075,Q811M5,Q99MH3                       |
| 981 | 1,2,3,6,9,1<br>1,12,13 | 4,5,7,8,10,<br>14,15,16 | 2 O35077,Q99MH3                                                          |
| 982 | 1,2,3,6,9,1<br>1,12,14 | 4,5,7,8,10,<br>13,15,16 | 2 O35077,Q99MH3                                                          |
| 983 | 1,2,3,6,9,1<br>1,12,15 | 4,5,7,8,10,<br>13,14,16 | 3 O35077,P02091,Q99MH3                                                   |

|      |                         |                         |                                                    |
|------|-------------------------|-------------------------|----------------------------------------------------|
| 984  | 1,2,3,6,9,1<br>1,12,16  | 4,5,7,8,10,<br>13,14,15 | 0                                                  |
| 985  | 1,2,3,6,9,1<br>1,13,14  | 4,5,7,8,10,<br>12,15,16 | 1 P0DMW0;P0DMW1                                    |
| 986  | 1,2,3,6,9,1<br>1,13,15  | 4,5,7,8,10,<br>12,14,16 | 3 P02091,P0DMW0;P0DMW1,Q99MH3                      |
| 987  | 1,2,3,6,9,1<br>1,13,16  | 4,5,7,8,10,<br>12,14,15 | 1 D3ZUC6                                           |
| 988  | 1,2,3,6,9,1<br>1,14,15  | 4,5,7,8,10,<br>12,13,16 | 3 P02091,P0DMW0;P0DMW1,Q99MH3                      |
| 989  | 1,2,3,6,9,1<br>1,14,16  | 4,5,7,8,10,<br>12,13,15 | 2 P02783,P0DMW0;P0DMW1                             |
| 990  | 1,2,3,6,9,1<br>1,15,16  | 4,5,7,8,10,<br>12,13,14 | 3 P02091,P02783,Q99MH3                             |
| 991  | 1,2,3,6,9,1<br>2,13,14  | 4,5,7,8,10,<br>11,15,16 | 1 Q09030                                           |
| 992  | 1,2,3,6,9,1<br>2,13,15  | 4,5,7,8,10,<br>11,14,16 | 6 P06760,P22273,Q4G075,Q6B345,Q99041,Q99MH3        |
| 993  | 1,2,3,6,9,1<br>2,13,16  | 4,5,7,8,10,<br>11,14,15 | 3 P06760,Q09030,Q6B345                             |
| 994  | 1,2,3,6,9,1<br>2,14,15  | 4,5,7,8,10,<br>11,13,16 | 7 P00714,P02091,P02780,P22273,P30120,Q99041,Q99MH3 |
| 995  | 1,2,3,6,9,1<br>2,14,16  | 4,5,7,8,10,<br>11,13,15 | 1 Q09030                                           |
| 996  | 1,2,3,6,9,1<br>2,15,16  | 4,5,7,8,10,<br>11,13,14 | 6 P02091,P06760,P22273,Q4G075,Q99041,Q99MH3        |
| 997  | 1,2,3,6,9,1<br>3,14,15  | 4,5,7,8,10,<br>11,12,16 | 4 P02091,P02780,P0DMW0;P0DMW1,P22273               |
| 998  | 1,2,3,6,9,1<br>3,14,16  | 4,5,7,8,10,<br>11,12,15 | 1 Q09030                                           |
| 999  | 1,2,3,6,9,1<br>3,15,16  | 4,5,7,8,10,<br>11,12,14 | 2 P02091,P06760                                    |
| 1000 | 1,2,3,6,9,1<br>4,15,16  | 4,5,7,8,10,<br>11,12,13 | 6 P02091,P02783,P22273,P47967,P97840,Q5I0D1        |
| 1001 | 1,2,3,6,10,<br>11,12,13 | 4,5,7,8,9,1<br>4,15,16  | 2 P20646,Q68G31                                    |
| 1002 | 1,2,3,6,10,<br>11,12,14 | 4,5,7,8,9,1<br>3,15,16  | 0                                                  |
| 1003 | 1,2,3,6,10,<br>11,12,15 | 4,5,7,8,9,1<br>3,14,16  | 2 P02091,Q99MH3                                    |

|      |                                             |                                                                  |
|------|---------------------------------------------|------------------------------------------------------------------|
| 1004 | 1,2,3,6,10, 4,5,7,8,9,1<br>11,12,16 3,14,15 | 0                                                                |
| 1005 | 1,2,3,6,10, 4,5,7,8,9,1<br>11,13,14 2,15,16 | 2 P63029,Q68G31                                                  |
| 1006 | 1,2,3,6,10, 4,5,7,8,9,1<br>11,13,15 2,14,16 | 2 P02091,Q68G31                                                  |
| 1007 | 1,2,3,6,10, 4,5,7,8,9,1<br>11,13,16 2,14,15 | 1 Q68G31                                                         |
| 1008 | 1,2,3,6,10, 4,5,7,8,9,1<br>11,14,15 2,13,16 | 2 P01946,P02091                                                  |
| 1009 | 1,2,3,6,10, 4,5,7,8,9,1<br>11,14,16 2,13,15 | 1 P02783                                                         |
| 1010 | 1,2,3,6,10, 4,5,7,8,9,1<br>11,15,16 2,13,14 | 4 P01946,P02091,P02783,P06760                                    |
| 1011 | 1,2,3,6,10, 4,5,7,8,9,1<br>12,13,14 1,15,16 | 5 O54800;Q5DWV2,P01835,P06760,P14668,P49134                      |
| 1012 | 1,2,3,6,10, 4,5,7,8,9,1<br>12,13,15 1,14,16 | 4 P02091,P06760,P07150,Q812E4                                    |
| 1013 | 1,2,3,6,10, 4,5,7,8,9,1<br>12,13,16 1,14,15 | 3 O54800;Q5DWV2,P06760,P07150                                    |
| 1014 | 1,2,3,6,10, 4,5,7,8,9,1<br>12,14,15 1,13,16 | 8 P00714,P01946,P02091,P02780,P06760,P22273,P30120,P82471        |
| 1015 | 1,2,3,6,10, 4,5,7,8,9,1<br>12,14,16 1,13,15 | 3 O54800;Q5DWV2,P06760,P14668                                    |
| 1016 | 1,2,3,6,10, 4,5,7,8,9,1<br>12,15,16 1,13,14 | 3 P02091,P06760,P82471                                           |
| 1017 | 1,2,3,6,10, 4,5,7,8,9,1<br>13,14,15 1,12,16 | 8 O54800;Q5DWV2,P01835,P01946,P02091,P02780,P06760,P22273,Q68G31 |
| 1018 | 1,2,3,6,10, 4,5,7,8,9,1<br>13,14,16 1,12,15 | 4 O54800;Q5DWV2,P01835,P06760,P14668                             |
| 1019 | 1,2,3,6,10, 4,5,7,8,9,1<br>13,15,16 1,12,14 | 4 P01835,P02091,P06760,P07150                                    |
| 1020 | 1,2,3,6,10, 4,5,7,8,9,1<br>14,15,16 1,12,13 | 7 P01946,P02091,P02783,P06760,P14668,P22273,P82471               |
| 1021 | 1,2,3,6,11, 4,5,7,8,9,1<br>12,13,14 0,15,16 | 2 P20646,Q9Z0V6                                                  |
| 1022 | 1,2,3,6,11, 4,5,7,8,9,1<br>12,13,15 0,14,16 | 1 P20760                                                         |
| 1023 | 1,2,3,6,11, 4,5,7,8,9,1<br>12,13,16 0,14,15 | 2 P05369,P06760                                                  |

|      |                                             |                                                        |
|------|---------------------------------------------|--------------------------------------------------------|
| 1024 | 1,2,3,6,11, 4,5,7,8,9,1<br>12,14,15 0,13,16 | 1 P02091                                               |
| 1025 | 1,2,3,6,11, 4,5,7,8,9,1<br>12,14,16 0,13,15 | 1 P02783                                               |
| 1026 | 1,2,3,6,11, 4,5,7,8,9,1<br>12,15,16 0,13,14 | 3 P02091,P02783,P06760                                 |
| 1027 | 1,2,3,6,11, 4,5,7,8,9,1<br>13,14,15 0,12,16 | 2 P02091,Q68G31                                        |
| 1028 | 1,2,3,6,11, 4,5,7,8,9,1<br>13,14,16 0,12,15 | 1 P02783                                               |
| 1029 | 1,2,3,6,11, 4,5,7,8,9,1<br>13,15,16 0,12,14 | 2 P02091,P06760                                        |
| 1030 | 1,2,3,6,11, 4,5,7,8,9,1<br>14,15,16 0,12,13 | 2 P02091,P02783                                        |
| 1031 | 1,2,3,6,12, 4,5,7,8,9,1<br>13,14,15 0,11,16 | 5 P01835,P06760,P22273,P49134,Q6B345                   |
| 1032 | 1,2,3,6,12, 4,5,7,8,9,1<br>13,14,16 0,11,15 | 6 P01835,P06760,P49134,Q6B345,Q6P6R2,Q9Z0V6            |
| 1033 | 1,2,3,6,12, 4,5,7,8,9,1<br>13,15,16 0,11,14 | 5 P01835,P02091,P06760,P07150,Q6B345                   |
| 1034 | 1,2,3,6,12, 4,5,7,8,9,1<br>14,15,16 0,11,13 | 4 P02091,P02783,P06760,P22273                          |
| 1035 | 1,2,3,6,13, 4,5,7,8,9,1<br>14,15,16 0,11,12 | 6 P01835,P02091,P02783,P06760,P49134,Q62714            |
| 1036 | 1,2,3,7,8,9 4,5,6,12,1<br>,10,11 3,14,15,16 | 4 iRT-Kit_WR_fusion,P20766,P35280,Q6P6S4               |
| 1037 | 1,2,3,7,8,9 4,5,6,11,1<br>,10,12 3,14,15,16 | 3 iRT-Kit_WR_fusion,P20766,Q63598                      |
| 1038 | 1,2,3,7,8,9 4,5,6,11,1<br>,10,13 2,14,15,16 | 1 P20766                                               |
| 1039 | 1,2,3,7,8,9 4,5,6,11,1<br>,10,14 2,13,15,16 | 0                                                      |
| 1040 | 1,2,3,7,8,9 4,5,6,11,1<br>,10,15 2,13,14,16 | 6 iRT-Kit_WR_fusion,P20766,P35280,Q5RK11,Q63598,Q99MH3 |
| 1041 | 1,2,3,7,8,9 4,5,6,11,1<br>,10,16 2,13,14,15 | 3 P20766,Q63598,Q64093                                 |
| 1042 | 1,2,3,7,8,9 4,5,6,10,1<br>,11,12 3,14,15,16 | 3 iRT-Kit_WR_fusion,P35280,P70709                      |
| 1043 | 1,2,3,7,8,9 4,5,6,10,1<br>,11,13 2,14,15,16 | 3 iRT-Kit_WR_fusion,P35280,Q66H69                      |

|      |                        |                          |                                                                          |
|------|------------------------|--------------------------|--------------------------------------------------------------------------|
| 1044 | 1,2,3,7,8,9<br>,11,14  | 4,5,6,10,1<br>2,13,15,16 | 5 iRT-Kit_WR_fusion,P0DMW0;P0DMW1,P35280,Q63751,Q812E4                   |
| 1045 | 1,2,3,7,8,9<br>,11,15  | 4,5,6,10,1<br>2,13,14,16 | 6 iRT-Kit_WR_fusion,P35280,Q6IFW6,Q6IMF3,Q6P6S4,Q99MH3                   |
| 1046 | 1,2,3,7,8,9<br>,11,16  | 4,5,6,10,1<br>2,13,14,15 | 8 iRT-Kit_WR_fusion,P02782,P08723,P09456,P30120,P35280,Q812E4,Q9JHB9     |
| 1047 | 1,2,3,7,8,9<br>,12,13  | 4,5,6,10,1<br>1,14,15,16 | 2 iRT-Kit_WR_fusion,Q66H69                                               |
| 1048 | 1,2,3,7,8,9<br>,12,14  | 4,5,6,10,1<br>1,13,15,16 | 1 iRT-Kit_WR_fusion                                                      |
| 1049 | 1,2,3,7,8,9<br>,12,15  | 4,5,6,10,1<br>1,13,14,16 | 4 iRT-Kit_WR_fusion,P35280,P36376,Q99MH3                                 |
| 1050 | 1,2,3,7,8,9<br>,12,16  | 4,5,6,10,1<br>1,13,14,15 | 1 iRT-Kit_WR_fusion                                                      |
| 1051 | 1,2,3,7,8,9<br>,13,14  | 4,5,6,10,1<br>1,12,15,16 | 1 P0DMW0;P0DMW1                                                          |
| 1052 | 1,2,3,7,8,9<br>,13,15  | 4,5,6,10,1<br>1,12,14,16 | 2 iRT-Kit_WR_fusion,P35280                                               |
| 1053 | 1,2,3,7,8,9<br>,13,16  | 4,5,6,10,1<br>1,12,14,15 | 1 iRT-Kit_WR_fusion                                                      |
| 1054 | 1,2,3,7,8,9<br>,14,15  | 4,5,6,10,1<br>1,12,13,16 | 2 P00714,P35280                                                          |
| 1055 | 1,2,3,7,8,9<br>,14,16  | 4,5,6,10,1<br>1,12,13,15 | 0                                                                        |
| 1056 | 1,2,3,7,8,9<br>,15,16  | 4,5,6,10,1<br>1,12,13,14 | 2 iRT-Kit_WR_fusion,P35280                                               |
| 1057 | 1,2,3,7,8,1<br>0,11,12 | 4,5,6,9,13,<br>14,15,16  | 4 iRT-Kit_WR_fusion,P20766,P47967,Q66H69                                 |
| 1058 | 1,2,3,7,8,1<br>0,11,13 | 4,5,6,9,12,<br>14,15,16  | 2 P20766,Q66H69                                                          |
| 1059 | 1,2,3,7,8,1<br>0,11,14 | 4,5,6,9,12,<br>13,15,16  | 1 Q66H69                                                                 |
| 1060 | 1,2,3,7,8,1<br>0,11,15 | 4,5,6,9,12,<br>13,14,16  | 8 P20766,Q5RKI1,Q64093,Q66H69,Q6IFU7,Q6IFW6,Q6IMF3,Q9WTW7                |
| 1061 | 1,2,3,7,8,1<br>0,11,16 | 4,5,6,9,12,<br>13,14,15  | 10 P02782,P08723,P20766,P30120,Q00715,Q63424,Q64093,Q66H69,Q9JHB9,Q9WTW7 |
| 1062 | 1,2,3,7,8,1<br>0,12,13 | 4,5,6,9,11,<br>14,15,16  | 7 iRT-Kit_WR_fusion,P20766,P47967,Q63598,Q64093,Q66H69,Q923V8            |
| 1063 | 1,2,3,7,8,1<br>0,12,14 | 4,5,6,9,11,<br>13,15,16  | 2 Q5RLM2,Q66H69                                                          |

|      |                        |                         |                                                                                                                                                                                                                                            |
|------|------------------------|-------------------------|--------------------------------------------------------------------------------------------------------------------------------------------------------------------------------------------------------------------------------------------|
| 1064 | 1,2,3,7,8,1<br>0,12,15 | 4,5,6,9,11,<br>13,14,16 | iRT-<br>11 Kit_WR_fusion,O70377,P20766,P34901,Q05175,Q5RKI1,Q63598,Q64093,Q66H69,Q6AY41,Q9W<br>TW7                                                                                                                                         |
| 1065 | 1,2,3,7,8,1<br>0,12,16 | 4,5,6,9,11,<br>13,14,15 | iRT-<br>16 Kit_WR_fusion,P19468,P20766,P46844,P53790,P57113,Q3ZAV1,Q63424,Q63598,Q64093,Q66H<br>69,Q6AY41,Q80W57,Q923V8,Q9JJ40,Q9WTW7                                                                                                      |
| 1066 | 1,2,3,7,8,1<br>0,13,14 | 4,5,6,9,11,<br>12,15,16 | 3 P25809,Q66H69,Q9WUW8                                                                                                                                                                                                                     |
| 1067 | 1,2,3,7,8,1<br>0,13,15 | 4,5,6,9,11,<br>12,14,16 | 17 O70377,O70594,O88339;Q4V882,P19468,P20766,P51907,Q05175,Q5RKI1,Q63424,Q63598,Q6<br>3618,Q64093,Q66H69,Q6AY41,Q6Q0N1,Q80W57,Q9WTW7                                                                                                       |
| 1068 | 1,2,3,7,8,1<br>0,13,16 | 4,5,6,9,11,<br>12,14,15 | 18 O70377,O70594,P19468,P20766,P46844,P53790,P57113,Q3ZAV1,Q63424,Q63598,Q63618,Q64<br>093,Q66H69,Q6AY41,Q80W57,Q9WTW7,Q9WUW8,Q9Z0W7                                                                                                       |
| 1069 | 1,2,3,7,8,1<br>0,14,15 | 4,5,6,9,11,<br>12,13,16 | 8 O70377,O88339;Q4V882,P54921,Q05175,Q5RKI1,Q62714,Q63598,Q64093                                                                                                                                                                           |
| 1070 | 1,2,3,7,8,1<br>0,14,16 | 4,5,6,9,11,<br>12,13,15 | 16 O70377,P19468,P46844,P53790,P57113,P97580,Q05175,Q63424,Q63598,Q64093,Q6AY41,Q80<br>W57,Q923S2,Q9WTW7,Q9WUW8,Q9WUW9                                                                                                                     |
| 1071 | 1,2,3,7,8,1<br>0,15,16 | 4,5,6,9,11,<br>12,13,14 | O70377,O70594,O88339;Q4V882,P19468,P20766,P29975,P38918,P46844,P48508,P51907,P537<br>31 90,P57113,P97608,Q05175,Q3ZAV1,Q5I0E9,Q5RKI1,Q63355,Q63424,Q63598,Q64093,Q6AY41,<br>Q6MG61,Q6Q0N1,Q80W57,Q8R431,Q923S2,Q9JJ40,Q9R1T5,Q9WTW7,Q9Z0W7 |
| 1072 | 1,2,3,7,8,1<br>1,12,13 | 4,5,6,9,10,<br>14,15,16 | 4 iRT-Kit_WR_fusion,P47967,Q66H69,Q811M5                                                                                                                                                                                                   |
| 1073 | 1,2,3,7,8,1<br>1,12,14 | 4,5,6,9,10,<br>13,15,16 | 4 iRT-Kit_WR_fusion,P11883,Q66H69,Q811M5                                                                                                                                                                                                   |
| 1074 | 1,2,3,7,8,1<br>1,12,15 | 4,5,6,9,10,<br>13,14,16 | 5 iRT-Kit_WR_fusion,Q66H69,Q6IFW6,Q6IG05,Q6IMF3                                                                                                                                                                                            |
| 1075 | 1,2,3,7,8,1<br>1,12,16 | 4,5,6,9,10,<br>13,14,15 | 8 iRT-Kit_WR_fusion,P02782,P08723,P30120,Q00715,Q66H69,Q811M5,Q9JHB9                                                                                                                                                                       |
| 1076 | 1,2,3,7,8,1<br>1,13,14 | 4,5,6,9,10,<br>12,15,16 | 2 Q66H69,Q811M5                                                                                                                                                                                                                            |
| 1077 | 1,2,3,7,8,1<br>1,13,15 | 4,5,6,9,10,<br>12,14,16 | 6 iRT-Kit_WR_fusion,Q66H69,Q6IFU7,Q6IFW6,Q6IMF3,Q811M5                                                                                                                                                                                     |
| 1078 | 1,2,3,7,8,1<br>1,13,16 | 4,5,6,9,10,<br>12,14,15 | 10 P02782,P05369,P08723,P09456,P24368,P30120,Q66H69,Q6AYQ8,Q811M5,Q9JHB9                                                                                                                                                                   |
| 1079 | 1,2,3,7,8,1<br>1,14,15 | 4,5,6,9,10,<br>12,13,16 | 5 Q6IFU7,Q6IFU8,Q6IFW6,Q6IMF3,Q811M5                                                                                                                                                                                                       |
| 1080 | 1,2,3,7,8,1<br>1,14,16 | 4,5,6,9,10,<br>12,13,15 | 7 P02782,P08723,P30120,Q00715,Q811M5,Q812E4,Q9JHB9                                                                                                                                                                                         |
| 1081 | 1,2,3,7,8,1<br>1,15,16 | 4,5,6,9,10,<br>12,13,14 | iRT-<br>11 Kit_WR_fusion,P02782,P08723,P30120,Q4FZU2,Q6IFU8,Q6IFW6,Q6IMF3,Q8CJ52,Q9JHB9,Q9W<br>TW7                                                                                                                                         |

|      |                        |                         |                                             |
|------|------------------------|-------------------------|---------------------------------------------|
| 1082 | 1,2,3,7,8,1<br>2,13,14 | 4,5,6,9,10,<br>11,15,16 | 3 iRT-Kit_WR_fusion,Q66H69,Q811M5           |
| 1083 | 1,2,3,7,8,1<br>2,13,15 | 4,5,6,9,10,<br>11,14,16 | 2 iRT-Kit_WR_fusion,Q66H69                  |
| 1084 | 1,2,3,7,8,1<br>2,13,16 | 4,5,6,9,10,<br>11,14,15 | 3 iRT-Kit_WR_fusion,Q66H69,Q811M5           |
| 1085 | 1,2,3,7,8,1<br>2,14,15 | 4,5,6,9,10,<br>11,13,16 | 2 iRT-Kit_WR_fusion,P00714                  |
| 1086 | 1,2,3,7,8,1<br>2,14,16 | 4,5,6,9,10,<br>11,13,15 | 2 iRT-Kit_WR_fusion,Q811M5                  |
| 1087 | 1,2,3,7,8,1<br>2,15,16 | 4,5,6,9,10,<br>11,13,14 | 4 iRT-Kit_WR_fusion,Q63598,Q64093,Q9WTW7    |
| 1088 | 1,2,3,7,8,1<br>3,14,15 | 4,5,6,9,10,<br>11,12,16 | 2 Q62714,Q811M5                             |
| 1089 | 1,2,3,7,8,1<br>3,14,16 | 4,5,6,9,10,<br>11,12,15 | 3 Q62714,Q811M5,Q9WUW8                      |
| 1090 | 1,2,3,7,8,1<br>3,15,16 | 4,5,6,9,10,<br>11,12,14 | 5 P19468,Q62714,Q64093,Q6AYQ8,Q9WTW7        |
| 1091 | 1,2,3,7,8,1<br>4,15,16 | 4,5,6,9,10,<br>11,12,13 | 1 Q62714                                    |
| 1092 | 1,2,3,7,9,1<br>0,11,12 | 4,5,6,8,13,<br>14,15,16 | 1 P20766                                    |
| 1093 | 1,2,3,7,9,1<br>0,11,13 | 4,5,6,8,12,<br>14,15,16 | 1 P20766                                    |
| 1094 | 1,2,3,7,9,1<br>0,11,14 | 4,5,6,8,12,<br>13,15,16 | 0                                           |
| 1095 | 1,2,3,7,9,1<br>0,11,15 | 4,5,6,8,12,<br>13,14,16 | 4 P20766,P35280,Q5RKI1,Q99MH3               |
| 1096 | 1,2,3,7,9,1<br>0,11,16 | 4,5,6,8,12,<br>13,14,15 | 1 P20766                                    |
| 1097 | 1,2,3,7,9,1<br>0,12,13 | 4,5,6,8,11,<br>14,15,16 | 2 Q6AY61,Q99041                             |
| 1098 | 1,2,3,7,9,1<br>0,12,14 | 4,5,6,8,11,<br>13,15,16 | 2 Q6AY61,Q99041                             |
| 1099 | 1,2,3,7,9,1<br>0,12,15 | 4,5,6,8,11,<br>13,14,16 | 6 O54728,P20766,Q5RKI1,Q6AY61,Q99041,Q99MH3 |
| 1100 | 1,2,3,7,9,1<br>0,12,16 | 4,5,6,8,11,<br>13,14,15 | 2 P20766,Q99041                             |
| 1101 | 1,2,3,7,9,1<br>0,13,14 | 4,5,6,8,11,<br>12,15,16 | 0                                           |



|      |                        |                         |                                             |
|------|------------------------|-------------------------|---------------------------------------------|
| 1102 | 1,2,3,7,9,1<br>0,13,15 | 4,5,6,8,11,<br>12,14,16 | 3 P20766,Q5RKI1,Q8CFN2                      |
| 1103 | 1,2,3,7,9,1<br>0,13,16 | 4,5,6,8,11,<br>12,14,15 | 1 P20766                                    |
| 1104 | 1,2,3,7,9,1<br>0,14,15 | 4,5,6,8,11,<br>12,13,16 | 4 P00714,P22273,P30120,Q5RKI1               |
| 1105 | 1,2,3,7,9,1<br>0,14,16 | 4,5,6,8,11,<br>12,13,15 | 0                                           |
| 1106 | 1,2,3,7,9,1<br>0,15,16 | 4,5,6,8,11,<br>12,13,14 | 2 P20766,Q5RKI1                             |
| 1107 | 1,2,3,7,9,1<br>1,12,13 | 4,5,6,8,10,<br>14,15,16 | 2 P54921,Q62761;Q62762;Q62763               |
| 1108 | 1,2,3,7,9,1<br>1,12,14 | 4,5,6,8,10,<br>13,15,16 | 1 P0DMW0;P0DMW1                             |
| 1109 | 1,2,3,7,9,1<br>1,12,15 | 4,5,6,8,10,<br>13,14,16 | 4 P25031,P35280,Q62761;Q62762;Q62763,Q99MH3 |
| 1110 | 1,2,3,7,9,1<br>1,12,16 | 4,5,6,8,10,<br>13,14,15 | 0                                           |
| 1111 | 1,2,3,7,9,1<br>1,13,14 | 4,5,6,8,10,<br>12,15,16 | 3 P0DMW0;P0DMW1,P25031,Q9R168               |
| 1112 | 1,2,3,7,9,1<br>1,13,15 | 4,5,6,8,10,<br>12,14,16 | 3 P0DMW0;P0DMW1,P25031,P35280               |
| 1113 | 1,2,3,7,9,1<br>1,13,16 | 4,5,6,8,10,<br>12,14,15 | 2 P54921,Q9R168                             |
| 1114 | 1,2,3,7,9,1<br>1,14,15 | 4,5,6,8,10,<br>12,13,16 | 3 P0DMW0;P0DMW1,P25031,P35280               |
| 1115 | 1,2,3,7,9,1<br>1,14,16 | 4,5,6,8,10,<br>12,13,15 | 2 P0DMW0;P0DMW1,Q9R168                      |
| 1116 | 1,2,3,7,9,1<br>1,15,16 | 4,5,6,8,10,<br>12,13,14 | 1 P35280                                    |
| 1117 | 1,2,3,7,9,1<br>2,13,14 | 4,5,6,8,10,<br>11,15,16 | 1 Q6AY61                                    |
| 1118 | 1,2,3,7,9,1<br>2,13,15 | 4,5,6,8,10,<br>11,14,16 | 2 Q6AY61,Q99041                             |
| 1119 | 1,2,3,7,9,1<br>2,13,16 | 4,5,6,8,10,<br>11,14,15 | 0                                           |
| 1120 | 1,2,3,7,9,1<br>2,14,15 | 4,5,6,8,10,<br>11,13,16 | 4 P00714,P22273,Q6AY61,Q99041               |
| 1121 | 1,2,3,7,9,1<br>2,14,16 | 4,5,6,8,10,<br>11,13,15 | 0                                           |

|      |                         |                         |                               |
|------|-------------------------|-------------------------|-------------------------------|
| 1122 | 1,2,3,7,9,1<br>2,15,16  | 4,5,6,8,10,<br>11,13,14 | 2 Q6AY61,Q99041               |
| 1123 | 1,2,3,7,9,1<br>3,14,15  | 4,5,6,8,10,<br>11,12,16 | 2 P0DMW0;P0DMW1,P22273        |
| 1124 | 1,2,3,7,9,1<br>3,14,16  | 4,5,6,8,10,<br>11,12,15 | 1 Q9R168                      |
| 1125 | 1,2,3,7,9,1<br>3,15,16  | 4,5,6,8,10,<br>11,12,14 | 0                             |
| 1126 | 1,2,3,7,9,1<br>4,15,16  | 4,5,6,8,10,<br>11,12,13 | 1 P22273                      |
| 1127 | 1,2,3,7,10,<br>11,12,13 | 4,5,6,8,9,1<br>4,15,16  | 3 P20760,P23593,P47967        |
| 1128 | 1,2,3,7,10,<br>11,12,14 | 4,5,6,8,9,1<br>3,15,16  | 0                             |
| 1129 | 1,2,3,7,10,<br>11,12,15 | 4,5,6,8,9,1<br>3,14,16  | 3 P20760,P20766,Q5RKI1        |
| 1130 | 1,2,3,7,10,<br>11,12,16 | 4,5,6,8,9,1<br>3,14,15  | 1 P20766                      |
| 1131 | 1,2,3,7,10,<br>11,13,14 | 4,5,6,8,9,1<br>2,15,16  | 0                             |
| 1132 | 1,2,3,7,10,<br>11,13,15 | 4,5,6,8,9,1<br>2,14,16  | 3 P20760,P20766,Q5RKI1        |
| 1133 | 1,2,3,7,10,<br>11,13,16 | 4,5,6,8,9,1<br>2,14,15  | 2 P20766,Q6AYQ8               |
| 1134 | 1,2,3,7,10,<br>11,14,15 | 4,5,6,8,9,1<br>2,13,16  | 1 Q5RKI1                      |
| 1135 | 1,2,3,7,10,<br>11,14,16 | 4,5,6,8,9,1<br>2,13,15  | 0                             |
| 1136 | 1,2,3,7,10,<br>11,15,16 | 4,5,6,8,9,1<br>2,13,14  | 3 P20766,Q5RKI1,Q9WTW7        |
| 1137 | 1,2,3,7,10,<br>12,13,14 | 4,5,6,8,9,1<br>1,15,16  | 2 P01835,Q6AY61               |
| 1138 | 1,2,3,7,10,<br>12,13,15 | 4,5,6,8,9,1<br>1,14,16  | 3 P20760,Q5RKI1,Q6AY61        |
| 1139 | 1,2,3,7,10,<br>12,13,16 | 4,5,6,8,9,1<br>1,14,15  | 3 P20766,Q64093,Q6AY61        |
| 1140 | 1,2,3,7,10,<br>12,14,15 | 4,5,6,8,9,1<br>1,13,16  | 4 P00714,Q5RKI1,Q6AY61,Q6RUV5 |
| 1141 | 1,2,3,7,10,<br>12,14,16 | 4,5,6,8,9,1<br>1,13,15  | 1 Q6AY61                      |

|      |                                             |                                                                                            |
|------|---------------------------------------------|--------------------------------------------------------------------------------------------|
| 1142 | 1,2,3,7,10, 4,5,6,8,9,1<br>12,15,16 1,13,14 | 7 P18297,P20766,Q5RKI1,Q63598,Q64093,Q6AY61,Q9WTW7                                         |
| 1143 | 1,2,3,7,10, 4,5,6,8,9,1<br>13,14,15 1,12,16 | 3 P01835,P63095,Q5RKI1                                                                     |
| 1144 | 1,2,3,7,10, 4,5,6,8,9,1<br>13,14,16 1,12,15 | 3 P01835,P63095,Q9WUW8                                                                     |
| 1145 | 1,2,3,7,10, 4,5,6,8,9,1<br>13,15,16 1,12,14 | 11 P01835,P18297,P19468,P20766,P61206;P84079,P63095,Q5RKI1,Q63424,Q64093,Q6AYQ8,Q9W<br>TW7 |
| 1146 | 1,2,3,7,10, 4,5,6,8,9,1<br>14,15,16 1,12,13 | 5 P18297,P61206;P84079,P63095,Q5RKI1,Q64093                                                |
| 1147 | 1,2,3,7,11, 4,5,6,8,9,1<br>12,13,14 0,15,16 | 3 P20760,P25031,Q811M5                                                                     |
| 1148 | 1,2,3,7,11, 4,5,6,8,9,1<br>12,13,15 0,14,16 | 2 P20760,P25031                                                                            |
| 1149 | 1,2,3,7,11, 4,5,6,8,9,1<br>12,13,16 0,14,15 | 3 P05369,P47967,Q811M5                                                                     |
| 1150 | 1,2,3,7,11, 4,5,6,8,9,1<br>12,14,15 0,13,16 | 3 P20760,P25031,Q811M5                                                                     |
| 1151 | 1,2,3,7,11, 4,5,6,8,9,1<br>12,14,16 0,13,15 | 1 Q811M5                                                                                   |
| 1152 | 1,2,3,7,11, 4,5,6,8,9,1<br>12,15,16 0,13,14 | 0                                                                                          |
| 1153 | 1,2,3,7,11, 4,5,6,8,9,1<br>13,14,15 0,12,16 | 2 P25031,Q811M5                                                                            |
| 1154 | 1,2,3,7,11, 4,5,6,8,9,1<br>13,14,16 0,12,15 | 1 Q811M5                                                                                   |
| 1155 | 1,2,3,7,11, 4,5,6,8,9,1<br>13,15,16 0,12,14 | 2 P25031,Q6AYQ8                                                                            |
| 1156 | 1,2,3,7,11, 4,5,6,8,9,1<br>14,15,16 0,12,13 | 1 P25031                                                                                   |
| 1157 | 1,2,3,7,12, 4,5,6,8,9,1<br>13,14,15 0,11,16 | 2 P01835,Q6AY61                                                                            |
| 1158 | 1,2,3,7,12, 4,5,6,8,9,1<br>13,14,16 0,11,15 | 3 P01835,Q6AY61,Q811M5                                                                     |
| 1159 | 1,2,3,7,12, 4,5,6,8,9,1<br>13,15,16 0,11,14 | 2 P01835,Q6AY61                                                                            |
| 1160 | 1,2,3,7,12, 4,5,6,8,9,1<br>14,15,16 0,11,13 | 1 Q6AY61                                                                                   |
| 1161 | 1,2,3,7,13, 4,5,6,8,9,1<br>14,15,16 0,11,12 | 2 P01835,Q62714                                                                            |

|      |                        |                         |                                             |
|------|------------------------|-------------------------|---------------------------------------------|
| 1162 | 1,2,3,8,9,1<br>0,11,12 | 4,5,6,7,13,<br>14,15,16 | 1 Q99MH3                                    |
| 1163 | 1,2,3,8,9,1<br>0,11,13 | 4,5,6,7,12,<br>14,15,16 | 0                                           |
| 1164 | 1,2,3,8,9,1<br>0,11,14 | 4,5,6,7,12,<br>13,15,16 | 0                                           |
| 1165 | 1,2,3,8,9,1<br>0,11,15 | 4,5,6,7,12,<br>13,14,16 | 3 Q6IFW6,Q6P6S4,Q99MH3                      |
| 1166 | 1,2,3,8,9,1<br>0,11,16 | 4,5,6,7,12,<br>13,14,15 | 1 O88797                                    |
| 1167 | 1,2,3,8,9,1<br>0,12,13 | 4,5,6,7,11,<br>14,15,16 | 1 Q99041                                    |
| 1168 | 1,2,3,8,9,1<br>0,12,14 | 4,5,6,7,11,<br>13,15,16 | 4 P00714,P11598,Q99041,Q9Z0J6               |
| 1169 | 1,2,3,8,9,1<br>0,12,15 | 4,5,6,7,11,<br>13,14,16 | 6 P00714,P11598,P34901,P36376,Q99041,Q99MH3 |
| 1170 | 1,2,3,8,9,1<br>0,12,16 | 4,5,6,7,11,<br>13,14,15 | 1 Q99041                                    |
| 1171 | 1,2,3,8,9,1<br>0,13,14 | 4,5,6,7,11,<br>12,15,16 | 0                                           |
| 1172 | 1,2,3,8,9,1<br>0,13,15 | 4,5,6,7,11,<br>12,14,16 | 4 P11598,Q99041,Q99376,Q99MH3               |
| 1173 | 1,2,3,8,9,1<br>0,13,16 | 4,5,6,7,11,<br>12,14,15 | 0                                           |
| 1174 | 1,2,3,8,9,1<br>0,14,15 | 4,5,6,7,11,<br>12,13,16 | 5 P00714,P11598,P97840,Q99041,Q99MH3        |
| 1175 | 1,2,3,8,9,1<br>0,14,16 | 4,5,6,7,11,<br>12,13,15 | 0                                           |
| 1176 | 1,2,3,8,9,1<br>0,15,16 | 4,5,6,7,11,<br>12,13,14 | 1 Q99041                                    |
| 1177 | 1,2,3,8,9,1<br>1,12,13 | 4,5,6,7,10,<br>14,15,16 | 1 Q64335                                    |
| 1178 | 1,2,3,8,9,1<br>1,12,14 | 4,5,6,7,10,<br>13,15,16 | 1 P11883                                    |
| 1179 | 1,2,3,8,9,1<br>1,12,15 | 4,5,6,7,10,<br>13,14,16 | 4 P36376,Q6IFW6,Q6P6S4,Q99MH3               |
| 1180 | 1,2,3,8,9,1<br>1,12,16 | 4,5,6,7,10,<br>13,14,15 | 1 O88797                                    |
| 1181 | 1,2,3,8,9,1<br>1,13,14 | 4,5,6,7,10,<br>12,15,16 | 2 P0DMW0;P0DMW1,Q64335                      |

|      |                         |                         |   |                                           |
|------|-------------------------|-------------------------|---|-------------------------------------------|
| 1182 | 1,2,3,8,9,1<br>1,13,15  | 4,5,6,7,10,<br>12,14,16 | 2 | P0DMW0;P0DMW1,Q99MH3                      |
| 1183 | 1,2,3,8,9,1<br>1,13,16  | 4,5,6,7,10,<br>12,14,15 | 0 |                                           |
| 1184 | 1,2,3,8,9,1<br>1,14,15  | 4,5,6,7,10,<br>12,13,16 | 2 | P0DMW0;P0DMW1,Q99MH3                      |
| 1185 | 1,2,3,8,9,1<br>1,14,16  | 4,5,6,7,10,<br>12,13,15 | 2 | O88797,Q812E4                             |
| 1186 | 1,2,3,8,9,1<br>1,15,16  | 4,5,6,7,10,<br>12,13,14 | 2 | Q6IFW6,Q6P6S4                             |
| 1187 | 1,2,3,8,9,1<br>2,13,14  | 4,5,6,7,10,<br>11,15,16 | 1 | P17988                                    |
| 1188 | 1,2,3,8,9,1<br>2,13,15  | 4,5,6,7,10,<br>11,14,16 | 4 | P11598,P36376,Q99041,Q99MH3               |
| 1189 | 1,2,3,8,9,1<br>2,13,16  | 4,5,6,7,10,<br>11,14,15 | 1 | Q99041                                    |
| 1190 | 1,2,3,8,9,1<br>2,14,15  | 4,5,6,7,10,<br>11,13,16 | 6 | P00714,P11598,P36376,Q99041,Q99MH3,Q9Z0J6 |
| 1191 | 1,2,3,8,9,1<br>2,14,16  | 4,5,6,7,10,<br>11,13,15 | 0 |                                           |
| 1192 | 1,2,3,8,9,1<br>2,15,16  | 4,5,6,7,10,<br>11,13,14 | 2 | P36376,Q99041                             |
| 1193 | 1,2,3,8,9,1<br>3,14,15  | 4,5,6,7,10,<br>11,12,16 | 3 | P00714,P0DMW0;P0DMW1,P11598               |
| 1194 | 1,2,3,8,9,1<br>3,14,16  | 4,5,6,7,10,<br>11,12,15 | 0 |                                           |
| 1195 | 1,2,3,8,9,1<br>3,15,16  | 4,5,6,7,10,<br>11,12,14 | 0 |                                           |
| 1196 | 1,2,3,8,9,1<br>4,15,16  | 4,5,6,7,10,<br>11,12,13 | 5 | P00714,P23593,P47967,P97840,Q5I0D1        |
| 1197 | 1,2,3,8,10,<br>11,12,13 | 4,5,6,7,9,1<br>4,15,16  | 0 |                                           |
| 1198 | 1,2,3,8,10,<br>11,12,14 | 4,5,6,7,9,1<br>3,15,16  | 2 | P11883,Q9Z0J6                             |
| 1199 | 1,2,3,8,10,<br>11,12,15 | 4,5,6,7,9,1<br>3,14,16  | 3 | Q6IFU7,Q6IFW6,Q99MH3                      |
| 1200 | 1,2,3,8,10,<br>11,12,16 | 4,5,6,7,9,1<br>3,14,15  | 0 |                                           |
| 1201 | 1,2,3,8,10,<br>11,13,14 | 4,5,6,7,9,1<br>2,15,16  | 1 | Q68G31                                    |

|      |                                             |                                             |
|------|---------------------------------------------|---------------------------------------------|
| 1202 | 1,2,3,8,10, 4,5,6,7,9,1<br>11,13,15 2,14,16 | 3 Q68G31,Q6IFU7,Q6IFW6                      |
| 1203 | 1,2,3,8,10, 4,5,6,7,9,1<br>11,13,16 2,14,15 | 0                                           |
| 1204 | 1,2,3,8,10, 4,5,6,7,9,1<br>11,14,15 2,13,16 | 2 Q6IFU7,Q6IFW6                             |
| 1205 | 1,2,3,8,10, 4,5,6,7,9,1<br>11,14,16 2,13,15 | 1 P97580                                    |
| 1206 | 1,2,3,8,10, 4,5,6,7,9,1<br>11,15,16 2,13,14 | 2 Q6IFU7,Q6IFW6                             |
| 1207 | 1,2,3,8,10, 4,5,6,7,9,1<br>12,13,14 1,15,16 | 1 Q9Z0J6                                    |
| 1208 | 1,2,3,8,10, 4,5,6,7,9,1<br>12,13,15 1,14,16 | 1 Q99376                                    |
| 1209 | 1,2,3,8,10, 4,5,6,7,9,1<br>12,13,16 1,14,15 | 0                                           |
| 1210 | 1,2,3,8,10, 4,5,6,7,9,1<br>12,14,15 1,13,16 | 3 P00714,Q63617,Q9Z0J6                      |
| 1211 | 1,2,3,8,10, 4,5,6,7,9,1<br>12,14,16 1,13,15 | 0                                           |
| 1212 | 1,2,3,8,10, 4,5,6,7,9,1<br>12,15,16 1,13,14 | 2 Q63598,Q99041                             |
| 1213 | 1,2,3,8,10, 4,5,6,7,9,1<br>13,14,15 1,12,16 | 0                                           |
| 1214 | 1,2,3,8,10, 4,5,6,7,9,1<br>13,14,16 1,12,15 | 1 P97580                                    |
| 1215 | 1,2,3,8,10, 4,5,6,7,9,1<br>13,15,16 1,12,14 | 1 Q64093                                    |
| 1216 | 1,2,3,8,10, 4,5,6,7,9,1<br>14,15,16 1,12,13 | 2 P97580,Q63617                             |
| 1217 | 1,2,3,8,11, 4,5,6,7,9,1<br>12,13,14 0,15,16 | 2 Q64335,Q811M5                             |
| 1218 | 1,2,3,8,11, 4,5,6,7,9,1<br>12,13,15 0,14,16 | 3 Q6IFU7,Q6IFW6,Q6IG05                      |
| 1219 | 1,2,3,8,11, 4,5,6,7,9,1<br>12,13,16 0,14,15 | 2 P30120,Q811M5                             |
| 1220 | 1,2,3,8,11, 4,5,6,7,9,1<br>12,14,15 0,13,16 | 6 P11883,Q6IFU7,Q6IFW6,Q6IG05,Q811M5,Q9Z0J6 |
| 1221 | 1,2,3,8,11, 4,5,6,7,9,1<br>12,14,16 0,13,15 | 1 Q811M5                                    |

|      |                                             |                                                    |
|------|---------------------------------------------|----------------------------------------------------|
| 1222 | 1,2,3,8,11, 4,5,6,7,9,1<br>12,15,16 0,13,14 | 3 Q6IFU7,Q6IFW6,Q6IG05                             |
| 1223 | 1,2,3,8,11, 4,5,6,7,9,1<br>13,14,15 0,12,16 | 3 Q6IFU7,Q6IFW6,Q811M5                             |
| 1224 | 1,2,3,8,11, 4,5,6,7,9,1<br>13,14,16 0,12,15 | 2 P30120,Q811M5                                    |
| 1225 | 1,2,3,8,11, 4,5,6,7,9,1<br>13,15,16 0,12,14 | 2 Q6IFU7,Q6IFW6                                    |
| 1226 | 1,2,3,8,11, 4,5,6,7,9,1<br>14,15,16 0,12,13 | 2 Q6IFU7,Q6IFW6                                    |
| 1227 | 1,2,3,8,12, 4,5,6,7,9,1<br>13,14,15 0,11,16 | 2 P00714,Q9Z0J6                                    |
| 1228 | 1,2,3,8,12, 4,5,6,7,9,1<br>13,14,16 0,11,15 | 1 Q811M5                                           |
| 1229 | 1,2,3,8,12, 4,5,6,7,9,1<br>13,15,16 0,11,14 | 0                                                  |
| 1230 | 1,2,3,8,12, 4,5,6,7,9,1<br>14,15,16 0,11,13 | 0                                                  |
| 1231 | 1,2,3,8,13, 4,5,6,7,9,1<br>14,15,16 0,11,12 | 0                                                  |
| 1232 | 1,2,3,9,10, 4,5,6,7,8,1<br>11,12,13 4,15,16 | 3 P20760,Q62761;Q62762;Q62763,Q99MH3               |
| 1233 | 1,2,3,9,10, 4,5,6,7,8,1<br>11,12,14 3,15,16 | 1 Q9Z0J6                                           |
| 1234 | 1,2,3,9,10, 4,5,6,7,8,1<br>11,12,15 3,14,16 | 5 P06761,P20760,Q62761;Q62762;Q62763,Q99MH3,Q9Z2L0 |
| 1235 | 1,2,3,9,10, 4,5,6,7,8,1<br>11,12,16 3,14,15 | 2 P07171,Q9Z2L0                                    |
| 1236 | 1,2,3,9,10, 4,5,6,7,8,1<br>11,13,14 2,15,16 | 1 P0DMW0;P0DMW1                                    |
| 1237 | 1,2,3,9,10, 4,5,6,7,8,1<br>11,13,15 2,14,16 | 3 P06761,P20760,Q99MH3                             |
| 1238 | 1,2,3,9,10, 4,5,6,7,8,1<br>11,13,16 2,14,15 | 1 D3ZUC6                                           |
| 1239 | 1,2,3,9,10, 4,5,6,7,8,1<br>11,14,15 2,13,16 | 2 P06761,Q99MH3                                    |
| 1240 | 1,2,3,9,10, 4,5,6,7,8,1<br>11,14,16 2,13,15 | 0                                                  |
| 1241 | 1,2,3,9,10, 4,5,6,7,8,1<br>11,15,16 2,13,14 | 3 P07171,Q99MH3,Q9Z2L0                             |

|      |                                             |                                                                                                                                                                                |                                                                                                                                                                                       |
|------|---------------------------------------------|--------------------------------------------------------------------------------------------------------------------------------------------------------------------------------|---------------------------------------------------------------------------------------------------------------------------------------------------------------------------------------|
| 1242 | 1,2,3,9,10, 4,5,6,7,8,1<br>12,13,14 1,15,16 | 23                                                                                                                                                                             | P02780,P02781,P02782,P06760,P06761,P07150,P07647,P08723,P09456,P0C0A9,P11598,P22273,P22282,P22283,P36374,P46462,Q4G063,Q4G075,Q5M8C6,Q63617,Q8CJ52,Q99041,Q9Z0J6                      |
| 1243 | 1,2,3,9,10, 4,5,6,7,8,1<br>12,13,15 1,14,16 | 26                                                                                                                                                                             | P02780,P02781,P02782,P04905,P06760,P06761,P07150,P07647,P08723,P09456,P0C0A9,P11598,P20760,P22273,P22282,P22283,P30120,P46462,Q4G075,Q5M8C6,Q63617,Q8CFN2,Q99041,Q99376,Q99MH3,Q9R0T3 |
| 1244 | 1,2,3,9,10, 4,5,6,7,8,1<br>12,13,16 1,14,15 | 9                                                                                                                                                                              | P02780,P06760,P06761,P07150,P11598,P22273,P22282,Q4G075,Q99041                                                                                                                        |
| 1245 | 1,2,3,9,10, 4,5,6,7,8,1<br>12,14,15 1,13,16 | P00714,P02780,P02781,P02782,P06760,P06761,P07647,P08723,P09456,P0C0A9,P11598,P22273,P22282,P22283,P30120,P36374,P46462,Q4G075,Q5M8C6,Q62902,Q63617,Q99041,Q99MH3,Q9R0T3,Q9Z0J6 | 25                                                                                                                                                                                    |
| 1246 | 1,2,3,9,10, 4,5,6,7,8,1<br>12,14,16 1,13,15 | 11                                                                                                                                                                             | P02780,P06760,P06761,P11598,P22273,P22282,P22283,P46462,Q4G075,Q63617,Q99041                                                                                                          |
| 1247 | 1,2,3,9,10, 4,5,6,7,8,1<br>12,15,16 1,13,14 | 14                                                                                                                                                                             | P02780,P06760,P06761,P07150,P11598,P22273,P22282,P22283,P46462,Q4G075,Q5M8C6,Q63617,Q99041,Q99MH3                                                                                     |
| 1248 | 1,2,3,9,10, 4,5,6,7,8,1<br>13,14,15 1,12,16 | P00714,P02780,P02781,P02782,P04905,P06760,P06761,P07150,P07647,P08723,P09456,P0C0A9,P11598,P22273,P22282,P22283,P30120,P36374,P46462,Q4G075,Q5M8C6,Q63617,Q8CFN2,Q99041,Q9R0T3 | 25                                                                                                                                                                                    |
| 1249 | 1,2,3,9,10, 4,5,6,7,8,1<br>13,14,16 1,12,15 | 13                                                                                                                                                                             | P02780,P06760,P06761,P07150,P11598,P22273,P22282,P36374,P46462,Q4G075,Q5M8C6,Q63617,Q99041                                                                                            |
| 1250 | 1,2,3,9,10, 4,5,6,7,8,1<br>13,15,16 1,12,14 | 15                                                                                                                                                                             | P02780,P06760,P06761,P07150,P11598,P12020,P19218,P22273,P22282,P46462,Q4G075,Q5M8C6,Q63617,Q99041,Q9R0T3                                                                              |
| 1251 | 1,2,3,9,10, 4,5,6,7,8,1<br>14,15,16 1,12,13 | 17                                                                                                                                                                             | P00714,P02780,P06760,P06761,P11598,P22273,P22282,P22283,P36374,P46462,P47967,Q4G075,Q5I0D1,Q5M8C6,Q63617,Q99041,Q9R0T3                                                                |
| 1252 | 1,2,3,9,11, 4,5,6,7,8,1<br>12,13,14 0,15,16 | 13                                                                                                                                                                             | O35077,O70594,O88267,P0DMW0,P0DMW1,P20760,P25031,P53790,Q03248,Q4QQT4,Q62761,Q62762,Q62763,Q63270,Q64335,Q8R431                                                                       |
| 1253 | 1,2,3,9,11, 4,5,6,7,8,1<br>12,13,15 0,14,16 | 6                                                                                                                                                                              | P06761,P20760,P25031,P57113,Q62761;Q62762;Q62763,Q99MH3                                                                                                                               |
| 1254 | 1,2,3,9,11, 4,5,6,7,8,1<br>12,13,16 0,14,15 | 1                                                                                                                                                                              | P54921                                                                                                                                                                                |
| 1255 | 1,2,3,9,11, 4,5,6,7,8,1<br>12,14,15 0,13,16 | 8                                                                                                                                                                              | O70257,P00714,P06761,P0DMW0;P0DMW1,P20760,P25031,Q62761;Q62762;Q62763,Q99MH3                                                                                                          |
| 1256 | 1,2,3,9,11, 4,5,6,7,8,1<br>12,14,16 0,13,15 | 3                                                                                                                                                                              | P07171,P36860,Q63618                                                                                                                                                                  |
| 1257 | 1,2,3,9,11, 4,5,6,7,8,1<br>12,15,16 0,13,14 | 2                                                                                                                                                                              | P07171,P25031                                                                                                                                                                         |
| 1258 | 1,2,3,9,11, 4,5,6,7,8,1<br>13,14,15 0,12,16 | 4                                                                                                                                                                              | O88267,P06761,P0DMW0;P0DMW1,P25031                                                                                                                                                    |
| 1259 | 1,2,3,9,11, 4,5,6,7,8,1<br>13,14,16 0,12,15 | 3                                                                                                                                                                              | O88267,P0DMW0;P0DMW1,P25031                                                                                                                                                           |
| 1260 | 1,2,3,9,11, 4,5,6,7,8,1<br>13,15,16 0,12,14 | 2                                                                                                                                                                              | P25031,Q5RLM2                                                                                                                                                                         |



|      |                                             |                                                                                                                                                                                                  |
|------|---------------------------------------------|--------------------------------------------------------------------------------------------------------------------------------------------------------------------------------------------------|
| 1261 | 1,2,3,9,11, 4,5,6,7,8,1<br>14,15,16 0,12,13 | 3 P07171,P0DMW0;P0DMW1,P25031                                                                                                                                                                    |
| 1262 | 1,2,3,9,12, 4,5,6,7,8,1<br>13,14,15 0,11,16 | P00714,P02780,P02781,P02782,P04905,P06760,P06761,P07150,P07647,P08723,P09456,P0C0A<br>26 9,P11598,P22273,P22282,P22283,P25031,P30120,P46462,Q4G075,Q5M8C6,Q63617,Q6B345,Q<br>99041,Q9R0T3,Q9Z0J6 |
| 1263 | 1,2,3,9,12, 4,5,6,7,8,1<br>13,14,16 0,11,15 | 11 P02780,P06760,P06761,P07150,P11598,P22273,P22282,Q4G075,Q63617,Q6B345,Q99041                                                                                                                  |
| 1264 | 1,2,3,9,12, 4,5,6,7,8,1<br>13,15,16 0,11,14 | 13 P02780,P06760,P06761,P07150,P11598,P22273,P22282,Q4G075,Q5M8C6,Q63617,Q6B345,Q99<br>041,Q9R0T3                                                                                                |
| 1265 | 1,2,3,9,12, 4,5,6,7,8,1<br>14,15,16 0,11,13 | 16 P00714,P02780,P06760,P06761,P07171,P11598,P22273,P22282,P22283,P46462,Q4G075,Q5M8<br>C6,Q63617,Q6B345,Q99041,Q9R0T3                                                                           |
| 1266 | 1,2,3,9,13, 4,5,6,7,8,1<br>14,15,16 0,11,12 | 14 P02780,P06760,P06761,P07150,P0DMW0;P0DMW1,P11598,P22273,P22282,P46462,Q5I0D1,Q5<br>M8C6,Q63617,Q99041,Q9R0T3                                                                                  |
| 1267 | 1,2,3,10,1 4,5,6,7,8,9<br>1,12,13,14 ,15,16 | 3 P20760,Q9Z0J6,Q9Z0V6                                                                                                                                                                           |
| 1268 | 1,2,3,10,1 4,5,6,7,8,9<br>1,12,13,15 ,14,16 | 2 P06760,P20760                                                                                                                                                                                  |
| 1269 | 1,2,3,10,1 4,5,6,7,8,9<br>1,12,13,16 ,14,15 | 2 P06760,P20760                                                                                                                                                                                  |
| 1270 | 1,2,3,10,1 4,5,6,7,8,9<br>1,12,14,15 ,13,16 | 4 P06760,P06761,P20760,Q9Z0J6                                                                                                                                                                    |
| 1271 | 1,2,3,10,1 4,5,6,7,8,9<br>1,12,14,16 ,13,15 | 1 P06760                                                                                                                                                                                         |
| 1272 | 1,2,3,10,1 4,5,6,7,8,9<br>1,12,15,16 ,13,14 | 3 P06760,P20760,Q5QE79                                                                                                                                                                           |
| 1273 | 1,2,3,10,1 4,5,6,7,8,9<br>1,13,14,15 ,12,16 | 1 P20760                                                                                                                                                                                         |
| 1274 | 1,2,3,10,1 4,5,6,7,8,9<br>1,13,14,16 ,12,15 | 1 P06760                                                                                                                                                                                         |
| 1275 | 1,2,3,10,1 4,5,6,7,8,9<br>1,13,15,16 ,12,14 | 3 P06760,P20760,Q5QE79                                                                                                                                                                           |
| 1276 | 1,2,3,10,1 4,5,6,7,8,9<br>1,14,15,16 ,12,13 | 1 P06760                                                                                                                                                                                         |
| 1277 | 1,2,3,10,1 4,5,6,7,8,9<br>2,13,14,15 ,11,16 | P00714,P02780,P02781,P02782,P04905,P06760,P06761,P07150,P07647,P08723,P09456,P0C0A<br>25 9,P11598,P20760,P22273,P22282,P22283,P46462,Q4G075,Q5M8C6,Q63617,Q812E4,Q99041,Q<br>9R0T3,Q9Z0J6        |
| 1278 | 1,2,3,10,1 4,5,6,7,8,9<br>2,13,14,16 ,11,15 | 11 P02780,P06760,P06761,P07150,P22273,P22282,Q63617,Q6P6R2,Q99041,Q9QX74,Q9Z0V6                                                                                                                  |
| 1279 | 1,2,3,10,1 4,5,6,7,8,9<br>2,13,15,16 ,11,14 | 16 P02780,P06760,P06761,P07150,P20760,P22273,P22282,P46462,Q4G075,Q5M8C6,Q5QE79,Q63<br>617,Q6B345,Q6P6R2,Q812E4,Q99041                                                                           |

|      |                          |                                |     |                                                                                                                                                                                                                                                                                                                                                                                                                                                                                                                                                                                                                                                                                                                                                                                                                                                                                                                                                                                                                                                                                                                                                                                                                                                                                                                                                                                                                                                                                                                                                                                                                          |
|------|--------------------------|--------------------------------|-----|--------------------------------------------------------------------------------------------------------------------------------------------------------------------------------------------------------------------------------------------------------------------------------------------------------------------------------------------------------------------------------------------------------------------------------------------------------------------------------------------------------------------------------------------------------------------------------------------------------------------------------------------------------------------------------------------------------------------------------------------------------------------------------------------------------------------------------------------------------------------------------------------------------------------------------------------------------------------------------------------------------------------------------------------------------------------------------------------------------------------------------------------------------------------------------------------------------------------------------------------------------------------------------------------------------------------------------------------------------------------------------------------------------------------------------------------------------------------------------------------------------------------------------------------------------------------------------------------------------------------------|
| 1280 | 1,2,3,10,1<br>2,14,15,16 | 4,5,6,7,8,9<br>,11,13          | 15  | P02780,P06760,P06761,P07150,P11598,P22273,P22282,P46462,P82471,Q4G075,Q5M8C6,Q63617,Q99041,Q9R0T3,Q9Z0J6                                                                                                                                                                                                                                                                                                                                                                                                                                                                                                                                                                                                                                                                                                                                                                                                                                                                                                                                                                                                                                                                                                                                                                                                                                                                                                                                                                                                                                                                                                                 |
| 1281 | 1,2,3,10,1<br>3,14,15,16 | 4,5,6,7,8,9<br>,11,12          | 11  | P02780,P06760,P06761,P07150,P22273,P22282,P46462,P63095,Q5M8C6,Q63617,Q9R0T3                                                                                                                                                                                                                                                                                                                                                                                                                                                                                                                                                                                                                                                                                                                                                                                                                                                                                                                                                                                                                                                                                                                                                                                                                                                                                                                                                                                                                                                                                                                                             |
| 1282 | 1,2,3,11,1<br>2,13,14,15 | 4,5,6,7,8,9<br>,10,16          | 6   | P06760,P20760,P25031,P70545,Q811M5,Q9Z0J6                                                                                                                                                                                                                                                                                                                                                                                                                                                                                                                                                                                                                                                                                                                                                                                                                                                                                                                                                                                                                                                                                                                                                                                                                                                                                                                                                                                                                                                                                                                                                                                |
| 1283 | 1,2,3,11,1<br>2,13,14,16 | 4,5,6,7,8,9<br>,10,15          | 6   | P06760,P20760,P25031,Q6P6R2,Q811M5,Q9Z0V6                                                                                                                                                                                                                                                                                                                                                                                                                                                                                                                                                                                                                                                                                                                                                                                                                                                                                                                                                                                                                                                                                                                                                                                                                                                                                                                                                                                                                                                                                                                                                                                |
| 1284 | 1,2,3,11,1<br>2,13,15,16 | 4,5,6,7,8,9<br>,10,14          | 5   | P06760,P20760,P25031,Q5QE79,Q6P6R2                                                                                                                                                                                                                                                                                                                                                                                                                                                                                                                                                                                                                                                                                                                                                                                                                                                                                                                                                                                                                                                                                                                                                                                                                                                                                                                                                                                                                                                                                                                                                                                       |
| 1285 | 1,2,3,11,1<br>2,14,15,16 | 4,5,6,7,8,9<br>,10,13          | 4   | P06760,P07171,P20760,P25031                                                                                                                                                                                                                                                                                                                                                                                                                                                                                                                                                                                                                                                                                                                                                                                                                                                                                                                                                                                                                                                                                                                                                                                                                                                                                                                                                                                                                                                                                                                                                                                              |
| 1286 | 1,2,3,11,1<br>3,14,15,16 | 4,5,6,7,8,9<br>,10,12          | 3   | P06760,P20760,P25031                                                                                                                                                                                                                                                                                                                                                                                                                                                                                                                                                                                                                                                                                                                                                                                                                                                                                                                                                                                                                                                                                                                                                                                                                                                                                                                                                                                                                                                                                                                                                                                                     |
| 1287 | 1,2,3,12,1<br>3,14,15,16 | 4,5,6,7,8,9<br>,10,11          | 16  | P02780,P06760,P06761,P07150,P20760,P22273,P22282,P49134,P50116,P70545,Q63617,Q6B345,Q6P6R2,Q99041,Q9QX74,Q9R0T3<br>B1H234,D3ZHA0,D4A5U3,iRT-<br>Kit_WR_fusion,O55004,O70594,P02454,P02631,P06760,P06761,P06911,P13432,P18418,P19223,                                                                                                                                                                                                                                                                                                                                                                                                                                                                                                                                                                                                                                                                                                                                                                                                                                                                                                                                                                                                                                                                                                                                                                                                                                                                                                                                                                                     |
| 1288 | 1,2,4,5,6,7<br>,8,9      | 3,10,11,12<br>,13,14,15,<br>16 | 46  | P19629,P20646,P20760,P20761,P20762,P23928,P31430,P36860,P50115,P50116,P50280,P52590,P55091,P70545,P80299,P98089,Q4G075,Q5GRG2,Q5QE79,Q62635,Q62946,Q63618,Q6PCU2,Q6TMA8,Q78P75,Q8CIZ5,Q9JI85,Q9QX74,Q9R0T3,Q9Z0J6,Q9Z0V6,Q9Z1F2<br>A2RUW1,B1H234,D3ZHA0,D4A5U3,O08557,O35763,O55004,O70257,O70377,O70594,O88267,O88339,Q4V882,P01836,P02454,P02631,P04904,P05371,P06760,P06761,P06911,P10247,P13432,P15399,P18418,P18757,P19112,P19223,P19468,P19629,P19814,P20646,P20760,P20761,P20762,P23928,P24268,P25031,P30904,P31044,P31430,P35952,P36860,P38438,P38918,P46844,P48037,P48508,P50115,P50116,P50280,P51907,P52590,P53790,P54921,P55091,P57113,P80299,P97580,P98089,Q03248,Q05175,Q30KJ2,Q3ZAV1,Q4G075,Q5GRG2,Q5I0E9,Q5M7T9,Q5RLM2,Q62635,Q63270,Q63424,Q63598,Q63618,Q64602,Q66H69,Q66HG3,Q68FT5,Q6AYS7,Q6MG61,Q6PCU2,Q6Q0N1,Q6TMA8,Q71MB6,Q80W57,Q8CIZ5,Q8K3P7,Q8R431,Q91ZS3,Q920G2,Q923S2,Q99MA2,Q9JI85,Q9JJ19,Q9JJ40,Q9JLJ3,Q9QX74,Q9QYU4,Q9R0T3,Q9WTT6,Q9WUW8,Q9WUW9,Q9Z0V6,Q9Z0W7,Q9Z1F2<br>B1H234,D3ZHA0,D4A5U3,iRT-<br>Kit_WR_fusion,O08557,O35547,O55004,O88917,P01039,P02631,P02780,P02781,P02782,P04905,P05371,P06760,P06761,P06911,P07150,P07647,P08649,P08723,P09456,P0C0A9,P11598,P12020,P13432,P18418,P19223,P19629,P20646,P20673,P20760,P20762,P22273,P22282,P22283,P31044,P31430,P35952,P36374,P36860,P40241,P46462,P50115,P50116,P50280,P52590,P55091,P80299,P98089,Q09326,Q10758,Q3T1J1,Q4FZU2,Q4G063,Q4G075,Q4KLZ6,Q5GRG2,Q5M8C6,Q62635,Q62946,Q63493,Q63617,Q66H69,Q6AYR9,Q6B345,Q6IFU8,Q6IMF3,Q6P6Q2,Q6TMA8,Q78P75,Q8CIZ5,Q8R5M3,Q99041,Q9JHB9,Q9JI85,Q9QX74,Q9QZK8,Q9R0T3,Q9WTT6,Q9Z0J6,Q9Z0V6 |
| 1289 | 1,2,4,5,6,7<br>,8,10     | 3,9,11,12,<br>13,14,15,1<br>6  | 104 |                                                                                                                                                                                                                                                                                                                                                                                                                                                                                                                                                                                                                                                                                                                                                                                                                                                                                                                                                                                                                                                                                                                                                                                                                                                                                                                                                                                                                                                                                                                                                                                                                          |
| 1290 | 1,2,4,5,6,7<br>,8,11     | 3,9,10,12,<br>13,14,15,1<br>6  | 83  |                                                                                                                                                                                                                                                                                                                                                                                                                                                                                                                                                                                                                                                                                                                                                                                                                                                                                                                                                                                                                                                                                                                                                                                                                                                                                                                                                                                                                                                                                                                                                                                                                          |

|      |                      |                               |    |                                                                                                                                                                                                                                                                                                                                                                                                                                                                                                                                                                                                                                                                                                                                                                     |
|------|----------------------|-------------------------------|----|---------------------------------------------------------------------------------------------------------------------------------------------------------------------------------------------------------------------------------------------------------------------------------------------------------------------------------------------------------------------------------------------------------------------------------------------------------------------------------------------------------------------------------------------------------------------------------------------------------------------------------------------------------------------------------------------------------------------------------------------------------------------|
| 1291 | 1,2,4,5,6,7<br>,8,12 | 3,9,10,11,<br>13,14,15,1<br>6 | 53 | B1H234,D3ZHA0,D4A5U3,iRT-<br>Kit_WR_fusion,O55004,O88267,P02631,P02780,P02781,P06760,P06761,P06911,P12020,P13432,<br>P18418,P19223,P19629,P19814,P20760,P20762,P22282,P30904,P31044,P31430,P35952,P36860<br>,P46844,P48508,P50115,P50116,P50280,P52590,P55091,P80299,P98089,Q4G075,Q5GRG2,Q5R<br>LM2,Q62635,Q62946,Q63270,Q63618,Q66H69,Q66HG3,Q6Q0N1,Q6TMA8,Q8CIZ5,Q91ZS3,Q9<br>JI85,Q9QX74,Q9R0T3,Q9Z0V6,Q9Z1F2                                                                                                                                                                                                                                                                                                                                                   |
| 1292 | 1,2,4,5,6,7<br>,8,13 | 3,9,10,11,<br>12,14,15,1<br>6 | 58 | A2RUW1,B1H234,D3ZHA0,D4A5U3,O55004,O70257,O70594,P01836,P02631,P02781,P05371,P<br>06760,P06761,P06911,P07171,P07647,P13432,P18418,P19223,P19629,P20760,P20761,P20762,<br>P22282,P25809,P30904,P31044,P31430,P35952,P36860,P46844,P48508,P50115,P50116,P50280<br>,P52590,P55091,P80299,P98089,Q30KJ2,Q4G075,Q5GRG2,Q62635,Q62714,Q62946,Q63618,Q6<br>6H69,Q6PCU2,Q6Q0N1,Q6TMA8,Q78P75,Q8CIZ5,Q9JI85,Q9QX74,Q9R0T3,Q9WUW8,Q9Z0J6,<br>Q9Z1F2                                                                                                                                                                                                                                                                                                                           |
| 1293 | 1,2,4,5,6,7<br>,8,14 | 3,9,10,11,<br>12,13,15,1<br>6 | 54 | A2RUW1,B1H234,D3ZHA0,D4A5U3,O55004,O70594,P02631,P02781,P06760,P06761,P06911,P0<br>8649,P13432,P18418,P19223,P19629,P20646,P20760,P20761,P20762,P23928,P31044,P31430,P<br>35952,P48508,P50115,P50116,P50280,P52590,P54921,P55091,P57113,P63081,P80299,P97580,<br>P98089,Q30KJ2,Q4G075,Q5GRG2,Q5QE79,Q5RLM2,Q62635,Q62714,Q62946,Q66H69,Q6PCU2<br>,Q6TMA8,Q8CIZ5,Q9JI85,Q9QX74,Q9R0T3,Q9WUW8,Q9WUW9,Q9Z1F2                                                                                                                                                                                                                                                                                                                                                           |
| 1294 | 1,2,4,5,6,7<br>,8,15 | 3,9,10,11,<br>12,13,14,1<br>6 | 71 | A2RUW1,B1H234,D3ZHA0,D4A5U3,iRT-<br>Kit_WR_fusion,O08557,O55004,O70594,O88267,O88339,Q4V882,P02631,P06760,P06761,P069<br>11,P08721,P10247,P13432,P15999,P17988,P18418,P18757,P19112,P19132,P19223,P19629,P19<br>814,P20646,P20760,P20761,P20762,P23928,P30904,P31044,P31430,P35952,P36860,P38918,P4<br>6844,P48508,P50115,P50116,P50280,P52590,P54921,P55091,P80299,P98089,Q03248,Q30KJ2,Q<br>4G075,Q5GRG2,Q5I0E9,Q5M7T9,Q62635,Q62714,Q63270,Q63618,Q66H69,Q6MG61,Q6PCU2,<br>Q6Q0N1,Q6TMA8,Q8CIZ5,Q91Y81,Q9JI85,Q9QX74,Q9R0T3,Q9Z0J6,Q9Z0V6,Q9Z0W7,Q9Z1F2                                                                                                                                                                                                          |
| 1295 | 1,2,4,5,6,7<br>,8,16 | 3,9,10,11,<br>12,13,14,1<br>5 | 99 | B1H234,D3ZHA0,D4A5U3,iRT-<br>Kit_WR_fusion,O08557,O55004,O70257,O70594,O88267,P01836,P02631,P02761,P02780,P0278<br>1,P02782,P04904,P05371,P06760,P06761,P06911,P07151,P07647,P08649,P11598,P13432,P153<br>99,P17988,P18418,P18757,P19112,P19223,P19468,P19629,P20646,P20673,P20760,P20761,P20<br>762,P22282,P22283,P23928,P31044,P31430,P35952,P36860,P38918,P46844,P48508,P50115,P5<br>0116,P50280,P52590,P52847,P53790,P55091,P57113,P80299,P97580,P98089,Q03248,Q30KJ2,Q<br>3ZAV1,Q4G075,Q5GRG2,Q5I0D7,Q5I0E9,Q5M7T9,Q5M8C6,Q5RLM2,Q5U2Q3,Q62635,Q63270<br>,Q63618,Q64602,Q66H69,Q68FT5,Q6MG61,Q6PCU2,Q6Q0N1,Q6TMA8,Q71MB6,Q8CIZ5,Q8R4<br>31,Q8R5M3,Q91Y81,Q923S2,Q99MA2,Q9JHB9,Q9JI85,Q9JJ40,Q9JLJ3,Q9QX74,Q9QZK8,Q9R0T<br>3,Q9WUW8,Q9WUW9,Q9Z0J6,Q9Z0V6,Q9Z0W7 |
| 1296 | 1,2,4,5,6,7<br>,9,10 | 3,8,11,12,<br>13,14,15,1<br>6 | 18 | B1H234,D3ZTX0,O70594,P00762,P18418,P19223,P23928,P36860,P50116,P52590,P55091,P7054<br>5,P80299,Q63618,Q9R0T3,Q9WVH8,Q9Z0J6,Q9Z1F2                                                                                                                                                                                                                                                                                                                                                                                                                                                                                                                                                                                                                                   |
| 1297 | 1,2,4,5,6,7<br>,9,11 | 3,8,10,12,<br>13,14,15,1<br>6 | 18 | B1H234,P01039,P07647,P11598,P18418,P22283,P31430,P36860,P50116,P52590,P55091,P80299<br>,Q4KLZ6,Q63617,Q9EQS0,Q9R0T3,Q9R168,Q9Z0J6                                                                                                                                                                                                                                                                                                                                                                                                                                                                                                                                                                                                                                   |

|      |                       |                               |    |                                                                                                                                                                                                                                                                                                                                   |
|------|-----------------------|-------------------------------|----|-----------------------------------------------------------------------------------------------------------------------------------------------------------------------------------------------------------------------------------------------------------------------------------------------------------------------------------|
| 1298 | 1,2,4,5,6,7<br>,9,12  | 3,8,10,11,<br>13,14,15,1<br>6 | 10 | B1H234,P18418,P19814,P36860,P50116,P52590,P55091,P80299,Q03191,Q9R0T3                                                                                                                                                                                                                                                             |
| 1299 | 1,2,4,5,6,7<br>,9,13  | 3,8,10,11,<br>12,14,15,1<br>6 | 11 | B1H234,P15978,P18418,P19223,P36860,P50116,P52590,P55091,P80299,Q9EQS0,Q9Z0J6                                                                                                                                                                                                                                                      |
| 1300 | 1,2,4,5,6,7<br>,9,14  | 3,8,10,11,<br>12,13,15,1<br>6 | 8  | B1H234,P00762,P18418,P50116,P52590,P55091,P80299,Q9R168                                                                                                                                                                                                                                                                           |
| 1301 | 1,2,4,5,6,7<br>,9,15  | 3,8,10,11,<br>12,13,14,1<br>6 | 10 | B1H234,P00762,P08721,P18418,P36860,P50116,P52590,P55091,P80299,Q9Z0J6                                                                                                                                                                                                                                                             |
| 1302 | 1,2,4,5,6,7<br>,9,16  | 3,8,10,11,<br>12,13,14,1<br>5 | 13 | B1H234,P07647,P15978,P18418,P22006,P50116,P52590,P55091,P80299,Q6TMA8,Q9EQS0,Q9R168,Q9Z0J6                                                                                                                                                                                                                                        |
| 1303 | 1,2,4,5,6,7<br>,10,11 | 3,8,9,12,1<br>3,14,15,16      | 18 | B1H234,O08557,P01039,P07647,P08721,P11598,P17988,P18418,P22283,P31430,P36860,P50116,P52590,P55091,P80299,Q4KLZ6,Q9R0T3,Q9Z0J6                                                                                                                                                                                                     |
| 1304 | 1,2,4,5,6,7<br>,10,12 | 3,8,9,11,1<br>3,14,15,16      | 14 | B1H234,O88267,P18418,P19814,P36860,P48508,P50116,P55091,P57113,P80299,Q5RLM2,Q63618,Q66HG3,Q9R0T3                                                                                                                                                                                                                                 |
| 1305 | 1,2,4,5,6,7<br>,10,13 | 3,8,9,11,1<br>2,14,15,16      | 18 | A2RUW1,B1H234,O70594,P01835,P18418,P19223,P23928,P36860,P48508,P50116,P52590,P55091,P57113,P80299,Q63618,Q9R0T3,Q9WUW8,Q9Z1F2                                                                                                                                                                                                     |
| 1306 | 1,2,4,5,6,7<br>,10,14 | 3,8,9,11,1<br>2,13,15,16      | 22 | A2RUW1,B1H234,O08557,O70594,P09527,P18418,P19223,P23928,P36860,P48037,P48508,P50116,P52590,P54921,P55091,P57113,P80299,Q5RLM2,Q63618,Q80WL1,Q9WUW8,Q9Z1F2                                                                                                                                                                         |
| 1307 | 1,2,4,5,6,7<br>,10,15 | 3,8,9,11,1<br>2,13,14,16      | 31 | A2RUW1,B1H234,O08557,O70594,O88267,O88339,Q4V882,P08721,P09527,P17988,P18297,P18418,P19468,P23928,P36860,P38918,P48508,P50116,P51907,P54921,P55091,P57113,P80299,Q03248,Q5I0E9,Q63270,Q63618,Q6MG61,Q6Q0N1,Q8K3P7,Q99MA2,Q9Z1F2                                                                                                   |
| 1308 | 1,2,4,5,6,7<br>,10,16 | 3,8,9,11,1<br>2,13,14,15      | 46 | B1H234,O08557,O70594,O88267,P07647,P09527,P17988,P18297,P18418,P18757,P19223,P19468,P23928,P36860,P46844,P48037,P48508,P50116,P52590,P53790,P55091,P57113,P80299,Q03248,Q3ZAV1,Q5I0E9,Q5M7T9,Q5RLM2,Q63270,Q63424,Q63618,Q64602,Q68FT5,Q6MG61,Q6Q0N1,Q6TMA8,Q71MB6,Q8R431,Q923S2,Q99MA2,Q9JJ40,Q9QYU4,Q9R0T3,Q9WUW8,Q9Z0J6,Q9Z0W7 |
| 1309 | 1,2,4,5,6,7<br>,11,12 | 3,8,9,10,1<br>3,14,15,16      | 22 | B1H234,O35547,P01039,P02780,P07647,P11598,P18418,P22283,P31430,P36374,P36860,P47967,P50116,P52590,P55091,P80299,Q4KLZ6,Q5GRG2,Q5I0D1,Q63617,Q9JI85,Q9R0T3                                                                                                                                                                         |
| 1310 | 1,2,4,5,6,7<br>,11,13 | 3,8,9,10,1<br>2,14,15,16      | 20 | B1H234,P01039,P02781,P07647,P11598,P18418,P22283,P31430,P36860,P50116,P52590,P55091,P80299,Q4KLZ6,Q5GRG2,Q63617,Q9EQS0,Q9JI85,Q9R0T3,Q9Z0J6                                                                                                                                                                                       |
| 1311 | 1,2,4,5,6,7<br>,11,14 | 3,8,9,10,1<br>2,13,15,16      | 15 | B1H234,P01039,P07647,P08649,P11598,P18418,P22283,P31430,P50116,P52590,P55091,P80299,Q4KLZ6,Q5GRG2,Q9R0T3                                                                                                                                                                                                                          |
| 1312 | 1,2,4,5,6,7<br>,11,15 | 3,8,9,10,1<br>2,13,14,16      | 22 | B1H234,O08557,P01039,P07647,P08721,P11598,P17988,P18418,P22283,P31430,P36860,P50116,P52590,P55091,P80299,Q4FZU2,Q4KLZ6,Q5GRG2,Q6P6Q2,Q8CJ52,Q9R0T3,Q9Z0J6                                                                                                                                                                         |

|      |                       |                               |                                                                                                                                                                                                                                                   |
|------|-----------------------|-------------------------------|---------------------------------------------------------------------------------------------------------------------------------------------------------------------------------------------------------------------------------------------------|
| 1313 | 1,2,4,5,6,7<br>,11,16 | 3,8,9,10,1<br>2,13,14,15      | B1H234,O35547,P01039,P02761,P02780,P02781,P02782,P07647,P08649,P08721,P08723,P0945<br>33 6,P0C0A9,P11598,P17988,P18418,P22283,P31430,P36374,P50116,P52590,P55091,P80299,Q4KL<br>Z6,Q5GRG2,Q5M872,Q63617,Q6TMA8,Q8R5M3,Q9EQS0,Q9JHB9,Q9R0T3,Q9Z0J6 |
| 1314 | 1,2,4,5,6,7<br>,12,13 | 3,8,9,10,1<br>1,14,15,16      | 10 B1H234,P01835,P19814,P36860,P47967,P50116,P52590,P55091,P80299,Q9R0T3                                                                                                                                                                          |
| 1315 | 1,2,4,5,6,7<br>,12,14 | 3,8,9,10,1<br>1,13,15,16      | 6 B1H234,P19814,P50116,P52590,P80299,Q5RLM2                                                                                                                                                                                                       |
| 1316 | 1,2,4,5,6,7<br>,12,15 | 3,8,9,10,1<br>1,13,14,16      | 8 B1H234,P08721,P17988,P19814,P36860,P50116,P52590,P80299                                                                                                                                                                                         |
| 1317 | 1,2,4,5,6,7<br>,12,16 | 3,8,9,10,1<br>1,13,14,15      | 11 B1H234,P07647,P17988,P18418,P50116,P52590,P80299,Q5I0D7,Q6TMA8,Q9R0T3,Q9Z0J6                                                                                                                                                                   |
| 1318 | 1,2,4,5,6,7<br>,13,14 | 3,8,9,10,1<br>1,12,15,16      | 10 A2RUW1,B1H234,P01835,P02761,P19223,P50116,P52590,P80299,Q9EQS0,Q9WUW8                                                                                                                                                                          |
| 1319 | 1,2,4,5,6,7<br>,13,15 | 3,8,9,10,1<br>1,12,14,16      | 11 A2RUW1,B1H234,P01835,P08721,P36860,P50116,P52590,P80299,Q62714,Q63618,Q9Z0J6                                                                                                                                                                   |
| 1320 | 1,2,4,5,6,7<br>,13,16 | 3,8,9,10,1<br>1,12,14,15      | 17 B1H234,P01835,P02761,P07647,P18418,P19223,P36860,P50116,P52590,P80299,Q5I0D7,Q6TM<br>A8,Q8R5M3,Q9EQS0,Q9R0T3,Q9WUW8,Q9Z0J6                                                                                                                     |
| 1321 | 1,2,4,5,6,7<br>,14,15 | 3,8,9,10,1<br>1,12,13,16      | 9 A2RUW1,B1H234,P08721,P17988,P50116,P52590,P54921,P80299,Q62714                                                                                                                                                                                  |
| 1322 | 1,2,4,5,6,7<br>,14,16 | 3,8,9,10,1<br>1,12,13,15      | 15 B1H234,P02761,P07647,P17988,P18418,P19223,P48037,P50116,P52590,P80299,Q4KLZ6,Q5RL<br>M2,Q6TMA8,Q9EQS0,Q9WUW8                                                                                                                                   |
| 1323 | 1,2,4,5,6,7<br>,15,16 | 3,8,9,10,1<br>1,12,13,14      | 20 B1H234,B2RYW9,O08557,O70594,P02761,P07647,P08721,P10719,P17988,P18418,P36860,P485<br>08,P50116,P52590,P80299,Q03248,Q5I0D7,Q63270,Q6TMA8,Q9Z0J6                                                                                                |
| 1324 | 1,2,4,5,6,8<br>,9,10  | 3,7,11,12,<br>13,14,15,1<br>6 | 17 D3ZTX0,O70594,P02454,P02631,P15399,P17559,P18418,P20760,P25031,P35952,P36860,P5259<br>0,P55091,P70545,P97580,Q30KJ2,Q63618                                                                                                                     |
| 1325 | 1,2,4,5,6,8<br>,9,11  | 3,7,10,12,<br>13,14,15,1<br>6 | 19 B1H234,P18418,P20760,P31430,P50280,P52590,P55091,P60905,P61206,P84079,Q09326,Q1075<br>8,Q3T1J1,Q4KLZ6,Q5GRG2,Q5RKI1,Q63493,Q6IFU8,Q6P6S4,Q9JI85                                                                                                |
| 1326 | 1,2,4,5,6,8<br>,9,12  | 3,7,10,11,<br>13,14,15,1<br>6 | 9 P18418,P20760,P31430,P36860,P52590,P55091,P98089,Q03191,Q5RKI1                                                                                                                                                                                  |
| 1327 | 1,2,4,5,6,8<br>,9,13  | 3,7,10,11,<br>12,14,15,1<br>6 | 9 B1H234,P18418,P19223,P20760,P36860,P52590,P55091,Q5RKI1,Q9JI85                                                                                                                                                                                  |
| 1328 | 1,2,4,5,6,8<br>,9,14  | 3,7,10,11,<br>12,13,15,1<br>6 | 7 P18418,P20760,P52590,P55091,P97580,Q30KJ2,Q5RKI1                                                                                                                                                                                                |
| 1329 | 1,2,4,5,6,8<br>,9,15  | 3,7,10,11,<br>12,13,14,1<br>6 | 7 P13432,P18418,P19132,P20760,P36860,P52590,P55091                                                                                                                                                                                                |

1330 1,2,4,5,6,8 3,7,10,11,  
,9,16 12,13,14,15

1331 1,2,4,5,6,8 3,7,9,12,1  
,10,11 3,14,15,16

1332 1,2,4,5,6,8 3,7,9,11,1  
,10,12 3,14,15,16

1333 1,2,4,5,6,8 3,7,9,11,1  
,10,13 2,14,15,16

1334 1,2,4,5,6,8 3,7,9,11,1  
,10,14 2,13,15,16

1335 1,2,4,5,6,8 3,7,9,11,1  
,10,15 2,13,14,16

1336 1,2,4,5,6,8 3,7,9,11,1  
,10,16 2,13,14,15

1337 1,2,4,5,6,8 3,7,9,10,1  
,11,12 3,14,15,16

1338 1,2,4,5,6,8 3,7,9,10,1  
,11,13 2,14,15,16

1339 1,2,4,5,6,8 3,7,9,10,1  
,11,14 2,13,15,16

1340 1,2,4,5,6,8 3,7,9,10,1  
,11,15 2,13,14,16

1341 1,2,4,5,6,8 3,7,9,10,1  
,11,16 2,13,14,15

1342 1,2,4,5,6,8 3,7,9,10,1  
,12,13 1,14,15,16

1343 1,2,4,5,6,8 3,7,9,10,1  
,12,14 1,13,15,16

1344 1,2,4,5,6,8 3,7,9,10,1  
,12,15 1,13,14,16

1345 1,2,4,5,6,8 3,7,9,10,1  
,12,16 1,13,14,15

12 P07647,P13432,P15399,P18418,P20760,P23593,P52590,P55091,P97580,Q30KJ2,Q5RKI1,Q9Z0J6

19 B1H234,P15399,P18418,P20760,P25031,P31430,P35952,P36860,P50280,P52590,P55091,P97580  
,Q10758,Q30KJ2,Q4KLZ6,Q5GRG2,Q68G31,Q6IFU8,Q9JI85  
O55004,O88267,P02454,P02631,P0DMW0,P0DMW1,P15399,P18418,P19814,P20760,P25031,P3  
24 0904,P31430,P35952,P36860,P48508,P55091,P97580,P98089,Q30KJ2,Q498D9,Q5RLM2,Q63618  
,Q66HG3,Q91ZS3

21 A2RUW1,O55004,O70257,O70594,P02631,P15399,P18418,P19223,P20760,P25031,P35952,P36  
860,P52590,P55091,P97580,Q30KJ2,Q498D9,Q63618,Q68G31,Q8CIZ5,Q9JI85

18 A2RUW1,P15399,P18418,P19223,P20760,P20762,P25031,P35952,P48508,P52590,P54921,P5509  
1,P97580,Q30KJ2,Q5RLM2,Q63618,Q68G31,Q9WUW8

30 A2RUW1,O55004,O70594,O88267,O88339,Q4V882,P10247,P13432,P15399,P18418,P19132,P1  
9629,P20760,P20762,P23928,P25031,P30904,P35952,P36860,P48508,P54921,P55091,P97580,Q  
30KJ2,Q498D9,Q63270,Q63474,Q63618,Q68G31,Q6PCU2,Q6Q0N1  
O55004,O70257,O70594,O88267,P02631,P07151,P07647,P15399,P18418,P19223,P19468,P196  
29,P20760,P20762,P23928,P25031,P35952,P46844,P48508,P50280,P52590,P53790,P55091,P57  
36 113,P97580,Q03248,Q30KJ2,Q3ZAV1,Q5M7T9,Q63270,Q63618,Q6Q0N1,Q71MB6,Q8R431,Q9  
23S2,Q99MA2

26 B1H234,O35547,P02780,P02781,P06911,P12020,P14046,P18418,P22282,P31430,P36374,P4024  
1,P50280,P52590,P55091,P98089,Q09326,Q10758,Q3T1J1,Q4KLZ6,Q5GRG2,Q5RKI1,Q63493,Q  
6IFU8,Q6IG05,Q9JI85

27 B1H234,P02781,P06911,P07647,P12020,P18418,P22282,P31430,P35952,P36860,P40241,P50280  
,P52590,P55091,P60905,Q09326,Q10758,Q3T1J1,Q4KLZ6,Q5GRG2,Q5RKI1,Q63493,Q66H69,Q  
68G31,Q6IFU8,Q8CIZ5,Q9JI85

21 B1H234,P06911,P12020,P15399,P18418,P19218,P20760,P31430,P50280,P52590,P55091,P97580  
,Q09326,Q10758,Q3T1J1,Q4KLZ6,Q5GRG2,Q5RKI1,Q62635,Q6IFU8,Q9JI85

20 B1H234,P15399,P18418,P31430,P50280,P52590,P55091,Q10758,Q4FZU2,Q4KLZ6,Q5GRG2,Q63  
493,Q6IFU7,Q6IFU8,Q6IFW6,Q6IG05,Q6IMF3,Q6P6Q2,Q8CJ52,Q9JI85

41 B1H234,O35547,O88917,P02780,P02781,P02782,P04905,P06911,P07647,P08723,P09456,P0C0  
A9,P12020,P15399,P18418,P20760,P22282,P22283,P30120,P31430,P36374,P40241,P46462,P50  
280,P52590,P55091,P60905,P97580,Q10758,Q30KJ2,Q4KLZ6,Q5GRG2,Q5M8C6,Q5RKI1,Q6349  
3,Q6GMN2,Q6IFU8,Q6P6Q2,Q9JHB9,Q9JI85,Q9Z0J6

12 P02631,P18418,P19814,P31430,P36860,P52590,P55091,P98089,Q5RKI1,Q66H69,Q8CIZ5,Q9JI8  
5

12 P06911,P18418,P19814,P20760,P31430,P52590,P97580,P98089,Q5GRG2,Q5RKI1,Q5RLM2,Q62  
635

9 P13432,P18418,P19132,P19814,P31430,P36860,P98089,Q498D9,Q6IG05

11 O88267,P07647,P15399,P18418,P20760,P52590,P97580,P98089,Q30KJ2,Q5RKI1,Q9JI85

|      |                       |                          |    |                                                                                                                                      |
|------|-----------------------|--------------------------|----|--------------------------------------------------------------------------------------------------------------------------------------|
| 1346 | 1,2,4,5,6,8<br>,13,14 | 3,7,9,10,1<br>1,12,15,16 | 15 | A2RUW1,B1H234,P18418,P19223,P20760,P52590,P97580,Q30KJ2,Q5RKI1,Q62635,Q68G31,Q8CIZ5,Q9JI85,Q9QWN8,Q9WUW8                             |
| 1347 | 1,2,4,5,6,8<br>,13,15 | 3,7,9,10,1<br>1,12,14,16 | 17 | A2RUW1,B1H234,P13432,P15399,P18418,P19132,P20760,P35952,P36860,P52590,Q30KJ2,Q498D9,Q63618,Q68G31,Q6PCU2,Q8CIZ5,Q9JI85               |
| 1348 | 1,2,4,5,6,8<br>,13,16 | 3,7,9,10,1<br>1,12,14,15 | 16 | B1H234,O55004,P02781,P07151,P07647,P15399,P18418,P19223,P20760,P52590,P97580,Q30KJ2,Q5RKI1,Q6TMA8,Q9JI85,Q9Z0J6                      |
| 1349 | 1,2,4,5,6,8<br>,14,15 | 3,7,9,10,1<br>1,12,13,16 | 13 | A2RUW1,P13432,P15399,P18418,P19132,P20760,P20762,P50280,P52590,P54921,P97580,Q30KJ2,Q6PCU2                                           |
| 1350 | 1,2,4,5,6,8<br>,14,16 | 3,7,9,10,1<br>1,12,13,15 | 15 | B1H234,P07647,P15399,P18418,P19223,P20760,P20762,P50280,P52590,P97580,Q30KJ2,Q4KLZ6,Q5RKI1,Q6TMA8,Q9WUW8                             |
| 1351 | 1,2,4,5,6,8<br>,15,16 | 3,7,9,10,1<br>1,12,13,14 | 19 | B2RYW9,O88267,P07151,P07647,P13432,P15399,P17988,P18418,P19629,P20760,P20762,P48508,P50280,P52590,P97580,Q30KJ2,Q63270,Q6PCU2,Q6TMA8 |
| 1352 | 1,2,4,5,6,9<br>,10,11 | 3,7,8,12,1<br>3,14,15,16 | 3  | B1H234,P36860,Q4KLZ6                                                                                                                 |
| 1353 | 1,2,4,5,6,9<br>,10,12 | 3,7,8,11,1<br>3,14,15,16 | 2  | P36860,Q03191                                                                                                                        |
| 1354 | 1,2,4,5,6,9<br>,10,13 | 3,7,8,11,1<br>2,14,15,16 | 4  | D3ZTX0,P11883,P36860,Q9EQS0                                                                                                          |
| 1355 | 1,2,4,5,6,9<br>,10,14 | 3,7,8,11,1<br>2,13,15,16 | 2  | P00762,P52590                                                                                                                        |
| 1356 | 1,2,4,5,6,9<br>,10,15 | 3,7,8,11,1<br>2,13,14,16 | 3  | P00762,P36860,Q811M5                                                                                                                 |
| 1357 | 1,2,4,5,6,9<br>,10,16 | 3,7,8,11,1<br>2,13,14,15 | 5  | D3ZUC6,P11883,P52590,Q811M5,Q9EQS0                                                                                                   |
| 1358 | 1,2,4,5,6,9<br>,11,12 | 3,7,8,10,1<br>3,14,15,16 | 6  | B1H234,O35077,P61206,P84079,Q03191,Q4KLZ6,Q5RKI1                                                                                     |
| 1359 | 1,2,4,5,6,9<br>,11,13 | 3,7,8,10,1<br>2,14,15,16 | 5  | B1H234,P52590,Q4KLZ6,Q5RKI1,Q9EQS0                                                                                                   |
| 1360 | 1,2,4,5,6,9<br>,11,14 | 3,7,8,10,1<br>2,13,15,16 | 5  | B1H234,P52590,Q4KLZ6,Q5I0J9,Q5RKI1                                                                                                   |
| 1361 | 1,2,4,5,6,9<br>,11,15 | 3,7,8,10,1<br>2,13,14,16 | 2  | B1H234,Q4KLZ6                                                                                                                        |
| 1362 | 1,2,4,5,6,9<br>,11,16 | 3,7,8,10,1<br>2,13,14,15 | 10 | B1H234,D3ZUC6,P07647,P22006,P52590,P70549,Q4KLZ6,Q5RKI1,Q9EQS0,Q9Z0J6                                                                |
| 1363 | 1,2,4,5,6,9<br>,12,13 | 3,7,8,10,1<br>1,14,15,16 | 5  | P36860,P52590,Q03191,Q5RKI1,Q9EQS0                                                                                                   |
| 1364 | 1,2,4,5,6,9<br>,12,14 | 3,7,8,10,1<br>1,13,15,16 | 3  | P52590,Q03191,Q5RKI1                                                                                                                 |
| 1365 | 1,2,4,5,6,9<br>,12,15 | 3,7,8,10,1<br>1,13,14,16 | 2  | P36860,Q03191                                                                                                                        |

|      |                        |                          |   |                                                  |
|------|------------------------|--------------------------|---|--------------------------------------------------|
| 1366 | 1,2,4,5,6,9<br>,12,16  | 3,7,8,10,1<br>1,13,14,15 | 4 | D3ZUC6,P52590,Q03191,Q5RKI1                      |
| 1367 | 1,2,4,5,6,9<br>,13,14  | 3,7,8,10,1<br>1,12,15,16 | 4 | B1H234,P52590,Q5RKI1,Q9EQS0                      |
| 1368 | 1,2,4,5,6,9<br>,13,15  | 3,7,8,10,1<br>1,12,14,16 | 5 | B1H234,P11883,P36860,P62804,Q9EQS0               |
| 1369 | 1,2,4,5,6,9<br>,13,16  | 3,7,8,10,1<br>1,12,14,15 | 7 | B1H234,D3ZUC6,P11883,P52590,Q5RKI1,Q9EQS0,Q9Z0J6 |
| 1370 | 1,2,4,5,6,9<br>,14,15  | 3,7,8,10,1<br>1,12,13,16 | 1 | P52590                                           |
| 1371 | 1,2,4,5,6,9<br>,14,16  | 3,7,8,10,1<br>1,12,13,15 | 6 | B1H234,P23593,P52590,Q4KLZ6,Q5RKI1,Q9EQS0        |
| 1372 | 1,2,4,5,6,9<br>,15,16  | 3,7,8,10,1<br>1,12,13,14 | 4 | D3ZUC6,P11883,P52590,Q9EQS0                      |
| 1373 | 1,2,4,5,6,1<br>0,11,12 | 3,7,8,9,13,<br>14,15,16  | 3 | P35280,P36860,Q4KLZ6                             |
| 1374 | 1,2,4,5,6,1<br>0,11,13 | 3,7,8,9,12,<br>14,15,16  | 5 | B1H234,P35280,P36860,Q4KLZ6,Q68G31               |
| 1375 | 1,2,4,5,6,1<br>0,11,14 | 3,7,8,9,12,<br>13,15,16  | 4 | B1H234,P35280,P52590,Q4KLZ6                      |
| 1376 | 1,2,4,5,6,1<br>0,11,15 | 3,7,8,9,12,<br>13,14,16  | 4 | B1H234,P17988,P36860,Q4KLZ6                      |
| 1377 | 1,2,4,5,6,1<br>0,11,16 | 3,7,8,9,12,<br>13,14,15  | 6 | B1H234,P07647,P17988,P35280,P52590,Q4KLZ6        |
| 1378 | 1,2,4,5,6,1<br>0,12,13 | 3,7,8,9,11,<br>14,15,16  | 3 | P19814,P35280,P36860                             |
| 1379 | 1,2,4,5,6,1<br>0,12,14 | 3,7,8,9,11,<br>13,15,16  | 4 | P19814,P35280,P52590,Q5RLM2                      |
| 1380 | 1,2,4,5,6,1<br>0,12,15 | 3,7,8,9,11,<br>13,14,16  | 4 | P19814,P35280,P36860,Q498D9                      |
| 1381 | 1,2,4,5,6,1<br>0,12,16 | 3,7,8,9,11,<br>13,14,15  | 4 | O88267,P0DMW0;P0DMW1,P35280,P52590               |
| 1382 | 1,2,4,5,6,1<br>0,13,14 | 3,7,8,9,11,<br>12,15,16  | 4 | A2RUW1,B1H234,P35280,P52590                      |
| 1383 | 1,2,4,5,6,1<br>0,13,15 | 3,7,8,9,11,<br>12,14,16  | 7 | A2RUW1,P11883,P21674,P35280,P36860,Q498D9,Q63618 |
| 1384 | 1,2,4,5,6,1<br>0,13,16 | 3,7,8,9,11,<br>12,14,15  | 5 | P11883,P35280,P52590,Q63618,Q9EQS0               |
| 1385 | 1,2,4,5,6,1<br>0,14,15 | 3,7,8,9,11,<br>12,13,16  | 4 | A2RUW1,P35280,P52590,P54921                      |



|      |                        |                         |                                                                  |
|------|------------------------|-------------------------|------------------------------------------------------------------|
| 1386 | 1,2,4,5,6,1<br>0,14,16 | 3,7,8,9,11,<br>12,13,15 | 3 P35280,P52590,Q4KLZ6                                           |
| 1387 | 1,2,4,5,6,1<br>0,15,16 | 3,7,8,9,11,<br>12,13,14 | 4 O88267,P11883,P17988,P35280                                    |
| 1388 | 1,2,4,5,6,1<br>1,12,13 | 3,7,8,9,10,<br>14,15,16 | 4 B1H234,P35280,Q4KLZ6,Q5RKI1                                    |
| 1389 | 1,2,4,5,6,1<br>1,12,14 | 3,7,8,9,10,<br>13,15,16 | 6 B1H234,P35280,P52590,Q4KLZ6,Q5GRG2,Q5RKI1                      |
| 1390 | 1,2,4,5,6,1<br>1,12,15 | 3,7,8,9,10,<br>13,14,16 | 2 B1H234,Q4KLZ6                                                  |
| 1391 | 1,2,4,5,6,1<br>1,12,16 | 3,7,8,9,10,<br>13,14,15 | 7 B1H234,O35547,P07647,P35280,P52590,Q4KLZ6,Q5RKI1               |
| 1392 | 1,2,4,5,6,1<br>1,13,14 | 3,7,8,9,10,<br>12,15,16 | 6 B1H234,P35280,P52590,Q4KLZ6,Q5RKI1,Q9EQS0                      |
| 1393 | 1,2,4,5,6,1<br>1,13,15 | 3,7,8,9,10,<br>12,14,16 | 6 B1H234,O70417,P21674,P36860,Q4KLZ6,Q9EQS0                      |
| 1394 | 1,2,4,5,6,1<br>1,13,16 | 3,7,8,9,10,<br>12,14,15 | 9 B1H234,O35547,P07647,P35280,P52590,Q4KLZ6,Q5RKI1,Q9EQS0,Q9Z0J6 |
| 1395 | 1,2,4,5,6,1<br>1,14,15 | 3,7,8,9,10,<br>12,13,16 | 3 B1H234,P52590,Q4KLZ6                                           |
| 1396 | 1,2,4,5,6,1<br>1,14,16 | 3,7,8,9,10,<br>12,13,15 | 7 B1H234,P07647,P35280,P52590,Q4KLZ6,Q5RKI1,Q9EQS0               |
| 1397 | 1,2,4,5,6,1<br>1,15,16 | 3,7,8,9,10,<br>12,13,14 | 6 B1H234,P07647,P17988,P52590,Q4KLZ6,Q8CJ52                      |
| 1398 | 1,2,4,5,6,1<br>2,13,14 | 3,7,8,9,10,<br>11,15,16 | 3 P35280,P52590,Q5RKI1                                           |
| 1399 | 1,2,4,5,6,1<br>2,13,15 | 3,7,8,9,10,<br>11,14,16 | 3 P19814,P35280,P36860                                           |
| 1400 | 1,2,4,5,6,1<br>2,13,16 | 3,7,8,9,10,<br>11,14,15 | 4 P35280,P52590,Q5RKI1,Q9EQS0                                    |
| 1401 | 1,2,4,5,6,1<br>2,14,15 | 3,7,8,9,10,<br>11,13,16 | 3 P19814,P35280,P52590                                           |
| 1402 | 1,2,4,5,6,1<br>2,14,16 | 3,7,8,9,10,<br>11,13,15 | 4 P35280,P52590,Q4KLZ6,Q5RKI1                                    |
| 1403 | 1,2,4,5,6,1<br>2,15,16 | 3,7,8,9,10,<br>11,13,14 | 3 P17988,P35280,P52590                                           |
| 1404 | 1,2,4,5,6,1<br>3,14,15 | 3,7,8,9,10,<br>11,12,16 | 5 A2RUW1,B1H234,P21674,P35280,P52590                             |
| 1405 | 1,2,4,5,6,1<br>3,14,16 | 3,7,8,9,10,<br>11,12,15 | 6 B1H234,P35280,P52590,Q4KLZ6,Q5RKI1,Q9EQS0                      |

|      |                        |                               |    |                                                                                                                                                                                                                            |
|------|------------------------|-------------------------------|----|----------------------------------------------------------------------------------------------------------------------------------------------------------------------------------------------------------------------------|
| 1406 | 1,2,4,5,6,1<br>3,15,16 | 3,7,8,9,10,<br>11,12,14       | 6  | B1H234,O70417,P11883,P35280,P52590,Q9EQS0                                                                                                                                                                                  |
| 1407 | 1,2,4,5,6,1<br>4,15,16 | 3,7,8,9,10,<br>11,12,13       | 4  | P17988,P35280,P52590,Q4KLZ6                                                                                                                                                                                                |
| 1408 | 1,2,4,5,7,8<br>,9,10   | 3,6,11,12,<br>13,14,15,1<br>6 | 17 | D4A5U3,O70594,P06760,P18418,P19223,P20646,P20760,P20762,P36860,P70545,Q63618,Q66H69,Q6TMA8,Q8CIZ5,Q9QX74,Q9Z0V6,Q9Z1F2                                                                                                     |
| 1409 | 1,2,4,5,7,8<br>,9,11   | 3,6,10,12,<br>13,14,15,1<br>6 | 29 | D4A5U3,iRT -<br>Kit_WR_fusion,P02780,P02781,P06760,P07150,P08649,P08723,P09456,P18418,P20646,P20760,P27590,P31430,P40241,P97697,Q10758,Q4G075,Q63493,Q66H69,Q6IFU8,Q6IMF3,Q6P6Q2,Q6TMA8,Q812E4,Q9JHB9,Q9QX74,Q9WTT6,Q9Z0V6 |
| 1410 | 1,2,4,5,7,8<br>,9,12   | 3,6,10,11,<br>13,14,15,1<br>6 | 12 | D4A5U3,iRT -<br>Kit_WR_fusion,P06760,P20646,P20760,Q03191,Q66H69,Q6TMA8,Q8CIZ5,Q9QX74,Q9Z0V6,Q9Z1F2                                                                                                                        |
| 1411 | 1,2,4,5,7,8<br>,9,13   | 3,6,10,11,<br>12,14,15,1<br>6 | 14 | D4A5U3,P06760,P19223,P20646,P20760,P36860,P80299,P97697,Q66H69,Q6TMA8,Q8CIZ5,Q9QX74,Q9Z0V6,Q9Z1F2                                                                                                                          |
| 1412 | 1,2,4,5,7,8<br>,9,14   | 3,6,10,11,<br>12,13,15,1<br>6 | 14 | D3ZHA0,D4A5U3,P06760,P08649,P19223,P20646,P20760,Q4G075,Q62635,Q6TMA8,Q8CIZ5,Q9QX74,Q9Z0V6,Q9Z1F2                                                                                                                          |
| 1413 | 1,2,4,5,7,8<br>,9,15   | 3,6,10,11,<br>12,13,14,1<br>6 | 10 | P06760,P08649,P15999,P19132,P20646,P20760,Q6TMA8,Q9QX74,Q9Z0V6,Q9Z1F2                                                                                                                                                      |
| 1414 | 1,2,4,5,7,8<br>,9,16   | 3,6,10,11,<br>12,13,14,1<br>5 | 13 | D3ZHA0,D4A5U3,P06760,P08649,P18418,P19223,P20646,P20760,P20762,Q6TMA8,Q9QX74,Q9Z0J6,Q9Z0V6                                                                                                                                 |
| 1415 | 1,2,4,5,7,8<br>,10,11  | 3,6,9,12,1<br>3,14,15,16      | 30 | P02780,P02781,P06760,P07150,P08723,P18418,P19223,P20646,P20762,P22282,P27590,P31430,P36860,P40241,Q10758,Q4FZU2,Q4G075,Q63493,Q66H69,Q6B345,Q6IFU8,Q6IMF3,Q6P6Q2,Q6TMA8,Q8CIZ5,Q9JHB9,Q9QX74,Q9R0T3,Q9Z0V6,Q9Z1F2          |
| 1416 | 1,2,4,5,7,8<br>,10,12  | 3,6,9,11,1<br>3,14,15,16      | 17 | O88267,P06760,P18418,P19814,P20762,P30904,P36860,P48508,Q5RLM2,Q63618,Q66H69,Q6Q0N1,Q6TMA8,Q8CIZ5,Q9QX74,Q9Z0V6,Q9Z1F2                                                                                                     |
| 1417 | 1,2,4,5,7,8<br>,10,13  | 3,6,9,11,1<br>2,14,15,16      | 30 | D4A5U3,O55004,O70257,O70594,P06760,P18418,P19223,P19468,P20646,P20760,P20762,P25809,P30904,P36860,P46844,P48508,P51907,P80299,Q3ZAV1,Q4G075,Q63618,Q66H69,Q6PCU2,Q6Q0N1,Q6TMA8,Q8CIZ5,Q9QX74,Q9WUW8,Q9WUW9,Q9Z1F2          |
| 1418 | 1,2,4,5,7,8<br>,10,14  | 3,6,9,11,1<br>2,13,15,16      | 23 | O70594,P06760,P18418,P19223,P20646,P20760,P20762,P25809,P48508,P54921,Q4G075,Q5RLM2,Q62635,Q63618,Q66H69,Q6PCU2,Q6TMA8,Q8CIZ5,Q9Z3S2,Q9QX74,Q9WUW8,Q9WUW9,Q9Z1F2                                                           |

|      |                       |                          |                                                                                                                                                                                                                                                                                                                                                                  |
|------|-----------------------|--------------------------|------------------------------------------------------------------------------------------------------------------------------------------------------------------------------------------------------------------------------------------------------------------------------------------------------------------------------------------------------------------|
| 1419 | 1,2,4,5,7,8<br>,10,15 | 3,6,9,11,1<br>2,13,14,16 | 44 O08557,O70594,O88267,O88339,Q4V882,P06760,P10536,P18418,P19132,P19223,P19468,P20646,P20760,P20762,P23928,P30904,P36860,P46844,P48508,P51907,P53790,P54921,Q05175,Q3ZAV1,Q5I0E9,Q5M7T9,Q63270,Q63355,Q63424,Q63618,Q64093,Q66H69,Q6MG61,Q6PCU2,Q6Q0N1,Q6TMA8,Q80W57,Q8CIZ5,Q8R431,Q923S2,Q9QX74,Q9WTW7,Q9Z0V6,Q9Z0W7,Q9Z1F2                                    |
| 1420 | 1,2,4,5,7,8<br>,10,16 | 3,6,9,11,1<br>2,13,14,15 | 50 O55004,O70257,O70594,O88267,P02781,P06760,P07151,P18418,P18757,P19223,P19468,P20646,P20760,P20762,P23928,P46844,P48508,P51907,P53790,P57113,Q03248,Q05175,Q30KJ2,Q3ZAV1,Q4G075,Q5I0E9,Q5M7T9,Q5RLM2,Q63270,Q63355,Q63424,Q63618,Q64093,Q64602,Q66H69,Q6MG61,Q6Q0N1,Q6TMA8,Q71MB6,Q80W57,Q8R431,Q923S2,Q99MA2,Q9JJ40,Q9QX74,Q9WTW7,Q9WUW8,Q9WUW9,Q9Z0V6,Q9Z0W7 |
| 1421 | 1,2,4,5,7,8<br>,11,12 | 3,6,9,10,1<br>3,14,15,16 | 32 iRT-Kit_WR_fusion,P02780,P02781,P02782,P04905,P06760,P06911,P07150,P08649,P08723,P22282,P27590,P31430,P36374,P40241,P47967,Q10758,Q4FZU2,Q4G075,Q5GRG2,Q5I0D1,Q5M8C6,Q63493,Q66H69,Q6IFU8,Q6IMF3,Q6P6Q2,Q6TMA8,Q8CIZ5,Q9JHB9,Q9QX74,Q9R0T3                                                                                                                    |
| 1422 | 1,2,4,5,7,8<br>,11,13 | 3,6,9,10,1<br>2,14,15,16 | 31 D4A5U3,P02780,P02781,P02782,P06760,P08649,P08723,P09456,P18418,P19223,P22273,P22282,P22283,P31430,P36374,P40241,P47967,Q10758,Q4FZU2,Q4G075,Q63493,Q66H69,Q6IFU8,Q6IMF3,Q6P6Q2,Q6TMA8,Q8CIZ5,Q9JHB9,Q9JI85,Q9QX74,Q9WTT6                                                                                                                                      |
| 1423 | 1,2,4,5,7,8<br>,11,14 | 3,6,9,10,1<br>2,13,15,16 | 31 D4A5U3,P02780,P02781,P02782,P06760,P07150,P08649,P08723,P09456,P19223,P20646,P20760,P31430,P36374,P40241,P50280,Q10758,Q4FZU2,Q4G075,Q5GRG2,Q62635,Q63493,Q66H69,Q6IFU8,Q6IMF3,Q6P6Q2,Q6TMA8,Q8CIZ5,Q9JHB9,Q9QX74,Q9WTT6                                                                                                                                      |
| 1424 | 1,2,4,5,7,8<br>,11,15 | 3,6,9,10,1<br>2,13,14,16 | 26 P02780,P02781,P06760,P08649,P08723,P20646,P36374,P40241,P50280,Q10758,Q4FZU2,Q4G075,Q63493,Q66H69,Q6IFU8,Q6IFW6,Q6IMF3,Q6P6Q2,Q6TMA8,Q8CIZ5,Q8CJ52,Q9JHB9,Q9QX74,Q9WTT6,Q9Z0V6,Q9Z1F2                                                                                                                                                                         |
| 1425 | 1,2,4,5,7,8<br>,11,16 | 3,6,9,10,1<br>2,13,14,15 | 44 D4A5U3,O35547,P02761,P02780,P02781,P02782,P04905,P06760,P07150,P07647,P08010,P08649,P08723,P09456,P0C0A9,P18418,P19223,P20646,P20760,P20762,P22273,P22282,P22283,P30120,P36374,P40241,P46462,P50280,Q00715,Q10758,Q4FZU2,Q4G075,Q5M8C6,Q63493,Q66H69,Q6IFU8,Q6IMF3,Q6P6Q2,Q6TMA8,Q812E4,Q8R5M3,Q9JHB9,Q9QX74,Q9Z0J6                                           |
| 1426 | 1,2,4,5,7,8<br>,12,13 | 3,6,9,10,1<br>1,14,15,16 | 14 D4A5U3,iRT-Kit_WR_fusion,P06760,P19223,P19814,P36860,P47967,P80299,P98089,Q4G075,Q66H69,Q6TMA8,Q8CIZ5,Q9Z1F2                                                                                                                                                                                                                                                  |
| 1427 | 1,2,4,5,7,8<br>,12,14 | 3,6,9,10,1<br>1,13,15,16 | 11 D3ZHA0,P06760,P19814,P20760,Q4G075,Q5RLM2,Q62635,Q66H69,Q6TMA8,Q8CIZ5,Q9Z1F2                                                                                                                                                                                                                                                                                  |
| 1428 | 1,2,4,5,7,8<br>,12,15 | 3,6,9,10,1<br>1,13,14,16 | 10 iRT-Kit_WR_fusion,P19132,P19814,P20646,Q66H69,Q6TMA8,Q8CIZ5,Q9QX74,Q9Z0V6,Q9Z1F2                                                                                                                                                                                                                                                                              |
| 1429 | 1,2,4,5,7,8<br>,12,16 | 3,6,9,10,1<br>1,13,14,15 | 12 iRT-Kit_WR_fusion,P02781,P07647,P18418,P20646,P20760,P20762,Q4G075,Q5RLM2,Q66H69,Q6TMA8,Q9JHB9                                                                                                                                                                                                                                                                |
| 1430 | 1,2,4,5,7,8<br>,13,14 | 3,6,9,10,1<br>1,12,15,16 | 17 B0BNN3,D3ZHA0,D4A5U3,P06760,P08649,P19223,P20646,P20760,P25809,Q4G075,Q62635,Q66H69,Q6PCU2,Q6TMA8,Q8CIZ5,Q9WUW8,Q9Z1F2                                                                                                                                                                                                                                        |
| 1431 | 1,2,4,5,7,8<br>,13,15 | 3,6,9,10,1<br>1,12,14,16 | 15 P06760,P19132,P19223,P20646,P36860,Q4G075,Q63618,Q66H69,Q6PCU2,Q6Q0N1,Q6TMA8,Q8CIZ5,Q9QX74,Q9Z0V6,Q9Z1F2                                                                                                                                                                                                                                                      |

|      |                       |                          |    |                                                                                                                                                                   |
|------|-----------------------|--------------------------|----|-------------------------------------------------------------------------------------------------------------------------------------------------------------------|
| 1432 | 1,2,4,5,7,8<br>,13,16 | 3,6,9,10,1<br>1,12,14,15 | 20 | B0BNN3,D3ZHA0,D4A5U3,P02761,P02781,P02782,P07647,P08649,P18418,P19223,P20646,P20760,P46844,Q4G075,Q63618,Q66H69,Q6TMA8,Q8CIZ5,Q9WUW8,Q9Z0J6                       |
| 1433 | 1,2,4,5,7,8<br>,14,15 | 3,6,9,10,1<br>1,12,13,16 | 15 | P06760,P08649,P19132,P20646,P20760,P20762,P54921,Q4G075,Q62635,Q6PCU2,Q6TMA8,Q8CIZ5,Q9QX74,Q9Z0V6,Q9Z1F2                                                          |
| 1434 | 1,2,4,5,7,8<br>,14,16 | 3,6,9,10,1<br>1,12,13,15 | 16 | D3ZHA0,D4A5U3,P02761,P02781,P06760,P08649,P19223,P20646,P20760,P20762,Q4G075,Q5RLM2,Q62635,Q6TMA8,Q9QX74,Q9WUW8                                                   |
| 1435 | 1,2,4,5,7,8<br>,15,16 | 3,6,9,10,1<br>1,12,13,14 | 23 | B2RYW9,O70594,P02761,P02781,P08649,P17988,P19132,P19223,P19468,P20646,P20760,P207623,P46844,P48508,Q4G075,Q63270,Q66H69,Q6PCU2,Q6Q0N1,Q6TMA8,Q8R431,Q9QX74,Q9Z0V6 |
| 1436 | 1,2,4,5,7,9<br>,10,11 | 3,6,8,12,1<br>3,14,15,16 |    | 2 P70549,Q9R168                                                                                                                                                   |
| 1437 | 1,2,4,5,7,9<br>,10,12 | 3,6,8,11,1<br>3,14,15,16 |    | 4 P36860,P80299,Q03191,Q9Z1F2                                                                                                                                     |
| 1438 | 1,2,4,5,7,9<br>,10,13 | 3,6,8,11,1<br>2,14,15,16 |    | 4 P36860,P80299,Q9QZK9,Q9Z1F2                                                                                                                                     |
| 1439 | 1,2,4,5,7,9<br>,10,14 | 3,6,8,11,1<br>2,13,15,16 |    | 3 P00762,Q9R168,Q9Z1F2                                                                                                                                            |
| 1440 | 1,2,4,5,7,9<br>,10,15 | 3,6,8,11,1<br>2,13,14,16 |    | 3 P00762,P36860,Q9Z1F2                                                                                                                                            |
| 1441 | 1,2,4,5,7,9<br>,10,16 | 3,6,8,11,1<br>2,13,14,15 |    | 1 Q9R168                                                                                                                                                          |
| 1442 | 1,2,4,5,7,9<br>,11,12 | 3,6,8,10,1<br>3,14,15,16 |    | 1 Q03191                                                                                                                                                          |
| 1443 | 1,2,4,5,7,9<br>,11,13 | 3,6,8,10,1<br>2,14,15,16 |    | 2 P80299,Q9R168                                                                                                                                                   |
| 1444 | 1,2,4,5,7,9<br>,11,14 | 3,6,8,10,1<br>2,13,15,16 |    | 3 P08649,P70549,Q9R168                                                                                                                                            |
| 1445 | 1,2,4,5,7,9<br>,11,15 | 3,6,8,10,1<br>2,13,14,16 |    | 3 P08649,Q6P6Q2,Q8CJ52                                                                                                                                            |
| 1446 | 1,2,4,5,7,9<br>,11,16 | 3,6,8,10,1<br>2,13,14,15 |    | 5 P07647,P08649,P70549,Q9R168,Q9Z0J6                                                                                                                              |
| 1447 | 1,2,4,5,7,9<br>,12,13 | 3,6,8,10,1<br>1,14,15,16 |    | 2 P80299,Q03191                                                                                                                                                   |
| 1448 | 1,2,4,5,7,9<br>,12,14 | 3,6,8,10,1<br>1,13,15,16 |    | 1 Q03191                                                                                                                                                          |
| 1449 | 1,2,4,5,7,9<br>,12,15 | 3,6,8,10,1<br>1,13,14,16 |    | 1 Q03191                                                                                                                                                          |
| 1450 | 1,2,4,5,7,9<br>,12,16 | 3,6,8,10,1<br>1,13,14,15 |    | 1 Q03191                                                                                                                                                          |
| 1451 | 1,2,4,5,7,9<br>,13,14 | 3,6,8,10,1<br>1,12,15,16 |    | 2 P80299,Q9R168                                                                                                                                                   |

|      |                        |                          |    |                                                                                            |
|------|------------------------|--------------------------|----|--------------------------------------------------------------------------------------------|
| 1452 | 1,2,4,5,7,9<br>,13,15  | 3,6,8,10,1<br>1,12,14,16 | 2  | P36860,P80299                                                                              |
| 1453 | 1,2,4,5,7,9<br>,13,16  | 3,6,8,10,1<br>1,12,14,15 | 4  | P80299,Q9EQS0,Q9R168,Q9Z0J6                                                                |
| 1454 | 1,2,4,5,7,9<br>,14,15  | 3,6,8,10,1<br>1,12,13,16 | 1  | P02625                                                                                     |
| 1455 | 1,2,4,5,7,9<br>,14,16  | 3,6,8,10,1<br>1,12,13,15 | 1  | Q9R168                                                                                     |
| 1456 | 1,2,4,5,7,9<br>,15,16  | 3,6,8,10,1<br>1,12,13,14 | 0  |                                                                                            |
| 1457 | 1,2,4,5,7,1<br>0,11,12 | 3,6,8,9,13,<br>14,15,16  | 3  | P47967,P97840,Q5I0D1                                                                       |
| 1458 | 1,2,4,5,7,1<br>0,11,13 | 3,6,8,9,12,<br>14,15,16  | 3  | P36860,P47967,P80299                                                                       |
| 1459 | 1,2,4,5,7,1<br>0,11,14 | 3,6,8,9,12,<br>13,15,16  | 0  |                                                                                            |
| 1460 | 1,2,4,5,7,1<br>0,11,15 | 3,6,8,9,12,<br>13,14,16  | 3  | P17988,Q4FZU2,Q6P6Q2                                                                       |
| 1461 | 1,2,4,5,7,1<br>0,11,16 | 3,6,8,9,12,<br>13,14,15  | 4  | P07647,P17988,P70549,Q9JHB9                                                                |
| 1462 | 1,2,4,5,7,1<br>0,12,13 | 3,6,8,9,11,<br>14,15,16  | 6  | P19814,P36860,P47967,P80299,P97840,Q9Z1F2                                                  |
| 1463 | 1,2,4,5,7,1<br>0,12,14 | 3,6,8,9,11,<br>13,15,16  | 2  | Q5RLM2,Q9Z1F2                                                                              |
| 1464 | 1,2,4,5,7,1<br>0,12,15 | 3,6,8,9,11,<br>13,14,16  | 5  | P09527,P10758,P19814,P36860,Q9Z1F2                                                         |
| 1465 | 1,2,4,5,7,1<br>0,12,16 | 3,6,8,9,11,<br>13,14,15  | 4  | P09527,P0DMW0,P0DMW1,P10758,Q5RLM2                                                         |
| 1466 | 1,2,4,5,7,1<br>0,13,14 | 3,6,8,9,11,<br>12,15,16  | 5  | A2RUW1,P09527,P80299,Q9WUW8,Q9Z1F2                                                         |
| 1467 | 1,2,4,5,7,1<br>0,13,15 | 3,6,8,9,11,<br>12,14,16  | 6  | A2RUW1,P09527,P36860,P80299,Q63618,Q9Z1F2                                                  |
| 1468 | 1,2,4,5,7,1<br>0,13,16 | 3,6,8,9,11,<br>12,14,15  | 6  | P09527,P19468,P80299,Q63618,Q6AYQ8,Q9WUW8                                                  |
| 1469 | 1,2,4,5,7,1<br>0,14,15 | 3,6,8,9,11,<br>12,13,16  | 4  | A2RUW1,P09527,P54921,Q9Z1F2                                                                |
| 1470 | 1,2,4,5,7,1<br>0,14,16 | 3,6,8,9,11,<br>12,13,15  | 6  | P02761,P09527,Q5RLM2,Q71MB6,Q9QYP1,Q9WUW8                                                  |
| 1471 | 1,2,4,5,7,1<br>0,15,16 | 3,6,8,9,11,<br>12,13,14  | 13 | P09527,P10758,P17988,P18297,P19468,P48508,Q5I0E9,Q63424,Q63618,Q64093,Q71MB6,Q8R431,Q9QYP1 |

|      |                        |                         |                                                           |
|------|------------------------|-------------------------|-----------------------------------------------------------|
| 1472 | 1,2,4,5,7,1<br>1,12,13 | 3,6,8,9,10,<br>14,15,16 | 4 P47967,P80299,P97840,Q5I0D1                             |
| 1473 | 1,2,4,5,7,1<br>1,12,14 | 3,6,8,9,10,<br>13,15,16 | 0                                                         |
| 1474 | 1,2,4,5,7,1<br>1,12,15 | 3,6,8,9,10,<br>13,14,16 | 2 Q4FZU2,Q6P6Q2                                           |
| 1475 | 1,2,4,5,7,1<br>1,12,16 | 3,6,8,9,10,<br>13,14,15 | 5 P02781,P07647,P36374,P97840,Q9JHB9                      |
| 1476 | 1,2,4,5,7,1<br>1,13,14 | 3,6,8,9,10,<br>12,15,16 | 1 P08649                                                  |
| 1477 | 1,2,4,5,7,1<br>1,13,15 | 3,6,8,9,10,<br>12,14,16 | 2 Q4FZU2,Q6P6Q2                                           |
| 1478 | 1,2,4,5,7,1<br>1,13,16 | 3,6,8,9,10,<br>12,14,15 | 8 P02761,P02781,P02782,P07647,P08649,Q6AYQ8,Q9EQS0,Q9Z0J6 |
| 1479 | 1,2,4,5,7,1<br>1,14,15 | 3,6,8,9,10,<br>12,13,16 | 5 P08649,Q4FZU2,Q6IFU8,Q6P6Q2,Q8CJ52                      |
| 1480 | 1,2,4,5,7,1<br>1,14,16 | 3,6,8,9,10,<br>12,13,15 | 7 P02761,P07647,P08649,P70549,Q4KLZ6,Q9JHB9,Q9R168        |
| 1481 | 1,2,4,5,7,1<br>1,15,16 | 3,6,8,9,10,<br>12,13,14 | 8 P07647,P08649,P17988,Q4FZU2,Q6IFU8,Q6P6Q2,Q8CJ52,Q9Z0J6 |
| 1482 | 1,2,4,5,7,1<br>2,13,14 | 3,6,8,9,10,<br>11,15,16 | 1 P80299                                                  |
| 1483 | 1,2,4,5,7,1<br>2,13,15 | 3,6,8,9,10,<br>11,14,16 | 3 P19814,P36860,P80299                                    |
| 1484 | 1,2,4,5,7,1<br>2,13,16 | 3,6,8,9,10,<br>11,14,15 | 2 P80299,P97840                                           |
| 1485 | 1,2,4,5,7,1<br>2,14,15 | 3,6,8,9,10,<br>11,13,16 | 1 P19814                                                  |
| 1486 | 1,2,4,5,7,1<br>2,14,16 | 3,6,8,9,10,<br>11,13,15 | 1 Q5RLM2                                                  |
| 1487 | 1,2,4,5,7,1<br>2,15,16 | 3,6,8,9,10,<br>11,13,14 | 2 P10758,P17988                                           |
| 1488 | 1,2,4,5,7,1<br>3,14,15 | 3,6,8,9,10,<br>11,12,16 | 1 A2RUW1                                                  |
| 1489 | 1,2,4,5,7,1<br>3,14,16 | 3,6,8,9,10,<br>11,12,15 | 3 B0BNN3,P02761,Q9WUW8                                    |
| 1490 | 1,2,4,5,7,1<br>3,15,16 | 3,6,8,9,10,<br>11,12,14 | 2 P02761,Q6AYQ8                                           |
| 1491 | 1,2,4,5,7,1<br>4,15,16 | 3,6,8,9,10,<br>11,12,13 | 3 P02761,P09527,P17988                                    |

|      |                       |                          |                                                                  |
|------|-----------------------|--------------------------|------------------------------------------------------------------|
| 1492 | 1,2,4,5,8,9<br>,10,11 | 3,6,7,12,1<br>3,14,15,16 | 4 P70545,P70549,Q10758,Q6IFU8                                    |
| 1493 | 1,2,4,5,8,9<br>,10,12 | 3,6,7,11,1<br>3,14,15,16 | 1 Q03191                                                         |
| 1494 | 1,2,4,5,8,9<br>,10,13 | 3,6,7,11,1<br>2,14,15,16 | 1 P20760                                                         |
| 1495 | 1,2,4,5,8,9<br>,10,14 | 3,6,7,11,1<br>2,13,15,16 | 1 P20760                                                         |
| 1496 | 1,2,4,5,8,9<br>,10,15 | 3,6,7,11,1<br>2,13,14,16 | 2 P19132,P20760                                                  |
| 1497 | 1,2,4,5,8,9<br>,10,16 | 3,6,7,11,1<br>2,13,14,15 | 3 P20760,P70545,Q30KJ2                                           |
| 1498 | 1,2,4,5,8,9<br>,11,12 | 3,6,7,10,1<br>3,14,15,16 | 3 Q03191,Q5RKI1,Q6IFU8                                           |
| 1499 | 1,2,4,5,8,9<br>,11,13 | 3,6,7,10,1<br>2,14,15,16 | 3 Q10758,Q5RKI1,Q6IFU8                                           |
| 1500 | 1,2,4,5,8,9<br>,11,14 | 3,6,7,10,1<br>2,13,15,16 | 4 P20760,P70549,Q5RKI1,Q6IFU8                                    |
| 1501 | 1,2,4,5,8,9<br>,11,15 | 3,6,7,10,1<br>2,13,14,16 | 6 Q10758,Q4FZU2,Q6IFU8,Q6IFW6,Q6IMF3,Q6P6Q2                      |
| 1502 | 1,2,4,5,8,9<br>,11,16 | 3,6,7,10,1<br>2,13,14,15 | 9 O88797,P02782,P20760,P60905,P70549,Q10758,Q5RKI1,Q6IFU8,Q812E4 |
| 1503 | 1,2,4,5,8,9<br>,12,13 | 3,6,7,10,1<br>1,14,15,16 | 2 Q03191,Q5RKI1                                                  |
| 1504 | 1,2,4,5,8,9<br>,12,14 | 3,6,7,10,1<br>1,13,15,16 | 3 P20760,Q03191,Q5RKI1                                           |
| 1505 | 1,2,4,5,8,9<br>,12,15 | 3,6,7,10,1<br>1,13,14,16 | 2 P19132,P36376                                                  |
| 1506 | 1,2,4,5,8,9<br>,12,16 | 3,6,7,10,1<br>1,13,14,15 | 3 P20760,Q03191,Q5RKI1                                           |
| 1507 | 1,2,4,5,8,9<br>,13,14 | 3,6,7,10,1<br>1,12,15,16 | 2 P20760,Q5RKI1                                                  |
| 1508 | 1,2,4,5,8,9<br>,13,15 | 3,6,7,10,1<br>1,12,14,16 | 1 P19132                                                         |
| 1509 | 1,2,4,5,8,9<br>,13,16 | 3,6,7,10,1<br>1,12,14,15 | 2 P20760,Q5RKI1                                                  |
| 1510 | 1,2,4,5,8,9<br>,14,15 | 3,6,7,10,1<br>1,12,13,16 | 2 P19132,P20760                                                  |
| 1511 | 1,2,4,5,8,9<br>,14,16 | 3,6,7,10,1<br>1,12,13,15 | 3 P20760,P23593,Q5RKI1                                           |

|      |                        |                          |    |                                                                                         |
|------|------------------------|--------------------------|----|-----------------------------------------------------------------------------------------|
| 1512 | 1,2,4,5,8,9<br>,15,16  | 3,6,7,10,1<br>1,12,13,14 | 2  | P20760,P23593                                                                           |
| 1513 | 1,2,4,5,8,1<br>0,11,12 | 3,6,7,9,13,<br>14,15,16  | 3  | Q10758,Q66H69,Q6IFU8                                                                    |
| 1514 | 1,2,4,5,8,1<br>0,11,13 | 3,6,7,9,12,<br>14,15,16  | 3  | Q10758,Q66H69,Q6IFU8                                                                    |
| 1515 | 1,2,4,5,8,1<br>0,11,14 | 3,6,7,9,12,<br>13,15,16  | 2  | Q10758,Q6IFU8                                                                           |
| 1516 | 1,2,4,5,8,1<br>0,11,15 | 3,6,7,9,12,<br>13,14,16  | 7  | Q10758,Q4FZU2,Q6IFU7,Q6IFU8,Q6IFW6,Q6IMF3,Q6P6Q2                                        |
| 1517 | 1,2,4,5,8,1<br>0,11,16 | 3,6,7,9,12,<br>13,14,15  | 7  | P02782,P04905,P70549,Q10758,Q30KJ2,Q6IFU8,Q6P6Q2                                        |
| 1518 | 1,2,4,5,8,1<br>0,12,13 | 3,6,7,9,11,<br>14,15,16  | 2  | P19814,Q66H69                                                                           |
| 1519 | 1,2,4,5,8,1<br>0,12,14 | 3,6,7,9,11,<br>13,15,16  | 1  | Q5RLM2                                                                                  |
| 1520 | 1,2,4,5,8,1<br>0,12,15 | 3,6,7,9,11,<br>13,14,16  | 4  | P19132,P19814,P34901,Q498D9                                                             |
| 1521 | 1,2,4,5,8,1<br>0,12,16 | 3,6,7,9,11,<br>13,14,15  | 3  | O88267,P0DMW0,P0DMW1,Q30KJ2                                                             |
| 1522 | 1,2,4,5,8,1<br>0,13,14 | 3,6,7,9,11,<br>12,15,16  | 1  | Q9WUW8                                                                                  |
| 1523 | 1,2,4,5,8,1<br>0,13,15 | 3,6,7,9,11,<br>12,14,16  | 4  | P19132,P36860,Q498D9,Q63618                                                             |
| 1524 | 1,2,4,5,8,1<br>0,13,16 | 3,6,7,9,11,<br>12,14,15  | 2  | Q30KJ2,Q63618                                                                           |
| 1525 | 1,2,4,5,8,1<br>0,14,15 | 3,6,7,9,11,<br>12,13,16  | 3  | P19132,P20762,P54921                                                                    |
| 1526 | 1,2,4,5,8,1<br>0,14,16 | 3,6,7,9,11,<br>12,13,15  | 5  | P20760,P20762,P97580,Q30KJ2,Q9WUW8                                                      |
| 1527 | 1,2,4,5,8,1<br>0,15,16 | 3,6,7,9,11,<br>12,13,14  | 5  | O88267,P20762,Q30KJ2,Q63618,Q8R431                                                      |
| 1528 | 1,2,4,5,8,1<br>1,12,13 | 3,6,7,9,10,<br>14,15,16  | 4  | Q10758,Q5RKI1,Q66H69,Q6IFU8                                                             |
| 1529 | 1,2,4,5,8,1<br>1,12,14 | 3,6,7,9,10,<br>13,15,16  | 2  | Q5RKI1,Q6IFU8                                                                           |
| 1530 | 1,2,4,5,8,1<br>1,12,15 | 3,6,7,9,10,<br>13,14,16  | 7  | Q10758,Q4FZU2,Q6IFU8,Q6IFW6,Q6IG05,Q6IMF3,Q6P6Q2                                        |
| 1531 | 1,2,4,5,8,1<br>1,12,16 | 3,6,7,9,10,<br>13,14,15  | 12 | O35547,P02781,P02782,P04905,P07647,P30120,P36374,Q10758,Q5RKI1,Q6IFU8,Q6P6Q2,Q9JH<br>B9 |



|      |                        |                         |    |                                                                       |
|------|------------------------|-------------------------|----|-----------------------------------------------------------------------|
| 1532 | 1,2,4,5,8,1<br>1,13,14 | 3,6,7,9,10,<br>12,15,16 | 4  | O54728,Q10758,Q5RKI1,Q6IFU8                                           |
| 1533 | 1,2,4,5,8,1<br>1,13,15 | 3,6,7,9,10,<br>12,14,16 | 8  | Q10758,Q4FZU2,Q6IFU7,Q6IFU8,Q6IFW6,Q6IG02,Q6IMF3,Q6P6Q2               |
| 1534 | 1,2,4,5,8,1<br>1,13,16 | 3,6,7,9,10,<br>12,14,15 | 10 | P02781,P02782,P07647,P09456,P30120,P60905,Q10758,Q5RKI1,Q6IFU8,Q6P6Q2 |
| 1535 | 1,2,4,5,8,1<br>1,14,15 | 3,6,7,9,10,<br>12,13,16 | 7  | Q10758,Q4FZU2,Q6IFU7,Q6IFU8,Q6IFW6,Q6IMF3,Q6P6Q2                      |
| 1536 | 1,2,4,5,8,1<br>1,14,16 | 3,6,7,9,10,<br>12,13,15 | 10 | O54728,P02781,P02782,P30120,P70549,Q10758,Q4KLZ6,Q5RKI1,Q6IFU8,Q6P6Q2 |
| 1537 | 1,2,4,5,8,1<br>1,15,16 | 3,6,7,9,10,<br>12,13,14 | 8  | P02782,Q10758,Q4FZU2,Q6IFU7,Q6IFU8,Q6IFW6,Q6IMF3,Q6P6Q2               |
| 1538 | 1,2,4,5,8,1<br>2,13,14 | 3,6,7,9,10,<br>11,15,16 | 1  | Q5RKI1                                                                |
| 1539 | 1,2,4,5,8,1<br>2,13,15 | 3,6,7,9,10,<br>11,14,16 | 2  | P19132,P19814                                                         |
| 1540 | 1,2,4,5,8,1<br>2,13,16 | 3,6,7,9,10,<br>11,14,15 | 1  | Q5RKI1                                                                |
| 1541 | 1,2,4,5,8,1<br>2,14,15 | 3,6,7,9,10,<br>11,13,16 | 1  | P19132                                                                |
| 1542 | 1,2,4,5,8,1<br>2,14,16 | 3,6,7,9,10,<br>11,13,15 | 1  | Q5RKI1                                                                |
| 1543 | 1,2,4,5,8,1<br>2,15,16 | 3,6,7,9,10,<br>11,13,14 | 0  |                                                                       |
| 1544 | 1,2,4,5,8,1<br>3,14,15 | 3,6,7,9,10,<br>11,12,16 | 0  |                                                                       |
| 1545 | 1,2,4,5,8,1<br>3,14,16 | 3,6,7,9,10,<br>11,12,15 | 5  | B0BNN3,O54728,P20760,Q5RKI1,Q9WUW8                                    |
| 1546 | 1,2,4,5,8,1<br>3,15,16 | 3,6,7,9,10,<br>11,12,14 | 1  | P01015                                                                |
| 1547 | 1,2,4,5,8,1<br>4,15,16 | 3,6,7,9,10,<br>11,12,13 | 2  | P20760,P20762                                                         |
| 1548 | 1,2,4,5,9,1<br>0,11,12 | 3,6,7,8,13,<br>14,15,16 | 3  | P70549,Q03191,Q62714                                                  |
| 1549 | 1,2,4,5,9,1<br>0,11,13 | 3,6,7,8,12,<br>14,15,16 | 0  |                                                                       |
| 1550 | 1,2,4,5,9,1<br>0,11,14 | 3,6,7,8,12,<br>13,15,16 | 1  | P70549                                                                |
| 1551 | 1,2,4,5,9,1<br>0,11,15 | 3,6,7,8,12,<br>13,14,16 | 0  |                                                                       |

|      |                        |                         |                                                    |
|------|------------------------|-------------------------|----------------------------------------------------|
| 1552 | 1,2,4,5,9,1<br>0,11,16 | 3,6,7,8,12,<br>13,14,15 | 3 D3ZUC6,P70549,Q9Z2L0                             |
| 1553 | 1,2,4,5,9,1<br>0,12,13 | 3,6,7,8,11,<br>14,15,16 | 2 Q03191,Q9QZK9                                    |
| 1554 | 1,2,4,5,9,1<br>0,12,14 | 3,6,7,8,11,<br>13,15,16 | 1 Q03191                                           |
| 1555 | 1,2,4,5,9,1<br>0,12,15 | 3,6,7,8,11,<br>13,14,16 | 3 P30120,Q03191,Q99041                             |
| 1556 | 1,2,4,5,9,1<br>0,12,16 | 3,6,7,8,11,<br>13,14,15 | 2 D3ZUC6,Q03191                                    |
| 1557 | 1,2,4,5,9,1<br>0,13,14 | 3,6,7,8,11,<br>12,15,16 | 2 Q9QW07,Q9QZK9                                    |
| 1558 | 1,2,4,5,9,1<br>0,13,15 | 3,6,7,8,11,<br>12,14,16 | 2 Q8CFN2,Q9QZK9                                    |
| 1559 | 1,2,4,5,9,1<br>0,13,16 | 3,6,7,8,11,<br>12,14,15 | 2 D3ZUC6,P11883                                    |
| 1560 | 1,2,4,5,9,1<br>0,14,15 | 3,6,7,8,11,<br>12,13,16 | 1 P30120                                           |
| 1561 | 1,2,4,5,9,1<br>0,14,16 | 3,6,7,8,11,<br>12,13,15 | 0                                                  |
| 1562 | 1,2,4,5,9,1<br>0,15,16 | 3,6,7,8,11,<br>12,13,14 | 1 D3ZUC6                                           |
| 1563 | 1,2,4,5,9,1<br>1,12,13 | 3,6,7,8,10,<br>14,15,16 | 4 O35077,Q03191,Q5RKI1,Q62761;Q62762;Q62763        |
| 1564 | 1,2,4,5,9,1<br>1,12,14 | 3,6,7,8,10,<br>13,15,16 | 5 O35077,P70549,Q03191,Q5RKI1,Q62761;Q62762;Q62763 |
| 1565 | 1,2,4,5,9,1<br>1,12,15 | 3,6,7,8,10,<br>13,14,16 | 3 O35077,Q03191,Q62761;Q62762;Q62763               |
| 1566 | 1,2,4,5,9,1<br>1,12,16 | 3,6,7,8,10,<br>13,14,15 | 3 P70549,Q03191,Q5RKI1                             |
| 1567 | 1,2,4,5,9,1<br>1,13,14 | 3,6,7,8,10,<br>12,15,16 | 2 P0DMW0;P0DMW1,Q5RKI1                             |
| 1568 | 1,2,4,5,9,1<br>1,13,15 | 3,6,7,8,10,<br>12,14,16 | 1 O70417                                           |
| 1569 | 1,2,4,5,9,1<br>1,13,16 | 3,6,7,8,10,<br>12,14,15 | 4 D3ZUC6,O70417,Q5RKI1,Q9EQS0                      |
| 1570 | 1,2,4,5,9,1<br>1,14,15 | 3,6,7,8,10,<br>12,13,16 | 0                                                  |
| 1571 | 1,2,4,5,9,1<br>1,14,16 | 3,6,7,8,10,<br>12,13,15 | 4 P70549,Q4KLZ6,Q5RKI1,Q9R168                      |

|      |                         |                         |                        |
|------|-------------------------|-------------------------|------------------------|
| 1572 | 1,2,4,5,9,1<br>1,15,16  | 3,6,7,8,10,<br>12,13,14 | 2 O70417,P70549        |
| 1573 | 1,2,4,5,9,1<br>2,13,14  | 3,6,7,8,10,<br>11,15,16 | 3 Q03191,Q5RKI1,Q9QZK9 |
| 1574 | 1,2,4,5,9,1<br>2,13,15  | 3,6,7,8,10,<br>11,14,16 | 1 Q03191               |
| 1575 | 1,2,4,5,9,1<br>2,13,16  | 3,6,7,8,10,<br>11,14,15 | 2 Q03191,Q5RKI1        |
| 1576 | 1,2,4,5,9,1<br>2,14,15  | 3,6,7,8,10,<br>11,13,16 | 1 Q03191               |
| 1577 | 1,2,4,5,9,1<br>2,14,16  | 3,6,7,8,10,<br>11,13,15 | 2 Q03191,Q5RKI1        |
| 1578 | 1,2,4,5,9,1<br>2,15,16  | 3,6,7,8,10,<br>11,13,14 | 2 Q03191,Q99041        |
| 1579 | 1,2,4,5,9,1<br>3,14,15  | 3,6,7,8,10,<br>11,12,16 | 0                      |
| 1580 | 1,2,4,5,9,1<br>3,14,16  | 3,6,7,8,10,<br>11,12,15 | 2 Q5RKI1,Q9EQS0        |
| 1581 | 1,2,4,5,9,1<br>3,15,16  | 3,6,7,8,10,<br>11,12,14 | 1 O70417               |
| 1582 | 1,2,4,5,9,1<br>4,15,16  | 3,6,7,8,10,<br>11,12,13 | 0                      |
| 1583 | 1,2,4,5,10,<br>11,12,13 | 3,6,7,8,9,1<br>4,15,16  | 1 P35280               |
| 1584 | 1,2,4,5,10,<br>11,12,14 | 3,6,7,8,9,1<br>3,15,16  | 1 P35280               |
| 1585 | 1,2,4,5,10,<br>11,12,15 | 3,6,7,8,9,1<br>3,14,16  | 0                      |
| 1586 | 1,2,4,5,10,<br>11,12,16 | 3,6,7,8,9,1<br>3,14,15  | 2 P35280,P70549        |
| 1587 | 1,2,4,5,10,<br>11,13,14 | 3,6,7,8,9,1<br>2,15,16  | 1 P35280               |
| 1588 | 1,2,4,5,10,<br>11,13,15 | 3,6,7,8,9,1<br>2,14,16  | 2 O70417,P21674        |
| 1589 | 1,2,4,5,10,<br>11,13,16 | 3,6,7,8,9,1<br>2,14,15  | 2 O70417,P35280        |
| 1590 | 1,2,4,5,10,<br>11,14,15 | 3,6,7,8,9,1<br>2,13,16  | 0                      |
| 1591 | 1,2,4,5,10,<br>11,14,16 | 3,6,7,8,9,1<br>2,13,15  | 3 P35280,P70549,Q4KLZ6 |

|      |                                             |                               |
|------|---------------------------------------------|-------------------------------|
| 1592 | 1,2,4,5,10, 3,6,7,8,9,1<br>11,15,16 2,13,14 | 2 O70417,P17988               |
| 1593 | 1,2,4,5,10, 3,6,7,8,9,1<br>12,13,14 1,15,16 | 2 P35280,Q6P6S4               |
| 1594 | 1,2,4,5,10, 3,6,7,8,9,1<br>12,13,15 1,14,16 | 2 P35280,Q812E4               |
| 1595 | 1,2,4,5,10, 3,6,7,8,9,1<br>12,13,16 1,14,15 | 1 P35280                      |
| 1596 | 1,2,4,5,10, 3,6,7,8,9,1<br>12,14,15 1,13,16 | 1 P35280                      |
| 1597 | 1,2,4,5,10, 3,6,7,8,9,1<br>12,14,16 1,13,15 | 1 P35280                      |
| 1598 | 1,2,4,5,10, 3,6,7,8,9,1<br>12,15,16 1,13,14 | 3 P0DMW0;P0DMW1,P10758,P35280 |
| 1599 | 1,2,4,5,10, 3,6,7,8,9,1<br>13,14,15 1,12,16 | 1 P35280                      |
| 1600 | 1,2,4,5,10, 3,6,7,8,9,1<br>13,14,16 1,12,15 | 3 P09527,P35280,Q6P6S4        |
| 1601 | 1,2,4,5,10, 3,6,7,8,9,1<br>13,15,16 1,12,14 | 4 O70417,P09527,P11883,P35280 |
| 1602 | 1,2,4,5,10, 3,6,7,8,9,1<br>14,15,16 1,12,13 | 3 P09527,P35280,Q9QYP1        |
| 1603 | 1,2,4,5,11, 3,6,7,8,9,1<br>12,13,14 0,15,16 | 2 P35280,Q5RKI1               |
| 1604 | 1,2,4,5,11, 3,6,7,8,9,1<br>12,13,15 0,14,16 | 1 O70417                      |
| 1605 | 1,2,4,5,11, 3,6,7,8,9,1<br>12,13,16 0,14,15 | 3 O70417,P35280,Q5RKI1        |
| 1606 | 1,2,4,5,11, 3,6,7,8,9,1<br>12,14,15 0,13,16 | 0                             |
| 1607 | 1,2,4,5,11, 3,6,7,8,9,1<br>12,14,16 0,13,15 | 3 P35280,Q4KLZ6,Q5RKI1        |
| 1608 | 1,2,4,5,11, 3,6,7,8,9,1<br>12,15,16 0,13,14 | 2 O70417,Q5QE79               |
| 1609 | 1,2,4,5,11, 3,6,7,8,9,1<br>13,14,15 0,12,16 | 0                             |
| 1610 | 1,2,4,5,11, 3,6,7,8,9,1<br>13,14,16 0,12,15 | 4 O54728,P35280,Q4KLZ6,Q5RKI1 |
| 1611 | 1,2,4,5,11, 3,6,7,8,9,1<br>13,15,16 0,12,14 | 1 O70417                      |

|      |                                                 |    |                                                                                                                                                                                                                                                                                                                                                                                                                                                                                                                                                                                                                                                                                                                                                                                                                                                                                                                                                                                                                                                                                                                                                                                                                                                                                                                                                                                                                                                                                                                                                                                                                                                                                                                                                                                                      |
|------|-------------------------------------------------|----|------------------------------------------------------------------------------------------------------------------------------------------------------------------------------------------------------------------------------------------------------------------------------------------------------------------------------------------------------------------------------------------------------------------------------------------------------------------------------------------------------------------------------------------------------------------------------------------------------------------------------------------------------------------------------------------------------------------------------------------------------------------------------------------------------------------------------------------------------------------------------------------------------------------------------------------------------------------------------------------------------------------------------------------------------------------------------------------------------------------------------------------------------------------------------------------------------------------------------------------------------------------------------------------------------------------------------------------------------------------------------------------------------------------------------------------------------------------------------------------------------------------------------------------------------------------------------------------------------------------------------------------------------------------------------------------------------------------------------------------------------------------------------------------------------|
| 1612 | 1,2,4,5,11, 3,6,7,8,9,1<br>14,15,16 0,12,13     | 2  | Q4KLZ6,Q6P6Q2                                                                                                                                                                                                                                                                                                                                                                                                                                                                                                                                                                                                                                                                                                                                                                                                                                                                                                                                                                                                                                                                                                                                                                                                                                                                                                                                                                                                                                                                                                                                                                                                                                                                                                                                                                                        |
| 1613 | 1,2,4,5,12, 3,6,7,8,9,1<br>13,14,15 0,11,16     | 2  | P35280,Q6P6R2                                                                                                                                                                                                                                                                                                                                                                                                                                                                                                                                                                                                                                                                                                                                                                                                                                                                                                                                                                                                                                                                                                                                                                                                                                                                                                                                                                                                                                                                                                                                                                                                                                                                                                                                                                                        |
| 1614 | 1,2,4,5,12, 3,6,7,8,9,1<br>13,14,16 0,11,15     | 4  | P35280,Q5RKI1,Q6P6R2,Q6P6S4                                                                                                                                                                                                                                                                                                                                                                                                                                                                                                                                                                                                                                                                                                                                                                                                                                                                                                                                                                                                                                                                                                                                                                                                                                                                                                                                                                                                                                                                                                                                                                                                                                                                                                                                                                          |
| 1615 | 1,2,4,5,12, 3,6,7,8,9,1<br>13,15,16 0,11,14     | 3  | O70417,P35280,Q6P6R2                                                                                                                                                                                                                                                                                                                                                                                                                                                                                                                                                                                                                                                                                                                                                                                                                                                                                                                                                                                                                                                                                                                                                                                                                                                                                                                                                                                                                                                                                                                                                                                                                                                                                                                                                                                 |
| 1616 | 1,2,4,5,12, 3,6,7,8,9,1<br>14,15,16 0,11,13     | 2  | P35280,Q6P6R2                                                                                                                                                                                                                                                                                                                                                                                                                                                                                                                                                                                                                                                                                                                                                                                                                                                                                                                                                                                                                                                                                                                                                                                                                                                                                                                                                                                                                                                                                                                                                                                                                                                                                                                                                                                        |
| 1617 | 1,2,4,5,13, 3,6,7,8,9,1<br>14,15,16 0,11,12     | 2  | P35280,Q6P6R2                                                                                                                                                                                                                                                                                                                                                                                                                                                                                                                                                                                                                                                                                                                                                                                                                                                                                                                                                                                                                                                                                                                                                                                                                                                                                                                                                                                                                                                                                                                                                                                                                                                                                                                                                                                        |
| 1618 | 1,2,4,6,7,8 3,5,11,12,<br>,9,10 13,14,15,1<br>6 | 39 | D4A5U3,iRT -<br>Kit_WR_fusion,O55004,O70594,P02454,P02631,P05371,P06761,P06911,P15399,P17559,P18418,<br>P19223,P19629,P20646,P20762,P23739,P31044,P31430,P36860,P50280,P55091,P70545,P80299<br>,P97580,P98089,Q30KJ2,Q62635,Q63474,Q63598,Q63618,Q6P6R2,Q78P75,Q8CIZ5,Q9JI85,Q9R<br>0T3,Q9WVH8,Q9Z0V6,Q9Z1F2<br>B1H234,D4A5U3,iRT -<br>Kit_WR_fusion,P02631,P02780,P02781,P02782,P04905,P06761,P06911,P07150,P07647,P08723,<br>P09456,P0C0A9,P11598,P12020,P18418,P19223,P19629,P20646,P22273,P22282,P22283,P3143<br>0,P36374,P40241,P46462,P50280,P55091,P60905,P80299,P98089,Q09326,Q4G063,Q4G075,Q5<br>GRG2,Q5M8C6,Q62635,Q63493,Q63617,Q6AYR9,Q6P6R2,Q6P6S4,Q6Q7Y5,Q78P75,Q812E4,Q<br>8CIZ5,Q9JHB9,Q9JI85,Q9QW07,Q9R0T3,Q9Z1F2<br>D4A5U3,iRT -<br>20 Kit_WR_fusion,P02631,P06761,P06911,P12020,P18418,P19629,P31430,P50280,P55091,P80299,<br>P98089,Q5GRG2,Q62635,Q78P75,Q8CIZ5,Q9JI85,Q9R0T3,Q9Z1F2<br>B1H234,D4A5U3,iRT -<br>25 Kit_WR_fusion,O55004,P02631,P06761,P06911,P18418,P19223,P19629,P31430,P36860,P50280,<br>P55091,P80299,P98089,Q30KJ2,Q5GRG2,Q62635,Q66H69,Q78P75,Q8CIZ5,Q9JI85,Q9R0T3,Q9<br>Z1F2<br>B1H234,D3ZHA0,D4A5U3,P02631,P06761,P06911,P18418,P19223,P19629,P20646,P31430,P502<br>25 80,P55091,P80299,P97580,P98089,Q30KJ2,Q5GRG2,Q5QE79,Q62635,Q6TMA8,Q78P75,Q8CIZ5<br>,Q9JI85,Q9Z1F2<br>D4A5U3,iRT -<br>25 Kit_WR_fusion,O55004,P02631,P06761,P06911,P15999,P18418,P19223,P19629,P20646,P50280,<br>P55091,P80299,P98089,Q30KJ2,Q5GRG2,Q62635,Q63474,Q78P75,Q8CIZ5,Q8CJ52,Q9JI85,Q9Z<br>0V6,Q9Z1F2<br>D3ZUC6,D4A5U3,iRT -<br>33 Kit_WR_fusion,O55004,P02631,P02780,P02781,P02782,P06761,P06911,P07151,P07647,P15399,<br>P18418,P19223,P19629,P20646,P20761,P22006,P23593,P50280,P55091,P80299,P97580,P98089<br>,Q30KJ2,Q5GRG2,Q62635,Q6TMA8,Q9JHB9,Q9JI85,Q9R0T3,Q9Z0J6 |
| 1619 | 1,2,4,6,7,8 3,5,10,12,<br>,9,11 13,14,15,1<br>6 | 53 |                                                                                                                                                                                                                                                                                                                                                                                                                                                                                                                                                                                                                                                                                                                                                                                                                                                                                                                                                                                                                                                                                                                                                                                                                                                                                                                                                                                                                                                                                                                                                                                                                                                                                                                                                                                                      |
| 1620 | 1,2,4,6,7,8 3,5,10,11,<br>,9,12 13,14,15,1<br>6 | 20 |                                                                                                                                                                                                                                                                                                                                                                                                                                                                                                                                                                                                                                                                                                                                                                                                                                                                                                                                                                                                                                                                                                                                                                                                                                                                                                                                                                                                                                                                                                                                                                                                                                                                                                                                                                                                      |
| 1621 | 1,2,4,6,7,8 3,5,10,11,<br>,9,13 12,14,15,1<br>6 | 25 |                                                                                                                                                                                                                                                                                                                                                                                                                                                                                                                                                                                                                                                                                                                                                                                                                                                                                                                                                                                                                                                                                                                                                                                                                                                                                                                                                                                                                                                                                                                                                                                                                                                                                                                                                                                                      |
| 1622 | 1,2,4,6,7,8 3,5,10,11,<br>,9,14 12,13,15,1<br>6 | 25 |                                                                                                                                                                                                                                                                                                                                                                                                                                                                                                                                                                                                                                                                                                                                                                                                                                                                                                                                                                                                                                                                                                                                                                                                                                                                                                                                                                                                                                                                                                                                                                                                                                                                                                                                                                                                      |
| 1623 | 1,2,4,6,7,8 3,5,10,11,<br>,9,15 12,13,14,1<br>6 | 25 |                                                                                                                                                                                                                                                                                                                                                                                                                                                                                                                                                                                                                                                                                                                                                                                                                                                                                                                                                                                                                                                                                                                                                                                                                                                                                                                                                                                                                                                                                                                                                                                                                                                                                                                                                                                                      |
| 1624 | 1,2,4,6,7,8 3,5,10,11,<br>,9,16 12,13,14,1<br>5 | 33 |                                                                                                                                                                                                                                                                                                                                                                                                                                                                                                                                                                                                                                                                                                                                                                                                                                                                                                                                                                                                                                                                                                                                                                                                                                                                                                                                                                                                                                                                                                                                                                                                                                                                                                                                                                                                      |

|      |                       |                          |    |                                                                                                                                                                                                                                                                                                                                                                                                                                                                                                                                                                                                             |
|------|-----------------------|--------------------------|----|-------------------------------------------------------------------------------------------------------------------------------------------------------------------------------------------------------------------------------------------------------------------------------------------------------------------------------------------------------------------------------------------------------------------------------------------------------------------------------------------------------------------------------------------------------------------------------------------------------------|
| 1625 | 1,2,4,6,7,8<br>,10,11 | 3,5,9,12,1<br>3,14,15,16 | 57 | B1H234,D4A5U3,O55004,P02631,P02780,P02781,P02782,P04905,P05371,P06761,P06911,P07150,P07647,P08723,P09456,P0C0A9,P11598,P12020,P15399,P18418,P19223,P19629,P20762,P22273,P22282,P22283,P31044,P31430,P35952,P36374,P40241,P46462,P50280,P55091,P80299,P97580,P98089,Q10758,Q30KJ2,Q4G063,Q4G075,Q5GRG2,Q5M8C6,Q62635,Q63493,Q63617,Q66H69,Q68G31,Q6B345,Q78P75,Q8CIZ5,Q99041,Q9JHB9,Q9JI85,Q9QZK8,Q9R0T3,Q9Z1F2                                                                                                                                                                                              |
| 1626 | 1,2,4,6,7,8<br>,10,12 | 3,5,9,11,1<br>3,14,15,16 | 45 | iRT-<br>Kit_WR_fusion,O55004,O88267,P02454,P02631,P05371,P06761,P06911,P12020,P15399,P18418,P19223,P19629,P20762,P30904,P31044,P31430,P36860,P46844,P48508,P50280,P55091,P57113,P80299,P97580,P98089,Q03248,Q30KJ2,Q3ZAV1,Q5GRG2,Q5M7T9,Q5RLM2,Q62635,Q63474,Q63598,Q63618,Q66H69,Q66HG3,Q6Q0N1,Q8CIZ5,Q91ZS3,Q9JI85,Q9R0T3,Q9WTW7,Q9Z1F2                                                                                                                                                                                                                                                                   |
| 1627 | 1,2,4,6,7,8<br>,10,13 | 3,5,9,11,1<br>2,14,15,16 | 50 | D4A5U3,O55004,O70257,O70594,P02454,P02631,P05371,P06761,P06911,P07171,P15399,P18418,P19223,P19468,P19629,P25809,P30904,P31044,P31430,P35952,P36860,P46844,P48508,P50280,P51907,P55091,P57113,P80299,P97580,P98089,Q30KJ2,Q3ZAV1,Q5GRG2,Q5M7T9,Q62635,Q63424,Q63474,Q63598,Q63618,Q66H69,Q66HG3,Q68G31,Q6Q0N1,Q6TMA8,Q78P75,Q8CIZ5,Q9JI85,Q9R0T3,Q9WUW9,Q9Z1F2                                                                                                                                                                                                                                               |
| 1628 | 1,2,4,6,7,8<br>,10,14 | 3,5,9,11,1<br>2,13,15,16 | 39 | D4A5U3,O55004,O70594,P02631,P06761,P06911,P15399,P18418,P19223,P19629,P20762,P31044,P31430,P46844,P48508,P50280,P54921,P55091,P57113,P80299,P97580,P98089,Q30KJ2,Q5GRG2,Q5RLM2,Q62635,Q63474,Q63598,Q63618,Q66H69,Q66HG3,Q68G31,Q6TMA8,Q80WL1,Q8CIZ5,Q923S2,Q9JI85,Q9WUW9,Q9Z1F2                                                                                                                                                                                                                                                                                                                            |
| 1629 | 1,2,4,6,7,8<br>,10,15 | 3,5,9,11,1<br>2,13,14,16 | 68 | O08557,O35763,O55004,O70257,O70377,O70594,O88267,O88339,Q4V882,P02631,P05371,P06761,P06911,P15399,P18418,P18757,P19112,P19223,P19468,P19629,P20646,P20762,P23928,P30904,P31044,P31430,P36860,P38918,P46844,P48508,P50280,P51907,P53790,P54921,P55091,P57113,P80299,P97580,P98089,Q03248,Q05175,Q30KJ2,Q3ZAV1,Q5GRG2,Q5I0E9,Q5M7T9,Q62635,Q63270,Q63424,Q63474,Q63598,Q63618,Q64093,Q66H69,Q6MG61,Q6Q0N1,Q6TMA8,Q80W57,Q8CIZ5,Q8K3P7,Q8R431,Q923S2,Q9JI85,Q9JLJ3,Q9R1T5,Q9WTW7,Q9Z0V6,Q9Z0W7,Q9Z1F2                                                                                                          |
| 1630 | 1,2,4,6,7,8<br>,10,16 | 3,5,9,11,1<br>2,13,14,15 | 84 | D4A5U3,O35763,O55004,O70257,O70377,O70594,O88267,P02454,P02631,P02780,P02781,P02782,P05371,P06761,P06911,P07151,P07647,P11598,P15399,P18418,P18427,P18757,P19112,P19223,P19468,P19629,P20761,P20762,P22283,P23928,P28570,P29975,P31044,P38918,P46844,P48508,P50280,P51907,P53790,P55091,P57113,P80299,P97580,P98089,Q03248,Q05175,Q30KJ2,Q3T1J9,Q3ZAV1,Q5GRG2,Q5I0E9,Q5M7T9,Q5U2Q3,Q62635,Q63270,Q63424,Q63598,Q63618,Q64093,Q64602,Q66H69,Q66HG3,Q68FT5,Q6AY33,Q6AY41,Q6MG61,Q6Q0N1,Q6TMA8,Q71MB6,Q80W57,Q8CIZ5,Q8R431,Q923S2,Q99MA2,Q9JHB9,Q9JI85,Q9JJ40,Q9JLJ3,Q9QYU4,Q9R0T3,Q9R1T5,Q9WTW7,Q9WUW9,Q9Z0W7 |
| 1631 | 1,2,4,6,7,8<br>,11,12 | 3,5,9,10,1<br>3,14,15,16 | 52 | B1H234,iRT-<br>Kit_WR_fusion,O35547,P02631,P02780,P02781,P02782,P04905,P06761,P06911,P07150,P07647,P08723,P09456,P0C0A9,P11598,P11762,P12020,P18418,P19629,P22273,P22282,P22283,P31044,P31430,P36374,P40241,P46462,P50280,P55091,P60905,P80299,P98089,Q00715,Q09326,Q4G063,Q4G075,Q5GRG2,Q5M8C6,Q62635,Q63493,Q63617,Q66H69,Q6AYR9,Q78P75,Q8CIZ5,Q9JHB9,Q9JI85,Q9QW07,Q9QZK8,Q9R0T3,Q9Z1F2                                                                                                                                                                                                                  |

|      |                       |                          |                                                                                                                                                                                                                                                                                                                                                                                                                                                                                                                                                 |
|------|-----------------------|--------------------------|-------------------------------------------------------------------------------------------------------------------------------------------------------------------------------------------------------------------------------------------------------------------------------------------------------------------------------------------------------------------------------------------------------------------------------------------------------------------------------------------------------------------------------------------------|
|      |                       |                          | B1H234,D4A5U3,iRT-<br>Kit_WR_fusion,O35547,O55004,P02631,P02780,P02781,P02782,P04905,P05371,P06761,P06911,<br>P07150,P07647,P08723,P09456,P0C0A9,P11598,P12020,P15399,P18418,P19223,P19629,P2227                                                                                                                                                                                                                                                                                                                                                |
| 1632 | 1,2,4,6,7,8<br>,11,13 | 3,5,9,10,1<br>2,14,15,16 | 62 3,P22282,P22283,P24368,P30120,P31044,P31430,P36374,P40241,P46462,P50280,P55091,P609<br>05,P80299,P98089,Q09326,Q10758,Q30KJ2,Q4G063,Q4G075,Q5GRG2,Q5M8C6,Q62635,Q6290<br>2,Q63493,Q63617,Q66H69,Q68G31,Q6AYR9,Q6TMA8,Q78P75,Q8CIZ5,Q99041,Q9JHB9,Q9JI85<br>,Q9QZK8,Q9R0T3,Q9Z1F2                                                                                                                                                                                                                                                             |
| 1633 | 1,2,4,6,7,8<br>,11,14 | 3,5,9,10,1<br>2,13,15,16 | 54 B1H234,D4A5U3,P02780,P02781,P02782,P04905,P06761,P06911,P07150,P07647,P08723,P0945<br>6,P0C0A9,P11598,P12020,P15399,P18418,P19223,P19629,P22273,P22282,P22283,P31044,P314<br>30,P36374,P40241,P46462,P50280,P55091,P80299,P97580,P98089,Q09326,Q30KJ2,Q4G063,Q4<br>G075,Q5GRG2,Q5M8C6,Q62635,Q63493,Q63617,Q66H69,Q6AYR9,Q6TMA8,Q78P75,Q812E4,<br>Q8CIZ5,Q99041,Q9JHB9,Q9JI85,Q9QW07,Q9QZK8,Q9R0T3,Q9Z1F2                                                                                                                                    |
| 1634 | 1,2,4,6,7,8<br>,11,15 | 3,5,9,10,1<br>2,13,14,16 | 57 B1H234,iRT-<br>Kit_WR_fusion,O55004,P02780,P02781,P02782,P06761,P06911,P07150,P07647,P08723,P09456,<br>P0C0A9,P11598,P12020,P15399,P18418,P19629,P22273,P22282,P22283,P31044,P31430,P3637<br>4,P40241,P46462,P50280,P55091,P80299,P98089,Q09326,Q10758,Q30KJ2,Q4FZU2,Q4G063,Q4<br>G075,Q5GRG2,Q5M8C6,Q62635,Q63493,Q63617,Q66H69,Q6AYR9,Q6IFU8,Q6IMF3,Q6P6Q2,Q<br>6P6S4,Q78P75,Q8CIZ5,Q8CJ52,Q99041,Q9JHB9,Q9JI85,Q9QW07,Q9R0T3,Q9Z0V6,Q9Z1F2                                                                                                |
| 1635 | 1,2,4,6,7,8<br>,11,16 | 3,5,9,10,1<br>2,13,14,15 | 70 B1H234,D4A5U3,iRT-<br>Kit_WR_fusion,O35547,O55004,O88917,P02631,P02761,P02780,P02781,P02782,P04905,P05369<br>,P05371,P06761,P06911,P07150,P07151,P07647,P08010,P08723,P09456,P0C0A9,P11598,P1202<br>0,P15399,P18418,P19223,P19629,P22006,P22273,P22282,P22283,P24368,P30120,P31044,P314<br>30,P36374,P40241,P46462,P50280,P55091,P60905,P80299,P97523,P97580,P98089,Q00715,Q10<br>758,Q30KJ2,Q4G063,Q4G075,Q5GRG2,Q5M8C6,Q62635,Q62902,Q63493,Q63617,Q66H69,Q6<br>AYR9,Q6TMA8,Q78P75,Q812E4,Q99041,Q9JHB9,Q9JI85,Q9QW07,Q9QZK8,Q9R0T3,Q9Z0J6 |
| 1636 | 1,2,4,6,7,8<br>,12,13 | 3,5,9,10,1<br>1,14,15,16 | 30 D4A5U3,iRT-<br>Kit_WR_fusion,O55004,P02631,P02781,P06761,P06911,P12020,P18418,P19223,P19629,P22282,<br>P31044,P31430,P36860,P50280,P55091,P80299,P98089,Q30KJ2,Q5GRG2,Q62635,Q66H69,Q6T<br>MA8,Q78P75,Q8CIZ5,Q9JI85,Q9R0T3,Q9Z1F2,Q9Z2L0                                                                                                                                                                                                                                                                                                     |
| 1637 | 1,2,4,6,7,8<br>,12,14 | 3,5,9,10,1<br>1,13,15,16 | 26 D4A5U3,iRT-<br>Kit_WR_fusion,P02631,P06761,P06911,P11762,P12020,P18418,P19223,P19629,P31044,P31430,<br>P50280,P55091,P80299,P97580,P98089,Q30KJ2,Q5GRG2,Q5RLM2,Q62635,Q66H69,Q6TMA8,Q<br>8CIZ5,Q9JI85,Q9Z1F2                                                                                                                                                                                                                                                                                                                                 |
| 1638 | 1,2,4,6,7,8<br>,12,15 | 3,5,9,10,1<br>1,13,14,16 | 26 iRT-<br>Kit_WR_fusion,O55004,P02631,P06761,P06911,P11762,P12020,P18418,P19629,P19814,P31044,<br>P31430,P50280,P55091,P80299,P98089,Q30KJ2,Q5GRG2,Q62635,Q63598,Q66H69,Q6TMA8,Q<br>8CIZ5,Q9JI85,Q9Z0V6,Q9Z1F2                                                                                                                                                                                                                                                                                                                                 |

|      |                       |                                                                                                                                                                                                                                                                                                                                                                                 |
|------|-----------------------|---------------------------------------------------------------------------------------------------------------------------------------------------------------------------------------------------------------------------------------------------------------------------------------------------------------------------------------------------------------------------------|
|      |                       | D4A5U3,iRT-                                                                                                                                                                                                                                                                                                                                                                     |
| 1639 | 1,2,4,6,7,8<br>,12,16 | 3,5,9,10,1<br>1,13,14,15                                                                                                                                                                                                                                                                                                                                                        |
| 1640 | 1,2,4,6,7,8<br>,13,14 | 3,5,9,10,1<br>1,12,15,16                                                                                                                                                                                                                                                                                                                                                        |
| 1641 | 1,2,4,6,7,8<br>,13,15 | 3,5,9,10,1<br>1,12,14,16                                                                                                                                                                                                                                                                                                                                                        |
| 1642 | 1,2,4,6,7,8<br>,13,16 | 3,5,9,10,1<br>1,12,14,15                                                                                                                                                                                                                                                                                                                                                        |
| 1643 | 1,2,4,6,7,8<br>,14,15 | 3,5,9,10,1<br>1,12,13,16                                                                                                                                                                                                                                                                                                                                                        |
| 1644 | 1,2,4,6,7,8<br>,14,16 | 3,5,9,10,1<br>1,12,13,15                                                                                                                                                                                                                                                                                                                                                        |
| 1645 | 1,2,4,6,7,8<br>,15,16 | 3,5,9,10,1<br>1,12,13,14                                                                                                                                                                                                                                                                                                                                                        |
| 1646 | 1,2,4,6,7,9<br>,10,11 | 3,5,8,12,1<br>3,14,15,16                                                                                                                                                                                                                                                                                                                                                        |
| 1647 | 1,2,4,6,7,9<br>,10,12 | 3,5,8,11,1<br>3,14,15,16                                                                                                                                                                                                                                                                                                                                                        |
| 1648 | 1,2,4,6,7,9<br>,10,13 | 3,5,8,11,1<br>2,14,15,16                                                                                                                                                                                                                                                                                                                                                        |
| 1649 | 1,2,4,6,7,9<br>,10,14 | 3,5,8,11,1<br>2,13,15,16                                                                                                                                                                                                                                                                                                                                                        |
| 1650 | 1,2,4,6,7,9<br>,10,15 | 3,5,8,11,1<br>2,13,14,16                                                                                                                                                                                                                                                                                                                                                        |
| 1651 | 1,2,4,6,7,9<br>,10,16 | 3,5,8,11,1<br>2,13,14,15                                                                                                                                                                                                                                                                                                                                                        |
| 37   |                       | P12020,P15399,P18418,P19223,P19629,P22282,P22283,P31430,P46844,P50280,P55091,P80299,P97580,P98089,Q30KJ2,Q5GRG2,Q5M8C6,Q62635,Q63598,Q66H69,Q6TMA8,Q8CIZ5,Q9JHB9,Q9JI85,Q9R0T3                                                                                                                                                                                                  |
| 33   |                       | B0BNN3,B1H234,D3ZHA0,D4A5U3,O55004,P02631,P06761,P06911,P12020,P18418,P19223,P19629,P25809,P31044,P31430,P50280,P55091,P80299,P97580,P98089,Q30KJ2,Q4G075,Q5GRG2,Q62635,Q66H69,Q68G31,Q6TMA8,Q78P75,Q8CIZ5,Q9JI85,Q9WUW8,Q9Z1F2,Q9Z2L0                                                                                                                                          |
| 31   |                       | B1H234,D4A5U3,O55004,P02631,P04916,P06761,P06911,P15399,P18418,P19223,P19629,P31044,P36860,P50280,P55091,P80299,P97580,P98089,Q30KJ2,Q5GRG2,Q62635,Q63598,Q63618,Q66H69,Q68G31,Q6Q0N1,Q6TMA8,Q78P75,Q8CIZ5,Q9JI85,Q9Z1F2                                                                                                                                                        |
| 48   |                       | B0BNN3,B1H234,D4A5U3,O35956,O55004,O70257,P02631,P02761,P02780,P02781,P02782,P05371,P06761,P06911,P07151,P07647,P11598,P15399,P18418,P19223,P19468,P19629,P20761,P22282,P22283,P30120,P46844,P50280,P55091,P80299,P97580,P98089,Q30KJ2,Q3ZAV1,Q5GRG2,Q5M7T9,Q5M8C6,Q62635,Q63598,Q63618,Q66H69,Q6Q0N1,Q6TMA8,Q8CIZ5,Q9JHB9,Q9JI85,Q9R0T3,Q9Z0J6                                 |
| 24   |                       | O55004,P06761,P06911,P15399,P15999,P18418,P19223,P19629,P20762,P31044,P50280,P54921,P55091,P80299,P97580,P98089,Q30KJ2,Q5GRG2,Q62635,Q63474,Q6TMA8,Q8CIZ5,Q9JI85,Q9Z1F2                                                                                                                                                                                                         |
| 37   |                       | B1H234,D3ZHA0,D4A5U3,O55004,P02631,P02761,P02780,P02781,P02782,P06761,P06911,P07151,P07647,P11598,P12020,P15399,P18418,P19223,P19629,P20761,P20762,P46844,P50280,P55091,P57113,P80299,P97580,P98089,Q30KJ2,Q4G075,Q5GRG2,Q62635,Q6TMA8,Q8CIZ5,Q9JHB9,Q9JI85,Q9WUW8                                                                                                              |
| 51   |                       | B2RYW9,iRT-Kit_WR_fusion,O55004,O70594,P02631,P02761,P02780,P02781,P02782,P06761,P06911,P07151,P07647,P15399,P15999,P17988,P18418,P19112,P19223,P19468,P19629,P20646,P20761,P20762,P46844,P48508,P50280,P53790,P55091,P57113,P80299,P97580,P98089,Q03248,Q30KJ2,Q3ZAV1,Q5GRG2,Q5M7T9,Q5U2Q3,Q62635,Q63270,Q63598,Q6Q0N1,Q6TMA8,Q8CJ52,Q9JHB9,Q9JI85,Q9R1T5,Q9WTW7,Q9Z0V6,Q9Z0W7 |
| 6    |                       | B1H234,P11598,P55091,P80299,Q63617,Q9R168                                                                                                                                                                                                                                                                                                                                       |
| 5    |                       | P36860,P55091,P80299,Q80WL1,Q9Z1F2                                                                                                                                                                                                                                                                                                                                              |
| 6    |                       | P36860,P55091,P80299,Q9R168,Q9WVH8,Q9Z1F2                                                                                                                                                                                                                                                                                                                                       |
| 6    |                       | P00762,P80299,Q80WL1,Q9R168,Q9WVH8,Q9Z1F2                                                                                                                                                                                                                                                                                                                                       |
| 7    |                       | P00762,P36860,P80299,Q63474,Q811M5,Q9WVH8,Q9Z1F2                                                                                                                                                                                                                                                                                                                                |
| 6    |                       | D3ZUC6,P07647,P22006,P80299,Q9R168,Q9WVH8                                                                                                                                                                                                                                                                                                                                       |



|      |                        |                          |    |                                                                                                                                                    |
|------|------------------------|--------------------------|----|----------------------------------------------------------------------------------------------------------------------------------------------------|
| 1652 | 1,2,4,6,7,9<br>,11,12  | 3,5,8,10,1<br>3,14,15,16 | 7  | B1H234,O35077,P11598,P22283,P80299,Q5GRG2,Q63617                                                                                                   |
| 1653 | 1,2,4,6,7,9<br>,11,13  | 3,5,8,10,1<br>2,14,15,16 | 10 | B1H234,P11598,P22283,P55091,P80299,Q5GRG2,Q63617,Q9EQS0,Q9JH85,Q9R168                                                                              |
| 1654 | 1,2,4,6,7,9<br>,11,14  | 3,5,8,10,1<br>2,13,15,16 | 7  | B1H234,P0DMW0;P0DMW1,P11598,P80299,Q5GRG2,Q63617,Q9R168                                                                                            |
| 1655 | 1,2,4,6,7,9<br>,11,15  | 3,5,8,10,1<br>2,13,14,16 | 5  | B1H234,P11598,P80299,Q63617,Q8CJ52                                                                                                                 |
| 1656 | 1,2,4,6,7,9<br>,11,16  | 3,5,8,10,1<br>2,13,14,15 | 21 | B1H234,D3ZUC6,P02780,P02781,P02782,P07647,P08723,P09456,P0C0A9,P11598,P22006,P22283,P80299,P81556,Q5GRG2,Q63617,Q812E4,Q9EQS0,Q9JHB9,Q9R168,Q9Z0J6 |
| 1657 | 1,2,4,6,7,9<br>,12,13  | 3,5,8,10,1<br>1,14,15,16 | 1  | P80299                                                                                                                                             |
| 1658 | 1,2,4,6,7,9<br>,12,14  | 3,5,8,10,1<br>1,13,15,16 | 2  | P80299,Q80WL1                                                                                                                                      |
| 1659 | 1,2,4,6,7,9<br>,12,15  | 3,5,8,10,1<br>1,13,14,16 | 1  | P80299                                                                                                                                             |
| 1660 | 1,2,4,6,7,9<br>,12,16  | 3,5,8,10,1<br>1,13,14,15 | 4  | D3ZUC6,P07647,P22006,P80299                                                                                                                        |
| 1661 | 1,2,4,6,7,9<br>,13,14  | 3,5,8,10,1<br>1,12,15,16 | 4  | B1H234,P01835,P80299,Q9R168                                                                                                                        |
| 1662 | 1,2,4,6,7,9<br>,13,15  | 3,5,8,10,1<br>1,12,14,16 | 4  | B1H234,P01835,P36860,P80299                                                                                                                        |
| 1663 | 1,2,4,6,7,9<br>,13,16  | 3,5,8,10,1<br>1,12,14,15 | 8  | B1H234,D3ZUC6,P07647,P22006,P80299,Q9EQS0,Q9R168,Q9Z0J6                                                                                            |
| 1664 | 1,2,4,6,7,9<br>,14,15  | 3,5,8,10,1<br>1,12,13,16 | 1  | P80299                                                                                                                                             |
| 1665 | 1,2,4,6,7,9<br>,14,16  | 3,5,8,10,1<br>1,12,13,15 | 6  | B1H234,P07647,P22006,P80299,Q80WL1,Q9R168                                                                                                          |
| 1666 | 1,2,4,6,7,9<br>,15,16  | 3,5,8,10,1<br>1,12,13,14 | 4  | D3ZUC6,P22006,P80299,Q9R168                                                                                                                        |
| 1667 | 1,2,4,6,7,1<br>0,11,12 | 3,5,8,9,13,<br>14,15,16  | 6  | P11598,P22283,P31430,P55091,P80299,Q5GRG2                                                                                                          |
| 1668 | 1,2,4,6,7,1<br>0,11,13 | 3,5,8,9,12,<br>14,15,16  | 10 | B1H234,P11598,P22283,P36860,P55091,P80299,Q63617,Q68G31,Q9JH85,Q9Z1F2                                                                              |
| 1669 | 1,2,4,6,7,1<br>0,11,14 | 3,5,8,9,12,<br>13,15,16  | 7  | B1H234,P11598,P55091,P80299,Q5GRG2,Q80WL1,Q9Z1F2                                                                                                   |
| 1670 | 1,2,4,6,7,1<br>0,11,15 | 3,5,8,9,12,<br>13,14,16  | 8  | B1H234,P08721,P11598,P17988,P19629,P80299,Q8CJ52,Q9Z1F2                                                                                            |
| 1671 | 1,2,4,6,7,1<br>0,11,16 | 3,5,8,9,12,<br>13,14,15  | 15 | B1H234,P02780,P02781,P02782,P07647,P08723,P0C0A9,P11598,P17988,P22283,P80299,Q5GRG2,Q5M872,Q63617,Q9JHB9                                           |

|      |                        |                         |    |                                                                                                                                                                                       |
|------|------------------------|-------------------------|----|---------------------------------------------------------------------------------------------------------------------------------------------------------------------------------------|
| 1672 | 1,2,4,6,7,1<br>0,12,13 | 3,5,8,9,11,<br>14,15,16 | 7  | O88797,P01835,P02631,P36860,P80299,Q66HG3,Q9Z1F2                                                                                                                                      |
| 1673 | 1,2,4,6,7,1<br>0,12,14 | 3,5,8,9,11,<br>13,15,16 | 4  | P80299,Q5RLM2,Q80WL1,Q9Z1F2                                                                                                                                                           |
| 1674 | 1,2,4,6,7,1<br>0,12,15 | 3,5,8,9,11,<br>13,14,16 | 6  | P10758,P19629,P36860,P80299,Q63598,Q9Z1F2                                                                                                                                             |
| 1675 | 1,2,4,6,7,1<br>0,12,16 | 3,5,8,9,11,<br>13,14,15 | 7  | P07647,P10758,P18297,P57113,P80299,Q03248,Q63598                                                                                                                                      |
| 1676 | 1,2,4,6,7,1<br>0,13,14 | 3,5,8,9,11,<br>12,15,16 | 6  | B1H234,O88797,P01835,P80299,Q80WL1,Q9Z1F2                                                                                                                                             |
| 1677 | 1,2,4,6,7,1<br>0,13,15 | 3,5,8,9,11,<br>12,14,16 | 11 | O88797,P01835,P19468,P36860,P51907,P80299,Q63474,Q63598,Q63618,Q923M1,Q9Z1F2                                                                                                          |
| 1678 | 1,2,4,6,7,1<br>0,13,16 | 3,5,8,9,11,<br>12,14,15 | 17 | B1H234,O55004,P01835,P02761,P07647,P09527,P18297,P19468,P28570,P36376,P46844,P51907,P57113,P80299,Q63424,Q63598,Q63618                                                                |
| 1679 | 1,2,4,6,7,1<br>0,14,15 | 3,5,8,9,11,<br>12,13,16 | 8  | O88797,P09527,P54921,P80299,Q63474,Q80WL1,Q9QYP1,Q9Z1F2                                                                                                                               |
| 1680 | 1,2,4,6,7,1<br>0,14,16 | 3,5,8,9,11,<br>12,13,15 | 9  | P02761,P07647,P09527,P18297,P57113,P80299,Q71MB6,Q80WL1,Q9QYP1                                                                                                                        |
| 1681 | 1,2,4,6,7,1<br>0,15,16 | 3,5,8,9,11,<br>12,13,14 | 25 | P09527,P10758,P17988,P18297,P19468,P19629,P46844,P48508,P51907,P53790,P57113,P80299,Q03248,Q5I0E9,Q5M7T9,Q63270,Q63424,Q63598,Q63618,Q6Q0N1,Q71MB6,Q923M1,Q9QYP1,Q9R1T5,Q9WTW7        |
| 1682 | 1,2,4,6,7,1<br>1,12,13 | 3,5,8,9,10,<br>14,15,16 | 10 | B1H234,P05369,P07647,P11598,P22283,P36374,P80299,Q5GRG2,Q63617,Q9JI85                                                                                                                 |
| 1683 | 1,2,4,6,7,1<br>1,12,14 | 3,5,8,9,10,<br>13,15,16 | 6  | B1H234,P11598,P22283,P80299,Q5GRG2,Q80WL1                                                                                                                                             |
| 1684 | 1,2,4,6,7,1<br>1,12,15 | 3,5,8,9,10,<br>13,14,16 | 7  | B1H234,P11598,P22283,P36374,P80299,Q5GRG2,Q8CJ52                                                                                                                                      |
| 1685 | 1,2,4,6,7,1<br>1,12,16 | 3,5,8,9,10,<br>13,14,15 | 19 | B1H234,O35547,P02780,P02781,P02782,P05369,P07647,P08723,P0C0A9,P11598,P22283,P36374,P80299,Q00715,Q5GRG2,Q5M872,Q63617,Q9JHB9,Q9JI85                                                  |
| 1686 | 1,2,4,6,7,1<br>1,13,14 | 3,5,8,9,10,<br>12,15,16 | 10 | B1H234,P01835,P07647,P11598,P22283,P80299,Q5GRG2,Q63617,Q99041,Q9JI85                                                                                                                 |
| 1687 | 1,2,4,6,7,1<br>1,13,15 | 3,5,8,9,10,<br>12,14,16 | 9  | B1H234,P01835,P11598,P22283,P80299,Q5GRG2,Q63617,Q8CJ52,Q9JI85                                                                                                                        |
| 1688 | 1,2,4,6,7,1<br>1,13,16 | 3,5,8,9,10,<br>12,14,15 | 26 | B1H234,O35547,P00714,P02761,P02780,P02781,P02782,P05369,P07647,P08723,P09456,P0C0A9,P11598,P22283,P24368,P36374,P80299,Q5GRG2,Q5M872,Q63617,Q99041,Q9EQS0,Q9JHB9,Q9JI85,Q9R168,Q9Z0J6 |
| 1689 | 1,2,4,6,7,1<br>1,14,15 | 3,5,8,9,10,<br>12,13,16 | 5  | B1H234,P11598,P80299,Q5GRG2,Q8CJ52                                                                                                                                                    |
| 1690 | 1,2,4,6,7,1<br>1,14,16 | 3,5,8,9,10,<br>12,13,15 | 21 | B1H234,O35547,P02761,P02780,P02781,P02782,P07647,P08723,P09456,P0C0A9,P11598,P22006,P22283,P80299,Q4KLZ6,Q5GRG2,Q5M872,Q63617,Q99041,Q9JHB9,Q9R168                                    |

|      |                        |                          |    |                                                                                                                     |
|------|------------------------|--------------------------|----|---------------------------------------------------------------------------------------------------------------------|
| 1691 | 1,2,4,6,7,1<br>1,15,16 | 3,5,8,9,10,<br>12,13,14  | 16 | B1H234,P02780,P02781,P02782,P07647,P08723,P0C0A9,P11598,P17988,P22283,P36374,P8029<br>9,Q5GRG2,Q63617,Q8CJ52,Q9JHB9 |
| 1692 | 1,2,4,6,7,1<br>2,13,14 | 3,5,8,9,10,<br>11,15,16  | 3  | O88797,P01835,P80299                                                                                                |
| 1693 | 1,2,4,6,7,1<br>2,13,15 | 3,5,8,9,10,<br>11,14,16  | 4  | O88797,P01835,P36860,P80299                                                                                         |
| 1694 | 1,2,4,6,7,1<br>2,13,16 | 3,5,8,9,10,<br>11,14,15  | 3  | P01835,P07647,P80299                                                                                                |
| 1695 | 1,2,4,6,7,1<br>2,14,15 | 3,5,8,9,10,<br>11,13,16  | 2  | P80299,Q80WL1                                                                                                       |
| 1696 | 1,2,4,6,7,1<br>2,14,16 | 3,5,8,9,10,<br>11,13,15  | 3  | P07647,P80299,Q80WL1                                                                                                |
| 1697 | 1,2,4,6,7,1<br>2,15,16 | 3,5,8,9,10,<br>11,13,14  | 5  | P07647,P10758,P17988,P19629,P80299                                                                                  |
| 1698 | 1,2,4,6,7,1<br>3,14,15 | 3,5,8,9,10,<br>11,12,16  | 4  | B1H234,O88797,P01835,P80299                                                                                         |
| 1699 | 1,2,4,6,7,1<br>3,14,16 | 3,5,8,9,10,<br>11,12,15  | 8  | B0BNN3,B1H234,P01835,P02761,P07647,P36376,P80299,Q9EQS0                                                             |
| 1700 | 1,2,4,6,7,1<br>3,15,16 | 3,5,8,9,10,<br>11,12,14  | 7  | B1H234,P01835,P02761,P07647,P10719,P80299,Q9EQS0                                                                    |
| 1701 | 1,2,4,6,7,1<br>4,15,16 | 3,5,8,9,10,<br>11,12,13  | 7  | B1H234,P01835,P02761,P07647,P17988,P80299,Q9QYP1                                                                    |
| 1702 | 1,2,4,6,8,9<br>,10,11  | 3,5,7,12,1<br>3,14,15,16 | 13 | P02454,P15399,P18418,P31430,P50280,P55091,P97580,Q30KJ2,Q5GRG2,Q68G31,Q6AY61,Q6P<br>6S4,Q9JI85                      |
| 1703 | 1,2,4,6,8,9<br>,10,12  | 3,5,7,11,1<br>3,14,15,16 | 7  | P02454,P02631,P15399,P17559,P18418,P55091,Q30KJ2                                                                    |
| 1704 | 1,2,4,6,8,9<br>,10,13  | 3,5,7,11,1<br>2,14,15,16 | 11 | O55004,P02454,P02631,P15399,P17559,P18418,P55091,P97580,Q30KJ2,Q68G31,Q9Z1F2                                        |
| 1705 | 1,2,4,6,8,9<br>,10,14  | 3,5,7,11,1<br>2,13,15,16 | 9  | P15399,P17559,P18418,P47967,P97580,P97840,Q30KJ2,Q68G31,Q9Z1F2                                                      |
| 1706 | 1,2,4,6,8,9<br>,10,15  | 3,5,7,11,1<br>2,13,14,16 | 10 | P02454,P15399,P18418,P19629,P97580,Q30KJ2,Q63474,Q68G31,Q811M5,Q9Z1F2                                               |
| 1707 | 1,2,4,6,8,9<br>,10,16  | 3,5,7,11,1<br>2,13,14,15 | 12 | D3ZUC6,O55004,P02454,P02631,P07151,P15399,P18418,P19629,P22006,P70545,P97580,Q30KJ<br>2                             |
| 1708 | 1,2,4,6,8,9<br>,11,12  | 3,5,7,10,1<br>3,14,15,16 | 12 | O35077,P06911,P12020,P31430,P50280,P60905,P61206,P84079,Q5GRG2,Q5RKI1,Q6P6S4,Q6Q<br>7Y5,Q9JI85                      |
| 1709 | 1,2,4,6,8,9<br>,11,13  | 3,5,7,10,1<br>2,14,15,16 | 13 | P06911,P31430,P50280,P55091,P60905,Q09326,Q5GRG2,Q5RKI1,Q68G31,Q6AY61,Q6AYR9,Q6<br>P6S4,Q9JI85                      |
| 1710 | 1,2,4,6,8,9<br>,11,14  | 3,5,7,10,1<br>2,13,15,16 | 12 | P06911,P12020,P31430,P50280,P97580,Q5GRG2,Q5RKI1,Q62635,Q6AY61,Q6P6S4,Q812E4,Q9J<br>I85                             |

|      |                        |                          |    |                                                                                                                                                                                                            |
|------|------------------------|--------------------------|----|------------------------------------------------------------------------------------------------------------------------------------------------------------------------------------------------------------|
| 1711 | 1,2,4,6,8,9<br>,11,15  | 3,5,7,10,1<br>2,13,14,16 | 8  | P15399,P50280,Q10758,Q5GRG2,Q6IFU8,Q6P6S4,Q8CJ52,Q9JI85                                                                                                                                                    |
| 1712 | 1,2,4,6,8,9<br>,11,16  | 3,5,7,10,1<br>2,13,14,15 | 29 | D3ZUC6,O35547,P02780,P02781,P02782,P04905,P06911,P07647,P08723,P09456,P0C0A9,P15399,P18418,P22006,P30120,P36374,P46462,P50280,P60905,Q10758,Q30KJ2,Q5GRG2,Q5RKI1,Q6AY61,Q6P6S4,Q812E4,Q9JHB9,Q9JI85,Q9QW07 |
| 1713 | 1,2,4,6,8,9<br>,12,13  | 3,5,7,10,1<br>1,14,15,16 | 2  | Q5RKI1,Q9JI85                                                                                                                                                                                              |
| 1714 | 1,2,4,6,8,9<br>,12,14  | 3,5,7,10,1<br>1,13,15,16 | 3  | Q5GRG2,Q5RKI1,Q62635                                                                                                                                                                                       |
| 1715 | 1,2,4,6,8,9<br>,12,15  | 3,5,7,10,1<br>1,13,14,16 | 0  |                                                                                                                                                                                                            |
| 1716 | 1,2,4,6,8,9<br>,12,16  | 3,5,7,10,1<br>1,13,14,15 | 4  | D3ZUC6,P22006,Q30KJ2,Q5RKI1                                                                                                                                                                                |
| 1717 | 1,2,4,6,8,9<br>,13,14  | 3,5,7,10,1<br>1,12,15,16 | 5  | P97580,Q30KJ2,Q5RKI1,Q62635,Q68G31                                                                                                                                                                         |
| 1718 | 1,2,4,6,8,9<br>,13,15  | 3,5,7,10,1<br>1,12,14,16 | 2  | Q30KJ2,Q68G31                                                                                                                                                                                              |
| 1719 | 1,2,4,6,8,9<br>,13,16  | 3,5,7,10,1<br>1,12,14,15 | 9  | D3ZUC6,P15399,P18418,P22006,P23593,P97580,Q30KJ2,Q5RKI1,Q9JI85                                                                                                                                             |
| 1720 | 1,2,4,6,8,9<br>,14,15  | 3,5,7,10,1<br>1,12,13,16 | 5  | P23593,P47967,P97580,P97840,Q30KJ2                                                                                                                                                                         |
| 1721 | 1,2,4,6,8,9<br>,14,16  | 3,5,7,10,1<br>1,12,13,15 | 8  | P15399,P22006,P23593,P47967,P97580,P97840,Q30KJ2,Q5RKI1                                                                                                                                                    |
| 1722 | 1,2,4,6,8,9<br>,15,16  | 3,5,7,10,1<br>1,12,13,14 | 9  | D3ZUC6,P15399,P19629,P22006,P23593,P47967,P50280,P97580,Q30KJ2                                                                                                                                             |
| 1723 | 1,2,4,6,8,1<br>0,11,12 | 3,5,7,9,13,<br>14,15,16  | 13 | P02631,P06911,P12020,P15399,P18418,P31430,P50280,P55091,P97580,Q30KJ2,Q5GRG2,Q68G31,Q9JI85                                                                                                                 |
| 1724 | 1,2,4,6,8,1<br>0,11,13 | 3,5,7,9,12,<br>14,15,16  | 13 | O55004,P02631,P15399,P18418,P31430,P50280,P55091,P97580,Q10758,Q30KJ2,Q5GRG2,Q68G31,Q9JI85                                                                                                                 |
| 1725 | 1,2,4,6,8,1<br>0,11,14 | 3,5,7,9,12,<br>13,15,16  | 14 | P06911,P12020,P15399,P18418,P31430,P50280,P55091,P97580,Q10758,Q30KJ2,Q5GRG2,Q62635,Q68G31,Q9JI85                                                                                                          |
| 1726 | 1,2,4,6,8,1<br>0,11,15 | 3,5,7,9,12,<br>13,14,16  | 13 | P15399,P18418,P19629,P31430,P50280,P97580,Q10758,Q30KJ2,Q5GRG2,Q63474,Q68G31,Q6IFU8,Q9JI85                                                                                                                 |
| 1727 | 1,2,4,6,8,1<br>0,11,16 | 3,5,7,9,12,<br>13,14,15  | 26 | O55004,P02780,P02781,P02782,P04905,P07151,P07647,P08723,P09456,P0C0A9,P12020,P15399,P18418,P19629,P30120,P36374,P46462,P50280,P97580,Q10758,Q30KJ2,Q5GRG2,Q68G31,Q6AY61,Q9JHB9,Q9JI85                      |
| 1728 | 1,2,4,6,8,1<br>0,12,13 | 3,5,7,9,11,<br>14,15,16  | 8  | O55004,P02631,P15399,P97580,Q30KJ2,Q66H69,Q68G31,Q9JI85                                                                                                                                                    |
| 1729 | 1,2,4,6,8,1<br>0,12,14 | 3,5,7,9,11,<br>13,15,16  | 7  | P02631,P15399,P54921,P97580,Q30KJ2,Q68G31,Q9Z1F2                                                                                                                                                           |

|      |                        |                         |    |                                                                                                                                                                                                                                        |
|------|------------------------|-------------------------|----|----------------------------------------------------------------------------------------------------------------------------------------------------------------------------------------------------------------------------------------|
| 1730 | 1,2,4,6,8,1<br>0,12,15 | 3,5,7,9,11,<br>13,14,16 | 11 | O55004,P02631,P15399,P19629,P54921,P97580,Q30KJ2,Q498D9,Q63474,Q63598,Q9Z1F2                                                                                                                                                           |
| 1731 | 1,2,4,6,8,1<br>0,12,16 | 3,5,7,9,11,<br>13,14,15 | 12 | O55004,O88267,P02631,P07151,P0DMW0,P0DMW1,P15399,P18418,P19629,P97580,Q30KJ2,Q63598,Q9JI85                                                                                                                                             |
| 1732 | 1,2,4,6,8,1<br>0,13,14 | 3,5,7,9,11,<br>12,15,16 | 8  | O55004,P02631,P15399,P97580,Q30KJ2,Q68G31,Q9JI85,Q9Z1F2                                                                                                                                                                                |
| 1733 | 1,2,4,6,8,1<br>0,13,15 | 3,5,7,9,11,<br>12,14,16 | 14 | O55004,P02631,P15399,P19629,P36860,P51907,P97580,Q30KJ2,Q498D9,Q63474,Q63598,Q63618,Q68G31,Q9Z1F2                                                                                                                                      |
| 1734 | 1,2,4,6,8,1<br>0,13,16 | 3,5,7,9,11,<br>12,14,15 | 12 | O55004,O70257,P02631,P07151,P15399,P18418,P46844,P97580,Q30KJ2,Q63618,Q68G31,Q9JI85                                                                                                                                                    |
| 1735 | 1,2,4,6,8,1<br>0,14,15 | 3,5,7,9,11,<br>12,13,16 | 10 | O55004,P15399,P19629,P20762,P54921,P97580,Q30KJ2,Q63474,Q68G31,Q9Z1F2                                                                                                                                                                  |
| 1736 | 1,2,4,6,8,1<br>0,14,16 | 3,5,7,9,11,<br>12,13,15 | 9  | O55004,P07151,P15399,P18418,P20762,P54921,P97580,Q30KJ2,Q68G31                                                                                                                                                                         |
| 1737 | 1,2,4,6,8,1<br>0,15,16 | 3,5,7,9,11,<br>12,13,14 | 20 | O55004,P07151,P15399,P18418,P19468,P19629,P20762,P50280,P51907,P53790,P54921,P97580,Q03248,Q30KJ2,Q63598,Q63618,Q68G31,Q6Q0N1,Q9R1T5,Q9WTW7                                                                                            |
| 1738 | 1,2,4,6,8,1<br>1,12,13 | 3,5,7,9,10,<br>14,15,16 | 16 | O35547,O54861,P06911,P12020,P31430,P36374,P40241,P46462,P50280,P60905,Q09326,Q5GRG2,Q5RKI1,Q66H69,Q68G31,Q9JI85                                                                                                                        |
| 1739 | 1,2,4,6,8,1<br>1,12,14 | 3,5,7,9,10,<br>13,15,16 | 10 | P06911,P12020,P31430,P36374,P50280,P97580,Q5GRG2,Q5RKI1,Q62635,Q9JI85                                                                                                                                                                  |
| 1740 | 1,2,4,6,8,1<br>1,12,15 | 3,5,7,9,10,<br>13,14,16 | 12 | P06911,P12020,P15399,P19629,P31430,P36374,P50280,Q10758,Q5GRG2,Q6IFU8,Q9JI85,Q9QW07                                                                                                                                                    |
| 1741 | 1,2,4,6,8,1<br>1,12,16 | 3,5,7,9,10,<br>13,14,15 | 30 | O35547,P02780,P02781,P02782,P04905,P06911,P07647,P08723,P09456,P0C0A9,P12020,P15399,P22282,P22283,P30120,P31430,P36374,P40241,P46462,P50280,P60905,Q00715,Q10758,Q30KJ2,Q5GRG2,Q5M8C6,Q5RKI1,Q9JHB9,Q9JI85,Q9QW07                      |
| 1742 | 1,2,4,6,8,1<br>1,13,14 | 3,5,7,9,10,<br>12,15,16 | 18 | O54728,O54861,P06911,P12020,P15399,P31430,P46462,P50280,P97580,Q09326,Q10758,Q30KJ2,Q5GRG2,Q5RKI1,Q62635,Q68G31,Q9JI85,Q9QWN8                                                                                                          |
| 1743 | 1,2,4,6,8,1<br>1,13,15 | 3,5,7,9,10,<br>12,14,16 | 10 | O54861,P15399,P50280,Q09326,Q10758,Q30KJ2,Q5GRG2,Q68G31,Q6IFU8,Q9JI85                                                                                                                                                                  |
| 1744 | 1,2,4,6,8,1<br>1,13,16 | 3,5,7,9,10,<br>12,14,15 | 33 | O35547,O54861,P02780,P02781,P02782,P04905,P05369,P06911,P07647,P08723,P09456,P0C0A9,P12020,P15399,P18418,P22282,P22283,P24368,P30120,P36374,P40241,P46462,P50280,P60905,P97580,Q10758,Q30KJ2,Q5GRG2,Q5RKI1,Q68G31,Q6AY61,Q9JHB9,Q9JI85 |
| 1745 | 1,2,4,6,8,1<br>1,14,15 | 3,5,7,9,10,<br>12,13,16 | 14 | O54861,P06911,P12020,P15399,P50280,P97580,Q10758,Q30KJ2,Q5GRG2,Q62635,Q68G31,Q6IFU8,Q8CJ52,Q9JI85                                                                                                                                      |
| 1746 | 1,2,4,6,8,1<br>1,14,16 | 3,5,7,9,10,<br>12,13,15 | 30 | O35547,O54728,O54861,P02780,P02781,P02782,P04905,P06911,P07647,P08723,P09456,P0C0A9,P12020,P15399,P30120,P36374,P46462,P50280,P60905,P97580,Q10758,Q30KJ2,Q4KLZ6,Q5GRG2,Q5RKI1,Q62635,Q6AY61,Q812E4,Q9JHB9,Q9JI85                      |
| 1747 | 1,2,4,6,8,1<br>1,15,16 | 3,5,7,9,10,<br>12,13,14 | 26 | O35547,O54861,P02780,P02781,P02782,P07647,P08723,P09456,P0C0A9,P12020,P15399,P19629,P30120,P36374,P46462,P50280,P60905,P97580,Q10758,Q30KJ2,Q5GRG2,Q6IFU8,Q8CJ52,Q9JHB9,Q9JI85,Q9QW07                                                  |

|      |                        |                         |    |                                                                       |
|------|------------------------|-------------------------|----|-----------------------------------------------------------------------|
| 1748 | 1,2,4,6,8,1<br>2,13,14 | 3,5,7,9,10,<br>11,15,16 | 8  | P06911,P97580,Q30KJ2,Q5GRG2,Q5RKI1,Q62635,Q68G31,Q9JI85               |
| 1749 | 1,2,4,6,8,1<br>2,13,15 | 3,5,7,9,10,<br>11,14,16 | 3  | Q30KJ2,Q68G31,Q9JI85                                                  |
| 1750 | 1,2,4,6,8,1<br>2,13,16 | 3,5,7,9,10,<br>11,14,15 | 7  | P02631,P07647,P15399,P97580,Q30KJ2,Q5RKI1,Q9JI85                      |
| 1751 | 1,2,4,6,8,1<br>2,14,15 | 3,5,7,9,10,<br>11,13,16 | 5  | P54921,P97580,Q30KJ2,Q5GRG2,Q62635                                    |
| 1752 | 1,2,4,6,8,1<br>2,14,16 | 3,5,7,9,10,<br>11,13,15 | 8  | P06911,P12020,P15399,P97580,Q30KJ2,Q5GRG2,Q5RKI1,Q62635               |
| 1753 | 1,2,4,6,8,1<br>2,15,16 | 3,5,7,9,10,<br>11,13,14 | 5  | P15399,P19629,P50280,P97580,Q30KJ2                                    |
| 1754 | 1,2,4,6,8,1<br>3,14,15 | 3,5,7,9,10,<br>11,12,16 | 4  | P15399,P97580,Q30KJ2,Q68G31                                           |
| 1755 | 1,2,4,6,8,1<br>3,14,16 | 3,5,7,9,10,<br>11,12,15 | 10 | B0BNN3,O54728,P07647,P15399,P97580,Q30KJ2,Q5RKI1,Q62635,Q68G31,Q9JI85 |
| 1756 | 1,2,4,6,8,1<br>3,15,16 | 3,5,7,9,10,<br>11,12,14 | 10 | O55004,P01015,P07151,P15399,P19629,P50280,P97580,Q30KJ2,Q68G31,Q9JI85 |
| 1757 | 1,2,4,6,8,1<br>4,15,16 | 3,5,7,9,10,<br>11,12,13 | 7  | P15399,P20762,P47967,P50280,P54921,P97580,Q30KJ2                      |
| 1758 | 1,2,4,6,9,1<br>0,11,12 | 3,5,7,8,13,<br>14,15,16 | 2  | O35077,Q62714                                                         |
| 1759 | 1,2,4,6,9,1<br>0,11,13 | 3,5,7,8,12,<br>14,15,16 | 2  | D3ZUC6,Q68G31                                                         |
| 1760 | 1,2,4,6,9,1<br>0,11,14 | 3,5,7,8,12,<br>13,15,16 | 0  |                                                                       |
| 1761 | 1,2,4,6,9,1<br>0,11,15 | 3,5,7,8,12,<br>13,14,16 | 2  | Q811M5,Q99MH3                                                         |
| 1762 | 1,2,4,6,9,1<br>0,11,16 | 3,5,7,8,12,<br>13,14,15 | 2  | D3ZUC6,P22006                                                         |
| 1763 | 1,2,4,6,9,1<br>0,12,13 | 3,5,7,8,11,<br>14,15,16 | 0  |                                                                       |
| 1764 | 1,2,4,6,9,1<br>0,12,14 | 3,5,7,8,11,<br>13,15,16 | 1  | P01041                                                                |
| 1765 | 1,2,4,6,9,1<br>0,12,15 | 3,5,7,8,11,<br>13,14,16 | 2  | Q811M5,Q99MH3                                                         |
| 1766 | 1,2,4,6,9,1<br>0,12,16 | 3,5,7,8,11,<br>13,14,15 | 1  | D3ZUC6                                                                |
| 1767 | 1,2,4,6,9,1<br>0,13,14 | 3,5,7,8,11,<br>12,15,16 | 0  |                                                                       |

|      |                        |                         |   |                                           |
|------|------------------------|-------------------------|---|-------------------------------------------|
| 1768 | 1,2,4,6,9,1<br>0,13,15 | 3,5,7,8,11,<br>12,14,16 | 2 | P11883,Q811M5                             |
| 1769 | 1,2,4,6,9,1<br>0,13,16 | 3,5,7,8,11,<br>12,14,15 | 3 | D3ZUC6,P11883,Q9EQS0                      |
| 1770 | 1,2,4,6,9,1<br>0,14,15 | 3,5,7,8,11,<br>12,13,16 | 3 | P47967,P97840,Q811M5                      |
| 1771 | 1,2,4,6,9,1<br>0,14,16 | 3,5,7,8,11,<br>12,13,15 | 2 | D3ZUC6,P47967                             |
| 1772 | 1,2,4,6,9,1<br>0,15,16 | 3,5,7,8,11,<br>12,13,14 | 4 | D3ZUC6,P11883,P47967,Q811M5               |
| 1773 | 1,2,4,6,9,1<br>1,12,13 | 3,5,7,8,10,<br>14,15,16 | 3 | O35077,Q5RKI1,Q62761;Q62762;Q62763        |
| 1774 | 1,2,4,6,9,1<br>1,12,14 | 3,5,7,8,10,<br>13,15,16 | 2 | O35077,Q5RKI1                             |
| 1775 | 1,2,4,6,9,1<br>1,12,15 | 3,5,7,8,10,<br>13,14,16 | 2 | O35077,Q99MH3                             |
| 1776 | 1,2,4,6,9,1<br>1,12,16 | 3,5,7,8,10,<br>13,14,15 | 4 | D3ZUC6,P07647,P22006,Q5RKI1               |
| 1777 | 1,2,4,6,9,1<br>1,13,14 | 3,5,7,8,10,<br>12,15,16 | 3 | P0DMW0;P0DMW1,P12368,Q5RKI1               |
| 1778 | 1,2,4,6,9,1<br>1,13,15 | 3,5,7,8,10,<br>12,14,16 | 0 |                                           |
| 1779 | 1,2,4,6,9,1<br>1,13,16 | 3,5,7,8,10,<br>12,14,15 | 6 | D3ZUC6,P07647,P22006,Q5RKI1,Q9EQS0,Q9R168 |
| 1780 | 1,2,4,6,9,1<br>1,14,15 | 3,5,7,8,10,<br>12,13,16 | 2 | P0DMW0;P0DMW1,P47967                      |
| 1781 | 1,2,4,6,9,1<br>1,14,16 | 3,5,7,8,10,<br>12,13,15 | 6 | D3ZUC6,P07647,P22006,Q4KLZ6,Q5RKI1,Q9R168 |
| 1782 | 1,2,4,6,9,1<br>1,15,16 | 3,5,7,8,10,<br>12,13,14 | 3 | D3ZUC6,P22006,Q8CJ52                      |
| 1783 | 1,2,4,6,9,1<br>2,13,14 | 3,5,7,8,10,<br>11,15,16 | 2 | O35077,Q5RKI1                             |
| 1784 | 1,2,4,6,9,1<br>2,13,15 | 3,5,7,8,10,<br>11,14,16 | 0 |                                           |
| 1785 | 1,2,4,6,9,1<br>2,13,16 | 3,5,7,8,10,<br>11,14,15 | 3 | D3ZUC6,Q5RKI1,Q9EQS0                      |
| 1786 | 1,2,4,6,9,1<br>2,14,15 | 3,5,7,8,10,<br>11,13,16 | 1 | P47967                                    |
| 1787 | 1,2,4,6,9,1<br>2,14,16 | 3,5,7,8,10,<br>11,13,15 | 2 | D3ZUC6,Q5RKI1                             |

|      |                         |                         |                                             |
|------|-------------------------|-------------------------|---------------------------------------------|
| 1788 | 1,2,4,6,9,1<br>2,15,16  | 3,5,7,8,10,<br>11,13,14 | 1 D3ZUC6                                    |
| 1789 | 1,2,4,6,9,1<br>3,14,15  | 3,5,7,8,10,<br>11,12,16 | 2 P0DMW0;P0DMW1,P47967                      |
| 1790 | 1,2,4,6,9,1<br>3,14,16  | 3,5,7,8,10,<br>11,12,15 | 6 D3ZUC6,P22006,P23593,Q5RKI1,Q9EQS0,Q9R168 |
| 1791 | 1,2,4,6,9,1<br>3,15,16  | 3,5,7,8,10,<br>11,12,14 | 4 D3ZUC6,P11883,P22006,Q9EQS0               |
| 1792 | 1,2,4,6,9,1<br>4,15,16  | 3,5,7,8,10,<br>11,12,13 | 6 D3ZUC6,P22006,P23593,P47967,P97840,Q5I0D1 |
| 1793 | 1,2,4,6,10,<br>11,12,13 | 3,5,7,8,9,1<br>4,15,16  | 2 P35280,Q68G31                             |
| 1794 | 1,2,4,6,10,<br>11,12,14 | 3,5,7,8,9,1<br>3,15,16  | 1 P35280                                    |
| 1795 | 1,2,4,6,10,<br>11,12,15 | 3,5,7,8,9,1<br>3,14,16  | 0                                           |
| 1796 | 1,2,4,6,10,<br>11,12,16 | 3,5,7,8,9,1<br>3,14,15  | 3 D3ZUC6,P07647,P35280                      |
| 1797 | 1,2,4,6,10,<br>11,13,14 | 3,5,7,8,9,1<br>2,15,16  | 2 P35280,Q68G31                             |
| 1798 | 1,2,4,6,10,<br>11,13,15 | 3,5,7,8,9,1<br>2,14,16  | 1 Q68G31                                    |
| 1799 | 1,2,4,6,10,<br>11,13,16 | 3,5,7,8,9,1<br>2,14,15  | 4 D3ZUC6,P07647,P35280,Q68G31               |
| 1800 | 1,2,4,6,10,<br>11,14,15 | 3,5,7,8,9,1<br>2,13,16  | 0                                           |
| 1801 | 1,2,4,6,10,<br>11,14,16 | 3,5,7,8,9,1<br>2,13,15  | 3 P07647,P35280,Q4KLZ6                      |
| 1802 | 1,2,4,6,10,<br>11,15,16 | 3,5,7,8,9,1<br>2,13,14  | 2 D3ZUC6,P17988                             |
| 1803 | 1,2,4,6,10,<br>12,13,14 | 3,5,7,8,9,1<br>1,15,16  | 1 P35280                                    |
| 1804 | 1,2,4,6,10,<br>12,13,15 | 3,5,7,8,9,1<br>1,14,16  | 1 P35280                                    |
| 1805 | 1,2,4,6,10,<br>12,13,16 | 3,5,7,8,9,1<br>1,14,15  | 2 D3ZUC6,P35280                             |
| 1806 | 1,2,4,6,10,<br>12,14,15 | 3,5,7,8,9,1<br>1,13,16  | 2 P35280,P54921                             |
| 1807 | 1,2,4,6,10,<br>12,14,16 | 3,5,7,8,9,1<br>1,13,15  | 2 P35280,Q9QYP1                             |



|      |                                             |                                                    |
|------|---------------------------------------------|----------------------------------------------------|
| 1808 | 1,2,4,6,10, 3,5,7,8,9,1<br>12,15,16 1,13,14 | 4 D3ZUC6,P10758,P35280,Q9QYP1                      |
| 1809 | 1,2,4,6,10, 3,5,7,8,9,1<br>13,14,15 1,12,16 | 3 O88797,P35280,Q68G31                             |
| 1810 | 1,2,4,6,10, 3,5,7,8,9,1<br>13,14,16 1,12,15 | 3 P14668,P35280,Q9QYP1                             |
| 1811 | 1,2,4,6,10, 3,5,7,8,9,1<br>13,15,16 1,12,14 | 4 D3ZUC6,P11883,P35280,Q9QYP1                      |
| 1812 | 1,2,4,6,10, 3,5,7,8,9,1<br>14,15,16 1,12,13 | 4 P35280,P47967,P54921,Q9QYP1                      |
| 1813 | 1,2,4,6,11, 3,5,7,8,9,1<br>12,13,14 0,15,16 | 3 P35280,Q5GRG2,Q5RKI1                             |
| 1814 | 1,2,4,6,11, 3,5,7,8,9,1<br>12,13,15 0,14,16 | 0                                                  |
| 1815 | 1,2,4,6,11, 3,5,7,8,9,1<br>12,13,16 0,14,15 | 5 O35547,P05369,P07647,P35280,Q5RKI1               |
| 1816 | 1,2,4,6,11, 3,5,7,8,9,1<br>12,14,15 0,13,16 | 0                                                  |
| 1817 | 1,2,4,6,11, 3,5,7,8,9,1<br>12,14,16 0,13,15 | 5 P07647,P35280,Q4KLZ6,Q5GRG2,Q5RKI1               |
| 1818 | 1,2,4,6,11, 3,5,7,8,9,1<br>12,15,16 0,13,14 | 1 P07647                                           |
| 1819 | 1,2,4,6,11, 3,5,7,8,9,1<br>13,14,15 0,12,16 | 1 Q68G31                                           |
| 1820 | 1,2,4,6,11, 3,5,7,8,9,1<br>13,14,16 0,12,15 | 7 O54728,P07647,P12368,P35280,Q4KLZ6,Q5RKI1,Q9EQS0 |
| 1821 | 1,2,4,6,11, 3,5,7,8,9,1<br>13,15,16 0,12,14 | 2 P07647,Q9EQS0                                    |
| 1822 | 1,2,4,6,11, 3,5,7,8,9,1<br>14,15,16 0,12,13 | 3 P07647,Q4KLZ6,Q8CJ52                             |
| 1823 | 1,2,4,6,12, 3,5,7,8,9,1<br>13,14,15 0,11,16 | 1 P35280                                           |
| 1824 | 1,2,4,6,12, 3,5,7,8,9,1<br>13,14,16 0,11,15 | 2 P35280,Q5RKI1                                    |
| 1825 | 1,2,4,6,12, 3,5,7,8,9,1<br>13,15,16 0,11,14 | 1 P35280                                           |
| 1826 | 1,2,4,6,12, 3,5,7,8,9,1<br>14,15,16 0,11,13 | 1 P35280                                           |
| 1827 | 1,2,4,6,13, 3,5,7,8,9,1<br>14,15,16 0,11,12 | 2 P01835,P35280                                    |

|      |                       |                          |            |                                                                                                                                                                  |
|------|-----------------------|--------------------------|------------|------------------------------------------------------------------------------------------------------------------------------------------------------------------|
| 1828 | 1,2,4,7,8,9<br>,10,11 | 3,5,6,12,1<br>3,14,15,16 | 8          | P08723,P20646,P70545,Q63493,Q66H69,Q6P6R2,Q812E4,Q9Z1F2                                                                                                          |
| 1829 | 1,2,4,7,8,9<br>,10,12 | 3,5,6,11,1<br>3,14,15,16 | 3          | iRT-Kit_WR_fusion,Q66H69,Q9Z1F2                                                                                                                                  |
| 1830 | 1,2,4,7,8,9<br>,10,13 | 3,5,6,11,1<br>2,14,15,16 | 7          | D4A5U3,O55004,P20646,P80299,Q63618,Q66H69,Q9Z1F2                                                                                                                 |
| 1831 | 1,2,4,7,8,9<br>,10,14 | 3,5,6,11,1<br>2,13,15,16 | 2          | P20646,Q9Z1F2                                                                                                                                                    |
| 1832 | 1,2,4,7,8,9<br>,10,15 | 3,5,6,11,1<br>2,13,14,16 | 5          | P20646,Q63474,Q63598,Q9Z0V6,Q9Z1F2                                                                                                                               |
| 1833 | 1,2,4,7,8,9<br>,10,16 | 3,5,6,11,1<br>2,13,14,15 | 6          | D3ZUC6,O55004,P20646,P70545,Q30KJ2,Q63598                                                                                                                        |
| 1834 | 1,2,4,7,8,9<br>,11,12 | 3,5,6,10,1<br>3,14,15,16 | iRT-<br>13 | Kit_WR_fusion,P02780,P06911,P08723,P36374,P40241,Q5GRG2,Q63493,Q66H69,Q6Q7Y5,Q812E4,Q9JHB9,Q9Z1F2                                                                |
| 1835 | 1,2,4,7,8,9<br>,11,13 | 3,5,6,10,1<br>2,14,15,16 | 10         | D4A5U3,P08723,P09456,P20646,P40241,Q63493,Q66H69,Q6AYR9,Q812E4,Q9Z1F2                                                                                            |
| 1836 | 1,2,4,7,8,9<br>,11,14 | 3,5,6,10,1<br>2,13,15,16 | 10         | D4A5U3,P07150,P08723,P20646,Q5GRG2,Q62635,Q63493,Q6AYR9,Q812E4,Q9Z1F2                                                                                            |
| 1837 | 1,2,4,7,8,9<br>,11,15 | 3,5,6,10,1<br>2,13,14,16 | iRT-<br>15 | Kit_WR_fusion,P08723,P20646,P50280,Q10758,Q63493,Q6AYR9,Q6IFU8,Q6IMF3,Q6P6Q2,Q6P6S4,Q812E4,Q8CJ52,Q9Z0V6,Q9Z1F2                                                  |
| 1838 | 1,2,4,7,8,9<br>,11,16 | 3,5,6,10,1<br>2,13,14,15 | iRT-<br>22 | Kit_WR_fusion,P02780,P02781,P02782,P04905,P07647,P08723,P09456,P0C0A9,P20646,P22283,P24368,P30120,P36374,P40241,P50280,P60905,P97523,Q5M8C6,Q63493,Q812E4,Q9JHB9 |
| 1839 | 1,2,4,7,8,9<br>,12,13 | 3,5,6,10,1<br>1,14,15,16 | 3          | iRT-Kit_WR_fusion,Q66H69,Q9Z1F2                                                                                                                                  |
| 1840 | 1,2,4,7,8,9<br>,12,14 | 3,5,6,10,1<br>1,13,15,16 | 3          | iRT-Kit_WR_fusion,Q62635,Q9Z1F2                                                                                                                                  |
| 1841 | 1,2,4,7,8,9<br>,12,15 | 3,5,6,10,1<br>1,13,14,16 | 4          | iRT-Kit_WR_fusion,P20646,Q9Z0V6,Q9Z1F2                                                                                                                           |
| 1842 | 1,2,4,7,8,9<br>,12,16 | 3,5,6,10,1<br>1,13,14,15 | 2          | iRT-Kit_WR_fusion,P20646                                                                                                                                         |
| 1843 | 1,2,4,7,8,9<br>,13,14 | 3,5,6,10,1<br>1,12,15,16 | 5          | B0BNN3,D4A5U3,P20646,Q62635,Q9Z1F2                                                                                                                               |
| 1844 | 1,2,4,7,8,9<br>,13,15 | 3,5,6,10,1<br>1,12,14,16 | 3          | P20646,Q9Z0V6,Q9Z1F2                                                                                                                                             |
| 1845 | 1,2,4,7,8,9<br>,13,16 | 3,5,6,10,1<br>1,12,14,15 | 3          | B0BNN3,D4A5U3,P20646                                                                                                                                             |
| 1846 | 1,2,4,7,8,9<br>,14,15 | 3,5,6,10,1<br>1,12,13,16 | 4          | P20646,Q62635,Q9Z0V6,Q9Z1F2                                                                                                                                      |

|      |                        |                          |    |                                                                                                                                                                                                                                                      |
|------|------------------------|--------------------------|----|------------------------------------------------------------------------------------------------------------------------------------------------------------------------------------------------------------------------------------------------------|
| 1847 | 1,2,4,7,8,9<br>,14,16  | 3,5,6,10,1<br>1,12,13,15 | 3  | D4A5U3,P20646,Q62635                                                                                                                                                                                                                                 |
| 1848 | 1,2,4,7,8,9<br>,15,16  | 3,5,6,10,1<br>1,12,13,14 | 3  | iRT-Kit_WR_fusion,P20646,Q9Z0V6                                                                                                                                                                                                                      |
| 1849 | 1,2,4,7,8,1<br>0,11,12 | 3,5,6,9,13,<br>14,15,16  | 10 | iRT-Kit_WR_fusion,P02780,P08723,P36374,P40241,Q5GRG2,Q63493,Q66H69,Q9JHB9,Q9Z1F2                                                                                                                                                                     |
| 1850 | 1,2,4,7,8,1<br>0,11,13 | 3,5,6,9,12,<br>14,15,16  | 6  | P08723,P40241,Q63493,Q66H69,Q8CIZ5,Q9Z1F2                                                                                                                                                                                                            |
| 1851 | 1,2,4,7,8,1<br>0,11,14 | 3,5,6,9,12,<br>13,15,16  | 6  | P08723,Q4G075,Q5GRG2,Q62635,Q66H69,Q9Z1F2                                                                                                                                                                                                            |
| 1852 | 1,2,4,7,8,1<br>0,11,15 | 3,5,6,9,12,<br>13,14,16  | 13 | P08723,P20646,P50280,Q10758,Q4FZU2,Q63493,Q66H69,Q6IFU8,Q6IMF3,Q6P6Q2,Q8CJ52,Q9Z0V6,Q9Z1F2                                                                                                                                                           |
| 1853 | 1,2,4,7,8,1<br>0,11,16 | 3,5,6,9,12,<br>13,14,15  | 23 | O55004,P02780,P02781,P02782,P04905,P07647,P08723,P09456,P0C0A9,P22282,P22283,P24368,P30120,P36374,P40241,P50280,Q00715,Q30KJ2,Q5M8C6,Q63493,Q66H69,Q9JHB9,Q9WTW7                                                                                     |
| 1854 | 1,2,4,7,8,1<br>0,12,13 | 3,5,6,9,11,<br>14,15,16  | 7  | O55004,P80299,Q63598,Q63618,Q66H69,Q8CIZ5,Q9Z1F2                                                                                                                                                                                                     |
| 1855 | 1,2,4,7,8,1<br>0,12,14 | 3,5,6,9,11,<br>13,15,16  | 4  | Q5RLM2,Q62635,Q66H69,Q9Z1F2                                                                                                                                                                                                                          |
| 1856 | 1,2,4,7,8,1<br>0,12,15 | 3,5,6,9,11,<br>13,14,16  | 7  | iRT-Kit_WR_fusion,P10758,Q63474,Q63598,Q66H69,Q9Z0V6,Q9Z1F2                                                                                                                                                                                          |
| 1857 | 1,2,4,7,8,1<br>0,12,16 | 3,5,6,9,11,<br>13,14,15  | 11 | iRT-Kit_WR_fusion,O55004,P10758,P46844,Q30KJ2,Q3ZAV1,Q63598,Q64093,Q66H69,Q9JJ40,Q9WTW7                                                                                                                                                              |
| 1858 | 1,2,4,7,8,1<br>0,13,14 | 3,5,6,9,11,<br>12,15,16  | 11 | B0BNN3,O55004,P19223,P25809,P80299,P97580,Q62635,Q63618,Q66H69,Q8CIZ5,Q9Z1F2                                                                                                                                                                         |
| 1859 | 1,2,4,7,8,1<br>0,13,15 | 3,5,6,9,11,<br>12,14,16  | 12 | O55004,P19468,P51907,P80299,Q63424,Q63474,Q63598,Q63618,Q64093,Q66H69,Q6Q0N1,Q9Z1F2                                                                                                                                                                  |
| 1860 | 1,2,4,7,8,1<br>0,13,16 | 3,5,6,9,11,<br>12,14,15  | 19 | B0BNN3,O55004,O70257,P07151,P19223,P19468,P28570,P46844,P51907,Q30KJ2,Q3ZAV1,Q63424,Q63598,Q63618,Q64093,Q66H69,Q6AYQ8,Q6Q0N1,Q9WTW7                                                                                                                 |
| 1861 | 1,2,4,7,8,1<br>0,14,15 | 3,5,6,9,11,<br>12,13,16  | 5  | P20646,P20762,P54921,Q63474,Q9Z1F2                                                                                                                                                                                                                   |
| 1862 | 1,2,4,7,8,1<br>0,14,16 | 3,5,6,9,11,<br>12,13,15  | 10 | O55004,P07151,P20646,P20762,P57113,P97580,Q30KJ2,Q63424,Q64093,Q9QYP1                                                                                                                                                                                |
| 1863 | 1,2,4,7,8,1<br>0,15,16 | 3,5,6,9,11,<br>12,13,14  | 35 | B2RYW9,O55004,O70377,O70594,P07151,P10758,P19468,P20646,P20762,P46844,P48508,P51907,P53790,Q03248,Q05175,Q30KJ2,Q3ZAV1,Q5I0E9,Q5M7T9,Q63355,Q63424,Q63598,Q63618,Q64093,Q66H69,Q6AYQ8,Q6Q0N1,Q80W57,Q8R431,Q9JJ40,Q9QYP1,Q9R1T5,Q9WTW7,Q9Z0V6,Q9Z0W7 |
| 1864 | 1,2,4,7,8,1<br>1,12,13 | 3,5,6,9,10,<br>14,15,16  | 17 | iRT-Kit_WR_fusion,P02780,P02781,P02782,P06911,P08723,P22282,P36374,P40241,Q5GRG2,Q63493,Q66H69,Q811M5,Q8CIZ5,Q9JHB9,Q9JI85,Q9Z1F2                                                                                                                    |

1865 1,2,4,7,8,1 3,5,6,9,10,  
1,12,14 13,15,16

1866 1,2,4,7,8,1 3,5,6,9,10,  
1,12,15 13,14,16

1867 1,2,4,7,8,1 3,5,6,9,10,  
1,12,16 13,14,15

1868 1,2,4,7,8,1 3,5,6,9,10,  
1,13,14 12,15,16

1869 1,2,4,7,8,1 3,5,6,9,10,  
1,13,15 12,14,16

1870 1,2,4,7,8,1 3,5,6,9,10,  
1,13,16 12,14,15

1871 1,2,4,7,8,1 3,5,6,9,10,  
1,14,15 12,13,16

1872 1,2,4,7,8,1 3,5,6,9,10,  
1,14,16 12,13,15

1873 1,2,4,7,8,1 3,5,6,9,10,  
1,15,16 12,13,14

1874 1,2,4,7,8,1 3,5,6,9,10,  
2,13,14 11,15,16

1875 1,2,4,7,8,1 3,5,6,9,10,  
2,13,15 11,14,16

1876 1,2,4,7,8,1 3,5,6,9,10,  
2,13,16 11,14,15

1877 1,2,4,7,8,1 3,5,6,9,10,  
2,14,15 11,13,16

1878 1,2,4,7,8,1 3,5,6,9,10,  
2,14,16 11,13,15

1879 1,2,4,7,8,1 3,5,6,9,10,  
2,15,16 11,13,14

1880 1,2,4,7,8,1 3,5,6,9,10,  
3,14,15 11,12,16

1881 1,2,4,7,8,1 3,5,6,9,10,  
3,14,16 11,12,15

iRT-  
18 Kit\_WR\_fusion,P02780,P02781,P06911,P08723,P11883,P12020,P36374,P40241,Q4G075,Q5GRG  
2,Q62635,Q63493,Q66H69,Q811M5,Q812E4,Q9JHB9,Q9Z1F2

iRT-  
16 Kit\_WR\_fusion,P02780,P08723,P36374,P40241,P50280,Q10758,Q5GRG2,Q63493,Q66H69,Q6IF  
U8,Q6IMF3,Q6P6Q2,Q8CJ52,Q9JHB9,Q9Z1F2

iRT-  
28 Kit\_WR\_fusion,O35547,P02780,P02781,P02782,P04905,P06911,P07647,P08723,P09456,P0C0A9,  
P22282,P22283,P24368,P30120,P36374,P40241,P46462,P50280,P60905,P97523,Q00715,Q5GR  
G2,Q5M8C6,Q63493,Q66H69,Q812E4,Q9JHB9

16 B0BNN3,D4A5U3,O54728,P02781,P02782,P08723,Q4G075,Q5GRG2,Q62635,Q63493,Q66H69,  
Q6AYR9,Q811M5,Q812E4,Q8CIZ5,Q9Z1F2

15 P08723,P36374,P40241,P50280,Q10758,Q4FZU2,Q4G075,Q63493,Q66H69,Q6AYR9,Q6IFU8,Q6  
IMF3,Q6P6Q2,Q8CJ52,Q9Z1F2

29 B0BNN3,O35547,P02761,P02780,P02781,P02782,P04905,P05369,P07647,P08723,P09456,P0C0  
A9,P22282,P22283,P24368,P30120,P36374,P40241,P46462,P50280,P60905,Q4G075,Q5M8C6,Q  
63493,Q66H69,Q6AYQ8,Q812E4,Q9JHB9,Q9JI85

14 P08723,P0C0A9,P50280,Q10758,Q4FZU2,Q4G075,Q5GRG2,Q62635,Q63493,Q6IFU8,Q6IMF3,Q  
6P6Q2,Q8CJ52,Q9Z1F2

26 B0BNN3,O54728,P02761,P02780,P02781,P02782,P04905,P07647,P08723,P09456,P0C0A9,P222  
82,P22283,P30120,P36374,P40241,P46462,P50280,Q00715,Q4G075,Q5GRG2,Q5M8C6,Q62635,  
Q63493,Q812E4,Q9JHB9

28 B2RYW9,P02780,P02781,P02782,P04905,P07647,P08723,P09456,P0C0A9,P20646,P22283,P2436  
8,P30120,P36374,P40241,P50280,Q10758,Q4FZU2,Q4G075,Q5M8C6,Q63493,Q66H69,Q6AYQ8  
,Q6IFU8,Q6IMF3,Q6P6Q2,Q8CJ52,Q9JHB9

7 B0BNN3,Q62635,Q66H69,Q811M5,Q8CIZ5,Q9Z1F2,Q9Z2L0

4 iRT-Kit\_WR\_fusion,Q66H69,Q9Z1F2,Q9Z2L0

6 B0BNN3,iRT-Kit\_WR\_fusion,P02781,P02782,P30120,Q66H69

3 iRT-Kit\_WR\_fusion,Q62635,Q9Z1F2

2 iRT-Kit\_WR\_fusion,Q62635

3 iRT-Kit\_WR\_fusion,P10758,Q66H69

6 B0BNN3,Q62635,Q66H69,Q8CIZ5,Q9Z1F2,Q9Z2L0

11 B0BNN3,D4A5U3,O54728,P02761,P02781,Q30KJ2,Q62635,Q66H69,Q6TMA8,Q9WUW8,Q9Z2L  
0

|      |                        |                         |   |                                                         |
|------|------------------------|-------------------------|---|---------------------------------------------------------|
| 1882 | 1,2,4,7,8,1<br>3,15,16 | 3,5,6,9,10,<br>11,12,14 | 8 | B0BNN3,B2RYW9,P01015,P02761,P04916,P20646,Q66H69,Q6AYQ8 |
| 1883 | 1,2,4,7,8,1<br>4,15,16 | 3,5,6,9,10,<br>11,12,13 | 7 | B0BNN3,P02761,P20646,P20762,Q30KJ2,Q62635,Q6TMA8        |
| 1884 | 1,2,4,7,9,1<br>0,11,12 | 3,5,6,8,13,<br>14,15,16 | 3 | Q03191,Q62714,Q62761;Q62762;Q62763                      |
| 1885 | 1,2,4,7,9,1<br>0,11,13 | 3,5,6,8,12,<br>14,15,16 | 3 | P80299,Q9R168,Q9Z1F2                                    |
| 1886 | 1,2,4,7,9,1<br>0,11,14 | 3,5,6,8,12,<br>13,15,16 | 2 | Q9R168,Q9Z1F2                                           |
| 1887 | 1,2,4,7,9,1<br>0,11,15 | 3,5,6,8,12,<br>13,14,16 | 2 | Q9R168,Q9Z1F2                                           |
| 1888 | 1,2,4,7,9,1<br>0,11,16 | 3,5,6,8,12,<br>13,14,15 | 2 | D3ZUC6,Q9R168                                           |
| 1889 | 1,2,4,7,9,1<br>0,12,13 | 3,5,6,8,11,<br>14,15,16 | 2 | P80299,Q9Z1F2                                           |
| 1890 | 1,2,4,7,9,1<br>0,12,14 | 3,5,6,8,11,<br>13,15,16 | 1 | Q9Z1F2                                                  |
| 1891 | 1,2,4,7,9,1<br>0,12,15 | 3,5,6,8,11,<br>13,14,16 | 2 | P10758,Q9Z1F2                                           |
| 1892 | 1,2,4,7,9,1<br>0,12,16 | 3,5,6,8,11,<br>13,14,15 | 2 | D3ZUC6,P10758                                           |
| 1893 | 1,2,4,7,9,1<br>0,13,14 | 3,5,6,8,11,<br>12,15,16 | 3 | P80299,Q9R168,Q9Z1F2                                    |
| 1894 | 1,2,4,7,9,1<br>0,13,15 | 3,5,6,8,11,<br>12,14,16 | 2 | P80299,Q9Z1F2                                           |
| 1895 | 1,2,4,7,9,1<br>0,13,16 | 3,5,6,8,11,<br>12,14,15 | 3 | D3ZUC6,P80299,Q9R168                                    |
| 1896 | 1,2,4,7,9,1<br>0,14,15 | 3,5,6,8,11,<br>12,13,16 | 2 | Q9R168,Q9Z1F2                                           |
| 1897 | 1,2,4,7,9,1<br>0,14,16 | 3,5,6,8,11,<br>12,13,15 | 2 | Q9QYP1,Q9R168                                           |
| 1898 | 1,2,4,7,9,1<br>0,15,16 | 3,5,6,8,11,<br>12,13,14 | 4 | D3ZUC6,P10758,Q9QYP1,Q9R168                             |
| 1899 | 1,2,4,7,9,1<br>1,12,13 | 3,5,6,8,10,<br>14,15,16 | 3 | O35077,Q03191,Q62761;Q62762;Q62763                      |
| 1900 | 1,2,4,7,9,1<br>1,12,14 | 3,5,6,8,10,<br>13,15,16 | 2 | O35077,Q62761;Q62762;Q62763                             |
| 1901 | 1,2,4,7,9,1<br>1,12,15 | 3,5,6,8,10,<br>13,14,16 | 2 | O35077,Q62761;Q62762;Q62763                             |

|      |                         |                         |                                      |
|------|-------------------------|-------------------------|--------------------------------------|
| 1902 | 1,2,4,7,9,1<br>1,12,16  | 3,5,6,8,10,<br>13,14,15 | 3 D3ZUC6,P63322,Q03191               |
| 1903 | 1,2,4,7,9,1<br>1,13,14  | 3,5,6,8,10,<br>12,15,16 | 2 P0DMW0;P0DMW1,Q9R168               |
| 1904 | 1,2,4,7,9,1<br>1,13,15  | 3,5,6,8,10,<br>12,14,16 | 2 Q8CJ52,Q9R168                      |
| 1905 | 1,2,4,7,9,1<br>1,13,16  | 3,5,6,8,10,<br>12,14,15 | 2 D3ZUC6,Q9R168                      |
| 1906 | 1,2,4,7,9,1<br>1,14,15  | 3,5,6,8,10,<br>12,13,16 | 4 P0DMW0;P0DMW1,P25031,Q8CJ52,Q9R168 |
| 1907 | 1,2,4,7,9,1<br>1,14,16  | 3,5,6,8,10,<br>12,13,15 | 2 Q812E4,Q9R168                      |
| 1908 | 1,2,4,7,9,1<br>1,15,16  | 3,5,6,8,10,<br>12,13,14 | 3 D3ZUC6,Q8CJ52,Q9R168               |
| 1909 | 1,2,4,7,9,1<br>2,13,14  | 3,5,6,8,10,<br>11,15,16 | 0                                    |
| 1910 | 1,2,4,7,9,1<br>2,13,15  | 3,5,6,8,10,<br>11,14,16 | 0                                    |
| 1911 | 1,2,4,7,9,1<br>2,13,16  | 3,5,6,8,10,<br>11,14,15 | 1 D3ZUC6                             |
| 1912 | 1,2,4,7,9,1<br>2,14,15  | 3,5,6,8,10,<br>11,13,16 | 0                                    |
| 1913 | 1,2,4,7,9,1<br>2,14,16  | 3,5,6,8,10,<br>11,13,15 | 0                                    |
| 1914 | 1,2,4,7,9,1<br>2,15,16  | 3,5,6,8,10,<br>11,13,14 | 3 D3ZUC6,P08937,P10758               |
| 1915 | 1,2,4,7,9,1<br>3,14,15  | 3,5,6,8,10,<br>11,12,16 | 2 P0DMW0;P0DMW1,Q9R168               |
| 1916 | 1,2,4,7,9,1<br>3,14,16  | 3,5,6,8,10,<br>11,12,15 | 2 B0BNN3,Q9R168                      |
| 1917 | 1,2,4,7,9,1<br>3,15,16  | 3,5,6,8,10,<br>11,12,14 | 3 D3ZUC6,P08937,Q9R168               |
| 1918 | 1,2,4,7,9,1<br>4,15,16  | 3,5,6,8,10,<br>11,12,13 | 1 Q9R168                             |
| 1919 | 1,2,4,7,10,<br>11,12,13 | 3,5,6,8,9,1<br>4,15,16  | 2 P80299,Q9Z1F2                      |
| 1920 | 1,2,4,7,10,<br>11,12,14 | 3,5,6,8,9,1<br>3,15,16  | 1 Q9Z1F2                             |
| 1921 | 1,2,4,7,10,<br>11,12,15 | 3,5,6,8,9,1<br>3,14,16  | 2 P10758,Q9Z1F2                      |

|      |                                             |                                                           |
|------|---------------------------------------------|-----------------------------------------------------------|
| 1922 | 1,2,4,7,10, 3,5,6,8,9,1<br>11,12,16 3,14,15 | 1 Q9JHB9                                                  |
| 1923 | 1,2,4,7,10, 3,5,6,8,9,1<br>11,13,14 2,15,16 | 3 P80299,Q9R168,Q9Z1F2                                    |
| 1924 | 1,2,4,7,10, 3,5,6,8,9,1<br>11,13,15 2,14,16 | 2 P80299,Q9Z1F2                                           |
| 1925 | 1,2,4,7,10, 3,5,6,8,9,1<br>11,13,16 2,14,15 | 4 P07647,P36376,Q6AYQ8,Q9R168                             |
| 1926 | 1,2,4,7,10, 3,5,6,8,9,1<br>11,14,15 2,13,16 | 1 Q9Z1F2                                                  |
| 1927 | 1,2,4,7,10, 3,5,6,8,9,1<br>11,14,16 2,13,15 | 3 P36376,Q9QYP1,Q9R168                                    |
| 1928 | 1,2,4,7,10, 3,5,6,8,9,1<br>11,15,16 2,13,14 | 4 P17988,Q6AYQ8,Q8CJ52,Q9QYP1                             |
| 1929 | 1,2,4,7,10, 3,5,6,8,9,1<br>12,13,14 1,15,16 | 2 P80299,Q9Z1F2                                           |
| 1930 | 1,2,4,7,10, 3,5,6,8,9,1<br>12,13,15 1,14,16 | 4 O88797,P10758,P80299,Q9Z1F2                             |
| 1931 | 1,2,4,7,10, 3,5,6,8,9,1<br>12,13,16 1,14,15 | 3 P09527,P10758,P80299                                    |
| 1932 | 1,2,4,7,10, 3,5,6,8,9,1<br>12,14,15 1,13,16 | 2 P10758,Q9Z1F2                                           |
| 1933 | 1,2,4,7,10, 3,5,6,8,9,1<br>12,14,16 1,13,15 | 2 P09527,Q9QYP1                                           |
| 1934 | 1,2,4,7,10, 3,5,6,8,9,1<br>12,15,16 1,13,14 | 3 P09527,P10758,Q9QYP1                                    |
| 1935 | 1,2,4,7,10, 3,5,6,8,9,1<br>13,14,15 1,12,16 | 4 O88797,P09527,P80299,Q9Z1F2                             |
| 1936 | 1,2,4,7,10, 3,5,6,8,9,1<br>13,14,16 1,12,15 | 8 B0BNN3,P02761,P09527,P36376,P80299,Q6AYQ8,Q9QYP1,Q9R168 |
| 1937 | 1,2,4,7,10, 3,5,6,8,9,1<br>13,15,16 1,12,14 | 7 P09527,P10758,P19468,P80299,Q64093,Q6AYQ8,Q9QYP1        |
| 1938 | 1,2,4,7,10, 3,5,6,8,9,1<br>14,15,16 1,12,13 | 2 P09527,Q9QYP1                                           |
| 1939 | 1,2,4,7,11, 3,5,6,8,9,1<br>12,13,14 0,15,16 | 1 Q811M5                                                  |
| 1940 | 1,2,4,7,11, 3,5,6,8,9,1<br>12,13,15 0,14,16 | 0                                                         |
| 1941 | 1,2,4,7,11, 3,5,6,8,9,1<br>12,13,16 0,14,15 | 2 P05369,P07647                                           |

|      |                                             |                                                    |
|------|---------------------------------------------|----------------------------------------------------|
| 1942 | 1,2,4,7,11, 3,5,6,8,9,1<br>12,14,15 0,13,16 | 1 P25031                                           |
| 1943 | 1,2,4,7,11, 3,5,6,8,9,1<br>12,14,16 0,13,15 | 2 P07647,Q9JHB9                                    |
| 1944 | 1,2,4,7,11, 3,5,6,8,9,1<br>12,15,16 0,13,14 | 3 P08937,P10758,Q8CJ52                             |
| 1945 | 1,2,4,7,11, 3,5,6,8,9,1<br>13,14,15 0,12,16 | 2 P25031,Q8CJ52                                    |
| 1946 | 1,2,4,7,11, 3,5,6,8,9,1<br>13,14,16 0,12,15 | 7 B0BNN3,O54728,P02761,P07647,P36376,Q6AYQ8,Q9R168 |
| 1947 | 1,2,4,7,11, 3,5,6,8,9,1<br>13,15,16 0,12,14 | 3 P08937,Q6AYQ8,Q8CJ52                             |
| 1948 | 1,2,4,7,11, 3,5,6,8,9,1<br>14,15,16 0,12,13 | 2 Q8CJ52,Q9R168                                    |
| 1949 | 1,2,4,7,12, 3,5,6,8,9,1<br>13,14,15 0,11,16 | 1 O88797                                           |
| 1950 | 1,2,4,7,12, 3,5,6,8,9,1<br>13,14,16 0,11,15 | 0                                                  |
| 1951 | 1,2,4,7,12, 3,5,6,8,9,1<br>13,15,16 0,11,14 | 2 P08937,P10758                                    |
| 1952 | 1,2,4,7,12, 3,5,6,8,9,1<br>14,15,16 0,11,13 | 0                                                  |
| 1953 | 1,2,4,7,13, 3,5,6,8,9,1<br>14,15,16 0,11,12 | 4 B0BNN3,P01835,P02761,Q6AYQ8                      |
| 1954 | 1,2,4,8,9,1 3,5,6,7,13,<br>0,11,12 14,15,16 | 1 Q62714                                           |
| 1955 | 1,2,4,8,9,1 3,5,6,7,12,<br>0,11,13 14,15,16 | 0                                                  |
| 1956 | 1,2,4,8,9,1 3,5,6,7,12,<br>0,11,14 13,15,16 | 0                                                  |
| 1957 | 1,2,4,8,9,1 3,5,6,7,12,<br>0,11,15 13,14,16 | 3 Q10758,Q6IFU8,Q6P6S4                             |
| 1958 | 1,2,4,8,9,1 3,5,6,7,12,<br>0,11,16 13,14,15 | 3 D3ZUC6,Q30KJ2,Q6AY61                             |
| 1959 | 1,2,4,8,9,1 3,5,6,7,11,<br>0,12,13 14,15,16 | 1 Q9Z1F2                                           |
| 1960 | 1,2,4,8,9,1 3,5,6,7,11,<br>0,12,14 13,15,16 | 1 Q9Z1F2                                           |
| 1961 | 1,2,4,8,9,1 3,5,6,7,11,<br>0,12,15 13,14,16 | 1 Q9Z1F2                                           |



|      |                        |                         |                                                    |
|------|------------------------|-------------------------|----------------------------------------------------|
| 1962 | 1,2,4,8,9,1<br>0,12,16 | 3,5,6,7,11,<br>13,14,15 | 2 D3ZUC6,Q30KJ2                                    |
| 1963 | 1,2,4,8,9,1<br>0,13,14 | 3,5,6,7,11,<br>12,15,16 | 1 Q9Z1F2                                           |
| 1964 | 1,2,4,8,9,1<br>0,13,15 | 3,5,6,7,11,<br>12,14,16 | 1 Q9Z1F2                                           |
| 1965 | 1,2,4,8,9,1<br>0,13,16 | 3,5,6,7,11,<br>12,14,15 | 2 D3ZUC6,Q30KJ2                                    |
| 1966 | 1,2,4,8,9,1<br>0,14,15 | 3,5,6,7,11,<br>12,13,16 | 3 P47967,P97840,Q9Z1F2                             |
| 1967 | 1,2,4,8,9,1<br>0,14,16 | 3,5,6,7,11,<br>12,13,15 | 3 P47967,P97580,Q30KJ2                             |
| 1968 | 1,2,4,8,9,1<br>0,15,16 | 3,5,6,7,11,<br>12,13,14 | 2 D3ZUC6,Q30KJ2                                    |
| 1969 | 1,2,4,8,9,1<br>1,12,13 | 3,5,6,7,10,<br>14,15,16 | 1 Q5RKI1                                           |
| 1970 | 1,2,4,8,9,1<br>1,12,14 | 3,5,6,7,10,<br>13,15,16 | 3 Q5RKI1,Q6Q7Y5,Q812E4                             |
| 1971 | 1,2,4,8,9,1<br>1,12,15 | 3,5,6,7,10,<br>13,14,16 | 1 Q6IFU8                                           |
| 1972 | 1,2,4,8,9,1<br>1,12,16 | 3,5,6,7,10,<br>13,14,15 | 6 D3ZUC6,P30120,P60905,Q5RKI1,Q62714,Q812E4        |
| 1973 | 1,2,4,8,9,1<br>1,13,14 | 3,5,6,7,10,<br>12,15,16 | 4 O54728,P0DMW0;P0DMW1,Q5RKI1,Q812E4               |
| 1974 | 1,2,4,8,9,1<br>1,13,15 | 3,5,6,7,10,<br>12,14,16 | 2 Q10758,Q6IFU8                                    |
| 1975 | 1,2,4,8,9,1<br>1,13,16 | 3,5,6,7,10,<br>12,14,15 | 7 D3ZUC6,P02782,P30120,P60905,Q5RKI1,Q6AY61,Q812E4 |
| 1976 | 1,2,4,8,9,1<br>1,14,15 | 3,5,6,7,10,<br>12,13,16 | 3 P0DMW0;P0DMW1,P47967,Q6IFU8                      |
| 1977 | 1,2,4,8,9,1<br>1,14,16 | 3,5,6,7,10,<br>12,13,15 | 3 O54728,Q5RKI1,Q812E4                             |
| 1978 | 1,2,4,8,9,1<br>1,15,16 | 3,5,6,7,10,<br>12,13,14 | 3 D3ZUC6,Q10758,Q6IFU8                             |
| 1979 | 1,2,4,8,9,1<br>2,13,14 | 3,5,6,7,10,<br>11,15,16 | 1 Q5RKI1                                           |
| 1980 | 1,2,4,8,9,1<br>2,13,15 | 3,5,6,7,10,<br>11,14,16 | 0                                                  |
| 1981 | 1,2,4,8,9,1<br>2,13,16 | 3,5,6,7,10,<br>11,14,15 | 2 D3ZUC6,Q5RKI1                                    |

|      |                         |                         |                               |
|------|-------------------------|-------------------------|-------------------------------|
| 1982 | 1,2,4,8,9,1<br>2,14,15  | 3,5,6,7,10,<br>11,13,16 | 0                             |
| 1983 | 1,2,4,8,9,1<br>2,14,16  | 3,5,6,7,10,<br>11,13,15 | 1 Q5RKI1                      |
| 1984 | 1,2,4,8,9,1<br>2,15,16  | 3,5,6,7,10,<br>11,13,14 | 0                             |
| 1985 | 1,2,4,8,9,1<br>3,14,15  | 3,5,6,7,10,<br>11,12,16 | 1 P47967                      |
| 1986 | 1,2,4,8,9,1<br>3,14,16  | 3,5,6,7,10,<br>11,12,15 | 4 B0BNN3,O54728,P23593,Q5RKI1 |
| 1987 | 1,2,4,8,9,1<br>3,15,16  | 3,5,6,7,10,<br>11,12,14 | 2 D3ZUC6,P23593               |
| 1988 | 1,2,4,8,9,1<br>4,15,16  | 3,5,6,7,10,<br>11,12,13 | 4 P23593,P47967,P97840,Q5I0D1 |
| 1989 | 1,2,4,8,10,<br>11,12,13 | 3,5,6,7,9,1<br>4,15,16  | 1 Q66H69                      |
| 1990 | 1,2,4,8,10,<br>11,12,14 | 3,5,6,7,9,1<br>3,15,16  | 0                             |
| 1991 | 1,2,4,8,10,<br>11,12,15 | 3,5,6,7,9,1<br>3,14,16  | 2 Q10758,Q6IFU8               |
| 1992 | 1,2,4,8,10,<br>11,12,16 | 3,5,6,7,9,1<br>3,14,15  | 1 P30120                      |
| 1993 | 1,2,4,8,10,<br>11,13,14 | 3,5,6,7,9,1<br>2,15,16  | 2 O54728,Q68G31               |
| 1994 | 1,2,4,8,10,<br>11,13,15 | 3,5,6,7,9,1<br>2,14,16  | 3 Q10758,Q68G31,Q6IFU8        |
| 1995 | 1,2,4,8,10,<br>11,13,16 | 3,5,6,7,9,1<br>2,14,15  | 3 P02782,P30120,Q30KJ2        |
| 1996 | 1,2,4,8,10,<br>11,14,15 | 3,5,6,7,9,1<br>2,13,16  | 2 Q10758,Q6IFU8               |
| 1997 | 1,2,4,8,10,<br>11,14,16 | 3,5,6,7,9,1<br>2,13,15  | 4 O54728,P30120,P97580,Q30KJ2 |
| 1998 | 1,2,4,8,10,<br>11,15,16 | 3,5,6,7,9,1<br>2,13,14  | 4 P15399,Q10758,Q30KJ2,Q6IFU8 |
| 1999 | 1,2,4,8,10,<br>12,13,14 | 3,5,6,7,9,1<br>1,15,16  | 1 Q9Z1F2                      |
| 2000 | 1,2,4,8,10,<br>12,13,15 | 3,5,6,7,9,1<br>1,14,16  | 1 Q9Z1F2                      |
| 2001 | 1,2,4,8,10,<br>12,13,16 | 3,5,6,7,9,1<br>1,14,15  | 1 Q30KJ2                      |

|      |                                             |                                             |
|------|---------------------------------------------|---------------------------------------------|
| 2002 | 1,2,4,8,10, 3,5,6,7,9,1<br>12,14,15 1,13,16 | 2 P54921,Q9Z1F2                             |
| 2003 | 1,2,4,8,10, 3,5,6,7,9,1<br>12,14,16 1,13,15 | 2 P97580,Q30KJ2                             |
| 2004 | 1,2,4,8,10, 3,5,6,7,9,1<br>12,15,16 1,13,14 | 2 P10758,Q30KJ2                             |
| 2005 | 1,2,4,8,10, 3,5,6,7,9,1<br>13,14,15 1,12,16 | 2 P97580,Q9Z1F2                             |
| 2006 | 1,2,4,8,10, 3,5,6,7,9,1<br>13,14,16 1,12,15 | 4 B0BNN3,O54728,P97580,Q30KJ2               |
| 2007 | 1,2,4,8,10, 3,5,6,7,9,1<br>13,15,16 1,12,14 | 1 Q30KJ2                                    |
| 2008 | 1,2,4,8,10, 3,5,6,7,9,1<br>14,15,16 1,12,13 | 5 P15399,P54921,P97580,Q30KJ2,Q9QYP1        |
| 2009 | 1,2,4,8,11, 3,5,6,7,9,1<br>12,13,14 0,15,16 | 3 O54728,Q5RKI1,Q811M5                      |
| 2010 | 1,2,4,8,11, 3,5,6,7,9,1<br>12,13,15 0,14,16 | 2 Q10758,Q6IFU8                             |
| 2011 | 1,2,4,8,11, 3,5,6,7,9,1<br>12,13,16 0,14,15 | 5 P02782,P30120,P36374,P60905,Q5RKI1        |
| 2012 | 1,2,4,8,11, 3,5,6,7,9,1<br>12,14,15 0,13,16 | 1 Q6IFU8                                    |
| 2013 | 1,2,4,8,11, 3,5,6,7,9,1<br>12,14,16 0,13,15 | 4 O54728,P02782,P30120,Q5RKI1               |
| 2014 | 1,2,4,8,11, 3,5,6,7,9,1<br>12,15,16 0,13,14 | 5 P02782,P30120,P36374,Q10758,Q6IFU8        |
| 2015 | 1,2,4,8,11, 3,5,6,7,9,1<br>13,14,15 0,12,16 | 5 B0BNN3,O54728,O54861,Q10758,Q6IFU8        |
| 2016 | 1,2,4,8,11, 3,5,6,7,9,1<br>13,14,16 0,12,15 | 6 B0BNN3,O54728,O54861,P02782,P30120,Q5RKI1 |
| 2017 | 1,2,4,8,11, 3,5,6,7,9,1<br>13,15,16 0,12,14 | 6 O54861,P02782,P30120,Q10758,Q6IFU8,Q6P6Q2 |
| 2018 | 1,2,4,8,11, 3,5,6,7,9,1<br>14,15,16 0,12,13 | 4 O54728,Q10758,Q6IFU8,Q6P6Q2               |
| 2019 | 1,2,4,8,12, 3,5,6,7,9,1<br>13,14,15 0,11,16 | 0                                           |
| 2020 | 1,2,4,8,12, 3,5,6,7,9,1<br>13,14,16 0,11,15 | 3 B0BNN3,O54728,Q5RKI1                      |
| 2021 | 1,2,4,8,12, 3,5,6,7,9,1<br>13,15,16 0,11,14 | 0                                           |

|      |                                             |                                      |
|------|---------------------------------------------|--------------------------------------|
| 2022 | 1,2,4,8,12, 3,5,6,7,9,1<br>14,15,16 0,11,13 | 0                                    |
| 2023 | 1,2,4,8,13, 3,5,6,7,9,1<br>14,15,16 0,11,12 | 4 B0BNN3,O54728,P01015,Q30KJ2        |
| 2024 | 1,2,4,9,10, 3,5,6,7,8,1<br>11,12,13 4,15,16 | 3 O35077,Q62714,Q62761;Q62762;Q62763 |
| 2025 | 1,2,4,9,10, 3,5,6,7,8,1<br>11,12,14 3,15,16 | 3 O35077,Q62714,Q62761;Q62762;Q62763 |
| 2026 | 1,2,4,9,10, 3,5,6,7,8,1<br>11,12,15 3,14,16 | 3 P08937,Q62714,Q62761;Q62762;Q62763 |
| 2027 | 1,2,4,9,10, 3,5,6,7,8,1<br>11,12,16 3,14,15 | 3 D3ZUC6,P08937,Q62714               |
| 2028 | 1,2,4,9,10, 3,5,6,7,8,1<br>11,13,14 2,15,16 | 1 Q9R168                             |
| 2029 | 1,2,4,9,10, 3,5,6,7,8,1<br>11,13,15 2,14,16 | 1 P08937                             |
| 2030 | 1,2,4,9,10, 3,5,6,7,8,1<br>11,13,16 2,14,15 | 3 D3ZUC6,P08937,Q9R168               |
| 2031 | 1,2,4,9,10, 3,5,6,7,8,1<br>11,14,15 2,13,16 | 0                                    |
| 2032 | 1,2,4,9,10, 3,5,6,7,8,1<br>11,14,16 2,13,15 | 2 D3ZUC6,Q9R168                      |
| 2033 | 1,2,4,9,10, 3,5,6,7,8,1<br>11,15,16 2,13,14 | 2 D3ZUC6,P08937                      |
| 2034 | 1,2,4,9,10, 3,5,6,7,8,1<br>12,13,14 1,15,16 | 1 Q9QZK9                             |
| 2035 | 1,2,4,9,10, 3,5,6,7,8,1<br>12,13,15 1,14,16 | 1 P08937                             |
| 2036 | 1,2,4,9,10, 3,5,6,7,8,1<br>12,13,16 1,14,15 | 2 D3ZUC6,P08937                      |
| 2037 | 1,2,4,9,10, 3,5,6,7,8,1<br>12,14,15 1,13,16 | 3 P30120,P50115,Q5M8C6               |
| 2038 | 1,2,4,9,10, 3,5,6,7,8,1<br>12,14,16 1,13,15 | 2 D3ZUC6,P01041                      |
| 2039 | 1,2,4,9,10, 3,5,6,7,8,1<br>12,15,16 1,13,14 | 4 D3ZUC6,P08937,P10758,Q99041        |
| 2040 | 1,2,4,9,10, 3,5,6,7,8,1<br>13,14,15 1,12,16 | 3 P47967,Q5M8C6,Q8CFN2               |
| 2041 | 1,2,4,9,10, 3,5,6,7,8,1<br>13,14,16 1,12,15 | 2 D3ZUC6,Q9R168                      |

|      |                                             |                                                                                            |
|------|---------------------------------------------|--------------------------------------------------------------------------------------------|
| 2042 | 1,2,4,9,10, 3,5,6,7,8,1<br>13,15,16 1,12,14 | 3 D3ZUC6,P08937,Q63751                                                                     |
| 2043 | 1,2,4,9,10, 3,5,6,7,8,1<br>14,15,16 1,12,13 | 4 D3ZUC6,P47967,Q5I0D1,Q9QYP1                                                              |
| 2044 | 1,2,4,9,11, 3,5,6,7,8,1<br>12,13,14 0,15,16 | 10 O35077,O70594,P53790,P57113,Q05175,Q5RKI1,Q62761;Q62762;Q62763,Q63270,Q6AY41,Q8<br>R431 |
| 2045 | 1,2,4,9,11, 3,5,6,7,8,1<br>12,13,15 0,14,16 | 6 O35077,P08937,P25031,P57113,Q62761;Q62762;Q62763,Q923S2                                  |
| 2046 | 1,2,4,9,11, 3,5,6,7,8,1<br>12,13,16 0,14,15 | 6 D3ZUC6,P08937,P54921,Q05175,Q5RKI1,Q62714                                                |
| 2047 | 1,2,4,9,11, 3,5,6,7,8,1<br>12,14,15 0,13,16 | 6 O35077,O70257,O70594,P25031,P57113,Q62761;Q62762;Q62763                                  |
| 2048 | 1,2,4,9,11, 3,5,6,7,8,1<br>12,14,16 0,13,15 | 4 D3ZUC6,O70594,Q5RKI1,Q62714                                                              |
| 2049 | 1,2,4,9,11, 3,5,6,7,8,1<br>12,15,16 0,13,14 | 4 D3ZUC6,P08937,Q5QE79,Q62714                                                              |
| 2050 | 1,2,4,9,11, 3,5,6,7,8,1<br>13,14,15 0,12,16 | 3 P0DMW0;P0DMW1,P25031,P57113                                                              |
| 2051 | 1,2,4,9,11, 3,5,6,7,8,1<br>13,14,16 0,12,15 | 6 D3ZUC6,O54728,P0DMW0;P0DMW1,P12368,Q5RKI1,Q9R168                                         |
| 2052 | 1,2,4,9,11, 3,5,6,7,8,1<br>13,15,16 0,12,14 | 4 D3ZUC6,O70417,P08937,Q5RLM2                                                              |
| 2053 | 1,2,4,9,11, 3,5,6,7,8,1<br>14,15,16 0,12,13 | 5 D3ZUC6,P08937,P25031,P47967,Q9R168                                                       |
| 2054 | 1,2,4,9,12, 3,5,6,7,8,1<br>13,14,15 0,11,16 | 0                                                                                          |
| 2055 | 1,2,4,9,12, 3,5,6,7,8,1<br>13,14,16 0,11,15 | 1 Q5RKI1                                                                                   |
| 2056 | 1,2,4,9,12, 3,5,6,7,8,1<br>13,15,16 0,11,14 | 3 D3ZUC6,P08937,Q63751                                                                     |
| 2057 | 1,2,4,9,12, 3,5,6,7,8,1<br>14,15,16 0,11,13 | 2 P08937,P47967                                                                            |
| 2058 | 1,2,4,9,13, 3,5,6,7,8,1<br>14,15,16 0,11,12 | 4 D3ZUC6,P08937,P47967,Q5I0D1                                                              |
| 2059 | 1,2,4,10,1 3,5,6,7,8,9<br>1,12,13,14 ,15,16 | 1 P35280                                                                                   |
| 2060 | 1,2,4,10,1 3,5,6,7,8,9<br>1,12,13,15 ,14,16 | 2 P08937,Q5QE79                                                                            |
| 2061 | 1,2,4,10,1 3,5,6,7,8,9<br>1,12,13,16 ,14,15 | 3 P08937,P35280,Q5QE79                                                                     |

|      |                          |                               |                                                                                                                                                            |
|------|--------------------------|-------------------------------|------------------------------------------------------------------------------------------------------------------------------------------------------------|
| 2062 | 1,2,4,10,1<br>1,12,14,15 | 3,5,6,7,8,9<br>,13,16         | 0                                                                                                                                                          |
| 2063 | 1,2,4,10,1<br>1,12,14,16 | 3,5,6,7,8,9<br>,13,15         | 1 P35280                                                                                                                                                   |
| 2064 | 1,2,4,10,1<br>1,12,15,16 | 3,5,6,7,8,9<br>,13,14         | 3 P08937,P10758,Q5QE79                                                                                                                                     |
| 2065 | 1,2,4,10,1<br>1,13,14,15 | 3,5,6,7,8,9<br>,12,16         | 0                                                                                                                                                          |
| 2066 | 1,2,4,10,1<br>1,13,14,16 | 3,5,6,7,8,9<br>,12,15         | 2 O54728,P35280                                                                                                                                            |
| 2067 | 1,2,4,10,1<br>1,13,15,16 | 3,5,6,7,8,9<br>,12,14         | 4 O70417,P08937,Q5QE79,Q63751                                                                                                                              |
| 2068 | 1,2,4,10,1<br>1,14,15,16 | 3,5,6,7,8,9<br>,12,13         | 1 Q9QYP1                                                                                                                                                   |
| 2069 | 1,2,4,10,1<br>2,13,14,15 | 3,5,6,7,8,9<br>,11,16         | 1 P35280                                                                                                                                                   |
| 2070 | 1,2,4,10,1<br>2,13,14,16 | 3,5,6,7,8,9<br>,11,15         | 3 P06866,P35280,Q6P6R2                                                                                                                                     |
| 2071 | 1,2,4,10,1<br>2,13,15,16 | 3,5,6,7,8,9<br>,11,14         | 6 P06760,P08937,P10758,P35280,Q5QE79,Q63751                                                                                                                |
| 2072 | 1,2,4,10,1<br>2,14,15,16 | 3,5,6,7,8,9<br>,11,13         | 3 P08937,P35280,Q9QYP1                                                                                                                                     |
| 2073 | 1,2,4,10,1<br>3,14,15,16 | 3,5,6,7,8,9<br>,11,12         | 4 P08937,P09527,P35280,Q9QYP1                                                                                                                              |
| 2074 | 1,2,4,11,1<br>2,13,14,15 | 3,5,6,7,8,9<br>,10,16         | 1 P25031                                                                                                                                                   |
| 2075 | 1,2,4,11,1<br>2,13,14,16 | 3,5,6,7,8,9<br>,10,15         | 3 O54728,P35280,Q5RKI1                                                                                                                                     |
| 2076 | 1,2,4,11,1<br>2,13,15,16 | 3,5,6,7,8,9<br>,10,14         | 4 O70417,P08937,Q5QE79,Q63751                                                                                                                              |
| 2077 | 1,2,4,11,1<br>2,14,15,16 | 3,5,6,7,8,9<br>,10,13         | 2 P08937,P25031                                                                                                                                            |
| 2078 | 1,2,4,11,1<br>3,14,15,16 | 3,5,6,7,8,9<br>,10,12         | 3 O54728,P08937,P25031                                                                                                                                     |
| 2079 | 1,2,4,12,1<br>3,14,15,16 | 3,5,6,7,8,9<br>,10,11         | 3 P08937,P35280,Q6P6R2                                                                                                                                     |
| 2080 | 1,2,5,6,7,8<br>,9,10     | 3,4,11,12,<br>13,14,15,1<br>6 | D3ZTX0,iRT-<br>19 Kit_WR_fusion,O70594,P00762,P02454,P02631,P06760,P19629,P23928,P25031,P29315,P31044,<br>P36860,P50115,P50116,P55091,P70545,Q63618,Q91ZS3 |

|      |                       |                               |                                                                                                                                                                                                                                                                                                                                            |
|------|-----------------------|-------------------------------|--------------------------------------------------------------------------------------------------------------------------------------------------------------------------------------------------------------------------------------------------------------------------------------------------------------------------------------------|
| 2081 | 1,2,5,6,7,8<br>,9,11  | 3,4,10,12,<br>13,14,15,1<br>6 | iRT-<br>21 Kit_WR_fusion,P06760,P06911,P07150,P09456,P29315,P31044,P31430,P50115,P50116,P50280,<br>P55091,Q09326,Q5GRG2,Q63493,Q6P6S4,Q78P75,Q812E4,Q9JHB9,Q9JI85,Q9QX74                                                                                                                                                                   |
| 2082 | 1,2,5,6,7,8<br>,9,12  | 3,4,10,11,<br>13,14,15,1<br>6 | iRT-<br>11 Kit_WR_fusion,P06760,P19814,P29315,P36860,P50115,P50116,P55091,Q03191,Q8CJD3,Q91ZS<br>3                                                                                                                                                                                                                                         |
| 2083 | 1,2,5,6,7,8<br>,9,13  | 3,4,10,11,<br>12,14,15,1<br>6 | 10 iRT-Kit_WR_fusion,P02631,P06760,P29315,P36860,P50115,P50116,P52590,P55091,Q78P75                                                                                                                                                                                                                                                        |
| 2084 | 1,2,5,6,7,8<br>,9,14  | 3,4,10,11,<br>12,13,15,1<br>6 | 8 iRT-Kit_WR_fusion,P00762,P06760,P29315,P50115,P50116,P52590,Q62714                                                                                                                                                                                                                                                                       |
| 2085 | 1,2,5,6,7,8<br>,9,15  | 3,4,10,11,<br>12,13,14,1<br>6 | iRT-<br>11 Kit_WR_fusion,P00762,P15999,P19132,P19629,P35745,P36860,P50115,P50116,Q62714,Q9Z0V6                                                                                                                                                                                                                                             |
| 2086 | 1,2,5,6,7,8<br>,9,16  | 3,4,10,11,<br>12,13,14,1<br>5 | 5 iRT-Kit_WR_fusion,P19629,P50115,P50116,P52590                                                                                                                                                                                                                                                                                            |
| 2087 | 1,2,5,6,7,8<br>,10,11 | 3,4,9,12,1<br>3,14,15,16      | iRT-<br>26 Kit_WR_fusion,P02631,P06760,P06761,P06911,P09456,P19629,P22283,P25031,P29315,P31044,<br>P31430,P35952,P36860,P50115,P50116,P50280,P55091,Q5GRG2,Q63493,Q66H69,Q68G31,Q91<br>ZS3,Q9JHB9,Q9JI85,Q9QX74                                                                                                                            |
| 2088 | 1,2,5,6,7,8<br>,10,12 | 3,4,9,11,1<br>3,14,15,16      | iRT-<br>20 Kit_WR_fusion,P02631,P19629,P19814,P25031,P29315,P30904,P31044,P36860,P48508,P50115,<br>P50116,P55091,P57113,Q5RLM2,Q63618,Q66H69,Q66HG3,Q91ZS3,Q99MA2                                                                                                                                                                          |
| 2089 | 1,2,5,6,7,8<br>,10,13 | 3,4,9,11,1<br>2,14,15,16      | A2RUW1,O70594,P02631,P19629,P19814,P23928,P25031,P25809,P29315,P31044,P35952,P368<br>25 60,P46844,P48508,P50115,P50116,P55091,P57113,Q3ZAV1,Q62714,Q63618,Q66H69,Q68G31,<br>Q91ZS3,Q9WUW8                                                                                                                                                  |
| 2090 | 1,2,5,6,7,8<br>,10,14 | 3,4,9,11,1<br>2,13,15,16      | O70594,P00762,P02631,P19629,P23928,P25031,P29315,P31044,P48508,P50115,P50116,P5259<br>22 0,P54921,P55091,P57113,Q5RLM2,Q62714,Q68G31,Q91ZS3,Q923S2,Q9WUW8,Q9Z1F2                                                                                                                                                                           |
| 2091 | 1,2,5,6,7,8<br>,10,15 | 3,4,9,11,1<br>2,13,14,16      | A2RUW1,iRT-<br>Kit_WR_fusion,O08557,O70594,O88339,Q4V882,P00762,P02631,P08721,P19132,P19468,P1962<br>42 9,P19814,P23928,P25031,P30904,P31044,P36860,P38918,P48508,P50115,P50116,P51907,P537<br>90,P54921,P55091,P57113,Q03248,Q05175,Q3ZAV1,Q5I0E9,Q62714,Q63270,Q63474,Q63598,<br>Q63618,Q68G31,Q6MG61,Q6PCU2,Q6Q0N1,Q99MA2,Q9Z0V6,Q9Z1F2 |
| 2092 | 1,2,5,6,7,8<br>,10,16 | 3,4,9,11,1<br>2,13,14,15      | iRT-<br>Kit_WR_fusion,O70594,P02631,P18757,P19468,P19629,P23928,P25031,P31044,P38918,P46844,<br>43 P48508,P50115,P50116,P51907,P52590,P53790,P55091,P57113,Q03248,Q05175,Q3ZAV1,Q5I0<br>E9,Q5M7T9,Q5RLM2,Q62714,Q63270,Q63424,Q63618,Q64602,Q66H69,Q68FT5,Q6AY41,Q6M<br>G61,Q6Q0N1,Q71MB6,Q8R431,Q923S2,Q99MA2,Q9JJ40,Q9WTW7,Q9WUW8,Q9Z0W7 |

2093 1,2,5,6,7,8 3,4,9,10,1  
,11,12 3,14,15,16

2094 1,2,5,6,7,8 3,4,9,10,1  
,11,13 2,14,15,16

2095 1,2,5,6,7,8 3,4,9,10,1  
,11,14 2,13,15,16

2096 1,2,5,6,7,8 3,4,9,10,1  
,11,15 2,13,14,16

2097 1,2,5,6,7,8 3,4,9,10,1  
,11,16 2,13,14,15

2098 1,2,5,6,7,8 3,4,9,10,1  
,12,13 1,14,15,16

2099 1,2,5,6,7,8 3,4,9,10,1  
,12,14 1,13,15,16

2100 1,2,5,6,7,8 3,4,9,10,1  
,12,15 1,13,14,16

2101 1,2,5,6,7,8 3,4,9,10,1  
,12,16 1,13,14,15

2102 1,2,5,6,7,8 3,4,9,10,1  
,13,14 1,12,15,16

2103 1,2,5,6,7,8 3,4,9,10,1  
,13,15 1,12,14,16

2104 1,2,5,6,7,8 3,4,9,10,1  
,13,16 1,12,14,15

2105 1,2,5,6,7,8 3,4,9,10,1  
,14,15 1,12,13,16

iRT-  
26 Kit\_WR\_fusion,P06760,P06761,P06911,P08723,P09456,P12020,P19629,P22283,P29315,P31044,  
P31430,P46462,P50115,P50116,P50280,P55091,Q00715,Q09326,Q5GRG2,Q63493,Q66H69,Q6I  
G05,Q78P75,Q9JHB9,Q9JI85

iRT-  
26 Kit\_WR\_fusion,P02782,P06760,P06761,P06911,P08723,P09456,P12020,P22283,P29315,P31044,  
P31430,P36860,P46462,P50115,P50116,P50280,P55091,Q09326,Q5GRG2,Q63493,Q66H69,Q68  
G31,Q78P75,Q9JHB9,Q9JI85

iRT-  
21 Kit\_WR\_fusion,P06760,P06761,P06911,P09456,P12020,P19218,P22283,P29315,P31044,P31430,  
P46462,P50115,P50116,P50280,P52590,Q09326,Q5GRG2,Q63493,Q9JHB9,Q9JI85

iRT-  
27 Kit\_WR\_fusion,P02793;Q7TP54,P06760,P06911,P08721,P09456,P19132,P19629,P22283,P31044,  
P31430,P50115,P50116,P50280,Q09326,Q4FZU2,Q5GRG2,Q63493,Q66H69,Q6IFU8,Q6IG05,Q6I  
MF3,Q6P6Q2,Q8CJ52,Q9JHB9,Q9JI85,Q9QX74

iRT-  
35 Kit\_WR\_fusion,O35547,P02780,P02781,P02782,P04905,P06760,P06761,P06911,P07647,P08010,  
P08723,P09456,P0C0A9,P12020,P19629,P22283,P30120,P31044,P46462,P50115,P50116,P5028  
0,P52590,Q00715,Q5GRG2,Q5M8C6,Q63493,Q66H69,Q6IG05,Q812E4,Q9JHB9,Q9JI85,Q9QW0  
7,Q9Z0J6

iRT-  
12 Kit\_WR\_fusion,P01835,P02631,P06911,P19814,P29315,P31044,P36860,P50115,P50116,Q66H69,  
Q9JI85

10 iRT-Kit\_WR\_fusion,P06911,P19814,P29315,P31044,P50115,P50116,P52590,Q5GRG2,Q5RLM2

10 iRT-Kit\_WR\_fusion,P19132,P19629,P19814,P31044,P36860,P50115,P50116,Q66H69,Q6IG05

9 iRT-Kit\_WR\_fusion,P19629,P19814,P31044,P50115,P50116,P52590,Q66H69,Q9JHB9

11 P01835,P25809,P29315,P31044,P50115,P50116,P52590,Q62714,Q66H69,Q68G31,Q9WUW8

iRT-  
14 Kit\_WR\_fusion,O70594,P01835,P19132,P19629,P19814,P31044,P36860,P50115,P50116,Q62714,  
Q66H69,Q68G31,Q6PCU2

iRT-  
13 Kit\_WR\_fusion,P01835,P02631,P19629,P31044,P46844,P50115,P50116,P52590,Q62714,Q66H69  
,Q9JI85,Q9WUW8

iRT-  
11 Kit\_WR\_fusion,P19132,P19629,P19814,P31044,P50115,P50116,P52590,P54921,Q62714,Q6PCU2



2106 1,2,5,6,7,8 3,4,9,10,1  
,14,16 1,12,13,15

2107 1,2,5,6,7,8 3,4,9,10,1  
,15,16 1,12,13,14

2108 1,2,5,6,7,9 3,4,8,12,1  
,10,11 3,14,15,16

2109 1,2,5,6,7,9 3,4,8,11,1  
,10,12 3,14,15,16

2110 1,2,5,6,7,9 3,4,8,11,1  
,10,13 2,14,15,16

2111 1,2,5,6,7,9 3,4,8,11,1  
,10,14 2,13,15,16

2112 1,2,5,6,7,9 3,4,8,11,1  
,10,15 2,13,14,16

2113 1,2,5,6,7,9 3,4,8,11,1  
,10,16 2,13,14,15

2114 1,2,5,6,7,9 3,4,8,10,1  
,11,12 3,14,15,16

2115 1,2,5,6,7,9 3,4,8,10,1  
,11,13 2,14,15,16

2116 1,2,5,6,7,9 3,4,8,10,1  
,11,14 2,13,15,16

2117 1,2,5,6,7,9 3,4,8,10,1  
,11,15 2,13,14,16

2118 1,2,5,6,7,9 3,4,8,10,1  
,11,16 2,13,14,15

2119 1,2,5,6,7,9 3,4,8,10,1  
,12,13 1,14,15,16

2120 1,2,5,6,7,9 3,4,8,10,1  
,12,14 1,13,15,16

2121 1,2,5,6,7,9 3,4,8,10,1  
,12,15 1,13,14,16

2122 1,2,5,6,7,9 3,4,8,10,1  
,12,16 1,13,14,15

2123 1,2,5,6,7,9 3,4,8,10,1  
,13,14 1,12,15,16

2124 1,2,5,6,7,9 3,4,8,10,1  
,13,15 1,12,14,16

iRT-

11 Kit\_WR\_fusion,P19629,P31044,P50115,P50116,P50280,P52590,P57113,Q5RLM2,Q62714,Q9WUW8  
B2RYW9,iRT-

15 Kit\_WR\_fusion,O70594,P17988,P19132,P19629,P48508,P50115,P50116,P50280,P52590,P57113,Q62714,Q63270,Q6IG05

3 P00762,P36860,P50116

9 D3ZTX0,O54728,P00762,P19814,P29315,P36860,P50116,Q03191,Q6AY61

5 D3ZTX0,P00762,P01835,P29315,P36860

4 P00762,P29315,P50116,P52590

6 D3ZTX0,O54728,P00762,P36860,Q811M5,Q99MH3

3 D3ZTX0,P00762,Q9R168

4 O35077,P00762,P50116,Q03191

3 P00762,Q9EQS0,Q9R168

6 P00762,P0DMW0,P0DMW1,P50116,P52590,Q5I0J9,Q9R168

3 P00762,P02625,Q8CJ52

5 P52590,Q9EQS0,Q9JHB9,Q9R168,Q9Z0J6

7 P00762,P01835,P19814,P29315,P36860,Q03191,Q6AY61

5 P00762,P29315,P52590,Q03191,Q6AY61

6 O54728,P00762,P19814,P36860,Q03191,Q6AY61

1 Q03191

7 P00762,P01835,P0DMW0,P0DMW1,P29315,P52590,Q9EQS0,Q9R168

5 O70417,P00762,P01835,P02625,P36860

|      |                        |                          |    |                                                                                                   |
|------|------------------------|--------------------------|----|---------------------------------------------------------------------------------------------------|
| 2125 | 1,2,5,6,7,9<br>,13,16  | 3,4,8,10,1<br>1,12,14,15 | 4  | P01835,P52590,Q9EQS0,Q9R168                                                                       |
| 2126 | 1,2,5,6,7,9<br>,14,15  | 3,4,8,10,1<br>1,12,13,16 | 4  | P00762,P01835,P02625,P52590                                                                       |
| 2127 | 1,2,5,6,7,9<br>,14,16  | 3,4,8,10,1<br>1,12,13,15 | 2  | P52590,Q9R168                                                                                     |
| 2128 | 1,2,5,6,7,9<br>,15,16  | 3,4,8,10,1<br>1,12,13,14 | 0  |                                                                                                   |
| 2129 | 1,2,5,6,7,1<br>0,11,12 | 3,4,8,9,13,<br>14,15,16  | 5  | P00762,P23593,P29315,P36860,P50116                                                                |
| 2130 | 1,2,5,6,7,1<br>0,11,13 | 3,4,8,9,12,<br>14,15,16  | 5  | P00762,P01835,P29315,P36860,Q68G31                                                                |
| 2131 | 1,2,5,6,7,1<br>0,11,14 | 3,4,8,9,12,<br>13,15,16  | 4  | P00762,P29315,P50116,P52590                                                                       |
| 2132 | 1,2,5,6,7,1<br>0,11,15 | 3,4,8,9,12,<br>13,14,16  | 4  | P00762,P08721,P17988,P36860                                                                       |
| 2133 | 1,2,5,6,7,1<br>0,11,16 | 3,4,8,9,12,<br>13,14,15  | 1  | Q9JHB9                                                                                            |
| 2134 | 1,2,5,6,7,1<br>0,12,13 | 3,4,8,9,11,<br>14,15,16  | 6  | P00762,P01835,P19814,P29315,P36860,Q6AY61                                                         |
| 2135 | 1,2,5,6,7,1<br>0,12,14 | 3,4,8,9,11,<br>13,15,16  | 7  | P00762,P01835,P19814,P29315,P52590,Q5RLM2,Q6AY61                                                  |
| 2136 | 1,2,5,6,7,1<br>0,12,15 | 3,4,8,9,11,<br>13,14,16  | 6  | O54728,P00762,P01835,P19814,P36860,Q6AY61                                                         |
| 2137 | 1,2,5,6,7,1<br>0,12,16 | 3,4,8,9,11,<br>13,14,15  | 3  | P01835,P57113,Q6AY61                                                                              |
| 2138 | 1,2,5,6,7,1<br>0,13,14 | 3,4,8,9,11,<br>12,15,16  | 8  | A2RUW1,O88797,P00762,P01835,P29315,P52590,Q62714,Q9WUW8                                           |
| 2139 | 1,2,5,6,7,1<br>0,13,15 | 3,4,8,9,11,<br>12,14,16  | 9  | A2RUW1,O70417,O88797,P00762,P01835,P19814,P36860,Q62714,Q63618                                    |
| 2140 | 1,2,5,6,7,1<br>0,13,16 | 3,4,8,9,11,<br>12,14,15  | 4  | P01835,P36860,P57113,Q9EQS0                                                                       |
| 2141 | 1,2,5,6,7,1<br>0,14,15 | 3,4,8,9,11,<br>12,13,16  | 6  | A2RUW1,P00762,P01835,P52590,P54921,Q62714                                                         |
| 2142 | 1,2,5,6,7,1<br>0,14,16 | 3,4,8,9,11,<br>12,13,15  | 5  | P01835,P09527,P52590,P57113,Q9WUW8                                                                |
| 2143 | 1,2,5,6,7,1<br>0,15,16 | 3,4,8,9,11,<br>12,13,14  | 14 | B2RYW9,O70594,P01835,P08721,P09527,P17988,P19468,P23928,P48508,P57113,Q03248,Q5I0E9,Q64335,Q71MB6 |
| 2144 | 1,2,5,6,7,1<br>1,12,13 | 3,4,8,9,10,<br>14,15,16  | 4  | P01835,P29315,P47967,Q5I0D1                                                                       |

|      |                        |                          |   |                                                                |
|------|------------------------|--------------------------|---|----------------------------------------------------------------|
| 2145 | 1,2,5,6,7,1<br>1,12,14 | 3,4,8,9,10,<br>13,15,16  | 4 | P00762,P29315,P52590,Q5GRG2                                    |
| 2146 | 1,2,5,6,7,1<br>1,12,15 | 3,4,8,9,10,<br>13,14,16  | 1 | P00762                                                         |
| 2147 | 1,2,5,6,7,1<br>1,12,16 | 3,4,8,9,10,<br>13,14,15  | 4 | O35547,P07647,Q00715,Q9JHB9                                    |
| 2148 | 1,2,5,6,7,1<br>1,13,14 | 3,4,8,9,10,<br>12,15,16  | 4 | P00762,P01835,P29315,P52590                                    |
| 2149 | 1,2,5,6,7,1<br>1,13,15 | 3,4,8,9,10,<br>12,14,16  | 4 | O70417,P00762,P01835,P36860                                    |
| 2150 | 1,2,5,6,7,1<br>1,13,16 | 3,4,8,9,10,<br>12,14,15  | 9 | O70417,P01835,P07647,P09456,P22283,P52590,Q9EQS0,Q9JHB9,Q9Z0J6 |
| 2151 | 1,2,5,6,7,1<br>1,14,15 | 3,4,8,9,10,<br>12,13,16  | 4 | P00762,P01835,P52590,Q8CJ52                                    |
| 2152 | 1,2,5,6,7,1<br>1,14,16 | 3,4,8,9,10,<br>12,13,15  | 4 | P01039,P01835,P52590,Q9JHB9                                    |
| 2153 | 1,2,5,6,7,1<br>1,15,16 | 3,4,8,9,10,<br>12,13,14  | 6 | B2RYW9,O70417,P08721,P17988,Q8CJ52,Q9JHB9                      |
| 2154 | 1,2,5,6,7,1<br>2,13,14 | 3,4,8,9,10,<br>11,15,16  | 6 | P00762,P01835,P19814,P29315,P52590,Q6AY61                      |
| 2155 | 1,2,5,6,7,1<br>2,13,15 | 3,4,8,9,10,<br>11,14,16  | 6 | O70417,P00762,P01835,P19814,P36860,Q6AY61                      |
| 2156 | 1,2,5,6,7,1<br>2,13,16 | 3,4,8,9,10,<br>11,14,15  | 2 | P01835,Q6AY61                                                  |
| 2157 | 1,2,5,6,7,1<br>2,14,15 | 3,4,8,9,10,<br>11,13,16  | 5 | P00762,P01835,P19814,P52590,Q6AY61                             |
| 2158 | 1,2,5,6,7,1<br>2,14,16 | 3,4,8,9,10,<br>11,13,15  | 3 | P01835,P52590,Q6AY61                                           |
| 2159 | 1,2,5,6,7,1<br>2,15,16 | 3,4,8,9,10,<br>11,13,14  | 4 | P01835,P17988,P19814,Q6AY61                                    |
| 2160 | 1,2,5,6,7,1<br>3,14,15 | 3,4,8,9,10,<br>11,12,16  | 6 | A2RUW1,O88797,P00762,P01835,P52590,Q62714                      |
| 2161 | 1,2,5,6,7,1<br>3,14,16 | 3,4,8,9,10,<br>11,12,15  | 5 | P01835,P52590,Q62714,Q9EQS0,Q9WUW8                             |
| 2162 | 1,2,5,6,7,1<br>3,15,16 | 3,4,8,9,10,<br>11,12,14  | 5 | B2RYW9,O70417,P01835,Q62714,Q9EQS0                             |
| 2163 | 1,2,5,6,7,1<br>4,15,16 | 3,4,8,9,10,<br>11,12,13  | 4 | P01835,P17988,P52590,Q62714                                    |
| 2164 | 1,2,5,6,8,9<br>,10,11  | 3,4,7,12,1<br>3,14,15,16 | 5 | P25031,Q5I0J9,Q68G31,Q6P6S4,Q99MH3                             |

|      |                       |                          |   |                                                         |
|------|-----------------------|--------------------------|---|---------------------------------------------------------|
| 2165 | 1,2,5,6,8,9<br>,10,12 | 3,4,7,11,1<br>3,14,15,16 | 8 | P00762,P02454,P19814,P25031,P29315,P36860,Q03191,Q99MH3 |
| 2166 | 1,2,5,6,8,9<br>,10,13 | 3,4,7,11,1<br>2,14,15,16 | 5 | D3ZTX0,P25031,P29315,P36860,Q68G31                      |
| 2167 | 1,2,5,6,8,9<br>,10,14 | 3,4,7,11,1<br>2,13,15,16 | 7 | P00762,P25031,P29315,P52590,P97840,Q5I0J9,Q68G31        |
| 2168 | 1,2,5,6,8,9<br>,10,15 | 3,4,7,11,1<br>2,13,14,16 | 7 | P00762,P19132,P25031,P36860,Q68G31,Q811M5,Q99MH3        |
| 2169 | 1,2,5,6,8,9<br>,10,16 | 3,4,7,11,1<br>2,13,14,15 | 2 | P25031,P70545                                           |
| 2170 | 1,2,5,6,8,9<br>,11,12 | 3,4,7,10,1<br>3,14,15,16 | 7 | P61206,P84079,Q03191,Q5GRG2,Q5I0J9,Q5RKI1,Q6IG05,Q99MH3 |
| 2171 | 1,2,5,6,8,9<br>,11,13 | 3,4,7,10,1<br>2,14,15,16 | 4 | Q09326,Q5RKI1,Q68G31,Q9JI85                             |
| 2172 | 1,2,5,6,8,9<br>,11,14 | 3,4,7,10,1<br>2,13,15,16 | 4 | P52590,Q5GRG2,Q5I0J9,Q5RKI1                             |
| 2173 | 1,2,5,6,8,9<br>,11,15 | 3,4,7,10,1<br>2,13,14,16 | 5 | P19132,Q6IG05,Q6IMF3,Q6P6S4,Q99MH3                      |
| 2174 | 1,2,5,6,8,9<br>,11,16 | 3,4,7,10,1<br>2,13,14,15 | 5 | P09456,Q5I0J9,Q5RKI1,Q812E4,Q9JHB9                      |
| 2175 | 1,2,5,6,8,9<br>,12,13 | 3,4,7,10,1<br>1,14,15,16 | 3 | P29315,Q5RKI1,Q8CJD3                                    |
| 2176 | 1,2,5,6,8,9<br>,12,14 | 3,4,7,10,1<br>1,13,15,16 | 5 | P29315,P52590,Q5I0J9,Q5RKI1,Q8CJD3                      |
| 2177 | 1,2,5,6,8,9<br>,12,15 | 3,4,7,10,1<br>1,13,14,16 | 6 | P19132,P19814,P36376,Q6IG05,Q8CJD3,Q99MH3               |
| 2178 | 1,2,5,6,8,9<br>,12,16 | 3,4,7,10,1<br>1,13,14,15 | 2 | Q5RKI1,Q8CJD3                                           |
| 2179 | 1,2,5,6,8,9<br>,13,14 | 3,4,7,10,1<br>1,12,15,16 | 4 | P29315,P52590,Q5RKI1,Q68G31                             |
| 2180 | 1,2,5,6,8,9<br>,13,15 | 3,4,7,10,1<br>1,12,14,16 | 2 | P19132,Q68G31                                           |
| 2181 | 1,2,5,6,8,9<br>,13,16 | 3,4,7,10,1<br>1,12,14,15 | 2 | P52590,Q5RKI1                                           |
| 2182 | 1,2,5,6,8,9<br>,14,15 | 3,4,7,10,1<br>1,12,13,16 | 4 | P00714,P19132,P52590,P97840                             |
| 2183 | 1,2,5,6,8,9<br>,14,16 | 3,4,7,10,1<br>1,12,13,15 | 4 | P52590,P97840,Q5I0J9,Q5RKI1                             |
| 2184 | 1,2,5,6,8,9<br>,15,16 | 3,4,7,10,1<br>1,12,13,14 | 1 | P19132                                                  |

|      |                        |                         |    |                                                                       |
|------|------------------------|-------------------------|----|-----------------------------------------------------------------------|
| 2185 | 1,2,5,6,8,1<br>0,11,12 | 3,4,7,9,13,<br>14,15,16 | 5  | P25031,P29315,Q5GRG2,Q68G31,Q6IG05                                    |
| 2186 | 1,2,5,6,8,1<br>0,11,13 | 3,4,7,9,12,<br>14,15,16 | 3  | P25031,Q68G31,Q9JI85                                                  |
| 2187 | 1,2,5,6,8,1<br>0,11,14 | 3,4,7,9,12,<br>13,15,16 | 4  | P52590,P63029,Q5GRG2,Q68G31                                           |
| 2188 | 1,2,5,6,8,1<br>0,11,15 | 3,4,7,9,12,<br>13,14,16 | 3  | Q68G31,Q6IG05,Q6IMF3                                                  |
| 2189 | 1,2,5,6,8,1<br>0,11,16 | 3,4,7,9,12,<br>13,14,15 | 4  | P15399,P25031,Q68G31,Q9JHB9                                           |
| 2190 | 1,2,5,6,8,1<br>0,12,13 | 3,4,7,9,11,<br>14,15,16 | 6  | P02631,P19814,P25031,P29315,P36860,Q68G31                             |
| 2191 | 1,2,5,6,8,1<br>0,12,14 | 3,4,7,9,11,<br>13,15,16 | 6  | P19814,P25031,P29315,P52590,Q5RLM2,Q68G31                             |
| 2192 | 1,2,5,6,8,1<br>0,12,15 | 3,4,7,9,11,<br>13,14,16 | 8  | P19132,P19629,P19814,P25031,P36860,Q498D9,Q68G31,Q6IG05               |
| 2193 | 1,2,5,6,8,1<br>0,12,16 | 3,4,7,9,11,<br>13,14,15 | 1  | P25031                                                                |
| 2194 | 1,2,5,6,8,1<br>0,13,14 | 3,4,7,9,11,<br>12,15,16 | 5  | P25031,P29315,P52590,Q62714,Q68G31                                    |
| 2195 | 1,2,5,6,8,1<br>0,13,15 | 3,4,7,9,11,<br>12,14,16 | 7  | P19132,P25031,P36860,Q498D9,Q62714,Q63618,Q68G31                      |
| 2196 | 1,2,5,6,8,1<br>0,13,16 | 3,4,7,9,11,<br>12,14,15 | 3  | P15399,P25031,Q68G31                                                  |
| 2197 | 1,2,5,6,8,1<br>0,14,15 | 3,4,7,9,11,<br>12,13,16 | 7  | P00714,P19132,P25031,P52590,P54921,Q62714,Q68G31                      |
| 2198 | 1,2,5,6,8,1<br>0,14,16 | 3,4,7,9,11,<br>12,13,15 | 6  | P14668,P15399,P25031,P52590,P97580,Q68G31                             |
| 2199 | 1,2,5,6,8,1<br>0,15,16 | 3,4,7,9,11,<br>12,13,14 | 4  | P15399,P19629,P25031,Q68G31                                           |
| 2200 | 1,2,5,6,8,1<br>1,12,13 | 3,4,7,9,10,<br>14,15,16 | 7  | P12020,Q09326,Q5GRG2,Q5RKI1,Q68G31,Q6IG05,Q9JI85                      |
| 2201 | 1,2,5,6,8,1<br>1,12,14 | 3,4,7,9,10,<br>13,15,16 | 7  | P12020,P19218,P52590,Q5GRG2,Q5I0J9,Q5RKI1,Q6IG05                      |
| 2202 | 1,2,5,6,8,1<br>1,12,15 | 3,4,7,9,10,<br>13,14,16 | 3  | Q5GRG2,Q6IG05,Q6IMF3                                                  |
| 2203 | 1,2,5,6,8,1<br>1,12,16 | 3,4,7,9,10,<br>13,14,15 | 10 | O35547,P02782,P12020,P30120,Q00715,Q5GRG2,Q5RKI1,Q6IG05,Q9JHB9,Q9JI85 |
| 2204 | 1,2,5,6,8,1<br>1,13,14 | 3,4,7,9,10,<br>12,15,16 | 6  | P52590,Q09326,Q5GRG2,Q5RKI1,Q68G31,Q9JI85                             |

|      |                        |                         |   |                                                                |
|------|------------------------|-------------------------|---|----------------------------------------------------------------|
| 2205 | 1,2,5,6,8,1<br>1,13,15 | 3,4,7,9,10,<br>12,14,16 | 4 | Q68G31,Q6IG05,Q6IMF3,Q6P6Q2                                    |
| 2206 | 1,2,5,6,8,1<br>1,13,16 | 3,4,7,9,10,<br>12,14,15 | 9 | P02782,P09456,P30120,P52590,Q5GRG2,Q5RKI1,Q68G31,Q9JHB9,Q9JI85 |
| 2207 | 1,2,5,6,8,1<br>1,14,15 | 3,4,7,9,10,<br>12,13,16 | 8 | P50280,P52590,Q5GRG2,Q68G31,Q6IFU8,Q6IG05,Q6IMF3,Q6P6Q2        |
| 2208 | 1,2,5,6,8,1<br>1,14,16 | 3,4,7,9,10,<br>12,13,15 | 6 | P09456,P50280,P52590,Q5GRG2,Q5RKI1,Q9JHB9                      |
| 2209 | 1,2,5,6,8,1<br>1,15,16 | 3,4,7,9,10,<br>12,13,14 | 5 | P50280,Q6IFU8,Q6IG05,Q6IMF3,Q6P6Q2                             |
| 2210 | 1,2,5,6,8,1<br>2,13,14 | 3,4,7,9,10,<br>11,15,16 | 5 | P19814,P29315,P52590,Q5RKI1,Q68G31                             |
| 2211 | 1,2,5,6,8,1<br>2,13,15 | 3,4,7,9,10,<br>11,14,16 | 4 | P19132,P19814,Q68G31,Q6IG05                                    |
| 2212 | 1,2,5,6,8,1<br>2,13,16 | 3,4,7,9,10,<br>11,14,15 | 1 | Q5RKI1                                                         |
| 2213 | 1,2,5,6,8,1<br>2,14,15 | 3,4,7,9,10,<br>11,13,16 | 5 | P00714,P19132,P19814,P52590,Q6IG05                             |
| 2214 | 1,2,5,6,8,1<br>2,14,16 | 3,4,7,9,10,<br>11,13,15 | 2 | P52590,Q5RKI1                                                  |
| 2215 | 1,2,5,6,8,1<br>2,15,16 | 3,4,7,9,10,<br>11,13,14 | 2 | P19132,Q6IG05                                                  |
| 2216 | 1,2,5,6,8,1<br>3,14,15 | 3,4,7,9,10,<br>11,12,16 | 4 | P19132,P52590,Q62714,Q68G31                                    |
| 2217 | 1,2,5,6,8,1<br>3,14,16 | 3,4,7,9,10,<br>11,12,15 | 4 | P52590,Q5RKI1,Q62714,Q68G31                                    |
| 2218 | 1,2,5,6,8,1<br>3,15,16 | 3,4,7,9,10,<br>11,12,14 | 2 | Q62714,Q68G31                                                  |
| 2219 | 1,2,5,6,8,1<br>4,15,16 | 3,4,7,9,10,<br>11,12,13 | 2 | P52590,Q62714                                                  |
| 2220 | 1,2,5,6,9,1<br>0,11,12 | 3,4,7,8,13,<br>14,15,16 | 6 | B0BNN3,P00762,Q03191,Q5I0J9,Q99MH3,Q9Z2L0                      |
| 2221 | 1,2,5,6,9,1<br>0,11,13 | 3,4,7,8,12,<br>14,15,16 | 3 | O70417,P00762,Q68G31                                           |
| 2222 | 1,2,5,6,9,1<br>0,11,14 | 3,4,7,8,12,<br>13,15,16 | 2 | P00762,Q5I0J9                                                  |
| 2223 | 1,2,5,6,9,1<br>0,11,15 | 3,4,7,8,12,<br>13,14,16 | 4 | O70417,P00762,Q99MH3,Q9Z2L0                                    |
| 2224 | 1,2,5,6,9,1<br>0,11,16 | 3,4,7,8,12,<br>13,14,15 | 3 | D3ZUC6,Q5I0J9,Q9Z2L0                                           |

|      |                        |                         |    |                                                                       |
|------|------------------------|-------------------------|----|-----------------------------------------------------------------------|
| 2225 | 1,2,5,6,9,1<br>0,12,13 | 3,4,7,8,11,<br>14,15,16 | 6  | D3ZTX0,P00762,P0C0A9,P29315,P36860,Q03191                             |
| 2226 | 1,2,5,6,9,1<br>0,12,14 | 3,4,7,8,11,<br>13,15,16 | 5  | P00762,P29315,Q03191,Q5I0J9,Q62902                                    |
| 2227 | 1,2,5,6,9,1<br>0,12,15 | 3,4,7,8,11,<br>13,14,16 | 10 | B0BNN3,O54728,P00762,P19814,P30120,Q03191,Q5M8C6,Q811M5,Q99041,Q99MH3 |
| 2228 | 1,2,5,6,9,1<br>0,12,16 | 3,4,7,8,11,<br>13,14,15 | 2  | D3ZUC6,Q03191                                                         |
| 2229 | 1,2,5,6,9,1<br>0,13,14 | 3,4,7,8,11,<br>12,15,16 | 3  | P00762,P29315,P52590                                                  |
| 2230 | 1,2,5,6,9,1<br>0,13,15 | 3,4,7,8,11,<br>12,14,16 | 7  | O70417,P00762,P11883,P36860,Q5M8C6,Q811M5,Q99MH3                      |
| 2231 | 1,2,5,6,9,1<br>0,13,16 | 3,4,7,8,11,<br>12,14,15 | 4  | D3ZUC6,O70417,P11883,Q9EQS0                                           |
| 2232 | 1,2,5,6,9,1<br>0,14,15 | 3,4,7,8,11,<br>12,13,16 | 8  | P00714,P00762,P02780,P22273,P30120,P97840,Q5M8C6,Q811M5               |
| 2233 | 1,2,5,6,9,1<br>0,14,16 | 3,4,7,8,11,<br>12,13,15 | 1  | P52590                                                                |
| 2234 | 1,2,5,6,9,1<br>0,15,16 | 3,4,7,8,11,<br>12,13,14 | 5  | D3ZUC6,O70417,P00762,P11883,Q811M5                                    |
| 2235 | 1,2,5,6,9,1<br>1,12,13 | 3,4,7,8,10,<br>14,15,16 | 6  | O35077,O70417,P00762,Q03191,Q5I0J9,Q5RKI1                             |
| 2236 | 1,2,5,6,9,1<br>1,12,14 | 3,4,7,8,10,<br>13,15,16 | 8  | O35077,P00762,P52590,Q03191,Q5I0J9,Q5RKI1,Q63424,Q64093               |
| 2237 | 1,2,5,6,9,1<br>1,12,15 | 3,4,7,8,10,<br>13,14,16 | 7  | B0BNN3,O35077,O70417,P00762,Q03191,Q5I0J9,Q99MH3                      |
| 2238 | 1,2,5,6,9,1<br>1,12,16 | 3,4,7,8,10,<br>13,14,15 | 4  | O70417,Q03191,Q5I0J9,Q5RKI1                                           |
| 2239 | 1,2,5,6,9,1<br>1,13,14 | 3,4,7,8,10,<br>12,15,16 | 7  | P00762,P0DMW0;P0DMW1,P52590,Q5I0J9,Q5RKI1,Q64093,Q9EQS0               |
| 2240 | 1,2,5,6,9,1<br>1,13,15 | 3,4,7,8,10,<br>12,14,16 | 3  | O70417,P00762,Q99MH3                                                  |
| 2241 | 1,2,5,6,9,1<br>1,13,16 | 3,4,7,8,10,<br>12,14,15 | 4  | D3ZUC6,O70417,Q5RKI1,Q9EQS0                                           |
| 2242 | 1,2,5,6,9,1<br>1,14,15 | 3,4,7,8,10,<br>12,13,16 | 5  | P00762,P02625,P0DMW0;P0DMW1,Q5I0J9,Q923V8                             |
| 2243 | 1,2,5,6,9,1<br>1,14,16 | 3,4,7,8,10,<br>12,13,15 | 3  | P52590,Q5I0J9,Q5RKI1                                                  |
| 2244 | 1,2,5,6,9,1<br>1,15,16 | 3,4,7,8,10,<br>12,13,14 | 1  | O70417                                                                |

|      |                         |                         |   |                                                         |
|------|-------------------------|-------------------------|---|---------------------------------------------------------|
| 2245 | 1,2,5,6,9,1<br>2,13,14  | 3,4,7,8,10,<br>11,15,16 | 6 | P00762,P29315,P52590,Q03191,Q5I0J9,Q5RKI1               |
| 2246 | 1,2,5,6,9,1<br>2,13,15  | 3,4,7,8,10,<br>11,14,16 | 5 | O70417,P00762,P0C0A9,Q99041,Q99MH3                      |
| 2247 | 1,2,5,6,9,1<br>2,13,16  | 3,4,7,8,10,<br>11,14,15 | 4 | O70417,Q03191,Q5RKI1,Q9EQS0                             |
| 2248 | 1,2,5,6,9,1<br>2,14,15  | 3,4,7,8,10,<br>11,13,16 | 4 | P00714,P00762,P30120,Q5I0J9                             |
| 2249 | 1,2,5,6,9,1<br>2,14,16  | 3,4,7,8,10,<br>11,13,15 | 4 | P52590,Q03191,Q5I0J9,Q5RKI1                             |
| 2250 | 1,2,5,6,9,1<br>2,15,16  | 3,4,7,8,10,<br>11,13,14 | 2 | O70417,Q99041                                           |
| 2251 | 1,2,5,6,9,1<br>3,14,15  | 3,4,7,8,10,<br>11,12,16 | 7 | O70417,P00762,P01835,P02625,P0DMW0;P0DMW1,P52590,Q5M8C6 |
| 2252 | 1,2,5,6,9,1<br>3,14,16  | 3,4,7,8,10,<br>11,12,15 | 3 | P52590,Q5RKI1,Q9EQS0                                    |
| 2253 | 1,2,5,6,9,1<br>3,15,16  | 3,4,7,8,10,<br>11,12,14 | 3 | O70417,P11883,Q9EQS0                                    |
| 2254 | 1,2,5,6,9,1<br>4,15,16  | 3,4,7,8,10,<br>11,12,13 | 4 | P47967,P52590,P97840,Q5I0D1                             |
| 2255 | 1,2,5,6,10,<br>11,12,13 | 3,4,7,8,9,1<br>4,15,16  | 5 | O70417,P20646,P23593,P35280,Q68G31                      |
| 2256 | 1,2,5,6,10,<br>11,12,14 | 3,4,7,8,9,1<br>3,15,16  | 2 | P00762,P35280                                           |
| 2257 | 1,2,5,6,10,<br>11,12,15 | 3,4,7,8,9,1<br>3,14,16  | 2 | O70417,P00762                                           |
| 2258 | 1,2,5,6,10,<br>11,12,16 | 3,4,7,8,9,1<br>3,14,15  | 1 | P35280                                                  |
| 2259 | 1,2,5,6,10,<br>11,13,14 | 3,4,7,8,9,1<br>2,15,16  | 3 | P00762,P35280,Q68G31                                    |
| 2260 | 1,2,5,6,10,<br>11,13,15 | 3,4,7,8,9,1<br>2,14,16  | 3 | O70417,P00762,Q68G31                                    |
| 2261 | 1,2,5,6,10,<br>11,13,16 | 3,4,7,8,9,1<br>2,14,15  | 4 | O70417,P35280,Q68G31,Q9EQS0                             |
| 2262 | 1,2,5,6,10,<br>11,14,15 | 3,4,7,8,9,1<br>2,13,16  | 1 | P00762                                                  |
| 2263 | 1,2,5,6,10,<br>11,14,16 | 3,4,7,8,9,1<br>2,13,15  | 2 | P35280,P52590                                           |
| 2264 | 1,2,5,6,10,<br>11,15,16 | 3,4,7,8,9,1<br>2,13,14  | 2 | O70417,P17988                                           |



|      |                                             |                                                    |
|------|---------------------------------------------|----------------------------------------------------|
| 2265 | 1,2,5,6,10, 3,4,7,8,9,1<br>12,13,14 1,15,16 | 6 P00762,P01835,P19814,P20646,P29315,P35280        |
| 2266 | 1,2,5,6,10, 3,4,7,8,9,1<br>12,13,15 1,14,16 | 7 O70417,P00762,P01835,P19814,P35280,P36860,Q812E4 |
| 2267 | 1,2,5,6,10, 3,4,7,8,9,1<br>12,13,16 1,14,15 | 3 O70417,P01835,P35280                             |
| 2268 | 1,2,5,6,10, 3,4,7,8,9,1<br>12,14,15 1,13,16 | 5 P00714,P00762,P19814,P35280,Q62902               |
| 2269 | 1,2,5,6,10, 3,4,7,8,9,1<br>12,14,16 1,13,15 | 3 P14668,P35280,P52590                             |
| 2270 | 1,2,5,6,10, 3,4,7,8,9,1<br>12,15,16 1,13,14 | 2 O70417,P35280                                    |
| 2271 | 1,2,5,6,10, 3,4,7,8,9,1<br>13,14,15 1,12,16 | 5 O70417,P00762,P01835,P35280,Q68G31               |
| 2272 | 1,2,5,6,10, 3,4,7,8,9,1<br>13,14,16 1,12,15 | 4 P01835,P14668,P35280,P52590                      |
| 2273 | 1,2,5,6,10, 3,4,7,8,9,1<br>13,15,16 1,12,14 | 4 O70417,P01835,P11883,P35280                      |
| 2274 | 1,2,5,6,10, 3,4,7,8,9,1<br>14,15,16 1,12,13 | 3 P35280,P52590,Q5U316                             |
| 2275 | 1,2,5,6,11, 3,4,7,8,9,1<br>12,13,14 0,15,16 | 4 P20646,P35280,P52590,Q5RKI1                      |
| 2276 | 1,2,5,6,11, 3,4,7,8,9,1<br>12,13,15 0,14,16 | 1 O70417                                           |
| 2277 | 1,2,5,6,11, 3,4,7,8,9,1<br>12,13,16 0,14,15 | 4 O70417,P35280,Q5RKI1,Q9EQS0                      |
| 2278 | 1,2,5,6,11, 3,4,7,8,9,1<br>12,14,15 0,13,16 | 0                                                  |
| 2279 | 1,2,5,6,11, 3,4,7,8,9,1<br>12,14,16 0,13,15 | 4 P35280,P52590,Q5I0J9,Q5RKI1                      |
| 2280 | 1,2,5,6,11, 3,4,7,8,9,1<br>12,15,16 0,13,14 | 1 O70417                                           |
| 2281 | 1,2,5,6,11, 3,4,7,8,9,1<br>13,14,15 0,12,16 | 4 O70417,P01835,Q68G31,Q923V8                      |
| 2282 | 1,2,5,6,11, 3,4,7,8,9,1<br>13,14,16 0,12,15 | 6 O70417,P01835,P35280,P52590,Q5RKI1,Q9EQS0        |
| 2283 | 1,2,5,6,11, 3,4,7,8,9,1<br>13,15,16 0,12,14 | 2 O70417,Q9EQS0                                    |
| 2284 | 1,2,5,6,11, 3,4,7,8,9,1<br>14,15,16 0,12,13 | 3 O70417,P52590,Q923V8                             |

|      |                                             |                                                               |
|------|---------------------------------------------|---------------------------------------------------------------|
| 2285 | 1,2,5,6,12, 3,4,7,8,9,1<br>13,14,15 0,11,16 | 5 O70417,P01835,P19814,P35280,Q6P6R2                          |
| 2286 | 1,2,5,6,12, 3,4,7,8,9,1<br>13,14,16 0,11,15 | 5 P01835,P35280,P52590,Q5RKI1,Q6P6R2                          |
| 2287 | 1,2,5,6,12, 3,4,7,8,9,1<br>13,15,16 0,11,14 | 5 O70417,P01835,P35280,Q6B345,Q6P6R2                          |
| 2288 | 1,2,5,6,12, 3,4,7,8,9,1<br>14,15,16 0,11,13 | 3 P35280,P52590,Q6P6R2                                        |
| 2289 | 1,2,5,6,13, 3,4,7,8,9,1<br>14,15,16 0,11,12 | 6 O70417,P01835,P35280,P52590,Q62714,Q6P6R2                   |
| 2290 | 1,2,5,7,8,9 3,4,6,12,1<br>,10,11 3,14,15,16 | 3 iRT-Kit_WR_fusion,P06760,P70545                             |
| 2291 | 1,2,5,7,8,9 3,4,6,11,1<br>,10,12 3,14,15,16 | 4 iRT-Kit_WR_fusion,P29315,P35745,Q03191                      |
| 2292 | 1,2,5,7,8,9 3,4,6,11,1<br>,10,13 2,14,15,16 | 3 P29315,Q66H69,Q9Z1F2                                        |
| 2293 | 1,2,5,7,8,9 3,4,6,11,1<br>,10,14 2,13,15,16 | 3 P00762,P29315,Q9Z1F2                                        |
| 2294 | 1,2,5,7,8,9 3,4,6,11,1<br>,10,15 2,13,14,16 | 6 iRT-Kit_WR_fusion,P00762,P19132,P35745,Q9Z0V6,Q9Z1F2        |
| 2295 | 1,2,5,7,8,9 3,4,6,11,1<br>,10,16 2,13,14,15 | 2 iRT-Kit_WR_fusion,P70545                                    |
| 2296 | 1,2,5,7,8,9 3,4,6,10,1<br>,11,12 3,14,15,16 | 4 iRT-Kit_WR_fusion,P06760,Q03191,Q812E4                      |
| 2297 | 1,2,5,7,8,9 3,4,6,10,1<br>,11,13 2,14,15,16 | 3 iRT-Kit_WR_fusion,P06760,Q66H69                             |
| 2298 | 1,2,5,7,8,9 3,4,6,10,1<br>,11,14 2,13,15,16 | 4 iRT-Kit_WR_fusion,P06760,P0DMW0;P0DMW1,Q812E4               |
| 2299 | 1,2,5,7,8,9 3,4,6,10,1<br>,11,15 2,13,14,16 | 7 iRT-Kit_WR_fusion,P06760,P19132,Q6IFU8,Q6IMF3,Q6P6Q2,Q9Z0V6 |
| 2300 | 1,2,5,7,8,9 3,4,6,10,1<br>,11,16 2,13,14,15 | 7 iRT-Kit_WR_fusion,P02782,P06760,P09456,P30120,Q812E4,Q9JHB9 |
| 2301 | 1,2,5,7,8,9 3,4,6,10,1<br>,12,13 1,14,15,16 | 5 iRT-Kit_WR_fusion,P29315,Q03191,Q66H69,Q8CJD3               |
| 2302 | 1,2,5,7,8,9 3,4,6,10,1<br>,12,14 1,13,15,16 | 3 iRT-Kit_WR_fusion,P29315,Q8CJD3                             |
| 2303 | 1,2,5,7,8,9 3,4,6,10,1<br>,12,15 1,13,14,16 | 6 iRT-Kit_WR_fusion,P19132,P19814,P35745,Q8CJD3,Q9Z0V6        |
| 2304 | 1,2,5,7,8,9 3,4,6,10,1<br>,12,16 1,13,14,15 | 3 iRT-Kit_WR_fusion,Q03191,Q8CJD3                             |

|      |                        |                          |   |                                                      |
|------|------------------------|--------------------------|---|------------------------------------------------------|
| 2305 | 1,2,5,7,8,9<br>,13,14  | 3,4,6,10,1<br>1,12,15,16 | 1 | P29315                                               |
| 2306 | 1,2,5,7,8,9<br>,13,15  | 3,4,6,10,1<br>1,12,14,16 | 2 | iRT-Kit_WR_fusion,P19132                             |
| 2307 | 1,2,5,7,8,9<br>,13,16  | 3,4,6,10,1<br>1,12,14,15 | 1 | iRT-Kit_WR_fusion                                    |
| 2308 | 1,2,5,7,8,9<br>,14,15  | 3,4,6,10,1<br>1,12,13,16 | 3 | iRT-Kit_WR_fusion,P00714,P19132                      |
| 2309 | 1,2,5,7,8,9<br>,14,16  | 3,4,6,10,1<br>1,12,13,15 | 0 |                                                      |
| 2310 | 1,2,5,7,8,9<br>,15,16  | 3,4,6,10,1<br>1,12,13,14 | 3 | iRT-Kit_WR_fusion,P19132,Q9Z0V6                      |
| 2311 | 1,2,5,7,8,1<br>0,11,12 | 3,4,6,9,13,<br>14,15,16  | 6 | iRT-Kit_WR_fusion,P23593,P29315,P47967,Q5I0D1,Q66H69 |
| 2312 | 1,2,5,7,8,1<br>0,11,13 | 3,4,6,9,12,<br>14,15,16  | 3 | P25809,P29315,Q66H69                                 |
| 2313 | 1,2,5,7,8,1<br>0,11,14 | 3,4,6,9,12,<br>13,15,16  | 3 | P06760,P29315,Q66H69                                 |
| 2314 | 1,2,5,7,8,1<br>0,11,15 | 3,4,6,9,12,<br>13,14,16  | 7 | P19132,Q4FZU2,Q66H69,Q6IFU8,Q6IG05,Q6IMF3,Q6P6Q2     |
| 2315 | 1,2,5,7,8,1<br>0,11,16 | 3,4,6,9,12,<br>13,14,15  | 6 | P02782,P09456,P30120,Q00715,Q66H69,Q9JHB9            |
| 2316 | 1,2,5,7,8,1<br>0,12,13 | 3,4,6,9,11,<br>14,15,16  | 6 | iRT-Kit_WR_fusion,P19814,P25809,P29315,P47967,Q66H69 |
| 2317 | 1,2,5,7,8,1<br>0,12,14 | 3,4,6,9,11,<br>13,15,16  | 6 | iRT-Kit_WR_fusion,P19814,P29315,Q5RLM2,Q66H69,Q9Z1F2 |
| 2318 | 1,2,5,7,8,1<br>0,12,15 | 3,4,6,9,11,<br>13,14,16  | 6 | iRT-Kit_WR_fusion,P19132,P19814,P35745,Q66H69,Q9Z1F2 |
| 2319 | 1,2,5,7,8,1<br>0,12,16 | 3,4,6,9,11,<br>13,14,15  | 3 | iRT-Kit_WR_fusion,Q5RLM2,Q66H69                      |
| 2320 | 1,2,5,7,8,1<br>0,13,14 | 3,4,6,9,11,<br>12,15,16  | 6 | P25809,P29315,Q62714,Q66H69,Q9WUW8,Q9Z1F2            |
| 2321 | 1,2,5,7,8,1<br>0,13,15 | 3,4,6,9,11,<br>12,14,16  | 6 | P19132,P36860,Q62714,Q63618,Q66H69,Q9Z1F2            |
| 2322 | 1,2,5,7,8,1<br>0,13,16 | 3,4,6,9,11,<br>12,14,15  | 4 | Q63618,Q64093,Q66H69,Q9WUW8                          |
| 2323 | 1,2,5,7,8,1<br>0,14,15 | 3,4,6,9,11,<br>12,13,16  | 5 | P00714,P19132,P54921,Q62714,Q9Z1F2                   |
| 2324 | 1,2,5,7,8,1<br>0,14,16 | 3,4,6,9,11,<br>12,13,15  | 3 | P57113,Q5RLM2,Q9WUW8                                 |

|      |                        |                         |    |                                                                                                                      |
|------|------------------------|-------------------------|----|----------------------------------------------------------------------------------------------------------------------|
| 2325 | 1,2,5,7,8,1<br>0,15,16 | 3,4,6,9,11,<br>12,13,14 | 12 | B2RYW9,O70594,P19132,P19468,P48508,P53790,Q05175,Q3ZAV1,Q63424,Q64093,Q8R431,Q9<br>WTW7                              |
| 2326 | 1,2,5,7,8,1<br>1,12,13 | 3,4,6,9,10,<br>14,15,16 | 6  | iRT-Kit_WR_fusion,P29315,P47967,Q5I0D1,Q66H69,Q811M5                                                                 |
| 2327 | 1,2,5,7,8,1<br>1,12,14 | 3,4,6,9,10,<br>13,15,16 | 7  | iRT-Kit_WR_fusion,P06760,P11883,P29315,Q66H69,Q6IG05,Q811M5                                                          |
| 2328 | 1,2,5,7,8,1<br>1,12,15 | 3,4,6,9,10,<br>13,14,16 | 8  | iRT-Kit_WR_fusion,P19132,Q4FZU2,Q66H69,Q6IFU8,Q6IG05,Q6IMF3,Q6P6Q2                                                   |
| 2329 | 1,2,5,7,8,1<br>1,12,16 | 3,4,6,9,10,<br>13,14,15 | 9  | iRT-Kit_WR_fusion,P02782,P08723,P09456,P30120,Q00715,Q66H69,Q6IG05,Q9JHB9                                            |
| 2330 | 1,2,5,7,8,1<br>1,13,14 | 3,4,6,9,10,<br>12,15,16 | 4  | P06760,P29315,Q66H69,Q811M5                                                                                          |
| 2331 | 1,2,5,7,8,1<br>1,13,15 | 3,4,6,9,10,<br>12,14,16 | 7  | iRT-Kit_WR_fusion,Q4FZU2,Q66H69,Q6IFU8,Q6IG05,Q6IMF3,Q6P6Q2                                                          |
| 2332 | 1,2,5,7,8,1<br>1,13,16 | 3,4,6,9,10,<br>12,14,15 | 7  | iRT-Kit_WR_fusion,P02782,P08723,P09456,P30120,Q66H69,Q9JHB9                                                          |
| 2333 | 1,2,5,7,8,1<br>1,14,15 | 3,4,6,9,10,<br>12,13,16 | 7  | P06760,P08649,Q4FZU2,Q6IFU8,Q6IG05,Q6IMF3,Q6P6Q2                                                                     |
| 2334 | 1,2,5,7,8,1<br>1,14,16 | 3,4,6,9,10,<br>12,13,15 | 7  | P02782,P08649,P09456,P30120,Q00715,Q812E4,Q9JHB9                                                                     |
| 2335 | 1,2,5,7,8,1<br>1,15,16 | 3,4,6,9,10,<br>12,13,14 | 14 | B2RYW9,iRT-<br>Kit_WR_fusion,P02782,P08649,P08723,P09456,P30120,Q4FZU2,Q6IFU8,Q6IG05,Q6IMF3,Q6P6Q<br>2,Q8CJ52,Q9JHB9 |
| 2336 | 1,2,5,7,8,1<br>2,13,14 | 3,4,6,9,10,<br>11,15,16 | 5  | iRT-Kit_WR_fusion,P19814,P29315,Q66H69,Q811M5                                                                        |
| 2337 | 1,2,5,7,8,1<br>2,13,15 | 3,4,6,9,10,<br>11,14,16 | 4  | iRT-Kit_WR_fusion,P19132,P19814,Q66H69                                                                               |
| 2338 | 1,2,5,7,8,1<br>2,13,16 | 3,4,6,9,10,<br>11,14,15 | 2  | iRT-Kit_WR_fusion,Q66H69                                                                                             |
| 2339 | 1,2,5,7,8,1<br>2,14,15 | 3,4,6,9,10,<br>11,13,16 | 5  | iRT-Kit_WR_fusion,P00714,P19132,P19814,Q6IG05                                                                        |
| 2340 | 1,2,5,7,8,1<br>2,14,16 | 3,4,6,9,10,<br>11,13,15 | 2  | iRT-Kit_WR_fusion,Q5RLM2                                                                                             |
| 2341 | 1,2,5,7,8,1<br>2,15,16 | 3,4,6,9,10,<br>11,13,14 | 3  | iRT-Kit_WR_fusion,P19132,Q6IG05                                                                                      |
| 2342 | 1,2,5,7,8,1<br>3,14,15 | 3,4,6,9,10,<br>11,12,16 | 2  | P19132,Q62714                                                                                                        |
| 2343 | 1,2,5,7,8,1<br>3,14,16 | 3,4,6,9,10,<br>11,12,15 | 2  | Q62714,Q9WUW8                                                                                                        |
| 2344 | 1,2,5,7,8,1<br>3,15,16 | 3,4,6,9,10,<br>11,12,14 | 3  | B2RYW9,Q62714,Q66H69                                                                                                 |

|      |                        |                         |                                             |
|------|------------------------|-------------------------|---------------------------------------------|
| 2345 | 1,2,5,7,8,1<br>4,15,16 | 3,4,6,9,10,<br>11,12,13 | 3 B2RYW9,P19132,Q62714                      |
| 2346 | 1,2,5,7,9,1<br>0,11,12 | 3,4,6,8,13,<br>14,15,16 | 2 P00762,Q03191                             |
| 2347 | 1,2,5,7,9,1<br>0,11,13 | 3,4,6,8,12,<br>14,15,16 | 2 P00762,Q9R168                             |
| 2348 | 1,2,5,7,9,1<br>0,11,14 | 3,4,6,8,12,<br>13,15,16 | 2 P00762,Q9R168                             |
| 2349 | 1,2,5,7,9,1<br>0,11,15 | 3,4,6,8,12,<br>13,14,16 | 1 P00762                                    |
| 2350 | 1,2,5,7,9,1<br>0,11,16 | 3,4,6,8,12,<br>13,14,15 | 2 P70549,Q9R168                             |
| 2351 | 1,2,5,7,9,1<br>0,12,13 | 3,4,6,8,11,<br>14,15,16 | 5 P00762,P29315,Q03191,Q6AY61,Q9QZK9        |
| 2352 | 1,2,5,7,9,1<br>0,12,14 | 3,4,6,8,11,<br>13,15,16 | 4 P00762,P29315,Q03191,Q6AY61               |
| 2353 | 1,2,5,7,9,1<br>0,12,15 | 3,4,6,8,11,<br>13,14,16 | 6 O54728,P00762,P35745,Q03191,Q6AY61,Q99041 |
| 2354 | 1,2,5,7,9,1<br>0,12,16 | 3,4,6,8,11,<br>13,14,15 | 4 Q03191,Q10743,Q6AY61,Q99041               |
| 2355 | 1,2,5,7,9,1<br>0,13,14 | 3,4,6,8,11,<br>12,15,16 | 4 P00762,P29315,Q9QZK9,Q9R168               |
| 2356 | 1,2,5,7,9,1<br>0,13,15 | 3,4,6,8,11,<br>12,14,16 | 3 O70417,P00762,Q8CFN2                      |
| 2357 | 1,2,5,7,9,1<br>0,13,16 | 3,4,6,8,11,<br>12,14,15 | 1 Q9R168                                    |
| 2358 | 1,2,5,7,9,1<br>0,14,15 | 3,4,6,8,11,<br>12,13,16 | 4 P00714,P00762,P02625,P30120               |
| 2359 | 1,2,5,7,9,1<br>0,14,16 | 3,4,6,8,11,<br>12,13,15 | 1 Q9R168                                    |
| 2360 | 1,2,5,7,9,1<br>0,15,16 | 3,4,6,8,11,<br>12,13,14 | 0                                           |
| 2361 | 1,2,5,7,9,1<br>1,12,13 | 3,4,6,8,10,<br>14,15,16 | 4 O70417,P54921,Q03191,Q62761;Q62762;Q62763 |
| 2362 | 1,2,5,7,9,1<br>1,12,14 | 3,4,6,8,10,<br>13,15,16 | 3 P00762,Q03191,Q62761;Q62762;Q62763        |
| 2363 | 1,2,5,7,9,1<br>1,12,15 | 3,4,6,8,10,<br>13,14,16 | 3 P00762,Q03191,Q62761;Q62762;Q62763        |
| 2364 | 1,2,5,7,9,1<br>1,12,16 | 3,4,6,8,10,<br>13,14,15 | 1 Q03191                                    |

|      |                         |                         |   |                                    |
|------|-------------------------|-------------------------|---|------------------------------------|
| 2365 | 1,2,5,7,9,1<br>1,13,14  | 3,4,6,8,10,<br>12,15,16 | 3 | P00762,P0DMW0;P0DMW1,Q9R168        |
| 2366 | 1,2,5,7,9,1<br>1,13,15  | 3,4,6,8,10,<br>12,14,16 | 4 | O70417,P00762,P02625,P0DMW0;P0DMW1 |
| 2367 | 1,2,5,7,9,1<br>1,13,16  | 3,4,6,8,10,<br>12,14,15 | 3 | O70417,P54921,Q9R168               |
| 2368 | 1,2,5,7,9,1<br>1,14,15  | 3,4,6,8,10,<br>12,13,16 | 4 | P00762,P02625,P0DMW0;P0DMW1,Q9R168 |
| 2369 | 1,2,5,7,9,1<br>1,14,16  | 3,4,6,8,10,<br>12,13,15 | 2 | P70549,Q9R168                      |
| 2370 | 1,2,5,7,9,1<br>1,15,16  | 3,4,6,8,10,<br>12,13,14 | 2 | O70417,Q9R168                      |
| 2371 | 1,2,5,7,9,1<br>2,13,14  | 3,4,6,8,10,<br>11,15,16 | 4 | P00762,P29315,Q03191,Q6AY61        |
| 2372 | 1,2,5,7,9,1<br>2,13,15  | 3,4,6,8,10,<br>11,14,16 | 5 | O70417,P00762,Q03191,Q6AY61,Q99041 |
| 2373 | 1,2,5,7,9,1<br>2,13,16  | 3,4,6,8,10,<br>11,14,15 | 2 | Q03191,Q6AY61                      |
| 2374 | 1,2,5,7,9,1<br>2,14,15  | 3,4,6,8,10,<br>11,13,16 | 4 | P00714,P00762,P02625,Q6AY61        |
| 2375 | 1,2,5,7,9,1<br>2,14,16  | 3,4,6,8,10,<br>11,13,15 | 2 | Q03191,Q6AY61                      |
| 2376 | 1,2,5,7,9,1<br>2,15,16  | 3,4,6,8,10,<br>11,13,14 | 3 | Q03191,Q6AY61,Q99041               |
| 2377 | 1,2,5,7,9,1<br>3,14,15  | 3,4,6,8,10,<br>11,12,16 | 4 | P00762,P01835,P02625,P0DMW0;P0DMW1 |
| 2378 | 1,2,5,7,9,1<br>3,14,16  | 3,4,6,8,10,<br>11,12,15 | 1 | Q9R168                             |
| 2379 | 1,2,5,7,9,1<br>3,15,16  | 3,4,6,8,10,<br>11,12,14 | 2 | O70417,Q9R168                      |
| 2380 | 1,2,5,7,9,1<br>4,15,16  | 3,4,6,8,10,<br>11,12,13 | 1 | Q9R168                             |
| 2381 | 1,2,5,7,10,<br>11,12,13 | 3,4,6,8,9,1<br>4,15,16  | 3 | P23593,P47967,Q5I0D1               |
| 2382 | 1,2,5,7,10,<br>11,12,14 | 3,4,6,8,9,1<br>3,15,16  | 2 | P00762,P23593                      |
| 2383 | 1,2,5,7,10,<br>11,12,15 | 3,4,6,8,9,1<br>3,14,16  | 2 | P00762,P23593                      |
| 2384 | 1,2,5,7,10,<br>11,12,16 | 3,4,6,8,9,1<br>3,14,15  | 0 |                                    |

|      |                                             |                                             |
|------|---------------------------------------------|---------------------------------------------|
| 2385 | 1,2,5,7,10, 3,4,6,8,9,1<br>11,13,14 2,15,16 | 1 P00762                                    |
| 2386 | 1,2,5,7,10, 3,4,6,8,9,1<br>11,13,15 2,14,16 | 2 O70417,P00762                             |
| 2387 | 1,2,5,7,10, 3,4,6,8,9,1<br>11,13,16 2,14,15 | 1 O70417                                    |
| 2388 | 1,2,5,7,10, 3,4,6,8,9,1<br>11,14,15 2,13,16 | 1 P00762                                    |
| 2389 | 1,2,5,7,10, 3,4,6,8,9,1<br>11,14,16 2,13,15 | 1 Q9R168                                    |
| 2390 | 1,2,5,7,10, 3,4,6,8,9,1<br>11,15,16 2,13,14 | 2 O70417,P17988                             |
| 2391 | 1,2,5,7,10, 3,4,6,8,9,1<br>12,13,14 1,15,16 | 6 P00762,P01835,P19814,P29315,Q6AY61,Q6P6S4 |
| 2392 | 1,2,5,7,10, 3,4,6,8,9,1<br>12,13,15 1,14,16 | 5 O70417,P00762,P01835,P19814,Q6AY61        |
| 2393 | 1,2,5,7,10, 3,4,6,8,9,1<br>12,13,16 1,14,15 | 2 P01835,Q6AY61                             |
| 2394 | 1,2,5,7,10, 3,4,6,8,9,1<br>12,14,15 1,13,16 | 5 P00714,P00762,P19814,Q62902,Q6AY61        |
| 2395 | 1,2,5,7,10, 3,4,6,8,9,1<br>12,14,16 1,13,15 | 1 Q6AY61                                    |
| 2396 | 1,2,5,7,10, 3,4,6,8,9,1<br>12,15,16 1,13,14 | 1 Q6AY61                                    |
| 2397 | 1,2,5,7,10, 3,4,6,8,9,1<br>13,14,15 1,12,16 | 3 O88797,P00762,P01835                      |
| 2398 | 1,2,5,7,10, 3,4,6,8,9,1<br>13,14,16 1,12,15 | 4 P01835,P09527,Q6P6S4,Q9WUW8               |
| 2399 | 1,2,5,7,10, 3,4,6,8,9,1<br>13,15,16 1,12,14 | 3 O70417,P01835,P09527                      |
| 2400 | 1,2,5,7,10, 3,4,6,8,9,1<br>14,15,16 1,12,13 | 1 P09527                                    |
| 2401 | 1,2,5,7,11, 3,4,6,8,9,1<br>12,13,14 0,15,16 | 1 Q811M5                                    |
| 2402 | 1,2,5,7,11, 3,4,6,8,9,1<br>12,13,15 0,14,16 | 1 O70417                                    |
| 2403 | 1,2,5,7,11, 3,4,6,8,9,1<br>12,13,16 0,14,15 | 2 O70417,P47967                             |
| 2404 | 1,2,5,7,11, 3,4,6,8,9,1<br>12,14,15 0,13,16 | 0                                           |

|      |                                             |                                                    |
|------|---------------------------------------------|----------------------------------------------------|
| 2405 | 1,2,5,7,11, 3,4,6,8,9,1<br>12,14,16 0,13,15 | 0                                                  |
| 2406 | 1,2,5,7,11, 3,4,6,8,9,1<br>12,15,16 0,13,14 | 1 O70417                                           |
| 2407 | 1,2,5,7,11, 3,4,6,8,9,1<br>13,14,15 0,12,16 | 2 O70417,P01835                                    |
| 2408 | 1,2,5,7,11, 3,4,6,8,9,1<br>13,14,16 0,12,15 | 2 P01835,Q9R168                                    |
| 2409 | 1,2,5,7,11, 3,4,6,8,9,1<br>13,15,16 0,12,14 | 1 O70417                                           |
| 2410 | 1,2,5,7,11, 3,4,6,8,9,1<br>14,15,16 0,12,13 | 0                                                  |
| 2411 | 1,2,5,7,12, 3,4,6,8,9,1<br>13,14,15 0,11,16 | 3 P01835,P19814,Q6AY61                             |
| 2412 | 1,2,5,7,12, 3,4,6,8,9,1<br>13,14,16 0,11,15 | 3 P01835,Q6AY61,Q6P6S4                             |
| 2413 | 1,2,5,7,12, 3,4,6,8,9,1<br>13,15,16 0,11,14 | 3 O70417,P01835,Q6AY61                             |
| 2414 | 1,2,5,7,12, 3,4,6,8,9,1<br>14,15,16 0,11,13 | 1 Q6AY61                                           |
| 2415 | 1,2,5,7,13, 3,4,6,8,9,1<br>14,15,16 0,11,12 | 3 O70417,P01835,Q62714                             |
| 2416 | 1,2,5,8,9,1 3,4,6,7,13,<br>0,11,12 14,15,16 | 1 Q03191                                           |
| 2417 | 1,2,5,8,9,1 3,4,6,7,12,<br>0,11,13 14,15,16 | 0                                                  |
| 2418 | 1,2,5,8,9,1 3,4,6,7,12,<br>0,11,14 13,15,16 | 0                                                  |
| 2419 | 1,2,5,8,9,1 3,4,6,7,12,<br>0,11,15 13,14,16 | 3 P07943,Q6IMF3,Q99MH3                             |
| 2420 | 1,2,5,8,9,1 3,4,6,7,12,<br>0,11,16 13,14,15 | 1 P70549                                           |
| 2421 | 1,2,5,8,9,1 3,4,6,7,11,<br>0,12,13 14,15,16 | 3 P29315,Q03191,Q99041                             |
| 2422 | 1,2,5,8,9,1 3,4,6,7,11,<br>0,12,14 13,15,16 | 3 P00714,P29315,Q99041                             |
| 2423 | 1,2,5,8,9,1 3,4,6,7,11,<br>0,12,15 13,14,16 | 7 P00714,P11598,P19132,P34901,P35745,Q99041,Q99MH3 |
| 2424 | 1,2,5,8,9,1 3,4,6,7,11,<br>0,12,16 13,14,15 | 2 Q03191,Q99041                                    |



|      |                        |                         |                                             |
|------|------------------------|-------------------------|---------------------------------------------|
| 2425 | 1,2,5,8,9,1<br>0,13,14 | 3,4,6,7,11,<br>12,15,16 | 1 P29315                                    |
| 2426 | 1,2,5,8,9,1<br>0,13,15 | 3,4,6,7,11,<br>12,14,16 | 1 P19132                                    |
| 2427 | 1,2,5,8,9,1<br>0,13,16 | 3,4,6,7,11,<br>12,14,15 | 0                                           |
| 2428 | 1,2,5,8,9,1<br>0,14,15 | 3,4,6,7,11,<br>12,13,16 | 5 P00714,P05369,P11598,P19132,P97840        |
| 2429 | 1,2,5,8,9,1<br>0,14,16 | 3,4,6,7,11,<br>12,13,15 | 0                                           |
| 2430 | 1,2,5,8,9,1<br>0,15,16 | 3,4,6,7,11,<br>12,13,14 | 1 P19132                                    |
| 2431 | 1,2,5,8,9,1<br>1,12,13 | 3,4,6,7,10,<br>14,15,16 | 2 Q03191,Q5RKI1                             |
| 2432 | 1,2,5,8,9,1<br>1,12,14 | 3,4,6,7,10,<br>13,15,16 | 2 Q03191,Q5RKI1                             |
| 2433 | 1,2,5,8,9,1<br>1,12,15 | 3,4,6,7,10,<br>13,14,16 | 6 P19132,P36376,Q03191,Q6IG05,Q6IMF3,Q99MH3 |
| 2434 | 1,2,5,8,9,1<br>1,12,16 | 3,4,6,7,10,<br>13,14,15 | 3 O88797,Q03191,Q5RKI1                      |
| 2435 | 1,2,5,8,9,1<br>1,13,14 | 3,4,6,7,10,<br>12,15,16 | 2 P0DMW0;P0DMW1,Q5RKI1                      |
| 2436 | 1,2,5,8,9,1<br>1,13,15 | 3,4,6,7,10,<br>12,14,16 | 1 Q6IMF3                                    |
| 2437 | 1,2,5,8,9,1<br>1,13,16 | 3,4,6,7,10,<br>12,14,15 | 1 Q5RKI1                                    |
| 2438 | 1,2,5,8,9,1<br>1,14,15 | 3,4,6,7,10,<br>12,13,16 | 5 P00714,P07943,P0DMW0;P0DMW1,Q6IFU8,Q6IMF3 |
| 2439 | 1,2,5,8,9,1<br>1,14,16 | 3,4,6,7,10,<br>12,13,15 | 2 Q5RKI1,Q812E4                             |
| 2440 | 1,2,5,8,9,1<br>1,15,16 | 3,4,6,7,10,<br>12,13,14 | 3 Q6IFU8,Q6IMF3,Q6P6Q2                      |
| 2441 | 1,2,5,8,9,1<br>2,13,14 | 3,4,6,7,10,<br>11,15,16 | 4 P17988,P29315,Q5RKI1,Q8CJD3               |
| 2442 | 1,2,5,8,9,1<br>2,13,15 | 3,4,6,7,10,<br>11,14,16 | 4 P11598,P19132,Q8CJD3,Q99041               |
| 2443 | 1,2,5,8,9,1<br>2,13,16 | 3,4,6,7,10,<br>11,14,15 | 3 Q03191,Q5RKI1,Q8CJD3                      |
| 2444 | 1,2,5,8,9,1<br>2,14,15 | 3,4,6,7,10,<br>11,13,16 | 5 P00714,P11598,P19132,Q8CJD3,Q99041        |

|      |                         |                         |                               |
|------|-------------------------|-------------------------|-------------------------------|
| 2445 | 1,2,5,8,9,1<br>2,14,16  | 3,4,6,7,10,<br>11,13,15 | 2 Q5RKI1,Q8CJD3               |
| 2446 | 1,2,5,8,9,1<br>2,15,16  | 3,4,6,7,10,<br>11,13,14 | 3 P19132,Q8CJD3,Q99041        |
| 2447 | 1,2,5,8,9,1<br>3,14,15  | 3,4,6,7,10,<br>11,12,16 | 2 P00714,P19132               |
| 2448 | 1,2,5,8,9,1<br>3,14,16  | 3,4,6,7,10,<br>11,12,15 | 1 Q5RKI1                      |
| 2449 | 1,2,5,8,9,1<br>3,15,16  | 3,4,6,7,10,<br>11,12,14 | 0                             |
| 2450 | 1,2,5,8,9,1<br>4,15,16  | 3,4,6,7,10,<br>11,12,13 | 3 P00714,P47967,P97840        |
| 2451 | 1,2,5,8,10,<br>11,12,13 | 3,4,6,7,9,1<br>4,15,16  | 1 Q66H69                      |
| 2452 | 1,2,5,8,10,<br>11,12,14 | 3,4,6,7,9,1<br>3,15,16  | 0                             |
| 2453 | 1,2,5,8,10,<br>11,12,15 | 3,4,6,7,9,1<br>3,14,16  | 2 Q6IG05,Q6IMF3               |
| 2454 | 1,2,5,8,10,<br>11,12,16 | 3,4,6,7,9,1<br>3,14,15  | 0                             |
| 2455 | 1,2,5,8,10,<br>11,13,14 | 3,4,6,7,9,1<br>2,15,16  | 1 Q68G31                      |
| 2456 | 1,2,5,8,10,<br>11,13,15 | 3,4,6,7,9,1<br>2,14,16  | 2 Q68G31,Q6IMF3               |
| 2457 | 1,2,5,8,10,<br>11,13,16 | 3,4,6,7,9,1<br>2,14,15  | 0                             |
| 2458 | 1,2,5,8,10,<br>11,14,15 | 3,4,6,7,9,1<br>2,13,16  | 3 Q6IFU8,Q6IMF3,Q6P6Q2        |
| 2459 | 1,2,5,8,10,<br>11,14,16 | 3,4,6,7,9,1<br>2,13,15  | 0                             |
| 2460 | 1,2,5,8,10,<br>11,15,16 | 3,4,6,7,9,1<br>2,13,14  | 3 Q6IFU8,Q6IMF3,Q6P6Q2        |
| 2461 | 1,2,5,8,10,<br>12,13,14 | 3,4,6,7,9,1<br>1,15,16  | 1 P29315                      |
| 2462 | 1,2,5,8,10,<br>12,13,15 | 3,4,6,7,9,1<br>1,14,16  | 3 P19132,P19814,P22006        |
| 2463 | 1,2,5,8,10,<br>12,13,16 | 3,4,6,7,9,1<br>1,14,15  | 0                             |
| 2464 | 1,2,5,8,10,<br>12,14,15 | 3,4,6,7,9,1<br>1,13,16  | 4 P00714,P19132,P19814,Q63617 |

|      |                                             |                                      |
|------|---------------------------------------------|--------------------------------------|
| 2465 | 1,2,5,8,10, 3,4,6,7,9,1<br>12,14,16 1,13,15 | 0                                    |
| 2466 | 1,2,5,8,10, 3,4,6,7,9,1<br>12,15,16 1,13,14 | 2 P19132,Q5QE79                      |
| 2467 | 1,2,5,8,10, 3,4,6,7,9,1<br>13,14,15 1,12,16 | 3 P00714,P19132,Q63617               |
| 2468 | 1,2,5,8,10, 3,4,6,7,9,1<br>13,14,16 1,12,15 | 0                                    |
| 2469 | 1,2,5,8,10, 3,4,6,7,9,1<br>13,15,16 1,12,14 | 0                                    |
| 2470 | 1,2,5,8,10, 3,4,6,7,9,1<br>14,15,16 1,12,13 | 1 Q63617                             |
| 2471 | 1,2,5,8,11, 3,4,6,7,9,1<br>12,13,14 0,15,16 | 2 Q5RKI1,Q811M5                      |
| 2472 | 1,2,5,8,11, 3,4,6,7,9,1<br>12,13,15 0,14,16 | 2 Q6IG05,Q6IMF3                      |
| 2473 | 1,2,5,8,11, 3,4,6,7,9,1<br>12,13,16 0,14,15 | 2 P30120,Q5RKI1                      |
| 2474 | 1,2,5,8,11, 3,4,6,7,9,1<br>12,14,15 0,13,16 | 4 Q6IFU8,Q6IG05,Q6IMF3,Q6P6Q2        |
| 2475 | 1,2,5,8,11, 3,4,6,7,9,1<br>12,14,16 0,13,15 | 1 Q5RKI1                             |
| 2476 | 1,2,5,8,11, 3,4,6,7,9,1<br>12,15,16 0,13,14 | 5 Q5QE79,Q6IFU8,Q6IG05,Q6IMF3,Q6P6Q2 |
| 2477 | 1,2,5,8,11, 3,4,6,7,9,1<br>13,14,15 0,12,16 | 3 Q6IFU8,Q6IMF3,Q6P6Q2               |
| 2478 | 1,2,5,8,11, 3,4,6,7,9,1<br>13,14,16 0,12,15 | 2 P30120,Q5RKI1                      |
| 2479 | 1,2,5,8,11, 3,4,6,7,9,1<br>13,15,16 0,12,14 | 4 O70417,Q6IFU8,Q6IMF3,Q6P6Q2        |
| 2480 | 1,2,5,8,11, 3,4,6,7,9,1<br>14,15,16 0,12,13 | 3 Q6IFU8,Q6IMF3,Q6P6Q2               |
| 2481 | 1,2,5,8,12, 3,4,6,7,9,1<br>13,14,15 0,11,16 | 3 P00714,P19132,P19814               |
| 2482 | 1,2,5,8,12, 3,4,6,7,9,1<br>13,14,16 0,11,15 | 1 Q5RKI1                             |
| 2483 | 1,2,5,8,12, 3,4,6,7,9,1<br>13,15,16 0,11,14 | 0                                    |
| 2484 | 1,2,5,8,12, 3,4,6,7,9,1<br>14,15,16 0,11,13 | 1 P00714                             |

|      |                                             |                                                                                                                                                                                                  |
|------|---------------------------------------------|--------------------------------------------------------------------------------------------------------------------------------------------------------------------------------------------------|
| 2485 | 1,2,5,8,13, 3,4,6,7,9,1<br>14,15,16 0,11,12 | 1 Q62714                                                                                                                                                                                         |
| 2486 | 1,2,5,9,10, 3,4,6,7,8,1<br>11,12,13 4,15,16 | 5 O70417,P00762,P20761,Q03191,Q62761;Q62762;Q62763                                                                                                                                               |
| 2487 | 1,2,5,9,10, 3,4,6,7,8,1<br>11,12,14 3,15,16 | 4 P00762,P20761,Q03191,Q62761;Q62762;Q62763                                                                                                                                                      |
| 2488 | 1,2,5,9,10, 3,4,6,7,8,1<br>11,12,15 3,14,16 | 9 B0BNN3,O70417,P00762,P20761,Q03191,Q5QE79,Q62761;Q62762;Q62763,Q99MH3,Q9Z2L0                                                                                                                   |
| 2489 | 1,2,5,9,10, 3,4,6,7,8,1<br>11,12,16 3,14,15 | 5 O70417,P70549,Q03191,Q5QE79,Q9Z2L0                                                                                                                                                             |
| 2490 | 1,2,5,9,10, 3,4,6,7,8,1<br>11,13,14 2,15,16 | 2 O70417,P00762                                                                                                                                                                                  |
| 2491 | 1,2,5,9,10, 3,4,6,7,8,1<br>11,13,15 2,14,16 | 2 O70417,P00762                                                                                                                                                                                  |
| 2492 | 1,2,5,9,10, 3,4,6,7,8,1<br>11,13,16 2,14,15 | 2 D3ZUC6,O70417                                                                                                                                                                                  |
| 2493 | 1,2,5,9,10, 3,4,6,7,8,1<br>11,14,15 2,13,16 | 2 P00714,P00762                                                                                                                                                                                  |
| 2494 | 1,2,5,9,10, 3,4,6,7,8,1<br>11,14,16 2,13,15 | 3 P70549,Q9R168,Q9Z2L0                                                                                                                                                                           |
| 2495 | 1,2,5,9,10, 3,4,6,7,8,1<br>11,15,16 2,13,14 | 3 O70417,Q5QE79,Q9Z2L0                                                                                                                                                                           |
| 2496 | 1,2,5,9,10, 3,4,6,7,8,1<br>12,13,14 1,15,16 | 20 P00762,P02780,P02781,P02782,P06761,P08723,P0C0A9,P11598,P22273,P22282,P22283,P4646<br>2,Q03191,Q5M8C6,Q62902,Q63617,Q8CJ52,Q99041,Q9QW07,Q9QZK9                                               |
| 2497 | 1,2,5,9,10, 3,4,6,7,8,1<br>12,13,15 1,14,16 | O70417,P00762,P02780,P02781,P02782,P06761,P07150,P07647,P08723,P0C0A9,P11598,P2076<br>24 1,P22273,P22282,P22283,P30120,P46462,Q03191,Q5M8C6,Q62902,Q63617,Q8CFN2,Q99041,<br>Q9QZK9               |
| 2498 | 1,2,5,9,10, 3,4,6,7,8,1<br>12,13,16 1,14,15 | 9 O70417,P06761,P07150,P22273,P22282,Q03191,Q5M8C6,Q63617,Q99041                                                                                                                                 |
| 2499 | 1,2,5,9,10, 3,4,6,7,8,1<br>12,14,15 1,13,16 | 21 P00714,P00762,P02780,P02781,P02782,P06761,P07647,P08723,P09456,P0C0A9,P11598,P2227<br>3,P22282,P22283,P24368,P30120,P46462,Q5M8C6,Q62902,Q63617,Q99041                                        |
| 2500 | 1,2,5,9,10, 3,4,6,7,8,1<br>12,14,16 1,13,15 | 9 P06761,P11598,P22273,P22282,Q03191,Q5M8C6,Q62902,Q63617,Q99041                                                                                                                                 |
| 2501 | 1,2,5,9,10, 3,4,6,7,8,1<br>12,15,16 1,13,14 | 13 O70417,P02780,P06761,P11598,P22273,P22282,P46462,Q03191,Q5M8C6,Q5QE79,Q62902,Q6<br>3617,Q99041                                                                                                |
| 2502 | 1,2,5,9,10, 3,4,6,7,8,1<br>13,14,15 1,12,16 | O70417,P00714,P00762,P02780,P02781,P02782,P06761,P07647,P08723,P0C0A9,P11598,P1202<br>26 0,P22273,P22282,P22283,P30120,P36374,P46462,Q5M8C6,Q62902,Q63617,Q8CFN2,Q99041,Q<br>9QW07,Q9QZK9,Q9ROT3 |
| 2503 | 1,2,5,9,10, 3,4,6,7,8,1<br>13,14,16 1,12,15 | 7 O70417,P02780,P06761,P22273,P22282,Q5M8C6,Q63617                                                                                                                                               |

|      |                                             |    |                                                                                                                                                                                                                                                      |
|------|---------------------------------------------|----|------------------------------------------------------------------------------------------------------------------------------------------------------------------------------------------------------------------------------------------------------|
| 2504 | 1,2,5,9,10, 3,4,6,7,8,1<br>13,15,16 1,12,14 | 15 | O70417,P02780,P06761,P06911,P07150,P11598,P12020,P22273,P22282,P46462,Q5M8C6,Q5QE79,Q63617,Q63751,Q99041                                                                                                                                             |
| 2505 | 1,2,5,9,10, 3,4,6,7,8,1<br>14,15,16 1,12,13 | 15 | P00714,P02780,P06761,P11598,P12020,P22273,P22282,P22283,P46462,P47967,Q5M8C6,Q62902,Q63617,Q99041,Q9R0T3                                                                                                                                             |
| 2506 | 1,2,5,9,11, 3,4,6,7,8,1<br>12,13,14 0,15,16 | 32 | O35077,O70257,O70377,O70417,O70594,P07151,P0DMW0,P0DMW1,P19468,P20761,P46844,P53790,P57113,Q03191,Q03248,Q05175,Q3ZAV1,Q5I0E9,Q5M7T9,Q5RKI1,Q62761;Q62762;Q62763,Q63270,Q63424,Q63598,Q64093,Q6AY41,Q6MG61,Q6Q0N1,Q80W57,Q8R431,Q923S2,Q9WTW7,Q9Z0W7 |
| 2507 | 1,2,5,9,11, 3,4,6,7,8,1<br>12,13,15 0,14,16 | 10 | O35077,O70417,P07151,P20761,P46844,P57113,Q03191,Q5QE79,Q62761;Q62762;Q62763,Q923S2                                                                                                                                                                  |
| 2508 | 1,2,5,9,11, 3,4,6,7,8,1<br>12,13,16 0,14,15 | 5  | O70417,P54921,Q03191,Q05175,Q5RKI1                                                                                                                                                                                                                   |
| 2509 | 1,2,5,9,11, 3,4,6,7,8,1<br>12,14,15 0,13,16 | 19 | O35077,O55004,O70257,O70594,P00714,P07151,P19468,P20761,P28570,P46844,P53790,P57113,Q03191,Q3ZAV1,Q5M7T9,Q62761;Q62762;Q62763,Q63424,Q64093,Q8R431                                                                                                   |
| 2510 | 1,2,5,9,11, 3,4,6,7,8,1<br>12,14,16 0,13,15 | 5  | O70257,O70594,Q03191,Q5RKI1,Q63618                                                                                                                                                                                                                   |
| 2511 | 1,2,5,9,11, 3,4,6,7,8,1<br>12,15,16 0,13,14 | 4  | O70257,O70417,Q03191,Q5QE79                                                                                                                                                                                                                          |
| 2512 | 1,2,5,9,11, 3,4,6,7,8,1<br>13,14,15 0,12,16 | 9  | O70417,P02625,P07151,P0DMW0,P0DMW1,P46844,P53790,P57113,Q03248,Q9WTW7                                                                                                                                                                                |
| 2513 | 1,2,5,9,11, 3,4,6,7,8,1<br>13,14,16 0,12,15 | 6  | O70417,P0DMW0,P0DMW1,P30904,Q5RKI1,Q63598,Q9R168                                                                                                                                                                                                     |
| 2514 | 1,2,5,9,11, 3,4,6,7,8,1<br>13,15,16 0,12,14 | 3  | O70417,Q5QE79,Q63751                                                                                                                                                                                                                                 |
| 2515 | 1,2,5,9,11, 3,4,6,7,8,1<br>14,15,16 0,12,13 | 2  | O70417,Q923V8                                                                                                                                                                                                                                        |
| 2516 | 1,2,5,9,12, 3,4,6,7,8,1<br>13,14,15 0,11,16 | 22 | O70417,P00714,P00762,P02780,P02781,P02782,P06761,P07151,P07647,P08723,P0C0A9,P11598,P22273,P22282,P22283,P28570,P46462,Q5M8C6,Q62902,Q63617,Q99041,Q9R0T3                                                                                            |
| 2517 | 1,2,5,9,12, 3,4,6,7,8,1<br>13,14,16 0,11,15 | 9  | O70417,P06761,P22273,P22282,Q03191,Q5RKI1,Q63617,Q6P6R2,Q99041                                                                                                                                                                                       |
| 2518 | 1,2,5,9,12, 3,4,6,7,8,1<br>13,15,16 0,11,14 | 15 | O70417,P06761,P07150,P08937,P11598,P22273,P22282,Q03191,Q5M8C6,Q5QE79,Q63617,Q63751,Q6B345,Q6P6R2,Q99041                                                                                                                                             |
| 2519 | 1,2,5,9,12, 3,4,6,7,8,1<br>14,15,16 0,11,13 | 13 | P00714,P02780,P06761,P11598,P22273,P22282,P22283,Q5M8C6,Q62902,Q63617,Q6P6R2,Q99041,Q9R0T3                                                                                                                                                           |
| 2520 | 1,2,5,9,13, 3,4,6,7,8,1<br>14,15,16 0,11,12 | 10 | O70417,P02780,P06761,P11598,P22273,P22282,Q5M8C6,Q63617,Q99041,Q9R0T3                                                                                                                                                                                |
| 2521 | 1,2,5,10,1 3,4,6,7,8,9<br>1,12,13,14 ,15,16 | 4  | O70417,P20646,P23593,P35280                                                                                                                                                                                                                          |
| 2522 | 1,2,5,10,1 3,4,6,7,8,9<br>1,12,13,15 ,14,16 | 4  | O70417,P20761,P23593,Q5QE79                                                                                                                                                                                                                          |

|      |                          |                          |    |                                                                                                                                                           |
|------|--------------------------|--------------------------|----|-----------------------------------------------------------------------------------------------------------------------------------------------------------|
| 2523 | 1,2,5,10,1<br>1,12,13,16 | 3,4,6,7,8,9<br>,14,15    | 3  | O70417,P35280,Q5QE79                                                                                                                                      |
| 2524 | 1,2,5,10,1<br>1,12,14,15 | 3,4,6,7,8,9<br>,13,16    | 1  | Q62902                                                                                                                                                    |
| 2525 | 1,2,5,10,1<br>1,12,14,16 | 3,4,6,7,8,9<br>,13,15    | 1  | P35280                                                                                                                                                    |
| 2526 | 1,2,5,10,1<br>1,12,15,16 | 3,4,6,7,8,9<br>,13,14    | 3  | O70417,Q5QE79,Q63751                                                                                                                                      |
| 2527 | 1,2,5,10,1<br>1,13,14,15 | 3,4,6,7,8,9<br>,12,16    | 1  | O70417                                                                                                                                                    |
| 2528 | 1,2,5,10,1<br>1,13,14,16 | 3,4,6,7,8,9<br>,12,15    | 2  | O70417,P35280                                                                                                                                             |
| 2529 | 1,2,5,10,1<br>1,13,15,16 | 3,4,6,7,8,9<br>,12,14    | 3  | O70417,Q5QE79,Q63751                                                                                                                                      |
| 2530 | 1,2,5,10,1<br>1,14,15,16 | 3,4,6,7,8,9<br>,12,13    | 2  | O70417,Q5QE79                                                                                                                                             |
| 2531 | 1,2,5,10,1<br>2,13,14,15 | 3,4,6,7,8,9<br>,11,16    | 22 | O70417,P00714,P02780,P02781,P02782,P06761,P07150,P08723,P0C0A9,P11598,P22006,P22273,P22282,P22283,P35280,P46462,Q5M8C6,Q62902,Q63617,Q6P6R2,Q812E4,Q99041 |
| 2532 | 1,2,5,10,1<br>2,13,14,16 | 3,4,6,7,8,9<br>,11,15    | 8  | P06761,P07150,P22273,P22282,P35280,Q63617,Q6P6R2,Q6P6S4                                                                                                   |
| 2533 | 1,2,5,10,1<br>2,13,15,16 | 3,4,6,7,8,9<br>,11,14    | 12 | O70417,P06761,P07150,P22273,P22282,P35280,Q5M8C6,Q5QE79,Q63617,Q63751,Q6P6R2,Q99041                                                                       |
| 2534 | 1,2,5,10,1<br>2,14,15,16 | 3,4,6,7,8,9<br>,11,13    | 14 | P00714,P02780,P06761,P11598,P22273,P22282,P35280,P46462,Q5M8C6,Q5QE79,Q62902,Q63617,Q6P6R2,Q99041                                                         |
| 2535 | 1,2,5,10,1<br>3,14,15,16 | 3,4,6,7,8,9<br>,11,12    | 12 | O70417,P02780,P06761,P07150,P22273,P22282,P35280,P70709,Q5M8C6,Q63617,Q6P6R2,Q6Q7Y5                                                                       |
| 2536 | 1,2,5,11,1<br>2,13,14,15 | 3,4,6,7,8,9<br>,10,16    | 3  | O70417,P23739,Q6P6R2                                                                                                                                      |
| 2537 | 1,2,5,11,1<br>2,13,14,16 | 3,4,6,7,8,9<br>,10,15    | 4  | O70417,P35280,Q5RKI1,Q6P6R2                                                                                                                               |
| 2538 | 1,2,5,11,1<br>2,13,15,16 | 3,4,6,7,8,9<br>,10,14    | 5  | O70417,P08937,Q5QE79,Q63751,Q6P6R2                                                                                                                        |
| 2539 | 1,2,5,11,1<br>2,14,15,16 | 3,4,6,7,8,9<br>,10,13    | 3  | O70417,Q5QE79,Q6P6R2                                                                                                                                      |
| 2540 | 1,2,5,11,1<br>3,14,15,16 | 3,4,6,7,8,9<br>,10,12    | 4  | O70417,P26772,Q5QE79,Q6P6R2                                                                                                                               |
| 2541 | 1,2,5,12,1<br>3,14,15,16 | 3,4,6,7,8,9<br>,10,11    | 12 | O70417,P06761,P07150,P22273,P22282,P35280,Q5M8C6,Q5QE79,Q63617,Q6B345,Q6P6R2,Q6P6S4                                                                       |
| 2542 | 1,2,6,7,8,9<br>,10,11    | 3,4,5,12,1<br>3,14,15,16 | 17 | Kit_WR_fusion,P02631,P08723,P18421,P19629,P29315,P31044,P50280,P55091,P70545,Q5GRG2,Q68G31,Q6P6R2,Q6P6S4,Q78P75,Q812E4,Q9JI85                             |

|      |                       |                          |                                                                                                                                                                                                  |
|------|-----------------------|--------------------------|--------------------------------------------------------------------------------------------------------------------------------------------------------------------------------------------------|
| 2543 | 1,2,6,7,8,9<br>,10,12 | 3,4,5,11,1<br>3,14,15,16 | 8 iRT-Kit_WR_fusion,P02454,P02631,P19629,P29315,P35745,Q63598,Q9Z1F2                                                                                                                             |
| 2544 | 1,2,6,7,8,9<br>,10,13 | 3,4,5,11,1<br>2,14,15,16 | 8 iRT-Kit_WR_fusion,P02454,P02631,P19629,P29315,Q68G31,Q78P75,Q9Z1F2                                                                                                                             |
| 2545 | 1,2,6,7,8,9<br>,10,14 | 3,4,5,11,1<br>2,13,15,16 | 8 iRT-Kit_WR_fusion,P00762,P02631,P19629,P29315,P97840,Q68G31,Q9Z1F2                                                                                                                             |
| 2546 | 1,2,6,7,8,9<br>,10,15 | 3,4,5,11,1<br>2,13,14,16 | 10 iRT-Kit_WR_fusion,P00762,P02631,P19629,P35745,Q63474,Q63598,Q68G31,Q99MH3,Q9Z1F2                                                                                                              |
| 2547 | 1,2,6,7,8,9<br>,10,16 | 3,4,5,11,1<br>2,13,14,15 | 6 D3ZUC6,iRT-Kit_WR_fusion,P02631,P19629,P70545,Q63598                                                                                                                                           |
| 2548 | 1,2,6,7,8,9<br>,11,12 | 3,4,5,10,1<br>3,14,15,16 | iRT-<br>15 Kit_WR_fusion,P06911,P08723,P12020,P19629,P50280,Q09326,Q5GRG2,Q63493,Q6P6S4,Q78P75,Q812E4,Q9JHB9,Q9JI85,Q9QW07                                                                       |
| 2549 | 1,2,6,7,8,9<br>,11,13 | 3,4,5,10,1<br>2,14,15,16 | iRT-<br>16 Kit_WR_fusion,P06911,P08723,P09456,P12020,P22283,P50280,Q09326,Q5GRG2,Q63493,Q63617,Q68G31,Q6P6S4,Q78P75,Q812E4,Q9JI85                                                                |
| 2550 | 1,2,6,7,8,9<br>,11,14 | 3,4,5,10,1<br>2,13,15,16 | iRT-<br>12 Kit_WR_fusion,P06911,P09456,P0DMW0;P0DMW1,P12020,P50280,Q09326,Q5GRG2,Q6P6S4,Q78P75,Q812E4,Q9JI85                                                                                     |
| 2551 | 1,2,6,7,8,9<br>,11,15 | 3,4,5,10,1<br>2,13,14,16 | iRT-<br>13 Kit_WR_fusion,P08723,P19629,P50280,Q09326,Q5GRG2,Q63493,Q6P6S4,Q78P75,Q812E4,Q8CJ52,Q99MH3,Q9QW07                                                                                     |
| 2552 | 1,2,6,7,8,9<br>,11,16 | 3,4,5,10,1<br>2,13,14,15 | iRT-<br>25 Kit_WR_fusion,P02780,P02781,P02782,P06911,P07647,P08723,P09456,P12020,P19629,P22283,P24368,P30120,P46462,P50280,P97523,Q5GRG2,Q63493,Q63617,Q6P6S4,Q78P75,Q812E4,Q9JHB9,Q9JI85,Q9QW07 |
| 2553 | 1,2,6,7,8,9<br>,12,13 | 3,4,5,10,1<br>1,14,15,16 | 4 iRT-Kit_WR_fusion,P02631,P29315,Q78P75                                                                                                                                                         |
| 2554 | 1,2,6,7,8,9<br>,12,14 | 3,4,5,10,1<br>1,13,15,16 | 4 iRT-Kit_WR_fusion,P06911,P29315,Q5GRG2                                                                                                                                                         |
| 2555 | 1,2,6,7,8,9<br>,12,15 | 3,4,5,10,1<br>1,13,14,16 | 4 iRT-Kit_WR_fusion,P19629,P35745,Q99MH3                                                                                                                                                         |
| 2556 | 1,2,6,7,8,9<br>,12,16 | 3,4,5,10,1<br>1,13,14,15 | 3 iRT-Kit_WR_fusion,P19629,P21674                                                                                                                                                                |
| 2557 | 1,2,6,7,8,9<br>,13,14 | 3,4,5,10,1<br>1,12,15,16 | 6 iRT-Kit_WR_fusion,P01835,P0DMW0;P0DMW1,P29315,Q68G31,Q78P75                                                                                                                                    |
| 2558 | 1,2,6,7,8,9<br>,13,15 | 3,4,5,10,1<br>1,12,14,16 | 4 iRT-Kit_WR_fusion,P19629,Q68G31,Q78P75                                                                                                                                                         |
| 2559 | 1,2,6,7,8,9<br>,13,16 | 3,4,5,10,1<br>1,12,14,15 | 3 iRT-Kit_WR_fusion,P02631,P19629                                                                                                                                                                |

|      |                        |                          |                                                                                                                                                                                                                        |
|------|------------------------|--------------------------|------------------------------------------------------------------------------------------------------------------------------------------------------------------------------------------------------------------------|
| 2560 | 1,2,6,7,8,9<br>,14,15  | 3,4,5,10,1<br>1,12,13,16 | 3 iRT-Kit_WR_fusion,P19629,P97840                                                                                                                                                                                      |
| 2561 | 1,2,6,7,8,9<br>,14,16  | 3,4,5,10,1<br>1,12,13,15 | 2 iRT-Kit_WR_fusion,P97840                                                                                                                                                                                             |
| 2562 | 1,2,6,7,8,9<br>,15,16  | 3,4,5,10,1<br>1,12,13,14 | 2 iRT-Kit_WR_fusion,P19629                                                                                                                                                                                             |
| 2563 | 1,2,6,7,8,1<br>0,11,12 | 3,4,5,9,13,<br>14,15,16  | iRT-<br>18 Kit_WR_fusion,P02631,P06911,P08723,P12020,P19629,P22283,P29315,P31044,P50280,Q00715,<br>Q5GRG2,Q63493,Q66H69,Q68G31,Q78P75,Q9JHB9,Q9JI85                                                                    |
| 2564 | 1,2,6,7,8,1<br>0,11,13 | 3,4,5,9,12,<br>14,15,16  | iRT-<br>17 Kit_WR_fusion,P02631,P06911,P08723,P12020,P19629,P22283,P29315,P31044,P50280,P55091,<br>Q5GRG2,Q63493,Q66H69,Q68G31,Q78P75,Q9JI85                                                                           |
| 2565 | 1,2,6,7,8,1<br>0,11,14 | 3,4,5,9,12,<br>13,15,16  | 10 P02631,P06911,P12020,P19629,P29315,P31044,P50280,Q5GRG2,Q68G31,Q9JI85                                                                                                                                               |
| 2566 | 1,2,6,7,8,1<br>0,11,15 | 3,4,5,9,12,<br>13,14,16  | iRT-<br>12 Kit_WR_fusion,P08723,P15399,P19629,P31044,P50280,Q5GRG2,Q63474,Q68G31,Q8CJ52,Q9JI8<br>5,Q9Z1F2                                                                                                              |
| 2567 | 1,2,6,7,8,1<br>0,11,16 | 3,4,5,9,12,<br>13,14,15  | iRT-<br>27 Kit_WR_fusion,P02631,P02780,P02781,P02782,P06911,P07647,P08723,P09456,P0C0A9,P12020,<br>P15399,P19629,P22283,P24368,P30120,P31044,P46462,P50280,Q00715,Q5GRG2,Q63493,Q66<br>H69,Q68G31,Q9JHB9,Q9JI85,Q9QW07 |
| 2568 | 1,2,6,7,8,1<br>0,12,13 | 3,4,5,9,11,<br>14,15,16  | iRT-<br>11 Kit_WR_fusion,P01835,P02631,P19629,P19814,P29315,P31044,Q63598,Q66H69,Q68G31,Q9Z1F<br>2                                                                                                                     |
| 2569 | 1,2,6,7,8,1<br>0,12,14 | 3,4,5,9,11,<br>13,15,16  | 10 iRT-Kit_WR_fusion,P02631,P19629,P29315,P31044,P57113,Q5GRG2,Q5RLM2,Q68G31,Q9Z1F2                                                                                                                                    |
| 2570 | 1,2,6,7,8,1<br>0,12,15 | 3,4,5,9,11,<br>13,14,16  | 10 iRT-Kit_WR_fusion,P02631,P19629,P19814,P31044,P35745,Q63474,Q63598,Q66H69,Q9Z1F2                                                                                                                                    |
| 2571 | 1,2,6,7,8,1<br>0,12,16 | 3,4,5,9,11,<br>13,14,15  | 10 iRT-Kit_WR_fusion,P02631,P19629,P31044,P46844,P57113,Q3ZAV1,Q63598,Q66H69,Q9WTW7                                                                                                                                    |
| 2572 | 1,2,6,7,8,1<br>0,13,14 | 3,4,5,9,11,<br>12,15,16  | 11 P01835,P02631,P19629,P25809,P29315,P31044,P57113,Q62714,Q66H69,Q68G31,Q9Z1F2                                                                                                                                        |
| 2573 | 1,2,6,7,8,1<br>0,13,15 | 3,4,5,9,11,<br>12,14,16  | iRT-<br>15 Kit_WR_fusion,P01835,P02631,P19629,P31044,P36860,P51907,P57113,Q62714,Q63474,Q63598<br>,Q63618,Q66H69,Q68G31,Q9Z1F2                                                                                         |
| 2574 | 1,2,6,7,8,1<br>0,13,16 | 3,4,5,9,11,<br>12,14,15  | iRT-<br>18 Kit_WR_fusion,O70257,P01835,P02631,P15399,P19468,P19629,P31044,P46844,P51907,P57113,<br>Q3ZAV1,Q63424,Q63598,Q63618,Q64093,Q66H69,Q68G31                                                                    |
| 2575 | 1,2,6,7,8,1<br>0,14,15 | 3,4,5,9,11,<br>12,13,16  | 9 P19629,P31044,P54921,P57113,Q62714,Q63474,Q63598,Q68G31,Q9Z1F2                                                                                                                                                       |



|      |                        |                         |    |                                                                                                                                                                                                                                                 |
|------|------------------------|-------------------------|----|-------------------------------------------------------------------------------------------------------------------------------------------------------------------------------------------------------------------------------------------------|
| 2576 | 1,2,6,7,8,1<br>0,14,16 | 3,4,5,9,11,<br>12,13,15 | 9  | P02631,P15399,P19629,P31044,P57113,P97580,Q30KJ2,Q63598,Q68G31<br>B2RYW9,iRT-                                                                                                                                                                   |
| 2577 | 1,2,6,7,8,1<br>0,15,16 | 3,4,5,9,11,<br>12,13,14 | 29 | Kit_WR_fusion,O70377,O70594,P02631,P15399,P19468,P19629,P31044,P38918,P46844,P48508,<br>P50280,P51907,P53790,P57113,Q03248,Q05175,Q3ZAV1,Q5I0E9,Q5M7T9,Q63424,Q63598,Q6<br>4093,Q68G31,Q6AY41,Q9R1T5,Q9WTW7,Q9Z0W7<br>iRT-                      |
| 2578 | 1,2,6,7,8,1<br>1,12,13 | 3,4,5,9,10,<br>14,15,16 | 19 | Kit_WR_fusion,P02631,P06911,P08723,P09456,P12020,P22283,P29315,P31044,P46462,P50280,<br>Q09326,Q5GRG2,Q63493,Q66H69,Q68G31,Q78P75,Q9JHB9,Q9JI85<br>iRT-                                                                                         |
| 2579 | 1,2,6,7,8,1<br>1,12,14 | 3,4,5,9,10,<br>13,15,16 | 16 | Kit_WR_fusion,P06911,P08723,P12020,P22283,P29315,P31044,P46462,P50280,Q09326,Q5GRG<br>2,Q63493,Q78P75,Q9JHB9,Q9JI85,Q9QW07<br>iRT-                                                                                                              |
| 2580 | 1,2,6,7,8,1<br>1,12,15 | 3,4,5,9,10,<br>13,14,16 | 17 | Kit_WR_fusion,P06911,P08723,P12020,P19629,P22283,P31044,P50280,Q09326,Q5GRG2,Q6349<br>3,Q66H69,Q78P75,Q8CJ52,Q9JHB9,Q9JI85,Q9QW07<br>iRT-                                                                                                       |
| 2581 | 1,2,6,7,8,1<br>1,12,16 | 3,4,5,9,10,<br>13,14,15 | 31 | Kit_WR_fusion,O35547,P02780,P02781,P02782,P04905,P05369,P06761,P06911,P07647,P08723,<br>P09456,P0C0A9,P12020,P19629,P22283,P24368,P30120,P31044,P46462,P50280,Q00715,Q5GR<br>G2,Q5M8C6,Q63493,Q66H69,Q812E4,Q8CFN2,Q9JHB9,Q9JI85,Q9QW07<br>iRT- |
| 2582 | 1,2,6,7,8,1<br>1,13,14 | 3,4,5,9,10,<br>12,15,16 | 18 | Kit_WR_fusion,P01835,P06911,P08723,P09456,P12020,P22283,P29315,P31044,P46462,P50280,<br>Q09326,Q5GRG2,Q63493,Q66H69,Q68G31,Q78P75,Q9JI85<br>iRT-                                                                                                |
| 2583 | 1,2,6,7,8,1<br>1,13,15 | 3,4,5,9,10,<br>12,14,16 | 17 | Kit_WR_fusion,P01835,P06911,P08723,P12020,P19629,P22283,P31044,P50280,Q09326,Q5GRG<br>2,Q63493,Q66H69,Q68G31,Q78P75,Q8CJ52,Q9JI85<br>iRT-                                                                                                       |
| 2584 | 1,2,6,7,8,1<br>1,13,16 | 3,4,5,9,10,<br>12,14,15 | 31 | Kit_WR_fusion,O35547,P02780,P02781,P02782,P05369,P06761,P06911,P07647,P08723,P09456,<br>P0C0A9,P12020,P19629,P22283,P24368,P30120,P31044,P46462,P50280,Q00715,Q5GRG2,Q5M<br>8C6,Q63493,Q63617,Q66H69,Q68G31,Q78P75,Q812E4,Q9JHB9,Q9JI85<br>iRT- |
| 2585 | 1,2,6,7,8,1<br>1,14,15 | 3,4,5,9,10,<br>12,13,16 | 13 | Kit_WR_fusion,P06911,P12020,P19629,P31044,P50280,Q09326,Q5GRG2,Q68G31,Q78P75,Q8CJ<br>52,Q9JI85,Q9QW07<br>iRT-                                                                                                                                   |
| 2586 | 1,2,6,7,8,1<br>1,14,16 | 3,4,5,9,10,<br>12,13,15 | 21 | Kit_WR_fusion,P02780,P02781,P02782,P06911,P07647,P08723,P09456,P0C0A9,P12020,P19629,<br>P22283,P30120,P46462,P50280,Q00715,Q5GRG2,Q812E4,Q9JHB9,Q9JI85,Q9QW07<br>B2RYW9,iRT-                                                                    |
| 2587 | 1,2,6,7,8,1<br>1,15,16 | 3,4,5,9,10,<br>12,13,14 | 23 | Kit_WR_fusion,P02780,P02781,P02782,P06911,P07647,P08723,P09456,P0C0A9,P12020,P19629,<br>P22283,P24368,P30120,P46462,P50280,Q5GRG2,Q63493,Q8CJ52,Q9JHB9,Q9JI85,Q9QW07<br>iRT-                                                                    |
| 2588 | 1,2,6,7,8,1<br>2,13,14 | 3,4,5,9,10,<br>11,15,16 | 11 | Kit_WR_fusion,P01835,P02631,P06911,P12020,P29315,P31044,Q5GRG2,Q66H69,Q68G31,Q9Z2<br>LO                                                                                                                                                         |

|      |                        |                         |                                                                      |
|------|------------------------|-------------------------|----------------------------------------------------------------------|
| 2589 | 1,2,6,7,8,1<br>2,13,15 | 3,4,5,9,10,<br>11,14,16 | 8 iRT-Kit_WR_fusion,P01835,P02631,P19629,P19814,P31044,Q66H69,Q68G31 |
| 2590 | 1,2,6,7,8,1<br>2,13,16 | 3,4,5,9,10,<br>11,14,15 | 8 iRT-Kit_WR_fusion,P01835,P02631,P06911,P12020,P19629,Q66H69,Q9JI85 |
| 2591 | 1,2,6,7,8,1<br>2,14,15 | 3,4,5,9,10,<br>11,13,16 | 3 iRT-Kit_WR_fusion,P19629,Q5GRG2                                    |
| 2592 | 1,2,6,7,8,1<br>2,14,16 | 3,4,5,9,10,<br>11,13,15 | 5 iRT-Kit_WR_fusion,P06911,P12020,P19629,Q5GRG2                      |
| 2593 | 1,2,6,7,8,1<br>2,15,16 | 3,4,5,9,10,<br>11,13,14 | 3 iRT-Kit_WR_fusion,P19629,Q63598                                    |
| 2594 | 1,2,6,7,8,1<br>3,14,15 | 3,4,5,9,10,<br>11,12,16 | 5 iRT-Kit_WR_fusion,P01835,P19629,Q62714,Q68G31                      |
| 2595 | 1,2,6,7,8,1<br>3,14,16 | 3,4,5,9,10,<br>11,12,15 | 3 P01835,Q62714,Q68G31                                               |
| 2596 | 1,2,6,7,8,1<br>3,15,16 | 3,4,5,9,10,<br>11,12,14 | 6 B2RYW9,iRT-Kit_WR_fusion,P01835,P19629,Q62714,Q68G31               |
| 2597 | 1,2,6,7,8,1<br>4,15,16 | 3,4,5,9,10,<br>11,12,13 | 5 B2RYW9,iRT-Kit_WR_fusion,P19629,P50280,Q62714                      |
| 2598 | 1,2,6,7,9,1<br>0,11,12 | 3,4,5,8,13,<br>14,15,16 | 2 O35077,P00762                                                      |
| 2599 | 1,2,6,7,9,1<br>0,11,13 | 3,4,5,8,12,<br>14,15,16 | 3 P00762,Q68G31,Q9R168                                               |
| 2600 | 1,2,6,7,9,1<br>0,11,14 | 3,4,5,8,12,<br>13,15,16 | 2 P00762,Q9R168                                                      |
| 2601 | 1,2,6,7,9,1<br>0,11,15 | 3,4,5,8,12,<br>13,14,16 | 2 P00762,Q99MH3                                                      |
| 2602 | 1,2,6,7,9,1<br>0,11,16 | 3,4,5,8,12,<br>13,14,15 | 2 D3ZUC6,Q9R168                                                      |
| 2603 | 1,2,6,7,9,1<br>0,12,13 | 3,4,5,8,11,<br>14,15,16 | 5 P00762,P01835,P29315,Q6IFW6,Q6IG02                                 |
| 2604 | 1,2,6,7,9,1<br>0,12,14 | 3,4,5,8,11,<br>13,15,16 | 4 P00762,P29315,Q6IFW6,Q6IG02                                        |
| 2605 | 1,2,6,7,9,1<br>0,12,15 | 3,4,5,8,11,<br>13,14,16 | 3 O54728,P00762,Q99MH3                                               |
| 2606 | 1,2,6,7,9,1<br>0,12,16 | 3,4,5,8,11,<br>13,14,15 | 2 D3ZUC6,Q6IG02                                                      |
| 2607 | 1,2,6,7,9,1<br>0,13,14 | 3,4,5,8,11,<br>12,15,16 | 6 P00762,P01835,P29315,Q6IFW6,Q6IG02,Q9R168                          |
| 2608 | 1,2,6,7,9,1<br>0,13,15 | 3,4,5,8,11,<br>12,14,16 | 2 P00762,P01835                                                      |

|      |                        |                         |                                      |
|------|------------------------|-------------------------|--------------------------------------|
| 2609 | 1,2,6,7,9,1<br>0,13,16 | 3,4,5,8,11,<br>12,14,15 | 4 D3ZUC6,P01835,Q6IG02,Q9R168        |
| 2610 | 1,2,6,7,9,1<br>0,14,15 | 3,4,5,8,11,<br>12,13,16 | 3 P00762,P01835,P97840               |
| 2611 | 1,2,6,7,9,1<br>0,14,16 | 3,4,5,8,11,<br>12,13,15 | 2 Q6IG02,Q9R168                      |
| 2612 | 1,2,6,7,9,1<br>0,15,16 | 3,4,5,8,11,<br>12,13,14 | 2 D3ZUC6,Q811M5                      |
| 2613 | 1,2,6,7,9,1<br>1,12,13 | 3,4,5,8,10,<br>14,15,16 | 2 O35077,P01835                      |
| 2614 | 1,2,6,7,9,1<br>1,12,14 | 3,4,5,8,10,<br>13,15,16 | 4 O35077,P00762,P0DMW0;P0DMW1,Q5GRG2 |
| 2615 | 1,2,6,7,9,1<br>1,12,15 | 3,4,5,8,10,<br>13,14,16 | 3 O35077,P00762,Q99MH3               |
| 2616 | 1,2,6,7,9,1<br>1,12,16 | 3,4,5,8,10,<br>13,14,15 | 2 D3ZUC6,Q9JHB9                      |
| 2617 | 1,2,6,7,9,1<br>1,13,14 | 3,4,5,8,10,<br>12,15,16 | 4 P00762,P01835,P0DMW0;P0DMW1,Q9R168 |
| 2618 | 1,2,6,7,9,1<br>1,13,15 | 3,4,5,8,10,<br>12,14,16 | 4 P00762,P01835,P0DMW0;P0DMW1,Q9R168 |
| 2619 | 1,2,6,7,9,1<br>1,13,16 | 3,4,5,8,10,<br>12,14,15 | 4 D3ZUC6,P01835,Q9EQS0,Q9R168        |
| 2620 | 1,2,6,7,9,1<br>1,14,15 | 3,4,5,8,10,<br>12,13,16 | 4 P00762,P0DMW0;P0DMW1,Q8CJ52,Q9R168 |
| 2621 | 1,2,6,7,9,1<br>1,14,16 | 3,4,5,8,10,<br>12,13,15 | 3 P0DMW0;P0DMW1,Q812E4,Q9R168        |
| 2622 | 1,2,6,7,9,1<br>1,15,16 | 3,4,5,8,10,<br>12,13,14 | 3 D3ZUC6,Q8CJ52,Q9R168               |
| 2623 | 1,2,6,7,9,1<br>2,13,14 | 3,4,5,8,10,<br>11,15,16 | 5 P00762,P01835,P29315,Q6IFW6,Q6IG02 |
| 2624 | 1,2,6,7,9,1<br>2,13,15 | 3,4,5,8,10,<br>11,14,16 | 2 P00762,P01835                      |
| 2625 | 1,2,6,7,9,1<br>2,13,16 | 3,4,5,8,10,<br>11,14,15 | 3 D3ZUC6,P01835,Q6IG02               |
| 2626 | 1,2,6,7,9,1<br>2,14,15 | 3,4,5,8,10,<br>11,13,16 | 2 P00762,P01835                      |
| 2627 | 1,2,6,7,9,1<br>2,14,16 | 3,4,5,8,10,<br>11,13,15 | 2 P01835,Q6IG02                      |
| 2628 | 1,2,6,7,9,1<br>2,15,16 | 3,4,5,8,10,<br>11,13,14 | 2 D3ZUC6,P01835                      |

|      |                         |                         |   |                                    |
|------|-------------------------|-------------------------|---|------------------------------------|
| 2629 | 1,2,6,7,9,1<br>3,14,15  | 3,4,5,8,10,<br>11,12,16 | 4 | P00762,P01835,P0DMW0;P0DMW1,Q9R168 |
| 2630 | 1,2,6,7,9,1<br>3,14,16  | 3,4,5,8,10,<br>11,12,15 | 4 | P01835,Q6IG02,Q9EQS0,Q9R168        |
| 2631 | 1,2,6,7,9,1<br>3,15,16  | 3,4,5,8,10,<br>11,12,14 | 3 | D3ZUC6,P01835,Q9R168               |
| 2632 | 1,2,6,7,9,1<br>4,15,16  | 3,4,5,8,10,<br>11,12,13 | 5 | P01835,P47967,P97840,Q5I0D1,Q9R168 |
| 2633 | 1,2,6,7,10,<br>11,12,13 | 3,4,5,8,9,1<br>4,15,16  | 3 | P01835,P23593,Q68G31               |
| 2634 | 1,2,6,7,10,<br>11,12,14 | 3,4,5,8,9,1<br>3,15,16  | 2 | P00762,Q5GRG2                      |
| 2635 | 1,2,6,7,10,<br>11,12,15 | 3,4,5,8,9,1<br>3,14,16  | 1 | P00762                             |
| 2636 | 1,2,6,7,10,<br>11,12,16 | 3,4,5,8,9,1<br>3,14,15  | 2 | Q00715,Q9JHB9                      |
| 2637 | 1,2,6,7,10,<br>11,13,14 | 3,4,5,8,9,1<br>2,15,16  | 4 | P00762,P01835,P36376,Q68G31        |
| 2638 | 1,2,6,7,10,<br>11,13,15 | 3,4,5,8,9,1<br>2,14,16  | 3 | P00762,P01835,Q68G31               |
| 2639 | 1,2,6,7,10,<br>11,13,16 | 3,4,5,8,9,1<br>2,14,15  | 3 | P01835,P36376,Q68G31               |
| 2640 | 1,2,6,7,10,<br>11,14,15 | 3,4,5,8,9,1<br>2,13,16  | 2 | P00762,P01835                      |
| 2641 | 1,2,6,7,10,<br>11,14,16 | 3,4,5,8,9,1<br>2,13,15  | 2 | P36376,Q9R168                      |
| 2642 | 1,2,6,7,10,<br>11,15,16 | 3,4,5,8,9,1<br>2,13,14  | 2 | P17988,Q8CJ52                      |
| 2643 | 1,2,6,7,10,<br>12,13,14 | 3,4,5,8,9,1<br>1,15,16  | 5 | O88797,P00762,P01835,P29315,Q6IG02 |
| 2644 | 1,2,6,7,10,<br>12,13,15 | 3,4,5,8,9,1<br>1,14,16  | 3 | O88797,P00762,P01835               |
| 2645 | 1,2,6,7,10,<br>12,13,16 | 3,4,5,8,9,1<br>1,14,15  | 2 | P01835,Q6IG02                      |
| 2646 | 1,2,6,7,10,<br>12,14,15 | 3,4,5,8,9,1<br>1,13,16  | 3 | O88797,P00762,P01835               |
| 2647 | 1,2,6,7,10,<br>12,14,16 | 3,4,5,8,9,1<br>1,13,15  | 2 | P01835,Q6IG02                      |
| 2648 | 1,2,6,7,10,<br>12,15,16 | 3,4,5,8,9,1<br>1,13,14  | 3 | P01835,P19629,Q63598               |

|      |                                             |                                             |
|------|---------------------------------------------|---------------------------------------------|
| 2649 | 1,2,6,7,10, 3,4,5,8,9,1<br>13,14,15 1,12,16 | 4 O88797,P00762,P01835,Q68G31               |
| 2650 | 1,2,6,7,10, 3,4,5,8,9,1<br>13,14,16 1,12,15 | 6 O88797,P01835,P14668,P36376,P57113,Q6IG02 |
| 2651 | 1,2,6,7,10, 3,4,5,8,9,1<br>13,15,16 1,12,14 | 2 O88797,P01835                             |
| 2652 | 1,2,6,7,10, 3,4,5,8,9,1<br>14,15,16 1,12,13 | 3 P01835,P09527,P57113                      |
| 2653 | 1,2,6,7,11, 3,4,5,8,9,1<br>12,13,14 0,15,16 | 2 P01835,Q5GRG2                             |
| 2654 | 1,2,6,7,11, 3,4,5,8,9,1<br>12,13,15 0,14,16 | 1 P01835                                    |
| 2655 | 1,2,6,7,11, 3,4,5,8,9,1<br>12,13,16 0,14,15 | 4 P01835,P05369,P22283,Q9JHB9               |
| 2656 | 1,2,6,7,11, 3,4,5,8,9,1<br>12,14,15 0,13,16 | 2 P01835,Q5GRG2                             |
| 2657 | 1,2,6,7,11, 3,4,5,8,9,1<br>12,14,16 0,13,15 | 4 P01835,Q00715,Q5GRG2,Q9JHB9               |
| 2658 | 1,2,6,7,11, 3,4,5,8,9,1<br>12,15,16 0,13,14 | 3 P01835,Q8CJ52,Q9JHB9                      |
| 2659 | 1,2,6,7,11, 3,4,5,8,9,1<br>13,14,15 0,12,16 | 2 P01835,Q68G31                             |
| 2660 | 1,2,6,7,11, 3,4,5,8,9,1<br>13,14,16 0,12,15 | 3 P01835,P36376,Q9R168                      |
| 2661 | 1,2,6,7,11, 3,4,5,8,9,1<br>13,15,16 0,12,14 | 3 O70417,P01835,Q8CJ52                      |
| 2662 | 1,2,6,7,11, 3,4,5,8,9,1<br>14,15,16 0,12,13 | 2 P01835,Q8CJ52                             |
| 2663 | 1,2,6,7,12, 3,4,5,8,9,1<br>13,14,15 0,11,16 | 2 O88797,P01835                             |
| 2664 | 1,2,6,7,12, 3,4,5,8,9,1<br>13,14,16 0,11,15 | 1 P01835                                    |
| 2665 | 1,2,6,7,12, 3,4,5,8,9,1<br>13,15,16 0,11,14 | 1 P01835                                    |
| 2666 | 1,2,6,7,12, 3,4,5,8,9,1<br>14,15,16 0,11,13 | 1 P01835                                    |
| 2667 | 1,2,6,7,13, 3,4,5,8,9,1<br>14,15,16 0,11,12 | 3 O88797,P01835,Q62714                      |
| 2668 | 1,2,6,8,9,1 3,4,5,7,13,<br>0,11,12 14,15,16 | 4 Q5GRG2,Q68G31,Q6P6S4,Q99MH3               |

|      |                        |                         |                                                           |
|------|------------------------|-------------------------|-----------------------------------------------------------|
| 2669 | 1,2,6,8,9,1<br>0,11,13 | 3,4,5,7,12,<br>14,15,16 | 2 Q68G31,Q6P6S4                                           |
| 2670 | 1,2,6,8,9,1<br>0,11,14 | 3,4,5,7,12,<br>13,15,16 | 3 P97840,Q5GRG2,Q68G31                                    |
| 2671 | 1,2,6,8,9,1<br>0,11,15 | 3,4,5,7,12,<br>13,14,16 | 3 Q68G31,Q6P6S4,Q99MH3                                    |
| 2672 | 1,2,6,8,9,1<br>0,11,16 | 3,4,5,7,12,<br>13,14,15 | 5 D3ZUC6,O89117,P15399,Q68G31,Q6P6S4                      |
| 2673 | 1,2,6,8,9,1<br>0,12,13 | 3,4,5,7,11,<br>14,15,16 | 2 P29315,Q68G31                                           |
| 2674 | 1,2,6,8,9,1<br>0,12,14 | 3,4,5,7,11,<br>13,15,16 | 3 P29315,P97840,Q68G31                                    |
| 2675 | 1,2,6,8,9,1<br>0,12,15 | 3,4,5,7,11,<br>13,14,16 | 4 P35745,Q63474,Q68G31,Q99MH3                             |
| 2676 | 1,2,6,8,9,1<br>0,12,16 | 3,4,5,7,11,<br>13,14,15 | 1 D3ZUC6                                                  |
| 2677 | 1,2,6,8,9,1<br>0,13,14 | 3,4,5,7,11,<br>12,15,16 | 3 P29315,P97840,Q68G31                                    |
| 2678 | 1,2,6,8,9,1<br>0,13,15 | 3,4,5,7,11,<br>12,14,16 | 3 Q63474,Q68G31,Q99MH3                                    |
| 2679 | 1,2,6,8,9,1<br>0,13,16 | 3,4,5,7,11,<br>12,14,15 | 2 D3ZUC6,Q68G31                                           |
| 2680 | 1,2,6,8,9,1<br>0,14,15 | 3,4,5,7,11,<br>12,13,16 | 5 P47967,P97840,Q63474,Q68G31,Q99MH3                      |
| 2681 | 1,2,6,8,9,1<br>0,14,16 | 3,4,5,7,11,<br>12,13,15 | 4 P47967,P97840,Q5I0D1,Q68G31                             |
| 2682 | 1,2,6,8,9,1<br>0,15,16 | 3,4,5,7,11,<br>12,13,14 | 8 D3ZUC6,P15399,P19629,P47967,P97840,Q5I0D1,Q68G31,Q811M5 |
| 2683 | 1,2,6,8,9,1<br>1,12,13 | 3,4,5,7,10,<br>14,15,16 | 5 O35077,Q5GRG2,Q5RKI1,Q68G31,Q9JI85                      |
| 2684 | 1,2,6,8,9,1<br>1,12,14 | 3,4,5,7,10,<br>13,15,16 | 5 O35077,P12020,P97840,Q5GRG2,Q5RKI1                      |
| 2685 | 1,2,6,8,9,1<br>1,12,15 | 3,4,5,7,10,<br>13,14,16 | 3 Q5GRG2,Q6P6S4,Q99MH3                                    |
| 2686 | 1,2,6,8,9,1<br>1,12,16 | 3,4,5,7,10,<br>13,14,15 | 8 D3ZUC6,P12020,Q5GRG2,Q5RKI1,Q6P6S4,Q812E4,Q9JHB9,Q9QW07 |
| 2687 | 1,2,6,8,9,1<br>1,13,14 | 3,4,5,7,10,<br>12,15,16 | 5 P0DMW0;P0DMW1,P97840,Q09326,Q5GRG2,Q68G31               |
| 2688 | 1,2,6,8,9,1<br>1,13,15 | 3,4,5,7,10,<br>12,14,16 | 4 P0DMW0;P0DMW1,Q68G31,Q6P6S4,Q99MH3                      |

|      |                         |                         |                                                           |
|------|-------------------------|-------------------------|-----------------------------------------------------------|
| 2689 | 1,2,6,8,9,1<br>1,13,16  | 3,4,5,7,10,<br>12,14,15 | 8 D3ZUC6,O89117,P09456,P30120,Q5RKI1,Q68G31,Q812E4,Q9JI85 |
| 2690 | 1,2,6,8,9,1<br>1,14,15  | 3,4,5,7,10,<br>12,13,16 | 7 P0DMW0;P0DMW1,P47967,P97840,Q5GRG2,Q68G31,Q6P6S4,Q99MH3 |
| 2691 | 1,2,6,8,9,1<br>1,14,16  | 3,4,5,7,10,<br>12,13,15 | 5 O89117,P97840,Q5GRG2,Q5RKI1,Q812E4                      |
| 2692 | 1,2,6,8,9,1<br>1,15,16  | 3,4,5,7,10,<br>12,13,14 | 5 D3ZUC6,P50280,P97840,Q6P6S4,Q9QW07                      |
| 2693 | 1,2,6,8,9,1<br>2,13,14  | 3,4,5,7,10,<br>11,15,16 | 3 P29315,P97840,Q68G31                                    |
| 2694 | 1,2,6,8,9,1<br>2,13,15  | 3,4,5,7,10,<br>11,14,16 | 2 Q68G31,Q99MH3                                           |
| 2695 | 1,2,6,8,9,1<br>2,13,16  | 3,4,5,7,10,<br>11,14,15 | 2 D3ZUC6,Q5RKI1                                           |
| 2696 | 1,2,6,8,9,1<br>2,14,15  | 3,4,5,7,10,<br>11,13,16 | 3 P47967,P97840,Q99MH3                                    |
| 2697 | 1,2,6,8,9,1<br>2,14,16  | 3,4,5,7,10,<br>11,13,15 | 3 P21674,P97840,Q5RKI1                                    |
| 2698 | 1,2,6,8,9,1<br>2,15,16  | 3,4,5,7,10,<br>11,13,14 | 0                                                         |
| 2699 | 1,2,6,8,9,1<br>3,14,15  | 3,4,5,7,10,<br>11,12,16 | 4 P0DMW0;P0DMW1,P47967,P97840,Q68G31                      |
| 2700 | 1,2,6,8,9,1<br>3,14,16  | 3,4,5,7,10,<br>11,12,15 | 3 P97840,Q5RKI1,Q68G31                                    |
| 2701 | 1,2,6,8,9,1<br>3,15,16  | 3,4,5,7,10,<br>11,12,14 | 3 D3ZUC6,P97840,Q68G31                                    |
| 2702 | 1,2,6,8,9,1<br>4,15,16  | 3,4,5,7,10,<br>11,12,13 | 4 P23593,P47967,P97840,Q5I0D1                             |
| 2703 | 1,2,6,8,10,<br>11,12,13 | 3,4,5,7,9,1<br>4,15,16  | 4 P12020,Q5GRG2,Q68G31,Q9JI85                             |
| 2704 | 1,2,6,8,10,<br>11,12,14 | 3,4,5,7,9,1<br>3,15,16  | 3 P12020,Q5GRG2,Q68G31                                    |
| 2705 | 1,2,6,8,10,<br>11,12,15 | 3,4,5,7,9,1<br>3,14,16  | 4 P19629,Q5GRG2,Q68G31,Q99MH3                             |
| 2706 | 1,2,6,8,10,<br>11,12,16 | 3,4,5,7,9,1<br>3,14,15  | 7 P12020,P15399,P30120,Q00715,Q5GRG2,Q68G31,Q9JHB9        |
| 2707 | 1,2,6,8,10,<br>11,13,14 | 3,4,5,7,9,1<br>2,15,16  | 2 Q5GRG2,Q68G31                                           |
| 2708 | 1,2,6,8,10,<br>11,13,15 | 3,4,5,7,9,1<br>2,14,16  | 2 P15399,Q68G31                                           |

|      |                                             |                                                                          |
|------|---------------------------------------------|--------------------------------------------------------------------------|
| 2709 | 1,2,6,8,10, 3,4,5,7,9,1<br>11,13,16 2,14,15 | 4 P15399,P30120,Q68G31,Q9JI85                                            |
| 2710 | 1,2,6,8,10, 3,4,5,7,9,1<br>11,14,15 2,13,16 | 3 P15399,Q5GRG2,Q68G31                                                   |
| 2711 | 1,2,6,8,10, 3,4,5,7,9,1<br>11,14,16 2,13,15 | 5 O89117,P15399,P97580,Q5GRG2,Q68G31                                     |
| 2712 | 1,2,6,8,10, 3,4,5,7,9,1<br>11,15,16 2,13,14 | 4 P15399,P19629,P50280,Q68G31                                            |
| 2713 | 1,2,6,8,10, 3,4,5,7,9,1<br>12,13,14 1,15,16 | 3 P14668,P29315,Q68G31                                                   |
| 2714 | 1,2,6,8,10, 3,4,5,7,9,1<br>12,13,15 1,14,16 | 1 Q68G31                                                                 |
| 2715 | 1,2,6,8,10, 3,4,5,7,9,1<br>12,13,16 1,14,15 | 2 P02631,Q68G31                                                          |
| 2716 | 1,2,6,8,10, 3,4,5,7,9,1<br>12,14,15 1,13,16 | 2 P54921,Q68G31                                                          |
| 2717 | 1,2,6,8,10, 3,4,5,7,9,1<br>12,14,16 1,13,15 | 2 P14668,Q68G31                                                          |
| 2718 | 1,2,6,8,10, 3,4,5,7,9,1<br>12,15,16 1,13,14 | 4 P15399,P19629,Q63598,Q68G31                                            |
| 2719 | 1,2,6,8,10, 3,4,5,7,9,1<br>13,14,15 1,12,16 | 1 Q68G31                                                                 |
| 2720 | 1,2,6,8,10, 3,4,5,7,9,1<br>13,14,16 1,12,15 | 4 P14668,P15399,P97580,Q68G31                                            |
| 2721 | 1,2,6,8,10, 3,4,5,7,9,1<br>13,15,16 1,12,14 | 3 P15399,P19629,Q68G31                                                   |
| 2722 | 1,2,6,8,10, 3,4,5,7,9,1<br>14,15,16 1,12,13 | 10 P14668,P15399,P19629,P47967,P54921,P97580,P97840,Q30KJ2,Q5I0D1,Q68G31 |
| 2723 | 1,2,6,8,11, 3,4,5,7,9,1<br>12,13,14 0,15,16 | 6 P12020,Q09326,Q5GRG2,Q5RKI1,Q68G31,Q9JI85                              |
| 2724 | 1,2,6,8,11, 3,4,5,7,9,1<br>12,13,15 0,14,16 | 4 P12020,Q5GRG2,Q68G31,Q9JI85                                            |
| 2725 | 1,2,6,8,11, 3,4,5,7,9,1<br>12,13,16 0,14,15 | 9 O35547,P02782,P05369,P12020,P30120,Q5GRG2,Q5RKI1,Q68G31,Q9JI85         |
| 2726 | 1,2,6,8,11, 3,4,5,7,9,1<br>12,14,15 0,13,16 | 3 P12020,Q5GRG2,Q68G31                                                   |
| 2727 | 1,2,6,8,11, 3,4,5,7,9,1<br>12,14,16 0,13,15 | 6 P12020,P30120,Q00715,Q5GRG2,Q5RKI1,Q9JHB9                              |
| 2728 | 1,2,6,8,11, 3,4,5,7,9,1<br>12,15,16 0,13,14 | 4 P12020,P50280,Q5GRG2,Q9QW07                                            |



|      |                                             |                                                                                 |
|------|---------------------------------------------|---------------------------------------------------------------------------------|
| 2729 | 1,2,6,8,11, 3,4,5,7,9,1<br>13,14,15 0,12,16 | 2 Q5GRG2,Q68G31                                                                 |
| 2730 | 1,2,6,8,11, 3,4,5,7,9,1<br>13,14,16 0,12,15 | 6 P02782,P30120,Q5GRG2,Q5RKI1,Q68G31,Q9JI85                                     |
| 2731 | 1,2,6,8,11, 3,4,5,7,9,1<br>13,15,16 0,12,14 | 3 P30120,Q68G31,Q9JI85                                                          |
| 2732 | 1,2,6,8,11, 3,4,5,7,9,1<br>14,15,16 0,12,13 | 5 P15399,P50280,P97840,Q5GRG2,Q68G31                                            |
| 2733 | 1,2,6,8,12, 3,4,5,7,9,1<br>13,14,15 0,11,16 | 1 Q68G31                                                                        |
| 2734 | 1,2,6,8,12, 3,4,5,7,9,1<br>13,14,16 0,11,15 | 2 Q5RKI1,Q68G31                                                                 |
| 2735 | 1,2,6,8,12, 3,4,5,7,9,1<br>13,15,16 0,11,14 | 1 Q68G31                                                                        |
| 2736 | 1,2,6,8,12, 3,4,5,7,9,1<br>14,15,16 0,11,13 | 0                                                                               |
| 2737 | 1,2,6,8,13, 3,4,5,7,9,1<br>14,15,16 0,11,12 | 3 P97840,Q62714,Q68G31                                                          |
| 2738 | 1,2,6,9,10, 3,4,5,7,8,1<br>11,12,13 4,15,16 | 6 B0LT89,O35077,P00762,P20646,Q68G31,Q99MH3                                     |
| 2739 | 1,2,6,9,10, 3,4,5,7,8,1<br>11,12,14 3,15,16 | 2 O35077,P00762                                                                 |
| 2740 | 1,2,6,9,10, 3,4,5,7,8,1<br>11,12,15 3,14,16 | 5 B0BNN3,O35077,P00762,Q99MH3,Q9WUW8                                            |
| 2741 | 1,2,6,9,10, 3,4,5,7,8,1<br>11,12,16 3,14,15 | 1 D3ZUC6                                                                        |
| 2742 | 1,2,6,9,10, 3,4,5,7,8,1<br>11,13,14 2,15,16 | 4 P00762,P0DMW0;P0DMW1,P97840,Q68G31                                            |
| 2743 | 1,2,6,9,10, 3,4,5,7,8,1<br>11,13,15 2,14,16 | 4 O70417,P00762,Q68G31,Q99MH3                                                   |
| 2744 | 1,2,6,9,10, 3,4,5,7,8,1<br>11,13,16 2,14,15 | 4 D3ZUC6,O70417,O89117,Q68G31                                                   |
| 2745 | 1,2,6,9,10, 3,4,5,7,8,1<br>11,14,15 2,13,16 | 5 P00762,P0DMW0;P0DMW1,P47967,P97840,Q99MH3                                     |
| 2746 | 1,2,6,9,10, 3,4,5,7,8,1<br>11,14,16 2,13,15 | 4 D3ZUC6,O89117,P97840,Q9R168                                                   |
| 2747 | 1,2,6,9,10, 3,4,5,7,8,1<br>11,15,16 2,13,14 | 3 D3ZUC6,Q811M5,Q99MH3                                                          |
| 2748 | 1,2,6,9,10, 3,4,5,7,8,1<br>12,13,14 1,15,16 | 11 P00762,P02780,P08649,P20646,P22273,Q4FZU2,Q5M8C6,Q6IFW6,Q6IG02,Q6IMF3,Q6P6Q2 |

|      |                                             |                                                                                                                                                                                           |
|------|---------------------------------------------|-------------------------------------------------------------------------------------------------------------------------------------------------------------------------------------------|
| 2749 | 1,2,6,9,10, 3,4,5,7,8,1<br>12,13,15 1,14,16 | 9 P00762,P02780,P06760,P08649,P22273,Q4G075,Q5M8C6,Q99041,Q99MH3                                                                                                                          |
| 2750 | 1,2,6,9,10, 3,4,5,7,8,1<br>12,13,16 1,14,15 | 7 D3ZUC6,P06760,P08649,Q4FZU2,Q4G075,Q6IFW6,Q6IG02                                                                                                                                        |
| 2751 | 1,2,6,9,10, 3,4,5,7,8,1<br>12,14,15 1,13,16 | 11 P00762,P02780,P02782,P22273,P30120,P47967,P97840,Q4G075,Q5M8C6,Q62902,Q99MH3                                                                                                           |
| 2752 | 1,2,6,9,10, 3,4,5,7,8,1<br>12,14,16 1,13,15 | 6 D3ZUC6,P22273,P97840,Q4FZU2,Q6IFW6,Q6IG02                                                                                                                                               |
| 2753 | 1,2,6,9,10, 3,4,5,7,8,1<br>12,15,16 1,13,14 | 7 D3ZUC6,P06760,P22273,Q4G075,Q811M5,Q99041,Q99MH3                                                                                                                                        |
| 2754 | 1,2,6,9,10, 3,4,5,7,8,1<br>13,14,15 1,12,16 | 9 P00762,P01835,P02780,P22273,P47967,P97840,Q5M8C6,Q5PQL7,Q68G31                                                                                                                          |
| 2755 | 1,2,6,9,10, 3,4,5,7,8,1<br>13,14,16 1,12,15 | 7 D3ZUC6,O54800;Q5DWW2,P14668,P97840,Q4FZU2,Q6IFW6,Q6IG02                                                                                                                                 |
| 2756 | 1,2,6,9,10, 3,4,5,7,8,1<br>13,15,16 1,12,14 | 8 D3ZUC6,O70417,P06760,P11883,P22273,Q5I0D1,Q63751,Q811M5                                                                                                                                 |
| 2757 | 1,2,6,9,10, 3,4,5,7,8,1<br>14,15,16 1,12,13 | 7 D3ZUC6,P06760,P22273,P47967,P97840,Q5I0D1,Q811M5                                                                                                                                        |
| 2758 | 1,2,6,9,11, 3,4,5,7,8,1<br>12,13,14 0,15,16 | O35077,O70594,P0DMW0;P0DMW1,P12368,P19468,P20646,P48508,P53790,Q05175,Q5I0E9,Q<br>22 5RKI1,Q62761;Q62762;Q62763,Q63270,Q63355,Q63424,Q64093,Q6MG61,Q6Q0N1,Q8R431,Q<br>923S2,Q9WTW7,Q9Z0W7 |
| 2759 | 1,2,6,9,11, 3,4,5,7,8,1<br>12,13,15 0,14,16 | 6 O35077,O70417,Q62761;Q62762;Q62763,Q923S2,Q99MH3,Q9WUW8                                                                                                                                 |
| 2760 | 1,2,6,9,11, 3,4,5,7,8,1<br>12,13,16 0,14,15 | 5 D3ZUC6,O35077,O70417,P54921,Q5RKI1                                                                                                                                                      |
| 2761 | 1,2,6,9,11, 3,4,5,7,8,1<br>12,14,15 0,13,16 | 12 O35077,O70257,P0DMW0;P0DMW1,P28570,P46844,P97840,Q62761;Q62762;Q62763,Q63424,<br>Q64093,Q8R431,Q99MH3,Q9WUW8                                                                           |
| 2762 | 1,2,6,9,11, 3,4,5,7,8,1<br>12,14,16 0,13,15 | 6 D3ZUC6,O35077,O70594,Q5RKI1,Q63618,Q8R431                                                                                                                                               |
| 2763 | 1,2,6,9,11, 3,4,5,7,8,1<br>12,15,16 0,13,14 | 4 D3ZUC6,O70417,Q99MH3,Q9WUW8                                                                                                                                                             |
| 2764 | 1,2,6,9,11, 3,4,5,7,8,1<br>13,14,15 0,12,16 | 3 P0DMW0;P0DMW1,P97840,Q68G31                                                                                                                                                             |
| 2765 | 1,2,6,9,11, 3,4,5,7,8,1<br>13,14,16 0,12,15 | 8 D3ZUC6,O89117,P0DMW0;P0DMW1,P12368,P97840,Q5RKI1,Q9EQS0,Q9R168                                                                                                                          |
| 2766 | 1,2,6,9,11, 3,4,5,7,8,1<br>13,15,16 0,12,14 | 3 D3ZUC6,O70417,Q5RLM2                                                                                                                                                                    |
| 2767 | 1,2,6,9,11, 3,4,5,7,8,1<br>14,15,16 0,12,13 | 4 D3ZUC6,P0DMW0;P0DMW1,P47967,P97840                                                                                                                                                      |
| 2768 | 1,2,6,9,12, 3,4,5,7,8,1<br>13,14,15 0,11,16 | 7 P00762,P01835,P02780,P22273,P97840,Q5M8C6,Q6B345                                                                                                                                        |

|      |                                             |                                                                                        |
|------|---------------------------------------------|----------------------------------------------------------------------------------------|
| 2769 | 1,2,6,9,12, 3,4,5,7,8,1<br>13,14,16 0,11,15 | 6 P01835,Q4FZU2,Q5RKI1,Q6B345,Q6IFW6,Q6IG02                                            |
| 2770 | 1,2,6,9,12, 3,4,5,7,8,1<br>13,15,16 0,11,14 | 8 D3ZUC6,O70417,P01835,P06760,P08937,Q4G075,Q63751,Q6B345                              |
| 2771 | 1,2,6,9,12, 3,4,5,7,8,1<br>14,15,16 0,11,13 | 5 P06760,P22273,P47967,P97840,Q6B345                                                   |
| 2772 | 1,2,6,9,13, 3,4,5,7,8,1<br>14,15,16 0,11,12 | 7 P01835,P06760,P0DMW0;P0DMW1,P22273,P47967,P97840,Q5I0D1                              |
| 2773 | 1,2,6,10,1 3,4,5,7,8,9<br>1,12,13,14 ,15,16 | 3 P20646,P35280,Q68G31                                                                 |
| 2774 | 1,2,6,10,1 3,4,5,7,8,9<br>1,12,13,15 ,14,16 | 5 O70417,P06760,P20646,P20760,Q68G31                                                   |
| 2775 | 1,2,6,10,1 3,4,5,7,8,9<br>1,12,13,16 ,14,15 | 5 O70417,P06760,P20646,P35280,Q68G31                                                   |
| 2776 | 1,2,6,10,1 3,4,5,7,8,9<br>1,12,14,15 ,13,16 | 1 P20646                                                                               |
| 2777 | 1,2,6,10,1 3,4,5,7,8,9<br>1,12,14,16 ,13,15 | 2 P20646,P35280                                                                        |
| 2778 | 1,2,6,10,1 3,4,5,7,8,9<br>1,12,15,16 ,13,14 | 2 P06760,Q5QE79                                                                        |
| 2779 | 1,2,6,10,1 3,4,5,7,8,9<br>1,13,14,15 ,12,16 | 2 P01835,Q68G31                                                                        |
| 2780 | 1,2,6,10,1 3,4,5,7,8,9<br>1,13,14,16 ,12,15 | 4 O89117,P35280,P36376,Q68G31                                                          |
| 2781 | 1,2,6,10,1 3,4,5,7,8,9<br>1,13,15,16 ,12,14 | 5 O70417,P06760,Q5QE79,Q63751,Q68G31                                                   |
| 2782 | 1,2,6,10,1 3,4,5,7,8,9<br>1,14,15,16 ,12,13 | 0                                                                                      |
| 2783 | 1,2,6,10,1 3,4,5,7,8,9<br>2,13,14,15 ,11,16 | 9 P01835,P02780,P06760,P20646,P22273,P35280,Q5M8C6,Q62902,Q68G31                       |
| 2784 | 1,2,6,10,1 3,4,5,7,8,9<br>2,13,14,16 ,11,15 | 9 O54800;Q5DWV2,P01835,P06760,P14668,P20646,P35280,Q6IFW6,Q6IG02,Q6P6R2                |
| 2785 | 1,2,6,10,1 3,4,5,7,8,9<br>2,13,15,16 ,11,14 | 12 O70417,P01835,P06760,P07150,P08649,P08937,P20646,P35280,Q5QE79,Q63751,Q6B345,Q6P6R2 |
| 2786 | 1,2,6,10,1 3,4,5,7,8,9<br>2,14,15,16 ,11,13 | 4 P06760,P14668,P22273,P35280                                                          |
| 2787 | 1,2,6,10,1 3,4,5,7,8,9<br>3,14,15,16 ,11,12 | 7 P01835,P06760,P14668,P22273,P35280,P70709,Q68G31                                     |
| 2788 | 1,2,6,11,1 3,4,5,7,8,9<br>2,13,14,15 ,10,16 | 5 P01835,P20646,P20760,P70545,Q68G31                                                   |

|      |                          |                         |   |                                                         |
|------|--------------------------|-------------------------|---|---------------------------------------------------------|
| 2789 | 1,2,6,11,1<br>2,13,14,16 | 3,4,5,7,8,9<br>,10,15   | 6 | P01835,P20646,P35280,Q5RKI1,Q6P6R2,Q9Z0V6               |
| 2790 | 1,2,6,11,1<br>2,13,15,16 | 3,4,5,7,8,9<br>,10,14   | 8 | O70417,P01835,P06760,P08937,P20646,P20760,Q5QE79,Q63751 |
| 2791 | 1,2,6,11,1<br>2,14,15,16 | 3,4,5,7,8,9<br>,10,13   | 0 |                                                         |
| 2792 | 1,2,6,11,1<br>3,14,15,16 | 3,4,5,7,8,9<br>,10,12   | 3 | O70417,P01835,Q68G31                                    |
| 2793 | 1,2,6,12,1<br>3,14,15,16 | 3,4,5,7,8,9<br>,10,11   | 6 | P01835,P06760,P20646,P35280,Q6B345,Q6P6R2               |
| 2794 | 1,2,7,8,9,1<br>0,11,12   | 3,4,5,6,13,<br>14,15,16 | 1 | iRT-Kit_WR_fusion                                       |
| 2795 | 1,2,7,8,9,1<br>0,11,13   | 3,4,5,6,12,<br>14,15,16 | 2 | iRT-Kit_WR_fusion,Q66H69                                |
| 2796 | 1,2,7,8,9,1<br>0,11,14   | 3,4,5,6,12,<br>13,15,16 | 2 | Q812E4,Q9Z1F2                                           |
| 2797 | 1,2,7,8,9,1<br>0,11,15   | 3,4,5,6,12,<br>13,14,16 | 2 | iRT-Kit_WR_fusion,Q9Z1F2                                |
| 2798 | 1,2,7,8,9,1<br>0,11,16   | 3,4,5,6,12,<br>13,14,15 | 5 | iRT-Kit_WR_fusion,P08723,P09456,Q812E4,Q9JHB9           |
| 2799 | 1,2,7,8,9,1<br>0,12,13   | 3,4,5,6,11,<br>14,15,16 | 4 | iRT-Kit_WR_fusion,P29315,Q66H69,Q9Z1F2                  |
| 2800 | 1,2,7,8,9,1<br>0,12,14   | 3,4,5,6,11,<br>13,15,16 | 4 | iRT-Kit_WR_fusion,P21674,P29315,Q9Z1F2                  |
| 2801 | 1,2,7,8,9,1<br>0,12,15   | 3,4,5,6,11,<br>13,14,16 | 3 | iRT-Kit_WR_fusion,P35745,Q9Z1F2                         |
| 2802 | 1,2,7,8,9,1<br>0,12,16   | 3,4,5,6,11,<br>13,14,15 | 2 | iRT-Kit_WR_fusion,P21674                                |
| 2803 | 1,2,7,8,9,1<br>0,13,14   | 3,4,5,6,11,<br>12,15,16 | 2 | P29315,Q9Z1F2                                           |
| 2804 | 1,2,7,8,9,1<br>0,13,15   | 3,4,5,6,11,<br>12,14,16 | 2 | P35745,Q9Z1F2                                           |
| 2805 | 1,2,7,8,9,1<br>0,13,16   | 3,4,5,6,11,<br>12,14,15 | 0 |                                                         |
| 2806 | 1,2,7,8,9,1<br>0,14,15   | 3,4,5,6,11,<br>12,13,16 | 2 | P35745,Q9Z1F2                                           |
| 2807 | 1,2,7,8,9,1<br>0,14,16   | 3,4,5,6,11,<br>12,13,15 | 1 | P21674                                                  |
| 2808 | 1,2,7,8,9,1<br>0,15,16   | 3,4,5,6,11,<br>12,13,14 | 1 | iRT-Kit_WR_fusion                                       |

|      |                        |                         |                                                                             |
|------|------------------------|-------------------------|-----------------------------------------------------------------------------|
| 2809 | 1,2,7,8,9,1<br>1,12,13 | 3,4,5,6,10,<br>14,15,16 | 3 iRT-Kit_WR_fusion,Q66H69,Q812E4                                           |
| 2810 | 1,2,7,8,9,1<br>1,12,14 | 3,4,5,6,10,<br>13,15,16 | 4 iRT-Kit_WR_fusion,P11883,P21674,Q812E4                                    |
| 2811 | 1,2,7,8,9,1<br>1,12,15 | 3,4,5,6,10,<br>13,14,16 | 1 iRT-Kit_WR_fusion                                                         |
| 2812 | 1,2,7,8,9,1<br>1,12,16 | 3,4,5,6,10,<br>13,14,15 | 9 iRT-Kit_WR_fusion,P02782,P08723,P09456,P21674,P30120,P62804,Q812E4,Q9JHB9 |
| 2813 | 1,2,7,8,9,1<br>1,13,14 | 3,4,5,6,10,<br>12,15,16 | 3 iRT-Kit_WR_fusion,P0DMW0;P0DMW1,Q812E4                                    |
| 2814 | 1,2,7,8,9,1<br>1,13,15 | 3,4,5,6,10,<br>12,14,16 | 2 iRT-Kit_WR_fusion,P0DMW0;P0DMW1                                           |
| 2815 | 1,2,7,8,9,1<br>1,13,16 | 3,4,5,6,10,<br>12,14,15 | 7 iRT-Kit_WR_fusion,P02782,P08723,P09456,P30120,Q812E4,Q9JHB9               |
| 2816 | 1,2,7,8,9,1<br>1,14,15 | 3,4,5,6,10,<br>12,13,16 | 3 iRT-Kit_WR_fusion,P0DMW0;P0DMW1,Q812E4                                    |
| 2817 | 1,2,7,8,9,1<br>1,14,16 | 3,4,5,6,10,<br>12,13,15 | 6 iRT-Kit_WR_fusion,P08723,P09456,P30120,Q812E4,Q9JHB9                      |
| 2818 | 1,2,7,8,9,1<br>1,15,16 | 3,4,5,6,10,<br>12,13,14 | 6 iRT-Kit_WR_fusion,P08723,P09456,Q812E4,Q8CJ52,Q9JHB9                      |
| 2819 | 1,2,7,8,9,1<br>2,13,14 | 3,4,5,6,10,<br>11,15,16 | 2 iRT-Kit_WR_fusion,P29315                                                  |
| 2820 | 1,2,7,8,9,1<br>2,13,15 | 3,4,5,6,10,<br>11,14,16 | 2 iRT-Kit_WR_fusion,P35745                                                  |
| 2821 | 1,2,7,8,9,1<br>2,13,16 | 3,4,5,6,10,<br>11,14,15 | 1 iRT-Kit_WR_fusion                                                         |
| 2822 | 1,2,7,8,9,1<br>2,14,15 | 3,4,5,6,10,<br>11,13,16 | 2 iRT-Kit_WR_fusion,P35745                                                  |
| 2823 | 1,2,7,8,9,1<br>2,14,16 | 3,4,5,6,10,<br>11,13,15 | 2 iRT-Kit_WR_fusion,P21674                                                  |
| 2824 | 1,2,7,8,9,1<br>2,15,16 | 3,4,5,6,10,<br>11,13,14 | 1 iRT-Kit_WR_fusion                                                         |
| 2825 | 1,2,7,8,9,1<br>3,14,15 | 3,4,5,6,10,<br>11,12,16 | 1 P0DMW0;P0DMW1                                                             |
| 2826 | 1,2,7,8,9,1<br>3,14,16 | 3,4,5,6,10,<br>11,12,15 | 0                                                                           |
| 2827 | 1,2,7,8,9,1<br>3,15,16 | 3,4,5,6,10,<br>11,12,14 | 1 iRT-Kit_WR_fusion                                                         |
| 2828 | 1,2,7,8,9,1<br>4,15,16 | 3,4,5,6,10,<br>11,12,13 | 3 iRT-Kit_WR_fusion,P47967,P97840                                           |

|      |                                             |                                                                      |
|------|---------------------------------------------|----------------------------------------------------------------------|
| 2829 | 1,2,7,8,10, 3,4,5,6,9,1<br>11,12,13 4,15,16 | 3 iRT-Kit_WR_fusion,P23593,Q66H69                                    |
| 2830 | 1,2,7,8,10, 3,4,5,6,9,1<br>11,12,14 3,15,16 | 4 iRT-Kit_WR_fusion,P11883,P62804,Q66H69                             |
| 2831 | 1,2,7,8,10, 3,4,5,6,9,1<br>11,12,15 3,14,16 | 3 iRT-Kit_WR_fusion,Q66H69,Q9Z1F2                                    |
| 2832 | 1,2,7,8,10, 3,4,5,6,9,1<br>11,12,16 3,14,15 | 8 iRT-Kit_WR_fusion,P02782,P08723,P30120,P62804,Q00715,Q66H69,Q9JHB9 |
| 2833 | 1,2,7,8,10, 3,4,5,6,9,1<br>11,13,14 2,15,16 | 3 Q66H69,Q68G31,Q9Z1F2                                               |
| 2834 | 1,2,7,8,10, 3,4,5,6,9,1<br>11,13,15 2,14,16 | 3 Q66H69,Q68G31,Q9Z1F2                                               |
| 2835 | 1,2,7,8,10, 3,4,5,6,9,1<br>11,13,16 2,14,15 | 7 P02782,P08723,P09456,P24368,P30120,Q66H69,Q9JHB9                   |
| 2836 | 1,2,7,8,10, 3,4,5,6,9,1<br>11,14,15 2,13,16 | 1 Q9Z1F2                                                             |
| 2837 | 1,2,7,8,10, 3,4,5,6,9,1<br>11,14,16 2,13,15 | 5 P08723,P30120,P62804,Q00715,Q9JHB9                                 |
| 2838 | 1,2,7,8,10, 3,4,5,6,9,1<br>11,15,16 2,13,14 | 2 P08723,Q9JHB9                                                      |
| 2839 | 1,2,7,8,10, 3,4,5,6,9,1<br>12,13,14 1,15,16 | 3 P29315,Q66H69,Q9Z1F2                                               |
| 2840 | 1,2,7,8,10, 3,4,5,6,9,1<br>12,13,15 1,14,16 | 4 iRT-Kit_WR_fusion,Q63598,Q66H69,Q9Z1F2                             |
| 2841 | 1,2,7,8,10, 3,4,5,6,9,1<br>12,13,16 1,14,15 | 2 iRT-Kit_WR_fusion,Q66H69                                           |
| 2842 | 1,2,7,8,10, 3,4,5,6,9,1<br>12,14,15 1,13,16 | 2 iRT-Kit_WR_fusion,Q9Z1F2                                           |
| 2843 | 1,2,7,8,10, 3,4,5,6,9,1<br>12,14,16 1,13,15 | 2 iRT-Kit_WR_fusion,P21674                                           |
| 2844 | 1,2,7,8,10, 3,4,5,6,9,1<br>12,15,16 1,13,14 | 3 iRT-Kit_WR_fusion,Q63598,Q64093                                    |
| 2845 | 1,2,7,8,10, 3,4,5,6,9,1<br>13,14,15 1,12,16 | 1 Q9Z1F2                                                             |
| 2846 | 1,2,7,8,10, 3,4,5,6,9,1<br>13,14,16 1,12,15 | 0                                                                    |
| 2847 | 1,2,7,8,10, 3,4,5,6,9,1<br>13,15,16 1,12,14 | 3 P19468,Q63598,Q64093                                               |
| 2848 | 1,2,7,8,10, 3,4,5,6,9,1<br>14,15,16 1,12,13 | 0                                                                    |

|      |                                             |                                                                                                       |
|------|---------------------------------------------|-------------------------------------------------------------------------------------------------------|
| 2849 | 1,2,7,8,11, 3,4,5,6,9,1<br>12,13,14 0,15,16 | 4 iRT-Kit_WR_fusion,P11883,Q66H69,Q811M5                                                              |
| 2850 | 1,2,7,8,11, 3,4,5,6,9,1<br>12,13,15 0,14,16 | 3 iRT-Kit_WR_fusion,Q66H69,Q811M5                                                                     |
| 2851 | 1,2,7,8,11, 3,4,5,6,9,1<br>12,13,16 0,14,15 | 10 iRT-Kit_WR_fusion,P02782,P08723,P09456,P24368,P30120,Q00715,Q66H69,Q811M5,Q9JHB9                   |
| 2852 | 1,2,7,8,11, 3,4,5,6,9,1<br>12,14,15 0,13,16 | 3 iRT-Kit_WR_fusion,P11883,Q811M5                                                                     |
| 2853 | 1,2,7,8,11, 3,4,5,6,9,1<br>12,14,16 0,13,15 | iRT-<br>12 Kit_WR_fusion,P02782,P08723,P09456,P11883,P21674,P30120,P62804,Q00715,Q811M5,Q812E4,Q9JHB9 |
| 2854 | 1,2,7,8,11, 3,4,5,6,9,1<br>12,15,16 0,13,14 | 6 iRT-Kit_WR_fusion,P02782,P08723,P30120,Q00715,Q9JHB9                                                |
| 2855 | 1,2,7,8,11, 3,4,5,6,9,1<br>13,14,15 0,12,16 | 1 Q811M5                                                                                              |
| 2856 | 1,2,7,8,11, 3,4,5,6,9,1<br>13,14,16 0,12,15 | 7 P02782,P08723,P09456,P30120,Q811M5,Q812E4,Q9JHB9                                                    |
| 2857 | 1,2,7,8,11, 3,4,5,6,9,1<br>13,15,16 0,12,14 | 8 iRT-Kit_WR_fusion,P02782,P08723,P09456,P30120,Q66H69,Q8CJ52,Q9JHB9                                  |
| 2858 | 1,2,7,8,11, 3,4,5,6,9,1<br>14,15,16 0,12,13 | 4 P08723,P30120,Q8CJ52,Q9JHB9                                                                         |
| 2859 | 1,2,7,8,12, 3,4,5,6,9,1<br>13,14,15 0,11,16 | 3 iRT-Kit_WR_fusion,Q811M5,Q9Z2L0                                                                     |
| 2860 | 1,2,7,8,12, 3,4,5,6,9,1<br>13,14,16 0,11,15 | 2 iRT-Kit_WR_fusion,Q811M5                                                                            |
| 2861 | 1,2,7,8,12, 3,4,5,6,9,1<br>13,15,16 0,11,14 | 2 iRT-Kit_WR_fusion,Q66H69                                                                            |
| 2862 | 1,2,7,8,12, 3,4,5,6,9,1<br>14,15,16 0,11,13 | 1 iRT-Kit_WR_fusion                                                                                   |
| 2863 | 1,2,7,8,13, 3,4,5,6,9,1<br>14,15,16 0,11,12 | 0                                                                                                     |
| 2864 | 1,2,7,9,10, 3,4,5,6,8,1<br>11,12,13 4,15,16 | 1 Q62761;Q62762;Q62763                                                                                |
| 2865 | 1,2,7,9,10, 3,4,5,6,8,1<br>11,12,14 3,15,16 | 2 P00762,Q62761;Q62762;Q62763                                                                         |
| 2866 | 1,2,7,9,10, 3,4,5,6,8,1<br>11,12,15 3,14,16 | 3 P00762,Q62761;Q62762;Q62763,Q99MH3                                                                  |
| 2867 | 1,2,7,9,10, 3,4,5,6,8,1<br>11,12,16 3,14,15 | 1 D3ZUC6                                                                                              |
| 2868 | 1,2,7,9,10, 3,4,5,6,8,1<br>11,13,14 2,15,16 | 3 P00762,P0DMW0;P0DMW1,Q9R168                                                                         |

|      |                                             |                                                                                |
|------|---------------------------------------------|--------------------------------------------------------------------------------|
| 2869 | 1,2,7,9,10, 3,4,5,6,8,1<br>11,13,15 2,14,16 | 2 P00762,Q9R168                                                                |
| 2870 | 1,2,7,9,10, 3,4,5,6,8,1<br>11,13,16 2,14,15 | 2 D3ZUC6,Q9R168                                                                |
| 2871 | 1,2,7,9,10, 3,4,5,6,8,1<br>11,14,15 2,13,16 | 3 P00762,P0DMW0;P0DMW1,Q9R168                                                  |
| 2872 | 1,2,7,9,10, 3,4,5,6,8,1<br>11,14,16 2,13,15 | 1 Q9R168                                                                       |
| 2873 | 1,2,7,9,10, 3,4,5,6,8,1<br>11,15,16 2,13,14 | 2 D3ZUC6,Q9R168                                                                |
| 2874 | 1,2,7,9,10, 3,4,5,6,8,1<br>12,13,14 1,15,16 | 5 P00762,P29315,Q4FZU2,Q6IFW6,Q6IG02                                           |
| 2875 | 1,2,7,9,10, 3,4,5,6,8,1<br>12,13,15 1,14,16 | 2 P00762,Q99041                                                                |
| 2876 | 1,2,7,9,10, 3,4,5,6,8,1<br>12,13,16 1,14,15 | 3 D3ZUC6,Q6IFU7,Q6IG02                                                         |
| 2877 | 1,2,7,9,10, 3,4,5,6,8,1<br>12,14,15 1,13,16 | 4 P00762,P22273,Q62902,Q99041                                                  |
| 2878 | 1,2,7,9,10, 3,4,5,6,8,1<br>12,14,16 1,13,15 | 3 P21674,Q6IFU7,Q6IG02                                                         |
| 2879 | 1,2,7,9,10, 3,4,5,6,8,1<br>12,15,16 1,13,14 | 3 D3ZUC6,P08937,Q99041                                                         |
| 2880 | 1,2,7,9,10, 3,4,5,6,8,1<br>13,14,15 1,12,16 | 6 P00762,P01835,P02780,P22273,Q5M8C6,Q9R168                                    |
| 2881 | 1,2,7,9,10, 3,4,5,6,8,1<br>13,14,16 1,12,15 | 2 Q6IG02,Q9R168                                                                |
| 2882 | 1,2,7,9,10, 3,4,5,6,8,1<br>13,15,16 1,12,14 | 3 D3ZUC6,P08937,Q9R168                                                         |
| 2883 | 1,2,7,9,10, 3,4,5,6,8,1<br>14,15,16 1,12,13 | 4 P22273,P47967,Q5I0D1,Q9R168                                                  |
| 2884 | 1,2,7,9,11, 3,4,5,6,8,1<br>12,13,14 0,15,16 | 8 O35077,O70594,P0DMW0;P0DMW1,P25031,P53790,Q62761;Q62762;Q62763,Q63270,Q8R431 |
| 2885 | 1,2,7,9,11, 3,4,5,6,8,1<br>12,13,15 0,14,16 | 5 O35077,P08937,P20760,P25031,Q62761;Q62762;Q62763                             |
| 2886 | 1,2,7,9,11, 3,4,5,6,8,1<br>12,13,16 0,14,15 | 1 P54921                                                                       |
| 2887 | 1,2,7,9,11, 3,4,5,6,8,1<br>12,14,15 0,13,16 | 5 O35077,O70257,P0DMW0;P0DMW1,P25031,Q62761;Q62762;Q62763                      |
| 2888 | 1,2,7,9,11, 3,4,5,6,8,1<br>12,14,16 0,13,15 | 2 P21674,Q498D9                                                                |



|      |                                             |                               |
|------|---------------------------------------------|-------------------------------|
| 2889 | 1,2,7,9,11, 3,4,5,6,8,1<br>12,15,16 0,13,14 | 1 P08937                      |
| 2890 | 1,2,7,9,11, 3,4,5,6,8,1<br>13,14,15 0,12,16 | 3 P0DMW0;P0DMW1,P25031,Q9R168 |
| 2891 | 1,2,7,9,11, 3,4,5,6,8,1<br>13,14,16 0,12,15 | 2 P0DMW0;P0DMW1,Q9R168        |
| 2892 | 1,2,7,9,11, 3,4,5,6,8,1<br>13,15,16 0,12,14 | 4 O70417,P08937,P25031,Q9R168 |
| 2893 | 1,2,7,9,11, 3,4,5,6,8,1<br>14,15,16 0,12,13 | 3 P0DMW0;P0DMW1,P25031,Q9R168 |
| 2894 | 1,2,7,9,12, 3,4,5,6,8,1<br>13,14,15 0,11,16 | 3 P01835,P0DMW0;P0DMW1,P22273 |
| 2895 | 1,2,7,9,12, 3,4,5,6,8,1<br>13,14,16 0,11,15 | 3 P01835,Q6IFU7,Q6IG02        |
| 2896 | 1,2,7,9,12, 3,4,5,6,8,1<br>13,15,16 0,11,14 | 3 P01835,P08937,Q6B345        |
| 2897 | 1,2,7,9,12, 3,4,5,6,8,1<br>14,15,16 0,11,13 | 0                             |
| 2898 | 1,2,7,9,13, 3,4,5,6,8,1<br>14,15,16 0,11,12 | 3 P01835,P0DMW0;P0DMW1,Q9R168 |
| 2899 | 1,2,7,10,1 3,4,5,6,8,9<br>1,12,13,14 ,15,16 | 2 P20760,P23593               |
| 2900 | 1,2,7,10,1 3,4,5,6,8,9<br>1,12,13,15 ,14,16 | 2 P20760,P23593               |
| 2901 | 1,2,7,10,1 3,4,5,6,8,9<br>1,12,13,16 ,14,15 | 1 P20760                      |
| 2902 | 1,2,7,10,1 3,4,5,6,8,9<br>1,12,14,15 ,13,16 | 2 P20760,P23593               |
| 2903 | 1,2,7,10,1 3,4,5,6,8,9<br>1,12,14,16 ,13,15 | 1 P62804                      |
| 2904 | 1,2,7,10,1 3,4,5,6,8,9<br>1,12,15,16 ,13,14 | 2 P08937,P20760               |
| 2905 | 1,2,7,10,1 3,4,5,6,8,9<br>1,13,14,15 ,12,16 | 2 P01835,P20760               |
| 2906 | 1,2,7,10,1 3,4,5,6,8,9<br>1,13,14,16 ,12,15 | 2 P36376,Q9R168               |
| 2907 | 1,2,7,10,1 3,4,5,6,8,9<br>1,13,15,16 ,12,14 | 4 O70417,P08937,P20760,Q63751 |
| 2908 | 1,2,7,10,1 3,4,5,6,8,9<br>1,14,15,16 ,12,13 | 0                             |

|      |                                             |                                             |
|------|---------------------------------------------|---------------------------------------------|
| 2909 | 1,2,7,10,1 3,4,5,6,8,9<br>2,13,14,15 ,11,16 | 3 O88797,P01835,P20760                      |
| 2910 | 1,2,7,10,1 3,4,5,6,8,9<br>2,13,14,16 ,11,15 | 3 P01835,Q6IG02,Q6P6S4                      |
| 2911 | 1,2,7,10,1 3,4,5,6,8,9<br>2,13,15,16 ,11,14 | 3 P01835,P08937,Q63751                      |
| 2912 | 1,2,7,10,1 3,4,5,6,8,9<br>2,14,15,16 ,11,13 | 0                                           |
| 2913 | 1,2,7,10,1 3,4,5,6,8,9<br>3,14,15,16 ,11,12 | 4 O88797,P01835,P09527,P61206,P84079        |
| 2914 | 1,2,7,11,1 3,4,5,6,8,9<br>2,13,14,15 ,10,16 | 4 P01835,P20760,P25031,Q811M5               |
| 2915 | 1,2,7,11,1 3,4,5,6,8,9<br>2,13,14,16 ,10,15 | 2 P01835,Q811M5                             |
| 2916 | 1,2,7,11,1 3,4,5,6,8,9<br>2,13,15,16 ,10,14 | 6 O70417,P01835,P08937,P20760,P25031,Q63751 |
| 2917 | 1,2,7,11,1 3,4,5,6,8,9<br>2,14,15,16 ,10,13 | 1 P25031                                    |
| 2918 | 1,2,7,11,1 3,4,5,6,8,9<br>3,14,15,16 ,10,12 | 3 P01835,P25031,Q9R168                      |
| 2919 | 1,2,7,12,1 3,4,5,6,8,9<br>3,14,15,16 ,10,11 | 2 P01835,Q6B345                             |
| 2920 | 1,2,8,9,10, 3,4,5,6,7,1<br>11,12,13 4,15,16 | 2 B0LT89,P17988                             |
| 2921 | 1,2,8,9,10, 3,4,5,6,7,1<br>11,12,14 3,15,16 | 0                                           |
| 2922 | 1,2,8,9,10, 3,4,5,6,7,1<br>11,12,15 3,14,16 | 1 Q99MH3                                    |
| 2923 | 1,2,8,9,10, 3,4,5,6,7,1<br>11,12,16 3,14,15 | 2 D3ZUC6,P21674                             |
| 2924 | 1,2,8,9,10, 3,4,5,6,7,1<br>11,13,14 2,15,16 | 3 P0DMW0;P0DMW1,P17988,Q68G31               |
| 2925 | 1,2,8,9,10, 3,4,5,6,7,1<br>11,13,15 2,14,16 | 2 P07943,Q68G31                             |
| 2926 | 1,2,8,9,10, 3,4,5,6,7,1<br>11,13,16 2,14,15 | 1 D3ZUC6                                    |
| 2927 | 1,2,8,9,10, 3,4,5,6,7,1<br>11,14,15 2,13,16 | 3 P07943,P47967,P97840                      |
| 2928 | 1,2,8,9,10, 3,4,5,6,7,1<br>11,14,16 2,13,15 | 2 O89117,P97840                             |

|      |                                             |                                                                                                      |
|------|---------------------------------------------|------------------------------------------------------------------------------------------------------|
| 2929 | 1,2,8,9,10, 3,4,5,6,7,1<br>11,15,16 2,13,14 | 2 D3ZUC6,P07943                                                                                      |
| 2930 | 1,2,8,9,10, 3,4,5,6,7,1<br>12,13,14 1,15,16 | 1 P17988                                                                                             |
| 2931 | 1,2,8,9,10, 3,4,5,6,7,1<br>12,13,15 1,14,16 | 3 P11598,Q99041,Q99MH3                                                                               |
| 2932 | 1,2,8,9,10, 3,4,5,6,7,1<br>12,13,16 1,14,15 | 1 D3ZUC6                                                                                             |
| 2933 | 1,2,8,9,10, 3,4,5,6,7,1<br>12,14,15 1,13,16 | 5 P00714,P11598,P47967,P97840,Q99041                                                                 |
| 2934 | 1,2,8,9,10, 3,4,5,6,7,1<br>12,14,16 1,13,15 | 2 P21674,P97840                                                                                      |
| 2935 | 1,2,8,9,10, 3,4,5,6,7,1<br>12,15,16 1,13,14 | 1 Q99041                                                                                             |
| 2936 | 1,2,8,9,10, 3,4,5,6,7,1<br>13,14,15 1,12,16 | 2 P47967,P97840                                                                                      |
| 2937 | 1,2,8,9,10, 3,4,5,6,7,1<br>13,14,16 1,12,15 | 1 P97840                                                                                             |
| 2938 | 1,2,8,9,10, 3,4,5,6,7,1<br>13,15,16 1,12,14 | 1 D3ZUC6                                                                                             |
| 2939 | 1,2,8,9,10, 3,4,5,6,7,1<br>14,15,16 1,12,13 | 3 P47967,P97840,Q5I0D1                                                                               |
| 2940 | 1,2,8,9,11, 3,4,5,6,7,1<br>12,13,14 0,15,16 | 13 B0LT89,O35077,O70594,P0DMW0;P0DMW1,P17988,P18297,P19468,P53790,Q03248,Q5I0E9,Q63270,Q71MB6,Q8R431 |
| 2941 | 1,2,8,9,11, 3,4,5,6,7,1<br>12,13,15 0,14,16 | 4 B0LT89,P18297,P57113,Q71MB6                                                                        |
| 2942 | 1,2,8,9,11, 3,4,5,6,7,1<br>12,13,16 0,14,15 | 3 P30120,P54921,Q5RKI1                                                                               |
| 2943 | 1,2,8,9,11, 3,4,5,6,7,1<br>12,14,15 0,13,16 | 2 P18297,P97840                                                                                      |
| 2944 | 1,2,8,9,11, 3,4,5,6,7,1<br>12,14,16 0,13,15 | 3 P21674,Q5RKI1,Q812E4                                                                               |
| 2945 | 1,2,8,9,11, 3,4,5,6,7,1<br>12,15,16 0,13,14 | 1 Q5QE79                                                                                             |
| 2946 | 1,2,8,9,11, 3,4,5,6,7,1<br>13,14,15 0,12,16 | 2 P0DMW0;P0DMW1,P97840                                                                               |
| 2947 | 1,2,8,9,11, 3,4,5,6,7,1<br>13,14,16 0,12,15 | 4 P0DMW0;P0DMW1,P97840,Q5RKI1,Q812E4                                                                 |
| 2948 | 1,2,8,9,11, 3,4,5,6,7,1<br>13,15,16 0,12,14 | 1 Q5RLM2                                                                                             |

|      |                                             |                               |
|------|---------------------------------------------|-------------------------------|
| 2949 | 1,2,8,9,11, 3,4,5,6,7,1<br>14,15,16 0,12,13 | 3 P0DMW0;P0DMW1,P47967,P97840 |
| 2950 | 1,2,8,9,12, 3,4,5,6,7,1<br>13,14,15 0,11,16 | 2 P11598,P97840               |
| 2951 | 1,2,8,9,12, 3,4,5,6,7,1<br>13,14,16 0,11,15 | 1 Q5RKI1                      |
| 2952 | 1,2,8,9,12, 3,4,5,6,7,1<br>13,15,16 0,11,14 | 0                             |
| 2953 | 1,2,8,9,12, 3,4,5,6,7,1<br>14,15,16 0,11,13 | 2 P47967,P97840               |
| 2954 | 1,2,8,9,13, 3,4,5,6,7,1<br>14,15,16 0,11,12 | 3 P47967,P97840,Q5I0D1        |
| 2955 | 1,2,8,10,1 3,4,5,6,7,9<br>1,12,13,14 ,15,16 | 1 Q68G31                      |
| 2956 | 1,2,8,10,1 3,4,5,6,7,9<br>1,12,13,15 ,14,16 | 2 Q5QE79,Q68G31               |
| 2957 | 1,2,8,10,1 3,4,5,6,7,9<br>1,12,13,16 ,14,15 | 2 P30120,Q5QE79               |
| 2958 | 1,2,8,10,1 3,4,5,6,7,9<br>1,12,14,15 ,13,16 | 0                             |
| 2959 | 1,2,8,10,1 3,4,5,6,7,9<br>1,12,14,16 ,13,15 | 0                             |
| 2960 | 1,2,8,10,1 3,4,5,6,7,9<br>1,12,15,16 ,13,14 | 1 Q5QE79                      |
| 2961 | 1,2,8,10,1 3,4,5,6,7,9<br>1,13,14,15 ,12,16 | 1 Q68G31                      |
| 2962 | 1,2,8,10,1 3,4,5,6,7,9<br>1,13,14,16 ,12,15 | 1 Q68G31                      |
| 2963 | 1,2,8,10,1 3,4,5,6,7,9<br>1,13,15,16 ,12,14 | 3 Q5QE79,Q63751,Q68G31        |
| 2964 | 1,2,8,10,1 3,4,5,6,7,9<br>1,14,15,16 ,12,13 | 0                             |
| 2965 | 1,2,8,10,1 3,4,5,6,7,9<br>2,13,14,15 ,11,16 | 0                             |
| 2966 | 1,2,8,10,1 3,4,5,6,7,9<br>2,13,14,16 ,11,15 | 0                             |
| 2967 | 1,2,8,10,1 3,4,5,6,7,9<br>2,13,15,16 ,11,14 | 2 Q5QE79,Q63751               |
| 2968 | 1,2,8,10,1 3,4,5,6,7,9<br>2,14,15,16 ,11,13 | 1 Q63617                      |

|      |                                             |                                                                                                                                                                                                                                                   |
|------|---------------------------------------------|---------------------------------------------------------------------------------------------------------------------------------------------------------------------------------------------------------------------------------------------------|
| 2969 | 1,2,8,10,1 3,4,5,6,7,9<br>3,14,15,16 ,11,12 | 0                                                                                                                                                                                                                                                 |
| 2970 | 1,2,8,11,1 3,4,5,6,7,9<br>2,13,14,15 ,10,16 | 1 Q811M5                                                                                                                                                                                                                                          |
| 2971 | 1,2,8,11,1 3,4,5,6,7,9<br>2,13,14,16 ,10,15 | 3 P30120,Q5RKI1,Q811M5                                                                                                                                                                                                                            |
| 2972 | 1,2,8,11,1 3,4,5,6,7,9<br>2,13,15,16 ,10,14 | 3 P30120,Q5QE79,Q63751                                                                                                                                                                                                                            |
| 2973 | 1,2,8,11,1 3,4,5,6,7,9<br>2,14,15,16 ,10,13 | 0                                                                                                                                                                                                                                                 |
| 2974 | 1,2,8,11,1 3,4,5,6,7,9<br>3,14,15,16 ,10,12 | 0                                                                                                                                                                                                                                                 |
| 2975 | 1,2,8,12,1 3,4,5,6,7,9<br>3,14,15,16 ,10,11 | 0                                                                                                                                                                                                                                                 |
| 2976 | 1,2,9,10,1 3,4,5,6,7,8<br>1,12,13,14 ,15,16 | 18 B0LT89,O35077,O70594,P06761,P17988,P20760,P20761,P46844,P48508,P50115,P53790,Q0324<br>8,Q5M7T9,Q62761;Q62762;Q62763,Q63270,Q6TMA8,Q8R431,Q9QX74                                                                                                |
| 2977 | 1,2,9,10,1 3,4,5,6,7,8<br>1,12,13,15 ,14,16 | 16 B0LT89,O35077,O70417,P06761,P08937,P20760,P20761,P50115,Q5M8C6,Q5QE79,Q62761;Q6<br>2762;Q62763,Q63751,Q6TMA8,Q99MH3,Q9QX74,Q9WUW8                                                                                                              |
| 2978 | 1,2,9,10,1 3,4,5,6,7,8<br>1,12,13,16 ,14,15 | 12 B0LT89,D3ZUC6,O70417,P08937,P20760,P20761,P50115,P54921,Q5QE79,Q62714,Q63751,Q9<br>QX74                                                                                                                                                        |
| 2979 | 1,2,9,10,1 3,4,5,6,7,8<br>1,12,14,15 ,13,16 | 16 O35077,O70257,O70594,P06761,P20760,P20761,P46844,P50115,Q5I0D7,Q5M8C6,Q62761;Q6<br>2762;Q62763,Q62902,Q6TMA8,Q9QX74,Q9R0T3,Q9WUW8                                                                                                              |
| 2980 | 1,2,9,10,1 3,4,5,6,7,8<br>1,12,14,16 ,13,15 | 4 O70594,P20761,P50115,Q9QX74                                                                                                                                                                                                                     |
| 2981 | 1,2,9,10,1 3,4,5,6,7,8<br>1,12,15,16 ,13,14 | 12 D3ZUC6,O70417,P06761,P08937,P20760,P20761,P50115,P63081,Q5QE79,Q63751,Q9QX74,Q9<br>WUW8                                                                                                                                                        |
| 2982 | 1,2,9,10,1 3,4,5,6,7,8<br>1,13,14,15 ,12,16 | 13 O70417,P06761,P0DMW0;P0DMW1,P20760,P20761,P26772,P46844,P50115,P97840,Q5M8C6,<br>Q6TMA8,Q9QX74,Q9R0T3                                                                                                                                          |
| 2983 | 1,2,9,10,1 3,4,5,6,7,8<br>1,13,14,16 ,12,15 | 6 D3ZUC6,O89117,P50115,Q63270,Q9QX74,Q9R168                                                                                                                                                                                                       |
| 2984 | 1,2,9,10,1 3,4,5,6,7,8<br>1,13,15,16 ,12,14 | 8 D3ZUC6,O70417,P08937,P50115,Q5QE79,Q5RLM2,Q63751,Q9QX74                                                                                                                                                                                         |
| 2985 | 1,2,9,10,1 3,4,5,6,7,8<br>1,14,15,16 ,12,13 | 9 D3ZUC6,P06761,P08937,P47967,P50115,P97840,Q5QE79,Q9QX74,Q9R0T3                                                                                                                                                                                  |
| 2986 | 1,2,9,10,1 3,4,5,6,7,8<br>2,13,14,15 ,11,16 | 33 P00762,P02780,P02781,P02782,P06760,P06761,P07150,P07647,P08010,P08723,P08937,P09456<br>,P0C0A9,P11598,P20760,P20761,P22273,P22282,P22283,P30120,P46462,P50115,Q4G063,Q4G0<br>75,Q5M8C6,Q62902,Q63493,Q63617,Q6B345,Q6TMA8,Q99041,Q9QX74,Q9R0T3 |
| 2987 | 1,2,9,10,1 3,4,5,6,7,8<br>2,13,14,16 ,11,15 | 17 P02780,P06760,P06761,P07150,P22273,P22282,P50115,Q4FZU2,Q4G063,Q4G075,Q5M8C6,Q6<br>3617,Q6IFW6,Q6IG02,Q99041,Q9QX74,Q9R0T3                                                                                                                     |
| 2988 | 1,2,9,10,1 3,4,5,6,7,8<br>2,13,15,16 ,11,14 | 22 D3ZUC6,O70417,P02780,P06760,P06761,P07150,P08937,P11598,P20761,P22273,P22282,P4646<br>2,P50115,Q4G075,Q5M8C6,Q5QE79,Q63617,Q63751,Q6B345,Q99041,Q9QX74,Q9R0T3                                                                                  |

|      |                               |                       |    |                                                                                                                                                                                                                                                                                                                                                               |
|------|-------------------------------|-----------------------|----|---------------------------------------------------------------------------------------------------------------------------------------------------------------------------------------------------------------------------------------------------------------------------------------------------------------------------------------------------------------|
| 2989 | 1,2,9,10,1<br>2,14,15,16      | 3,4,5,6,7,8<br>,11,13 | 22 | P02780,P06760,P06761,P08937,P11598,P22273,P22282,P22283,P46462,P47967,P50115,P97840,Q4G063,Q4G075,Q5M8C6,Q5QE79,Q62902,Q63493,Q63617,Q99041,Q9QX74,Q9R0T3                                                                                                                                                                                                     |
| 2990 | 1,2,9,10,1<br>3,14,15,16      | 3,4,5,6,7,8<br>,11,12 | 23 | O70417,P02780,P06760,P06761,P07150,P08937,P11598,P22273,P22282,P22283,P46462,P47967,P50115,P70709,P97840,Q4G075,Q5I0D1,Q5M8C6,Q63493,Q63617,Q99041,Q9QX74,Q9R0T3                                                                                                                                                                                              |
| 2991 | 1,2,9,11,1<br>2,13,14,15      | 3,4,5,6,7,8<br>,10,16 | 47 | B0LT89,O35077,O70257,O70377,O70417,O70594,P06761,P07151,P08937,P0DMW0,P0DMW1,P18757,P19468,P20760,P20761,P25031,P28570,P46844,P48508,P50115,P53790,P57113,Q03248,Q05175,Q3T1J9,Q3ZAV1,Q5I0E9,Q5M7T9,Q62761;Q62762;Q62763,Q63270,Q63424,Q63618,Q64602,Q68FT5,Q6MG61,Q6Q0N1,Q6TMA8,Q71MB6,Q80W57,Q8R431,Q923S2,Q9JJ40,Q9QX74,Q9R0T3,Q9WTW7,Q9WUW8,Q9WUW9,Q9Z0W7 |
| 2992 | 1,2,9,11,1<br>2,13,14,16      | 3,4,5,6,7,8<br>,10,15 | 32 | O35763,O70257,O70377,O70594,O88339;Q4V882,P08937,P19468,P20761,P30904,P38918,P46844,P48508,P50115,P53790,P54921,P57113,Q03248,Q05175,Q3MIE4,Q3ZAV1,Q5I0E9,Q5M7T9,Q5RKI1,Q63270,Q63424,Q63618,Q6MG61,Q6Q0N1,Q8R431,Q923S2,Q9QX74,Q9Z0W7                                                                                                                        |
| 2993 | 1,2,9,11,1<br>2,13,15,16      | 3,4,5,6,7,8<br>,10,14 | 17 | D3ZUC6,O70417,O70594,P08937,P20760,P20761,P25031,P48508,P50115,P54921,P57113,Q5QE79,Q5RLM2,Q63751,Q923S2,Q9QX74,Q9WUW8                                                                                                                                                                                                                                        |
| 2994 | 1,2,9,11,1<br>2,14,15,16      | 3,4,5,6,7,8<br>,10,13 | 20 | O70257,O70594,P06761,P07171,P08937,P20761,P25031,P30904,P36860,P46844,P48508,P50115,P57113,Q5QE79,Q63618,Q6MG61,Q8R431,Q9QX74,Q9R0T3,Q9WUW8                                                                                                                                                                                                                   |
| 2995 | 1,2,9,11,1<br>3,14,15,16      | 3,4,5,6,7,8<br>,10,12 | 17 | O70417,P08937,P0DMW0;P0DMW1,P25031,P26772,P30904,P46844,P48508,P50115,P97840,Q5QE79,Q5RLM2,Q63270,Q6MG61,Q9QX74,Q9R0T3,Q9R168                                                                                                                                                                                                                                 |
| 2996 | 1,2,9,12,1<br>3,14,15,16      | 3,4,5,6,7,8<br>,10,11 | 22 | O70417,P02780,P06760,P06761,P07150,P08937,P11598,P22273,P22282,P30904,P50115,P50116,Q4G063,Q4G075,Q5M8C6,Q5QE79,Q63617,Q6B345,Q6P6R2,Q99041,Q9QX74,Q9R0T3                                                                                                                                                                                                     |
| 2997 | 1,2,10,11,<br>12,13,14,1<br>5 | 3,4,5,6,7,8<br>,9,16  | 12 | O70417,P06760,P06761,P08937,P20646,P20760,P20761,P26772,P50115,Q5QE79,Q9QX74,Q9R0T3                                                                                                                                                                                                                                                                           |
| 2998 | 1,2,10,11,<br>12,13,14,1<br>6 | 3,4,5,6,7,8<br>,9,15  | 10 | P06760,P20646,P20760,P20761,P35280,P50115,Q5QE79,Q6P6R2,Q9QX74,Q9Z0V6                                                                                                                                                                                                                                                                                         |
| 2999 | 1,2,10,11,<br>12,13,15,1<br>6 | 3,4,5,6,7,8<br>,9,14  | 11 | O70417,P06760,P08937,P20646,P20760,P20761,P50115,Q5QE79,Q63751,Q6P6R2,Q9QX74                                                                                                                                                                                                                                                                                  |
| 3000 | 1,2,10,11,<br>12,14,15,1<br>6 | 3,4,5,6,7,8<br>,9,13  | 7  | P06760,P08937,P20760,P50115,Q5QE79,Q9QX74,Q9R0T3                                                                                                                                                                                                                                                                                                              |
| 3001 | 1,2,10,11,<br>13,14,15,1<br>6 | 3,4,5,6,7,8<br>,9,12  | 9  | O70417,P06760,P08937,P20760,P26772,P50115,Q5QE79,Q9QX74,Q9R0T3                                                                                                                                                                                                                                                                                                |
| 3002 | 1,2,10,12,<br>13,14,15,1<br>6 | 3,4,5,6,7,8<br>,9,11  | 21 | P02780,P06760,P06761,P07150,P08937,P20760,P22273,P22282,P35280,P50115,P50116,Q4G075,Q5M8C6,Q5QE79,Q62902,Q63493,Q63617,Q6B345,Q6P6R2,Q9QX74,Q9R0T3                                                                                                                                                                                                            |
| 3003 | 1,2,11,12,<br>13,14,15,1<br>6 | 3,4,5,6,7,8<br>,9,10  | 16 | O70417,O70594,P06760,P08937,P20646,P20760,P20761,P25031,P26772,P50115,P50116,P70545,Q5QE79,Q6P6R2,Q9QX74,Q9R0T3                                                                                                                                                                                                                                               |

|      |                      |                                |                                                                                                                                                                                                                                                                                                                                                                                                                                                                                                                                                                                                                                                                                               |
|------|----------------------|--------------------------------|-----------------------------------------------------------------------------------------------------------------------------------------------------------------------------------------------------------------------------------------------------------------------------------------------------------------------------------------------------------------------------------------------------------------------------------------------------------------------------------------------------------------------------------------------------------------------------------------------------------------------------------------------------------------------------------------------|
| 3004 | 1,3,4,5,6,7<br>,8,9  | 2,10,11,12<br>,13,14,15,<br>16 | D3ZHA0,O70417,O70594,P01681,P06760,P06761,P06911,P08649,P08721,P08937,P13432,P18427<br>18,P20646,P20760,P20761,P36860,P50115,P50116,Q05702,Q5QE79,Q62946,Q63751,Q6P6R2,<br>Q6TMA8,Q9QX74,Q9R0T3,Q9Z0V6                                                                                                                                                                                                                                                                                                                                                                                                                                                                                        |
| 3005 | 1,3,4,5,6,7<br>,8,10 | 2,9,11,12,<br>13,14,15,1<br>6  | 41<br>87<br>A2RUW1,D3ZHA0,O08557,O35763,O70257,O70377,O70417,O70594,O88339;Q4V882,P01681,<br>P01836,P04904,P06761,P06911,P08721,P08937,P10760,P13432,P18418,P18757,P19468,P19629<br>,P20646,P20760,P20761,P22282,P23928,P24268,P25031,P29975,P30904,P31044,P36860,P3891<br>8,P46720,P46844,P48037,P48508,P50115,P50116,P51907,P53790,P54921,P57113,P60711;P632<br>59,P63081,P68035;P68136,P97840,Q03248,Q05175,Q05702,Q3T1J9,Q3ZAV1,Q5I0E9,Q5M7T9,<br>Q5QE79,Q5RLM2,Q62946,Q63270,Q63424,Q63618,Q63751,Q64093,Q64602,Q66HG3,Q68FT5,<br>Q6AY41,Q6AYS7,Q6MG61,Q6P6R2,Q6Q0N1,Q6TMA8,Q71MB6,Q80W57,Q8R431,Q923S2,Q99<br>MZ8,Q9JJ19,Q9JJ40,Q9JLJ3,Q9QX74,Q9QYU4,Q9R0T3,Q9WTW7,Q9WUW8,Q9WUW9,Q9Z0W7 |
| 3006 | 1,3,4,5,6,7<br>,8,11 | 2,9,10,12,<br>13,14,15,1<br>6  | 67<br>B1H234,O35547,P01681,P02780,P02781,P02782,P04905,P06760,P06761,P06911,P07150,P0764<br>7,P08010,P08649,P08721,P08723,P08937,P09456,P0C0A9,P11598,P13432,P18418,P20646,P207<br>60,P20761,P22273,P22282,P22283,P31430,P36374,P40241,P46462,P47967,P50115,P50116,P50<br>280,P97840,Q05702,Q4FZU2,Q4G063,Q4G075,Q5GRG2,Q5M8C6,Q5QE79,Q62902,Q62946,Q6<br>3493,Q63617,Q63751,Q6B345,Q6IFU7,Q6IFU8,Q6IFW6,Q6IG02,Q6IMF3,Q6P6Q2,Q6P6R2,Q6Q<br>0N0,Q6TMA8,Q99041,Q9JHB9,Q9JI85,Q9QW07,Q9QX74,Q9QZK8,Q9R0T3,Q9WTT6                                                                                                                                                                                |
| 3007 | 1,3,4,5,6,7<br>,8,12 | 2,9,10,11,<br>13,14,15,1<br>6  | 32<br>D3ZHA0,O70417,P01681,P06761,P06911,P08937,P13432,P18418,P20760,P20761,P22282,P3090<br>4,P36860,P46844,P47967,P48508,P50115,P97840,Q05702,Q5M8C6,Q5QE79,Q5RLM2,Q62946,<br>Q63270,Q63751,Q66HG3,Q6MG61,Q6Q0N1,Q6TMA8,Q9JI85,Q9QX74,Q9R0T3                                                                                                                                                                                                                                                                                                                                                                                                                                                 |
| 3008 | 1,3,4,5,6,7<br>,8,13 | 2,9,10,11,<br>12,14,15,1<br>6  | 36<br>D3ZHA0,O70257,O70594,P01681,P02781,P06761,P06911,P08721,P08937,P13432,P18418,P206<br>46,P20760,P20761,P22282,P30904,P36860,P46844,P47967,P48508,P50115,P57113,P63081,P97<br>840,Q5M8C6,Q5QE79,Q62714,Q62902,Q62946,Q63618,Q6Q0N1,Q6TMA8,Q9JI85,Q9QX74,Q9<br>R0T3,Q9WUW8                                                                                                                                                                                                                                                                                                                                                                                                                 |
| 3009 | 1,3,4,5,6,7<br>,8,14 | 2,9,10,11,<br>12,13,15,1<br>6  | 37<br>D3ZHA0,D3ZUC6,O70417,O70594,P01681,P06760,P06761,P06911,P08649,P08937,P13432,P18<br>418,P20646,P20760,P20761,P46844,P48508,P50115,P52590,P54921,P57113,P63081,Q4G075,Q<br>5M8C6,Q5QE79,Q5RLM2,Q62714,Q62812,Q62946,Q63751,Q64602,Q6TMA8,Q923S2,Q9QX74,<br>Q9R0T3,Q9WUW8,Q9WUW9                                                                                                                                                                                                                                                                                                                                                                                                          |
| 3010 | 1,3,4,5,6,7<br>,8,15 | 2,9,10,11,<br>12,13,14,1<br>6  | 54<br>O08557,O35763,O70594,O88339;Q4V882,P01681,P01946,P02091,P06761,P06911,P08649,P087<br>21,P08937,P09606,P13432,P17988,P18418,P18757,P19468,P19629,P20646,P20760,P20761,P23<br>928,P30904,P36860,P38918,P46844,P48508,P50115,P53790,P54921,P57113,Q03248,Q05175,Q<br>05702,Q5I0E9,Q5M7T9,Q62714,Q62946,Q63270,Q63618,Q64602,Q6AYS7,Q6MG61,Q6PCU2,Q<br>6Q0N1,Q6TMA8,Q8R431,Q923S2,Q99MZ8,Q9QX74,Q9R0T3,Q9Z0V6,Q9Z0W7                                                                                                                                                                                                                                                                        |
| 3011 | 1,3,4,5,6,7<br>,8,16 | 2,9,10,11,<br>12,13,14,1<br>5  | 72<br>D3ZHA0,O35077,O35763,O70257,O70594,P01681,P02780,P02781,P02782,P02783,P04904,P06<br>761,P06911,P07151,P07647,P08649,P08721,P08937,P13432,P18418,P18757,P19468,P19629,P2<br>0646,P20760,P20761,P22282,P22283,P23928,P38918,P46720,P46844,P48508,P50115,P52590,P<br>52847,P53790,P57113,P63081,Q03248,Q05175,Q05702,Q3ZAV1,Q5I0D7,Q5I0E9,Q5M7T9,Q5M<br>8C6,Q5RLM2,Q62812,Q62902,Q62946,Q63270,Q63424,Q64602,Q68FT5,Q6MG61,Q6Q0N1,Q6<br>TMA8,Q71MB6,Q80W57,Q8R431,Q923S2,Q9JHB9,Q9JI85,Q9JJ40,Q9JLJ3,Q9QX74,Q9R0T3,Q9<br>WTW7,Q9WUW8,Q9WUW9,Q9Z0W7                                                                                                                                         |

|      |                       |                               |    |                                                                                                                                                                                                                                                                                                |
|------|-----------------------|-------------------------------|----|------------------------------------------------------------------------------------------------------------------------------------------------------------------------------------------------------------------------------------------------------------------------------------------------|
| 3012 | 1,3,4,5,6,7<br>,9,10  | 2,8,11,12,<br>13,14,15,1<br>6 | 4  | O70594,P08721,P23928,P36860                                                                                                                                                                                                                                                                    |
| 3013 | 1,3,4,5,6,7<br>,9,11  | 2,8,10,12,<br>13,14,15,1<br>6 | 8  | B1H234,P08649,P08721,P11598,P22283,Q63493,Q63617,Q9R0T3                                                                                                                                                                                                                                        |
| 3014 | 1,3,4,5,6,7<br>,9,12  | 2,8,10,11,<br>13,14,15,1<br>6 | 1  | P36860                                                                                                                                                                                                                                                                                         |
| 3015 | 1,3,4,5,6,7<br>,9,13  | 2,8,10,11,<br>12,14,15,1<br>6 | 2  | P36860,Q5QE79                                                                                                                                                                                                                                                                                  |
| 3016 | 1,3,4,5,6,7<br>,9,14  | 2,8,10,11,<br>12,13,15,1<br>6 | 3  | P52590,Q5QE79,Q63751                                                                                                                                                                                                                                                                           |
| 3017 | 1,3,4,5,6,7<br>,9,15  | 2,8,10,11,<br>12,13,14,1<br>6 | 6  | P01681,P01946,P02091,P08721,P36860,P62804                                                                                                                                                                                                                                                      |
| 3018 | 1,3,4,5,6,7<br>,9,16  | 2,8,10,11,<br>12,13,14,1<br>5 | 3  | P02783,P08721,P22006                                                                                                                                                                                                                                                                           |
| 3019 | 1,3,4,5,6,7<br>,10,11 | 2,8,9,12,1<br>3,14,15,16      | 9  | B1H234,P08721,P11598,P22283,P36860,P47967,P97840,Q63493,Q9R0T3                                                                                                                                                                                                                                 |
| 3020 | 1,3,4,5,6,7<br>,10,12 | 2,8,9,11,1<br>3,14,15,16      | 14 | P08721,P0DMW0,P0DMW1,P30904,P36860,P46844,P47967,P48508,P57113,P97840,Q03248,Q5RLM2,Q63270,Q66HG3,Q9R0T3                                                                                                                                                                                       |
| 3021 | 1,3,4,5,6,7<br>,10,13 | 2,8,9,11,1<br>2,14,15,16      | 12 | A2RUW1,O70594,P08721,P19468,P36860,P46844,P47967,P48508,P57113,P97840,Q63618,Q9WUW8                                                                                                                                                                                                            |
| 3022 | 1,3,4,5,6,7<br>,10,14 | 2,8,9,11,1<br>2,13,15,16      | 15 | A2RUW1,O70594,P08721,P23928,P46844,P48037,P48508,P54921,P57113,Q5QE79,Q5RLM2,Q63751,Q71MB6,Q923S2,Q9WUW8                                                                                                                                                                                       |
| 3023 | 1,3,4,5,6,7<br>,10,15 | 2,8,9,11,1<br>2,13,14,16      | 37 | A2RUW1,O08557,O70594,O88339;Q4V882,P01946,P02091,P08721,P17988,P18297,P19468,P23928,P30904,P36860,P38918,P46844,P48508,P53790,P54921,P57113,P62804,P97840,Q03248,Q05175,Q5I0E9,Q5RKI1,Q63270,Q63424,Q63618,Q6MG61,Q6Q0N1,Q71MB6,Q80W57,Q8K3P7,Q8R431,Q923S2,Q99MZ8,Q9Z0W7                      |
| 3024 | 1,3,4,5,6,7<br>,10,16 | 2,8,9,11,1<br>2,13,14,15      | 41 | O35077,O70594,P02783,P07647,P08721,P17988,P18297,P18757,P19468,P23928,P29975,P46844,P48037,P48508,P52847,P53790,P57113,P97840,Q03248,Q3ZAV1,Q5I0D7,Q5I0E9,Q5M7T9,Q63270,Q63424,Q63618,Q64602,Q68FT5,Q6MG61,Q6Q0N1,Q71MB6,Q80W57,Q8R431,Q923S2,Q9JJ40,Q9QYU4,Q9R0T3,Q9WTW7,Q9WUW8,Q9WUW9,Q9Z0W7 |
| 3025 | 1,3,4,5,6,7<br>,11,12 | 2,8,9,10,1<br>3,14,15,16      | 10 | P08721,P11598,P22283,P35053,P47967,P97840,Q5I0D1,Q63493,Q63617,Q9R0T3                                                                                                                                                                                                                          |
| 3026 | 1,3,4,5,6,7<br>,11,13 | 2,8,9,10,1<br>2,14,15,16      | 11 | B1H234,P08721,P11598,P22283,P36860,P47967,P97840,Q5I0D1,Q63493,Q63617,Q9R0T3                                                                                                                                                                                                                   |



|      |                       |                           |    |                                                                                                                                                                  |
|------|-----------------------|---------------------------|----|------------------------------------------------------------------------------------------------------------------------------------------------------------------|
| 3027 | 1,3,4,5,6,7<br>,11,14 | 2,8,9,10,1<br>2,13,15,16  | 11 | B1H234,P08649,P08721,P11598,P22283,P52590,Q4KLZ6,Q63493,Q63751,Q99041,Q9R0T3                                                                                     |
| 3028 | 1,3,4,5,6,7<br>,11,15 | 2,8,9,10,1<br>2,13,14,16  | 16 | B1H234,P01946,P02091,P08649,P08721,P11598,P17988,P22283,P97840,Q4FZU2,Q63493,Q6IFW6,Q6IG02,Q6IMF3,Q6P6Q2,Q8CJ52                                                  |
| 3029 | 1,3,4,5,6,7<br>,11,16 | 2,8,9,10,1<br>2,13,14,15  | 23 | B1H234,O35547,P02780,P02781,P02782,P02783,P07647,P08649,P08721,P08723,P0C0A9,P11598,P17988,P22283,P36374,P97840,Q08463,Q4KLZ6,Q63493,Q63617,Q8R5M3,Q9JHB9,Q9R0T3 |
| 3030 | 1,3,4,5,6,7<br>,12,13 | 2,8,9,10,1<br>1,14,15,16  | 3  | P36860,P47967,P97840                                                                                                                                             |
| 3031 | 1,3,4,5,6,7<br>,12,14 | 2,8,9,10,1<br>1,13,15,16  | 3  | P52590,Q5RLM2,Q63751                                                                                                                                             |
| 3032 | 1,3,4,5,6,7<br>,12,15 | 2,8,9,10,1<br>1,13,14,16  | 6  | O89117,P01946,P02091,P08721,P36860,P97840                                                                                                                        |
| 3033 | 1,3,4,5,6,7<br>,12,16 | 2,8,9,10,1<br>1,13,14,15  | 8  | P02783,P07647,P08721,P46844,P47967,P97840,Q5I0D7,Q9R0T3                                                                                                          |
| 3034 | 1,3,4,5,6,7<br>,13,14 | 2,8,9,10,1<br>1,12,15,16  | 8  | A2RUW1,B1H234,P52590,P63081,Q5QE79,Q62714,Q63751,Q9WUW8                                                                                                          |
| 3035 | 1,3,4,5,6,7<br>,13,15 | 2,8,9,10,1<br>1,12,14,16  | 8  | A2RUW1,P01946,P02091,P08721,P36860,P62804,P97840,Q62714                                                                                                          |
| 3036 | 1,3,4,5,6,7<br>,13,16 | 2,8,9,10,1<br>1,12,14,15  | 7  | P02783,P07647,P08721,P46844,P97840,Q5I0D7,Q9WUW8                                                                                                                 |
| 3037 | 1,3,4,5,6,7<br>,14,15 | 2,8,9,10,1<br>1,12,13,16  | 6  | A2RUW1,P01946,P02091,P08721,P54921,Q62714                                                                                                                        |
| 3038 | 1,3,4,5,6,7<br>,14,16 | 2,8,9,10,1<br>1,12,13,15  | 10 | P02783,P07647,P46844,P48037,P52590,P57113,Q5I0D7,Q71MB6,Q99MH3,Q9WUW8                                                                                            |
| 3039 | 1,3,4,5,6,7<br>,15,16 | 2,8,9,10,1<br>1,12,13,14  | 17 | O70594,P01946,P02091,P02783,P08721,P17988,P18297,P19468,P46844,P48508,P57113,Q03248,Q5I0D7,Q63270,Q6Q0N1,Q71MB6,Q8R431                                           |
| 3040 | 1,3,4,5,6,8<br>,9,10  | 2,7,11,12,<br>13,14,15,16 | 9  | O70594,P01681,P08937,P18418,P20760,P25031,P36860,P70545,Q05702                                                                                                   |
| 3041 | 1,3,4,5,6,8<br>,9,11  | 2,7,10,12,<br>13,14,15,16 | 11 | O88797,P01681,P08937,P20760,Q05702,Q4FZU2,Q63493,Q6IMF3,Q6P6Q2,Q6P6S4,Q9JI85                                                                                     |
| 3042 | 1,3,4,5,6,8<br>,9,12  | 2,7,10,11,<br>13,14,15,16 | 4  | P01681,P08937,P20760,Q05702                                                                                                                                      |
| 3043 | 1,3,4,5,6,8<br>,9,13  | 2,7,10,11,<br>12,14,15,16 | 5  | P01681,P08937,P20760,P62804,Q05702                                                                                                                               |
| 3044 | 1,3,4,5,6,8<br>,9,14  | 2,7,10,11,<br>12,13,15,16 | 7  | O70417,P01681,P08937,P20760,P52590,Q09030,Q63751                                                                                                                 |

|      |                       |                               |    |                                                                                                                                                                                                                                                                         |
|------|-----------------------|-------------------------------|----|-------------------------------------------------------------------------------------------------------------------------------------------------------------------------------------------------------------------------------------------------------------------------|
| 3045 | 1,3,4,5,6,8<br>,9,15  | 2,7,10,11,<br>12,13,14,1<br>6 | 7  | P01681,P01946,P02091,P13432,P20760,P62804,Q05702                                                                                                                                                                                                                        |
| 3046 | 1,3,4,5,6,8<br>,9,16  | 2,7,10,11,<br>12,13,14,1<br>5 | 8  | P01681,P02783,P18418,P20760,P22006,P23593,Q05702,Q09030                                                                                                                                                                                                                 |
| 3047 | 1,3,4,5,6,8<br>,10,11 | 2,7,9,12,1<br>3,14,15,16      | 12 | P01681,P08937,P18418,P25031,Q4FZU2,Q63493,Q6IFU7,Q6IFW6,Q6IG02,Q6IMF3,Q6P6Q2,Q9J<br>I85                                                                                                                                                                                 |
| 3048 | 1,3,4,5,6,8<br>,10,12 | 2,7,9,11,1<br>3,14,15,16      | 13 | P01681,P08937,P0DMW0;P0DMW1,P18418,P25031,P30904,P36860,P46844,P48508,Q05702,Q5<br>RLM2,Q66HG3,Q9R168                                                                                                                                                                   |
| 3049 | 1,3,4,5,6,8<br>,10,13 | 2,7,9,11,1<br>2,14,15,16      | 12 | O70257,O70594,P01681,P08937,P18418,P25031,P36860,P46844,P48508,Q63618,Q6Q0N1,Q9<br>WUW8                                                                                                                                                                                 |
| 3050 | 1,3,4,5,6,8<br>,10,14 | 2,7,9,11,1<br>2,13,15,16      | 14 | O70417,O70594,P01681,P08937,P18418,P20760,P25031,P48508,P54921,P97580,Q5RLM2,Q637<br>51,Q923S2,Q9WUW8                                                                                                                                                                   |
| 3051 | 1,3,4,5,6,8<br>,10,15 | 2,7,9,11,1<br>2,13,14,16      | 25 | O70377,O70594,O88339;Q4V882,P01681,P01946,P02091,P13432,P18418,P25031,P30904,P368<br>60,P38918,P46844,P48508,P53790,P54921,P62804,Q05175,Q498D9,Q63270,Q63618,Q6MG61,<br>Q6Q0N1,Q8R431,Q923S2                                                                           |
| 3052 | 1,3,4,5,6,8<br>,10,16 | 2,7,9,11,1<br>2,13,14,15      | 35 | O35077,O70257,O70377,O70594,P01681,P02783,P07151,P0DMW0;P0DMW1,P15399,P18418,P<br>18757,P19468,P20760,P23928,P25031,P46844,P48508,P53790,P57113,Q03248,Q05702,Q30KJ2,<br>Q3ZAV1,Q5M7T9,Q63270,Q63424,Q63618,Q64602,Q6MG61,Q6Q0N1,Q71MB6,Q8R431,Q923<br>S2,Q9WUW8,Q9Z0W7 |
| 3053 | 1,3,4,5,6,8<br>,11,12 | 2,7,9,10,1<br>3,14,15,16      | 21 | P01681,P02780,P06911,P08937,P14046,P22282,P36374,P97840,Q05702,Q4FZU2,Q5I0D1,Q5M8<br>C6,Q63493,Q6IFU7,Q6IFW6,Q6IG02,Q6IG05,Q6IMF3,Q6P6Q2,Q9JI85,Q9R168                                                                                                                  |
| 3054 | 1,3,4,5,6,8<br>,11,13 | 2,7,9,10,1<br>2,14,15,16      | 12 | P01681,P08937,P22282,Q4FZU2,Q62902,Q63493,Q6IFU7,Q6IFW6,Q6IG02,Q6IMF3,Q6P6Q2,Q9<br>JI85                                                                                                                                                                                 |
| 3055 | 1,3,4,5,6,8<br>,11,14 | 2,7,9,10,1<br>2,13,15,16      | 15 | P01681,P06911,P08937,P19218,P52590,Q4FZU2,Q4KLZ6,Q63493,Q63751,Q6IFU7,Q6IFW6,Q6I<br>G02,Q6IMF3,Q6P6Q2,Q9JI85                                                                                                                                                            |
| 3056 | 1,3,4,5,6,8<br>,11,15 | 2,7,9,10,1<br>2,13,14,16      | 14 | P01681,P01946,P02091,Q10758,Q4FZU2,Q63493,Q6IFU7,Q6IFU8,Q6IFW6,Q6IG02,Q6IG05,Q6I<br>MF3,Q6P6Q2,Q9JI85                                                                                                                                                                   |
| 3057 | 1,3,4,5,6,8<br>,11,16 | 2,7,9,10,1<br>2,13,14,15      | 32 | O35547,O88797,P01681,P02780,P02781,P02782,P02783,P04905,P07647,P08010,P08723,P0C0A<br>9,P18418,P20760,P22282,P22283,P30120,P36374,P46462,P60905,Q4FZU2,Q4KLZ6,Q5M8C6,Q6<br>2902,Q63493,Q6IFU7,Q6IFW6,Q6IG02,Q6IMF3,Q6P6Q2,Q9JHB9,Q9JI85                                 |
| 3058 | 1,3,4,5,6,8<br>,12,13 | 2,7,9,10,1<br>1,14,15,16      | 2  | P97840,Q9R168                                                                                                                                                                                                                                                           |
| 3059 | 1,3,4,5,6,8<br>,12,14 | 2,7,9,10,1<br>1,13,15,16      | 7  | O70417,P01681,P08937,P52590,Q5RLM2,Q63751,Q9R168                                                                                                                                                                                                                        |
| 3060 | 1,3,4,5,6,8<br>,12,15 | 2,7,9,10,1<br>1,13,14,16      | 6  | P01681,P01946,P02091,Q05702,Q6IG05,Q9R168                                                                                                                                                                                                                               |
| 3061 | 1,3,4,5,6,8<br>,12,16 | 2,7,9,10,1<br>1,13,14,15      | 7  | P01681,P02783,P0DMW0;P0DMW1,P20760,P46844,Q05702,Q9R168                                                                                                                                                                                                                 |

|      |                       |                          |    |                                                                                                       |
|------|-----------------------|--------------------------|----|-------------------------------------------------------------------------------------------------------|
| 3062 | 1,3,4,5,6,8<br>,13,14 | 2,7,9,10,1<br>1,12,15,16 | 6  | P01681,P08937,P20760,P52590,Q63751,Q9WUW8                                                             |
| 3063 | 1,3,4,5,6,8<br>,13,15 | 2,7,9,10,1<br>1,12,14,16 | 6  | P01681,P01946,P02091,P13432,P62804,Q498D9                                                             |
| 3064 | 1,3,4,5,6,8<br>,13,16 | 2,7,9,10,1<br>1,12,14,15 | 5  | P02783,P18418,P20760,P46844,Q9WUW8                                                                    |
| 3065 | 1,3,4,5,6,8<br>,14,15 | 2,7,9,10,1<br>1,12,13,16 | 9  | P01681,P01946,P02091,P08937,P13432,P20760,P54921,P62804,Q62714                                        |
| 3066 | 1,3,4,5,6,8<br>,14,16 | 2,7,9,10,1<br>1,12,13,15 | 6  | P01681,P02783,P08937,P20760,P52590,Q9WUW8                                                             |
| 3067 | 1,3,4,5,6,8<br>,15,16 | 2,7,9,10,1<br>1,12,13,14 | 14 | O35077,O70594,P01681,P01946,P02091,P02783,P13432,P17988,P20760,P46844,P48508,Q6327<br>0,Q6Q0N1,Q8R431 |
| 3068 | 1,3,4,5,6,9<br>,10,11 | 2,7,8,12,1<br>3,14,15,16 | 0  |                                                                                                       |
| 3069 | 1,3,4,5,6,9<br>,10,12 | 2,7,8,11,1<br>3,14,15,16 | 0  |                                                                                                       |
| 3070 | 1,3,4,5,6,9<br>,10,13 | 2,7,8,11,1<br>2,14,15,16 | 5  | P11883,P36860,P62804,Q00715,Q06000                                                                    |
| 3071 | 1,3,4,5,6,9<br>,10,14 | 2,7,8,11,1<br>2,13,15,16 | 1  | Q06000                                                                                                |
| 3072 | 1,3,4,5,6,9<br>,10,15 | 2,7,8,11,1<br>2,13,14,16 | 8  | P01681,P01946,P02091,P30120,P36860,P62804,Q00715,Q811M5                                               |
| 3073 | 1,3,4,5,6,9<br>,10,16 | 2,7,8,11,1<br>2,13,14,15 | 3  | P02783,P11883,Q811M5                                                                                  |
| 3074 | 1,3,4,5,6,9<br>,11,12 | 2,7,8,10,1<br>3,14,15,16 | 2  | P61206;P84079,Q03191                                                                                  |
| 3075 | 1,3,4,5,6,9<br>,11,13 | 2,7,8,10,1<br>2,14,15,16 | 0  |                                                                                                       |
| 3076 | 1,3,4,5,6,9<br>,11,14 | 2,7,8,10,1<br>2,13,15,16 | 2  | Q4KLZ6,Q63751                                                                                         |
| 3077 | 1,3,4,5,6,9<br>,11,15 | 2,7,8,10,1<br>2,13,14,16 | 8  | P01681,P01946,P02091,P62804,Q4FZU2,Q6IFW6,Q6IG02,Q6P6Q2                                               |
| 3078 | 1,3,4,5,6,9<br>,11,16 | 2,7,8,10,1<br>2,13,14,15 | 3  | P02783,P22006,Q4KLZ6                                                                                  |
| 3079 | 1,3,4,5,6,9<br>,12,13 | 2,7,8,10,1<br>1,14,15,16 | 1  | P62804                                                                                                |
| 3080 | 1,3,4,5,6,9<br>,12,14 | 2,7,8,10,1<br>1,13,15,16 | 0  |                                                                                                       |
| 3081 | 1,3,4,5,6,9<br>,12,15 | 2,7,8,10,1<br>1,13,14,16 | 3  | P01946,P02091,P62804                                                                                  |

|      |                        |                          |                                                           |
|------|------------------------|--------------------------|-----------------------------------------------------------|
| 3082 | 1,3,4,5,6,9<br>,12,16  | 2,7,8,10,1<br>1,13,14,15 | 0                                                         |
| 3083 | 1,3,4,5,6,9<br>,13,14  | 2,7,8,10,1<br>1,12,15,16 | 2 P62804,Q00715                                           |
| 3084 | 1,3,4,5,6,9<br>,13,15  | 2,7,8,10,1<br>1,12,14,16 | 5 P01946,P02091,P11883,P62804,Q00715                      |
| 3085 | 1,3,4,5,6,9<br>,13,16  | 2,7,8,10,1<br>1,12,14,15 | 2 P11883,P62804                                           |
| 3086 | 1,3,4,5,6,9<br>,14,15  | 2,7,8,10,1<br>1,12,13,16 | 4 P01946,P02091,P62804,Q00715                             |
| 3087 | 1,3,4,5,6,9<br>,14,16  | 2,7,8,10,1<br>1,12,13,15 | 4 P02783,P23593,P52590,Q09030                             |
| 3088 | 1,3,4,5,6,9<br>,15,16  | 2,7,8,10,1<br>1,12,13,14 | 6 P01946,P02091,P02783,P11883,P23593,P62804               |
| 3089 | 1,3,4,5,6,1<br>0,11,12 | 2,7,8,9,13,<br>14,15,16  | 2 P47967,P97840                                           |
| 3090 | 1,3,4,5,6,1<br>0,11,13 | 2,7,8,9,12,<br>14,15,16  | 1 P97840                                                  |
| 3091 | 1,3,4,5,6,1<br>0,11,14 | 2,7,8,9,12,<br>13,15,16  | 1 Q4KLZ6                                                  |
| 3092 | 1,3,4,5,6,1<br>0,11,15 | 2,7,8,9,12,<br>13,14,16  | 6 P01946,P02091,Q4FZU2,Q6IFW6,Q6IG02,Q6P6Q2               |
| 3093 | 1,3,4,5,6,1<br>0,11,16 | 2,7,8,9,12,<br>13,14,15  | 3 P02783,P07647,Q4KLZ6                                    |
| 3094 | 1,3,4,5,6,1<br>0,12,13 | 2,7,8,9,11,<br>14,15,16  | 2 P36860,P97840                                           |
| 3095 | 1,3,4,5,6,1<br>0,12,14 | 2,7,8,9,11,<br>13,15,16  | 1 Q5RLM2                                                  |
| 3096 | 1,3,4,5,6,1<br>0,12,15 | 2,7,8,9,11,<br>13,14,16  | 5 P01946,P02091,P36860,P62804,Q812E4                      |
| 3097 | 1,3,4,5,6,1<br>0,12,16 | 2,7,8,9,11,<br>13,14,15  | 2 P02783,P0DMW0;P0DMW1                                    |
| 3098 | 1,3,4,5,6,1<br>0,13,14 | 2,7,8,9,11,<br>12,15,16  | 2 P62804,Q06000                                           |
| 3099 | 1,3,4,5,6,1<br>0,13,15 | 2,7,8,9,11,<br>12,14,16  | 8 A2RUW1,P01946,P02091,P11883,P36860,P62804,Q00715,Q812E4 |
| 3100 | 1,3,4,5,6,1<br>0,13,16 | 2,7,8,9,11,<br>12,14,15  | 1 P11883                                                  |
| 3101 | 1,3,4,5,6,1<br>0,14,15 | 2,7,8,9,11,<br>12,13,16  | 4 P01946,P02091,P54921,P62804                             |

|      |                        |                         |    |                                                                       |
|------|------------------------|-------------------------|----|-----------------------------------------------------------------------|
| 3102 | 1,3,4,5,6,1<br>0,14,16 | 2,7,8,9,11,<br>12,13,15 | 2  | P02783,P52590                                                         |
| 3103 | 1,3,4,5,6,1<br>0,15,16 | 2,7,8,9,11,<br>12,13,14 | 7  | P01946,P02091,P02783,P11883,P17988,P62804,Q63270                      |
| 3104 | 1,3,4,5,6,1<br>1,12,13 | 2,7,8,9,10,<br>14,15,16 | 3  | P47967,P97840,Q5I0D1                                                  |
| 3105 | 1,3,4,5,6,1<br>1,12,14 | 2,7,8,9,10,<br>13,15,16 | 1  | Q4KLZ6                                                                |
| 3106 | 1,3,4,5,6,1<br>1,12,15 | 2,7,8,9,10,<br>13,14,16 | 6  | P01946,P02091,Q4FZU2,Q6IFW6,Q6IG02,Q6P6Q2                             |
| 3107 | 1,3,4,5,6,1<br>1,12,16 | 2,7,8,9,10,<br>13,14,15 | 5  | O35547,P02783,P07647,P97840,Q4KLZ6                                    |
| 3108 | 1,3,4,5,6,1<br>1,13,14 | 2,7,8,9,10,<br>12,15,16 | 1  | Q4KLZ6                                                                |
| 3109 | 1,3,4,5,6,1<br>1,13,15 | 2,7,8,9,10,<br>12,14,16 | 8  | P01946,P02091,P21674,P62804,Q4FZU2,Q6IFW6,Q6IG02,Q6P6Q2               |
| 3110 | 1,3,4,5,6,1<br>1,13,16 | 2,7,8,9,10,<br>12,14,15 | 3  | P02783,P07647,Q4KLZ6                                                  |
| 3111 | 1,3,4,5,6,1<br>1,14,15 | 2,7,8,9,10,<br>12,13,16 | 7  | P01946,P02091,Q4FZU2,Q4KLZ6,Q6IFW6,Q6IG02,Q6P6Q2                      |
| 3112 | 1,3,4,5,6,1<br>1,14,16 | 2,7,8,9,10,<br>12,13,15 | 4  | P02783,P07647,P52590,Q4KLZ6                                           |
| 3113 | 1,3,4,5,6,1<br>1,15,16 | 2,7,8,9,10,<br>12,13,14 | 10 | P01946,P02091,P02783,P17988,Q4FZU2,Q4KLZ6,Q6IFW6,Q6IG02,Q6IMF3,Q6P6Q2 |
| 3114 | 1,3,4,5,6,1<br>2,13,14 | 2,7,8,9,10,<br>11,15,16 | 1  | P20766                                                                |
| 3115 | 1,3,4,5,6,1<br>2,13,15 | 2,7,8,9,10,<br>11,14,16 | 3  | P01946,P02091,P62804                                                  |
| 3116 | 1,3,4,5,6,1<br>2,13,16 | 2,7,8,9,10,<br>11,14,15 | 1  | P97840                                                                |
| 3117 | 1,3,4,5,6,1<br>2,14,15 | 2,7,8,9,10,<br>11,13,16 | 2  | P01946,P02091                                                         |
| 3118 | 1,3,4,5,6,1<br>2,14,16 | 2,7,8,9,10,<br>11,13,15 | 2  | P02783,P52590                                                         |
| 3119 | 1,3,4,5,6,1<br>2,15,16 | 2,7,8,9,10,<br>11,13,14 | 3  | P01946,P02091,P02783                                                  |
| 3120 | 1,3,4,5,6,1<br>3,14,15 | 2,7,8,9,10,<br>11,12,16 | 4  | P01946,P02091,P62804,Q00715                                           |
| 3121 | 1,3,4,5,6,1<br>3,14,16 | 2,7,8,9,10,<br>11,12,15 | 2  | P02783,P52590                                                         |

|      |                        |                               |    |                                                                                                                                                                                                                                                                                                       |
|------|------------------------|-------------------------------|----|-------------------------------------------------------------------------------------------------------------------------------------------------------------------------------------------------------------------------------------------------------------------------------------------------------|
| 3122 | 1,3,4,5,6,1<br>3,15,16 | 2,7,8,9,10,<br>11,12,14       | 6  | P01946,P02091,P02783,P11883,P62804,P97584                                                                                                                                                                                                                                                             |
| 3123 | 1,3,4,5,6,1<br>4,15,16 | 2,7,8,9,10,<br>11,12,13       | 4  | P01946,P02091,P02783,P52590                                                                                                                                                                                                                                                                           |
| 3124 | 1,3,4,5,7,8<br>,9,10   | 2,6,11,12,<br>13,14,15,1<br>6 | 11 | O70417,O70594,P01681,P06760,P08937,P20646,P20760,P70545,Q6P6R2,Q9QX74,Q9Z0V6                                                                                                                                                                                                                          |
| 3125 | 1,3,4,5,7,8<br>,9,11   | 2,6,10,12,<br>13,14,15,1<br>6 | 19 | P01681,P02780,P06760,P08649,P20646,P22282,P27590,P35280,P49134,Q4FZU2,Q5M8C6,Q63493,Q6IFU8,Q6IFW6,Q6IMF3,Q6P6Q2,Q6P6R2,Q812E4,Q9QX74                                                                                                                                                                  |
| 3126 | 1,3,4,5,7,8<br>,9,12   | 2,6,10,11,<br>13,14,15,1<br>6 | 5  | O70417,P01681,P06760,P20646,Q9QX74                                                                                                                                                                                                                                                                    |
| 3127 | 1,3,4,5,7,8<br>,9,13   | 2,6,10,11,<br>12,14,15,1<br>6 | 6  | P01681,P06760,P08649,P20646,P20760,Q9QX74                                                                                                                                                                                                                                                             |
| 3128 | 1,3,4,5,7,8<br>,9,14   | 2,6,10,11,<br>12,13,15,1<br>6 | 10 | O70417,P01681,P06760,P08649,P08937,P20646,P20760,Q5QE79,Q63751,Q9QX74                                                                                                                                                                                                                                 |
| 3129 | 1,3,4,5,7,8<br>,9,15   | 2,6,10,11,<br>12,13,14,1<br>6 | 7  | P01681,P06760,P08649,P20646,P35280,Q9QX74,Q9Z0V6                                                                                                                                                                                                                                                      |
| 3130 | 1,3,4,5,7,8<br>,9,16   | 2,6,10,11,<br>12,13,14,1<br>5 | 6  | P01681,P06760,P08649,P20646,P20760,Q9QX74                                                                                                                                                                                                                                                             |
| 3131 | 1,3,4,5,7,8<br>,10,11  | 2,6,9,12,1<br>3,14,15,16      | 22 | P01681,P02780,P06760,P08937,P20646,P22282,P27590,P30904,P47967,P97840,Q4FZU2,Q4G075,Q5M8C6,Q63493,Q6B345,Q6IFU7,Q6IFU8,Q6IFW6,Q6IG02,Q6IMF3,Q6P6Q2,Q9QX74                                                                                                                                             |
| 3132 | 1,3,4,5,7,8<br>,10,12  | 2,6,9,11,1<br>3,14,15,16      | 15 | O70417,P01681,P0DMW0,P0DMW1,P20646,P30904,P46844,P47967,P48508,P97840,Q5RLM2,Q63270,Q6MG61,Q6Q0N1,Q8R431,Q9QX74                                                                                                                                                                                       |
| 3133 | 1,3,4,5,7,8<br>,10,13  | 2,6,9,11,1<br>2,14,15,16      | 24 | O35077,O70257,O70594,P01681,P19468,P20646,P30904,P36860,P46844,P47967,P48508,P57113,P97840,Q63355,Q63424,Q63618,Q64093,Q6MG61,Q6Q0N1,Q80W57,Q8R431,Q9QX74,Q9WUW8,Q9WUW9                                                                                                                               |
| 3134 | 1,3,4,5,7,8<br>,10,14  | 2,6,9,11,1<br>2,13,15,16      | 20 | D3ZUC6,O35077,O70417,O70594,P01681,P08937,P20646,P20760,P46844,P48508,P54921,P57113,Q5RLM2,Q63355,Q63751,Q8R431,Q923S2,Q9QX74,Q9WUW8,Q9WUW9                                                                                                                                                           |
| 3135 | 1,3,4,5,7,8<br>,10,15  | 2,6,9,11,1<br>2,13,14,16      | 41 | O35077,O35763,O70377,O70594,O88339,Q4V882,P01681,P08721,P10536,P18757,P19468,P20646,P30904,P38918,P46844,P48508,P53790,P54921,P57113,P97840,Q03248,Q05175,Q3ZAV1,Q5I0E9,Q5M7T9,Q5RK11,Q63270,Q63355,Q63424,Q63618,Q64093,Q6MG61,Q6Q0N1,Q80W57,Q8R431,Q923S2,Q99MZ8,Q9JJ19,Q9QX74,Q9WTW7,Q9Z0V6,Q9Z0W7 |

|      |                       |                          |                                                                                                                                                                                                                                                                                                                                                                    |
|------|-----------------------|--------------------------|--------------------------------------------------------------------------------------------------------------------------------------------------------------------------------------------------------------------------------------------------------------------------------------------------------------------------------------------------------------------|
| 3136 | 1,3,4,5,7,8<br>,10,16 | 2,6,9,11,1<br>2,13,14,15 | 47 O35077,O35763,O70257,O70377,O70594,P01681,P0DMW0;P0DMW1,P18757,P19468,P20646,<br>P20760,P29975,P46413,P46720,P46844,P48508,P53790,P57113,P97840,Q03248,Q05175,Q3ZA<br>V1,Q5I0E9,Q5M7T9,Q5RLM2,Q63270,Q63355,Q63424,Q63618,Q64093,Q64319,Q64602,Q6AY<br>41,Q6MG61,Q6Q0N1,Q6TMA8,Q71MB6,Q80W57,Q8R431,Q923S2,Q9JJ19,Q9JJ40,Q9QX74,Q9<br>WTW7,Q9WUW8,Q9WUW9,Q9Z0W7 |
| 3137 | 1,3,4,5,7,8<br>,11,12 | 2,6,9,10,1<br>3,14,15,16 | 24 P01681,P02780,P02781,P06760,P08649,P22282,P27590,P36374,P40241,P47967,P70709,P97840<br>,Q4FZU2,Q4G075,Q5I0D1,Q5M8C6,Q63493,Q6IFU8,Q6IFW6,Q6IG02,Q6IMF3,Q6P6Q2,Q811M5<br>,Q9QX74                                                                                                                                                                                 |
| 3138 | 1,3,4,5,7,8<br>,11,13 | 2,6,9,10,1<br>2,14,15,16 | 29 B0BNN3,P01681,P02780,P02781,P02782,P06760,P08649,P20646,P22273,P22282,P22283,P3637<br>4,P40241,P47967,P97840,Q4FZU2,Q4G075,Q5I0D1,Q5M8C6,Q62902,Q63493,Q6IFU7,Q6IFU8,<br>Q6IFW6,Q6IG02,Q6IMF3,Q6P6Q2,Q811M5,Q9QX74                                                                                                                                              |
| 3139 | 1,3,4,5,7,8<br>,11,14 | 2,6,9,10,1<br>2,13,15,16 | 23 B0BNN3,D3ZUC6,P01681,P02780,P02781,P06760,P08649,P08937,P20646,P22282,Q4FZU2,Q4G<br>075,Q5M8C6,Q63493,Q63751,Q6IFU7,Q6IFU8,Q6IFW6,Q6IG02,Q6IMF3,Q6P6Q2,Q811M5,Q9Q<br>X74                                                                                                                                                                                        |
| 3140 | 1,3,4,5,7,8<br>,11,15 | 2,6,9,10,1<br>2,13,14,16 | 20 P01681,P02780,P06760,P08649,P08721,P20646,P97840,Q4FZU2,Q4G075,Q5M8C6,Q63493,Q6I<br>FU7,Q6IFU8,Q6IFW6,Q6IG02,Q6IMF3,Q6P6Q2,Q8CJ52,Q9QX74,Q9Z0V6                                                                                                                                                                                                                 |
| 3141 | 1,3,4,5,7,8<br>,11,16 | 2,6,9,10,1<br>2,13,14,15 | 38 O35547,P00762,P01681,P02780,P02781,P02782,P04905,P06760,P07647,P08010,P08649,P0872<br>3,P09456,P0C0A9,P16636,P20646,P22273,P22282,P22283,P30120,P36374,P40241,P46462,P479<br>67,P97840,Q4FZU2,Q4G075,Q5M8C6,Q62902,Q63493,Q6IFU7,Q6IFU8,Q6IFW6,Q6IG02,Q6IMF<br>3,Q6P6Q2,Q9JHB9,Q9QX74                                                                           |
| 3142 | 1,3,4,5,7,8<br>,12,13 | 2,6,9,10,1<br>1,14,15,16 | 4 P01681,P47967,P97840,Q9QX74                                                                                                                                                                                                                                                                                                                                      |
| 3143 | 1,3,4,5,7,8<br>,12,14 | 2,6,9,10,1<br>1,13,15,16 | 9 D3ZUC6,O70417,P01681,P08649,P08937,Q5RLM2,Q63751,Q811M5,Q9QX74                                                                                                                                                                                                                                                                                                   |
| 3144 | 1,3,4,5,7,8<br>,12,15 | 2,6,9,10,1<br>1,13,14,16 | 7 D3ZUC6,O89117,P01681,P10758,P20646,P97840,Q9QX74                                                                                                                                                                                                                                                                                                                 |
| 3145 | 1,3,4,5,7,8<br>,12,16 | 2,6,9,10,1<br>1,13,14,15 | 9 P01681,P02781,P08649,P20646,P46844,P47967,P97840,Q5RLM2,Q9QX74                                                                                                                                                                                                                                                                                                   |
| 3146 | 1,3,4,5,7,8<br>,13,14 | 2,6,9,10,1<br>1,12,15,16 | 12 B0BNN3,D3ZUC6,P01681,P08649,P08937,P20646,Q63751,Q811M5,Q99MH3,Q9QX74,Q9WUW<br>8,Q9Z2L0                                                                                                                                                                                                                                                                         |
| 3147 | 1,3,4,5,7,8<br>,13,15 | 2,6,9,10,1<br>1,12,14,16 | 7 O70594,P01681,P08649,P20646,P97840,Q6Q0N1,Q9QX74                                                                                                                                                                                                                                                                                                                 |
| 3148 | 1,3,4,5,7,8<br>,13,16 | 2,6,9,10,1<br>1,12,14,15 | 16 B0BNN3,O35077,P00762,P01681,P02781,P08649,P20646,P46844,P47967,P97840,Q62902,Q6T<br>MA8,Q8R431,Q99MH3,Q9QX74,Q9WUW8                                                                                                                                                                                                                                             |
| 3149 | 1,3,4,5,7,8<br>,14,15 | 2,6,9,10,1<br>1,12,13,16 | 8 D3ZUC6,P01681,P08649,P20646,P37996,P54921,Q9QX74,Q9WUW8                                                                                                                                                                                                                                                                                                          |
| 3150 | 1,3,4,5,7,8<br>,14,16 | 2,6,9,10,1<br>1,12,13,15 | 15 B0BNN3,O35077,O70417,P01681,P08649,P08937,P20646,P20760,P46844,Q5RLM2,Q63751,Q6<br>TMA8,Q99MH3,Q9QX74,Q9WUW8                                                                                                                                                                                                                                                    |
| 3151 | 1,3,4,5,7,8<br>,15,16 | 2,6,9,10,1<br>1,12,13,14 | 21 O35077,O70594,P01681,P08649,P17988,P19468,P20646,P46844,P48508,P53790,Q63270,Q634<br>24,Q64093,Q6MG61,Q6Q0N1,Q6TMA8,Q8R431,Q9QX74,Q9WTW7,Q9Z0V6,Q9Z0W7                                                                                                                                                                                                          |

|      |                       |                          |                                                    |
|------|-----------------------|--------------------------|----------------------------------------------------|
| 3152 | 1,3,4,5,7,9<br>,10,11 | 2,6,8,12,1<br>3,14,15,16 | 0                                                  |
| 3153 | 1,3,4,5,7,9<br>,10,12 | 2,6,8,11,1<br>3,14,15,16 | 2 P97840,Q03191                                    |
| 3154 | 1,3,4,5,7,9<br>,10,13 | 2,6,8,11,1<br>2,14,15,16 | 0                                                  |
| 3155 | 1,3,4,5,7,9<br>,10,14 | 2,6,8,11,1<br>2,13,15,16 | 0                                                  |
| 3156 | 1,3,4,5,7,9<br>,10,15 | 2,6,8,11,1<br>2,13,14,16 | 2 P01681,Q5RK1                                     |
| 3157 | 1,3,4,5,7,9<br>,10,16 | 2,6,8,11,1<br>2,13,14,15 | 0                                                  |
| 3158 | 1,3,4,5,7,9<br>,11,12 | 2,6,8,10,1<br>3,14,15,16 | 4 P47967,P97840,Q03191,Q5I0D1                      |
| 3159 | 1,3,4,5,7,9<br>,11,13 | 2,6,8,10,1<br>2,14,15,16 | 3 P08649,P47967,P97840                             |
| 3160 | 1,3,4,5,7,9<br>,11,14 | 2,6,8,10,1<br>2,13,15,16 | 2 P08649,Q63751                                    |
| 3161 | 1,3,4,5,7,9<br>,11,15 | 2,6,8,10,1<br>2,13,14,16 | 7 P01681,P08649,Q4FZU2,Q6IFW6,Q6IG02,Q6IMF3,Q6P6Q2 |
| 3162 | 1,3,4,5,7,9<br>,11,16 | 2,6,8,10,1<br>2,13,14,15 | 1 P08649                                           |
| 3163 | 1,3,4,5,7,9<br>,12,13 | 2,6,8,10,1<br>1,14,15,16 | 2 P47967,P97840                                    |
| 3164 | 1,3,4,5,7,9<br>,12,14 | 2,6,8,10,1<br>1,13,15,16 | 2 Q63751,Q68G31                                    |
| 3165 | 1,3,4,5,7,9<br>,12,15 | 2,6,8,10,1<br>1,13,14,16 | 4 O89117,P01681,P10758,Q68G31                      |
| 3166 | 1,3,4,5,7,9<br>,12,16 | 2,6,8,10,1<br>1,13,14,15 | 2 P97840,Q68G31                                    |
| 3167 | 1,3,4,5,7,9<br>,13,14 | 2,6,8,10,1<br>1,12,15,16 | 0                                                  |
| 3168 | 1,3,4,5,7,9<br>,13,15 | 2,6,8,10,1<br>1,12,14,16 | 3 P01681,P62804,Q00715                             |
| 3169 | 1,3,4,5,7,9<br>,13,16 | 2,6,8,10,1<br>1,12,14,15 | 0                                                  |
| 3170 | 1,3,4,5,7,9<br>,14,15 | 2,6,8,10,1<br>1,12,13,16 | 2 P01681,P08649                                    |
| 3171 | 1,3,4,5,7,9<br>,14,16 | 2,6,8,10,1<br>1,12,13,15 | 2 P08649,Q68G31                                    |



|      |                        |                          |    |                                                                                                                                                           |
|------|------------------------|--------------------------|----|-----------------------------------------------------------------------------------------------------------------------------------------------------------|
| 3172 | 1,3,4,5,7,9<br>,15,16  | 2,6,8,10,1<br>1,12,13,14 | 2  | P01681,Q68G31                                                                                                                                             |
| 3173 | 1,3,4,5,7,1<br>0,11,12 | 2,6,8,9,13,<br>14,15,16  | 3  | P47967,P97840,Q5I0D1                                                                                                                                      |
| 3174 | 1,3,4,5,7,1<br>0,11,13 | 2,6,8,9,12,<br>14,15,16  | 3  | P47967,P97840,Q5I0D1                                                                                                                                      |
| 3175 | 1,3,4,5,7,1<br>0,11,14 | 2,6,8,9,12,<br>13,15,16  | 0  |                                                                                                                                                           |
| 3176 | 1,3,4,5,7,1<br>0,11,15 | 2,6,8,9,12,<br>13,14,16  | 8  | P08721,P97840,Q4FZU2,Q5RKI1,Q6IFW6,Q6IG02,Q6IMF3,Q6P6Q2                                                                                                   |
| 3177 | 1,3,4,5,7,1<br>0,11,16 | 2,6,8,9,12,<br>13,14,15  | 2  | P47967,P97840                                                                                                                                             |
| 3178 | 1,3,4,5,7,1<br>0,12,13 | 2,6,8,9,11,<br>14,15,16  | 2  | P47967,P97840                                                                                                                                             |
| 3179 | 1,3,4,5,7,1<br>0,12,14 | 2,6,8,9,11,<br>13,15,16  | 2  | P97840,Q5RLM2                                                                                                                                             |
| 3180 | 1,3,4,5,7,1<br>0,12,15 | 2,6,8,9,11,<br>13,14,16  | 4  | O89117,P10758,P97840,Q5RKI1                                                                                                                               |
| 3181 | 1,3,4,5,7,1<br>0,12,16 | 2,6,8,9,11,<br>13,14,15  | 5  | P0DMW0;P0DMW1,P10758,P18297,P47967,P97840                                                                                                                 |
| 3182 | 1,3,4,5,7,1<br>0,13,14 | 2,6,8,9,11,<br>12,15,16  | 1  | Q9WUW8                                                                                                                                                    |
| 3183 | 1,3,4,5,7,1<br>0,13,15 | 2,6,8,9,11,<br>12,14,16  | 2  | P97840,Q5RKI1                                                                                                                                             |
| 3184 | 1,3,4,5,7,1<br>0,13,16 | 2,6,8,9,11,<br>12,14,15  | 11 | O35077,P18297,P19468,P46844,P47967,P97840,Q63424,Q64093,Q8R431,Q99MH3,Q9WUW8                                                                              |
| 3185 | 1,3,4,5,7,1<br>0,14,15 | 2,6,8,9,11,<br>12,13,16  | 2  | P54921,Q5RKI1                                                                                                                                             |
| 3186 | 1,3,4,5,7,1<br>0,14,16 | 2,6,8,9,11,<br>12,13,15  | 7  | O35077,P18297,P57113,Q5RLM2,Q71MB6,Q99MH3,Q9WUW8                                                                                                          |
| 3187 | 1,3,4,5,7,1<br>0,15,16 | 2,6,8,9,11,<br>12,13,14  | 22 | O35077,O70594,P08721,P10758,P17988,P18297,P19468,P46844,P48508,P53790,P97840,Q03248,Q5I0E9,Q63270,Q63355,Q63424,Q64093,Q6Q0N1,Q71MB6,Q80W57,Q8R431,Q9WTW7 |
| 3188 | 1,3,4,5,7,1<br>1,12,13 | 2,6,8,9,10,<br>14,15,16  | 4  | P47967,P97840,Q5I0D1,Q811M5                                                                                                                               |
| 3189 | 1,3,4,5,7,1<br>1,12,14 | 2,6,8,9,10,<br>13,15,16  | 4  | P47967,P97840,Q5I0D1,Q811M5                                                                                                                               |
| 3190 | 1,3,4,5,7,1<br>1,12,15 | 2,6,8,9,10,<br>13,14,16  | 8  | P47967,P97840,Q4FZU2,Q5I0D1,Q6IFW6,Q6IG02,Q6IMF3,Q6P6Q2                                                                                                   |
| 3191 | 1,3,4,5,7,1<br>1,12,16 | 2,6,8,9,10,<br>13,14,15  | 3  | P47967,P97840,Q5I0D1                                                                                                                                      |

|      |                        |                          |    |                                                                       |
|------|------------------------|--------------------------|----|-----------------------------------------------------------------------|
| 3192 | 1,3,4,5,7,1<br>1,13,14 | 2,6,8,9,10,<br>12,15,16  | 4  | B0BNN3,P08649,P97840,Q811M5                                           |
| 3193 | 1,3,4,5,7,1<br>1,13,15 | 2,6,8,9,10,<br>12,14,16  | 8  | P08649,P47967,P97840,Q4FZU2,Q6IFW6,Q6IG02,Q6IMF3,Q6P6Q2               |
| 3194 | 1,3,4,5,7,1<br>1,13,16 | 2,6,8,9,10,<br>12,14,15  | 6  | P07647,P08649,P47967,P97840,Q08463,Q99MH3                             |
| 3195 | 1,3,4,5,7,1<br>1,14,15 | 2,6,8,9,10,<br>12,13,16  | 6  | P08649,Q4FZU2,Q6IFW6,Q6IG02,Q6IMF3,Q6P6Q2                             |
| 3196 | 1,3,4,5,7,1<br>1,14,16 | 2,6,8,9,10,<br>12,13,15  | 2  | P08649,Q99MH3                                                         |
| 3197 | 1,3,4,5,7,1<br>1,15,16 | 2,6,8,9,10,<br>12,13,14  | 10 | P08649,P08721,P17988,P97840,Q4FZU2,Q6IFW6,Q6IG02,Q6IMF3,Q6P6Q2,Q8CJ52 |
| 3198 | 1,3,4,5,7,1<br>2,13,14 | 2,6,8,9,10,<br>11,15,16  | 3  | P47967,P97840,Q811M5                                                  |
| 3199 | 1,3,4,5,7,1<br>2,13,15 | 2,6,8,9,10,<br>11,14,16  | 3  | O89117,P47967,P97840                                                  |
| 3200 | 1,3,4,5,7,1<br>2,13,16 | 2,6,8,9,10,<br>11,14,15  | 3  | P47967,P97840,Q99MH3                                                  |
| 3201 | 1,3,4,5,7,1<br>2,14,15 | 2,6,8,9,10,<br>11,13,16  | 2  | D3ZUC6,O89117                                                         |
| 3202 | 1,3,4,5,7,1<br>2,14,16 | 2,6,8,9,10,<br>11,13,15  | 4  | P97840,Q5RLM2,Q68G31,Q99MH3                                           |
| 3203 | 1,3,4,5,7,1<br>2,15,16 | 2,6,8,9,10,<br>11,13,14  | 3  | P10758,P97840,Q68G31                                                  |
| 3204 | 1,3,4,5,7,1<br>3,14,15 | 2,6,8,9,10,<br>11,12,16  | 0  |                                                                       |
| 3205 | 1,3,4,5,7,1<br>3,14,16 | 2,6,8,9,10,<br>11,12,15  | 3  | B0BNN3,Q99MH3,Q9WUW8                                                  |
| 3206 | 1,3,4,5,7,1<br>3,15,16 | 2,6,8,9,10,<br>11,12,14  | 1  | P97840                                                                |
| 3207 | 1,3,4,5,7,1<br>4,15,16 | 2,6,8,9,10,<br>11,12,13  | 1  | P08649                                                                |
| 3208 | 1,3,4,5,8,9<br>,10,11  | 2,6,7,12,1<br>3,14,15,16 | 8  | O88797,P01681,P01835,P27590,Q4FZU2,Q6IFW6,Q6IMF3,Q6P6Q2               |
| 3209 | 1,3,4,5,8,9<br>,10,12  | 2,6,7,11,1<br>3,14,15,16 | 2  | P01681,P01835                                                         |
| 3210 | 1,3,4,5,8,9<br>,10,13  | 2,6,7,11,1<br>2,14,15,16 | 1  | P01681                                                                |
| 3211 | 1,3,4,5,8,9<br>,10,14  | 2,6,7,11,1<br>2,13,15,16 | 3  | P01681,P01835,P20760                                                  |

|      |                        |                          |    |                                                                                     |
|------|------------------------|--------------------------|----|-------------------------------------------------------------------------------------|
| 3212 | 1,3,4,5,8,9<br>,10,15  | 2,6,7,11,1<br>2,13,14,16 | 3  | P01681,P01835,P62804                                                                |
| 3213 | 1,3,4,5,8,9<br>,10,16  | 2,6,7,11,1<br>2,13,14,15 | 3  | P01681,P01835,P20760                                                                |
| 3214 | 1,3,4,5,8,9<br>,11,12  | 2,6,7,10,1<br>3,14,15,16 | 9  | O88797,P01681,P01835,P27590,Q4FZU2,Q6IFW6,Q6IMF3,Q6P6Q2,Q6Q7Y5                      |
| 3215 | 1,3,4,5,8,9<br>,11,13  | 2,6,7,10,1<br>2,14,15,16 | 4  | P01681,Q4FZU2,Q6IMF3,Q6P6Q2                                                         |
| 3216 | 1,3,4,5,8,9<br>,11,14  | 2,6,7,10,1<br>2,13,15,16 | 8  | O88797,P01681,P01835,Q4FZU2,Q63751,Q6IFW6,Q6IMF3,Q6P6Q2                             |
| 3217 | 1,3,4,5,8,9<br>,11,15  | 2,6,7,10,1<br>2,13,14,16 | 10 | O88797,P01681,P01835,Q4FZU2,Q6IFU7,Q6IFU8,Q6IFW6,Q6IG02,Q6IMF3,Q6P6Q2               |
| 3218 | 1,3,4,5,8,9<br>,11,16  | 2,6,7,10,1<br>2,13,14,15 | 7  | O88797,P01681,P01835,Q4FZU2,Q6IFW6,Q6IMF3,Q6P6Q2                                    |
| 3219 | 1,3,4,5,8,9<br>,12,13  | 2,6,7,10,1<br>1,14,15,16 | 1  | P01681                                                                              |
| 3220 | 1,3,4,5,8,9<br>,12,14  | 2,6,7,10,1<br>1,13,15,16 | 1  | P01681                                                                              |
| 3221 | 1,3,4,5,8,9<br>,12,15  | 2,6,7,10,1<br>1,13,14,16 | 3  | P01681,P01835,P36376                                                                |
| 3222 | 1,3,4,5,8,9<br>,12,16  | 2,6,7,10,1<br>1,13,14,15 | 2  | P01681,P01835                                                                       |
| 3223 | 1,3,4,5,8,9<br>,13,14  | 2,6,7,10,1<br>1,12,15,16 | 1  | P01681                                                                              |
| 3224 | 1,3,4,5,8,9<br>,13,15  | 2,6,7,10,1<br>1,12,14,16 | 3  | P01681,P62804,Q00715                                                                |
| 3225 | 1,3,4,5,8,9<br>,13,16  | 2,6,7,10,1<br>1,12,14,15 | 1  | P01681                                                                              |
| 3226 | 1,3,4,5,8,9<br>,14,15  | 2,6,7,10,1<br>1,12,13,16 | 1  | P01681                                                                              |
| 3227 | 1,3,4,5,8,9<br>,14,16  | 2,6,7,10,1<br>1,12,13,15 | 3  | P01681,P20760,P23593                                                                |
| 3228 | 1,3,4,5,8,9<br>,15,16  | 2,6,7,10,1<br>1,12,13,14 | 2  | P01681,P23593                                                                       |
| 3229 | 1,3,4,5,8,1<br>0,11,12 | 2,6,7,9,13,<br>14,15,16  | 12 | P01681,P01835,P27590,P47967,P97840,Q4FZU2,Q5I0D1,Q6IFU7,Q6IFW6,Q6IG02,Q6IMF3,Q6P6Q2 |
| 3230 | 1,3,4,5,8,1<br>0,11,13 | 2,6,7,9,12,<br>14,15,16  | 9  | P01681,P47967,P97840,Q4FZU2,Q6IFU7,Q6IFW6,Q6IG02,Q6IMF3,Q6P6Q2                      |
| 3231 | 1,3,4,5,8,1<br>0,11,14 | 2,6,7,9,12,<br>13,15,16  | 8  | P01681,P01835,Q4FZU2,Q6IFU7,Q6IFW6,Q6IG02,Q6IMF3,Q6P6Q2                             |

|      |                        |                         |    |                                                                                                   |
|------|------------------------|-------------------------|----|---------------------------------------------------------------------------------------------------|
| 3232 | 1,3,4,5,8,1<br>0,11,15 | 2,6,7,9,12,<br>13,14,16 | 9  | P01681,P01835,Q4FZU2,Q6IFU7,Q6IFU8,Q6IFW6,Q6IG02,Q6IMF3,Q6P6Q2                                    |
| 3233 | 1,3,4,5,8,1<br>0,11,16 | 2,6,7,9,12,<br>13,14,15 | 9  | O88797,P01681,P01835,Q4FZU2,Q6IFU7,Q6IFW6,Q6IG02,Q6IMF3,Q6P6Q2                                    |
| 3234 | 1,3,4,5,8,1<br>0,12,13 | 2,6,7,9,11,<br>14,15,16 | 4  | P01681,P47967,P97840,Q9R168                                                                       |
| 3235 | 1,3,4,5,8,1<br>0,12,14 | 2,6,7,9,11,<br>13,15,16 | 2  | P01681,Q5RLM2                                                                                     |
| 3236 | 1,3,4,5,8,1<br>0,12,15 | 2,6,7,9,11,<br>13,14,16 | 5  | P01681,P0DMW0;P0DMW1,P10758,P34901,Q9R168                                                         |
| 3237 | 1,3,4,5,8,1<br>0,12,16 | 2,6,7,9,11,<br>13,14,15 | 3  | P01681,P0DMW0;P0DMW1,P97840                                                                       |
| 3238 | 1,3,4,5,8,1<br>0,13,14 | 2,6,7,9,11,<br>12,15,16 | 2  | P01681,Q9WUW8                                                                                     |
| 3239 | 1,3,4,5,8,1<br>0,13,15 | 2,6,7,9,11,<br>12,14,16 | 2  | P01681,P62804                                                                                     |
| 3240 | 1,3,4,5,8,1<br>0,13,16 | 2,6,7,9,11,<br>12,14,15 | 5  | O35077,P01681,P46844,Q8R431,Q9WUW8                                                                |
| 3241 | 1,3,4,5,8,1<br>0,14,15 | 2,6,7,9,11,<br>12,13,16 | 2  | P01681,P54921                                                                                     |
| 3242 | 1,3,4,5,8,1<br>0,14,16 | 2,6,7,9,11,<br>12,13,15 | 3  | O35077,P01681,Q9WUW8                                                                              |
| 3243 | 1,3,4,5,8,1<br>0,15,16 | 2,6,7,9,11,<br>12,13,14 | 10 | O35077,P01681,P19468,P48508,P53790,Q63270,Q63424,Q64093,Q6Q0N1,Q8R431                             |
| 3244 | 1,3,4,5,8,1<br>1,12,13 | 2,6,7,9,10,<br>14,15,16 | 11 | P01681,P47967,P97840,Q4FZU2,Q5I0D1,Q6IFU7,Q6IFW6,Q6IG02,Q6IMF3,Q6P6Q2,Q811M5                      |
| 3245 | 1,3,4,5,8,1<br>1,12,14 | 2,6,7,9,10,<br>13,15,16 | 9  | D3ZUC6,P01681,Q4FZU2,Q6IFU7,Q6IFW6,Q6IG02,Q6IMF3,Q6P6Q2,Q811M5                                    |
| 3246 | 1,3,4,5,8,1<br>1,12,15 | 2,6,7,9,10,<br>13,14,16 | 11 | P01681,P97840,Q4FZU2,Q6IFU7,Q6IFU8,Q6IFW6,Q6IG02,Q6IG05,Q6IMF3,Q6P6Q2,Q9R168                      |
| 3247 | 1,3,4,5,8,1<br>1,12,16 | 2,6,7,9,10,<br>13,14,15 | 14 | O88797,P00762,P01681,P01835,P02782,P08010,P36374,P97840,Q4FZU2,Q6IFU7,Q6IFW6,Q6IG02,Q6IMF3,Q6P6Q2 |
| 3248 | 1,3,4,5,8,1<br>1,13,14 | 2,6,7,9,10,<br>12,15,16 | 10 | B0BNN3,O54728,P01681,Q4FZU2,Q6IFU7,Q6IFW6,Q6IG02,Q6IMF3,Q6P6Q2,Q811M5                             |
| 3249 | 1,3,4,5,8,1<br>1,13,15 | 2,6,7,9,10,<br>12,14,16 | 8  | P01681,Q4FZU2,Q6IFU7,Q6IFU8,Q6IFW6,Q6IG02,Q6IMF3,Q6P6Q2                                           |
| 3250 | 1,3,4,5,8,1<br>1,13,16 | 2,6,7,9,10,<br>12,14,15 | 11 | B0BNN3,P00762,P01681,P02782,P30120,Q4FZU2,Q6IFU7,Q6IFW6,Q6IG02,Q6IMF3,Q6P6Q2                      |
| 3251 | 1,3,4,5,8,1<br>1,14,15 | 2,6,7,9,10,<br>12,13,16 | 9  | D3ZUC6,P01681,Q4FZU2,Q6IFU7,Q6IFU8,Q6IFW6,Q6IG02,Q6IMF3,Q6P6Q2                                    |

|      |                        |                         |    |                                                                                            |
|------|------------------------|-------------------------|----|--------------------------------------------------------------------------------------------|
| 3252 | 1,3,4,5,8,1<br>1,14,16 | 2,6,7,9,10,<br>12,13,15 | 13 | O54728,O88797,P00762,P01681,P02782,P08649,Q4FZU2,Q6IFU7,Q6IFU8,Q6IFW6,Q6IG02,Q6IMF3,Q6P6Q2 |
| 3253 | 1,3,4,5,8,1<br>1,15,16 | 2,6,7,9,10,<br>12,13,14 | 12 | O88797,P00762,P01681,P29315,Q10758,Q4FZU2,Q6IFU7,Q6IFU8,Q6IFW6,Q6IG02,Q6IMF3,Q6P6Q2        |
| 3254 | 1,3,4,5,8,1<br>2,13,14 | 2,6,7,9,10,<br>11,15,16 | 4  | D3ZUC6,P01681,P20766,Q811M5                                                                |
| 3255 | 1,3,4,5,8,1<br>2,13,15 | 2,6,7,9,10,<br>11,14,16 | 3  | P01681,P97840,Q9R168                                                                       |
| 3256 | 1,3,4,5,8,1<br>2,13,16 | 2,6,7,9,10,<br>11,14,15 | 2  | P00762,P97840                                                                              |
| 3257 | 1,3,4,5,8,1<br>2,14,15 | 2,6,7,9,10,<br>11,13,16 | 3  | D3ZUC6,P01681,Q9R168                                                                       |
| 3258 | 1,3,4,5,8,1<br>2,14,16 | 2,6,7,9,10,<br>11,13,15 | 2  | P00762,P01681                                                                              |
| 3259 | 1,3,4,5,8,1<br>2,15,16 | 2,6,7,9,10,<br>11,13,14 | 3  | P00762,P01681,Q9R168                                                                       |
| 3260 | 1,3,4,5,8,1<br>3,14,15 | 2,6,7,9,10,<br>11,12,16 | 3  | B0BNN3,D3ZUC6,P01681                                                                       |
| 3261 | 1,3,4,5,8,1<br>3,14,16 | 2,6,7,9,10,<br>11,12,15 | 6  | B0BNN3,O35077,O54728,P00762,Q99MH3,Q9WUW8                                                  |
| 3262 | 1,3,4,5,8,1<br>3,15,16 | 2,6,7,9,10,<br>11,12,14 | 3  | O35077,P00762,P01681                                                                       |
| 3263 | 1,3,4,5,8,1<br>4,15,16 | 2,6,7,9,10,<br>11,12,13 | 2  | O35077,P01681                                                                              |
| 3264 | 1,3,4,5,9,1<br>0,11,12 | 2,6,7,8,13,<br>14,15,16 | 3  | P01835,Q03191,Q62714                                                                       |
| 3265 | 1,3,4,5,9,1<br>0,11,13 | 2,6,7,8,12,<br>14,15,16 | 0  |                                                                                            |
| 3266 | 1,3,4,5,9,1<br>0,11,14 | 2,6,7,8,12,<br>13,15,16 | 0  |                                                                                            |
| 3267 | 1,3,4,5,9,1<br>0,11,15 | 2,6,7,8,12,<br>13,14,16 | 5  | P01681,Q4FZU2,Q6IFW6,Q6IG02,Q6P6Q2                                                         |
| 3268 | 1,3,4,5,9,1<br>0,11,16 | 2,6,7,8,12,<br>13,14,15 | 0  |                                                                                            |
| 3269 | 1,3,4,5,9,1<br>0,12,13 | 2,6,7,8,11,<br>14,15,16 | 2  | P50280,Q9QZK9                                                                              |
| 3270 | 1,3,4,5,9,1<br>0,12,14 | 2,6,7,8,11,<br>13,15,16 | 2  | P09456,P30120                                                                              |
| 3271 | 1,3,4,5,9,1<br>0,12,15 | 2,6,7,8,11,<br>13,14,16 | 7  | P01681,P09456,P10758,P30120,P46462,Q00715,Q99041                                           |

|      |                        |                         |                                                                  |
|------|------------------------|-------------------------|------------------------------------------------------------------|
| 3272 | 1,3,4,5,9,1<br>0,12,16 | 2,6,7,8,11,<br>13,14,15 | 0                                                                |
| 3273 | 1,3,4,5,9,1<br>0,13,14 | 2,6,7,8,11,<br>12,15,16 | 2 P12020,Q00715                                                  |
| 3274 | 1,3,4,5,9,1<br>0,13,15 | 2,6,7,8,11,<br>12,14,16 | 6 P12020,P30120,P46462,P62804,Q00715,Q8CFN2                      |
| 3275 | 1,3,4,5,9,1<br>0,13,16 | 2,6,7,8,11,<br>12,14,15 | 2 P11883,P12020                                                  |
| 3276 | 1,3,4,5,9,1<br>0,14,15 | 2,6,7,8,11,<br>12,13,16 | 7 P01681,P09456,P12020,P30120,P46462,P62804,Q00715               |
| 3277 | 1,3,4,5,9,1<br>0,14,16 | 2,6,7,8,11,<br>12,13,15 | 1 P12020                                                         |
| 3278 | 1,3,4,5,9,1<br>0,15,16 | 2,6,7,8,11,<br>12,13,14 | 1 P12020                                                         |
| 3279 | 1,3,4,5,9,1<br>1,12,13 | 2,6,7,8,10,<br>14,15,16 | 2 Q03191,Q62761;Q62762;Q62763                                    |
| 3280 | 1,3,4,5,9,1<br>1,12,14 | 2,6,7,8,10,<br>13,15,16 | 3 P02631,Q03191,Q62761;Q62762;Q62763                             |
| 3281 | 1,3,4,5,9,1<br>1,12,15 | 2,6,7,8,10,<br>13,14,16 | 7 P01681,P02631,Q4FZU2,Q62761;Q62762;Q62763,Q6IFW6,Q6IG02,Q6P6Q2 |
| 3282 | 1,3,4,5,9,1<br>1,12,16 | 2,6,7,8,10,<br>13,14,15 | 2 P02631,Q03191                                                  |
| 3283 | 1,3,4,5,9,1<br>1,13,14 | 2,6,7,8,10,<br>12,15,16 | 3 P02631,P20766,Q63598                                           |
| 3284 | 1,3,4,5,9,1<br>1,13,15 | 2,6,7,8,10,<br>12,14,16 | 6 P02631,P62804,Q4FZU2,Q6IFW6,Q6IG02,Q6P6Q2                      |
| 3285 | 1,3,4,5,9,1<br>1,13,16 | 2,6,7,8,10,<br>12,14,15 | 0                                                                |
| 3286 | 1,3,4,5,9,1<br>1,14,15 | 2,6,7,8,10,<br>12,13,16 | 6 P01681,P02631,Q4FZU2,Q6IFW6,Q6IG02,Q6P6Q2                      |
| 3287 | 1,3,4,5,9,1<br>1,14,16 | 2,6,7,8,10,<br>12,13,15 | 1 P02631                                                         |
| 3288 | 1,3,4,5,9,1<br>1,15,16 | 2,6,7,8,10,<br>12,13,14 | 8 P01681,P02631,P25809,P29315,Q4FZU2,Q6IFW6,Q6IG02,Q6P6Q2        |
| 3289 | 1,3,4,5,9,1<br>2,13,14 | 2,6,7,8,10,<br>11,15,16 | 2 P20766,P50280                                                  |
| 3290 | 1,3,4,5,9,1<br>2,13,15 | 2,6,7,8,10,<br>11,14,16 | 2 P62804,Q00715                                                  |
| 3291 | 1,3,4,5,9,1<br>2,13,16 | 2,6,7,8,10,<br>11,14,15 | 0                                                                |

|      |                         |                         |   |                                           |
|------|-------------------------|-------------------------|---|-------------------------------------------|
| 3292 | 1,3,4,5,9,1<br>2,14,15  | 2,6,7,8,10,<br>11,13,16 | 5 | P01681,P02631,P09456,P30120,Q00715        |
| 3293 | 1,3,4,5,9,1<br>2,14,16  | 2,6,7,8,10,<br>11,13,15 | 1 | Q68G31                                    |
| 3294 | 1,3,4,5,9,1<br>2,15,16  | 2,6,7,8,10,<br>11,13,14 | 3 | P02631,P25809,Q68G31                      |
| 3295 | 1,3,4,5,9,1<br>3,14,15  | 2,6,7,8,10,<br>11,12,16 | 5 | P02631,P12020,P20766,P62804,Q00715        |
| 3296 | 1,3,4,5,9,1<br>3,14,16  | 2,6,7,8,10,<br>11,12,15 | 0 |                                           |
| 3297 | 1,3,4,5,9,1<br>3,15,16  | 2,6,7,8,10,<br>11,12,14 | 3 | P12020,P62804,Q00715                      |
| 3298 | 1,3,4,5,9,1<br>4,15,16  | 2,6,7,8,10,<br>11,12,13 | 2 | P02631,P12020                             |
| 3299 | 1,3,4,5,10,<br>11,12,13 | 2,6,7,8,9,1<br>4,15,16  | 3 | P47967,P97840,Q5I0D1                      |
| 3300 | 1,3,4,5,10,<br>11,12,14 | 2,6,7,8,9,1<br>3,15,16  | 0 |                                           |
| 3301 | 1,3,4,5,10,<br>11,12,15 | 2,6,7,8,9,1<br>3,14,16  | 5 | P97840,Q4FZU2,Q6IFW6,Q6IG02,Q6P6Q2        |
| 3302 | 1,3,4,5,10,<br>11,12,16 | 2,6,7,8,9,1<br>3,14,15  | 1 | P97840                                    |
| 3303 | 1,3,4,5,10,<br>11,13,14 | 2,6,7,8,9,1<br>2,15,16  | 0 |                                           |
| 3304 | 1,3,4,5,10,<br>11,13,15 | 2,6,7,8,9,1<br>2,14,16  | 5 | P97840,Q4FZU2,Q6IFW6,Q6IG02,Q6P6Q2        |
| 3305 | 1,3,4,5,10,<br>11,13,16 | 2,6,7,8,9,1<br>2,14,15  | 1 | P97840                                    |
| 3306 | 1,3,4,5,10,<br>11,14,15 | 2,6,7,8,9,1<br>2,13,16  | 4 | Q4FZU2,Q6IFW6,Q6IG02,Q6P6Q2               |
| 3307 | 1,3,4,5,10,<br>11,14,16 | 2,6,7,8,9,1<br>2,13,15  | 0 |                                           |
| 3308 | 1,3,4,5,10,<br>11,15,16 | 2,6,7,8,9,1<br>2,13,14  | 6 | P29315,Q4FZU2,Q6IFW6,Q6IG02,Q6IMF3,Q6P6Q2 |
| 3309 | 1,3,4,5,10,<br>12,13,14 | 2,6,7,8,9,1<br>1,15,16  | 0 |                                           |
| 3310 | 1,3,4,5,10,<br>12,13,15 | 2,6,7,8,9,1<br>1,14,16  | 4 | P09456,P62804,P97840,Q812E4               |
| 3311 | 1,3,4,5,10,<br>12,13,16 | 2,6,7,8,9,1<br>1,14,15  | 2 | P0DMW0;P0DMW1,P97840                      |

|      |                                             |                                                           |
|------|---------------------------------------------|-----------------------------------------------------------|
| 3312 | 1,3,4,5,10, 2,6,7,8,9,1<br>12,14,15 1,13,16 | 3 P09456,P30120,Q812E4                                    |
| 3313 | 1,3,4,5,10, 2,6,7,8,9,1<br>12,14,16 1,13,15 | 0                                                         |
| 3314 | 1,3,4,5,10, 2,6,7,8,9,1<br>12,15,16 1,13,14 | 3 P0DMW0;P0DMW1,P10758,P97840                             |
| 3315 | 1,3,4,5,10, 2,6,7,8,9,1<br>13,14,15 1,12,16 | 5 P09456,P12020,P62804,Q00715,Q812E4                      |
| 3316 | 1,3,4,5,10, 2,6,7,8,9,1<br>13,14,16 1,12,15 | 1 Q99MH3                                                  |
| 3317 | 1,3,4,5,10, 2,6,7,8,9,1<br>13,15,16 1,12,14 | 3 O35077,P11883,P12020                                    |
| 3318 | 1,3,4,5,10, 2,6,7,8,9,1<br>14,15,16 1,12,13 | 0                                                         |
| 3319 | 1,3,4,5,11, 2,6,7,8,9,1<br>12,13,14 0,15,16 | 2 P20766,Q811M5                                           |
| 3320 | 1,3,4,5,11, 2,6,7,8,9,1<br>12,13,15 0,14,16 | 5 P97840,Q4FZU2,Q6IFW6,Q6IG02,Q6P6Q2                      |
| 3321 | 1,3,4,5,11, 2,6,7,8,9,1<br>12,13,16 0,14,15 | 2 P47967,P97840                                           |
| 3322 | 1,3,4,5,11, 2,6,7,8,9,1<br>12,14,15 0,13,16 | 6 P02631,P20766,Q4FZU2,Q6IFW6,Q6IG02,Q6P6Q2               |
| 3323 | 1,3,4,5,11, 2,6,7,8,9,1<br>12,14,16 0,13,15 | 1 P02631                                                  |
| 3324 | 1,3,4,5,11, 2,6,7,8,9,1<br>12,15,16 0,13,14 | 8 P02631,P29315,P97840,Q4FZU2,Q6IFW6,Q6IG02,Q6IMF3,Q6P6Q2 |
| 3325 | 1,3,4,5,11, 2,6,7,8,9,1<br>13,14,15 0,12,16 | 6 P02631,P20766,Q4FZU2,Q6IFW6,Q6IG02,Q6P6Q2               |
| 3326 | 1,3,4,5,11, 2,6,7,8,9,1<br>13,14,16 0,12,15 | 3 B0BNN3,O54728,Q99MH3                                    |
| 3327 | 1,3,4,5,11, 2,6,7,8,9,1<br>13,15,16 0,12,14 | 5 P29315,Q4FZU2,Q6IFW6,Q6IG02,Q6P6Q2                      |
| 3328 | 1,3,4,5,11, 2,6,7,8,9,1<br>14,15,16 0,12,13 | 7 P02631,P29315,Q4FZU2,Q6IFW6,Q6IG02,Q6IMF3,Q6P6Q2        |
| 3329 | 1,3,4,5,12, 2,6,7,8,9,1<br>13,14,15 0,11,16 | 1 P20766                                                  |
| 3330 | 1,3,4,5,12, 2,6,7,8,9,1<br>13,14,16 0,11,15 | 3 P20766,Q6P6S4,Q99MH3                                    |
| 3331 | 1,3,4,5,12, 2,6,7,8,9,1<br>13,15,16 0,11,14 | 1 P97840                                                  |



|      |                         |                               |    |                                                                                                                                                                                                                                                                           |
|------|-------------------------|-------------------------------|----|---------------------------------------------------------------------------------------------------------------------------------------------------------------------------------------------------------------------------------------------------------------------------|
| 3332 | 1,3,4,5,12,<br>14,15,16 | 2,6,7,8,9,1<br>0,11,13        | 1  | P02631                                                                                                                                                                                                                                                                    |
| 3333 | 1,3,4,5,13,<br>14,15,16 | 2,6,7,8,9,1<br>0,11,12        | 1  | P20766                                                                                                                                                                                                                                                                    |
| 3334 | 1,3,4,6,7,8<br>,9,10    | 2,5,11,12,<br>13,14,15,1<br>6 | 16 | O35763,O70417,O70594,P01681,P06761,P18418,P19629,P20646,P23739,P70545,Q5QE79,Q63598,Q63618,Q6P6R2,Q923S2,Q9R0T3                                                                                                                                                           |
| 3335 | 1,3,4,6,7,8<br>,9,11    | 2,5,10,12,<br>13,14,15,1<br>6 | 38 | O70417,P01681,P02780,P02781,P02782,P06761,P06911,P07150,P07647,P08723,P0C0A9,P11598,P20646,P22273,P22282,P22283,P35280,P36374,P40241,P46462,P50280,Q5GRG2,Q5M8C6,Q5QE79,Q62902,Q62946,Q63493,Q63617,Q63751,Q6AYR9,Q6P6R2,Q6P6S4,Q6Q7Y5,Q812E4,Q9JHB9,Q9JI85,Q9QW07,Q9R0T3 |
| 3336 | 1,3,4,6,7,8<br>,9,12    | 2,5,10,11,<br>13,14,15,1<br>6 | 7  | O70417,P01681,P06761,P06911,Q5QE79,Q62946,Q9R0T3                                                                                                                                                                                                                          |
| 3337 | 1,3,4,6,7,8<br>,9,13    | 2,5,10,11,<br>12,14,15,1<br>6 | 11 | O70417,P01681,P06761,P06911,P20646,Q5QE79,Q62902,Q62946,Q6P6R2,Q9JI85,Q9R0T3                                                                                                                                                                                              |
| 3338 | 1,3,4,6,7,8<br>,9,14    | 2,5,10,11,<br>12,13,15,1<br>6 | 9  | O70417,P01681,P06761,P06911,P08937,P20646,Q5QE79,Q63751,Q6P6R2                                                                                                                                                                                                            |
| 3339 | 1,3,4,6,7,8<br>,9,15    | 2,5,10,11,<br>12,13,14,1<br>6 | 8  | O70417,P01681,P02091,P19629,P20646,P35280,Q6P6R2,Q9Z0V6                                                                                                                                                                                                                   |
| 3340 | 1,3,4,6,7,8<br>,9,16    | 2,5,10,11,<br>12,13,14,1<br>5 | 19 | O70417,P01681,P02780,P02781,P02782,P02783,P06761,P06911,P07647,P18418,P19629,P20646,P20761,P22006,P23593,Q5M8C6,Q62902,Q9JHB9,Q9R0T3                                                                                                                                      |
| 3341 | 1,3,4,6,7,8<br>,10,11   | 2,5,9,12,1<br>3,14,15,16      | 36 | O70417,P02780,P02781,P02782,P06761,P06911,P07647,P08723,P0C0A9,P11598,P18418,P18757,P19629,P22273,P22282,P22283,P30904,P36374,P40241,P46462,P50280,Q4G063,Q5GRG2,Q5M7T9,Q5M8C6,Q62902,Q63493,Q63617,Q6B345,Q6P6R2,Q99041,Q9JHB9,Q9JI85,Q9QW07,Q9R0T3,Q9WTW7               |
| 3342 | 1,3,4,6,7,8<br>,10,12   | 2,5,9,11,1<br>3,14,15,16      | 30 | O35763,O70377,O70417,P06761,P06911,P18418,P19629,P30904,P46844,P48508,P53790,P57113,Q03248,Q05175,Q3ZAV1,Q5M7T9,Q5RLM2,Q63270,Q63598,Q63618,Q66HG3,Q6MG61,Q6Q0N1,Q80W57,Q8R431,Q923S2,Q923V8,Q9JJ40,Q9R0T3,Q9WTW7                                                         |
| 3343 | 1,3,4,6,7,8<br>,10,13   | 2,5,9,11,1<br>2,14,15,16      | 35 | O55004,O70257,O70377,O70417,O70594,P02631,P06761,P06911,P18418,P19468,P19629,P30904,P36860,P46844,P48508,P51907,P53790,P57113,P70549,Q3ZAV1,Q5M7T9,Q63424,Q63598,Q63618,Q64093,Q66HG3,Q6MG61,Q6Q0N1,Q80W57,Q8R431,Q9JI85,Q9R0T3,Q9WTW7,Q9WUW9,Q9Z0W7                      |
| 3344 | 1,3,4,6,7,8<br>,10,14   | 2,5,9,11,1<br>2,13,15,16      | 32 | O70257,O70377,O70417,O70594,P06761,P06911,P08937,P18418,P18757,P19629,P20761,P46844,P48508,P53790,P54921,P57113,P63081,P97580,Q03248,Q05175,Q5M7T9,Q5QE79,Q5RLM2,Q63424,Q63598,Q63751,Q64602,Q66HG3,Q6Q0N1,Q923S2,Q9WUW8,Q9WUW9                                           |

3345 1,3,4,6,7,8 2,5,9,11,1  
,10,15 2,13,14,16

3346 1,3,4,6,7,8 2,5,9,11,1  
,10,16 2,13,14,15

3347 1,3,4,6,7,8 2,5,9,10,1  
,11,12 3,14,15,16

3348 1,3,4,6,7,8 2,5,9,10,1  
,11,13 2,14,15,16

3349 1,3,4,6,7,8 2,5,9,10,1  
,11,14 2,13,15,16

3350 1,3,4,6,7,8 2,5,9,10,1  
,11,15 2,13,14,16

3351 1,3,4,6,7,8 2,5,9,10,1  
,11,16 2,13,14,15

3352 1,3,4,6,7,8 2,5,9,10,1  
,12,13 1,14,15,16

3353 1,3,4,6,7,8 2,5,9,10,1  
,12,14 1,13,15,16

3354 1,3,4,6,7,8 2,5,9,10,1  
,12,15 1,13,14,16

3355 1,3,4,6,7,8 2,5,9,10,1  
,12,16 1,13,14,15

O35763,O70257,O70377,O70417,O70594,O88339;Q4V882,P01681,P02091,P06761,P08721,P10758,P18418,P18757,P19468,P19629,P20646,P20761,P29975,P30904,P38918,P46844,P48508,P552 1907,P53790,P54921,P57113,P68035;P68136,Q03248,Q05175,Q3MIE4,Q3ZAV1,Q5I0E9,Q5M7T9,Q5RKI1,Q63270,Q63424,Q63598,Q63618,Q64093,Q64602,Q6AY41,Q6MG61,Q6Q0N1,Q80W57,Q8R431,Q923S2,Q99MZ8,Q9JJ40,Q9JLJ3,Q9R1T5,Q9WTW7,Q9ZOW7  
O35077,O35763,O55004,O70257,O70377,O70417,O70594,P02780,P02781,P02782,P02783,P06761,P06911,P07151,P07647,P15399,P18418,P18757,P19468,P19629,P20646,P20761,P22282,P22283,P23928,P28570,P29975,P38918,P46720,P46844,P48508,P51907,P53790,P57113,P60711;P72 63259,P68035;P68136,P97580,Q03248,Q05175,Q30KJ2,Q3T1J9,Q3ZAV1,Q5I0E9,Q5M7T9,Q5M8C6,Q62687,Q63270,Q63424,Q63598,Q63618,Q64093,Q64319,Q64602,Q66HG3,Q68FT5,Q6AY33,Q6AY41,Q6MG61,Q6Q0N1,Q71MB6,Q80W57,Q8R431,Q923S2,Q9JHB9,Q9JJ40,Q9JLJ3,Q9QYU4,Q9R0T3,Q9R1T5,Q9WTW7,Q9WUW9,Q9ZOW7  
O35547,O70417,P02780,P02781,P02782,P04905,P06761,P06911,P07647,P08723,P0C0A9,P11598,P12020,P19629,P22273,P22282,P22283,P36374,P40241,P46462,P50280,P70709,P97840,Q5GRG2,Q5I0D1,Q5M8C6,Q62902,Q62946,Q63493,Q63617,Q99041,Q9JHB9,Q9JI85,Q9QW07,Q9R0T3  
B0BNN3,P02780,P02781,P02782,P06761,P06911,P07647,P08723,P0C0A9,P11598,P12020,P22273,P22282,P22283,P36374,P40241,P46462,P50280,Q4G063,Q5GRG2,Q5M8C6,Q62902,Q62946,Q63493,Q63617,Q6AYR9,Q99041,Q9JHB9,Q9JI85,Q9R0T3  
B0BNN3,O70417,P02780,P02781,P02782,P02783,P06761,P06911,P07150,P07647,P08723,P08937,P0C0A9,P11598,P12020,P22273,P22282,P22283,P36374,P40241,P46462,P50280,Q4G063,Q4G075,Q5GRG2,Q5M8C6,Q5QE79,Q62902,Q63493,Q63617,Q63751,Q6AYR9,Q812E4,Q99041,Q9JHB9,Q9JI85,Q9QW07,Q9R0T3  
P01681,P02091,P02780,P02781,P02782,P06761,P06911,P07647,P08721,P08723,P0C0A9,P11598,P19629,P22273,P22282,P22283,P36374,P40241,P46462,P50280,Q4FZU2,Q4G063,Q5GRG2,Q5M8C6,Q62902,Q63493,Q63617,Q6AYR9,Q6IFU7,Q6IFU8,Q6IFW6,Q6IG02,Q6IMF3,Q6P6Q2,Q6P6S4,Q6Q0N0,Q8CJ52,Q99041,Q9JHB9,Q9JI85,Q9QW07,Q9R0T3  
O35547,P00762,P02780,P02781,P02782,P02783,P04905,P05369,P06761,P06911,P07647,P08010,P08723,P09456,P0C0A9,P11598,P12020,P18418,P19629,P20761,P22006,P22273,P22282,P22283,P24368,P30120,P36374,P40241,P46462,P50280,P60905,Q4G063,Q5GRG2,Q5M8C6,Q62902,Q63493,Q63617,Q6Q0N0,Q812E4,Q8CFN2,Q99041,Q9JHB9,Q9JI85,Q9QW07,Q9QZK8,Q9QZK9,Q9R0T3  
10 O70417,P06761,P06911,P22282,P70549,P97840,Q62946,Q9JI85,Q9R0T3,Q9Z2L0  
8 O70417,P06761,P06911,P08937,Q5QE79,Q5RLM2,Q63751,Q9Z2L0  
8 O70417,P02091,P06761,P06911,P10758,P19629,P70549,Q63598  
22 O70417,P02780,P02781,P02782,P02783,P06761,P06911,P07151,P07647,P19629,P20761,P22282,P22283,P46844,P57113,Q03248,Q5M8C6,Q63598,Q9JHB9,Q9JI85,Q9R0T3,Q9WTW7

|      |                       |                          |    |                                                                                                                                                                                                                                                                                                                     |
|------|-----------------------|--------------------------|----|---------------------------------------------------------------------------------------------------------------------------------------------------------------------------------------------------------------------------------------------------------------------------------------------------------------------|
| 3356 | 1,3,4,6,7,8<br>,13,14 | 2,5,9,10,1<br>1,12,15,16 | 13 | B0BNN3,O70417,P06761,P06911,P08937,P20761,P63081,P70549,Q5QE79,Q63751,Q9JI85,Q9WUW8,Q9Z2L0                                                                                                                                                                                                                          |
| 3357 | 1,3,4,6,7,8<br>,13,15 | 2,5,9,10,1<br>1,12,14,16 | 10 | O70257,O70594,P02091,P06761,P06911,P19629,P70549,Q6Q0N1,Q9JI85,Q9Z2L0                                                                                                                                                                                                                                               |
| 3358 | 1,3,4,6,7,8<br>,13,16 | 2,5,9,10,1<br>1,12,14,15 | 32 | B0BNN3,O70257,O70594,P00762,P02780,P02781,P02782,P02783,P06761,P06911,P07151,P07647,P11598,P18418,P19468,P20761,P22006,P22282,P22283,P30120,P46844,P57113,Q5M7T9,Q5M8C6,Q62902,Q63424,Q6Q0N1,Q9JHB9,Q9JI85,Q9R0T3,Q9WUW8,Q9Z2L0                                                                                     |
| 3359 | 1,3,4,6,7,8<br>,14,15 | 2,5,9,10,1<br>1,12,13,16 | 12 | O70417,P02091,P02783,P06761,P06911,P19629,P20646,P20761,P54921,Q5QE79,Q63751,Q9Z2L0                                                                                                                                                                                                                                 |
| 3360 | 1,3,4,6,7,8<br>,14,16 | 2,5,9,10,1<br>1,12,13,15 | 23 | B0BNN3,O70417,P02780,P02781,P02782,P02783,P06761,P06911,P07151,P07647,P20761,P22006,P22283,P46844,P57113,P63081,Q5M8C6,Q5QE79,Q63751,Q923S2,Q9JHB9,Q9WUW8,Q9Z2L0                                                                                                                                                    |
| 3361 | 1,3,4,6,7,8<br>,15,16 | 2,5,9,10,1<br>1,12,13,14 | 44 | O35077,O70257,O70377,O70594,P02091,P02781,P02782,P02783,P06761,P06911,P07151,P07647,P08721,P09606,P17988,P19468,P19629,P20646,P20761,P22006,P46844,P48508,P50280,P53790,P57113,Q03248,Q05175,Q3ZAV1,Q5M7T9,Q5M8C6,Q63270,Q63424,Q63598,Q64093,Q6MG61,Q6Q0N1,Q80W57,Q8CJ52,Q8R431,Q923S2,Q9JHB9,Q9R1T5,Q9WTW7,Q9Z0W7 |
| 3362 | 1,3,4,6,7,9<br>,10,11 | 2,5,8,12,1<br>3,14,15,16 | 2  | P11598,Q63617                                                                                                                                                                                                                                                                                                       |
| 3363 | 1,3,4,6,7,9<br>,10,12 | 2,5,8,11,1<br>3,14,15,16 | 0  |                                                                                                                                                                                                                                                                                                                     |
| 3364 | 1,3,4,6,7,9<br>,10,13 | 2,5,8,11,1<br>2,14,15,16 | 0  |                                                                                                                                                                                                                                                                                                                     |
| 3365 | 1,3,4,6,7,9<br>,10,14 | 2,5,8,11,1<br>2,13,15,16 | 3  | O70417,Q5QE79,Q63751                                                                                                                                                                                                                                                                                                |
| 3366 | 1,3,4,6,7,9<br>,10,15 | 2,5,8,11,1<br>2,13,14,16 | 5  | P02091,P08721,P10758,Q5RKI1,Q8K1G0                                                                                                                                                                                                                                                                                  |
| 3367 | 1,3,4,6,7,9<br>,10,16 | 2,5,8,11,1<br>2,13,14,15 | 3  | P02783,P22006,Q8K1G0                                                                                                                                                                                                                                                                                                |
| 3368 | 1,3,4,6,7,9<br>,11,12 | 2,5,8,10,1<br>3,14,15,16 | 4  | P11598,P22283,Q63493,Q63617                                                                                                                                                                                                                                                                                         |
| 3369 | 1,3,4,6,7,9<br>,11,13 | 2,5,8,10,1<br>2,14,15,16 | 3  | P11598,P22283,Q63617                                                                                                                                                                                                                                                                                                |
| 3370 | 1,3,4,6,7,9<br>,11,14 | 2,5,8,10,1<br>2,13,15,16 | 4  | P11598,Q5QE79,Q63617,Q63751                                                                                                                                                                                                                                                                                         |
| 3371 | 1,3,4,6,7,9<br>,11,15 | 2,5,8,10,1<br>2,13,14,16 | 4  | P02091,P08721,Q63617,Q8CJ52                                                                                                                                                                                                                                                                                         |
| 3372 | 1,3,4,6,7,9<br>,11,16 | 2,5,8,10,1<br>2,13,14,15 | 13 | P02780,P02781,P02783,P07647,P08723,P0C0A9,P11598,P22006,P22283,Q62902,Q63617,Q9JHB9,Q9QW07                                                                                                                                                                                                                          |
| 3373 | 1,3,4,6,7,9<br>,12,13 | 2,5,8,10,1<br>1,14,15,16 | 0  |                                                                                                                                                                                                                                                                                                                     |

|      |                        |                          |    |                                                                                                |
|------|------------------------|--------------------------|----|------------------------------------------------------------------------------------------------|
| 3374 | 1,3,4,6,7,9<br>,12,14  | 2,5,8,10,1<br>1,13,15,16 | 2  | O70417,Q63751                                                                                  |
| 3375 | 1,3,4,6,7,9<br>,12,15  | 2,5,8,10,1<br>1,13,14,16 | 2  | P02091,P10758                                                                                  |
| 3376 | 1,3,4,6,7,9<br>,12,16  | 2,5,8,10,1<br>1,13,14,15 | 2  | P02783,P22006                                                                                  |
| 3377 | 1,3,4,6,7,9<br>,13,14  | 2,5,8,10,1<br>1,12,15,16 | 1  | Q5QE79                                                                                         |
| 3378 | 1,3,4,6,7,9<br>,13,15  | 2,5,8,10,1<br>1,12,14,16 | 4  | P02091,P62804,P70549,Q00715                                                                    |
| 3379 | 1,3,4,6,7,9<br>,13,16  | 2,5,8,10,1<br>1,12,14,15 | 2  | P02783,P22006                                                                                  |
| 3380 | 1,3,4,6,7,9<br>,14,15  | 2,5,8,10,1<br>1,12,13,16 | 1  | P02091                                                                                         |
| 3381 | 1,3,4,6,7,9<br>,14,16  | 2,5,8,10,1<br>1,12,13,15 | 2  | P02783,P22006                                                                                  |
| 3382 | 1,3,4,6,7,9<br>,15,16  | 2,5,8,10,1<br>1,12,13,14 | 4  | P02091,P02783,P08721,P22006                                                                    |
| 3383 | 1,3,4,6,7,1<br>0,11,12 | 2,5,8,9,13,<br>14,15,16  | 4  | P11598,P22283,P47967,P97840                                                                    |
| 3384 | 1,3,4,6,7,1<br>0,11,13 | 2,5,8,9,12,<br>14,15,16  | 5  | P11598,P22283,P97840,Q63617,Q8CJD3                                                             |
| 3385 | 1,3,4,6,7,1<br>0,11,14 | 2,5,8,9,12,<br>13,15,16  | 3  | P11598,Q63751,Q8CJD3                                                                           |
| 3386 | 1,3,4,6,7,1<br>0,11,15 | 2,5,8,9,12,<br>13,14,16  | 9  | P02091,P08721,P11598,P17988,Q5RKI1,Q6IFW6,Q6IG02,Q8CJ52,Q8CJD3                                 |
| 3387 | 1,3,4,6,7,1<br>0,11,16 | 2,5,8,9,12,<br>13,14,15  | 12 | P02780,P02781,P02783,P07647,P08723,P0C0A9,P11598,P22006,P22283,Q63617,Q8CJD3,Q9JH<br>B9        |
| 3388 | 1,3,4,6,7,1<br>0,12,13 | 2,5,8,9,11,<br>14,15,16  | 3  | P70549,P97840,Q66HG3                                                                           |
| 3389 | 1,3,4,6,7,1<br>0,12,14 | 2,5,8,9,11,<br>13,15,16  | 2  | O70417,P57113                                                                                  |
| 3390 | 1,3,4,6,7,1<br>0,12,15 | 2,5,8,9,11,<br>13,14,16  | 4  | P02091,P10758,Q5RKI1,Q63598                                                                    |
| 3391 | 1,3,4,6,7,1<br>0,12,16 | 2,5,8,9,11,<br>13,14,15  | 12 | P02783,P0DMW0,P0DMW1,P10758,P18297,P46844,P57113,P97840,Q03248,Q63598,Q71MB6,<br>Q9JJ40,Q9WTW7 |
| 3392 | 1,3,4,6,7,1<br>0,13,14 | 2,5,8,9,11,<br>12,15,16  | 2  | P57113,P70549                                                                                  |
| 3393 | 1,3,4,6,7,1<br>0,13,15 | 2,5,8,9,11,<br>12,14,16  | 9  | P02091,P08721,P19468,P51792;P51794;P51796,P57113,P70549,Q5RKI1,Q63618,Q923M1                   |

|      |                        |                         |    |                                                                                                                                                                                                                   |
|------|------------------------|-------------------------|----|-------------------------------------------------------------------------------------------------------------------------------------------------------------------------------------------------------------------|
| 3394 | 1,3,4,6,7,1<br>0,13,16 | 2,5,8,9,11,<br>12,14,15 | 9  | P02783,P18297,P19468,P28570,P46844,P51792;P51794;P51796,P57113,Q63424,Q64093                                                                                                                                      |
| 3395 | 1,3,4,6,7,1<br>0,14,15 | 2,5,8,9,11,<br>12,13,16 | 5  | P01946,P02091,P54921,P57113,Q5RK11                                                                                                                                                                                |
| 3396 | 1,3,4,6,7,1<br>0,14,16 | 2,5,8,9,11,<br>12,13,15 | 7  | P02783,P18297,P46844,P57113,Q03248,Q71MB6,Q923S2                                                                                                                                                                  |
| 3397 | 1,3,4,6,7,1<br>0,15,16 | 2,5,8,9,11,<br>12,13,14 | 30 | O70377,O70594,P02091,P02783,P08721,P10758,P17988,P18297,P19468,P29975,P46844,P48508,P53790,P57113,Q03248,Q5I0E9,Q5M7T9,Q5RK11,Q63270,Q63424,Q63598,Q64093,Q6Q0N1,Q71MB6,Q80W57,Q8R431,Q923M1,Q9JJ40,Q9WTW7,Q9Z0W7 |
| 3398 | 1,3,4,6,7,1<br>1,12,13 | 2,5,8,9,10,<br>14,15,16 | 7  | P11598,P22283,P47967,P97840,Q5I0D1,Q63493,Q63617                                                                                                                                                                  |
| 3399 | 1,3,4,6,7,1<br>1,12,14 | 2,5,8,9,10,<br>13,15,16 | 3  | P11598,P22283,Q63751                                                                                                                                                                                              |
| 3400 | 1,3,4,6,7,1<br>1,12,15 | 2,5,8,9,10,<br>13,14,16 | 8  | P02091,P08721,P11598,P22283,P97840,Q6IFW6,Q6IG02,Q8CJ52                                                                                                                                                           |
| 3401 | 1,3,4,6,7,1<br>1,12,16 | 2,5,8,9,10,<br>13,14,15 | 18 | O35547,P02780,P02781,P02782,P02783,P05369,P07647,P08723,P0C0A9,P11598,P22006,P22283,P36374,P97840,Q63493,Q63617,Q9JHB9,Q9QW07                                                                                     |
| 3402 | 1,3,4,6,7,1<br>1,13,14 | 2,5,8,9,10,<br>12,15,16 | 5  | B0BNN3,P11598,P22283,Q63617,Q99041                                                                                                                                                                                |
| 3403 | 1,3,4,6,7,1<br>1,13,15 | 2,5,8,9,10,<br>12,14,16 | 8  | P02091,P08721,P11598,P22283,Q63617,Q6IG02,Q8CJ52,Q8CJD3                                                                                                                                                           |
| 3404 | 1,3,4,6,7,1<br>1,13,16 | 2,5,8,9,10,<br>12,14,15 | 17 | O35547,P00714,P02780,P02781,P02782,P02783,P05369,P07647,P08723,P0C0A9,P11598,P22006,P22283,Q62902,Q63617,Q99041,Q9JHB9                                                                                            |
| 3405 | 1,3,4,6,7,1<br>1,14,15 | 2,5,8,9,10,<br>12,13,16 | 5  | P02091,P02783,P11598,Q6IG02,Q8CJ52                                                                                                                                                                                |
| 3406 | 1,3,4,6,7,1<br>1,14,16 | 2,5,8,9,10,<br>12,13,15 | 13 | P02780,P02781,P02782,P02783,P07647,P08723,P0C0A9,P11598,P22006,P22283,Q63617,Q99041,Q9JHB9                                                                                                                        |
| 3407 | 1,3,4,6,7,1<br>1,15,16 | 2,5,8,9,10,<br>12,13,14 | 18 | P02091,P02780,P02781,P02783,P07647,P08721,P08723,P0C0A9,P11598,P17988,P22006,P22283,Q63617,Q6IFW6,Q6IG02,Q8CJ52,Q9JHB9,Q9QW07                                                                                     |
| 3408 | 1,3,4,6,7,1<br>2,13,14 | 2,5,8,9,10,<br>11,15,16 | 2  | P70549,Q9Z2L0                                                                                                                                                                                                     |
| 3409 | 1,3,4,6,7,1<br>2,13,15 | 2,5,8,9,10,<br>11,14,16 | 4  | P02091,P10758,P70549,P97840                                                                                                                                                                                       |
| 3410 | 1,3,4,6,7,1<br>2,13,16 | 2,5,8,9,10,<br>11,14,15 | 5  | P02783,P07647,P07943,P70549,P97840                                                                                                                                                                                |
| 3411 | 1,3,4,6,7,1<br>2,14,15 | 2,5,8,9,10,<br>11,13,16 | 1  | P02091                                                                                                                                                                                                            |
| 3412 | 1,3,4,6,7,1<br>2,14,16 | 2,5,8,9,10,<br>11,13,15 | 1  | P02783                                                                                                                                                                                                            |
| 3413 | 1,3,4,6,7,1<br>2,15,16 | 2,5,8,9,10,<br>11,13,14 | 4  | P02091,P02783,P10758,P17988                                                                                                                                                                                       |

|      |                        |                          |    |                                                                                                                                                    |
|------|------------------------|--------------------------|----|----------------------------------------------------------------------------------------------------------------------------------------------------|
| 3414 | 1,3,4,6,7,1<br>3,14,15 | 2,5,8,9,10,<br>11,12,16  | 3  | P02091,P70549,Q9Z2L0                                                                                                                               |
| 3415 | 1,3,4,6,7,1<br>3,14,16 | 2,5,8,9,10,<br>11,12,15  | 4  | B0BNN3,P02783,Q99MH3,Q9Z2L0                                                                                                                        |
| 3416 | 1,3,4,6,7,1<br>3,15,16 | 2,5,8,9,10,<br>11,12,14  | 4  | P02091,P02783,P08721,P70549                                                                                                                        |
| 3417 | 1,3,4,6,7,1<br>4,15,16 | 2,5,8,9,10,<br>11,12,13  | 3  | P02091,P02783,P17988                                                                                                                               |
| 3418 | 1,3,4,6,8,9<br>,10,11  | 2,5,7,12,1<br>3,14,15,16 | 4  | P01681,Q63493,Q6AY61,Q6P6S4                                                                                                                        |
| 3419 | 1,3,4,6,8,9<br>,10,12  | 2,5,7,11,1<br>3,14,15,16 | 2  | O70417,P01681                                                                                                                                      |
| 3420 | 1,3,4,6,8,9<br>,10,13  | 2,5,7,11,1<br>2,14,15,16 | 0  |                                                                                                                                                    |
| 3421 | 1,3,4,6,8,9<br>,10,14  | 2,5,7,11,1<br>2,13,15,16 | 4  | O70417,P01681,Q06000,Q63751                                                                                                                        |
| 3422 | 1,3,4,6,8,9<br>,10,15  | 2,5,7,11,1<br>2,13,14,16 | 3  | P01681,P02091,P62804                                                                                                                               |
| 3423 | 1,3,4,6,8,9<br>,10,16  | 2,5,7,11,1<br>2,13,14,15 | 4  | P01681,P02783,P22006,Q30KJ2                                                                                                                        |
| 3424 | 1,3,4,6,8,9<br>,11,12  | 2,5,7,10,1<br>3,14,15,16 | 10 | O88797,P01681,P06911,P09527,P61206;P84079,Q63493,Q6P6S4,Q6Q7Y5,Q9JI85,Q9QW07                                                                       |
| 3425 | 1,3,4,6,8,9<br>,11,13  | 2,5,7,10,1<br>2,14,15,16 | 5  | Q62902,Q63493,Q6AY61,Q6P6S4,Q9JI85                                                                                                                 |
| 3426 | 1,3,4,6,8,9<br>,11,14  | 2,5,7,10,1<br>2,13,15,16 | 7  | O70417,P01681,Q63751,Q6AY61,Q6P6S4,Q6Q7Y5,Q812E4                                                                                                   |
| 3427 | 1,3,4,6,8,9<br>,11,15  | 2,5,7,10,1<br>2,13,14,16 | 11 | P01681,P02091,Q4FZU2,Q63493,Q6AY61,Q6IFW6,Q6IG02,Q6IMF3,Q6P6Q2,Q6P6S4,Q9QW07                                                                       |
| 3428 | 1,3,4,6,8,9<br>,11,16  | 2,5,7,10,1<br>2,13,14,15 | 21 | O88797,P01681,P02780,P02781,P02782,P02783,P07647,P08723,P0C0A9,P22006,P30120,P60905,Q5M8C6,Q62902,Q63493,Q6AY61,Q6P6S4,Q812E4,Q9JHB9,Q9JI85,Q9QW07 |
| 3429 | 1,3,4,6,8,9<br>,12,13  | 2,5,7,10,1<br>1,14,15,16 | 1  | P70549                                                                                                                                             |
| 3430 | 1,3,4,6,8,9<br>,12,14  | 2,5,7,10,1<br>1,13,15,16 | 3  | O70417,P01681,Q63751                                                                                                                               |
| 3431 | 1,3,4,6,8,9<br>,12,15  | 2,5,7,10,1<br>1,13,14,16 | 2  | P01681,P02091                                                                                                                                      |
| 3432 | 1,3,4,6,8,9<br>,12,16  | 2,5,7,10,1<br>1,13,14,15 | 2  | P02783,P22006                                                                                                                                      |
| 3433 | 1,3,4,6,8,9<br>,13,14  | 2,5,7,10,1<br>1,12,15,16 | 1  | O70417                                                                                                                                             |

|      |                        |                          |                                                                                      |                                                                                                                 |
|------|------------------------|--------------------------|--------------------------------------------------------------------------------------|-----------------------------------------------------------------------------------------------------------------|
| 3434 | 1,3,4,6,8,9<br>,13,15  | 2,5,7,10,1<br>1,12,14,16 | 5                                                                                    | P01681,P02091,P62804,P70549,Q00715                                                                              |
| 3435 | 1,3,4,6,8,9<br>,13,16  | 2,5,7,10,1<br>1,12,14,15 | 3                                                                                    | P02783,P22006,P23593                                                                                            |
| 3436 | 1,3,4,6,8,9<br>,14,15  | 2,5,7,10,1<br>1,12,13,16 | 4                                                                                    | O70417,P01681,P02091,P23593                                                                                     |
| 3437 | 1,3,4,6,8,9<br>,14,16  | 2,5,7,10,1<br>1,12,13,15 | 4                                                                                    | O70417,P02783,P22006,P23593                                                                                     |
| 3438 | 1,3,4,6,8,9<br>,15,16  | 2,5,7,10,1<br>1,12,13,14 | 5                                                                                    | P01681,P02091,P02783,P22006,P23593                                                                              |
| 3439 | 1,3,4,6,8,1<br>0,11,12 | 2,5,7,9,13,<br>14,15,16  | 3                                                                                    | P06911,Q63493,Q9JI85                                                                                            |
| 3440 | 1,3,4,6,8,1<br>0,11,13 | 2,5,7,9,12,<br>14,15,16  | 3                                                                                    | Q63493,Q6AY61,Q9JI85                                                                                            |
| 3441 | 1,3,4,6,8,1<br>0,11,14 | 2,5,7,9,12,<br>13,15,16  | 4                                                                                    | O70417,P15399,Q63751,Q9JI85                                                                                     |
| 3442 | 1,3,4,6,8,1<br>0,11,15 | 2,5,7,9,12,<br>13,14,16  | 9                                                                                    | P02091,P15399,Q4FZU2,Q6IFU7,Q6IFW6,Q6IG02,Q6IMF3,Q6P6Q2,Q6P6S4                                                  |
| 3443 | 1,3,4,6,8,1<br>0,11,16 | 2,5,7,9,12,<br>13,14,15  | 16                                                                                   | P02780,P02781,P02782,P02783,P07151,P07647,P08723,P0C0A9,P15399,P30120,Q5M8C6,Q63493,Q6AY61,Q9JHB9,Q9JI85,Q9QW07 |
| 3444 | 1,3,4,6,8,1<br>0,12,13 | 2,5,7,9,11,<br>14,15,16  | 2                                                                                    | P70549,Q9R168                                                                                                   |
| 3445 | 1,3,4,6,8,1<br>0,12,14 | 2,5,7,9,11,<br>13,15,16  | 2                                                                                    | O70417,P54921                                                                                                   |
| 3446 | 1,3,4,6,8,1<br>0,12,15 | 2,5,7,9,11,<br>13,14,16  | 5                                                                                    | P02091,P10758,P54921,Q63598,Q9R168                                                                              |
| 3447 | 1,3,4,6,8,1<br>0,12,16 | 2,5,7,9,11,<br>13,14,15  | 7                                                                                    | P02625,P02783,P07151,P0DMW0,P0DMW1,P15399,P46844,Q63598                                                         |
| 3448 | 1,3,4,6,8,1<br>0,13,14 | 2,5,7,9,11,<br>12,15,16  | 3                                                                                    | O70417,P70549,P97580                                                                                            |
| 3449 | 1,3,4,6,8,1<br>0,13,15 | 2,5,7,9,11,<br>12,14,16  | 6                                                                                    | P02091,P15399,P62804,P70549,Q498D9,Q63618                                                                       |
| 3450 | 1,3,4,6,8,1<br>0,13,16 | 2,5,7,9,11,<br>12,14,15  | 8                                                                                    | O70257,P02783,P07151,P15399,P46844,P97580,Q30KJ2,Q63424                                                         |
| 3451 | 1,3,4,6,8,1<br>0,14,15 | 2,5,7,9,11,<br>12,13,16  | 6                                                                                    | O70417,P01946,P02091,P15399,P54921,P97580                                                                       |
| 3452 | 1,3,4,6,8,1<br>0,14,16 | 2,5,7,9,11,<br>12,13,15  | 9                                                                                    | O70417,P02783,P07151,P15399,P46844,P54921,P57113,P97580,Q30KJ2                                                  |
| 3453 | 1,3,4,6,8,1<br>0,15,16 | 2,5,7,9,11,<br>12,13,14  | O35077,O70377,O70594,P01946,P02091,P02783,P07151,P15399,P19468,P19629,P46844,P485023 | 8,P53790,P54921,Q03248,Q05175,Q30KJ2,Q63270,Q63424,Q63598,Q6Q0N1,Q8R431,Q9WTW                                   |

|      |                        |                         |    |                                                                                                                                                                                              |
|------|------------------------|-------------------------|----|----------------------------------------------------------------------------------------------------------------------------------------------------------------------------------------------|
| 3454 | 1,3,4,6,8,1<br>1,12,13 | 2,5,7,9,10,<br>14,15,16 | 6  | P06911,P12020,P22282,P36374,Q63493,Q9JI85                                                                                                                                                    |
| 3455 | 1,3,4,6,8,1<br>1,12,14 | 2,5,7,9,10,<br>13,15,16 | 7  | O70417,P06911,P12020,Q5GRG2,Q63493,Q63751,Q9JI85                                                                                                                                             |
| 3456 | 1,3,4,6,8,1<br>1,12,15 | 2,5,7,9,10,<br>13,14,16 | 12 | P02091,P06911,Q4FZU2,Q63493,Q6IFU7,Q6IFW6,Q6IG02,Q6IMF3,Q6P6Q2,Q9JI85,Q9QW07,Q9R168                                                                                                          |
| 3457 | 1,3,4,6,8,1<br>1,12,16 | 2,5,7,9,10,<br>13,14,15 | 25 | O35547,P00762,P02780,P02781,P02782,P02783,P04905,P06911,P07647,P08723,P0C0A9,P12020,P22282,P22283,P30120,P36374,P40241,P46462,P60905,Q5GRG2,Q5M8C6,Q63493,Q9JHB9,Q9JI85,Q9QW07               |
| 3458 | 1,3,4,6,8,1<br>1,13,14 | 2,5,7,9,10,<br>12,15,16 | 7  | B0BNN3,O54728,P06911,Q63493,Q6AY61,Q99041,Q9JI85                                                                                                                                             |
| 3459 | 1,3,4,6,8,1<br>1,13,15 | 2,5,7,9,10,<br>12,14,16 | 9  | P02091,Q4FZU2,Q63493,Q6IFU7,Q6IFW6,Q6IG02,Q6IMF3,Q6P6Q2,Q9JI85                                                                                                                               |
| 3460 | 1,3,4,6,8,1<br>1,13,16 | 2,5,7,9,10,<br>12,14,15 | 25 | B0BNN3,O35547,P00762,P02780,P02781,P02782,P02783,P05369,P07647,P08723,P0C0A9,P22282,P22283,P24368,P30120,P36374,P46462,P60905,Q5M8C6,Q62902,Q63493,Q6AY61,Q99041,Q9JHB9,Q9JI85               |
| 3461 | 1,3,4,6,8,1<br>1,14,15 | 2,5,7,9,10,<br>12,13,16 | 8  | P02091,P02783,Q4FZU2,Q6IFU7,Q6IFW6,Q6IG02,Q6IMF3,Q6P6Q2                                                                                                                                      |
| 3462 | 1,3,4,6,8,1<br>1,14,16 | 2,5,7,9,10,<br>12,13,15 | 19 | O54728,P00762,P02780,P02781,P02782,P02783,P06911,P07647,P08723,P0C0A9,P30120,P46462,Q5GRG2,Q5M8C6,Q6AY61,Q99041,Q9JHB9,Q9JI85,Q9QW07                                                         |
| 3463 | 1,3,4,6,8,1<br>1,15,16 | 2,5,7,9,10,<br>12,13,14 | 27 | P00762,P02091,P02780,P02781,P02782,P02783,P07647,P08723,P0C0A9,P15399,P30120,P36374,P50280,Q4FZU2,Q5M8C6,Q63493,Q6AY61,Q6IFU7,Q6IFW6,Q6IG02,Q6IMF3,Q6P6Q2,Q8CJ52,Q9JHB9,Q9JI85,Q9QW07,Q9QZK9 |
| 3464 | 1,3,4,6,8,1<br>2,13,14 | 2,5,7,9,10,<br>11,15,16 | 3  | O70417,P70549,Q9Z2L0                                                                                                                                                                         |
| 3465 | 1,3,4,6,8,1<br>2,13,15 | 2,5,7,9,10,<br>11,14,16 | 3  | P02091,P70549,Q9R168                                                                                                                                                                         |
| 3466 | 1,3,4,6,8,1<br>2,13,16 | 2,5,7,9,10,<br>11,14,15 | 3  | P00762,P02783,P70549                                                                                                                                                                         |
| 3467 | 1,3,4,6,8,1<br>2,14,15 | 2,5,7,9,10,<br>11,13,16 | 5  | O70417,P02091,P54921,P70549,Q9R168                                                                                                                                                           |
| 3468 | 1,3,4,6,8,1<br>2,14,16 | 2,5,7,9,10,<br>11,13,15 | 3  | O70417,P00762,P02783                                                                                                                                                                         |
| 3469 | 1,3,4,6,8,1<br>2,15,16 | 2,5,7,9,10,<br>11,13,14 | 5  | P00762,P02091,P02783,P10758,Q9R168                                                                                                                                                           |
| 3470 | 1,3,4,6,8,1<br>3,14,15 | 2,5,7,9,10,<br>11,12,16 | 5  | B0BNN3,P02091,P70549,Q03191,Q9Z2L0                                                                                                                                                           |
| 3471 | 1,3,4,6,8,1<br>3,14,16 | 2,5,7,9,10,<br>11,12,15 | 6  | B0BNN3,O54728,P00762,P02783,P97580,Q9Z2L0                                                                                                                                                    |
| 3472 | 1,3,4,6,8,1<br>3,15,16 | 2,5,7,9,10,<br>11,12,14 | 4  | P00762,P02091,P02783,P70549                                                                                                                                                                  |



|      |                        |                         |                                      |
|------|------------------------|-------------------------|--------------------------------------|
| 3473 | 1,3,4,6,8,1<br>4,15,16 | 2,5,7,9,10,<br>11,12,13 | 4 P02091,P02783,P54921,Q03191        |
| 3474 | 1,3,4,6,9,1<br>0,11,12 | 2,5,7,8,13,<br>14,15,16 | 1 Q62714                             |
| 3475 | 1,3,4,6,9,1<br>0,11,13 | 2,5,7,8,12,<br>14,15,16 | 0                                    |
| 3476 | 1,3,4,6,9,1<br>0,11,14 | 2,5,7,8,12,<br>13,15,16 | 1 Q06000                             |
| 3477 | 1,3,4,6,9,1<br>0,11,15 | 2,5,7,8,12,<br>13,14,16 | 1 P02091                             |
| 3478 | 1,3,4,6,9,1<br>0,11,16 | 2,5,7,8,12,<br>13,14,15 | 2 P02783,P22006                      |
| 3479 | 1,3,4,6,9,1<br>0,12,13 | 2,5,7,8,11,<br>14,15,16 | 0                                    |
| 3480 | 1,3,4,6,9,1<br>0,12,14 | 2,5,7,8,11,<br>13,15,16 | 0                                    |
| 3481 | 1,3,4,6,9,1<br>0,12,15 | 2,5,7,8,11,<br>13,14,16 | 3 P02091,P10758,Q00715               |
| 3482 | 1,3,4,6,9,1<br>0,12,16 | 2,5,7,8,11,<br>13,14,15 | 1 P02783                             |
| 3483 | 1,3,4,6,9,1<br>0,13,14 | 2,5,7,8,11,<br>12,15,16 | 2 Q00715,Q06000                      |
| 3484 | 1,3,4,6,9,1<br>0,13,15 | 2,5,7,8,11,<br>12,14,16 | 5 P02091,P11883,P62804,P70549,Q00715 |
| 3485 | 1,3,4,6,9,1<br>0,13,16 | 2,5,7,8,11,<br>12,14,15 | 2 P11883,P22006                      |
| 3486 | 1,3,4,6,9,1<br>0,14,15 | 2,5,7,8,11,<br>12,13,16 | 5 P01946,P02091,P30120,P62804,Q00715 |
| 3487 | 1,3,4,6,9,1<br>0,14,16 | 2,5,7,8,11,<br>12,13,15 | 3 P02783,P22006,Q06000               |
| 3488 | 1,3,4,6,9,1<br>0,15,16 | 2,5,7,8,11,<br>12,13,14 | 5 P02091,P02783,P11883,P22006,Q811M5 |
| 3489 | 1,3,4,6,9,1<br>1,12,13 | 2,5,7,8,10,<br>14,15,16 | 0                                    |
| 3490 | 1,3,4,6,9,1<br>1,12,14 | 2,5,7,8,10,<br>13,15,16 | 0                                    |
| 3491 | 1,3,4,6,9,1<br>1,12,15 | 2,5,7,8,10,<br>13,14,16 | 2 P02091,P25809                      |
| 3492 | 1,3,4,6,9,1<br>1,12,16 | 2,5,7,8,10,<br>13,14,15 | 3 P02783,P22006,P25809               |

|      |                         |                         |   |                                                  |
|------|-------------------------|-------------------------|---|--------------------------------------------------|
| 3493 | 1,3,4,6,9,1<br>1,13,14  | 2,5,7,8,10,<br>12,15,16 | 1 | P0DMW0;P0DMW1                                    |
| 3494 | 1,3,4,6,9,1<br>1,13,15  | 2,5,7,8,10,<br>12,14,16 | 2 | P02091,P62804                                    |
| 3495 | 1,3,4,6,9,1<br>1,13,16  | 2,5,7,8,10,<br>12,14,15 | 2 | P02783,P22006                                    |
| 3496 | 1,3,4,6,9,1<br>1,14,15  | 2,5,7,8,10,<br>12,13,16 | 1 | P02091                                           |
| 3497 | 1,3,4,6,9,1<br>1,14,16  | 2,5,7,8,10,<br>12,13,15 | 2 | P02783,P22006                                    |
| 3498 | 1,3,4,6,9,1<br>1,15,16  | 2,5,7,8,10,<br>12,13,14 | 5 | P02091,P02783,P22006,P25809,P29315               |
| 3499 | 1,3,4,6,9,1<br>2,13,14  | 2,5,7,8,10,<br>11,15,16 | 0 |                                                  |
| 3500 | 1,3,4,6,9,1<br>2,13,15  | 2,5,7,8,10,<br>11,14,16 | 4 | P02091,P62804,P70549,Q00715                      |
| 3501 | 1,3,4,6,9,1<br>2,13,16  | 2,5,7,8,10,<br>11,14,15 | 1 | P22006                                           |
| 3502 | 1,3,4,6,9,1<br>2,14,15  | 2,5,7,8,10,<br>11,13,16 | 2 | P02091,Q00715                                    |
| 3503 | 1,3,4,6,9,1<br>2,14,16  | 2,5,7,8,10,<br>11,13,15 | 2 | P02783,P22006                                    |
| 3504 | 1,3,4,6,9,1<br>2,15,16  | 2,5,7,8,10,<br>11,13,14 | 5 | P02091,P02783,P10758,P22006,P25809               |
| 3505 | 1,3,4,6,9,1<br>3,14,15  | 2,5,7,8,10,<br>11,12,16 | 4 | P02091,P62804,P70549,Q00715                      |
| 3506 | 1,3,4,6,9,1<br>3,14,16  | 2,5,7,8,10,<br>11,12,15 | 3 | P02783,P22006,P23593                             |
| 3507 | 1,3,4,6,9,1<br>3,15,16  | 2,5,7,8,10,<br>11,12,14 | 7 | P02091,P02783,P11883,P22006,P23593,P62804,Q00715 |
| 3508 | 1,3,4,6,9,1<br>4,15,16  | 2,5,7,8,10,<br>11,12,13 | 5 | P02091,P02783,P22006,P23593,P47967               |
| 3509 | 1,3,4,6,10,<br>11,12,13 | 2,5,7,8,9,1<br>4,15,16  | 0 |                                                  |
| 3510 | 1,3,4,6,10,<br>11,12,14 | 2,5,7,8,9,1<br>3,15,16  | 0 |                                                  |
| 3511 | 1,3,4,6,10,<br>11,12,15 | 2,5,7,8,9,1<br>3,14,16  | 2 | P02091,Q6IG02                                    |
| 3512 | 1,3,4,6,10,<br>11,12,16 | 2,5,7,8,9,1<br>3,14,15  | 1 | P02783                                           |

|      |                                             |                                             |
|------|---------------------------------------------|---------------------------------------------|
| 3513 | 1,3,4,6,10, 2,5,7,8,9,1<br>11,13,14 2,15,16 | 1 Q8CJD3                                    |
| 3514 | 1,3,4,6,10, 2,5,7,8,9,1<br>11,13,15 2,14,16 | 3 P02091,Q6IG02,Q8CJD3                      |
| 3515 | 1,3,4,6,10, 2,5,7,8,9,1<br>11,13,16 2,14,15 | 2 P02783,Q8CJD3                             |
| 3516 | 1,3,4,6,10, 2,5,7,8,9,1<br>11,14,15 2,13,16 | 4 P01946,P02091,Q6IG02,Q8CJD3               |
| 3517 | 1,3,4,6,10, 2,5,7,8,9,1<br>11,14,16 2,13,15 | 2 P02783,Q8CJD3                             |
| 3518 | 1,3,4,6,10, 2,5,7,8,9,1<br>11,15,16 2,13,14 | 6 P02091,P02783,P17988,P29315,Q6IG02,Q8CJD3 |
| 3519 | 1,3,4,6,10, 2,5,7,8,9,1<br>12,13,14 1,15,16 | 1 P70549                                    |
| 3520 | 1,3,4,6,10, 2,5,7,8,9,1<br>12,13,15 1,14,16 | 6 P02091,P06760,P10758,P62804,P70549,Q812E4 |
| 3521 | 1,3,4,6,10, 2,5,7,8,9,1<br>12,13,16 1,14,15 | 2 P02783,P06760                             |
| 3522 | 1,3,4,6,10, 2,5,7,8,9,1<br>12,14,15 1,13,16 | 4 P01946,P02091,P06760,P54921               |
| 3523 | 1,3,4,6,10, 2,5,7,8,9,1<br>12,14,16 1,13,15 | 2 P02783,P06760                             |
| 3524 | 1,3,4,6,10, 2,5,7,8,9,1<br>12,15,16 1,13,14 | 5 P02091,P02783,P06760,P0DMW0,P0DMW1,P10758 |
| 3525 | 1,3,4,6,10, 2,5,7,8,9,1<br>13,14,15 1,12,16 | 6 P01946,P02091,P06760,P62804,P70549,Q00715 |
| 3526 | 1,3,4,6,10, 2,5,7,8,9,1<br>13,14,16 1,12,15 | 2 P02783,P06760                             |
| 3527 | 1,3,4,6,10, 2,5,7,8,9,1<br>13,15,16 1,12,14 | 6 P02091,P02783,P06760,P11883,P62804,P70549 |
| 3528 | 1,3,4,6,10, 2,5,7,8,9,1<br>14,15,16 1,12,13 | 6 P01946,P02091,P02783,P06760,P54921,Q9QYP1 |
| 3529 | 1,3,4,6,11, 2,5,7,8,9,1<br>12,13,14 0,15,16 | 1 Q6AYE5                                    |
| 3530 | 1,3,4,6,11, 2,5,7,8,9,1<br>12,13,15 0,14,16 | 1 Q6IG02                                    |
| 3531 | 1,3,4,6,11, 2,5,7,8,9,1<br>12,13,16 0,14,15 | 2 P02783,P05369                             |
| 3532 | 1,3,4,6,11, 2,5,7,8,9,1<br>12,14,15 0,13,16 | 2 P02091,Q6IG02                             |

|      |                                             |                                                                          |
|------|---------------------------------------------|--------------------------------------------------------------------------|
| 3533 | 1,3,4,6,11, 2,5,7,8,9,1<br>12,14,16 0,13,15 | 1 P02783                                                                 |
| 3534 | 1,3,4,6,11, 2,5,7,8,9,1<br>12,15,16 0,13,14 | 5 P02091,P02783,P25809,P29315,Q6IG02                                     |
| 3535 | 1,3,4,6,11, 2,5,7,8,9,1<br>13,14,15 0,12,16 | 2 P02091,Q6IG02                                                          |
| 3536 | 1,3,4,6,11, 2,5,7,8,9,1<br>13,14,16 0,12,15 | 4 B0BNN3,O54728,P02783,P19132                                            |
| 3537 | 1,3,4,6,11, 2,5,7,8,9,1<br>13,15,16 0,12,14 | 4 P02091,P02783,P29315,Q6IG02                                            |
| 3538 | 1,3,4,6,11, 2,5,7,8,9,1<br>14,15,16 0,12,13 | 4 P02091,P02783,P29315,Q6IG02                                            |
| 3539 | 1,3,4,6,12, 2,5,7,8,9,1<br>13,14,15 0,11,16 | 3 P02091,P06760,P70549                                                   |
| 3540 | 1,3,4,6,12, 2,5,7,8,9,1<br>13,14,16 0,11,15 | 2 P02783,P06760                                                          |
| 3541 | 1,3,4,6,12, 2,5,7,8,9,1<br>13,15,16 0,11,14 | 5 P02091,P02783,P06760,P10758,P70549                                     |
| 3542 | 1,3,4,6,12, 2,5,7,8,9,1<br>14,15,16 0,11,13 | 3 P02091,P02783,P06760                                                   |
| 3543 | 1,3,4,6,13, 2,5,7,8,9,1<br>14,15,16 0,11,12 | 4 P02091,P02783,P06760,P70549                                            |
| 3544 | 1,3,4,7,8,9 2,5,6,12,1<br>,10,11 3,14,15,16 | 8 O70417,P01681,P08723,P20646,P35280,P49134,Q63493,Q6P6R2                |
| 3545 | 1,3,4,7,8,9 2,5,6,11,1<br>,10,12 3,14,15,16 | 5 O70417,P01681,P10758,P20646,Q923V8                                     |
| 3546 | 1,3,4,7,8,9 2,5,6,11,1<br>,10,13 2,14,15,16 | 2 P01681,P20646                                                          |
| 3547 | 1,3,4,7,8,9 2,5,6,11,1<br>,10,14 2,13,15,16 | 4 O70417,P01681,P20646,Q63751                                            |
| 3548 | 1,3,4,7,8,9 2,5,6,11,1<br>,10,15 2,13,14,16 | 8 O70417,P01681,P10758,P20646,P35280,Q5RKI1,Q6P6R2,Q9Z0V6                |
| 3549 | 1,3,4,7,8,9 2,5,6,11,1<br>,10,16 2,13,14,15 | 4 O70417,P01681,P20646,Q64093                                            |
| 3550 | 1,3,4,7,8,9 2,5,6,10,1<br>,11,12 3,14,15,16 | 10 O70417,P01681,P08723,P35280,P36374,P70709,Q5M8C6,Q63493,Q6Q7Y5,Q812E4 |
| 3551 | 1,3,4,7,8,9 2,5,6,10,1<br>,11,13 2,14,15,16 | 9 B0BNN3,P01681,P08723,P20646,P35280,Q62902,Q63493,Q6Q7Y5,Q812E4         |
| 3552 | 1,3,4,7,8,9 2,5,6,10,1<br>,11,14 2,13,15,16 | 10 B0BNN3,O70417,P01681,P20646,P35280,Q63493,Q63751,Q6P6R2,Q6Q7Y5,Q812E4 |

|      |                        |                          |    |                                                                                                                                                    |
|------|------------------------|--------------------------|----|----------------------------------------------------------------------------------------------------------------------------------------------------|
| 3553 | 1,3,4,7,8,9<br>,11,15  | 2,5,6,10,1<br>2,13,14,16 | 14 | P01681,P08723,P20646,P35280,Q4FZU2,Q63493,Q6IFU8,Q6IFW6,Q6IG02,Q6IMF3,Q6P6Q2,Q6P6R2,Q6P6S4,Q8CJ52                                                  |
| 3554 | 1,3,4,7,8,9<br>,11,16  | 2,5,6,10,1<br>2,13,14,15 | 21 | P01681,P02780,P02781,P02782,P04905,P07647,P08723,P09456,P0C0A9,P20646,P22282,P22283,P30120,P35280,P36374,Q5M8C6,Q62902,Q63493,Q6Q7Y5,Q812E4,Q9JHB9 |
| 3555 | 1,3,4,7,8,9<br>,12,13  | 2,5,6,10,1<br>1,14,15,16 | 1  | P01681                                                                                                                                             |
| 3556 | 1,3,4,7,8,9<br>,12,14  | 2,5,6,10,1<br>1,13,15,16 | 3  | O70417,P01681,Q63751                                                                                                                               |
| 3557 | 1,3,4,7,8,9<br>,12,15  | 2,5,6,10,1<br>1,13,14,16 | 5  | O70417,P01681,P10758,P20646,P35280                                                                                                                 |
| 3558 | 1,3,4,7,8,9<br>,12,16  | 2,5,6,10,1<br>1,13,14,15 | 4  | O70417,P01681,P10758,P20646                                                                                                                        |
| 3559 | 1,3,4,7,8,9<br>,13,14  | 2,5,6,10,1<br>1,12,15,16 | 6  | B0BNN3,O70417,P01681,P20646,Q5QE79,Q63751                                                                                                          |
| 3560 | 1,3,4,7,8,9<br>,13,15  | 2,5,6,10,1<br>1,12,14,16 | 3  | P01681,P20646,P35280                                                                                                                               |
| 3561 | 1,3,4,7,8,9<br>,13,16  | 2,5,6,10,1<br>1,12,14,15 | 4  | B0BNN3,P01681,P20646,Q62902                                                                                                                        |
| 3562 | 1,3,4,7,8,9<br>,14,15  | 2,5,6,10,1<br>1,12,13,16 | 4  | O70417,P01681,P20646,P35280                                                                                                                        |
| 3563 | 1,3,4,7,8,9<br>,14,16  | 2,5,6,10,1<br>1,12,13,15 | 5  | B0BNN3,O70417,P01681,P20646,P23593                                                                                                                 |
| 3564 | 1,3,4,7,8,9<br>,15,16  | 2,5,6,10,1<br>1,12,13,14 | 5  | P01681,P10758,P20646,P23593,P35280                                                                                                                 |
| 3565 | 1,3,4,7,8,1<br>0,11,12 | 2,5,6,9,13,<br>14,15,16  | 8  | O70417,P08723,P36374,P47967,P97840,Q5I0D1,Q5M8C6,Q63493                                                                                            |
| 3566 | 1,3,4,7,8,1<br>0,11,13 | 2,5,6,9,12,<br>14,15,16  | 5  | B0BNN3,P08723,P47967,P97840,Q63493                                                                                                                 |
| 3567 | 1,3,4,7,8,1<br>0,11,14 | 2,5,6,9,12,<br>13,15,16  | 4  | B0BNN3,O70417,Q63493,Q63751                                                                                                                        |
| 3568 | 1,3,4,7,8,1<br>0,11,15 | 2,5,6,9,12,<br>13,14,16  | 12 | P01681,P08723,P20646,Q4FZU2,Q5RKI1,Q63493,Q6IFU8,Q6IFW6,Q6IG02,Q6IMF3,Q6P6Q2,Q8CJ52                                                                |
| 3569 | 1,3,4,7,8,1<br>0,11,16 | 2,5,6,9,12,<br>13,14,15  | 21 | P00762,P02780,P02781,P02782,P04905,P07647,P08010,P08723,P0C0A9,P20646,P22282,P22283,P24368,P30120,P36374,Q5M8C6,Q63424,Q63493,Q64093,Q9JHB9,Q9WTW7 |
| 3570 | 1,3,4,7,8,1<br>0,12,13 | 2,5,6,9,11,<br>14,15,16  | 5  | P10758,P47967,P97840,Q5I0J9,Q923V8                                                                                                                 |
| 3571 | 1,3,4,7,8,1<br>0,12,14 | 2,5,6,9,11,<br>13,15,16  | 2  | O70417,Q5RLM2                                                                                                                                      |
| 3572 | 1,3,4,7,8,1<br>0,12,15 | 2,5,6,9,11,<br>13,14,16  | 8  | O70417,P01681,P10758,Q5I0J9,Q5RKI1,Q63598,Q64093,Q9WTW7                                                                                            |

|      |                        |                         |    |                                                                                                                                                                                                                                                |
|------|------------------------|-------------------------|----|------------------------------------------------------------------------------------------------------------------------------------------------------------------------------------------------------------------------------------------------|
| 3573 | 1,3,4,7,8,1<br>0,12,16 | 2,5,6,9,11,<br>13,14,15 | 16 | O70417,P0DMW0;P0DMW1,P10758,P19468,P46844,P97840,Q3ZAV1,Q63424,Q63598,Q64093,<br>Q6AY41,Q80W57,Q8R431,Q923V8,Q9JJ40,Q9WTW7                                                                                                                     |
| 3574 | 1,3,4,7,8,1<br>0,13,14 | 2,5,6,9,11,<br>12,15,16 | 3  | B0BNN3,O70417,Q9WUW8                                                                                                                                                                                                                           |
| 3575 | 1,3,4,7,8,1<br>0,13,15 | 2,5,6,9,11,<br>12,14,16 | 14 | O70377,P10758,P19468,P20646,P70549,Q5I0J9,Q5RKI1,Q63424,Q63598,Q63618,Q64093,Q6Q<br>0N1,Q80W57,Q8R431                                                                                                                                          |
| 3576 | 1,3,4,7,8,1<br>0,13,16 | 2,5,6,9,11,<br>12,14,15 | 21 | B0BNN3,O35077,O70257,O70377,P00762,P19468,P28570,P46844,P57113,Q3ZAV1,Q5I0J9,Q63<br>424,Q63598,Q63618,Q64093,Q6AY41,Q6Q0N1,Q80W57,Q8R431,Q9JJ40,Q9WTW7                                                                                         |
| 3577 | 1,3,4,7,8,1<br>0,14,15 | 2,5,6,9,11,<br>12,13,16 | 9  | O70377,O70417,P01681,P20646,P54921,Q05175,Q5RKI1,Q64093,Q923S2                                                                                                                                                                                 |
| 3578 | 1,3,4,7,8,1<br>0,14,16 | 2,5,6,9,11,<br>12,13,15 | 16 | B0BNN3,O35077,O70377,O70417,P19468,P20646,P46844,P57113,P97608,Q63424,Q64093,Q8<br>R431,Q923S2,Q99MH3,Q9WUW8,Q9WUW9                                                                                                                            |
| 3579 | 1,3,4,7,8,1<br>0,15,16 | 2,5,6,9,11,<br>12,13,14 | 33 | O35077,O70377,O70594,P10758,P19468,P20646,P46844,P48508,P53790,P57113,P97608,Q032<br>48,Q05175,Q3ZAV1,Q5I0E9,Q5I0J9,Q5M7T9,Q5RKI1,Q63270,Q63355,Q63424,Q63598,Q64093,<br>Q64268,Q6AY41,Q6MG61,Q6Q0N1,Q80W57,Q8R431,Q923S2,Q9JJ40,Q9WTW7,Q9Z0W7 |
| 3580 | 1,3,4,7,8,1<br>1,12,13 | 2,5,6,9,10,<br>14,15,16 | 13 | B0BNN3,P02780,P02782,P08723,P22282,P36374,P40241,P47967,P97840,Q5I0D1,Q5M8C6,Q63<br>493,Q811M5                                                                                                                                                 |
| 3581 | 1,3,4,7,8,1<br>1,12,14 | 2,5,6,9,10,<br>13,15,16 | 8  | O70417,P06911,P11883,P36374,Q5M8C6,Q63493,Q63751,Q811M5                                                                                                                                                                                        |
| 3582 | 1,3,4,7,8,1<br>1,12,15 | 2,5,6,9,10,<br>13,14,16 | 12 | P01681,P08723,P36374,P97840,Q4FZU2,Q63493,Q6IFU8,Q6IFW6,Q6IG02,Q6IMF3,Q6P6Q2,Q8<br>CJ52                                                                                                                                                        |
| 3583 | 1,3,4,7,8,1<br>1,12,16 | 2,5,6,9,10,<br>13,14,15 | 23 | O35547,P00762,P02780,P02781,P02782,P04905,P07647,P08010,P08723,P0C0A9,P22282,P2228<br>3,P24368,P30120,P36374,P40241,P46462,P97840,Q5M8C6,Q63493,Q811M5,Q9JHB9,Q9QW07                                                                           |
| 3584 | 1,3,4,7,8,1<br>1,13,14 | 2,5,6,9,10,<br>12,15,16 | 7  | B0BNN3,O54728,P08723,Q5M8C6,Q63493,Q811M5,Q99041                                                                                                                                                                                               |
| 3585 | 1,3,4,7,8,1<br>1,13,15 | 2,5,6,9,10,<br>12,14,16 | 10 | B0BNN3,P08723,Q4FZU2,Q63493,Q6IFU8,Q6IFW6,Q6IG02,Q6IMF3,Q6P6Q2,Q8CJ52                                                                                                                                                                          |
| 3586 | 1,3,4,7,8,1<br>1,13,16 | 2,5,6,9,10,<br>12,14,15 | 26 | B0BNN3,P00762,P02780,P02781,P02782,P05369,P07647,P08010,P08723,P09456,P0C0A9,P1663<br>6,P22282,P22283,P24368,P30120,P36374,P40241,P46462,P97840,Q5M8C6,Q62902,Q63493,Q8<br>11M5,Q99MH3,Q9JHB9                                                  |
| 3587 | 1,3,4,7,8,1<br>1,14,15 | 2,5,6,9,10,<br>12,13,16 | 12 | B0BNN3,D3ZTX0,P01681,P20646,Q4FZU2,Q63493,Q6IFU8,Q6IFW6,Q6IG02,Q6IMF3,Q6P6Q2,Q<br>8CJ52                                                                                                                                                        |
| 3588 | 1,3,4,7,8,1<br>1,14,16 | 2,5,6,9,10,<br>12,13,15 | 26 | B0BNN3,D3ZTX0,O54728,O70417,P00762,P02780,P02781,P02782,P07647,P08010,P08649,P087<br>23,P0C0A9,P22282,P22283,P30120,P36374,P46462,Q5M8C6,Q62902,Q63493,Q811M5,Q812E4,<br>Q99041,Q99MH3,Q9JHB9                                                  |
| 3589 | 1,3,4,7,8,1<br>1,15,16 | 2,5,6,9,10,<br>12,13,14 | 27 | P00762,P01681,P02780,P02781,P02782,P07647,P08010,P08723,P0C0A9,P16636,P20646,P2228<br>2,P22283,P30120,P36374,Q4FZU2,Q5M8C6,Q62902,Q63493,Q6IFU8,Q6IFW6,Q6IG02,Q6IMF3,<br>Q6P6Q2,Q8CJ52,Q9JHB9,Q9QW07                                           |
| 3590 | 1,3,4,7,8,1<br>2,13,14 | 2,5,6,9,10,<br>11,15,16 | 4  | B0BNN3,O70417,Q811M5,Q9Z2L0                                                                                                                                                                                                                    |

|      |                        |                         |    |                                                                       |
|------|------------------------|-------------------------|----|-----------------------------------------------------------------------|
| 3591 | 1,3,4,7,8,1<br>2,13,15 | 2,5,6,9,10,<br>11,14,16 | 5  | P10758,P70549,P97840,Q5I0J9,Q9Z2L0                                    |
| 3592 | 1,3,4,7,8,1<br>2,13,16 | 2,5,6,9,10,<br>11,14,15 | 5  | B0BNN3,P00762,P97840,Q923V8,Q9Z2L0                                    |
| 3593 | 1,3,4,7,8,1<br>2,14,15 | 2,5,6,9,10,<br>11,13,16 | 3  | O70417,P01681,Q9Z2L0                                                  |
| 3594 | 1,3,4,7,8,1<br>2,14,16 | 2,5,6,9,10,<br>11,13,15 | 5  | B0BNN3,O70417,P00762,Q99MH3,Q9Z2L0                                    |
| 3595 | 1,3,4,7,8,1<br>2,15,16 | 2,5,6,9,10,<br>11,13,14 | 2  | P00762,P10758                                                         |
| 3596 | 1,3,4,7,8,1<br>3,14,15 | 2,5,6,9,10,<br>11,12,16 | 3  | B0BNN3,P70549,Q9Z2L0                                                  |
| 3597 | 1,3,4,7,8,1<br>3,14,16 | 2,5,6,9,10,<br>11,12,15 | 7  | B0BNN3,O54728,P00762,Q811M5,Q99MH3,Q9WUW8,Q9Z2L0                      |
| 3598 | 1,3,4,7,8,1<br>3,15,16 | 2,5,6,9,10,<br>11,12,14 | 10 | B0BNN3,O35077,P00762,P10758,P16636,P20646,Q5I0J9,Q64093,Q6AYQ8,Q9Z2L0 |
| 3599 | 1,3,4,7,8,1<br>4,15,16 | 2,5,6,9,10,<br>11,12,13 | 6  | B0BNN3,O35077,O70417,P00762,P20646,Q9Z2L0                             |
| 3600 | 1,3,4,7,9,1<br>0,11,12 | 2,5,6,8,13,<br>14,15,16 | 1  | Q62714                                                                |
| 3601 | 1,3,4,7,9,1<br>0,11,13 | 2,5,6,8,12,<br>14,15,16 | 0  |                                                                       |
| 3602 | 1,3,4,7,9,1<br>0,11,14 | 2,5,6,8,12,<br>13,15,16 | 0  |                                                                       |
| 3603 | 1,3,4,7,9,1<br>0,11,15 | 2,5,6,8,12,<br>13,14,16 | 1  | Q5RKI1                                                                |
| 3604 | 1,3,4,7,9,1<br>0,11,16 | 2,5,6,8,12,<br>13,14,15 | 0  |                                                                       |
| 3605 | 1,3,4,7,9,1<br>0,12,13 | 2,5,6,8,11,<br>14,15,16 | 1  | P10758                                                                |
| 3606 | 1,3,4,7,9,1<br>0,12,14 | 2,5,6,8,11,<br>13,15,16 | 0  |                                                                       |
| 3607 | 1,3,4,7,9,1<br>0,12,15 | 2,5,6,8,11,<br>13,14,16 | 2  | P10758,Q5RKI1                                                         |
| 3608 | 1,3,4,7,9,1<br>0,12,16 | 2,5,6,8,11,<br>13,14,15 | 1  | P10758                                                                |
| 3609 | 1,3,4,7,9,1<br>0,13,14 | 2,5,6,8,11,<br>12,15,16 | 0  |                                                                       |
| 3610 | 1,3,4,7,9,1<br>0,13,15 | 2,5,6,8,11,<br>12,14,16 | 3  | P10758,Q00715,Q5RKI1                                                  |

|      |                        |                         |                               |
|------|------------------------|-------------------------|-------------------------------|
| 3611 | 1,3,4,7,9,1<br>0,13,16 | 2,5,6,8,11,<br>12,14,15 | 0                             |
| 3612 | 1,3,4,7,9,1<br>0,14,15 | 2,5,6,8,11,<br>12,13,16 | 1 Q5RKI1                      |
| 3613 | 1,3,4,7,9,1<br>0,14,16 | 2,5,6,8,11,<br>12,13,15 | 0                             |
| 3614 | 1,3,4,7,9,1<br>0,15,16 | 2,5,6,8,11,<br>12,13,14 | 3 P10758,Q5RKI1,Q64268        |
| 3615 | 1,3,4,7,9,1<br>1,12,13 | 2,5,6,8,10,<br>14,15,16 | 2 P97840,Q62761;Q62762;Q62763 |
| 3616 | 1,3,4,7,9,1<br>1,12,14 | 2,5,6,8,10,<br>13,15,16 | 1 Q62761;Q62762;Q62763        |
| 3617 | 1,3,4,7,9,1<br>1,12,15 | 2,5,6,8,10,<br>13,14,16 | 2 P25031,Q62761;Q62762;Q62763 |
| 3618 | 1,3,4,7,9,1<br>1,12,16 | 2,5,6,8,10,<br>13,14,15 | 0                             |
| 3619 | 1,3,4,7,9,1<br>1,13,14 | 2,5,6,8,10,<br>12,15,16 | 3 B0BNN3,P0DMW0;P0DMW1,P25031 |
| 3620 | 1,3,4,7,9,1<br>1,13,15 | 2,5,6,8,10,<br>12,14,16 | 2 P25031,Q6IG02               |
| 3621 | 1,3,4,7,9,1<br>1,13,16 | 2,5,6,8,10,<br>12,14,15 | 0                             |
| 3622 | 1,3,4,7,9,1<br>1,14,15 | 2,5,6,8,10,<br>12,13,16 | 2 P0DMW0;P0DMW1,P25031        |
| 3623 | 1,3,4,7,9,1<br>1,14,16 | 2,5,6,8,10,<br>12,13,15 | 0                             |
| 3624 | 1,3,4,7,9,1<br>1,15,16 | 2,5,6,8,10,<br>12,13,14 | 4 P25031,P29315,Q6IFW6,Q8CJ52 |
| 3625 | 1,3,4,7,9,1<br>2,13,14 | 2,5,6,8,10,<br>11,15,16 | 0                             |
| 3626 | 1,3,4,7,9,1<br>2,13,15 | 2,5,6,8,10,<br>11,14,16 | 1 P10758                      |
| 3627 | 1,3,4,7,9,1<br>2,13,16 | 2,5,6,8,10,<br>11,14,15 | 0                             |
| 3628 | 1,3,4,7,9,1<br>2,14,15 | 2,5,6,8,10,<br>11,13,16 | 0                             |
| 3629 | 1,3,4,7,9,1<br>2,14,16 | 2,5,6,8,10,<br>11,13,15 | 1 Q68G31                      |
| 3630 | 1,3,4,7,9,1<br>2,15,16 | 2,5,6,8,10,<br>11,13,14 | 2 P10758,Q68G31               |



|      |                         |                         |   |                                                  |
|------|-------------------------|-------------------------|---|--------------------------------------------------|
| 3631 | 1,3,4,7,9,1<br>3,14,15  | 2,5,6,8,10,<br>11,12,16 | 2 | P25031,Q00715                                    |
| 3632 | 1,3,4,7,9,1<br>3,14,16  | 2,5,6,8,10,<br>11,12,15 | 1 | B0BNN3                                           |
| 3633 | 1,3,4,7,9,1<br>3,15,16  | 2,5,6,8,10,<br>11,12,14 | 1 | P10758                                           |
| 3634 | 1,3,4,7,9,1<br>4,15,16  | 2,5,6,8,10,<br>11,12,13 | 0 |                                                  |
| 3635 | 1,3,4,7,10,<br>11,12,13 | 2,5,6,8,9,1<br>4,15,16  | 3 | P47967,P97840,Q5I0D1                             |
| 3636 | 1,3,4,7,10,<br>11,12,14 | 2,5,6,8,9,1<br>3,15,16  | 0 |                                                  |
| 3637 | 1,3,4,7,10,<br>11,12,15 | 2,5,6,8,9,1<br>3,14,16  | 5 | P10758,P97840,Q5RKI1,Q6IFW6,Q6IG02               |
| 3638 | 1,3,4,7,10,<br>11,12,16 | 2,5,6,8,9,1<br>3,14,15  | 2 | P10758,P97840                                    |
| 3639 | 1,3,4,7,10,<br>11,13,14 | 2,5,6,8,9,1<br>2,15,16  | 2 | B0BNN3,Q8CJD3                                    |
| 3640 | 1,3,4,7,10,<br>11,13,15 | 2,5,6,8,9,1<br>2,14,16  | 5 | P97840,Q5RKI1,Q6IFW6,Q6IG02,Q8CJD3               |
| 3641 | 1,3,4,7,10,<br>11,13,16 | 2,5,6,8,9,1<br>2,14,15  | 3 | P97840,Q6AYQ8,Q8CJD3                             |
| 3642 | 1,3,4,7,10,<br>11,14,15 | 2,5,6,8,9,1<br>2,13,16  | 4 | Q5RKI1,Q6IFW6,Q6IG02,Q8CJD3                      |
| 3643 | 1,3,4,7,10,<br>11,14,16 | 2,5,6,8,9,1<br>2,13,15  | 1 | Q8CJD3                                           |
| 3644 | 1,3,4,7,10,<br>11,15,16 | 2,5,6,8,9,1<br>2,13,14  | 7 | P10758,P17988,P29315,Q5RKI1,Q6IFW6,Q6IG02,Q8CJD3 |
| 3645 | 1,3,4,7,10,<br>12,13,14 | 2,5,6,8,9,1<br>1,15,16  | 0 |                                                  |
| 3646 | 1,3,4,7,10,<br>12,13,15 | 2,5,6,8,9,1<br>1,14,16  | 5 | P10758,P70549,P97840,Q5I0J9,Q5RKI1               |
| 3647 | 1,3,4,7,10,<br>12,13,16 | 2,5,6,8,9,1<br>1,14,15  | 3 | P10758,P97840,Q5I0J9                             |
| 3648 | 1,3,4,7,10,<br>12,14,15 | 2,5,6,8,9,1<br>1,13,16  | 2 | P10758,Q5RKI1                                    |
| 3649 | 1,3,4,7,10,<br>12,14,16 | 2,5,6,8,9,1<br>1,13,15  | 1 | P10758                                           |
| 3650 | 1,3,4,7,10,<br>12,15,16 | 2,5,6,8,9,1<br>1,13,14  | 7 | P10758,P18297,P97840,Q5I0J9,Q5RKI1,Q64093,Q64268 |

|      |                                             |                                                                                        |
|------|---------------------------------------------|----------------------------------------------------------------------------------------|
| 3651 | 1,3,4,7,10, 2,5,6,8,9,1<br>13,14,15 1,12,16 | 1 Q5RKI1                                                                               |
| 3652 | 1,3,4,7,10, 2,5,6,8,9,1<br>13,14,16 1,12,15 | 3 B0BNN3,P36376,Q99MH3                                                                 |
| 3653 | 1,3,4,7,10, 2,5,6,8,9,1<br>13,15,16 1,12,14 | 10 P10758,P18297,P19468,P51792;P51794;P51796,Q5IOJ9,Q5RKI1,Q63424,Q64093,Q64268,Q6AYQ8 |
| 3654 | 1,3,4,7,10, 2,5,6,8,9,1<br>14,15,16 1,12,13 | 5 P10758,P18297,Q5RKI1,Q64268,Q9QYP1                                                   |
| 3655 | 1,3,4,7,11, 2,5,6,8,9,1<br>12,13,14 0,15,16 | 5 B0BNN3,P25031,P97840,Q6AYE5,Q811M5                                                   |
| 3656 | 1,3,4,7,11, 2,5,6,8,9,1<br>12,13,15 0,14,16 | 4 P25031,P97840,Q6IFW6,Q6IG02                                                          |
| 3657 | 1,3,4,7,11, 2,5,6,8,9,1<br>12,13,16 0,14,15 | 4 P05369,P47967,P97840,Q811M5                                                          |
| 3658 | 1,3,4,7,11, 2,5,6,8,9,1<br>12,14,15 0,13,16 | 4 D3ZTX0,P25031,Q6IFW6,Q6IG02                                                          |
| 3659 | 1,3,4,7,11, 2,5,6,8,9,1<br>12,14,16 0,13,15 | 3 D3ZTX0,Q811M5,Q99MH3                                                                 |
| 3660 | 1,3,4,7,11, 2,5,6,8,9,1<br>12,15,16 0,13,14 | 8 P10758,P17559,P25031,P29315,P97840,Q6IFW6,Q6IG02,Q8CJ52                              |
| 3661 | 1,3,4,7,11, 2,5,6,8,9,1<br>13,14,15 0,12,16 | 4 B0BNN3,D3ZTX0,P25031,Q6IG02                                                          |
| 3662 | 1,3,4,7,11, 2,5,6,8,9,1<br>13,14,16 0,12,15 | 7 B0BNN3,D3ZTX0,O54728,P25031,P36376,Q811M5,Q99MH3                                     |
| 3663 | 1,3,4,7,11, 2,5,6,8,9,1<br>13,15,16 0,12,14 | 7 B0BNN3,P25031,P29315,Q6AYQ8,Q6IFW6,Q6IG02,Q8CJ52                                     |
| 3664 | 1,3,4,7,11, 2,5,6,8,9,1<br>14,15,16 0,12,13 | 7 D3ZTX0,P17559,P25031,P29315,Q6IFW6,Q6IG02,Q8CJ52                                     |
| 3665 | 1,3,4,7,12, 2,5,6,8,9,1<br>13,14,15 0,11,16 | 3 P25031,P70549,Q9Z2L0                                                                 |
| 3666 | 1,3,4,7,12, 2,5,6,8,9,1<br>13,14,16 0,11,15 | 4 B0BNN3,Q811M5,Q99MH3,Q9Z2L0                                                          |
| 3667 | 1,3,4,7,12, 2,5,6,8,9,1<br>13,15,16 0,11,14 | 3 P10758,P97840,Q5IOJ9                                                                 |
| 3668 | 1,3,4,7,12, 2,5,6,8,9,1<br>14,15,16 0,11,13 | 1 P10758                                                                               |
| 3669 | 1,3,4,7,13, 2,5,6,8,9,1<br>14,15,16 0,11,12 | 3 B0BNN3,Q99MH3,Q9Z2L0                                                                 |
| 3670 | 1,3,4,8,9,1 2,5,6,7,13,<br>0,11,12 14,15,16 | 5 O88797,P01681,P01835,Q62714,Q6Q7Y5                                                   |

|      |                        |                         |   |                                                                |
|------|------------------------|-------------------------|---|----------------------------------------------------------------|
| 3671 | 1,3,4,8,9,1<br>0,11,13 | 2,5,6,7,12,<br>14,15,16 | 2 | P01681,Q6AY61                                                  |
| 3672 | 1,3,4,8,9,1<br>0,11,14 | 2,5,6,7,12,<br>13,15,16 | 3 | O70417,P01681,P01835                                           |
| 3673 | 1,3,4,8,9,1<br>0,11,15 | 2,5,6,7,12,<br>13,14,16 | 8 | P01681,P01835,Q4FZU2,Q6IFW6,Q6IG02,Q6IMF3,Q6P6Q2,Q6P6S4        |
| 3674 | 1,3,4,8,9,1<br>0,11,16 | 2,5,6,7,12,<br>13,14,15 | 4 | O88797,P01681,P01835,Q6AY61                                    |
| 3675 | 1,3,4,8,9,1<br>0,12,13 | 2,5,6,7,11,<br>14,15,16 | 1 | P01681                                                         |
| 3676 | 1,3,4,8,9,1<br>0,12,14 | 2,5,6,7,11,<br>13,15,16 | 2 | O70417,P01681                                                  |
| 3677 | 1,3,4,8,9,1<br>0,12,15 | 2,5,6,7,11,<br>13,14,16 | 3 | P01681,P01835,P10758                                           |
| 3678 | 1,3,4,8,9,1<br>0,12,16 | 2,5,6,7,11,<br>13,14,15 | 3 | P01681,P01835,P10758                                           |
| 3679 | 1,3,4,8,9,1<br>0,13,14 | 2,5,6,7,11,<br>12,15,16 | 1 | P01681                                                         |
| 3680 | 1,3,4,8,9,1<br>0,13,15 | 2,5,6,7,11,<br>12,14,16 | 3 | P01681,P62804,Q00715                                           |
| 3681 | 1,3,4,8,9,1<br>0,13,16 | 2,5,6,7,11,<br>12,14,15 | 0 |                                                                |
| 3682 | 1,3,4,8,9,1<br>0,14,15 | 2,5,6,7,11,<br>12,13,16 | 1 | P01681                                                         |
| 3683 | 1,3,4,8,9,1<br>0,14,16 | 2,5,6,7,11,<br>12,13,15 | 2 | O70417,P01681                                                  |
| 3684 | 1,3,4,8,9,1<br>0,15,16 | 2,5,6,7,11,<br>12,13,14 | 2 | P01681,P10758                                                  |
| 3685 | 1,3,4,8,9,1<br>1,12,13 | 2,5,6,7,10,<br>14,15,16 | 4 | P01681,P09527,Q64335,Q6Q7Y5                                    |
| 3686 | 1,3,4,8,9,1<br>1,12,14 | 2,5,6,7,10,<br>13,15,16 | 6 | O70417,O88797,P01681,P01835,Q64335,Q6Q7Y5                      |
| 3687 | 1,3,4,8,9,1<br>1,12,15 | 2,5,6,7,10,<br>13,14,16 | 9 | O88797,P01681,P01835,Q4FZU2,Q6IFW6,Q6IG02,Q6IMF3,Q6P6Q2,Q6Q7Y5 |
| 3688 | 1,3,4,8,9,1<br>1,12,16 | 2,5,6,7,10,<br>13,14,15 | 5 | O88797,P00762,P01681,P01835,Q6Q7Y5                             |
| 3689 | 1,3,4,8,9,1<br>1,13,14 | 2,5,6,7,10,<br>12,15,16 | 5 | B0BNN3,O54728,P01681,Q64335,Q6AY61                             |
| 3690 | 1,3,4,8,9,1<br>1,13,15 | 2,5,6,7,10,<br>12,14,16 | 6 | P01681,Q4FZU2,Q6IFW6,Q6IG02,Q6IMF3,Q6P6Q2                      |

|      |                         |                         |    |                                                                              |
|------|-------------------------|-------------------------|----|------------------------------------------------------------------------------|
| 3691 | 1,3,4,8,9,1<br>1,13,16  | 2,5,6,7,10,<br>12,14,15 | 6  | O88797,P00762,P02782,P30120,Q62902,Q6AY61                                    |
| 3692 | 1,3,4,8,9,1<br>1,14,15  | 2,5,6,7,10,<br>12,13,16 | 7  | P01681,P01835,Q4FZU2,Q6IFW6,Q6IG02,Q6IMF3,Q6P6Q2                             |
| 3693 | 1,3,4,8,9,1<br>1,14,16  | 2,5,6,7,10,<br>12,13,15 | 7  | O54728,O88797,P00762,P01681,P01835,Q6AY61,Q812E4                             |
| 3694 | 1,3,4,8,9,1<br>1,15,16  | 2,5,6,7,10,<br>12,13,14 | 11 | O88797,P00762,P01681,P01835,P29315,Q4FZU2,Q6AY61,Q6IFW6,Q6IG02,Q6IMF3,Q6P6Q2 |
| 3695 | 1,3,4,8,9,1<br>2,13,14  | 2,5,6,7,10,<br>11,15,16 | 1  | P17988                                                                       |
| 3696 | 1,3,4,8,9,1<br>2,13,15  | 2,5,6,7,10,<br>11,14,16 | 1  | P01681                                                                       |
| 3697 | 1,3,4,8,9,1<br>2,13,16  | 2,5,6,7,10,<br>11,14,15 | 1  | P00762                                                                       |
| 3698 | 1,3,4,8,9,1<br>2,14,15  | 2,5,6,7,10,<br>11,13,16 | 1  | P01681                                                                       |
| 3699 | 1,3,4,8,9,1<br>2,14,16  | 2,5,6,7,10,<br>11,13,15 | 3  | O70417,P00762,P01681                                                         |
| 3700 | 1,3,4,8,9,1<br>2,15,16  | 2,5,6,7,10,<br>11,13,14 | 3  | P00762,P01681,P10758                                                         |
| 3701 | 1,3,4,8,9,1<br>3,14,15  | 2,5,6,7,10,<br>11,12,16 | 2  | P01681,Q00715                                                                |
| 3702 | 1,3,4,8,9,1<br>3,14,16  | 2,5,6,7,10,<br>11,12,15 | 4  | B0BNN3,O54728,P00762,P23593                                                  |
| 3703 | 1,3,4,8,9,1<br>3,15,16  | 2,5,6,7,10,<br>11,12,14 | 3  | P00762,P01681,P23593                                                         |
| 3704 | 1,3,4,8,9,1<br>4,15,16  | 2,5,6,7,10,<br>11,12,13 | 3  | P01681,P23593,P47967                                                         |
| 3705 | 1,3,4,8,10,<br>11,12,13 | 2,5,6,7,9,1<br>4,15,16  | 0  |                                                                              |
| 3706 | 1,3,4,8,10,<br>11,12,14 | 2,5,6,7,9,1<br>3,15,16  | 1  | O70417                                                                       |
| 3707 | 1,3,4,8,10,<br>11,12,15 | 2,5,6,7,9,1<br>3,14,16  | 6  | Q4FZU2,Q6IFW6,Q6IG02,Q6IMF3,Q6P6Q2,Q9R168                                    |
| 3708 | 1,3,4,8,10,<br>11,12,16 | 2,5,6,7,9,1<br>3,14,15  | 3  | P00762,P01835,P02625                                                         |
| 3709 | 1,3,4,8,10,<br>11,13,14 | 2,5,6,7,9,1<br>2,15,16  | 2  | B0BNN3,O54728                                                                |
| 3710 | 1,3,4,8,10,<br>11,13,15 | 2,5,6,7,9,1<br>2,14,16  | 6  | Q4FZU2,Q6IFU7,Q6IFW6,Q6IG02,Q6IMF3,Q6P6Q2                                    |

|      |                                             |                                                           |
|------|---------------------------------------------|-----------------------------------------------------------|
| 3711 | 1,3,4,8,10, 2,5,6,7,9,1<br>11,13,16 2,14,15 | 5 B0BNN3,P00762,P02782,P30120,Q6AY61                      |
| 3712 | 1,3,4,8,10, 2,5,6,7,9,1<br>11,14,15 2,13,16 | 6 Q4FZU2,Q6IFU7,Q6IFW6,Q6IG02,Q6IMF3,Q6P6Q2               |
| 3713 | 1,3,4,8,10, 2,5,6,7,9,1<br>11,14,16 2,13,15 | 2 O54728,P00762                                           |
| 3714 | 1,3,4,8,10, 2,5,6,7,9,1<br>11,15,16 2,13,14 | 8 P00762,P29315,Q4FZU2,Q6IFU7,Q6IFW6,Q6IG02,Q6IMF3,Q6P6Q2 |
| 3715 | 1,3,4,8,10, 2,5,6,7,9,1<br>12,13,14 1,15,16 | 0                                                         |
| 3716 | 1,3,4,8,10, 2,5,6,7,9,1<br>12,13,15 1,14,16 | 3 P10758,P70549,Q9R168                                    |
| 3717 | 1,3,4,8,10, 2,5,6,7,9,1<br>12,13,16 1,14,15 | 2 P00762,P02625                                           |
| 3718 | 1,3,4,8,10, 2,5,6,7,9,1<br>12,14,15 1,13,16 | 2 P54921,Q9R168                                           |
| 3719 | 1,3,4,8,10, 2,5,6,7,9,1<br>12,14,16 1,13,15 | 2 O70417,P00762                                           |
| 3720 | 1,3,4,8,10, 2,5,6,7,9,1<br>12,15,16 1,13,14 | 3 P00762,P0DMW0,P0DMW1,P10758                             |
| 3721 | 1,3,4,8,10, 2,5,6,7,9,1<br>13,14,15 1,12,16 | 1 B0BNN3                                                  |
| 3722 | 1,3,4,8,10, 2,5,6,7,9,1<br>13,14,16 1,12,15 | 4 B0BNN3,O35077,O54728,P00762                             |
| 3723 | 1,3,4,8,10, 2,5,6,7,9,1<br>13,15,16 1,12,14 | 4 O35077,P00762,Q5I0J9,Q64093                             |
| 3724 | 1,3,4,8,10, 2,5,6,7,9,1<br>14,15,16 1,12,13 | 3 O35077,P00762,P54921                                    |
| 3725 | 1,3,4,8,11, 2,5,6,7,9,1<br>12,13,14 0,15,16 | 5 B0BNN3,D3ZTX0,O54728,Q64335,Q811M5                      |
| 3726 | 1,3,4,8,11, 2,5,6,7,9,1<br>12,13,15 0,14,16 | 5 Q4FZU2,Q6IFW6,Q6IG02,Q6IMF3,Q6P6Q2                      |
| 3727 | 1,3,4,8,11, 2,5,6,7,9,1<br>12,13,16 0,14,15 | 4 P00762,P02782,P30120,Q811M5                             |
| 3728 | 1,3,4,8,11, 2,5,6,7,9,1<br>12,14,15 0,13,16 | 7 D3ZTX0,Q4FZU2,Q6IFU7,Q6IFW6,Q6IG02,Q6IMF3,Q6P6Q2        |
| 3729 | 1,3,4,8,11, 2,5,6,7,9,1<br>12,14,16 0,13,15 | 4 D3ZTX0,O54728,P00762,Q811M5                             |
| 3730 | 1,3,4,8,11, 2,5,6,7,9,1<br>12,15,16 0,13,14 | 8 D3ZTX0,P00762,P29315,Q4FZU2,Q6IFW6,Q6IG02,Q6IMF3,Q6P6Q2 |

|      |                                             |                                                                                        |
|------|---------------------------------------------|----------------------------------------------------------------------------------------|
| 3731 | 1,3,4,8,11, 2,5,6,7,9,1<br>13,14,15 0,12,16 | 9 B0BNN3,D3ZTX0,O54728,Q4FZU2,Q6IFU7,Q6IFW6,Q6IG02,Q6IMF3,Q6P6Q2                       |
| 3732 | 1,3,4,8,11, 2,5,6,7,9,1<br>13,14,16 0,12,15 | 9 B0BNN3,D3ZTX0,O54728,P00762,P02782,P30120,Q6AY61,Q811M5,Q99MH3                       |
| 3733 | 1,3,4,8,11, 2,5,6,7,9,1<br>13,15,16 0,12,14 | 11 B0BNN3,P00762,P02782,P29315,P30120,Q4FZU2,Q6IFU7,Q6IFW6,Q6IG02,Q6IMF3,Q6P6Q2        |
| 3734 | 1,3,4,8,11, 2,5,6,7,9,1<br>14,15,16 0,12,13 | 12 B0BNN3,D3ZTX0,O54728,P00762,P29315,Q4FZU2,Q6IFU7,Q6IFU8,Q6IFW6,Q6IG02,Q6IMF3,Q6P6Q2 |
| 3735 | 1,3,4,8,12, 2,5,6,7,9,1<br>13,14,15 0,11,16 | 2 P70549,Q9Z2L0                                                                        |
| 3736 | 1,3,4,8,12, 2,5,6,7,9,1<br>13,14,16 0,11,15 | 5 B0BNN3,O54728,P00762,Q99MH3,Q9Z2L0                                                   |
| 3737 | 1,3,4,8,12, 2,5,6,7,9,1<br>13,15,16 0,11,14 | 3 P00762,P10758,P50116                                                                 |
| 3738 | 1,3,4,8,12, 2,5,6,7,9,1<br>14,15,16 0,11,13 | 2 D3ZTX0,P00762                                                                        |
| 3739 | 1,3,4,8,13, 2,5,6,7,9,1<br>14,15,16 0,11,12 | 4 B0BNN3,O54728,P00762,P50116                                                          |
| 3740 | 1,3,4,9,10, 2,5,6,7,8,1<br>11,12,13 4,15,16 | 3 P50115,Q62714,Q62761;Q62762;Q62763                                                   |
| 3741 | 1,3,4,9,10, 2,5,6,7,8,1<br>11,12,14 3,15,16 | 3 P50115,Q62714,Q62761;Q62762;Q62763                                                   |
| 3742 | 1,3,4,9,10, 2,5,6,7,8,1<br>11,12,15 3,14,16 | 3 P50115,Q62714,Q62761;Q62762;Q62763                                                   |
| 3743 | 1,3,4,9,10, 2,5,6,7,8,1<br>11,12,16 3,14,15 | 2 P50115,Q62714                                                                        |
| 3744 | 1,3,4,9,10, 2,5,6,7,8,1<br>11,13,14 2,15,16 | 1 P50115                                                                               |
| 3745 | 1,3,4,9,10, 2,5,6,7,8,1<br>11,13,15 2,14,16 | 2 P50115,P50116                                                                        |
| 3746 | 1,3,4,9,10, 2,5,6,7,8,1<br>11,13,16 2,14,15 | 1 P50116                                                                               |
| 3747 | 1,3,4,9,10, 2,5,6,7,8,1<br>11,14,15 2,13,16 | 1 P50115                                                                               |
| 3748 | 1,3,4,9,10, 2,5,6,7,8,1<br>11,14,16 2,13,15 | 1 P50115                                                                               |
| 3749 | 1,3,4,9,10, 2,5,6,7,8,1<br>11,15,16 2,13,14 | 3 P25809,P29315,P50116                                                                 |
| 3750 | 1,3,4,9,10, 2,5,6,7,8,1<br>12,13,14 1,15,16 | 5 P09456,P50115,P50116,P50280,Q00715                                                   |

|      |                                             |                                                                                        |
|------|---------------------------------------------|----------------------------------------------------------------------------------------|
| 3751 | 1,3,4,9,10, 2,5,6,7,8,1<br>12,13,15 1,14,16 | 6 P09456,P10758,P50115,P50116,P50280,Q00715                                            |
| 3752 | 1,3,4,9,10, 2,5,6,7,8,1<br>12,13,16 1,14,15 | 2 P50115,P50116                                                                        |
| 3753 | 1,3,4,9,10, 2,5,6,7,8,1<br>12,14,15 1,13,16 | 6 P09456,P30120,P46462,P50115,P50116,Q00715                                            |
| 3754 | 1,3,4,9,10, 2,5,6,7,8,1<br>12,14,16 1,13,15 | 2 P50115,P50116                                                                        |
| 3755 | 1,3,4,9,10, 2,5,6,7,8,1<br>12,15,16 1,13,14 | 5 P10758,P25809,P29315,P50115,P50116                                                   |
| 3756 | 1,3,4,9,10, 2,5,6,7,8,1<br>13,14,15 1,12,16 | 7 P09456,P12020,P46462,P50115,P50116,P62804,Q00715                                     |
| 3757 | 1,3,4,9,10, 2,5,6,7,8,1<br>13,14,16 1,12,15 | 2 P50115,P50116                                                                        |
| 3758 | 1,3,4,9,10, 2,5,6,7,8,1<br>13,15,16 1,12,14 | 5 P12020,P29315,P50115,P50116,Q00715                                                   |
| 3759 | 1,3,4,9,10, 2,5,6,7,8,1<br>14,15,16 1,12,13 | 5 P12020,P29315,P47967,P50115,P50116                                                   |
| 3760 | 1,3,4,9,11, 2,5,6,7,8,1<br>12,13,14 0,15,16 | 10 O70594,P25031,P50115,P50116,P53790,Q05175,Q3ZAV1,Q62761;Q62762;Q62763,Q63270,Q64335 |
| 3761 | 1,3,4,9,11, 2,5,6,7,8,1<br>12,13,15 0,14,16 | 6 P25031,P50115,P50116,P57113,Q62761;Q62762;Q62763,Q6IG02                              |
| 3762 | 1,3,4,9,11, 2,5,6,7,8,1<br>12,13,16 0,14,15 | 4 P50115,P50116,P54921,Q62714                                                          |
| 3763 | 1,3,4,9,11, 2,5,6,7,8,1<br>12,14,15 0,13,16 | 7 O70594,P02631,P25031,P25809,P50115,P50116,Q62761;Q62762;Q62763                       |
| 3764 | 1,3,4,9,11, 2,5,6,7,8,1<br>12,14,16 0,13,15 | 8 O70594,P02631,P25809,P36860,P50115,P50116,Q62714,Q63618                              |
| 3765 | 1,3,4,9,11, 2,5,6,7,8,1<br>12,15,16 0,13,14 | 7 P02631,P25031,P25809,P29315,P50115,P50116,Q62714                                     |
| 3766 | 1,3,4,9,11, 2,5,6,7,8,1<br>13,14,15 0,12,16 | 7 P02631,P0DMW0;P0DMW1,P25031,P36970,P50115,P50116,Q6IG02                              |
| 3767 | 1,3,4,9,11, 2,5,6,7,8,1<br>13,14,16 0,12,15 | 6 O54728,P19132,P19814,P25031,P50115,P50116                                            |
| 3768 | 1,3,4,9,11, 2,5,6,7,8,1<br>13,15,16 0,12,14 | 6 P02631,P25031,P29315,P50116,Q5RLM2,Q6IG02                                            |
| 3769 | 1,3,4,9,11, 2,5,6,7,8,1<br>14,15,16 0,12,13 | 6 P02631,P25031,P25809,P29315,P50115,P50116                                            |
| 3770 | 1,3,4,9,12, 2,5,6,7,8,1<br>13,14,15 0,11,16 | 5 P09456,P25031,P50115,P50116,Q00715                                                   |

|      |                                             |                                                                  |
|------|---------------------------------------------|------------------------------------------------------------------|
| 3771 | 1,3,4,9,12, 2,5,6,7,8,1<br>13,14,16 0,11,15 | 2 P50115,P50116                                                  |
| 3772 | 1,3,4,9,12, 2,5,6,7,8,1<br>13,15,16 0,11,14 | 4 P10758,P29315,P50115,P50116                                    |
| 3773 | 1,3,4,9,12, 2,5,6,7,8,1<br>14,15,16 0,11,13 | 5 P02631,P25809,P29315,P50115,P50116                             |
| 3774 | 1,3,4,9,13, 2,5,6,7,8,1<br>14,15,16 0,11,12 | 6 P02631,P23593,P29315,P50115,P50116,Q00715                      |
| 3775 | 1,3,4,10,1 2,5,6,7,8,9<br>1,12,13,14 ,15,16 | 2 P50115,P50116                                                  |
| 3776 | 1,3,4,10,1 2,5,6,7,8,9<br>1,12,13,15 ,14,16 | 3 P50115,P50116,Q6IG02                                           |
| 3777 | 1,3,4,10,1 2,5,6,7,8,9<br>1,12,13,16 ,14,15 | 3 P50115,P50116,P97840                                           |
| 3778 | 1,3,4,10,1 2,5,6,7,8,9<br>1,12,14,15 ,13,16 | 3 P50115,P50116,Q6IG02                                           |
| 3779 | 1,3,4,10,1 2,5,6,7,8,9<br>1,12,14,16 ,13,15 | 2 P50115,P50116                                                  |
| 3780 | 1,3,4,10,1 2,5,6,7,8,9<br>1,12,15,16 ,13,14 | 5 P10758,P29315,P50115,P50116,Q6IG02                             |
| 3781 | 1,3,4,10,1 2,5,6,7,8,9<br>1,13,14,15 ,12,16 | 4 P50115,P50116,Q6IG02,Q8CJD3                                    |
| 3782 | 1,3,4,10,1 2,5,6,7,8,9<br>1,13,14,16 ,12,15 | 6 B0BNN3,O54728,P19132,P50115,P50116,Q8CJD3                      |
| 3783 | 1,3,4,10,1 2,5,6,7,8,9<br>1,13,15,16 ,12,14 | 4 P29315,P50116,Q6IG02,Q8CJD3                                    |
| 3784 | 1,3,4,10,1 2,5,6,7,8,9<br>1,14,15,16 ,12,13 | 5 P29315,P50115,P50116,Q6IG02,Q8CJD3                             |
| 3785 | 1,3,4,10,1 2,5,6,7,8,9<br>2,13,14,15 ,11,16 | 6 P06760,P07150,P09456,P50115,P50116,P70549                      |
| 3786 | 1,3,4,10,1 2,5,6,7,8,9<br>2,13,14,16 ,11,15 | 3 P06760,P50115,P50116                                           |
| 3787 | 1,3,4,10,1 2,5,6,7,8,9<br>2,13,15,16 ,11,14 | 5 P06760,P07150,P10758,P50115,P50116                             |
| 3788 | 1,3,4,10,1 2,5,6,7,8,9<br>2,14,15,16 ,11,13 | 4 P06760,P10758,P50115,P50116                                    |
| 3789 | 1,3,4,10,1 2,5,6,7,8,9<br>3,14,15,16 ,11,12 | 3 P06760,P50115,P50116                                           |
| 3790 | 1,3,4,11,1 2,5,6,7,8,9<br>2,13,14,15 ,10,16 | 9 D3ZTX0,P02454,P02631,P25031,P50115,P50116,P70545,Q6AYE5,Q6IG02 |



|      |                          |                               |    |                                                                                                                                          |
|------|--------------------------|-------------------------------|----|------------------------------------------------------------------------------------------------------------------------------------------|
| 3791 | 1,3,4,11,1<br>2,13,14,16 | 2,5,6,7,8,9<br>,10,15         | 10 | D3ZTX0,O54728,P00762,P02454,P19132,P25031,P50115,P50116,Q6AYE5,Q811M5                                                                    |
| 3792 | 1,3,4,11,1<br>2,13,15,16 | 2,5,6,7,8,9<br>,10,14         | 8  | D3ZTX0,P00762,P02454,P25031,P29315,P50115,P50116,Q6IG02                                                                                  |
| 3793 | 1,3,4,11,1<br>2,14,15,16 | 2,5,6,7,8,9<br>,10,13         | 11 | D3ZTX0,P02454,P02631,P17559,P25031,P25809,P29315,P50115,P50116,Q6AYE5,Q6IG02                                                             |
| 3794 | 1,3,4,11,1<br>3,14,15,16 | 2,5,6,7,8,9<br>,10,12         | 11 | B0BNN3,D3ZTX0,O54728,P00762,P02454,P02631,P25031,P29315,P50115,P50116,Q6IG02                                                             |
| 3795 | 1,3,4,12,1<br>3,14,15,16 | 2,5,6,7,8,9<br>,10,11         | 9  | D3ZTX0,P02454,P06760,P07150,P25031,P50115,P50116,P70545,Q6P6R2                                                                           |
| 3796 | 1,3,5,6,7,8<br>,9,10     | 2,4,11,12,<br>13,14,15,1<br>6 | 8  | O70594,P08937,P23928,P25031,P36860,P70545,Q6P6R2,Q9QX74                                                                                  |
| 3797 | 1,3,5,6,7,8<br>,9,11     | 2,4,10,12,<br>13,14,15,1<br>6 | 11 | P06760,P08937,P22283,P35280,P50115,Q63493,Q6P6R2,Q6P6S4,Q812E4,Q9QX74,Q9QYP2                                                             |
| 3798 | 1,3,5,6,7,8<br>,9,12     | 2,4,10,11,<br>13,14,15,1<br>6 | 2  | P08937,Q9QX74                                                                                                                            |
| 3799 | 1,3,5,6,7,8<br>,9,13     | 2,4,10,11,<br>12,14,15,1<br>6 | 3  | P08937,Q62714,Q9QX74                                                                                                                     |
| 3800 | 1,3,5,6,7,8<br>,9,14     | 2,4,10,11,<br>12,13,15,1<br>6 | 5  | P08937,Q5QE79,Q62714,Q63751,Q9QX74                                                                                                       |
| 3801 | 1,3,5,6,7,8<br>,9,15     | 2,4,10,11,<br>12,13,14,1<br>6 | 9  | P01681,P01946,P02091,P08721,P08937,P19132,P35280,Q62714,Q9QX74                                                                           |
| 3802 | 1,3,5,6,7,8<br>,9,16     | 2,4,10,11,<br>12,13,14,1<br>5 | 2  | P08937,Q9QX74                                                                                                                            |
| 3803 | 1,3,5,6,7,8<br>,10,11    | 2,4,9,12,1<br>3,14,15,16      | 8  | P06761,P08937,P22283,P31044,P47967,P50115,Q63493,Q9QX74                                                                                  |
| 3804 | 1,3,5,6,7,8<br>,10,12    | 2,4,9,11,1<br>3,14,15,16      | 14 | P08937,P19629,P25031,P30904,P36860,P46844,P47967,P48508,P57113,Q05175,Q5RLM2,Q66H<br>G3,Q6MG61,Q9QX74                                    |
| 3805 | 1,3,5,6,7,8<br>,10,13    | 2,4,9,11,1<br>2,14,15,16      | 17 | O70257,O70594,P08937,P25031,P36860,P46844,P47967,P48508,P57113,P63081,Q3ZAV1,Q627<br>14,Q63618,Q6MG61,Q8R431,Q9QX74,Q9WUW8               |
| 3806 | 1,3,5,6,7,8<br>,10,14    | 2,4,9,11,1<br>2,13,15,16      | 19 | D3ZUC6,O70594,P08937,P23928,P25031,P46844,P48508,P54921,P57113,P63081,Q05175,Q5Q<br>E79,Q5RLM2,Q62714,Q63751,Q64602,Q923S2,Q9QX74,Q9WUW8 |

3807 1,3,5,6,7,8 2,4,9,11,1  
,10,15 2,13,14,16

3808 1,3,5,6,7,8 2,4,9,11,1  
,10,16 2,13,14,15

3809 1,3,5,6,7,8 2,4,9,10,1  
,11,12 3,14,15,16

3810 1,3,5,6,7,8 2,4,9,10,1  
,11,13 2,14,15,16

3811 1,3,5,6,7,8 2,4,9,10,1  
,11,14 2,13,15,16

3812 1,3,5,6,7,8 2,4,9,10,1  
,11,15 2,13,14,16

3813 1,3,5,6,7,8 2,4,9,10,1  
,11,16 2,13,14,15

3814 1,3,5,6,7,8 2,4,9,10,1  
,12,13 1,14,15,16

3815 1,3,5,6,7,8 2,4,9,10,1  
,12,14 1,13,15,16

3816 1,3,5,6,7,8 2,4,9,10,1  
,12,15 1,13,14,16

3817 1,3,5,6,7,8 2,4,9,10,1  
,12,16 1,13,14,15

3818 1,3,5,6,7,8 2,4,9,10,1  
,13,14 1,12,15,16

3819 1,3,5,6,7,8 2,4,9,10,1  
,13,15 1,12,14,16

3820 1,3,5,6,7,8 2,4,9,10,1  
,13,16 1,12,14,15

3821 1,3,5,6,7,8 2,4,9,10,1  
,14,15 1,12,13,16

3822 1,3,5,6,7,8 2,4,9,10,1  
,14,16 1,12,13,15

3823 1,3,5,6,7,8 2,4,9,10,1  
,15,16 1,12,13,14

3824 1,3,5,6,7,9 2,4,8,12,1  
,10,11 3,14,15,16

O35077,O35763,O70377,O70594,O88339;Q4V882,P01946,P02091,P02793;Q7TP54,P08721,P08  
937,P18757,P19468,P19629,P23928,P25031,P30904,P36860,P38918,P46844,P48508,P53790,P5  
41 4921,P57113,Q03248,Q05175,Q3ZAV1,Q5I0E9,Q5RKI1,Q62714,Q63270,Q63618,Q64602,Q6AY  
41,Q6MG61,Q6Q0N1,Q80W57,Q8R431,Q923S2,Q9QX74,Q9WTW7,Q9Z0W7  
O35077,O35763,O70257,O70377,O70594,P08937,P18757,P19468,P19629,P23928,P25031,P299  
75,P38918,P46720,P46844,P48508,P53790,P57113,P60711;P63259,Q03248,Q05175,Q3T1J9,Q3  
44 ZAV1,Q5I0E9,Q5M7T9,Q62714,Q63270,Q63424,Q64093,Q64602,Q68FT5,Q6AY41,Q6MG61,Q6  
Q0N1,Q71MB6,Q80W57,Q8R431,Q923S2,Q9JJ40,Q9QX74,Q9WTW7,Q9WUW8,Q9WUW9,Q9Z  
0W7  
P06761,P06911,P08010,P08937,P12020,P22283,P47967,P97840,Q5GRG2,Q5I0D1,Q5M8C6,Q63  
17 493,Q6IG05,Q9JHB9,Q9JI85,Q9QW07,Q9QX74

9 P06761,P08937,P22283,P47967,P50115,Q5M8C6,Q63493,Q9JI85,Q9QX74

12 D3ZUC6,P06761,P06911,P08649,P08937,P19218,P22283,Q5GRG2,Q5M8C6,Q63493,Q63751,Q9  
QX74

18 P01946,P02091,P02793;Q7TP54,P08721,P08937,P22283,P50115,Q4FZU2,Q63493,Q6IFU7,Q6IF  
W6,Q6IG02,Q6IG05,Q6IMF3,Q6P6Q2,Q8CJ52,Q9QW07,Q9QX74

22 O35547,P02780,P02781,P02782,P02783,P06761,P07647,P08010,P08649,P08723,P08937,P0945  
6,P22283,P30120,P46462,P50115,Q5M8C6,Q63493,Q9JHB9,Q9JI85,Q9QW07,Q9QX74

3 P08937,P47967,P97840

5 D3ZUC6,P08937,P19218,Q5RLM2,Q63751

9 D3ZUC6,P01946,P02091,P08721,P19629,Q62714,Q6IG05,Q9QX74,Q9R168

3 P08937,P46844,P57113

7 D3ZUC6,P08937,P63081,Q5QE79,Q62714,Q63751,Q9WUW8

7 O70594,P01946,P02091,P08721,P70549,Q62714,Q9QX74

8 O35077,O70594,P08937,P46844,P57113,P63081,Q62714,Q9WUW8

8 D3ZUC6,P01946,P02091,P08937,P54921,Q62714,Q63751,Q9QX74

12 O35077,P02783,P08937,P46844,P52590,P57113,P63081,Q62714,Q62812,Q63751,Q9QX74,Q9  
WUW8

18 O35077,O70594,P01946,P02091,P02783,P08721,P09606,P19468,P19629,P46844,P48508,P5379  
0,P57113,Q05175,Q62714,Q63270,Q8R431,Q9QX74

0

|      |                       |                          |                                             |
|------|-----------------------|--------------------------|---------------------------------------------|
| 3825 | 1,3,5,6,7,9<br>,10,12 | 2,4,8,11,1<br>3,14,15,16 | 1 O54728                                    |
| 3826 | 1,3,5,6,7,9<br>,10,13 | 2,4,8,11,1<br>2,14,15,16 | 1 P36860                                    |
| 3827 | 1,3,5,6,7,9<br>,10,14 | 2,4,8,11,1<br>2,13,15,16 | 1 Q63751                                    |
| 3828 | 1,3,5,6,7,9<br>,10,15 | 2,4,8,11,1<br>2,13,14,16 | 6 O54728,P01946,P02091,P08721,P36860,Q5RKI1 |
| 3829 | 1,3,5,6,7,9<br>,10,16 | 2,4,8,11,1<br>2,13,14,15 | 0                                           |
| 3830 | 1,3,5,6,7,9<br>,11,12 | 2,4,8,10,1<br>3,14,15,16 | 1 Q03191                                    |
| 3831 | 1,3,5,6,7,9<br>,11,13 | 2,4,8,10,1<br>2,14,15,16 | 0                                           |
| 3832 | 1,3,5,6,7,9<br>,11,14 | 2,4,8,10,1<br>2,13,15,16 | 1 Q63751                                    |
| 3833 | 1,3,5,6,7,9<br>,11,15 | 2,4,8,10,1<br>2,13,14,16 | 3 P01946,P02091,P08721                      |
| 3834 | 1,3,5,6,7,9<br>,11,16 | 2,4,8,10,1<br>2,13,14,15 | 0                                           |
| 3835 | 1,3,5,6,7,9<br>,12,13 | 2,4,8,10,1<br>1,14,15,16 | 0                                           |
| 3836 | 1,3,5,6,7,9<br>,12,14 | 2,4,8,10,1<br>1,13,15,16 | 1 Q63751                                    |
| 3837 | 1,3,5,6,7,9<br>,12,15 | 2,4,8,10,1<br>1,13,14,16 | 3 O54728,P01946,P02091                      |
| 3838 | 1,3,5,6,7,9<br>,12,16 | 2,4,8,10,1<br>1,13,14,15 | 0                                           |
| 3839 | 1,3,5,6,7,9<br>,13,14 | 2,4,8,10,1<br>1,12,15,16 | 0                                           |
| 3840 | 1,3,5,6,7,9<br>,13,15 | 2,4,8,10,1<br>1,12,14,16 | 4 P01946,P02091,P08721,P62804               |
| 3841 | 1,3,5,6,7,9<br>,13,16 | 2,4,8,10,1<br>1,12,14,15 | 0                                           |
| 3842 | 1,3,5,6,7,9<br>,14,15 | 2,4,8,10,1<br>1,12,13,16 | 2 P01946,P02091                             |
| 3843 | 1,3,5,6,7,9<br>,14,16 | 2,4,8,10,1<br>1,12,13,15 | 0                                           |
| 3844 | 1,3,5,6,7,9<br>,15,16 | 2,4,8,10,1<br>1,12,13,14 | 3 P01946,P02091,P08721                      |

|      |                        |                         |    |                                                                                                                            |
|------|------------------------|-------------------------|----|----------------------------------------------------------------------------------------------------------------------------|
| 3845 | 1,3,5,6,7,1<br>0,11,12 | 2,4,8,9,13,<br>14,15,16 | 4  | P23593,P47967,P97840,Q5I0D1                                                                                                |
| 3846 | 1,3,5,6,7,1<br>0,11,13 | 2,4,8,9,12,<br>14,15,16 | 2  | P47967,P97840                                                                                                              |
| 3847 | 1,3,5,6,7,1<br>0,11,14 | 2,4,8,9,12,<br>13,15,16 | 0  |                                                                                                                            |
| 3848 | 1,3,5,6,7,1<br>0,11,15 | 2,4,8,9,12,<br>13,14,16 | 4  | P01946,P02091,P08721,Q5RKI1                                                                                                |
| 3849 | 1,3,5,6,7,1<br>0,11,16 | 2,4,8,9,12,<br>13,14,15 | 1  | P02783                                                                                                                     |
| 3850 | 1,3,5,6,7,1<br>0,12,13 | 2,4,8,9,11,<br>14,15,16 | 4  | P36860,P47967,P97840,Q6AY61                                                                                                |
| 3851 | 1,3,5,6,7,1<br>0,12,14 | 2,4,8,9,11,<br>13,15,16 | 3  | P57113,Q5RLM2,Q6AY61                                                                                                       |
| 3852 | 1,3,5,6,7,1<br>0,12,15 | 2,4,8,9,11,<br>13,14,16 | 7  | O54728,P01946,P02091,P08721,P36860,Q5RKI1,Q6AY61                                                                           |
| 3853 | 1,3,5,6,7,1<br>0,12,16 | 2,4,8,9,11,<br>13,14,15 | 3  | P0DMW0;P0DMW1,P57113,P97840                                                                                                |
| 3854 | 1,3,5,6,7,1<br>0,13,14 | 2,4,8,9,11,<br>12,15,16 | 3  | P57113,Q62714,Q9WUW8                                                                                                       |
| 3855 | 1,3,5,6,7,1<br>0,13,15 | 2,4,8,9,11,<br>12,14,16 | 7  | P01946,P02091,P08721,P36860,P57113,Q5RKI1,Q62714                                                                           |
| 3856 | 1,3,5,6,7,1<br>0,13,16 | 2,4,8,9,11,<br>12,14,15 | 3  | P46844,P57113,Q9WUW8                                                                                                       |
| 3857 | 1,3,5,6,7,1<br>0,14,15 | 2,4,8,9,11,<br>12,13,16 | 7  | P01946,P02091,P08721,P54921,P57113,Q5RKI1,Q62714                                                                           |
| 3858 | 1,3,5,6,7,1<br>0,14,16 | 2,4,8,9,11,<br>12,13,15 | 4  | P02783,P57113,Q71MB6,Q9WUW8                                                                                                |
| 3859 | 1,3,5,6,7,1<br>0,15,16 | 2,4,8,9,11,<br>12,13,14 | 17 | O35077,O70594,P01946,P02091,P08721,P17988,P18297,P19468,P48508,P53790,P57113,Q0324<br>8,Q5I0E9,Q5RKI1,Q63270,Q71MB6,Q8R431 |
| 3860 | 1,3,5,6,7,1<br>1,12,13 | 2,4,8,9,10,<br>14,15,16 | 3  | P47967,P97840,Q5I0D1                                                                                                       |
| 3861 | 1,3,5,6,7,1<br>1,12,14 | 2,4,8,9,10,<br>13,15,16 | 1  | P19218                                                                                                                     |
| 3862 | 1,3,5,6,7,1<br>1,12,15 | 2,4,8,9,10,<br>13,14,16 | 5  | P01946,P02091,P08721,P47967,P97840                                                                                         |
| 3863 | 1,3,5,6,7,1<br>1,12,16 | 2,4,8,9,10,<br>13,14,15 | 2  | P47967,P97840                                                                                                              |
| 3864 | 1,3,5,6,7,1<br>1,13,14 | 2,4,8,9,10,<br>12,15,16 | 0  |                                                                                                                            |

|      |                        |                          |   |                                                         |
|------|------------------------|--------------------------|---|---------------------------------------------------------|
| 3865 | 1,3,5,6,7,1<br>1,13,15 | 2,4,8,9,10,<br>12,14,16  | 4 | P01946,P02091,P08721,P47967                             |
| 3866 | 1,3,5,6,7,1<br>1,13,16 | 2,4,8,9,10,<br>12,14,15  | 2 | P22283,P47967                                           |
| 3867 | 1,3,5,6,7,1<br>1,14,15 | 2,4,8,9,10,<br>12,13,16  | 3 | P01946,P02091,P08721                                    |
| 3868 | 1,3,5,6,7,1<br>1,14,16 | 2,4,8,9,10,<br>12,13,15  | 1 | P02783                                                  |
| 3869 | 1,3,5,6,7,1<br>1,15,16 | 2,4,8,9,10,<br>12,13,14  | 8 | P01946,P02091,P02783,P08721,P17988,Q4FZU2,Q6IFW6,Q8CJ52 |
| 3870 | 1,3,5,6,7,1<br>2,13,14 | 2,4,8,9,10,<br>11,15,16  | 3 | D3ZUC6,P01835,Q6AY61                                    |
| 3871 | 1,3,5,6,7,1<br>2,13,15 | 2,4,8,9,10,<br>11,14,16  | 6 | P01946,P02091,P47967,P70549,P97840,Q6AY61               |
| 3872 | 1,3,5,6,7,1<br>2,13,16 | 2,4,8,9,10,<br>11,14,15  | 2 | P47967,P97840                                           |
| 3873 | 1,3,5,6,7,1<br>2,14,15 | 2,4,8,9,10,<br>11,13,16  | 4 | D3ZUC6,P01946,P02091,Q6AY61                             |
| 3874 | 1,3,5,6,7,1<br>2,14,16 | 2,4,8,9,10,<br>11,13,15  | 1 | P02783                                                  |
| 3875 | 1,3,5,6,7,1<br>2,15,16 | 2,4,8,9,10,<br>11,13,14  | 4 | P01946,P02091,P08721,Q6AY61                             |
| 3876 | 1,3,5,6,7,1<br>3,14,15 | 2,4,8,9,10,<br>11,12,16  | 6 | D3ZUC6,P01835,P01946,P02091,P70549,Q62714               |
| 3877 | 1,3,5,6,7,1<br>3,14,16 | 2,4,8,9,10,<br>11,12,15  | 3 | P01835,Q62714,Q9WUW8                                    |
| 3878 | 1,3,5,6,7,1<br>3,15,16 | 2,4,8,9,10,<br>11,12,14  | 5 | P01835,P01946,P02091,P08721,Q62714                      |
| 3879 | 1,3,5,6,7,1<br>4,15,16 | 2,4,8,9,10,<br>11,12,13  | 5 | P01946,P02091,P02783,P08721,Q62714                      |
| 3880 | 1,3,5,6,8,9<br>,10,11  | 2,4,7,12,1<br>3,14,15,16 | 2 | P08937,Q6P6S4                                           |
| 3881 | 1,3,5,6,8,9<br>,10,12  | 2,4,7,11,1<br>3,14,15,16 | 1 | P25031                                                  |
| 3882 | 1,3,5,6,8,9<br>,10,13  | 2,4,7,11,1<br>2,14,15,16 | 1 | P25031                                                  |
| 3883 | 1,3,5,6,8,9<br>,10,14  | 2,4,7,11,1<br>2,13,15,16 | 3 | P08937,P25031,Q63751                                    |
| 3884 | 1,3,5,6,8,9<br>,10,15  | 2,4,7,11,1<br>2,13,14,16 | 5 | P01681,P01946,P02091,P25031,P62804                      |

|      |                        |                          |    |                                                                              |
|------|------------------------|--------------------------|----|------------------------------------------------------------------------------|
| 3885 | 1,3,5,6,8,9<br>,10,16  | 2,4,7,11,1<br>2,13,14,15 | 1  | P25031                                                                       |
| 3886 | 1,3,5,6,8,9<br>,11,12  | 2,4,7,10,1<br>3,14,15,16 | 3  | O88797,P09527,Q6IG05                                                         |
| 3887 | 1,3,5,6,8,9<br>,11,13  | 2,4,7,10,1<br>2,14,15,16 | 1  | P09527                                                                       |
| 3888 | 1,3,5,6,8,9<br>,11,14  | 2,4,7,10,1<br>2,13,15,16 | 3  | P08937,Q5I0J9,Q63751                                                         |
| 3889 | 1,3,5,6,8,9<br>,11,15  | 2,4,7,10,1<br>2,13,14,16 | 10 | P01681,P01946,P02091,Q4FZU2,Q6IFU7,Q6IFW6,Q6IG05,Q6IMF3,Q6P6Q2,Q6P6S4        |
| 3890 | 1,3,5,6,8,9<br>,11,16  | 2,4,7,10,1<br>2,13,14,15 | 1  | O88797                                                                       |
| 3891 | 1,3,5,6,8,9<br>,12,13  | 2,4,7,10,1<br>1,14,15,16 | 0  |                                                                              |
| 3892 | 1,3,5,6,8,9<br>,12,14  | 2,4,7,10,1<br>1,13,15,16 | 3  | P08937,Q09030,Q63751                                                         |
| 3893 | 1,3,5,6,8,9<br>,12,15  | 2,4,7,10,1<br>1,13,14,16 | 6  | P01681,P01946,P02091,P36376,Q6IG05,Q9R168                                    |
| 3894 | 1,3,5,6,8,9<br>,12,16  | 2,4,7,10,1<br>1,13,14,15 | 1  | Q09030                                                                       |
| 3895 | 1,3,5,6,8,9<br>,13,14  | 2,4,7,10,1<br>1,12,15,16 | 2  | P08937,Q09030                                                                |
| 3896 | 1,3,5,6,8,9<br>,13,15  | 2,4,7,10,1<br>1,12,14,16 | 4  | P01946,P02091,P62804,Q00715                                                  |
| 3897 | 1,3,5,6,8,9<br>,13,16  | 2,4,7,10,1<br>1,12,14,15 | 1  | Q09030                                                                       |
| 3898 | 1,3,5,6,8,9<br>,14,15  | 2,4,7,10,1<br>1,12,13,16 | 5  | P00714,P01681,P01946,P02091,P08937                                           |
| 3899 | 1,3,5,6,8,9<br>,14,16  | 2,4,7,10,1<br>1,12,13,15 | 2  | P08937,Q09030                                                                |
| 3900 | 1,3,5,6,8,9<br>,15,16  | 2,4,7,10,1<br>1,12,13,14 | 2  | P01946,P02091                                                                |
| 3901 | 1,3,5,6,8,1<br>0,11,12 | 2,4,7,9,13,<br>14,15,16  | 2  | Q6IG05,Q9R168                                                                |
| 3902 | 1,3,5,6,8,1<br>0,11,13 | 2,4,7,9,12,<br>14,15,16  | 1  | Q6IFU7                                                                       |
| 3903 | 1,3,5,6,8,1<br>0,11,14 | 2,4,7,9,12,<br>13,15,16  | 2  | P08937,Q6IFU7                                                                |
| 3904 | 1,3,5,6,8,1<br>0,11,15 | 2,4,7,9,12,<br>13,14,16  | 10 | P01946,P02091,P02793;Q7TP54,Q4FZU2,Q6IFU7,Q6IFW6,Q6IG02,Q6IG05,Q6IMF3,Q6P6Q2 |

|      |                        |                         |    |                                                                                     |
|------|------------------------|-------------------------|----|-------------------------------------------------------------------------------------|
| 3905 | 1,3,5,6,8,1<br>0,11,16 | 2,4,7,9,12,<br>13,14,15 | 4  | P02783,P08010,P25031,Q6IFU7                                                         |
| 3906 | 1,3,5,6,8,1<br>0,12,13 | 2,4,7,9,11,<br>14,15,16 | 2  | P25031,Q9R168                                                                       |
| 3907 | 1,3,5,6,8,1<br>0,12,14 | 2,4,7,9,11,<br>13,15,16 | 4  | P08937,P25031,Q5RLM2,Q9R168                                                         |
| 3908 | 1,3,5,6,8,1<br>0,12,15 | 2,4,7,9,11,<br>13,14,16 | 5  | P01946,P02091,P25031,Q6IG05,Q9R168                                                  |
| 3909 | 1,3,5,6,8,1<br>0,12,16 | 2,4,7,9,11,<br>13,14,15 | 3  | P0DMW0;P0DMW1,P25031,Q9R168                                                         |
| 3910 | 1,3,5,6,8,1<br>0,13,14 | 2,4,7,9,11,<br>12,15,16 | 3  | P08937,P25031,Q62714                                                                |
| 3911 | 1,3,5,6,8,1<br>0,13,15 | 2,4,7,9,11,<br>12,14,16 | 6  | P01946,P02091,P62804,P70549,Q498D9,Q62714                                           |
| 3912 | 1,3,5,6,8,1<br>0,13,16 | 2,4,7,9,11,<br>12,14,15 | 2  | O35077,P25031                                                                       |
| 3913 | 1,3,5,6,8,1<br>0,14,15 | 2,4,7,9,11,<br>12,13,16 | 6  | P00714,P01946,P02091,P08937,P54921,Q62714                                           |
| 3914 | 1,3,5,6,8,1<br>0,14,16 | 2,4,7,9,11,<br>12,13,15 | 5  | O35077,P02783,P08937,P25031,P57113                                                  |
| 3915 | 1,3,5,6,8,1<br>0,15,16 | 2,4,7,9,11,<br>12,13,14 | 8  | O35077,O70594,P01946,P02091,P25031,P53790,Q05175,Q8R431                             |
| 3916 | 1,3,5,6,8,1<br>1,12,13 | 2,4,7,9,10,<br>14,15,16 | 4  | P47967,Q5I0D1,Q6IG05,Q9R168                                                         |
| 3917 | 1,3,5,6,8,1<br>1,12,14 | 2,4,7,9,10,<br>13,15,16 | 4  | D3ZUC6,P08937,P19218,Q6IG05                                                         |
| 3918 | 1,3,5,6,8,1<br>1,12,15 | 2,4,7,9,10,<br>13,14,16 | 10 | P01946,P02091,Q4FZU2,Q6IFU7,Q6IFW6,Q6IG02,Q6IG05,Q6IMF3,Q6P6Q2,Q9R168               |
| 3919 | 1,3,5,6,8,1<br>1,12,16 | 2,4,7,9,10,<br>13,14,15 | 4  | O88797,P08010,Q6IG05,Q9QW07                                                         |
| 3920 | 1,3,5,6,8,1<br>1,13,14 | 2,4,7,9,10,<br>12,15,16 | 3  | P08937,P19218,Q6IFU7                                                                |
| 3921 | 1,3,5,6,8,1<br>1,13,15 | 2,4,7,9,10,<br>12,14,16 | 9  | P01946,P02091,Q4FZU2,Q6IFU7,Q6IFW6,Q6IG02,Q6IG05,Q6IMF3,Q6P6Q2                      |
| 3922 | 1,3,5,6,8,1<br>1,13,16 | 2,4,7,9,10,<br>12,14,15 | 3  | P02782,P30120,Q6IFU7                                                                |
| 3923 | 1,3,5,6,8,1<br>1,14,15 | 2,4,7,9,10,<br>12,13,16 | 12 | D3ZUC6,P01946,P02091,P08937,P19218,Q4FZU2,Q6IFU7,Q6IFW6,Q6IG02,Q6IG05,Q6IMF3,Q6P6Q2 |
| 3924 | 1,3,5,6,8,1<br>1,14,16 | 2,4,7,9,10,<br>12,13,15 | 4  | P02783,P08937,P19218,Q6IFU7                                                         |

|      |                        |                         |    |                                                                       |
|------|------------------------|-------------------------|----|-----------------------------------------------------------------------|
| 3925 | 1,3,5,6,8,1<br>1,15,16 | 2,4,7,9,10,<br>12,13,14 | 10 | P01946,P02091,P02783,Q4FZU2,Q6IFU7,Q6IFW6,Q6IG02,Q6IG05,Q6IMF3,Q6P6Q2 |
| 3926 | 1,3,5,6,8,1<br>2,13,14 | 2,4,7,9,10,<br>11,15,16 | 3  | D3ZUC6,P08937,Q9R168                                                  |
| 3927 | 1,3,5,6,8,1<br>2,13,15 | 2,4,7,9,10,<br>11,14,16 | 5  | P01946,P02091,P70549,Q6IG05,Q9R168                                    |
| 3928 | 1,3,5,6,8,1<br>2,13,16 | 2,4,7,9,10,<br>11,14,15 | 0  |                                                                       |
| 3929 | 1,3,5,6,8,1<br>2,14,15 | 2,4,7,9,10,<br>11,13,16 | 6  | D3ZUC6,P00714,P01946,P02091,Q6IG05,Q9R168                             |
| 3930 | 1,3,5,6,8,1<br>2,14,16 | 2,4,7,9,10,<br>11,13,15 | 1  | P02783                                                                |
| 3931 | 1,3,5,6,8,1<br>2,15,16 | 2,4,7,9,10,<br>11,13,14 | 4  | P01946,P02091,Q6IG05,Q9R168                                           |
| 3932 | 1,3,5,6,8,1<br>3,14,15 | 2,4,7,9,10,<br>11,12,16 | 6  | D3ZUC6,P01946,P02091,P62804,P70549,Q62714                             |
| 3933 | 1,3,5,6,8,1<br>3,14,16 | 2,4,7,9,10,<br>11,12,15 | 1  | Q62714                                                                |
| 3934 | 1,3,5,6,8,1<br>3,15,16 | 2,4,7,9,10,<br>11,12,14 | 4  | O35077,P01946,P02091,Q62714                                           |
| 3935 | 1,3,5,6,8,1<br>4,15,16 | 2,4,7,9,10,<br>11,12,13 | 5  | O35077,P01946,P02091,P02783,Q62714                                    |
| 3936 | 1,3,5,6,9,1<br>0,11,12 | 2,4,7,8,13,<br>14,15,16 | 1  | Q03191                                                                |
| 3937 | 1,3,5,6,9,1<br>0,11,13 | 2,4,7,8,12,<br>14,15,16 | 0  |                                                                       |
| 3938 | 1,3,5,6,9,1<br>0,11,14 | 2,4,7,8,12,<br>13,15,16 | 0  |                                                                       |
| 3939 | 1,3,5,6,9,1<br>0,11,15 | 2,4,7,8,12,<br>13,14,16 | 2  | P01946,P02091                                                         |
| 3940 | 1,3,5,6,9,1<br>0,11,16 | 2,4,7,8,12,<br>13,14,15 | 1  | Q9Z2L0                                                                |
| 3941 | 1,3,5,6,9,1<br>0,12,13 | 2,4,7,8,11,<br>14,15,16 | 2  | P0C0A9,Q4G075                                                         |
| 3942 | 1,3,5,6,9,1<br>0,12,14 | 2,4,7,8,11,<br>13,15,16 | 2  | P0C0A9,P30120                                                         |
| 3943 | 1,3,5,6,9,1<br>0,12,15 | 2,4,7,8,11,<br>13,14,16 | 9  | B0BNN3,O54728,P01946,P02091,P09456,P0C0A9,P30120,Q4G075,Q99041        |
| 3944 | 1,3,5,6,9,1<br>0,12,16 | 2,4,7,8,11,<br>13,14,15 | 1  | Q4G075                                                                |



|      |                        |                         |   |                                                                |
|------|------------------------|-------------------------|---|----------------------------------------------------------------|
| 3945 | 1,3,5,6,9,1<br>0,13,14 | 2,4,7,8,11,<br>12,15,16 | 4 | P02780,P0C0A9,Q00715,Q06000                                    |
| 3946 | 1,3,5,6,9,1<br>0,13,15 | 2,4,7,8,11,<br>12,14,16 | 8 | P01946,P02091,P02780,P0C0A9,P11883,P30120,P62804,Q00715        |
| 3947 | 1,3,5,6,9,1<br>0,13,16 | 2,4,7,8,11,<br>12,14,15 | 1 | P11883                                                         |
| 3948 | 1,3,5,6,9,1<br>0,14,15 | 2,4,7,8,11,<br>12,13,16 | 9 | P00714,P01946,P02091,P02780,P02782,P22273,P30120,P62804,Q00715 |
| 3949 | 1,3,5,6,9,1<br>0,14,16 | 2,4,7,8,11,<br>12,13,15 | 0 |                                                                |
| 3950 | 1,3,5,6,9,1<br>0,15,16 | 2,4,7,8,11,<br>12,13,14 | 3 | P01946,P02091,Q811M5                                           |
| 3951 | 1,3,5,6,9,1<br>1,12,13 | 2,4,7,8,10,<br>14,15,16 | 1 | P20762                                                         |
| 3952 | 1,3,5,6,9,1<br>1,12,14 | 2,4,7,8,10,<br>13,15,16 | 4 | O55004,P51907,Q5I0J9,Q64093                                    |
| 3953 | 1,3,5,6,9,1<br>1,12,15 | 2,4,7,8,10,<br>13,14,16 | 2 | P01946,P02091                                                  |
| 3954 | 1,3,5,6,9,1<br>1,12,16 | 2,4,7,8,10,<br>13,14,15 | 1 | Q9Z1F2                                                         |
| 3955 | 1,3,5,6,9,1<br>1,13,14 | 2,4,7,8,10,<br>12,15,16 | 2 | P0DMW0;P0DMW1,P20762                                           |
| 3956 | 1,3,5,6,9,1<br>1,13,15 | 2,4,7,8,10,<br>12,14,16 | 4 | P01946,P02091,P20762,P62804                                    |
| 3957 | 1,3,5,6,9,1<br>1,13,16 | 2,4,7,8,10,<br>12,14,15 | 1 | Q9Z1F2                                                         |
| 3958 | 1,3,5,6,9,1<br>1,14,15 | 2,4,7,8,10,<br>12,13,16 | 3 | P01946,P02091,P0DMW0;P0DMW1                                    |
| 3959 | 1,3,5,6,9,1<br>1,14,16 | 2,4,7,8,10,<br>12,13,15 | 2 | Q5I0J9,Q9Z1F2                                                  |
| 3960 | 1,3,5,6,9,1<br>1,15,16 | 2,4,7,8,10,<br>12,13,14 | 4 | P01946,P02091,P25809,Q9Z1F2                                    |
| 3961 | 1,3,5,6,9,1<br>2,13,14 | 2,4,7,8,10,<br>11,15,16 | 2 | P0C0A9,P20762                                                  |
| 3962 | 1,3,5,6,9,1<br>2,13,15 | 2,4,7,8,10,<br>11,14,16 | 5 | P01946,P02091,P0C0A9,P62804,Q00715                             |
| 3963 | 1,3,5,6,9,1<br>2,13,16 | 2,4,7,8,10,<br>11,14,15 | 0 |                                                                |
| 3964 | 1,3,5,6,9,1<br>2,14,15 | 2,4,7,8,10,<br>11,13,16 | 5 | P00714,P01946,P02091,P22273,P30120                             |

|      |                         |                         |                                                    |
|------|-------------------------|-------------------------|----------------------------------------------------|
| 3965 | 1,3,5,6,9,1<br>2,14,16  | 2,4,7,8,10,<br>11,13,15 | 1 Q09030                                           |
| 3966 | 1,3,5,6,9,1<br>2,15,16  | 2,4,7,8,10,<br>11,13,14 | 3 P01946,P02091,P25809                             |
| 3967 | 1,3,5,6,9,1<br>3,14,15  | 2,4,7,8,10,<br>11,12,16 | 6 P01946,P02091,P02780,P30120,P62804,Q00715        |
| 3968 | 1,3,5,6,9,1<br>3,14,16  | 2,4,7,8,10,<br>11,12,15 | 1 Q09030                                           |
| 3969 | 1,3,5,6,9,1<br>3,15,16  | 2,4,7,8,10,<br>11,12,14 | 4 P01946,P02091,P11883,P62804                      |
| 3970 | 1,3,5,6,9,1<br>4,15,16  | 2,4,7,8,10,<br>11,12,13 | 2 P01946,P02091                                    |
| 3971 | 1,3,5,6,10,<br>11,12,13 | 2,4,7,8,9,1<br>4,15,16  | 1 P47967                                           |
| 3972 | 1,3,5,6,10,<br>11,12,14 | 2,4,7,8,9,1<br>3,15,16  | 0                                                  |
| 3973 | 1,3,5,6,10,<br>11,12,15 | 2,4,7,8,9,1<br>3,14,16  | 2 P01946,P02091                                    |
| 3974 | 1,3,5,6,10,<br>11,12,16 | 2,4,7,8,9,1<br>3,14,15  | 0                                                  |
| 3975 | 1,3,5,6,10,<br>11,13,14 | 2,4,7,8,9,1<br>2,15,16  | 0                                                  |
| 3976 | 1,3,5,6,10,<br>11,13,15 | 2,4,7,8,9,1<br>2,14,16  | 2 P01946,P02091                                    |
| 3977 | 1,3,5,6,10,<br>11,13,16 | 2,4,7,8,9,1<br>2,14,15  | 0                                                  |
| 3978 | 1,3,5,6,10,<br>11,14,15 | 2,4,7,8,9,1<br>2,13,16  | 2 P01946,P02091                                    |
| 3979 | 1,3,5,6,10,<br>11,14,16 | 2,4,7,8,9,1<br>2,13,15  | 1 P02783                                           |
| 3980 | 1,3,5,6,10,<br>11,15,16 | 2,4,7,8,9,1<br>2,13,14  | 2 P01946,P02091                                    |
| 3981 | 1,3,5,6,10,<br>12,13,14 | 2,4,7,8,9,1<br>1,15,16  | 0                                                  |
| 3982 | 1,3,5,6,10,<br>12,13,15 | 2,4,7,8,9,1<br>1,14,16  | 6 P01946,P02091,P07150,P62804,P70549,Q812E4        |
| 3983 | 1,3,5,6,10,<br>12,13,16 | 2,4,7,8,9,1<br>1,14,15  | 1 P07150                                           |
| 3984 | 1,3,5,6,10,<br>12,14,15 | 2,4,7,8,9,1<br>1,13,16  | 7 P00714,P01946,P02091,P09456,P30120,P82471,Q812E4 |

|      |                                             |                                             |
|------|---------------------------------------------|---------------------------------------------|
| 3985 | 1,3,5,6,10, 2,4,7,8,9,1<br>12,14,16 1,13,15 | 0                                           |
| 3986 | 1,3,5,6,10, 2,4,7,8,9,1<br>12,15,16 1,13,14 | 3 P01946,P02091,P82471                      |
| 3987 | 1,3,5,6,10, 2,4,7,8,9,1<br>13,14,15 1,12,16 | 6 P01946,P02091,P02780,P62804,Q00715,Q812E4 |
| 3988 | 1,3,5,6,10, 2,4,7,8,9,1<br>13,14,16 1,12,15 | 1 P14668                                    |
| 3989 | 1,3,5,6,10, 2,4,7,8,9,1<br>13,15,16 1,12,14 | 6 P01946,P02091,P07150,P11883,P62804,P82471 |
| 3990 | 1,3,5,6,10, 2,4,7,8,9,1<br>14,15,16 1,12,13 | 4 P01946,P02091,P02783,P82471               |
| 3991 | 1,3,5,6,11, 2,4,7,8,9,1<br>12,13,14 0,15,16 | 2 P20646,P20762                             |
| 3992 | 1,3,5,6,11, 2,4,7,8,9,1<br>12,13,15 0,14,16 | 3 P01946,P02091,P20762                      |
| 3993 | 1,3,5,6,11, 2,4,7,8,9,1<br>12,13,16 0,14,15 | 2 P47967,Q9Z1F2                             |
| 3994 | 1,3,5,6,11, 2,4,7,8,9,1<br>12,14,15 0,13,16 | 2 P01946,P02091                             |
| 3995 | 1,3,5,6,11, 2,4,7,8,9,1<br>12,14,16 0,13,15 | 2 P02783,Q9Z1F2                             |
| 3996 | 1,3,5,6,11, 2,4,7,8,9,1<br>12,15,16 0,13,14 | 4 P01946,P02091,P25809,Q9Z1F2               |
| 3997 | 1,3,5,6,11, 2,4,7,8,9,1<br>13,14,15 0,12,16 | 2 P01946,P02091                             |
| 3998 | 1,3,5,6,11, 2,4,7,8,9,1<br>13,14,16 0,12,15 | 1 Q9Z1F2                                    |
| 3999 | 1,3,5,6,11, 2,4,7,8,9,1<br>13,15,16 0,12,14 | 3 P01946,P02091,Q9Z1F2                      |
| 4000 | 1,3,5,6,11, 2,4,7,8,9,1<br>14,15,16 0,12,13 | 4 P01946,P02091,P02783,Q9Z1F2               |
| 4001 | 1,3,5,6,12, 2,4,7,8,9,1<br>13,14,15 0,11,16 | 3 P01946,P02091,P70549                      |
| 4002 | 1,3,5,6,12, 2,4,7,8,9,1<br>13,14,16 0,11,15 | 0                                           |
| 4003 | 1,3,5,6,12, 2,4,7,8,9,1<br>13,15,16 0,11,14 | 3 P01946,P02091,P07150                      |
| 4004 | 1,3,5,6,12, 2,4,7,8,9,1<br>14,15,16 0,11,13 | 3 P01946,P02091,P02783                      |

|      |                                             |                                                                  |
|------|---------------------------------------------|------------------------------------------------------------------|
| 4005 | 1,3,5,6,13, 2,4,7,8,9,1<br>14,15,16 0,11,12 | 3 P01946,P02091,Q62714                                           |
| 4006 | 1,3,5,7,8,9 2,4,6,12,1<br>,10,11 3,14,15,16 | 5 P01681,P06760,P35280,P49134,Q6P6R2                             |
| 4007 | 1,3,5,7,8,9 2,4,6,11,1<br>,10,12 3,14,15,16 | 0                                                                |
| 4008 | 1,3,5,7,8,9 2,4,6,11,1<br>,10,13 2,14,15,16 | 0                                                                |
| 4009 | 1,3,5,7,8,9 2,4,6,11,1<br>,10,14 2,13,15,16 | 3 P01681,P08937,Q63751                                           |
| 4010 | 1,3,5,7,8,9 2,4,6,11,1<br>,10,15 2,13,14,16 | 3 P01681,P35280,Q5RK11                                           |
| 4011 | 1,3,5,7,8,9 2,4,6,11,1<br>,10,16 2,13,14,15 | 0                                                                |
| 4012 | 1,3,5,7,8,9 2,4,6,10,1<br>,11,12 3,14,15,16 | 4 P01681,P06760,P35280,P47967                                    |
| 4013 | 1,3,5,7,8,9 2,4,6,10,1<br>,11,13 2,14,15,16 | 2 P06760,P35280                                                  |
| 4014 | 1,3,5,7,8,9 2,4,6,10,1<br>,11,14 2,13,15,16 | 7 P01681,P06760,P08649,P08937,P35280,Q63751,Q812E4               |
| 4015 | 1,3,5,7,8,9 2,4,6,10,1<br>,11,15 2,13,14,16 | 9 P01681,P06760,P08649,P35280,Q4FZU2,Q6IFW6,Q6IG02,Q6IMF3,Q6P6Q2 |
| 4016 | 1,3,5,7,8,9 2,4,6,10,1<br>,11,16 2,13,14,15 | 7 O88797,P06760,P08010,P08649,P35280,Q812E4,Q9JHB9               |
| 4017 | 1,3,5,7,8,9 2,4,6,10,1<br>,12,13 1,14,15,16 | 0                                                                |
| 4018 | 1,3,5,7,8,9 2,4,6,10,1<br>,12,14 1,13,15,16 | 2 P08937,Q63751                                                  |
| 4019 | 1,3,5,7,8,9 2,4,6,10,1<br>,12,15 1,13,14,16 | 3 P01681,P19132,P35280                                           |
| 4020 | 1,3,5,7,8,9 2,4,6,10,1<br>,12,16 1,13,14,15 | 0                                                                |
| 4021 | 1,3,5,7,8,9 2,4,6,10,1<br>,13,14 1,12,15,16 | 1 P08937                                                         |
| 4022 | 1,3,5,7,8,9 2,4,6,10,1<br>,13,15 1,12,14,16 | 2 P01681,P35280                                                  |
| 4023 | 1,3,5,7,8,9 2,4,6,10,1<br>,13,16 1,12,14,15 | 0                                                                |
| 4024 | 1,3,5,7,8,9 2,4,6,10,1<br>,14,15 1,12,13,16 | 3 P00714,P01681,P35280                                           |

|      |                        |                          |                                                                                                                                                                             |
|------|------------------------|--------------------------|-----------------------------------------------------------------------------------------------------------------------------------------------------------------------------|
| 4025 | 1,3,5,7,8,9<br>,14,16  | 2,4,6,10,1<br>1,12,13,15 | 0                                                                                                                                                                           |
| 4026 | 1,3,5,7,8,9<br>,15,16  | 2,4,6,10,1<br>1,12,13,14 | 2 P01681,P35280                                                                                                                                                             |
| 4027 | 1,3,5,7,8,1<br>0,11,12 | 2,4,6,9,13,<br>14,15,16  | 3 P47967,P97840,Q5I0D1                                                                                                                                                      |
| 4028 | 1,3,5,7,8,1<br>0,11,13 | 2,4,6,9,12,<br>14,15,16  | 2 P47967,P97840                                                                                                                                                             |
| 4029 | 1,3,5,7,8,1<br>0,11,14 | 2,4,6,9,12,<br>13,15,16  | 3 D3ZUC6,P08937,Q63751                                                                                                                                                      |
| 4030 | 1,3,5,7,8,1<br>0,11,15 | 2,4,6,9,12,<br>13,14,16  | 7 Q4FZU2,Q5RKI1,Q6IFU7,Q6IFW6,Q6IG02,Q6IMF3,Q6P6Q2                                                                                                                          |
| 4031 | 1,3,5,7,8,1<br>0,11,16 | 2,4,6,9,12,<br>13,14,15  | 5 O35077,P02782,P08010,P47967,Q9JHB9                                                                                                                                        |
| 4032 | 1,3,5,7,8,1<br>0,12,13 | 2,4,6,9,11,<br>14,15,16  | 2 P47967,P97840                                                                                                                                                             |
| 4033 | 1,3,5,7,8,1<br>0,12,14 | 2,4,6,9,11,<br>13,15,16  | 3 D3ZUC6,P08937,Q5RLM2                                                                                                                                                      |
| 4034 | 1,3,5,7,8,1<br>0,12,15 | 2,4,6,9,11,<br>13,14,16  | 2 D3ZUC6,Q5RKI1                                                                                                                                                             |
| 4035 | 1,3,5,7,8,1<br>0,12,16 | 2,4,6,9,11,<br>13,14,15  | 5 P0DMW0;P0DMW1,P46844,P47967,P97840,Q6AY41                                                                                                                                 |
| 4036 | 1,3,5,7,8,1<br>0,13,14 | 2,4,6,9,11,<br>12,15,16  | 4 D3ZUC6,P08937,Q62714,Q9WUW8                                                                                                                                               |
| 4037 | 1,3,5,7,8,1<br>0,13,15 | 2,4,6,9,11,<br>12,14,16  | 5 O35077,O70594,Q5RKI1,Q62714,Q64093                                                                                                                                        |
| 4038 | 1,3,5,7,8,1<br>0,13,16 | 2,4,6,9,11,<br>12,14,15  | 10 O35077,O70594,P19468,P46844,P57113,Q63424,Q64093,Q6AY41,Q8R431,Q9WUW8                                                                                                    |
| 4039 | 1,3,5,7,8,1<br>0,14,15 | 2,4,6,9,11,<br>12,13,16  | 7 D3ZUC6,O35077,P00714,P54921,Q05175,Q5RKI1,Q62714                                                                                                                          |
| 4040 | 1,3,5,7,8,1<br>0,14,16 | 2,4,6,9,11,<br>12,13,15  | 5 O35077,P57113,Q5RLM2,Q923S2,Q9WUW8                                                                                                                                        |
| 4041 | 1,3,5,7,8,1<br>0,15,16 | 2,4,6,9,11,<br>12,13,14  | O35077,O70377,O70594,P19468,P46844,P48508,P53790,P57113,P97608,Q05175,Q3ZAV1,Q5I0<br>23 E9,Q5RKI1,Q63270,Q63355,Q63424,Q64093,Q6AY41,Q6MG61,Q80W57,Q8R431,Q9WTW7,Q9<br>Z0W7 |
| 4042 | 1,3,5,7,8,1<br>1,12,13 | 2,4,6,9,10,<br>14,15,16  | 5 D3ZUC6,P47967,P97840,Q5I0D1,Q811M5                                                                                                                                        |
| 4043 | 1,3,5,7,8,1<br>1,12,14 | 2,4,6,9,10,<br>13,15,16  | 6 D3ZUC6,P08937,P11883,Q5I0D1,Q63751,Q811M5                                                                                                                                 |
| 4044 | 1,3,5,7,8,1<br>1,12,15 | 2,4,6,9,10,<br>13,14,16  | 10 D3ZUC6,P47967,P97840,Q4FZU2,Q6IFU7,Q6IFW6,Q6IG02,Q6IG05,Q6IMF3,Q6P6Q2                                                                                                    |

|      |                        |                         |    |                                                                                     |
|------|------------------------|-------------------------|----|-------------------------------------------------------------------------------------|
| 4045 | 1,3,5,7,8,1<br>1,12,16 | 2,4,6,9,10,<br>13,14,15 | 8  | P02782,P08010,P30120,P47967,P97840,Q6IG05,Q811M5,Q9JHB9                             |
| 4046 | 1,3,5,7,8,1<br>1,13,14 | 2,4,6,9,10,<br>12,15,16 | 4  | D3ZUC6,P08649,P08937,Q811M5                                                         |
| 4047 | 1,3,5,7,8,1<br>1,13,15 | 2,4,6,9,10,<br>12,14,16 | 9  | D3ZUC6,P01041,P47967,Q4FZU2,Q6IFU7,Q6IFW6,Q6IG02,Q6IMF3,Q6P6Q2                      |
| 4048 | 1,3,5,7,8,1<br>1,13,16 | 2,4,6,9,10,<br>12,14,15 | 8  | P02782,P08010,P08649,P09456,P30120,P47967,Q811M5,Q9JHB9                             |
| 4049 | 1,3,5,7,8,1<br>1,14,15 | 2,4,6,9,10,<br>12,13,16 | 10 | D3ZUC6,P08649,Q4FZU2,Q6IFU7,Q6IFU8,Q6IFW6,Q6IG02,Q6IG05,Q6IMF3,Q6P6Q2               |
| 4050 | 1,3,5,7,8,1<br>1,14,16 | 2,4,6,9,10,<br>12,13,15 | 5  | P02782,P08010,P08649,Q811M5,Q9JHB9                                                  |
| 4051 | 1,3,5,7,8,1<br>1,15,16 | 2,4,6,9,10,<br>12,13,14 | 12 | P01041,P02782,P08010,P08649,Q4FZU2,Q6IFU7,Q6IFU8,Q6IFW6,Q6IG02,Q6IG05,Q6IMF3,Q6P6Q2 |
| 4052 | 1,3,5,7,8,1<br>2,13,14 | 2,4,6,9,10,<br>11,15,16 | 2  | D3ZUC6,Q811M5                                                                       |
| 4053 | 1,3,5,7,8,1<br>2,13,15 | 2,4,6,9,10,<br>11,14,16 | 3  | D3ZUC6,P47967,P97840                                                                |
| 4054 | 1,3,5,7,8,1<br>2,13,16 | 2,4,6,9,10,<br>11,14,15 | 3  | P47967,P97840,Q811M5                                                                |
| 4055 | 1,3,5,7,8,1<br>2,14,15 | 2,4,6,9,10,<br>11,13,16 | 2  | D3ZUC6,P00714                                                                       |
| 4056 | 1,3,5,7,8,1<br>2,14,16 | 2,4,6,9,10,<br>11,13,15 | 2  | Q5RLM2,Q811M5                                                                       |
| 4057 | 1,3,5,7,8,1<br>2,15,16 | 2,4,6,9,10,<br>11,13,14 | 1  | Q6IG05                                                                              |
| 4058 | 1,3,5,7,8,1<br>3,14,15 | 2,4,6,9,10,<br>11,12,16 | 2  | D3ZUC6,Q62714                                                                       |
| 4059 | 1,3,5,7,8,1<br>3,14,16 | 2,4,6,9,10,<br>11,12,15 | 6  | O35077,O55145,Q62714,Q811M5,Q99MH3,Q9WUW8                                           |
| 4060 | 1,3,5,7,8,1<br>3,15,16 | 2,4,6,9,10,<br>11,12,14 | 2  | O35077,Q62714                                                                       |
| 4061 | 1,3,5,7,8,1<br>4,15,16 | 2,4,6,9,10,<br>11,12,13 | 3  | O35077,O55145,Q62714                                                                |
| 4062 | 1,3,5,7,9,1<br>0,11,12 | 2,4,6,8,13,<br>14,15,16 | 2  | P47967,Q03191                                                                       |
| 4063 | 1,3,5,7,9,1<br>0,11,13 | 2,4,6,8,12,<br>14,15,16 | 0  |                                                                                     |
| 4064 | 1,3,5,7,9,1<br>0,11,14 | 2,4,6,8,12,<br>13,15,16 | 0  |                                                                                     |

|      |                        |                         |                                                                  |
|------|------------------------|-------------------------|------------------------------------------------------------------|
| 4065 | 1,3,5,7,9,1<br>0,11,15 | 2,4,6,8,12,<br>13,14,16 | 1 Q5RKI1                                                         |
| 4066 | 1,3,5,7,9,1<br>0,11,16 | 2,4,6,8,12,<br>13,14,15 | 0                                                                |
| 4067 | 1,3,5,7,9,1<br>0,12,13 | 2,4,6,8,11,<br>14,15,16 | 3 P47967,P50280,Q6AY61                                           |
| 4068 | 1,3,5,7,9,1<br>0,12,14 | 2,4,6,8,11,<br>13,15,16 | 3 P30120,P50280,Q6AY61                                           |
| 4069 | 1,3,5,7,9,1<br>0,12,15 | 2,4,6,8,11,<br>13,14,16 | 5 O54728,P30120,Q5RKI1,Q6AY61,Q99041                             |
| 4070 | 1,3,5,7,9,1<br>0,12,16 | 2,4,6,8,11,<br>13,14,15 | 0                                                                |
| 4071 | 1,3,5,7,9,1<br>0,13,14 | 2,4,6,8,11,<br>12,15,16 | 1 P50280                                                         |
| 4072 | 1,3,5,7,9,1<br>0,13,15 | 2,4,6,8,11,<br>12,14,16 | 3 P12020,Q00715,Q5RKI1                                           |
| 4073 | 1,3,5,7,9,1<br>0,13,16 | 2,4,6,8,11,<br>12,14,15 | 1 P12020                                                         |
| 4074 | 1,3,5,7,9,1<br>0,14,15 | 2,4,6,8,11,<br>12,13,16 | 4 P00714,P12020,P30120,Q5RKI1                                    |
| 4075 | 1,3,5,7,9,1<br>0,14,16 | 2,4,6,8,11,<br>12,13,15 | 0                                                                |
| 4076 | 1,3,5,7,9,1<br>0,15,16 | 2,4,6,8,11,<br>12,13,14 | 2 P12020,Q5RKI1                                                  |
| 4077 | 1,3,5,7,9,1<br>1,12,13 | 2,4,6,8,10,<br>14,15,16 | 7 P20762,P47967,P54921,P97840,Q03191,Q5I0D1,Q62761;Q62762;Q62763 |
| 4078 | 1,3,5,7,9,1<br>1,12,14 | 2,4,6,8,10,<br>13,15,16 | 3 O55004,P07151,Q03191                                           |
| 4079 | 1,3,5,7,9,1<br>1,12,15 | 2,4,6,8,10,<br>13,14,16 | 4 O55004,P02631,P07151,Q62761;Q62762;Q62763                      |
| 4080 | 1,3,5,7,9,1<br>1,12,16 | 2,4,6,8,10,<br>13,14,15 | 1 Q03191                                                         |
| 4081 | 1,3,5,7,9,1<br>1,13,14 | 2,4,6,8,10,<br>12,15,16 | 1 P0DMW0;P0DMW1                                                  |
| 4082 | 1,3,5,7,9,1<br>1,13,15 | 2,4,6,8,10,<br>12,14,16 | 0                                                                |
| 4083 | 1,3,5,7,9,1<br>1,13,16 | 2,4,6,8,10,<br>12,14,15 | 1 P54921                                                         |
| 4084 | 1,3,5,7,9,1<br>1,14,15 | 2,4,6,8,10,<br>12,13,16 | 3 O55004,P02631,P0DMW0;P0DMW1                                    |

|      |                         |                         |                                      |
|------|-------------------------|-------------------------|--------------------------------------|
| 4085 | 1,3,5,7,9,1<br>1,14,16  | 2,4,6,8,10,<br>12,13,15 | 1 P02631                             |
| 4086 | 1,3,5,7,9,1<br>1,15,16  | 2,4,6,8,10,<br>12,13,14 | 1 P02631                             |
| 4087 | 1,3,5,7,9,1<br>2,13,14  | 2,4,6,8,10,<br>11,15,16 | 2 P50280,Q6AY61                      |
| 4088 | 1,3,5,7,9,1<br>2,13,15  | 2,4,6,8,10,<br>11,14,16 | 1 Q6AY61                             |
| 4089 | 1,3,5,7,9,1<br>2,13,16  | 2,4,6,8,10,<br>11,14,15 | 0                                    |
| 4090 | 1,3,5,7,9,1<br>2,14,15  | 2,4,6,8,10,<br>11,13,16 | 5 O55004,P00714,P02631,P30120,Q6AY61 |
| 4091 | 1,3,5,7,9,1<br>2,14,16  | 2,4,6,8,10,<br>11,13,15 | 1 Q68G31                             |
| 4092 | 1,3,5,7,9,1<br>2,15,16  | 2,4,6,8,10,<br>11,13,14 | 2 Q68G31,Q6AY61                      |
| 4093 | 1,3,5,7,9,1<br>3,14,15  | 2,4,6,8,10,<br>11,12,16 | 1 Q00715                             |
| 4094 | 1,3,5,7,9,1<br>3,14,16  | 2,4,6,8,10,<br>11,12,15 | 0                                    |
| 4095 | 1,3,5,7,9,1<br>3,15,16  | 2,4,6,8,10,<br>11,12,14 | 1 P12020                             |
| 4096 | 1,3,5,7,9,1<br>4,15,16  | 2,4,6,8,10,<br>11,12,13 | 1 P02631                             |
| 4097 | 1,3,5,7,10,<br>11,12,13 | 2,4,6,8,9,1<br>4,15,16  | 4 P23593,P47967,P97840,Q5I0D1        |
| 4098 | 1,3,5,7,10,<br>11,12,14 | 2,4,6,8,9,1<br>3,15,16  | 2 P23593,P47967                      |
| 4099 | 1,3,5,7,10,<br>11,12,15 | 2,4,6,8,9,1<br>3,14,16  | 4 P23593,P47967,P97840,Q5RKI1        |
| 4100 | 1,3,5,7,10,<br>11,12,16 | 2,4,6,8,9,1<br>3,14,15  | 2 P47967,P97840                      |
| 4101 | 1,3,5,7,10,<br>11,13,14 | 2,4,6,8,9,1<br>2,15,16  | 0                                    |
| 4102 | 1,3,5,7,10,<br>11,13,15 | 2,4,6,8,9,1<br>2,14,16  | 3 P47967,P97840,Q5RKI1               |
| 4103 | 1,3,5,7,10,<br>11,13,16 | 2,4,6,8,9,1<br>2,14,15  | 2 P47967,P97840                      |
| 4104 | 1,3,5,7,10,<br>11,14,15 | 2,4,6,8,9,1<br>2,13,16  | 1 Q5RKI1                             |



|      |                                             |                                      |
|------|---------------------------------------------|--------------------------------------|
| 4105 | 1,3,5,7,10, 2,4,6,8,9,1<br>11,14,16 2,13,15 | 0                                    |
| 4106 | 1,3,5,7,10, 2,4,6,8,9,1<br>11,15,16 2,13,14 | 2 Q5RKI1,Q6IFW6                      |
| 4107 | 1,3,5,7,10, 2,4,6,8,9,1<br>12,13,14 1,15,16 | 5 D3ZUC6,P47967,P50280,Q6AY61,Q6P6S4 |
| 4108 | 1,3,5,7,10, 2,4,6,8,9,1<br>12,13,15 1,14,16 | 4 P47967,P97840,Q5RKI1,Q6AY61        |
| 4109 | 1,3,5,7,10, 2,4,6,8,9,1<br>12,13,16 1,14,15 | 3 P47967,P97840,Q6AY61               |
| 4110 | 1,3,5,7,10, 2,4,6,8,9,1<br>12,14,15 1,13,16 | 5 D3ZUC6,P00714,P30120,Q5RKI1,Q6AY61 |
| 4111 | 1,3,5,7,10, 2,4,6,8,9,1<br>12,14,16 1,13,15 | 1 Q6AY61                             |
| 4112 | 1,3,5,7,10, 2,4,6,8,9,1<br>12,15,16 1,13,14 | 3 P97840,Q5RKI1,Q6AY61               |
| 4113 | 1,3,5,7,10, 2,4,6,8,9,1<br>13,14,15 1,12,16 | 2 D3ZUC6,Q5RKI1                      |
| 4114 | 1,3,5,7,10, 2,4,6,8,9,1<br>13,14,16 1,12,15 | 3 O35077,Q6P6S4,Q9WUW8               |
| 4115 | 1,3,5,7,10, 2,4,6,8,9,1<br>13,15,16 1,12,14 | 3 O35077,P12020,Q5RKI1               |
| 4116 | 1,3,5,7,10, 2,4,6,8,9,1<br>14,15,16 1,12,13 | 2 O35077,Q5RKI1                      |
| 4117 | 1,3,5,7,11, 2,4,6,8,9,1<br>12,13,14 0,15,16 | 4 D3ZUC6,P47967,Q5I0D1,Q811M5        |
| 4118 | 1,3,5,7,11, 2,4,6,8,9,1<br>12,13,15 0,14,16 | 4 P17559,P47967,P97840,Q5I0D1        |
| 4119 | 1,3,5,7,11, 2,4,6,8,9,1<br>12,13,16 0,14,15 | 4 P17559,P47967,P97840,Q811M5        |
| 4120 | 1,3,5,7,11, 2,4,6,8,9,1<br>12,14,15 0,13,16 | 4 D3ZUC6,O55004,P02631,P17559        |
| 4121 | 1,3,5,7,11, 2,4,6,8,9,1<br>12,14,16 0,13,15 | 2 P17559,Q811M5                      |
| 4122 | 1,3,5,7,11, 2,4,6,8,9,1<br>12,15,16 0,13,14 | 3 P17559,P97840,Q6IFW6               |
| 4123 | 1,3,5,7,11, 2,4,6,8,9,1<br>13,14,15 0,12,16 | 2 D3ZUC6,P17559                      |
| 4124 | 1,3,5,7,11, 2,4,6,8,9,1<br>13,14,16 0,12,15 | 2 P17559,Q811M5                      |

|      |                                             |                                             |
|------|---------------------------------------------|---------------------------------------------|
| 4125 | 1,3,5,7,11, 2,4,6,8,9,1<br>13,15,16 0,12,14 | 2 P17559,Q6IFW6                             |
| 4126 | 1,3,5,7,11, 2,4,6,8,9,1<br>14,15,16 0,12,13 | 3 P02631,P17559,Q6IFW6                      |
| 4127 | 1,3,5,7,12, 2,4,6,8,9,1<br>13,14,15 0,11,16 | 2 D3ZUC6,Q6AY61                             |
| 4128 | 1,3,5,7,12, 2,4,6,8,9,1<br>13,14,16 0,11,15 | 3 Q6AY61,Q6P6S4,Q811M5                      |
| 4129 | 1,3,5,7,12, 2,4,6,8,9,1<br>13,15,16 0,11,14 | 2 P97840,Q6AY61                             |
| 4130 | 1,3,5,7,12, 2,4,6,8,9,1<br>14,15,16 0,11,13 | 2 P17559,Q6AY61                             |
| 4131 | 1,3,5,7,13, 2,4,6,8,9,1<br>14,15,16 0,11,12 | 2 P17559,Q62714                             |
| 4132 | 1,3,5,8,9,1 2,4,6,7,13,<br>0,11,12 14,15,16 | 2 O88797,P01835                             |
| 4133 | 1,3,5,8,9,1 2,4,6,7,12,<br>0,11,13 14,15,16 | 1 Q80WL1                                    |
| 4134 | 1,3,5,8,9,1 2,4,6,7,12,<br>0,11,14 13,15,16 | 0                                           |
| 4135 | 1,3,5,8,9,1 2,4,6,7,12,<br>0,11,15 13,14,16 | 6 P01681,Q4FZU2,Q6IFU7,Q6IFW6,Q6IMF3,Q6P6Q2 |
| 4136 | 1,3,5,8,9,1 2,4,6,7,12,<br>0,11,16 13,14,15 | 2 O88797,P01835                             |
| 4137 | 1,3,5,8,9,1 2,4,6,7,11,<br>0,12,13 14,15,16 | 3 P11598,Q80WL1,Q8CJ52                      |
| 4138 | 1,3,5,8,9,1 2,4,6,7,11,<br>0,12,14 13,15,16 | 2 P00714,P11598                             |
| 4139 | 1,3,5,8,9,1 2,4,6,7,11,<br>0,12,15 13,14,16 | 6 P00714,P01681,P11598,P34901,P36376,Q99041 |
| 4140 | 1,3,5,8,9,1 2,4,6,7,11,<br>0,12,16 13,14,15 | 0                                           |
| 4141 | 1,3,5,8,9,1 2,4,6,7,11,<br>0,13,14 12,15,16 | 1 P11598                                    |
| 4142 | 1,3,5,8,9,1 2,4,6,7,11,<br>0,13,15 12,14,16 | 5 P01681,P11598,P62804,Q00715,Q80WL1        |
| 4143 | 1,3,5,8,9,1 2,4,6,7,11,<br>0,13,16 12,14,15 | 1 Q80WL1                                    |
| 4144 | 1,3,5,8,9,1 2,4,6,7,11,<br>0,14,15 12,13,16 | 5 P00714,P01681,P05369,P07647,P11598        |

|      |                        |                         |                                                                                        |
|------|------------------------|-------------------------|----------------------------------------------------------------------------------------|
| 4145 | 1,3,5,8,9,1<br>0,14,16 | 2,4,6,7,11,<br>12,13,15 | 0                                                                                      |
| 4146 | 1,3,5,8,9,1<br>0,15,16 | 2,4,6,7,11,<br>12,13,14 | 2 P01681,P11598                                                                        |
| 4147 | 1,3,5,8,9,1<br>1,12,13 | 2,4,6,7,10,<br>14,15,16 | 3 O88797,P09527,Q80WL1                                                                 |
| 4148 | 1,3,5,8,9,1<br>1,12,14 | 2,4,6,7,10,<br>13,15,16 | 2 O88797,P09527                                                                        |
| 4149 | 1,3,5,8,9,1<br>1,12,15 | 2,4,6,7,10,<br>13,14,16 | 12 O88797,P01681,P09527,P36376,Q4FZU2,Q6IFU7,Q6IFW6,Q6IG02,Q6IG05,Q6IMF3,Q6P6Q2,Q80WL1 |
| 4150 | 1,3,5,8,9,1<br>1,12,16 | 2,4,6,7,10,<br>13,14,15 | 2 O88797,Q80WL1                                                                        |
| 4151 | 1,3,5,8,9,1<br>1,13,14 | 2,4,6,7,10,<br>12,15,16 | 2 P0DMW0;P0DMW1,Q80WL1                                                                 |
| 4152 | 1,3,5,8,9,1<br>1,13,15 | 2,4,6,7,10,<br>12,14,16 | 8 P01681,Q4FZU2,Q6IFU7,Q6IFW6,Q6IG02,Q6IMF3,Q6P6Q2,Q80WL1                              |
| 4153 | 1,3,5,8,9,1<br>1,13,16 | 2,4,6,7,10,<br>12,14,15 | 2 O88797,Q80WL1                                                                        |
| 4154 | 1,3,5,8,9,1<br>1,14,15 | 2,4,6,7,10,<br>12,13,16 | 9 P00714,P01681,P80299,Q4FZU2,Q6IFU7,Q6IFW6,Q6IG02,Q6IMF3,Q6P6Q2                       |
| 4155 | 1,3,5,8,9,1<br>1,14,16 | 2,4,6,7,10,<br>12,13,15 | 2 O88797,P80299                                                                        |
| 4156 | 1,3,5,8,9,1<br>1,15,16 | 2,4,6,7,10,<br>12,13,14 | 10 O88797,P01681,P80299,Q4FZU2,Q6IFU7,Q6IFW6,Q6IG02,Q6IMF3,Q6P6Q2,Q80WL1               |
| 4157 | 1,3,5,8,9,1<br>2,13,14 | 2,4,6,7,10,<br>11,15,16 | 2 P11598,P17988                                                                        |
| 4158 | 1,3,5,8,9,1<br>2,13,15 | 2,4,6,7,10,<br>11,14,16 | 4 P11598,P36376,Q80WL1,Q99041                                                          |
| 4159 | 1,3,5,8,9,1<br>2,13,16 | 2,4,6,7,10,<br>11,14,15 | 1 Q80WL1                                                                               |
| 4160 | 1,3,5,8,9,1<br>2,14,15 | 2,4,6,7,10,<br>11,13,16 | 4 P00714,P01681,P11598,P36376                                                          |
| 4161 | 1,3,5,8,9,1<br>2,14,16 | 2,4,6,7,10,<br>11,13,15 | 0                                                                                      |
| 4162 | 1,3,5,8,9,1<br>2,15,16 | 2,4,6,7,10,<br>11,13,14 | 4 P01681,P11598,Q80WL1,Q99041                                                          |
| 4163 | 1,3,5,8,9,1<br>3,14,15 | 2,4,6,7,10,<br>11,12,16 | 6 P00714,P01681,P11598,Q00715,Q5M872,Q80WL1                                            |
| 4164 | 1,3,5,8,9,1<br>3,14,16 | 2,4,6,7,10,<br>11,12,15 | 1 Q80WL1                                                                               |

|      |                         |                         |                                                           |
|------|-------------------------|-------------------------|-----------------------------------------------------------|
| 4165 | 1,3,5,8,9,1<br>3,15,16  | 2,4,6,7,10,<br>11,12,14 | 1 Q80WL1                                                  |
| 4166 | 1,3,5,8,9,1<br>4,15,16  | 2,4,6,7,10,<br>11,12,13 | 4 P00714,P01681,P11598,P80299                             |
| 4167 | 1,3,5,8,10,<br>11,12,13 | 2,4,6,7,9,1<br>4,15,16  | 3 P47967,Q5I0D1,Q80WL1                                    |
| 4168 | 1,3,5,8,10,<br>11,12,14 | 2,4,6,7,9,1<br>3,15,16  | 1 D3ZUC6                                                  |
| 4169 | 1,3,5,8,10,<br>11,12,15 | 2,4,6,7,9,1<br>3,14,16  | 8 Q4FZU2,Q6IFU7,Q6IFW6,Q6IG02,Q6IG05,Q6IMF3,Q6P6Q2,Q9R168 |
| 4170 | 1,3,5,8,10,<br>11,12,16 | 2,4,6,7,9,1<br>3,14,15  | 1 O88797                                                  |
| 4171 | 1,3,5,8,10,<br>11,13,14 | 2,4,6,7,9,1<br>2,15,16  | 1 Q6IFU7                                                  |
| 4172 | 1,3,5,8,10,<br>11,13,15 | 2,4,6,7,9,1<br>2,14,16  | 7 Q4FZU2,Q6IFU7,Q6IFW6,Q6IG02,Q6IMF3,Q6P6Q2,Q80WL1        |
| 4173 | 1,3,5,8,10,<br>11,13,16 | 2,4,6,7,9,1<br>2,14,15  | 2 Q6IFU7,Q80WL1                                           |
| 4174 | 1,3,5,8,10,<br>11,14,15 | 2,4,6,7,9,1<br>2,13,16  | 7 D3ZUC6,Q4FZU2,Q6IFU7,Q6IFW6,Q6IG02,Q6IMF3,Q6P6Q2        |
| 4175 | 1,3,5,8,10,<br>11,14,16 | 2,4,6,7,9,1<br>2,13,15  | 1 Q6IFU7                                                  |
| 4176 | 1,3,5,8,10,<br>11,15,16 | 2,4,6,7,9,1<br>2,13,14  | 6 Q4FZU2,Q6IFU7,Q6IFW6,Q6IG02,Q6IMF3,Q6P6Q2               |
| 4177 | 1,3,5,8,10,<br>12,13,14 | 2,4,6,7,9,1<br>1,15,16  | 2 D3ZUC6,Q8CJ52                                           |
| 4178 | 1,3,5,8,10,<br>12,13,15 | 2,4,6,7,9,1<br>1,14,16  | 3 P11598,Q80WL1,Q9R168                                    |
| 4179 | 1,3,5,8,10,<br>12,13,16 | 2,4,6,7,9,1<br>1,14,15  | 1 Q80WL1                                                  |
| 4180 | 1,3,5,8,10,<br>12,14,15 | 2,4,6,7,9,1<br>1,13,16  | 6 D3ZUC6,P00714,P11598,Q63617,Q9R168,Q9Z0J6               |
| 4181 | 1,3,5,8,10,<br>12,14,16 | 2,4,6,7,9,1<br>1,13,15  | 0                                                         |
| 4182 | 1,3,5,8,10,<br>12,15,16 | 2,4,6,7,9,1<br>1,13,14  | 2 P0DMW0;P0DMW1,Q9R168                                    |
| 4183 | 1,3,5,8,10,<br>13,14,15 | 2,4,6,7,9,1<br>1,12,16  | 3 D3ZUC6,P00714,P63322                                    |
| 4184 | 1,3,5,8,10,<br>13,14,16 | 2,4,6,7,9,1<br>1,12,15  | 1 O35077                                                  |

|      |                                             |                                                                                 |
|------|---------------------------------------------|---------------------------------------------------------------------------------|
| 4185 | 1,3,5,8,10, 2,4,6,7,9,1<br>13,15,16 1,12,14 | 2 O35077,Q80WL1                                                                 |
| 4186 | 1,3,5,8,10, 2,4,6,7,9,1<br>14,15,16 1,12,13 | 2 O35077,Q63617                                                                 |
| 4187 | 1,3,5,8,11, 2,4,6,7,9,1<br>12,13,14 0,15,16 | 3 D3ZUC6,Q811M5,Q9WVH8                                                          |
| 4188 | 1,3,5,8,11, 2,4,6,7,9,1<br>12,13,15 0,14,16 | 10 Q4FZU2,Q6IFU7,Q6IFW6,Q6IG02,Q6IG05,Q6IMF3,Q6P6Q2,Q80WL1,Q9R168,Q9WVH8        |
| 4189 | 1,3,5,8,11, 2,4,6,7,9,1<br>12,13,16 0,14,15 | 3 P47967,Q80WL1,Q811M5                                                          |
| 4190 | 1,3,5,8,11, 2,4,6,7,9,1<br>12,14,15 0,13,16 | 10 D3ZUC6,P80299,Q4FZU2,Q6IFU7,Q6IFW6,Q6IG02,Q6IG05,Q6IMF3,Q6P6Q2,Q9WVH8        |
| 4191 | 1,3,5,8,11, 2,4,6,7,9,1<br>12,14,16 0,13,15 | 4 O88797,P80299,Q811M5,Q9WVH8                                                   |
| 4192 | 1,3,5,8,11, 2,4,6,7,9,1<br>12,15,16 0,13,14 | 11 O88797,P80299,Q4FZU2,Q6IFU7,Q6IFW6,Q6IG02,Q6IG05,Q6IMF3,Q6P6Q2,Q80WL1,Q9WVH8 |
| 4193 | 1,3,5,8,11, 2,4,6,7,9,1<br>13,14,15 0,12,16 | 8 D3ZUC6,Q4FZU2,Q6IFU7,Q6IFW6,Q6IG02,Q6IMF3,Q6P6Q2,Q80WL1                       |
| 4194 | 1,3,5,8,11, 2,4,6,7,9,1<br>13,14,16 0,12,15 | 3 Q6IFU7,Q80WL1,Q811M5                                                          |
| 4195 | 1,3,5,8,11, 2,4,6,7,9,1<br>13,15,16 0,12,14 | 7 Q4FZU2,Q6IFU7,Q6IFW6,Q6IG02,Q6IMF3,Q6P6Q2,Q80WL1                              |
| 4196 | 1,3,5,8,11, 2,4,6,7,9,1<br>14,15,16 0,12,13 | 7 P80299,Q4FZU2,Q6IFU7,Q6IFW6,Q6IG02,Q6IMF3,Q6P6Q2                              |
| 4197 | 1,3,5,8,12, 2,4,6,7,9,1<br>13,14,15 0,11,16 | 4 D3ZUC6,P00714,P11598,Q9R168                                                   |
| 4198 | 1,3,5,8,12, 2,4,6,7,9,1<br>13,14,16 0,11,15 | 1 Q811M5                                                                        |
| 4199 | 1,3,5,8,12, 2,4,6,7,9,1<br>13,15,16 0,11,14 | 2 Q80WL1,Q9R168                                                                 |
| 4200 | 1,3,5,8,12, 2,4,6,7,9,1<br>14,15,16 0,11,13 | 1 P80299                                                                        |
| 4201 | 1,3,5,8,13, 2,4,6,7,9,1<br>14,15,16 0,11,12 | 3 O35077,Q62714,Q80WL1                                                          |
| 4202 | 1,3,5,9,10, 2,4,6,7,8,1<br>11,12,13 4,15,16 | 8 P20761,P20762,P50280,P98089,Q03191,Q62635,Q62761;Q62762;Q62763,Q6TMA8         |
| 4203 | 1,3,5,9,10, 2,4,6,7,8,1<br>11,12,14 3,15,16 | 5 O55004,P02631,P07151,P98089,Q6TMA8                                            |
| 4204 | 1,3,5,9,10, 2,4,6,7,8,1<br>11,12,15 3,14,16 | 8 D4A5U3,O55004,P02631,P20761,P98089,Q62635,Q62761;Q62762;Q62763,Q6TMA8         |

|      |                                             |    |                                                                                                                                                                                                                                               |
|------|---------------------------------------------|----|-----------------------------------------------------------------------------------------------------------------------------------------------------------------------------------------------------------------------------------------------|
| 4205 | 1,3,5,9,10, 2,4,6,7,8,1<br>11,12,16 3,14,15 | 4  | P98089,Q03191,Q62635,Q8CIZ5                                                                                                                                                                                                                   |
| 4206 | 1,3,5,9,10, 2,4,6,7,8,1<br>11,13,14 2,15,16 | 4  | O55004,P20762,P50280,P98089                                                                                                                                                                                                                   |
| 4207 | 1,3,5,9,10, 2,4,6,7,8,1<br>11,13,15 2,14,16 | 5  | P02631,P12020,P20762,P98089,Q62635                                                                                                                                                                                                            |
| 4208 | 1,3,5,9,10, 2,4,6,7,8,1<br>11,13,16 2,14,15 | 2  | P98089,Q62635                                                                                                                                                                                                                                 |
| 4209 | 1,3,5,9,10, 2,4,6,7,8,1<br>11,14,15 2,13,16 | 4  | O55004,P00714,P02631,P98089                                                                                                                                                                                                                   |
| 4210 | 1,3,5,9,10, 2,4,6,7,8,1<br>11,14,16 2,13,15 | 3  | P02631,P98089,Q8CIZ5                                                                                                                                                                                                                          |
| 4211 | 1,3,5,9,10, 2,4,6,7,8,1<br>11,15,16 2,13,14 | 5  | P02631,P98089,Q62635,Q8CIZ5,Q9Z2L0                                                                                                                                                                                                            |
| 4212 | 1,3,5,9,10, 2,4,6,7,8,1<br>12,13,14 1,15,16 | 25 | P02780,P02781,P02782,P06761,P07150,P07647,P08723,P09456,P0C0A9,P11598,P12020,P20762,P22273,P22282,P22283,P30120,P36374,P46462,P50280,P98089,Q4G075,Q5M8C6,Q63617,Q8CJ52,Q99041                                                                |
| 4213 | 1,3,5,9,10, 2,4,6,7,8,1<br>12,13,15 1,14,16 | 26 | P02780,P02781,P02782,P06761,P07150,P07647,P08723,P09456,P0C0A9,P11598,P12020,P20762,P22273,P22282,P22283,P30120,P46462,P50280,P98089,Q00715,Q4G075,Q5GRG2,Q5M8C6,Q62635,Q63617,Q99041                                                         |
| 4214 | 1,3,5,9,10, 2,4,6,7,8,1<br>12,13,16 1,14,15 | 16 | P06761,P07150,P0C0A9,P11598,P12020,P22273,P22282,P46462,P50280,P98089,Q4G075,Q5GRG2,Q62635,Q63617,Q8CJ52,Q99041                                                                                                                               |
| 4215 | 1,3,5,9,10, 2,4,6,7,8,1<br>12,14,15 1,13,16 | 31 | D4A5U3,O55004,P00714,P02631,P02780,P02781,P02782,P05369,P06761,P07647,P08723,P09456,P0C0A9,P11598,P12020,P22273,P22282,P22283,P24368,P30120,P36374,P46462,P50280,P98089,Q00715,Q4G075,Q5M8C6,Q62902,Q63617,Q99041,Q9R0T3                      |
| 4216 | 1,3,5,9,10, 2,4,6,7,8,1<br>12,14,16 1,13,15 | 13 | P02780,P06761,P11598,P22273,P22282,P46462,P50280,P55091,P98089,Q4G075,Q63617,Q8CIZ5,Q99041                                                                                                                                                    |
| 4217 | 1,3,5,9,10, 2,4,6,7,8,1<br>12,15,16 1,13,14 | 20 | D4A5U3,P02631,P02780,P06761,P07150,P0C0A9,P11598,P12020,P22273,P22282,P46462,P50280,P55091,P98089,Q4G075,Q5GRG2,Q62635,Q63617,Q8CIZ5,Q99041                                                                                                   |
| 4218 | 1,3,5,9,10, 2,4,6,7,8,1<br>13,14,15 1,12,16 | 34 | P00714,P02631,P02780,P02781,P02782,P04905,P06761,P06911,P07150,P07647,P08723,P09456,P0C0A9,P11598,P12020,P22273,P22282,P22283,P30120,P36374,P46462,P50280,P62804,P97523,P98089,Q00715,Q4G075,Q5GRG2,Q5M8C6,Q63617,Q8CFN2,Q99041,Q9JHB9,Q9R0T3 |
| 4219 | 1,3,5,9,10, 2,4,6,7,8,1<br>13,14,16 1,12,15 | 12 | P02780,P06761,P07150,P11598,P12020,P22273,P22282,P46462,P50280,P98089,Q5GRG2,Q63617                                                                                                                                                           |
| 4220 | 1,3,5,9,10, 2,4,6,7,8,1<br>13,15,16 1,12,14 | 18 | P02780,P06761,P06911,P07150,P11598,P12020,P22273,P22282,P46462,P50280,P98089,Q00715,Q4G075,Q5GRG2,Q5M8C6,Q62635,Q63617,Q99041                                                                                                                 |
| 4221 | 1,3,5,9,10, 2,4,6,7,8,1<br>14,15,16 1,12,13 | 23 | P00714,P02631,P02780,P06761,P06911,P11598,P12020,P22273,P22282,P22283,P46462,P50280,P55091,P98089,Q4G075,Q5GRG2,Q5M8C6,Q62635,Q63617,Q8CIZ5,Q99041,Q9JI85,Q9R0T3                                                                              |
| 4222 | 1,3,5,9,11, 2,4,6,7,8,1<br>12,13,14 0,15,16 | 28 | O55004,O70257,O70594,P02631,P07151,P17988,P19468,P20761,P20762,P50280,P51907,P53790,P98089,Q03248,Q05175,Q3ZAV1,Q4QQT4,Q5I0E9,Q5M7T9,Q62761,Q62762,Q62763,Q63270,Q63424,Q63598,Q63618,Q6Q0N1,Q9R1T5,Q9WTW7,Q9Z0W7                             |

|      |                                             |    |                                                                                                                                                                                                                                 |
|------|---------------------------------------------|----|---------------------------------------------------------------------------------------------------------------------------------------------------------------------------------------------------------------------------------|
| 4223 | 1,3,5,9,11, 2,4,6,7,8,1<br>12,13,15 0,14,16 | 11 | O55004,P02631,P06399,P07151,P20761,P20762,P57113,P98089,Q62635,Q62761;Q62762;Q62763,Q80WL1                                                                                                                                      |
| 4224 | 1,3,5,9,11, 2,4,6,7,8,1<br>12,13,16 0,14,15 | 9  | O55004,P02631,P20762,P54921,P98089,Q03191,Q62635,Q80WL1,Q9Z1F2                                                                                                                                                                  |
| 4225 | 1,3,5,9,11, 2,4,6,7,8,1<br>12,14,15 0,13,16 | 16 | O55004,O70257,P00714,P02631,P07151,P20762,P28570,P46844,P51907,P55091,P98089,Q3ZAV1,Q5M7T9,Q62761;Q62762;Q62763,Q63424,Q63618                                                                                                   |
| 4226 | 1,3,5,9,11, 2,4,6,7,8,1<br>12,14,16 0,13,15 | 11 | O55004,O70257,P02631,P20762,P51907,P55091,P98089,Q63598,Q63618,Q8CIZ5,Q9Z1F2                                                                                                                                                    |
| 4227 | 1,3,5,9,11, 2,4,6,7,8,1<br>12,15,16 0,13,14 | 10 | O55004,P02631,P07171,P20762,P25809,P55091,P98089,Q62635,Q8CIZ5,Q9Z1F2                                                                                                                                                           |
| 4228 | 1,3,5,9,11, 2,4,6,7,8,1<br>13,14,15 0,12,16 | 8  | O55004,P02631,P07151,P0DMW0;P0DMW1,P20762,P55091,P98089,Q63598                                                                                                                                                                  |
| 4229 | 1,3,5,9,11, 2,4,6,7,8,1<br>13,14,16 0,12,15 | 7  | O55004,P02631,P20762,P55091,P98089,Q63598,Q9Z1F2                                                                                                                                                                                |
| 4230 | 1,3,5,9,11, 2,4,6,7,8,1<br>13,15,16 0,12,14 | 8  | O55004,P02631,P20762,P55091,P98089,Q62635,Q80WL1,Q9Z1F2                                                                                                                                                                         |
| 4231 | 1,3,5,9,11, 2,4,6,7,8,1<br>14,15,16 0,12,13 | 9  | O55004,P02631,P25809,P55091,P80299,P98089,Q63618,Q8CIZ5,Q9Z1F2                                                                                                                                                                  |
| 4232 | 1,3,5,9,12, 2,4,6,7,8,1<br>13,14,15 0,11,16 | 32 | O55004,P00714,P02631,P02780,P02781,P02782,P06761,P07150,P07151,P07647,P08723,P09456,P0C0A9,P11598,P12020,P20762,P22273,P22282,P22283,P24368,P28570,P30120,P46462,P50280,P55091,P98089,Q00715,Q4G075,Q5M8C6,Q63617,Q99041,Q9R0T3 |
| 4233 | 1,3,5,9,12, 2,4,6,7,8,1<br>13,14,16 0,11,15 | 13 | O55004,P02631,P06761,P07150,P11598,P20762,P22273,P22282,P50280,P55091,P98089,Q63617,Q99041                                                                                                                                      |
| 4234 | 1,3,5,9,12, 2,4,6,7,8,1<br>13,15,16 0,11,14 | 20 | O55004,P02631,P06761,P07150,P0C0A9,P11598,P12020,P20762,P22273,P22282,P50280,P55091,P98089,Q4G075,Q5GRG2,Q62635,Q63617,Q6B345,Q80WL1,Q99041                                                                                     |
| 4235 | 1,3,5,9,12, 2,4,6,7,8,1<br>14,15,16 0,11,13 | 18 | O55004,P00714,P02631,P02780,P06761,P11598,P22273,P22282,P25809,P46462,P50280,P55091,P98089,Q4G075,Q63617,Q8CIZ5,Q99041,Q9R0T3                                                                                                   |
| 4236 | 1,3,5,9,13, 2,4,6,7,8,1<br>14,15,16 0,11,12 | 19 | O55004,P02631,P02780,P06761,P07150,P11598,P12020,P22273,P22282,P31430,P46462,P50280,P55091,P98089,Q00715,Q5GRG2,Q5M8C6,Q63617,Q9R0T3                                                                                            |
| 4237 | 1,3,5,10,1 2,4,6,7,8,9<br>1,12,13,14 ,15,16 | 3  | P20762,P50280,P98089                                                                                                                                                                                                            |
| 4238 | 1,3,5,10,1 2,4,6,7,8,9<br>1,12,13,15 ,14,16 | 5  | D4A5U3,P20762,P23593,P98089,Q62635                                                                                                                                                                                              |
| 4239 | 1,3,5,10,1 2,4,6,7,8,9<br>1,12,13,16 ,14,15 | 4  | P47967,P97840,P98089,Q62635                                                                                                                                                                                                     |
| 4240 | 1,3,5,10,1 2,4,6,7,8,9<br>1,12,14,15 ,13,16 | 4  | D4A5U3,O55004,P02631,P98089                                                                                                                                                                                                     |
| 4241 | 1,3,5,10,1 2,4,6,7,8,9<br>1,12,14,16 ,13,15 | 3  | P02631,P98089,Q8CIZ5                                                                                                                                                                                                            |
| 4242 | 1,3,5,10,1 2,4,6,7,8,9<br>1,12,15,16 ,13,14 | 6  | D4A5U3,P02631,P98089,Q5QE79,Q62635,Q8CIZ5                                                                                                                                                                                       |

|      |                          |                          |    |                                                                                                                                                                                       |
|------|--------------------------|--------------------------|----|---------------------------------------------------------------------------------------------------------------------------------------------------------------------------------------|
| 4243 | 1,3,5,10,1<br>1,13,14,15 | 2,4,6,7,8,9<br>,12,16    | 2  | P02631,P98089                                                                                                                                                                         |
| 4244 | 1,3,5,10,1<br>1,13,14,16 | 2,4,6,7,8,9<br>,12,15    | 1  | P98089                                                                                                                                                                                |
| 4245 | 1,3,5,10,1<br>1,13,15,16 | 2,4,6,7,8,9<br>,12,14    | 3  | P98089,Q5QE79,Q62635                                                                                                                                                                  |
| 4246 | 1,3,5,10,1<br>1,14,15,16 | 2,4,6,7,8,9<br>,12,13    | 4  | P02631,P55091,P98089,Q8CIZ5                                                                                                                                                           |
| 4247 | 1,3,5,10,1<br>2,13,14,15 | 2,4,6,7,8,9<br>,11,16    | 26 | P00714,P02780,P02781,P02782,P06761,P07150,P07647,P08723,P09456,P0C0A9,P11598,P22273,P22282,P22283,P30120,P46462,P50280,P55091,P97523,P98089,Q5M8C6,Q63617,Q812E4,Q99041,Q9R0T3,Q9Z0J6 |
| 4248 | 1,3,5,10,1<br>2,13,14,16 | 2,4,6,7,8,9<br>,11,15    | 11 | P06761,P07150,P22273,P22282,P50280,P55091,P98089,Q63617,Q6P6R2,Q6P6S4,Q8CJ52                                                                                                          |
| 4249 | 1,3,5,10,1<br>2,13,15,16 | 2,4,6,7,8,9<br>,11,14    | 19 | D4A5U3,P06761,P07150,P11598,P12020,P22273,P22282,P46462,P50280,P55091,P98089,Q4G075,Q5GRG2,Q5QE79,Q62635,Q63617,Q6P6R2,Q812E4,Q99041                                                  |
| 4250 | 1,3,5,10,1<br>2,14,15,16 | 2,4,6,7,8,9<br>,11,13    | 16 | D4A5U3,P02631,P02780,P06761,P07150,P11598,P22273,P22282,P46462,P50280,P55091,P82471,P98089,Q63617,Q8CIZ5,Q99041                                                                       |
| 4251 | 1,3,5,10,1<br>3,14,15,16 | 2,4,6,7,8,9<br>,11,12    | 16 | P02780,P06761,P07150,P11598,P12020,P22273,P22282,P46462,P50280,P55091,P70709,P82471,P98089,Q5GRG2,Q63617,Q9R0T3                                                                       |
| 4252 | 1,3,5,11,1<br>2,13,14,15 | 2,4,6,7,8,9<br>,10,16    | 10 | O55004,P02454,P02631,P07151,P20762,P23739,P55091,P70545,P98089,Q9WVH8                                                                                                                 |
| 4253 | 1,3,5,11,1<br>2,13,14,16 | 2,4,6,7,8,9<br>,10,15    | 11 | O55004,P02454,P02631,P17559,P20762,P55091,P98089,Q6P6R2,Q811M5,Q9Z0V6,Q9Z1F2                                                                                                          |
| 4254 | 1,3,5,11,1<br>2,13,15,16 | 2,4,6,7,8,9<br>,10,14    | 11 | O55004,P02454,P02631,P17559,P20762,P55091,P98089,Q5QE79,Q62635,Q80WL1,Q9Z1F2                                                                                                          |
| 4255 | 1,3,5,11,1<br>2,14,15,16 | 2,4,6,7,8,9<br>,10,13    | 12 | D4A5U3,O55004,P02454,P02631,P17559,P55091,P80299,P98089,Q63618,Q8CIZ5,Q9WVH8,Q9Z1F2                                                                                                   |
| 4256 | 1,3,5,11,1<br>3,14,15,16 | 2,4,6,7,8,9<br>,10,12    | 7  | O55004,P02454,P02631,P17559,P55091,P98089,Q9Z1F2                                                                                                                                      |
| 4257 | 1,3,5,12,1<br>3,14,15,16 | 2,4,6,7,8,9<br>,10,11    | 16 | P02454,P02631,P06761,P07150,P11598,P22273,P22282,P50280,P55091,P70545,P98089,Q63617,Q6B345,Q6P6R2,Q6P6S4,Q9R0T3                                                                       |
| 4258 | 1,3,6,7,8,9<br>,10,11    | 2,4,5,12,1<br>3,14,15,16 | 4  | P35280,Q63493,Q6P6R2,Q6P6S4                                                                                                                                                           |
| 4259 | 1,3,6,7,8,9<br>,10,12    | 2,4,5,11,1<br>3,14,15,16 | 2  | O70417,Q63598                                                                                                                                                                         |
| 4260 | 1,3,6,7,8,9<br>,10,13    | 2,4,5,11,1<br>2,14,15,16 | 1  | P70549                                                                                                                                                                                |
| 4261 | 1,3,6,7,8,9<br>,10,14    | 2,4,5,11,1<br>2,13,15,16 | 4  | O70417,P08937,Q5QE79,Q63751                                                                                                                                                           |
| 4262 | 1,3,6,7,8,9<br>,10,15    | 2,4,5,11,1<br>2,13,14,16 | 6  | P02091,P19629,P35280,Q5RKI1,Q63598,Q6P6R2                                                                                                                                             |



|      |                        |                          |    |                                                                                                          |
|------|------------------------|--------------------------|----|----------------------------------------------------------------------------------------------------------|
| 4263 | 1,3,6,7,8,9<br>,10,16  | 2,4,5,11,1<br>2,13,14,15 | 2  | P19629,Q63598                                                                                            |
| 4264 | 1,3,6,7,8,9<br>,11,12  | 2,4,5,10,1<br>3,14,15,16 | 10 | iRT-Kit_WR_fusion,P06911,P09527,P35280,Q5GRG2,Q63493,Q63617,Q6P6S4,Q812E4,Q9QW07                         |
| 4265 | 1,3,6,7,8,9<br>,11,13  | 2,4,5,10,1<br>2,14,15,16 | 7  | P22283,P35280,Q63493,Q63617,Q6P6S4,Q812E4,Q9JI85                                                         |
| 4266 | 1,3,6,7,8,9<br>,11,14  | 2,4,5,10,1<br>2,13,15,16 | 11 | O70417,P06911,P08937,P0DMW0,P0DMW1,P35280,Q5GRG2,Q63493,Q63751,Q6P6S4,Q812E4,Q9QW07                      |
| 4267 | 1,3,6,7,8,9<br>,11,15  | 2,4,5,10,1<br>2,13,14,16 | 8  | P02091,P35280,Q63493,Q6IFW6,Q6P6R2,Q6P6S4,Q8CJ52,Q9QW07                                                  |
| 4268 | 1,3,6,7,8,9<br>,11,16  | 2,4,5,10,1<br>2,13,14,15 | 15 | P02782,P02783,P08723,P09456,P22283,P30120,P35280,P46462,Q5M8C6,Q63493,Q63617,Q6P6S4,Q812E4,Q9JHB9,Q9QW07 |
| 4269 | 1,3,6,7,8,9<br>,12,13  | 2,4,5,10,1<br>1,14,15,16 | 1  | P70549                                                                                                   |
| 4270 | 1,3,6,7,8,9<br>,12,14  | 2,4,5,10,1<br>1,13,15,16 | 3  | O70417,P21674,Q63751                                                                                     |
| 4271 | 1,3,6,7,8,9<br>,12,15  | 2,4,5,10,1<br>1,13,14,16 | 5  | iRT-Kit_WR_fusion,P02091,P19629,P35280,P70549                                                            |
| 4272 | 1,3,6,7,8,9<br>,12,16  | 2,4,5,10,1<br>1,13,14,15 | 1  | P21674                                                                                                   |
| 4273 | 1,3,6,7,8,9<br>,13,14  | 2,4,5,10,1<br>1,12,15,16 | 3  | P70549,Q5QE79,Q63751                                                                                     |
| 4274 | 1,3,6,7,8,9<br>,13,15  | 2,4,5,10,1<br>1,12,14,16 | 3  | P02091,P35280,P70549                                                                                     |
| 4275 | 1,3,6,7,8,9<br>,13,16  | 2,4,5,10,1<br>1,12,14,15 | 1  | P70549                                                                                                   |
| 4276 | 1,3,6,7,8,9<br>,14,15  | 2,4,5,10,1<br>1,12,13,16 | 2  | P02091,P35280                                                                                            |
| 4277 | 1,3,6,7,8,9<br>,14,16  | 2,4,5,10,1<br>1,12,13,15 | 3  | O70417,P02783,P21674                                                                                     |
| 4278 | 1,3,6,7,8,9<br>,15,16  | 2,4,5,10,1<br>1,12,13,14 | 4  | P02091,P02783,P19629,P35280                                                                              |
| 4279 | 1,3,6,7,8,1<br>0,11,12 | 2,4,5,9,13,<br>14,15,16  | 5  | P06911,P19629,P22283,Q63493,Q9QW07                                                                       |
| 4280 | 1,3,6,7,8,1<br>0,11,13 | 2,4,5,9,12,<br>14,15,16  | 3  | P22283,Q63493,Q9JI85                                                                                     |
| 4281 | 1,3,6,7,8,1<br>0,11,14 | 2,4,5,9,12,<br>13,15,16  | 5  | O70417,P08937,Q5GRG2,Q63493,Q63751                                                                       |
| 4282 | 1,3,6,7,8,1<br>0,11,15 | 2,4,5,9,12,<br>13,14,16  | 8  | P01946,P02091,P19629,Q5RKI1,Q63493,Q6IFW6,Q6P6S4,Q9QW07                                                  |

|      |                        |                         |    |                                                                                                                                                                                                                                               |
|------|------------------------|-------------------------|----|-----------------------------------------------------------------------------------------------------------------------------------------------------------------------------------------------------------------------------------------------|
| 4283 | 1,3,6,7,8,1<br>0,11,16 | 2,4,5,9,12,<br>13,14,15 | 17 | P02781,P02782,P02783,P08010,P08723,P0C0A9,P19629,P22283,P24368,P30120,P46462,P57113,Q5M8C6,Q63493,Q9JHB9,Q9QW07,Q9WTW7                                                                                                                        |
| 4284 | 1,3,6,7,8,1<br>0,12,13 | 2,4,5,9,11,<br>14,15,16 | 3  | P57113,P70549,Q63598                                                                                                                                                                                                                          |
| 4285 | 1,3,6,7,8,1<br>0,12,14 | 2,4,5,9,11,<br>13,15,16 | 5  | O70417,P08937,P57113,P70549,Q63751                                                                                                                                                                                                            |
| 4286 | 1,3,6,7,8,1<br>0,12,15 | 2,4,5,9,11,<br>13,14,16 | 8  | P02091,P19629,P57113,P70549,Q05175,Q5RKI1,Q63598,Q9WTW7                                                                                                                                                                                       |
| 4287 | 1,3,6,7,8,1<br>0,12,16 | 2,4,5,9,11,<br>13,14,15 | 8  | P19629,P46844,P53790,P57113,Q3ZAV1,Q63598,Q6AY41,Q9WTW7                                                                                                                                                                                       |
| 4288 | 1,3,6,7,8,1<br>0,13,14 | 2,4,5,9,11,<br>12,15,16 | 5  | P08937,P57113,P63081,P70549,Q62714                                                                                                                                                                                                            |
| 4289 | 1,3,6,7,8,1<br>0,13,15 | 2,4,5,9,11,<br>12,14,16 | 13 | O70377,O70594,P01946,P02091,P19468,P19629,P57113,P70549,Q05175,Q5RKI1,Q62714,Q63598,Q64093                                                                                                                                                    |
| 4290 | 1,3,6,7,8,1<br>0,13,16 | 2,4,5,9,11,<br>12,14,15 | 15 | O35077,O70257,O70594,P19468,P19629,P46844,P53790,P57113,P70549,Q3ZAV1,Q63424,Q63598,Q64093,Q6AY41,Q9WTW7                                                                                                                                      |
| 4291 | 1,3,6,7,8,1<br>0,14,15 | 2,4,5,9,11,<br>12,13,16 | 12 | O70377,P01946,P02091,P19629,P54921,P57113,P70549,Q03191,Q05175,Q5RKI1,Q62714,Q63598                                                                                                                                                           |
| 4292 | 1,3,6,7,8,1<br>0,14,16 | 2,4,5,9,11,<br>12,13,15 | 8  | O35077,O70417,P02783,P19629,P46844,P53790,P57113,Q923S2                                                                                                                                                                                       |
| 4293 | 1,3,6,7,8,1<br>0,15,16 | 2,4,5,9,11,<br>12,13,14 | 34 | O35077,O70377,O70594,P01946,P02091,P02783,P19468,P19629,P29975,P38918,P46844,P48508,P53790,P57113,Q03191,Q03248,Q05175,Q3ZAV1,Q5I0E9,Q5M7T9,Q5RKI1,Q63270,Q63424,Q63598,Q64093,Q6AY41,Q6MG61,Q6Q0N1,Q80W57,Q8R431,Q923S2,Q9R1T5,Q9WTW7,Q9Z0W7 |
| 4294 | 1,3,6,7,8,1<br>1,12,13 | 2,4,5,9,10,<br>14,15,16 | 8  | P06911,P12020,P22283,P46462,P47967,Q5GRG2,Q63493,Q9JI85                                                                                                                                                                                       |
| 4295 | 1,3,6,7,8,1<br>1,12,14 | 2,4,5,9,10,<br>13,15,16 | 8  | O70417,P06911,P12020,P22283,Q5GRG2,Q63493,Q63751,Q9QW07                                                                                                                                                                                       |
| 4296 | 1,3,6,7,8,1<br>1,12,15 | 2,4,5,9,10,<br>13,14,16 | 8  | P02091,P06911,P19629,P22283,Q5GRG2,Q63493,Q6IFW6,Q9QW07                                                                                                                                                                                       |
| 4297 | 1,3,6,7,8,1<br>1,12,16 | 2,4,5,9,10,<br>13,14,15 | 22 | O35547,P02780,P02781,P02782,P02783,P06911,P07647,P08010,P08723,P09456,P12020,P22283,P30120,P46462,Q5GRG2,Q5M8C6,Q63493,Q8CFN2,Q9JHB9,Q9JI85,Q9QW07,Q9QZK9                                                                                     |
| 4298 | 1,3,6,7,8,1<br>1,13,14 | 2,4,5,9,10,<br>12,15,16 | 7  | P06911,P22283,P46462,Q5GRG2,Q63493,Q99041,Q9JI85                                                                                                                                                                                              |
| 4299 | 1,3,6,7,8,1<br>1,13,15 | 2,4,5,9,10,<br>12,14,16 | 6  | P02091,P22283,Q63493,Q6IFW6,Q8CJ52,Q9JI85                                                                                                                                                                                                     |
| 4300 | 1,3,6,7,8,1<br>1,13,16 | 2,4,5,9,10,<br>12,14,15 | 22 | P02780,P02781,P02782,P02783,P05369,P06761,P06911,P07647,P08010,P08723,P09456,P22283,P24368,P30120,P46462,Q5M8C6,Q62902,Q63493,Q63617,Q9JHB9,Q9JI85,Q9QW07                                                                                     |
| 4301 | 1,3,6,7,8,1<br>1,14,15 | 2,4,5,9,10,<br>12,13,16 | 6  | P02091,Q5GRG2,Q63493,Q6IFW6,Q8CJ52,Q9QW07                                                                                                                                                                                                     |

|      |                        |                         |    |                                                                                                                                                 |
|------|------------------------|-------------------------|----|-------------------------------------------------------------------------------------------------------------------------------------------------|
| 4302 | 1,3,6,7,8,1<br>1,14,16 | 2,4,5,9,10,<br>12,13,15 | 20 | P02781,P02782,P02783,P06911,P08010,P08723,P09456,P0C0A9,P22283,P30120,P46462,Q5GR<br>G2,Q5M8C6,Q63493,Q812E4,Q8CFN2,Q99041,Q9JHB9,Q9QW07,Q9QZK9 |
| 4303 | 1,3,6,7,8,1<br>1,15,16 | 2,4,5,9,10,<br>12,13,14 | 18 | P02091,P02781,P02782,P02783,P08010,P08723,P0C0A9,P19629,P22283,P30120,P46462,Q5M8<br>C6,Q63493,Q6IFW6,Q8CJ52,Q9JHB9,Q9QW07,Q9QZK9               |
| 4304 | 1,3,6,7,8,1<br>2,13,14 | 2,4,5,9,10,<br>11,15,16 | 2  | P70549,Q9Z2L0                                                                                                                                   |
| 4305 | 1,3,6,7,8,1<br>2,13,15 | 2,4,5,9,10,<br>11,14,16 | 3  | P02091,P70549,Q9Z2L0                                                                                                                            |
| 4306 | 1,3,6,7,8,1<br>2,13,16 | 2,4,5,9,10,<br>11,14,15 | 1  | P70549                                                                                                                                          |
| 4307 | 1,3,6,7,8,1<br>2,14,15 | 2,4,5,9,10,<br>11,13,16 | 2  | P02091,P70549                                                                                                                                   |
| 4308 | 1,3,6,7,8,1<br>2,14,16 | 2,4,5,9,10,<br>11,13,15 | 3  | O70417,P02783,P21674                                                                                                                            |
| 4309 | 1,3,6,7,8,1<br>2,15,16 | 2,4,5,9,10,<br>11,13,14 | 5  | P02091,P02783,P19629,P70549,Q63598                                                                                                              |
| 4310 | 1,3,6,7,8,1<br>3,14,15 | 2,4,5,9,10,<br>11,12,16 | 5  | P02091,P70549,Q03191,Q62714,Q9Z2L0                                                                                                              |
| 4311 | 1,3,6,7,8,1<br>3,14,16 | 2,4,5,9,10,<br>11,12,15 | 4  | P02783,P70549,Q62714,Q9Z2L0                                                                                                                     |
| 4312 | 1,3,6,7,8,1<br>3,15,16 | 2,4,5,9,10,<br>11,12,14 | 7  | O35077,P02091,P02783,P19629,P70549,Q03191,Q62714                                                                                                |
| 4313 | 1,3,6,7,8,1<br>4,15,16 | 2,4,5,9,10,<br>11,12,13 | 7  | P02091,P02783,P19629,P57113,P70549,Q03191,Q62714                                                                                                |
| 4314 | 1,3,6,7,9,1<br>0,11,12 | 2,4,5,8,13,<br>14,15,16 | 0  |                                                                                                                                                 |
| 4315 | 1,3,6,7,9,1<br>0,11,13 | 2,4,5,8,12,<br>14,15,16 | 0  |                                                                                                                                                 |
| 4316 | 1,3,6,7,9,1<br>0,11,14 | 2,4,5,8,12,<br>13,15,16 | 0  |                                                                                                                                                 |
| 4317 | 1,3,6,7,9,1<br>0,11,15 | 2,4,5,8,12,<br>13,14,16 | 2  | P02091,Q5RKI1                                                                                                                                   |
| 4318 | 1,3,6,7,9,1<br>0,11,16 | 2,4,5,8,12,<br>13,14,15 | 0  |                                                                                                                                                 |
| 4319 | 1,3,6,7,9,1<br>0,12,13 | 2,4,5,8,11,<br>14,15,16 | 2  | P70549,Q6IFU8                                                                                                                                   |
| 4320 | 1,3,6,7,9,1<br>0,12,14 | 2,4,5,8,11,<br>13,15,16 | 0  |                                                                                                                                                 |
| 4321 | 1,3,6,7,9,1<br>0,12,15 | 2,4,5,8,11,<br>13,14,16 | 3  | O54728,P02091,Q5RKI1                                                                                                                            |

|      |                        |                         |                               |
|------|------------------------|-------------------------|-------------------------------|
| 4322 | 1,3,6,7,9,1<br>0,12,16 | 2,4,5,8,11,<br>13,14,15 | 1 P21674                      |
| 4323 | 1,3,6,7,9,1<br>0,13,14 | 2,4,5,8,11,<br>12,15,16 | 1 P70549                      |
| 4324 | 1,3,6,7,9,1<br>0,13,15 | 2,4,5,8,11,<br>12,14,16 | 4 P02091,P70549,Q00715,Q5RKI1 |
| 4325 | 1,3,6,7,9,1<br>0,13,16 | 2,4,5,8,11,<br>12,14,15 | 0                             |
| 4326 | 1,3,6,7,9,1<br>0,14,15 | 2,4,5,8,11,<br>12,13,16 | 3 P01946,P02091,Q5RKI1        |
| 4327 | 1,3,6,7,9,1<br>0,14,16 | 2,4,5,8,11,<br>12,13,15 | 0                             |
| 4328 | 1,3,6,7,9,1<br>0,15,16 | 2,4,5,8,11,<br>12,13,14 | 2 P02091,Q5RKI1               |
| 4329 | 1,3,6,7,9,1<br>1,12,13 | 2,4,5,8,10,<br>14,15,16 | 1 P20762                      |
| 4330 | 1,3,6,7,9,1<br>1,12,14 | 2,4,5,8,10,<br>13,15,16 | 0                             |
| 4331 | 1,3,6,7,9,1<br>1,12,15 | 2,4,5,8,10,<br>13,14,16 | 1 P02091                      |
| 4332 | 1,3,6,7,9,1<br>1,12,16 | 2,4,5,8,10,<br>13,14,15 | 1 Q9QW07                      |
| 4333 | 1,3,6,7,9,1<br>1,13,14 | 2,4,5,8,10,<br>12,15,16 | 1 P0DMW0;P0DMW1               |
| 4334 | 1,3,6,7,9,1<br>1,13,15 | 2,4,5,8,10,<br>12,14,16 | 2 P02091,P0DMW0;P0DMW1        |
| 4335 | 1,3,6,7,9,1<br>1,13,16 | 2,4,5,8,10,<br>12,14,15 | 0                             |
| 4336 | 1,3,6,7,9,1<br>1,14,15 | 2,4,5,8,10,<br>12,13,16 | 3 P02091,P0DMW0;P0DMW1,P35280 |
| 4337 | 1,3,6,7,9,1<br>1,14,16 | 2,4,5,8,10,<br>12,13,15 | 1 P02783                      |
| 4338 | 1,3,6,7,9,1<br>1,15,16 | 2,4,5,8,10,<br>12,13,14 | 4 P02091,P02783,Q8CJ52,Q9QW07 |
| 4339 | 1,3,6,7,9,1<br>2,13,14 | 2,4,5,8,10,<br>11,15,16 | 1 P70549                      |
| 4340 | 1,3,6,7,9,1<br>2,13,15 | 2,4,5,8,10,<br>11,14,16 | 2 P02091,P70549               |
| 4341 | 1,3,6,7,9,1<br>2,13,16 | 2,4,5,8,10,<br>11,14,15 | 1 P70549                      |

|      |                         |                         |                                      |
|------|-------------------------|-------------------------|--------------------------------------|
| 4342 | 1,3,6,7,9,1<br>2,14,15  | 2,4,5,8,10,<br>11,13,16 | 1 P02091                             |
| 4343 | 1,3,6,7,9,1<br>2,14,16  | 2,4,5,8,10,<br>11,13,15 | 1 P21674                             |
| 4344 | 1,3,6,7,9,1<br>2,15,16  | 2,4,5,8,10,<br>11,13,14 | 1 P02091                             |
| 4345 | 1,3,6,7,9,1<br>3,14,15  | 2,4,5,8,10,<br>11,12,16 | 4 P02091,P0DMW0;P0DMW1,P70549,Q00715 |
| 4346 | 1,3,6,7,9,1<br>3,14,16  | 2,4,5,8,10,<br>11,12,15 | 0                                    |
| 4347 | 1,3,6,7,9,1<br>3,15,16  | 2,4,5,8,10,<br>11,12,14 | 2 P02091,P70549                      |
| 4348 | 1,3,6,7,9,1<br>4,15,16  | 2,4,5,8,10,<br>11,12,13 | 2 P02091,P02783                      |
| 4349 | 1,3,6,7,10,<br>11,12,13 | 2,4,5,8,9,1<br>4,15,16  | 3 P20760,P23593,P47967               |
| 4350 | 1,3,6,7,10,<br>11,12,14 | 2,4,5,8,9,1<br>3,15,16  | 0                                    |
| 4351 | 1,3,6,7,10,<br>11,12,15 | 2,4,5,8,9,1<br>3,14,16  | 3 P02091,P20760,Q5RKI1               |
| 4352 | 1,3,6,7,10,<br>11,12,16 | 2,4,5,8,9,1<br>3,14,15  | 1 P02783                             |
| 4353 | 1,3,6,7,10,<br>11,13,14 | 2,4,5,8,9,1<br>2,15,16  | 0                                    |
| 4354 | 1,3,6,7,10,<br>11,13,15 | 2,4,5,8,9,1<br>2,14,16  | 3 P02091,Q5RKI1,Q8CJD3               |
| 4355 | 1,3,6,7,10,<br>11,13,16 | 2,4,5,8,9,1<br>2,14,15  | 1 P36376                             |
| 4356 | 1,3,6,7,10,<br>11,14,15 | 2,4,5,8,9,1<br>2,13,16  | 3 P01946,P02091,Q5RKI1               |
| 4357 | 1,3,6,7,10,<br>11,14,16 | 2,4,5,8,9,1<br>2,13,15  | 2 P02783,P36376                      |
| 4358 | 1,3,6,7,10,<br>11,15,16 | 2,4,5,8,9,1<br>2,13,14  | 4 P01946,P02091,P02783,Q5RKI1        |
| 4359 | 1,3,6,7,10,<br>12,13,14 | 2,4,5,8,9,1<br>1,15,16  | 2 P01835,P70549                      |
| 4360 | 1,3,6,7,10,<br>12,13,15 | 2,4,5,8,9,1<br>1,14,16  | 3 P02091,P70549,Q5RKI1               |
| 4361 | 1,3,6,7,10,<br>12,13,16 | 2,4,5,8,9,1<br>1,14,15  | 2 P57113,P70549                      |

|      |                                             |                                                                  |
|------|---------------------------------------------|------------------------------------------------------------------|
| 4362 | 1,3,6,7,10, 2,4,5,8,9,1<br>12,14,15 1,13,16 | 4 P01946,P02091,P70549,Q5RKI1                                    |
| 4363 | 1,3,6,7,10, 2,4,5,8,9,1<br>12,14,16 1,13,15 | 2 P02783,P57113                                                  |
| 4364 | 1,3,6,7,10, 2,4,5,8,9,1<br>12,15,16 1,13,14 | 4 P02091,P57113,Q5RKI1,Q63598                                    |
| 4365 | 1,3,6,7,10, 2,4,5,8,9,1<br>13,14,15 1,12,16 | 6 P01835,P01946,P02091,P05539,P70549,Q5RKI1                      |
| 4366 | 1,3,6,7,10, 2,4,5,8,9,1<br>13,14,16 1,12,15 | 4 P01835,P36376,P57113,P70549                                    |
| 4367 | 1,3,6,7,10, 2,4,5,8,9,1<br>13,15,16 1,12,14 | 7 P01835,P02091,P19468,P51792;P51794;P51796,P57113,P70549,Q5RKI1 |
| 4368 | 1,3,6,7,10, 2,4,5,8,9,1<br>14,15,16 1,12,13 | 5 P01946,P02091,P02783,P57113,Q5RKI1                             |
| 4369 | 1,3,6,7,11, 2,4,5,8,9,1<br>12,13,14 0,15,16 | 0                                                                |
| 4370 | 1,3,6,7,11, 2,4,5,8,9,1<br>12,13,15 0,14,16 | 2 P02091,P20760                                                  |
| 4371 | 1,3,6,7,11, 2,4,5,8,9,1<br>12,13,16 0,14,15 | 3 P05369,P22283,P47967                                           |
| 4372 | 1,3,6,7,11, 2,4,5,8,9,1<br>12,14,15 0,13,16 | 1 P02091                                                         |
| 4373 | 1,3,6,7,11, 2,4,5,8,9,1<br>12,14,16 0,13,15 | 1 P02783                                                         |
| 4374 | 1,3,6,7,11, 2,4,5,8,9,1<br>12,15,16 0,13,14 | 3 P02091,P02783,Q9QW07                                           |
| 4375 | 1,3,6,7,11, 2,4,5,8,9,1<br>13,14,15 0,12,16 | 1 P02091                                                         |
| 4376 | 1,3,6,7,11, 2,4,5,8,9,1<br>13,14,16 0,12,15 | 3 P02783,P34901,P36376                                           |
| 4377 | 1,3,6,7,11, 2,4,5,8,9,1<br>13,15,16 0,12,14 | 3 P02091,P02783,Q8CJ52                                           |
| 4378 | 1,3,6,7,11, 2,4,5,8,9,1<br>14,15,16 0,12,13 | 3 P02091,P02783,Q8CJ52                                           |
| 4379 | 1,3,6,7,12, 2,4,5,8,9,1<br>13,14,15 0,11,16 | 3 P01835,P02091,P70549                                           |
| 4380 | 1,3,6,7,12, 2,4,5,8,9,1<br>13,14,16 0,11,15 | 2 P01835,P70549                                                  |
| 4381 | 1,3,6,7,12, 2,4,5,8,9,1<br>13,15,16 0,11,14 | 3 P01835,P02091,P70549                                           |

|      |                                             |                                      |
|------|---------------------------------------------|--------------------------------------|
| 4382 | 1,3,6,7,12, 2,4,5,8,9,1<br>14,15,16 0,11,13 | 3 P02091,P02783,P70549               |
| 4383 | 1,3,6,7,13, 2,4,5,8,9,1<br>14,15,16 0,11,12 | 5 P01835,P02091,P02783,P70549,Q62714 |
| 4384 | 1,3,6,8,9,1 2,4,5,7,13,<br>0,11,12 14,15,16 | 1 Q6P6S4                             |
| 4385 | 1,3,6,8,9,1 2,4,5,7,12,<br>0,11,13 14,15,16 | 1 Q6P6S4                             |
| 4386 | 1,3,6,8,9,1 2,4,5,7,12,<br>0,11,14 13,15,16 | 0                                    |
| 4387 | 1,3,6,8,9,1 2,4,5,7,12,<br>0,11,15 13,14,16 | 2 P02091,Q6P6S4                      |
| 4388 | 1,3,6,8,9,1 2,4,5,7,12,<br>0,11,16 13,14,15 | 1 Q6P6S4                             |
| 4389 | 1,3,6,8,9,1 2,4,5,7,11,<br>0,12,13 14,15,16 | 1 P70549                             |
| 4390 | 1,3,6,8,9,1 2,4,5,7,11,<br>0,12,14 13,15,16 | 1 O70417                             |
| 4391 | 1,3,6,8,9,1 2,4,5,7,11,<br>0,12,15 13,14,16 | 1 P02091                             |
| 4392 | 1,3,6,8,9,1 2,4,5,7,11,<br>0,12,16 13,14,15 | 1 P21674                             |
| 4393 | 1,3,6,8,9,1 2,4,5,7,11,<br>0,13,14 12,15,16 | 1 P70549                             |
| 4394 | 1,3,6,8,9,1 2,4,5,7,11,<br>0,13,15 12,14,16 | 4 P02091,P62804,P70549,Q00715        |
| 4395 | 1,3,6,8,9,1 2,4,5,7,11,<br>0,13,16 12,14,15 | 0                                    |
| 4396 | 1,3,6,8,9,1 2,4,5,7,11,<br>0,14,15 12,13,16 | 2 P01946,P02091                      |
| 4397 | 1,3,6,8,9,1 2,4,5,7,11,<br>0,14,16 12,13,15 | 0                                    |
| 4398 | 1,3,6,8,9,1 2,4,5,7,11,<br>0,15,16 12,13,14 | 1 P02091                             |
| 4399 | 1,3,6,8,9,1 2,4,5,7,10,<br>1,12,13 14,15,16 | 1 P09527                             |
| 4400 | 1,3,6,8,9,1 2,4,5,7,10,<br>1,12,14 13,15,16 | 1 P09527                             |
| 4401 | 1,3,6,8,9,1 2,4,5,7,10,<br>1,12,15 13,14,16 | 4 P02091,P09527,Q6P6S4,Q9QW07        |

|      |                         |                         |   |                                           |
|------|-------------------------|-------------------------|---|-------------------------------------------|
| 4402 | 1,3,6,8,9,1<br>1,12,16  | 2,4,5,7,10,<br>13,14,15 | 4 | O88797,P09527,Q6P6S4,Q9QW07               |
| 4403 | 1,3,6,8,9,1<br>1,13,14  | 2,4,5,7,10,<br>12,15,16 | 2 | P09527,P0DMW0;P0DMW1                      |
| 4404 | 1,3,6,8,9,1<br>1,13,15  | 2,4,5,7,10,<br>12,14,16 | 3 | P02091,P09527,Q6P6S4                      |
| 4405 | 1,3,6,8,9,1<br>1,13,16  | 2,4,5,7,10,<br>12,14,15 | 1 | P30120                                    |
| 4406 | 1,3,6,8,9,1<br>1,14,15  | 2,4,5,7,10,<br>12,13,16 | 4 | P02091,P09527,P0DMW0;P0DMW1,Q6P6S4        |
| 4407 | 1,3,6,8,9,1<br>1,14,16  | 2,4,5,7,10,<br>12,13,15 | 2 | P02783,Q812E4                             |
| 4408 | 1,3,6,8,9,1<br>1,15,16  | 2,4,5,7,10,<br>12,13,14 | 4 | P02091,P02783,Q6P6S4,Q9QW07               |
| 4409 | 1,3,6,8,9,1<br>2,13,14  | 2,4,5,7,10,<br>11,15,16 | 2 | P17988,P70549                             |
| 4410 | 1,3,6,8,9,1<br>2,13,15  | 2,4,5,7,10,<br>11,14,16 | 2 | P02091,P70549                             |
| 4411 | 1,3,6,8,9,1<br>2,13,16  | 2,4,5,7,10,<br>11,14,15 | 1 | P70549                                    |
| 4412 | 1,3,6,8,9,1<br>2,14,15  | 2,4,5,7,10,<br>11,13,16 | 2 | P02091,P70549                             |
| 4413 | 1,3,6,8,9,1<br>2,14,16  | 2,4,5,7,10,<br>11,13,15 | 1 | P21674                                    |
| 4414 | 1,3,6,8,9,1<br>2,15,16  | 2,4,5,7,10,<br>11,13,14 | 1 | P02091                                    |
| 4415 | 1,3,6,8,9,1<br>3,14,15  | 2,4,5,7,10,<br>11,12,16 | 3 | P02091,P70549,Q00715                      |
| 4416 | 1,3,6,8,9,1<br>3,14,16  | 2,4,5,7,10,<br>11,12,15 | 0 |                                           |
| 4417 | 1,3,6,8,9,1<br>3,15,16  | 2,4,5,7,10,<br>11,12,14 | 2 | P02091,P70549                             |
| 4418 | 1,3,6,8,9,1<br>4,15,16  | 2,4,5,7,10,<br>11,12,13 | 6 | P02091,P02783,P23593,P47967,P97840,Q5I0D1 |
| 4419 | 1,3,6,8,10,<br>11,12,13 | 2,4,5,7,9,1<br>4,15,16  | 0 |                                           |
| 4420 | 1,3,6,8,10,<br>11,12,14 | 2,4,5,7,9,1<br>3,15,16  | 0 |                                           |
| 4421 | 1,3,6,8,10,<br>11,12,15 | 2,4,5,7,9,1<br>3,14,16  | 3 | P02091,Q6IFW6,Q9R168                      |



|      |                                             |                                             |
|------|---------------------------------------------|---------------------------------------------|
| 4422 | 1,3,6,8,10, 2,4,5,7,9,1<br>11,12,16 3,14,15 | 2 P02783,Q9QW07                             |
| 4423 | 1,3,6,8,10, 2,4,5,7,9,1<br>11,13,14 2,15,16 | 0                                           |
| 4424 | 1,3,6,8,10, 2,4,5,7,9,1<br>11,13,15 2,14,16 | 3 P01946,P02091,Q6IFU7                      |
| 4425 | 1,3,6,8,10, 2,4,5,7,9,1<br>11,13,16 2,14,15 | 1 P30120                                    |
| 4426 | 1,3,6,8,10, 2,4,5,7,9,1<br>11,14,15 2,13,16 | 3 P01946,P02091,Q6IFU7                      |
| 4427 | 1,3,6,8,10, 2,4,5,7,9,1<br>11,14,16 2,13,15 | 1 P02783                                    |
| 4428 | 1,3,6,8,10, 2,4,5,7,9,1<br>11,15,16 2,13,14 | 5 P01946,P02091,P02783,Q6IFW6,Q9QW07        |
| 4429 | 1,3,6,8,10, 2,4,5,7,9,1<br>12,13,14 1,15,16 | 1 P70549                                    |
| 4430 | 1,3,6,8,10, 2,4,5,7,9,1<br>12,13,15 1,14,16 | 3 P02091,P70549,Q9R168                      |
| 4431 | 1,3,6,8,10, 2,4,5,7,9,1<br>12,13,16 1,14,15 | 1 P70549                                    |
| 4432 | 1,3,6,8,10, 2,4,5,7,9,1<br>12,14,15 1,13,16 | 6 P01946,P02091,P54921,P70549,Q9R168,Q9Z0J6 |
| 4433 | 1,3,6,8,10, 2,4,5,7,9,1<br>12,14,16 1,13,15 | 1 P02783                                    |
| 4434 | 1,3,6,8,10, 2,4,5,7,9,1<br>12,15,16 1,13,14 | 2 P02091,Q9R168                             |
| 4435 | 1,3,6,8,10, 2,4,5,7,9,1<br>13,14,15 1,12,16 | 4 P01946,P02091,P70549,Q03191               |
| 4436 | 1,3,6,8,10, 2,4,5,7,9,1<br>13,14,16 1,12,15 | 2 P14668,P70549                             |
| 4437 | 1,3,6,8,10, 2,4,5,7,9,1<br>13,15,16 1,12,14 | 5 O35077,P01946,P02091,P70549,Q03191        |
| 4438 | 1,3,6,8,10, 2,4,5,7,9,1<br>14,15,16 1,12,13 | 6 O35077,P01946,P02091,P02783,P54921,Q03191 |
| 4439 | 1,3,6,8,11, 2,4,5,7,9,1<br>12,13,14 0,15,16 | 0                                           |
| 4440 | 1,3,6,8,11, 2,4,5,7,9,1<br>12,13,15 0,14,16 | 3 P02091,P70549,Q9R168                      |
| 4441 | 1,3,6,8,11, 2,4,5,7,9,1<br>12,13,16 0,14,15 | 1 P30120                                    |

|      |                                             |                                                    |
|------|---------------------------------------------|----------------------------------------------------|
| 4442 | 1,3,6,8,11, 2,4,5,7,9,1<br>12,14,15 0,13,16 | 1 P02091                                           |
| 4443 | 1,3,6,8,11, 2,4,5,7,9,1<br>12,14,16 0,13,15 | 3 P02783,Q8CFN2,Q9QW07                             |
| 4444 | 1,3,6,8,11, 2,4,5,7,9,1<br>12,15,16 0,13,14 | 5 P02091,P02783,Q6IFW6,Q9QW07,Q9QZK9               |
| 4445 | 1,3,6,8,11, 2,4,5,7,9,1<br>13,14,15 0,12,16 | 2 P02091,Q6IFU7                                    |
| 4446 | 1,3,6,8,11, 2,4,5,7,9,1<br>13,14,16 0,12,15 | 2 P02783,P30120                                    |
| 4447 | 1,3,6,8,11, 2,4,5,7,9,1<br>13,15,16 0,12,14 | 4 P02091,P02783,P30120,Q6IFW6                      |
| 4448 | 1,3,6,8,11, 2,4,5,7,9,1<br>14,15,16 0,12,13 | 6 P01946,P02091,P02783,Q6IFW6,Q9QW07,Q9QZK9        |
| 4449 | 1,3,6,8,12, 2,4,5,7,9,1<br>13,14,15 0,11,16 | 3 P02091,P70549,Q9R168                             |
| 4450 | 1,3,6,8,12, 2,4,5,7,9,1<br>13,14,16 0,11,15 | 1 P70549                                           |
| 4451 | 1,3,6,8,12, 2,4,5,7,9,1<br>13,15,16 0,11,14 | 3 P02091,P70549,Q9R168                             |
| 4452 | 1,3,6,8,12, 2,4,5,7,9,1<br>14,15,16 0,11,13 | 3 P02091,P02783,P70549                             |
| 4453 | 1,3,6,8,13, 2,4,5,7,9,1<br>14,15,16 0,11,12 | 6 P01946,P02091,P02783,P70549,Q03191,Q62714        |
| 4454 | 1,3,6,9,10, 2,4,5,7,8,1<br>11,12,13 4,15,16 | 5 B0LT89,P20760,P20762,Q4G075,Q6TMA8               |
| 4455 | 1,3,6,9,10, 2,4,5,7,8,1<br>11,12,14 3,15,16 | 3 P20762,Q4G075,Q6TMA8                             |
| 4456 | 1,3,6,9,10, 2,4,5,7,8,1<br>11,12,15 3,14,16 | 7 P02091,P20760,P20762,P25809,Q4G075,Q6TMA8,Q9WUW8 |
| 4457 | 1,3,6,9,10, 2,4,5,7,8,1<br>11,12,16 3,14,15 | 4 P25809,Q4G075,Q6TMA8,Q8CIZ5                      |
| 4458 | 1,3,6,9,10, 2,4,5,7,8,1<br>11,13,14 2,15,16 | 2 P20762,Q6TMA8                                    |
| 4459 | 1,3,6,9,10, 2,4,5,7,8,1<br>11,13,15 2,14,16 | 5 P02091,P20762,Q4G075,Q5RLM2,Q6TMA8               |
| 4460 | 1,3,6,9,10, 2,4,5,7,8,1<br>11,13,16 2,14,15 | 2 P20762,Q6TMA8                                    |
| 4461 | 1,3,6,9,10, 2,4,5,7,8,1<br>11,14,15 2,13,16 | 3 P01946,P02091,Q6TMA8                             |

|      |                                             |    |                                                                                                                                             |
|------|---------------------------------------------|----|---------------------------------------------------------------------------------------------------------------------------------------------|
| 4462 | 1,3,6,9,10, 2,4,5,7,8,1<br>11,14,16 2,13,15 | 3  | P02783,Q6TMA8,Q8CIZ5                                                                                                                        |
| 4463 | 1,3,6,9,10, 2,4,5,7,8,1<br>11,15,16 2,13,14 | 5  | P02091,P25809,Q4G075,Q6TMA8,Q8CIZ5                                                                                                          |
| 4464 | 1,3,6,9,10, 2,4,5,7,8,1<br>12,13,14 1,15,16 | 9  | P02780,P06760,P0C0A9,P20762,P22273,P70549,Q4G075,Q6IFU8,Q6TMA8                                                                              |
| 4465 | 1,3,6,9,10, 2,4,5,7,8,1<br>12,13,15 1,14,16 | 13 | P02091,P02780,P02781,P06760,P07150,P09456,P0C0A9,P20762,P22273,P70549,Q00715,Q4G075,Q6TMA8                                                  |
| 4466 | 1,3,6,9,10, 2,4,5,7,8,1<br>12,13,16 1,14,15 | 6  | P06760,P07150,P20762,Q4G075,Q6IFU8,Q6TMA8                                                                                                   |
| 4467 | 1,3,6,9,10, 2,4,5,7,8,1<br>12,14,15 1,13,16 | 13 | P01946,P02091,P02780,P02781,P02782,P06760,P09456,P22273,P30120,Q00715,Q4G075,Q6TMA8,Q9Z0J6                                                  |
| 4468 | 1,3,6,9,10, 2,4,5,7,8,1<br>12,14,16 1,13,15 | 5  | P06760,P22273,Q4G075,Q6IFU8,Q6TMA8                                                                                                          |
| 4469 | 1,3,6,9,10, 2,4,5,7,8,1<br>12,15,16 1,13,14 | 7  | P02091,P06760,P22273,P25809,Q4G075,Q6TMA8,Q8CIZ5                                                                                            |
| 4470 | 1,3,6,9,10, 2,4,5,7,8,1<br>13,14,15 1,12,16 | 15 | P01946,P02091,P02780,P02781,P06760,P09456,P22273,P30120,P62804,P70549,Q00715,Q4G075,Q5M8C6,Q5PQL7,Q6TMA8                                    |
| 4471 | 1,3,6,9,10, 2,4,5,7,8,1<br>13,14,16 1,12,15 | 3  | P06760,Q4G075,Q6IFU8                                                                                                                        |
| 4472 | 1,3,6,9,10, 2,4,5,7,8,1<br>13,15,16 1,12,14 | 8  | P02091,P06760,P07150,P11883,P22273,P70549,Q00715,Q4G075                                                                                     |
| 4473 | 1,3,6,9,10, 2,4,5,7,8,1<br>14,15,16 1,12,13 | 9  | P01946,P02091,P06760,P22273,P47967,P82471,Q4G075,Q5I0D1,Q8CIZ5                                                                              |
| 4474 | 1,3,6,9,11, 2,4,5,7,8,1<br>12,13,14 0,15,16 | 17 | O70594,O88267,P0DMW0;P0DMW1,P19468,P20646,P20762,P51907,P53790,Q62761;Q62762;Q62763,Q63270,Q63355,Q63424,Q63618,Q64093,Q6TMA8,Q8R431,Q9Z0V6 |
| 4475 | 1,3,6,9,11, 2,4,5,7,8,1<br>12,13,15 0,14,16 | 8  | P02091,P20760,P20762,Q4G075,Q5RLM2,Q62761;Q62762;Q62763,Q6TMA8,Q9WUW8                                                                       |
| 4476 | 1,3,6,9,11, 2,4,5,7,8,1<br>12,13,16 0,14,15 | 4  | P20762,P54921,Q6TMA8,Q9Z1F2                                                                                                                 |
| 4477 | 1,3,6,9,11, 2,4,5,7,8,1<br>12,14,15 0,13,16 | 9  | O55004,P02091,P20762,P25809,P28570,Q62761;Q62762;Q62763,Q63618,Q6TMA8,Q9WUW8                                                                |
| 4478 | 1,3,6,9,11, 2,4,5,7,8,1<br>12,14,16 0,13,15 | 6  | P20762,P25809,Q63618,Q6TMA8,Q8CIZ5,Q9Z0V6                                                                                                   |
| 4479 | 1,3,6,9,11, 2,4,5,7,8,1<br>12,15,16 0,13,14 | 7  | P02091,P20762,P25809,Q4G075,Q6TMA8,Q8CIZ5,Q9WUW8                                                                                            |
| 4480 | 1,3,6,9,11, 2,4,5,7,8,1<br>13,14,15 0,12,16 | 5  | O88267,P02091,P0DMW0;P0DMW1,P20762,Q6TMA8                                                                                                   |
| 4481 | 1,3,6,9,11, 2,4,5,7,8,1<br>13,14,16 0,12,15 | 3  | P0DMW0;P0DMW1,P20762,Q9Z0V6                                                                                                                 |

|      |                                             |                                                                                                      |
|------|---------------------------------------------|------------------------------------------------------------------------------------------------------|
| 4482 | 1,3,6,9,11, 2,4,5,7,8,1<br>13,15,16 0,12,14 | 3 P02091,P20762,Q5RLM2                                                                               |
| 4483 | 1,3,6,9,11, 2,4,5,7,8,1<br>14,15,16 0,12,13 | 4 P02091,P02783,P25809,Q8CIZ5                                                                        |
| 4484 | 1,3,6,9,12, 2,4,5,7,8,1<br>13,14,15 0,11,16 | 11 P02091,P02780,P06760,P07150,P20762,P22273,P70549,Q00715,Q4G075,Q6B345,Q6TMA8                      |
| 4485 | 1,3,6,9,12, 2,4,5,7,8,1<br>13,14,16 0,11,15 | 7 P06760,P20762,P70549,Q4G075,Q6B345,Q6IFU8,Q9Z0V6                                                   |
| 4486 | 1,3,6,9,12, 2,4,5,7,8,1<br>13,15,16 0,11,14 | 7 P02091,P06760,P07150,P20762,P70549,Q4G075,Q6B345                                                   |
| 4487 | 1,3,6,9,12, 2,4,5,7,8,1<br>14,15,16 0,11,13 | 7 P02091,P06760,P22273,P25809,Q4G075,Q6B345,Q8CIZ5                                                   |
| 4488 | 1,3,6,9,13, 2,4,5,7,8,1<br>14,15,16 0,11,12 | 7 P02091,P06760,P22273,P70549,Q00715,Q4G075,Q5I0D1                                                   |
| 4489 | 1,3,6,10,1 2,4,5,7,8,9<br>1,12,13,14 ,15,16 | 6 P06760,P20646,P20760,P20762,Q6TMA8,Q9Z0V6                                                          |
| 4490 | 1,3,6,10,1 2,4,5,7,8,9<br>1,12,13,15 ,14,16 | 6 P02091,P06760,P20646,P20760,P20762,Q6TMA8                                                          |
| 4491 | 1,3,6,10,1 2,4,5,7,8,9<br>1,12,13,16 ,14,15 | 6 P06760,P20646,P20760,P20762,Q6TMA8,Q9Z0V6                                                          |
| 4492 | 1,3,6,10,1 2,4,5,7,8,9<br>1,12,14,15 ,13,16 | 7 D4A5U3,P01946,P02091,P06760,P20760,Q6TMA8,Q9Z0J6                                                   |
| 4493 | 1,3,6,10,1 2,4,5,7,8,9<br>1,12,14,16 ,13,15 | 5 P02783,P06760,P20646,Q6TMA8,Q9Z0V6                                                                 |
| 4494 | 1,3,6,10,1 2,4,5,7,8,9<br>1,12,15,16 ,13,14 | 6 D4A5U3,P02091,P06760,P20760,P25809,Q6TMA8                                                          |
| 4495 | 1,3,6,10,1 2,4,5,7,8,9<br>1,13,14,15 ,12,16 | 5 P01946,P02091,P06760,P20760,Q6TMA8                                                                 |
| 4496 | 1,3,6,10,1 2,4,5,7,8,9<br>1,13,14,16 ,12,15 | 3 P02783,P06760,Q9Z0V6                                                                               |
| 4497 | 1,3,6,10,1 2,4,5,7,8,9<br>1,13,15,16 ,12,14 | 4 P01946,P02091,P06760,P20760                                                                        |
| 4498 | 1,3,6,10,1 2,4,5,7,8,9<br>1,14,15,16 ,12,13 | 4 P01946,P02091,P02783,P06760                                                                        |
| 4499 | 1,3,6,10,1 2,4,5,7,8,9<br>2,13,14,15 ,11,16 | 14 P01946,P02091,P02780,P06760,P07150,P09456,P20646,P20760,P22273,P70549,P82471,Q4G075,Q6TMA8,Q9Z0J6 |
| 4500 | 1,3,6,10,1 2,4,5,7,8,9<br>2,13,14,16 ,11,15 | 7 P06760,P07150,P14668,P20646,P70549,Q4G075,Q9Z0V6                                                   |
| 4501 | 1,3,6,10,1 2,4,5,7,8,9<br>2,13,15,16 ,11,14 | 8 P02091,P06760,P07150,P20760,P70549,P82471,Q4G075,Q6B345                                            |

|      |                                 |    |                                                                              |
|------|---------------------------------|----|------------------------------------------------------------------------------|
| 4502 | 1,3,6,10,1<br>2,14,15,16 ,11,13 | 9  | D4A5U3,P01946,P02091,P02783,P06760,P22273,P82471,P97697,Q4G075               |
| 4503 | 1,3,6,10,1<br>3,14,15,16 ,11,12 | 11 | P01946,P02091,P06760,P07150,P14668,P22273,P70549,P70709,P82471,Q4G075,Q5PQL7 |
| 4504 | 1,3,6,11,1<br>2,13,14,15 ,10,16 | 7  | P02091,P06760,P20646,P20760,P20762,P70545,Q6TMA8                             |
| 4505 | 1,3,6,11,1<br>2,13,14,16 ,10,15 | 5  | P06760,P20646,P20760,P20762,Q9Z0V6                                           |
| 4506 | 1,3,6,11,1<br>2,13,15,16 ,10,14 | 5  | P02091,P06760,P20646,P20760,P20762                                           |
| 4507 | 1,3,6,11,1<br>2,14,15,16 ,10,13 | 5  | P02091,P02783,P06760,P20760,P25809                                           |
| 4508 | 1,3,6,11,1<br>3,14,15,16 ,10,12 | 3  | P02091,P02783,P06760                                                         |
| 4509 | 1,3,6,12,1<br>3,14,15,16 ,10,11 | 9  | P02091,P06760,P07150,P20646,P70545,P70549,Q4G075,Q6B345,Q6P6R2               |
| 4510 | 1,3,7,8,9,1<br>0,11,12 14,15,16 | 2  | P21674,P35280                                                                |
| 4511 | 1,3,7,8,9,1<br>0,11,13 14,15,16 | 1  | P35280                                                                       |
| 4512 | 1,3,7,8,9,1<br>0,11,14 13,15,16 | 1  | P35280                                                                       |
| 4513 | 1,3,7,8,9,1<br>0,11,15 13,14,16 | 4  | P35280,Q5RKI1,Q6IFW6,Q6P6S4                                                  |
| 4514 | 1,3,7,8,9,1<br>0,11,16 13,14,15 | 3  | P21674,P35280,Q812E4                                                         |
| 4515 | 1,3,7,8,9,1<br>0,12,13 14,15,16 | 2  | Q4KLZ6,Q923V8                                                                |
| 4516 | 1,3,7,8,9,1<br>0,12,14 13,15,16 | 2  | O70417,P21674                                                                |
| 4517 | 1,3,7,8,9,1<br>0,12,15 13,14,16 | 3  | P35280,Q4KLZ6,Q5RKI1                                                         |
| 4518 | 1,3,7,8,9,1<br>0,12,16 13,14,15 | 1  | P21674                                                                       |
| 4519 | 1,3,7,8,9,1<br>0,13,14 12,15,16 | 0  |                                                                              |
| 4520 | 1,3,7,8,9,1<br>0,13,15 12,14,16 | 4  | P35280,P70549,Q4KLZ6,Q5RKI1                                                  |
| 4521 | 1,3,7,8,9,1<br>0,13,16 12,14,15 | 0  |                                                                              |

|      |                        |                         |                               |
|------|------------------------|-------------------------|-------------------------------|
| 4522 | 1,3,7,8,9,1<br>0,14,15 | 2,4,5,6,11,<br>12,13,16 | 2 P35280,Q5RKI1               |
| 4523 | 1,3,7,8,9,1<br>0,14,16 | 2,4,5,6,11,<br>12,13,15 | 1 P21674                      |
| 4524 | 1,3,7,8,9,1<br>0,15,16 | 2,4,5,6,11,<br>12,13,14 | 2 P35280,Q5RKI1               |
| 4525 | 1,3,7,8,9,1<br>1,12,13 | 2,4,5,6,10,<br>14,15,16 | 1 P35280                      |
| 4526 | 1,3,7,8,9,1<br>1,12,14 | 2,4,5,6,10,<br>13,15,16 | 4 P11883,P21674,P35280,Q812E4 |
| 4527 | 1,3,7,8,9,1<br>1,12,15 | 2,4,5,6,10,<br>13,14,16 | 2 P35280,Q6IFW6               |
| 4528 | 1,3,7,8,9,1<br>1,12,16 | 2,4,5,6,10,<br>13,14,15 | 4 P21674,P35280,Q812E4,Q9JHB9 |
| 4529 | 1,3,7,8,9,1<br>1,13,14 | 2,4,5,6,10,<br>12,15,16 | 3 P0DMW0;P0DMW1,P35280,Q812E4 |
| 4530 | 1,3,7,8,9,1<br>1,13,15 | 2,4,5,6,10,<br>12,14,16 | 2 P35280,Q6IFW6               |
| 4531 | 1,3,7,8,9,1<br>1,13,16 | 2,4,5,6,10,<br>12,14,15 | 4 P02782,P30120,P35280,Q812E4 |
| 4532 | 1,3,7,8,9,1<br>1,14,15 | 2,4,5,6,10,<br>12,13,16 | 3 P0DMW0;P0DMW1,P35280,Q6IFW6 |
| 4533 | 1,3,7,8,9,1<br>1,14,16 | 2,4,5,6,10,<br>12,13,15 | 3 P21674,P35280,Q812E4        |
| 4534 | 1,3,7,8,9,1<br>1,15,16 | 2,4,5,6,10,<br>12,13,14 | 4 P35280,Q6IFW6,Q812E4,Q8CJ52 |
| 4535 | 1,3,7,8,9,1<br>2,13,14 | 2,4,5,6,10,<br>11,15,16 | 2 P17988,P70549               |
| 4536 | 1,3,7,8,9,1<br>2,13,15 | 2,4,5,6,10,<br>11,14,16 | 3 P35280,P70549,Q4KLZ6        |
| 4537 | 1,3,7,8,9,1<br>2,13,16 | 2,4,5,6,10,<br>11,14,15 | 0                             |
| 4538 | 1,3,7,8,9,1<br>2,14,15 | 2,4,5,6,10,<br>11,13,16 | 1 P35280                      |
| 4539 | 1,3,7,8,9,1<br>2,14,16 | 2,4,5,6,10,<br>11,13,15 | 1 P21674                      |
| 4540 | 1,3,7,8,9,1<br>2,15,16 | 2,4,5,6,10,<br>11,13,14 | 1 P35280                      |
| 4541 | 1,3,7,8,9,1<br>3,14,15 | 2,4,5,6,10,<br>11,12,16 | 3 P0DMW0;P0DMW1,P35280,P70549 |

|      |                         |                         |                                      |
|------|-------------------------|-------------------------|--------------------------------------|
| 4542 | 1,3,7,8,9,1<br>3,14,16  | 2,4,5,6,10,<br>11,12,15 | 0                                    |
| 4543 | 1,3,7,8,9,1<br>3,15,16  | 2,4,5,6,10,<br>11,12,14 | 1 P35280                             |
| 4544 | 1,3,7,8,9,1<br>4,15,16  | 2,4,5,6,10,<br>11,12,13 | 1 P35280                             |
| 4545 | 1,3,7,8,10,<br>11,12,13 | 2,4,5,6,9,1<br>4,15,16  | 2 P47967,Q5I0D1                      |
| 4546 | 1,3,7,8,10,<br>11,12,14 | 2,4,5,6,9,1<br>3,15,16  | 1 P11883                             |
| 4547 | 1,3,7,8,10,<br>11,12,15 | 2,4,5,6,9,1<br>3,14,16  | 2 Q5RKI1,Q6IFW6                      |
| 4548 | 1,3,7,8,10,<br>11,12,16 | 2,4,5,6,9,1<br>3,14,15  | 3 P08010,P21674,Q9JHB9               |
| 4549 | 1,3,7,8,10,<br>11,13,14 | 2,4,5,6,9,1<br>2,15,16  | 0                                    |
| 4550 | 1,3,7,8,10,<br>11,13,15 | 2,4,5,6,9,1<br>2,14,16  | 2 Q5RKI1,Q6IFW6                      |
| 4551 | 1,3,7,8,10,<br>11,13,16 | 2,4,5,6,9,1<br>2,14,15  | 2 P02782,P30120                      |
| 4552 | 1,3,7,8,10,<br>11,14,15 | 2,4,5,6,9,1<br>2,13,16  | 2 Q5RKI1,Q6IFW6                      |
| 4553 | 1,3,7,8,10,<br>11,14,16 | 2,4,5,6,9,1<br>2,13,15  | 0                                    |
| 4554 | 1,3,7,8,10,<br>11,15,16 | 2,4,5,6,9,1<br>2,13,14  | 4 Q5RKI1,Q64093,Q6IFW6,Q9WTW7        |
| 4555 | 1,3,7,8,10,<br>12,13,14 | 2,4,5,6,9,1<br>1,15,16  | 1 P70549                             |
| 4556 | 1,3,7,8,10,<br>12,13,15 | 2,4,5,6,9,1<br>1,14,16  | 3 P70549,Q4KLZ6,Q5RKI1               |
| 4557 | 1,3,7,8,10,<br>12,13,16 | 2,4,5,6,9,1<br>1,14,15  | 2 Q64093,Q923V8                      |
| 4558 | 1,3,7,8,10,<br>12,14,15 | 2,4,5,6,9,1<br>1,13,16  | 3 Q5RKI1,Q9EQS0,Q9Z0J6               |
| 4559 | 1,3,7,8,10,<br>12,14,16 | 2,4,5,6,9,1<br>1,13,15  | 1 P21674                             |
| 4560 | 1,3,7,8,10,<br>12,15,16 | 2,4,5,6,9,1<br>1,13,14  | 5 Q5RKI1,Q63598,Q64093,Q6AY41,Q9WTW7 |
| 4561 | 1,3,7,8,10,<br>13,14,15 | 2,4,5,6,9,1<br>1,12,16  | 3 P70549,Q03191,Q5RKI1               |

|      |                                             |                                                           |
|------|---------------------------------------------|-----------------------------------------------------------|
| 4562 | 1,3,7,8,10, 2,4,5,6,9,1<br>13,14,16 1,12,15 | 1 O35077                                                  |
| 4563 | 1,3,7,8,10, 2,4,5,6,9,1<br>13,15,16 1,12,14 | 8 O35077,P19468,P70549,Q5RKI1,Q63424,Q64093,Q6AY41,Q9WTW7 |
| 4564 | 1,3,7,8,10, 2,4,5,6,9,1<br>14,15,16 1,12,13 | 6 O35077,P61206,P84079,P97608,Q03191,Q5RKI1,Q64093        |
| 4565 | 1,3,7,8,11, 2,4,5,6,9,1<br>12,13,14 0,15,16 | 3 D3ZUC6,P11883,Q811M5                                    |
| 4566 | 1,3,7,8,11, 2,4,5,6,9,1<br>12,13,15 0,14,16 | 2 Q6IFW6,Q811M5                                           |
| 4567 | 1,3,7,8,11, 2,4,5,6,9,1<br>12,13,16 0,14,15 | 6 P02782,P08723,P30120,P47967,Q811M5,Q9JHB9               |
| 4568 | 1,3,7,8,11, 2,4,5,6,9,1<br>12,14,15 0,13,16 | 5 D3ZTX0,D3ZUC6,P11883,Q6IFW6,Q811M5                      |
| 4569 | 1,3,7,8,11, 2,4,5,6,9,1<br>12,14,16 0,13,15 | 7 D3ZTX0,P02782,P11883,P21674,P30120,Q811M5,Q9JHB9        |
| 4570 | 1,3,7,8,11, 2,4,5,6,9,1<br>12,15,16 0,13,14 | 2 Q6IFW6,Q9QW07                                           |
| 4571 | 1,3,7,8,11, 2,4,5,6,9,1<br>13,14,15 0,12,16 | 3 D3ZUC6,Q6IFW6,Q811M5                                    |
| 4572 | 1,3,7,8,11, 2,4,5,6,9,1<br>13,14,16 0,12,15 | 3 P02782,P30120,Q811M5                                    |
| 4573 | 1,3,7,8,11, 2,4,5,6,9,1<br>13,15,16 0,12,14 | 4 P02782,P16636,P30120,Q6IFW6                             |
| 4574 | 1,3,7,8,11, 2,4,5,6,9,1<br>14,15,16 0,12,13 | 3 D3ZTX0,Q6IFW6,Q9QZK9                                    |
| 4575 | 1,3,7,8,12, 2,4,5,6,9,1<br>13,14,15 0,11,16 | 4 D3ZUC6,P70549,Q811M5,Q9Z2L0                             |
| 4576 | 1,3,7,8,12, 2,4,5,6,9,1<br>13,14,16 0,11,15 | 3 P70549,Q811M5,Q9Z2L0                                    |
| 4577 | 1,3,7,8,12, 2,4,5,6,9,1<br>13,15,16 0,11,14 | 1 P70549                                                  |
| 4578 | 1,3,7,8,12, 2,4,5,6,9,1<br>14,15,16 0,11,13 | 0                                                         |
| 4579 | 1,3,7,8,13, 2,4,5,6,9,1<br>14,15,16 0,11,12 | 5 O35077,P70549,Q03191,Q62714,Q9Z2L0                      |
| 4580 | 1,3,7,9,10, 2,4,5,6,8,1<br>11,12,13 4,15,16 | 3 P20760,P20762,Q62761;Q62762;Q62763                      |
| 4581 | 1,3,7,9,10, 2,4,5,6,8,1<br>11,12,14 3,15,16 | 1 Q62761;Q62762;Q62763                                    |



|      |                                             |                                                                                |
|------|---------------------------------------------|--------------------------------------------------------------------------------|
| 4582 | 1,3,7,9,10, 2,4,5,6,8,1<br>11,12,15 3,14,16 | 4 P20760,P52590,Q5RKI1,Q62761;Q62762;Q62763                                    |
| 4583 | 1,3,7,9,10, 2,4,5,6,8,1<br>11,12,16 3,14,15 | 1 P21674                                                                       |
| 4584 | 1,3,7,9,10, 2,4,5,6,8,1<br>11,13,14 2,15,16 | 1 P0DMW0;P0DMW1                                                                |
| 4585 | 1,3,7,9,10, 2,4,5,6,8,1<br>11,13,15 2,14,16 | 2 P20760,Q5RKI1                                                                |
| 4586 | 1,3,7,9,10, 2,4,5,6,8,1<br>11,13,16 2,14,15 | 0                                                                              |
| 4587 | 1,3,7,9,10, 2,4,5,6,8,1<br>11,14,15 2,13,16 | 1 Q5RKI1                                                                       |
| 4588 | 1,3,7,9,10, 2,4,5,6,8,1<br>11,14,16 2,13,15 | 0                                                                              |
| 4589 | 1,3,7,9,10, 2,4,5,6,8,1<br>11,15,16 2,13,14 | 1 Q5RKI1                                                                       |
| 4590 | 1,3,7,9,10, 2,4,5,6,8,1<br>12,13,14 1,15,16 | 1 P50280                                                                       |
| 4591 | 1,3,7,9,10, 2,4,5,6,8,1<br>12,13,15 1,14,16 | 5 P20760,P50280,P70549,Q4KLZ6,Q5RKI1                                           |
| 4592 | 1,3,7,9,10, 2,4,5,6,8,1<br>12,13,16 1,14,15 | 1 P50280                                                                       |
| 4593 | 1,3,7,9,10, 2,4,5,6,8,1<br>12,14,15 1,13,16 | 4 P22273,P30120,Q5RKI1,Q9Z0J6                                                  |
| 4594 | 1,3,7,9,10, 2,4,5,6,8,1<br>12,14,16 1,13,15 | 1 P21674                                                                       |
| 4595 | 1,3,7,9,10, 2,4,5,6,8,1<br>12,15,16 1,13,14 | 1 Q5RKI1                                                                       |
| 4596 | 1,3,7,9,10, 2,4,5,6,8,1<br>13,14,15 1,12,16 | 5 P02780,P12020,P22273,Q00715,Q5RKI1                                           |
| 4597 | 1,3,7,9,10, 2,4,5,6,8,1<br>13,14,16 1,12,15 | 0                                                                              |
| 4598 | 1,3,7,9,10, 2,4,5,6,8,1<br>13,15,16 1,12,14 | 2 P12020,Q5RKI1                                                                |
| 4599 | 1,3,7,9,10, 2,4,5,6,8,1<br>14,15,16 1,12,13 | 2 P22273,Q5RKI1                                                                |
| 4600 | 1,3,7,9,11, 2,4,5,6,8,1<br>12,13,14 0,15,16 | 8 O55004,O88267,P07151,P0DMW0;P0DMW1,P20760,P20762,P25031,Q62761;Q62762;Q62763 |
| 4601 | 1,3,7,9,11, 2,4,5,6,8,1<br>12,13,15 0,14,16 | 4 P20760,P20762,P25031,Q62761;Q62762;Q62763                                    |

|      |                                             |                                                                         |
|------|---------------------------------------------|-------------------------------------------------------------------------|
| 4602 | 1,3,7,9,11, 2,4,5,6,8,1<br>12,13,16 0,14,15 | 3 P20760,P20762,P54921                                                  |
| 4603 | 1,3,7,9,11, 2,4,5,6,8,1<br>12,14,15 0,13,16 | 8 O55004,P02631,P07151,P20760,P20762,P25031,Q62761;Q62762;Q62763,Q63618 |
| 4604 | 1,3,7,9,11, 2,4,5,6,8,1<br>12,14,16 0,13,15 | 5 P21674,P25031,P36860,Q498D9,Q63618                                    |
| 4605 | 1,3,7,9,11, 2,4,5,6,8,1<br>12,15,16 0,13,14 | 3 P20760,P25031,P25809                                                  |
| 4606 | 1,3,7,9,11, 2,4,5,6,8,1<br>13,14,15 0,12,16 | 6 O88267,P02631,P0DMW0;P0DMW1,P20760,P20762,P25031                      |
| 4607 | 1,3,7,9,11, 2,4,5,6,8,1<br>13,14,16 0,12,15 | 5 O88267,P0DMW0;P0DMW1,P20762,P25031,Q498D9                             |
| 4608 | 1,3,7,9,11, 2,4,5,6,8,1<br>13,15,16 0,12,14 | 4 P20760,P20762,P25031,Q5RLM2                                           |
| 4609 | 1,3,7,9,11, 2,4,5,6,8,1<br>14,15,16 0,12,13 | 3 P02631,P0DMW0;P0DMW1,P25031                                           |
| 4610 | 1,3,7,9,12, 2,4,5,6,8,1<br>13,14,15 0,11,16 | 5 P20760,P20762,P22273,P25031,P70549                                    |
| 4611 | 1,3,7,9,12, 2,4,5,6,8,1<br>13,14,16 0,11,15 | 1 P20762                                                                |
| 4612 | 1,3,7,9,12, 2,4,5,6,8,1<br>13,15,16 0,11,14 | 1 Q6B345                                                                |
| 4613 | 1,3,7,9,12, 2,4,5,6,8,1<br>14,15,16 0,11,13 | 1 P22273                                                                |
| 4614 | 1,3,7,9,13, 2,4,5,6,8,1<br>14,15,16 0,11,12 | 1 P25031                                                                |
| 4615 | 1,3,7,10,1 2,4,5,6,8,9<br>1,12,13,14 ,15,16 | 2 P20760,P23593                                                         |
| 4616 | 1,3,7,10,1 2,4,5,6,8,9<br>1,12,13,15 ,14,16 | 3 P20760,P23593,Q5RKI1                                                  |
| 4617 | 1,3,7,10,1 2,4,5,6,8,9<br>1,12,13,16 ,14,15 | 3 P20760,P47967,P97840                                                  |
| 4618 | 1,3,7,10,1 2,4,5,6,8,9<br>1,12,14,15 ,13,16 | 3 P20760,Q5RKI1,Q9Z0J6                                                  |
| 4619 | 1,3,7,10,1 2,4,5,6,8,9<br>1,12,14,16 ,13,15 | 1 P20760                                                                |
| 4620 | 1,3,7,10,1 2,4,5,6,8,9<br>1,12,15,16 ,13,14 | 2 P20760,Q5RKI1                                                         |
| 4621 | 1,3,7,10,1 2,4,5,6,8,9<br>1,13,14,15 ,12,16 | 2 P20760,Q5RKI1                                                         |

|      |                          |                        |   |                                                         |
|------|--------------------------|------------------------|---|---------------------------------------------------------|
| 4622 | 1,3,7,10,1<br>1,13,14,16 | 2,4,5,6,8,9<br>,12,15  | 1 | P36376                                                  |
| 4623 | 1,3,7,10,1<br>1,13,15,16 | 2,4,5,6,8,9<br>,12,14  | 2 | P20760,Q5RKI1                                           |
| 4624 | 1,3,7,10,1<br>1,14,15,16 | 2,4,5,6,8,9<br>,12,13  | 2 | P20760,Q5RKI1                                           |
| 4625 | 1,3,7,10,1<br>2,13,14,15 | 2,4,5,6,8,9<br>,11,16  | 4 | P20760,P70549,Q5RKI1,Q9Z0J6                             |
| 4626 | 1,3,7,10,1<br>2,13,14,16 | 2,4,5,6,8,9<br>,11,15  | 0 |                                                         |
| 4627 | 1,3,7,10,1<br>2,13,15,16 | 2,4,5,6,8,9<br>,11,14  | 3 | P20760,P70549,Q5RKI1                                    |
| 4628 | 1,3,7,10,1<br>2,14,15,16 | 2,4,5,6,8,9<br>,11,13  | 1 | Q5RKI1                                                  |
| 4629 | 1,3,7,10,1<br>3,14,15,16 | 2,4,5,6,8,9<br>,11,12  | 4 | P61206,P84079,P63095,P70549,Q5RKI1                      |
| 4630 | 1,3,7,11,1<br>2,13,14,15 | 2,4,5,6,8,9<br>,10,16  | 8 | D3ZTX0,P02454,P17559,P20760,P20762,P25031,P70545,Q811M5 |
| 4631 | 1,3,7,11,1<br>2,13,14,16 | 2,4,5,6,8,9<br>,10,15  | 7 | D3ZTX0,P02454,P17559,P20760,P20762,P25031,Q811M5        |
| 4632 | 1,3,7,11,1<br>2,13,15,16 | 2,4,5,6,8,9<br>,10,14  | 5 | P02454,P17559,P20760,P20762,P25031                      |
| 4633 | 1,3,7,11,1<br>2,14,15,16 | 2,4,5,6,8,9<br>,10,13  | 6 | D3ZTX0,P02454,P02631,P17559,P20760,P25031               |
| 4634 | 1,3,7,11,1<br>3,14,15,16 | 2,4,5,6,8,9<br>,10,12  | 5 | D3ZTX0,P02454,P17559,P20760,P25031                      |
| 4635 | 1,3,7,12,1<br>3,14,15,16 | 2,4,5,6,8,9<br>,10,11  | 7 | P02454,P17559,P20760,P25031,P70545,P70549,Q6B345        |
| 4636 | 1,3,8,9,10,<br>11,12,13  | 2,4,5,6,7,1<br>4,15,16 | 3 | B0LT89,P17988,P50116                                    |
| 4637 | 1,3,8,9,10,<br>11,12,14  | 2,4,5,6,7,1<br>3,15,16 | 3 | P21674,P50116,Q9Z0J6                                    |
| 4638 | 1,3,8,9,10,<br>11,12,15  | 2,4,5,6,7,1<br>3,14,16 | 2 | P50116,P52590                                           |
| 4639 | 1,3,8,9,10,<br>11,12,16  | 2,4,5,6,7,1<br>3,14,15 | 4 | A2RUW1,O88797,P21674,P50116                             |
| 4640 | 1,3,8,9,10,<br>11,13,14  | 2,4,5,6,7,1<br>2,15,16 | 2 | P17988,P50116                                           |
| 4641 | 1,3,8,9,10,<br>11,13,15  | 2,4,5,6,7,1<br>2,14,16 | 2 | P50116,Q80WL1                                           |

|      |                                             |                                                                          |
|------|---------------------------------------------|--------------------------------------------------------------------------|
| 4642 | 1,3,8,9,10, 2,4,5,6,7,1<br>11,13,16 2,14,15 | 2 P50116,Q80WL1                                                          |
| 4643 | 1,3,8,9,10, 2,4,5,6,7,1<br>11,14,15 2,13,16 | 2 P50116,Q9Z0J6                                                          |
| 4644 | 1,3,8,9,10, 2,4,5,6,7,1<br>11,14,16 2,13,15 | 3 O88797,P36860,P50116                                                   |
| 4645 | 1,3,8,9,10, 2,4,5,6,7,1<br>11,15,16 2,13,14 | 2 P50116,Q6IFW6                                                          |
| 4646 | 1,3,8,9,10, 2,4,5,6,7,1<br>12,13,14 1,15,16 | 5 P01039,P11598,P17988,P50116,Q9Z0J6                                     |
| 4647 | 1,3,8,9,10, 2,4,5,6,7,1<br>12,13,15 1,14,16 | 7 P01039,P07647,P11598,P50116,P70549,Q4KLZ6,Q99041                       |
| 4648 | 1,3,8,9,10, 2,4,5,6,7,1<br>12,13,16 1,14,15 | 2 P01039,P50116                                                          |
| 4649 | 1,3,8,9,10, 2,4,5,6,7,1<br>12,14,15 1,13,16 | 6 P00714,P01039,P07647,P11598,P50116,Q9Z0J6                              |
| 4650 | 1,3,8,9,10, 2,4,5,6,7,1<br>12,14,16 1,13,15 | 3 P01039,P21674,P50116                                                   |
| 4651 | 1,3,8,9,10, 2,4,5,6,7,1<br>12,15,16 1,13,14 | 4 P01039,P11598,P50116,Q99041                                            |
| 4652 | 1,3,8,9,10, 2,4,5,6,7,1<br>13,14,15 1,12,16 | 8 P01039,P02780,P07647,P11598,P50116,P70549,Q00715,Q9Z0J6                |
| 4653 | 1,3,8,9,10, 2,4,5,6,7,1<br>13,14,16 1,12,15 | 2 P01039,P50116                                                          |
| 4654 | 1,3,8,9,10, 2,4,5,6,7,1<br>13,15,16 1,12,14 | 3 P01039,P50116,Q80WL1                                                   |
| 4655 | 1,3,8,9,10, 2,4,5,6,7,1<br>14,15,16 1,12,13 | 5 P01039,P11598,P47967,P50116,Q5I0D1                                     |
| 4656 | 1,3,8,9,11, 2,4,5,6,7,1<br>12,13,14 0,15,16 | 10 B0LT89,O70594,P09527,P17988,P18297,P50116,Q03248,Q5I0E9,Q63270,Q64335 |
| 4657 | 1,3,8,9,11, 2,4,5,6,7,1<br>12,13,15 0,14,16 | 4 B0LT89,P09527,P50116,Q80WL1                                            |
| 4658 | 1,3,8,9,11, 2,4,5,6,7,1<br>12,13,16 0,14,15 | 6 A2RUW1,O88797,P09527,P50116,P54921,Q80WL1                              |
| 4659 | 1,3,8,9,11, 2,4,5,6,7,1<br>12,14,15 0,13,16 | 5 P09527,P50116,P80299,Q63618,Q9Z0J6                                     |
| 4660 | 1,3,8,9,11, 2,4,5,6,7,1<br>12,14,16 0,13,15 | 7 A2RUW1,O88797,P21674,P36860,P50116,P80299,Q63618                       |
| 4661 | 1,3,8,9,11, 2,4,5,6,7,1<br>12,15,16 0,13,14 | 5 A2RUW1,O88797,P50116,P80299,Q6IFW6                                     |

|      |                                             |                                                    |
|------|---------------------------------------------|----------------------------------------------------|
| 4662 | 1,3,8,9,11, 2,4,5,6,7,1<br>13,14,15 0,12,16 | 3 P0DMW0;P0DMW1,P36970,P50116                      |
| 4663 | 1,3,8,9,11, 2,4,5,6,7,1<br>13,14,16 0,12,15 | 3 P0DMW0;P0DMW1,P36860,P50116                      |
| 4664 | 1,3,8,9,11, 2,4,5,6,7,1<br>13,15,16 0,12,14 | 3 P50116,Q5RLM2,Q80WL1                             |
| 4665 | 1,3,8,9,11, 2,4,5,6,7,1<br>14,15,16 0,12,13 | 3 P36860,P50116,P80299                             |
| 4666 | 1,3,8,9,12, 2,4,5,6,7,1<br>13,14,15 0,11,16 | 7 P01039,P07647,P11598,P17988,P50116,P70549,Q9Z0J6 |
| 4667 | 1,3,8,9,12, 2,4,5,6,7,1<br>13,14,16 0,11,15 | 3 P01039,P17988,P50116                             |
| 4668 | 1,3,8,9,12, 2,4,5,6,7,1<br>13,15,16 0,11,14 | 3 P01039,P50116,Q80WL1                             |
| 4669 | 1,3,8,9,12, 2,4,5,6,7,1<br>14,15,16 0,11,13 | 5 P01039,P11598,P36860,P50116,P80299               |
| 4670 | 1,3,8,9,13, 2,4,5,6,7,1<br>14,15,16 0,11,12 | 2 P01039,P50116                                    |
| 4671 | 1,3,8,10,1 2,4,5,6,7,9<br>1,12,13,14 ,15,16 | 2 P50116,Q9Z0J6                                    |
| 4672 | 1,3,8,10,1 2,4,5,6,7,9<br>1,12,13,15 ,14,16 | 3 P50116,P52590,Q6IFW6                             |
| 4673 | 1,3,8,10,1 2,4,5,6,7,9<br>1,12,13,16 ,14,15 | 1 P50116                                           |
| 4674 | 1,3,8,10,1 2,4,5,6,7,9<br>1,12,14,15 ,13,16 | 4 P50116,Q6IFW6,Q9EQS0,Q9Z0J6                      |
| 4675 | 1,3,8,10,1 2,4,5,6,7,9<br>1,12,14,16 ,13,15 | 2 P36860,P50116                                    |
| 4676 | 1,3,8,10,1 2,4,5,6,7,9<br>1,12,15,16 ,13,14 | 2 P50116,Q6IFW6                                    |
| 4677 | 1,3,8,10,1 2,4,5,6,7,9<br>1,13,14,15 ,12,16 | 2 P50116,Q9Z0J6                                    |
| 4678 | 1,3,8,10,1 2,4,5,6,7,9<br>1,13,14,16 ,12,15 | 1 P50116                                           |
| 4679 | 1,3,8,10,1 2,4,5,6,7,9<br>1,13,15,16 ,12,14 | 3 P50116,Q6IFW6,Q80WL1                             |
| 4680 | 1,3,8,10,1 2,4,5,6,7,9<br>1,14,15,16 ,12,13 | 3 P50116,P80299,Q6IFW6                             |
| 4681 | 1,3,8,10,1 2,4,5,6,7,9<br>2,13,14,15 ,11,16 | 5 P01039,P11598,P50116,P70549,Q9Z0J6               |

|      |                                             |    |                                                                                                                                                                                                             |
|------|---------------------------------------------|----|-------------------------------------------------------------------------------------------------------------------------------------------------------------------------------------------------------------|
| 4682 | 1,3,8,10,1 2,4,5,6,7,9<br>2,13,14,16 ,11,15 | 2  | P50116,Q9Z0J6                                                                                                                                                                                               |
| 4683 | 1,3,8,10,1 2,4,5,6,7,9<br>2,13,15,16 ,11,14 | 3  | P01039,P50116,P70549                                                                                                                                                                                        |
| 4684 | 1,3,8,10,1 2,4,5,6,7,9<br>2,14,15,16 ,11,13 | 4  | P01039,P50116,Q63617,Q9Z0J6                                                                                                                                                                                 |
| 4685 | 1,3,8,10,1 2,4,5,6,7,9<br>3,14,15,16 ,11,12 | 4  | O35077,P50116,P70549,Q03191                                                                                                                                                                                 |
| 4686 | 1,3,8,11,1 2,4,5,6,7,9<br>2,13,14,15 ,10,16 | 6  | D3ZTX0,P50116,P70545,Q811M5,Q9WVH8,Q9Z0J6                                                                                                                                                                   |
| 4687 | 1,3,8,11,1 2,4,5,6,7,9<br>2,13,14,16 ,10,15 | 5  | D3ZTX0,P00762,P36860,P50116,Q811M5                                                                                                                                                                          |
| 4688 | 1,3,8,11,1 2,4,5,6,7,9<br>2,13,15,16 ,10,14 | 4  | P00762,P50116,Q6IFW6,Q80WL1                                                                                                                                                                                 |
| 4689 | 1,3,8,11,1 2,4,5,6,7,9<br>2,14,15,16 ,10,13 | 6  | D3ZTX0,P36860,P50116,P80299,Q6IFW6,Q9WVH8                                                                                                                                                                   |
| 4690 | 1,3,8,11,1 2,4,5,6,7,9<br>3,14,15,16 ,10,12 | 4  | D3ZTX0,P36860,P50116,Q6IFW6                                                                                                                                                                                 |
| 4691 | 1,3,8,12,1 2,4,5,6,7,9<br>3,14,15,16 ,10,11 | 2  | P50116,P70549                                                                                                                                                                                               |
| 4692 | 1,3,9,10,1 2,4,5,6,7,8<br>1,12,13,14 ,15,16 | 26 | B0LT89,O55004,O70594,O88267,P06761,P07151,P17988,P20673,P20760,P20761,P20762,P4850<br>8,P50115,P50116,P50280,P55091,P98089,Q4G075,Q5M7T9,Q62761;Q62762;Q62763,Q63270,Q<br>6PCU2,Q6TMA8,Q9QX74,Q9Z0J6,Q9Z0V6 |
| 4693 | 1,3,9,10,1 2,4,5,6,7,8<br>1,12,13,15 ,14,16 | 21 | B0LT89,D3ZHA0,D4A5U3,P06760,P06761,P20760,P20761,P20762,P50115,P50116,P50280,P525<br>90,P55091,P98089,Q4G075,Q62635,Q62761;Q62762;Q62763,Q6TMA8,Q8CIZ5,Q9QX74,Q9WU<br>W8                                    |
| 4694 | 1,3,9,10,1 2,4,5,6,7,8<br>1,12,13,16 ,14,15 | 16 | B0LT89,P06760,P20760,P20761,P20762,P50115,P50116,P54921,P55091,P98089,Q4G075,Q6263<br>5,Q6PCU2,Q6TMA8,Q8CIZ5,Q9QX74                                                                                         |
| 4695 | 1,3,9,10,1 2,4,5,6,7,8<br>1,12,14,15 ,13,16 | 23 | D3ZHA0,D4A5U3,O55004,O70257,P02631,P02781,P06761,P07151,P20760,P20761,P20762,P50<br>115,P50116,P55091,P98089,Q4G075,Q62761;Q62762;Q62763,Q6TMA8,Q8CIZ5,Q9QX74,Q9R0<br>T3,Q9WUW8,Q9Z0J6                      |
| 4696 | 1,3,9,10,1 2,4,5,6,7,8<br>1,12,14,16 ,13,15 | 19 | O55004,P02631,P07171,P20760,P20761,P20762,P21674,P36860,P50115,P50116,P55091,P9808<br>9,Q4G075,Q63618,Q6PCU2,Q6TMA8,Q8CIZ5,Q9QX74,Q9Z0V6                                                                    |
| 4697 | 1,3,9,10,1 2,4,5,6,7,8<br>1,12,15,16 ,13,14 | 22 | D3ZHA0,D4A5U3,P02631,P06760,P06761,P07171,P20760,P20761,P20762,P25809,P50115,P501<br>16,P55091,P98089,Q4G075,Q5QE79,Q62635,Q6PCU2,Q6TMA8,Q8CIZ5,Q9QX74,Q9WUW8                                               |
| 4698 | 1,3,9,10,1 2,4,5,6,7,8<br>1,13,14,15 ,12,16 | 18 | O88267,P02631,P02780,P06761,P0DMW0;P0DMW1,P20760,P20761,P20762,P50115,P50116,P5<br>5091,P98089,Q4G075,Q6TMA8,Q8CIZ5,Q9QX74,Q9R0T3,Q9Z0J6                                                                    |
| 4699 | 1,3,9,10,1 2,4,5,6,7,8<br>1,13,14,16 ,12,15 | 10 | P20762,P50115,P50116,P55091,P98089,Q4G075,Q6TMA8,Q8CIZ5,Q9QX74,Q9Z0V6                                                                                                                                       |
| 4700 | 1,3,9,10,1 2,4,5,6,7,8<br>1,13,15,16 ,12,14 | 16 | D3ZHA0,P02631,P06760,P06761,P20760,P20762,P50115,P50116,P55091,P98089,Q4G075,Q5RL<br>M2,Q62635,Q6TMA8,Q8CIZ5,Q9QX74                                                                                         |

|      |                          |                       |    |                                                                                                                                                                                                                                                                                                                                                                                                         |
|------|--------------------------|-----------------------|----|---------------------------------------------------------------------------------------------------------------------------------------------------------------------------------------------------------------------------------------------------------------------------------------------------------------------------------------------------------------------------------------------------------|
| 4701 | 1,3,9,10,1<br>1,14,15,16 | 2,4,5,6,7,8<br>,12,13 | 14 | D4A5U3,P02631,P06761,P07171,P25809,P36860,P50115,P50116,P55091,P98089,Q4G075,Q6TMA8,Q8CIZ5,Q9ROT3                                                                                                                                                                                                                                                                                                       |
| 4702 | 1,3,9,10,1<br>2,13,14,15 | 2,4,5,6,7,8<br>,11,16 | 44 | D4A5U3,P01039,P02780,P02781,P02782,P04905,P06760,P06761,P07150,P07647,P08723,P09456,P0C0A9,P11598,P12020,P20673,P20760,P20761,P20762,P22273,P22282,P22283,P30120,P31430,P36374,P46462,P50115,P50116,P50280,P55091,P70549,P98089,Q00715,Q4G063,Q4G075,Q5M8C6,Q63617,Q6TMA8,Q8CIZ5,Q99041,Q9JHB9,Q9QX74,Q9ROT3,Q9Z0J6                                                                                     |
| 4703 | 1,3,9,10,1<br>2,13,14,16 | 2,4,5,6,7,8<br>,11,15 | 28 | P01039,P02780,P06760,P06761,P07150,P11598,P20762,P22273,P22282,P31430,P46462,P50115,P50116,P50280,P55091,P98089,Q4G063,Q4G075,Q63617,Q6IFU8,Q6TMA8,Q8CIZ5,Q8CJ52,Q99041,Q9QX74,Q9ROT3,Q9WTT6,Q9Z0V6                                                                                                                                                                                                     |
| 4704 | 1,3,9,10,1<br>2,13,15,16 | 2,4,5,6,7,8<br>,11,14 | 32 | D4A5U3,P01039,P02780,P06760,P06761,P07150,P11598,P12020,P20760,P20762,P22273,P22282,P31430,P46462,P50115,P50116,P50280,P55091,P98089,Q4G063,Q4G075,Q5GRG2,Q5M8C6,Q5QE79,Q62635,Q63617,Q6B345,Q6TMA8,Q8CIZ5,Q99041,Q9QX74,Q9ROT3                                                                                                                                                                         |
| 4705 | 1,3,9,10,1<br>2,14,15,16 | 2,4,5,6,7,8<br>,11,13 | 34 | D4A5U3,P01039,P02631,P02780,P02781,P06760,P06761,P07150,P07171,P09456,P11598,P12020,P22273,P22282,P22283,P25809,P31430,P46462,P50115,P50116,P50280,P55091,P98089,Q4G063,Q4G075,Q5M8C6,Q63617,Q6TMA8,Q8CIZ5,Q99041,Q9QX74,Q9ROT3,Q9WTT6,Q9Z0J6                                                                                                                                                           |
| 4706 | 1,3,9,10,1<br>3,14,15,16 | 2,4,5,6,7,8<br>,11,12 | 32 | P01039,P02631,P02780,P02781,P06760,P06761,P06911,P07150,P11598,P12020,P22273,P22282,P22283,P31430,P36374,P46462,P50115,P50116,P50280,P55091,P70709,P98089,Q00715,Q4G075,Q5GRG2,Q5M8C6,Q62635,Q63617,Q6TMA8,Q8CIZ5,Q9QX74,Q9ROT3                                                                                                                                                                         |
| 4707 | 1,3,9,11,1<br>2,13,14,15 | 2,4,5,6,7,8<br>,10,16 | 53 | B0LT89,O55004,O70257,O70594,O88267,P02454,P02631,P06761,P07151,P0DMW0,P0DMW1,P18418,P18757,P19468,P20760,P20761,P20762,P25031,P28570,P36970,P46844,P48508,P50115,P50116,P51907,P53790,P55091,P57113,P98089,Q03248,Q05175,Q3ZAV1,Q4G075,Q5I0E9,Q5M7T9,Q62761,Q62762,Q62763,Q63270,Q63424,Q63618,Q64602,Q68FT5,Q6MG61,Q6Q0N1,Q6TMA8,Q71MB6,Q8CIZ5,Q8R431,Q923S2,Q99MA2,Q9JJ40,Q9QX74,Q9ROT3,Q9Z0J6,Q9Z0W7 |
| 4708 | 1,3,9,11,1<br>2,13,14,16 | 2,4,5,6,7,8<br>,10,15 | 40 | A2RUW1,O08557,O55004,O70594,O88267,O88339,Q4V882,P02454,P02631,P20760,P20761,P20762,P25031,P30904,P36860,P38918,P48508,P50115,P50116,P51907,P53790,P54921,P55091,P98089,Q03248,Q05175,Q3ZAV1,Q4G075,Q5I0E9,Q5M7T9,Q63270,Q63618,Q6MG61,Q6PCU2,Q6Q0N1,Q6TMA8,Q8CIZ5,Q8R431,Q923S2,Q9QX74,Q9Z0V6                                                                                                          |
| 4709 | 1,3,9,11,1<br>2,13,15,16 | 2,4,5,6,7,8<br>,10,14 | 30 | D3ZHA0,D4A5U3,O55004,O70594,P02454,P02631,P06760,P07171,P20760,P20761,P20762,P25031,P25809,P48508,P50115,P50116,P54921,P55091,P98089,Q4G075,Q5QE79,Q5RLM2,Q62635,Q63618,Q6PCU2,Q6TMA8,Q8CIZ5,Q923S2,Q9QX74,Q9WUW8                                                                                                                                                                                       |
| 4710 | 1,3,9,11,1<br>2,14,15,16 | 2,4,5,6,7,8<br>,10,13 | 29 | A2RUW1,D4A5U3,O55004,O70257,O70594,P02454,P02631,P06761,P07171,P20760,P20762,P25031,P25809,P30904,P36860,P50115,P50116,P51907,P55091,P80299,P98089,Q4G075,Q63618,Q6PCU2,Q6TMA8,Q8CIZ5,Q9QX74,Q9ROT3,Q9WUW8                                                                                                                                                                                              |
| 4711 | 1,3,9,11,1<br>3,14,15,16 | 2,4,5,6,7,8<br>,10,12 | 23 | O55004,O88267,P02454,P02631,P0DMW0,P0DMW1,P20760,P20762,P25031,P30904,P36860,P38438,P48508,P50115,P50116,P55091,P98089,Q5RLM2,Q63270,Q63618,Q6TMA8,Q8CIZ5,Q9QX74,Q9ROT3                                                                                                                                                                                                                                 |
| 4712 | 1,3,9,12,1<br>3,14,15,16 | 2,4,5,6,7,8<br>,10,11 | 30 | O55004,P01039,P02454,P02631,P02780,P06760,P06761,P07150,P11598,P20760,P20762,P22273,P22282,P25031,P31430,P50115,P50116,P50280,P55091,P98089,Q4G063,Q4G075,Q5M8C6,Q63617,Q6B345,Q6TMA8,Q8CIZ5,Q99041,Q9QX74,Q9ROT3                                                                                                                                                                                       |

|      |                               |                               |    |                                                                                                                                                                                                                                                                                                                                                               |
|------|-------------------------------|-------------------------------|----|---------------------------------------------------------------------------------------------------------------------------------------------------------------------------------------------------------------------------------------------------------------------------------------------------------------------------------------------------------------|
| 4713 | 1,3,10,11,<br>12,13,14,1<br>5 | 2,4,5,6,7,8<br>,9,16          | 17 | D3ZHA0,D4A5U3,P06760,P06761,P20646,P20760,P20761,P20762,P50115,P50116,P55091,P98089,Q4G075,Q6TMA8,Q9QX74,Q9R0T3,Q9Z0J6                                                                                                                                                                                                                                        |
| 4714 | 1,3,10,11,<br>12,13,14,1<br>6 | 2,4,5,6,7,8<br>,9,15          | 13 | P06760,P15999,P20646,P20760,P20762,P50115,P50116,P55091,P98089,Q6TMA8,Q8CIZ5,Q9QX74,Q9Z0V6                                                                                                                                                                                                                                                                    |
| 4715 | 1,3,10,11,<br>12,13,15,1<br>6 | 2,4,5,6,7,8<br>,9,14          | 15 | D3ZHA0,D4A5U3,P06760,P20760,P20762,P50115,P50116,P55091,P98089,Q4G075,Q5QE79,Q62635,Q6TMA8,Q8CIZ5,Q9QX74                                                                                                                                                                                                                                                      |
| 4716 | 1,3,10,11,<br>12,14,15,1<br>6 | 2,4,5,6,7,8<br>,9,13          | 18 | D4A5U3,P02631,P06760,P07171,P20760,P25809,P36860,P50115,P50116,P55091,P98089,Q4G075,Q5QE79,Q6TMA8,Q8CIZ5,Q9QX74,Q9R0T3,Q9Z0J6                                                                                                                                                                                                                                 |
| 4717 | 1,3,10,11,<br>13,14,15,1<br>6 | 2,4,5,6,7,8<br>,9,12          | 12 | D4A5U3,P02631,P06760,P20760,P50115,P50116,P55091,P98089,Q6TMA8,Q8CIZ5,Q9QX74,Q9R0T3                                                                                                                                                                                                                                                                           |
| 4718 | 1,3,10,12,<br>13,14,15,1<br>6 | 2,4,5,6,7,8<br>,9,11          | 29 | D4A5U3,P02780,P06760,P06761,P07150,P11598,P20760,P22273,P22282,P31430,P46462,P50115,P50116,P50280,P55091,P70549,P82471,P98089,Q4G075,Q5M8C6,Q63617,Q6B345,Q6P6R2,Q6TMA8,Q8CIZ5,Q9QX74,Q9R0T3,Q9WTT6,Q9Z0J6                                                                                                                                                    |
| 4719 | 1,3,11,12,<br>13,14,15,1<br>6 | 2,4,5,6,7,8<br>,9,10          | 26 | D3ZTX0,D4A5U3,O55004,O70594,P02454,P02631,P06760,P17559,P20646,P20760,P20762,P25031,P36860,P50115,P50116,P55091,P70545,P98089,Q5QE79,Q63618,Q6P6R2,Q6TMA8,Q8CIZ5,Q9QX74,Q9R0T3,Q9Z0V6                                                                                                                                                                         |
| 4720 | 1,4,5,6,7,8<br>,9,10          | 2,3,11,12,<br>13,14,15,1<br>6 | 19 | O70594,P02454,P06760,P06761,P13432,P18418,P20646,P20760,P23928,P25031,P36860,P49134,P50116,P70545,Q6P6R2,Q9QX74,Q9R0T3,Q9Z0V6,Q9Z1F2                                                                                                                                                                                                                          |
| 4721 | 1,4,5,6,7,8<br>,9,11          | 2,3,10,12,<br>13,14,15,1<br>6 | 50 | B1H234,P02780,P02781,P02782,P04905,P06760,P06761,P06911,P07150,P07647,P08723,P09456,P0C0A9,P11598,P13432,P18418,P20646,P20760,P22273,P22282,P22283,P36374,P40241,P46462,P49134,P50115,P50116,P50280,P60905,Q09326,Q3T1J1,Q4G063,Q4G075,Q5GRG2,Q5M8C6,Q63493,Q63617,Q6AYR9,Q6P6R2,Q6P6S4,Q812E4,Q99041,Q9JHB9,Q9JI85,Q9QW07,Q9QX74,Q9QYP2,Q9R0T3,Q9WTT6,Q9Z0J6 |
| 4722 | 1,4,5,6,7,8<br>,9,12          | 2,3,10,11,<br>13,14,15,1<br>6 | 10 | P06760,P06761,P06911,P13432,P18418,P20760,P22282,P36860,Q9QX74,Q9R0T3                                                                                                                                                                                                                                                                                         |
| 4723 | 1,4,5,6,7,8<br>,9,13          | 2,3,10,11,<br>12,14,15,1<br>6 | 11 | P06760,P06761,P13432,P18418,P20646,P20760,P22282,P36860,Q9QX74,Q9R0T3,Q9Z0J6                                                                                                                                                                                                                                                                                  |
| 4724 | 1,4,5,6,7,8<br>,9,14          | 2,3,10,11,<br>12,13,15,1<br>6 | 11 | P06760,P06761,P06911,P13432,P18418,P20646,P20760,P52590,Q5QE79,Q9QX74,Q9R0T3                                                                                                                                                                                                                                                                                  |
| 4725 | 1,4,5,6,7,8<br>,9,15          | 2,3,10,11,<br>12,13,14,1<br>6 | 10 | P06760,P06761,P08721,P13432,P18418,P20646,P20760,P36860,Q9QX74,Q9Z0V6                                                                                                                                                                                                                                                                                         |



4726 1,4,5,6,7,8 2,3,10,11,  
9,16 12,13,14,15

4727 1,4,5,6,7,8 2,3,9,12,1  
10,11 3,14,15,16

4728 1,4,5,6,7,8 2,3,9,11,1  
10,12 3,14,15,16

4729 1,4,5,6,7,8 2,3,9,11,1  
10,13 2,14,15,16

4730 1,4,5,6,7,8 2,3,9,11,1  
10,14 2,13,15,16

4731 1,4,5,6,7,8 2,3,9,11,1  
10,15 2,13,14,16

4732 1,4,5,6,7,8 2,3,9,11,1  
10,16 2,13,14,15

4733 1,4,5,6,7,8 2,3,9,10,1  
11,12 3,14,15,16

4734 1,4,5,6,7,8 2,3,9,10,1  
11,13 2,14,15,16

4735 1,4,5,6,7,8 2,3,9,10,1  
11,14 2,13,15,16

4736 1,4,5,6,7,8 2,3,9,10,1  
11,15 2,13,14,16

19 P02780,P02781,P02782,P06760,P06761,P07647,P13432,P18418,P20646,P20760,P22006,P22282  
,P22283,Q5M8C6,Q6TMA8,Q9JHB9,Q9QX74,Q9R0T3,Q9Z0J6

41 O88917,P02780,P02781,P02782,P04905,P06760,P06761,P06911,P07150,P07647,P08723,P0945  
6,P0C0A9,P11598,P13432,P18418,P22273,P22282,P22283,P25031,P31044,P35952,P36374,P368  
60,P40241,P46462,P50115,P50116,P50280,Q4G063,Q4G075,Q5GRG2,Q5M8C6,Q63493,Q6361  
7,Q6B345,Q99041,Q9JHB9,Q9JI85,Q9QX74,Q9R0T3

21 O88267,P06761,P06911,P0DMW0,P0DMW1,P13432,P18418,P19629,P19814,P20760,P22282,P2  
5031,P30904,P31044,P36860,P48508,P57113,Q5RLM2,Q66HG3,Q9QX74,Q9R0T3,Q9Z1F2

24 A2RUW1,O70257,O70594,P02631,P06761,P07171,P13432,P18418,P20760,P22282,P25031,P309  
04,P31044,P35952,P36860,P46844,P48508,P57113,Q63618,Q8R431,Q9JI85,Q9QX74,Q9R0T3,Q  
9Z1F2

17 A2RUW1,O70594,P06760,P06761,P13432,P18418,P20760,P23928,P25031,P48508,P54921,P571  
13,Q5RLM2,Q923S2,Q9QX74,Q9R0T3,Q9Z1F2

39 A2RUW1,O70594,O88267,O88339,Q4V882,P06761,P08721,P13432,P18418,P19468,P19629,P20  
646,P20760,P23928,P25031,P30904,P36860,P46844,P48508,P51907,P53790,P54921,P57113,Q0  
3248,Q05175,Q3ZAV1,Q5I0E9,Q5M7T9,Q63270,Q63474,Q63618,Q6MG61,Q6PCU2,Q6Q0N1,Q  
8R431,Q923S2,Q9QX74,Q9R0T3,Q9Z0V6,Q9Z1F2

49 O35077,O70257,O70594,O88267,P02780,P02781,P02782,P06761,P07151,P07647,P0DMW0;P0  
DMW1,P13432,P18418,P18757,P19468,P19629,P20646,P20760,P22282,P22283,P23928,P25031,  
P46844,P48508,P53790,P57113,Q03248,Q3ZAV1,Q5I0E9,Q5M7T9,Q5M8C6,Q63270,Q63424,Q  
63618,Q64602,Q68FT5,Q6MG61,Q6Q0N1,Q6TMA8,Q71MB6,Q8R431,Q923S2,Q99MA2,Q9JHB  
9,Q9JJ40,Q9QX74,Q9R0T3,Q9Z0J6,Q9Z0W7

42 O35547,P02780,P02781,P02782,P04905,P06760,P06761,P06911,P07150,P07647,P08723,P0945  
6,P0C0A9,P11598,P12020,P13432,P18418,P19218,P22273,P22282,P22283,P31430,P36374,P402  
41,P46462,P50280,P60905,P97840,Q09326,Q4G063,Q4G075,Q5GRG2,Q5I0D1,Q5M8C6,Q6349  
3,Q63617,Q99041,Q9JHB9,Q9JI85,Q9QW07,Q9QX74,Q9R0T3

42 B1H234,O35547,O88917,P02780,P02781,P02782,P04905,P06760,P06761,P06911,P07150,P0764  
7,P08723,P09456,P0C0A9,P11598,P13432,P18418,P22273,P22282,P22283,P36374,P36860,P402  
41,P46462,P50115,P60905,Q09326,Q4G063,Q4G075,Q5GRG2,Q5M8C6,Q62902,Q63493,Q6361  
7,Q6AYR9,Q99041,Q9JHB9,Q9JI85,Q9QX74,Q9R0T3,Q9Z0J6

43 B1H234,P02780,P02781,P02782,P04905,P06760,P06761,P06911,P07150,P07647,P08723,P09456  
,P0C0A9,P11598,P12020,P13432,P18418,P19218,P20760,P22273,P22282,P22283,P36374,P4024  
1,P46462,P50280,Q09326,Q4FZU2,Q4G063,Q4G075,Q5GRG2,Q5M8C6,Q63493,Q63617,Q6AYR  
9,Q6P6Q2,Q812E4,Q99041,Q9JHB9,Q9JI85,Q9QW07,Q9QX74,Q9R0T3

47 B1H234,P02780,P02781,P02782,P04905,P06760,P06761,P06911,P07150,P07647,P08721,P08723  
,P09456,P0C0A9,P11598,P13432,P18418,P19629,P22273,P22282,P22283,P36374,P40241,P4646  
2,P50280,Q09326,Q4FZU2,Q4G063,Q4G075,Q5GRG2,Q5M8C6,Q63493,Q63617,Q6AYR9,Q6IFU  
8,Q6IFW6,Q6IMF3,Q6P6Q2,Q8CJ52,Q99041,Q9JHB9,Q9JI85,Q9QW07,Q9QX74,Q9R0T3,Q9WT  
T6,Q9Z0V6

4737 1,4,5,6,7,8 2,3,9,10,1  
,11,16 2,13,14,15

4738 1,4,5,6,7,8 2,3,9,10,1  
,12,13 1,14,15,16

4739 1,4,5,6,7,8 2,3,9,10,1  
,12,14 1,13,15,16

4740 1,4,5,6,7,8 2,3,9,10,1  
,12,15 1,13,14,16

4741 1,4,5,6,7,8 2,3,9,10,1  
,12,16 1,13,14,15

4742 1,4,5,6,7,8 2,3,9,10,1  
,13,14 1,12,15,16

4743 1,4,5,6,7,8 2,3,9,10,1  
,13,15 1,12,14,16

4744 1,4,5,6,7,8 2,3,9,10,1  
,13,16 1,12,14,15

4745 1,4,5,6,7,8 2,3,9,10,1  
,14,15 1,12,13,16

4746 1,4,5,6,7,8 2,3,9,10,1  
,14,16 1,12,13,15

4747 1,4,5,6,7,8 2,3,9,10,1  
,15,16 1,12,13,14

4748 1,4,5,6,7,9 2,3,8,12,1  
,10,11 3,14,15,16

4749 1,4,5,6,7,9 2,3,8,11,1  
,10,12 3,14,15,16

4750 1,4,5,6,7,9 2,3,8,11,1  
,10,13 2,14,15,16

4751 1,4,5,6,7,9 2,3,8,11,1  
,10,14 2,13,15,16

4752 1,4,5,6,7,9 2,3,8,11,1  
,10,15 2,13,14,16

4753 1,4,5,6,7,9 2,3,8,11,1  
,10,16 2,13,14,15

4754 1,4,5,6,7,9 2,3,8,10,1  
,11,12 3,14,15,16

B1H234,O35547,O88917,P02780,P02781,P02782,P04905,P06760,P06761,P06911,P07150,P0764  
7,P08010,P08723,P09456,P0C0A9,P11598,P12020,P13432,P18418,P20760,P22273,P22282,P222  
54 83,P24368,P30120,P36374,P40241,P46462,P50115,P50280,P60905,P97523,Q4FZU2,Q4G063,Q4  
G075,Q5GRG2,Q5M8C6,Q62902,Q63493,Q63617,Q6GMN2,Q6P6Q2,Q6TMA8,Q812E4,Q8CFN  
2,Q99041,Q9JHB9,Q9JI85,Q9QW07,Q9QX74,Q9QZK8,Q9R0T3,Q9Z0J6

12 P06761,P06911,P13432,P18418,P19814,P22282,P36860,P97840,Q9JI85,Q9QX74,Q9R0T3,Q9Z2L  
0

12 P06760,P06761,P06911,P13432,P18418,P19218,P20760,P22282,Q5RLM2,Q9QX74,Q9R0T3,Q9Z  
2L0

11 P06761,P06911,P13432,P18418,P19629,P19814,P22282,P36860,Q9QX74,Q9R0T3,Q9Z0V6

18 O88267,P02780,P02781,P02782,P06761,P06911,P07647,P13432,P18418,P20760,P22282,P2228  
3,Q5M8C6,Q6TMA8,Q9JHB9,Q9JI85,Q9QX74,Q9R0T3

17 A2RUW1,P06760,P06761,P06911,P07171,P13432,P18418,P20760,P22282,P52590,Q4G075,Q99  
MH3,Q9JI85,Q9QX74,Q9R0T3,Q9WUW8,Q9Z2L0

12 A2RUW1,P06761,P08721,P13432,P18418,P22282,P36860,Q62714,Q6PCU2,Q9QX74,Q9Z0V6,Q  
9Z2L0

24 O70257,P02780,P02781,P02782,P06761,P06911,P07647,P11598,P13432,P18418,P20760,P2228  
2,P22283,P30120,P46844,Q4G075,Q5M8C6,Q6TMA8,Q99MH3,Q9JHB9,Q9JI85,Q9QX74,Q9R0T  
3,Q9Z0J6

9 A2RUW1,P06761,P13432,P18418,P20760,P54921,Q4G075,Q62714,Q9QX74

20 P02780,P02781,P02782,P06761,P06911,P07647,P13432,P18418,P20760,P22282,P22283,P52590  
,P57113,Q4G075,Q5M8C6,Q6TMA8,Q99MH3,Q9JHB9,Q9QX74,Q9R0T3

29 B2RYW9,O70594,O88267,P02780,P02781,P02782,P06761,P07647,P08721,P13432,P17988,P184  
18,P19629,P20646,P20760,P22282,P22283,P48508,P57113,Q03248,Q5M7T9,Q63270,Q6TMA8,  
Q8CJ52,Q8R431,Q9JHB9,Q9QX74,Q9Z0J6,Q9Z0V6

4 P11598,P36860,Q63617,Q9R0T3

3 P00762,P36860,Q03191

2 P11883,P36860

1 P00762

4 P00762,P08721,P36860,Q811M5

5 P11883,P18418,P22006,Q811M5,Q9Z0J6

6 P11598,P22283,P61206,P84079,Q03191,Q63617,Q9R0T3

|      |                        |                          |    |                                                                                                                     |
|------|------------------------|--------------------------|----|---------------------------------------------------------------------------------------------------------------------|
| 4755 | 1,4,5,6,7,9<br>,11,13  | 2,3,8,10,1<br>2,14,15,16 | 5  | B1H234,P11598,P22283,Q63617,Q9Z0J6                                                                                  |
| 4756 | 1,4,5,6,7,9<br>,11,14  | 2,3,8,10,1<br>2,13,15,16 | 3  | B1H234,P11598,Q63617                                                                                                |
| 4757 | 1,4,5,6,7,9<br>,11,15  | 2,3,8,10,1<br>2,13,14,16 | 4  | B1H234,P08721,Q63617,Q8CJ52                                                                                         |
| 4758 | 1,4,5,6,7,9<br>,11,16  | 2,3,8,10,1<br>2,13,14,15 | 14 | B1H234,P02780,P02781,P02782,P07647,P0C0A9,P11598,P22006,P22283,P36374,Q63617,Q9JH<br>B9,Q9R0T3,Q9Z0J6               |
| 4759 | 1,4,5,6,7,9<br>,12,13  | 2,3,8,10,1<br>1,14,15,16 | 2  | P36860,Q03191                                                                                                       |
| 4760 | 1,4,5,6,7,9<br>,12,14  | 2,3,8,10,1<br>1,13,15,16 | 1  | Q03191                                                                                                              |
| 4761 | 1,4,5,6,7,9<br>,12,15  | 2,3,8,10,1<br>1,13,14,16 | 1  | P36860                                                                                                              |
| 4762 | 1,4,5,6,7,9<br>,12,16  | 2,3,8,10,1<br>1,13,14,15 | 2  | P22006,Q03191                                                                                                       |
| 4763 | 1,4,5,6,7,9<br>,13,14  | 2,3,8,10,1<br>1,12,15,16 | 0  |                                                                                                                     |
| 4764 | 1,4,5,6,7,9<br>,13,15  | 2,3,8,10,1<br>1,12,14,16 | 2  | P36860,P62804                                                                                                       |
| 4765 | 1,4,5,6,7,9<br>,13,16  | 2,3,8,10,1<br>1,12,14,15 | 4  | P11883,P22006,Q9EQS0,Q9Z0J6                                                                                         |
| 4766 | 1,4,5,6,7,9<br>,14,15  | 2,3,8,10,1<br>1,12,13,16 | 1  | P02625                                                                                                              |
| 4767 | 1,4,5,6,7,9<br>,14,16  | 2,3,8,10,1<br>1,12,13,15 | 2  | P22006,P52590                                                                                                       |
| 4768 | 1,4,5,6,7,9<br>,15,16  | 2,3,8,10,1<br>1,12,13,14 | 3  | P08721,P22006,Q9Z0J6                                                                                                |
| 4769 | 1,4,5,6,7,1<br>0,11,12 | 2,3,8,9,13,<br>14,15,16  | 8  | P11598,P22283,P36374,P36860,P47967,P97840,Q5I0D1,Q9R0T3                                                             |
| 4770 | 1,4,5,6,7,1<br>0,11,13 | 2,3,8,9,12,<br>14,15,16  | 9  | B1H234,P11598,P22283,P36376,P36860,P97840,Q63617,Q99041,Q9R0T3                                                      |
| 4771 | 1,4,5,6,7,1<br>0,11,14 | 2,3,8,9,12,<br>13,15,16  | 5  | B1H234,P11598,P22283,P36376,Q99041                                                                                  |
| 4772 | 1,4,5,6,7,1<br>0,11,15 | 2,3,8,9,12,<br>13,14,16  | 6  | P08721,P11598,P17988,P22283,P36860,Q8CJ52                                                                           |
| 4773 | 1,4,5,6,7,1<br>0,11,16 | 2,3,8,9,12,<br>13,14,15  | 16 | P02780,P02781,P02782,P07647,P0C0A9,P11598,P17988,P18418,P22283,P36374,P36376,Q6361<br>7,Q99041,Q9JHB9,Q9R0T3,Q9Z0J6 |
| 4774 | 1,4,5,6,7,1<br>0,12,13 | 2,3,8,9,11,<br>14,15,16  | 2  | P36860,P97840                                                                                                       |

|      |                        |                         |    |                                                                                                                                      |
|------|------------------------|-------------------------|----|--------------------------------------------------------------------------------------------------------------------------------------|
| 4775 | 1,4,5,6,7,1<br>0,12,14 | 2,3,8,9,11,<br>13,15,16 | 1  | Q5RLM2                                                                                                                               |
| 4776 | 1,4,5,6,7,1<br>0,12,15 | 2,3,8,9,11,<br>13,14,16 | 4  | P08721,P10758,P19814,P36860                                                                                                          |
| 4777 | 1,4,5,6,7,1<br>0,12,16 | 2,3,8,9,11,<br>13,14,15 | 4  | P0DMW0;P0DMW1,P57113,P97840,Q03248                                                                                                   |
| 4778 | 1,4,5,6,7,1<br>0,13,14 | 2,3,8,9,11,<br>12,15,16 | 2  | A2RUW1,P36376                                                                                                                        |
| 4779 | 1,4,5,6,7,1<br>0,13,15 | 2,3,8,9,11,<br>12,14,16 | 4  | A2RUW1,P08721,P11883,P36860                                                                                                          |
| 4780 | 1,4,5,6,7,1<br>0,13,16 | 2,3,8,9,11,<br>12,14,15 | 8  | P07647,P11883,P18418,P36376,P36860,P57113,Q99MH3,Q9Z0J6                                                                              |
| 4781 | 1,4,5,6,7,1<br>0,14,15 | 2,3,8,9,11,<br>12,13,16 | 3  | A2RUW1,P08721,P54921                                                                                                                 |
| 4782 | 1,4,5,6,7,1<br>0,14,16 | 2,3,8,9,11,<br>12,13,15 | 4  | P09527,P36376,P57113,Q99MH3                                                                                                          |
| 4783 | 1,4,5,6,7,1<br>0,15,16 | 2,3,8,9,11,<br>12,13,14 | 10 | P08721,P09527,P11883,P17988,P19468,P57113,Q03248,Q63270,Q64335,Q8R431                                                                |
| 4784 | 1,4,5,6,7,1<br>1,12,13 | 2,3,8,9,10,<br>14,15,16 | 8  | P11598,P22283,P36374,P47967,P97840,Q5I0D1,Q63617,Q9R0T3                                                                              |
| 4785 | 1,4,5,6,7,1<br>1,12,14 | 2,3,8,9,10,<br>13,15,16 | 4  | P11598,P19218,P22283,P36374                                                                                                          |
| 4786 | 1,4,5,6,7,1<br>1,12,15 | 2,3,8,9,10,<br>13,14,16 | 6  | P08721,P11598,P22283,P36374,P97840,Q8CJ52                                                                                            |
| 4787 | 1,4,5,6,7,1<br>1,12,16 | 2,3,8,9,10,<br>13,14,15 | 15 | O35547,P02780,P02781,P02782,P07647,P0C0A9,P11598,P22283,P36374,P97840,Q63617,Q9JHB9,Q9QW07,Q9R0T3,Q9Z0J6                             |
| 4788 | 1,4,5,6,7,1<br>1,13,14 | 2,3,8,9,10,<br>12,15,16 | 6  | B1H234,P11598,P22283,P36376,Q63617,Q99041                                                                                            |
| 4789 | 1,4,5,6,7,1<br>1,13,15 | 2,3,8,9,10,<br>12,14,16 | 8  | B1H234,P08721,P11598,P22283,P36860,Q63617,Q8CJ52,Q99041                                                                              |
| 4790 | 1,4,5,6,7,1<br>1,13,16 | 2,3,8,9,10,<br>12,14,15 | 19 | B1H234,O35547,P00714,P02780,P02781,P02782,P07647,P09456,P0C0A9,P11598,P22283,P36374,P36376,Q63617,Q99041,Q99MH3,Q9JHB9,Q9R0T3,Q9Z0J6 |
| 4791 | 1,4,5,6,7,1<br>1,14,15 | 2,3,8,9,10,<br>12,13,16 | 6  | B1H234,P08721,P11598,Q4FZU2,Q8CJ52,Q99041                                                                                            |
| 4792 | 1,4,5,6,7,1<br>1,14,16 | 2,3,8,9,10,<br>12,13,15 | 16 | B1H234,O35547,P02780,P02781,P02782,P07647,P0C0A9,P11598,P22283,P36374,P36376,P52590,Q63617,Q99041,Q99MH3,Q9JHB9                      |
| 4793 | 1,4,5,6,7,1<br>1,15,16 | 2,3,8,9,10,<br>12,13,14 | 16 | B1H234,P02780,P02781,P02782,P07647,P08721,P0C0A9,P11598,P17988,P22283,P36374,Q4FZU2,Q6P6Q2,Q8CJ52,Q9JHB9,Q9Z0J6                      |
| 4794 | 1,4,5,6,7,1<br>2,13,14 | 2,3,8,9,10,<br>11,15,16 | 1  | Q9Z2L0                                                                                                                               |

|      |                        |                          |    |                                                                                                                                                                      |
|------|------------------------|--------------------------|----|----------------------------------------------------------------------------------------------------------------------------------------------------------------------|
| 4795 | 1,4,5,6,7,1<br>2,13,15 | 2,3,8,9,10,<br>11,14,16  | 3  | P19814,P36860,P97840                                                                                                                                                 |
| 4796 | 1,4,5,6,7,1<br>2,13,16 | 2,3,8,9,10,<br>11,14,15  | 3  | P07647,P97840,Q99MH3                                                                                                                                                 |
| 4797 | 1,4,5,6,7,1<br>2,14,15 | 2,3,8,9,10,<br>11,13,16  | 0  |                                                                                                                                                                      |
| 4798 | 1,4,5,6,7,1<br>2,14,16 | 2,3,8,9,10,<br>11,13,15  | 1  | Q99MH3                                                                                                                                                               |
| 4799 | 1,4,5,6,7,1<br>2,15,16 | 2,3,8,9,10,<br>11,13,14  | 3  | P08721,P10758,P17988                                                                                                                                                 |
| 4800 | 1,4,5,6,7,1<br>3,14,15 | 2,3,8,9,10,<br>11,12,16  | 1  | A2RUW1                                                                                                                                                               |
| 4801 | 1,4,5,6,7,1<br>3,14,16 | 2,3,8,9,10,<br>11,12,15  | 4  | P07647,P36376,P52590,Q99MH3                                                                                                                                          |
| 4802 | 1,4,5,6,7,1<br>3,15,16 | 2,3,8,9,10,<br>11,12,14  | 4  | P08721,P10719,P11883,Q9Z0J6                                                                                                                                          |
| 4803 | 1,4,5,6,7,1<br>4,15,16 | 2,3,8,9,10,<br>11,12,13  | 2  | P10719,P17988                                                                                                                                                        |
| 4804 | 1,4,5,6,8,9<br>,10,11  | 2,3,7,12,1<br>3,14,15,16 | 5  | P18418,P20760,P25031,P49134,Q6AY61                                                                                                                                   |
| 4805 | 1,4,5,6,8,9<br>,10,12  | 2,3,7,11,1<br>3,14,15,16 | 4  | P18418,P20760,P25031,P36860                                                                                                                                          |
| 4806 | 1,4,5,6,8,9<br>,10,13  | 2,3,7,11,1<br>2,14,15,16 | 4  | P18418,P20760,P25031,P36860                                                                                                                                          |
| 4807 | 1,4,5,6,8,9<br>,10,14  | 2,3,7,11,1<br>2,13,15,16 | 4  | P13432,P18418,P20760,P25031                                                                                                                                          |
| 4808 | 1,4,5,6,8,9<br>,10,15  | 2,3,7,11,1<br>2,13,14,16 | 7  | P13432,P18418,P20760,P25031,P36860,Q63474,Q811M5                                                                                                                     |
| 4809 | 1,4,5,6,8,9<br>,10,16  | 2,3,7,11,1<br>2,13,14,15 | 5  | P13432,P18418,P20760,P25031,Q811M5                                                                                                                                   |
| 4810 | 1,4,5,6,8,9<br>,11,12  | 2,3,7,10,1<br>3,14,15,16 | 11 | P18418,P36374,P60905,P61206,P84079,P63095,Q03191,Q3T1J1,Q5RKI1,Q63493,Q6Q7Y5,Q9JI8                                                                                   |
| 4811 | 1,4,5,6,8,9<br>,11,13  | 2,3,7,10,1<br>2,14,15,16 | 5  |                                                                                                                                                                      |
| 4812 | 1,4,5,6,8,9<br>,11,14  | 2,3,7,10,1<br>2,13,15,16 | 6  | P18418,P60905,Q5RKI1,Q63493,Q6AY61,Q9JI85                                                                                                                            |
| 4813 | 1,4,5,6,8,9<br>,11,15  | 2,3,7,10,1<br>2,13,14,16 | 6  | P20760,P20766,Q3T1J1,Q5RKI1,Q6AY61,Q812E4                                                                                                                            |
| 4814 | 1,4,5,6,8,9<br>,11,16  | 2,3,7,10,1<br>2,13,14,15 | 8  | P13432,P60905,Q4FZU2,Q6IFU8,Q6IMF3,Q6P6Q2,Q6P6S4,Q8CJ52                                                                                                              |
|      |                        |                          | 23 | O35547,P02780,P02781,P02782,P04905,P07647,P08723,P09456,P18418,P20760,P22006,P2228<br>2,P30120,P36374,P46462,P60905,Q5RKI1,Q63493,Q6AY61,Q812E4,Q9JHB9,Q9QW07,Q9Z0J6 |

|      |                        |                          |    |                                                                                                                                      |
|------|------------------------|--------------------------|----|--------------------------------------------------------------------------------------------------------------------------------------|
| 4815 | 1,4,5,6,8,9<br>,12,13  | 2,3,7,10,1<br>1,14,15,16 | 2  | P20766,Q5RKI1                                                                                                                        |
| 4816 | 1,4,5,6,8,9<br>,12,14  | 2,3,7,10,1<br>1,13,15,16 | 3  | P20760,P20766,Q5RKI1                                                                                                                 |
| 4817 | 1,4,5,6,8,9<br>,12,15  | 2,3,7,10,1<br>1,13,14,16 | 1  | P13432                                                                                                                               |
| 4818 | 1,4,5,6,8,9<br>,12,16  | 2,3,7,10,1<br>1,13,14,15 | 4  | P13432,P18418,P20760,Q5RKI1                                                                                                          |
| 4819 | 1,4,5,6,8,9<br>,13,14  | 2,3,7,10,1<br>1,12,15,16 | 3  | P20760,P20766,Q5RKI1                                                                                                                 |
| 4820 | 1,4,5,6,8,9<br>,13,15  | 2,3,7,10,1<br>1,12,14,16 | 2  | P13432,P62804                                                                                                                        |
| 4821 | 1,4,5,6,8,9<br>,13,16  | 2,3,7,10,1<br>1,12,14,15 | 4  | P13432,P18418,P20760,Q5RKI1                                                                                                          |
| 4822 | 1,4,5,6,8,9<br>,14,15  | 2,3,7,10,1<br>1,12,13,16 | 3  | P13432,P20760,P20766                                                                                                                 |
| 4823 | 1,4,5,6,8,9<br>,14,16  | 2,3,7,10,1<br>1,12,13,15 | 7  | P13432,P18418,P20760,P20766,P23593,P52590,Q5RKI1                                                                                     |
| 4824 | 1,4,5,6,8,9<br>,15,16  | 2,3,7,10,1<br>1,12,13,14 | 4  | P13432,P18418,P20760,P23593                                                                                                          |
| 4825 | 1,4,5,6,8,1<br>0,11,12 | 2,3,7,9,13,<br>14,15,16  | 5  | P18418,P22282,P25031,P36374,Q9JI85                                                                                                   |
| 4826 | 1,4,5,6,8,1<br>0,11,13 | 2,3,7,9,12,<br>14,15,16  | 4  | P18418,P22282,P25031,Q9JI85                                                                                                          |
| 4827 | 1,4,5,6,8,1<br>0,11,14 | 2,3,7,9,12,<br>13,15,16  | 3  | P18418,P19218,Q99041                                                                                                                 |
| 4828 | 1,4,5,6,8,1<br>0,11,15 | 2,3,7,9,12,<br>13,14,16  | 6  | P18418,Q4FZU2,Q6IFU8,Q6IFW6,Q6IMF3,Q6P6Q2                                                                                            |
| 4829 | 1,4,5,6,8,1<br>0,11,16 | 2,3,7,9,12,<br>13,14,15  | 19 | O88917,P02780,P02781,P02782,P04905,P07647,P08723,P0C0A9,P15399,P18418,P22282,P25031,P30120,P36374,P60905,Q5M8C6,Q6AY61,Q9JHB9,Q9JI85 |
| 4830 | 1,4,5,6,8,1<br>0,12,13 | 2,3,7,9,11,<br>14,15,16  | 4  | P18418,P25031,P35280,P36860                                                                                                          |
| 4831 | 1,4,5,6,8,1<br>0,12,14 | 2,3,7,9,11,<br>13,15,16  | 4  | P18418,P25031,P35280,P54921                                                                                                          |
| 4832 | 1,4,5,6,8,1<br>0,12,15 | 2,3,7,9,11,<br>13,14,16  | 7  | O88267,P0DMW0,P0DMW1,P13432,P18418,P25031,P36860,P54921                                                                              |
| 4833 | 1,4,5,6,8,1<br>0,12,16 | 2,3,7,9,11,<br>13,14,15  | 6  | O88267,P0DMW0,P0DMW1,P13432,P18418,P25031,P35280                                                                                     |
| 4834 | 1,4,5,6,8,1<br>0,13,14 | 2,3,7,9,11,<br>12,15,16  | 3  | P18418,P25031,P35280                                                                                                                 |

|      |                        |                         |    |                                                                                                                                                                                       |
|------|------------------------|-------------------------|----|---------------------------------------------------------------------------------------------------------------------------------------------------------------------------------------|
| 4835 | 1,4,5,6,8,1<br>0,13,15 | 2,3,7,9,11,<br>12,14,16 | 5  | P13432,P18418,P25031,P36860,P62804                                                                                                                                                    |
| 4836 | 1,4,5,6,8,1<br>0,13,16 | 2,3,7,9,11,<br>12,14,15 | 7  | O70257,P11883,P13432,P18418,P20760,P25031,P35280                                                                                                                                      |
| 4837 | 1,4,5,6,8,1<br>0,14,15 | 2,3,7,9,11,<br>12,13,16 | 4  | P13432,P18418,P25031,P54921                                                                                                                                                           |
| 4838 | 1,4,5,6,8,1<br>0,14,16 | 2,3,7,9,11,<br>12,13,15 | 6  | P13432,P18418,P20760,P25031,P35280,P54921                                                                                                                                             |
| 4839 | 1,4,5,6,8,1<br>0,15,16 | 2,3,7,9,11,<br>12,13,14 | 9  | O35077,O88267,P13432,P15399,P18418,P20760,P25031,P54921,Q8R431                                                                                                                        |
| 4840 | 1,4,5,6,8,1<br>1,12,13 | 2,3,7,9,10,<br>14,15,16 | 11 | O35547,P06911,P14046,P20766,P22282,P36374,P46462,P60905,Q5RKI1,Q63493,Q9JI85                                                                                                          |
| 4841 | 1,4,5,6,8,1<br>1,12,14 | 2,3,7,9,10,<br>13,15,16 | 8  | P06911,P12020,P19218,P20766,P36374,Q5GRG2,Q5RKI1,Q9JI85                                                                                                                               |
| 4842 | 1,4,5,6,8,1<br>1,12,15 | 2,3,7,9,10,<br>13,14,16 | 8  | P36374,Q4FZU2,Q63493,Q6IFU8,Q6IFW6,Q6IMF3,Q6P6Q2,Q9QW07                                                                                                                               |
| 4843 | 1,4,5,6,8,1<br>1,12,16 | 2,3,7,9,10,<br>13,14,15 | 26 | O35547,P02780,P02781,P02782,P04905,P06911,P07647,P08010,P08723,P0C0A9,P12020,P18418,P22282,P22283,P30120,P36374,P40241,P46462,P60905,Q5M8C6,Q5RKI1,Q63493,Q8CFN2,Q9JHB9,Q9JI85,Q9QW07 |
| 4844 | 1,4,5,6,8,1<br>1,13,14 | 2,3,7,9,10,<br>12,15,16 | 8  | O54728,P19218,P20766,P22282,Q09326,Q5RKI1,Q99041,Q9JI85                                                                                                                               |
| 4845 | 1,4,5,6,8,1<br>1,13,15 | 2,3,7,9,10,<br>12,14,16 | 10 | P20766,P36374,P60905,Q4FZU2,Q6IFU8,Q6IFW6,Q6IG02,Q6IMF3,Q6P6Q2,Q9JI85                                                                                                                 |
| 4846 | 1,4,5,6,8,1<br>1,13,16 | 2,3,7,9,10,<br>12,14,15 | 24 | O35547,P02780,P02781,P02782,P04905,P07647,P08723,P09456,P0C0A9,P18418,P22282,P22283,P30120,P36374,P46462,P60905,Q5M8C6,Q5RKI1,Q63493,Q6AY61,Q6GMN2,Q99041,Q9JHB9,Q9JI85               |
| 4847 | 1,4,5,6,8,1<br>1,14,15 | 2,3,7,9,10,<br>12,13,16 | 8  | P19218,P20766,Q4FZU2,Q6IFU8,Q6IFW6,Q6IMF3,Q6P6Q2,Q8CJ52                                                                                                                               |
| 4848 | 1,4,5,6,8,1<br>1,14,16 | 2,3,7,9,10,<br>12,13,15 | 26 | O35547,O54728,P02780,P02781,P02782,P04905,P07647,P08723,P09456,P0C0A9,P18418,P19218,P20760,P20766,P22282,P30120,P36374,P46462,P60905,Q5M8C6,Q5RKI1,Q6AY61,Q6GMN2,Q99041,Q9JHB9,Q9JI85 |
| 4849 | 1,4,5,6,8,1<br>1,15,16 | 2,3,7,9,10,<br>12,13,14 | 24 | O35547,P02780,P02781,P02782,P04905,P07647,P08723,P0C0A9,P13432,P18418,P22282,P30120,P36374,P46462,P60905,Q10758,Q4FZU2,Q6IFU8,Q6IFW6,Q6IMF3,Q6P6Q2,Q8CJ52,Q9JHB9,Q9QW07               |
| 4850 | 1,4,5,6,8,1<br>2,13,14 | 2,3,7,9,10,<br>11,15,16 | 4  | P19218,P20766,P35280,Q5RKI1                                                                                                                                                           |
| 4851 | 1,4,5,6,8,1<br>2,13,15 | 2,3,7,9,10,<br>11,14,16 | 2  | P13432,P20766                                                                                                                                                                         |
| 4852 | 1,4,5,6,8,1<br>2,13,16 | 2,3,7,9,10,<br>11,14,15 | 4  | P18418,P20766,P35280,Q5RKI1                                                                                                                                                           |

|      |                        |                         |                                                                  |
|------|------------------------|-------------------------|------------------------------------------------------------------|
| 4853 | 1,4,5,6,8,1<br>2,14,15 | 2,3,7,9,10,<br>11,13,16 | 3 P13432,P20766,P54921                                           |
| 4854 | 1,4,5,6,8,1<br>2,14,16 | 2,3,7,9,10,<br>11,13,15 | 5 P13432,P20760,P20766,P35280,Q5RKI1                             |
| 4855 | 1,4,5,6,8,1<br>2,15,16 | 2,3,7,9,10,<br>11,13,14 | 1 P13432                                                         |
| 4856 | 1,4,5,6,8,1<br>3,14,15 | 2,3,7,9,10,<br>11,12,16 | 2 P13432,P20766                                                  |
| 4857 | 1,4,5,6,8,1<br>3,14,16 | 2,3,7,9,10,<br>11,12,15 | 9 O54728,P13432,P18418,P20760,P20766,P35280,P52590,Q5RKI1,Q99MH3 |
| 4858 | 1,4,5,6,8,1<br>3,15,16 | 2,3,7,9,10,<br>11,12,14 | 2 P13432,P18418                                                  |
| 4859 | 1,4,5,6,8,1<br>4,15,16 | 2,3,7,9,10,<br>11,12,13 | 4 P13432,P20760,P20766,P54921                                    |
| 4860 | 1,4,5,6,9,1<br>0,11,12 | 2,3,7,8,13,<br>14,15,16 | 1 Q03191                                                         |
| 4861 | 1,4,5,6,9,1<br>0,11,13 | 2,3,7,8,12,<br>14,15,16 | 0                                                                |
| 4862 | 1,4,5,6,9,1<br>0,11,14 | 2,3,7,8,12,<br>13,15,16 | 0                                                                |
| 4863 | 1,4,5,6,9,1<br>0,11,15 | 2,3,7,8,12,<br>13,14,16 | 1 Q811M5                                                         |
| 4864 | 1,4,5,6,9,1<br>0,11,16 | 2,3,7,8,12,<br>13,14,15 | 0                                                                |
| 4865 | 1,4,5,6,9,1<br>0,12,13 | 2,3,7,8,11,<br>14,15,16 | 2 P36860,Q03191                                                  |
| 4866 | 1,4,5,6,9,1<br>0,12,14 | 2,3,7,8,11,<br>13,15,16 | 1 Q03191                                                         |
| 4867 | 1,4,5,6,9,1<br>0,12,15 | 2,3,7,8,11,<br>13,14,16 | 1 Q811M5                                                         |
| 4868 | 1,4,5,6,9,1<br>0,12,16 | 2,3,7,8,11,<br>13,14,15 | 2 Q03191,Q811M5                                                  |
| 4869 | 1,4,5,6,9,1<br>0,13,14 | 2,3,7,8,11,<br>12,15,16 | 1 Q00715                                                         |
| 4870 | 1,4,5,6,9,1<br>0,13,15 | 2,3,7,8,11,<br>12,14,16 | 5 P11883,P36860,P62804,Q00715,Q811M5                             |
| 4871 | 1,4,5,6,9,1<br>0,13,16 | 2,3,7,8,11,<br>12,14,15 | 2 P11883,Q811M5                                                  |
| 4872 | 1,4,5,6,9,1<br>0,14,15 | 2,3,7,8,11,<br>12,13,16 | 4 P30120,P62804,Q00715,Q811M5                                    |



|      |                        |                         |                                                                  |
|------|------------------------|-------------------------|------------------------------------------------------------------|
| 4873 | 1,4,5,6,9,1<br>0,14,16 | 2,3,7,8,11,<br>12,13,15 | 0                                                                |
| 4874 | 1,4,5,6,9,1<br>0,15,16 | 2,3,7,8,11,<br>12,13,14 | 2 P11883,Q811M5                                                  |
| 4875 | 1,4,5,6,9,1<br>1,12,13 | 2,3,7,8,10,<br>14,15,16 | 6 P20766,P61206;P84079,Q03191,Q5RKI1,Q62761;Q62762;Q62763,Q64093 |
| 4876 | 1,4,5,6,9,1<br>1,12,14 | 2,3,7,8,10,<br>13,15,16 | 8 P19468,P20766,P61206;P84079,Q03191,Q5RKI1,Q63424,Q64093,Q9WTW7 |
| 4877 | 1,4,5,6,9,1<br>1,12,15 | 2,3,7,8,10,<br>13,14,16 | 3 P20766,Q03191,Q62761;Q62762;Q62763                             |
| 4878 | 1,4,5,6,9,1<br>1,12,16 | 2,3,7,8,10,<br>13,14,15 | 2 Q03191,Q5RKI1                                                  |
| 4879 | 1,4,5,6,9,1<br>1,13,14 | 2,3,7,8,10,<br>12,15,16 | 5 P20766,Q5RKI1,Q63598,Q64093,Q9WTW7                             |
| 4880 | 1,4,5,6,9,1<br>1,13,15 | 2,3,7,8,10,<br>12,14,16 | 1 P20766                                                         |
| 4881 | 1,4,5,6,9,1<br>1,13,16 | 2,3,7,8,10,<br>12,14,15 | 4 P20766,Q5RKI1,Q9EQS0,Q9Z0J6                                    |
| 4882 | 1,4,5,6,9,1<br>1,14,15 | 2,3,7,8,10,<br>12,13,16 | 3 P20766,Q64093,Q923V8                                           |
| 4883 | 1,4,5,6,9,1<br>1,14,16 | 2,3,7,8,10,<br>12,13,15 | 2 P20766,Q5RKI1                                                  |
| 4884 | 1,4,5,6,9,1<br>1,15,16 | 2,3,7,8,10,<br>12,13,14 | 1 Q8CJ52                                                         |
| 4885 | 1,4,5,6,9,1<br>2,13,14 | 2,3,7,8,10,<br>11,15,16 | 4 P20766,Q03191,Q5RKI1,Q9WTW7                                    |
| 4886 | 1,4,5,6,9,1<br>2,13,15 | 2,3,7,8,10,<br>11,14,16 | 3 P20766,P62804,Q00715                                           |
| 4887 | 1,4,5,6,9,1<br>2,13,16 | 2,3,7,8,10,<br>11,14,15 | 3 P20766,Q03191,Q5RKI1                                           |
| 4888 | 1,4,5,6,9,1<br>2,14,15 | 2,3,7,8,10,<br>11,13,16 | 1 P20766                                                         |
| 4889 | 1,4,5,6,9,1<br>2,14,16 | 2,3,7,8,10,<br>11,13,15 | 3 P20766,Q03191,Q5RKI1                                           |
| 4890 | 1,4,5,6,9,1<br>2,15,16 | 2,3,7,8,10,<br>11,13,14 | 0                                                                |
| 4891 | 1,4,5,6,9,1<br>3,14,15 | 2,3,7,8,10,<br>11,12,16 | 3 P20766,P62804,Q00715                                           |
| 4892 | 1,4,5,6,9,1<br>3,14,16 | 2,3,7,8,10,<br>11,12,15 | 2 P20766,Q5RKI1                                                  |

|      |                         |                         |                               |
|------|-------------------------|-------------------------|-------------------------------|
| 4893 | 1,4,5,6,9,1<br>3,15,16  | 2,3,7,8,10,<br>11,12,14 | 3 P11883,P20766,P62804        |
| 4894 | 1,4,5,6,9,1<br>4,15,16  | 2,3,7,8,10,<br>11,12,13 | 2 P20766,P47967               |
| 4895 | 1,4,5,6,10,<br>11,12,13 | 2,3,7,8,9,1<br>4,15,16  | 1 P35280                      |
| 4896 | 1,4,5,6,10,<br>11,12,14 | 2,3,7,8,9,1<br>3,15,16  | 1 P35280                      |
| 4897 | 1,4,5,6,10,<br>11,12,15 | 2,3,7,8,9,1<br>3,14,16  | 0                             |
| 4898 | 1,4,5,6,10,<br>11,12,16 | 2,3,7,8,9,1<br>3,14,15  | 1 P35280                      |
| 4899 | 1,4,5,6,10,<br>11,13,14 | 2,3,7,8,9,1<br>2,15,16  | 2 P35280,P36376               |
| 4900 | 1,4,5,6,10,<br>11,13,15 | 2,3,7,8,9,1<br>2,14,16  | 0                             |
| 4901 | 1,4,5,6,10,<br>11,13,16 | 2,3,7,8,9,1<br>2,14,15  | 3 P07647,P35280,P36376        |
| 4902 | 1,4,5,6,10,<br>11,14,15 | 2,3,7,8,9,1<br>2,13,16  | 0                             |
| 4903 | 1,4,5,6,10,<br>11,14,16 | 2,3,7,8,9,1<br>2,13,15  | 2 P35280,P36376               |
| 4904 | 1,4,5,6,10,<br>11,15,16 | 2,3,7,8,9,1<br>2,13,14  | 1 P17988                      |
| 4905 | 1,4,5,6,10,<br>12,13,14 | 2,3,7,8,9,1<br>1,15,16  | 1 P35280                      |
| 4906 | 1,4,5,6,10,<br>12,13,15 | 2,3,7,8,9,1<br>1,14,16  | 2 P35280,P36860               |
| 4907 | 1,4,5,6,10,<br>12,13,16 | 2,3,7,8,9,1<br>1,14,15  | 2 P0DMW0;P0DMW1,P35280        |
| 4908 | 1,4,5,6,10,<br>12,14,15 | 2,3,7,8,9,1<br>1,13,16  | 2 P35280,P54921               |
| 4909 | 1,4,5,6,10,<br>12,14,16 | 2,3,7,8,9,1<br>1,13,15  | 1 P35280                      |
| 4910 | 1,4,5,6,10,<br>12,15,16 | 2,3,7,8,9,1<br>1,13,14  | 2 P0DMW0;P0DMW1,P35280        |
| 4911 | 1,4,5,6,10,<br>13,14,15 | 2,3,7,8,9,1<br>1,12,16  | 4 A2RUW1,P35280,P62804,Q00715 |
| 4912 | 1,4,5,6,10,<br>13,14,16 | 2,3,7,8,9,1<br>1,12,15  | 3 P35280,P36376,Q99MH3        |

|      |                                             |                                                           |
|------|---------------------------------------------|-----------------------------------------------------------|
| 4913 | 1,4,5,6,10, 2,3,7,8,9,1<br>13,15,16 1,12,14 | 2 P11883,P35280                                           |
| 4914 | 1,4,5,6,10, 2,3,7,8,9,1<br>14,15,16 1,12,13 | 2 P35280,P54921                                           |
| 4915 | 1,4,5,6,11, 2,3,7,8,9,1<br>12,13,14 0,15,16 | 4 P19218,P20766,P35280,Q5RKI1                             |
| 4916 | 1,4,5,6,11, 2,3,7,8,9,1<br>12,13,15 0,14,16 | 1 P20766                                                  |
| 4917 | 1,4,5,6,11, 2,3,7,8,9,1<br>12,13,16 0,14,15 | 5 O35547,P07647,P20766,P35280,Q5RKI1                      |
| 4918 | 1,4,5,6,11, 2,3,7,8,9,1<br>12,14,15 0,13,16 | 1 P20766                                                  |
| 4919 | 1,4,5,6,11, 2,3,7,8,9,1<br>12,14,16 0,13,15 | 3 P20766,P35280,Q5RKI1                                    |
| 4920 | 1,4,5,6,11, 2,3,7,8,9,1<br>12,15,16 0,13,14 | 1 P20766                                                  |
| 4921 | 1,4,5,6,11, 2,3,7,8,9,1<br>13,14,15 0,12,16 | 1 P20766                                                  |
| 4922 | 1,4,5,6,11, 2,3,7,8,9,1<br>13,14,16 0,12,15 | 7 O54728,P07647,P20766,P35280,P36376,Q5RKI1,Q99MH3        |
| 4923 | 1,4,5,6,11, 2,3,7,8,9,1<br>13,15,16 0,12,14 | 2 O70417,P20766                                           |
| 4924 | 1,4,5,6,11, 2,3,7,8,9,1<br>14,15,16 0,12,13 | 2 P20766,Q8CJ52                                           |
| 4925 | 1,4,5,6,12, 2,3,7,8,9,1<br>13,14,15 0,11,16 | 2 P20766,P35280                                           |
| 4926 | 1,4,5,6,12, 2,3,7,8,9,1<br>13,14,16 0,11,15 | 4 P20766,P35280,Q5RKI1,Q99MH3                             |
| 4927 | 1,4,5,6,12, 2,3,7,8,9,1<br>13,15,16 0,11,14 | 2 P20766,P35280                                           |
| 4928 | 1,4,5,6,12, 2,3,7,8,9,1<br>14,15,16 0,11,13 | 2 P20766,P35280                                           |
| 4929 | 1,4,5,6,13, 2,3,7,8,9,1<br>14,15,16 0,11,12 | 2 P20766,P35280                                           |
| 4930 | 1,4,5,7,8,9 2,3,6,12,1<br>,10,11 3,14,15,16 | 8 P06760,P20646,P27590,P49134,P70545,Q63493,Q6B345,Q6P6R2 |
| 4931 | 1,4,5,7,8,9 2,3,6,11,1<br>,10,12 3,14,15,16 | 5 P06760,P20646,P49134,Q03191,Q9Z1F2                      |
| 4932 | 1,4,5,7,8,9 2,3,6,11,1<br>,10,13 2,14,15,16 | 3 P06760,P20646,Q9Z1F2                                    |

|      |                        |                          |    |                                                                                                                                                                  |
|------|------------------------|--------------------------|----|------------------------------------------------------------------------------------------------------------------------------------------------------------------|
| 4933 | 1,4,5,7,8,9<br>,10,14  | 2,3,6,11,1<br>2,13,15,16 | 4  | P06760,P20646,P20760,Q9Z1F2                                                                                                                                      |
| 4934 | 1,4,5,7,8,9<br>,10,15  | 2,3,6,11,1<br>2,13,14,16 | 6  | P06760,P20646,P35745,P49134,Q9Z0V6,Q9Z1F2                                                                                                                        |
| 4935 | 1,4,5,7,8,9<br>,10,16  | 2,3,6,11,1<br>2,13,14,15 | 5  | P06760,P20646,P20760,P49134,P70545                                                                                                                               |
| 4936 | 1,4,5,7,8,9<br>,11,12  | 2,3,6,10,1<br>3,14,15,16 | 10 | P02780,P06760,P22282,P27590,P36374,P49134,Q03191,Q63493,Q6Q7Y5,Q812E4                                                                                            |
| 4937 | 1,4,5,7,8,9<br>,11,13  | 2,3,6,10,1<br>2,14,15,16 | 9  | P02780,P06760,P20646,P22282,P36374,P60905,P97697,Q63493,Q812E4                                                                                                   |
| 4938 | 1,4,5,7,8,9<br>,11,14  | 2,3,6,10,1<br>2,13,15,16 | 7  | P06760,P07150,P08649,P20646,Q4G075,Q63493,Q812E4                                                                                                                 |
| 4939 | 1,4,5,7,8,9<br>,11,15  | 2,3,6,10,1<br>2,13,14,16 | 12 | P06760,P20646,P36374,P49134,Q4FZU2,Q63493,Q6IFU8,Q6IFW6,Q6IMF3,Q6P6Q2,Q8CJ52,Q9Z0V6                                                                              |
| 4940 | 1,4,5,7,8,9<br>,11,16  | 2,3,6,10,1<br>2,13,14,15 | 23 | P02780,P02781,P02782,P04905,P06760,P07647,P08649,P08723,P09456,P0C0A9,P20646,P22282,P22283,P30120,P36374,P49134,P60905,Q5M8C6,Q63493,Q6P6Q2,Q812E4,Q9JHB9,Q9Z0J6 |
| 4941 | 1,4,5,7,8,9<br>,12,13  | 2,3,6,10,1<br>1,14,15,16 | 2  | P06760,Q03191                                                                                                                                                    |
| 4942 | 1,4,5,7,8,9<br>,12,14  | 2,3,6,10,1<br>1,13,15,16 | 1  | P06760                                                                                                                                                           |
| 4943 | 1,4,5,7,8,9<br>,12,15  | 2,3,6,10,1<br>1,13,14,16 | 4  | P06760,P20646,P35745,Q9Z0V6                                                                                                                                      |
| 4944 | 1,4,5,7,8,9<br>,12,16  | 2,3,6,10,1<br>1,13,14,15 | 4  | P06760,P20646,P20760,Q03191                                                                                                                                      |
| 4945 | 1,4,5,7,8,9<br>,13,14  | 2,3,6,10,1<br>1,12,15,16 | 2  | P06760,P20646                                                                                                                                                    |
| 4946 | 1,4,5,7,8,9<br>,13,15  | 2,3,6,10,1<br>1,12,14,16 | 3  | P06760,P20646,Q9Z0V6                                                                                                                                             |
| 4947 | 1,4,5,7,8,9<br>,13,16  | 2,3,6,10,1<br>1,12,14,15 | 3  | P06760,P20646,P20760                                                                                                                                             |
| 4948 | 1,4,5,7,8,9<br>,14,15  | 2,3,6,10,1<br>1,12,13,16 | 3  | P06760,P20646,Q9Z0V6                                                                                                                                             |
| 4949 | 1,4,5,7,8,9<br>,14,16  | 2,3,6,10,1<br>1,12,13,15 | 3  | P06760,P20646,P20760                                                                                                                                             |
| 4950 | 1,4,5,7,8,9<br>,15,16  | 2,3,6,10,1<br>1,12,13,14 | 5  | P06760,P20646,P20760,P49134,Q9Z0V6                                                                                                                               |
| 4951 | 1,4,5,7,8,1<br>0,11,12 | 2,3,6,9,13,<br>14,15,16  | 11 | P02780,P04905,P06760,P22282,P27590,P36374,P47967,P49134,P97840,Q5I0D1,Q63493                                                                                     |
| 4952 | 1,4,5,7,8,1<br>0,11,13 | 2,3,6,9,12,<br>14,15,16  | 8  | P02780,P06760,P22282,P36374,P47967,P97840,Q4G075,Q63493                                                                                                          |

|      |                        |                         |    |                                                                                                                                                                                       |
|------|------------------------|-------------------------|----|---------------------------------------------------------------------------------------------------------------------------------------------------------------------------------------|
| 4953 | 1,4,5,7,8,1<br>0,11,14 | 2,3,6,9,12,<br>13,15,16 | 6  | P06760,Q4G075,Q63493,Q6B345,Q6P6Q2,Q99041                                                                                                                                             |
| 4954 | 1,4,5,7,8,1<br>0,11,15 | 2,3,6,9,12,<br>13,14,16 | 12 | P06760,P20646,P36374,P49134,Q4FZU2,Q63493,Q6IFU8,Q6IFW6,Q6IMF3,Q6P6Q2,Q8CJ52,Q9Z0V6                                                                                                   |
| 4955 | 1,4,5,7,8,1<br>0,11,16 | 2,3,6,9,12,<br>13,14,15 | 22 | P02780,P02781,P02782,P04905,P06760,P07647,P08010,P08723,P09456,P0C0A9,P20646,P22282,P22283,P30120,P36374,P49134,Q4FZU2,Q4G075,Q5M8C6,Q63493,Q6P6Q2,Q9JHB9                             |
| 4956 | 1,4,5,7,8,1<br>0,12,13 | 2,3,6,9,11,<br>14,15,16 | 3  | P47967,P97840,Q9Z1F2                                                                                                                                                                  |
| 4957 | 1,4,5,7,8,1<br>0,12,14 | 2,3,6,9,11,<br>13,15,16 | 2  | Q5RLM2,Q9Z1F2                                                                                                                                                                         |
| 4958 | 1,4,5,7,8,1<br>0,12,15 | 2,3,6,9,11,<br>13,14,16 | 4  | P0DMW0;P0DMW1,P10758,Q9Z0V6,Q9Z1F2                                                                                                                                                    |
| 4959 | 1,4,5,7,8,1<br>0,12,16 | 2,3,6,9,11,<br>13,14,15 | 3  | O88267,P0DMW0;P0DMW1,P97840                                                                                                                                                           |
| 4960 | 1,4,5,7,8,1<br>0,13,14 | 2,3,6,9,11,<br>12,15,16 | 2  | Q99MH3,Q9Z1F2                                                                                                                                                                         |
| 4961 | 1,4,5,7,8,1<br>0,13,15 | 2,3,6,9,11,<br>12,14,16 | 4  | P36860,Q63618,Q9Z0V6,Q9Z1F2                                                                                                                                                           |
| 4962 | 1,4,5,7,8,1<br>0,13,16 | 2,3,6,9,11,<br>12,14,15 | 4  | O35077,O70257,Q8R431,Q99MH3                                                                                                                                                           |
| 4963 | 1,4,5,7,8,1<br>0,14,15 | 2,3,6,9,11,<br>12,13,16 | 3  | P20646,P54921,Q9Z1F2                                                                                                                                                                  |
| 4964 | 1,4,5,7,8,1<br>0,14,16 | 2,3,6,9,11,<br>12,13,15 | 5  | O35077,P20646,P20760,P57113,Q99MH3                                                                                                                                                    |
| 4965 | 1,4,5,7,8,1<br>0,15,16 | 2,3,6,9,11,<br>12,13,14 | 11 | O35077,O88267,P19468,P20646,P48508,Q03248,Q63270,Q63424,Q64093,Q8R431,Q9Z0V6                                                                                                          |
| 4966 | 1,4,5,7,8,1<br>1,12,13 | 2,3,6,9,10,<br>14,15,16 | 17 | P02780,P02781,P02782,P06760,P22273,P22282,P22283,P36374,P40241,P47967,P97840,Q4G075,Q5I0D1,Q5M8C6,Q63493,Q66H69,Q811M5                                                                |
| 4967 | 1,4,5,7,8,1<br>1,12,14 | 2,3,6,9,10,<br>13,15,16 | 10 | P02780,P06760,P19218,P22282,P36374,Q4G075,Q5M8C6,Q63493,Q6P6Q2,Q811M5                                                                                                                 |
| 4968 | 1,4,5,7,8,1<br>1,12,15 | 2,3,6,9,10,<br>13,14,16 | 14 | P02780,P06760,P22282,P36374,P40241,P97840,Q4FZU2,Q63493,Q6IFU8,Q6IFW6,Q6IG02,Q6IMF3,Q6P6Q2,Q8CJ52                                                                                     |
| 4969 | 1,4,5,7,8,1<br>1,12,16 | 2,3,6,9,10,<br>13,14,15 | 26 | O35547,P02780,P02781,P02782,P04905,P06760,P07647,P08010,P08723,P09456,P0C0A9,P22273,P22282,P22283,P30120,P36374,P40241,P46462,P60905,P97840,Q4FZU2,Q4G075,Q5M8C6,Q63493,Q6P6Q2,Q9JHB9 |
| 4970 | 1,4,5,7,8,1<br>1,13,14 | 2,3,6,9,10,<br>12,15,16 | 13 | B0BNN3,O54728,P02780,P02782,P06760,P22282,P36374,Q4G075,Q63493,Q6P6Q2,Q811M5,Q99041,Q99MH3                                                                                            |
| 4971 | 1,4,5,7,8,1<br>1,13,15 | 2,3,6,9,10,<br>12,14,16 | 12 | P06760,P22282,P36374,Q4FZU2,Q4G075,Q63493,Q6IFU8,Q6IFW6,Q6IG02,Q6IMF3,Q6P6Q2,Q8CJ52                                                                                                   |

|      |                        |                         |                                                                                                                                                                                                                              |
|------|------------------------|-------------------------|------------------------------------------------------------------------------------------------------------------------------------------------------------------------------------------------------------------------------|
| 4972 | 1,4,5,7,8,1<br>1,13,16 | 2,3,6,9,10,<br>12,14,15 | O35547,P02780,P02781,P02782,P04905,P06760,P07647,P08010,P08723,P09456,P0C0A9,P2227<br>28 3,P22282,P22283,P24368,P30120,P36374,P40241,P46462,P60905,Q4FZU2,Q4G075,Q5M8C6,Q<br>63493,Q6P6Q2,Q99041,Q99MH3,Q9JHB9               |
| 4973 | 1,4,5,7,8,1<br>1,14,15 | 2,3,6,9,10,<br>12,13,16 | 12 P06760,P08649,P36374,Q4FZU2,Q4G075,Q63493,Q6IFU8,Q6IFW6,Q6IG02,Q6IMF3,Q6P6Q2,Q8<br>CJ52                                                                                                                                   |
| 4974 | 1,4,5,7,8,1<br>1,14,16 | 2,3,6,9,10,<br>12,13,15 | O54728,P02780,P02781,P02782,P04905,P06760,P07647,P08010,P08649,P08723,P09456,P0C0A<br>26 9,P22282,P22283,P30120,P36374,P46462,Q4FZU2,Q4G075,Q5M8C6,Q63493,Q6P6Q2,Q812E4,<br>Q99041,Q99MH3,Q9JHB9                             |
| 4975 | 1,4,5,7,8,1<br>1,15,16 | 2,3,6,9,10,<br>12,13,14 | P02780,P02781,P02782,P04905,P06760,P07647,P08010,P08649,P08723,P09456,P0C0A9,P2064<br>30 6,P22282,P22283,P30120,P36374,P40241,P60905,Q4FZU2,Q4G075,Q5M8C6,Q63493,Q6IFU8,Q<br>6IFW6,Q6IG02,Q6IMF3,Q6P6Q2,Q8CJ52,Q9JHB9,Q9Z0V6 |
| 4976 | 1,4,5,7,8,1<br>2,13,14 | 2,3,6,9,10,<br>11,15,16 | 3 Q811M5,Q99MH3,Q9Z2L0                                                                                                                                                                                                       |
| 4977 | 1,4,5,7,8,1<br>2,13,15 | 2,3,6,9,10,<br>11,14,16 | 2 P97840,Q9Z2L0                                                                                                                                                                                                              |
| 4978 | 1,4,5,7,8,1<br>2,13,16 | 2,3,6,9,10,<br>11,14,15 | 4 P02781,P97840,Q99MH3,Q9Z2L0                                                                                                                                                                                                |
| 4979 | 1,4,5,7,8,1<br>2,14,15 | 2,3,6,9,10,<br>11,13,16 | 1 Q9Z2L0                                                                                                                                                                                                                     |
| 4980 | 1,4,5,7,8,1<br>2,14,16 | 2,3,6,9,10,<br>11,13,15 | 1 Q99MH3                                                                                                                                                                                                                     |
| 4981 | 1,4,5,7,8,1<br>2,15,16 | 2,3,6,9,10,<br>11,13,14 | 1 P10758                                                                                                                                                                                                                     |
| 4982 | 1,4,5,7,8,1<br>3,14,15 | 2,3,6,9,10,<br>11,12,16 | 1 Q9Z2L0                                                                                                                                                                                                                     |
| 4983 | 1,4,5,7,8,1<br>3,14,16 | 2,3,6,9,10,<br>11,12,15 | 4 B0BNN3,O54728,Q99MH3,Q9Z2L0                                                                                                                                                                                                |
| 4984 | 1,4,5,7,8,1<br>3,15,16 | 2,3,6,9,10,<br>11,12,14 | 3 O35077,P20646,Q99MH3                                                                                                                                                                                                       |
| 4985 | 1,4,5,7,8,1<br>4,15,16 | 2,3,6,9,10,<br>11,12,13 | 3 O35077,P20646,Q99MH3                                                                                                                                                                                                       |
| 4986 | 1,4,5,7,9,1<br>0,11,12 | 2,3,6,8,13,<br>14,15,16 | 2 Q03191,Q62761;Q62762;Q62763                                                                                                                                                                                                |
| 4987 | 1,4,5,7,9,1<br>0,11,13 | 2,3,6,8,12,<br>14,15,16 | 0                                                                                                                                                                                                                            |
| 4988 | 1,4,5,7,9,1<br>0,11,14 | 2,3,6,8,12,<br>13,15,16 | 0                                                                                                                                                                                                                            |
| 4989 | 1,4,5,7,9,1<br>0,11,15 | 2,3,6,8,12,<br>13,14,16 | 0                                                                                                                                                                                                                            |
| 4990 | 1,4,5,7,9,1<br>0,11,16 | 2,3,6,8,12,<br>13,14,15 | 1 P49134                                                                                                                                                                                                                     |

|      |                        |                         |                                             |
|------|------------------------|-------------------------|---------------------------------------------|
| 4991 | 1,4,5,7,9,1<br>0,12,13 | 2,3,6,8,11,<br>14,15,16 | 1 Q03191                                    |
| 4992 | 1,4,5,7,9,1<br>0,12,14 | 2,3,6,8,11,<br>13,15,16 | 1 Q03191                                    |
| 4993 | 1,4,5,7,9,1<br>0,12,15 | 2,3,6,8,11,<br>13,14,16 | 2 P10758,Q03191                             |
| 4994 | 1,4,5,7,9,1<br>0,12,16 | 2,3,6,8,11,<br>13,14,15 | 1 Q03191                                    |
| 4995 | 1,4,5,7,9,1<br>0,13,14 | 2,3,6,8,11,<br>12,15,16 | 0                                           |
| 4996 | 1,4,5,7,9,1<br>0,13,15 | 2,3,6,8,11,<br>12,14,16 | 1 Q00715                                    |
| 4997 | 1,4,5,7,9,1<br>0,13,16 | 2,3,6,8,11,<br>12,14,15 | 0                                           |
| 4998 | 1,4,5,7,9,1<br>0,14,15 | 2,3,6,8,11,<br>12,13,16 | 0                                           |
| 4999 | 1,4,5,7,9,1<br>0,14,16 | 2,3,6,8,11,<br>12,13,15 | 0                                           |
| 5000 | 1,4,5,7,9,1<br>0,15,16 | 2,3,6,8,11,<br>12,13,14 | 1 P10758                                    |
| 5001 | 1,4,5,7,9,1<br>1,12,13 | 2,3,6,8,10,<br>14,15,16 | 4 P97840,Q03191,Q5I0D1,Q62761;Q62762;Q62763 |
| 5002 | 1,4,5,7,9,1<br>1,12,14 | 2,3,6,8,10,<br>13,15,16 | 2 Q03191,Q62761;Q62762;Q62763               |
| 5003 | 1,4,5,7,9,1<br>1,12,15 | 2,3,6,8,10,<br>13,14,16 | 2 Q03191,Q62761;Q62762;Q62763               |
| 5004 | 1,4,5,7,9,1<br>1,12,16 | 2,3,6,8,10,<br>13,14,15 | 2 P63322,Q03191                             |
| 5005 | 1,4,5,7,9,1<br>1,13,14 | 2,3,6,8,10,<br>12,15,16 | 0                                           |
| 5006 | 1,4,5,7,9,1<br>1,13,15 | 2,3,6,8,10,<br>12,14,16 | 0                                           |
| 5007 | 1,4,5,7,9,1<br>1,13,16 | 2,3,6,8,10,<br>12,14,15 | 2 Q9R168,Q9Z0J6                             |
| 5008 | 1,4,5,7,9,1<br>1,14,15 | 2,3,6,8,10,<br>12,13,16 | 2 P02625,Q8CJ52                             |
| 5009 | 1,4,5,7,9,1<br>1,14,16 | 2,3,6,8,10,<br>12,13,15 | 1 Q9R168                                    |
| 5010 | 1,4,5,7,9,1<br>1,15,16 | 2,3,6,8,10,<br>12,13,14 | 1 Q8CJ52                                    |

|      |                         |                         |                               |
|------|-------------------------|-------------------------|-------------------------------|
| 5011 | 1,4,5,7,9,1<br>2,13,14  | 2,3,6,8,10,<br>11,15,16 | 1 Q03191                      |
| 5012 | 1,4,5,7,9,1<br>2,13,15  | 2,3,6,8,10,<br>11,14,16 | 1 Q03191                      |
| 5013 | 1,4,5,7,9,1<br>2,13,16  | 2,3,6,8,10,<br>11,14,15 | 1 Q03191                      |
| 5014 | 1,4,5,7,9,1<br>2,14,15  | 2,3,6,8,10,<br>11,13,16 | 0                             |
| 5015 | 1,4,5,7,9,1<br>2,14,16  | 2,3,6,8,10,<br>11,13,15 | 2 Q03191,Q68G31               |
| 5016 | 1,4,5,7,9,1<br>2,15,16  | 2,3,6,8,10,<br>11,13,14 | 3 P10758,Q03191,Q68G31        |
| 5017 | 1,4,5,7,9,1<br>3,14,15  | 2,3,6,8,10,<br>11,12,16 | 2 P02625,Q00715               |
| 5018 | 1,4,5,7,9,1<br>3,14,16  | 2,3,6,8,10,<br>11,12,15 | 2 Q99MH3,Q9R168               |
| 5019 | 1,4,5,7,9,1<br>3,15,16  | 2,3,6,8,10,<br>11,12,14 | 0                             |
| 5020 | 1,4,5,7,9,1<br>4,15,16  | 2,3,6,8,10,<br>11,12,13 | 0                             |
| 5021 | 1,4,5,7,10,<br>11,12,13 | 2,3,6,8,9,1<br>4,15,16  | 4 P23593,P47967,P97840,Q5I0D1 |
| 5022 | 1,4,5,7,10,<br>11,12,14 | 2,3,6,8,9,1<br>3,15,16  | 0                             |
| 5023 | 1,4,5,7,10,<br>11,12,15 | 2,3,6,8,9,1<br>3,14,16  | 1 P97840                      |
| 5024 | 1,4,5,7,10,<br>11,12,16 | 2,3,6,8,9,1<br>3,14,15  | 1 P97840                      |
| 5025 | 1,4,5,7,10,<br>11,13,14 | 2,3,6,8,9,1<br>2,15,16  | 2 P36376,Q99MH3               |
| 5026 | 1,4,5,7,10,<br>11,13,15 | 2,3,6,8,9,1<br>2,14,16  | 1 P97840                      |
| 5027 | 1,4,5,7,10,<br>11,13,16 | 2,3,6,8,9,1<br>2,14,15  | 3 P36376,P97840,Q99MH3        |
| 5028 | 1,4,5,7,10,<br>11,14,15 | 2,3,6,8,9,1<br>2,13,16  | 0                             |
| 5029 | 1,4,5,7,10,<br>11,14,16 | 2,3,6,8,9,1<br>2,13,15  | 2 P36376,Q99MH3               |
| 5030 | 1,4,5,7,10,<br>11,15,16 | 2,3,6,8,9,1<br>2,13,14  | 4 P17988,Q4FZU2,Q6P6Q2,Q8CJ52 |



|      |                                             |                                      |
|------|---------------------------------------------|--------------------------------------|
| 5031 | 1,4,5,7,10, 2,3,6,8,9,1<br>12,13,14 1,15,16 | 2 Q6P6S4,Q99MH3                      |
| 5032 | 1,4,5,7,10, 2,3,6,8,9,1<br>12,13,15 1,14,16 | 2 P10758,P97840                      |
| 5033 | 1,4,5,7,10, 2,3,6,8,9,1<br>12,13,16 1,14,15 | 3 P97840,Q6P6S4,Q99MH3               |
| 5034 | 1,4,5,7,10, 2,3,6,8,9,1<br>12,14,15 1,13,16 | 0                                    |
| 5035 | 1,4,5,7,10, 2,3,6,8,9,1<br>12,14,16 1,13,15 | 2 Q6P6S4,Q99MH3                      |
| 5036 | 1,4,5,7,10, 2,3,6,8,9,1<br>12,15,16 1,13,14 | 3 P0DMW0;P0DMW1,P10758,P97840        |
| 5037 | 1,4,5,7,10, 2,3,6,8,9,1<br>13,14,15 1,12,16 | 0                                    |
| 5038 | 1,4,5,7,10, 2,3,6,8,9,1<br>13,14,16 1,12,15 | 4 P09527,P36376,Q6P6S4,Q99MH3        |
| 5039 | 1,4,5,7,10, 2,3,6,8,9,1<br>13,15,16 1,12,14 | 3 P09527,P11883,Q99MH3               |
| 5040 | 1,4,5,7,10, 2,3,6,8,9,1<br>14,15,16 1,12,13 | 3 P09527,Q99MH3,Q9QYP1               |
| 5041 | 1,4,5,7,11, 2,3,6,8,9,1<br>12,13,14 0,15,16 | 3 Q5I0D1,Q811M5,Q99MH3               |
| 5042 | 1,4,5,7,11, 2,3,6,8,9,1<br>12,13,15 0,14,16 | 1 P97840                             |
| 5043 | 1,4,5,7,11, 2,3,6,8,9,1<br>12,13,16 0,14,15 | 4 P36374,P47967,P97840,Q99MH3        |
| 5044 | 1,4,5,7,11, 2,3,6,8,9,1<br>12,14,15 0,13,16 | 0                                    |
| 5045 | 1,4,5,7,11, 2,3,6,8,9,1<br>12,14,16 0,13,15 | 1 Q99MH3                             |
| 5046 | 1,4,5,7,11, 2,3,6,8,9,1<br>12,15,16 0,13,14 | 5 P36374,P97840,Q4FZU2,Q6P6Q2,Q8CJ52 |
| 5047 | 1,4,5,7,11, 2,3,6,8,9,1<br>13,14,15 0,12,16 | 0                                    |
| 5048 | 1,4,5,7,11, 2,3,6,8,9,1<br>13,14,16 0,12,15 | 3 O54728,P36376,Q99MH3               |
| 5049 | 1,4,5,7,11, 2,3,6,8,9,1<br>13,15,16 0,12,14 | 4 Q4FZU2,Q6P6Q2,Q8CJ52,Q99MH3        |
| 5050 | 1,4,5,7,11, 2,3,6,8,9,1<br>14,15,16 0,12,13 | 5 P17559,Q4FZU2,Q6P6Q2,Q8CJ52,Q99MH3 |

|      |                                             |                                                    |
|------|---------------------------------------------|----------------------------------------------------|
| 5051 | 1,4,5,7,12, 2,3,6,8,9,1<br>13,14,15 0,11,16 | 2 Q6P6S4,Q9Z2L0                                    |
| 5052 | 1,4,5,7,12, 2,3,6,8,9,1<br>13,14,16 0,11,15 | 2 Q6P6S4,Q99MH3                                    |
| 5053 | 1,4,5,7,12, 2,3,6,8,9,1<br>13,15,16 0,11,14 | 3 P10758,P97840,Q99MH3                             |
| 5054 | 1,4,5,7,12, 2,3,6,8,9,1<br>14,15,16 0,11,13 | 1 Q99MH3                                           |
| 5055 | 1,4,5,7,13, 2,3,6,8,9,1<br>14,15,16 0,11,12 | 2 Q6P6S4,Q99MH3                                    |
| 5056 | 1,4,5,8,9,1 2,3,6,7,13,<br>0,11,12 14,15,16 | 4 P01835,P49134,Q03191,Q62714                      |
| 5057 | 1,4,5,8,9,1 2,3,6,7,12,<br>0,11,13 14,15,16 | 0                                                  |
| 5058 | 1,4,5,8,9,1 2,3,6,7,12,<br>0,11,14 13,15,16 | 1 P01835                                           |
| 5059 | 1,4,5,8,9,1 2,3,6,7,12,<br>0,11,15 13,14,16 | 7 P01835,P49134,Q4FZU2,Q6IFU8,Q6IFW6,Q6IMF3,Q6P6Q2 |
| 5060 | 1,4,5,8,9,1 2,3,6,7,12,<br>0,11,16 13,14,15 | 4 O88797,P01835,P49134,Q6AY61                      |
| 5061 | 1,4,5,8,9,1 2,3,6,7,11,<br>0,12,13 14,15,16 | 1 Q03191                                           |
| 5062 | 1,4,5,8,9,1 2,3,6,7,11,<br>0,12,14 13,15,16 | 0                                                  |
| 5063 | 1,4,5,8,9,1 2,3,6,7,11,<br>0,12,15 13,14,16 | 0                                                  |
| 5064 | 1,4,5,8,9,1 2,3,6,7,11,<br>0,12,16 13,14,15 | 0                                                  |
| 5065 | 1,4,5,8,9,1 2,3,6,7,11,<br>0,13,14 12,15,16 | 0                                                  |
| 5066 | 1,4,5,8,9,1 2,3,6,7,11,<br>0,13,15 12,14,16 | 1 Q00715                                           |
| 5067 | 1,4,5,8,9,1 2,3,6,7,11,<br>0,13,16 12,14,15 | 0                                                  |
| 5068 | 1,4,5,8,9,1 2,3,6,7,11,<br>0,14,15 12,13,16 | 1 P05369                                           |
| 5069 | 1,4,5,8,9,1 2,3,6,7,11,<br>0,14,16 12,13,15 | 1 P20760                                           |
| 5070 | 1,4,5,8,9,1 2,3,6,7,11,<br>0,15,16 12,13,14 | 0                                                  |

|      |                        |                         |   |                                                         |
|------|------------------------|-------------------------|---|---------------------------------------------------------|
| 5071 | 1,4,5,8,9,1<br>1,12,13 | 2,3,6,7,10,<br>14,15,16 | 6 | P18297,P20766,P60905,P63095,Q03191,Q5RKI1               |
| 5072 | 1,4,5,8,9,1<br>1,12,14 | 2,3,6,7,10,<br>13,15,16 | 7 | P01835,P18297,P20766,P63095,Q03191,Q5RKI1,Q6Q7Y5        |
| 5073 | 1,4,5,8,9,1<br>1,12,15 | 2,3,6,7,10,<br>13,14,16 | 8 | P01835,P20766,Q03191,Q4FZU2,Q6IFU8,Q6IFW6,Q6IMF3,Q6P6Q2 |
| 5074 | 1,4,5,8,9,1<br>1,12,16 | 2,3,6,7,10,<br>13,14,15 | 7 | O88797,P01835,P04905,P36374,P60905,Q03191,Q5RKI1        |
| 5075 | 1,4,5,8,9,1<br>1,13,14 | 2,3,6,7,10,<br>12,15,16 | 3 | O54728,P20766,Q5RKI1                                    |
| 5076 | 1,4,5,8,9,1<br>1,13,15 | 2,3,6,7,10,<br>12,14,16 | 5 | P20766,Q4FZU2,Q6IFU8,Q6IMF3,Q6P6Q2                      |
| 5077 | 1,4,5,8,9,1<br>1,13,16 | 2,3,6,7,10,<br>12,14,15 | 5 | P02782,P30120,P60905,Q5RKI1,Q6AY61                      |
| 5078 | 1,4,5,8,9,1<br>1,14,15 | 2,3,6,7,10,<br>12,13,16 | 6 | P20766,Q4FZU2,Q6IFU8,Q6IFW6,Q6IMF3,Q6P6Q2               |
| 5079 | 1,4,5,8,9,1<br>1,14,16 | 2,3,6,7,10,<br>12,13,15 | 7 | O54728,O88797,P20766,P60905,Q5RKI1,Q6AY61,Q812E4        |
| 5080 | 1,4,5,8,9,1<br>1,15,16 | 2,3,6,7,10,<br>12,13,14 | 8 | P01835,P49134,P60905,Q4FZU2,Q6IFU8,Q6IFW6,Q6IMF3,Q6P6Q2 |
| 5081 | 1,4,5,8,9,1<br>2,13,14 | 2,3,6,7,10,<br>11,15,16 | 2 | P20766,Q5RKI1                                           |
| 5082 | 1,4,5,8,9,1<br>2,13,15 | 2,3,6,7,10,<br>11,14,16 | 1 | P20766                                                  |
| 5083 | 1,4,5,8,9,1<br>2,13,16 | 2,3,6,7,10,<br>11,14,15 | 2 | P20766,Q5RKI1                                           |
| 5084 | 1,4,5,8,9,1<br>2,14,15 | 2,3,6,7,10,<br>11,13,16 | 1 | P20766                                                  |
| 5085 | 1,4,5,8,9,1<br>2,14,16 | 2,3,6,7,10,<br>11,13,15 | 2 | P20766,Q5RKI1                                           |
| 5086 | 1,4,5,8,9,1<br>2,15,16 | 2,3,6,7,10,<br>11,13,14 | 0 |                                                         |
| 5087 | 1,4,5,8,9,1<br>3,14,15 | 2,3,6,7,10,<br>11,12,16 | 2 | P20766,Q00715                                           |
| 5088 | 1,4,5,8,9,1<br>3,14,16 | 2,3,6,7,10,<br>11,12,15 | 3 | O54728,P20766,Q5RKI1                                    |
| 5089 | 1,4,5,8,9,1<br>3,15,16 | 2,3,6,7,10,<br>11,12,14 | 1 | P20766                                                  |
| 5090 | 1,4,5,8,9,1<br>4,15,16 | 2,3,6,7,10,<br>11,12,13 | 3 | P20766,P23593,P47967                                    |

|      |                                             |                                      |
|------|---------------------------------------------|--------------------------------------|
| 5091 | 1,4,5,8,10, 2,3,6,7,9,1<br>11,12,13 4,15,16 | 1 Q5I0D1                             |
| 5092 | 1,4,5,8,10, 2,3,6,7,9,1<br>11,12,14 3,15,16 | 0                                    |
| 5093 | 1,4,5,8,10, 2,3,6,7,9,1<br>11,12,15 3,14,16 | 5 Q4FZU2,Q6IFU8,Q6IFW6,Q6IMF3,Q6P6Q2 |
| 5094 | 1,4,5,8,10, 2,3,6,7,9,1<br>11,12,16 3,14,15 | 3 P04905,P0DMW0;P0DMW1,P36374        |
| 5095 | 1,4,5,8,10, 2,3,6,7,9,1<br>11,13,14 2,15,16 | 1 O54728                             |
| 5096 | 1,4,5,8,10, 2,3,6,7,9,1<br>11,13,15 2,14,16 | 5 Q4FZU2,Q6IFU8,Q6IFW6,Q6IMF3,Q6P6Q2 |
| 5097 | 1,4,5,8,10, 2,3,6,7,9,1<br>11,13,16 2,14,15 | 2 P02782,P30120                      |
| 5098 | 1,4,5,8,10, 2,3,6,7,9,1<br>11,14,15 2,13,16 | 5 Q4FZU2,Q6IFU8,Q6IFW6,Q6IMF3,Q6P6Q2 |
| 5099 | 1,4,5,8,10, 2,3,6,7,9,1<br>11,14,16 2,13,15 | 1 O54728                             |
| 5100 | 1,4,5,8,10, 2,3,6,7,9,1<br>11,15,16 2,13,14 | 5 Q4FZU2,Q6IFU8,Q6IFW6,Q6IMF3,Q6P6Q2 |
| 5101 | 1,4,5,8,10, 2,3,6,7,9,1<br>12,13,14 1,15,16 | 1 P35280                             |
| 5102 | 1,4,5,8,10, 2,3,6,7,9,1<br>12,13,15 1,14,16 | 0                                    |
| 5103 | 1,4,5,8,10, 2,3,6,7,9,1<br>12,13,16 1,14,15 | 2 P0DMW0;P0DMW1,P35280               |
| 5104 | 1,4,5,8,10, 2,3,6,7,9,1<br>12,14,15 1,13,16 | 1 P54921                             |
| 5105 | 1,4,5,8,10, 2,3,6,7,9,1<br>12,14,16 1,13,15 | 1 P35280                             |
| 5106 | 1,4,5,8,10, 2,3,6,7,9,1<br>12,15,16 1,13,14 | 2 P0DMW0;P0DMW1,P10758               |
| 5107 | 1,4,5,8,10, 2,3,6,7,9,1<br>13,14,15 1,12,16 | 0                                    |
| 5108 | 1,4,5,8,10, 2,3,6,7,9,1<br>13,14,16 1,12,15 | 3 O54728,P35280,Q99MH3               |
| 5109 | 1,4,5,8,10, 2,3,6,7,9,1<br>13,15,16 1,12,14 | 1 O35077                             |
| 5110 | 1,4,5,8,10, 2,3,6,7,9,1<br>14,15,16 1,12,13 | 2 O35077,P54921                      |

|      |                                             |                                                                          |
|------|---------------------------------------------|--------------------------------------------------------------------------|
| 5111 | 1,4,5,8,11, 2,3,6,7,9,1<br>12,13,14 0,15,16 | 5 O54728,P20766,P23739,Q5RKI1,Q811M5                                     |
| 5112 | 1,4,5,8,11, 2,3,6,7,9,1<br>12,13,15 0,14,16 | 7 P20766,Q4FZU2,Q6IFU8,Q6IFW6,Q6IG02,Q6IMF3,Q6P6Q2                       |
| 5113 | 1,4,5,8,11, 2,3,6,7,9,1<br>12,13,16 0,14,15 | 6 P02782,P20766,P30120,P36374,P60905,Q5RKI1                              |
| 5114 | 1,4,5,8,11, 2,3,6,7,9,1<br>12,14,15 0,13,16 | 6 P20766,Q4FZU2,Q6IFU8,Q6IFW6,Q6IMF3,Q6P6Q2                              |
| 5115 | 1,4,5,8,11, 2,3,6,7,9,1<br>12,14,16 0,13,15 | 7 O54728,P02782,P04905,P20766,P36374,Q5RKI1,Q99MH3                       |
| 5116 | 1,4,5,8,11, 2,3,6,7,9,1<br>12,15,16 0,13,14 | 7 P36374,Q4FZU2,Q6IFU8,Q6IFW6,Q6IG02,Q6IMF3,Q6P6Q2                       |
| 5117 | 1,4,5,8,11, 2,3,6,7,9,1<br>13,14,15 0,12,16 | 9 O54728,P20766,P23739,Q4FZU2,Q6IFU8,Q6IFW6,Q6IG02,Q6IMF3,Q6P6Q2         |
| 5118 | 1,4,5,8,11, 2,3,6,7,9,1<br>13,14,16 0,12,15 | 7 O54728,P02782,P20766,P30120,P60905,Q5RKI1,Q99MH3                       |
| 5119 | 1,4,5,8,11, 2,3,6,7,9,1<br>13,15,16 0,12,14 | 10 P02782,P20766,P30120,P60905,Q4FZU2,Q6IFU8,Q6IFW6,Q6IG02,Q6IMF3,Q6P6Q2 |
| 5120 | 1,4,5,8,11, 2,3,6,7,9,1<br>14,15,16 0,12,13 | 8 O54728,P20766,Q4FZU2,Q6IFU8,Q6IFW6,Q6IG02,Q6IMF3,Q6P6Q2                |
| 5121 | 1,4,5,8,12, 2,3,6,7,9,1<br>13,14,15 0,11,16 | 2 P20766,P23739                                                          |
| 5122 | 1,4,5,8,12, 2,3,6,7,9,1<br>13,14,16 0,11,15 | 5 O54728,P20766,P35280,Q5RKI1,Q99MH3                                     |
| 5123 | 1,4,5,8,12, 2,3,6,7,9,1<br>13,15,16 0,11,14 | 1 P20766                                                                 |
| 5124 | 1,4,5,8,12, 2,3,6,7,9,1<br>14,15,16 0,11,13 | 1 P20766                                                                 |
| 5125 | 1,4,5,8,13, 2,3,6,7,9,1<br>14,15,16 0,11,12 | 3 O54728,P20766,Q99MH3                                                   |
| 5126 | 1,4,5,9,10, 2,3,6,7,8,1<br>11,12,13 4,15,16 | 4 B0LT89,Q03191,Q62714,Q62761;Q62762;Q62763                              |
| 5127 | 1,4,5,9,10, 2,3,6,7,8,1<br>11,12,14 3,15,16 | 3 Q03191,Q62714,Q62761;Q62762;Q62763                                     |
| 5128 | 1,4,5,9,10, 2,3,6,7,8,1<br>11,12,15 3,14,16 | 3 Q03191,Q62714,Q62761;Q62762;Q62763                                     |
| 5129 | 1,4,5,9,10, 2,3,6,7,8,1<br>11,12,16 3,14,15 | 2 Q03191,Q62714                                                          |
| 5130 | 1,4,5,9,10, 2,3,6,7,8,1<br>11,13,14 2,15,16 | 0                                                                        |

|      |                                             |                                                                                                                                                                                                                                                                       |
|------|---------------------------------------------|-----------------------------------------------------------------------------------------------------------------------------------------------------------------------------------------------------------------------------------------------------------------------|
| 5131 | 1,4,5,9,10, 2,3,6,7,8,1<br>11,13,15 2,14,16 | 0                                                                                                                                                                                                                                                                     |
| 5132 | 1,4,5,9,10, 2,3,6,7,8,1<br>11,13,16 2,14,15 | 0                                                                                                                                                                                                                                                                     |
| 5133 | 1,4,5,9,10, 2,3,6,7,8,1<br>11,14,15 2,13,16 | 0                                                                                                                                                                                                                                                                     |
| 5134 | 1,4,5,9,10, 2,3,6,7,8,1<br>11,14,16 2,13,15 | 0                                                                                                                                                                                                                                                                     |
| 5135 | 1,4,5,9,10, 2,3,6,7,8,1<br>11,15,16 2,13,14 | 0                                                                                                                                                                                                                                                                     |
| 5136 | 1,4,5,9,10, 2,3,6,7,8,1<br>12,13,14 1,15,16 | 3 P50280,Q03191,Q9QZK9                                                                                                                                                                                                                                                |
| 5137 | 1,4,5,9,10, 2,3,6,7,8,1<br>12,13,15 1,14,16 | 3 P50280,Q00715,Q03191                                                                                                                                                                                                                                                |
| 5138 | 1,4,5,9,10, 2,3,6,7,8,1<br>12,13,16 1,14,15 | 2 P50280,Q03191                                                                                                                                                                                                                                                       |
| 5139 | 1,4,5,9,10, 2,3,6,7,8,1<br>12,14,15 1,13,16 | 3 P09456,P30120,Q00715                                                                                                                                                                                                                                                |
| 5140 | 1,4,5,9,10, 2,3,6,7,8,1<br>12,14,16 1,13,15 | 1 Q03191                                                                                                                                                                                                                                                              |
| 5141 | 1,4,5,9,10, 2,3,6,7,8,1<br>12,15,16 1,13,14 | 1 P10758                                                                                                                                                                                                                                                              |
| 5142 | 1,4,5,9,10, 2,3,6,7,8,1<br>13,14,15 1,12,16 | 3 P12020,P62804,Q00715                                                                                                                                                                                                                                                |
| 5143 | 1,4,5,9,10, 2,3,6,7,8,1<br>13,14,16 1,12,15 | 1 P12020                                                                                                                                                                                                                                                              |
| 5144 | 1,4,5,9,10, 2,3,6,7,8,1<br>13,15,16 1,12,14 | 3 P11883,P12020,Q00715                                                                                                                                                                                                                                                |
| 5145 | 1,4,5,9,10, 2,3,6,7,8,1<br>14,15,16 1,12,13 | 2 P12020,P47967                                                                                                                                                                                                                                                       |
| 5146 | 1,4,5,9,11, 2,3,6,7,8,1<br>12,13,14 0,15,16 | 34 B0LT89,O70377,O70594,O88339;Q4V882,P19468,P20766,P29975,P38918,P46844,P48508,P51907,P53790,P57113,P97605,Q03191,Q03248,Q05175,Q3T1J9,Q3ZAV1,Q5I0E9,Q5M7T9,Q5RKI1,Q62761;Q62762;Q62763,Q63270,Q63424,Q63598,Q64093,Q6AY41,Q6Q0N1,Q80W57,Q923S2,Q9R1T5,Q9WTW7,Q9Z0W7 |
| 5147 | 1,4,5,9,11, 2,3,6,7,8,1<br>12,13,15 0,14,16 | 8 P20766,P46844,P53790,P57113,Q03191,Q05175,Q62761;Q62762;Q62763,Q923S2                                                                                                                                                                                               |
| 5148 | 1,4,5,9,11, 2,3,6,7,8,1<br>12,13,16 0,14,15 | 8 O70377,O88339;Q4V882,P20766,P54921,Q03191,Q05175,Q5RKI1,Q62714                                                                                                                                                                                                      |
| 5149 | 1,4,5,9,11, 2,3,6,7,8,1<br>12,14,15 0,13,16 | 18 O70257,O70594,P02631,P19468,P20766,P28570,P46844,P53790,P57113,Q03191,Q3ZAV1,Q62761;Q62762;Q62763,Q63424,Q63598,Q63618,Q64093,Q6AY41,Q9WTW7                                                                                                                        |

|      |                                             |                                                                                               |
|------|---------------------------------------------|-----------------------------------------------------------------------------------------------|
| 5150 | 1,4,5,9,11, 2,3,6,7,8,1<br>12,14,16 0,13,15 | 12 O70377,O70594,O88339;Q4V882,P02631,P20766,P51907,Q03191,Q05175,Q5RKI1,Q62714,Q63598,Q63618 |
| 5151 | 1,4,5,9,11, 2,3,6,7,8,1<br>12,15,16 0,13,14 | 5 P02631,P20766,P25809,Q03191,Q5QE79                                                          |
| 5152 | 1,4,5,9,11, 2,3,6,7,8,1<br>13,14,15 0,12,16 | 10 P02631,P0DMW0,P0DMW1,P20766,P46844,P53790,P57113,Q3ZAV1,Q63598,Q6AY41,Q9WTW7               |
| 5153 | 1,4,5,9,11, 2,3,6,7,8,1<br>13,14,16 0,12,15 | 7 O54728,P02631,P20766,Q05175,Q5RKI1,Q63598,Q9WTW7                                            |
| 5154 | 1,4,5,9,11, 2,3,6,7,8,1<br>13,15,16 0,12,14 | 4 O70417,P02631,P20766,Q5RLM2                                                                 |
| 5155 | 1,4,5,9,11, 2,3,6,7,8,1<br>14,15,16 0,12,13 | 3 P02631,P20766,Q63598                                                                        |
| 5156 | 1,4,5,9,12, 2,3,6,7,8,1<br>13,14,15 0,11,16 | 3 P20766,Q00715,Q9WTW7                                                                        |
| 5157 | 1,4,5,9,12, 2,3,6,7,8,1<br>13,14,16 0,11,15 | 3 P20766,Q03191,Q5RKI1                                                                        |
| 5158 | 1,4,5,9,12, 2,3,6,7,8,1<br>13,15,16 0,11,14 | 1 P20766                                                                                      |
| 5159 | 1,4,5,9,12, 2,3,6,7,8,1<br>14,15,16 0,11,13 | 2 P02631,P20766                                                                               |
| 5160 | 1,4,5,9,13, 2,3,6,7,8,1<br>14,15,16 0,11,12 | 4 P02631,P12020,P20766,Q00715                                                                 |
| 5161 | 1,4,5,10,1 2,3,6,7,8,9<br>1,12,13,14 ,15,16 | 1 P35280                                                                                      |
| 5162 | 1,4,5,10,1 2,3,6,7,8,9<br>1,12,13,15 ,14,16 | 1 Q5QE79                                                                                      |
| 5163 | 1,4,5,10,1 2,3,6,7,8,9<br>1,12,13,16 ,14,15 | 2 P35280,P97840                                                                               |
| 5164 | 1,4,5,10,1 2,3,6,7,8,9<br>1,12,14,15 ,13,16 | 0                                                                                             |
| 5165 | 1,4,5,10,1 2,3,6,7,8,9<br>1,12,14,16 ,13,15 | 1 P35280                                                                                      |
| 5166 | 1,4,5,10,1 2,3,6,7,8,9<br>1,12,15,16 ,13,14 | 1 Q5QE79                                                                                      |
| 5167 | 1,4,5,10,1 2,3,6,7,8,9<br>1,13,14,15 ,12,16 | 0                                                                                             |
| 5168 | 1,4,5,10,1 2,3,6,7,8,9<br>1,13,14,16 ,12,15 | 4 O54728,P35280,P36376,Q99MH3                                                                 |
| 5169 | 1,4,5,10,1 2,3,6,7,8,9<br>1,13,15,16 ,12,14 | 2 O70417,Q5QE79                                                                               |

|      |                          |                          |                                                                                                                                                                                                                                                   |
|------|--------------------------|--------------------------|---------------------------------------------------------------------------------------------------------------------------------------------------------------------------------------------------------------------------------------------------|
| 5170 | 1,4,5,10,1<br>1,14,15,16 | 2,3,6,7,8,9<br>,12,13    | 0                                                                                                                                                                                                                                                 |
| 5171 | 1,4,5,10,1<br>2,13,14,15 | 2,3,6,7,8,9<br>,11,16    | 2 P35280,Q6P6S4                                                                                                                                                                                                                                   |
| 5172 | 1,4,5,10,1<br>2,13,14,16 | 2,3,6,7,8,9<br>,11,15    | 3 P35280,Q6P6S4,Q99MH3                                                                                                                                                                                                                            |
| 5173 | 1,4,5,10,1<br>2,13,15,16 | 2,3,6,7,8,9<br>,11,14    | 4 P10758,P35280,Q5QE79,Q63751                                                                                                                                                                                                                     |
| 5174 | 1,4,5,10,1<br>2,14,15,16 | 2,3,6,7,8,9<br>,11,13    | 2 P35280,Q6P6S4                                                                                                                                                                                                                                   |
| 5175 | 1,4,5,10,1<br>3,14,15,16 | 2,3,6,7,8,9<br>,11,12    | 4 P35280,P70709,Q6P6S4,Q99MH3                                                                                                                                                                                                                     |
| 5176 | 1,4,5,11,1<br>2,13,14,15 | 2,3,6,7,8,9<br>,10,16    | 4 P02631,P20766,P23739,P70545                                                                                                                                                                                                                     |
| 5177 | 1,4,5,11,1<br>2,13,14,16 | 2,3,6,7,8,9<br>,10,15    | 9 O54728,O88339;Q4V882,P20766,P23739,P35280,Q05175,Q5RKI1,Q63598,Q99MH3                                                                                                                                                                           |
| 5178 | 1,4,5,11,1<br>2,13,15,16 | 2,3,6,7,8,9<br>,10,14    | 4 O70417,P20766,P23739,Q5QE79                                                                                                                                                                                                                     |
| 5179 | 1,4,5,11,1<br>2,14,15,16 | 2,3,6,7,8,9<br>,10,13    | 2 P02631,P20766                                                                                                                                                                                                                                   |
| 5180 | 1,4,5,11,1<br>3,14,15,16 | 2,3,6,7,8,9<br>,10,12    | 5 O54728,P02631,P20766,P23739,Q99MH3                                                                                                                                                                                                              |
| 5181 | 1,4,5,12,1<br>3,14,15,16 | 2,3,6,7,8,9<br>,10,11    | 6 P20766,P23739,P35280,Q6P6R2,Q6P6S4,Q99MH3                                                                                                                                                                                                       |
| 5182 | 1,4,6,7,8,9<br>,10,11    | 2,3,5,12,1<br>3,14,15,16 | P02780,P02781,P04905,P06761,P06911,P07150,P08723,P0C0A9,P11598,P18418,P22273,P2228<br>31 2,P22283,P36374,P46462,P49134,Q5GRG2,Q5M8C6,Q63493,Q63617,Q6AY61,Q6AYR9,Q6P6R2<br>,Q6P6S4,Q812E4,Q99041,Q9JHB9,Q9JI85,Q9QW07,Q9R0T3,Q9Z1F2               |
| 5183 | 1,4,6,7,8,9<br>,10,12    | 2,3,5,11,1<br>3,14,15,16 | 6 P06761,P06911,P18418,P19629,P21674,Q9Z1F2                                                                                                                                                                                                       |
| 5184 | 1,4,6,7,8,9<br>,10,13    | 2,3,5,11,1<br>2,14,15,16 | 4 P02631,P06761,P18418,Q9Z1F2                                                                                                                                                                                                                     |
| 5185 | 1,4,6,7,8,9<br>,10,14    | 2,3,5,11,1<br>2,13,15,16 | 4 O70417,P18418,Q6P6R2,Q9Z1F2                                                                                                                                                                                                                     |
| 5186 | 1,4,6,7,8,9<br>,10,15    | 2,3,5,11,1<br>2,13,14,16 | 8 P18418,P19629,P20646,Q63474,Q63598,Q6P6R2,Q9Z0V6,Q9Z1F2                                                                                                                                                                                         |
| 5187 | 1,4,6,7,8,9<br>,10,16    | 2,3,5,11,1<br>2,13,14,15 | 7 P06761,P07647,P18418,P19629,P20646,P22006,P70545                                                                                                                                                                                                |
| 5188 | 1,4,6,7,8,9<br>,11,12    | 2,3,5,10,1<br>3,14,15,16 | P02780,P02781,P02782,P04905,P06761,P06911,P07150,P08723,P0C0A9,P11598,P12020,P2167<br>33 4,P22273,P22282,P22283,P36374,P40241,P46462,P60905,Q09326,Q5GRG2,Q5M8C6,Q63493,Q<br>63617,Q6AYR9,Q6P6S4,Q6Q7Y5,Q78P75,Q812E4,Q9JHB9,Q9JI85,Q9QW07,Q9R0T3 |



5189 1,4,6,7,8,9 2,3,5,10,1  
,11,13 2,14,15,16

5190 1,4,6,7,8,9 2,3,5,10,1  
,11,14 2,13,15,16

5191 1,4,6,7,8,9 2,3,5,10,1  
,11,15 2,13,14,16

5192 1,4,6,7,8,9 2,3,5,10,1  
,11,16 2,13,14,15

5193 1,4,6,7,8,9 2,3,5,10,1  
,12,13 1,14,15,16

5194 1,4,6,7,8,9 2,3,5,10,1  
,12,14 1,13,15,16

5195 1,4,6,7,8,9 2,3,5,10,1  
,12,15 1,13,14,16

5196 1,4,6,7,8,9 2,3,5,10,1  
,12,16 1,13,14,15

5197 1,4,6,7,8,9 2,3,5,10,1  
,13,14 1,12,15,16

5198 1,4,6,7,8,9 2,3,5,10,1  
,13,15 1,12,14,16

5199 1,4,6,7,8,9 2,3,5,10,1  
,13,16 1,12,14,15

5200 1,4,6,7,8,9 2,3,5,10,1  
,14,15 1,12,13,16

5201 1,4,6,7,8,9 2,3,5,10,1  
,14,16 1,12,13,15

5202 1,4,6,7,8,9 2,3,5,10,1  
,15,16 1,12,13,14

5203 1,4,6,7,8,1 2,3,5,9,13,  
0,11,12 14,15,16

5204 1,4,6,7,8,1 2,3,5,9,12,  
0,11,13 14,15,16

P02780,P02781,P02782,P06761,P06911,P07647,P08723,P09456,P0C0A9,P11598,P18418,P2227  
34 3,P22282,P22283,P36374,P40241,P46462,P60905,Q09326,Q5GRG2,Q5M8C6,Q62902,Q63493,Q  
63617,Q6AY61,Q6AYR9,Q6Q7Y5,Q78P75,Q812E4,Q99041,Q9JHB9,Q9JI85,Q9QW07,Q9R0T3  
P02780,P02781,P02782,P06761,P06911,P07150,P08723,P09456,P0C0A9,P11598,P12020,P2227  
33 3,P22282,P22283,P36374,P46462,P50280,P60905,Q09326,Q5GRG2,Q5M8C6,Q63493,Q63617,Q  
6AY61,Q6AYR9,Q6P6R2,Q6Q7Y5,Q78P75,Q812E4,Q99041,Q9JHB9,Q9JI85,Q9QW07  
P02780,P02781,P06761,P06911,P07150,P08723,P0C0A9,P11598,P22273,P22282,P22283,P3637  
30 4,P46462,P50280,P60905,Q5GRG2,Q5M8C6,Q63493,Q63617,Q6AY61,Q6AYR9,Q6P6R2,Q6P6S  
4,Q78P75,Q812E4,Q8CJ52,Q99041,Q9JHB9,Q9JI85,Q9QW07  
O35547,P02780,P02781,P02782,P04905,P06761,P06911,P07150,P07647,P08723,P09456,P0C0A  
9,P11598,P18418,P22006,P22273,P22282,P22283,P24368,P30120,P36374,P40241,P46462,P502  
43 80,P60905,P97523,Q5GRG2,Q5M8C6,Q62902,Q63493,Q63617,Q6AY61,Q6AYR9,Q6P6S4,Q6Q7  
Y5,Q6RUV5,Q812E4,Q8CFN2,Q99041,Q9JHB9,Q9JI85,Q9QW07,Q9R0T3  
3 P06761,P06911,Q9JI85  
4 O70417,P06761,P06911,P21674  
2 P06911,P19629  
10 P02781,P06761,P06911,P07647,P18418,P21674,P22006,P22282,Q9JHB9,Q9QW07  
3 P06761,P06911,Q5QE79  
1 P70549  
10 P02781,P02782,P06761,P07647,P18418,P22006,P22282,P22283,Q63617,Q9JI85  
1 P20646  
8 P02781,P06761,P06911,P07647,P18418,P21674,P22006,P23593  
9 P06761,P07647,P18418,P19629,P20646,P22006,P23593,Q8CJ52,Q9QW07  
P02780,P02781,P02782,P04905,P06761,P06911,P07647,P08723,P0C0A9,P11598,P12020,P1841  
30 8,P19629,P22273,P22282,P22283,P31044,P36374,P40241,P46462,Q5GRG2,Q5M8C6,Q63493,Q  
63617,Q99041,Q9JHB9,Q9JI85,Q9QW07,Q9R0T3,Q9Z1F2  
P00714,P02780,P02781,P02782,P06761,P06911,P07647,P08723,P0C0A9,P11598,P18418,P2227  
27 3,P22282,P22283,P36374,P40241,P46462,Q5GRG2,Q5M8C6,Q63493,Q63617,Q6AYR9,Q99041,  
Q9JHB9,Q9JI85,Q9R0T3,Q9Z1F2

|      |                        |                         |    |                                                                                                                                                                                                                                                                                                |
|------|------------------------|-------------------------|----|------------------------------------------------------------------------------------------------------------------------------------------------------------------------------------------------------------------------------------------------------------------------------------------------|
| 5205 | 1,4,6,7,8,1<br>0,11,14 | 2,3,5,9,12,<br>13,15,16 | 28 | P02780,P02781,P02782,P04905,P06761,P06911,P07150,P08723,P0C0A9,P11598,P12020,P18418,P19629,P22273,P22282,P22283,P36374,P46462,P50280,Q5GRG2,Q5M8C6,Q63493,Q63617,Q99041,Q9JHB9,Q9JI85,Q9QW07,Q9R0T3,Q9Z1F2                                                                                     |
| 5206 | 1,4,6,7,8,1<br>0,11,15 | 2,3,5,9,12,<br>13,14,16 | 26 | P02780,P02781,P06761,P06911,P08723,P0C0A9,P11598,P18418,P19629,P22273,P22282,P22283,P36374,P46462,P50280,Q5GRG2,Q5M8C6,Q63474,Q63493,Q63617,Q8CJ52,Q99041,Q9JHB9,Q9JI85,Q9QW07,Q9Z1F2                                                                                                          |
| 5207 | 1,4,6,7,8,1<br>0,11,16 | 2,3,5,9,12,<br>13,14,15 | 41 | O35547,O88917,P00714,P02780,P02781,P02782,P04905,P06761,P06911,P07151,P07647,P08010,P08723,P09456,P0C0A9,P11598,P15399,P18418,P19629,P22273,P22282,P22283,P24368,P30120,P36374,P40241,P46462,P50280,P60905,Q4G063,Q5GRG2,Q5M8C6,Q63493,Q63617,Q6AY61,Q812E4,Q99041,Q9JHB9,Q9JI85,Q9QW07,Q9R0T3 |
| 5208 | 1,4,6,7,8,1<br>0,12,13 | 2,3,5,9,11,<br>14,15,16 | 8  | P02631,P06761,P06911,P18418,P19629,P70549,Q9JI85,Q9Z1F2                                                                                                                                                                                                                                        |
| 5209 | 1,4,6,7,8,1<br>0,12,14 | 2,3,5,9,11,<br>13,15,16 | 6  | O70417,P06761,P06911,P18418,P57113,Q9Z1F2                                                                                                                                                                                                                                                      |
| 5210 | 1,4,6,7,8,1<br>0,12,15 | 2,3,5,9,11,<br>13,14,16 | 7  | P06911,P10758,P18418,P19629,Q63474,Q63598,Q9Z1F2                                                                                                                                                                                                                                               |
| 5211 | 1,4,6,7,8,1<br>0,12,16 | 2,3,5,9,11,<br>13,14,15 | 18 | P02781,P06761,P06911,P07151,P07647,P0DMW0,P0DMW1,P10758,P18418,P19629,P21674,P22282,P22283,P46844,P57113,Q03248,Q5M8C6,Q63598,Q9JHB9                                                                                                                                                           |
| 5212 | 1,4,6,7,8,1<br>0,13,14 | 2,3,5,9,11,<br>12,15,16 | 7  | P06761,P06911,P18418,P57113,P70549,Q9Z1F2,Q9Z2L0                                                                                                                                                                                                                                               |
| 5213 | 1,4,6,7,8,1<br>0,13,15 | 2,3,5,9,11,<br>12,14,16 | 12 | O70257,P06761,P18418,P19629,P36860,P51907,P57113,P70549,Q63474,Q63598,Q63618,Q9Z1F2                                                                                                                                                                                                            |
| 5214 | 1,4,6,7,8,1<br>0,13,16 | 2,3,5,9,11,<br>12,14,15 | 21 | O35956,O55004,O70257,P02631,P02781,P02782,P06761,P07151,P07647,P11598,P18418,P19468,P19629,P22282,P22283,P46844,P57113,Q3ZAV1,Q63424,Q63598,Q9JI85                                                                                                                                             |
| 5215 | 1,4,6,7,8,1<br>0,14,15 | 2,3,5,9,11,<br>12,13,16 | 6  | P18418,P19629,P54921,P57113,Q63474,Q9Z1F2                                                                                                                                                                                                                                                      |
| 5216 | 1,4,6,7,8,1<br>0,14,16 | 2,3,5,9,11,<br>12,13,15 | 10 | P02781,P06761,P06911,P07151,P07647,P18418,P19629,P57113,Q03248,Q99MH3                                                                                                                                                                                                                          |
| 5217 | 1,4,6,7,8,1<br>0,15,16 | 2,3,5,9,11,<br>12,13,14 | 31 | O55004,O70257,O70594,P02781,P06761,P07151,P07647,P10758,P15399,P17988,P18418,P19468,P19629,P46844,P48508,P51907,P53790,P57113,Q03248,Q05175,Q3ZAV1,Q4QQT4,Q5M7T9,Q63270,Q63424,Q63598,Q64093,Q6Q0N1,Q8R431,Q9R1T5,Q9WTW7                                                                       |
| 5218 | 1,4,6,7,8,1<br>1,12,13 | 2,3,5,9,10,<br>14,15,16 | 33 | O35547,P02780,P02781,P02782,P04905,P06761,P06911,P07647,P08723,P09456,P0C0A9,P11598,P12020,P22273,P22282,P22283,P30120,P36374,P40241,P46462,P60905,Q09326,Q5GRG2,Q5M8C6,Q63493,Q63617,Q6AYR9,Q78P75,Q99041,Q9JHB9,Q9JI85,Q9QW07,Q9R0T3                                                         |
| 5219 | 1,4,6,7,8,1<br>1,12,14 | 2,3,5,9,10,<br>13,15,16 | 34 | O35547,P02780,P02781,P02782,P04905,P06761,P06911,P07150,P07647,P08723,P0C0A9,P11598,P12020,P19218,P22273,P22282,P22283,P36374,P40241,P46462,P50280,P60905,Q09326,Q5GRG2,Q5M8C6,Q63493,Q63617,Q6AYR9,Q812E4,Q99041,Q9JHB9,Q9JI85,Q9QW07,Q9R0T3                                                  |
| 5220 | 1,4,6,7,8,1<br>1,12,15 | 2,3,5,9,10,<br>13,14,16 | 28 | P02780,P02781,P02782,P06761,P06911,P08723,P0C0A9,P11598,P12020,P19629,P22273,P22282,P22283,P36374,P40241,P46462,P50280,P60905,Q5GRG2,Q5M8C6,Q63493,Q63617,Q6AYR9,Q8CJ52,Q99041,Q9JHB9,Q9JI85,Q9QW07                                                                                            |

|      |                        |                         |    |                                                                                                                                                                                                                                                                                                                            |
|------|------------------------|-------------------------|----|----------------------------------------------------------------------------------------------------------------------------------------------------------------------------------------------------------------------------------------------------------------------------------------------------------------------------|
| 5221 | 1,4,6,7,8,1<br>1,12,16 | 2,3,5,9,10,<br>13,14,15 | 39 | O08815,O35547,P00714,P02780,P02781,P02782,P04905,P06761,P06911,P07647,P08010,P08723,P09456,P0C0A9,P11598,P12020,P18418,P22273,P22282,P22283,P24368,P30120,P36374,P40241,P46462,P50280,P60905,P97523,Q5GRG2,Q5M8C6,Q63493,Q63617,Q812E4,Q8CFN2,Q99041,Q9JHB9,Q9JI85,Q9QW07,Q9R0T3                                           |
| 5222 | 1,4,6,7,8,1<br>1,13,14 | 2,3,5,9,10,<br>12,15,16 | 33 | B0BNN3,O54728,P02780,P02781,P02782,P06761,P06911,P07647,P08723,P09456,P0C0A9,P11598,P12020,P22273,P22282,P22283,P36374,P40241,P46462,P48032,P60905,Q09326,Q4G075,Q5GRG2,Q5M8C6,Q63493,Q63617,Q6AYR9,Q78P75,Q812E4,Q99041,Q9JHB9,Q9JI85                                                                                     |
| 5223 | 1,4,6,7,8,1<br>1,13,15 | 2,3,5,9,10,<br>12,14,16 | 28 | P02780,P02781,P02782,P06761,P06911,P07647,P08723,P0C0A9,P11598,P22273,P22282,P22283,P36374,P40241,P46462,P50280,P60905,Q09326,Q5GRG2,Q5M8C6,Q63493,Q63617,Q6AYR9,Q8CJ52,Q99041,Q9JHB9,Q9JI85,Q9QW07                                                                                                                        |
| 5224 | 1,4,6,7,8,1<br>1,13,16 | 2,3,5,9,10,<br>12,14,15 | 44 | O35547,O88917,P00714,P02780,P02781,P02782,P04905,P05369,P06761,P06911,P07647,P08010,P08723,P09456,P0C0A9,P11598,P12020,P18418,P22273,P22282,P22283,P24368,P30120,P36374,P40241,P46462,P50280,P60905,P97523,Q4G063,Q5GRG2,Q5M8C6,Q62902,Q63493,Q63617,Q6AY61,Q6AYR9,Q812E4,Q8CFN2,Q99041,Q9JHB9,Q9JI85,Q9QW07,Q9R0T3        |
| 5225 | 1,4,6,7,8,1<br>1,14,15 | 2,3,5,9,10,<br>12,13,16 | 27 | P02780,P02781,P02782,P06761,P06911,P07150,P08723,P0C0A9,P11598,P12020,P22273,P22282,P22283,P36374,P46462,P50280,Q09326,Q5GRG2,Q5M8C6,Q63493,Q63617,Q6AYR9,Q8CJ52,Q99041,Q9JHB9,Q9JI85,Q9QW07                                                                                                                               |
| 5226 | 1,4,6,7,8,1<br>1,14,16 | 2,3,5,9,10,<br>12,13,15 | 45 | O35547,O54728,P02780,P02781,P02782,P04905,P06761,P06911,P07150,P07647,P08010,P08723,P09456,P0C0A9,P11598,P12020,P18418,P22006,P22273,P22282,P22283,P24368,P30120,P36374,P40241,P46462,P50280,P60905,P97523,Q4G075,Q5GRG2,Q5M8C6,Q63493,Q63617,Q6AY61,Q6AYR9,Q812E4,Q8CFN2,Q99041,Q99MH3,Q9JHB9,Q9JI85,Q9QW07,Q9QZK9,Q9R0T3 |
| 5227 | 1,4,6,7,8,1<br>1,15,16 | 2,3,5,9,10,<br>12,13,14 | 39 | O35547,P02780,P02781,P02782,P04905,P06761,P06911,P07647,P08723,P09456,P0C0A9,P11598,P18418,P19629,P22273,P22282,P22283,P24368,P30120,P36374,P40241,P46462,P50280,P60905,Q4FZU2,Q4G063,Q5GRG2,Q5M8C6,Q63493,Q63617,Q6AYR9,Q6P6Q2,Q812E4,Q8CJ52,Q99041,Q9JHB9,Q9JI85,Q9QW07,Q9QZK9                                           |
| 5228 | 1,4,6,7,8,1<br>2,13,14 | 2,3,5,9,10,<br>11,15,16 | 5  | P06761,P06911,P70549,Q9JI85,Q9Z2L0                                                                                                                                                                                                                                                                                         |
| 5229 | 1,4,6,7,8,1<br>2,13,15 | 2,3,5,9,10,<br>11,14,16 | 6  | P06761,P06911,P19629,P70549,Q9JI85,Q9Z2L0                                                                                                                                                                                                                                                                                  |
| 5230 | 1,4,6,7,8,1<br>2,13,16 | 2,3,5,9,10,<br>11,14,15 | 16 | P02780,P02781,P02782,P06761,P06911,P07647,P11598,P18418,P22282,P22283,P30120,P70549,Q5M8C6,Q9JHB9,Q9JI85,Q9Z2L0                                                                                                                                                                                                            |
| 5231 | 1,4,6,7,8,1<br>2,14,15 | 2,3,5,9,10,<br>11,13,16 | 3  | P06911,P19629,Q9Z2L0                                                                                                                                                                                                                                                                                                       |
| 5232 | 1,4,6,7,8,1<br>2,14,16 | 2,3,5,9,10,<br>11,13,15 | 12 | P02781,P02782,P06761,P06911,P07647,P21674,P22282,P22283,Q5M8C6,Q99MH3,Q9JHB9,Q9Z2L0                                                                                                                                                                                                                                        |
| 5233 | 1,4,6,7,8,1<br>2,15,16 | 2,3,5,9,10,<br>11,13,14 | 11 | P02781,P06761,P06911,P07647,P10758,P19629,P22282,P22283,Q9JHB9,Q9QW07,Q9Z2L0                                                                                                                                                                                                                                               |
| 5234 | 1,4,6,7,8,1<br>3,14,15 | 2,3,5,9,10,<br>11,12,16 | 3  | P06761,P70549,Q9Z2L0                                                                                                                                                                                                                                                                                                       |
| 5235 | 1,4,6,7,8,1<br>3,14,16 | 2,3,5,9,10,<br>11,12,15 | 15 | B0BNN3,O54728,P02781,P02782,P06761,P06911,P07647,P11598,P18418,P22282,P22283,P30120,Q99MH3,Q9JI85,Q9Z2L0                                                                                                                                                                                                                   |

|      |                        |                         |    |                                                                                     |
|------|------------------------|-------------------------|----|-------------------------------------------------------------------------------------|
| 5236 | 1,4,6,7,8,1<br>3,15,16 | 2,3,5,9,10,<br>11,12,14 | 12 | P02781,P02782,P06761,P07647,P18418,P19629,P22282,P22283,P70549,Q8CJ52,Q9JI85,Q9Z2L0 |
| 5237 | 1,4,6,7,8,1<br>4,15,16 | 2,3,5,9,10,<br>11,12,13 | 6  | P02781,P06761,P07647,P19629,Q8CJ52,Q9Z2L0                                           |
| 5238 | 1,4,6,7,9,1<br>0,11,12 | 2,3,5,8,13,<br>14,15,16 | 2  | P11598,Q63617                                                                       |
| 5239 | 1,4,6,7,9,1<br>0,11,13 | 2,3,5,8,12,<br>14,15,16 | 3  | P11598,P22283,Q63617                                                                |
| 5240 | 1,4,6,7,9,1<br>0,11,14 | 2,3,5,8,12,<br>13,15,16 | 2  | P11598,Q63617                                                                       |
| 5241 | 1,4,6,7,9,1<br>0,11,15 | 2,3,5,8,12,<br>13,14,16 | 2  | Q63617,Q8CJ52                                                                       |
| 5242 | 1,4,6,7,9,1<br>0,11,16 | 2,3,5,8,12,<br>13,14,15 | 7  | P07647,P0C0A9,P11598,P22006,P22283,Q63617,Q9JHB9                                    |
| 5243 | 1,4,6,7,9,1<br>0,12,13 | 2,3,5,8,11,<br>14,15,16 | 0  |                                                                                     |
| 5244 | 1,4,6,7,9,1<br>0,12,14 | 2,3,5,8,11,<br>13,15,16 | 0  |                                                                                     |
| 5245 | 1,4,6,7,9,1<br>0,12,15 | 2,3,5,8,11,<br>13,14,16 | 1  | P10758                                                                              |
| 5246 | 1,4,6,7,9,1<br>0,12,16 | 2,3,5,8,11,<br>13,14,15 | 3  | P10758,P21674,P22006                                                                |
| 5247 | 1,4,6,7,9,1<br>0,13,14 | 2,3,5,8,11,<br>12,15,16 | 0  |                                                                                     |
| 5248 | 1,4,6,7,9,1<br>0,13,15 | 2,3,5,8,11,<br>12,14,16 | 2  | P11883,Q00715                                                                       |
| 5249 | 1,4,6,7,9,1<br>0,13,16 | 2,3,5,8,11,<br>12,14,15 | 3  | P11883,P22006,P36376                                                                |
| 5250 | 1,4,6,7,9,1<br>0,14,15 | 2,3,5,8,11,<br>12,13,16 | 0  |                                                                                     |
| 5251 | 1,4,6,7,9,1<br>0,14,16 | 2,3,5,8,11,<br>12,13,15 | 2  | P22006,P36376                                                                       |
| 5252 | 1,4,6,7,9,1<br>0,15,16 | 2,3,5,8,11,<br>12,13,14 | 4  | P10758,P11883,P22006,Q811M5                                                         |
| 5253 | 1,4,6,7,9,1<br>1,12,13 | 2,3,5,8,10,<br>14,15,16 | 4  | P11598,P22283,Q62761;Q62762;Q62763,Q63617                                           |
| 5254 | 1,4,6,7,9,1<br>1,12,14 | 2,3,5,8,10,<br>13,15,16 | 3  | P11598,Q62761;Q62762;Q62763,Q63617                                                  |
| 5255 | 1,4,6,7,9,1<br>1,12,15 | 2,3,5,8,10,<br>13,14,16 | 4  | Q62761;Q62762;Q62763,Q63617,Q8CJ52,Q9QW07                                           |

|      |                         |                         |    |                                                                                                              |
|------|-------------------------|-------------------------|----|--------------------------------------------------------------------------------------------------------------|
| 5256 | 1,4,6,7,9,1<br>1,12,16  | 2,3,5,8,10,<br>13,14,15 | 15 | O08815,O35547,P02781,P07647,P08723,P0C0A9,P11598,P21674,P22006,P22283,P36374,P6332<br>2,Q63617,Q9JHB9,Q9QW07 |
| 5257 | 1,4,6,7,9,1<br>1,13,14  | 2,3,5,8,10,<br>12,15,16 |    | 5 P0DMW0;P0DMW1,P11598,Q63617,Q99041,Q9R168                                                                  |
| 5258 | 1,4,6,7,9,1<br>1,13,15  | 2,3,5,8,10,<br>12,14,16 |    | 3 P11598,Q63617,Q8CJ52                                                                                       |
| 5259 | 1,4,6,7,9,1<br>1,13,16  | 2,3,5,8,10,<br>12,14,15 | 14 | P00714,P02781,P02782,P07647,P08723,P0C0A9,P11598,P22006,P22283,P34901,P36376,Q6361<br>7,Q9JHB9,Q9R168        |
| 5260 | 1,4,6,7,9,1<br>1,14,15  | 2,3,5,8,10,<br>12,13,16 |    | 2 P0DMW0;P0DMW1,Q8CJ52                                                                                       |
| 5261 | 1,4,6,7,9,1<br>1,14,16  | 2,3,5,8,10,<br>12,13,15 |    | 11 P07647,P0C0A9,P11598,P22006,P22283,Q63617,Q812E4,Q99041,Q9JHB9,Q9QW07,Q9R168                              |
| 5262 | 1,4,6,7,9,1<br>1,15,16  | 2,3,5,8,10,<br>12,13,14 |    | 10 P07647,P08723,P0C0A9,P11598,P22006,P22283,Q63617,Q8CJ52,Q9JHB9,Q9QW07                                     |
| 5263 | 1,4,6,7,9,1<br>2,13,14  | 2,3,5,8,10,<br>11,15,16 |    | 0                                                                                                            |
| 5264 | 1,4,6,7,9,1<br>2,13,15  | 2,3,5,8,10,<br>11,14,16 |    | 1 P70549                                                                                                     |
| 5265 | 1,4,6,7,9,1<br>2,13,16  | 2,3,5,8,10,<br>11,14,15 |    | 1 P22006                                                                                                     |
| 5266 | 1,4,6,7,9,1<br>2,14,15  | 2,3,5,8,10,<br>11,13,16 |    | 0                                                                                                            |
| 5267 | 1,4,6,7,9,1<br>2,14,16  | 2,3,5,8,10,<br>11,13,15 |    | 2 P21674,P22006                                                                                              |
| 5268 | 1,4,6,7,9,1<br>2,15,16  | 2,3,5,8,10,<br>11,13,14 |    | 2 P10758,P22006                                                                                              |
| 5269 | 1,4,6,7,9,1<br>3,14,15  | 2,3,5,8,10,<br>11,12,16 |    | 2 P70549,Q00715                                                                                              |
| 5270 | 1,4,6,7,9,1<br>3,14,16  | 2,3,5,8,10,<br>11,12,15 |    | 4 P22006,P34901,P36376,Q9R168                                                                                |
| 5271 | 1,4,6,7,9,1<br>3,15,16  | 2,3,5,8,10,<br>11,12,14 |    | 2 P11883,P22006                                                                                              |
| 5272 | 1,4,6,7,9,1<br>4,15,16  | 2,3,5,8,10,<br>11,12,13 |    | 2 P22006,P47967                                                                                              |
| 5273 | 1,4,6,7,10,<br>11,12,13 | 2,3,5,8,9,1<br>4,15,16  |    | 4 P11598,P22283,P36376,Q63617                                                                                |
| 5274 | 1,4,6,7,10,<br>11,12,14 | 2,3,5,8,9,1<br>3,15,16  |    | 3 P11598,P22283,P36376                                                                                       |
| 5275 | 1,4,6,7,10,<br>11,12,15 | 2,3,5,8,9,1<br>3,14,16  |    | 2 P11598,Q8CJ52                                                                                              |

|      |                                             |    |                                                                                                                        |
|------|---------------------------------------------|----|------------------------------------------------------------------------------------------------------------------------|
| 5276 | 1,4,6,7,10, 2,3,5,8,9,1<br>11,12,16 3,14,15 | 12 | P00714,P02781,P07647,P08723,P0C0A9,P11598,P22283,P36374,P36376,Q63617,Q9JHB9,Q9QW07                                    |
| 5277 | 1,4,6,7,10, 2,3,5,8,9,1<br>11,13,14 2,15,16 | 5  | P11598,P22283,P36376,Q63617,Q99041                                                                                     |
| 5278 | 1,4,6,7,10, 2,3,5,8,9,1<br>11,13,15 2,14,16 | 5  | P11598,P22283,Q8CJ52,Q8CJD3,Q99041                                                                                     |
| 5279 | 1,4,6,7,10, 2,3,5,8,9,1<br>11,13,16 2,14,15 | 13 | P00714,P02781,P02782,P07647,P08723,P0C0A9,P11598,P22283,P24368,P36376,Q63617,Q99041,Q9JHB9                             |
| 5280 | 1,4,6,7,10, 2,3,5,8,9,1<br>11,14,15 2,13,16 | 3  | P11598,Q8CJ52,Q99041                                                                                                   |
| 5281 | 1,4,6,7,10, 2,3,5,8,9,1<br>11,14,16 2,13,15 | 7  | P07647,P0C0A9,P11598,P22283,P36376,Q99041,Q9JHB9                                                                       |
| 5282 | 1,4,6,7,10, 2,3,5,8,9,1<br>11,15,16 2,13,14 | 9  | P07647,P08723,P0C0A9,P11598,P17988,P22283,Q8CJ52,Q9JHB9,Q9QW07                                                         |
| 5283 | 1,4,6,7,10, 2,3,5,8,9,1<br>12,13,14 1,15,16 | 2  | P36376,P70549                                                                                                          |
| 5284 | 1,4,6,7,10, 2,3,5,8,9,1<br>12,13,15 1,14,16 | 3  | O88797,P10758,P70549                                                                                                   |
| 5285 | 1,4,6,7,10, 2,3,5,8,9,1<br>12,13,16 1,14,15 | 2  | P10758,P36376                                                                                                          |
| 5286 | 1,4,6,7,10, 2,3,5,8,9,1<br>12,14,15 1,13,16 | 0  |                                                                                                                        |
| 5287 | 1,4,6,7,10, 2,3,5,8,9,1<br>12,14,16 1,13,15 | 1  | P36376                                                                                                                 |
| 5288 | 1,4,6,7,10, 2,3,5,8,9,1<br>12,15,16 1,13,14 | 1  | P10758                                                                                                                 |
| 5289 | 1,4,6,7,10, 2,3,5,8,9,1<br>13,14,15 1,12,16 | 2  | O88797,P70549                                                                                                          |
| 5290 | 1,4,6,7,10, 2,3,5,8,9,1<br>13,14,16 1,12,15 | 3  | P36376,P57113,Q99MH3                                                                                                   |
| 5291 | 1,4,6,7,10, 2,3,5,8,9,1<br>13,15,16 1,12,14 | 4  | P10758,P11883,P36376,P51792;P51794;P51796                                                                              |
| 5292 | 1,4,6,7,10, 2,3,5,8,9,1<br>14,15,16 1,12,13 | 2  | P57113,Q9QYP1                                                                                                          |
| 5293 | 1,4,6,7,11, 2,3,5,8,9,1<br>12,13,14 0,15,16 | 5  | P11598,P22283,P36376,Q63617,Q99041                                                                                     |
| 5294 | 1,4,6,7,11, 2,3,5,8,9,1<br>12,13,15 0,14,16 | 5  | P11598,P22283,P36374,Q63617,Q8CJ52                                                                                     |
| 5295 | 1,4,6,7,11, 2,3,5,8,9,1<br>12,13,16 0,14,15 | 17 | O08815,O35547,P00714,P02780,P02781,P02782,P05369,P07647,P08723,P0C0A9,P11598,P22283,P36374,P36376,Q63617,Q99041,Q9JHB9 |

|      |                                             |    |                                                                                                          |
|------|---------------------------------------------|----|----------------------------------------------------------------------------------------------------------|
| 5296 | 1,4,6,7,11, 2,3,5,8,9,1<br>12,14,15 0,13,16 | 2  | P11598,Q8CJ52                                                                                            |
| 5297 | 1,4,6,7,11, 2,3,5,8,9,1<br>12,14,16 0,13,15 | 14 | O35547,P02781,P02782,P07647,P0C0A9,P11598,P22283,P36374,P36376,Q63617,Q99041,Q99376,Q9JHB9,Q9QW07        |
| 5298 | 1,4,6,7,11, 2,3,5,8,9,1<br>12,15,16 0,13,14 | 13 | O08815,O35547,P02781,P07647,P08723,P0C0A9,P11598,P22283,P36374,Q63617,Q8CJ52,Q9JHB9,Q9QW07               |
| 5299 | 1,4,6,7,11, 2,3,5,8,9,1<br>13,14,15 0,12,16 | 4  | P11598,P22283,Q8CJ52,Q99041                                                                              |
| 5300 | 1,4,6,7,11, 2,3,5,8,9,1<br>13,14,16 0,12,15 | 15 | O54728,P00714,P02781,P02782,P07647,P0C0A9,P11598,P22283,P34901,P36374,P36376,Q63617,Q99041,Q99MH3,Q9JHB9 |
| 5301 | 1,4,6,7,11, 2,3,5,8,9,1<br>13,15,16 0,12,14 | 12 | P00714,P02781,P02782,P07647,P08723,P0C0A9,P11598,P22283,P36374,Q63617,Q8CJ52,Q99041                      |
| 5302 | 1,4,6,7,11, 2,3,5,8,9,1<br>14,15,16 0,12,13 | 9  | P07647,P0C0A9,P11598,P22283,P36374,Q8CJ52,Q99041,Q9JHB9,Q9QW07                                           |
| 5303 | 1,4,6,7,12, 2,3,5,8,9,1<br>13,14,15 0,11,16 | 3  | O88797,P70549,Q9Z2L0                                                                                     |
| 5304 | 1,4,6,7,12, 2,3,5,8,9,1<br>13,14,16 0,11,15 | 3  | P36376,Q99MH3,Q9Z2L0                                                                                     |
| 5305 | 1,4,6,7,12, 2,3,5,8,9,1<br>13,15,16 0,11,14 | 2  | P10758,P70549                                                                                            |
| 5306 | 1,4,6,7,12, 2,3,5,8,9,1<br>14,15,16 0,11,13 | 0  |                                                                                                          |
| 5307 | 1,4,6,7,13, 2,3,5,8,9,1<br>14,15,16 0,11,12 | 5  | P01835,P36376,P70549,Q99MH3,Q9Z2L0                                                                       |
| 5308 | 1,4,6,8,9,1 2,3,5,7,13,<br>0,11,12 14,15,16 | 3  | Q62714,Q6AY61,Q6Q7Y5                                                                                     |
| 5309 | 1,4,6,8,9,1 2,3,5,7,12,<br>0,11,13 14,15,16 | 2  | Q6AY61,Q9JI85                                                                                            |
| 5310 | 1,4,6,8,9,1 2,3,5,7,12,<br>0,11,14 13,15,16 | 1  | Q6AY61                                                                                                   |
| 5311 | 1,4,6,8,9,1 2,3,5,7,12,<br>0,11,15 13,14,16 | 3  | Q63474,Q6AY61,Q6P6S4                                                                                     |
| 5312 | 1,4,6,8,9,1 2,3,5,7,12,<br>0,11,16 13,14,15 | 12 | P02782,P04905,P07647,P08723,P0C0A9,P22006,P30120,P60905,Q6AY61,Q812E4,Q9JHB9,Q9QW07                      |
| 5313 | 1,4,6,8,9,1 2,3,5,7,11,<br>0,12,13 14,15,16 | 0  |                                                                                                          |
| 5314 | 1,4,6,8,9,1 2,3,5,7,11,<br>0,12,14 13,15,16 | 0  |                                                                                                          |
| 5315 | 1,4,6,8,9,1 2,3,5,7,11,<br>0,12,15 13,14,16 | 1  | Q63474                                                                                                   |

|      |                        |                         |                                                                                                                                                                         |
|------|------------------------|-------------------------|-------------------------------------------------------------------------------------------------------------------------------------------------------------------------|
| 5316 | 1,4,6,8,9,1<br>0,12,16 | 2,3,5,7,11,<br>13,14,15 | 1 P21674                                                                                                                                                                |
| 5317 | 1,4,6,8,9,1<br>0,13,14 | 2,3,5,7,11,<br>12,15,16 | 0                                                                                                                                                                       |
| 5318 | 1,4,6,8,9,1<br>0,13,15 | 2,3,5,7,11,<br>12,14,16 | 2 Q00715,Q63474                                                                                                                                                         |
| 5319 | 1,4,6,8,9,1<br>0,13,16 | 2,3,5,7,11,<br>12,14,15 | 1 Q6AY61                                                                                                                                                                |
| 5320 | 1,4,6,8,9,1<br>0,14,15 | 2,3,5,7,11,<br>12,13,16 | 2 P47967,Q63474                                                                                                                                                         |
| 5321 | 1,4,6,8,9,1<br>0,14,16 | 2,3,5,7,11,<br>12,13,15 | 2 P47967,Q6AY61                                                                                                                                                         |
| 5322 | 1,4,6,8,9,1<br>0,15,16 | 2,3,5,7,11,<br>12,13,14 | 3 P47967,Q6AY61,Q811M5                                                                                                                                                  |
| 5323 | 1,4,6,8,9,1<br>1,12,13 | 2,3,5,7,10,<br>14,15,16 | 9 B0LT89,P36374,P60905,P61206;P84079,P63095,Q5RKI1,Q6AY61,Q6Q7Y5,Q9JI85                                                                                                 |
| 5324 | 1,4,6,8,9,1<br>1,12,14 | 2,3,5,7,10,<br>13,15,16 | 10 P06911,P20766,P60905,P61206;P84079,P63095,Q5GRG2,Q5RKI1,Q6Q7Y5,Q812E4,Q9QW07                                                                                         |
| 5325 | 1,4,6,8,9,1<br>1,12,15 | 2,3,5,7,10,<br>13,14,16 | 7 P36374,P60905,P63095,Q6P6S4,Q6Q7Y5,Q9QW07,Q9WUW8                                                                                                                      |
| 5326 | 1,4,6,8,9,1<br>1,12,16 | 2,3,5,7,10,<br>13,14,15 | O08815,O35547,P02780,P02781,P02782,P04905,P07647,P08723,P21674,P22006,P30120,P36374,P46462,P60905,P63095,P97523,Q5RKI1,Q63357,Q6AY61,Q6Q7Y5,Q812E4,Q9JHB9,Q9JI85,Q9QW07 |
| 5327 | 1,4,6,8,9,1<br>1,13,14 | 2,3,5,7,10,<br>12,15,16 | 9 O54728,P0DMW0;P0DMW1,P20766,P60905,Q5RKI1,Q6AY61,Q6AYR9,Q812E4,Q9JI85                                                                                                 |
| 5328 | 1,4,6,8,9,1<br>1,13,15 | 2,3,5,7,10,<br>12,14,16 | 6 P60905,Q5RLM2,Q6AY61,Q6AYR9,Q6P6S4,Q9JI85                                                                                                                             |
| 5329 | 1,4,6,8,9,1<br>1,13,16 | 2,3,5,7,10,<br>12,14,15 | 17 P02781,P02782,P07647,P08723,P09456,P0C0A9,P22006,P22282,P30120,P36374,P46462,P60905,Q5RKI1,Q6AY61,Q6RUV5,Q812E4,Q9JI85                                               |
| 5330 | 1,4,6,8,9,1<br>1,14,15 | 2,3,5,7,10,<br>12,13,16 | 5 P20766,P47967,Q6AY61,Q8CJ52,Q9QW07                                                                                                                                    |
| 5331 | 1,4,6,8,9,1<br>1,14,16 | 2,3,5,7,10,<br>12,13,15 | 15 O54728,P02782,P04905,P07647,P08723,P0C0A9,P22006,P30120,P46462,P60905,Q5RKI1,Q6AY61,Q812E4,Q9JHB9,Q9QW07                                                             |
| 5332 | 1,4,6,8,9,1<br>1,15,16 | 2,3,5,7,10,<br>12,13,14 | 12 P02782,P07647,P08723,P0C0A9,P22006,P36374,P60905,Q6AY61,Q6P6S4,Q812E4,Q8CJ52,Q9QW07                                                                                  |
| 5333 | 1,4,6,8,9,1<br>2,13,14 | 2,3,5,7,10,<br>11,15,16 | 1 P20766                                                                                                                                                                |
| 5334 | 1,4,6,8,9,1<br>2,13,15 | 2,3,5,7,10,<br>11,14,16 | 1 P70549                                                                                                                                                                |
| 5335 | 1,4,6,8,9,1<br>2,13,16 | 2,3,5,7,10,<br>11,14,15 | 1 Q5RKI1                                                                                                                                                                |



|      |                         |                         |    |                                                                                                                     |
|------|-------------------------|-------------------------|----|---------------------------------------------------------------------------------------------------------------------|
| 5336 | 1,4,6,8,9,1<br>2,14,15  | 2,3,5,7,10,<br>11,13,16 | 2  | P20766,P47967                                                                                                       |
| 5337 | 1,4,6,8,9,1<br>2,14,16  | 2,3,5,7,10,<br>11,13,15 | 3  | P20766,P21674,Q5RKI1                                                                                                |
| 5338 | 1,4,6,8,9,1<br>2,15,16  | 2,3,5,7,10,<br>11,13,14 | 0  |                                                                                                                     |
| 5339 | 1,4,6,8,9,1<br>3,14,15  | 2,3,5,7,10,<br>11,12,16 | 4  | P20766,P47967,P70549,Q00715                                                                                         |
| 5340 | 1,4,6,8,9,1<br>3,14,16  | 2,3,5,7,10,<br>11,12,15 | 6  | O54728,P20766,P22006,P23593,Q5RKI1,Q6AY61                                                                           |
| 5341 | 1,4,6,8,9,1<br>3,15,16  | 2,3,5,7,10,<br>11,12,14 | 3  | P22006,P23593,Q6AY61                                                                                                |
| 5342 | 1,4,6,8,9,1<br>4,15,16  | 2,3,5,7,10,<br>11,12,13 | 5  | P22006,P23593,P47967,P97840,Q5I0D1                                                                                  |
| 5343 | 1,4,6,8,10,<br>11,12,13 | 2,3,5,7,9,1<br>4,15,16  | 2  | P36374,Q9JI85                                                                                                       |
| 5344 | 1,4,6,8,10,<br>11,12,14 | 2,3,5,7,9,1<br>3,15,16  | 3  | P06911,P12020,Q5GRG2                                                                                                |
| 5345 | 1,4,6,8,10,<br>11,12,15 | 2,3,5,7,9,1<br>3,14,16  | 2  | P36374,Q9QW07                                                                                                       |
| 5346 | 1,4,6,8,10,<br>11,12,16 | 2,3,5,7,9,1<br>3,14,15  | 16 | O35547,P02780,P02781,P02782,P04905,P07647,P08723,P0C0A9,P22282,P30120,P36374,P4646<br>2,P60905,Q9JHB9,Q9JI85,Q9QW07 |
| 5347 | 1,4,6,8,10,<br>11,13,14 | 2,3,5,7,9,1<br>2,15,16  | 4  | O54728,Q6AY61,Q99041,Q9JI85                                                                                         |
| 5348 | 1,4,6,8,10,<br>11,13,15 | 2,3,5,7,9,1<br>2,14,16  | 2  | Q6AY61,Q9JI85                                                                                                       |
| 5349 | 1,4,6,8,10,<br>11,13,16 | 2,3,5,7,9,1<br>2,14,15  | 16 | P00714,P02781,P02782,P07647,P08723,P0C0A9,P15399,P22282,P24368,P30120,P36374,P4646<br>2,P60905,Q6AY61,Q99041,Q9JI85 |
| 5350 | 1,4,6,8,10,<br>11,14,15 | 2,3,5,7,9,1<br>2,13,16  | 1  | Q6AY61                                                                                                              |
| 5351 | 1,4,6,8,10,<br>11,14,16 | 2,3,5,7,9,1<br>2,13,15  | 13 | O54728,P02781,P02782,P04905,P07647,P08723,P0C0A9,P15399,P30120,Q6AY61,Q99041,Q9JH<br>B9,Q9QW07                      |
| 5352 | 1,4,6,8,10,<br>11,15,16 | 2,3,5,7,9,1<br>2,13,14  | 10 | P02782,P07647,P08723,P0C0A9,P15399,P30120,P36374,Q6AY61,Q8CJ52,Q9QW07                                               |
| 5353 | 1,4,6,8,10,<br>12,13,14 | 2,3,5,7,9,1<br>1,15,16  | 2  | P35280,P70549                                                                                                       |
| 5354 | 1,4,6,8,10,<br>12,13,15 | 2,3,5,7,9,1<br>1,14,16  | 1  | P70549                                                                                                              |
| 5355 | 1,4,6,8,10,<br>12,13,16 | 2,3,5,7,9,1<br>1,14,15  | 1  | P35280                                                                                                              |

|      |                                             |                                                                                                                                                                                                         |
|------|---------------------------------------------|---------------------------------------------------------------------------------------------------------------------------------------------------------------------------------------------------------|
| 5356 | 1,4,6,8,10, 2,3,5,7,9,1<br>12,14,15 1,13,16 | 2 P54921,Q63474                                                                                                                                                                                         |
| 5357 | 1,4,6,8,10, 2,3,5,7,9,1<br>12,14,16 1,13,15 | 1 P35280                                                                                                                                                                                                |
| 5358 | 1,4,6,8,10, 2,3,5,7,9,1<br>12,15,16 1,13,14 | 2 P0DMW0;P0DMW1,P10758                                                                                                                                                                                  |
| 5359 | 1,4,6,8,10, 2,3,5,7,9,1<br>13,14,15 1,12,16 | 3 P54921,P70549,Q63474                                                                                                                                                                                  |
| 5360 | 1,4,6,8,10, 2,3,5,7,9,1<br>13,14,16 1,12,15 | 3 O54728,P15399,P35280                                                                                                                                                                                  |
| 5361 | 1,4,6,8,10, 2,3,5,7,9,1<br>13,15,16 1,12,14 | 4 P07151,P11883,P15399,P70549                                                                                                                                                                           |
| 5362 | 1,4,6,8,10, 2,3,5,7,9,1<br>14,15,16 1,12,13 | 3 P15399,P47967,P54921                                                                                                                                                                                  |
| 5363 | 1,4,6,8,11, 2,3,5,7,9,1<br>12,13,14 0,15,16 | 11 O54728,P06911,P12020,P20766,P36374,P46462,P60905,Q5GRG2,Q5RKI1,Q99041,Q9JI85                                                                                                                         |
| 5364 | 1,4,6,8,11, 2,3,5,7,9,1<br>12,13,15 0,14,16 | 3 P36374,P60905,Q9JI85                                                                                                                                                                                  |
| 5365 | 1,4,6,8,11, 2,3,5,7,9,1<br>12,13,16 0,14,15 | O08815,O35547,P00714,P02780,P02781,P02782,P04905,P05369,P06911,P07647,P08723,P0C0A<br>27 9,P12020,P22282,P22283,P24368,P30120,P36374,P46462,P60905,Q5GRG2,Q5M8C6,Q5RKI1,Q6<br>AY61,Q9JHB9,Q9JI85,Q9QW07 |
| 5366 | 1,4,6,8,11, 2,3,5,7,9,1<br>12,14,15 0,13,16 | 6 P06911,P12020,P20766,P36374,Q5GRG2,Q9QW07                                                                                                                                                             |
| 5367 | 1,4,6,8,11, 2,3,5,7,9,1<br>12,14,16 0,13,15 | 22 O35547,O54728,P02780,P02781,P02782,P04905,P06911,P07647,P08723,P0C0A9,P12020,P2076<br>6,P30120,P36374,P46462,P60905,Q5GRG2,Q5RKI1,Q8CFN2,Q9JHB9,Q9JI85,Q9QW07                                        |
| 5368 | 1,4,6,8,11, 2,3,5,7,9,1<br>12,15,16 0,13,14 | 17 O08815,O35547,P02780,P02781,P02782,P04905,P07647,P08723,P0C0A9,P30120,P36374,P4646<br>2,P60905,Q8CJ52,Q9JHB9,Q9JI85,Q9QW07                                                                           |
| 5369 | 1,4,6,8,11, 2,3,5,7,9,1<br>13,14,15 0,12,16 | 5 O54728,P20766,Q6AY61,Q99041,Q9JI85                                                                                                                                                                    |
| 5370 | 1,4,6,8,11, 2,3,5,7,9,1<br>13,14,16 0,12,15 | 21 O35547,O54728,P02781,P02782,P07647,P08723,P09456,P0C0A9,P20766,P22282,P30120,P3490<br>1,P36374,P46462,P60905,Q5GRG2,Q5RKI1,Q6AY61,Q99041,Q9JHB9,Q9JI85                                               |
| 5371 | 1,4,6,8,11, 2,3,5,7,9,1<br>13,15,16 0,12,14 | 14 P02781,P02782,P07647,P08723,P0C0A9,P30120,P36374,P46462,P60905,Q6AY61,Q8CJ52,Q990<br>41,Q9JI85,Q9QW07                                                                                                |
| 5372 | 1,4,6,8,11, 2,3,5,7,9,1<br>14,15,16 0,12,13 | 16 O54728,P02781,P02782,P07647,P08723,P0C0A9,P30120,P36374,P46462,P60905,Q6AY61,Q8CJ<br>52,Q99041,Q9JHB9,Q9QW07,Q9QZK9                                                                                  |
| 5373 | 1,4,6,8,12, 2,3,5,7,9,1<br>13,14,15 0,11,16 | 3 P20766,P70549,Q9Z2L0                                                                                                                                                                                  |
| 5374 | 1,4,6,8,12, 2,3,5,7,9,1<br>13,14,16 0,11,15 | 5 O54728,P20766,P35280,Q5RKI1,Q9Z2L0                                                                                                                                                                    |
| 5375 | 1,4,6,8,12, 2,3,5,7,9,1<br>13,15,16 0,11,14 | 1 P70549                                                                                                                                                                                                |

|      |                                             |                                      |
|------|---------------------------------------------|--------------------------------------|
| 5376 | 1,4,6,8,12, 2,3,5,7,9,1<br>14,15,16 0,11,13 | 1 P20766                             |
| 5377 | 1,4,6,8,13, 2,3,5,7,9,1<br>14,15,16 0,11,12 | 4 O54728,P20766,P70549,Q9Z2L0        |
| 5378 | 1,4,6,9,10, 2,3,5,7,8,1<br>11,12,13 4,15,16 | 3 B0LT89,Q62714,Q62761;Q62762;Q62763 |
| 5379 | 1,4,6,9,10, 2,3,5,7,8,1<br>11,12,14 3,15,16 | 2 Q62714,Q62761;Q62762;Q62763        |
| 5380 | 1,4,6,9,10, 2,3,5,7,8,1<br>11,12,15 3,14,16 | 3 Q62714,Q62761;Q62762;Q62763,Q9WUW8 |
| 5381 | 1,4,6,9,10, 2,3,5,7,8,1<br>11,12,16 3,14,15 | 1 Q62714                             |
| 5382 | 1,4,6,9,10, 2,3,5,7,8,1<br>11,13,14 2,15,16 | 0                                    |
| 5383 | 1,4,6,9,10, 2,3,5,7,8,1<br>11,13,15 2,14,16 | 1 Q5RLM2                             |
| 5384 | 1,4,6,9,10, 2,3,5,7,8,1<br>11,13,16 2,14,15 | 1 P22006                             |
| 5385 | 1,4,6,9,10, 2,3,5,7,8,1<br>11,14,15 2,13,16 | 1 P47967                             |
| 5386 | 1,4,6,9,10, 2,3,5,7,8,1<br>11,14,16 2,13,15 | 1 P22006                             |
| 5387 | 1,4,6,9,10, 2,3,5,7,8,1<br>11,15,16 2,13,14 | 2 P22006,Q811M5                      |
| 5388 | 1,4,6,9,10, 2,3,5,7,8,1<br>12,13,14 1,15,16 | 0                                    |
| 5389 | 1,4,6,9,10, 2,3,5,7,8,1<br>12,13,15 1,14,16 | 3 P08649,P70549,Q00715               |
| 5390 | 1,4,6,9,10, 2,3,5,7,8,1<br>12,13,16 1,14,15 | 0                                    |
| 5391 | 1,4,6,9,10, 2,3,5,7,8,1<br>12,14,15 1,13,16 | 2 P47967,Q00715                      |
| 5392 | 1,4,6,9,10, 2,3,5,7,8,1<br>12,14,16 1,13,15 | 1 P21674                             |
| 5393 | 1,4,6,9,10, 2,3,5,7,8,1<br>12,15,16 1,13,14 | 3 P10758,P25809,Q811M5               |
| 5394 | 1,4,6,9,10, 2,3,5,7,8,1<br>13,14,15 1,12,16 | 4 P47967,P62804,Q00715,Q5PQL7        |
| 5395 | 1,4,6,9,10, 2,3,5,7,8,1<br>13,14,16 1,12,15 | 1 Q5PQL7                             |

|      |                                             |                                                                                                                                                                                           |
|------|---------------------------------------------|-------------------------------------------------------------------------------------------------------------------------------------------------------------------------------------------|
| 5396 | 1,4,6,9,10, 2,3,5,7,8,1<br>13,15,16 1,12,14 | 2 P11883,Q811M5                                                                                                                                                                           |
| 5397 | 1,4,6,9,10, 2,3,5,7,8,1<br>14,15,16 1,12,13 | 3 P47967,Q5I0D1,Q811M5                                                                                                                                                                    |
| 5398 | 1,4,6,9,11, 2,3,5,7,8,1<br>12,13,14 0,15,16 | B0LT89,O35077,O70377,O70594,P12368,P19468,P20766,P48508,P53790,Q05175,Q3ZAV1,Q5I0<br>23 E9,Q5RKI1,Q62761;Q62762;Q62763,Q63270,Q63355,Q63424,Q64093,Q6AY41,Q80W57,Q8R43<br>1,Q9WTW7,Q9Z0W7 |
| 5399 | 1,4,6,9,11, 2,3,5,7,8,1<br>12,13,15 0,14,16 | 6 B0LT89,P20766,Q5RLM2,Q62761;Q62762;Q62763,Q923S2,Q9WUW8                                                                                                                                 |
| 5400 | 1,4,6,9,11, 2,3,5,7,8,1<br>12,13,16 0,14,15 | 9 O08815,O88339;Q4V882,P12368,P22006,P54921,Q05175,Q5RKI1,Q62714,Q62753                                                                                                                   |
| 5401 | 1,4,6,9,11, 2,3,5,7,8,1<br>12,14,15 0,13,16 | 9 O70594,P20766,P25809,P46844,Q62761;Q62762;Q62763,Q63355,Q63424,Q64093,Q9WUW8                                                                                                            |
| 5402 | 1,4,6,9,11, 2,3,5,7,8,1<br>12,14,16 0,13,15 | 10 O70594,O88339;Q4V882,P20766,P22006,P25809,Q5RKI1,Q62714,Q62753,Q63355,Q63618                                                                                                           |
| 5403 | 1,4,6,9,11, 2,3,5,7,8,1<br>12,15,16 0,13,14 | 4 O08815,P22006,P25809,Q9WUW8                                                                                                                                                             |
| 5404 | 1,4,6,9,11, 2,3,5,7,8,1<br>13,14,15 0,12,16 | 3 P0DMW0;P0DMW1,P20766,Q5RLM2                                                                                                                                                             |
| 5405 | 1,4,6,9,11, 2,3,5,7,8,1<br>13,14,16 0,12,15 | 7 O54728,P12368,P20766,P22006,P34901,Q05175,Q5RKI1                                                                                                                                        |
| 5406 | 1,4,6,9,11, 2,3,5,7,8,1<br>13,15,16 0,12,14 | 2 P22006,Q5RLM2                                                                                                                                                                           |
| 5407 | 1,4,6,9,11, 2,3,5,7,8,1<br>14,15,16 0,12,13 | 5 P20766,P22006,P25809,P47967,Q8CJ52                                                                                                                                                      |
| 5408 | 1,4,6,9,12, 2,3,5,7,8,1<br>13,14,15 0,11,16 | 3 P20766,P70549,Q00715                                                                                                                                                                    |
| 5409 | 1,4,6,9,12, 2,3,5,7,8,1<br>13,14,16 0,11,15 | 2 P20766,Q5RKI1                                                                                                                                                                           |
| 5410 | 1,4,6,9,12, 2,3,5,7,8,1<br>13,15,16 0,11,14 | 1 P08937                                                                                                                                                                                  |
| 5411 | 1,4,6,9,12, 2,3,5,7,8,1<br>14,15,16 0,11,13 | 3 P20766,P25809,P47967                                                                                                                                                                    |
| 5412 | 1,4,6,9,13, 2,3,5,7,8,1<br>14,15,16 0,11,12 | 6 P20766,P23593,P47967,Q00715,Q5I0D1,Q5PQL7                                                                                                                                               |
| 5413 | 1,4,6,10,1 2,3,5,7,8,9<br>1,12,13,14 ,15,16 | 1 P35280                                                                                                                                                                                  |
| 5414 | 1,4,6,10,1 2,3,5,7,8,9<br>1,12,13,15 ,14,16 | 0                                                                                                                                                                                         |
| 5415 | 1,4,6,10,1 2,3,5,7,8,9<br>1,12,13,16 ,14,15 | 3 P00714,P35280,P36376                                                                                                                                                                    |

|      |                                             |                                                           |
|------|---------------------------------------------|-----------------------------------------------------------|
| 5416 | 1,4,6,10,1 2,3,5,7,8,9<br>1,12,14,15 ,13,16 | 0                                                         |
| 5417 | 1,4,6,10,1 2,3,5,7,8,9<br>1,12,14,16 ,13,15 | 2 P35280,P36376                                           |
| 5418 | 1,4,6,10,1 2,3,5,7,8,9<br>1,12,15,16 ,13,14 | 0                                                         |
| 5419 | 1,4,6,10,1 2,3,5,7,8,9<br>1,13,14,15 ,12,16 | 0                                                         |
| 5420 | 1,4,6,10,1 2,3,5,7,8,9<br>1,13,14,16 ,12,15 | 5 O54728,P19132,P34901,P35280,P36376                      |
| 5421 | 1,4,6,10,1 2,3,5,7,8,9<br>1,13,15,16 ,12,14 | 0                                                         |
| 5422 | 1,4,6,10,1 2,3,5,7,8,9<br>1,14,15,16 ,12,13 | 0                                                         |
| 5423 | 1,4,6,10,1 2,3,5,7,8,9<br>2,13,14,15 ,11,16 | 3 P06760,P35280,P70549                                    |
| 5424 | 1,4,6,10,1 2,3,5,7,8,9<br>2,13,14,16 ,11,15 | 3 P06760,P35280,P36376                                    |
| 5425 | 1,4,6,10,1 2,3,5,7,8,9<br>2,13,15,16 ,11,14 | 5 P06760,P08937,P10758,P35280,P70549                      |
| 5426 | 1,4,6,10,1 2,3,5,7,8,9<br>2,14,15,16 ,11,13 | 3 P06760,P35280,Q9QYP1                                    |
| 5427 | 1,4,6,10,1 2,3,5,7,8,9<br>3,14,15,16 ,11,12 | 5 P06760,P35280,P70709,Q5PQL7,Q9QYP1                      |
| 5428 | 1,4,6,11,1 2,3,5,7,8,9<br>2,13,14,15 ,10,16 | 2 P20766,P70545                                           |
| 5429 | 1,4,6,11,1 2,3,5,7,8,9<br>2,13,14,16 ,10,15 | 7 O54728,P12368,P19132,P20766,P35280,P36376,Q5RKI1        |
| 5430 | 1,4,6,11,1 2,3,5,7,8,9<br>2,13,15,16 ,10,14 | 2 O08815,P08937                                           |
| 5431 | 1,4,6,11,1 2,3,5,7,8,9<br>2,14,15,16 ,10,13 | 2 P20766,P25809                                           |
| 5432 | 1,4,6,11,1 2,3,5,7,8,9<br>3,14,15,16 ,10,12 | 2 O54728,P20766                                           |
| 5433 | 1,4,6,12,1 2,3,5,7,8,9<br>3,14,15,16 ,10,11 | 5 P06760,P20766,P35280,P70545,P70549                      |
| 5434 | 1,4,7,8,9,1 2,3,5,6,13,<br>0,11,12 14,15,16 | 8 P21674,P36374,P49134,Q62714,Q63493,Q6Q7Y5,Q812E4,Q9Z1F2 |
| 5435 | 1,4,7,8,9,1 2,3,5,6,12,<br>0,11,13 14,15,16 | 3 Q63493,Q812E4,Q9Z1F2                                    |

|      |                        |                         |    |                                                                                                                                                                                       |
|------|------------------------|-------------------------|----|---------------------------------------------------------------------------------------------------------------------------------------------------------------------------------------|
| 5436 | 1,4,7,8,9,1<br>0,11,14 | 2,3,5,6,12,<br>13,15,16 | 2  | Q812E4,Q9Z1F2                                                                                                                                                                         |
| 5437 | 1,4,7,8,9,1<br>0,11,15 | 2,3,5,6,12,<br>13,14,16 | 5  | P20646,P49134,Q6P6R2,Q8CJ52,Q9Z1F2                                                                                                                                                    |
| 5438 | 1,4,7,8,9,1<br>0,11,16 | 2,3,5,6,12,<br>13,14,15 | 16 | P02780,P02781,P02782,P04905,P08723,P09456,P0C0A9,P20646,P21674,P30120,P36374,P49134,Q63493,Q6AY61,Q812E4,Q9JHB9                                                                       |
| 5439 | 1,4,7,8,9,1<br>0,12,13 | 2,3,5,6,11,<br>14,15,16 | 1  | Q9Z1F2                                                                                                                                                                                |
| 5440 | 1,4,7,8,9,1<br>0,12,14 | 2,3,5,6,11,<br>13,15,16 | 2  | P21674,Q9Z1F2                                                                                                                                                                         |
| 5441 | 1,4,7,8,9,1<br>0,12,15 | 2,3,5,6,11,<br>13,14,16 | 3  | P10758,P35745,Q9Z1F2                                                                                                                                                                  |
| 5442 | 1,4,7,8,9,1<br>0,12,16 | 2,3,5,6,11,<br>13,14,15 | 2  | P10758,P21674                                                                                                                                                                         |
| 5443 | 1,4,7,8,9,1<br>0,13,14 | 2,3,5,6,11,<br>12,15,16 | 1  | Q9Z1F2                                                                                                                                                                                |
| 5444 | 1,4,7,8,9,1<br>0,13,15 | 2,3,5,6,11,<br>12,14,16 | 1  | Q9Z1F2                                                                                                                                                                                |
| 5445 | 1,4,7,8,9,1<br>0,13,16 | 2,3,5,6,11,<br>12,14,15 | 0  |                                                                                                                                                                                       |
| 5446 | 1,4,7,8,9,1<br>0,14,15 | 2,3,5,6,11,<br>12,13,16 | 2  | P20646,Q9Z1F2                                                                                                                                                                         |
| 5447 | 1,4,7,8,9,1<br>0,14,16 | 2,3,5,6,11,<br>12,13,15 | 2  | P20646,P21674                                                                                                                                                                         |
| 5448 | 1,4,7,8,9,1<br>0,15,16 | 2,3,5,6,11,<br>12,13,14 | 3  | P10758,P20646,P49134                                                                                                                                                                  |
| 5449 | 1,4,7,8,9,1<br>1,12,13 | 2,3,5,6,10,<br>14,15,16 | 5  | P36374,P60905,Q63493,Q6Q7Y5,Q812E4                                                                                                                                                    |
| 5450 | 1,4,7,8,9,1<br>1,12,14 | 2,3,5,6,10,<br>13,15,16 | 5  | P21674,P36374,Q63493,Q6Q7Y5,Q812E4                                                                                                                                                    |
| 5451 | 1,4,7,8,9,1<br>1,12,15 | 2,3,5,6,10,<br>13,14,16 | 5  | P36374,Q63493,Q6Q7Y5,Q812E4,Q8CJ52                                                                                                                                                    |
| 5452 | 1,4,7,8,9,1<br>1,12,16 | 2,3,5,6,10,<br>13,14,15 | 26 | O08815,P02780,P02781,P02782,P04905,P07647,P08723,P09456,P0C0A9,P21674,P22282,P22283,P30120,P36374,P46462,P49134,P60905,P63322,P97523,Q5M8C6,Q63357,Q63493,Q6Q7Y5,Q812E4,Q9JHB9,Q9QW07 |
| 5453 | 1,4,7,8,9,1<br>1,13,14 | 2,3,5,6,10,<br>12,15,16 | 5  | O54728,P0DMW0,P0DMW1,Q63493,Q6AYR9,Q812E4                                                                                                                                             |
| 5454 | 1,4,7,8,9,1<br>1,13,15 | 2,3,5,6,10,<br>12,14,16 | 4  | Q63493,Q6AYR9,Q812E4,Q8CJ52                                                                                                                                                           |
| 5455 | 1,4,7,8,9,1<br>1,13,16 | 2,3,5,6,10,<br>12,14,15 | 22 | P02780,P02781,P02782,P04905,P07647,P08723,P09456,P0C0A9,P22282,P22283,P24368,P30120,P36374,P46462,P60905,Q5M8C6,Q62902,Q63493,Q63617,Q6AY61,Q812E4,Q9JHB9                             |

|      |                         |                         |    |                                                                                                                                      |
|------|-------------------------|-------------------------|----|--------------------------------------------------------------------------------------------------------------------------------------|
| 5456 | 1,4,7,8,9,1<br>1,14,15  | 2,3,5,6,10,<br>12,13,16 | 3  | P20646,Q812E4,Q8CJ52                                                                                                                 |
| 5457 | 1,4,7,8,9,1<br>1,14,16  | 2,3,5,6,10,<br>12,13,15 | 17 | O54728,P02780,P02781,P02782,P04905,P08723,P09456,P0C0A9,P21674,P30120,P36374,P60905,Q5M8C6,Q63493,Q6AY61,Q812E4,Q9JHB9               |
| 5458 | 1,4,7,8,9,1<br>1,15,16  | 2,3,5,6,10,<br>12,13,14 | 16 | P02780,P02781,P02782,P08723,P09456,P0C0A9,P20646,P30120,P36374,P49134,P60905,Q63493,Q812E4,Q8CJ52,Q9JHB9,Q9QW07                      |
| 5459 | 1,4,7,8,9,1<br>2,13,14  | 2,3,5,6,10,<br>11,15,16 | 0  |                                                                                                                                      |
| 5460 | 1,4,7,8,9,1<br>2,13,15  | 2,3,5,6,10,<br>11,14,16 | 0  |                                                                                                                                      |
| 5461 | 1,4,7,8,9,1<br>2,13,16  | 2,3,5,6,10,<br>11,14,15 | 0  |                                                                                                                                      |
| 5462 | 1,4,7,8,9,1<br>2,14,15  | 2,3,5,6,10,<br>11,13,16 | 0  |                                                                                                                                      |
| 5463 | 1,4,7,8,9,1<br>2,14,16  | 2,3,5,6,10,<br>11,13,15 | 1  | P21674                                                                                                                               |
| 5464 | 1,4,7,8,9,1<br>2,15,16  | 2,3,5,6,10,<br>11,13,14 | 1  | P10758                                                                                                                               |
| 5465 | 1,4,7,8,9,1<br>3,14,15  | 2,3,5,6,10,<br>11,12,16 | 1  | Q9Z1F2                                                                                                                               |
| 5466 | 1,4,7,8,9,1<br>3,14,16  | 2,3,5,6,10,<br>11,12,15 | 3  | B0BNN3,O54728,Q99MH3                                                                                                                 |
| 5467 | 1,4,7,8,9,1<br>3,15,16  | 2,3,5,6,10,<br>11,12,14 | 1  | P20646                                                                                                                               |
| 5468 | 1,4,7,8,9,1<br>4,15,16  | 2,3,5,6,10,<br>11,12,13 | 2  | P20646,P47967                                                                                                                        |
| 5469 | 1,4,7,8,10,<br>11,12,13 | 2,3,5,6,9,1<br>4,15,16  | 5  | P22282,P36374,Q5I0D1,Q63493,Q9Z1F2                                                                                                   |
| 5470 | 1,4,7,8,10,<br>11,12,14 | 2,3,5,6,9,1<br>3,15,16  | 3  | P21674,P36374,Q9Z1F2                                                                                                                 |
| 5471 | 1,4,7,8,10,<br>11,12,15 | 2,3,5,6,9,1<br>3,14,16  | 4  | P10758,P36374,Q63493,Q9Z1F2                                                                                                          |
| 5472 | 1,4,7,8,10,<br>11,12,16 | 2,3,5,6,9,1<br>3,14,15  | 18 | P02780,P02781,P02782,P04905,P07647,P08723,P0C0A9,P21674,P22282,P22283,P24368,P30120,P36374,P40241,Q5M8C6,Q63493,Q9JHB9,Q9QW07        |
| 5473 | 1,4,7,8,10,<br>11,13,14 | 2,3,5,6,9,1<br>2,15,16  | 4  | B0BNN3,O54728,Q99041,Q9Z1F2                                                                                                          |
| 5474 | 1,4,7,8,10,<br>11,13,15 | 2,3,5,6,9,1<br>2,14,16  | 2  | Q63493,Q9Z1F2                                                                                                                        |
| 5475 | 1,4,7,8,10,<br>11,13,16 | 2,3,5,6,9,1<br>2,14,15  | 19 | P00714,P02780,P02781,P02782,P04905,P07647,P08723,P09456,P0C0A9,P22282,P22283,P24368,P30120,P36374,Q5M8C6,Q63493,Q99041,Q99MH3,Q9JHB9 |

|      |                                             |                                                                                                                                                                                   |
|------|---------------------------------------------|-----------------------------------------------------------------------------------------------------------------------------------------------------------------------------------|
| 5476 | 1,4,7,8,10, 2,3,5,6,9,1<br>11,14,15 2,13,16 | 2 Q8CJ52,Q9Z1F2                                                                                                                                                                   |
| 5477 | 1,4,7,8,10, 2,3,5,6,9,1<br>11,14,16 2,13,15 | 16 O54728,P02780,P02781,P02782,P04905,P07647,P08723,P0C0A9,P22283,P30120,P36374,Q5M8C6,Q812E4,Q99041,Q99MH3,Q9JHB9                                                                |
| 5478 | 1,4,7,8,10, 2,3,5,6,9,1<br>11,15,16 2,13,14 | 15 P02780,P02781,P02782,P04905,P08723,P0C0A9,P24368,P30120,P36374,P49134,Q4FZU2,Q6P6Q2,Q8CJ52,Q9JHB9,Q9QW07                                                                       |
| 5479 | 1,4,7,8,10, 2,3,5,6,9,1<br>12,13,14 1,15,16 | 2 Q9Z1F2,Q9Z2L0                                                                                                                                                                   |
| 5480 | 1,4,7,8,10, 2,3,5,6,9,1<br>12,13,15 1,14,16 | 4 P10758,P70549,Q5I0J9,Q9Z1F2                                                                                                                                                     |
| 5481 | 1,4,7,8,10, 2,3,5,6,9,1<br>12,13,16 1,14,15 | 3 P10758,Q5I0J9,Q99MH3                                                                                                                                                            |
| 5482 | 1,4,7,8,10, 2,3,5,6,9,1<br>12,14,15 1,13,16 | 1 Q9Z1F2                                                                                                                                                                          |
| 5483 | 1,4,7,8,10, 2,3,5,6,9,1<br>12,14,16 1,13,15 | 2 P21674,Q99MH3                                                                                                                                                                   |
| 5484 | 1,4,7,8,10, 2,3,5,6,9,1<br>12,15,16 1,13,14 | 3 P0DMW0;P0DMW1,P10758,Q5I0J9                                                                                                                                                     |
| 5485 | 1,4,7,8,10, 2,3,5,6,9,1<br>13,14,15 1,12,16 | 2 Q9Z1F2,Q9Z2L0                                                                                                                                                                   |
| 5486 | 1,4,7,8,10, 2,3,5,6,9,1<br>13,14,16 1,12,15 | 4 B0BNN3,O54728,Q99MH3,Q9Z2L0                                                                                                                                                     |
| 5487 | 1,4,7,8,10, 2,3,5,6,9,1<br>13,15,16 1,12,14 | 4 O35077,P10758,Q5I0J9,Q64093                                                                                                                                                     |
| 5488 | 1,4,7,8,10, 2,3,5,6,9,1<br>14,15,16 1,12,13 | 3 O35077,P97608,Q9QYP1                                                                                                                                                            |
| 5489 | 1,4,7,8,11, 2,3,5,6,9,1<br>12,13,14 0,15,16 | 5 O54728,P36374,Q63493,Q811M5,Q99MH3                                                                                                                                              |
| 5490 | 1,4,7,8,11, 2,3,5,6,9,1<br>12,13,15 0,14,16 | 3 P36374,Q63493,Q8CJ52                                                                                                                                                            |
| 5491 | 1,4,7,8,11, 2,3,5,6,9,1<br>12,13,16 0,14,15 | O08815,O35547,P00714,P02780,P02781,P02782,P04905,P07647,P08723,P09456,P0C0A9,P222825 2,P22283,P24368,P30120,P36374,P40241,P46462,P60905,Q5M8C6,Q63493,Q811M5,Q812E4,Q99MH3,Q9JHB9 |
| 5492 | 1,4,7,8,11, 2,3,5,6,9,1<br>12,14,15 0,13,16 | 4 D3ZTX0,P36374,Q63493,Q8CJ52                                                                                                                                                     |
| 5493 | 1,4,7,8,11, 2,3,5,6,9,1<br>12,14,16 0,13,15 | D3ZTX0,O54728,P02780,P02781,P02782,P04905,P07647,P08723,P09456,P0C0A9,P21674,P222824 2,P22283,P30120,P36374,P46462,P60905,Q5M8C6,Q63493,Q811M5,Q812E4,Q99MH3,Q9JHB9,Q9QW07        |
| 5494 | 1,4,7,8,11, 2,3,5,6,9,1<br>12,15,16 0,13,14 | O08815,P02780,P02781,P02782,P04905,P07647,P08723,P0C0A9,P10758,P22282,P22283,P30122 0,P36374,P40241,P60905,Q4FZU2,Q5M8C6,Q63493,Q6P6Q2,Q8CJ52,Q9JHB9,Q9QW07                       |



|      |                                             |                                                                                                                                                                         |
|------|---------------------------------------------|-------------------------------------------------------------------------------------------------------------------------------------------------------------------------|
| 5495 | 1,4,7,8,11, 2,3,5,6,9,1<br>13,14,15 0,12,16 | 5 B0BNN3,O54728,Q63493,Q8CJ52,Q99041                                                                                                                                    |
| 5496 | 1,4,7,8,11, 2,3,5,6,9,1<br>13,14,16 0,12,15 | B0BNN3,O54728,P02780,P02781,P02782,P04905,P07647,P08723,P09456,P0C0A9,P22282,P22283,P24368,P30120,P36374,P46462,P60905,Q5M8C6,Q63493,Q811M5,Q812E4,Q99041,Q99MH3,Q9JHB9 |
| 5497 | 1,4,7,8,11, 2,3,5,6,9,1<br>13,15,16 0,12,14 | 21 P02780,P02781,P02782,P07647,P08723,P09456,P0C0A9,P22282,P22283,P24368,P30120,P36374,P46462,P60905,Q4FZU2,Q5M8C6,Q63493,Q6P6Q2,Q8CJ52,Q99041,Q9JHB9                   |
| 5498 | 1,4,7,8,11, 2,3,5,6,9,1<br>14,15,16 0,12,13 | 17 D3ZTX0,O54728,P02780,P02781,P02782,P08723,P0C0A9,P30120,P36374,Q4FZU2,Q6P6Q2,Q812E4,Q8CJ52,Q99041,Q99MH3,Q9JHB9,Q9QW07                                               |
| 5499 | 1,4,7,8,12, 2,3,5,6,9,1<br>13,14,15 0,11,16 | 2 P70549,Q9Z2L0                                                                                                                                                         |
| 5500 | 1,4,7,8,12, 2,3,5,6,9,1<br>13,14,16 0,11,15 | 5 B0BNN3,O54728,Q811M5,Q99MH3,Q9Z2L0                                                                                                                                    |
| 5501 | 1,4,7,8,12, 2,3,5,6,9,1<br>13,15,16 0,11,14 | 3 P10758,Q5I0J9,Q9Z2L0                                                                                                                                                  |
| 5502 | 1,4,7,8,12, 2,3,5,6,9,1<br>14,15,16 0,11,13 | 2 Q99MH3,Q9Z2L0                                                                                                                                                         |
| 5503 | 1,4,7,8,13, 2,3,5,6,9,1<br>14,15,16 0,11,12 | 4 B0BNN3,O54728,Q99MH3,Q9Z2L0                                                                                                                                           |
| 5504 | 1,4,7,9,10, 2,3,5,6,8,1<br>11,12,13 4,15,16 | 2 Q62714,Q62761;Q62762;Q62763                                                                                                                                           |
| 5505 | 1,4,7,9,10, 2,3,5,6,8,1<br>11,12,14 3,15,16 | 3 P21674,Q62714,Q62761;Q62762;Q62763                                                                                                                                    |
| 5506 | 1,4,7,9,10, 2,3,5,6,8,1<br>11,12,15 3,14,16 | 4 P10758,Q62714,Q62761;Q62762;Q62763,Q9WUW8                                                                                                                             |
| 5507 | 1,4,7,9,10, 2,3,5,6,8,1<br>11,12,16 3,14,15 | 2 P21674,Q62714                                                                                                                                                         |
| 5508 | 1,4,7,9,10, 2,3,5,6,8,1<br>11,13,14 2,15,16 | 2 P36376,Q9R168                                                                                                                                                         |
| 5509 | 1,4,7,9,10, 2,3,5,6,8,1<br>11,13,15 2,14,16 | 0                                                                                                                                                                       |
| 5510 | 1,4,7,9,10, 2,3,5,6,8,1<br>11,13,16 2,14,15 | 2 P36376,Q9R168                                                                                                                                                         |
| 5511 | 1,4,7,9,10, 2,3,5,6,8,1<br>11,14,15 2,13,16 | 0                                                                                                                                                                       |
| 5512 | 1,4,7,9,10, 2,3,5,6,8,1<br>11,14,16 2,13,15 | 2 P36376,Q9R168                                                                                                                                                         |
| 5513 | 1,4,7,9,10, 2,3,5,6,8,1<br>11,15,16 2,13,14 | 1 Q8CJ52                                                                                                                                                                |
| 5514 | 1,4,7,9,10, 2,3,5,6,8,1<br>12,13,14 1,15,16 | 1 Q6IFU7                                                                                                                                                                |

|      |                                             |                                                                                |
|------|---------------------------------------------|--------------------------------------------------------------------------------|
| 5515 | 1,4,7,9,10, 2,3,5,6,8,1<br>12,13,15 1,14,16 | 1 P10758                                                                       |
| 5516 | 1,4,7,9,10, 2,3,5,6,8,1<br>12,13,16 1,14,15 | 2 P10758,Q6IFU7                                                                |
| 5517 | 1,4,7,9,10, 2,3,5,6,8,1<br>12,14,15 1,13,16 | 0                                                                              |
| 5518 | 1,4,7,9,10, 2,3,5,6,8,1<br>12,14,16 1,13,15 | 2 P21674,Q6IFU7                                                                |
| 5519 | 1,4,7,9,10, 2,3,5,6,8,1<br>12,15,16 1,13,14 | 2 P08937,P10758                                                                |
| 5520 | 1,4,7,9,10, 2,3,5,6,8,1<br>13,14,15 1,12,16 | 1 Q00715                                                                       |
| 5521 | 1,4,7,9,10, 2,3,5,6,8,1<br>13,14,16 1,12,15 | 2 P36376,Q9R168                                                                |
| 5522 | 1,4,7,9,10, 2,3,5,6,8,1<br>13,15,16 1,12,14 | 2 P08937,P10758                                                                |
| 5523 | 1,4,7,9,10, 2,3,5,6,8,1<br>14,15,16 1,12,13 | 2 P47967,Q9QYP1                                                                |
| 5524 | 1,4,7,9,11, 2,3,5,6,8,1<br>12,13,14 0,15,16 | 8 O70594,O88339;Q4V882,P25031,P53790,P97605,Q05175,Q62761;Q62762;Q62763,Q63270 |
| 5525 | 1,4,7,9,11, 2,3,5,6,8,1<br>12,13,15 0,14,16 | 2 P25031,Q62761;Q62762;Q62763                                                  |
| 5526 | 1,4,7,9,11, 2,3,5,6,8,1<br>12,13,16 0,14,15 | 5 O08815,O88339;Q4V882,P54921,P63322,Q62714                                    |
| 5527 | 1,4,7,9,11, 2,3,5,6,8,1<br>12,14,15 0,13,16 | 4 O70594,P25031,P97605,Q62761;Q62762;Q62763                                    |
| 5528 | 1,4,7,9,11, 2,3,5,6,8,1<br>12,14,16 0,13,15 | 9 O70594,O88339;Q4V882,P10247,P21674,P63322,Q498D9,Q62714,Q63618,Q812E4        |
| 5529 | 1,4,7,9,11, 2,3,5,6,8,1<br>12,15,16 0,13,14 | 5 O08815,P08937,P10758,P25809,Q8CJ52                                           |
| 5530 | 1,4,7,9,11, 2,3,5,6,8,1<br>13,14,15 0,12,16 | 3 P0DMW0;P0DMW1,P25031,P36970                                                  |
| 5531 | 1,4,7,9,11, 2,3,5,6,8,1<br>13,14,16 0,12,15 | 6 O54728,P36376,Q498D9,Q812E4,Q99MH3,Q9R168                                    |
| 5532 | 1,4,7,9,11, 2,3,5,6,8,1<br>13,15,16 0,12,14 | 4 P08937,P25031,Q5RLM2,Q8CJ52                                                  |
| 5533 | 1,4,7,9,11, 2,3,5,6,8,1<br>14,15,16 0,12,13 | 3 P25031,Q8CJ52,Q9R168                                                         |
| 5534 | 1,4,7,9,12, 2,3,5,6,8,1<br>13,14,15 0,11,16 | 0                                                                              |

|      |                                             |                               |
|------|---------------------------------------------|-------------------------------|
| 5535 | 1,4,7,9,12, 2,3,5,6,8,1<br>13,14,16 0,11,15 | 2 Q6IFU7,Q99MH3               |
| 5536 | 1,4,7,9,12, 2,3,5,6,8,1<br>13,15,16 0,11,14 | 2 P08937,P10758               |
| 5537 | 1,4,7,9,12, 2,3,5,6,8,1<br>14,15,16 0,11,13 | 0                             |
| 5538 | 1,4,7,9,13, 2,3,5,6,8,1<br>14,15,16 0,11,12 | 0                             |
| 5539 | 1,4,7,10,1 2,3,5,6,8,9<br>1,12,13,14 ,15,16 | 1 P36376                      |
| 5540 | 1,4,7,10,1 2,3,5,6,8,9<br>1,12,13,15 ,14,16 | 1 P10758                      |
| 5541 | 1,4,7,10,1 2,3,5,6,8,9<br>1,12,13,16 ,14,15 | 4 P00714,P36376,P97840,Q99MH3 |
| 5542 | 1,4,7,10,1 2,3,5,6,8,9<br>1,12,14,15 ,13,16 | 0                             |
| 5543 | 1,4,7,10,1 2,3,5,6,8,9<br>1,12,14,16 ,13,15 | 3 P21674,P36376,Q99MH3        |
| 5544 | 1,4,7,10,1 2,3,5,6,8,9<br>1,12,15,16 ,13,14 | 2 P08937,P10758               |
| 5545 | 1,4,7,10,1 2,3,5,6,8,9<br>1,13,14,15 ,12,16 | 0                             |
| 5546 | 1,4,7,10,1 2,3,5,6,8,9<br>1,13,14,16 ,12,15 | 3 O54728,P36376,Q99MH3        |
| 5547 | 1,4,7,10,1 2,3,5,6,8,9<br>1,13,15,16 ,12,14 | 2 P08937,P36376               |
| 5548 | 1,4,7,10,1 2,3,5,6,8,9<br>1,14,15,16 ,12,13 | 3 P36376,Q8CJ52,Q9QYP1        |
| 5549 | 1,4,7,10,1 2,3,5,6,8,9<br>2,13,14,15 ,11,16 | 1 O88797                      |
| 5550 | 1,4,7,10,1 2,3,5,6,8,9<br>2,13,14,16 ,11,15 | 3 P36376,Q6P6S4,Q99MH3        |
| 5551 | 1,4,7,10,1 2,3,5,6,8,9<br>2,13,15,16 ,11,14 | 3 P08937,P10758,Q5I0J9        |
| 5552 | 1,4,7,10,1 2,3,5,6,8,9<br>2,14,15,16 ,11,13 | 2 P10758,Q9QYP1               |
| 5553 | 1,4,7,10,1 2,3,5,6,8,9<br>3,14,15,16 ,11,12 | 4 P09527,P36376,Q99MH3,Q9QYP1 |
| 5554 | 1,4,7,11,1 2,3,5,6,8,9<br>2,13,14,15 ,10,16 | 2 D3ZTX0,P25031               |

|      |                          |                        |   |                                                  |
|------|--------------------------|------------------------|---|--------------------------------------------------|
| 5555 | 1,4,7,11,1<br>2,13,14,16 | 2,3,5,6,8,9<br>,10,15  | 5 | O54728,P25031,P36376,Q811M5,Q99MH3               |
| 5556 | 1,4,7,11,1<br>2,13,15,16 | 2,3,5,6,8,9<br>,10,14  | 4 | O08815,P08937,P17559,P25031                      |
| 5557 | 1,4,7,11,1<br>2,14,15,16 | 2,3,5,6,8,9<br>,10,13  | 4 | D3ZTX0,P17559,P25031,Q8CJ52                      |
| 5558 | 1,4,7,11,1<br>3,14,15,16 | 2,3,5,6,8,9<br>,10,12  | 7 | D3ZTX0,O54728,P17559,P25031,P36376,Q8CJ52,Q99MH3 |
| 5559 | 1,4,7,12,1<br>3,14,15,16 | 2,3,5,6,8,9<br>,10,11  | 3 | Q6P6S4,Q99MH3,Q9ZZL0                             |
| 5560 | 1,4,8,9,10,<br>11,12,13  | 2,3,5,6,7,1<br>4,15,16 | 2 | B0LT89,Q62714                                    |
| 5561 | 1,4,8,9,10,<br>11,12,14  | 2,3,5,6,7,1<br>3,15,16 | 3 | P01835,P21674,Q62714                             |
| 5562 | 1,4,8,9,10,<br>11,12,15  | 2,3,5,6,7,1<br>3,14,16 | 3 | P01835,Q62714,Q9WUW8                             |
| 5563 | 1,4,8,9,10,<br>11,12,16  | 2,3,5,6,7,1<br>3,14,15 | 3 | P01835,P21674,Q62714                             |
| 5564 | 1,4,8,9,10,<br>11,13,14  | 2,3,5,6,7,1<br>2,15,16 | 3 | B0LT89,O54728,Q6AY61                             |
| 5565 | 1,4,8,9,10,<br>11,13,15  | 2,3,5,6,7,1<br>2,14,16 | 2 | B0LT89,Q6AY61                                    |
| 5566 | 1,4,8,9,10,<br>11,13,16  | 2,3,5,6,7,1<br>2,14,15 | 3 | P30120,P60905,Q6AY61                             |
| 5567 | 1,4,8,9,10,<br>11,14,15  | 2,3,5,6,7,1<br>2,13,16 | 2 | P47967,Q6AY61                                    |
| 5568 | 1,4,8,9,10,<br>11,14,16  | 2,3,5,6,7,1<br>2,13,15 | 4 | O54728,P01835,Q6AY61,Q812E4                      |
| 5569 | 1,4,8,9,10,<br>11,15,16  | 2,3,5,6,7,1<br>2,13,14 | 3 | P01835,P49134,Q6AY61                             |
| 5570 | 1,4,8,9,10,<br>12,13,14  | 2,3,5,6,7,1<br>1,15,16 | 1 | P17988                                           |
| 5571 | 1,4,8,9,10,<br>12,13,15  | 2,3,5,6,7,1<br>1,14,16 | 0 |                                                  |
| 5572 | 1,4,8,9,10,<br>12,13,16  | 2,3,5,6,7,1<br>1,14,15 | 0 |                                                  |
| 5573 | 1,4,8,9,10,<br>12,14,15  | 2,3,5,6,7,1<br>1,13,16 | 1 | P47967                                           |
| 5574 | 1,4,8,9,10,<br>12,14,16  | 2,3,5,6,7,1<br>1,13,15 | 1 | P21674                                           |

|      |                                             |                                                                                                                               |
|------|---------------------------------------------|-------------------------------------------------------------------------------------------------------------------------------|
| 5575 | 1,4,8,9,10, 2,3,5,6,7,1<br>12,15,16 1,13,14 | 1 P10758                                                                                                                      |
| 5576 | 1,4,8,9,10, 2,3,5,6,7,1<br>13,14,15 1,12,16 | 2 P47967,Q00715                                                                                                               |
| 5577 | 1,4,8,9,10, 2,3,5,6,7,1<br>13,14,16 1,12,15 | 1 O54728                                                                                                                      |
| 5578 | 1,4,8,9,10, 2,3,5,6,7,1<br>13,15,16 1,12,14 | 0                                                                                                                             |
| 5579 | 1,4,8,9,10, 2,3,5,6,7,1<br>14,15,16 1,12,13 | 2 P47967,Q5I0D1                                                                                                               |
| 5580 | 1,4,8,9,11, 2,3,5,6,7,1<br>12,13,14 0,15,16 | 17 B0LT89,O54728,O70594,P17988,P18297,P19468,P20766,P48508,P53790,P57113,P63095,Q0517<br>5,Q5I0E9,Q63270,Q6Q7Y5,Q71MB6,Q9WTW7 |
| 5581 | 1,4,8,9,11, 2,3,5,6,7,1<br>12,13,15 0,14,16 | 6 B0LT89,P18297,P36970,P57113,Q71MB6,Q9WUW8                                                                                   |
| 5582 | 1,4,8,9,11, 2,3,5,6,7,1<br>12,13,16 0,14,15 | 12 B0LT89,O08815,P02782,P30120,P54921,P60905,Q5RKI1,Q62714,Q63357,Q6AY61,Q6Q7Y5,Q81<br>2E4                                    |
| 5583 | 1,4,8,9,11, 2,3,5,6,7,1<br>12,14,15 0,13,16 | 5 O70594,P18297,P20766,P36970,Q9WUW8                                                                                          |
| 5584 | 1,4,8,9,11, 2,3,5,6,7,1<br>12,14,16 0,13,15 | 9 O54728,O70594,P20766,P21674,P60905,Q5RKI1,Q62714,Q6Q7Y5,Q812E4                                                              |
| 5585 | 1,4,8,9,11, 2,3,5,6,7,1<br>12,15,16 0,13,14 | 4 O08815,P60905,Q62714,Q9WUW8                                                                                                 |
| 5586 | 1,4,8,9,11, 2,3,5,6,7,1<br>13,14,15 0,12,16 | 7 B0LT89,O54728,P0DMW0;P0DMW1,P18297,P20766,P36970,Q6AY61                                                                     |
| 5587 | 1,4,8,9,11, 2,3,5,6,7,1<br>13,14,16 0,12,15 | 7 O54728,P20766,P30120,P60905,Q5RKI1,Q6AY61,Q812E4                                                                            |
| 5588 | 1,4,8,9,11, 2,3,5,6,7,1<br>13,15,16 0,12,14 | 4 P30120,P60905,Q5RLM2,Q6AY61                                                                                                 |
| 5589 | 1,4,8,9,11, 2,3,5,6,7,1<br>14,15,16 0,12,13 | 5 O54728,P20766,P47967,Q6AY61,Q812E4                                                                                          |
| 5590 | 1,4,8,9,12, 2,3,5,6,7,1<br>13,14,15 0,11,16 | 1 P20766                                                                                                                      |
| 5591 | 1,4,8,9,12, 2,3,5,6,7,1<br>13,14,16 0,11,15 | 3 O54728,P20766,Q5RKI1                                                                                                        |
| 5592 | 1,4,8,9,12, 2,3,5,6,7,1<br>13,15,16 0,11,14 | 1 P50116                                                                                                                      |
| 5593 | 1,4,8,9,12, 2,3,5,6,7,1<br>14,15,16 0,11,13 | 2 P20766,P47967                                                                                                               |
| 5594 | 1,4,8,9,13, 2,3,5,6,7,1<br>14,15,16 0,11,12 | 6 O54728,P20766,P23593,P47967,P50116,Q63199                                                                                   |

|      |                                             |                                                                  |
|------|---------------------------------------------|------------------------------------------------------------------|
| 5595 | 1,4,8,10,1 2,3,5,6,7,9<br>1,12,13,14 ,15,16 | 1 O54728                                                         |
| 5596 | 1,4,8,10,1 2,3,5,6,7,9<br>1,12,13,15 ,14,16 | 0                                                                |
| 5597 | 1,4,8,10,1 2,3,5,6,7,9<br>1,12,13,16 ,14,15 | 2 P02782,P30120                                                  |
| 5598 | 1,4,8,10,1 2,3,5,6,7,9<br>1,12,14,15 ,13,16 | 0                                                                |
| 5599 | 1,4,8,10,1 2,3,5,6,7,9<br>1,12,14,16 ,13,15 | 2 O54728,P21674                                                  |
| 5600 | 1,4,8,10,1 2,3,5,6,7,9<br>1,12,15,16 ,13,14 | 2 P10758,Q5QE79                                                  |
| 5601 | 1,4,8,10,1 2,3,5,6,7,9<br>1,13,14,15 ,12,16 | 2 O54728,Q6AY61                                                  |
| 5602 | 1,4,8,10,1 2,3,5,6,7,9<br>1,13,14,16 ,12,15 | 4 O54728,P30120,Q6AY61,Q99MH3                                    |
| 5603 | 1,4,8,10,1 2,3,5,6,7,9<br>1,13,15,16 ,12,14 | 2 P30120,Q6AY61                                                  |
| 5604 | 1,4,8,10,1 2,3,5,6,7,9<br>1,14,15,16 ,12,13 | 2 O54728,Q6AY61                                                  |
| 5605 | 1,4,8,10,1 2,3,5,6,7,9<br>2,13,14,15 ,11,16 | 1 P70549                                                         |
| 5606 | 1,4,8,10,1 2,3,5,6,7,9<br>2,13,14,16 ,11,15 | 3 O54728,P35280,Q99MH3                                           |
| 5607 | 1,4,8,10,1 2,3,5,6,7,9<br>2,13,15,16 ,11,14 | 2 P10758,P50116                                                  |
| 5608 | 1,4,8,10,1 2,3,5,6,7,9<br>2,14,15,16 ,11,13 | 0                                                                |
| 5609 | 1,4,8,10,1 2,3,5,6,7,9<br>3,14,15,16 ,11,12 | 2 O54728,P50116                                                  |
| 5610 | 1,4,8,11,1 2,3,5,6,7,9<br>2,13,14,15 ,10,16 | 3 D3ZTX0,O54728,P20766                                           |
| 5611 | 1,4,8,11,1 2,3,5,6,7,9<br>2,13,14,16 ,10,15 | 9 D3ZTX0,O54728,P02782,P20766,P30120,P60905,Q5RKI1,Q811M5,Q99MH3 |
| 5612 | 1,4,8,11,1 2,3,5,6,7,9<br>2,13,15,16 ,10,14 | 7 O08815,P02782,P30120,P36374,P50116,P60905,Q5QE79               |
| 5613 | 1,4,8,11,1 2,3,5,6,7,9<br>2,14,15,16 ,10,13 | 3 D3ZTX0,O54728,P20766                                           |
| 5614 | 1,4,8,11,1 2,3,5,6,7,9<br>3,14,15,16 ,10,12 | 6 D3ZTX0,O54728,P20766,P30120,P50116,Q6AY61                      |

|      |                                             |    |                                                                                                                                                                                                                                                                                                                                                                             |
|------|---------------------------------------------|----|-----------------------------------------------------------------------------------------------------------------------------------------------------------------------------------------------------------------------------------------------------------------------------------------------------------------------------------------------------------------------------|
| 5615 | 1,4,8,12,1 2,3,5,6,7,9<br>3,14,15,16 ,10,11 | 4  | O54728,P20766,P50116,Q9Z2L0                                                                                                                                                                                                                                                                                                                                                 |
| 5616 | 1,4,9,10,1 2,3,5,6,7,8<br>1,12,13,14 ,15,16 | 14 | BOLT89,O70594,P38918,P46844,P48508,P50115,P50116,P53790,Q05175,Q62714,Q62761;Q62762;Q62763,Q63270,Q9WTW7,Q9Z0W7                                                                                                                                                                                                                                                             |
| 5617 | 1,4,9,10,1 2,3,5,6,7,8<br>1,12,13,15 ,14,16 | 10 | BOLT89,P08937,P36970,P50115,P50116,P52590,Q5RLM2,Q62714,Q62761;Q62762;Q62763,Q9WUW8                                                                                                                                                                                                                                                                                         |
| 5618 | 1,4,9,10,1 2,3,5,6,7,8<br>1,12,13,16 ,14,15 | 5  | BOLT89,P08937,P50115,P50116,Q62714                                                                                                                                                                                                                                                                                                                                          |
| 5619 | 1,4,9,10,1 2,3,5,6,7,8<br>1,12,14,15 ,13,16 | 7  | O70594,P46844,P50115,P50116,Q62714,Q62761;Q62762;Q62763,Q9WUW8                                                                                                                                                                                                                                                                                                              |
| 5620 | 1,4,9,10,1 2,3,5,6,7,8<br>1,12,14,16 ,13,15 | 7  | O70594,P10247,P21674,P50115,P50116,Q62714,Q8CGS4                                                                                                                                                                                                                                                                                                                            |
| 5621 | 1,4,9,10,1 2,3,5,6,7,8<br>1,12,15,16 ,13,14 | 9  | P08937,P10758,P25809,P50115,P50116,P63081,Q5QE79,Q62714,Q9WUW8                                                                                                                                                                                                                                                                                                              |
| 5622 | 1,4,9,10,1 2,3,5,6,7,8<br>1,13,14,15 ,12,16 | 5  | BOLT89,P36970,P46844,P50115,P50116                                                                                                                                                                                                                                                                                                                                          |
| 5623 | 1,4,9,10,1 2,3,5,6,7,8<br>1,13,14,16 ,12,15 | 4  | O54728,P36376,P50115,P50116                                                                                                                                                                                                                                                                                                                                                 |
| 5624 | 1,4,9,10,1 2,3,5,6,7,8<br>1,13,15,16 ,12,14 | 6  | P08937,P50115,P50116,Q5QE79,Q5RLM2,Q63751                                                                                                                                                                                                                                                                                                                                   |
| 5625 | 1,4,9,10,1 2,3,5,6,7,8<br>1,14,15,16 ,12,13 | 4  | P08937,P47967,P50115,P50116                                                                                                                                                                                                                                                                                                                                                 |
| 5626 | 1,4,9,10,1 2,3,5,6,7,8<br>2,13,14,15 ,11,16 | 8  | P02780,P08937,P09456,P50115,P50116,P50280,Q00715,Q5M8C6                                                                                                                                                                                                                                                                                                                     |
| 5627 | 1,4,9,10,1 2,3,5,6,7,8<br>2,13,14,16 ,11,15 | 3  | P50115,P50116,P50280                                                                                                                                                                                                                                                                                                                                                        |
| 5628 | 1,4,9,10,1 2,3,5,6,7,8<br>2,13,15,16 ,11,14 | 6  | P08937,P10758,P50115,P50116,Q5QE79,Q63751                                                                                                                                                                                                                                                                                                                                   |
| 5629 | 1,4,9,10,1 2,3,5,6,7,8<br>2,14,15,16 ,11,13 | 4  | P08937,P47967,P50115,P50116                                                                                                                                                                                                                                                                                                                                                 |
| 5630 | 1,4,9,10,1 2,3,5,6,7,8<br>3,14,15,16 ,11,12 | 8  | P08937,P12020,P47967,P50115,P50116,P70709,Q00715,Q5I0D1                                                                                                                                                                                                                                                                                                                     |
| 5631 | 1,4,9,11,1 2,3,5,6,7,8<br>2,13,14,15 ,10,16 | 49 | BOLT89,O35763,O70257,O70377,O70594,O88339;Q4V882,P02631,P08937,P18757,P19468,P20766,P25031,P29975,P36970,P38918,P46720,P46844,P48508,P50115,P50116,P53790,P57113,P97605,Q03248,Q05175,Q3T1J9,Q3ZAV1,Q5I0E9,Q5M7T9,Q5RLM2,Q62761;Q62762;Q62763,Q63270,Q63424,Q63618,Q64093,Q64602,Q68FT5,Q6AY41,Q6MG61,Q6Q0N1,Q71MB6,Q80W57,Q8R431,Q923S2,Q9JJ40,Q9WTW7,Q9WUW8,Q9WUW9,Q9Z0W7 |
| 5632 | 1,4,9,11,1 2,3,5,6,7,8<br>2,13,14,16 ,10,15 | 42 | BOLT89,O08557,O35763,O54728,O70377,O70594,O88339;Q4V882,P10247,P12368,P19468,P20766,P25031,P30904,P38918,P46844,P48508,P50115,P50116,P51907,P53790,P54921,P57113,P97605,Q05175,Q3T1J9,Q3ZAV1,Q498D9,Q5I0E9,Q5M7T9,Q5RKI1,Q62714,Q62753,Q63270,Q63618,Q6MG61,Q6Q0N1,Q80W57,Q8CGS4,Q8R431,Q923S2,Q9WTW7,Q9Z0W7                                                                |

|      |                               |                          |    |                                                                                                                                                                         |
|------|-------------------------------|--------------------------|----|-------------------------------------------------------------------------------------------------------------------------------------------------------------------------|
| 5633 | 1,4,9,11,1<br>2,13,15,16      | 2,3,5,6,7,8<br>,10,14    | 22 | B0LT89,O08815,O70594,O88339;Q4V882,P08937,P20766,P25031,P25809,P48508,P50115,P50116,P53790,P54921,P57113,P63081,Q05175,Q5QE79,Q5RLM2,Q62714,Q63751,Q923S2,Q9WUW8        |
| 5634 | 1,4,9,11,1<br>2,14,15,16      | 2,3,5,6,7,8<br>,10,13    | 23 | O70257,O70594,O88339;Q4V882,P02631,P08937,P10247,P20766,P25031,P25809,P30904,P36860,P46844,P48508,P50115,P50116,P53790,P57113,P97605,Q05175,Q3ZAV1,Q62714,Q63618,Q9WUW8 |
| 5635 | 1,4,9,11,1<br>3,14,15,16      | 2,3,5,6,7,8<br>,10,12    | 17 | O54728,O70594,P02631,P08937,P0DMW0;P0DMW1,P20766,P25031,P30904,P36970,P46844,P48508,P50115,P50116,P53790,Q05175,Q5RLM2,Q63270                                           |
| 5636 | 1,4,9,12,1<br>3,14,15,16      | 2,3,5,6,7,8<br>,10,11    | 4  | P08937,P20766,P50115,P50116                                                                                                                                             |
| 5637 | 1,4,10,11,<br>12,13,14,1<br>5 | 2,3,5,6,7,8<br>,9,16     | 2  | P50115,P50116                                                                                                                                                           |
| 5638 | 1,4,10,11,<br>12,13,14,1<br>6 | 2,3,5,6,7,8<br>,9,15     | 9  | O54728,O70594,P19132,P35280,P36376,P50115,P50116,Q62714,Q99MH3                                                                                                          |
| 5639 | 1,4,10,11,<br>12,13,15,1<br>6 | 2,3,5,6,7,8<br>,9,14     | 5  | P08937,P50115,P50116,Q5QE79,Q63751                                                                                                                                      |
| 5640 | 1,4,10,11,<br>12,14,15,1<br>6 | 2,3,5,6,7,8<br>,9,13     | 4  | P08937,P50115,P50116,Q5QE79                                                                                                                                             |
| 5641 | 1,4,10,11,<br>13,14,15,1<br>6 | 2,3,5,6,7,8<br>,9,12     | 5  | O54728,P08937,P50115,P50116,Q5QE79                                                                                                                                      |
| 5642 | 1,4,10,12,<br>13,14,15,1<br>6 | 2,3,5,6,7,8<br>,9,11     | 8  | P06760,P08937,P35280,P50115,P50116,Q5QE79,Q6P6R2,Q6P6S4                                                                                                                 |
| 5643 | 1,4,11,12,<br>13,14,15,1<br>6 | 2,3,5,6,7,8<br>,9,10     | 15 | D3ZTX0,O54728,O70594,P02454,P02631,P08937,P17559,P20766,P25031,P50115,P50116,P70545,Q4FZU6,Q5QE79,Q6P6R2                                                                |
| 5644 | 1,5,6,7,8,9<br>,10,11         | 2,3,4,12,1<br>3,14,15,16 | 8  | P06760,P18421,P25031,P29315,P35745,P49134,Q63493,Q6P6R2                                                                                                                 |
| 5645 | 1,5,6,7,8,9<br>,10,12         | 2,3,4,11,1<br>3,14,15,16 | 5  | P00762,P25031,P29315,P35745,P36860                                                                                                                                      |
| 5646 | 1,5,6,7,8,9<br>,10,13         | 2,3,4,11,1<br>2,14,15,16 | 4  | P25031,P29315,P35745,P36860                                                                                                                                             |
| 5647 | 1,5,6,7,8,9<br>,10,14         | 2,3,4,11,1<br>2,13,15,16 | 4  | P00762,P25031,P29315,P35745                                                                                                                                             |
| 5648 | 1,5,6,7,8,9<br>,10,15         | 2,3,4,11,1<br>2,13,14,16 | 8  | P00762,P19132,P19629,P25031,P35745,P36860,Q63474,Q9Z0V6                                                                                                                 |



|      |                        |                          |    |                                                                                                                               |
|------|------------------------|--------------------------|----|-------------------------------------------------------------------------------------------------------------------------------|
| 5649 | 1,5,6,7,8,9<br>,10,16  | 2,3,4,11,1<br>2,13,14,15 | 3  | P25031,P35745,P70545                                                                                                          |
| 5650 | 1,5,6,7,8,9<br>,11,12  | 2,3,4,10,1<br>3,14,15,16 | 10 | iRT-Kit_WR_fusion,P06760,P06911,P22283,P29315,P35745,Q03191,Q63493,Q812E4,Q9QW07                                              |
| 5651 | 1,5,6,7,8,9<br>,11,13  | 2,3,4,10,1<br>2,14,15,16 | 8  | P06760,P09456,P22283,P29315,Q09326,Q63493,Q63617,Q812E4                                                                       |
| 5652 | 1,5,6,7,8,9<br>,11,14  | 2,3,4,10,1<br>2,13,15,16 | 5  | P06760,P29315,Q09326,Q63493,Q812E4                                                                                            |
| 5653 | 1,5,6,7,8,9<br>,11,15  | 2,3,4,10,1<br>2,13,14,16 | 8  | P06760,P35745,P49134,Q63493,Q6IMF3,Q6P6S4,Q8CJ52,Q9QW07                                                                       |
| 5654 | 1,5,6,7,8,9<br>,11,16  | 2,3,4,10,1<br>2,13,14,15 | 18 | P02780,P02781,P02782,P04905,P06760,P06761,P08723,P09456,P22283,P30120,P46462,P49134,Q5M8C6,Q63493,Q63617,Q812E4,Q9JHB9,Q9QW07 |
| 5655 | 1,5,6,7,8,9<br>,12,13  | 2,3,4,10,1<br>1,14,15,16 | 2  | P29315,P35745                                                                                                                 |
| 5656 | 1,5,6,7,8,9<br>,12,14  | 2,3,4,10,1<br>1,13,15,16 | 2  | P29315,P35745                                                                                                                 |
| 5657 | 1,5,6,7,8,9<br>,12,15  | 2,3,4,10,1<br>1,13,14,16 | 3  | iRT-Kit_WR_fusion,P19132,P35745                                                                                               |
| 5658 | 1,5,6,7,8,9<br>,12,16  | 2,3,4,10,1<br>1,13,14,15 | 3  | iRT-Kit_WR_fusion,P21674,P35745                                                                                               |
| 5659 | 1,5,6,7,8,9<br>,13,14  | 2,3,4,10,1<br>1,12,15,16 | 1  | P29315                                                                                                                        |
| 5660 | 1,5,6,7,8,9<br>,13,15  | 2,3,4,10,1<br>1,12,14,16 | 1  | P35745                                                                                                                        |
| 5661 | 1,5,6,7,8,9<br>,13,16  | 2,3,4,10,1<br>1,12,14,15 | 0  |                                                                                                                               |
| 5662 | 1,5,6,7,8,9<br>,14,15  | 2,3,4,10,1<br>1,12,13,16 | 1  | P35745                                                                                                                        |
| 5663 | 1,5,6,7,8,9<br>,14,16  | 2,3,4,10,1<br>1,12,13,15 | 0  |                                                                                                                               |
| 5664 | 1,5,6,7,8,9<br>,15,16  | 2,3,4,10,1<br>1,12,13,14 | 2  | P13432,P35745                                                                                                                 |
| 5665 | 1,5,6,7,8,1<br>0,11,12 | 2,3,4,9,13,<br>14,15,16  | 5  | P22283,P29315,P31044,Q5I0D1,Q63493                                                                                            |
| 5666 | 1,5,6,7,8,1<br>0,11,13 | 2,3,4,9,12,<br>14,15,16  | 5  | P06761,P22283,P29315,P31044,Q63493                                                                                            |
| 5667 | 1,5,6,7,8,1<br>0,11,14 | 2,3,4,9,12,<br>13,15,16  | 3  | P19218,P29315,P31044                                                                                                          |
| 5668 | 1,5,6,7,8,1<br>0,11,15 | 2,3,4,9,12,<br>13,14,16  | 8  | P02793;Q7TP54,P19629,P31044,P35745,Q63493,Q6IMF3,Q6P6Q2,Q8CJ52                                                                |

|      |                        |                         |    |                                                                                                                                                               |
|------|------------------------|-------------------------|----|---------------------------------------------------------------------------------------------------------------------------------------------------------------|
| 5669 | 1,5,6,7,8,1<br>0,11,16 | 2,3,4,9,12,<br>13,14,15 | 17 | P02780,P02781,P02782,P04905,P06761,P07647,P08010,P08723,P09456,P22283,P25031,P30120<br>,P46462,Q5M8C6,Q63493,Q9JHB9,Q9QW07                                    |
| 5670 | 1,5,6,7,8,1<br>0,12,13 | 2,3,4,9,11,<br>14,15,16 | 6  | P19814,P25031,P29315,P31044,P35745,P36860                                                                                                                     |
| 5671 | 1,5,6,7,8,1<br>0,12,14 | 2,3,4,9,11,<br>13,15,16 | 6  | P19814,P25031,P29315,P35745,P57113,Q5RLM2                                                                                                                     |
| 5672 | 1,5,6,7,8,1<br>0,12,15 | 2,3,4,9,11,<br>13,14,16 | 7  | P19132,P19629,P19814,P25031,P29315,P35745,P36860                                                                                                              |
| 5673 | 1,5,6,7,8,1<br>0,12,16 | 2,3,4,9,11,<br>13,14,15 | 5  | P0DMW0;P0DMW1,P19629,P25031,P35745,P57113                                                                                                                     |
| 5674 | 1,5,6,7,8,1<br>0,13,14 | 2,3,4,9,11,<br>12,15,16 | 4  | P25031,P29315,P57113,Q62714                                                                                                                                   |
| 5675 | 1,5,6,7,8,1<br>0,13,15 | 2,3,4,9,11,<br>12,14,16 | 5  | P29315,P35745,P36860,P57113,Q62714                                                                                                                            |
| 5676 | 1,5,6,7,8,1<br>0,13,16 | 2,3,4,9,11,<br>12,14,15 | 3  | O35077,P25031,P57113                                                                                                                                          |
| 5677 | 1,5,6,7,8,1<br>0,14,15 | 2,3,4,9,11,<br>12,13,16 | 5  | P29315,P35745,P54921,P57113,Q62714                                                                                                                            |
| 5678 | 1,5,6,7,8,1<br>0,14,16 | 2,3,4,9,11,<br>12,13,15 | 3  | O35077,P25031,P57113                                                                                                                                          |
| 5679 | 1,5,6,7,8,1<br>0,15,16 | 2,3,4,9,11,<br>12,13,14 | 13 | B2RYW9,O35077,O70594,P13432,P19629,P25031,P35745,P53790,P57113,Q03248,Q05175,Q64<br>335,Q8R431                                                                |
| 5680 | 1,5,6,7,8,1<br>1,12,13 | 2,3,4,9,10,<br>14,15,16 | 12 | P06761,P06911,P12020,P22283,P29315,P46462,P47967,Q09326,Q5GRG2,Q5I0D1,Q63493,Q9JI<br>85                                                                       |
| 5681 | 1,5,6,7,8,1<br>1,12,14 | 2,3,4,9,10,<br>13,15,16 | 10 | P06911,P12020,P19218,P22283,P29315,P46462,Q09326,Q5GRG2,Q63493,Q9QW07                                                                                         |
| 5682 | 1,5,6,7,8,1<br>1,12,15 | 2,3,4,9,10,<br>13,14,16 | 9  | P22283,P35745,Q5GRG2,Q63493,Q6IG05,Q6IMF3,Q6P6Q2,Q8CJ52,Q9QW07                                                                                                |
| 5683 | 1,5,6,7,8,1<br>1,12,16 | 2,3,4,9,10,<br>13,14,15 | 22 | O35547,P02780,P02781,P02782,P04905,P06761,P06911,P07647,P08010,P08723,P09456,P1202<br>0,P22283,P30120,P36374,P46462,Q5GRG2,Q5M8C6,Q63493,Q8CFN2,Q9JHB9,Q9QW07 |
| 5684 | 1,5,6,7,8,1<br>1,13,14 | 2,3,4,9,10,<br>12,15,16 | 9  | P06761,P19218,P22283,P29315,P46462,Q09326,Q5GRG2,Q63493,Q99041                                                                                                |
| 5685 | 1,5,6,7,8,1<br>1,13,15 | 2,3,4,9,10,<br>12,14,16 | 7  | P01041,P22283,Q09326,Q63493,Q6IMF3,Q6P6Q2,Q8CJ52                                                                                                              |
| 5686 | 1,5,6,7,8,1<br>1,13,16 | 2,3,4,9,10,<br>12,14,15 | 19 | O35547,P02780,P02781,P02782,P06761,P07647,P08010,P08723,P09456,P22283,P24368,P3012<br>0,P46462,Q5M8C6,Q63493,Q63617,Q99041,Q9JHB9,Q9JI85                      |
| 5687 | 1,5,6,7,8,1<br>1,14,15 | 2,3,4,9,10,<br>12,13,16 | 8  | P19218,Q4FZU2,Q5GRG2,Q63493,Q6IMF3,Q6P6Q2,Q8CJ52,Q9QW07                                                                                                       |
| 5688 | 1,5,6,7,8,1<br>1,14,16 | 2,3,4,9,10,<br>12,13,15 | 22 | P02780,P02781,P02782,P04905,P06761,P07647,P08010,P08723,P09456,P0C0A9,P19218,P2228<br>3,P30120,P46462,Q5GRG2,Q5M8C6,Q63493,Q812E4,Q8CFN2,Q99041,Q9JHB9,Q9QW07 |

|      |                        |                         |    |                                                                                                                                                 |
|------|------------------------|-------------------------|----|-------------------------------------------------------------------------------------------------------------------------------------------------|
| 5689 | 1,5,6,7,8,1<br>1,15,16 | 2,3,4,9,10,<br>12,13,14 | 20 | B2RYW9,P02780,P02781,P02782,P06761,P08010,P08723,P09456,P0C0A9,P22283,P30120,P4646<br>2,Q4FZU2,Q63493,Q6IMF3,Q6P6Q2,Q8CJ52,Q9JHB9,Q9QW07,Q9QZK9 |
| 5690 | 1,5,6,7,8,1<br>2,13,14 | 2,3,4,9,10,<br>11,15,16 | 3  | P19218,P29315,Q9Z2L0                                                                                                                            |
| 5691 | 1,5,6,7,8,1<br>2,13,15 | 2,3,4,9,10,<br>11,14,16 | 4  | P19814,P29315,P35745,P70549                                                                                                                     |
| 5692 | 1,5,6,7,8,1<br>2,13,16 | 2,3,4,9,10,<br>11,14,15 | 0  |                                                                                                                                                 |
| 5693 | 1,5,6,7,8,1<br>2,14,15 | 2,3,4,9,10,<br>11,13,16 | 5  | D3ZUC6,P19218,P19814,P29315,P35745                                                                                                              |
| 5694 | 1,5,6,7,8,1<br>2,14,16 | 2,3,4,9,10,<br>11,13,15 | 1  | P19218                                                                                                                                          |
| 5695 | 1,5,6,7,8,1<br>2,15,16 | 2,3,4,9,10,<br>11,13,14 | 2  | P19629,P35745                                                                                                                                   |
| 5696 | 1,5,6,7,8,1<br>3,14,15 | 2,3,4,9,10,<br>11,12,16 | 4  | P29315,P70549,Q62714,Q9Z2L0                                                                                                                     |
| 5697 | 1,5,6,7,8,1<br>3,14,16 | 2,3,4,9,10,<br>11,12,15 | 1  | Q62714                                                                                                                                          |
| 5698 | 1,5,6,7,8,1<br>3,15,16 | 2,3,4,9,10,<br>11,12,14 | 1  | Q62714                                                                                                                                          |
| 5699 | 1,5,6,7,8,1<br>4,15,16 | 2,3,4,9,10,<br>11,12,13 | 2  | P13432,Q62714                                                                                                                                   |
| 5700 | 1,5,6,7,9,1<br>0,11,12 | 2,3,4,8,13,<br>14,15,16 | 4  | B0BNN3,P00762,P29315,Q03191                                                                                                                     |
| 5701 | 1,5,6,7,9,1<br>0,11,13 | 2,3,4,8,12,<br>14,15,16 | 2  | P00762,P29315                                                                                                                                   |
| 5702 | 1,5,6,7,9,1<br>0,11,14 | 2,3,4,8,12,<br>13,15,16 | 3  | P00762,P00774,P29315                                                                                                                            |
| 5703 | 1,5,6,7,9,1<br>0,11,15 | 2,3,4,8,12,<br>13,14,16 | 2  | P00762,P35745                                                                                                                                   |
| 5704 | 1,5,6,7,9,1<br>0,11,16 | 2,3,4,8,12,<br>13,14,15 | 0  |                                                                                                                                                 |
| 5705 | 1,5,6,7,9,1<br>0,12,13 | 2,3,4,8,11,<br>14,15,16 | 5  | P00762,P29315,P35745,P36860,Q03191                                                                                                              |
| 5706 | 1,5,6,7,9,1<br>0,12,14 | 2,3,4,8,11,<br>13,15,16 | 5  | P00762,P00774,P05539,P29315,P35745                                                                                                              |
| 5707 | 1,5,6,7,9,1<br>0,12,15 | 2,3,4,8,11,<br>13,14,16 | 4  | B0BNN3,O54728,P00762,P35745                                                                                                                     |
| 5708 | 1,5,6,7,9,1<br>0,12,16 | 2,3,4,8,11,<br>13,14,15 | 1  | Q03191                                                                                                                                          |

|      |                        |                         |   |                                                  |
|------|------------------------|-------------------------|---|--------------------------------------------------|
| 5709 | 1,5,6,7,9,1<br>0,13,14 | 2,3,4,8,11,<br>12,15,16 | 5 | P00762,P00774,P05539,P29315,Q5PQL7               |
| 5710 | 1,5,6,7,9,1<br>0,13,15 | 2,3,4,8,11,<br>12,14,16 | 3 | P00762,P35745,P36860                             |
| 5711 | 1,5,6,7,9,1<br>0,13,16 | 2,3,4,8,11,<br>12,14,15 | 1 | P11883                                           |
| 5712 | 1,5,6,7,9,1<br>0,14,15 | 2,3,4,8,11,<br>12,13,16 | 5 | P00762,P00774,P02625,P05539,P35745               |
| 5713 | 1,5,6,7,9,1<br>0,14,16 | 2,3,4,8,11,<br>12,13,15 | 2 | P00762,P00774                                    |
| 5714 | 1,5,6,7,9,1<br>0,15,16 | 2,3,4,8,11,<br>12,13,14 | 4 | P00762,P35745,Q64335,Q811M5                      |
| 5715 | 1,5,6,7,9,1<br>1,12,13 | 2,3,4,8,10,<br>14,15,16 | 5 | P00762,P20762,P29315,Q03191,Q62761;Q62762;Q62763 |
| 5716 | 1,5,6,7,9,1<br>1,12,14 | 2,3,4,8,10,<br>13,15,16 | 4 | P00762,P29315,Q03191,Q64093                      |
| 5717 | 1,5,6,7,9,1<br>1,12,15 | 2,3,4,8,10,<br>13,14,16 | 4 | P00762,P35745,Q03191,Q62761;Q62762;Q62763        |
| 5718 | 1,5,6,7,9,1<br>1,12,16 | 2,3,4,8,10,<br>13,14,15 | 1 | Q03191                                           |
| 5719 | 1,5,6,7,9,1<br>1,13,14 | 2,3,4,8,10,<br>12,15,16 | 3 | P00762,P0DMW0;P0DMW1,P29315                      |
| 5720 | 1,5,6,7,9,1<br>1,13,15 | 2,3,4,8,10,<br>12,14,16 | 1 | P00762                                           |
| 5721 | 1,5,6,7,9,1<br>1,13,16 | 2,3,4,8,10,<br>12,14,15 | 0 |                                                  |
| 5722 | 1,5,6,7,9,1<br>1,14,15 | 2,3,4,8,10,<br>12,13,16 | 4 | P00762,P02625,P0DMW0;P0DMW1,Q8CJ52               |
| 5723 | 1,5,6,7,9,1<br>1,14,16 | 2,3,4,8,10,<br>12,13,15 | 1 | Q9R168                                           |
| 5724 | 1,5,6,7,9,1<br>1,15,16 | 2,3,4,8,10,<br>12,13,14 | 1 | Q8CJ52                                           |
| 5725 | 1,5,6,7,9,1<br>2,13,14 | 2,3,4,8,10,<br>11,15,16 | 3 | P00762,P05539,P29315                             |
| 5726 | 1,5,6,7,9,1<br>2,13,15 | 2,3,4,8,10,<br>11,14,16 | 2 | P00762,P35745                                    |
| 5727 | 1,5,6,7,9,1<br>2,13,16 | 2,3,4,8,10,<br>11,14,15 | 1 | Q03191                                           |
| 5728 | 1,5,6,7,9,1<br>2,14,15 | 2,3,4,8,10,<br>11,13,16 | 6 | P00762,P00774,P02625,P05539,P35745,Q5BJY9        |

|      |                         |                         |                                             |
|------|-------------------------|-------------------------|---------------------------------------------|
| 5729 | 1,5,6,7,9,1<br>2,14,16  | 2,3,4,8,10,<br>11,13,15 | 1 P00774                                    |
| 5730 | 1,5,6,7,9,1<br>2,15,16  | 2,3,4,8,10,<br>11,13,14 | 1 P35745                                    |
| 5731 | 1,5,6,7,9,1<br>3,14,15  | 2,3,4,8,10,<br>11,12,16 | 6 P00762,P00774,P01835,P02625,P05539,Q5PQL7 |
| 5732 | 1,5,6,7,9,1<br>3,14,16  | 2,3,4,8,10,<br>11,12,15 | 1 P00774                                    |
| 5733 | 1,5,6,7,9,1<br>3,15,16  | 2,3,4,8,10,<br>11,12,14 | 0                                           |
| 5734 | 1,5,6,7,9,1<br>4,15,16  | 2,3,4,8,10,<br>11,12,13 | 1 P00774                                    |
| 5735 | 1,5,6,7,10,<br>11,12,13 | 2,3,4,8,9,1<br>4,15,16  | 5 P00774,P23593,P29315,P47967,Q5I0D1        |
| 5736 | 1,5,6,7,10,<br>11,12,14 | 2,3,4,8,9,1<br>3,15,16  | 4 P00762,P00774,P23593,P29315               |
| 5737 | 1,5,6,7,10,<br>11,12,15 | 2,3,4,8,9,1<br>3,14,16  | 3 P00762,P00774,P23593                      |
| 5738 | 1,5,6,7,10,<br>11,12,16 | 2,3,4,8,9,1<br>3,14,15  | 1 P00774                                    |
| 5739 | 1,5,6,7,10,<br>11,13,14 | 2,3,4,8,9,1<br>2,15,16  | 5 P00762,P00774,P05539,P29315,P36376        |
| 5740 | 1,5,6,7,10,<br>11,13,15 | 2,3,4,8,9,1<br>2,14,16  | 2 P00762,P00774                             |
| 5741 | 1,5,6,7,10,<br>11,13,16 | 2,3,4,8,9,1<br>2,14,15  | 2 P00774,P36376                             |
| 5742 | 1,5,6,7,10,<br>11,14,15 | 2,3,4,8,9,1<br>2,13,16  | 2 P00762,P00774                             |
| 5743 | 1,5,6,7,10,<br>11,14,16 | 2,3,4,8,9,1<br>2,13,15  | 2 P00774,P36376                             |
| 5744 | 1,5,6,7,10,<br>11,15,16 | 2,3,4,8,9,1<br>2,13,14  | 2 P00774,P17988                             |
| 5745 | 1,5,6,7,10,<br>12,13,14 | 2,3,4,8,9,1<br>1,15,16  | 5 P00762,P00774,P01835,P05539,P29315        |
| 5746 | 1,5,6,7,10,<br>12,13,15 | 2,3,4,8,9,1<br>1,14,16  | 6 P00762,P00774,P01835,P19814,P35745,P36860 |
| 5747 | 1,5,6,7,10,<br>12,13,16 | 2,3,4,8,9,1<br>1,14,15  | 3 P00774,P01835,P36376                      |
| 5748 | 1,5,6,7,10,<br>12,14,15 | 2,3,4,8,9,1<br>1,13,16  | 4 P00762,P00774,P05539,P35745               |

|      |                                             |                                                    |
|------|---------------------------------------------|----------------------------------------------------|
| 5749 | 1,5,6,7,10, 2,3,4,8,9,1<br>12,14,16 1,13,15 | 1 P00774                                           |
| 5750 | 1,5,6,7,10, 2,3,4,8,9,1<br>12,15,16 1,13,14 | 2 P00774,Q64335                                    |
| 5751 | 1,5,6,7,10, 2,3,4,8,9,1<br>13,14,15 1,12,16 | 7 O88797,P00762,P00774,P01835,P05539,Q5PQL7,Q62714 |
| 5752 | 1,5,6,7,10, 2,3,4,8,9,1<br>13,14,16 1,12,15 | 4 P00774,P01835,P36376,P57113                      |
| 5753 | 1,5,6,7,10, 2,3,4,8,9,1<br>13,15,16 1,12,14 | 3 P00774,P01835,P11883                             |
| 5754 | 1,5,6,7,10, 2,3,4,8,9,1<br>14,15,16 1,12,13 | 3 P00774,P57113,Q64335                             |
| 5755 | 1,5,6,7,11, 2,3,4,8,9,1<br>12,13,14 0,15,16 | 3 P00774,P19218,P29315                             |
| 5756 | 1,5,6,7,11, 2,3,4,8,9,1<br>12,13,15 0,14,16 | 0                                                  |
| 5757 | 1,5,6,7,11, 2,3,4,8,9,1<br>12,13,16 0,14,15 | 2 P22283,P47967                                    |
| 5758 | 1,5,6,7,11, 2,3,4,8,9,1<br>12,14,15 0,13,16 | 2 P00774,P19218                                    |
| 5759 | 1,5,6,7,11, 2,3,4,8,9,1<br>12,14,16 0,13,15 | 2 P00774,P19218                                    |
| 5760 | 1,5,6,7,11, 2,3,4,8,9,1<br>12,15,16 0,13,14 | 2 Q8CJ52,Q9QW07                                    |
| 5761 | 1,5,6,7,11, 2,3,4,8,9,1<br>13,14,15 0,12,16 | 3 P00774,P01835,P05539                             |
| 5762 | 1,5,6,7,11, 2,3,4,8,9,1<br>13,14,16 0,12,15 | 3 P00774,P34901,P36376                             |
| 5763 | 1,5,6,7,11, 2,3,4,8,9,1<br>13,15,16 0,12,14 | 2 O70417,Q8CJ52                                    |
| 5764 | 1,5,6,7,11, 2,3,4,8,9,1<br>14,15,16 0,12,13 | 2 P00774,Q8CJ52                                    |
| 5765 | 1,5,6,7,12, 2,3,4,8,9,1<br>13,14,15 0,11,16 | 4 P00774,P01835,P05539,P70549                      |
| 5766 | 1,5,6,7,12, 2,3,4,8,9,1<br>13,14,16 0,11,15 | 3 P00774,P01835,P36376                             |
| 5767 | 1,5,6,7,12, 2,3,4,8,9,1<br>13,15,16 0,11,14 | 2 P00774,P01835                                    |
| 5768 | 1,5,6,7,12, 2,3,4,8,9,1<br>14,15,16 0,11,13 | 1 P00774                                           |

|      |                                             |                                                                         |
|------|---------------------------------------------|-------------------------------------------------------------------------|
| 5769 | 1,5,6,7,13, 2,3,4,8,9,1<br>14,15,16 0,11,12 | 4 P00774,P01835,Q5PQL7,Q62714                                           |
| 5770 | 1,5,6,8,9,1 2,3,4,7,13,<br>0,11,12 14,15,16 | 3 P29315,P35745,Q03191                                                  |
| 5771 | 1,5,6,8,9,1 2,3,4,7,12,<br>0,11,13 14,15,16 | 2 BOLT89,P29315                                                         |
| 5772 | 1,5,6,8,9,1 2,3,4,7,12,<br>0,11,14 13,15,16 | 1 P29315                                                                |
| 5773 | 1,5,6,8,9,1 2,3,4,7,12,<br>0,11,15 13,14,16 | 2 P35745,Q6P6S4                                                         |
| 5774 | 1,5,6,8,9,1 2,3,4,7,12,<br>0,11,16 13,14,15 | 1 P25031                                                                |
| 5775 | 1,5,6,8,9,1 2,3,4,7,11,<br>0,12,13 14,15,16 | 3 P25031,P29315,P35745                                                  |
| 5776 | 1,5,6,8,9,1 2,3,4,7,11,<br>0,12,14 13,15,16 | 3 P25031,P29315,P35745                                                  |
| 5777 | 1,5,6,8,9,1 2,3,4,7,11,<br>0,12,15 13,14,16 | 3 B0BNN3,P25031,P35745                                                  |
| 5778 | 1,5,6,8,9,1 2,3,4,7,11,<br>0,12,16 13,14,15 | 2 P25031,P35745                                                         |
| 5779 | 1,5,6,8,9,1 2,3,4,7,11,<br>0,13,14 12,15,16 | 2 P25031,P29315                                                         |
| 5780 | 1,5,6,8,9,1 2,3,4,7,11,<br>0,13,15 12,14,16 | 1 P35745                                                                |
| 5781 | 1,5,6,8,9,1 2,3,4,7,11,<br>0,13,16 12,14,15 | 1 P25031                                                                |
| 5782 | 1,5,6,8,9,1 2,3,4,7,11,<br>0,14,15 12,13,16 | 1 P35745                                                                |
| 5783 | 1,5,6,8,9,1 2,3,4,7,11,<br>0,14,16 12,13,15 | 1 P25031                                                                |
| 5784 | 1,5,6,8,9,1 2,3,4,7,11,<br>0,15,16 12,13,14 | 3 P25031,P35745,Q811M5                                                  |
| 5785 | 1,5,6,8,9,1 2,3,4,7,10,<br>1,12,13 14,15,16 | 7 BOLT89,P18297,P29315,P61206;P84079,P63095,Q03191,Q5RKI1               |
| 5786 | 1,5,6,8,9,1 2,3,4,7,10,<br>1,12,14 13,15,16 | 9 P18297,P19468,P20766,P61206;P84079,P63095,Q5I0J9,Q5RKI1,Q63424,Q64093 |
| 5787 | 1,5,6,8,9,1 2,3,4,7,10,<br>1,12,15 13,14,16 | 2 P18297,P35745                                                         |
| 5788 | 1,5,6,8,9,1 2,3,4,7,10,<br>1,12,16 13,14,15 | 5 O88797,P63095,Q03191,Q5RKI1,Q9QW07                                    |

|      |                         |                         |                                                    |
|------|-------------------------|-------------------------|----------------------------------------------------|
| 5789 | 1,5,6,8,9,1<br>1,13,14  | 2,3,4,7,10,<br>12,15,16 | 6 P0DMW0;P0DMW1,P10758,P18297,P20766,Q5RKI1,Q64093 |
| 5790 | 1,5,6,8,9,1<br>1,13,15  | 2,3,4,7,10,<br>12,14,16 | 0                                                  |
| 5791 | 1,5,6,8,9,1<br>1,13,16  | 2,3,4,7,10,<br>12,14,15 | 2 P30120,Q5RKI1                                    |
| 5792 | 1,5,6,8,9,1<br>1,14,15  | 2,3,4,7,10,<br>12,13,16 | 0                                                  |
| 5793 | 1,5,6,8,9,1<br>1,14,16  | 2,3,4,7,10,<br>12,13,15 | 3 Q5I0J9,Q5RKI1,Q812E4                             |
| 5794 | 1,5,6,8,9,1<br>1,15,16  | 2,3,4,7,10,<br>12,13,14 | 1 Q9QW07                                           |
| 5795 | 1,5,6,8,9,1<br>2,13,14  | 2,3,4,7,10,<br>11,15,16 | 3 P17988,P20766,P29315                             |
| 5796 | 1,5,6,8,9,1<br>2,13,15  | 2,3,4,7,10,<br>11,14,16 | 1 P35745                                           |
| 5797 | 1,5,6,8,9,1<br>2,13,16  | 2,3,4,7,10,<br>11,14,15 | 1 Q5RKI1                                           |
| 5798 | 1,5,6,8,9,1<br>2,14,15  | 2,3,4,7,10,<br>11,13,16 | 4 P00714,P20766,P28570,P35745                      |
| 5799 | 1,5,6,8,9,1<br>2,14,16  | 2,3,4,7,10,<br>11,13,15 | 2 P21674,Q5RKI1                                    |
| 5800 | 1,5,6,8,9,1<br>2,15,16  | 2,3,4,7,10,<br>11,13,14 | 1 P35745                                           |
| 5801 | 1,5,6,8,9,1<br>3,14,15  | 2,3,4,7,10,<br>11,12,16 | 2 P20766,Q00715                                    |
| 5802 | 1,5,6,8,9,1<br>3,14,16  | 2,3,4,7,10,<br>11,12,15 | 2 P20766,Q5RKI1                                    |
| 5803 | 1,5,6,8,9,1<br>3,15,16  | 2,3,4,7,10,<br>11,12,14 | 0                                                  |
| 5804 | 1,5,6,8,9,1<br>4,15,16  | 2,3,4,7,10,<br>11,12,13 | 2 P47967,P97840                                    |
| 5805 | 1,5,6,8,10,<br>11,12,13 | 2,3,4,7,9,1<br>4,15,16  | 1 P29315                                           |
| 5806 | 1,5,6,8,10,<br>11,12,14 | 2,3,4,7,9,1<br>3,15,16  | 2 P19218,P29315                                    |
| 5807 | 1,5,6,8,10,<br>11,12,15 | 2,3,4,7,9,1<br>3,14,16  | 0                                                  |
| 5808 | 1,5,6,8,10,<br>11,12,16 | 2,3,4,7,9,1<br>3,14,15  | 1 P25031                                           |



|      |                                             |                                      |
|------|---------------------------------------------|--------------------------------------|
| 5809 | 1,5,6,8,10, 2,3,4,7,9,1<br>11,13,14 2,15,16 | 1 P29315                             |
| 5810 | 1,5,6,8,10, 2,3,4,7,9,1<br>11,13,15 2,14,16 | 0                                    |
| 5811 | 1,5,6,8,10, 2,3,4,7,9,1<br>11,13,16 2,14,15 | 1 P30120                             |
| 5812 | 1,5,6,8,10, 2,3,4,7,9,1<br>11,14,15 2,13,16 | 0                                    |
| 5813 | 1,5,6,8,10, 2,3,4,7,9,1<br>11,14,16 2,13,15 | 0                                    |
| 5814 | 1,5,6,8,10, 2,3,4,7,9,1<br>11,15,16 2,13,14 | 1 Q6IMF3                             |
| 5815 | 1,5,6,8,10, 2,3,4,7,9,1<br>12,13,14 1,15,16 | 3 P25031,P29315,P35280               |
| 5816 | 1,5,6,8,10, 2,3,4,7,9,1<br>12,13,15 1,14,16 | 3 P19814,P35745,P70549               |
| 5817 | 1,5,6,8,10, 2,3,4,7,9,1<br>12,13,16 1,14,15 | 2 P25031,P35280                      |
| 5818 | 1,5,6,8,10, 2,3,4,7,9,1<br>12,14,15 1,13,16 | 2 P35745,P54921                      |
| 5819 | 1,5,6,8,10, 2,3,4,7,9,1<br>12,14,16 1,13,15 | 2 P25031,P35280                      |
| 5820 | 1,5,6,8,10, 2,3,4,7,9,1<br>12,15,16 1,13,14 | 3 P0DMW0;P0DMW1,P25031,P35745        |
| 5821 | 1,5,6,8,10, 2,3,4,7,9,1<br>13,14,15 1,12,16 | 0                                    |
| 5822 | 1,5,6,8,10, 2,3,4,7,9,1<br>13,14,16 1,12,15 | 3 P14668,P25031,P35280               |
| 5823 | 1,5,6,8,10, 2,3,4,7,9,1<br>13,15,16 1,12,14 | 0                                    |
| 5824 | 1,5,6,8,10, 2,3,4,7,9,1<br>14,15,16 1,12,13 | 2 P00774,P54921                      |
| 5825 | 1,5,6,8,11, 2,3,4,7,9,1<br>12,13,14 0,15,16 | 5 P19218,P20766,P29315,Q5RKI1,Q8K1G0 |
| 5826 | 1,5,6,8,11, 2,3,4,7,9,1<br>12,13,15 0,14,16 | 0                                    |
| 5827 | 1,5,6,8,11, 2,3,4,7,9,1<br>12,13,16 0,14,15 | 4 O35547,P02782,P30120,Q5RKI1        |
| 5828 | 1,5,6,8,11, 2,3,4,7,9,1<br>12,14,15 0,13,16 | 2 P19218,P20766                      |

|      |                                             |                                                                         |
|------|---------------------------------------------|-------------------------------------------------------------------------|
| 5829 | 1,5,6,8,11, 2,3,4,7,9,1<br>12,14,16 0,13,15 | 5 P19218,P20766,Q5RKI1,Q8CFN2,Q9QW07                                    |
| 5830 | 1,5,6,8,11, 2,3,4,7,9,1<br>12,15,16 0,13,14 | 2 Q6IMF3,Q9QW07                                                         |
| 5831 | 1,5,6,8,11, 2,3,4,7,9,1<br>13,14,15 0,12,16 | 2 P19218,P20766                                                         |
| 5832 | 1,5,6,8,11, 2,3,4,7,9,1<br>13,14,16 0,12,15 | 4 P19218,P20766,P30120,Q5RKI1                                           |
| 5833 | 1,5,6,8,11, 2,3,4,7,9,1<br>13,15,16 0,12,14 | 1 P30120                                                                |
| 5834 | 1,5,6,8,11, 2,3,4,7,9,1<br>14,15,16 0,12,13 | 2 P19218,Q6IMF3                                                         |
| 5835 | 1,5,6,8,12, 2,3,4,7,9,1<br>13,14,15 0,11,16 | 2 P20766,P70549                                                         |
| 5836 | 1,5,6,8,12, 2,3,4,7,9,1<br>13,14,16 0,11,15 | 3 P20766,P35280,Q5RKI1                                                  |
| 5837 | 1,5,6,8,12, 2,3,4,7,9,1<br>13,15,16 0,11,14 | 0                                                                       |
| 5838 | 1,5,6,8,12, 2,3,4,7,9,1<br>14,15,16 0,11,13 | 1 P20766                                                                |
| 5839 | 1,5,6,8,13, 2,3,4,7,9,1<br>14,15,16 0,11,12 | 2 P20766,Q62714                                                         |
| 5840 | 1,5,6,9,10, 2,3,4,7,8,1<br>11,12,13 4,15,16 | 6 B0LT89,P00762,P20761,P20762,Q03191,Q62761;Q62762;Q62763               |
| 5841 | 1,5,6,9,10, 2,3,4,7,8,1<br>11,12,14 3,15,16 | 7 P00762,P00774,P20761,Q03191,Q5I0J9,Q64093,Q8CIZ5                      |
| 5842 | 1,5,6,9,10, 2,3,4,7,8,1<br>11,12,15 3,14,16 | 8 B0BNN3,D4A5U3,P00762,P20761,Q03191,Q62761;Q62762;Q62763,Q8CIZ5,Q9WUW8 |
| 5843 | 1,5,6,9,10, 2,3,4,7,8,1<br>11,12,16 3,14,15 | 4 B0BNN3,P20761,Q03191,Q8CIZ5                                           |
| 5844 | 1,5,6,9,10, 2,3,4,7,8,1<br>11,13,14 2,15,16 | 4 B0LT89,P00762,P00774,P20761                                           |
| 5845 | 1,5,6,9,10, 2,3,4,7,8,1<br>11,13,15 2,14,16 | 4 B0LT89,O70417,P00762,P20761                                           |
| 5846 | 1,5,6,9,10, 2,3,4,7,8,1<br>11,13,16 2,14,15 | 2 O70417,Q8CIZ5                                                         |
| 5847 | 1,5,6,9,10, 2,3,4,7,8,1<br>11,14,15 2,13,16 | 5 D4A5U3,P00762,P00774,P20761,Q8CIZ5                                    |
| 5848 | 1,5,6,9,10, 2,3,4,7,8,1<br>11,14,16 2,13,15 | 2 P00774,Q8CIZ5                                                         |

|      |                                             |                                                                                                                                                                                                                                                                                                                 |
|------|---------------------------------------------|-----------------------------------------------------------------------------------------------------------------------------------------------------------------------------------------------------------------------------------------------------------------------------------------------------------------|
| 5849 | 1,5,6,9,10, 2,3,4,7,8,1<br>11,15,16 2,13,14 | 6 B0BNN3,D4A5U3,O70417,P00774,Q811M5,Q8CIZ5                                                                                                                                                                                                                                                                     |
| 5850 | 1,5,6,9,10, 2,3,4,7,8,1<br>12,13,14 1,15,16 | 7 P00762,P00774,P02780,P05539,P0C0A9,P20761,P29315                                                                                                                                                                                                                                                              |
| 5851 | 1,5,6,9,10, 2,3,4,7,8,1<br>12,13,15 1,14,16 | 11 B0BNN3,D4A5U3,P00762,P00774,P02780,P0C0A9,P20761,P35745,Q00715,Q4G075,Q5M8C6                                                                                                                                                                                                                                 |
| 5852 | 1,5,6,9,10, 2,3,4,7,8,1<br>12,13,16 1,14,15 | 4 P00774,Q03191,Q4G075,Q8CIZ5                                                                                                                                                                                                                                                                                   |
| 5853 | 1,5,6,9,10, 2,3,4,7,8,1<br>12,14,15 1,13,16 | 15 B0BNN3,D4A5U3,P00762,P00774,P02780,P02781,P02782,P20761,P22273,P30120,P35745,Q4G075,Q5M8C6,Q62902,Q8CIZ5                                                                                                                                                                                                     |
| 5854 | 1,5,6,9,10, 2,3,4,7,8,1<br>12,14,16 1,13,15 | 2 P00774,Q8CIZ5                                                                                                                                                                                                                                                                                                 |
| 5855 | 1,5,6,9,10, 2,3,4,7,8,1<br>12,15,16 1,13,14 | 6 B0BNN3,D4A5U3,P00774,Q4G075,Q811M5,Q8CIZ5                                                                                                                                                                                                                                                                     |
| 5856 | 1,5,6,9,10, 2,3,4,7,8,1<br>13,14,15 1,12,16 | 10 P00762,P00774,P02780,P05539,P30120,P62804,P70709,Q00715,Q5M8C6,Q5PQL7                                                                                                                                                                                                                                        |
| 5857 | 1,5,6,9,10, 2,3,4,7,8,1<br>13,14,16 1,12,15 | 3 P00774,Q5PQL7,Q8CIZ5                                                                                                                                                                                                                                                                                          |
| 5858 | 1,5,6,9,10, 2,3,4,7,8,1<br>13,15,16 1,12,14 | 5 O70417,P00774,P11883,Q811M5,Q8CIZ5                                                                                                                                                                                                                                                                            |
| 5859 | 1,5,6,9,10, 2,3,4,7,8,1<br>14,15,16 1,12,13 | 6 D4A5U3,P00774,P47967,Q5PQL7,Q811M5,Q8CIZ5                                                                                                                                                                                                                                                                     |
| 5860 | 1,5,6,9,11, 2,3,4,7,8,1<br>12,13,14 0,15,16 | 40 B0LT89,O55004,O70377,O70594,O88339;Q4V882,P00774,P07151,P19468,P20646,P20761,P20762,P20766,P46844,P48508,P51907,P53790,Q03191,Q03248,Q05175,Q3MIE4,Q3ZAV1,Q5I0E9,Q5M7T9,Q5RKI1,Q62761;Q62762;Q62763,Q63270,Q63355,Q63424,Q63598,Q63618,Q64093,Q6AY41,Q6MG61,Q6Q0N1,Q80W57,Q8R431,Q923S2,Q9JJ40,Q9WTW7,Q9Z0W7 |
| 5861 | 1,5,6,9,11, 2,3,4,7,8,1<br>12,13,15 0,14,16 | 15 B0LT89,O70377,O70417,P20761,P20762,P46844,P53790,Q03191,Q62761;Q62762;Q62763,Q63355,Q63424,Q64093,Q923S2,Q9WUW8,Q9WUW9                                                                                                                                                                                       |
| 5862 | 1,5,6,9,11, 2,3,4,7,8,1<br>12,13,16 0,14,15 | 11 O70377,O70417,O88339;Q4V882,P20761,P20762,P54921,Q03191,Q05175,Q5RKI1,Q63355,Q8CIZ5                                                                                                                                                                                                                          |
| 5863 | 1,5,6,9,11, 2,3,4,7,8,1<br>12,14,15 0,13,16 | 28 D4A5U3,O55004,O70257,O70377,O70594,P00762,P00774,P07151,P19468,P20761,P20766,P28570,P46844,P51907,P53790,Q3ZAV1,Q5BJY9,Q62761;Q62762;Q62763,Q63355,Q63424,Q63618,Q64093,Q6Q0N1,Q8CIZ5,Q9JJ40,Q9WTW7,Q9WUW8,Q9Z0W7                                                                                            |
| 5864 | 1,5,6,9,11, 2,3,4,7,8,1<br>12,14,16 0,13,15 | 19 O55004,O70377,O70594,O88339;Q4V882,P00774,P19468,P20761,P20766,P51907,Q03191,Q5I0J9,Q5RKI1,Q63355,Q63424,Q63618,Q64093,Q6Q0N1,Q8CIZ5,Q9WTW7                                                                                                                                                                  |
| 5865 | 1,5,6,9,11, 2,3,4,7,8,1<br>12,15,16 0,13,14 | 8 B0BNN3,D4A5U3,O70417,P20761,P25809,Q03191,Q8CIZ5,Q9WUW8                                                                                                                                                                                                                                                       |
| 5866 | 1,5,6,9,11, 2,3,4,7,8,1<br>13,14,15 0,12,16 | 14 P00774,P02625,P0DMW0;P0DMW1,P20761,P20766,P46844,P53790,Q3ZAV1,Q63424,Q63598,Q64093,Q923V8,Q9JJ40,Q9WTW7                                                                                                                                                                                                     |
| 5867 | 1,5,6,9,11, 2,3,4,7,8,1<br>13,14,16 0,12,15 | 9 P00774,P12368,P20766,P30904,Q5RKI1,Q63598,Q64093,Q8CIZ5,Q9WTW7                                                                                                                                                                                                                                                |

|      |                                             |                                                                                            |
|------|---------------------------------------------|--------------------------------------------------------------------------------------------|
| 5868 | 1,5,6,9,11, 2,3,4,7,8,1<br>13,15,16 0,12,14 | 3 O70417,Q5RLM2,Q8CIZ5                                                                     |
| 5869 | 1,5,6,9,11, 2,3,4,7,8,1<br>14,15,16 0,12,13 | 5 P00774,P20766,Q63618,Q8CIZ5,Q923V8                                                       |
| 5870 | 1,5,6,9,12, 2,3,4,7,8,1<br>13,14,15 0,11,16 | 12 P00762,P00774,P02780,P05539,P20761,P20766,P28570,Q00715,Q5BJY9,Q63424,Q64093,Q9W<br>TW7 |
| 5871 | 1,5,6,9,12, 2,3,4,7,8,1<br>13,14,16 0,11,15 | 5 P00774,P20766,Q5RKI1,Q8CIZ5,Q9WTW7                                                       |
| 5872 | 1,5,6,9,12, 2,3,4,7,8,1<br>13,15,16 0,11,14 | 3 O70417,Q6B345,Q8CIZ5                                                                     |
| 5873 | 1,5,6,9,12, 2,3,4,7,8,1<br>14,15,16 0,11,13 | 5 D4A5U3,P00774,P20766,Q5BJY9,Q8CIZ5                                                       |
| 5874 | 1,5,6,9,13, 2,3,4,7,8,1<br>14,15,16 0,11,12 | 5 P00774,P20766,P70709,Q5PQL7,Q8CIZ5                                                       |
| 5875 | 1,5,6,10,1 2,3,4,7,8,9<br>1,12,13,14 ,15,16 | 4 P00774,P20646,P20761,P35280                                                              |
| 5876 | 1,5,6,10,1 2,3,4,7,8,9<br>1,12,13,15 ,14,16 | 6 D4A5U3,O70417,P00774,P20646,P20761,P23593                                                |
| 5877 | 1,5,6,10,1 2,3,4,7,8,9<br>1,12,13,16 ,14,15 | 4 O70417,P00774,P20646,P35280                                                              |
| 5878 | 1,5,6,10,1 2,3,4,7,8,9<br>1,12,14,15 ,13,16 | 6 D4A5U3,P00762,P00774,P20646,P20761,Q8CIZ5                                                |
| 5879 | 1,5,6,10,1 2,3,4,7,8,9<br>1,12,14,16 ,13,15 | 5 D4A5U3,P00774,P20646,P35280,Q8CIZ5                                                       |
| 5880 | 1,5,6,10,1 2,3,4,7,8,9<br>1,12,15,16 ,13,14 | 6 B0BNN3,D4A5U3,O70417,P00774,Q5QE79,Q8CIZ5                                                |
| 5881 | 1,5,6,10,1 2,3,4,7,8,9<br>1,13,14,15 ,12,16 | 2 D4A5U3,P00774                                                                            |
| 5882 | 1,5,6,10,1 2,3,4,7,8,9<br>1,13,14,16 ,12,15 | 3 P00774,P35280,P36376                                                                     |
| 5883 | 1,5,6,10,1 2,3,4,7,8,9<br>1,13,15,16 ,12,14 | 5 D4A5U3,O70417,P00774,Q5QE79,Q8CIZ5                                                       |
| 5884 | 1,5,6,10,1 2,3,4,7,8,9<br>1,14,15,16 ,12,13 | 3 D4A5U3,P00774,Q8CIZ5                                                                     |
| 5885 | 1,5,6,10,1 2,3,4,7,8,9<br>2,13,14,15 ,11,16 | 9 D4A5U3,P00762,P00774,P02780,P05539,P20646,P20761,P35280,Q62902                           |
| 5886 | 1,5,6,10,1 2,3,4,7,8,9<br>2,13,14,16 ,11,15 | 5 P00774,P14668,P20646,P35280,Q6P6R2                                                       |
| 5887 | 1,5,6,10,1 2,3,4,7,8,9<br>2,13,15,16 ,11,14 | 8 D4A5U3,O70417,P00774,P07150,P35280,Q5QE79,Q63751,Q8CIZ5                                  |

|      |                          |                         |   |                                                         |
|------|--------------------------|-------------------------|---|---------------------------------------------------------|
| 5888 | 1,5,6,10,1<br>2,14,15,16 | 2,3,4,7,8,9<br>,11,13   | 5 | D4A5U3,P00774,P35280,P82471,Q8CIZ5                      |
| 5889 | 1,5,6,10,1<br>3,14,15,16 | 2,3,4,7,8,9<br>,11,12   | 5 | P00774,P35280,P70709,Q5PQL7,Q8CIZ5                      |
| 5890 | 1,5,6,11,1<br>2,13,14,15 | 2,3,4,7,8,9<br>,10,16   | 7 | D4A5U3,P00774,P20646,P20761,P20766,P23739,P70545        |
| 5891 | 1,5,6,11,1<br>2,13,14,16 | 2,3,4,7,8,9<br>,10,15   | 6 | P00774,P20646,P20766,P35280,Q5RKI1,Q9Z0V6               |
| 5892 | 1,5,6,11,1<br>2,13,15,16 | 2,3,4,7,8,9<br>,10,14   | 6 | D4A5U3,O70417,P00774,P20646,Q5QE79,Q8CIZ5               |
| 5893 | 1,5,6,11,1<br>2,14,15,16 | 2,3,4,7,8,9<br>,10,13   | 5 | D4A5U3,P00774,P20766,Q63618,Q8CIZ5                      |
| 5894 | 1,5,6,11,1<br>3,14,15,16 | 2,3,4,7,8,9<br>,10,12   | 5 | O70417,P00774,P20766,Q8CIZ5,Q923V8                      |
| 5895 | 1,5,6,12,1<br>3,14,15,16 | 2,3,4,7,8,9<br>,10,11   | 8 | D4A5U3,P00774,P20646,P20766,P35280,Q6B345,Q6P6R2,Q8CIZ5 |
| 5896 | 1,5,7,8,9,1<br>0,11,12   | 2,3,4,6,13,<br>14,15,16 | 5 | P06760,P29315,P35745,P49134,Q03191                      |
| 5897 | 1,5,7,8,9,1<br>0,11,13   | 2,3,4,6,12,<br>14,15,16 | 2 | P06760,P29315                                           |
| 5898 | 1,5,7,8,9,1<br>0,11,14   | 2,3,4,6,12,<br>13,15,16 | 2 | P06760,P29315                                           |
| 5899 | 1,5,7,8,9,1<br>0,11,15   | 2,3,4,6,12,<br>13,14,16 | 4 | P06760,P35745,P49134,Q6IMF3                             |
| 5900 | 1,5,7,8,9,1<br>0,11,16   | 2,3,4,6,12,<br>13,14,15 | 2 | P49134,Q812E4                                           |
| 5901 | 1,5,7,8,9,1<br>0,12,13   | 2,3,4,6,11,<br>14,15,16 | 3 | P29315,P35745,Q4KLZ6                                    |
| 5902 | 1,5,7,8,9,1<br>0,12,14   | 2,3,4,6,11,<br>13,15,16 | 3 | P21674,P29315,P35745                                    |
| 5903 | 1,5,7,8,9,1<br>0,12,15   | 2,3,4,6,11,<br>13,14,16 | 3 | P19132,P35745,Q4KLZ6                                    |
| 5904 | 1,5,7,8,9,1<br>0,12,16   | 2,3,4,6,11,<br>13,14,15 | 3 | P21674,P35745,P49134                                    |
| 5905 | 1,5,7,8,9,1<br>0,13,14   | 2,3,4,6,11,<br>12,15,16 | 2 | P29315,P35745                                           |
| 5906 | 1,5,7,8,9,1<br>0,13,15   | 2,3,4,6,11,<br>12,14,16 | 2 | P35745,Q4KLZ6                                           |
| 5907 | 1,5,7,8,9,1<br>0,13,16   | 2,3,4,6,11,<br>12,14,15 | 1 | P35745                                                  |

|      |                        |                         |   |                                           |
|------|------------------------|-------------------------|---|-------------------------------------------|
| 5908 | 1,5,7,8,9,1<br>0,14,15 | 2,3,4,6,11,<br>12,13,16 | 2 | P05369,P35745                             |
| 5909 | 1,5,7,8,9,1<br>0,14,16 | 2,3,4,6,11,<br>12,13,15 | 2 | P21674,P35745                             |
| 5910 | 1,5,7,8,9,1<br>0,15,16 | 2,3,4,6,11,<br>12,13,14 | 2 | P35745,P49134                             |
| 5911 | 1,5,7,8,9,1<br>1,12,13 | 2,3,4,6,10,<br>14,15,16 | 3 | P06760,P29315,Q03191                      |
| 5912 | 1,5,7,8,9,1<br>1,12,14 | 2,3,4,6,10,<br>13,15,16 | 5 | P06760,P21674,P29315,Q03191,Q812E4        |
| 5913 | 1,5,7,8,9,1<br>1,12,15 | 2,3,4,6,10,<br>13,14,16 | 3 | P35745,P49134,Q6IMF3                      |
| 5914 | 1,5,7,8,9,1<br>1,12,16 | 2,3,4,6,10,<br>13,14,15 | 6 | P09456,P21674,P49134,Q03191,Q812E4,Q9JHB9 |
| 5915 | 1,5,7,8,9,1<br>1,13,14 | 2,3,4,6,10,<br>12,15,16 | 4 | P06760,P0DMW0,P0DMW1,P29315,Q812E4        |
| 5916 | 1,5,7,8,9,1<br>1,13,15 | 2,3,4,6,10,<br>12,14,16 | 2 | P35745,Q6IMF3                             |
| 5917 | 1,5,7,8,9,1<br>1,13,16 | 2,3,4,6,10,<br>12,14,15 | 4 | P02782,P09456,P30120,Q812E4               |
| 5918 | 1,5,7,8,9,1<br>1,14,15 | 2,3,4,6,10,<br>12,13,16 | 4 | P06760,P35745,Q6IMF3,Q6P6Q2               |
| 5919 | 1,5,7,8,9,1<br>1,14,16 | 2,3,4,6,10,<br>12,13,15 | 3 | P06760,P09456,Q812E4                      |
| 5920 | 1,5,7,8,9,1<br>1,15,16 | 2,3,4,6,10,<br>12,13,14 | 6 | P35745,P49134,Q6IMF3,Q6P6Q2,Q812E4,Q8CJ52 |
| 5921 | 1,5,7,8,9,1<br>2,13,14 | 2,3,4,6,10,<br>11,15,16 | 3 | P17988,P29315,P35745                      |
| 5922 | 1,5,7,8,9,1<br>2,13,15 | 2,3,4,6,10,<br>11,14,16 | 2 | P35745,Q4KLZ6                             |
| 5923 | 1,5,7,8,9,1<br>2,13,16 | 2,3,4,6,10,<br>11,14,15 | 1 | P35745                                    |
| 5924 | 1,5,7,8,9,1<br>2,14,15 | 2,3,4,6,10,<br>11,13,16 | 2 | P00714,P35745                             |
| 5925 | 1,5,7,8,9,1<br>2,14,16 | 2,3,4,6,10,<br>11,13,15 | 2 | P21674,P35745                             |
| 5926 | 1,5,7,8,9,1<br>2,15,16 | 2,3,4,6,10,<br>11,13,14 | 1 | P35745                                    |
| 5927 | 1,5,7,8,9,1<br>3,14,15 | 2,3,4,6,10,<br>11,12,16 | 1 | P35745                                    |

|      |                         |                         |                               |
|------|-------------------------|-------------------------|-------------------------------|
| 5928 | 1,5,7,8,9,1<br>3,14,16  | 2,3,4,6,10,<br>11,12,15 | 0                             |
| 5929 | 1,5,7,8,9,1<br>3,15,16  | 2,3,4,6,10,<br>11,12,14 | 1 P35745                      |
| 5930 | 1,5,7,8,9,1<br>4,15,16  | 2,3,4,6,10,<br>11,12,13 | 1 P35745                      |
| 5931 | 1,5,7,8,10,<br>11,12,13 | 2,3,4,6,9,1<br>4,15,16  | 4 P23593,P29315,P47967,Q5I0D1 |
| 5932 | 1,5,7,8,10,<br>11,12,14 | 2,3,4,6,9,1<br>3,15,16  | 2 P23593,P29315               |
| 5933 | 1,5,7,8,10,<br>11,12,15 | 2,3,4,6,9,1<br>3,14,16  | 4 P23593,P35745,Q6IMF3,Q6P6Q2 |
| 5934 | 1,5,7,8,10,<br>11,12,16 | 2,3,4,6,9,1<br>3,14,15  | 3 P08010,P30120,Q9JHB9        |
| 5935 | 1,5,7,8,10,<br>11,13,14 | 2,3,4,6,9,1<br>2,15,16  | 1 P29315                      |
| 5936 | 1,5,7,8,10,<br>11,13,15 | 2,3,4,6,9,1<br>2,14,16  | 2 Q6IMF3,Q6P6Q2               |
| 5937 | 1,5,7,8,10,<br>11,13,16 | 2,3,4,6,9,1<br>2,14,15  | 3 P02782,P09456,P30120        |
| 5938 | 1,5,7,8,10,<br>11,14,15 | 2,3,4,6,9,1<br>2,13,16  | 2 Q6IMF3,Q6P6Q2               |
| 5939 | 1,5,7,8,10,<br>11,14,16 | 2,3,4,6,9,1<br>2,13,15  | 0                             |
| 5940 | 1,5,7,8,10,<br>11,15,16 | 2,3,4,6,9,1<br>2,13,14  | 4 P49134,Q4FZU2,Q6IMF3,Q6P6Q2 |
| 5941 | 1,5,7,8,10,<br>12,13,14 | 2,3,4,6,9,1<br>1,15,16  | 1 P29315                      |
| 5942 | 1,5,7,8,10,<br>12,13,15 | 2,3,4,6,9,1<br>1,14,16  | 2 P35745,Q4KLZ6               |
| 5943 | 1,5,7,8,10,<br>12,13,16 | 2,3,4,6,9,1<br>1,14,15  | 0                             |
| 5944 | 1,5,7,8,10,<br>12,14,15 | 2,3,4,6,9,1<br>1,13,16  | 2 D3ZUC6,P35745               |
| 5945 | 1,5,7,8,10,<br>12,14,16 | 2,3,4,6,9,1<br>1,13,15  | 1 P21674                      |
| 5946 | 1,5,7,8,10,<br>12,15,16 | 2,3,4,6,9,1<br>1,13,14  | 1 P35745                      |
| 5947 | 1,5,7,8,10,<br>13,14,15 | 2,3,4,6,9,1<br>1,12,16  | 1 P35745                      |

|      |                                             |                                                           |
|------|---------------------------------------------|-----------------------------------------------------------|
| 5948 | 1,5,7,8,10, 2,3,4,6,9,1<br>13,14,16 1,12,15 | 2 O35077,Q99MH3                                           |
| 5949 | 1,5,7,8,10, 2,3,4,6,9,1<br>13,15,16 1,12,14 | 2 O35077,P35745                                           |
| 5950 | 1,5,7,8,10, 2,3,4,6,9,1<br>14,15,16 1,12,13 | 2 O35077,P35745                                           |
| 5951 | 1,5,7,8,11, 2,3,4,6,9,1<br>12,13,14 0,15,16 | 5 D3ZUC6,P19218,P29315,Q811M5,Q8K1G0                      |
| 5952 | 1,5,7,8,11, 2,3,4,6,9,1<br>12,13,15 0,14,16 | 2 Q6IMF3,Q6P6Q2                                           |
| 5953 | 1,5,7,8,11, 2,3,4,6,9,1<br>12,13,16 0,14,15 | 6 P02782,P09456,P30120,P47967,Q811M5,Q9JHB9               |
| 5954 | 1,5,7,8,11, 2,3,4,6,9,1<br>12,14,15 0,13,16 | 4 D3ZUC6,Q6IMF3,Q6P6Q2,Q811M5                             |
| 5955 | 1,5,7,8,11, 2,3,4,6,9,1<br>12,14,16 0,13,15 | 6 P02782,P21674,P30120,Q811M5,Q812E4,Q9JHB9               |
| 5956 | 1,5,7,8,11, 2,3,4,6,9,1<br>12,15,16 0,13,14 | 5 Q06000,Q4FZU2,Q6IMF3,Q6P6Q2,Q9JHB9                      |
| 5957 | 1,5,7,8,11, 2,3,4,6,9,1<br>13,14,15 0,12,16 | 4 D3ZUC6,Q6IMF3,Q6P6Q2,Q811M5                             |
| 5958 | 1,5,7,8,11, 2,3,4,6,9,1<br>13,14,16 0,12,15 | 5 P02782,P09456,P30120,Q811M5,Q99MH3                      |
| 5959 | 1,5,7,8,11, 2,3,4,6,9,1<br>13,15,16 0,12,14 | 7 P01041,P02782,P09456,P30120,Q4FZU2,Q6IMF3,Q6P6Q2        |
| 5960 | 1,5,7,8,11, 2,3,4,6,9,1<br>14,15,16 0,12,13 | 4 Q4FZU2,Q6IMF3,Q6P6Q2,Q8CJ52                             |
| 5961 | 1,5,7,8,12, 2,3,4,6,9,1<br>13,14,15 0,11,16 | 3 D3ZUC6,P35745,Q9Z2L0                                    |
| 5962 | 1,5,7,8,12, 2,3,4,6,9,1<br>13,14,16 0,11,15 | 3 Q811M5,Q99MH3,Q9Z2L0                                    |
| 5963 | 1,5,7,8,12, 2,3,4,6,9,1<br>13,15,16 0,11,14 | 1 P35745                                                  |
| 5964 | 1,5,7,8,12, 2,3,4,6,9,1<br>14,15,16 0,11,13 | 1 P35745                                                  |
| 5965 | 1,5,7,8,13, 2,3,4,6,9,1<br>14,15,16 0,11,12 | 1 Q62714                                                  |
| 5966 | 1,5,7,9,10, 2,3,4,6,8,1<br>11,12,13 4,15,16 | 6 B0LT89,P00762,P20761,P20762,Q03191,Q62761;Q62762;Q62763 |
| 5967 | 1,5,7,9,10, 2,3,4,6,8,1<br>11,12,14 3,15,16 | 6 P00762,P00774,P07151,P20761,Q03191,Q62761;Q62762;Q62763 |



|      |                                             |                                                                                                                                                                                    |
|------|---------------------------------------------|------------------------------------------------------------------------------------------------------------------------------------------------------------------------------------|
| 5968 | 1,5,7,9,10, 2,3,4,6,8,1<br>11,12,15 3,14,16 | 5 P00762,P20761,P35745,Q03191,Q62761;Q62762;Q62763                                                                                                                                 |
| 5969 | 1,5,7,9,10, 2,3,4,6,8,1<br>11,12,16 3,14,15 | 2 Q03191,Q8CIZ5                                                                                                                                                                    |
| 5970 | 1,5,7,9,10, 2,3,4,6,8,1<br>11,13,14 2,15,16 | 2 P00762,P00774                                                                                                                                                                    |
| 5971 | 1,5,7,9,10, 2,3,4,6,8,1<br>11,13,15 2,14,16 | 2 O70417,P00762                                                                                                                                                                    |
| 5972 | 1,5,7,9,10, 2,3,4,6,8,1<br>11,13,16 2,14,15 | 0                                                                                                                                                                                  |
| 5973 | 1,5,7,9,10, 2,3,4,6,8,1<br>11,14,15 2,13,16 | 3 P00762,P00774,P02625                                                                                                                                                             |
| 5974 | 1,5,7,9,10, 2,3,4,6,8,1<br>11,14,16 2,13,15 | 3 P00774,Q8CIZ5,Q9R168                                                                                                                                                             |
| 5975 | 1,5,7,9,10, 2,3,4,6,8,1<br>11,15,16 2,13,14 | 1 Q8CIZ5                                                                                                                                                                           |
| 5976 | 1,5,7,9,10, 2,3,4,6,8,1<br>12,13,14 1,15,16 | 5 P00762,P00774,P29315,P50280,Q03191                                                                                                                                               |
| 5977 | 1,5,7,9,10, 2,3,4,6,8,1<br>12,13,15 1,14,16 | 4 P00762,P35745,P50280,Q4KLZ6                                                                                                                                                      |
| 5978 | 1,5,7,9,10, 2,3,4,6,8,1<br>12,13,16 1,14,15 | 2 P50280,Q03191                                                                                                                                                                    |
| 5979 | 1,5,7,9,10, 2,3,4,6,8,1<br>12,14,15 1,13,16 | 6 P00714,P00762,P00774,P30120,P35745,Q62902                                                                                                                                        |
| 5980 | 1,5,7,9,10, 2,3,4,6,8,1<br>12,14,16 1,13,15 | 4 P00774,P21674,Q03191,Q8CIZ5                                                                                                                                                      |
| 5981 | 1,5,7,9,10, 2,3,4,6,8,1<br>12,15,16 1,13,14 | 3 P00774,P35745,Q8CIZ5                                                                                                                                                             |
| 5982 | 1,5,7,9,10, 2,3,4,6,8,1<br>13,14,15 1,12,16 | 7 P00762,P00774,P02625,P12020,P35745,P50280,Q00715                                                                                                                                 |
| 5983 | 1,5,7,9,10, 2,3,4,6,8,1<br>13,14,16 1,12,15 | 1 P00774                                                                                                                                                                           |
| 5984 | 1,5,7,9,10, 2,3,4,6,8,1<br>13,15,16 1,12,14 | 3 O70417,P00774,P12020                                                                                                                                                             |
| 5985 | 1,5,7,9,10, 2,3,4,6,8,1<br>14,15,16 1,12,13 | 3 P00774,P12020,Q8CIZ5                                                                                                                                                             |
| 5986 | 1,5,7,9,11, 2,3,4,6,8,1<br>12,13,14 0,15,16 | O55004,O70377,O70594,O88339;Q4V882,P07151,P19468,P20761,P20762,P46844,P53790,Q03<br>21 191,Q05175,Q5M7T9,Q62761;Q62762;Q62763,Q63270,Q63424,Q63598,Q63618,Q6Q0N1,Q9<br>WTW7,Q9Z0W7 |
| 5987 | 1,5,7,9,11, 2,3,4,6,8,1<br>12,13,15 0,14,16 | 7 O55004,O70417,P07151,P20761,P20762,Q03191,Q62761;Q62762;Q62763                                                                                                                   |

|      |                                             |                                                                                                                        |
|------|---------------------------------------------|------------------------------------------------------------------------------------------------------------------------|
| 5988 | 1,5,7,9,11, 2,3,4,6,8,1<br>12,13,16 0,14,15 | 4 O88339;Q4V882,P20762,P54921,Q03191                                                                                   |
| 5989 | 1,5,7,9,11, 2,3,4,6,8,1<br>12,14,15 0,13,16 | 14 O55004,O70257,P00774,P02625,P02631,P07151,P20761,P28570,P46844,Q03191,Q5BJY9,Q627<br>61;Q62762;Q62763,Q63424,Q63618 |
| 5990 | 1,5,7,9,11, 2,3,4,6,8,1<br>12,14,16 0,13,15 | 7 O55004,O88339;Q4V882,P21674,Q03191,Q498D9,Q63618,Q8CIZ5                                                              |
| 5991 | 1,5,7,9,11, 2,3,4,6,8,1<br>12,15,16 0,13,14 | 4 O55004,P02631,Q03191,Q8CIZ5                                                                                          |
| 5992 | 1,5,7,9,11, 2,3,4,6,8,1<br>13,14,15 0,12,16 | 7 O55004,P00774,P02625,P02631,P07151,P0DMW0;P0DMW1,P46844                                                              |
| 5993 | 1,5,7,9,11, 2,3,4,6,8,1<br>13,14,16 0,12,15 | 3 P0DMW0;P0DMW1,Q498D9,Q9R168                                                                                          |
| 5994 | 1,5,7,9,11, 2,3,4,6,8,1<br>13,15,16 0,12,14 | 1 O70417                                                                                                               |
| 5995 | 1,5,7,9,11, 2,3,4,6,8,1<br>14,15,16 0,12,13 | 4 O55004,P00774,P02631,Q8CIZ5                                                                                          |
| 5996 | 1,5,7,9,12, 2,3,4,6,8,1<br>13,14,15 0,11,16 | 8 O55004,P00762,P00774,P07151,P28570,P35745,P50280,Q5BJY9                                                              |
| 5997 | 1,5,7,9,12, 2,3,4,6,8,1<br>13,14,16 0,11,15 | 2 P00774,P50280                                                                                                        |
| 5998 | 1,5,7,9,12, 2,3,4,6,8,1<br>13,15,16 0,11,14 | 1 O70417                                                                                                               |
| 5999 | 1,5,7,9,12, 2,3,4,6,8,1<br>14,15,16 0,11,13 | 4 P00774,P02631,Q5BJY9,Q8CIZ5                                                                                          |
| 6000 | 1,5,7,9,13, 2,3,4,6,8,1<br>14,15,16 0,11,12 | 1 P00774                                                                                                               |
| 6001 | 1,5,7,10,1 2,3,4,6,8,9<br>1,12,13,14 ,15,16 | 3 P00774,P23593,P29315                                                                                                 |
| 6002 | 1,5,7,10,1 2,3,4,6,8,9<br>1,12,13,15 ,14,16 | 3 O70417,P00774,P23593                                                                                                 |
| 6003 | 1,5,7,10,1 2,3,4,6,8,9<br>1,12,13,16 ,14,15 | 5 P00774,P23593,P36376,P47967,P97840                                                                                   |
| 6004 | 1,5,7,10,1 2,3,4,6,8,9<br>1,12,14,15 ,13,16 | 2 P00774,P23593                                                                                                        |
| 6005 | 1,5,7,10,1 2,3,4,6,8,9<br>1,12,14,16 ,13,15 | 2 P00774,P36376                                                                                                        |
| 6006 | 1,5,7,10,1 2,3,4,6,8,9<br>1,12,15,16 ,13,14 | 2 P00774,Q8CIZ5                                                                                                        |
| 6007 | 1,5,7,10,1 2,3,4,6,8,9<br>1,13,14,15 ,12,16 | 1 P00774                                                                                                               |

|      |                                             |                                             |
|------|---------------------------------------------|---------------------------------------------|
| 6008 | 1,5,7,10,1 2,3,4,6,8,9<br>1,13,14,16 ,12,15 | 3 P00774,P36376,Q99MH3                      |
| 6009 | 1,5,7,10,1 2,3,4,6,8,9<br>1,13,15,16 ,12,14 | 2 O70417,P00774                             |
| 6010 | 1,5,7,10,1 2,3,4,6,8,9<br>1,14,15,16 ,12,13 | 2 P00774,Q8CIZ5                             |
| 6011 | 1,5,7,10,1 2,3,4,6,8,9<br>2,13,14,15 ,11,16 | 3 P00774,P50280,Q6P6S4                      |
| 6012 | 1,5,7,10,1 2,3,4,6,8,9<br>2,13,14,16 ,11,15 | 4 P00774,P36376,Q6P6S4,Q99MH3               |
| 6013 | 1,5,7,10,1 2,3,4,6,8,9<br>2,13,15,16 ,11,14 | 2 O70417,P00774                             |
| 6014 | 1,5,7,10,1 2,3,4,6,8,9<br>2,14,15,16 ,11,13 | 2 P00774,Q6P6S4                             |
| 6015 | 1,5,7,10,1 2,3,4,6,8,9<br>3,14,15,16 ,11,12 | 2 P00774,Q6P6S4                             |
| 6016 | 1,5,7,11,1 2,3,4,6,8,9<br>2,13,14,15 ,10,16 | 6 O55004,P00774,P07151,P17559,P23739,Q811M5 |
| 6017 | 1,5,7,11,1 2,3,4,6,8,9<br>2,13,14,16 ,10,15 | 5 P00774,P17559,P36376,Q811M5,Q99MH3        |
| 6018 | 1,5,7,11,1 2,3,4,6,8,9<br>2,13,15,16 ,10,14 | 2 O70417,P17559                             |
| 6019 | 1,5,7,11,1 2,3,4,6,8,9<br>2,14,15,16 ,10,13 | 4 O55004,P00774,P02631,P17559               |
| 6020 | 1,5,7,11,1 2,3,4,6,8,9<br>3,14,15,16 ,10,12 | 3 O70417,P00774,P17559                      |
| 6021 | 1,5,7,12,1 2,3,4,6,8,9<br>3,14,15,16 ,10,11 | 3 P00774,P17559,Q6P6S4                      |
| 6022 | 1,5,8,9,10, 2,3,4,6,7,1<br>11,12,13 4,15,16 | 3 B0LT89,P17988,Q03191                      |
| 6023 | 1,5,8,9,10, 2,3,4,6,7,1<br>11,12,14 3,15,16 | 1 Q03191                                    |
| 6024 | 1,5,8,9,10, 2,3,4,6,7,1<br>11,12,15 3,14,16 | 1 P35745                                    |
| 6025 | 1,5,8,9,10, 2,3,4,6,7,1<br>11,12,16 3,14,15 | 4 O88797,P49134,P80299,Q03191               |
| 6026 | 1,5,8,9,10, 2,3,4,6,7,1<br>11,13,14 2,15,16 | 2 B0LT89,P17988                             |
| 6027 | 1,5,8,9,10, 2,3,4,6,7,1<br>11,13,15 2,14,16 | 3 B0LT89,P07943,Q80WL1                      |

|      |                                             |                                                                                                                                                                                                                |
|------|---------------------------------------------|----------------------------------------------------------------------------------------------------------------------------------------------------------------------------------------------------------------|
| 6028 | 1,5,8,9,10, 2,3,4,6,7,1<br>11,13,16 2,14,15 | 2 BOLT89,Q80WL1                                                                                                                                                                                                |
| 6029 | 1,5,8,9,10, 2,3,4,6,7,1<br>11,14,15 2,13,16 | 2 P07943,P80299                                                                                                                                                                                                |
| 6030 | 1,5,8,9,10, 2,3,4,6,7,1<br>11,14,16 2,13,15 | 1 P80299                                                                                                                                                                                                       |
| 6031 | 1,5,8,9,10, 2,3,4,6,7,1<br>11,15,16 2,13,14 | 3 P07943,P49134,P80299                                                                                                                                                                                         |
| 6032 | 1,5,8,9,10, 2,3,4,6,7,1<br>12,13,14 1,15,16 | 2 P17988,P29315                                                                                                                                                                                                |
| 6033 | 1,5,8,9,10, 2,3,4,6,7,1<br>12,13,15 1,14,16 | 3 P11598,P35745,Q4KLZ6                                                                                                                                                                                         |
| 6034 | 1,5,8,9,10, 2,3,4,6,7,1<br>12,13,16 1,14,15 | 0                                                                                                                                                                                                              |
| 6035 | 1,5,8,9,10, 2,3,4,6,7,1<br>12,14,15 1,13,16 | 5 P00714,P05369,P07647,P11598,P35745                                                                                                                                                                           |
| 6036 | 1,5,8,9,10, 2,3,4,6,7,1<br>12,14,16 1,13,15 | 1 P21674                                                                                                                                                                                                       |
| 6037 | 1,5,8,9,10, 2,3,4,6,7,1<br>12,15,16 1,13,14 | 1 P35745                                                                                                                                                                                                       |
| 6038 | 1,5,8,9,10, 2,3,4,6,7,1<br>13,14,15 1,12,16 | 4 P07647,P11598,P35745,Q00715                                                                                                                                                                                  |
| 6039 | 1,5,8,9,10, 2,3,4,6,7,1<br>13,14,16 1,12,15 | 0                                                                                                                                                                                                              |
| 6040 | 1,5,8,9,10, 2,3,4,6,7,1<br>13,15,16 1,12,14 | 2 P35745,Q80WL1                                                                                                                                                                                                |
| 6041 | 1,5,8,9,10, 2,3,4,6,7,1<br>14,15,16 1,12,13 | 3 P35745,P47967,P80299                                                                                                                                                                                         |
| 6042 | 1,5,8,9,11, 2,3,4,6,7,1<br>12,13,14 0,15,16 | BOLT89,O70377,O70594,P17988,P18297,P19468,P20766,P29975,P46844,P48508,P51907,P5379<br>28 0,P57113,Q03248,Q5I0E9,Q5M7T9,Q63270,Q63424,Q63598,Q63618,Q64093,Q6Q0N1,Q71MB<br>6,Q80W57,Q923M1,Q9JJ40,Q9WTW7,Q9Z0W7 |
| 6043 | 1,5,8,9,11, 2,3,4,6,7,1<br>12,13,15 0,14,16 | 7 BOLT89,P18297,P48037,P57113,Q71MB6,Q80WL1,Q923S2                                                                                                                                                             |
| 6044 | 1,5,8,9,11, 2,3,4,6,7,1<br>12,13,16 0,14,15 | 6 BOLT89,P18297,P54921,Q03191,Q5RKI1,Q80WL1                                                                                                                                                                    |
| 6045 | 1,5,8,9,11, 2,3,4,6,7,1<br>12,14,15 0,13,16 | 9 O70594,P18297,P19468,P20766,P28570,P46844,P80299,Q63424,Q63618                                                                                                                                               |
| 6046 | 1,5,8,9,11, 2,3,4,6,7,1<br>12,14,16 0,13,15 | 12 O70594,O883339;Q4V882,O88797,P18297,P19468,P20766,P21674,P51907,P80299,Q5RKI1,Q636<br>18,Q923M1                                                                                                             |
| 6047 | 1,5,8,9,11, 2,3,4,6,7,1<br>12,15,16 0,13,14 | 4 O88797,P80299,Q5QE79,Q80WL1                                                                                                                                                                                  |

|      |                                             |                                                                                     |
|------|---------------------------------------------|-------------------------------------------------------------------------------------|
| 6048 | 1,5,8,9,11, 2,3,4,6,7,1<br>13,14,15 0,12,16 | 10 BOLT89,P0DMW0;P0DMW1,P18297,P20766,P46844,Q03248,Q71MB6,Q80WL1,Q9JJ40,Q9WTW<br>7 |
| 6049 | 1,5,8,9,11, 2,3,4,6,7,1<br>13,14,16 0,12,15 | 5 P18297,P20766,P80299,Q5RKI1,Q63598                                                |
| 6050 | 1,5,8,9,11, 2,3,4,6,7,1<br>13,15,16 0,12,14 | 3 P80299,Q5RLM2,Q80WL1                                                              |
| 6051 | 1,5,8,9,11, 2,3,4,6,7,1<br>14,15,16 0,12,13 | 2 P20766,P80299                                                                     |
| 6052 | 1,5,8,9,12, 2,3,4,6,7,1<br>13,14,15 0,11,16 | 5 P11598,P20766,P28570,P35745,Q9WTW7                                                |
| 6053 | 1,5,8,9,12, 2,3,4,6,7,1<br>13,14,16 0,11,15 | 3 P17988,P20766,Q5RKI1                                                              |
| 6054 | 1,5,8,9,12, 2,3,4,6,7,1<br>13,15,16 0,11,14 | 2 P35745,Q80WL1                                                                     |
| 6055 | 1,5,8,9,12, 2,3,4,6,7,1<br>14,15,16 0,11,13 | 3 P20766,P35745,P80299                                                              |
| 6056 | 1,5,8,9,13, 2,3,4,6,7,1<br>14,15,16 0,11,12 | 2 P20766,Q80WL1                                                                     |
| 6057 | 1,5,8,10,1 2,3,4,6,7,9<br>1,12,13,14 ,15,16 | 1 P23739                                                                            |
| 6058 | 1,5,8,10,1 2,3,4,6,7,9<br>1,12,13,15 ,14,16 | 2 Q5QE79,Q80WL1                                                                     |
| 6059 | 1,5,8,10,1 2,3,4,6,7,9<br>1,12,13,16 ,14,15 | 2 Q5QE79,Q80WL1                                                                     |
| 6060 | 1,5,8,10,1 2,3,4,6,7,9<br>1,12,14,15 ,13,16 | 1 P80299                                                                            |
| 6061 | 1,5,8,10,1 2,3,4,6,7,9<br>1,12,14,16 ,13,15 | 1 P80299                                                                            |
| 6062 | 1,5,8,10,1 2,3,4,6,7,9<br>1,12,15,16 ,13,14 | 2 P80299,Q5QE79                                                                     |
| 6063 | 1,5,8,10,1 2,3,4,6,7,9<br>1,13,14,15 ,12,16 | 1 P23739                                                                            |
| 6064 | 1,5,8,10,1 2,3,4,6,7,9<br>1,13,14,16 ,12,15 | 0                                                                                   |
| 6065 | 1,5,8,10,1 2,3,4,6,7,9<br>1,13,15,16 ,12,14 | 2 Q5QE79,Q80WL1                                                                     |
| 6066 | 1,5,8,10,1 2,3,4,6,7,9<br>1,14,15,16 ,12,13 | 2 P80299,Q6IMF3                                                                     |
| 6067 | 1,5,8,10,1 2,3,4,6,7,9<br>2,13,14,15 ,11,16 | 2 P22006,P23739                                                                     |

|      |                                 |    |                                                                                                                                                                                                                                                             |
|------|---------------------------------|----|-------------------------------------------------------------------------------------------------------------------------------------------------------------------------------------------------------------------------------------------------------------|
| 6068 | 1,5,8,10,1<br>2,13,14,16 ,11,15 | 1  | P35280                                                                                                                                                                                                                                                      |
| 6069 | 1,5,8,10,1<br>2,13,15,16 ,11,14 | 2  | Q5QE79,Q80WL1                                                                                                                                                                                                                                               |
| 6070 | 1,5,8,10,1<br>2,14,15,16 ,11,13 | 3  | P00774,P80299,Q63617                                                                                                                                                                                                                                        |
| 6071 | 1,5,8,10,1<br>3,14,15,16 ,11,12 | 3  | O35077,P00774,P70709                                                                                                                                                                                                                                        |
| 6072 | 1,5,8,11,1<br>2,13,14,15 ,10,16 | 6  | P18297,P20766,P23739,Q811M5,Q8K1G0,Q9WVH8                                                                                                                                                                                                                   |
| 6073 | 1,5,8,11,1<br>2,13,14,16 ,10,15 | 5  | P20766,P23739,Q5RKI1,Q811M5,Q8K1G0                                                                                                                                                                                                                          |
| 6074 | 1,5,8,11,1<br>2,13,15,16 ,10,14 | 4  | P23739,Q5QE79,Q80WL1,Q8K1G0                                                                                                                                                                                                                                 |
| 6075 | 1,5,8,11,1<br>2,14,15,16 ,10,13 | 3  | P20766,P80299,Q9WVH8                                                                                                                                                                                                                                        |
| 6076 | 1,5,8,11,1<br>3,14,15,16 ,10,12 | 4  | P20766,P23739,P80299,Q80WL1                                                                                                                                                                                                                                 |
| 6077 | 1,5,8,12,1<br>3,14,15,16 ,10,11 | 2  | P20766,P23739                                                                                                                                                                                                                                               |
| 6078 | 1,5,9,10,1<br>1,12,13,14 ,15,16 | 34 | B0LT89,D4A5U3,O55004,O70377,O70594,P00774,P07151,P17988,P19468,P20761,P20762,P46844,P48508,P50115,P50280,P53790,P98089,Q03191,Q03248,Q05175,Q3ZAV1,Q5I0E9,Q5M7T9,Q62761;Q62762;Q62763,Q63270,Q63424,Q63598,Q6Q0N1,Q6TMA8,Q8CIZ5,Q923S2,Q9R1T5,Q9WTW7,Q9Z0W7 |
| 6079 | 1,5,9,10,1<br>1,12,13,15 ,14,16 | 20 | B0LT89,D3ZHA0,D4A5U3,O55004,O70417,P07151,P20761,P20762,P46844,P50115,P50280,P98089,Q03191,Q5QE79,Q62635,Q62761;Q62762;Q62763,Q6TMA8,Q8CIZ5,Q923S2,Q9WUW8                                                                                                   |
| 6080 | 1,5,9,10,1<br>1,12,13,16 ,14,15 | 14 | B0LT89,D4A5U3,O70417,P20761,P20762,P50115,P50280,P54921,P98089,Q03191,Q5QE79,Q62635,Q6TMA8,Q8CIZ5                                                                                                                                                           |
| 6081 | 1,5,9,10,1<br>1,12,14,15 ,13,16 | 27 | D4A5U3,O55004,O70257,O70594,P00762,P00774,P02631,P06761,P07151,P19468,P20761,P28570,P46844,P50115,P55091,P98089,Q03191,Q3ZAV1,Q5M7T9,Q62761;Q62762;Q62763,Q62902,Q63424,Q63618,Q6Q0N1,Q6TMA8,Q8CIZ5,Q9WUW8                                                  |
| 6082 | 1,5,9,10,1<br>1,12,14,16 ,13,15 | 15 | D4A5U3,O55004,O70257,O70594,P00774,P02631,P20761,P50115,P55091,P98089,Q03191,Q63618,Q6Q0N1,Q6TMA8,Q8CIZ5                                                                                                                                                    |
| 6083 | 1,5,9,10,1<br>1,12,15,16 ,13,14 | 19 | B0BNN3,D3ZHA0,D4A5U3,O55004,O70417,P00774,P02631,P20761,P25809,P50115,P55091,P63081,P98089,Q03191,Q5QE79,Q62635,Q6TMA8,Q8CIZ5,Q9WUW8                                                                                                                        |
| 6084 | 1,5,9,10,1<br>1,13,14,15 ,12,16 | 18 | B0LT89,D4A5U3,O55004,O70417,P00774,P02631,P06761,P07151,P20761,P20762,P46844,P50115,P98089,Q5M7T9,Q6TMA8,Q8CIZ5,Q9R0T3,Q9WTW7                                                                                                                               |
| 6085 | 1,5,9,10,1<br>1,13,14,16 ,12,15 | 8  | B0LT89,P00774,P20761,P30904,P50115,P98089,Q63598,Q8CIZ5                                                                                                                                                                                                     |
| 6086 | 1,5,9,10,1<br>1,13,15,16 ,12,14 | 13 | B0LT89,D4A5U3,O70417,P00774,P02631,P20761,P50115,P98089,Q5QE79,Q5RLM2,Q62635,Q63751,Q8CIZ5                                                                                                                                                                  |

|      |                                             |    |                                                                                                                                                                                                                                                                                                                                                                                                                                                                                                                                                     |
|------|---------------------------------------------|----|-----------------------------------------------------------------------------------------------------------------------------------------------------------------------------------------------------------------------------------------------------------------------------------------------------------------------------------------------------------------------------------------------------------------------------------------------------------------------------------------------------------------------------------------------------|
| 6087 | 1,5,9,10,1 2,3,4,6,7,8<br>1,14,15,16 ,12,13 | 11 | D4A5U3,O55004,P00774,P02631,P20761,P50115,P55091,P80299,P98089,Q5QE79,Q8CIZ5                                                                                                                                                                                                                                                                                                                                                                                                                                                                        |
| 6088 | 1,5,9,10,1 2,3,4,6,7,8<br>2,13,14,15 ,11,16 | 39 | D4A5U3,O55004,P00762,P00774,P02780,P02781,P02782,P06761,P07150,P07151,P07647,P08723,P09456,P0C0A9,P11598,P12020,P20761,P22273,P22282,P22283,P28570,P30120,P46462,P50115,P50280,P55091,P98089,Q00715,Q4G063,Q4G075,Q5M8C6,Q5U1Y4,Q62902,Q63617,Q6TMA8,Q8CIZ5,Q99041,Q9JHB9,Q9R0T3                                                                                                                                                                                                                                                                    |
| 6089 | 1,5,9,10,1 2,3,4,6,7,8<br>2,13,14,16 ,11,15 | 18 | D4A5U3,P00774,P02780,P06761,P07150,P11598,P20761,P22273,P22282,P50115,P50280,P55091,P98089,Q4G063,Q4G075,Q5M8C6,Q63617,Q8CIZ5                                                                                                                                                                                                                                                                                                                                                                                                                       |
| 6090 | 1,5,9,10,1 2,3,4,6,7,8<br>2,13,15,16 ,11,14 | 29 | D4A5U3,O70417,P00774,P02780,P06761,P06911,P07150,P08937,P0C0A9,P11598,P12020,P20761,P22273,P22282,P46462,P50115,P50280,P55091,P98089,Q4G075,Q5GRG2,Q5M8C6,Q5QE79,Q62635,Q63617,Q63751,Q8CIZ5,Q99041,Q9R0T3                                                                                                                                                                                                                                                                                                                                          |
| 6091 | 1,5,9,10,1 2,3,4,6,7,8<br>2,14,15,16 ,11,13 | 27 | D4A5U3,O55004,P00774,P02631,P02780,P06761,P11598,P12020,P20761,P22273,P22282,P22283,P46462,P50115,P50280,P55091,P98089,Q4G075,Q5M8C6,Q5QE79,Q62635,Q62902,Q63617,Q8CIZ5,Q99041,Q9JI85,Q9R0T3                                                                                                                                                                                                                                                                                                                                                        |
| 6092 | 1,5,9,10,1 2,3,4,6,7,8<br>3,14,15,16 ,11,12 | 29 | D4A5U3,O70417,P00774,P02631,P02780,P06761,P06911,P07150,P11598,P12020,P20761,P22273,P22282,P22283,P31430,P46462,P50115,P50280,P55091,P70709,P98089,Q00715,Q4G075,Q5GRG2,Q5M8C6,Q62635,Q63617,Q8CIZ5,Q9R0T3                                                                                                                                                                                                                                                                                                                                          |
| 6093 | 1,5,9,11,1 2,3,4,6,7,8<br>2,13,14,15 ,10,16 | 72 | B0LT89,D4A5U3,O35763,O55004,O70257,O70377,O70417,O70594,O88339;Q4V882,P00774,P01836,P02631,P07151,P18427,P18757,P19468,P20761,P20762,P20766,P23739,P28570,P29975,P36970,P38918,P46720,P46844,P48508,P50115,P50280,P51907,P53790,P55091,P57113,P68035;P68136,P98089,Q03248,Q05175,Q3MIE4,Q3T1J9,Q3ZAV1,Q5BJY9,Q5I0E9,Q5M7T9,Q62687,Q62761,Q62762,Q62763,Q63270,Q63355,Q63424,Q63598,Q63618,Q64093,Q64602,Q68FT5,Q6AY41,Q6MG61,Q6Q0N1,Q6TMA8,Q71MB6,Q80W57,Q8CIZ5,Q8R431,Q923S2,Q9JJ19,Q9JJ40,Q9JLJ3,Q9QYU4,Q9R0T3,Q9R1T5,Q9WTW7,Q9WUW8,Q9WUW9,Q9Z0W7 |
| 6094 | 1,5,9,11,1 2,3,4,6,7,8<br>2,13,14,16 ,10,15 | 55 | B0LT89,O35763,O55004,O70257,O70377,O70417,O70594,O88339;Q4V882,P00774,P02631,P18757,P19468,P20761,P20762,P20766,P29975,P30904,P38918,P46844,P48508,P50115,P51907,P53790,P54921,P55091,P57113,P68035;P68136,P98089,Q03191,Q03248,Q05175,Q3MIE4,Q3T1J9,Q3ZAV1,Q498D9,Q5I0E9,Q5M7T9,Q5RKI1,Q63270,Q63355,Q63424,Q63598,Q63618,Q64093,Q6MG61,Q6Q0N1,Q80W57,Q8CIZ5,Q8R431,Q923S2,Q9JJ19,Q9JJ40,Q9JLJ3,Q9R1T5,Q9WTW7,Q9Z0W7                                                                                                                               |
| 6095 | 1,5,9,11,1 2,3,4,6,7,8<br>2,13,15,16 ,10,14 | 37 | B0LT89,D4A5U3,O55004,O70257,O70377,O70417,O70594,O88339;Q4V882,P02631,P08937,P20761,P20762,P20766,P46844,P48508,P50115,P53790,P54921,P55091,P57113,P98089,Q03191,Q05175,Q5I0E9,Q5M7T9,Q5QE79,Q5RLM2,Q62635,Q63424,Q63618,Q63751,Q6Q0N1,Q80WL1,Q8CIZ5,Q923S2,Q9WUW8,Q9WUW9                                                                                                                                                                                                                                                                           |
| 6096 | 1,5,9,11,1 2,3,4,6,7,8<br>2,14,15,16 ,10,13 | 41 | D4A5U3,O55004,O70257,O70377,O70594,O88339;Q4V882,P00774,P02631,P19468,P20761,P20766,P25809,P28570,P30904,P46844,P48508,P50115,P51907,P53790,P55091,P57113,P80299,P98089,Q05175,Q3T1J9,Q3ZAV1,Q5BJY9,Q5I0E9,Q5M7T9,Q5QE79,Q63424,Q63598,Q63618,Q64093,Q6MG61,Q6Q0N1,Q8CIZ5,Q9WTW7,Q9WUW8,Q9WUW9,Q9Z0W7                                                                                                                                                                                                                                               |

6097 1,5,9,11,1 2,3,4,6,7,8  
3,14,15,16 ,10,12

6098 1,5,9,12,1 2,3,4,6,7,8  
3,14,15,16 ,10,11

6099 1,5,10,11, 2,3,4,6,7,8  
12,13,14,1 ,9,16  
5

6100 1,5,10,11, 2,3,4,6,7,8  
12,13,14,1 ,9,15  
6

6101 1,5,10,11, 2,3,4,6,7,8  
12,13,15,1 ,9,14  
6

6102 1,5,10,11, 2,3,4,6,7,8  
12,14,15,1 ,9,13  
6

6103 1,5,10,11, 2,3,4,6,7,8  
13,14,15,1 ,9,12  
6

6104 1,5,10,12, 2,3,4,6,7,8  
13,14,15,1 ,9,11  
6

6105 1,5,11,12, 2,3,4,6,7,8  
13,14,15,1 ,9,10  
6

6106 1,6,7,8,9,1 2,3,4,5,13,  
0,11,12 14,15,16

6107 1,6,7,8,9,1 2,3,4,5,12,  
0,11,13 14,15,16

6108 1,6,7,8,9,1 2,3,4,5,12,  
0,11,14 13,15,16

6109 1,6,7,8,9,1 2,3,4,5,12,  
0,11,15 13,14,16

6110 1,6,7,8,9,1 2,3,4,5,12,  
0,11,16 13,14,15

6111 1,6,7,8,9,1 2,3,4,5,11,  
0,12,13 14,15,16

33 D4A5U3,O55004,O70377,O70417,P00774,P02631,P0DMW0;P0DMW1,P20761,P20762,P20766,  
P23739,P30904,P46844,P48508,P50115,P53790,P55091,P98089,Q05175,Q3ZAV1,Q5M7T9,Q5R  
LM2,Q63270,Q63598,Q63618,Q66HG3,Q6MG61,Q6Q0N1,Q8CIZ5,Q923S2,Q9JJ40,Q9R0T3,Q9  
WTW7

31 D4A5U3,O55004,O70417,P00774,P02631,P02780,P06761,P07150,P11598,P20761,P20762,P207  
66,P22273,P22282,P30904,P31430,P50115,P50280,P55091,P98089,Q4G075,Q5BJY9,Q5M7T9,Q  
5M8C6,Q5QE79,Q63617,Q6B345,Q6P6R2,Q8CIZ5,Q9R0T3,Q9WTW7

18 D4A5U3,O55004,O70417,P00774,P02631,P07151,P20646,P20761,P20762,P22006,P23593,P237  
39,P50115,P55091,P98089,Q5QE79,Q6TMA8,Q8CIZ5

12 D4A5U3,P00774,P20646,P20761,P23739,P35280,P50115,P55091,P98089,Q5QE79,Q6P6R2,Q8C  
Z5

15 D3ZHA0,D4A5U3,O70417,P00774,P08937,P20761,P23739,P50115,P55091,P98089,Q5QE79,Q62  
635,Q63751,Q6P6R2,Q8CIZ5

11 D4A5U3,O55004,P00774,P02631,P20761,P50115,P55091,P80299,P98089,Q5QE79,Q8CIZ5

13 D4A5U3,O70417,P00774,P02631,P20761,P23739,P26772,P50115,P55091,P98089,Q05702,Q5QE  
79,Q8CIZ5

24 D4A5U3,O70417,P00774,P02780,P06761,P07150,P11598,P20761,P22273,P22282,P23739,P3528  
0,P50115,P50280,P55091,P98089,Q5M8C6,Q5QE79,Q62902,Q63617,Q6P6R2,Q6P6S4,Q8CIZ5,  
Q9R0T3

23 D4A5U3,O35763,O55004,O70417,O70594,P00774,P02454,P02631,P17559,P20646,P20761,P207  
62,P20766,P23739,P50115,P55091,P70545,P98089,Q5QE79,Q63598,Q63618,Q6P6R2,Q8CIZ5

6 P21674,P29315,P35745,Q63493,Q812E4,Q9QW07

2 P29315,Q63617

3 P21674,P29315,Q812E4

7 P19629,P35745,P49134,Q63474,Q6P6S4,Q8CJ52,Q9QW07

11 P02782,P08723,P09456,P21674,P22283,P30120,P49134,Q63617,Q812E4,Q9JHB9,Q9QW07

4 P29315,P35745,P70549,Q4KLZ6



|      |                        |                         |    |                                                                                                                                                         |
|------|------------------------|-------------------------|----|---------------------------------------------------------------------------------------------------------------------------------------------------------|
| 6112 | 1,6,7,8,9,1<br>0,12,14 | 2,3,4,5,11,<br>13,15,16 | 3  | P21674,P29315,P35745                                                                                                                                    |
| 6113 | 1,6,7,8,9,1<br>0,12,15 | 2,3,4,5,11,<br>13,14,16 | 4  | P19629,P35745,Q4KLZ6,Q63474                                                                                                                             |
| 6114 | 1,6,7,8,9,1<br>0,12,16 | 2,3,4,5,11,<br>13,14,15 | 2  | P21674,P35745                                                                                                                                           |
| 6115 | 1,6,7,8,9,1<br>0,13,14 | 2,3,4,5,11,<br>12,15,16 | 3  | P29315,P35745,P70549                                                                                                                                    |
| 6116 | 1,6,7,8,9,1<br>0,13,15 | 2,3,4,5,11,<br>12,14,16 | 4  | P35745,P70549,Q4KLZ6,Q63474                                                                                                                             |
| 6117 | 1,6,7,8,9,1<br>0,13,16 | 2,3,4,5,11,<br>12,14,15 | 0  |                                                                                                                                                         |
| 6118 | 1,6,7,8,9,1<br>0,14,15 | 2,3,4,5,11,<br>12,13,16 | 2  | P35745,Q63474                                                                                                                                           |
| 6119 | 1,6,7,8,9,1<br>0,14,16 | 2,3,4,5,11,<br>12,13,15 | 1  | P21674                                                                                                                                                  |
| 6120 | 1,6,7,8,9,1<br>0,15,16 | 2,3,4,5,11,<br>12,13,14 | 2  | P19629,P35745                                                                                                                                           |
| 6121 | 1,6,7,8,9,1<br>1,12,13 | 2,3,4,5,10,<br>14,15,16 | 13 | BOLT89,iRT-<br>Kit_WR_fusion,P06911,P22283,P29315,Q09326,Q5GRG2,Q63493,Q63617,Q78P75,Q812E4,Q9JI<br>85,Q9QW07                                           |
| 6122 | 1,6,7,8,9,1<br>1,12,14 | 2,3,4,5,10,<br>13,15,16 | 8  | P06911,P12020,P21674,P29315,Q5GRG2,Q63493,Q812E4,Q9QW07                                                                                                 |
| 6123 | 1,6,7,8,9,1<br>1,12,15 | 2,3,4,5,10,<br>13,14,16 | 7  | iRT-Kit_WR_fusion,P35745,Q63493,Q6P6S4,Q812E4,Q8CJ52,Q9QW07                                                                                             |
| 6124 | 1,6,7,8,9,1<br>1,12,16 | 2,3,4,5,10,<br>13,14,15 | 19 | iRT-<br>Kit_WR_fusion,P02782,P06911,P08723,P09456,P21674,P22283,P30120,P46462,P63322,P97523,<br>Q5GRG2,Q63357,Q63493,Q63617,Q812E4,Q8CFN2,Q9JHB9,Q9QW07 |
| 6125 | 1,6,7,8,9,1<br>1,13,14 | 2,3,4,5,10,<br>12,15,16 | 7  | P0DMW0;P0DMW1,P29315,Q09326,Q5GRG2,Q63617,Q78P75,Q812E4                                                                                                 |
| 6126 | 1,6,7,8,9,1<br>1,13,15 | 2,3,4,5,10,<br>12,14,16 | 6  | P35745,Q63493,Q63617,Q6P6S4,Q8CJ52,Q9QW07                                                                                                               |
| 6127 | 1,6,7,8,9,1<br>1,13,16 | 2,3,4,5,10,<br>12,14,15 | 14 | P02782,P08723,P09456,P22283,P24368,P30120,P46462,P60905,Q63493,Q63617,Q812E4,Q9JH<br>B9,Q9JI85,Q9QW07                                                   |
| 6128 | 1,6,7,8,9,1<br>1,14,15 | 2,3,4,5,10,<br>12,13,16 | 5  | P0DMW0;P0DMW1,P35745,Q812E4,Q8CJ52,Q9QW07                                                                                                               |
| 6129 | 1,6,7,8,9,1<br>1,14,16 | 2,3,4,5,10,<br>12,13,15 | 12 | P02782,P08723,P09456,P21674,P22283,P30120,P46462,Q5GRG2,Q812E4,Q8CFN2,Q9JHB9,Q9<br>QW07                                                                 |
| 6130 | 1,6,7,8,9,1<br>1,15,16 | 2,3,4,5,10,<br>12,13,14 | 11 | P02782,P08723,P09456,P22283,P30120,Q63493,Q6P6S4,Q812E4,Q8CJ52,Q9JHB9,Q9QW07                                                                            |

|      |                         |                         |    |                                                                                                                            |
|------|-------------------------|-------------------------|----|----------------------------------------------------------------------------------------------------------------------------|
| 6131 | 1,6,7,8,9,1<br>2,13,14  | 2,3,4,5,10,<br>11,15,16 | 4  | P21674,P29315,P35745,P70549                                                                                                |
| 6132 | 1,6,7,8,9,1<br>2,13,15  | 2,3,4,5,10,<br>11,14,16 | 3  | P35745,P70549,Q4KLZ6                                                                                                       |
| 6133 | 1,6,7,8,9,1<br>2,13,16  | 2,3,4,5,10,<br>11,14,15 | 2  | P21674,P70549                                                                                                              |
| 6134 | 1,6,7,8,9,1<br>2,14,15  | 2,3,4,5,10,<br>11,13,16 | 1  | P35745                                                                                                                     |
| 6135 | 1,6,7,8,9,1<br>2,14,16  | 2,3,4,5,10,<br>11,13,15 | 1  | P21674                                                                                                                     |
| 6136 | 1,6,7,8,9,1<br>2,15,16  | 2,3,4,5,10,<br>11,13,14 | 4  | iRT-Kit_WR_fusion,P19629,P35745,Q9QW07                                                                                     |
| 6137 | 1,6,7,8,9,1<br>3,14,15  | 2,3,4,5,10,<br>11,12,16 | 3  | P0DMW0;P0DMW1,P35745,P70549                                                                                                |
| 6138 | 1,6,7,8,9,1<br>3,14,16  | 2,3,4,5,10,<br>11,12,15 | 0  |                                                                                                                            |
| 6139 | 1,6,7,8,9,1<br>3,15,16  | 2,3,4,5,10,<br>11,12,14 | 2  | P35745,P70549                                                                                                              |
| 6140 | 1,6,7,8,9,1<br>4,15,16  | 2,3,4,5,10,<br>11,12,13 | 3  | P35745,P47967,P97840                                                                                                       |
| 6141 | 1,6,7,8,10,<br>11,12,13 | 2,3,4,5,9,1<br>4,15,16  | 5  | P06911,P22283,P29315,Q63493,Q9JI85                                                                                         |
| 6142 | 1,6,7,8,10,<br>11,12,14 | 2,3,4,5,9,1<br>3,15,16  | 6  | P06911,P12020,P21674,P29315,Q5GRG2,Q9QW07                                                                                  |
| 6143 | 1,6,7,8,10,<br>11,12,15 | 2,3,4,5,9,1<br>3,14,16  | 3  | P19629,P35745,Q9QW07                                                                                                       |
| 6144 | 1,6,7,8,10,<br>11,12,16 | 2,3,4,5,9,1<br>3,14,15  | 17 | P02782,P04905,P06911,P08010,P08723,P09456,P12020,P19629,P21674,P22283,P24368,P30120<br>,P46462,Q5GRG2,Q63493,Q9JHB9,Q9QW07 |
| 6145 | 1,6,7,8,10,<br>11,13,14 | 2,3,4,5,9,1<br>2,15,16  | 4  | P22283,P29315,Q5GRG2,Q99041                                                                                                |
| 6146 | 1,6,7,8,10,<br>11,13,15 | 2,3,4,5,9,1<br>2,14,16  | 2  | P19629,P22283                                                                                                              |
| 6147 | 1,6,7,8,10,<br>11,13,16 | 2,3,4,5,9,1<br>2,14,15  | 13 | P02781,P02782,P08723,P09456,P0C0A9,P22283,P24368,P30120,P46462,Q99041,Q9JHB9,Q9JI8<br>5,Q9QW07                             |
| 6148 | 1,6,7,8,10,<br>11,14,15 | 2,3,4,5,9,1<br>2,13,16  | 2  | Q8CJ52,Q9QW07                                                                                                              |
| 6149 | 1,6,7,8,10,<br>11,14,16 | 2,3,4,5,9,1<br>2,13,15  | 13 | P02782,P08723,P09456,P0C0A9,P21674,P22283,P30120,P46462,Q5GRG2,Q812E4,Q99041,Q9J<br>HB9,Q9QW07                             |
| 6150 | 1,6,7,8,10,<br>11,15,16 | 2,3,4,5,9,1<br>2,13,14  | 9  | P02782,P08723,P0C0A9,P19629,P22283,P30120,Q8CJ52,Q9JHB9,Q9QW07                                                             |

|      |                                             |    |                                                                                                                                                                          |
|------|---------------------------------------------|----|--------------------------------------------------------------------------------------------------------------------------------------------------------------------------|
| 6151 | 1,6,7,8,10, 2,3,4,5,9,1<br>12,13,14 1,15,16 | 2  | P29315,P70549                                                                                                                                                            |
| 6152 | 1,6,7,8,10, 2,3,4,5,9,1<br>12,13,15 1,14,16 | 4  | P19629,P35745,P70549,Q4KLZ6                                                                                                                                              |
| 6153 | 1,6,7,8,10, 2,3,4,5,9,1<br>12,13,16 1,14,15 | 1  | P70549                                                                                                                                                                   |
| 6154 | 1,6,7,8,10, 2,3,4,5,9,1<br>12,14,15 1,13,16 | 4  | P19629,P35745,P70549,Q63474                                                                                                                                              |
| 6155 | 1,6,7,8,10, 2,3,4,5,9,1<br>12,14,16 1,13,15 | 2  | P21674,P57113                                                                                                                                                            |
| 6156 | 1,6,7,8,10, 2,3,4,5,9,1<br>12,15,16 1,13,14 | 4  | P19629,P35745,P57113,Q63598                                                                                                                                              |
| 6157 | 1,6,7,8,10, 2,3,4,5,9,1<br>13,14,15 1,12,16 | 3  | P35745,P70549,Q63474                                                                                                                                                     |
| 6158 | 1,6,7,8,10, 2,3,4,5,9,1<br>13,14,16 1,12,15 | 3  | P36376,P57113,P70549                                                                                                                                                     |
| 6159 | 1,6,7,8,10, 2,3,4,5,9,1<br>13,15,16 1,12,14 | 3  | P19629,P57113,P70549                                                                                                                                                     |
| 6160 | 1,6,7,8,10, 2,3,4,5,9,1<br>14,15,16 1,12,13 | 2  | P19629,P57113                                                                                                                                                            |
| 6161 | 1,6,7,8,11, 2,3,4,5,9,1<br>12,13,14 0,15,16 | 9  | P06911,P12020,P22283,P29315,P46462,Q09326,Q5GRG2,Q63493,Q9JI85                                                                                                           |
| 6162 | 1,6,7,8,11, 2,3,4,5,9,1<br>12,13,15 0,14,16 | 5  | P22283,Q5GRG2,Q63493,Q9JI85,Q9QW07                                                                                                                                       |
| 6163 | 1,6,7,8,11, 2,3,4,5,9,1<br>12,13,16 0,14,15 | 23 | O35547,P02780,P02781,P02782,P05369,P06911,P07647,P08723,P09456,P12020,P22283,P2436<br>8,P30120,P46462,Q5GRG2,Q5M8C6,Q63493,Q63617,Q812E4,Q8CFN2,Q9JHB9,Q9JI85,Q9QW0<br>7 |
| 6164 | 1,6,7,8,11, 2,3,4,5,9,1<br>12,14,15 0,13,16 | 5  | P06911,P12020,Q5GRG2,Q8CJ52,Q9QW07                                                                                                                                       |
| 6165 | 1,6,7,8,11, 2,3,4,5,9,1<br>12,14,16 0,13,15 | 20 | O35547,P02781,P02782,P06911,P08723,P09456,P0C0A9,P12020,P21674,P22283,P30120,P4646<br>2,Q5GRG2,Q5M8C6,Q63493,Q812E4,Q8CFN2,Q9JHB9,Q9QW07,Q9QZK9                          |
| 6166 | 1,6,7,8,11, 2,3,4,5,9,1<br>12,15,16 0,13,14 | 16 | IRT-<br>Kit_WR_fusion,P02782,P08723,P09456,P0C0A9,P12020,P19629,P22283,P30120,P46462,Q5GRG<br>2,Q63493,Q8CJ52,Q9JHB9,Q9QW07,Q9QZK9                                       |
| 6167 | 1,6,7,8,11, 2,3,4,5,9,1<br>13,14,15 0,12,16 | 4  | Q09326,Q5GRG2,Q8CJ52,Q99041                                                                                                                                              |
| 6168 | 1,6,7,8,11, 2,3,4,5,9,1<br>13,14,16 0,12,15 | 18 | P02781,P02782,P08723,P09456,P0C0A9,P22283,P24368,P30120,P34901,P36376,P46462,Q5GR<br>G2,Q812E4,Q8CFN2,Q99041,Q9JHB9,Q9JI85,Q9QW07                                        |
| 6169 | 1,6,7,8,11, 2,3,4,5,9,1<br>13,15,16 0,12,14 | 14 | P02781,P02782,P08723,P09456,P0C0A9,P22283,P24368,P30120,P46462,Q63493,Q8CJ52,Q990<br>41,Q9JHB9,Q9QW07                                                                    |

|      |                                             |                                                                                                          |
|------|---------------------------------------------|----------------------------------------------------------------------------------------------------------|
| 6170 | 1,6,7,8,11, 2,3,4,5,9,1<br>14,15,16 0,12,13 | 14 P02782,P08723,P09456,P0C0A9,P22283,P30120,P46462,Q5GRG2,Q812E4,Q8CJ52,Q99041,Q9J<br>HB9,Q9QW07,Q9QZK9 |
| 6171 | 1,6,7,8,12, 2,3,4,5,9,1<br>13,14,15 0,11,16 | 3 P35745,P70549,Q9Z2L0                                                                                   |
| 6172 | 1,6,7,8,12, 2,3,4,5,9,1<br>13,14,16 0,11,15 | 2 P70549,Q9Z2L0                                                                                          |
| 6173 | 1,6,7,8,12, 2,3,4,5,9,1<br>13,15,16 0,11,14 | 2 P70549,Q9Z2L0                                                                                          |
| 6174 | 1,6,7,8,12, 2,3,4,5,9,1<br>14,15,16 0,11,13 | 2 P70549,Q9Z2L0                                                                                          |
| 6175 | 1,6,7,8,13, 2,3,4,5,9,1<br>14,15,16 0,11,12 | 3 P70549,Q62714,Q9Z2L0                                                                                   |
| 6176 | 1,6,7,9,10, 2,3,4,5,8,1<br>11,12,13 4,15,16 | 4 BOLT89,P00762,P20762,Q62761;Q62762;Q62763                                                              |
| 6177 | 1,6,7,9,10, 2,3,4,5,8,1<br>11,12,14 3,15,16 | 4 P00762,P00774,P05539,P21674                                                                            |
| 6178 | 1,6,7,9,10, 2,3,4,5,8,1<br>11,12,15 3,14,16 | 4 P00762,P35745,Q62761;Q62762;Q62763,Q9WUW8                                                              |
| 6179 | 1,6,7,9,10, 2,3,4,5,8,1<br>11,12,16 3,14,15 | 1 P21674                                                                                                 |
| 6180 | 1,6,7,9,10, 2,3,4,5,8,1<br>11,13,14 2,15,16 | 6 P00762,P00774,P05539,P0DMW0;P0DMW1,P36376,Q5PQL7                                                       |
| 6181 | 1,6,7,9,10, 2,3,4,5,8,1<br>11,13,15 2,14,16 | 1 P00762                                                                                                 |
| 6182 | 1,6,7,9,10, 2,3,4,5,8,1<br>11,13,16 2,14,15 | 2 P36376,Q9R168                                                                                          |
| 6183 | 1,6,7,9,10, 2,3,4,5,8,1<br>11,14,15 2,13,16 | 3 P00762,P00774,P05539                                                                                   |
| 6184 | 1,6,7,9,10, 2,3,4,5,8,1<br>11,14,16 2,13,15 | 4 P00774,P21674,P36376,Q9R168                                                                            |
| 6185 | 1,6,7,9,10, 2,3,4,5,8,1<br>11,15,16 2,13,14 | 1 Q8CJ52                                                                                                 |
| 6186 | 1,6,7,9,10, 2,3,4,5,8,1<br>12,13,14 1,15,16 | 11 P00762,P00774,P05539,P29315,P70549,Q4FZU2,Q6IFU7,Q6IFU8,Q6IFW6,Q6IG02,Q6IMF3                          |
| 6187 | 1,6,7,9,10, 2,3,4,5,8,1<br>12,13,15 1,14,16 | 5 P00762,P05539,P35745,P70549,Q4KLZ6                                                                     |
| 6188 | 1,6,7,9,10, 2,3,4,5,8,1<br>12,13,16 1,14,15 | 4 Q6IFU7,Q6IFU8,Q6IFW6,Q6IG02                                                                            |
| 6189 | 1,6,7,9,10, 2,3,4,5,8,1<br>12,14,15 1,13,16 | 4 P00762,P00774,P05539,P35745                                                                            |

|      |                                             |                                                                                                                 |
|------|---------------------------------------------|-----------------------------------------------------------------------------------------------------------------|
| 6190 | 1,6,7,9,10, 2,3,4,5,8,1<br>12,14,16 1,13,15 | 6 P00774,P21674,Q6IFU7,Q6IFU8,Q6IFW6,Q6IG02                                                                     |
| 6191 | 1,6,7,9,10, 2,3,4,5,8,1<br>12,15,16 1,13,14 | 2 P00774,P35745                                                                                                 |
| 6192 | 1,6,7,9,10, 2,3,4,5,8,1<br>13,14,15 1,12,16 | 7 P00762,P00774,P01835,P05539,P70549,Q00715,Q5PQL7                                                              |
| 6193 | 1,6,7,9,10, 2,3,4,5,8,1<br>13,14,16 1,12,15 | 9 P00774,P05539,P36376,Q5PQL7,Q6IFU7,Q6IFU8,Q6IFW6,Q6IG02,Q9R168                                                |
| 6194 | 1,6,7,9,10, 2,3,4,5,8,1<br>13,15,16 1,12,14 | 4 P00774,P11883,P70549,Q5PQL7                                                                                   |
| 6195 | 1,6,7,9,10, 2,3,4,5,8,1<br>14,15,16 1,12,13 | 5 P00774,P05539,P47967,Q5I0D1,Q5PQL7                                                                            |
| 6196 | 1,6,7,9,11, 2,3,4,5,8,1<br>12,13,14 0,15,16 | 12 B0LT89,O70594,P05539,P0DMW0;P0DMW1,P20762,P53790,Q62761;Q62762;Q62763,Q63270,<br>Q63355,Q63424,Q63618,Q8R431 |
| 6197 | 1,6,7,9,11, 2,3,4,5,8,1<br>12,13,15 0,14,16 | 4 P20760,P20762,Q62761;Q62762;Q62763,Q9WUW8                                                                     |
| 6198 | 1,6,7,9,11, 2,3,4,5,8,1<br>12,13,16 0,14,15 | 4 P20762,P54921,P63322,Q62753                                                                                   |
| 6199 | 1,6,7,9,11, 2,3,4,5,8,1<br>12,14,15 0,13,16 | 7 P00762,P00774,P05539,P28570,Q62761;Q62762;Q62763,Q63618,Q9WUW8                                                |
| 6200 | 1,6,7,9,11, 2,3,4,5,8,1<br>12,14,16 0,13,15 | 4 P21674,Q498D9,Q63618,Q9QW07                                                                                   |
| 6201 | 1,6,7,9,11, 2,3,4,5,8,1<br>12,15,16 0,13,14 | 4 P25809,Q8CJ52,Q9QW07,Q9WUW8                                                                                   |
| 6202 | 1,6,7,9,11, 2,3,4,5,8,1<br>13,14,15 0,12,16 | 4 P00774,P05539,P0DMW0;P0DMW1,Q5PQL7                                                                            |
| 6203 | 1,6,7,9,11, 2,3,4,5,8,1<br>13,14,16 0,12,15 | 6 P0DMW0;P0DMW1,P12368,P34901,P36376,Q498D9,Q9R168                                                              |
| 6204 | 1,6,7,9,11, 2,3,4,5,8,1<br>13,15,16 0,12,14 | 2 Q5RLM2,Q8CJ52                                                                                                 |
| 6205 | 1,6,7,9,11, 2,3,4,5,8,1<br>14,15,16 0,12,13 | 4 P00774,P0DMW0;P0DMW1,Q8CJ52,Q9QW07                                                                            |
| 6206 | 1,6,7,9,12, 2,3,4,5,8,1<br>13,14,15 0,11,16 | 6 P00762,P00774,P01835,P05539,P70549,Q5BJY9                                                                     |
| 6207 | 1,6,7,9,12, 2,3,4,5,8,1<br>13,14,16 0,11,15 | 8 P00774,P01835,P05539,P21674,Q6IFU7,Q6IFU8,Q6IFW6,Q6IG02                                                       |
| 6208 | 1,6,7,9,12, 2,3,4,5,8,1<br>13,15,16 0,11,14 | 3 P01835,P70549,Q6B345                                                                                          |
| 6209 | 1,6,7,9,12, 2,3,4,5,8,1<br>14,15,16 0,11,13 | 1 P00774                                                                                                        |

|      |                                             |                                                    |
|------|---------------------------------------------|----------------------------------------------------|
| 6210 | 1,6,7,9,13, 2,3,4,5,8,1<br>14,15,16 0,11,12 | 5 P00774,P01835,P05539,P70549,Q5PQL7               |
| 6211 | 1,6,7,10,1 2,3,4,5,8,9<br>1,12,13,14 ,15,16 | 6 P00774,P05539,P20760,P23593,P29315,P36376        |
| 6212 | 1,6,7,10,1 2,3,4,5,8,9<br>1,12,13,15 ,14,16 | 3 P00774,P20760,P23593                             |
| 6213 | 1,6,7,10,1 2,3,4,5,8,9<br>1,12,13,16 ,14,15 | 2 P00774,P36376                                    |
| 6214 | 1,6,7,10,1 2,3,4,5,8,9<br>1,12,14,15 ,13,16 | 3 P00774,P05539,P20760                             |
| 6215 | 1,6,7,10,1 2,3,4,5,8,9<br>1,12,14,16 ,13,15 | 3 P00774,P21674,P36376                             |
| 6216 | 1,6,7,10,1 2,3,4,5,8,9<br>1,12,15,16 ,13,14 | 3 P00774,P20760,Q9QW07                             |
| 6217 | 1,6,7,10,1 2,3,4,5,8,9<br>1,13,14,15 ,12,16 | 6 P00774,P01835,P05539,P20760,P36376,Q5PQL7        |
| 6218 | 1,6,7,10,1 2,3,4,5,8,9<br>1,13,14,16 ,12,15 | 3 P00774,P34901,P36376                             |
| 6219 | 1,6,7,10,1 2,3,4,5,8,9<br>1,13,15,16 ,12,14 | 2 P00774,P36376                                    |
| 6220 | 1,6,7,10,1 2,3,4,5,8,9<br>1,14,15,16 ,12,13 | 2 P00774,P36376                                    |
| 6221 | 1,6,7,10,1 2,3,4,5,8,9<br>2,13,14,15 ,11,16 | 5 O88797,P00774,P01835,P05539,P70549               |
| 6222 | 1,6,7,10,1 2,3,4,5,8,9<br>2,13,14,16 ,11,15 | 7 P00774,P01835,P05539,P36376,P70549,Q6IFU8,Q6IG02 |
| 6223 | 1,6,7,10,1 2,3,4,5,8,9<br>2,13,15,16 ,11,14 | 3 P00774,P01835,P70549                             |
| 6224 | 1,6,7,10,1 2,3,4,5,8,9<br>2,14,15,16 ,11,13 | 2 P00774,P05539                                    |
| 6225 | 1,6,7,10,1 2,3,4,5,8,9<br>3,14,15,16 ,11,12 | 7 O88797,P00774,P01835,P05539,P36376,P70549,Q5PQL7 |
| 6226 | 1,6,7,11,1 2,3,4,5,8,9<br>2,13,14,15 ,10,16 | 5 P00774,P01835,P05539,P20760,P70545               |
| 6227 | 1,6,7,11,1 2,3,4,5,8,9<br>2,13,14,16 ,10,15 | 4 P00774,P01835,P34901,P36376                      |
| 6228 | 1,6,7,11,1 2,3,4,5,8,9<br>2,13,15,16 ,10,14 | 2 P01835,P20760                                    |
| 6229 | 1,6,7,11,1 2,3,4,5,8,9<br>2,14,15,16 ,10,13 | 3 P00774,Q8CJ52,Q9QW07                             |

|      |                          |                        |   |                                           |
|------|--------------------------|------------------------|---|-------------------------------------------|
| 6230 | 1,6,7,11,1<br>3,14,15,16 | 2,3,4,5,8,9<br>,10,12  | 4 | P00774,P01835,P36376,Q8CJ52               |
| 6231 | 1,6,7,12,1<br>3,14,15,16 | 2,3,4,5,8,9<br>,10,11  | 6 | P00774,P01835,P05539,P70549,Q6B345,Q9Z2L0 |
| 6232 | 1,6,8,9,10,<br>11,12,13  | 2,3,4,5,7,1<br>4,15,16 | 1 | BOLT89                                    |
| 6233 | 1,6,8,9,10,<br>11,12,14  | 2,3,4,5,7,1<br>3,15,16 | 2 | BOLT89,P21674                             |
| 6234 | 1,6,8,9,10,<br>11,12,15  | 2,3,4,5,7,1<br>3,14,16 | 4 | BOLT89,P35745,Q6P6S4,Q9WUW8               |
| 6235 | 1,6,8,9,10,<br>11,12,16  | 2,3,4,5,7,1<br>3,14,15 | 2 | P21674,Q9QW07                             |
| 6236 | 1,6,8,9,10,<br>11,13,14  | 2,3,4,5,7,1<br>2,15,16 | 1 | BOLT89                                    |
| 6237 | 1,6,8,9,10,<br>11,13,15  | 2,3,4,5,7,1<br>2,14,16 | 2 | BOLT89,Q5RLM2                             |
| 6238 | 1,6,8,9,10,<br>11,13,16  | 2,3,4,5,7,1<br>2,14,15 | 2 | BOLT89,O89117                             |
| 6239 | 1,6,8,9,10,<br>11,14,15  | 2,3,4,5,7,1<br>2,13,16 | 2 | P47967,P97840                             |
| 6240 | 1,6,8,9,10,<br>11,14,16  | 2,3,4,5,7,1<br>2,13,15 | 4 | O89117,P21674,P97840,Q812E4               |
| 6241 | 1,6,8,9,10,<br>11,15,16  | 2,3,4,5,7,1<br>2,13,14 | 2 | Q6P6S4,Q9QW07                             |
| 6242 | 1,6,8,9,10,<br>12,13,14  | 2,3,4,5,7,1<br>1,15,16 | 4 | P08649,P17988,P29315,P70549               |
| 6243 | 1,6,8,9,10,<br>12,13,15  | 2,3,4,5,7,1<br>1,14,16 | 4 | P08649,P35745,P70549,Q4KLZ6               |
| 6244 | 1,6,8,9,10,<br>12,13,16  | 2,3,4,5,7,1<br>1,14,15 | 1 | P08649                                    |
| 6245 | 1,6,8,9,10,<br>12,14,15  | 2,3,4,5,7,1<br>1,13,16 | 3 | P35745,P47967,P97840                      |
| 6246 | 1,6,8,9,10,<br>12,14,16  | 2,3,4,5,7,1<br>1,13,15 | 1 | P21674                                    |
| 6247 | 1,6,8,9,10,<br>12,15,16  | 2,3,4,5,7,1<br>1,13,14 | 1 | P35745                                    |
| 6248 | 1,6,8,9,10,<br>13,14,15  | 2,3,4,5,7,1<br>1,12,16 | 6 | P35745,P47967,P70549,P97840,Q00715,Q5PQL7 |
| 6249 | 1,6,8,9,10,<br>13,14,16  | 2,3,4,5,7,1<br>1,12,15 | 2 | P47967,P97840                             |

|      |                                             |                                                                                                                           |
|------|---------------------------------------------|---------------------------------------------------------------------------------------------------------------------------|
| 6250 | 1,6,8,9,10, 2,3,4,5,7,1<br>13,15,16 1,12,14 | 1 P70549                                                                                                                  |
| 6251 | 1,6,8,9,10, 2,3,4,5,7,1<br>14,15,16 1,12,13 | 3 P47967,P97840,Q5I0D1                                                                                                    |
| 6252 | 1,6,8,9,11, 2,3,4,5,7,1<br>12,13,14 0,15,16 | 17 BOLT89,O70594,P17988,P18297,P19468,P20766,P48508,P53790,P63095,Q5I0E9,Q63270,Q63355,Q63424,Q64093,Q71MB6,Q8R431,Q9WTW7 |
| 6253 | 1,6,8,9,11, 2,3,4,5,7,1<br>12,13,15 0,14,16 | 5 BOLT89,P18297,Q5RLM2,Q71MB6,Q9WUW8                                                                                      |
| 6254 | 1,6,8,9,11, 2,3,4,5,7,1<br>12,13,16 0,14,15 | 7 BOLT89,P30120,P54921,Q5RKI1,Q63355,Q63357,Q812E4                                                                        |
| 6255 | 1,6,8,9,11, 2,3,4,5,7,1<br>12,14,15 0,13,16 | 9 P18297,P19468,P28570,Q63355,Q63424,Q63618,Q64093,Q9QW07,Q9WUW8                                                          |
| 6256 | 1,6,8,9,11, 2,3,4,5,7,1<br>12,14,16 0,13,15 | 9 O70594,P21674,P63095,Q5RKI1,Q63355,Q63357,Q63618,Q812E4,Q9QW07                                                          |
| 6257 | 1,6,8,9,11, 2,3,4,5,7,1<br>12,15,16 0,13,14 | 2 Q9QW07,Q9WUW8                                                                                                           |
| 6258 | 1,6,8,9,11, 2,3,4,5,7,1<br>13,14,15 0,12,16 | 6 BOLT89,P0DMW0;P0DMW1,P18297,P97840,Q5RLM2,Q71MB6                                                                        |
| 6259 | 1,6,8,9,11, 2,3,4,5,7,1<br>13,14,16 0,12,15 | 9 BOLT89,O89117,P0DMW0;P0DMW1,P12368,P30120,P34901,P97840,Q5RKI1,Q812E4                                                   |
| 6260 | 1,6,8,9,11, 2,3,4,5,7,1<br>13,15,16 0,12,14 | 1 Q5RLM2                                                                                                                  |
| 6261 | 1,6,8,9,11, 2,3,4,5,7,1<br>14,15,16 0,12,13 | 4 P47967,P97840,Q812E4,Q9QW07                                                                                             |
| 6262 | 1,6,8,9,12, 2,3,4,5,7,1<br>13,14,15 0,11,16 | 3 P20766,P35745,P70549                                                                                                    |
| 6263 | 1,6,8,9,12, 2,3,4,5,7,1<br>13,14,16 0,11,15 | 1 P21674                                                                                                                  |
| 6264 | 1,6,8,9,12, 2,3,4,5,7,1<br>13,15,16 0,11,14 | 1 P70549                                                                                                                  |
| 6265 | 1,6,8,9,12, 2,3,4,5,7,1<br>14,15,16 0,11,13 | 2 P47967,P97840                                                                                                           |
| 6266 | 1,6,8,9,13, 2,3,4,5,7,1<br>14,15,16 0,11,12 | 4 P47967,P70549,P97840,Q5I0D1                                                                                             |
| 6267 | 1,6,8,10,1 2,3,4,5,7,9<br>1,12,13,14 ,15,16 | 0                                                                                                                         |
| 6268 | 1,6,8,10,1 2,3,4,5,7,9<br>1,12,13,15 ,14,16 | 0                                                                                                                         |
| 6269 | 1,6,8,10,1 2,3,4,5,7,9<br>1,12,13,16 ,14,15 | 1 P30120                                                                                                                  |



|      |                                             |                                                                                                                                                                                                                                     |
|------|---------------------------------------------|-------------------------------------------------------------------------------------------------------------------------------------------------------------------------------------------------------------------------------------|
| 6270 | 1,6,8,10,1 2,3,4,5,7,9<br>1,12,14,15 ,13,16 | 0                                                                                                                                                                                                                                   |
| 6271 | 1,6,8,10,1 2,3,4,5,7,9<br>1,12,14,16 ,13,15 | 2 P21674,Q9QW07                                                                                                                                                                                                                     |
| 6272 | 1,6,8,10,1 2,3,4,5,7,9<br>1,12,15,16 ,13,14 | 1 Q9QW07                                                                                                                                                                                                                            |
| 6273 | 1,6,8,10,1 2,3,4,5,7,9<br>1,13,14,15 ,12,16 | 0                                                                                                                                                                                                                                   |
| 6274 | 1,6,8,10,1 2,3,4,5,7,9<br>1,13,14,16 ,12,15 | 2 O89117,P30120                                                                                                                                                                                                                     |
| 6275 | 1,6,8,10,1 2,3,4,5,7,9<br>1,13,15,16 ,12,14 | 0                                                                                                                                                                                                                                   |
| 6276 | 1,6,8,10,1 2,3,4,5,7,9<br>1,14,15,16 ,12,13 | 1 Q9QW07                                                                                                                                                                                                                            |
| 6277 | 1,6,8,10,1 2,3,4,5,7,9<br>2,13,14,15 ,11,16 | 2 P08649,P70549                                                                                                                                                                                                                     |
| 6278 | 1,6,8,10,1 2,3,4,5,7,9<br>2,13,14,16 ,11,15 | 4 P08649,P14668,P35280,P70549                                                                                                                                                                                                       |
| 6279 | 1,6,8,10,1 2,3,4,5,7,9<br>2,13,15,16 ,11,14 | 2 P08649,P70549                                                                                                                                                                                                                     |
| 6280 | 1,6,8,10,1 2,3,4,5,7,9<br>2,14,15,16 ,11,13 | 1 P00774                                                                                                                                                                                                                            |
| 6281 | 1,6,8,10,1 2,3,4,5,7,9<br>3,14,15,16 ,11,12 | 4 P00774,P14668,P70549,P70709                                                                                                                                                                                                       |
| 6282 | 1,6,8,11,1 2,3,4,5,7,9<br>2,13,14,15 ,10,16 | 1 P20766                                                                                                                                                                                                                            |
| 6283 | 1,6,8,11,1 2,3,4,5,7,9<br>2,13,14,16 ,10,15 | 2 P30120,Q5RKI1                                                                                                                                                                                                                     |
| 6284 | 1,6,8,11,1 2,3,4,5,7,9<br>2,13,15,16 ,10,14 | 2 P30120,Q9QW07                                                                                                                                                                                                                     |
| 6285 | 1,6,8,11,1 2,3,4,5,7,9<br>2,14,15,16 ,10,13 | 1 Q9QW07                                                                                                                                                                                                                            |
| 6286 | 1,6,8,11,1 2,3,4,5,7,9<br>3,14,15,16 ,10,12 | 1 P30120                                                                                                                                                                                                                            |
| 6287 | 1,6,8,12,1 2,3,4,5,7,9<br>3,14,15,16 ,10,11 | 2 P20766,P70549                                                                                                                                                                                                                     |
| 6288 | 1,6,9,10,1 2,3,4,5,7,8<br>1,12,13,14 ,15,16 | B0LT89,O70594,P00774,P05539,P08649,P17988,P19468,P20646,P20760,P20761,P20762,P46844<br>29 ,P48508,P53790,Q05175,Q5I0E9,Q5M7T9,Q62761;Q62762;Q62763,Q63270,Q63424,Q64093,Q<br>6Q0N1,Q6TMA8,Q8CIZ5,Q8R431,Q9WTW7,Q9WUW8,Q9Z0V6,Q9Z0W7 |
| 6289 | 1,6,9,10,1 2,3,4,5,7,8<br>1,12,13,15 ,14,16 | 15 B0LT89,D3ZHA0,D4A5U3,P00774,P08649,P20646,P20760,P20761,P20762,Q4G075,Q5RLM2,Q6<br>2761;Q62762;Q62763,Q6TMA8,Q8CIZ5,Q9WUW8                                                                                                       |

|      |                          |                       |    |                                                                                                                                                                                                                                                                                                                                                                                                                              |
|------|--------------------------|-----------------------|----|------------------------------------------------------------------------------------------------------------------------------------------------------------------------------------------------------------------------------------------------------------------------------------------------------------------------------------------------------------------------------------------------------------------------------|
| 6290 | 1,6,9,10,1<br>1,12,13,16 | 2,3,4,5,7,8<br>,14,15 | 12 | B0LT89,D4A5U3,P08649,P20646,P20761,P20762,P45592,Q4G075,Q6PCU2,Q6TMA8,Q8CIZ5,Q9WUW8                                                                                                                                                                                                                                                                                                                                          |
| 6291 | 1,6,9,10,1<br>1,12,14,15 | 2,3,4,5,7,8<br>,13,16 | 19 | B0LT89,D4A5U3,O70594,P00762,P00774,P05539,P08649,P20646,P20760,P20761,P20762,P28570,P46844,Q4G075,Q5I0D7,Q62761;Q62762;Q62763,Q6TMA8,Q8CIZ5,Q9WUW8                                                                                                                                                                                                                                                                           |
| 6292 | 1,6,9,10,1<br>1,12,14,16 | 2,3,4,5,7,8<br>,13,15 | 12 | D4A5U3,O70594,P00774,P20646,P20761,P21674,Q63618,Q6PCU2,Q6Q0N1,Q6TMA8,Q8CIZ5,Q9WUW8                                                                                                                                                                                                                                                                                                                                          |
| 6293 | 1,6,9,10,1<br>1,12,15,16 | 2,3,4,5,7,8<br>,13,14 | 13 | B0BNN3,D3ZHA0,D4A5U3,P00774,P08649,P08937,P20761,P25809,Q4G075,Q5QE79,Q6TMA8,Q8CIZ5,Q9WUW8                                                                                                                                                                                                                                                                                                                                   |
| 6294 | 1,6,9,10,1<br>1,13,14,15 | 2,3,4,5,7,8<br>,12,16 | 13 | B0LT89,D4A5U3,P00774,P05539,P0DMW0;P0DMW1,P20760,P20761,P20762,P46844,Q5PQL7,Q5RLM2,Q6TMA8,Q8CIZ5                                                                                                                                                                                                                                                                                                                            |
| 6295 | 1,6,9,10,1<br>1,13,14,16 | 2,3,4,5,7,8<br>,12,15 | 9  | B0LT89,O89117,P00774,P20761,P34901,P36376,Q5PQL7,Q6TMA8,Q8CIZ5                                                                                                                                                                                                                                                                                                                                                               |
| 6296 | 1,6,9,10,1<br>1,13,15,16 | 2,3,4,5,7,8<br>,12,14 | 12 | B0LT89,D4A5U3,O70417,P00774,P08937,P20761,Q4G075,Q5RLM2,Q63751,Q6TMA8,Q8CIZ5,Q9WUW8                                                                                                                                                                                                                                                                                                                                          |
| 6297 | 1,6,9,10,1<br>1,14,15,16 | 2,3,4,5,7,8<br>,12,13 | 8  | D4A5U3,P00774,P20761,P25809,P47967,P97840,Q6TMA8,Q8CIZ5                                                                                                                                                                                                                                                                                                                                                                      |
| 6298 | 1,6,9,10,1<br>2,13,14,15 | 2,3,4,5,7,8<br>,11,16 | 19 | D4A5U3,P00762,P00774,P02780,P02781,P05539,P06760,P08649,P20646,P20761,P20762,P22273,P70549,Q00715,Q4G075,Q5M8C6,Q5PQL7,Q6TMA8,Q8CIZ5                                                                                                                                                                                                                                                                                         |
| 6299 | 1,6,9,10,1<br>2,13,14,16 | 2,3,4,5,7,8<br>,11,15 | 17 | P00774,P06760,P08649,P20646,P20761,Q4FZU2,Q4G075,Q6IFU7,Q6IFU8,Q6IFW6,Q6IG02,Q6IMF3,Q6P6Q2,Q6TMA8,Q8CIZ5,Q9WTT6,Q9Z0V6                                                                                                                                                                                                                                                                                                       |
| 6300 | 1,6,9,10,1<br>2,13,15,16 | 2,3,4,5,7,8<br>,11,14 | 14 | D4A5U3,P00774,P06760,P07150,P08649,P08937,P20761,P70549,Q4G075,Q5QE79,Q63751,Q6B345,Q6TMA8,Q8CIZ5                                                                                                                                                                                                                                                                                                                            |
| 6301 | 1,6,9,10,1<br>2,14,15,16 | 2,3,4,5,7,8<br>,11,13 | 11 | D4A5U3,P00774,P06760,P08649,P20761,P22273,P25809,P47967,Q4G075,Q6TMA8,Q8CIZ5                                                                                                                                                                                                                                                                                                                                                 |
| 6302 | 1,6,9,10,1<br>3,14,15,16 | 2,3,4,5,7,8<br>,11,12 | 15 | D4A5U3,P00774,P02780,P06760,P08649,P22273,P47967,P70709,P97840,Q00715,Q4G075,Q5I0D1,Q5PQL7,Q6TMA8,Q8CIZ5                                                                                                                                                                                                                                                                                                                     |
| 6303 | 1,6,9,11,1<br>2,13,14,15 | 2,3,4,5,7,8<br>,10,16 | 56 | B0LT89,D4A5U3,O35077,O35763,O55004,O70257,O70377,O70594,P00774,P05539,P07151,P0DMW0;P0DMW1,P18757,P19468,P20646,P20760,P20761,P20762,P20766,P28570,P36970,P46413,P46720,P46844,P48508,P53790,Q03248,Q05175,Q3ZAV1,Q5BJY9,Q5I0E9,Q5M7T9,Q5RLM2,Q62687,Q62761;Q62762;Q62763,Q63270,Q63355,Q63424,Q63618,Q64093,Q64602,Q6AY41,Q6MG61,Q6Q0N1,Q6TMA8,Q71MB6,Q80W57,Q8CIZ5,Q8R431,Q923S2,Q9JJ19,Q9JJ40,Q9WTW7,Q9WUW8,Q9WUW9,Q9Z0W7 |
| 6304 | 1,6,9,11,1<br>2,13,14,16 | 2,3,4,5,7,8<br>,10,15 | 45 | B0LT89,O35763,O70377,O70594,O88339;Q4V882,P00774,P10536,P12368,P19468,P20646,P20761,P20762,P20766,P30904,P38918,P46844,P48508,P51907,P53790,P54921,Q05175,Q3MIE4,Q3ZAV1,Q5I0E9,Q5M7T9,Q5RK11,Q62753,Q63270,Q63355,Q63424,Q63618,Q64093,Q6MG61,Q6PCU2,Q6Q0N1,Q6TMA8,Q80W57,Q8CIZ5,Q8R431,Q923S2,Q9JJ19,Q9WTW7,Q9WUW8,Q9Z0V6,Q9Z0W7                                                                                            |
| 6305 | 1,6,9,11,1<br>2,13,15,16 | 2,3,4,5,7,8<br>,10,14 | 26 | B0LT89,D4A5U3,O70417,O70594,P08937,P20646,P20760,P20761,P20762,P25809,P46844,P48508,P54921,Q05175,Q4G075,Q5QE79,Q5RLM2,Q62753,Q63355,Q63618,Q63751,Q6TMA8,Q8CIZ5,Q923S2,Q9WUW8,Q9WUW9                                                                                                                                                                                                                                        |

|      |                               |                        |    |                                                                                                                                                                                |
|------|-------------------------------|------------------------|----|--------------------------------------------------------------------------------------------------------------------------------------------------------------------------------|
| 6306 | 1,6,9,11,1<br>2,14,15,16      | 2,3,4,5,7,8<br>10,13   | 25 | D4A5U3,O55004,O70257,O70594,P00774,P19468,P20761,P20762,P25809,P30904,P46844,P47967,P48508,Q3ZAV1,Q63355,Q63424,Q63618,Q64093,Q6MG61,Q6Q0N1,Q6TMA8,Q8CIZ5,Q8R431,Q9WUW8,Q9WUW9 |
| 6307 | 1,6,9,11,1<br>3,14,15,16      | 2,3,4,5,7,8<br>10,12   | 20 | B0LT89,P00774,P0DMW0,P0DMW1,P12368,P20761,P20762,P20766,P30904,P46844,P47967,P48508,P97840,Q5PQL7,Q5RLM2,Q63270,Q63618,Q6MG61,Q6Q0N1,Q6TMA8,Q8CIZ5                             |
| 6308 | 1,6,9,12,1<br>3,14,15,16      | 2,3,4,5,7,8<br>10,11   | 15 | D4A5U3,P00774,P06760,P20646,P20761,P20762,P20766,P22273,P30904,P47967,P70549,Q4G075,Q6B345,Q6TMA8,Q8CIZ5                                                                       |
| 6309 | 1,6,10,11,<br>12,13,14,1<br>5 | 2,3,4,5,7,8<br>9,16    | 11 | D4A5U3,P00774,P05539,P06760,P08649,P20646,P20760,P20761,P20762,Q6TMA8,Q8CIZ5                                                                                                   |
| 6310 | 1,6,10,11,<br>12,13,14,1<br>6 | 2,3,4,5,7,8<br>9,15    | 12 | D4A5U3,P00774,P06760,P08649,P20646,P20760,P20761,P35280,P36376,Q6TMA8,Q8CIZ5,Q9Z0V6                                                                                            |
| 6311 | 1,6,10,11,<br>12,13,15,1<br>6 | 2,3,4,5,7,8<br>9,14    | 14 | D3ZHA0,D4A5U3,O70417,P00774,P06760,P08649,P08937,P20646,P20760,P20761,Q5QE79,Q63751,Q6TMA8,Q8CIZ5                                                                              |
| 6312 | 1,6,10,11,<br>12,14,15,1<br>6 | 2,3,4,5,7,8<br>9,13    | 9  | D4A5U3,P00774,P06760,P20646,P20760,P20761,Q5QE79,Q6TMA8,Q8CIZ5                                                                                                                 |
| 6313 | 1,6,10,11,<br>13,14,15,1<br>6 | 2,3,4,5,7,8<br>9,12    | 9  | D4A5U3,P00774,P06760,P20646,P20760,P36376,Q5PQL7,Q6TMA8,Q8CIZ5                                                                                                                 |
| 6314 | 1,6,10,12,<br>13,14,15,1<br>6 | 2,3,4,5,7,8<br>9,11    | 18 | D4A5U3,P00774,P06760,P07150,P08649,P14668,P20646,P20760,P20761,P35280,P70549,P82471,Q4G075,Q6B345,Q6P6R2,Q6TMA8,Q8CIZ5,Q9QX74                                                  |
| 6315 | 1,6,11,12,<br>13,14,15,1<br>6 | 2,3,4,5,7,8<br>9,10    | 17 | D4A5U3,O70594,P00774,P06760,P20646,P20760,P20761,P20762,P20766,P70545,Q4FZU6,Q5QE79,Q63618,Q6P6R2,Q6TMA8,Q8CIZ5,Q9Z0V6                                                         |
| 6316 | 1,7,8,9,10,<br>11,12,13       | 2,3,4,5,6,1<br>4,15,16 | 3  | B0LT89,P35745,Q4KLZ6                                                                                                                                                           |
| 6317 | 1,7,8,9,10,<br>11,12,14       | 2,3,4,5,6,1<br>3,15,16 | 4  | P21674,P35745,Q5I0D7,Q812E4                                                                                                                                                    |
| 6318 | 1,7,8,9,10,<br>11,12,15       | 2,3,4,5,6,1<br>3,14,16 | 5  | P35745,P49134,P52590,Q4KLZ6,Q9WUW8                                                                                                                                             |
| 6319 | 1,7,8,9,10,<br>11,12,16       | 2,3,4,5,6,1<br>3,14,15 | 4  | P21674,P35745,P49134,Q812E4                                                                                                                                                    |
| 6320 | 1,7,8,9,10,<br>11,13,14       | 2,3,4,5,6,1<br>2,15,16 | 3  | B0LT89,Q5I0D7,Q812E4                                                                                                                                                           |
| 6321 | 1,7,8,9,10,<br>11,13,15       | 2,3,4,5,6,1<br>2,14,16 | 4  | B0LT89,P35745,P52590,Q4KLZ6                                                                                                                                                    |

|      |                                             |                                                           |
|------|---------------------------------------------|-----------------------------------------------------------|
| 6322 | 1,7,8,9,10, 2,3,4,5,6,1<br>11,13,16 2,14,15 | 2 P30120,Q812E4                                           |
| 6323 | 1,7,8,9,10, 2,3,4,5,6,1<br>11,14,15 2,13,16 | 2 P35745,Q5I0D7                                           |
| 6324 | 1,7,8,9,10, 2,3,4,5,6,1<br>11,14,16 2,13,15 | 2 P21674,Q812E4                                           |
| 6325 | 1,7,8,9,10, 2,3,4,5,6,1<br>11,15,16 2,13,14 | 2 P35745,P49134                                           |
| 6326 | 1,7,8,9,10, 2,3,4,5,6,1<br>12,13,14 1,15,16 | 5 P17988,P21674,P29315,P35745,Q4KLZ6                      |
| 6327 | 1,7,8,9,10, 2,3,4,5,6,1<br>12,13,15 1,14,16 | 4 P35745,P52590,P70549,Q4KLZ6                             |
| 6328 | 1,7,8,9,10, 2,3,4,5,6,1<br>12,13,16 1,14,15 | 3 P21674,P35745,Q4KLZ6                                    |
| 6329 | 1,7,8,9,10, 2,3,4,5,6,1<br>12,14,15 1,13,16 | 2 P35745,Q4KLZ6                                           |
| 6330 | 1,7,8,9,10, 2,3,4,5,6,1<br>12,14,16 1,13,15 | 2 P21674,P35745                                           |
| 6331 | 1,7,8,9,10, 2,3,4,5,6,1<br>12,15,16 1,13,14 | 3 P21674,P35745,Q4KLZ6                                    |
| 6332 | 1,7,8,9,10, 2,3,4,5,6,1<br>13,14,15 1,12,16 | 2 P35745,Q4KLZ6                                           |
| 6333 | 1,7,8,9,10, 2,3,4,5,6,1<br>13,14,16 1,12,15 | 1 P21674                                                  |
| 6334 | 1,7,8,9,10, 2,3,4,5,6,1<br>13,15,16 1,12,14 | 2 P35745,Q4KLZ6                                           |
| 6335 | 1,7,8,9,10, 2,3,4,5,6,1<br>14,15,16 1,12,13 | 2 P35745,P47967                                           |
| 6336 | 1,7,8,9,11, 2,3,4,5,6,1<br>12,13,14 0,15,16 | 8 B0LT89,O70594,P17988,P21674,P53790,Q63270,Q71MB6,Q812E4 |
| 6337 | 1,7,8,9,11, 2,3,4,5,6,1<br>12,13,15 0,14,16 | 4 B0LT89,P35745,Q4KLZ6,Q71MB6                             |
| 6338 | 1,7,8,9,11, 2,3,4,5,6,1<br>12,13,16 0,14,15 | 7 B0LT89,P02782,P21674,P30120,P54921,Q63357,Q812E4        |
| 6339 | 1,7,8,9,11, 2,3,4,5,6,1<br>12,14,15 0,13,16 | 2 P35745,Q812E4                                           |
| 6340 | 1,7,8,9,11, 2,3,4,5,6,1<br>12,14,16 0,13,15 | 4 P21674,Q498D9,Q63618,Q812E4                             |
| 6341 | 1,7,8,9,11, 2,3,4,5,6,1<br>12,15,16 0,13,14 | 4 P35745,Q812E4,Q9QW07,Q9WUW8                             |

|      |                                             |                                                    |
|------|---------------------------------------------|----------------------------------------------------|
| 6342 | 1,7,8,9,11, 2,3,4,5,6,1<br>13,14,15 0,12,16 | 3 P0DMW0;P0DMW1,P36970,Q812E4                      |
| 6343 | 1,7,8,9,11, 2,3,4,5,6,1<br>13,14,16 0,12,15 | 6 P09456,P0DMW0;P0DMW1,P21674,P30120,Q498D9,Q812E4 |
| 6344 | 1,7,8,9,11, 2,3,4,5,6,1<br>13,15,16 0,12,14 | 3 P30120,Q5RLM2,Q812E4                             |
| 6345 | 1,7,8,9,11, 2,3,4,5,6,1<br>14,15,16 0,12,13 | 2 Q812E4,Q8CJ52                                    |
| 6346 | 1,7,8,9,12, 2,3,4,5,6,1<br>13,14,15 0,11,16 | 3 P35745,P70549,Q4KLZ6                             |
| 6347 | 1,7,8,9,12, 2,3,4,5,6,1<br>13,14,16 0,11,15 | 1 P21674                                           |
| 6348 | 1,7,8,9,12, 2,3,4,5,6,1<br>13,15,16 0,11,14 | 2 P35745,Q4KLZ6                                    |
| 6349 | 1,7,8,9,12, 2,3,4,5,6,1<br>14,15,16 0,11,13 | 2 P21674,P35745                                    |
| 6350 | 1,7,8,9,13, 2,3,4,5,6,1<br>14,15,16 0,11,12 | 0                                                  |
| 6351 | 1,7,8,10,1 2,3,4,5,6,9<br>1,12,13,14 ,15,16 | 2 P23593,P29315                                    |
| 6352 | 1,7,8,10,1 2,3,4,5,6,9<br>1,12,13,15 ,14,16 | 4 P23593,P35745,P52590,Q4KLZ6                      |
| 6353 | 1,7,8,10,1 2,3,4,5,6,9<br>1,12,13,16 ,14,15 | 2 P02782,P30120                                    |
| 6354 | 1,7,8,10,1 2,3,4,5,6,9<br>1,12,14,15 ,13,16 | 1 P35745                                           |
| 6355 | 1,7,8,10,1 2,3,4,5,6,9<br>1,12,14,16 ,13,15 | 2 P21674,P30120                                    |
| 6356 | 1,7,8,10,1 2,3,4,5,6,9<br>1,12,15,16 ,13,14 | 1 Q9QW07                                           |
| 6357 | 1,7,8,10,1 2,3,4,5,6,9<br>1,13,14,15 ,12,16 | 0                                                  |
| 6358 | 1,7,8,10,1 2,3,4,5,6,9<br>1,13,14,16 ,12,15 | 2 P30120,P36376                                    |
| 6359 | 1,7,8,10,1 2,3,4,5,6,9<br>1,13,15,16 ,12,14 | 1 P30120                                           |
| 6360 | 1,7,8,10,1 2,3,4,5,6,9<br>1,14,15,16 ,12,13 | 0                                                  |
| 6361 | 1,7,8,10,1 2,3,4,5,6,9<br>2,13,14,15 ,11,16 | 3 P35745,P70549,Q4KLZ6                             |

|      |                                             |    |                                                                                                          |
|------|---------------------------------------------|----|----------------------------------------------------------------------------------------------------------|
| 6362 | 1,7,8,10,1 2,3,4,5,6,9<br>2,13,14,16 ,11,15 | 1  | P21674                                                                                                   |
| 6363 | 1,7,8,10,1 2,3,4,5,6,9<br>2,13,15,16 ,11,14 | 3  | P35745,P70549,Q4KLZ6                                                                                     |
| 6364 | 1,7,8,10,1 2,3,4,5,6,9<br>2,14,15,16 ,11,13 | 1  | P35745                                                                                                   |
| 6365 | 1,7,8,10,1 2,3,4,5,6,9<br>3,14,15,16 ,11,12 | 1  | P70549                                                                                                   |
| 6366 | 1,7,8,11,1 2,3,4,5,6,9<br>2,13,14,15 ,10,16 | 1  | Q811M5                                                                                                   |
| 6367 | 1,7,8,11,1 2,3,4,5,6,9<br>2,13,14,16 ,10,15 | 6  | P02782,P21674,P30120,Q811M5,Q812E4,Q99MH3                                                                |
| 6368 | 1,7,8,11,1 2,3,4,5,6,9<br>2,13,15,16 ,10,14 | 2  | P02782,P30120                                                                                            |
| 6369 | 1,7,8,11,1 2,3,4,5,6,9<br>2,14,15,16 ,10,13 | 4  | D3ZTX0,P17559,Q811M5,Q9QW07                                                                              |
| 6370 | 1,7,8,11,1 2,3,4,5,6,9<br>3,14,15,16 ,10,12 | 2  | P30120,Q811M5                                                                                            |
| 6371 | 1,7,8,12,1 2,3,4,5,6,9<br>3,14,15,16 ,10,11 | 2  | P70549,Q9Z2L0                                                                                            |
| 6372 | 1,7,9,10,1 2,3,4,5,6,8<br>1,12,13,14 ,15,16 | 13 | BOLT89,O70594,P00774,P17988,P20760,P20761,P20762,P48508,P53790,Q05702,Q5I0D7,Q62761;Q62762;Q62763,Q63270 |
| 6373 | 1,7,9,10,1 2,3,4,5,6,8<br>1,12,13,15 ,14,16 | 10 | BOLT89,P08937,P20760,P20761,P20762,P52590,Q4KLZ6,Q62761;Q62762;Q62763,Q6TMA8,Q9WUW8                      |
| 6374 | 1,7,9,10,1 2,3,4,5,6,8<br>1,12,13,16 ,14,15 | 7  | BOLT89,P20760,P20761,P20762,P21674,P54921,Q8CIZ5                                                         |
| 6375 | 1,7,9,10,1 2,3,4,5,6,8<br>1,12,14,15 ,13,16 | 8  | P00774,P20760,P20761,P46844,Q5I0D7,Q62761;Q62762;Q62763,Q8CIZ5,Q9WUW8                                    |
| 6376 | 1,7,9,10,1 2,3,4,5,6,8<br>1,12,14,16 ,13,15 | 9  | O70594,P00774,P10247,P20761,P21674,Q498D9,Q63618,Q8CGS4,Q8CIZ5                                           |
| 6377 | 1,7,9,10,1 2,3,4,5,6,8<br>1,12,15,16 ,13,14 | 7  | D4A5U3,P08937,P20760,P20761,P52590,Q8CIZ5,Q9WUW8                                                         |
| 6378 | 1,7,9,10,1 2,3,4,5,6,8<br>1,13,14,15 ,12,16 | 7  | BOLT89,P00774,P0DMW0;P0DMW1,P20760,P20761,Q05702,Q5I0D7                                                  |
| 6379 | 1,7,9,10,1 2,3,4,5,6,8<br>1,13,14,16 ,12,15 | 8  | P00774,P10247,P36376,P98089,Q05702,Q498D9,Q8CIZ5,Q9R168                                                  |
| 6380 | 1,7,9,10,1 2,3,4,5,6,8<br>1,13,15,16 ,12,14 | 5  | P08937,P20760,Q05702,Q5RLM2,Q8CIZ5                                                                       |
| 6381 | 1,7,9,10,1 2,3,4,5,6,8<br>1,14,15,16 ,12,13 | 6  | P00774,P10247,P98089,Q05702,Q8CIZ5,Q9R168                                                                |

|      |                          |                       |    |                                                                                                                                                                                                                                                                                                |
|------|--------------------------|-----------------------|----|------------------------------------------------------------------------------------------------------------------------------------------------------------------------------------------------------------------------------------------------------------------------------------------------|
| 6382 | 1,7,9,10,1<br>2,13,14,15 | 2,3,4,5,6,8<br>,11,16 | 11 | P00762,P00774,P02780,P20760,P20761,P22273,P35745,P50280,P70549,Q05702,Q4KLZ6                                                                                                                                                                                                                   |
| 6383 | 1,7,9,10,1<br>2,13,14,16 | 2,3,4,5,6,8<br>,11,15 | 10 | P00774,P10247,P21674,P50280,Q10758,Q6IFU7,Q6IFU8,Q6IFW6,Q6IG02,Q8CIZ5                                                                                                                                                                                                                          |
| 6384 | 1,7,9,10,1<br>2,13,15,16 | 2,3,4,5,6,8<br>,11,14 | 8  | P00774,P08937,P20760,P35745,P50280,Q4KLZ6,Q63751,Q8CIZ5                                                                                                                                                                                                                                        |
| 6385 | 1,7,9,10,1<br>2,14,15,16 | 2,3,4,5,6,8<br>,11,13 | 5  | P00774,P10247,P22273,P35745,Q8CIZ5                                                                                                                                                                                                                                                             |
| 6386 | 1,7,9,10,1<br>3,14,15,16 | 2,3,4,5,6,8<br>,11,12 | 6  | P00774,P10247,P31430,Q05702,Q5PQL7,Q8CIZ5                                                                                                                                                                                                                                                      |
| 6387 | 1,7,9,11,1<br>2,13,14,15 | 2,3,4,5,6,8<br>,10,16 | 38 | B0LT89,O55004,O70257,O70377,O70594,P00774,P07151,P0DMW0,P0DMW1,P19468,P20760,P20761,P20762,P25031,P28570,P36970,P46844,P48508,P53790,Q03248,Q05175,Q05702,Q3T1J9,Q3ZAV1,Q5BJY9,Q5I0D7,Q5I0E9,Q5M7T9,Q62761,Q62762,Q62763,Q63270,Q63424,Q63618,Q6MG61,Q6Q0N1,Q71MB6,Q8R431,Q923S2,Q9WUW8,Q9Z0W7 |
| 6388 | 1,7,9,11,1<br>2,13,14,16 | 2,3,4,5,6,8<br>,10,15 | 26 | B0LT89,O70377,O70594,O88339;Q4V882,P10247,P20760,P20761,P20762,P21674,P25031,P30904,P38918,P48508,P53790,P54921,Q05175,Q05702,Q498D9,Q5I0E9,Q62753,Q63270,Q63618,Q6MG61,Q6Q0N1,Q8CIZ5,Q923S2                                                                                                   |
| 6389 | 1,7,9,11,1<br>2,13,15,16 | 2,3,4,5,6,8<br>,10,14 | 14 | O70594,O88339;Q4V882,P08937,P20760,P20761,P20762,P25031,P48508,P54921,Q5RLM2,Q63618,Q8CIZ5,Q923S2,Q9WUW8                                                                                                                                                                                       |
| 6390 | 1,7,9,11,1<br>2,14,15,16 | 2,3,4,5,6,8<br>,10,13 | 19 | O55004,O70257,O70594,O88339;Q4V882,P00774,P02631,P10247,P20760,P20761,P25031,P25809,P30904,P36860,P46844,Q05702,Q498D9,Q63618,Q8CIZ5,Q9WUW8                                                                                                                                                    |
| 6391 | 1,7,9,11,1<br>3,14,15,16 | 2,3,4,5,6,8<br>,10,12 | 14 | P00774,P02631,P0DMW0,P0DMW1,P10247,P20760,P25031,P30904,P48508,Q05702,Q498D9,Q5RLM2,Q63618,Q8CIZ5,Q9R168                                                                                                                                                                                       |
| 6392 | 1,7,9,12,1<br>3,14,15,16 | 2,3,4,5,6,8<br>,10,11 | 9  | P00774,P08937,P10247,P20760,P25031,Q05702,Q5BJY9,Q6B345,Q8CIZ5                                                                                                                                                                                                                                 |
| 6393 | 1,7,10,11,<br>12,13,14,1 | 2,3,4,5,6,8<br>,9,16  | 5  | P00774,P20760,P20761,P23593,Q05702                                                                                                                                                                                                                                                             |
| 6394 | 1,7,10,11,<br>12,13,14,1 | 2,3,4,5,6,8<br>,9,15  | 5  | P00774,P10247,P20760,P36376,Q05702                                                                                                                                                                                                                                                             |
| 6395 | 1,7,10,11,<br>12,13,15,1 | 2,3,4,5,6,8<br>,9,14  | 8  | D4A5U3,P00774,P08937,P20760,P52590,Q05702,Q63751,Q8CIZ5                                                                                                                                                                                                                                        |
| 6396 | 1,7,10,11,<br>12,14,15,1 | 2,3,4,5,6,8<br>,9,13  | 7  | D4A5U3,P00774,P10247,P17559,P20760,Q05702,Q8CIZ5                                                                                                                                                                                                                                               |
| 6397 | 1,7,10,11,<br>13,14,15,1 | 2,3,4,5,6,8<br>,9,12  | 5  | P00774,P20760,P36376,Q05702,Q8CIZ5                                                                                                                                                                                                                                                             |

|      |                               |                       |    |                                                                                                                                                                                                                                                                                                                                                 |
|------|-------------------------------|-----------------------|----|-------------------------------------------------------------------------------------------------------------------------------------------------------------------------------------------------------------------------------------------------------------------------------------------------------------------------------------------------|
| 6398 | 1,7,10,12,<br>13,14,15,1<br>6 | 2,3,4,5,6,8<br>,9,11  | 7  | P00774,P08937,P20760,P70549,Q05702,Q6P6S4,Q8CIZ5                                                                                                                                                                                                                                                                                                |
| 6399 | 1,7,11,12,<br>13,14,15,1<br>6 | 2,3,4,5,6,8<br>,9,10  | 14 | D3ZTX0,O70594,P00774,P02454,P08937,P10247,P17559,P20760,P25031,P70545,Q05702,Q63618,Q811M5,Q8CIZ5                                                                                                                                                                                                                                               |
| 6400 | 1,8,9,10,1<br>1,12,13,14      | 2,3,4,5,6,7<br>,15,16 | 15 | BOLT89,O70594,P17988,P18297,P19468,P46844,P48508,P50116,P53790,Q03248,Q5I0D7,Q5I0E9,Q63270,Q6TMA8,Q71MB6                                                                                                                                                                                                                                        |
| 6401 | 1,8,9,10,1<br>1,12,13,15      | 2,3,4,5,6,7<br>,14,16 | 13 | BOLT89,P35745,P36970,P48037,P50116,P52590,Q4KLZ6,Q5I0D7,Q5QE79,Q5RLM2,Q6TMA8,Q71MB6,Q9WUW8                                                                                                                                                                                                                                                      |
| 6402 | 1,8,9,10,1<br>1,12,13,16      | 2,3,4,5,6,7<br>,14,15 | 4  | BOLT89,P21674,P50116,Q62714                                                                                                                                                                                                                                                                                                                     |
| 6403 | 1,8,9,10,1<br>1,12,14,15      | 2,3,4,5,6,7<br>,13,16 | 9  | BOLT89,O70594,P35745,P46844,P50116,P80299,Q5I0D7,Q6TMA8,Q9WUW8                                                                                                                                                                                                                                                                                  |
| 6404 | 1,8,9,10,1<br>1,12,14,16      | 2,3,4,5,6,7<br>,13,15 | 8  | BOLT89,O70594,P21674,P36860,P50116,P80299,Q5I0D7,Q62714                                                                                                                                                                                                                                                                                         |
| 6405 | 1,8,9,10,1<br>1,12,15,16      | 2,3,4,5,6,7<br>,13,14 | 6  | BOLT89,P50116,P52590,P80299,Q5QE79,Q9WUW8                                                                                                                                                                                                                                                                                                       |
| 6406 | 1,8,9,10,1<br>1,13,14,15      | 2,3,4,5,6,7<br>,12,16 | 5  | BOLT89,P36970,P50116,Q5I0D7,Q6TMA8                                                                                                                                                                                                                                                                                                              |
| 6407 | 1,8,9,10,1<br>1,13,14,16      | 2,3,4,5,6,7<br>,12,15 | 3  | BOLT89,O89117,P50116                                                                                                                                                                                                                                                                                                                            |
| 6408 | 1,8,9,10,1<br>1,13,15,16      | 2,3,4,5,6,7<br>,12,14 | 5  | BOLT89,P50116,Q5QE79,Q5RLM2,Q80WL1                                                                                                                                                                                                                                                                                                              |
| 6409 | 1,8,9,10,1<br>1,14,15,16      | 2,3,4,5,6,7<br>,12,13 | 6  | P36860,P47967,P50116,P80299,P97840,Q5I0D7                                                                                                                                                                                                                                                                                                       |
| 6410 | 1,8,9,10,1<br>2,13,14,15      | 2,3,4,5,6,7<br>,11,16 | 13 | P01039,P02780,P07647,P11598,P17988,P35745,P50116,P70549,Q4KLZ6,Q5I0D7,Q6TMA8,Q8R5M3,Q9ROT3                                                                                                                                                                                                                                                      |
| 6411 | 1,8,9,10,1<br>2,13,14,16      | 2,3,4,5,6,7<br>,11,15 | 5  | O08557,P01039,P17988,P21674,P50116                                                                                                                                                                                                                                                                                                              |
| 6412 | 1,8,9,10,1<br>2,13,15,16      | 2,3,4,5,6,7<br>,11,14 | 8  | P01039,P08649,P35745,P50116,P52590,Q4KLZ6,Q5QE79,Q63751                                                                                                                                                                                                                                                                                         |
| 6413 | 1,8,9,10,1<br>2,14,15,16      | 2,3,4,5,6,7<br>,11,13 | 6  | P01039,P35745,P47967,P50116,P80299,Q9ROT3                                                                                                                                                                                                                                                                                                       |
| 6414 | 1,8,9,10,1<br>3,14,15,16      | 2,3,4,5,6,7<br>,11,12 | 7  | P01039,P47967,P50116,P70709,P97840,Q5I0D1,Q9ROT3                                                                                                                                                                                                                                                                                                |
| 6415 | 1,8,9,11,1<br>2,13,14,15      | 2,3,4,5,6,7<br>,10,16 | 47 | BOLT89,O08557,O70594,P0DMW0,P0DMW1,P17988,P18297,P18757,P19468,P20766,P28570,P29975,P36970,P38918,P46844,P48037,P48508,P50116,P52847,P53790,P57113,P80299,Q03248,Q3T1J9,Q3ZAV1,Q5I0D7,Q5I0E9,Q5M7T9,Q5RLM2,Q63270,Q63424,Q63618,Q64602,Q68FT5,Q6MG61,Q6Q0N1,Q6TMA8,Q71MB6,Q80W57,Q8R431,Q8VI04,Q923S2,Q9JJ40,Q9QYU4,Q9WTW7,Q9WUW8,Q9WUW9,Q9Z0W7 |



|      |                               |                       |    |                                                                                                                                                                                                                                                                                                                                                                                                                                                                                                                                                                   |
|------|-------------------------------|-----------------------|----|-------------------------------------------------------------------------------------------------------------------------------------------------------------------------------------------------------------------------------------------------------------------------------------------------------------------------------------------------------------------------------------------------------------------------------------------------------------------------------------------------------------------------------------------------------------------|
| 6416 | 1,8,9,11,1<br>2,13,14,16      | 2,3,4,5,6,7<br>,10,15 | 37 | A2RUW1,B0LT89,O08557,O70594,O88339;Q4V882,P17988,P18297,P19468,P20766,P21674,P30904,P36860,P38918,P46844,P48508,P50116,P53790,P54921,P80299,Q03248,Q05175,Q3MIE4,Q5I0E9,Q5M7T9,Q5RKI1,Q63270,Q63357,Q63424,Q63618,Q6MG61,Q6Q0N1,Q71MB6,Q7M0E3,Q812E4,Q8K3P7,Q923S2,Q9Z0W7                                                                                                                                                                                                                                                                                         |
| 6417 | 1,8,9,11,1<br>2,13,15,16      | 2,3,4,5,6,7<br>,10,14 | 17 | A2RUW1,B0LT89,O70594,P18297,P48037,P48508,P50116,P54921,P57113,P80299,Q5I0E9,Q5QE79,Q5RLM2,Q71MB6,Q80WL1,Q923S2,Q9WUW8                                                                                                                                                                                                                                                                                                                                                                                                                                            |
| 6418 | 1,8,9,11,1<br>2,14,15,16      | 2,3,4,5,6,7<br>,10,13 | 10 | A2RUW1,O70594,P18297,P36860,P46844,P48508,P50116,P80299,Q63618,Q9WUW8                                                                                                                                                                                                                                                                                                                                                                                                                                                                                             |
| 6419 | 1,8,9,11,1<br>3,14,15,16      | 2,3,4,5,6,7<br>,10,12 | 15 | B0LT89,P0DMW0;P0DMW1,P18297,P30904,P36860,P36970,P46844,P47967,P48508,P50116,P80299,Q5RLM2,Q63270,Q63618,Q66HG3                                                                                                                                                                                                                                                                                                                                                                                                                                                   |
| 6420 | 1,8,9,12,1<br>3,14,15,16      | 2,3,4,5,6,7<br>,10,11 | 8  | O08557,P01039,P20766,P48037,P50116,P80299,Q6B345,Q9R0T3                                                                                                                                                                                                                                                                                                                                                                                                                                                                                                           |
| 6421 | 1,8,10,11,<br>12,13,14,1<br>5 | 2,3,4,5,6,7<br>,9,16  | 1  | P50116                                                                                                                                                                                                                                                                                                                                                                                                                                                                                                                                                            |
| 6422 | 1,8,10,11,<br>12,13,14,1<br>6 | 2,3,4,5,6,7<br>,9,15  | 1  | P50116                                                                                                                                                                                                                                                                                                                                                                                                                                                                                                                                                            |
| 6423 | 1,8,10,11,<br>12,13,15,1<br>6 | 2,3,4,5,6,7<br>,9,14  | 4  | P50116,P52590,Q5QE79,Q63751                                                                                                                                                                                                                                                                                                                                                                                                                                                                                                                                       |
| 6424 | 1,8,10,11,<br>12,14,15,1<br>6 | 2,3,4,5,6,7<br>,9,13  | 4  | P36860,P50116,P80299,Q5QE79                                                                                                                                                                                                                                                                                                                                                                                                                                                                                                                                       |
| 6425 | 1,8,10,11,<br>13,14,15,1<br>6 | 2,3,4,5,6,7<br>,9,12  | 3  | P50116,P80299,Q5QE79                                                                                                                                                                                                                                                                                                                                                                                                                                                                                                                                              |
| 6426 | 1,8,10,12,<br>13,14,15,1<br>6 | 2,3,4,5,6,7<br>,9,11  | 6  | P00774,P01039,P50116,P70549,Q5QE79,Q9R0T3                                                                                                                                                                                                                                                                                                                                                                                                                                                                                                                         |
| 6427 | 1,8,11,12,<br>13,14,15,1<br>6 | 2,3,4,5,6,7<br>,9,10  | 11 | D3ZTX0,O70594,P20766,P36860,P50116,P70545,P80299,Q5QE79,Q63618,Q811M5,Q9WVH8                                                                                                                                                                                                                                                                                                                                                                                                                                                                                      |
| 6428 | 1,9,10,11,<br>12,13,14,1<br>5 | 2,3,4,5,6,7<br>,8,16  | 76 | B0LT89,D3ZHA0,D4A5U3,O55004,O70257,O70594,P00774,P01836,P02631,P02780,P02781,P04904,P06761,P07151,P08649,P08937,P18757,P19223,P19468,P20646,P20673,P20760,P20761,P20762,P28570,P36970,P38438,P38918,P46720,P46844,P48037,P48508,P50115,P50116,P50280,P52847,P53790,P55091,P57113,P98089,Q03248,Q05175,Q05702,Q3ZAV1,Q4G075,Q5I0D7,Q5I0E9,Q5M7T9,Q5M8C6,Q5QE79,Q5RLM2,Q5U2Q3,Q62761;Q62762;Q62763,Q63270,Q63317,Q63424,Q63618,Q64602,Q6MG61,Q6PCU2,Q6Q0N1,Q6TMA8,Q71MB6,Q8CIZ5,Q8R431,Q8R5M3,Q923S2,Q9JJ40,Q9JLJ3,Q9QX74,Q9QYU4,Q9R0T3,Q9WTW7,Q9WUW8,Q9WUW9,Q9Z0W7 |

|      |                                |                      |    |                                                                                                                                                                                                                                                                                                                                                                                                                                                                                                                                                                                                                                                                                                                      |
|------|--------------------------------|----------------------|----|----------------------------------------------------------------------------------------------------------------------------------------------------------------------------------------------------------------------------------------------------------------------------------------------------------------------------------------------------------------------------------------------------------------------------------------------------------------------------------------------------------------------------------------------------------------------------------------------------------------------------------------------------------------------------------------------------------------------|
| 6429 | 1,9,10,11,<br>12,13,14,1<br>6  | 2,3,4,5,6,7<br>,8,15 | 54 | B0LT89,D3ZHA0,D4A5U3,O08557,O35763,O55004,O70377,O70594,O88339;Q4V882,P00774,P01836,P08937,P10247,P17988,P19468,P20646,P20760,P20761,P20762,P30904,P36860,P38918,P46844,P48508,P50115,P50116,P50280,P53790,P55091,P98089,Q05175,Q05702,Q498D9,Q4G075,Q5I0D7,Q5I0E9,Q5M7T9,Q5QE79,Q62714,Q63270,Q63618,Q6AYS7,Q6MG61,Q6PCU2,Q6Q0N1,Q6TMA8,Q8CGS4,Q8CIZ5,Q923S2,Q9QX74,Q9R0T3,Q9WUW8,Q9Z0V6,Q9Z0W7                                                                                                                                                                                                                                                                                                                     |
| 6430 | 1,9,10,11,<br>12,13,15,1<br>6  | 2,3,4,5,6,7<br>,8,14 | 37 | B0LT89,D3ZHA0,D4A5U3,O70417,O70594,P00774,P06760,P06761,P08649,P08937,P19223,P20760,P20761,P20762,P46844,P48037,P48508,P50115,P50116,P52590,P55091,P63081,P98089,Q4G075,Q5QE79,Q5RLM2,Q62635,Q62714,Q63751,Q6PCU2,Q6TMA8,Q8CIZ5,Q923S2,Q9QX74,Q9R0T3,Q9WUW8,Q9WUW9                                                                                                                                                                                                                                                                                                                                                                                                                                                   |
| 6431 | 1,9,10,11,<br>12,14,15,1<br>6  | 2,3,4,5,6,7<br>,8,13 | 44 | B0LT89,D3ZHA0,D4A5U3,O55004,O70257,O70594,P00774,P01836,P02631,P06761,P07171,P08937,P10247,P19223,P20760,P20761,P20762,P22734,P25809,P30904,P36860,P46844,P48508,P50115,P50116,P55091,P63081,P80299,P98089,Q05702,Q4G075,Q5I0D7,Q5M7T9,Q5QE79,Q62714,Q62946,Q63618,Q6PCU2,Q6Q0N1,Q6TMA8,Q8CIZ5,Q9QX74,Q9R0T3,Q9WUW8                                                                                                                                                                                                                                                                                                                                                                                                  |
| 6432 | 1,9,10,11,<br>13,14,15,1<br>6  | 2,3,4,5,6,7<br>,8,12 | 35 | B0LT89,D3ZHA0,D4A5U3,P00774,P01836,P02631,P06761,P08937,P10247,P20760,P20761,P20762,P26772,P30904,P31430,P38438,P46844,P48508,P50115,P50116,P55091,P98089,Q05702,Q4G075,Q5I0D7,Q5QE79,Q5RLM2,Q62946,Q63270,Q6Q0N1,Q6TMA8,Q8CIZ5,Q920G2,Q9QX74,Q9R0T3                                                                                                                                                                                                                                                                                                                                                                                                                                                                 |
| 6433 | 1,9,10,12,<br>13,14,15,1<br>6  | 2,3,4,5,6,7<br>,8,11 | 46 | D3ZHA0,D4A5U3,O08557,P00774,P01039,P02780,P02781,P06760,P06761,P07150,P08649,P08937,P10247,P11598,P12020,P20760,P20761,P20762,P22273,P22282,P22283,P30904,P31430,P46462,P50115,P50116,P50280,P55091,P98089,Q05702,Q4G063,Q4G075,Q5M8C6,Q5QE79,Q5U2V4,Q62902,Q62946,Q63493,Q63617,Q6B345,Q6TMA8,Q8CIZ5,Q99041,Q9QX74,Q9R0T3,Q9WTT6                                                                                                                                                                                                                                                                                                                                                                                    |
| 6434 | 1,9,11,12,<br>13,14,15,1<br>6  | 2,3,4,5,6,7<br>,8,10 | 94 | B0LT89,D3ZHA0,D4A5U3,O08557,O35763,O55004,O70257,O70377,O70594,O88339;Q4V882,P00774,P01836,P02454,P02631,P04904,P06761,P08937,P10247,P10760,P18757,P19223,P19468,P20646,P20760,P20761,P20762,P20766,P23928,P25031,P25809,P26772,P29975,P30904,P36860,P36970,P38438,P38918,P46720,P46844,P48037,P48508,P50115,P50116,P51907,P52847,P53790,P54921,P55091,P57113,P60711;P63259,P68035;P68136,P80299,P98089,Q03248,Q05175,Q05702,Q3MIE4,Q3T1J9,Q3ZAV1,Q4G075,Q5I0E9,Q5M7T9,Q5QE79,Q5RLM2,Q62753,Q62761;Q62762;Q62763,Q63270,Q63317,Q63355,Q63424,Q63618,Q64602,Q66HG3,Q6AYS7,Q6MG61,Q6PCU2,Q6Q0N1,Q6TMA8,Q71MB6,Q80W57,Q8CIZ5,Q8R431,Q920G2,Q923S2,Q9JJ19,Q9JJ40,Q9JLJ3,Q9QX74,Q9QYU4,Q9R0T3,Q9WTW7,Q9WUW8,Q9WUW9,Q9Z0W7 |
| 6435 | 1,10,11,12,<br>13,14,15,<br>16 | 2,3,4,5,6,7<br>,8,9  | 31 | D3ZHA0,D4A5U3,O70594,P00774,P01836,P06760,P08937,P10247,P19223,P20646,P20760,P20761,P20762,P26772,P50115,P50116,P55091,P98089,Q05702,Q4FZU6,Q4G075,Q5QE79,Q5U2V4,Q62946,Q6P6R2,Q6TMA8,Q8CIZ5,Q920G2,Q9QX74,Q9R0T3,Q9Z0V6                                                                                                                                                                                                                                                                                                                                                                                                                                                                                             |

#### Day 7

| Random allocation | Group1 | Group2 | Numbers of differential urinary proteins | Differential protein ID |
|-------------------|--------|--------|------------------------------------------|-------------------------|
|-------------------|--------|--------|------------------------------------------|-------------------------|

|    |                     |                            |
|----|---------------------|----------------------------|
| 1  | 1,2,3,4,5,6<br>7,8  | 17,18,19,20<br>21,22,23,24 |
| 2  | 1,2,3,4,5,6<br>7,17 | 8,18,19,20<br>21,22,23,24  |
| 3  | 1,2,3,4,5,6<br>7,18 | 8,17,19,20<br>21,22,23,24  |
| 4  | 1,2,3,4,5,6<br>7,19 | 8,17,18,20<br>21,22,23,24  |
| 5  | 1,2,3,4,5,6<br>7,20 | 8,17,18,19<br>21,22,23,24  |
| 6  | 1,2,3,4,5,6<br>7,21 | 8,17,18,19<br>20,22,23,24  |
| 7  | 1,2,3,4,5,6<br>7,22 | 8,17,18,19<br>20,21,23,24  |
| 8  | 1,2,3,4,5,6<br>7,23 | 8,17,18,19<br>20,21,22,24  |
| 9  | 1,2,3,4,5,6<br>7,24 | 8,17,18,19<br>20,21,22,23  |
| 10 | 1,2,3,4,5,6<br>8,17 | 7,18,19,20<br>21,22,23,24  |
| 11 | 1,2,3,4,5,6<br>8,18 | 7,17,19,20<br>21,22,23,24  |
| 12 | 1,2,3,4,5,6<br>8,19 | 7,17,18,20<br>21,22,23,24  |

B1H234,D3ZHA0,iRT-Kit\_WR\_fusion,O54858,O70594,P01681,P01836,P11762,P15399,P18418,P18757,P19629,P20760,P20761,P23593,P30919,P31044,P33436,P36860,P42854,P46844,P48508,P50115,P50116,P50280,P52590,P80202,P80299,P97580,Q05702,Q09030,Q30KJ2,Q4AEF8,Q4FZU2,Q4FZU4,Q4KLZ6,Q5BK81,Q5I0E9,Q62946,Q64240,Q6IFU7,Q6IFU8,Q6IFW6,Q6IG02,Q6IG05,Q6IMF3,Q6P6Q2,Q91XN4,Q91ZS3,Q99041,Q9QZQ5,Q9Z2L0

52 B1H234,O70594,P11762,P23593,P33436,P36860,P42854,P50116,P52590,P80299,Q09030,Q4AEF8,Q4KLZ6,Q99PP0,Q9Z2L0

15 B1H234,O54800;Q5DWV2,O70594,P11762,P23593,P33436,P36860,P42854,P50116,P52590,P80299,Q03191,Q09030,Q4AEF8,Q4KLZ6,Q5I0E9,Q6P6R2,Q91XN4,Q91ZS3,Q9QZQ5,Q9Z2L0

21 B1H234,O70594,P11762,P42854,P47967,P50116,P52590,P80299,Q09030,Q4AEF8,Q4FZU4,Q4KLZ6,Q9Z2L0

13 B1H234,P0DP29;P0DP30;P0DP31,P11598,P11762,P19629,P23593,P33436,P42854,P47967,P50116,P52590,P80299,Q03191,Q09030,Q4AEF8,Q4KLZ6,Q5GRG2,Q5I0D1,Q6IG02,Q91ZS3,Q9Z2L0

21 B1H234,O70594,P04762,P11762,P30919,P36860,P42854,P47967,P48037,P50116,P52590,P70549,P80299,Q03191,Q09030,Q4AEF8,Q4KLZ6

17 B1H234,P11762,P23593,P30919,P42854,P50116,P52590,P80299,Q03191,Q09030,Q4FZU4,Q4KLZ6,Q6P6R2,Q91XN4,Q9Z2L0

15 B0LT89,B1H234,O70594,P02783,P09656,P11762,P23593,P30120,P36860,P42854,P46844,P47727,P50116,P52590,P80299,Q03191,Q09030,Q4KLZ6,Q63532,Q6P6R2,Q91XN4,Q99MH3,Q9JJ50,Q9Z2L0

24 B1H234,O08557,O70594,P02761,P11762,P23593,P30919,P36860,P42854,P46844,P50116,P52590,P80299,Q09030,Q4KLZ6,Q6AY61,Q6P6R2,Q91XN4,Q9Z2L0

19 O70594,P01681,P11762,P15399,P18418,P23593,P33436,P42854,P52590,P97580,Q05702,Q09030,Q30KJ2,Q4FZU2,Q4KLZ6,Q5BK81,Q64240,Q6IFU7,Q6IFU8,Q6IFW6,Q6IG02,Q6IG05,Q6IMF3,Q6P6Q2,Q91XN4,Q99PP0,Q9QZQ5,Q9Z2L0

28 O54800;Q5DWV2,O70594,P01681,P11762,P15399,P18418,P20762,P23593,P33436,P42854,P52590,P97580,Q05702,Q09030,Q30KJ2,Q4FZU2,Q4KLZ6,Q5BK81,Q64240,Q6IFU7,Q6IG02,Q6IG05,Q6IMF3,Q6P6Q2,Q91XN4,Q91ZS3,Q9QZQ5,Q9Z2L0

28 O70594,P01681,P11762,P15399,P18418,P30919,P42854,P52590,P97580,Q05702,Q09030,Q10743,Q30KJ2,Q4FZU2,Q4KLZ6,Q6IFU7,Q6IFW6,Q6IG02,Q6IG05,Q6IMF3,Q6P6Q2,Q9QZQ5,Q9Z2L0

23 0

13 1,2,3,4,5,6 7,17,18,19  
,8,20 ,21,22,23,  
24

14 1,2,3,4,5,6 7,17,18,19  
,8,21 ,20,22,23,  
24

15 1,2,3,4,5,6 7,17,18,19  
,8,22 ,20,21,23,  
24

16 1,2,3,4,5,6 7,17,18,19  
,8,23 ,20,21,22,  
24

17 1,2,3,4,5,6 7,17,18,19  
,8,24 ,20,21,22,  
23

18 1,2,3,4,5,6 7,8,19,20,  
,17,18 21,22,23,2  
4

19 1,2,3,4,5,6 7,8,18,20,  
,17,19 21,22,23,2  
4

20 1,2,3,4,5,6 7,8,18,19,  
,17,20 21,22,23,2  
4

21 1,2,3,4,5,6 7,8,18,19,  
,17,21 20,22,23,2  
4

22 1,2,3,4,5,6 7,8,18,19,  
,17,22 20,21,23,2  
4

23 1,2,3,4,5,6 7,8,18,19,  
,17,23 20,21,22,2  
4

24 1,2,3,4,5,6 7,8,18,19,  
,17,24 20,21,22,2  
3

25 1,2,3,4,5,6 7,8,17,20,  
,18,19 21,22,23,2  
4

37 D4A5U3,P01681,P06911,P11762,P12020,P15399,P17559,P18418,P19629,P23593,P25031,P3343  
6,P36375,P42854,P50280,P52590,P97580,Q05702,Q09030,Q10743,Q10758,Q30KJ2,Q4FZU2,Q4  
KLZ6,Q5GRG2,Q6IFU7,Q6IFU8,Q6IFW6,Q6IG02,Q6IG05,Q6IMF3,Q6P6Q2,Q91XN4,Q91ZS3,Q9J  
85,Q9QZQ5,Q9Z2L0

32 B1H234,O70594,P01681,P02625,P11762,P18418,P23593,P30919,P36860,P42854,P52590,P7054  
9,P97580,Q05702,Q09030,Q10743,Q30KJ2,Q4FZU2,Q4KLZ6,Q5BK81,Q6AYC4,Q6IFU7,Q6IFU8,  
Q6IFW6,Q6IG02,Q6IG05,Q6IMF3,Q6P6Q2,Q91XN4,Q91ZS3,Q9QZQ5,Q9Z2L0

27 P00507,P01681,P11762,P15399,P20760,P23593,P30919,P42854,P52590,P80202,P97580,Q0570  
2,Q09030,Q10743,Q30KJ2,Q4FZU2,Q4KLZ6,Q6IFU7,Q6IFW6,Q6IG02,Q6IG05,Q6IMF3,Q6P6Q2,  
Q6P6R2,Q91XN4,Q9QZQ5,Q9Z2L0

34 O70594,P01681,P02783,P09656,P11762,P20760,P20761,P23593,P23785,P30919,P36376,P4285  
4,P52590,P80202,P97580,Q05702,Q09030,Q30KJ2,Q4FZU2,Q4KLZ6,Q5BK81,Q63532,Q6IFU7,Q  
6IFU8,Q6IFW6,Q6IG02,Q6IG05,Q6IMF3,Q6P6Q2,Q6P6R2,Q91XN4,Q99MH3,Q9JJ50,Q9Z2L0

30 O70594,P01681,P11762,P15399,P18418,P20760,P23593,P30919,P36860,P42854,P52590,P9758  
0,Q05702,Q09030,Q10743,Q30KJ2,Q4FZU2,Q4KLZ6,Q6IFU7,Q6IFU8,Q6IFW6,Q6IG02,Q6IG05,Q  
6IMF3,Q6P6Q2,Q6P6R2,Q91XN4,Q91ZS3,Q9QZQ5,Q9Z2L0

10 O54800;Q5DWW2,O70594,P23593,P33436,P52590,Q06000,Q09030,Q4KLZ6,Q99PP0,Q9Z2L0

6 P11762,P33436,P42854,P52590,Q09030,Q4KLZ6

8 P19223,P33436,P42854,P52590,P55281,Q09030,Q4KLZ6,Q6IG02

7 B1H234,O70594,P33436,P36860,P52590,Q09030,Q4KLZ6

8 P01946,P02091,P23593,P52590,Q09030,Q4KLZ6,Q9WTT6,Q9Z2L0

10 O70594,P30120,P33436,P42854,P52590,Q09030,Q4KLZ6,Q99MH3,Q9WTT6,Q9Z2L0

9 P01039,P23593,P33436,P36860,P52590,Q09030,Q4KLZ6,Q6AY61,Q9WTT6

7 B1H234,O54800;Q5DWW2,P11762,P42854,P52590,Q4KLZ6,Q9Z2L0

|    |                       |                               |    |                                                                                                                                      |
|----|-----------------------|-------------------------------|----|--------------------------------------------------------------------------------------------------------------------------------------|
| 26 | 1,2,3,4,5,6<br>,18,20 | 7,8,17,19,<br>21,22,23,2<br>4 | 9  | O54800;Q5DWV2,P11762,P33436,P42854,P52590,Q03191,Q4KLZ6,Q91ZS3,Q9Z2L0                                                                |
| 27 | 1,2,3,4,5,6<br>,18,21 | 7,8,17,19,<br>20,22,23,2<br>4 | 10 | B1H234,O54800;Q5DWV2,O89117,P36860,P52590,Q09030,Q4KLZ6,Q9JJ50,Q9WTT6,Q9Z2L0                                                         |
| 28 | 1,2,3,4,5,6<br>,18,22 | 7,8,17,19,<br>20,21,23,2<br>4 | 13 | O54800;Q5DWV2,P11762,P23593,P30120,P52590,Q03191,Q09030,Q4KLZ6,Q6P6R2,Q91XN4,Q9EQS0,Q9WTT6,Q9Z2L0                                    |
| 29 | 1,2,3,4,5,6<br>,18,23 | 7,8,17,19,<br>20,21,22,2<br>4 | 18 | O54800;Q5DWV2,O70594,P16636,P30120,P33436,P42854,P47727,P52590,Q03191,Q09030,Q4KLZ6,Q6P6R2,Q91XN4,Q99MH3,Q9EQS0,Q9JJ50,Q9WTT6,Q9Z2L0 |
| 30 | 1,2,3,4,5,6<br>,18,24 | 7,8,17,19,<br>20,21,22,2<br>3 | 12 | B1H234,O54800;Q5DWV2,P23593,P33436,P52590,Q09030,Q4KLZ6,Q6P6R2,Q91XN4,Q9QX74,Q9WTT6,Q9Z2L0                                           |
| 31 | 1,2,3,4,5,6<br>,19,20 | 7,8,17,18,<br>21,22,23,2<br>4 | 6  | P11762,P42854,P52590,Q4KLZ6,Q5I0D1,Q9Z2L0                                                                                            |
| 32 | 1,2,3,4,5,6<br>,19,21 | 7,8,17,18,<br>20,22,23,2<br>4 | 7  | B1H234,P11762,P30919,P42854,P52590,Q09030,Q4KLZ6                                                                                     |
| 33 | 1,2,3,4,5,6<br>,19,22 | 7,8,17,18,<br>20,21,23,2<br>4 | 11 | P00507,P01946,P11762,P30919,P42854,P52590,Q09030,Q4KLZ6,Q6P6R2,Q9WTT6,Q9Z2L0                                                         |
| 34 | 1,2,3,4,5,6<br>,19,23 | 7,8,17,18,<br>20,21,22,2<br>4 | 9  | P02783,P11762,P42854,P47727,P52590,Q09030,Q4KLZ6,Q9WTT6,Q9Z2L0                                                                       |
| 35 | 1,2,3,4,5,6<br>,19,24 | 7,8,17,18,<br>20,21,22,2<br>3 | 9  | B1H234,P11762,P30919,P42854,P52590,Q09030,Q4KLZ6,Q6P6R2,Q9WTT6                                                                       |
| 36 | 1,2,3,4,5,6<br>,20,21 | 7,8,17,18,<br>19,22,23,2<br>4 | 10 | B1H234,O55145,P11762,P42854,P47967,P52590,P70549,Q09030,Q4KLZ6,Q6IG02                                                                |
| 37 | 1,2,3,4,5,6<br>,20,22 | 7,8,17,18,<br>19,21,23,2<br>4 | 10 | P11762,P23593,P42854,P52590,Q03191,Q09030,Q4KLZ6,Q6P6R2,Q9QX74,Q9Z2L0                                                                |
| 38 | 1,2,3,4,5,6<br>,20,23 | 7,8,17,18,<br>19,21,22,2<br>4 | 14 | P02783,P09656,P10758,P23739,P42854,P52590,Q03191,Q09030,Q4KLZ6,Q6IG02,Q6P6R2,Q99MH3,Q9QX74,Q9Z2L0                                    |

|    |                       |                                |    |                                                                                                                                                                                                     |
|----|-----------------------|--------------------------------|----|-----------------------------------------------------------------------------------------------------------------------------------------------------------------------------------------------------|
| 39 | 1,2,3,4,5,6<br>,20,24 | 7,8,17,18,<br>19,21,22,2<br>3  | 8  | P11762,P42854,P52590,Q09030,Q4KLZ6,Q6IG02,Q6P6R2,Q9QX74                                                                                                                                             |
| 40 | 1,2,3,4,5,6<br>,21,22 | 7,8,17,18,<br>19,20,23,2<br>4  | 12 | B1H234,P01946,P23593,P30919,P36860,P42854,P52590,Q09030,Q4KLZ6,Q6AYC4,Q9WTT6,Q9Z2L0                                                                                                                 |
| 41 | 1,2,3,4,5,6<br>,21,23 | 7,8,17,18,<br>19,20,22,2<br>4  | 14 | B1H234,P02783,P09656,P30919,P36860,P42854,P47727,P52590,Q09030,Q4KLZ6,Q63532,Q9JJ50,Q9WTT6,Q9Z2L0                                                                                                   |
| 42 | 1,2,3,4,5,6<br>,21,24 | 7,8,17,18,<br>19,20,22,2<br>3  | 8  | B1H234,P30919,P36860,P52590,Q09030,Q10743,Q4KLZ6,Q9WTT6                                                                                                                                             |
| 43 | 1,2,3,4,5,6<br>,22,23 | 7,8,17,18,<br>19,20,21,2<br>4  | 20 | P00507,P02783,P09656,P13676,P23593,P30120,P30919,P42854,P47727,P52590,Q03191,Q09030,Q4KLZ6,Q63532,Q6P6R2,Q99MH3,Q9EQS0,Q9QX74,Q9WTT6,Q9Z2L0                                                         |
| 44 | 1,2,3,4,5,6<br>,22,24 | 7,8,17,18,<br>19,20,21,2<br>3  | 12 | P00507,P11762,P21674,P23593,P30919,P52590,Q09030,Q4KLZ6,Q6P6R2,Q9QX74,Q9WTT6,Q9Z2L0                                                                                                                 |
| 45 | 1,2,3,4,5,6<br>,23,24 | 7,8,17,18,<br>19,20,21,2<br>2  | 13 | P09656,P30919,P36860,P42854,P47727,P52590,Q09030,Q4KLZ6,Q6P6R2,Q9JJ50,Q9QX74,Q9WTT6,Q9Z2L0                                                                                                          |
| 46 | 1,2,3,4,5,7<br>,8,17  | 6,18,19,20<br>,21,22,23,<br>24 | 16 | O70594,P01681,P22006,P23593,P28648,P97580,Q30KJ2,Q4FZU2,Q6IFU7,Q6IFU8,Q6IFW6,Q6IG02,Q6IG05,Q6IMF3,Q6P6Q2,Q811M5                                                                                     |
| 47 | 1,2,3,4,5,7<br>,8,18  | 6,17,19,20<br>,21,22,23,<br>24 | 22 | O70594,P01681,P20762,P20766,P23593,P46844,P97580,Q30KJ2,Q4FZU2,Q4KLZ6,Q5I0E9,Q63317,Q6IFU7,Q6IFU8,Q6IFW6,Q6IG02,Q6IG05,Q6IMF3,Q6P6Q2,Q811M5,Q91ZS3,Q9WUW8                                           |
| 48 | 1,2,3,4,5,7<br>,8,19  | 6,17,18,20<br>,21,22,23,<br>24 | 15 | A0JPJ7,iRT-<br>Kit_WR_fusion,O70594,P01681,P47967,P97580,Q30KJ2,Q4FZU2,Q66H69,Q6IFU8,Q6IFW6,Q6IG02,Q6IG05,Q6IMF3,Q6P6Q2<br>D4A5U3,iRT-                                                              |
| 49 | 1,2,3,4,5,7<br>,8,20  | 6,17,18,19<br>,21,22,23,<br>24 | 28 | Kit_WR_fusion,P01681,P01836,P02780,P06911,P23593,P28648,P47967,P70549,P97697,Q03191,Q05702,Q10758,Q4FZU2,Q4G075,Q5I0D1,Q62946,Q6IFU7,Q6IFU8,Q6IFW6,Q6IG02,Q6IG05,Q6IMF3,Q6P6Q2,Q811M5,Q91ZS3,Q9WUW8 |
| 50 | 1,2,3,4,5,7<br>,8,21  | 6,17,18,19<br>,20,22,23,<br>24 | 24 | iRT-<br>Kit_WR_fusion,O70594,P01681,P11883,P18757,P22006,P23593,P30919,P36860,P46844,P47967,P70549,Q00715,Q4FZU2,Q6IFU7,Q6IFU8,Q6IFW6,Q6IG02,Q6IG05,Q6IMF3,Q6P6Q2,Q811M5,Q91ZS3,Q9WUW8              |
| 51 | 1,2,3,4,5,7<br>,8,22  | 6,17,18,19<br>,20,21,23,<br>24 | 19 | O70594,P01681,P23593,P27590,P35280,P97580,Q09030,Q30KJ2,Q4FZU2,Q5RLM2,Q6IFU7,Q6IFU8,Q6IFW6,Q6IG02,Q6IG05,Q6IMF3,Q6P6Q2,Q6P6R2,Q9WUW8                                                                |

|    |                       |                                |    |                                                                                                                               |
|----|-----------------------|--------------------------------|----|-------------------------------------------------------------------------------------------------------------------------------|
| 52 | 1,2,3,4,5,7<br>,8,23  | 6,17,18,19<br>,20,21,22,<br>24 | 18 | O70594,P01681,P20761,P20762,P23593,P34901,P46844,Q09030,Q4FZU2,Q6AYQ8,Q6IFU7,Q6IFU8,Q6IFW6,Q6IG02,Q6IG05,Q6IMF3,Q6P6Q2,Q9Z2L0 |
| 53 | 1,2,3,4,5,7<br>,8,24  | 6,17,18,19<br>,20,21,22,<br>23 | 17 | O70594,P01681,P23593,P30919,P46844,Q4FZU2,Q4KLZ6,Q5RLM2,Q6IFU7,Q6IFU8,Q6IFW6,Q6IG02,Q6IG05,Q6IMF3,Q6P6Q2,Q6P6R2,Q9WUW8        |
| 54 | 1,2,3,4,5,7<br>,17,18 | 6,8,19,20,<br>21,22,23,2<br>4  | 3  | O70594,Q4KLZ6,Q811M5                                                                                                          |
| 55 | 1,2,3,4,5,7<br>,17,19 | 6,8,18,20,<br>21,22,23,2<br>4  | 2  | O70594,P80299                                                                                                                 |
| 56 | 1,2,3,4,5,7<br>,17,20 | 6,8,18,19,<br>21,22,23,2<br>4  | 7  | P19223,P47967,P80299,Q03191,Q4FZU2,Q6IG02,Q811M5                                                                              |
| 57 | 1,2,3,4,5,7<br>,17,21 | 6,8,18,19,<br>20,22,23,2<br>4  | 11 | O70594,P19939,P22006,P36860,P70549,Q4FZU2,Q6AY61,Q6IFW6,Q6IG02,Q811M5,Q9R168                                                  |
| 58 | 1,2,3,4,5,7<br>,17,22 | 6,8,18,19,<br>20,21,23,2<br>4  | 4  | P23593,P80299,Q9R168,Q9WUW8                                                                                                   |
| 59 | 1,2,3,4,5,7<br>,17,23 | 6,8,18,19,<br>20,21,22,2<br>4  | 1  | O70594                                                                                                                        |
| 60 | 1,2,3,4,5,7<br>,17,24 | 6,8,18,19,<br>20,21,22,2<br>3  | 5  | P19939,P36860,Q4FZU2,Q4KLZ6,Q6AY61                                                                                            |
| 61 | 1,2,3,4,5,7<br>,18,19 | 6,8,17,20,<br>21,22,23,2<br>4  | 5  | P20766,P47967,P80299,P97840,Q4KLZ6                                                                                            |
| 62 | 1,2,3,4,5,7<br>,18,20 | 6,8,17,19,<br>21,22,23,2<br>4  | 9  | P47967,P70549,P80299,P97840,Q03191,Q4KLZ6,Q5I0D1,Q811M5,Q9WUW8                                                                |
| 63 | 1,2,3,4,5,7<br>,18,21 | 6,8,17,19,<br>20,22,23,2<br>4  | 8  | O89117,P36860,P47967,P70549,P80299,P97840,Q03191,Q4KLZ6                                                                       |
| 64 | 1,2,3,4,5,7<br>,18,22 | 6,8,17,19,<br>20,21,23,2<br>4  | 7  | P23593,P80299,Q03191,Q4KLZ6,Q6P6R2,Q9WUW8,Q9Z2L0                                                                              |

|    |                       |                               |    |                                                                              |
|----|-----------------------|-------------------------------|----|------------------------------------------------------------------------------|
| 65 | 1,2,3,4,5,7<br>,18,23 | 6,8,17,19,<br>20,21,22,2<br>4 | 10 | O70594,O89117,P30120,P80299,Q03191,Q4KLZ6,Q6AYQ8,Q6P6R2,Q9JJ50,Q9Z2L0        |
| 66 | 1,2,3,4,5,7<br>,18,24 | 6,8,17,19,<br>20,21,22,2<br>3 | 5  | O89117,Q03191,Q4KLZ6,Q5RLM2,Q6P6R2                                           |
| 67 | 1,2,3,4,5,7<br>,19,20 | 6,8,17,18,<br>21,22,23,2<br>4 | 5  | P10758,P47967,P80299,P97840,Q5I0D1                                           |
| 68 | 1,2,3,4,5,7<br>,19,21 | 6,8,17,18,<br>20,22,23,2<br>4 | 6  | P08649,P22006,P47967,P80299,P97840,Q62761;Q62762;Q62763                      |
| 69 | 1,2,3,4,5,7<br>,19,22 | 6,8,17,18,<br>20,21,23,2<br>4 | 1  | P80299                                                                       |
| 70 | 1,2,3,4,5,7<br>,19,23 | 6,8,17,18,<br>20,21,22,2<br>4 | 4  | P10758,P80299,Q6AYQ8,Q9Z2L0                                                  |
| 71 | 1,2,3,4,5,7<br>,19,24 | 6,8,17,18,<br>20,21,22,2<br>3 | 2  | Q4KLZ6,Q62761;Q62762;Q62763                                                  |
| 72 | 1,2,3,4,5,7<br>,20,21 | 6,8,17,18,<br>19,22,23,2<br>4 | 11 | P08649,P47967,P70549,P80299,P97840,Q03191,Q5I0D1,Q6IFW6,Q6IG02,Q811M5,Q9WUW8 |
| 73 | 1,2,3,4,5,7<br>,20,22 | 6,8,17,18,<br>19,21,23,2<br>4 | 6  | P23593,P47967,P80299,P97840,Q03191,Q9WUW8                                    |
| 74 | 1,2,3,4,5,7<br>,20,23 | 6,8,17,18,<br>19,21,22,2<br>4 | 6  | P08649,P10758,P23739,P80299,Q03191,Q6IG02                                    |
| 75 | 1,2,3,4,5,7<br>,20,24 | 6,8,17,18,<br>19,21,22,2<br>3 | 8  | P08649,P47967,Q03191,Q4FZU2,Q4KLZ6,Q6IFW6,Q6IG02,Q9WUW8                      |
| 76 | 1,2,3,4,5,7<br>,21,22 | 6,8,17,18,<br>19,20,23,2<br>4 | 7  | P08649,P17046,P47967,P70549,P80299,Q9R168,Q9WUW8                             |
| 77 | 1,2,3,4,5,7<br>,21,23 | 6,8,17,18,<br>19,20,22,2<br>4 | 6  | O89117,P08649,P36860,P70549,P80299,Q03191                                    |



|    |                       |                               |    |                                                                                                                     |
|----|-----------------------|-------------------------------|----|---------------------------------------------------------------------------------------------------------------------|
| 78 | 1,2,3,4,5,7<br>,21,24 | 6,8,17,18,<br>19,20,22,2<br>3 | 12 | O89117,P02761,P04762,P08649,P19939,P30919,P36860,Q4FZU2,Q4KLZ6,Q6AY61,Q6IFW6,Q6I<br>G02                             |
| 79 | 1,2,3,4,5,7<br>,22,23 | 6,8,17,18,<br>19,20,21,2<br>4 | 11 | B0LT89,P08649,P23593,P30120,P47727,P80299,Q03191,Q63556,Q6AYQ8,Q6P6R2,Q9Z2L0                                        |
| 80 | 1,2,3,4,5,7<br>,22,24 | 6,8,17,18,<br>19,20,21,2<br>3 | 8  | P08649,P23593,P30919,P80299,Q4KLZ6,Q5RLM2,Q6P6R2,Q9WUW8                                                             |
| 81 | 1,2,3,4,5,7<br>,23,24 | 6,8,17,18,<br>19,20,21,2<br>2 | 7  | B0LT89,P08649,P47727,Q4KLZ6,Q5RLM2,Q6AYQ8,Q6P6R2                                                                    |
| 82 | 1,2,3,4,5,8<br>,17,18 | 6,7,19,20,<br>21,22,23,2<br>4 | 16 | O70594,P01681,P23593,P97580,Q30KJ2,Q4FZU2,Q4KLZ6,Q6IFU7,Q6IFU8,Q6IFW6,Q6IG02,Q6I<br>G05,Q6IMF3,Q6P6Q2,Q811M5,Q9JJS8 |
| 83 | 1,2,3,4,5,8<br>,17,19 | 6,7,18,20,<br>21,22,23,2<br>4 | 13 | P01681,P01835,P22006,P97580,Q30KJ2,Q4FZU2,Q66H69,Q6IFU8,Q6IFW6,Q6IG02,Q6IG05,Q6I<br>MF3,Q6P6Q2                      |
| 84 | 1,2,3,4,5,8<br>,17,20 | 6,7,18,19,<br>21,22,23,2<br>4 | 16 | D4A5U3,P01681,P19223,P28648,P36375,P36376,Q10758,Q4FZU2,Q6IFU7,Q6IFU8,Q6IFW6,Q6I<br>G02,Q6IG05,Q6IMF3,Q6P6Q2,Q811M5 |
| 85 | 1,2,3,4,5,8<br>,17,21 | 6,7,18,19,<br>20,22,23,2<br>4 | 13 | O70594,P01681,P22006,P70549,Q4FZU2,Q6IFU7,Q6IFU8,Q6IFW6,Q6IG02,Q6IG05,Q6IMF3,Q6P<br>6Q2,Q811M5                      |
| 86 | 1,2,3,4,5,8<br>,17,22 | 6,7,18,19,<br>20,21,23,2<br>4 | 12 | P01681,P23593,P27590,P97580,Q30KJ2,Q4FZU2,Q6IFU7,Q6IFU8,Q6IFW6,Q6IG02,Q6IMF3,Q6P<br>6Q2                             |
| 87 | 1,2,3,4,5,8<br>,17,23 | 6,7,18,19,<br>20,21,22,2<br>4 | 15 | O70594,P01681,P22006,P23593,P34901,P36376,Q4FZU2,Q5PQL7,Q6IFU7,Q6IFU8,Q6IFW6,Q6I<br>G02,Q6IG05,Q6IMF3,Q6P6Q2        |
| 88 | 1,2,3,4,5,8<br>,17,24 | 6,7,18,19,<br>20,21,22,2<br>3 | 11 | P01681,P23593,Q4FZU2,Q4KLZ6,Q6IFU7,Q6IFU8,Q6IFW6,Q6IG02,Q6IG05,Q6IMF3,Q6P6Q2                                        |
| 89 | 1,2,3,4,5,8<br>,18,19 | 6,7,17,20,<br>21,22,23,2<br>4 | 7  | P01681,P97580,Q30KJ2,Q4KLZ6,Q6IG05,Q6IMF3,Q6P6Q2                                                                    |
| 90 | 1,2,3,4,5,8<br>,18,20 | 6,7,17,19,<br>21,22,23,2<br>4 | 14 | P01681,Q10758,Q4FZU2,Q4KLZ6,Q6IFU7,Q6IFU8,Q6IFW6,Q6IG02,Q6IG05,Q6IMF3,Q6P6Q2,Q8<br>11M5,Q91ZS3,Q9R168               |

|     |                       |                               |    |                                                                                                                               |
|-----|-----------------------|-------------------------------|----|-------------------------------------------------------------------------------------------------------------------------------|
| 91  | 1,2,3,4,5,8<br>,18,21 | 6,7,17,19,<br>20,22,23,2<br>4 | 15 | O89117,P01681,P02625,P22006,P70549,Q4FZU2,Q4KLZ6,Q6IFU7,Q6IFU8,Q6IFW6,Q6IG02,Q6IG05,Q6IMF3,Q6P6Q2,Q91ZS3                      |
| 92  | 1,2,3,4,5,8<br>,18,22 | 6,7,17,19,<br>20,21,23,2<br>4 | 8  | P01681,P23593,P27590,P97580,Q30KJ2,Q4KLZ6,Q6IFU7,Q9Z2L0                                                                       |
| 93  | 1,2,3,4,5,8<br>,18,23 | 6,7,17,19,<br>20,21,22,2<br>4 | 12 | O70594,P01681,P20762,Q4KLZ6,Q6IFU7,Q6IFW6,Q6IG02,Q6IG05,Q6IMF3,Q6P6Q2,Q99MH3,Q9Z2L0                                           |
| 94  | 1,2,3,4,5,8<br>,18,24 | 6,7,17,19,<br>20,21,22,2<br>3 | 11 | P01681,P23593,Q4FZU2,Q4KLZ6,Q6IFU7,Q6IFU8,Q6IFW6,Q6IG02,Q6IMF3,Q6P6Q2,Q6P6R2                                                  |
| 95  | 1,2,3,4,5,8<br>,19,20 | 6,7,17,18,<br>21,22,23,2<br>4 | 14 | D4A5U3,P01681,P47967,P97580,Q10758,Q4FZU2,Q5I0D1,Q6IFU7,Q6IFU8,Q6IFW6,Q6IG02,Q6IG05,Q6IMF3,Q6P6Q2                             |
| 96  | 1,2,3,4,5,8<br>,19,21 | 6,7,17,18,<br>20,22,23,2<br>4 | 13 | P01681,P22006,P30919,P97580,Q10743,Q4FZU2,Q66H69,Q6IFU8,Q6IFW6,Q6IG02,Q6IG05,Q6IMF3,Q6P6Q2                                    |
| 97  | 1,2,3,4,5,8<br>,19,22 | 6,7,17,18,<br>20,21,23,2<br>4 | 9  | P00507,P01681,P27590,P30919,P97580,Q30KJ2,Q6IFW6,Q6IMF3,Q6P6Q2                                                                |
| 98  | 1,2,3,4,5,8<br>,19,23 | 6,7,17,18,<br>20,21,22,2<br>4 | 9  | P01681,P97580,Q4FZU2,Q6IFW6,Q6IG02,Q6IG05,Q6IMF3,Q6P6Q2,Q9Z2L0                                                                |
| 99  | 1,2,3,4,5,8<br>,19,24 | 6,7,17,18,<br>20,21,22,2<br>3 | 11 | O54728,P01681,P30919,Q10743,Q4FZU2,Q4KLZ6,Q6IFU8,Q6IFW6,Q6IG02,Q6IMF3,Q6P6Q2                                                  |
| 100 | 1,2,3,4,5,8<br>,20,21 | 6,7,17,18,<br>19,22,23,2<br>4 | 18 | D4A5U3,P00731,P01681,P36375,P47967,P70549,Q10743,Q10758,Q4FZU2,Q5I0D1,Q6IFU7,Q6IFU8,Q6IFW6,Q6IG02,Q6IG05,Q6IMF3,Q6P6Q2,Q811M5 |
| 101 | 1,2,3,4,5,8<br>,20,22 | 6,7,17,18,<br>19,21,23,2<br>4 | 12 | P01681,P23593,P97580,Q30KJ2,Q4FZU2,Q6IFU7,Q6IFU8,Q6IFW6,Q6IG02,Q6IG05,Q6IMF3,Q6P6Q2                                           |
| 102 | 1,2,3,4,5,8<br>,20,23 | 6,7,17,18,<br>19,21,22,2<br>4 | 16 | P01681,P10758,P19132,P23739,P34901,P36376,Q10758,Q4FZU2,Q6IFU7,Q6IFU8,Q6IFW6,Q6IG02,Q6IG05,Q6IMF3,Q6P6Q2,Q9Z2L0               |
| 103 | 1,2,3,4,5,8<br>,20,24 | 6,7,17,18,<br>19,21,22,2<br>3 | 12 | P01681,Q10743,Q10758,Q4FZU2,Q4KLZ6,Q6IFU7,Q6IFU8,Q6IFW6,Q6IG02,Q6IG05,Q6IMF3,Q6P6Q2                                           |

|     |                        |                               |    |                                                                                                                        |
|-----|------------------------|-------------------------------|----|------------------------------------------------------------------------------------------------------------------------|
| 104 | 1,2,3,4,5,8<br>,21,22  | 6,7,17,18,<br>19,20,23,2<br>4 | 14 | P01681,P23593,P30919,P70549,P97580,Q10743,Q30KJ2,Q4FZU2,Q6IFU7,Q6IFU8,Q6IFW6,Q6IG02,Q6IMF3,Q6P6Q2                      |
| 105 | 1,2,3,4,5,8<br>,21,23  | 6,7,17,18,<br>19,20,22,2<br>4 | 12 | P01681,P22006,P30919,P70549,Q4FZU2,Q6IFU7,Q6IFU8,Q6IFW6,Q6IG02,Q6IG05,Q6IMF3,Q6P6Q2                                    |
| 106 | 1,2,3,4,5,8<br>,21,24  | 6,7,17,18,<br>19,20,22,2<br>3 | 13 | P01681,P30919,P36860,Q10743,Q4FZU2,Q4KLZ6,Q6IFU7,Q6IFU8,Q6IFW6,Q6IG02,Q6IG05,Q6IMF3,Q6P6Q2                             |
| 107 | 1,2,3,4,5,8<br>,22,23  | 6,7,17,18,<br>19,20,21,2<br>4 | 17 | P00507,P01681,P23593,P27590,P30919,P34901,P97580,Q09030,Q30KJ2,Q6IFU7,Q6IFW6,Q6IG02,Q6IMF3,Q6P6Q2,Q6P6R2,Q99MH3,Q9Z2L0 |
| 108 | 1,2,3,4,5,8<br>,22,24  | 6,7,17,18,<br>19,20,21,2<br>3 | 16 | P00507,P01681,P23593,P30919,P97580,Q10743,Q30KJ2,Q4FZU2,Q4KLZ6,Q6IFU7,Q6IFU8,Q6IFW6,Q6IG02,Q6IMF3,Q6P6Q2,Q6P6R2        |
| 109 | 1,2,3,4,5,8<br>,23,24  | 6,7,17,18,<br>19,20,21,2<br>2 | 15 | P01681,P23593,P30919,P34901,Q4FZU2,Q4KLZ6,Q5PQL7,Q6IFU7,Q6IFU8,Q6IFW6,Q6IG02,Q6IG05,Q6IMF3,Q6P6Q2,Q6P6R2               |
| 110 | 1,2,3,4,5,1<br>7,18,19 | 6,7,8,20,2<br>1,22,23,24      | 1  | Q4KLZ6                                                                                                                 |
| 111 | 1,2,3,4,5,1<br>7,18,20 | 6,7,8,19,2<br>1,22,23,24      | 3  | P19223,Q4KLZ6,Q811M5                                                                                                   |
| 112 | 1,2,3,4,5,1<br>7,18,21 | 6,7,8,19,2<br>0,22,23,24      | 3  | P22006,Q4KLZ6,Q811M5                                                                                                   |
| 113 | 1,2,3,4,5,1<br>7,18,22 | 6,7,8,19,2<br>0,21,23,24      | 3  | Q4KLZ6,Q63617,Q812E4                                                                                                   |
| 114 | 1,2,3,4,5,1<br>7,18,23 | 6,7,8,19,2<br>0,21,22,24      | 5  | P08723,P30120,Q4KLZ6,Q63617,Q9Z2L0                                                                                     |
| 115 | 1,2,3,4,5,1<br>7,18,24 | 6,7,8,19,2<br>0,21,22,23      | 3  | Q4KLZ6,Q63617,Q9WTT6                                                                                                   |
| 116 | 1,2,3,4,5,1<br>7,19,20 | 6,7,8,18,2<br>1,22,23,24      | 2  | P19223,Q6IG02                                                                                                          |
| 117 | 1,2,3,4,5,1<br>7,19,21 | 6,7,8,18,2<br>0,22,23,24      | 2  | P22006,Q9WVK7                                                                                                          |
| 118 | 1,2,3,4,5,1<br>7,19,22 | 6,7,8,18,2<br>0,21,23,24      | 0  |                                                                                                                        |
| 119 | 1,2,3,4,5,1<br>7,19,23 | 6,7,8,18,2<br>0,21,22,24      | 0  |                                                                                                                        |
| 120 | 1,2,3,4,5,1<br>7,19,24 | 6,7,8,18,2<br>0,21,22,23      | 1  | Q4KLZ6                                                                                                                 |

|     |                        |                          |                                                           |
|-----|------------------------|--------------------------|-----------------------------------------------------------|
| 121 | 1,2,3,4,5,1<br>7,20,21 | 6,7,8,18,1<br>9,22,23,24 | 5 P19223,P70549,Q4FZU2,Q6IG02,Q811M5                      |
| 122 | 1,2,3,4,5,1<br>7,20,22 | 6,7,8,18,1<br>9,21,23,24 | 1 P19223                                                  |
| 123 | 1,2,3,4,5,1<br>7,20,23 | 6,7,8,18,1<br>9,21,22,24 | 4 P19223,P23739,P36376,Q6IG02                             |
| 124 | 1,2,3,4,5,1<br>7,20,24 | 6,7,8,18,1<br>9,21,22,23 | 4 P19223,Q4FZU2,Q4KLZ6,Q6IG02                             |
| 125 | 1,2,3,4,5,1<br>7,21,22 | 6,7,8,18,1<br>9,20,23,24 | 1 Q9R168                                                  |
| 126 | 1,2,3,4,5,1<br>7,21,23 | 6,7,8,18,1<br>9,20,22,24 | 1 P22006                                                  |
| 127 | 1,2,3,4,5,1<br>7,21,24 | 6,7,8,18,1<br>9,20,22,23 | 7 P19939,P36860,Q4FZU2,Q4KLZ6,Q6AY61,Q6IFW6,Q6IG02        |
| 128 | 1,2,3,4,5,1<br>7,22,23 | 6,7,8,18,1<br>9,20,21,24 | 8 P08723,P22283,P30120,P47727,Q63617,Q9QW07,Q9WTT6,Q9Z2L0 |
| 129 | 1,2,3,4,5,1<br>7,22,24 | 6,7,8,18,1<br>9,20,21,23 | 5 P23593,Q4KLZ6,Q63617,Q6P6R2,Q9WTT6                      |
| 130 | 1,2,3,4,5,1<br>7,23,24 | 6,7,8,18,1<br>9,20,21,22 | 4 Q4KLZ6,Q5PQL7,Q63617,Q9WTT6                             |
| 131 | 1,2,3,4,5,1<br>8,19,20 | 6,7,8,17,2<br>1,22,23,24 | 3 P47967,Q4KLZ6,Q5I0D1                                    |
| 132 | 1,2,3,4,5,1<br>8,19,21 | 6,7,8,17,2<br>0,22,23,24 | 1 Q4KLZ6                                                  |
| 133 | 1,2,3,4,5,1<br>8,19,22 | 6,7,8,17,2<br>0,21,23,24 | 2 Q4KLZ6,Q9Z2L0                                           |
| 134 | 1,2,3,4,5,1<br>8,19,23 | 6,7,8,17,2<br>0,21,22,24 | 3 P30120,Q4KLZ6,Q9Z2L0                                    |
| 135 | 1,2,3,4,5,1<br>8,19,24 | 6,7,8,17,2<br>0,21,22,23 | 2 Q4KLZ6,Q9WTT6                                           |
| 136 | 1,2,3,4,5,1<br>8,20,21 | 6,7,8,17,1<br>9,22,23,24 | 7 P47967,P70549,P97840,Q03191,Q4KLZ6,Q6IG02,Q811M5        |
| 137 | 1,2,3,4,5,1<br>8,20,22 | 6,7,8,17,1<br>9,21,23,24 | 2 Q03191,Q4KLZ6                                           |
| 138 | 1,2,3,4,5,1<br>8,20,23 | 6,7,8,17,1<br>9,21,22,24 | 4 P10758,Q03191,Q4KLZ6,Q9Z2L0                             |
| 139 | 1,2,3,4,5,1<br>8,20,24 | 6,7,8,17,1<br>9,21,22,23 | 2 Q4KLZ6,Q9QX74                                           |
| 140 | 1,2,3,4,5,1<br>8,21,22 | 6,7,8,17,1<br>9,20,23,24 | 3 P70549,Q4KLZ6,Q9WTT6                                    |

|     |                        |                          |    |                                                                                                                               |
|-----|------------------------|--------------------------|----|-------------------------------------------------------------------------------------------------------------------------------|
| 141 | 1,2,3,4,5,1<br>8,21,23 | 6,7,8,17,1<br>9,20,22,24 | 7  | O89117,P70549,Q4KLZ6,Q9JJ50,Q9QZK9,Q9WTT6,Q9Z2L0                                                                              |
| 142 | 1,2,3,4,5,1<br>8,21,24 | 6,7,8,17,1<br>9,20,22,23 | 3  | O89117,Q4KLZ6,Q9WTT6                                                                                                          |
| 143 | 1,2,3,4,5,1<br>8,22,23 | 6,7,8,17,1<br>9,20,21,24 | 18 | P08723,P09456,P13676,P22283,P24368,P30120,P36374,P47727,Q03191,Q4KLZ6,Q63617,Q6P6R2,Q812E4,Q99MH3,Q9EQS0,Q9QX74,Q9WTT6,Q9Z2L0 |
| 144 | 1,2,3,4,5,1<br>8,22,24 | 6,7,8,17,1<br>9,20,21,23 | 6  | P21674,Q4KLZ6,Q63617,Q6P6R2,Q9QX74,Q9WTT6                                                                                     |
| 145 | 1,2,3,4,5,1<br>8,23,24 | 6,7,8,17,1<br>9,20,21,22 | 7  | O89117,Q4KLZ6,Q63617,Q6P6R2,Q9QX74,Q9WTT6,Q9Z2L0                                                                              |
| 146 | 1,2,3,4,5,1<br>9,20,21 | 6,7,8,17,1<br>8,22,23,24 | 3  | P47967,Q5I0D1,Q6IG02                                                                                                          |
| 147 | 1,2,3,4,5,1<br>9,20,22 | 6,7,8,17,1<br>8,21,23,24 | 0  |                                                                                                                               |
| 148 | 1,2,3,4,5,1<br>9,20,23 | 6,7,8,17,1<br>8,21,22,24 | 2  | P10758,P23739                                                                                                                 |
| 149 | 1,2,3,4,5,1<br>9,20,24 | 6,7,8,17,1<br>8,21,22,23 | 2  | Q4KLZ6,Q6IG02                                                                                                                 |
| 150 | 1,2,3,4,5,1<br>9,21,22 | 6,7,8,17,1<br>8,20,23,24 | 1  | P30919                                                                                                                        |
| 151 | 1,2,3,4,5,1<br>9,21,23 | 6,7,8,17,1<br>8,20,22,24 | 0  |                                                                                                                               |
| 152 | 1,2,3,4,5,1<br>9,21,24 | 6,7,8,17,1<br>8,20,22,23 | 3  | P30919,Q4KLZ6,Q62761;Q62762;Q62763                                                                                            |
| 153 | 1,2,3,4,5,1<br>9,22,23 | 6,7,8,17,1<br>8,20,21,24 | 7  | P00507,P30120,P47727,Q6P6R2,Q9QX74,Q9WTT6,Q9Z2L0                                                                              |
| 154 | 1,2,3,4,5,1<br>9,22,24 | 6,7,8,17,1<br>8,20,21,23 | 6  | P00507,P30919,Q4KLZ6,Q6P6R2,Q9QX74,Q9WTT6                                                                                     |
| 155 | 1,2,3,4,5,1<br>9,23,24 | 6,7,8,17,1<br>8,20,21,22 | 4  | Q4KLZ6,Q6P6R2,Q9QX74,Q9WTT6                                                                                                   |
| 156 | 1,2,3,4,5,2<br>0,21,22 | 6,7,8,17,1<br>8,19,23,24 | 2  | P70549,Q6IG02                                                                                                                 |
| 157 | 1,2,3,4,5,2<br>0,21,23 | 6,7,8,17,1<br>8,19,22,24 | 6  | P08649,P10758,P23739,P70549,Q03191,Q6IG02                                                                                     |
| 158 | 1,2,3,4,5,2<br>0,21,24 | 6,7,8,17,1<br>8,19,22,23 | 6  | P08649,P70549,Q4KLZ6,Q6IFW6,Q6IG02,Q6P6Q2                                                                                     |
| 159 | 1,2,3,4,5,2<br>0,22,23 | 6,7,8,17,1<br>8,19,21,24 | 5  | P23739,Q03191,Q6P6R2,Q9QX74,Q9Z2L0                                                                                            |
| 160 | 1,2,3,4,5,2<br>0,22,24 | 6,7,8,17,1<br>8,19,21,23 | 5  | P21674,Q4KLZ6,Q6IG02,Q6P6R2,Q9QX74                                                                                            |

|     |                        |                                |    |                                                                                                                                                                                                                                                                                                                      |
|-----|------------------------|--------------------------------|----|----------------------------------------------------------------------------------------------------------------------------------------------------------------------------------------------------------------------------------------------------------------------------------------------------------------------|
| 161 | 1,2,3,4,5,2<br>0,23,24 | 6,7,8,17,1<br>8,19,21,22       | 8  | P10758,P23739,Q4KLZ6,Q5QE79,Q6IG02,Q6P6R2,Q9QX74,Q9QYP1                                                                                                                                                                                                                                                              |
| 162 | 1,2,3,4,5,2<br>1,22,23 | 6,7,8,17,1<br>8,19,20,24       | 4  | P30919,P47727,Q9WTT6,Q9Z2L0                                                                                                                                                                                                                                                                                          |
| 163 | 1,2,3,4,5,2<br>1,22,24 | 6,7,8,17,1<br>8,19,20,23       | 4  | P21674,P30919,Q4KLZ6,Q9WTT6                                                                                                                                                                                                                                                                                          |
| 164 | 1,2,3,4,5,2<br>1,23,24 | 6,7,8,17,1<br>8,19,20,22       | 6  | O89117,P08649,P30919,P36860,Q4KLZ6,Q9WTT6                                                                                                                                                                                                                                                                            |
| 165 | 1,2,3,4,5,2<br>2,23,24 | 6,7,8,17,1<br>8,19,20,21       | 15 | P00507,P06761,P07150,P13676,P22283,P24368,P30919,P47727,P62804,Q4KLZ6,Q63617,Q6P6R2,Q9QX74,Q9WTT6,Q9Z2L0                                                                                                                                                                                                             |
| 166 | 1,2,3,4,6,7<br>,8,17   | 5,18,19,20<br>,21,22,23,<br>24 | 28 | iRT-<br>Kit_WR_fusion,O54800;Q5DWV2,O70417,O70594,P01681,P06911,P11762,P15399,P18418,P19629,P23593,P33436,P42854,P46844,P50115,P50280,P80299,P97580,Q05702,Q09030,Q30KJ2,Q4V885,Q5BK81,Q5GRG2,Q62946,Q63598,Q99PP0,Q9QZQ5                                                                                            |
| 167 | 1,2,3,4,6,7<br>,8,18   | 5,17,19,20<br>,21,22,23,<br>24 | 36 | O54800;Q5DWV2,O55004,O70417,O70594,P02625,P07151,P11762,P15399,P18418,P18757,P19629,P20762,P20766,P23593,P31044,P33436,P42854,P46844,P50280,P80299,P97580,P97615,Q05702,Q09030,Q30KJ2,Q3ZAV1,Q4V885,Q5BK81,Q5I0E9,Q63598,Q64240,Q91XN4,Q91ZS3,Q9QZQ5,Q9WTW7,Q9Z0W7                                                   |
| 168 | 1,2,3,4,6,7<br>,8,19   | 5,17,18,20<br>,21,22,23,<br>24 | 30 | A0JPJ7,iRT-<br>Kit_WR_fusion,O54800;Q5DWV2,O70417,O70594,P01681,P07151,P11598,P11762,P15399,P18418,P19629,P20761,P22282,P31044,P42854,P50115,P50280,P80299,P97580,P97615,Q05702,Q09030,Q30KJ2,Q4FZU4,Q4V885,Q66H69,Q99041,Q9JI85,Q9WTW7                                                                              |
| 169 | 1,2,3,4,6,7<br>,8,20   | 5,17,18,19<br>,21,22,23,<br>24 | 41 | D4A5U3,iRT-<br>Kit_WR_fusion,O54800;Q5DWV2,O70417,P01836,P02631,P02780,P05964,P06761,P06911,P11598,P11762,P12020,P15399,P18418,P19629,P22273,P22282,P23593,P31044,P42854,P50280,P80299,P97580,Q05702,Q09030,Q30KJ2,Q4G075,Q5BK81,Q5GRG2,Q62946,Q6IG02,Q6P9T8,Q78P75,Q91ZS3,Q99041,Q9JHB9,Q9JI85,Q9QW07,Q9QZQ5,Q9R0T3 |
| 170 | 1,2,3,4,6,7<br>,8,21   | 5,17,18,19<br>,20,22,23,<br>24 | 39 | B1H234,iRT-<br>Kit_WR_fusion,O54800;Q5DWV2,O70594,P00714,P02625,P02631,P11598,P11762,P15399,P16228,P18418,P18757,P19629,P20761,P23593,P30919,P36860,P42854,P46844,P50115,P50280,P80299,P97580,Q00715,Q05702,Q09030,Q10743,Q30KJ2,Q4V885,Q5BK81,Q63493,Q63598,Q6AYC4,Q6IFW6,Q91ZS3,Q99041,Q9JI85,Q9QZQ5               |
| 171 | 1,2,3,4,6,7<br>,8,22   | 5,17,18,19<br>,20,21,23,<br>24 | 24 | iRT-<br>Kit_WR_fusion,O54800;Q5DWV2,O70417,O70594,P11762,P15399,P19629,P20761,P23593,P35280,P42854,P46844,P50280,P80202,P80299,P97580,Q05702,Q09030,Q30KJ2,Q4FZU4,Q4V885,Q63598,Q91XN4,Q99041                                                                                                                        |
| 172 | 1,2,3,4,6,7<br>,8,23   | 5,17,18,19<br>,20,21,22,<br>24 | 29 | iRT-<br>Kit_WR_fusion,O70594,P02783,P09656,P11762,P15399,P19629,P20761,P20762,P23593,P38918,P42854,P46720,P46844,P50115,P50280,P53790,P80202,P80299,P97580,Q05702,Q09030,Q30KJ2,Q3ZAV1,Q5BK81,Q63532,Q63598,Q99MH3,Q9WTW7                                                                                            |

|     |                       |                                |                                                                                                                                                                                                                                             |
|-----|-----------------------|--------------------------------|---------------------------------------------------------------------------------------------------------------------------------------------------------------------------------------------------------------------------------------------|
| 173 | 1,2,3,4,6,7<br>,8,24  | 5,17,18,19<br>,20,21,22,<br>23 | iRT-<br>29 Kit_WR_fusion,O54800;Q5DWV2,O70417,O70594,P02761,P07151,P11762,P15399,P18418,P196<br>29,P20761,P23593,P30919,P42854,P46844,P50280,P53790,P80299,P97580,Q05702,Q09030,Q1<br>0743,Q30KJ2,Q3ZAV1,Q4KLZ6,Q63598,Q6IFW6,Q6P6R2,Q91ZS3 |
| 174 | 1,2,3,4,6,7<br>,17,18 | 5,8,19,20,<br>21,22,23,2<br>4  | 10 O54800;Q5DWV2,O70594,P11762,P20766,P33436,P80299,P97615,Q63598,Q99PP0,Q9WVH8                                                                                                                                                             |
| 175 | 1,2,3,4,6,7<br>,17,19 | 5,8,18,20,<br>21,22,23,2<br>4  | 4 O54800;Q5DWV2,O70594,P11762,P80299                                                                                                                                                                                                        |
| 176 | 1,2,3,4,6,7<br>,17,20 | 5,8,18,19,<br>21,22,23,2<br>4  | 9 O54800;Q5DWV2,P05964,P11598,P11762,P19223,P33436,P55091,P80299,Q5GRG2                                                                                                                                                                     |
| 177 | 1,2,3,4,6,7<br>,17,21 | 5,8,18,19,<br>20,22,23,2<br>4  | 8 B1H234,O54800;Q5DWV2,O70594,P11762,P18297,P36860,P80299,Q9R168                                                                                                                                                                            |
| 178 | 1,2,3,4,6,7<br>,17,22 | 5,8,18,19,<br>20,21,23,2<br>4  | 8 O54800;Q5DWV2,P01946,P02091,P11762,P23593,P80299,Q09030,Q9R168                                                                                                                                                                            |
| 179 | 1,2,3,4,6,7<br>,17,23 | 5,8,18,19,<br>20,21,22,2<br>4  | 10 O54800;Q5DWV2,O70594,P02783,P09656,P11762,P33436,P42854,P80299,Q09030,Q63598                                                                                                                                                             |
| 180 | 1,2,3,4,6,7<br>,17,24 | 5,8,18,19,<br>20,21,22,2<br>3  | 10 O54800;Q5DWV2,O70594,P01039,P11762,P23593,P36860,P80299,Q4KLZ6,Q63598,Q6AY61                                                                                                                                                             |
| 181 | 1,2,3,4,6,7<br>,18,19 | 5,8,17,20,<br>21,22,23,2<br>4  | 7 B1H234,O54800;Q5DWV2,P11762,P20766,P42854,P80299,P97615                                                                                                                                                                                   |
| 182 | 1,2,3,4,6,7<br>,18,20 | 5,8,17,19,<br>21,22,23,2<br>4  | 10 O54800;Q5DWV2,P11598,P11762,P19629,P33436,P80299,P97615,Q5GRG2,Q80WL1,Q91ZS3                                                                                                                                                             |
| 183 | 1,2,3,4,6,7<br>,18,21 | 5,8,17,19,<br>20,22,23,2<br>4  | 6 B1H234,O54800;Q5DWV2,O89117,P11762,P23739,P80299                                                                                                                                                                                          |
| 184 | 1,2,3,4,6,7<br>,18,22 | 5,8,17,19,<br>20,21,23,2<br>4  | 6 O54800;Q5DWV2,P11762,P23593,P80299,Q1WIM3,Q6P6R2                                                                                                                                                                                          |
| 185 | 1,2,3,4,6,7<br>,18,23 | 5,8,17,19,<br>20,21,22,2<br>4  | 13 O54800;Q5DWV2,O70594,P02783,P09656,P11762,P20766,P42854,P46844,P80299,Q09030,Q63<br>598,Q6AYQ8,Q99MH3                                                                                                                                    |

|     |                       |                               |    |                                                                                         |
|-----|-----------------------|-------------------------------|----|-----------------------------------------------------------------------------------------|
| 186 | 1,2,3,4,6,7<br>,18,24 | 5,8,17,19,<br>20,21,22,2<br>3 | 9  | B1H234,O54800;Q5DWV2,P06760,P11762,P20766,P80299,Q4KLZ6,Q63598,Q6P6R2                   |
| 187 | 1,2,3,4,6,7<br>,19,20 | 5,8,17,18,<br>21,22,23,2<br>4 | 12 | P05964,P10758,P11598,P11762,P19629,P42854,P80299,Q5GRG2,Q5I0D1,Q63617,Q9JI85,Q9R0<br>T3 |
| 188 | 1,2,3,4,6,7<br>,19,21 | 5,8,17,18,<br>20,22,23,2<br>4 | 5  | B1H234,P11598,P11762,P42854,P80299                                                      |
| 189 | 1,2,3,4,6,7<br>,19,22 | 5,8,17,18,<br>20,21,23,2<br>4 | 3  | P11762,P42854,P80299                                                                    |
| 190 | 1,2,3,4,6,7<br>,19,23 | 5,8,17,18,<br>20,21,22,2<br>4 | 5  | P02783,P10758,P11762,P42854,P80299                                                      |
| 191 | 1,2,3,4,6,7<br>,19,24 | 5,8,17,18,<br>20,21,22,2<br>3 | 4  | B1H234,P11762,P80299,Q4KLZ6                                                             |
| 192 | 1,2,3,4,6,7<br>,20,21 | 5,8,17,18,<br>19,22,23,2<br>4 | 12 | B1H234,O55145,P01835,P05964,P11598,P11762,P19629,P42854,P47967,P80299,Q5GRG2,Q636<br>17 |
| 193 | 1,2,3,4,6,7<br>,20,22 | 5,8,17,18,<br>19,21,23,2<br>4 | 7  | O54800;Q5DWV2,P11762,P19629,P23593,P42854,P80299,Q5GRG2                                 |
| 194 | 1,2,3,4,6,7<br>,20,23 | 5,8,17,18,<br>19,21,22,2<br>4 | 11 | P02783,P09656,P10758,P11598,P11762,P19629,P42854,P80299,Q09030,Q62894,Q9QYP1            |
| 195 | 1,2,3,4,6,7<br>,20,24 | 5,8,17,18,<br>19,21,22,2<br>3 | 7  | O54800;Q5DWV2,P11598,P11762,P80299,Q4KLZ6,Q5GRG2,Q9QYP1                                 |
| 196 | 1,2,3,4,6,7<br>,21,22 | 5,8,17,18,<br>19,20,23,2<br>4 | 7  | B1H234,P11762,P17046,P23593,P80299,Q09030,Q9R168                                        |
| 197 | 1,2,3,4,6,7<br>,21,23 | 5,8,17,18,<br>19,20,22,2<br>4 | 11 | B1H234,P02783,P09656,P11762,P18297,P36860,P42854,P46844,P80299,Q09030,Q63532            |
| 198 | 1,2,3,4,6,7<br>,21,24 | 5,8,17,18,<br>19,20,22,2<br>3 | 11 | B1H234,P01835,P02761,P04762,P11762,P18297,P30919,P36860,P46844,P80299,Q4KLZ6            |



|     |                       |                               |    |                                                                                                                                                        |
|-----|-----------------------|-------------------------------|----|--------------------------------------------------------------------------------------------------------------------------------------------------------|
| 199 | 1,2,3,4,6,7<br>,22,23 | 5,8,17,18,<br>19,20,21,2<br>4 | 13 | BOLT89,P02783,P06760,P09656,P11762,P23593,P30120,P42854,P80299,Q09030,Q63532,Q6P6R<br>2,Q99MH3                                                         |
| 200 | 1,2,3,4,6,7<br>,22,24 | 5,8,17,18,<br>19,20,21,2<br>3 | 12 | O54800;Q5DWV2,P02761,P06760,P11762,P22006,P23593,P30919,P80299,Q09030,Q4KLZ6,Q6P<br>6R2,Q9QX74                                                         |
| 201 | 1,2,3,4,6,7<br>,23,24 | 5,8,17,18,<br>19,20,21,2<br>2 | 14 | BOLT89,P02783,P06760,P09656,P11762,P42854,P46844,P80299,Q09030,Q4KLZ6,Q63598,Q6AY<br>Q8,Q6P6R2,Q9QX74                                                  |
| 202 | 1,2,3,4,6,8<br>,17,18 | 5,7,19,20,<br>21,22,23,2<br>4 | 17 | G3V686,O54800;Q5DWV2,O70594,P08649,P11762,P15399,P23593,P33436,P97580,P97615,Q05<br>702,Q06000,Q09030,Q30KJ2,Q63598,Q99PP0,Q9QZQ5                      |
| 203 | 1,2,3,4,6,8<br>,17,19 | 5,7,18,20,<br>21,22,23,2<br>4 | 8  | P01681,P11762,P15399,P42854,P97580,Q05702,Q30KJ2,Q9JI85                                                                                                |
| 204 | 1,2,3,4,6,8<br>,17,20 | 5,7,18,19,<br>21,22,23,2<br>4 | 21 | D4A5U3,O70417,P06911,P11762,P12020,P15399,P17559,P19223,P19629,P33436,P42854,P5028<br>0,P55091,P63029,P97580,Q05702,Q10758,Q30KJ2,Q5GRG2,Q6IG02,Q9JI85 |
| 205 | 1,2,3,4,6,8<br>,17,21 | 5,7,18,19,<br>20,22,23,2<br>4 | 11 | O70594,P02625,P02631,P15399,P97580,Q05702,Q09030,Q30KJ2,Q6IFW6,Q6IG02,Q9JI85                                                                           |
| 206 | 1,2,3,4,6,8<br>,17,22 | 5,7,18,19,<br>20,21,23,2<br>4 | 10 | O70417,P01946,P02091,P11762,P15399,P23593,P97580,Q05702,Q09030,Q30KJ2                                                                                  |
| 207 | 1,2,3,4,6,8<br>,17,23 | 5,7,18,19,<br>20,21,22,2<br>4 | 16 | O70594,P02783,P09656,P15399,P20761,P23593,P33436,P36376,P42854,P97580,Q05702,Q0903<br>0,Q30KJ2,Q63532,Q63598,Q99MH3                                    |
| 208 | 1,2,3,4,6,8<br>,17,24 | 5,7,18,19,<br>20,21,22,2<br>3 | 9  | P11762,P15399,P23593,P97580,Q05702,Q09030,Q30KJ2,Q4KLZ6,Q63598                                                                                         |
| 209 | 1,2,3,4,6,8<br>,18,19 | 5,7,17,20,<br>21,22,23,2<br>4 | 11 | O54800;Q5DWV2,P11762,P15399,P42854,P50280,P97580,P97615,Q05702,Q30KJ2,Q5PPH0,Q9<br>JI85                                                                |
| 210 | 1,2,3,4,6,8<br>,18,20 | 5,7,17,19,<br>21,22,23,2<br>4 | 19 | D4A5U3,O54800;Q5DWV2,P06911,P11762,P12020,P15399,P19629,P33436,P42854,P50280,P97<br>580,P97615,Q05702,Q10758,Q30KJ2,Q5GRG2,Q91ZS3,Q9JI85,Q9R168        |
| 211 | 1,2,3,4,6,8<br>,18,21 | 5,7,17,19,<br>20,22,23,2<br>4 | 13 | O54800;Q5DWV2,P02625,P02631,P11762,P15399,P54921,P97580,Q05702,Q09030,Q10743,Q3<br>0KJ2,Q91ZS3,Q9QZQ5                                                  |

|     |                       |                               |    |                                                                                                                                                    |
|-----|-----------------------|-------------------------------|----|----------------------------------------------------------------------------------------------------------------------------------------------------|
| 212 | 1,2,3,4,6,8<br>,18,22 | 5,7,17,19,<br>20,21,23,2<br>4 | 9  | O54800;Q5DWV2,P11762,P15399,P23593,P54921,P97580,Q05702,Q09030,Q30KJ2                                                                              |
| 213 | 1,2,3,4,6,8<br>,18,23 | 5,7,17,19,<br>20,21,22,2<br>4 | 20 | O54800;Q5DWV2,O70594,P02783,P09656,P11762,P15399,P20761,P20762,P23593,P42854,P54921,P80202,P97580,Q05702,Q09030,Q30KJ2,Q5BK81,Q63532,Q63598,Q99MH3 |
| 214 | 1,2,3,4,6,8<br>,18,24 | 5,7,17,19,<br>20,21,22,2<br>3 | 14 | O54800;Q5DWV2,P02625,P07151,P11762,P15399,P23593,P97580,P97615,Q05702,Q09030,Q30KJ2,Q4KLZ6,Q63598,Q91ZS3                                           |
| 215 | 1,2,3,4,6,8<br>,19,20 | 5,7,17,18,<br>21,22,23,2<br>4 | 17 | D4A5U3,P02780,P06911,P11762,P12020,P15399,P19629,P42854,P50280,P97580,Q05702,Q30KJ2,Q5GRG2,Q68G31,Q6IG02,Q6P9T8,Q9JI85                             |
| 216 | 1,2,3,4,6,8<br>,19,21 | 5,7,17,18,<br>20,22,23,2<br>4 | 10 | P11762,P15399,P30919,P42854,P97580,Q05702,Q10743,Q30KJ2,Q66H69,Q9JI85                                                                              |
| 217 | 1,2,3,4,6,8<br>,19,22 | 5,7,17,18,<br>20,21,23,2<br>4 | 10 | P00507,P11762,P15399,P30919,P42854,P97580,Q05702,Q09030,Q30KJ2,Q5PPH0                                                                              |
| 218 | 1,2,3,4,6,8<br>,19,23 | 5,7,17,18,<br>20,21,22,2<br>4 | 11 | P01681,P02783,P11762,P15399,P20761,P42854,P97580,Q05702,Q09030,Q30KJ2,Q63532                                                                       |
| 219 | 1,2,3,4,6,8<br>,19,24 | 5,7,17,18,<br>20,21,22,2<br>3 | 12 | O54728,P11762,P15399,P30919,P42854,P97580,Q05702,Q10743,Q30KJ2,Q4KLZ6,Q68G31,Q9JI85                                                                |
| 220 | 1,2,3,4,6,8<br>,20,21 | 5,7,17,18,<br>19,22,23,2<br>4 | 21 | D4A5U3,O55145,P02631,P02780,P06911,P11762,P12020,P15399,P19629,P42854,P50280,P97580,Q05702,Q10743,Q10758,Q30KJ2,Q5GRG2,Q6IFW6,Q6IG02,Q91ZS3,Q9JI85 |
| 221 | 1,2,3,4,6,8<br>,20,22 | 5,7,17,18,<br>19,21,23,2<br>4 | 14 | P06911,P11762,P12020,P15399,P19629,P23593,P42854,P50280,P97580,Q05702,Q09030,Q10743,Q30KJ2,Q5GRG2                                                  |
| 222 | 1,2,3,4,6,8<br>,20,23 | 5,7,17,18,<br>19,21,22,2<br>4 | 21 | P02783,P06911,P09656,P10758,P11762,P12020,P15399,P17559,P19629,P36376,P42854,P50280,P97580,Q05702,Q09030,Q10758,Q30KJ2,Q5GRG2,Q63532,Q6IG02,Q99MH3 |
| 223 | 1,2,3,4,6,8<br>,20,24 | 5,7,17,18,<br>19,21,22,2<br>3 | 16 | P06911,P11762,P12020,P15399,P19629,P42854,P50280,P97580,Q05702,Q10743,Q30KJ2,Q4KLZ6,Q5GRG2,Q6IFW6,Q6IG02,Q9JI85                                    |
| 224 | 1,2,3,4,6,8<br>,21,22 | 5,7,17,18,<br>19,20,23,2<br>4 | 13 | P02625,P11762,P15399,P19629,P23593,P30919,P54921,P97580,Q05702,Q09030,Q10743,Q30KJ2,Q6AYC4                                                         |

|     |                        |                               |    |                                                                                                                                   |
|-----|------------------------|-------------------------------|----|-----------------------------------------------------------------------------------------------------------------------------------|
| 225 | 1,2,3,4,6,8<br>,21,23  | 5,7,17,18,<br>19,20,22,2<br>4 | 13 | P02783,P09656,P19629,P20761,P30919,P42854,P54921,P97580,Q05702,Q09030,Q30KJ2,Q6353<br>2,Q99MH3                                    |
| 226 | 1,2,3,4,6,8<br>,21,24  | 5,7,17,18,<br>19,20,22,2<br>3 | 13 | P02625,P11762,P15399,P30919,P36860,P97580,Q05702,Q09030,Q10743,Q30KJ2,Q4KLZ6,Q6IF<br>W6,Q6IG02                                    |
| 227 | 1,2,3,4,6,8<br>,22,23  | 5,7,17,18,<br>19,20,21,2<br>4 | 18 | P00507,P02783,P09656,P11762,P15399,P20761,P23593,P30919,P42854,P54921,P80202,P97580<br>,Q05702,Q09030,Q30KJ2,Q63532,Q6P6R2,Q99MH3 |
| 228 | 1,2,3,4,6,8<br>,22,24  | 5,7,17,18,<br>19,20,21,2<br>3 | 13 | P00507,P06760,P11762,P15399,P23593,P30919,P97580,Q05702,Q09030,Q10743,Q30KJ2,Q4KL<br>Z6,Q6P6R2                                    |
| 229 | 1,2,3,4,6,8<br>,23,24  | 5,7,17,18,<br>19,20,21,2<br>2 | 18 | P02783,P06760,P09656,P11762,P15399,P20761,P23593,P30919,P42854,P46844,P97580,Q0570<br>2,Q09030,Q30KJ2,Q4KLZ6,Q63532,Q63598,Q6P6R2 |
| 230 | 1,2,3,4,6,1<br>7,18,19 | 5,7,8,20,2<br>1,22,23,24      |    | 4 O54800;Q5DWV2,P33436,Q06000,Q8K1G0                                                                                              |
| 231 | 1,2,3,4,6,1<br>7,18,20 | 5,7,8,19,2<br>1,22,23,24      |    | 7 O54800;Q5DWV2,P19223,P33436,P55091,Q06000,Q5GRG2,Q8K1G0                                                                         |
| 232 | 1,2,3,4,6,1<br>7,18,21 | 5,7,8,19,2<br>0,22,23,24      |    | 2 O54800;Q5DWV2,P33436                                                                                                            |
| 233 | 1,2,3,4,6,1<br>7,18,22 | 5,7,8,19,2<br>0,21,23,24      |    | 7 O54800;Q5DWV2,P01946,P02091,P06760,P23593,Q06000,Q9WTT6                                                                         |
| 234 | 1,2,3,4,6,1<br>7,18,23 | 5,7,8,19,2<br>0,21,22,24      |    | 5 O54800;Q5DWV2,O70594,P06760,P33436,Q99MH3                                                                                       |
| 235 | 1,2,3,4,6,1<br>7,18,24 | 5,7,8,19,2<br>0,21,22,23      |    | 5 O54800;Q5DWV2,P06760,P33436,Q4KLZ6,Q9WTT6                                                                                       |
| 236 | 1,2,3,4,6,1<br>7,19,20 | 5,7,8,18,2<br>1,22,23,24      |    | 3 P11762,P19223,Q8K1G0                                                                                                            |
| 237 | 1,2,3,4,6,1<br>7,19,21 | 5,7,8,18,2<br>0,22,23,24      |    | 1 Q9WVK7                                                                                                                          |
| 238 | 1,2,3,4,6,1<br>7,19,22 | 5,7,8,18,2<br>0,21,23,24      |    | 3 P01946,P02091,P06760                                                                                                            |
| 239 | 1,2,3,4,6,1<br>7,19,23 | 5,7,8,18,2<br>0,21,22,24      |    | 3 P02783,P06760,P42854                                                                                                            |
| 240 | 1,2,3,4,6,1<br>7,19,24 | 5,7,8,18,2<br>0,21,22,23      |    | 2 P06760,Q4KLZ6                                                                                                                   |
| 241 | 1,2,3,4,6,1<br>7,20,21 | 5,7,8,18,1<br>9,22,23,24      |    | 4 O55145,P01041,P19223,P63029                                                                                                     |
| 242 | 1,2,3,4,6,1<br>7,20,22 | 5,7,8,18,1<br>9,21,23,24      |    | 4 P01946,P02091,P06760,P19223                                                                                                     |

|     |                        |                          |                                                                          |
|-----|------------------------|--------------------------|--------------------------------------------------------------------------|
| 243 | 1,2,3,4,6,1<br>7,20,23 | 5,7,8,18,1<br>9,21,22,24 | 7 P02783,P06760,P09656,P10758,P19223,P33436,P63029                       |
| 244 | 1,2,3,4,6,1<br>7,20,24 | 5,7,8,18,1<br>9,21,22,23 | 4 P06760,P19223,Q4KLZ6,Q9QYP1                                            |
| 245 | 1,2,3,4,6,1<br>7,21,22 | 5,7,8,18,1<br>9,20,23,24 | 3 P01946,P02091,Q9R168                                                   |
| 246 | 1,2,3,4,6,1<br>7,21,23 | 5,7,8,18,1<br>9,20,22,24 | 2 P02783,P09656                                                          |
| 247 | 1,2,3,4,6,1<br>7,21,24 | 5,7,8,18,1<br>9,20,22,23 | 3 P01039,P36860,Q4KLZ6                                                   |
| 248 | 1,2,3,4,6,1<br>7,22,23 | 5,7,8,18,1<br>9,20,21,24 | 10 P01946,P02091,P02783,P06760,P09656,P23593,Q09030,Q63532,Q99MH3,Q9WTT6 |
| 249 | 1,2,3,4,6,1<br>7,22,24 | 5,7,8,18,1<br>9,20,21,23 | 7 D3ZUC6,P01946,P02091,P06760,P23593,Q4KLZ6,Q9WTT6                       |
| 250 | 1,2,3,4,6,1<br>7,23,24 | 5,7,8,18,1<br>9,20,21,22 | 4 P06760,P09656,Q4KLZ6,Q9WTT6                                            |
| 251 | 1,2,3,4,6,1<br>8,19,20 | 5,7,8,17,2<br>1,22,23,24 | 3 O54800;Q5DWV2,P11762,P39069                                            |
| 252 | 1,2,3,4,6,1<br>8,19,21 | 5,7,8,17,2<br>0,22,23,24 | 1 O54800;Q5DWV2                                                          |
| 253 | 1,2,3,4,6,1<br>8,19,22 | 5,7,8,17,2<br>0,21,23,24 | 5 O54800;Q5DWV2,P06760,P11762,Q5PPH0,Q9WTT6                              |
| 254 | 1,2,3,4,6,1<br>8,19,23 | 5,7,8,17,2<br>0,21,22,24 | 4 O54800;Q5DWV2,P06760,P42854,Q9WTT6                                     |
| 255 | 1,2,3,4,6,1<br>8,19,24 | 5,7,8,17,2<br>0,21,22,23 | 5 O54800;Q5DWV2,P06760,P11762,Q4KLZ6,Q9WTT6                              |
| 256 | 1,2,3,4,6,1<br>8,20,21 | 5,7,8,17,1<br>9,22,23,24 | 2 O54800;Q5DWV2,O55145                                                   |
| 257 | 1,2,3,4,6,1<br>8,20,22 | 5,7,8,17,1<br>9,21,23,24 | 4 O54800;Q5DWV2,P06760,P11762,Q9QX74                                     |
| 258 | 1,2,3,4,6,1<br>8,20,23 | 5,7,8,17,1<br>9,21,22,24 | 9 O54800;Q5DWV2,P02783,P06760,P09656,P10758,P42854,P54921,Q99MH3,Q9QX74  |
| 259 | 1,2,3,4,6,1<br>8,20,24 | 5,7,8,17,1<br>9,21,22,23 | 5 O54800;Q5DWV2,P06760,Q4KLZ6,Q9QX74,Q9QYP1                              |
| 260 | 1,2,3,4,6,1<br>8,21,22 | 5,7,8,17,1<br>9,20,23,24 | 4 O54800;Q5DWV2,P23739,P54921,Q9WTT6                                     |
| 261 | 1,2,3,4,6,1<br>8,21,23 | 5,7,8,17,1<br>9,20,22,24 | 5 O54800;Q5DWV2,P02783,P09656,P54921,Q9WTT6                              |
| 262 | 1,2,3,4,6,1<br>8,21,24 | 5,7,8,17,1<br>9,20,22,23 | 3 O54800;Q5DWV2,Q4KLZ6,Q9WTT6                                            |

|     |                        |                          |    |                                                                                                                               |
|-----|------------------------|--------------------------|----|-------------------------------------------------------------------------------------------------------------------------------|
| 263 | 1,2,3,4,6,1<br>8,22,23 | 5,7,8,17,1<br>9,20,21,24 | 17 | O54800;Q5DWV2,P02783,P06760,P09456,P09656,P13676,P30120,P54921,P55159,Q09030,Q63532,Q6P6R2,Q99MH3,Q9EQS0,Q9QX74,Q9WTT6,Q9Z2L0 |
| 264 | 1,2,3,4,6,1<br>8,22,24 | 5,7,8,17,1<br>9,20,21,23 | 10 | D3ZUC6,O54800;Q5DWV2,P06760,P13676,P22006,P23593,Q4KLZ6,Q6P6R2,Q9QX74,Q9WTT6                                                  |
| 265 | 1,2,3,4,6,1<br>8,23,24 | 5,7,8,17,1<br>9,20,21,22 | 8  | O54800;Q5DWV2,P06760,P09656,P13676,Q4KLZ6,Q6P6R2,Q9QX74,Q9WTT6                                                                |
| 266 | 1,2,3,4,6,1<br>9,20,21 | 5,7,8,17,1<br>8,22,23,24 | 5  | O55145,P05369,P11762,P42854,Q9JI85                                                                                            |
| 267 | 1,2,3,4,6,1<br>9,20,22 | 5,7,8,17,1<br>8,21,23,24 | 4  | P06760,P11762,P42854,Q9QX74                                                                                                   |
| 268 | 1,2,3,4,6,1<br>9,20,23 | 5,7,8,17,1<br>8,21,22,24 | 7  | P02783,P06760,P09656,P10758,P11762,P42854,Q9QX74                                                                              |
| 269 | 1,2,3,4,6,1<br>9,20,24 | 5,7,8,17,1<br>8,21,22,23 | 5  | P06760,P11762,Q4KLZ6,Q68G31,Q9QX74                                                                                            |
| 270 | 1,2,3,4,6,1<br>9,21,22 | 5,7,8,17,1<br>8,20,23,24 | 3  | P01946,P11762,P30919                                                                                                          |
| 271 | 1,2,3,4,6,1<br>9,21,23 | 5,7,8,17,1<br>8,20,22,24 | 3  | P02783,P09656,P42854                                                                                                          |
| 272 | 1,2,3,4,6,1<br>9,21,24 | 5,7,8,17,1<br>8,20,22,23 | 3  | P11762,P30919,Q4KLZ6                                                                                                          |
| 273 | 1,2,3,4,6,1<br>9,22,23 | 5,7,8,17,1<br>8,20,21,24 | 10 | P00507,P02783,P06760,P09656,P42854,Q63532,Q811M5,Q99MH3,Q9QX74,Q9WTT6                                                         |
| 274 | 1,2,3,4,6,1<br>9,22,24 | 5,7,8,17,1<br>8,20,21,23 | 8  | P00507,P06760,P11762,P30919,Q4KLZ6,Q6P6R2,Q9QX74,Q9WTT6                                                                       |
| 275 | 1,2,3,4,6,1<br>9,23,24 | 5,7,8,17,1<br>8,20,21,22 | 5  | P06760,P42854,Q4KLZ6,Q9QX74,Q9WTT6                                                                                            |
| 276 | 1,2,3,4,6,2<br>0,21,22 | 5,7,8,17,1<br>8,19,23,24 | 2  | O55145,P09656                                                                                                                 |
| 277 | 1,2,3,4,6,2<br>0,21,23 | 5,7,8,17,1<br>8,19,22,24 | 5  | O55145,P02783,P09656,P10758,P42854                                                                                            |
| 278 | 1,2,3,4,6,2<br>0,21,24 | 5,7,8,17,1<br>8,19,22,23 | 2  | O55145,Q4KLZ6                                                                                                                 |
| 279 | 1,2,3,4,6,2<br>0,22,23 | 5,7,8,17,1<br>8,19,21,24 | 8  | P02783,P06760,P09656,P10758,P42854,P54921,Q99MH3,Q9QX74                                                                       |
| 280 | 1,2,3,4,6,2<br>0,22,24 | 5,7,8,17,1<br>8,19,21,23 | 7  | P06760,P11762,P22006,Q4KLZ6,Q6P6R2,Q9QX74,Q9Z0V6                                                                              |
| 281 | 1,2,3,4,6,2<br>0,23,24 | 5,7,8,17,1<br>8,19,21,22 | 8  | P02783,P06760,P09656,P10758,Q4KLZ6,Q6P6R2,Q9QX74,Q9QYP1                                                                       |
| 282 | 1,2,3,4,6,2<br>1,22,23 | 5,7,8,17,1<br>8,19,20,24 | 8  | P02783,P09656,P30919,P54921,Q09030,Q63532,Q99MH3,Q9WTT6                                                                       |

|     |                        |                               |            |                                                                                                                                             |
|-----|------------------------|-------------------------------|------------|---------------------------------------------------------------------------------------------------------------------------------------------|
| 283 | 1,2,3,4,6,2<br>1,22,24 | 5,7,8,17,1<br>8,19,20,23      | 4          | P30919,Q4KLZ6,Q9QX74,Q9WTT6                                                                                                                 |
| 284 | 1,2,3,4,6,2<br>1,23,24 | 5,7,8,17,1<br>8,19,20,22      | 7          | P02783,P09656,P30919,P36860,Q4KLZ6,Q9QX74,Q9WTT6                                                                                            |
| 285 | 1,2,3,4,6,2<br>2,23,24 | 5,7,8,17,1<br>8,19,20,21      | 20         | D3ZUC6,P00507,P02783,P06760,P07150,P09656,P13676,P22006,P23593,P30919,P47727,P55159,P62804,Q09030,Q4KLZ6,Q63532,Q6P6R2,Q99MH3,Q9QX74,Q9WTT6 |
| 286 | 1,2,3,4,7,8<br>,17,18  | 5,6,19,20,<br>21,22,23,2<br>4 | 11         | G3V686,O70417,O70594,P01681,P20766,P97580,P97615,Q30KJ2,Q63598,Q64093,Q811M5                                                                |
| 287 | 1,2,3,4,7,8<br>,17,19  | 5,6,18,20,<br>21,22,23,2<br>4 | 8          | iRT-Kit_WR_fusion,O70417,O70594,P01681,P20646,P97580,Q30KJ2,Q66H69                                                                          |
| 288 | 1,2,3,4,7,8<br>,17,20  | 5,6,18,19,<br>21,22,23,2<br>4 | 14         | D4A5U3,O70417,P06911,P13676,P19223,P97580,Q10758,Q4FZU2,Q4G075,Q5GRG2,Q62946,Q6IFW6,Q6IG02,Q811M5                                           |
| 289 | 1,2,3,4,7,8<br>,17,21  | 5,6,18,19,<br>20,22,23,2<br>4 | iRT-<br>12 | Kit_WR_fusion,O70594,P22006,P97580,Q00715,Q4FZU2,Q63598,Q6IFU8,Q6IFW6,Q6IG02,Q6IMF3,Q811M5                                                  |
| 290 | 1,2,3,4,7,8<br>,17,22  | 5,6,18,19,<br>20,21,23,2<br>4 | 6          | O70417,P01681,P23593,P35280,P97580,Q30KJ2                                                                                                   |
| 291 | 1,2,3,4,7,8<br>,17,23  | 5,6,18,19,<br>20,21,22,2<br>4 | 8          | O70594,P01681,P20761,P46720,P46844,P97580,Q63598,Q64093                                                                                     |
| 292 | 1,2,3,4,7,8<br>,17,24  | 5,6,18,19,<br>20,21,22,2<br>3 | 12         | O70417,O70594,P01681,P23593,P46844,P97580,Q4FZU2,Q63598,Q64093,Q6IFW6,Q6IG02,Q811M5                                                         |
| 293 | 1,2,3,4,7,8<br>,18,19  | 5,6,17,20,<br>21,22,23,2<br>4 | 8          | A0JPJ7,P01681,P20766,P97580,P97615,Q30KJ2,Q66H69,Q9WTTW7                                                                                    |
| 294 | 1,2,3,4,7,8<br>,18,20  | 5,6,17,19,<br>21,22,23,2<br>4 | 11         | D4A5U3,O70417,P02780,P06911,P50280,P97580,P97615,Q4G075,Q5GRG2,Q811M5,Q91ZS3                                                                |
| 295 | 1,2,3,4,7,8<br>,18,21  | 5,6,17,19,<br>20,22,23,2<br>4 | 7          | O89117,P02625,P46844,P97580,Q00715,Q811M5,Q91ZS3                                                                                            |
| 296 | 1,2,3,4,7,8<br>,18,22  | 5,6,17,19,<br>20,21,23,2<br>4 | 6          | P23593,P35280,P97580,Q30KJ2,Q63618,Q6AYQ8                                                                                                   |

|     |                       |                               |                                                                                                                                                 |
|-----|-----------------------|-------------------------------|-------------------------------------------------------------------------------------------------------------------------------------------------|
| 297 | 1,2,3,4,7,8<br>,18,23 | 5,6,17,19,<br>20,21,22,2<br>4 | 13 O70594,P20761,P20762,P20766,P46844,P97580,Q30KJ2,Q3ZAV1,Q63424,Q63598,Q64093,Q6AYQ8,Q9WTW7                                                   |
| 298 | 1,2,3,4,7,8<br>,18,24 | 5,6,17,19,<br>20,21,22,2<br>3 | 9 P02625,P20766,P46844,P97580,P97615,Q3ZAV1,Q63598,Q64093,Q6AYQ8                                                                                |
| 299 | 1,2,3,4,7,8<br>,19,20 | 5,6,17,18,<br>21,22,23,2<br>4 | D4A5U3,iRT-<br>15 Kit_WR_fusion,O70417,P01681,P02780,P06911,P10758,P47967,P50280,P80299,P97580,Q4G075,Q5I0D1,Q66H69,Q6IG02                      |
| 300 | 1,2,3,4,7,8<br>,19,21 | 5,6,17,18,<br>20,22,23,2<br>4 | 9 B0BNN3,iRT-Kit_WR_fusion,P01681,P04355,P11883,P97580,Q00715,Q66H69,Q6IFW6                                                                     |
| 301 | 1,2,3,4,7,8<br>,19,22 | 5,6,17,18,<br>20,21,23,2<br>4 | 7 iRT-Kit_WR_fusion,P01681,P35280,P80299,P97580,Q30KJ2,Q66H69                                                                                   |
| 302 | 1,2,3,4,7,8<br>,19,23 | 5,6,17,18,<br>20,21,22,2<br>4 | 7 iRT-Kit_WR_fusion,P01681,P10758,P20761,P97580,Q66H69,Q6AYQ8                                                                                   |
| 303 | 1,2,3,4,7,8<br>,19,24 | 5,6,17,18,<br>20,21,22,2<br>3 | 7 iRT-Kit_WR_fusion,O54728,P01681,P97580,Q66H69,Q6AYQ8,Q6IFW6                                                                                   |
| 304 | 1,2,3,4,7,8<br>,20,21 | 5,6,17,18,<br>19,22,23,2<br>4 | D4A5U3,iRT-<br>18 Kit_WR_fusion,P02780,P05964,P06911,P19629,P47967,Q00715,Q10758,Q4G075,Q62946,Q63493,Q6IFU8,Q6IFW6,Q6IG02,Q811M5,Q812E4,Q9JHB9 |
| 305 | 1,2,3,4,7,8<br>,20,22 | 5,6,17,18,<br>19,21,23,2<br>4 | 10 D4A5U3,O70417,P02780,P06911,P23593,P35280,P80299,P97580,Q30KJ2,Q4G075                                                                        |
| 306 | 1,2,3,4,7,8<br>,20,23 | 5,6,17,18,<br>19,21,22,2<br>4 | 6 D4A5U3,P06911,P10758,P20761,Q4G075,Q6IG02                                                                                                     |
| 307 | 1,2,3,4,7,8<br>,20,24 | 5,6,17,18,<br>19,21,22,2<br>3 | 11 D4A5U3,O70417,P02780,P06911,Q4G075,Q6IFU8,Q6IFW6,Q6IG02,Q811M5,Q812E4,Q9JHB9                                                                 |
| 308 | 1,2,3,4,7,8<br>,21,22 | 5,6,17,18,<br>19,20,23,2<br>4 | 7 iRT-Kit_WR_fusion,P11883,P23593,P35280,P97580,Q30KJ2,Q6IFW6                                                                                   |
| 309 | 1,2,3,4,7,8<br>,21,23 | 5,6,17,18,<br>19,20,22,2<br>4 | 6 iRT-Kit_WR_fusion,O70594,P20761,P46844,Q63598,Q6IFW6                                                                                          |

|     |                        |                               |                                                                                                    |
|-----|------------------------|-------------------------------|----------------------------------------------------------------------------------------------------|
| 310 | 1,2,3,4,7,8<br>,21,24  | 5,6,17,18,<br>19,20,22,2<br>3 | iRT-<br>11 Kit_WR_fusion,P02625,P02761,P11883,P46844,Q4FZU2,Q63598,Q6IFU8,Q6IFW6,Q6IG02,Q6IMF<br>3 |
| 311 | 1,2,3,4,7,8<br>,22,23  | 5,6,17,18,<br>19,20,21,2<br>4 | 8 P01681,P20761,P23593,P35280,P80299,P97580,Q30KJ2,Q6AYQ8                                          |
| 312 | 1,2,3,4,7,8<br>,22,24  | 5,6,17,18,<br>19,20,21,2<br>3 | 7 P23593,P35280,P97580,Q30KJ2,Q6AYQ8,Q6IFW6,Q6P6R2                                                 |
| 313 | 1,2,3,4,7,8<br>,23,24  | 5,6,17,18,<br>19,20,21,2<br>2 | 10 P20761,P46720,P46844,Q3ZAV1,Q5PQL7,Q63598,Q64093,Q6AYQ8,Q6IFW6,Q6P6R2                           |
| 314 | 1,2,3,4,7,1<br>7,18,19 | 5,6,8,20,2<br>1,22,23,24      | 1 P20766                                                                                           |
| 315 | 1,2,3,4,7,1<br>7,18,20 | 5,6,8,19,2<br>1,22,23,24      | 3 P19223,Q811M5,Q8K1G0                                                                             |
| 316 | 1,2,3,4,7,1<br>7,18,21 | 5,6,8,19,2<br>0,22,23,24      | 1 Q811M5                                                                                           |
| 317 | 1,2,3,4,7,1<br>7,18,22 | 5,6,8,19,2<br>0,21,23,24      | 1 P80299                                                                                           |
| 318 | 1,2,3,4,7,1<br>7,18,23 | 5,6,8,19,2<br>0,21,22,24      | 1 O70594                                                                                           |
| 319 | 1,2,3,4,7,1<br>7,18,24 | 5,6,8,19,2<br>0,21,22,23      | 2 P19218,P20766                                                                                    |
| 320 | 1,2,3,4,7,1<br>7,19,20 | 5,6,8,18,2<br>1,22,23,24      | 5 P10758,P19223,P20646,P80299,Q811M5                                                               |
| 321 | 1,2,3,4,7,1<br>7,19,21 | 5,6,8,18,2<br>0,22,23,24      | 3 P80299,Q9R168,Q9WVK7                                                                             |
| 322 | 1,2,3,4,7,1<br>7,19,22 | 5,6,8,18,2<br>0,21,23,24      | 2 P80299,Q9R168                                                                                    |
| 323 | 1,2,3,4,7,1<br>7,19,23 | 5,6,8,18,2<br>0,21,22,24      | 1 P80299                                                                                           |
| 324 | 1,2,3,4,7,1<br>7,19,24 | 5,6,8,18,2<br>0,21,22,23      | 1 P54921                                                                                           |
| 325 | 1,2,3,4,7,1<br>7,20,21 | 5,6,8,18,1<br>9,22,23,24      | 3 P19223,P80299,Q811M5                                                                             |
| 326 | 1,2,3,4,7,1<br>7,20,22 | 5,6,8,18,1<br>9,21,23,24      | 2 P19223,P80299                                                                                    |
| 327 | 1,2,3,4,7,1<br>7,20,23 | 5,6,8,18,1<br>9,21,22,24      | 4 P10758,P19223,P80299,Q9QYP1                                                                      |



|     |                        |                          |                                      |
|-----|------------------------|--------------------------|--------------------------------------|
| 328 | 1,2,3,4,7,1<br>7,20,24 | 5,6,8,18,1<br>9,21,22,23 | 3 P19223,Q811M5,Q9QYP1               |
| 329 | 1,2,3,4,7,1<br>7,21,22 | 5,6,8,18,1<br>9,20,23,24 | 2 P80299,Q9R168                      |
| 330 | 1,2,3,4,7,1<br>7,21,23 | 5,6,8,18,1<br>9,20,22,24 | 1 Q9R168                             |
| 331 | 1,2,3,4,7,1<br>7,21,24 | 5,6,8,18,1<br>9,20,22,23 | 4 P36860,Q6AY61,Q811M5,Q9R168        |
| 332 | 1,2,3,4,7,1<br>7,22,23 | 5,6,8,18,1<br>9,20,21,24 | 2 P80299,Q9R168                      |
| 333 | 1,2,3,4,7,1<br>7,22,24 | 5,6,8,18,1<br>9,20,21,23 | 1 Q9R168                             |
| 334 | 1,2,3,4,7,1<br>7,23,24 | 5,6,8,18,1<br>9,20,21,22 | 1 Q5PQL7                             |
| 335 | 1,2,3,4,7,1<br>8,19,20 | 5,6,8,17,2<br>1,22,23,24 | 5 P10758,P47967,P80299,P97840,Q5I0D1 |
| 336 | 1,2,3,4,7,1<br>8,19,21 | 5,6,8,17,2<br>0,22,23,24 | 1 P80299                             |
| 337 | 1,2,3,4,7,1<br>8,19,22 | 5,6,8,17,2<br>0,21,23,24 | 2 P80299,Q6AYQ8                      |
| 338 | 1,2,3,4,7,1<br>8,19,23 | 5,6,8,17,2<br>0,21,22,24 | 4 P10758,P20766,P80299,Q6AYQ8        |
| 339 | 1,2,3,4,7,1<br>8,19,24 | 5,6,8,17,2<br>0,21,22,23 | 2 P20766,Q6AYQ8                      |
| 340 | 1,2,3,4,7,1<br>8,20,21 | 5,6,8,17,1<br>9,22,23,24 | 4 P47967,P80299,P97840,Q811M5        |
| 341 | 1,2,3,4,7,1<br>8,20,22 | 5,6,8,17,1<br>9,21,23,24 | 1 P80299                             |
| 342 | 1,2,3,4,7,1<br>8,20,23 | 5,6,8,17,1<br>9,21,22,24 | 3 P10758,P80299,Q9QYP1               |
| 343 | 1,2,3,4,7,1<br>8,20,24 | 5,6,8,17,1<br>9,21,22,23 | 1 Q9QYP1                             |
| 344 | 1,2,3,4,7,1<br>8,21,22 | 5,6,8,17,1<br>9,20,23,24 | 2 P23739,P80299                      |
| 345 | 1,2,3,4,7,1<br>8,21,23 | 5,6,8,17,1<br>9,20,22,24 | 2 O89117,P80299                      |
| 346 | 1,2,3,4,7,1<br>8,21,24 | 5,6,8,17,1<br>9,20,22,23 | 1 O89117                             |
| 347 | 1,2,3,4,7,1<br>8,22,23 | 5,6,8,17,1<br>9,20,21,24 | 4 P30120,P80299,Q6AYQ8,Q6P6R2        |

|     |                        |                          |                                      |
|-----|------------------------|--------------------------|--------------------------------------|
| 348 | 1,2,3,4,7,1<br>8,22,24 | 5,6,8,17,1<br>9,20,21,23 | 3 P06760,Q6AYQ8,Q6P6R2               |
| 349 | 1,2,3,4,7,1<br>8,23,24 | 5,6,8,17,1<br>9,20,21,22 | 5 O89117,P06760,P20766,Q6AYQ8,Q6P6R2 |
| 350 | 1,2,3,4,7,1<br>9,20,21 | 5,6,8,17,1<br>8,22,23,24 | 5 P05369,P10758,P47967,P80299,Q5I0D1 |
| 351 | 1,2,3,4,7,1<br>9,20,22 | 5,6,8,17,1<br>8,21,23,24 | 2 P10758,P80299                      |
| 352 | 1,2,3,4,7,1<br>9,20,23 | 5,6,8,17,1<br>8,21,22,24 | 2 P10758,P80299                      |
| 353 | 1,2,3,4,7,1<br>9,20,24 | 5,6,8,17,1<br>8,21,22,23 | 2 P10758,P80299                      |
| 354 | 1,2,3,4,7,1<br>9,21,22 | 5,6,8,17,1<br>8,20,23,24 | 3 B0BNN3,P80299,Q9R168               |
| 355 | 1,2,3,4,7,1<br>9,21,23 | 5,6,8,17,1<br>8,20,22,24 | 2 P10758,P80299                      |
| 356 | 1,2,3,4,7,1<br>9,21,24 | 5,6,8,17,1<br>8,20,22,23 | 2 B0BNN3,Q62761;Q62762;Q62763        |
| 357 | 1,2,3,4,7,1<br>9,22,23 | 5,6,8,17,1<br>8,20,21,24 | 2 P80299,Q6AYQ8                      |
| 358 | 1,2,3,4,7,1<br>9,22,24 | 5,6,8,17,1<br>8,20,21,23 | 2 P80299,Q6AYQ8                      |
| 359 | 1,2,3,4,7,1<br>9,23,24 | 5,6,8,17,1<br>8,20,21,22 | 2 P10758,Q6AYQ8                      |
| 360 | 1,2,3,4,7,2<br>0,21,22 | 5,6,8,17,1<br>8,19,23,24 | 2 P17046,P80299                      |
| 361 | 1,2,3,4,7,2<br>0,21,23 | 5,6,8,17,1<br>8,19,22,24 | 3 P08649,P10758,P80299               |
| 362 | 1,2,3,4,7,2<br>0,21,24 | 5,6,8,17,1<br>8,19,22,23 | 3 P02761,P08649,Q811M5               |
| 363 | 1,2,3,4,7,2<br>0,22,23 | 5,6,8,17,1<br>8,19,21,24 | 2 P10758,P80299                      |
| 364 | 1,2,3,4,7,2<br>0,22,24 | 5,6,8,17,1<br>8,19,21,23 | 2 P80299,Q9QX74                      |
| 365 | 1,2,3,4,7,2<br>0,23,24 | 5,6,8,17,1<br>8,19,21,22 | 2 P10758,Q9QYP1                      |
| 366 | 1,2,3,4,7,2<br>1,22,23 | 5,6,8,17,1<br>8,19,20,24 | 2 P80299,Q9R168                      |
| 367 | 1,2,3,4,7,2<br>1,22,24 | 5,6,8,17,1<br>8,19,20,23 | 3 P02761,P80299,Q9R168               |

|     |                        |                          |   |                                                         |
|-----|------------------------|--------------------------|---|---------------------------------------------------------|
| 368 | 1,2,3,4,7,2<br>1,23,24 | 5,6,8,17,1<br>8,19,20,22 | 3 | P02761,P08649,P18297                                    |
| 369 | 1,2,3,4,7,2<br>2,23,24 | 5,6,8,17,1<br>8,19,20,21 | 6 | B0LT89,P06760,P80299,Q6AYQ8,Q6P6R2,Q9QX74               |
| 370 | 1,2,3,4,8,1<br>7,18,19 | 5,6,7,20,2<br>1,22,23,24 | 7 | G3V686,P01681,P01835,P97580,P97615,Q30KJ2,Q66H69        |
| 371 | 1,2,3,4,8,1<br>7,18,20 | 5,6,7,19,2<br>1,22,23,24 | 7 | D4A5U3,G3V686,P19223,P97580,Q10758,Q6IG02,Q811M5        |
| 372 | 1,2,3,4,8,1<br>7,18,21 | 5,6,7,19,2<br>0,22,23,24 | 3 | P02625,P97580,Q811M5                                    |
| 373 | 1,2,3,4,8,1<br>7,18,22 | 5,6,7,19,2<br>0,21,23,24 | 4 | G3V686,P23593,P97580,Q30KJ2                             |
| 374 | 1,2,3,4,8,1<br>7,18,23 | 5,6,7,19,2<br>0,21,22,24 | 4 | O70594,P01681,P97580,Q30KJ2                             |
| 375 | 1,2,3,4,8,1<br>7,18,24 | 5,6,7,19,2<br>0,21,22,23 | 1 | P97580                                                  |
| 376 | 1,2,3,4,8,1<br>7,19,20 | 5,6,7,18,2<br>1,22,23,24 | 8 | D4A5U3,P01681,P13676,P19223,P97580,Q10758,Q6IG02,Q811M5 |
| 377 | 1,2,3,4,8,1<br>7,19,21 | 5,6,7,18,2<br>0,22,23,24 | 6 | B0BNN3,P01681,P22006,P97580,Q66H69,Q9WVK7               |
| 378 | 1,2,3,4,8,1<br>7,19,22 | 5,6,7,18,2<br>0,21,23,24 | 3 | P01681,P97580,Q30KJ2                                    |
| 379 | 1,2,3,4,8,1<br>7,19,23 | 5,6,7,18,2<br>0,21,22,24 | 2 | P01681,P97580                                           |
| 380 | 1,2,3,4,8,1<br>7,19,24 | 5,6,7,18,2<br>0,21,22,23 | 3 | O54728,P01681,P97580                                    |
| 381 | 1,2,3,4,8,1<br>7,20,21 | 5,6,7,18,1<br>9,22,23,24 | 8 | D4A5U3,P00762,P19223,Q10758,Q6IFU8,Q6IFW6,Q6IG02,Q811M5 |
| 382 | 1,2,3,4,8,1<br>7,20,22 | 5,6,7,18,1<br>9,21,23,24 | 6 | D4A5U3,O70417,P19223,P97580,Q30KJ2,Q6IG02               |
| 383 | 1,2,3,4,8,1<br>7,20,23 | 5,6,7,18,1<br>9,21,22,24 | 6 | D4A5U3,P10758,P19223,P36376,Q10758,Q6IG02               |
| 384 | 1,2,3,4,8,1<br>7,20,24 | 5,6,7,18,1<br>9,21,22,23 | 7 | D4A5U3,P19223,Q10758,Q4FZU2,Q6IFW6,Q6IG02,Q811M5        |
| 385 | 1,2,3,4,8,1<br>7,21,22 | 5,6,7,18,1<br>9,20,23,24 | 2 | P97580,Q30KJ2                                           |
| 386 | 1,2,3,4,8,1<br>7,21,23 | 5,6,7,18,1<br>9,20,22,24 | 2 | P22006,Q6IFW6                                           |
| 387 | 1,2,3,4,8,1<br>7,21,24 | 5,6,7,18,1<br>9,20,22,23 | 6 | P00762,Q4FZU2,Q6IFU8,Q6IFW6,Q6IG02,Q811M5               |

|     |                        |                          |   |                                                  |
|-----|------------------------|--------------------------|---|--------------------------------------------------|
| 388 | 1,2,3,4,8,1<br>7,22,23 | 5,6,7,18,1<br>9,20,21,24 | 4 | P01681,P23593,P97580,Q30KJ2                      |
| 389 | 1,2,3,4,8,1<br>7,22,24 | 5,6,7,18,1<br>9,20,21,23 | 3 | P23593,P97580,Q30KJ2                             |
| 390 | 1,2,3,4,8,1<br>7,23,24 | 5,6,7,18,1<br>9,20,21,22 | 2 | Q5PQL7,Q6IFW6                                    |
| 391 | 1,2,3,4,8,1<br>8,19,20 | 5,6,7,17,2<br>1,22,23,24 | 4 | P97580,P97615,Q63475,Q9R168                      |
| 392 | 1,2,3,4,8,1<br>8,19,21 | 5,6,7,17,2<br>0,22,23,24 | 2 | P97580,Q66H69                                    |
| 393 | 1,2,3,4,8,1<br>8,19,22 | 5,6,7,17,2<br>0,21,23,24 | 3 | P15399,P97580,Q30KJ2                             |
| 394 | 1,2,3,4,8,1<br>8,19,23 | 5,6,7,17,2<br>0,21,22,24 | 4 | P01681,P97580,Q30KJ2,Q9Z0J6                      |
| 395 | 1,2,3,4,8,1<br>8,19,24 | 5,6,7,17,2<br>0,21,22,23 | 2 | O54728,P97580                                    |
| 396 | 1,2,3,4,8,1<br>8,20,21 | 5,6,7,17,1<br>9,22,23,24 | 6 | D4A5U3,P00762,P25809,Q10758,Q6IG02,Q811M5        |
| 397 | 1,2,3,4,8,1<br>8,20,22 | 5,6,7,17,1<br>9,21,23,24 | 3 | P15399,P97580,Q30KJ2                             |
| 398 | 1,2,3,4,8,1<br>8,20,23 | 5,6,7,17,1<br>9,21,22,24 | 6 | P05539,P10758,P36376,P54921,Q10758,Q9R168        |
| 399 | 1,2,3,4,8,1<br>8,20,24 | 5,6,7,17,1<br>9,21,22,23 | 2 | Q10758,Q6IG02                                    |
| 400 | 1,2,3,4,8,1<br>8,21,22 | 5,6,7,17,1<br>9,20,23,24 | 4 | P02625,P54921,P97580,Q30KJ2                      |
| 401 | 1,2,3,4,8,1<br>8,21,23 | 5,6,7,17,1<br>9,20,22,24 | 1 | P54921                                           |
| 402 | 1,2,3,4,8,1<br>8,21,24 | 5,6,7,17,1<br>9,20,22,23 | 3 | O89117,P02625,Q6IFW6                             |
| 403 | 1,2,3,4,8,1<br>8,22,23 | 5,6,7,17,1<br>9,20,21,24 | 4 | P54921,P97580,Q30KJ2,Q99MH3                      |
| 404 | 1,2,3,4,8,1<br>8,22,24 | 5,6,7,17,1<br>9,20,21,23 | 4 | P23593,P97580,Q30KJ2,Q6P6R2                      |
| 405 | 1,2,3,4,8,1<br>8,23,24 | 5,6,7,17,1<br>9,20,21,22 | 1 | P05539                                           |
| 406 | 1,2,3,4,8,1<br>9,20,21 | 5,6,7,17,1<br>8,22,23,24 | 7 | B0BNN3,D4A5U3,P00762,Q10758,Q66H69,Q6IG02,Q9JI85 |
| 407 | 1,2,3,4,8,1<br>9,20,22 | 5,6,7,17,1<br>8,21,23,24 | 3 | P15399,P97580,Q30KJ2                             |

|     |                         |                          |   |                                                                |
|-----|-------------------------|--------------------------|---|----------------------------------------------------------------|
| 408 | 1,2,3,4,8,1<br>9,20,23  | 5,6,7,17,1<br>8,21,22,24 | 2 | P10758,P36376                                                  |
| 409 | 1,2,3,4,8,1<br>9,20,24  | 5,6,7,17,1<br>8,21,22,23 | 2 | O54728,Q6IG02                                                  |
| 410 | 1,2,3,4,8,1<br>9,21,22  | 5,6,7,17,1<br>8,20,23,24 | 4 | B0BNN3,P30919,P97580,Q30KJ2                                    |
| 411 | 1,2,3,4,8,1<br>9,21,23  | 5,6,7,17,1<br>8,20,22,24 | 1 | Q9Z0J6                                                         |
| 412 | 1,2,3,4,8,1<br>9,21,24  | 5,6,7,17,1<br>8,20,22,23 | 6 | B0BNN3,O54728,P30919,Q10743,Q66H69,Q6IFW6                      |
| 413 | 1,2,3,4,8,1<br>9,22,23  | 5,6,7,17,1<br>8,20,21,24 | 4 | P00507,P01681,P97580,Q30KJ2                                    |
| 414 | 1,2,3,4,8,1<br>9,22,24  | 5,6,7,17,1<br>8,20,21,23 | 6 | O54728,P00507,P15399,P30919,P97580,Q30KJ2                      |
| 415 | 1,2,3,4,8,1<br>9,23,24  | 5,6,7,17,1<br>8,20,21,22 | 3 | O54728,P01681,Q9Z0J6                                           |
| 416 | 1,2,3,4,8,2<br>0,21,22  | 5,6,7,17,1<br>8,19,23,24 | 8 | D4A5U3,P00762,P97580,Q10743,Q10758,Q30KJ2,Q6IFW6,Q6IG02        |
| 417 | 1,2,3,4,8,2<br>0,21,23  | 5,6,7,17,1<br>8,19,22,24 | 6 | P00762,P10758,P36376,Q10758,Q6IFW6,Q6IG02                      |
| 418 | 1,2,3,4,8,2<br>0,21,24  | 5,6,7,17,1<br>8,19,22,23 | 9 | D4A5U3,P00762,Q10743,Q10758,Q6IFU8,Q6IFW6,Q6IG02,Q6P6Q2,Q811M5 |
| 419 | 1,2,3,4,8,2<br>0,22,23  | 5,6,7,17,1<br>8,19,21,24 | 6 | P05539,P10758,P36376,P97580,Q30KJ2,Q99MH3                      |
| 420 | 1,2,3,4,8,2<br>0,22,24  | 5,6,7,17,1<br>8,19,21,23 | 6 | P00762,P15399,P97580,Q10743,Q30KJ2,Q6IG02                      |
| 421 | 1,2,3,4,8,2<br>0,23,24  | 5,6,7,17,1<br>8,19,21,22 | 7 | P00762,P05539,P10758,P36376,Q6IFW6,Q6IG02,Q9QYP1               |
| 422 | 1,2,3,4,8,2<br>1,22,23  | 5,6,7,17,1<br>8,19,20,24 | 4 | P30919,P54921,P97580,Q30KJ2                                    |
| 423 | 1,2,3,4,8,2<br>1,22,24  | 5,6,7,17,1<br>8,19,20,23 | 7 | P00762,P02625,P30919,P97580,Q10743,Q30KJ2,Q6IFW6               |
| 424 | 1,2,3,4,8,2<br>1,23,24  | 5,6,7,17,1<br>8,19,20,22 | 4 | P00762,P30919,Q6IFW6,Q6IG02                                    |
| 425 | 1,2,3,4,8,2<br>2,23,24  | 5,6,7,17,1<br>8,19,20,21 | 8 | P00507,P05539,P06760,P23593,P30919,P97580,Q30KJ2,Q6P6R2        |
| 426 | 1,2,3,4,17,<br>18,19,20 | 5,6,7,8,21,<br>22,23,24  | 4 | G3V686,P19223,Q62714,Q8K1G0                                    |
| 427 | 1,2,3,4,17,<br>18,19,21 | 5,6,7,8,20,<br>22,23,24  | 1 | Q9WVK7                                                         |

|     |                                              |                                      |
|-----|----------------------------------------------|--------------------------------------|
| 428 | 1,2,3,4,17, 5,6,7,8,20,<br>18,19,22 21,23,24 | 1 Q06000                             |
| 429 | 1,2,3,4,17, 5,6,7,8,20,<br>18,19,23 21,22,24 | 0                                    |
| 430 | 1,2,3,4,17, 5,6,7,8,20,<br>18,19,24 21,22,23 | 0                                    |
| 431 | 1,2,3,4,17, 5,6,7,8,19,<br>18,20,21 22,23,24 | 2 P19223,Q811M5                      |
| 432 | 1,2,3,4,17, 5,6,7,8,19,<br>18,20,22 21,23,24 | 1 P19223                             |
| 433 | 1,2,3,4,17, 5,6,7,8,19,<br>18,20,23 21,22,24 | 2 P19223,Q9QYP1                      |
| 434 | 1,2,3,4,17, 5,6,7,8,19,<br>18,20,24 21,22,23 | 2 P19223,Q9QYP1                      |
| 435 | 1,2,3,4,17, 5,6,7,8,19,<br>18,21,22 20,23,24 | 0                                    |
| 436 | 1,2,3,4,17, 5,6,7,8,19,<br>18,21,23 20,22,24 | 0                                    |
| 437 | 1,2,3,4,17, 5,6,7,8,19,<br>18,21,24 20,22,23 | 1 P19218                             |
| 438 | 1,2,3,4,17, 5,6,7,8,19,<br>18,22,23 20,21,24 | 5 P06760,P09456,P30120,P55159,Q63617 |
| 439 | 1,2,3,4,17, 5,6,7,8,19,<br>18,22,24 20,21,23 | 4 D3ZUC6,P06760,Q63617,Q9WTT6        |
| 440 | 1,2,3,4,17, 5,6,7,8,19,<br>18,23,24 20,21,22 | 4 P06760,P19218,Q63617,Q9WTT6        |
| 441 | 1,2,3,4,17, 5,6,7,8,18,<br>19,20,21 22,23,24 | 2 P19223,Q9WVK7                      |
| 442 | 1,2,3,4,17, 5,6,7,8,18,<br>19,20,22 21,23,24 | 0                                    |
| 443 | 1,2,3,4,17, 5,6,7,8,18,<br>19,20,23 21,22,24 | 2 P10758,P19223                      |
| 444 | 1,2,3,4,17, 5,6,7,8,18,<br>19,20,24 21,22,23 | 0                                    |
| 445 | 1,2,3,4,17, 5,6,7,8,18,<br>19,21,22 20,23,24 | 2 Q9R168,Q9WVK7                      |
| 446 | 1,2,3,4,17, 5,6,7,8,18,<br>19,21,23 20,22,24 | 0                                    |
| 447 | 1,2,3,4,17, 5,6,7,8,18,<br>19,21,24 20,22,23 | 1 Q9WVK7                             |

|     |                                              |                                                           |
|-----|----------------------------------------------|-----------------------------------------------------------|
| 448 | 1,2,3,4,17, 5,6,7,8,18,<br>19,22,23 20,21,24 | 1 P06760                                                  |
| 449 | 1,2,3,4,17, 5,6,7,8,18,<br>19,22,24 20,21,23 | 2 D3ZUC6,P06760                                           |
| 450 | 1,2,3,4,17, 5,6,7,8,18,<br>19,23,24 20,21,22 | 1 P06760                                                  |
| 451 | 1,2,3,4,17, 5,6,7,8,18,<br>20,21,22 19,23,24 | 1 P19223                                                  |
| 452 | 1,2,3,4,17, 5,6,7,8,18,<br>20,21,23 19,22,24 | 1 P19223                                                  |
| 453 | 1,2,3,4,17, 5,6,7,8,18,<br>20,21,24 19,22,23 | 2 P19223,Q811M5                                           |
| 454 | 1,2,3,4,17, 5,6,7,8,18,<br>20,22,23 19,21,24 | 1 P06760                                                  |
| 455 | 1,2,3,4,17, 5,6,7,8,18,<br>20,22,24 19,21,23 | 1 P06760                                                  |
| 456 | 1,2,3,4,17, 5,6,7,8,18,<br>20,23,24 19,21,22 | 2 P06760,Q9QYP1                                           |
| 457 | 1,2,3,4,17, 5,6,7,8,18,<br>21,22,23 19,20,24 | 1 Q9R168                                                  |
| 458 | 1,2,3,4,17, 5,6,7,8,18,<br>21,22,24 19,20,23 | 1 Q9R168                                                  |
| 459 | 1,2,3,4,17, 5,6,7,8,18,<br>21,23,24 19,20,22 | 0                                                         |
| 460 | 1,2,3,4,17, 5,6,7,8,18,<br>22,23,24 19,20,21 | 8 D3ZUC6,P06760,P06761,P22283,P55159,Q5I0D1,Q63617,Q9WTT6 |
| 461 | 1,2,3,4,18, 5,6,7,8,17,<br>19,20,21 22,23,24 | 0                                                         |
| 462 | 1,2,3,4,18, 5,6,7,8,17,<br>19,20,22 21,23,24 | 0                                                         |
| 463 | 1,2,3,4,18, 5,6,7,8,17,<br>19,20,23 21,22,24 | 1 P10758                                                  |
| 464 | 1,2,3,4,18, 5,6,7,8,17,<br>19,20,24 21,22,23 | 0                                                         |
| 465 | 1,2,3,4,18, 5,6,7,8,17,<br>19,21,22 20,23,24 | 0                                                         |
| 466 | 1,2,3,4,18, 5,6,7,8,17,<br>19,21,23 20,22,24 | 1 Q9Z0J6                                                  |
| 467 | 1,2,3,4,18, 5,6,7,8,17,<br>19,21,24 20,22,23 | 0                                                         |

|     |                                              |                                                                  |
|-----|----------------------------------------------|------------------------------------------------------------------|
| 468 | 1,2,3,4,18, 5,6,7,8,17,<br>19,22,23 20,21,24 | 3 P06760,P09456,Q9WTT6                                           |
| 469 | 1,2,3,4,18, 5,6,7,8,17,<br>19,22,24 20,21,23 | 3 P06760,Q9QX74,Q9WTT6                                           |
| 470 | 1,2,3,4,18, 5,6,7,8,17,<br>19,23,24 20,21,22 | 4 P06760,Q9QX74,Q9WTT6,Q9Z0J6                                    |
| 471 | 1,2,3,4,18, 5,6,7,8,17,<br>20,21,22 19,23,24 | 0                                                                |
| 472 | 1,2,3,4,18, 5,6,7,8,17,<br>20,21,23 19,22,24 | 1 P10758                                                         |
| 473 | 1,2,3,4,18, 5,6,7,8,17,<br>20,21,24 19,22,23 | 0                                                                |
| 474 | 1,2,3,4,18, 5,6,7,8,17,<br>20,22,23 19,21,24 | 3 P06760,P54921,Q9QX74                                           |
| 475 | 1,2,3,4,18, 5,6,7,8,17,<br>20,22,24 19,21,23 | 4 P06760,P21674,P50115,Q9QX74                                    |
| 476 | 1,2,3,4,18, 5,6,7,8,17,<br>20,23,24 19,21,22 | 5 P06760,P10758,Q5QE79,Q9QX74,Q9QYP1                             |
| 477 | 1,2,3,4,18, 5,6,7,8,17,<br>21,22,23 19,20,24 | 2 P54921,Q9WTT6                                                  |
| 478 | 1,2,3,4,18, 5,6,7,8,17,<br>21,22,24 19,20,23 | 2 Q8CJD3,Q9WTT6                                                  |
| 479 | 1,2,3,4,18, 5,6,7,8,17,<br>21,23,24 19,20,22 | 2 O89117,Q9WTT6                                                  |
| 480 | 1,2,3,4,18, 5,6,7,8,17,<br>22,23,24 19,20,21 | 9 P06760,P06761,P13676,P55159,Q63617,Q6AYQ8,Q6P6R2,Q9QX74,Q9WTT6 |
| 481 | 1,2,3,4,19, 5,6,7,8,17,<br>20,21,22 18,23,24 | 0                                                                |
| 482 | 1,2,3,4,19, 5,6,7,8,17,<br>20,21,23 18,22,24 | 1 P10758                                                         |
| 483 | 1,2,3,4,19, 5,6,7,8,17,<br>20,21,24 18,22,23 | 1 Q64335                                                         |
| 484 | 1,2,3,4,19, 5,6,7,8,17,<br>20,22,23 18,21,24 | 3 P06760,P10758,Q9QX74                                           |
| 485 | 1,2,3,4,19, 5,6,7,8,17,<br>20,22,24 18,21,23 | 2 P06760,Q9QX74                                                  |
| 486 | 1,2,3,4,19, 5,6,7,8,17,<br>20,23,24 18,21,22 | 4 P06760,P10758,Q9QX74,Q9QYP1                                    |
| 487 | 1,2,3,4,19, 5,6,7,8,17,<br>21,22,23 18,20,24 | 0                                                                |



|     |                                                  |                                                                                                                                                                                                         |
|-----|--------------------------------------------------|---------------------------------------------------------------------------------------------------------------------------------------------------------------------------------------------------------|
| 488 | 1,2,3,4,19, 5,6,7,8,17,<br>21,22,24 18,20,23     | 3 B0BNN3,P30919,Q64335                                                                                                                                                                                  |
| 489 | 1,2,3,4,19, 5,6,7,8,17,<br>21,23,24 18,20,22     | 2 Q64335,Q9Z0J6                                                                                                                                                                                         |
| 490 | 1,2,3,4,19, 5,6,7,8,17,<br>22,23,24 18,20,21     | 5 P00507,P06760,Q6P6R2,Q9QX74,Q9WTT6                                                                                                                                                                    |
| 491 | 1,2,3,4,20, 5,6,7,8,17,<br>21,22,23 18,19,24     | 1 P09656                                                                                                                                                                                                |
| 492 | 1,2,3,4,20, 5,6,7,8,17,<br>21,22,24 18,19,23     | 1 Q9QX74                                                                                                                                                                                                |
| 493 | 1,2,3,4,20, 5,6,7,8,17,<br>21,23,24 18,19,22     | 3 P10758,Q9QX74,Q9QYP1                                                                                                                                                                                  |
| 494 | 1,2,3,4,20, 5,6,7,8,17,<br>22,23,24 18,19,21     | 6 P06760,P07150,Q5QE79,Q6P6R2,Q9QX74,Q9QYP1                                                                                                                                                             |
| 495 | 1,2,3,4,21, 5,6,7,8,17,<br>22,23,24 18,19,20     | 5 P07150,P13676,P30919,Q9QX74,Q9WTT6                                                                                                                                                                    |
| 496 | 1,2,3,5,6,7 4,18,19,20<br>,8,17 ,21,22,23,<br>24 | iRT-<br>14 Kit_WR_fusion,O70594,P23593,P50115,P50116,P52590,P97580,Q05702,Q09030,Q6IFU7,Q6IG05,Q6IMF3,Q91XN4,Q9QZQ5                                                                                     |
| 497 | 1,2,3,5,6,7 4,17,19,20<br>,8,18 ,21,22,23,<br>24 | iRT-<br>20 Kit_WR_fusion,O54800;Q5DWV2,O70594,P20766,P23593,P31044,P38918,P50115,P50116,P52590,P80202,P97580,Q05702,Q09030,Q6IG05,Q91XN4,Q91ZS3,Q9JJ50,Q9QZQ5,Q9Z2L0                                    |
| 498 | 1,2,3,5,6,7 4,17,18,20<br>,8,19 ,21,22,23,<br>24 | iRT-<br>16 Kit_WR_fusion,O70594,P19629,P31044,P42854,P50115,P50116,P52590,P97580,Q05702,Q09030,Q4FZU4,Q66H69,Q6IG05,Q6IMF3,Q9Z2L0                                                                       |
| 499 | 1,2,3,5,6,7 4,17,18,19<br>,8,20 ,21,22,23,<br>24 | iRT-<br>23 Kit_WR_fusion,P06911,P12020,P19629,P23593,P25031,P31044,P42854,P47967,P50115,P50116,P50280,P52590,Q05702,Q09030,Q4G075,Q5GRG2,Q5I0D1,Q6IFU7,Q6IG05,Q6IMF3,Q91XN4,Q91ZS3                      |
| 500 | 1,2,3,5,6,7 4,17,18,19<br>,8,21 ,20,22,23,<br>24 | iRT-<br>26 Kit_WR_fusion,O70594,P02631,P04762,P08937,P11883,P18757,P19629,P30919,P36860,P46844,P47967,P50115,P50116,P52590,Q00715,Q05702,Q09030,Q62714,Q6IFU7,Q6IFW6,Q6IG05,Q6IMF3,Q91XN4,Q91ZS3,Q9JJ50 |
| 501 | 1,2,3,5,6,7 4,17,18,19<br>,8,22 ,20,21,23,<br>24 | iRT-<br>21 Kit_WR_fusion,O54858,O70594,P19629,P23593,P35280,P50115,P50116,P52590,P80202,P97580,Q05702,Q09030,Q30KJ2,Q4FZU4,Q62714,Q6IG05,Q6P6R2,Q91XN4,Q91ZS3,Q9Z2L0                                    |
| 502 | 1,2,3,5,6,7 4,17,18,19<br>,8,23 ,20,21,22,<br>24 | iRT-<br>23 Kit_WR_fusion,O70594,P19629,P23593,P23785,P38918,P42854,P46844,P50115,P50116,P52590,P80202,Q05702,Q09030,Q62714,Q63532,Q6IG05,Q6IMF3,Q91XN4,Q91ZS3,Q99MH3,Q9JJ50,Q9Z2L0                      |

|     |                       |                                |                                                                                                                                                            |
|-----|-----------------------|--------------------------------|------------------------------------------------------------------------------------------------------------------------------------------------------------|
| 503 | 1,2,3,5,6,7<br>,8,24  | 4,17,18,19<br>,20,21,22,<br>23 | iRT-<br>19 Kit_WR_fusion,O70594,P23593,P30919,P36860,P46844,P50115,P50116,P52590,P80202,Q05702,<br>Q09030,Q62714,Q6IFW6,Q6IG05,Q6IMF3,Q6P6R2,Q91XN4,Q91ZS3 |
| 504 | 1,2,3,5,6,7<br>,17,18 | 4,8,19,20,<br>21,22,23,2<br>4  | 8 O54800;Q5DWV2,O70594,P20766,P50116,P52590,Q09030,Q6AY61,Q9Z2L0                                                                                           |
| 505 | 1,2,3,5,6,7<br>,17,19 | 4,8,18,20,<br>21,22,23,2<br>4  | 4 O70594,P50116,P52590,Q6AY61                                                                                                                              |
| 506 | 1,2,3,5,6,7<br>,17,20 | 4,8,18,19,<br>21,22,23,2<br>4  | 5 P50116,P52590,P55281,P63029,Q6AY61                                                                                                                       |
| 507 | 1,2,3,5,6,7<br>,17,21 | 4,8,18,19,<br>20,22,23,2<br>4  | 9 O70594,P04762,P05539,P36860,P50116,P52590,Q09030,Q6AY61,Q9R168                                                                                           |
| 508 | 1,2,3,5,6,7<br>,17,22 | 4,8,18,19,<br>20,21,23,2<br>4  | 7 P01946,P02091,P23593,P52590,Q09030,Q9R168,Q9Z2L0                                                                                                         |
| 509 | 1,2,3,5,6,7<br>,17,23 | 4,8,18,19,<br>20,21,22,2<br>4  | 6 O70594,P50116,P52590,Q09030,Q99MH3,Q9Z2L0                                                                                                                |
| 510 | 1,2,3,5,6,7<br>,17,24 | 4,8,18,19,<br>20,21,22,2<br>3  | 6 O70594,P01039,P36860,P52590,Q09030,Q6AY61                                                                                                                |
| 511 | 1,2,3,5,6,7<br>,18,19 | 4,8,17,20,<br>21,22,23,2<br>4  | 6 O54800;Q5DWV2,P00762,P20766,P47967,P52590,Q9Z2L0                                                                                                         |
| 512 | 1,2,3,5,6,7<br>,18,20 | 4,8,17,19,<br>21,22,23,2<br>4  | 6 O54800;Q5DWV2,P47967,P52590,Q03191,Q91ZS3,Q9Z2L0                                                                                                         |
| 513 | 1,2,3,5,6,7<br>,18,21 | 4,8,17,19,<br>20,22,23,2<br>4  | 8 O54800;Q5DWV2,P01835,P36860,P47967,P52590,Q09030,Q91ZS3,Q9JJ50                                                                                           |
| 514 | 1,2,3,5,6,7<br>,18,22 | 4,8,17,19,<br>20,21,23,2<br>4  | 8 O54800;Q5DWV2,P23593,P36374,P52590,Q09030,Q6P6R2,Q91XN4,Q9Z2L0                                                                                           |
| 515 | 1,2,3,5,6,7<br>,18,23 | 4,8,17,19,<br>20,21,22,2<br>4  | 13 O54800;Q5DWV2,O70594,P16636,P20766,P30120,P36374,P52590,Q09030,Q6P6R2,Q91XN4,Q<br>99MH3,Q9JJ50,Q9Z2L0                                                   |

|     |                       |                               |                                                                          |
|-----|-----------------------|-------------------------------|--------------------------------------------------------------------------|
| 516 | 1,2,3,5,6,7<br>,18,24 | 4,8,17,19,<br>20,21,22,2<br>3 | 9 O54800;Q5DWW2,P20766,P52590,Q09030,Q6AY61,Q6P6R2,Q91XN4,Q9JJ50,Q9Z2L0  |
| 517 | 1,2,3,5,6,7<br>,19,20 | 4,8,17,18,<br>21,22,23,2<br>4 | 4 P0DP29;P0DP30;P0DP31,P47967,P52590,Q5I0D1                              |
| 518 | 1,2,3,5,6,7<br>,19,21 | 4,8,17,18,<br>20,22,23,2<br>4 | 3 P47967,P52590,Q6AY61                                                   |
| 519 | 1,2,3,5,6,7<br>,19,22 | 4,8,17,18,<br>20,21,23,2<br>4 | 5 P01946,P52590,Q09030,Q62714,Q9Z2L0                                     |
| 520 | 1,2,3,5,6,7<br>,19,23 | 4,8,17,18,<br>20,21,22,2<br>4 | 6 P42854,P52590,Q09030,Q99MH3,Q9JJ50,Q9Z2L0                              |
| 521 | 1,2,3,5,6,7<br>,19,24 | 4,8,17,18,<br>20,21,22,2<br>3 | 2 P52590,Q6AY61                                                          |
| 522 | 1,2,3,5,6,7<br>,20,21 | 4,8,17,18,<br>19,22,23,2<br>4 | 8 P01835,P19629,P47967,P50116,P52590,Q5I0D1,Q5I0J9,Q6AY61                |
| 523 | 1,2,3,5,6,7<br>,20,22 | 4,8,17,18,<br>19,21,23,2<br>4 | 4 P01835,P52590,Q09030,Q9Z2L0                                            |
| 524 | 1,2,3,5,6,7<br>,20,23 | 4,8,17,18,<br>19,21,22,2<br>4 | 7 P01835,P09656,P52590,Q03191,Q09030,Q99MH3,Q9Z2L0                       |
| 525 | 1,2,3,5,6,7<br>,20,24 | 4,8,17,18,<br>19,21,22,2<br>3 | 3 P01835,P52590,Q6AY61                                                   |
| 526 | 1,2,3,5,6,7<br>,21,22 | 4,8,17,18,<br>19,20,23,2<br>4 | 7 P01835,P01946,P36860,P52590,Q09030,Q62714,Q9R168                       |
| 527 | 1,2,3,5,6,7<br>,21,23 | 4,8,17,18,<br>19,20,22,2<br>4 | 10 O70594,P01835,P09656,P36860,P52590,Q09030,Q62714,Q99MH3,Q9JJ50,Q9Z2L0 |
| 528 | 1,2,3,5,6,7<br>,21,24 | 4,8,17,18,<br>19,20,22,2<br>3 | 9 P01835,P04762,P30919,P36860,P52590,Q09030,Q62714,Q6AY61,Q9JJ50         |

|     |                       |                               |    |                                                                                                              |
|-----|-----------------------|-------------------------------|----|--------------------------------------------------------------------------------------------------------------|
| 529 | 1,2,3,5,6,7<br>,22,23 | 4,8,17,18,<br>19,20,21,2<br>4 | 13 | P02783,P23593,P30120,P36374,P47727,P52590,P60905,Q09030,Q62714,Q6P6R2,Q99MH3,Q9E<br>QS0,Q9Z2L0               |
| 530 | 1,2,3,5,6,7<br>,22,24 | 4,8,17,18,<br>19,20,21,2<br>3 | 6  | P23593,P30919,Q09030,Q62714,Q6P6R2,Q9Z2L0                                                                    |
| 531 | 1,2,3,5,6,7<br>,23,24 | 4,8,17,18,<br>19,20,21,2<br>2 | 9  | P36860,P47727,P52590,Q09030,Q62714,Q6P6R2,Q99MH3,Q9JJ50,Q9Z2L0                                               |
| 532 | 1,2,3,5,6,8<br>,17,18 | 4,7,19,20,<br>21,22,23,2<br>4 | 9  | O54800;Q5DWV2,O70594,P52590,P97580,Q05702,Q09030,Q6IFU7,Q6IG05,Q9Z2L0                                        |
| 533 | 1,2,3,5,6,8<br>,17,19 | 4,7,18,20,<br>21,22,23,2<br>4 | 5  | O70594,P52590,P97580,Q09030,Q6IG05                                                                           |
| 534 | 1,2,3,5,6,8<br>,17,20 | 4,7,18,19,<br>21,22,23,2<br>4 | 15 | P06911,P17559,P25031,P36375,P36376,P52590,P55281,P63029,Q05702,Q09030,Q5GRG2,Q5IO<br>J9,Q6IFU7,Q6IG05,Q6IMF3 |
| 535 | 1,2,3,5,6,8<br>,17,21 | 4,7,18,19,<br>20,22,23,2<br>4 | 8  | O70594,P36860,P52590,Q05702,Q09030,Q6IFU7,Q6IG05,Q6IMF3                                                      |
| 536 | 1,2,3,5,6,8<br>,17,22 | 4,7,18,19,<br>20,21,23,2<br>4 | 10 | P01946,P02091,P23593,P52590,P97580,Q09030,Q30KJ2,Q6IFU7,Q6IG05,Q9Z2L0                                        |
| 537 | 1,2,3,5,6,8<br>,17,23 | 4,7,18,19,<br>20,21,22,2<br>4 | 10 | O70594,P23785,P36376,P52590,Q05702,Q09030,Q6IFU7,Q6IG05,Q99MH3,Q9Z2L0                                        |
| 538 | 1,2,3,5,6,8<br>,17,24 | 4,7,18,19,<br>20,21,22,2<br>3 | 10 | O70594,P01039,P10247,P23593,P52590,Q05702,Q09030,Q6IFU7,Q6IG05,Q6IMF3                                        |
| 539 | 1,2,3,5,6,8<br>,18,19 | 4,7,17,20,<br>21,22,23,2<br>4 | 7  | O54800;Q5DWV2,P52590,P97580,Q05702,Q09030,Q6IG05,Q9Z2L0                                                      |
| 540 | 1,2,3,5,6,8<br>,18,20 | 4,7,17,19,<br>21,22,23,2<br>4 | 12 | O54800;Q5DWV2,P12020,P25031,P52590,Q05702,Q09030,Q5GRG2,Q6IFU7,Q6IG05,Q91ZS3,Q<br>9R168,Q9Z2L0               |
| 541 | 1,2,3,5,6,8<br>,18,21 | 4,7,17,19,<br>20,22,23,2<br>4 | 11 | O54800;Q5DWV2,P52590,Q01984,Q05702,Q09030,Q6IFU7,Q6IG05,Q91XN4,Q91ZS3,Q9JJ50,Q<br>9Z2L0                      |

|     |                       |                               |    |                                                                                                                                   |
|-----|-----------------------|-------------------------------|----|-----------------------------------------------------------------------------------------------------------------------------------|
| 542 | 1,2,3,5,6,8<br>,18,22 | 4,7,17,19,<br>20,21,23,2<br>4 | 14 | O54800;Q5DWV2,P15399,P23593,P52590,P80202,P97580,Q09030,Q30KJ2,Q6IFU7,Q6IG05,Q91<br>XN4,Q91ZS3,Q99MH3,Q9Z2L0                      |
| 543 | 1,2,3,5,6,8<br>,18,23 | 4,7,17,19,<br>20,21,22,2<br>4 | 17 | O54800;Q5DWV2,O70594,P16636,P23785,P36374,P52590,P80202,Q05702,Q09030,Q63532,Q6<br>IFU7,Q6IG05,Q91XN4,Q91ZS3,Q99MH3,Q9JJ50,Q9Z2L0 |
| 544 | 1,2,3,5,6,8<br>,18,24 | 4,7,17,19,<br>20,21,22,2<br>3 | 12 | O54800;Q5DWV2,P20646,P52590,Q05702,Q09030,Q6IFU7,Q6IG05,Q6P6R2,Q91XN4,Q91ZS3,<br>Q9JJ50,Q9Z2L0                                    |
| 545 | 1,2,3,5,6,8<br>,19,20 | 4,7,17,18,<br>21,22,23,2<br>4 | 8  | P25031,P42854,P52590,Q05702,Q5GRG2,Q5I0J9,Q68G31,Q6IG05                                                                           |
| 546 | 1,2,3,5,6,8<br>,19,21 | 4,7,17,18,<br>20,22,23,2<br>4 | 6  | P08937,P30919,P52590,Q05702,Q09030,Q6IG05                                                                                         |
| 547 | 1,2,3,5,6,8<br>,19,22 | 4,7,17,18,<br>20,21,23,2<br>4 | 11 | P00507,P01946,P15399,P19218,P30919,P52590,P97580,Q09030,Q30KJ2,Q6IG05,Q9Z2L0                                                      |
| 548 | 1,2,3,5,6,8<br>,19,23 | 4,7,17,18,<br>20,21,22,2<br>4 | 8  | P42854,P52590,Q05702,Q09030,Q6IG05,Q8CJD3,Q99MH3,Q9Z2L0                                                                           |
| 549 | 1,2,3,5,6,8<br>,19,24 | 4,7,17,18,<br>20,21,22,2<br>3 | 5  | P30919,P52590,Q09030,Q68G31,Q6IG05                                                                                                |
| 550 | 1,2,3,5,6,8<br>,20,21 | 4,7,17,18,<br>19,22,23,2<br>4 | 12 | P19629,P25031,P36375,P47967,P52590,Q05702,Q09030,Q5I0J9,Q6IFU7,Q6IG05,Q6IMF3,Q91Z<br>S3                                           |
| 551 | 1,2,3,5,6,8<br>,20,22 | 4,7,17,18,<br>19,21,23,2<br>4 | 15 | P15399,P19218,P19629,P23593,P25031,P52590,P97580,Q05702,Q09030,Q5I0J9,Q6IFU7,Q6IG0<br>5,Q91ZS3,Q99MH3,Q9Z2L0                      |
| 552 | 1,2,3,5,6,8<br>,20,23 | 4,7,17,18,<br>19,21,22,2<br>4 | 14 | P09656,P19132,P19629,P23739,P25031,P36376,P42854,P52590,Q05702,Q09030,Q6IFU7,Q6IG0<br>5,Q99MH3,Q9Z2L0                             |
| 553 | 1,2,3,5,6,8<br>,20,24 | 4,7,17,18,<br>19,21,22,2<br>3 | 8  | P52590,Q05702,Q09030,Q5I0J9,Q6IFU7,Q6IG05,Q6IMF3,Q91ZS3                                                                           |
| 554 | 1,2,3,5,6,8<br>,21,22 | 4,7,17,18,<br>19,20,23,2<br>4 | 11 | P01946,P23593,P30919,P52590,P97580,Q09030,Q62714,Q6AYC4,Q6IFU7,Q6IG05,Q9Z2L0                                                      |

|     |                        |                               |    |                                                                                                                            |
|-----|------------------------|-------------------------------|----|----------------------------------------------------------------------------------------------------------------------------|
| 555 | 1,2,3,5,6,8<br>,21,23  | 4,7,17,18,<br>19,20,22,2<br>4 | 13 | P09656,P19132,P30919,P52590,Q05702,Q09030,Q62714,Q63532,Q6IFU7,Q6IG05,Q99MH3,Q9J<br>J50,Q9Z2L0                             |
| 556 | 1,2,3,5,6,8<br>,21,24  | 4,7,17,18,<br>19,20,22,2<br>3 | 11 | P30919,P36860,P52590,Q05702,Q09030,Q62714,Q6IFU7,Q6IFW6,Q6IG05,Q6IMF3,Q9JJ50                                               |
| 557 | 1,2,3,5,6,8<br>,22,23  | 4,7,17,18,<br>19,20,21,2<br>4 | 17 | P00507,P02783,P20646,P23593,P30919,P36374,P52590,P80202,P97580,Q09030,Q62714,Q6353<br>2,Q6IG05,Q6P6R2,Q91XN4,Q99MH3,Q9Z2L0 |
| 558 | 1,2,3,5,6,8<br>,22,24  | 4,7,17,18,<br>19,20,21,2<br>3 | 12 | P00507,P20646,P23593,P30919,P97580,Q09030,Q62714,Q6IFU7,Q6IG05,Q6P6R2,Q91XN4,Q9Z<br>2L0                                    |
| 559 | 1,2,3,5,6,8<br>,23,24  | 4,7,17,18,<br>19,20,21,2<br>2 | 14 | P20646,P23785,P30919,P80202,Q05702,Q09030,Q62714,Q63532,Q6IG05,Q6P6R2,Q91XN4,Q9<br>9MH3,Q9JJ50,Q9Z2L0                      |
| 560 | 1,2,3,5,6,1<br>7,18,19 | 4,7,8,20,2<br>1,22,23,24      | 3  | O54800;Q5DWW2,P52590,Q06000                                                                                                |
| 561 | 1,2,3,5,6,1<br>7,18,20 | 4,7,8,19,2<br>1,22,23,24      | 3  | O54800;Q5DWW2,P52590,P63029                                                                                                |
| 562 | 1,2,3,5,6,1<br>7,18,21 | 4,7,8,19,2<br>0,22,23,24      | 3  | O54800;Q5DWW2,P36860,P52590                                                                                                |
| 563 | 1,2,3,5,6,1<br>7,18,22 | 4,7,8,19,2<br>0,21,23,24      | 9  | O54800;Q5DWW2,P01946,P02091,P0C0A9,P36374,Q06000,Q63617,Q812E4,Q9Z2L0                                                      |
| 564 | 1,2,3,5,6,1<br>7,18,23 | 4,7,8,19,2<br>0,21,22,24      | 12 | O54800;Q5DWW2,O70594,P08723,P0C0A9,P16636,P30120,P36374,Q09030,Q63617,Q99MH3,<br>Q9JJ50,Q9Z2L0                             |
| 565 | 1,2,3,5,6,1<br>7,18,24 | 4,7,8,19,2<br>0,21,22,23      | 5  | O54800;Q5DWW2,P01039,Q63617,Q6AY61,Q9WTT6                                                                                  |
| 566 | 1,2,3,5,6,1<br>7,19,20 | 4,7,8,18,2<br>1,22,23,24      | 3  | P52590,P63029,Q5I0J9                                                                                                       |
| 567 | 1,2,3,5,6,1<br>7,19,21 | 4,7,8,18,2<br>0,22,23,24      | 3  | P05539,P52590,Q6AY61                                                                                                       |
| 568 | 1,2,3,5,6,1<br>7,19,22 | 4,7,8,18,2<br>0,21,23,24      | 3  | P01946,P02091,P52590                                                                                                       |
| 569 | 1,2,3,5,6,1<br>7,19,23 | 4,7,8,18,2<br>0,21,22,24      | 3  | P52590,Q99MH3,Q9Z2L0                                                                                                       |
| 570 | 1,2,3,5,6,1<br>7,19,24 | 4,7,8,18,2<br>0,21,22,23      | 3  | P01039,P52590,Q6AY61                                                                                                       |
| 571 | 1,2,3,5,6,1<br>7,20,21 | 4,7,8,18,1<br>9,22,23,24      | 4  | P52590,P63029,Q5I0J9,Q6AY61                                                                                                |
| 572 | 1,2,3,5,6,1<br>7,20,22 | 4,7,8,18,1<br>9,21,23,24      | 5  | O89117,P01946,P02091,P63029,Q5I0J9                                                                                         |

|     |                        |                          |    |                                                                                                                 |
|-----|------------------------|--------------------------|----|-----------------------------------------------------------------------------------------------------------------|
| 573 | 1,2,3,5,6,1<br>7,20,23 | 4,7,8,18,1<br>9,21,22,24 | 4  | P63029,Q09030,Q99MH3,Q9Z2L0                                                                                     |
| 574 | 1,2,3,5,6,1<br>7,20,24 | 4,7,8,18,1<br>9,21,22,23 | 4  | P01039,P63029,Q5I0J9,Q6AY61                                                                                     |
| 575 | 1,2,3,5,6,1<br>7,21,22 | 4,7,8,18,1<br>9,20,23,24 | 5  | P01946,P02091,P05539,Q09030,Q9R168                                                                              |
| 576 | 1,2,3,5,6,1<br>7,21,23 | 4,7,8,18,1<br>9,20,22,24 | 3  | P36860,Q09030,Q99MH3                                                                                            |
| 577 | 1,2,3,5,6,1<br>7,21,24 | 4,7,8,18,1<br>9,20,22,23 | 4  | P01039,P04762,P36860,Q6AY61                                                                                     |
| 578 | 1,2,3,5,6,1<br>7,22,23 | 4,7,8,18,1<br>9,20,21,24 | 16 | P01946,P02091,P02783,P08723,P0C0A9,P22273,P22282,P30120,P36374,P47727,Q09030,Q63617,Q812E4,Q99MH3,Q9WTT6,Q9Z2L0 |
| 579 | 1,2,3,5,6,1<br>7,22,24 | 4,7,8,18,1<br>9,20,21,23 | 8  | P01039,P01946,P02091,P22273,Q09030,Q63617,Q6P6R2,Q9WTT6                                                         |
| 580 | 1,2,3,5,6,1<br>7,23,24 | 4,7,8,18,1<br>9,20,21,22 | 7  | P01039,P22273,Q09030,Q63617,Q99MH3,Q9WTT6,Q9Z2L0                                                                |
| 581 | 1,2,3,5,6,1<br>8,19,20 | 4,7,8,17,2<br>1,22,23,24 | 3  | O54800;Q5DWW2,P52590,Q9Z2L0                                                                                     |
| 582 | 1,2,3,5,6,1<br>8,19,21 | 4,7,8,17,2<br>0,22,23,24 | 1  | P52590                                                                                                          |
| 583 | 1,2,3,5,6,1<br>8,19,22 | 4,7,8,17,2<br>0,21,23,24 | 5  | O54800;Q5DWW2,P01946,P52590,Q9WTT6,Q9Z2L0                                                                       |
| 584 | 1,2,3,5,6,1<br>8,19,23 | 4,7,8,17,2<br>0,21,22,24 | 5  | P30120,P52590,Q99MH3,Q9JJ50,Q9Z2L0                                                                              |
| 585 | 1,2,3,5,6,1<br>8,19,24 | 4,7,8,17,2<br>0,21,22,23 | 2  | P52590,Q9WTT6                                                                                                   |
| 586 | 1,2,3,5,6,1<br>8,20,21 | 4,7,8,17,1<br>9,22,23,24 | 3  | O54800;Q5DWW2,P47967,Q5I0J9                                                                                     |
| 587 | 1,2,3,5,6,1<br>8,20,22 | 4,7,8,17,1<br>9,21,23,24 | 3  | O54800;Q5DWW2,Q9QX74,Q9Z2L0                                                                                     |
| 588 | 1,2,3,5,6,1<br>8,20,23 | 4,7,8,17,1<br>9,21,22,24 | 5  | O54800;Q5DWW2,P16636,Q99MH3,Q9QX74,Q9Z2L0                                                                       |
| 589 | 1,2,3,5,6,1<br>8,20,24 | 4,7,8,17,1<br>9,21,22,23 | 3  | O54800;Q5DWW2,P20646,Q9QX74                                                                                     |
| 590 | 1,2,3,5,6,1<br>8,21,22 | 4,7,8,17,1<br>9,20,23,24 | 5  | O54800;Q5DWW2,P01946,P36374,Q9WTT6,Q9Z2L0                                                                       |
| 591 | 1,2,3,5,6,1<br>8,21,23 | 4,7,8,17,1<br>9,20,22,24 | 7  | P20646,P36374,Q09030,Q99MH3,Q9JJ50,Q9WTT6,Q9Z2L0                                                                |
| 592 | 1,2,3,5,6,1<br>8,21,24 | 4,7,8,17,1<br>9,20,22,23 | 5  | P20646,P36860,Q4G075,Q9JJ50,Q9WTT6                                                                              |

|     |                        |                          |                                                                                                                                                                                                    |
|-----|------------------------|--------------------------|----------------------------------------------------------------------------------------------------------------------------------------------------------------------------------------------------|
| 593 | 1,2,3,5,6,1<br>8,22,23 | 4,7,8,17,1<br>9,20,21,24 | O54800;Q5DWV2,P02781,P02782,P02783,P08723,P09456,P13676,P16636,P20646,P22273,P22226<br>82,P24368,P30120,P36374,P47727,P60905,Q09030,Q5M8C6,Q63617,Q6P6R2,Q812E4,Q99MH3,Q9EQS0,Q9QX74,Q9WTT6,Q9Z2L0 |
| 594 | 1,2,3,5,6,1<br>8,22,24 | 4,7,8,17,1<br>9,20,21,23 | 9 O54800;Q5DWV2,P13676,P20646,P36374,Q63617,Q6P6R2,Q9QX74,Q9WTT6,Q9Z2L0                                                                                                                            |
| 595 | 1,2,3,5,6,1<br>8,23,24 | 4,7,8,17,1<br>9,20,21,22 | 10 P20646,P36374,Q09030,Q63617,Q6P6R2,Q99MH3,Q9JJ50,Q9QX74,Q9WTT6,Q9Z2L0                                                                                                                           |
| 596 | 1,2,3,5,6,1<br>9,20,21 | 4,7,8,17,1<br>8,22,23,24 | 4 P47967,P52590,Q5I0D1,Q5I0J9                                                                                                                                                                      |
| 597 | 1,2,3,5,6,1<br>9,20,22 | 4,7,8,17,1<br>8,21,23,24 | 4 P01946,P52590,Q5I0J9,Q9Z2L0                                                                                                                                                                      |
| 598 | 1,2,3,5,6,1<br>9,20,23 | 4,7,8,17,1<br>8,21,22,24 | 5 P23739,P42854,P52590,Q99MH3,Q9Z2L0                                                                                                                                                               |
| 599 | 1,2,3,5,6,1<br>9,20,24 | 4,7,8,17,1<br>8,21,22,23 | 4 P52590,Q5I0J9,Q68G31,Q9QX74                                                                                                                                                                      |
| 600 | 1,2,3,5,6,1<br>9,21,22 | 4,7,8,17,1<br>8,20,23,24 | 4 P01946,P02091,P30919,P52590                                                                                                                                                                      |
| 601 | 1,2,3,5,6,1<br>9,21,23 | 4,7,8,17,1<br>8,20,22,24 | 3 P52590,Q9JJ50,Q9Z2L0                                                                                                                                                                             |
| 602 | 1,2,3,5,6,1<br>9,21,24 | 4,7,8,17,1<br>8,20,22,23 | 4 P30919,P52590,Q4G075,Q6AY61                                                                                                                                                                      |
| 603 | 1,2,3,5,6,1<br>9,22,23 | 4,7,8,17,1<br>8,20,21,24 | 16 P00507,P01946,P02091,P02783,P22273,P30120,P47727,P52590,Q09030,Q6P6R2,Q811M5,Q99MH3,Q9EQS0,Q9QX74,Q9WTT6,Q9Z2L0                                                                                 |
| 604 | 1,2,3,5,6,1<br>9,22,24 | 4,7,8,17,1<br>8,20,21,23 | 7 P00507,P01946,P30919,P52590,Q6P6R2,Q9QX74,Q9WTT6                                                                                                                                                 |
| 605 | 1,2,3,5,6,1<br>9,23,24 | 4,7,8,17,1<br>8,20,21,22 | 6 P22273,P52590,Q6P6R2,Q9QX74,Q9WTT6,Q9Z2L0                                                                                                                                                        |
| 606 | 1,2,3,5,6,2<br>0,21,22 | 4,7,8,17,1<br>8,19,23,24 | 3 P01835,P01946,Q5I0J9                                                                                                                                                                             |
| 607 | 1,2,3,5,6,2<br>0,21,23 | 4,7,8,17,1<br>8,19,22,24 | 5 P01835,P09656,Q09030,Q99MH3,Q9Z2L0                                                                                                                                                               |
| 608 | 1,2,3,5,6,2<br>0,21,24 | 4,7,8,17,1<br>8,19,22,23 | 4 P01835,P20646,Q5I0J9,Q6AY61                                                                                                                                                                      |
| 609 | 1,2,3,5,6,2<br>0,22,23 | 4,7,8,17,1<br>8,19,21,24 | 8 P02783,P09656,P20646,Q09030,Q6P6R2,Q99MH3,Q9QX74,Q9Z2L0                                                                                                                                          |
| 610 | 1,2,3,5,6,2<br>0,22,24 | 4,7,8,17,1<br>8,19,21,23 | 7 P07150,P20646,P21674,Q5I0J9,Q6P6R2,Q9QX74,Q9Z0V6                                                                                                                                                 |
| 611 | 1,2,3,5,6,2<br>0,23,24 | 4,7,8,17,1<br>8,19,21,22 | 8 P09656,P20646,P23739,Q09030,Q6P6R2,Q99MH3,Q9QX74,Q9Z2L0                                                                                                                                          |
| 612 | 1,2,3,5,6,2<br>1,22,23 | 4,7,8,17,1<br>8,19,20,24 | 13 P01946,P02783,P08723,P09656,P20646,P30919,P36374,P47727,Q09030,Q62714,Q99MH3,Q9WTT6,Q9Z2L0                                                                                                      |



|     |                        |                               |                                                                                           |                                                                                                       |
|-----|------------------------|-------------------------------|-------------------------------------------------------------------------------------------|-------------------------------------------------------------------------------------------------------|
| 613 | 1,2,3,5,6,2<br>1,22,24 | 4,7,8,17,1<br>8,19,20,23      | 11                                                                                        | P01946,P07150,P20646,P30919,P36860,Q09030,Q4G075,Q62714,Q6P6R2,Q9QX74,Q9WTT6                          |
| 614 | 1,2,3,5,6,2<br>1,23,24 | 4,7,8,17,1<br>8,19,20,22      | 9                                                                                         | P09656,P20646,P30919,P36860,Q09030,Q4G075,Q62714,Q9JJ50,Q9WTT6                                        |
| 615 | 1,2,3,5,6,2<br>2,23,24 | 4,7,8,17,1<br>8,19,20,21      | P00507,P01946,P02783,P06760,P07150,P13676,P20646,P22273,P22282,P24368,P30120,P30919<br>24 | ,P36374,P47727,P62804,Q09030,Q62714,Q63617,Q6P6R2,Q99MH3,Q9EQS0,Q9QX74,Q9WTT6<br>,Q9Z2L0              |
| 616 | 1,2,3,5,7,8<br>,17,18  | 4,6,19,20,<br>21,22,23,2<br>4 | 5                                                                                         | O70594,P20766,P22006,Q6IG05,Q811M5                                                                    |
| 617 | 1,2,3,5,7,8<br>,17,19  | 4,6,18,20,<br>21,22,23,2<br>4 | 8                                                                                         | iRT-Kit_WR_fusion,O70594,P01681,P22006,Q66H69,Q6IG05,Q6IMF3,Q811M5                                    |
| 618 | 1,2,3,5,7,8<br>,17,20  | 4,6,18,19,<br>21,22,23,2<br>4 | 11                                                                                        | D4A5U3,iRT-<br>Kit_WR_fusion,P13676,Q4FZU2,Q4G075,Q6IFU7,Q6IFW6,Q6IG05,Q6IMF3,Q6P6Q2,Q811M5           |
| 619 | 1,2,3,5,7,8<br>,17,21  | 4,6,18,19,<br>20,22,23,2<br>4 | iRT-<br>13                                                                                | Kit_WR_fusion,O70594,P04762,P06760,P11883,P22006,Q00715,Q4FZU2,Q6AY61,Q6IFW6,Q6IG<br>05,Q6IMF3,Q811M5 |
| 620 | 1,2,3,5,7,8<br>,17,22  | 4,6,18,19,<br>20,21,23,2<br>4 | 4                                                                                         | P23593,P35280,Q6IG05,Q6IMF3                                                                           |
| 621 | 1,2,3,5,7,8<br>,17,23  | 4,6,18,19,<br>20,21,22,2<br>4 | 6                                                                                         | iRT-Kit_WR_fusion,O70594,P19132,P22006,Q6IG05,Q6IMF3                                                  |
| 622 | 1,2,3,5,7,8<br>,17,24  | 4,6,18,19,<br>20,21,22,2<br>3 | 7                                                                                         | O70594,Q4FZU2,Q6AY61,Q6IFW6,Q6IG05,Q6IMF3,Q811M5                                                      |
| 623 | 1,2,3,5,7,8<br>,18,19  | 4,6,17,20,<br>21,22,23,2<br>4 | 6                                                                                         | iRT-Kit_WR_fusion,P20766,P22006,P47967,Q66H69,Q6IG05                                                  |
| 624 | 1,2,3,5,7,8<br>,18,20  | 4,6,17,19,<br>21,22,23,2<br>4 | 4                                                                                         | P47967,Q6IG05,Q811M5,Q91ZS3                                                                           |
| 625 | 1,2,3,5,7,8<br>,18,21  | 4,6,17,19,<br>20,22,23,2<br>4 | 10                                                                                        | iRT-Kit_WR_fusion,O70594,P11883,P22006,P47967,Q00715,Q6IG05,Q6IMF3,Q811M5,Q91ZS3                      |
| 626 | 1,2,3,5,7,8<br>,18,22  | 4,6,17,19,<br>20,21,23,2<br>4 | 4                                                                                         | P23593,P35280,Q6IG05,Q9WUW8                                                                           |

|     |                       |                               |    |                                                                                                                                                         |
|-----|-----------------------|-------------------------------|----|---------------------------------------------------------------------------------------------------------------------------------------------------------|
| 627 | 1,2,3,5,7,8<br>,18,23 | 4,6,17,19,<br>20,21,22,2<br>4 | 7  | O70594,P20766,P22006,Q6IG05,Q99MH3,Q9JJ50,Q9Z2L0                                                                                                        |
| 628 | 1,2,3,5,7,8<br>,18,24 | 4,6,17,19,<br>20,21,22,2<br>3 | 2  | P20766,Q6IG05                                                                                                                                           |
| 629 | 1,2,3,5,7,8<br>,19,20 | 4,6,17,18,<br>21,22,23,2<br>4 | 7  | iRT-Kit_WR_fusion,P47967,Q4G075,Q5I0D1,Q66H69,Q6IG05,Q6IMF3                                                                                             |
| 630 | 1,2,3,5,7,8<br>,19,21 | 4,6,17,18,<br>20,22,23,2<br>4 | 10 | iRT-Kit_WR_fusion,P06760,P08937,P11883,P22006,P47967,Q00715,Q66H69,Q6IG05,Q6IMF3                                                                        |
| 631 | 1,2,3,5,7,8<br>,19,22 | 4,6,17,18,<br>20,21,23,2<br>4 | 4  | iRT-Kit_WR_fusion,P11883,P35280,Q6IG05                                                                                                                  |
| 632 | 1,2,3,5,7,8<br>,19,23 | 4,6,17,18,<br>20,21,22,2<br>4 | 7  | iRT-Kit_WR_fusion,O70594,P22006,Q66H69,Q6IG05,Q6IMF3,Q8CJD3                                                                                             |
| 633 | 1,2,3,5,7,8<br>,19,24 | 4,6,17,18,<br>20,21,22,2<br>3 | 4  | iRT-Kit_WR_fusion,Q66H69,Q6IG05,Q6IMF3                                                                                                                  |
| 634 | 1,2,3,5,7,8<br>,20,21 | 4,6,17,18,<br>19,22,23,2<br>4 | 19 | D4A5U3,iRT-<br>Kit_WR_fusion,P00731,P06760,P08649,P11883,P22006,P47967,P70549,Q00715,Q5I0D1,Q6IFU7,<br>Q6IFU8,Q6IFW6,Q6IG05,Q6IMF3,Q6P6Q2,Q811M5,Q91ZS3 |
| 635 | 1,2,3,5,7,8<br>,20,22 | 4,6,17,18,<br>19,21,23,2<br>4 | 7  | iRT-Kit_WR_fusion,P35280,P47967,Q4G075,Q6IG05,Q6IMF3,Q9WUW8                                                                                             |
| 636 | 1,2,3,5,7,8<br>,20,23 | 4,6,17,18,<br>19,21,22,2<br>4 | 8  | iRT-Kit_WR_fusion,P19132,P23739,P36376,Q4G075,Q6IG05,Q6IMF3,Q99MH3                                                                                      |
| 637 | 1,2,3,5,7,8<br>,20,24 | 4,6,17,18,<br>19,21,22,2<br>3 | 7  | iRT-Kit_WR_fusion,Q4FZU2,Q6IFW6,Q6IG05,Q6IMF3,Q6P6Q2,Q811M5                                                                                             |
| 638 | 1,2,3,5,7,8<br>,21,22 | 4,6,17,18,<br>19,20,23,2<br>4 | 8  | iRT-Kit_WR_fusion,P11883,P35280,Q62714,Q6IFW6,Q6IG05,Q6IMF3,Q9WUW8                                                                                      |
| 639 | 1,2,3,5,7,8<br>,21,23 | 4,6,17,18,<br>19,20,22,2<br>4 | 11 | iRT-<br>Kit_WR_fusion,O70594,P08649,P11883,P19132,P22006,Q62714,Q6IFW6,Q6IG05,Q6IMF3,Q9JJ5<br>0                                                         |

|     |                        |                               |                                                                                                                                |
|-----|------------------------|-------------------------------|--------------------------------------------------------------------------------------------------------------------------------|
| 640 | 1,2,3,5,7,8<br>,21,24  | 4,6,17,18,<br>19,20,22,2<br>3 | iRT-<br>15 Kit_WR_fusion,P04762,P08649,P11883,P30919,P36860,Q4FZU2,Q62714,Q6AY61,Q6IFU8,Q6IFW<br>6,Q6IG05,Q6IMF3,Q6P6Q2,Q811M5 |
| 641 | 1,2,3,5,7,8<br>,22,23  | 4,6,17,18,<br>19,20,21,2<br>4 | 8 iRT-Kit_WR_fusion,P23593,P35280,Q62714,Q6IG05,Q6P6R2,Q99MH3,Q9Z2L0                                                           |
| 642 | 1,2,3,5,7,8<br>,22,24  | 4,6,17,18,<br>19,20,21,2<br>3 | 8 P23593,P35280,Q5RLM2,Q62714,Q6IG05,Q6IMF3,Q6P6R2,Q9WUW8                                                                      |
| 643 | 1,2,3,5,7,8<br>,23,24  | 4,6,17,18,<br>19,20,21,2<br>2 | 7 iRT-Kit_WR_fusion,Q62714,Q6IFW6,Q6IG05,Q6IMF3,Q6P6R2,Q9JJ50                                                                  |
| 644 | 1,2,3,5,7,1<br>7,18,19 | 4,6,8,20,2<br>1,22,23,24      | 2 P20766,P22006                                                                                                                |
| 645 | 1,2,3,5,7,1<br>7,18,20 | 4,6,8,19,2<br>1,22,23,24      | 2 P47967,Q811M5                                                                                                                |
| 646 | 1,2,3,5,7,1<br>7,18,21 | 4,6,8,19,2<br>0,22,23,24      | 3 P22006,Q6AY61,Q811M5                                                                                                         |
| 647 | 1,2,3,5,7,1<br>7,18,22 | 4,6,8,19,2<br>0,21,23,24      | 0                                                                                                                              |
| 648 | 1,2,3,5,7,1<br>7,18,23 | 4,6,8,19,2<br>0,21,22,24      | 4 O70594,P22006,P30120,P36374                                                                                                  |
| 649 | 1,2,3,5,7,1<br>7,18,24 | 4,6,8,19,2<br>0,21,22,23      | 2 P20766,Q6AY61                                                                                                                |
| 650 | 1,2,3,5,7,1<br>7,19,20 | 4,6,8,18,2<br>1,22,23,24      | 3 P47967,Q6AY61,Q811M5                                                                                                         |
| 651 | 1,2,3,5,7,1<br>7,19,21 | 4,6,8,18,2<br>0,22,23,24      | 3 P22006,P47967,Q6AY61                                                                                                         |
| 652 | 1,2,3,5,7,1<br>7,19,22 | 4,6,8,18,2<br>0,21,23,24      | 1 Q9R168                                                                                                                       |
| 653 | 1,2,3,5,7,1<br>7,19,23 | 4,6,8,18,2<br>0,21,22,24      | 1 P22006                                                                                                                       |
| 654 | 1,2,3,5,7,1<br>7,19,24 | 4,6,8,18,2<br>0,21,22,23      | 2 P54921,Q6AY61                                                                                                                |
| 655 | 1,2,3,5,7,1<br>7,20,21 | 4,6,8,18,1<br>9,22,23,24      | 4 P22006,P47967,Q6AY61,Q811M5                                                                                                  |
| 656 | 1,2,3,5,7,1<br>7,20,22 | 4,6,8,18,1<br>9,21,23,24      | 0                                                                                                                              |
| 657 | 1,2,3,5,7,1<br>7,20,23 | 4,6,8,18,1<br>9,21,22,24      | 1 P23739                                                                                                                       |

|     |                        |                          |                                                                  |
|-----|------------------------|--------------------------|------------------------------------------------------------------|
| 658 | 1,2,3,5,7,1<br>7,20,24 | 4,6,8,18,1<br>9,21,22,23 | 2 Q6AY61,Q811M5                                                  |
| 659 | 1,2,3,5,7,1<br>7,21,22 | 4,6,8,18,1<br>9,20,23,24 | 1 Q9R168                                                         |
| 660 | 1,2,3,5,7,1<br>7,21,23 | 4,6,8,18,1<br>9,20,22,24 | 2 P22006,Q6AY61                                                  |
| 661 | 1,2,3,5,7,1<br>7,21,24 | 4,6,8,18,1<br>9,20,22,23 | 5 P04762,P36860,Q6AY61,Q811M5,Q9R168                             |
| 662 | 1,2,3,5,7,1<br>7,22,23 | 4,6,8,18,1<br>9,20,21,24 | 5 P22273,P22282,P30120,P36374,Q9R168                             |
| 663 | 1,2,3,5,7,1<br>7,22,24 | 4,6,8,18,1<br>9,20,21,23 | 1 Q9R168                                                         |
| 664 | 1,2,3,5,7,1<br>7,23,24 | 4,6,8,18,1<br>9,20,21,22 | 1 Q6AY61                                                         |
| 665 | 1,2,3,5,7,1<br>8,19,20 | 4,6,8,17,2<br>1,22,23,24 | 4 P20766,P47967,P97840,Q5I0D1                                    |
| 666 | 1,2,3,5,7,1<br>8,19,21 | 4,6,8,17,2<br>0,22,23,24 | 2 P22006,P47967                                                  |
| 667 | 1,2,3,5,7,1<br>8,19,22 | 4,6,8,17,2<br>0,21,23,24 | 0                                                                |
| 668 | 1,2,3,5,7,1<br>8,19,23 | 4,6,8,17,2<br>0,21,22,24 | 2 P20766,Q9Z2L0                                                  |
| 669 | 1,2,3,5,7,1<br>8,19,24 | 4,6,8,17,2<br>0,21,22,23 | 1 P20766                                                         |
| 670 | 1,2,3,5,7,1<br>8,20,21 | 4,6,8,17,1<br>9,22,23,24 | 4 P47967,P97840,Q5I0D1,Q811M5                                    |
| 671 | 1,2,3,5,7,1<br>8,20,22 | 4,6,8,17,1<br>9,21,23,24 | 3 P47967,Q03191,Q9WUW8                                           |
| 672 | 1,2,3,5,7,1<br>8,20,23 | 4,6,8,17,1<br>9,21,22,24 | 1 Q03191                                                         |
| 673 | 1,2,3,5,7,1<br>8,20,24 | 4,6,8,17,1<br>9,21,22,23 | 1 P47967                                                         |
| 674 | 1,2,3,5,7,1<br>8,21,22 | 4,6,8,17,1<br>9,20,23,24 | 2 P47967,Q9WUW8                                                  |
| 675 | 1,2,3,5,7,1<br>8,21,23 | 4,6,8,17,1<br>9,20,22,24 | 4 O89117,P22006,P36374,Q9JJ50                                    |
| 676 | 1,2,3,5,7,1<br>8,21,24 | 4,6,8,17,1<br>9,20,22,23 | 3 O89117,Q6AY61,Q9JJ50                                           |
| 677 | 1,2,3,5,7,1<br>8,22,23 | 4,6,8,17,1<br>9,20,21,24 | 9 P08723,P22282,P30120,P36374,P47727,P60905,Q6P6R2,Q99MH3,Q9Z2L0 |

|     |                        |                          |   |                                           |
|-----|------------------------|--------------------------|---|-------------------------------------------|
| 678 | 1,2,3,5,7,1<br>8,22,24 | 4,6,8,17,1<br>9,20,21,23 | 3 | P36374,Q6P6R2,Q9WUW8                      |
| 679 | 1,2,3,5,7,1<br>8,23,24 | 4,6,8,17,1<br>9,20,21,22 | 4 | P20766,P36374,Q6P6R2,Q9JJ50               |
| 680 | 1,2,3,5,7,1<br>9,20,21 | 4,6,8,17,1<br>8,22,23,24 | 4 | P08649,P47967,Q5I0D1,Q6AY61               |
| 681 | 1,2,3,5,7,1<br>9,20,22 | 4,6,8,17,1<br>8,21,23,24 | 1 | P47967                                    |
| 682 | 1,2,3,5,7,1<br>9,20,23 | 4,6,8,17,1<br>8,21,22,24 | 3 | P08649,P23739,P47967                      |
| 683 | 1,2,3,5,7,1<br>9,20,24 | 4,6,8,17,1<br>8,21,22,23 | 3 | P08649,P47967,Q6AY61                      |
| 684 | 1,2,3,5,7,1<br>9,21,22 | 4,6,8,17,1<br>8,20,23,24 | 2 | P08649,P47967                             |
| 685 | 1,2,3,5,7,1<br>9,21,23 | 4,6,8,17,1<br>8,20,22,24 | 2 | P08649,P22006                             |
| 686 | 1,2,3,5,7,1<br>9,21,24 | 4,6,8,17,1<br>8,20,22,23 | 4 | P08649,P47967,Q62761;Q62762;Q62763,Q6AY61 |
| 687 | 1,2,3,5,7,1<br>9,22,23 | 4,6,8,17,1<br>8,20,21,24 | 3 | P30120,P47727,Q9Z2L0                      |
| 688 | 1,2,3,5,7,1<br>9,22,24 | 4,6,8,17,1<br>8,20,21,23 | 0 |                                           |
| 689 | 1,2,3,5,7,1<br>9,23,24 | 4,6,8,17,1<br>8,20,21,22 | 1 | P08649                                    |
| 690 | 1,2,3,5,7,2<br>0,21,22 | 4,6,8,17,1<br>8,19,23,24 | 4 | P01835,P08649,P47967,Q9WUW8               |
| 691 | 1,2,3,5,7,2<br>0,21,23 | 4,6,8,17,1<br>8,19,22,24 | 3 | P01835,P08649,P47967                      |
| 692 | 1,2,3,5,7,2<br>0,21,24 | 4,6,8,17,1<br>8,19,22,23 | 5 | P01835,P08649,P47967,Q6AY61,Q811M5        |
| 693 | 1,2,3,5,7,2<br>0,22,23 | 4,6,8,17,1<br>8,19,21,24 | 3 | P08649,Q03191,Q99MH3                      |
| 694 | 1,2,3,5,7,2<br>0,22,24 | 4,6,8,17,1<br>8,19,21,23 | 3 | P08649,Q6P6R2,Q9WUW8                      |
| 695 | 1,2,3,5,7,2<br>0,23,24 | 4,6,8,17,1<br>8,19,21,22 | 2 | P08649,P23739                             |
| 696 | 1,2,3,5,7,2<br>1,22,23 | 4,6,8,17,1<br>8,19,20,24 | 5 | P08649,P36374,P47727,Q62714,Q9R168        |
| 697 | 1,2,3,5,7,2<br>1,22,24 | 4,6,8,17,1<br>8,19,20,23 | 4 | P08649,Q62714,Q9R168,Q9WUW8               |

|     |                        |                          |    |                                                                                     |
|-----|------------------------|--------------------------|----|-------------------------------------------------------------------------------------|
| 698 | 1,2,3,5,7,2<br>1,23,24 | 4,6,8,17,1<br>8,19,20,22 | 5  | P08649,P36860,Q62714,Q6AY61,Q9JJ50                                                  |
| 699 | 1,2,3,5,7,2<br>2,23,24 | 4,6,8,17,1<br>8,19,20,21 | 9  | BOLT89,P08649,P22273,P22282,P36374,P47727,Q62714,Q6P6R2,Q9QX74                      |
| 700 | 1,2,3,5,8,1<br>7,18,19 | 4,6,7,20,2<br>1,22,23,24 | 2  | P22006,Q6IG05                                                                       |
| 701 | 1,2,3,5,8,1<br>7,18,20 | 4,6,7,19,2<br>1,22,23,24 | 3  | Q6IFU7,Q6IG05,Q811M5                                                                |
| 702 | 1,2,3,5,8,1<br>7,18,21 | 4,6,7,19,2<br>0,22,23,24 | 4  | P22006,Q6IFU7,Q6IG05,Q811M5                                                         |
| 703 | 1,2,3,5,8,1<br>7,18,22 | 4,6,7,19,2<br>0,21,23,24 | 3  | P00714,P11598,Q63617                                                                |
| 704 | 1,2,3,5,8,1<br>7,18,23 | 4,6,7,19,2<br>0,21,22,24 | 7  | O70594,P00714,P22006,P36376,Q63617,Q6IG05,Q99MH3                                    |
| 705 | 1,2,3,5,8,1<br>7,18,24 | 4,6,7,19,2<br>0,21,22,23 | 3  | Q63617,Q6IFU7,Q6IG05                                                                |
| 706 | 1,2,3,5,8,1<br>7,19,20 | 4,6,7,18,2<br>1,22,23,24 | 5  | P13676,Q6IG05,Q6IMF3,Q811M5,Q8CJD3                                                  |
| 707 | 1,2,3,5,8,1<br>7,19,21 | 4,6,7,18,2<br>0,22,23,24 | 5  | P22006,Q66H69,Q6IG05,Q6IMF3,Q9WVK7                                                  |
| 708 | 1,2,3,5,8,1<br>7,19,22 | 4,6,7,18,2<br>0,21,23,24 | 1  | Q6IG05                                                                              |
| 709 | 1,2,3,5,8,1<br>7,19,23 | 4,6,7,18,2<br>0,21,22,24 | 4  | P22006,P36376,Q6IG05,Q8CJD3                                                         |
| 710 | 1,2,3,5,8,1<br>7,19,24 | 4,6,7,18,2<br>0,21,22,23 | 2  | Q6IG05,Q6IMF3                                                                       |
| 711 | 1,2,3,5,8,1<br>7,20,21 | 4,6,7,18,1<br>9,22,23,24 | 12 | P13676,P22006,P25809,P36375,P63029,Q4FZU2,Q6IFU7,Q6IFW6,Q6IG05,Q6IMF3,Q6P6Q2,Q811M5 |
| 712 | 1,2,3,5,8,1<br>7,20,22 | 4,6,7,18,1<br>9,21,23,24 | 2  | Q6IFU7,Q6IG05                                                                       |
| 713 | 1,2,3,5,8,1<br>7,20,23 | 4,6,7,18,1<br>9,21,22,24 | 8  | P19132,P23739,P36376,P63029,Q6IFU7,Q6IG05,Q6IMF3,Q99MH3                             |
| 714 | 1,2,3,5,8,1<br>7,20,24 | 4,6,7,18,1<br>9,21,22,23 | 7  | Q4FZU2,Q6IFU7,Q6IFW6,Q6IG05,Q6IMF3,Q6P6Q2,Q811M5                                    |
| 715 | 1,2,3,5,8,1<br>7,21,22 | 4,6,7,18,1<br>9,20,23,24 | 2  | Q6IFU7,Q6IG05                                                                       |
| 716 | 1,2,3,5,8,1<br>7,21,23 | 4,6,7,18,1<br>9,20,22,24 | 6  | P19132,P22006,P36376,Q6IFU7,Q6IG05,Q6IMF3                                           |
| 717 | 1,2,3,5,8,1<br>7,21,24 | 4,6,7,18,1<br>9,20,22,23 | 8  | Q4FZU2,Q6AY61,Q6IFU7,Q6IFW6,Q6IG05,Q6IMF3,Q6P6Q2,Q811M5                             |

|     |                        |                          |   |                                                         |
|-----|------------------------|--------------------------|---|---------------------------------------------------------|
| 718 | 1,2,3,5,8,1<br>7,22,23 | 4,6,7,18,1<br>9,20,21,24 | 8 | P00714,P11598,P22283,P36374,P36376,Q63617,Q6IG05,Q99MH3 |
| 719 | 1,2,3,5,8,1<br>7,22,24 | 4,6,7,18,1<br>9,20,21,23 | 2 | P11598,Q63617                                           |
| 720 | 1,2,3,5,8,1<br>7,23,24 | 4,6,7,18,1<br>9,20,21,22 | 7 | P11598,P36376,Q5PQL7,Q63617,Q6IG05,Q6IMF3,Q80WL1        |
| 721 | 1,2,3,5,8,1<br>8,19,20 | 4,6,7,17,2<br>1,22,23,24 | 3 | P47967,Q6IG05,Q9R168                                    |
| 722 | 1,2,3,5,8,1<br>8,19,21 | 4,6,7,17,2<br>0,22,23,24 | 3 | P22006,Q66H69,Q6IG05                                    |
| 723 | 1,2,3,5,8,1<br>8,19,22 | 4,6,7,17,2<br>0,21,23,24 | 0 |                                                         |
| 724 | 1,2,3,5,8,1<br>8,19,23 | 4,6,7,17,2<br>0,21,22,24 | 4 | P22006,Q6IG05,Q9Z0J6,Q9Z2L0                             |
| 725 | 1,2,3,5,8,1<br>8,19,24 | 4,6,7,17,2<br>0,21,22,23 | 1 | Q6IG05                                                  |
| 726 | 1,2,3,5,8,1<br>8,20,21 | 4,6,7,17,1<br>9,22,23,24 | 6 | P25809,P47967,Q6IFU7,Q6IG05,Q811M5,Q91ZS3               |
| 727 | 1,2,3,5,8,1<br>8,20,22 | 4,6,7,17,1<br>9,21,23,24 | 2 | Q6IFU7,Q6IG05                                           |
| 728 | 1,2,3,5,8,1<br>8,20,23 | 4,6,7,17,1<br>9,21,22,24 | 8 | P19132,P23739,P36376,Q6IFU7,Q6IG05,Q99MH3,Q9R168,Q9Z2L0 |
| 729 | 1,2,3,5,8,1<br>8,20,24 | 4,6,7,17,1<br>9,21,22,23 | 3 | Q6IFU7,Q6IG05,Q9R168                                    |
| 730 | 1,2,3,5,8,1<br>8,21,22 | 4,6,7,17,1<br>9,20,23,24 | 0 |                                                         |
| 731 | 1,2,3,5,8,1<br>8,21,23 | 4,6,7,17,1<br>9,20,22,24 | 5 | P19132,P22006,Q6IG05,Q99MH3,Q9JJ50                      |
| 732 | 1,2,3,5,8,1<br>8,21,24 | 4,6,7,17,1<br>9,20,22,23 | 2 | Q6IFW6,Q6IG05                                           |
| 733 | 1,2,3,5,8,1<br>8,22,23 | 4,6,7,17,1<br>9,20,21,24 | 8 | P00714,P11598,P22283,P36374,Q63617,Q6IG05,Q99MH3,Q9Z2L0 |
| 734 | 1,2,3,5,8,1<br>8,22,24 | 4,6,7,17,1<br>9,20,21,23 | 2 | Q63617,Q6P6R2                                           |
| 735 | 1,2,3,5,8,1<br>8,23,24 | 4,6,7,17,1<br>9,20,21,22 | 5 | P36374,Q63617,Q6IG05,Q6P6R2,Q9JJ50                      |
| 736 | 1,2,3,5,8,1<br>9,20,21 | 4,6,7,17,1<br>8,22,23,24 | 5 | P22006,P47967,Q5I0D1,Q6IG05,Q6IMF3                      |
| 737 | 1,2,3,5,8,1<br>9,20,22 | 4,6,7,17,1<br>8,21,23,24 | 2 | O88797,Q6IG05                                           |

|     |                         |                          |    |                                                                       |
|-----|-------------------------|--------------------------|----|-----------------------------------------------------------------------|
| 738 | 1,2,3,5,8,1<br>9,20,23  | 4,6,7,17,1<br>8,21,22,24 | 4  | P23739,P36376,Q6IG05,Q8CJD3                                           |
| 739 | 1,2,3,5,8,1<br>9,20,24  | 4,6,7,17,1<br>8,21,22,23 | 2  | Q6IG05,Q6IMF3                                                         |
| 740 | 1,2,3,5,8,1<br>9,21,22  | 4,6,7,17,1<br>8,20,23,24 | 3  | P30919,Q6IG05,Q9QYP1                                                  |
| 741 | 1,2,3,5,8,1<br>9,21,23  | 4,6,7,17,1<br>8,20,22,24 | 3  | P22006,Q6IG05,Q9Z0J6                                                  |
| 742 | 1,2,3,5,8,1<br>9,21,24  | 4,6,7,17,1<br>8,20,22,23 | 4  | P30919,Q6IFW6,Q6IG05,Q6IMF3                                           |
| 743 | 1,2,3,5,8,1<br>9,22,23  | 4,6,7,17,1<br>8,20,21,24 | 5  | P00507,Q6IG05,Q99MH3,Q9Z0J6,Q9Z2L0                                    |
| 744 | 1,2,3,5,8,1<br>9,22,24  | 4,6,7,17,1<br>8,20,21,23 | 2  | P00507,P30919                                                         |
| 745 | 1,2,3,5,8,1<br>9,23,24  | 4,6,7,17,1<br>8,20,21,22 | 2  | Q6IG05,Q9Z0J6                                                         |
| 746 | 1,2,3,5,8,2<br>0,21,22  | 4,6,7,17,1<br>8,19,23,24 | 3  | F1M3L7,Q6IFU7,Q6IG05                                                  |
| 747 | 1,2,3,5,8,2<br>0,21,23  | 4,6,7,17,1<br>8,19,22,24 | 7  | P19132,P23739,P36376,Q6IFU7,Q6IFW6,Q6IG05,Q6IMF3                      |
| 748 | 1,2,3,5,8,2<br>0,21,24  | 4,6,7,17,1<br>8,19,22,23 | 6  | Q6IFU7,Q6IFW6,Q6IG05,Q6IMF3,Q6P6Q2,Q811M5                             |
| 749 | 1,2,3,5,8,2<br>0,22,23  | 4,6,7,17,1<br>8,19,21,24 | 5  | P23739,P36376,Q6IG05,Q99MH3,Q9Z2L0                                    |
| 750 | 1,2,3,5,8,2<br>0,22,24  | 4,6,7,17,1<br>8,19,21,23 | 1  | Q6IG05                                                                |
| 751 | 1,2,3,5,8,2<br>0,23,24  | 4,6,7,17,1<br>8,19,21,22 | 5  | P23739,P36376,Q5QE79,Q6IG05,Q6IMF3                                    |
| 752 | 1,2,3,5,8,2<br>1,22,23  | 4,6,7,17,1<br>8,19,20,24 | 5  | P30919,P36374,Q62714,Q6IG05,Q99MH3                                    |
| 753 | 1,2,3,5,8,2<br>1,22,24  | 4,6,7,17,1<br>8,19,20,23 | 4  | P30919,Q62714,Q6IFW6,Q6IMF3                                           |
| 754 | 1,2,3,5,8,2<br>1,23,24  | 4,6,7,17,1<br>8,19,20,22 | 8  | P30919,Q62714,Q6IFW6,Q6IG05,Q6IMF3,Q80WL1,Q9JJ50,Q9Z0J6               |
| 755 | 1,2,3,5,8,2<br>2,23,24  | 4,6,7,17,1<br>8,19,20,21 | 10 | P00507,P11598,P20646,P22283,P30919,P36374,Q62714,Q63617,Q6P6R2,Q99MH3 |
| 756 | 1,2,3,5,17,<br>18,19,20 | 4,6,7,8,21,<br>22,23,24  | 1  | Q99041                                                                |
| 757 | 1,2,3,5,17,<br>18,19,21 | 4,6,7,8,20,<br>22,23,24  | 3  | P22006,P22273,Q99041                                                  |



|     |                                              |                                                                                                                                                                                |
|-----|----------------------------------------------|--------------------------------------------------------------------------------------------------------------------------------------------------------------------------------|
| 758 | 1,2,3,5,17, 4,6,7,8,20,<br>18,19,22 21,23,24 | 6 P00714,P11598,P22273,P22282,Q63617,Q812E4                                                                                                                                    |
| 759 | 1,2,3,5,17, 4,6,7,8,20,<br>18,19,23 21,22,24 | 10 P00714,P02780,P08723,P11598,P22006,P22273,P22282,Q5M8C6,Q63617,Q99041                                                                                                       |
| 760 | 1,2,3,5,17, 4,6,7,8,20,<br>18,19,24 21,22,23 | 4 P22273,Q4G075,Q63617,Q99041                                                                                                                                                  |
| 761 | 1,2,3,5,17, 4,6,7,8,19,<br>18,20,21 22,23,24 | 2 Q811M5,Q99041                                                                                                                                                                |
| 762 | 1,2,3,5,17, 4,6,7,8,19,<br>18,20,22 21,23,24 | 4 P00714,P0C0A9,P22282,Q63474                                                                                                                                                  |
| 763 | 1,2,3,5,17, 4,6,7,8,19,<br>18,20,23 21,22,24 | 4 P00714,P0C0A9,P22282,Q99041                                                                                                                                                  |
| 764 | 1,2,3,5,17, 4,6,7,8,19,<br>18,20,24 21,22,23 | 2 Q811M5,Q99041                                                                                                                                                                |
| 765 | 1,2,3,5,17, 4,6,7,8,19,<br>18,21,22 20,23,24 | 10 P00714,P02780,P08723,P0C0A9,P11598,P22273,P22282,P36374,Q63617,Q812E4                                                                                                       |
| 766 | 1,2,3,5,17, 4,6,7,8,19,<br>18,21,23 20,22,24 | 13 P00714,P02780,P06761,P08723,P0C0A9,P22006,P22273,P22282,P36374,Q63617,Q99041,Q9QW07,Q9QZK9                                                                                  |
| 767 | 1,2,3,5,17, 4,6,7,8,19,<br>18,21,24 20,22,23 | 7 P02780,P22273,P22282,Q4G075,Q63617,Q6AY61,Q99041                                                                                                                             |
| 768 | 1,2,3,5,17, 4,6,7,8,19,<br>18,22,23 20,21,24 | P00714,P02780,P02781,P02782,P04905,P06761,P08723,P09456,P0C0A9,P11598,P22273,P22282,P22283,P24368,P30120,P36374,P46462,Q5M8C6,Q63617,Q812E4,Q99041,Q99MH3,Q9QW07,Q9ROT3,Q9Z2L0 |
| 769 | 1,2,3,5,17, 4,6,7,8,19,<br>18,22,24 20,21,23 | 14 P00714,P02780,P06761,P0C0A9,P11598,P22273,P22282,P22283,P36374,P46462,Q63617,Q812E4,Q99041,Q9WTT6                                                                           |
| 770 | 1,2,3,5,17, 4,6,7,8,19,<br>18,23,24 20,21,22 | 14 P00714,P02780,P06761,P0C0A9,P11598,P22273,P22282,P22283,P36374,P46462,Q4G075,Q63617,Q99041,Q9WTT6                                                                           |
| 771 | 1,2,3,5,17, 4,6,7,8,18,<br>19,20,21 22,23,24 | 4 P22006,Q6AY61,Q99041,Q9WVK7                                                                                                                                                  |
| 772 | 1,2,3,5,17, 4,6,7,8,18,<br>19,20,22 21,23,24 | 1 O89117                                                                                                                                                                       |
| 773 | 1,2,3,5,17, 4,6,7,8,18,<br>19,20,23 21,22,24 | 2 P23739,Q99041                                                                                                                                                                |
| 774 | 1,2,3,5,17, 4,6,7,8,18,<br>19,20,24 21,22,23 | 3 P54921,Q6AY61,Q99041                                                                                                                                                         |
| 775 | 1,2,3,5,17, 4,6,7,8,18,<br>19,21,22 20,23,24 | 3 P01946,P02091,P22273                                                                                                                                                         |
| 776 | 1,2,3,5,17, 4,6,7,8,18,<br>19,21,23 20,22,24 | 5 P02780,P12020,P22006,P22273,Q99041                                                                                                                                           |
| 777 | 1,2,3,5,17, 4,6,7,8,18,<br>19,21,24 20,22,23 | 5 P22273,P54921,Q4G075,Q6AY61,Q99041                                                                                                                                           |

|     |                                              |    |                                                                                                                                                    |
|-----|----------------------------------------------|----|----------------------------------------------------------------------------------------------------------------------------------------------------|
| 778 | 1,2,3,5,17, 4,6,7,8,18,<br>19,22,23 20,21,24 | 12 | P00714,P02091,P02780,P06761,P08723,P11598,P22273,P22282,P22283,Q5M8C6,Q63617,Q9QW07                                                                |
| 779 | 1,2,3,5,17, 4,6,7,8,18,<br>19,22,24 20,21,23 | 6  | P02780,P06761,P11598,P22273,P22282,Q63617                                                                                                          |
| 780 | 1,2,3,5,17, 4,6,7,8,18,<br>19,23,24 20,21,22 | 7  | P02780,P06761,P11598,P22273,P22282,Q63617,Q99041                                                                                                   |
| 781 | 1,2,3,5,17, 4,6,7,8,18,<br>20,21,22 19,23,24 | 1  | P63029                                                                                                                                             |
| 782 | 1,2,3,5,17, 4,6,7,8,18,<br>20,21,23 19,22,24 | 3  | P22006,P63029,Q99041                                                                                                                               |
| 783 | 1,2,3,5,17, 4,6,7,8,18,<br>20,21,24 19,22,23 | 3  | Q6AY61,Q811M5,Q99041                                                                                                                               |
| 784 | 1,2,3,5,17, 4,6,7,8,18,<br>20,22,23 19,21,24 | 9  | P00714,P06761,P0C0A9,P22273,P22282,P23739,P63029,Q63617,Q99MH3                                                                                     |
| 785 | 1,2,3,5,17, 4,6,7,8,18,<br>20,22,24 19,21,23 | 1  | P22282                                                                                                                                             |
| 786 | 1,2,3,5,17, 4,6,7,8,18,<br>20,23,24 19,21,22 | 4  | P00714,P22282,P23739,Q99041                                                                                                                        |
| 787 | 1,2,3,5,17, 4,6,7,8,18,<br>21,22,23 19,20,24 | 13 | P00714,P02780,P06761,P08723,P0C0A9,P11598,P22273,P22282,P22283,P36374,P46462,Q63617,Q9QW07                                                         |
| 788 | 1,2,3,5,17, 4,6,7,8,18,<br>21,22,24 19,20,23 | 9  | P02780,P06761,P0C0A9,P11598,P22273,P22282,Q4G075,Q63617,Q9R168                                                                                     |
| 789 | 1,2,3,5,17, 4,6,7,8,18,<br>21,23,24 19,20,22 | 11 | P02780,P06761,P0C0A9,P11598,P12020,P22273,P22282,Q4G075,Q63617,Q6AY61,Q99041                                                                       |
| 790 | 1,2,3,5,17, 4,6,7,8,18,<br>22,23,24 19,20,21 | 21 | P00714,P02780,P04905,P06761,P07150,P0C0A9,P11598,P22273,P22282,P22283,P24368,P36374,P46462,P47727,Q5M8C6,Q63617,Q6P6R2,Q99041,Q9QW07,Q9R0T3,Q9WTT6 |
| 791 | 1,2,3,5,18, 4,6,7,8,17,<br>19,20,21 22,23,24 | 1  | P47967                                                                                                                                             |
| 792 | 1,2,3,5,18, 4,6,7,8,17,<br>19,20,22 21,23,24 | 1  | Q63474                                                                                                                                             |
| 793 | 1,2,3,5,18, 4,6,7,8,17,<br>19,20,23 21,22,24 | 1  | Q99041                                                                                                                                             |
| 794 | 1,2,3,5,18, 4,6,7,8,17,<br>19,20,24 21,22,23 | 1  | Q99041                                                                                                                                             |
| 795 | 1,2,3,5,18, 4,6,7,8,17,<br>19,21,22 20,23,24 | 2  | P22273,Q4G075                                                                                                                                      |
| 796 | 1,2,3,5,18, 4,6,7,8,17,<br>19,21,23 20,22,24 | 6  | P06911,P22006,P22273,Q4G075,Q99041,Q9Z0J6                                                                                                          |
| 797 | 1,2,3,5,18, 4,6,7,8,17,<br>19,21,24 20,22,23 | 3  | P22273,Q4G075,Q99041                                                                                                                               |

|     |                                              |    |                                                                                                                                                                                                                                  |
|-----|----------------------------------------------|----|----------------------------------------------------------------------------------------------------------------------------------------------------------------------------------------------------------------------------------|
| 798 | 1,2,3,5,18, 4,6,7,8,17,<br>19,22,23 20,21,24 | 19 | P00714,P02780,P02781,P02782,P06761,P08723,P09456,P11598,P22273,P22282,P22283,P30120<br>,P46462,P47727,Q5M8C6,Q63617,Q99MH3,Q9WTT6,Q9Z2L0                                                                                         |
| 799 | 1,2,3,5,18, 4,6,7,8,17,<br>19,22,24 20,21,23 | 6  | P11598,P22273,P22282,Q4G075,Q63617,Q9WTT6                                                                                                                                                                                        |
| 800 | 1,2,3,5,18, 4,6,7,8,17,<br>19,23,24 20,21,22 | 10 | P02780,P06761,P11598,P22273,P22282,Q4G075,Q63617,Q99041,Q9WTT6,Q9Z0J6                                                                                                                                                            |
| 801 | 1,2,3,5,18, 4,6,7,8,17,<br>20,21,22 19,23,24 | 0  |                                                                                                                                                                                                                                  |
| 802 | 1,2,3,5,18, 4,6,7,8,17,<br>20,21,23 19,22,24 | 1  | Q99041                                                                                                                                                                                                                           |
| 803 | 1,2,3,5,18, 4,6,7,8,17,<br>20,21,24 19,22,23 | 1  | Q99041                                                                                                                                                                                                                           |
| 804 | 1,2,3,5,18, 4,6,7,8,17,<br>20,22,23 19,21,24 | 8  | P00714,P06761,P22282,Q5QE79,Q63474,Q99MH3,Q9QX74,Q9Z2L0                                                                                                                                                                          |
| 805 | 1,2,3,5,18, 4,6,7,8,17,<br>20,22,24 19,21,23 | 3  | P21674,P22282,Q9QX74                                                                                                                                                                                                             |
| 806 | 1,2,3,5,18, 4,6,7,8,17,<br>20,23,24 19,21,22 | 6  | P00714,P20646,P22282,Q5QE79,Q99041,Q9QX74                                                                                                                                                                                        |
| 807 | 1,2,3,5,18, 4,6,7,8,17,<br>21,22,23 19,20,24 | 19 | P00714,P02780,P06761,P08723,P09456,P11598,P22273,P22282,P22283,P36374,P46462,P47727<br>,Q4G075,Q5M8C6,Q63617,Q6RUV5,Q99MH3,Q9WTT6,Q9Z2L0                                                                                         |
| 808 | 1,2,3,5,18, 4,6,7,8,17,<br>21,22,24 19,20,23 | 8  | P06761,P20646,P22273,P22282,P36374,Q4G075,Q63617,Q9WTT6                                                                                                                                                                          |
| 809 | 1,2,3,5,18, 4,6,7,8,17,<br>21,23,24 19,20,22 | 13 | O89117,P02780,P06761,P20646,P22273,P22282,P36374,Q4G075,Q63617,Q99041,Q9JJ50,Q9Q<br>ZK9,Q9WTT6                                                                                                                                   |
| 810 | 1,2,3,5,18, 4,6,7,8,17,<br>22,23,24 19,20,21 | 31 | D4A5U3,P00714,P02780,P04905,P06761,P07150,P08723,P0C0A9,P11598,P13676,P20646,P2227<br>3,P22282,P22283,P24368,P30120,P36374,P46462,P47727,Q4G075,Q5M8C6,Q5QE79,Q63617,Q<br>6P6R2,Q6RUV5,Q99041,Q99MH3,Q9QX74,Q9R0T3,Q9WTT6,Q9Z2L0 |
| 811 | 1,2,3,5,19, 4,6,7,8,17,<br>20,21,22 18,23,24 | 1  | P47967                                                                                                                                                                                                                           |
| 812 | 1,2,3,5,19, 4,6,7,8,17,<br>20,21,23 18,22,24 | 0  |                                                                                                                                                                                                                                  |
| 813 | 1,2,3,5,19, 4,6,7,8,17,<br>20,21,24 18,22,23 | 2  | Q6AY61,Q99041                                                                                                                                                                                                                    |
| 814 | 1,2,3,5,19, 4,6,7,8,17,<br>20,22,23 18,21,24 | 2  | P23739,Q9QX74                                                                                                                                                                                                                    |
| 815 | 1,2,3,5,19, 4,6,7,8,17,<br>20,22,24 18,21,23 | 1  | Q9QX74                                                                                                                                                                                                                           |
| 816 | 1,2,3,5,19, 4,6,7,8,17,<br>20,23,24 18,21,22 | 3  | P23739,Q99041,Q9QX74                                                                                                                                                                                                             |
| 817 | 1,2,3,5,19, 4,6,7,8,17,<br>21,22,23 18,20,24 | 6  | P06761,P06911,P12020,P22273,P22282,P47727                                                                                                                                                                                        |

|     |                                              |    |                                                                                                                                                                  |
|-----|----------------------------------------------|----|------------------------------------------------------------------------------------------------------------------------------------------------------------------|
| 818 | 1,2,3,5,19, 4,6,7,8,17,<br>21,22,24 18,20,23 | 4  | P06911,P22273,P30919,Q4G075                                                                                                                                      |
| 819 | 1,2,3,5,19, 4,6,7,8,17,<br>21,23,24 18,20,22 | 8  | O70417,P06911,P08649,P12020,P22273,Q4G075,Q99041,Q9Z0J6                                                                                                          |
| 820 | 1,2,3,5,19, 4,6,7,8,17,<br>22,23,24 18,20,21 | 15 | P00507,P02631,P02780,P06761,P06911,P11598,P22273,P22282,P22283,P47727,Q5M8C6,Q63617,Q6P6R2,Q9QX74,Q9WTT6                                                         |
| 821 | 1,2,3,5,20, 4,6,7,8,17,<br>21,22,23 18,19,24 | 2  | P08649,P22282                                                                                                                                                    |
| 822 | 1,2,3,5,20, 4,6,7,8,17,<br>21,22,24 18,19,23 | 4  | P07150,P08649,P21674,Q9QX74                                                                                                                                      |
| 823 | 1,2,3,5,20, 4,6,7,8,17,<br>21,23,24 18,19,22 | 3  | P08649,P23739,Q99041                                                                                                                                             |
| 824 | 1,2,3,5,20, 4,6,7,8,17,<br>22,23,24 18,19,21 | 10 | P00714,P06761,P07150,P20646,P22273,P22282,P23739,Q5QE79,Q6P6R2,Q9QX74                                                                                            |
| 825 | 1,2,3,5,21, 4,6,7,8,17,<br>22,23,24 18,19,20 | 23 | P02780,P06761,P06911,P07150,P08649,P11598,P12020,P20646,P22273,P22282,P22283,P30919,P36374,P46462,P47727,Q4G075,Q62714,Q63617,Q6P6R2,Q6RUV5,Q9QX74,Q9ROT3,Q9WTT6 |
| 826 | 1,2,3,6,7,8 4,5,19,20,<br>,17,18 21,22,23,24 | 7  | O54800;Q5DWW2,O70594,P20766,P38918,P97580,P97615,Q63598                                                                                                          |
| 827 | 1,2,3,6,7,8 4,5,18,20,<br>,17,19 21,22,23,24 | 6  | iRT-Kit_WR_fusion,O54800;Q5DWW2,O70594,P50115,P97580,Q66H69                                                                                                      |
| 828 | 1,2,3,6,7,8 4,5,18,19,<br>,17,20 21,22,23,24 | 15 | D4A5U3,iRT-Kit_WR_fusion,O54800;Q5DWW2,O70417,P05964,P06911,P12020,P13676,P19629,P31044,P50280,P55091,P63029,Q5GRG2,Q9JHB9                                       |
| 829 | 1,2,3,6,7,8 4,5,18,19,<br>,17,21 20,22,23,24 | 9  | iRT-Kit_WR_fusion,O54800;Q5DWW2,O70594,P02631,P04762,P05539,P19629,Q00715,Q63598                                                                                 |
| 830 | 1,2,3,6,7,8 4,5,18,19,<br>,17,22 20,21,23,24 | 11 | iRT-Kit_WR_fusion,O54800;Q5DWW2,P01946,P02091,P15399,P23593,P35280,P97580,Q09030,Q30KJ2,Q63598                                                                   |
| 831 | 1,2,3,6,7,8 4,5,18,19,<br>,17,23 20,21,22,24 | 8  | iRT-Kit_WR_fusion,O70594,P19629,P38918,P46720,Q09030,Q63598,Q99MH3                                                                                               |
| 832 | 1,2,3,6,7,8 4,5,18,19,<br>,17,24 20,21,22,23 | 5  | iRT-Kit_WR_fusion,O54800;Q5DWW2,O70594,P23593,Q63598                                                                                                             |
| 833 | 1,2,3,6,7,8 4,5,17,20,<br>,18,19 21,22,23,24 | 8  | iRT-Kit_WR_fusion,O54800;Q5DWW2,P19629,P20766,P31044,P97580,P97615,Q66H69                                                                                        |

|     |                       |                               |                                                                                                                                                            |
|-----|-----------------------|-------------------------------|------------------------------------------------------------------------------------------------------------------------------------------------------------|
| 834 | 1,2,3,6,7,8<br>,18,20 | 4,5,17,19,<br>21,22,23,2<br>4 | iRT-<br>13 Kit_WR_fusion,O54800;Q5DWV2,P06911,P12020,P19629,P20766,P31044,P50280,P69897,P9761<br>5,Q5GRG2,Q91ZS3,Q9JHB9                                    |
| 835 | 1,2,3,6,7,8<br>,18,21 | 4,5,17,19,<br>20,22,23,2<br>4 | iRT-<br>12 Kit_WR_fusion,O54800;Q5DWV2,O70594,P02625,P02631,P18757,P19629,P20766,P46844,Q007<br>15,Q63598,Q91ZS3                                           |
| 836 | 1,2,3,6,7,8<br>,18,22 | 4,5,17,19,<br>20,21,23,2<br>4 | iRT-<br>12 Kit_WR_fusion,O54800;Q5DWV2,P15399,P19629,P20766,P23593,P35280,P80202,P97580,Q090<br>30,Q30KJ2,Q91ZS3                                           |
| 837 | 1,2,3,6,7,8<br>,18,23 | 4,5,17,19,<br>20,21,22,2<br>4 | iRT-<br>16 Kit_WR_fusion,O54800;Q5DWV2,O70594,P19629,P20766,P38918,P46844,P80202,Q09030,Q3Z<br>AV1,Q62894,Q63532,Q63598,Q91ZS3,Q99MH3,Q9WTW7               |
| 838 | 1,2,3,6,7,8<br>,18,24 | 4,5,17,19,<br>20,21,22,2<br>3 | 7 O54800;Q5DWV2,P20766,P46844,P97615,Q3ZAV1,Q63598,Q91ZS3                                                                                                  |
| 839 | 1,2,3,6,7,8<br>,19,20 | 4,5,17,18,<br>21,22,23,2<br>4 | iRT-<br>12 Kit_WR_fusion,P06911,P12020,P19629,P31044,P50280,Q5GRG2,Q66H69,Q68G31,Q6P9T8,Q9JI<br>85,Q9QW07                                                  |
| 840 | 1,2,3,6,7,8<br>,19,21 | 4,5,17,18,<br>20,22,23,2<br>4 | 8 iRT-Kit_WR_fusion,P02631,P11883,P19629,P97580,Q00715,Q66H69,Q9JI85                                                                                       |
| 841 | 1,2,3,6,7,8<br>,19,22 | 4,5,17,18,<br>20,21,23,2<br>4 | 6 iRT-Kit_WR_fusion,P15399,P19629,P35280,P97580,Q30KJ2                                                                                                     |
| 842 | 1,2,3,6,7,8<br>,19,23 | 4,5,17,18,<br>20,21,22,2<br>4 | 8 iRT-Kit_WR_fusion,O70594,P19629,P42854,P97580,Q09030,Q99MH3,Q9Z0J6                                                                                       |
| 843 | 1,2,3,6,7,8<br>,19,24 | 4,5,17,18,<br>20,21,22,2<br>3 | 3 iRT-Kit_WR_fusion,Q66H69,Q68G31                                                                                                                          |
| 844 | 1,2,3,6,7,8<br>,20,21 | 4,5,17,18,<br>19,22,23,2<br>4 | D4A5U3,iRT-<br>19 Kit_WR_fusion,P01835,P02631,P05964,P06911,P12020,P19629,P31044,P47967,P50280,Q00715,<br>Q5GRG2,Q5RKI1,Q78P75,Q812E4,Q91ZS3,Q9JHB9,Q9JI85 |
| 845 | 1,2,3,6,7,8<br>,20,22 | 4,5,17,18,<br>19,21,23,2<br>4 | iRT-<br>14 Kit_WR_fusion,O54800;Q5DWV2,P06911,P12020,P15399,P19629,P23593,P31044,P35280,P5028<br>0,P97580,Q5GRG2,Q6P9T8,Q91ZS3                             |
| 846 | 1,2,3,6,7,8<br>,20,23 | 4,5,17,18,<br>19,21,22,2<br>4 | iRT-<br>12 Kit_WR_fusion,P06911,P09656,P12020,P19629,P31044,P50280,Q05702,Q09030,Q5GRG2,Q6289<br>4,Q99MH3                                                  |

|     |                        |                               |                                                                                                                         |
|-----|------------------------|-------------------------------|-------------------------------------------------------------------------------------------------------------------------|
| 847 | 1,2,3,6,7,8<br>,20,24  | 4,5,17,18,<br>19,21,22,2<br>3 | 10 iRT-Kit_WR_fusion,P06911,P12020,P19629,P31044,P50280,Q5GRG2,Q91ZS3,Q9JHB9,Q9QW07                                     |
| 848 | 1,2,3,6,7,8<br>,21,22  | 4,5,17,18,<br>19,20,23,2<br>4 | 8 iRT-Kit_WR_fusion,P02631,P11883,P19629,P35280,P97580,Q09030,Q62714                                                    |
| 849 | 1,2,3,6,7,8<br>,21,23  | 4,5,17,18,<br>19,20,22,2<br>4 | iRT-<br>12 Kit_WR_fusion,O70594,P02631,P02783,P09656,P19629,P46844,Q09030,Q62714,Q63532,Q6359<br>8,Q99MH3               |
| 850 | 1,2,3,6,7,8<br>,21,24  | 4,5,17,18,<br>19,20,22,2<br>3 | iRT-<br>11 Kit_WR_fusion,P02625,P02631,P04762,P19629,P30919,P36860,P46844,Q09030,Q62714,Q63598                          |
| 851 | 1,2,3,6,7,8<br>,22,23  | 4,5,17,18,<br>19,20,21,2<br>4 | iRT-<br>14 Kit_WR_fusion,P02783,P09656,P19629,P23593,P35280,P80202,P97580,Q09030,Q62714,Q62894<br>,Q63532,Q63598,Q99MH3 |
| 852 | 1,2,3,6,7,8<br>,22,24  | 4,5,17,18,<br>19,20,21,2<br>3 | iRT-<br>10 Kit_WR_fusion,O54800;Q5DWV2,P15399,P23593,P35280,P97580,Q09030,Q62714,Q63598,Q6P<br>6R2                      |
| 853 | 1,2,3,6,7,8<br>,23,24  | 4,5,17,18,<br>19,20,21,2<br>2 | iRT-<br>11 Kit_WR_fusion,P19629,P46844,P80202,Q09030,Q3ZAV1,Q62714,Q63532,Q63598,Q6P6R2,Q99<br>MH3                      |
| 854 | 1,2,3,6,7,1<br>7,18,19 | 4,5,8,20,2<br>1,22,23,24      | 2 O54800;Q5DWV2,P20766                                                                                                  |
| 855 | 1,2,3,6,7,1<br>7,18,20 | 4,5,8,19,2<br>1,22,23,24      | 4 O54800;Q5DWV2,P55091,P63029,Q5GRG2                                                                                    |
| 856 | 1,2,3,6,7,1<br>7,18,21 | 4,5,8,19,2<br>0,22,23,24      | 4 O54800;Q5DWV2,P01835,P05539,P23739                                                                                    |
| 857 | 1,2,3,6,7,1<br>7,18,22 | 4,5,8,19,2<br>0,21,23,24      | 4 O54800;Q5DWV2,P01946,P02091,P23739                                                                                    |
| 858 | 1,2,3,6,7,1<br>7,18,23 | 4,5,8,19,2<br>0,21,22,24      | 5 O54800;Q5DWV2,O70594,P20766,Q63598,Q99MH3                                                                             |
| 859 | 1,2,3,6,7,1<br>7,18,24 | 4,5,8,19,2<br>0,21,22,23      | 5 O54800;Q5DWV2,P01039,P20766,Q63598,Q6AY61                                                                             |
| 860 | 1,2,3,6,7,1<br>7,19,20 | 4,5,8,18,2<br>1,22,23,24      | 2 O89117,P63029                                                                                                         |
| 861 | 1,2,3,6,7,1<br>7,19,21 | 4,5,8,18,2<br>0,22,23,24      | 4 P05539,Q5QE79,Q6AY61,Q9R168                                                                                           |
| 862 | 1,2,3,6,7,1<br>7,19,22 | 4,5,8,18,2<br>0,21,23,24      | 4 O89117,P01946,P02091,Q9R168                                                                                           |
| 863 | 1,2,3,6,7,1<br>7,19,23 | 4,5,8,18,2<br>0,21,22,24      | 0                                                                                                                       |

|     |                        |                          |   |                                                  |
|-----|------------------------|--------------------------|---|--------------------------------------------------|
| 864 | 1,2,3,6,7,1<br>7,19,24 | 4,5,8,18,2<br>0,21,22,23 | 2 | P54921,Q6AY61                                    |
| 865 | 1,2,3,6,7,1<br>7,20,21 | 4,5,8,18,1<br>9,22,23,24 | 6 | P01835,P05539,P05964,P19629,P63029,Q6AY61        |
| 866 | 1,2,3,6,7,1<br>7,20,22 | 4,5,8,18,1<br>9,21,23,24 | 5 | O54800;Q5DWV2,O89117,P01946,P02091,P63029        |
| 867 | 1,2,3,6,7,1<br>7,20,23 | 4,5,8,18,1<br>9,21,22,24 | 3 | P63029,Q62894,Q99MH3                             |
| 868 | 1,2,3,6,7,1<br>7,20,24 | 4,5,8,18,1<br>9,21,22,23 | 3 | O54800;Q5DWV2,P63029,Q6AY61                      |
| 869 | 1,2,3,6,7,1<br>7,21,22 | 4,5,8,18,1<br>9,20,23,24 | 5 | P01835,P01946,P02091,P05539,Q9R168               |
| 870 | 1,2,3,6,7,1<br>7,21,23 | 4,5,8,18,1<br>9,20,22,24 | 3 | P01835,P09656,Q9R168                             |
| 871 | 1,2,3,6,7,1<br>7,21,24 | 4,5,8,18,1<br>9,20,22,23 | 7 | P01039,P01835,P04762,P05539,P36860,Q6AY61,Q9R168 |
| 872 | 1,2,3,6,7,1<br>7,22,23 | 4,5,8,18,1<br>9,20,21,24 | 5 | P01946,P02091,P02783,Q99MH3,Q9R168               |
| 873 | 1,2,3,6,7,1<br>7,22,24 | 4,5,8,18,1<br>9,20,21,23 | 4 | O54800;Q5DWV2,P01946,P02091,Q9R168               |
| 874 | 1,2,3,6,7,1<br>7,23,24 | 4,5,8,18,1<br>9,20,21,22 | 1 | Q63598                                           |
| 875 | 1,2,3,6,7,1<br>8,19,20 | 4,5,8,17,2<br>1,22,23,24 | 2 | O54800;Q5DWV2,P20766                             |
| 876 | 1,2,3,6,7,1<br>8,19,21 | 4,5,8,17,2<br>0,22,23,24 | 3 | O54800;Q5DWV2,P20766,P23739                      |
| 877 | 1,2,3,6,7,1<br>8,19,22 | 4,5,8,17,2<br>0,21,23,24 | 3 | O54800;Q5DWV2,P20766,P23739                      |
| 878 | 1,2,3,6,7,1<br>8,19,23 | 4,5,8,17,2<br>0,21,22,24 | 3 | O54800;Q5DWV2,P20766,Q99MH3                      |
| 879 | 1,2,3,6,7,1<br>8,19,24 | 4,5,8,17,2<br>0,21,22,23 | 2 | O54800;Q5DWV2,P20766                             |
| 880 | 1,2,3,6,7,1<br>8,20,21 | 4,5,8,17,1<br>9,22,23,24 | 4 | O54800;Q5DWV2,P01835,P19629,P47967               |
| 881 | 1,2,3,6,7,1<br>8,20,22 | 4,5,8,17,1<br>9,21,23,24 | 2 | O54800;Q5DWV2,P01835                             |
| 882 | 1,2,3,6,7,1<br>8,20,23 | 4,5,8,17,1<br>9,21,22,24 | 5 | O54800;Q5DWV2,P01835,P20766,Q62894,Q99MH3        |
| 883 | 1,2,3,6,7,1<br>8,20,24 | 4,5,8,17,1<br>9,21,22,23 | 3 | O54800;Q5DWV2,P01835,P20766                      |

|     |                        |                          |   |                                                                       |
|-----|------------------------|--------------------------|---|-----------------------------------------------------------------------|
| 884 | 1,2,3,6,7,1<br>8,21,22 | 4,5,8,17,1<br>9,20,23,24 | 3 | O54800;Q5DWV2,P01835,P23739                                           |
| 885 | 1,2,3,6,7,1<br>8,21,23 | 4,5,8,17,1<br>9,20,22,24 | 5 | O54800;Q5DWV2,P01835,P09656,P20766,Q99MH3                             |
| 886 | 1,2,3,6,7,1<br>8,21,24 | 4,5,8,17,1<br>9,20,22,23 | 4 | O54800;Q5DWV2,P01835,P20766,P23739                                    |
| 887 | 1,2,3,6,7,1<br>8,22,23 | 4,5,8,17,1<br>9,20,21,24 | 9 | O54800;Q5DWV2,P01835,P02783,P06760,P30120,P36374,Q6P6R2,Q99MH3,Q9EQSO |
| 888 | 1,2,3,6,7,1<br>8,22,24 | 4,5,8,17,1<br>9,20,21,23 | 6 | O54800;Q5DWV2,P01835,P06760,P20766,P23739,Q6P6R2                      |
| 889 | 1,2,3,6,7,1<br>8,23,24 | 4,5,8,17,1<br>9,20,21,22 | 7 | O54800;Q5DWV2,P01835,P06760,P20766,Q63598,Q6P6R2,Q99MH3               |
| 890 | 1,2,3,6,7,1<br>9,20,21 | 4,5,8,17,1<br>8,22,23,24 | 5 | P01835,P05369,P19629,P47967,Q63617                                    |
| 891 | 1,2,3,6,7,1<br>9,20,22 | 4,5,8,17,1<br>8,21,23,24 | 0 |                                                                       |
| 892 | 1,2,3,6,7,1<br>9,20,23 | 4,5,8,17,1<br>8,21,22,24 | 1 | P19629                                                                |
| 893 | 1,2,3,6,7,1<br>9,20,24 | 4,5,8,17,1<br>8,21,22,23 | 1 | Q68G31                                                                |
| 894 | 1,2,3,6,7,1<br>9,21,22 | 4,5,8,17,1<br>8,20,23,24 | 3 | P01835,P01946,Q9R168                                                  |
| 895 | 1,2,3,6,7,1<br>9,21,23 | 4,5,8,17,1<br>8,20,22,24 | 1 | P01835                                                                |
| 896 | 1,2,3,6,7,1<br>9,21,24 | 4,5,8,17,1<br>8,20,22,23 | 2 | P01835,Q6AY61                                                         |
| 897 | 1,2,3,6,7,1<br>9,22,23 | 4,5,8,17,1<br>8,20,21,24 | 2 | P02783,Q99MH3                                                         |
| 898 | 1,2,3,6,7,1<br>9,22,24 | 4,5,8,17,1<br>8,20,21,23 | 0 |                                                                       |
| 899 | 1,2,3,6,7,1<br>9,23,24 | 4,5,8,17,1<br>8,20,21,22 | 0 |                                                                       |
| 900 | 1,2,3,6,7,2<br>0,21,22 | 4,5,8,17,1<br>8,19,23,24 | 2 | P01835,P19629                                                         |
| 901 | 1,2,3,6,7,2<br>0,21,23 | 4,5,8,17,1<br>8,19,22,24 | 3 | P01835,P09656,P19629                                                  |
| 902 | 1,2,3,6,7,2<br>0,21,24 | 4,5,8,17,1<br>8,19,22,23 | 3 | P01835,P04762,Q6AY61                                                  |
| 903 | 1,2,3,6,7,2<br>0,22,23 | 4,5,8,17,1<br>8,19,21,24 | 6 | P01835,P02783,P09656,P19629,Q62894,Q99MH3                             |



|     |                        |                          |   |                                                                |
|-----|------------------------|--------------------------|---|----------------------------------------------------------------|
| 904 | 1,2,3,6,7,2<br>0,22,24 | 4,5,8,17,1<br>8,19,21,23 | 3 | P01835,P22006,Q9QX74                                           |
| 905 | 1,2,3,6,7,2<br>0,23,24 | 4,5,8,17,1<br>8,19,21,22 | 4 | P01835,P09656,Q62894,Q9QX74                                    |
| 906 | 1,2,3,6,7,2<br>1,22,23 | 4,5,8,17,1<br>8,19,20,24 | 7 | P01835,P02783,P09656,Q09030,Q62714,Q99MH3,Q9R168               |
| 907 | 1,2,3,6,7,2<br>1,22,24 | 4,5,8,17,1<br>8,19,20,23 | 3 | P01835,Q62714,Q9R168                                           |
| 908 | 1,2,3,6,7,2<br>1,23,24 | 4,5,8,17,1<br>8,19,20,22 | 4 | P01835,P09656,P36860,Q62714                                    |
| 909 | 1,2,3,6,7,2<br>2,23,24 | 4,5,8,17,1<br>8,19,20,21 | 9 | P01835,P02783,P06760,P09656,Q09030,Q62714,Q6P6R2,Q99MH3,Q9QX74 |
| 910 | 1,2,3,6,8,1<br>7,18,19 | 4,5,7,20,2<br>1,22,23,24 | 5 | O54800;Q5DWV2,P08649,P97580,P97615,Q06000                      |
| 911 | 1,2,3,6,8,1<br>7,18,20 | 4,5,7,19,2<br>1,22,23,24 | 7 | O54800;Q5DWV2,P06911,P08649,P12020,P55091,P63029,Q5GRG2        |
| 912 | 1,2,3,6,8,1<br>7,18,21 | 4,5,7,19,2<br>0,22,23,24 | 2 | O54800;Q5DWV2,P97580                                           |
| 913 | 1,2,3,6,8,1<br>7,18,22 | 4,5,7,19,2<br>0,21,23,24 | 7 | O54800;Q5DWV2,P01946,P02091,P08649,P15399,P97580,Q30KJ2        |
| 914 | 1,2,3,6,8,1<br>7,18,23 | 4,5,7,19,2<br>0,21,22,24 | 5 | O54800;Q5DWV2,O70594,P97580,Q63598,Q99MH3                      |
| 915 | 1,2,3,6,8,1<br>7,18,24 | 4,5,7,19,2<br>0,21,22,23 | 2 | O54800;Q5DWV2,Q63598                                           |
| 916 | 1,2,3,6,8,1<br>7,19,20 | 4,5,7,18,2<br>1,22,23,24 | 7 | O89117,P06911,P63029,P97580,Q5GRG2,Q68G31,Q9JI85               |
| 917 | 1,2,3,6,8,1<br>7,19,21 | 4,5,7,18,2<br>0,22,23,24 | 4 | P97580,Q66H69,Q68G31,Q9WVK7                                    |
| 918 | 1,2,3,6,8,1<br>7,19,22 | 4,5,7,18,2<br>0,21,23,24 | 6 | O89117,P01946,P02091,P15399,P97580,Q30KJ2                      |
| 919 | 1,2,3,6,8,1<br>7,19,23 | 4,5,7,18,2<br>0,21,22,24 | 2 | P97580,Q99MH3                                                  |
| 920 | 1,2,3,6,8,1<br>7,19,24 | 4,5,7,18,2<br>0,21,22,23 | 3 | P97580,P97840,Q68G31                                           |
| 921 | 1,2,3,6,8,1<br>7,20,21 | 4,5,7,18,1<br>9,22,23,24 | 6 | D4A5U3,P06911,P19629,P63029,Q5GRG2,Q9JI85                      |
| 922 | 1,2,3,6,8,1<br>7,20,22 | 4,5,7,18,1<br>9,21,23,24 | 9 | O89117,P01946,P02091,P06911,P12020,P15399,P63029,P97580,Q5GRG2 |
| 923 | 1,2,3,6,8,1<br>7,20,23 | 4,5,7,18,1<br>9,21,22,24 | 7 | P06911,P17559,P19629,P36376,P63029,Q5GRG2,Q99MH3               |

|     |                        |                          |    |                                                                              |
|-----|------------------------|--------------------------|----|------------------------------------------------------------------------------|
| 924 | 1,2,3,6,8,1<br>7,20,24 | 4,5,7,18,1<br>9,21,22,23 | 4  | P06911,P63029,Q5GRG2,Q68G31                                                  |
| 925 | 1,2,3,6,8,1<br>7,21,22 | 4,5,7,18,1<br>9,20,23,24 | 3  | P01946,P02091,P97580                                                         |
| 926 | 1,2,3,6,8,1<br>7,21,23 | 4,5,7,18,1<br>9,20,22,24 | 3  | P09656,Q09030,Q99MH3                                                         |
| 927 | 1,2,3,6,8,1<br>7,21,24 | 4,5,7,18,1<br>9,20,22,23 | 0  |                                                                              |
| 928 | 1,2,3,6,8,1<br>7,22,23 | 4,5,7,18,1<br>9,20,21,24 | 8  | P01946,P02091,P02783,P97580,P97840,Q09030,Q63532,Q99MH3                      |
| 929 | 1,2,3,6,8,1<br>7,22,24 | 4,5,7,18,1<br>9,20,21,23 | 6  | P01946,P02091,P15399,P23593,P97580,P97840                                    |
| 930 | 1,2,3,6,8,1<br>7,23,24 | 4,5,7,18,1<br>9,20,21,22 | 4  | P97840,Q09030,Q63598,Q99MH3                                                  |
| 931 | 1,2,3,6,8,1<br>8,19,20 | 4,5,7,17,2<br>1,22,23,24 | 10 | O54800;Q5DWV2,P12020,P15399,P50280,P97580,P97615,Q5GRG2,Q68G31,Q9JI85,Q9R168 |
| 932 | 1,2,3,6,8,1<br>8,19,21 | 4,5,7,17,2<br>0,22,23,24 | 4  | O54800;Q5DWV2,P97580,Q66H69,Q68G31                                           |
| 933 | 1,2,3,6,8,1<br>8,19,22 | 4,5,7,17,2<br>0,21,23,24 | 4  | O54800;Q5DWV2,P15399,P97580,Q30KJ2                                           |
| 934 | 1,2,3,6,8,1<br>8,19,23 | 4,5,7,17,2<br>0,21,22,24 | 4  | O54800;Q5DWV2,P97580,Q99MH3,Q9Z0J6                                           |
| 935 | 1,2,3,6,8,1<br>8,19,24 | 4,5,7,17,2<br>0,21,22,23 | 3  | O54800;Q5DWV2,P97580,Q68G31                                                  |
| 936 | 1,2,3,6,8,1<br>8,20,21 | 4,5,7,17,1<br>9,22,23,24 | 9  | O54800;Q5DWV2,P02631,P12020,P19629,P25809,Q5GRG2,Q68G31,Q91ZS3,Q9JI85        |
| 937 | 1,2,3,6,8,1<br>8,20,22 | 4,5,7,17,1<br>9,21,23,24 | 8  | O54800;Q5DWV2,P12020,P15399,P97580,Q30KJ2,Q5GRG2,Q91ZS3,Q99MH3               |
| 938 | 1,2,3,6,8,1<br>8,20,23 | 4,5,7,17,1<br>9,21,22,24 | 6  | O54800;Q5DWV2,P19629,P36376,Q5GRG2,Q99MH3,Q9R168                             |
| 939 | 1,2,3,6,8,1<br>8,20,24 | 4,5,7,17,1<br>9,21,22,23 | 6  | O54800;Q5DWV2,P12020,Q5GRG2,Q68G31,Q91ZS3,Q9R168                             |
| 940 | 1,2,3,6,8,1<br>8,21,22 | 4,5,7,17,1<br>9,20,23,24 | 6  | O54800;Q5DWV2,P02625,P23739,P54921,P97580,Q30KJ2                             |
| 941 | 1,2,3,6,8,1<br>8,21,23 | 4,5,7,17,1<br>9,20,22,24 | 6  | O54800;Q5DWV2,P09656,P54921,Q63532,Q99MH3,Q9Z0J6                             |
| 942 | 1,2,3,6,8,1<br>8,21,24 | 4,5,7,17,1<br>9,20,22,23 | 3  | O54800;Q5DWV2,P02625,Q68G31                                                  |
| 943 | 1,2,3,6,8,1<br>8,22,23 | 4,5,7,17,1<br>9,20,21,24 | 10 | O54800;Q5DWV2,P02783,P36374,P54921,P80202,P97580,Q09030,Q30KJ2,Q63532,Q99MH3 |

|     |                        |                          |   |                                                                |
|-----|------------------------|--------------------------|---|----------------------------------------------------------------|
| 944 | 1,2,3,6,8,1<br>8,22,24 | 4,5,7,17,1<br>9,20,21,23 | 7 | O54800;Q5DWV2,P06760,P15399,P20646,P97580,Q30KJ2,Q6P6R2        |
| 945 | 1,2,3,6,8,1<br>8,23,24 | 4,5,7,17,1<br>9,20,21,22 | 6 | O54800;Q5DWV2,P06760,P20646,Q63598,Q99MH3,Q9Z0J6               |
| 946 | 1,2,3,6,8,1<br>9,20,21 | 4,5,7,17,1<br>8,22,23,24 | 5 | P05369,P19629,Q5GRG2,Q68G31,Q9JI85                             |
| 947 | 1,2,3,6,8,1<br>9,20,22 | 4,5,7,17,1<br>8,21,23,24 | 5 | P15399,P19629,P97580,Q5GRG2,Q68G31                             |
| 948 | 1,2,3,6,8,1<br>9,20,23 | 4,5,7,17,1<br>8,21,22,24 | 4 | P19629,P36376,Q68G31,Q99MH3                                    |
| 949 | 1,2,3,6,8,1<br>9,20,24 | 4,5,7,17,1<br>8,21,22,23 | 4 | P15399,Q5GRG2,Q68G31,Q9JI85                                    |
| 950 | 1,2,3,6,8,1<br>9,21,22 | 4,5,7,17,1<br>8,20,23,24 | 5 | P01946,P02091,P15399,P30919,P97580                             |
| 951 | 1,2,3,6,8,1<br>9,21,23 | 4,5,7,17,1<br>8,20,22,24 | 1 | Q9Z0J6                                                         |
| 952 | 1,2,3,6,8,1<br>9,21,24 | 4,5,7,17,1<br>8,20,22,23 | 2 | P30919,Q68G31                                                  |
| 953 | 1,2,3,6,8,1<br>9,22,23 | 4,5,7,17,1<br>8,20,21,24 | 8 | P00507,P01946,P02783,P15399,P97580,Q63532,Q99MH3,Q9Z0J6        |
| 954 | 1,2,3,6,8,1<br>9,22,24 | 4,5,7,17,1<br>8,20,21,23 | 5 | P00507,P15399,P30919,P97580,Q68G31                             |
| 955 | 1,2,3,6,8,1<br>9,23,24 | 4,5,7,17,1<br>8,20,21,22 | 2 | Q68G31,Q9Z0J6                                                  |
| 956 | 1,2,3,6,8,2<br>0,21,22 | 4,5,7,17,1<br>8,19,23,24 | 3 | P15399,P19629,P97580                                           |
| 957 | 1,2,3,6,8,2<br>0,21,23 | 4,5,7,17,1<br>8,19,22,24 | 3 | P09656,P19629,Q99MH3                                           |
| 958 | 1,2,3,6,8,2<br>0,21,24 | 4,5,7,17,1<br>8,19,22,23 | 4 | P19629,Q5GRG2,Q68G31,Q9JI85                                    |
| 959 | 1,2,3,6,8,2<br>0,22,23 | 4,5,7,17,1<br>8,19,21,24 | 9 | P02783,P09656,P15399,P19629,P36376,P97580,Q09030,Q63532,Q99MH3 |
| 960 | 1,2,3,6,8,2<br>0,22,24 | 4,5,7,17,1<br>8,19,21,23 | 4 | P12020,P15399,P97580,Q5GRG2                                    |
| 961 | 1,2,3,6,8,2<br>0,23,24 | 4,5,7,17,1<br>8,19,21,22 | 3 | P09656,P19629,Q99MH3                                           |
| 962 | 1,2,3,6,8,2<br>1,22,23 | 4,5,7,17,1<br>8,19,20,24 | 9 | P02783,P09656,P30919,P54921,P97580,Q09030,Q62714,Q63532,Q99MH3 |
| 963 | 1,2,3,6,8,2<br>1,22,24 | 4,5,7,17,1<br>8,19,20,23 | 3 | P30919,P97580,Q62714                                           |

|     |                         |                          |    |                                                                                                                        |
|-----|-------------------------|--------------------------|----|------------------------------------------------------------------------------------------------------------------------|
| 964 | 1,2,3,6,8,2<br>1,23,24  | 4,5,7,17,1<br>8,19,20,22 | 7  | P09656,P20646,P30919,Q09030,Q62714,Q63532,Q9Z0J6                                                                       |
| 965 | 1,2,3,6,8,2<br>2,23,24  | 4,5,7,17,1<br>8,19,20,21 | 14 | P00507,P02783,P06760,P09656,P20646,P30919,P80202,P97580,P97840,Q09030,Q62714,Q63532,Q6P6R2,Q99MH3                      |
| 966 | 1,2,3,6,17,<br>18,19,20 | 4,5,7,8,21,<br>22,23,24  | 4  | O54800;Q5DWV2,P39069,P63029,Q06000                                                                                     |
| 967 | 1,2,3,6,17,<br>18,19,21 | 4,5,7,8,20,<br>22,23,24  | 3  | O54800;Q5DWV2,P23739,Q4G075                                                                                            |
| 968 | 1,2,3,6,17,<br>18,19,22 | 4,5,7,8,20,<br>21,23,24  | 6  | O54800;Q5DWV2,P01946,P02091,P06760,P22273,Q06000                                                                       |
| 969 | 1,2,3,6,17,<br>18,19,23 | 4,5,7,8,20,<br>21,22,24  | 4  | O54800;Q5DWV2,P06760,P22273,Q99MH3                                                                                     |
| 970 | 1,2,3,6,17,<br>18,19,24 | 4,5,7,8,20,<br>21,22,23  | 3  | O54800;Q5DWV2,P06760,Q4G075                                                                                            |
| 971 | 1,2,3,6,17,<br>18,20,21 | 4,5,7,8,19,<br>22,23,24  | 2  | O54800;Q5DWV2,P63029                                                                                                   |
| 972 | 1,2,3,6,17,<br>18,20,22 | 4,5,7,8,19,<br>21,23,24  | 5  | O54800;Q5DWV2,P01946,P02091,P06760,P63029                                                                              |
| 973 | 1,2,3,6,17,<br>18,20,23 | 4,5,7,8,19,<br>21,22,24  | 4  | O54800;Q5DWV2,P06760,P63029,Q99MH3                                                                                     |
| 974 | 1,2,3,6,17,<br>18,20,24 | 4,5,7,8,19,<br>21,22,23  | 3  | O54800;Q5DWV2,P06760,P63029                                                                                            |
| 975 | 1,2,3,6,17,<br>18,21,22 | 4,5,7,8,19,<br>20,23,24  | 5  | O54800;Q5DWV2,P01946,P02091,P23739,Q4G075                                                                              |
| 976 | 1,2,3,6,17,<br>18,21,23 | 4,5,7,8,19,<br>20,22,24  | 3  | O54800;Q5DWV2,Q4G075,Q99MH3                                                                                            |
| 977 | 1,2,3,6,17,<br>18,21,24 | 4,5,7,8,19,<br>20,22,23  | 2  | O54800;Q5DWV2,Q4G075                                                                                                   |
| 978 | 1,2,3,6,17,<br>18,22,23 | 4,5,7,8,19,<br>20,21,24  | 16 | O54800;Q5DWV2,P01946,P02091,P02780,P02783,P06760,P22273,P22282,P30120,P36374,P55159,Q63617,Q812E4,Q99MH3,Q9EQS0,Q9WTT6 |
| 979 | 1,2,3,6,17,<br>18,22,24 | 4,5,7,8,19,<br>20,21,23  | 9  | D3ZUC6,O54800;Q5DWV2,P01946,P02091,P06760,P22273,Q4G075,Q63617,Q9WTT6                                                  |
| 980 | 1,2,3,6,17,<br>18,23,24 | 4,5,7,8,19,<br>20,21,22  | 8  | O54800;Q5DWV2,P02780,P06760,P22273,Q4G075,Q63617,Q99MH3,Q9WTT6                                                         |
| 981 | 1,2,3,6,17,<br>19,20,21 | 4,5,7,8,18,<br>22,23,24  | 4  | P49134,P63029,Q68G31,Q9WVK7                                                                                            |
| 982 | 1,2,3,6,17,<br>19,20,22 | 4,5,7,8,18,<br>21,23,24  | 4  | O89117,P01946,P02091,P63029                                                                                            |
| 983 | 1,2,3,6,17,<br>19,20,23 | 4,5,7,8,18,<br>21,22,24  | 2  | O89117,P63029                                                                                                          |

|      |                                              |                                                                                                                               |
|------|----------------------------------------------|-------------------------------------------------------------------------------------------------------------------------------|
| 984  | 1,2,3,6,17, 4,5,7,8,18,<br>19,20,24 21,22,23 | 3 O89117,P63029,Q68G31                                                                                                        |
| 985  | 1,2,3,6,17, 4,5,7,8,18,<br>19,21,22 20,23,24 | 3 P01946,P02091,Q4G075                                                                                                        |
| 986  | 1,2,3,6,17, 4,5,7,8,18,<br>19,21,23 20,22,24 | 1 Q4G075                                                                                                                      |
| 987  | 1,2,3,6,17, 4,5,7,8,18,<br>19,21,24 20,22,23 | 3 Q4G075,Q68G31,Q6AY61                                                                                                        |
| 988  | 1,2,3,6,17, 4,5,7,8,18,<br>19,22,23 20,21,24 | 7 O89117,P01946,P02091,P02783,P06760,P22273,Q99MH3                                                                            |
| 989  | 1,2,3,6,17, 4,5,7,8,18,<br>19,22,24 20,21,23 | 7 D3ZUC6,O89117,P01946,P02091,P06760,P22273,Q4G075                                                                            |
| 990  | 1,2,3,6,17, 4,5,7,8,18,<br>19,23,24 20,21,22 | 3 P06760,P22273,Q4G075                                                                                                        |
| 991  | 1,2,3,6,17, 4,5,7,8,18,<br>20,21,22 19,23,24 | 3 P01946,P02091,P63029                                                                                                        |
| 992  | 1,2,3,6,17, 4,5,7,8,18,<br>20,21,23 19,22,24 | 2 P09656,P63029                                                                                                               |
| 993  | 1,2,3,6,17, 4,5,7,8,18,<br>20,21,24 19,22,23 | 2 P63029,Q6AY61                                                                                                               |
| 994  | 1,2,3,6,17, 4,5,7,8,18,<br>20,22,23 19,21,24 | 8 O89117,P01946,P02091,P02783,P06760,P09656,P63029,Q99MH3                                                                     |
| 995  | 1,2,3,6,17, 4,5,7,8,18,<br>20,22,24 19,21,23 | 5 O89117,P01946,P02091,P06760,P63029                                                                                          |
| 996  | 1,2,3,6,17, 4,5,7,8,18,<br>20,23,24 19,21,22 | 2 P06760,P63029                                                                                                               |
| 997  | 1,2,3,6,17, 4,5,7,8,18,<br>21,22,23 19,20,24 | 8 P01946,P02091,P02783,P09656,P22282,Q4G075,Q99MH3,Q9R168                                                                     |
| 998  | 1,2,3,6,17, 4,5,7,8,18,<br>21,22,24 19,20,23 | 4 P01946,P02091,Q4G075,Q9R168                                                                                                 |
| 999  | 1,2,3,6,17, 4,5,7,8,18,<br>21,23,24 19,20,22 | 2 P09656,Q4G075                                                                                                               |
| 1000 | 1,2,3,6,17, 4,5,7,8,18,<br>22,23,24 19,20,21 | 17 D3ZUC6,P01946,P02091,P02780,P02783,P06760,P07150,P22273,P22282,P47967,P55159,P9784<br>0,Q4G075,Q5I0D1,Q63617,Q99MH3,Q9WTT6 |
| 1001 | 1,2,3,6,18, 4,5,7,8,17,<br>19,20,21 22,23,24 | 3 O54800;Q5DWV2,P39069,Q68G31                                                                                                 |
| 1002 | 1,2,3,6,18, 4,5,7,8,17,<br>19,20,22 21,23,24 | 3 O54800;Q5DWV2,P06760,P39069                                                                                                 |
| 1003 | 1,2,3,6,18, 4,5,7,8,17,<br>19,20,23 21,22,24 | 4 O54800;Q5DWV2,P06760,P39069,Q99MH3                                                                                          |

|      |                                              |    |                                                                                                                                          |
|------|----------------------------------------------|----|------------------------------------------------------------------------------------------------------------------------------------------|
| 1004 | 1,2,3,6,18, 4,5,7,8,17,<br>19,20,24 21,22,23 | 4  | O54800;Q5DWV2,P06760,Q68G31,Q9QX74                                                                                                       |
| 1005 | 1,2,3,6,18, 4,5,7,8,17,<br>19,21,22 20,23,24 | 4  | O54800;Q5DWV2,P01946,P23739,Q4G075                                                                                                       |
| 1006 | 1,2,3,6,18, 4,5,7,8,17,<br>19,21,23 20,22,24 | 3  | O54800;Q5DWV2,Q4G075,Q9Z0J6                                                                                                              |
| 1007 | 1,2,3,6,18, 4,5,7,8,17,<br>19,21,24 20,22,23 | 3  | O54800;Q5DWV2,Q4G075,Q68G31                                                                                                              |
| 1008 | 1,2,3,6,18, 4,5,7,8,17,<br>19,22,23 20,21,24 | 10 | O54800;Q5DWV2,P02783,P06760,P22273,Q4G075,Q811M5,Q99MH3,Q9EQS0,Q9QX74,Q9WT<br>T6                                                         |
| 1009 | 1,2,3,6,18, 4,5,7,8,17,<br>19,22,24 20,21,23 | 6  | O54800;Q5DWV2,P06760,P22273,Q4G075,Q9QX74,Q9WTT6                                                                                         |
| 1010 | 1,2,3,6,18, 4,5,7,8,17,<br>19,23,24 20,21,22 | 7  | O54800;Q5DWV2,P06760,P22273,Q4G075,Q9QX74,Q9WTT6,Q9Z0J6                                                                                  |
| 1011 | 1,2,3,6,18, 4,5,7,8,17,<br>20,21,22 19,23,24 | 2  | O54800;Q5DWV2,P01835                                                                                                                     |
| 1012 | 1,2,3,6,18, 4,5,7,8,17,<br>20,21,23 19,22,24 | 4  | O54800;Q5DWV2,P01835,P09656,Q99MH3                                                                                                       |
| 1013 | 1,2,3,6,18, 4,5,7,8,17,<br>20,21,24 19,22,23 | 3  | O54800;Q5DWV2,P01835,Q68G31                                                                                                              |
| 1014 | 1,2,3,6,18, 4,5,7,8,17,<br>20,22,23 19,21,24 | 7  | O54800;Q5DWV2,P02783,P04355,P06760,P09656,Q99MH3,Q9QX74                                                                                  |
| 1015 | 1,2,3,6,18, 4,5,7,8,17,<br>20,22,24 19,21,23 | 6  | O54800;Q5DWV2,P06760,P20646,P22006,Q9QX74,Q9Z0V6                                                                                         |
| 1016 | 1,2,3,6,18, 4,5,7,8,17,<br>20,23,24 19,21,22 | 6  | O54800;Q5DWV2,P06760,P20646,Q5QE79,Q99MH3,Q9QX74                                                                                         |
| 1017 | 1,2,3,6,18, 4,5,7,8,17,<br>21,22,23 19,20,24 | 11 | O54800;Q5DWV2,P01835,P02783,P09656,P13676,P20646,P36374,P54921,Q4G075,Q99MH3,Q<br>9WTT6                                                  |
| 1018 | 1,2,3,6,18, 4,5,7,8,17,<br>21,22,24 19,20,23 | 6  | O54800;Q5DWV2,P01835,P20646,P23739,Q4G075,Q9WTT6                                                                                         |
| 1019 | 1,2,3,6,18, 4,5,7,8,17,<br>21,23,24 19,20,22 | 7  | O54800;Q5DWV2,P01835,P09656,P20646,Q4G075,Q9WTT6,Q9Z0J6                                                                                  |
| 1020 | 1,2,3,6,18, 4,5,7,8,17,<br>22,23,24 19,20,21 | 18 | D4A5U3,O54800;Q5DWV2,P02783,P06760,P07150,P13676,P20646,P22273,P22282,P36374,P55<br>159,Q4G075,Q63617,Q6P6R2,Q99MH3,Q9EQS0,Q9QX74,Q9WTT6 |
| 1021 | 1,2,3,6,19, 4,5,7,8,17,<br>20,21,22 18,23,24 | 1  | P01946                                                                                                                                   |
| 1022 | 1,2,3,6,19, 4,5,7,8,17,<br>20,21,23 18,22,24 | 1  | P09656                                                                                                                                   |
| 1023 | 1,2,3,6,19, 4,5,7,8,17,<br>20,21,24 18,22,23 | 1  | Q68G31                                                                                                                                   |

|      |                                              |    |                                                                                                                 |
|------|----------------------------------------------|----|-----------------------------------------------------------------------------------------------------------------|
| 1024 | 1,2,3,6,19, 4,5,7,8,17,<br>20,22,23 18,21,24 | 5  | P02783,P06760,P09656,Q99MH3,Q9QX74                                                                              |
| 1025 | 1,2,3,6,19, 4,5,7,8,17,<br>20,22,24 18,21,23 | 5  | P06760,P22006,Q68G31,Q9QX74,Q9Z0V6                                                                              |
| 1026 | 1,2,3,6,19, 4,5,7,8,17,<br>20,23,24 18,21,22 | 3  | P06760,Q68G31,Q9QX74                                                                                            |
| 1027 | 1,2,3,6,19, 4,5,7,8,17,<br>21,22,23 18,20,24 | 7  | P01946,P02091,P02783,P09656,Q4G075,Q99MH3,Q9Z0J6                                                                |
| 1028 | 1,2,3,6,19, 4,5,7,8,17,<br>21,22,24 18,20,23 | 5  | P01946,P02091,P30919,Q4G075,Q9WTT6                                                                              |
| 1029 | 1,2,3,6,19, 4,5,7,8,17,<br>21,23,24 18,20,22 | 3  | P09656,Q4G075,Q9Z0J6                                                                                            |
| 1030 | 1,2,3,6,19, 4,5,7,8,17,<br>22,23,24 18,20,21 | 13 | P00507,P01946,P02783,P06760,P13676,P20646,P22273,Q4G075,Q6P6R2,Q811M5,Q9QX74,Q9WTT6,Q9Z0J6                      |
| 1031 | 1,2,3,6,20, 4,5,7,8,17,<br>21,22,23 18,19,24 | 5  | P01835,P02783,P09656,Q99MH3,Q9QX74                                                                              |
| 1032 | 1,2,3,6,20, 4,5,7,8,17,<br>21,22,24 18,19,23 | 3  | P01835,P20646,Q9QX74                                                                                            |
| 1033 | 1,2,3,6,20, 4,5,7,8,17,<br>21,23,24 18,19,22 | 4  | P01835,P09656,P20646,Q9QX74                                                                                     |
| 1034 | 1,2,3,6,20, 4,5,7,8,17,<br>22,23,24 18,19,21 | 11 | P02783,P06760,P07150,P09656,P20646,P22006,Q5QE79,Q6P6R2,Q99MH3,Q9QX74,Q9WTT6                                    |
| 1035 | 1,2,3,6,21, 4,5,7,8,17,<br>22,23,24 18,19,20 | 16 | P01835,P01946,P02783,P06760,P07150,P09656,P13676,P20646,P22282,P30919,P36374,Q4G075,Q62714,Q99MH3,Q9QX74,Q9WTT6 |
| 1036 | 1,2,3,7,8,1 4,5,6,20,2<br>7,18,19 1,22,23,24 | 4  | P20766,P22006,Q66H69,Q811M5                                                                                     |
| 1037 | 1,2,3,7,8,1 4,5,6,19,2<br>7,18,20 1,22,23,24 | 7  | D4A5U3,P06911,P13676,P20766,P25809,Q5GRG2,Q811M5                                                                |
| 1038 | 1,2,3,7,8,1 4,5,6,19,2<br>7,18,21 0,22,23,24 | 5  | iRT-Kit_WR_fusion,P20766,P22006,Q00715,Q811M5                                                                   |
| 1039 | 1,2,3,7,8,1 4,5,6,19,2<br>7,18,22 0,21,23,24 | 1  | P35280                                                                                                          |
| 1040 | 1,2,3,7,8,1 4,5,6,19,2<br>7,18,23 0,21,22,24 | 5  | O70594,P20766,P22006,Q63598,Q64093                                                                              |
| 1041 | 1,2,3,7,8,1 4,5,6,19,2<br>7,18,24 0,21,22,23 | 4  | P20766,Q63598,Q64093,Q811M5                                                                                     |
| 1042 | 1,2,3,7,8,1 4,5,6,18,2<br>7,19,20 1,22,23,24 | 6  | D4A5U3,iRT-Kit_WR_fusion,P13676,Q66H69,Q811M5,Q9WTT6                                                            |
| 1043 | 1,2,3,7,8,1 4,5,6,18,2<br>7,19,21 0,22,23,24 | 10 | iRT-Kit_WR_fusion,P04355,P11883,P22006,P62804,Q00715,Q66H69,Q811M5,Q9QX74,Q9WVK7                                |

|      |                        |                          |                                                                             |
|------|------------------------|--------------------------|-----------------------------------------------------------------------------|
| 1044 | 1,2,3,7,8,1<br>7,19,22 | 4,5,6,18,2<br>0,21,23,24 | 3 iRT-Kit_WR_fusion,P35280,Q66H69                                           |
| 1045 | 1,2,3,7,8,1<br>7,19,23 | 4,5,6,18,2<br>0,21,22,24 | 4 iRT-Kit_WR_fusion,P21674,P22006,Q66H69                                    |
| 1046 | 1,2,3,7,8,1<br>7,19,24 | 4,5,6,18,2<br>0,21,22,23 | 3 iRT-Kit_WR_fusion,P54921,Q66H69                                           |
| 1047 | 1,2,3,7,8,1<br>7,20,21 | 4,5,6,18,1<br>9,22,23,24 | 9 D4A5U3,iRT-Kit_WR_fusion,P13676,P25809,P62804,P63029,Q00715,Q811M5,Q9WTT6 |
| 1048 | 1,2,3,7,8,1<br>7,20,22 | 4,5,6,18,1<br>9,21,23,24 | 3 iRT-Kit_WR_fusion,O89117,P35280                                           |
| 1049 | 1,2,3,7,8,1<br>7,20,23 | 4,5,6,18,1<br>9,21,22,24 | 2 iRT-Kit_WR_fusion,P36376                                                  |
| 1050 | 1,2,3,7,8,1<br>7,20,24 | 4,5,6,18,1<br>9,21,22,23 | 2 P13676,Q811M5                                                             |
| 1051 | 1,2,3,7,8,1<br>7,21,22 | 4,5,6,18,1<br>9,20,23,24 | 3 iRT-Kit_WR_fusion,P11883,P35280                                           |
| 1052 | 1,2,3,7,8,1<br>7,21,23 | 4,5,6,18,1<br>9,20,22,24 | 3 iRT-Kit_WR_fusion,P22006,Q63598                                           |
| 1053 | 1,2,3,7,8,1<br>7,21,24 | 4,5,6,18,1<br>9,20,22,23 | 5 iRT-Kit_WR_fusion,P04762,Q63598,Q6AY61,Q811M5                             |
| 1054 | 1,2,3,7,8,1<br>7,22,23 | 4,5,6,18,1<br>9,20,21,24 | 2 P35280,Q99MH3                                                             |
| 1055 | 1,2,3,7,8,1<br>7,22,24 | 4,5,6,18,1<br>9,20,21,23 | 1 P35280                                                                    |
| 1056 | 1,2,3,7,8,1<br>7,23,24 | 4,5,6,18,1<br>9,20,21,22 | 4 P46720,Q5PQL7,Q63598,Q64093                                               |
| 1057 | 1,2,3,7,8,1<br>8,19,20 | 4,5,6,17,2<br>1,22,23,24 | 4 iRT-Kit_WR_fusion,P20766,P47967,Q66H69                                    |
| 1058 | 1,2,3,7,8,1<br>8,19,21 | 4,5,6,17,2<br>0,22,23,24 | 7 iRT-Kit_WR_fusion,P11883,P20766,P22006,P62804,Q00715,Q66H69               |
| 1059 | 1,2,3,7,8,1<br>8,19,22 | 4,5,6,17,2<br>0,21,23,24 | 3 iRT-Kit_WR_fusion,P20766,P35280                                           |
| 1060 | 1,2,3,7,8,1<br>8,19,23 | 4,5,6,17,2<br>0,21,22,24 | 4 iRT-Kit_WR_fusion,P20766,Q66H69,Q9Z0J6                                    |
| 1061 | 1,2,3,7,8,1<br>8,19,24 | 4,5,6,17,2<br>0,21,22,23 | 2 P20766,Q66H69                                                             |
| 1062 | 1,2,3,7,8,1<br>8,20,21 | 4,5,6,17,1<br>9,22,23,24 | 8 iRT-Kit_WR_fusion,P25809,P47967,P62804,Q00715,Q5RKI1,Q811M5,Q91ZS3        |
| 1063 | 1,2,3,7,8,1<br>8,20,22 | 4,5,6,17,1<br>9,21,23,24 | 1 P35280                                                                    |



|      |                        |                          |    |                                                                                                    |
|------|------------------------|--------------------------|----|----------------------------------------------------------------------------------------------------|
| 1064 | 1,2,3,7,8,1<br>8,20,23 | 4,5,6,17,1<br>9,21,22,24 | 2  | P20766,Q99MH3                                                                                      |
| 1065 | 1,2,3,7,8,1<br>8,20,24 | 4,5,6,17,1<br>9,21,22,23 | 2  | P20766,Q811M5                                                                                      |
| 1066 | 1,2,3,7,8,1<br>8,21,22 | 4,5,6,17,1<br>9,20,23,24 | 3  | iRT-Kit_WR_fusion,P11883,P35280                                                                    |
| 1067 | 1,2,3,7,8,1<br>8,21,23 | 4,5,6,17,1<br>9,20,22,24 | 4  | iRT-Kit_WR_fusion,P20766,P22006,Q9Z0J6                                                             |
| 1068 | 1,2,3,7,8,1<br>8,21,24 | 4,5,6,17,1<br>9,20,22,23 | 4  | iRT-Kit_WR_fusion,P02625,P20766,Q811M5                                                             |
| 1069 | 1,2,3,7,8,1<br>8,22,23 | 4,5,6,17,1<br>9,20,21,24 | 4  | P20766,P35280,P36374,Q99MH3                                                                        |
| 1070 | 1,2,3,7,8,1<br>8,22,24 | 4,5,6,17,1<br>9,20,21,23 | 2  | P20766,P35280                                                                                      |
| 1071 | 1,2,3,7,8,1<br>8,23,24 | 4,5,6,17,1<br>9,20,21,22 | 5  | P20766,Q3ZAV1,Q63598,Q64093,Q9Z0J6                                                                 |
| 1072 | 1,2,3,7,8,1<br>9,20,21 | 4,5,6,17,1<br>8,22,23,24 | 12 | D4A5U3,iRT-<br>Kit_WR_fusion,P11883,P47967,P62804,Q00715,Q5I0D1,Q5RKI1,Q66H69,Q811M5,Q812E4,Q9WTT6 |
| 1073 | 1,2,3,7,8,1<br>9,20,22 | 4,5,6,17,1<br>8,21,23,24 | 2  | iRT-Kit_WR_fusion,P35280                                                                           |
| 1074 | 1,2,3,7,8,1<br>9,20,23 | 4,5,6,17,1<br>8,21,22,24 | 1  | iRT-Kit_WR_fusion                                                                                  |
| 1075 | 1,2,3,7,8,1<br>9,20,24 | 4,5,6,17,1<br>8,21,22,23 | 4  | iRT-Kit_WR_fusion,P08723,Q66H69,Q812E4                                                             |
| 1076 | 1,2,3,7,8,1<br>9,21,22 | 4,5,6,17,1<br>8,20,23,24 | 4  | iRT-Kit_WR_fusion,P11883,P35280,Q66H69                                                             |
| 1077 | 1,2,3,7,8,1<br>9,21,23 | 4,5,6,17,1<br>8,20,22,24 | 5  | iRT-Kit_WR_fusion,P11883,P22006,Q66H69,Q9Z0J6                                                      |
| 1078 | 1,2,3,7,8,1<br>9,21,24 | 4,5,6,17,1<br>8,20,22,23 | 4  | iRT-Kit_WR_fusion,P04355,P11883,Q66H69                                                             |
| 1079 | 1,2,3,7,8,1<br>9,22,23 | 4,5,6,17,1<br>8,20,21,24 | 3  | iRT-Kit_WR_fusion,P35280,Q9Z0J6                                                                    |
| 1080 | 1,2,3,7,8,1<br>9,22,24 | 4,5,6,17,1<br>8,20,21,23 | 2  | iRT-Kit_WR_fusion,P35280                                                                           |
| 1081 | 1,2,3,7,8,1<br>9,23,24 | 4,5,6,17,1<br>8,20,21,22 | 2  | iRT-Kit_WR_fusion,Q9Z0J6                                                                           |
| 1082 | 1,2,3,7,8,2<br>0,21,22 | 4,5,6,17,1<br>8,19,23,24 | 3  | iRT-Kit_WR_fusion,P11883,P35280                                                                    |
| 1083 | 1,2,3,7,8,2<br>0,21,23 | 4,5,6,17,1<br>8,19,22,24 | 2  | iRT-Kit_WR_fusion,Q5RKI1                                                                           |

|      |                         |                          |                                          |
|------|-------------------------|--------------------------|------------------------------------------|
| 1084 | 1,2,3,7,8,2<br>0,21,24  | 4,5,6,17,1<br>8,19,22,23 | 4 iRT-Kit_WR_fusion,Q811M5,Q812E4,Q9JHB9 |
| 1085 | 1,2,3,7,8,2<br>0,22,23  | 4,5,6,17,1<br>8,19,21,24 | 3 iRT-Kit_WR_fusion,P35280,Q99MH3        |
| 1086 | 1,2,3,7,8,2<br>0,22,24  | 4,5,6,17,1<br>8,19,21,23 | 2 iRT-Kit_WR_fusion,P35280               |
| 1087 | 1,2,3,7,8,2<br>0,23,24  | 4,5,6,17,1<br>8,19,21,22 | 1 iRT-Kit_WR_fusion                      |
| 1088 | 1,2,3,7,8,2<br>1,22,23  | 4,5,6,17,1<br>8,19,20,24 | 4 iRT-Kit_WR_fusion,P11883,P35280,Q62714 |
| 1089 | 1,2,3,7,8,2<br>1,22,24  | 4,5,6,17,1<br>8,19,20,23 | 4 iRT-Kit_WR_fusion,P11883,P35280,Q62714 |
| 1090 | 1,2,3,7,8,2<br>1,23,24  | 4,5,6,17,1<br>8,19,20,22 | 3 iRT-Kit_WR_fusion,Q62714,Q9Z0J6        |
| 1091 | 1,2,3,7,8,2<br>2,23,24  | 4,5,6,17,1<br>8,19,20,21 | 3 P35280,Q62714,Q6P6R2                   |
| 1092 | 1,2,3,7,17,<br>18,19,20 | 4,5,6,8,21,<br>22,23,24  | 3 P20766,P30919,Q811M5                   |
| 1093 | 1,2,3,7,17,<br>18,19,21 | 4,5,6,8,20,<br>22,23,24  | 2 P20766,P22006                          |
| 1094 | 1,2,3,7,17,<br>18,19,22 | 4,5,6,8,20,<br>21,23,24  | 0                                        |
| 1095 | 1,2,3,7,17,<br>18,19,23 | 4,5,6,8,20,<br>21,22,24  | 2 P20766,Q10743                          |
| 1096 | 1,2,3,7,17,<br>18,19,24 | 4,5,6,8,20,<br>21,22,23  | 2 P20766,P54921                          |
| 1097 | 1,2,3,7,17,<br>18,20,21 | 4,5,6,8,19,<br>22,23,24  | 2 P00507,Q811M5                          |
| 1098 | 1,2,3,7,17,<br>18,20,22 | 4,5,6,8,19,<br>21,23,24  | 0                                        |
| 1099 | 1,2,3,7,17,<br>18,20,23 | 4,5,6,8,19,<br>21,22,24  | 1 P30919                                 |
| 1100 | 1,2,3,7,17,<br>18,20,24 | 4,5,6,8,19,<br>21,22,23  | 1 Q811M5                                 |
| 1101 | 1,2,3,7,17,<br>18,21,22 | 4,5,6,8,19,<br>20,23,24  | 1 P23739                                 |
| 1102 | 1,2,3,7,17,<br>18,21,23 | 4,5,6,8,19,<br>20,22,24  | 1 P22006                                 |
| 1103 | 1,2,3,7,17,<br>18,21,24 | 4,5,6,8,19,<br>20,22,23  | 3 P19218,Q6AY61,Q811M5                   |

|      |                                              |                        |
|------|----------------------------------------------|------------------------|
| 1104 | 1,2,3,7,17, 4,5,6,8,19,<br>18,22,23 20,21,24 | 3 P22273,P22282,P36374 |
| 1105 | 1,2,3,7,17, 4,5,6,8,19,<br>18,22,24 20,21,23 | 1 P22273               |
| 1106 | 1,2,3,7,17, 4,5,6,8,19,<br>18,23,24 20,21,22 | 3 P19218,P20766,P22273 |
| 1107 | 1,2,3,7,17, 4,5,6,8,18,<br>19,20,21 22,23,24 | 3 Q6AY61,Q811M5,Q9WVK7 |
| 1108 | 1,2,3,7,17, 4,5,6,8,18,<br>19,20,22 21,23,24 | 1 O89117               |
| 1109 | 1,2,3,7,17, 4,5,6,8,18,<br>19,20,23 21,22,24 | 0                      |
| 1110 | 1,2,3,7,17, 4,5,6,8,18,<br>19,20,24 21,22,23 | 2 P54921,Q6AY61        |
| 1111 | 1,2,3,7,17, 4,5,6,8,18,<br>19,21,22 20,23,24 | 1 Q9R168               |
| 1112 | 1,2,3,7,17, 4,5,6,8,18,<br>19,21,23 20,22,24 | 1 P22006               |
| 1113 | 1,2,3,7,17, 4,5,6,8,18,<br>19,21,24 20,22,23 | 3 P54921,Q6AY61,Q9R168 |
| 1114 | 1,2,3,7,17, 4,5,6,8,18,<br>19,22,23 20,21,24 | 2 P22273,Q9R168        |
| 1115 | 1,2,3,7,17, 4,5,6,8,18,<br>19,22,24 20,21,23 | 3 P22273,P54921,Q9R168 |
| 1116 | 1,2,3,7,17, 4,5,6,8,18,<br>19,23,24 20,21,22 | 2 P22273,P54921        |
| 1117 | 1,2,3,7,17, 4,5,6,8,18,<br>20,21,22 19,23,24 | 1 P63029               |
| 1118 | 1,2,3,7,17, 4,5,6,8,18,<br>20,21,23 19,22,24 | 1 P63029               |
| 1119 | 1,2,3,7,17, 4,5,6,8,18,<br>20,21,24 19,22,23 | 2 Q6AY61,Q811M5        |
| 1120 | 1,2,3,7,17, 4,5,6,8,18,<br>20,22,23 19,21,24 | 0                      |
| 1121 | 1,2,3,7,17, 4,5,6,8,18,<br>20,22,24 19,21,23 | 0                      |
| 1122 | 1,2,3,7,17, 4,5,6,8,18,<br>20,23,24 19,21,22 | 0                      |
| 1123 | 1,2,3,7,17, 4,5,6,8,18,<br>21,22,23 19,20,24 | 1 Q9R168               |

|      |                                              |                        |
|------|----------------------------------------------|------------------------|
| 1124 | 1,2,3,7,17, 4,5,6,8,18,<br>21,22,24 19,20,23 | 1 Q9R168               |
| 1125 | 1,2,3,7,17, 4,5,6,8,18,<br>21,23,24 19,20,22 | 2 Q6AY61,Q9R168        |
| 1126 | 1,2,3,7,17, 4,5,6,8,18,<br>22,23,24 19,20,21 | 3 P22273,P22282,Q9R168 |
| 1127 | 1,2,3,7,18, 4,5,6,8,17,<br>19,20,21 22,23,24 | 2 P20760,P47967        |
| 1128 | 1,2,3,7,18, 4,5,6,8,17,<br>19,20,22 21,23,24 | 0                      |
| 1129 | 1,2,3,7,18, 4,5,6,8,17,<br>19,20,23 21,22,24 | 1 P20766               |
| 1130 | 1,2,3,7,18, 4,5,6,8,17,<br>19,20,24 21,22,23 | 1 P20766               |
| 1131 | 1,2,3,7,18, 4,5,6,8,17,<br>19,21,22 20,23,24 | 1 P23739               |
| 1132 | 1,2,3,7,18, 4,5,6,8,17,<br>19,21,23 20,22,24 | 2 P20766,Q9Z0J6        |
| 1133 | 1,2,3,7,18, 4,5,6,8,17,<br>19,21,24 20,22,23 | 1 P20766               |
| 1134 | 1,2,3,7,18, 4,5,6,8,17,<br>19,22,23 20,21,24 | 2 P20766,P22273        |
| 1135 | 1,2,3,7,18, 4,5,6,8,17,<br>19,22,24 20,21,23 | 1 P20766               |
| 1136 | 1,2,3,7,18, 4,5,6,8,17,<br>19,23,24 20,21,22 | 3 P20766,Q6AYQ8,Q9Z0J6 |
| 1137 | 1,2,3,7,18, 4,5,6,8,17,<br>20,21,22 19,23,24 | 1 P01835               |
| 1138 | 1,2,3,7,18, 4,5,6,8,17,<br>20,21,23 19,22,24 | 1 P01835               |
| 1139 | 1,2,3,7,18, 4,5,6,8,17,<br>20,21,24 19,22,23 | 2 P01835,Q811M5        |
| 1140 | 1,2,3,7,18, 4,5,6,8,17,<br>20,22,23 19,21,24 | 1 Q99MH3               |
| 1141 | 1,2,3,7,18, 4,5,6,8,17,<br>20,22,24 19,21,23 | 0                      |
| 1142 | 1,2,3,7,18, 4,5,6,8,17,<br>20,23,24 19,21,22 | 1 P20766               |
| 1143 | 1,2,3,7,18, 4,5,6,8,17,<br>21,22,23 19,20,24 | 3 P01835,P36374,Q6RUV5 |

|      |                                              |                                                           |
|------|----------------------------------------------|-----------------------------------------------------------|
| 1144 | 1,2,3,7,18, 4,5,6,8,17,<br>21,22,24 19,20,23 | 2 P01835,P23739                                           |
| 1145 | 1,2,3,7,18, 4,5,6,8,17,<br>21,23,24 19,20,22 | 2 P01835,P20766                                           |
| 1146 | 1,2,3,7,18, 4,5,6,8,17,<br>22,23,24 19,20,21 | 8 P06760,P22273,P22282,P36374,Q64268,Q6AYQ8,Q6P6R2,Q9QX74 |
| 1147 | 1,2,3,7,19, 4,5,6,8,17,<br>20,21,22 18,23,24 | 1 P47967                                                  |
| 1148 | 1,2,3,7,19, 4,5,6,8,17,<br>20,21,23 18,22,24 | 0                                                         |
| 1149 | 1,2,3,7,19, 4,5,6,8,17,<br>20,21,24 18,22,23 | 1 Q6AY61                                                  |
| 1150 | 1,2,3,7,19, 4,5,6,8,17,<br>20,22,23 18,21,24 | 0                                                         |
| 1151 | 1,2,3,7,19, 4,5,6,8,17,<br>20,22,24 18,21,23 | 0                                                         |
| 1152 | 1,2,3,7,19, 4,5,6,8,17,<br>20,23,24 18,21,22 | 0                                                         |
| 1153 | 1,2,3,7,19, 4,5,6,8,17,<br>21,22,23 18,20,24 | 1 Q9Z0J6                                                  |
| 1154 | 1,2,3,7,19, 4,5,6,8,17,<br>21,22,24 18,20,23 | 1 Q9R168                                                  |
| 1155 | 1,2,3,7,19, 4,5,6,8,17,<br>21,23,24 18,20,22 | 1 Q9Z0J6                                                  |
| 1156 | 1,2,3,7,19, 4,5,6,8,17,<br>22,23,24 18,20,21 | 4 P06760,P22273,Q6AYQ8,Q9Z0J6                             |
| 1157 | 1,2,3,7,20, 4,5,6,8,17,<br>21,22,23 18,19,24 | 1 P01835                                                  |
| 1158 | 1,2,3,7,20, 4,5,6,8,17,<br>21,22,24 18,19,23 | 1 P01835                                                  |
| 1159 | 1,2,3,7,20, 4,5,6,8,17,<br>21,23,24 18,19,22 | 2 P01835,P08649                                           |
| 1160 | 1,2,3,7,20, 4,5,6,8,17,<br>22,23,24 18,19,21 | 1 Q9QX74                                                  |
| 1161 | 1,2,3,7,21, 4,5,6,8,17,<br>22,23,24 18,19,20 | 3 P01835,Q62714,Q9R168                                    |
| 1162 | 1,2,3,8,17, 4,5,6,7,21,<br>18,19,20 22,23,24 | 2 P25809,Q811M5                                           |
| 1163 | 1,2,3,8,17, 4,5,6,7,20,<br>18,19,21 22,23,24 | 3 P22006,Q66H69,Q9WVK7                                    |

|      |                                              |                                                                  |
|------|----------------------------------------------|------------------------------------------------------------------|
| 1164 | 1,2,3,8,17, 4,5,6,7,20,<br>18,19,22 21,23,24 | 1 P97580                                                         |
| 1165 | 1,2,3,8,17, 4,5,6,7,20,<br>18,19,23 21,22,24 | 2 P22006,Q9Z0J6                                                  |
| 1166 | 1,2,3,8,17, 4,5,6,7,20,<br>18,19,24 21,22,23 | 0                                                                |
| 1167 | 1,2,3,8,17, 4,5,6,7,19,<br>18,20,21 22,23,24 | 3 P25809,P63029,Q811M5                                           |
| 1168 | 1,2,3,8,17, 4,5,6,7,19,<br>18,20,22 21,23,24 | 0                                                                |
| 1169 | 1,2,3,8,17, 4,5,6,7,19,<br>18,20,23 21,22,24 | 4 P00714,P36376,P63029,Q99MH3                                    |
| 1170 | 1,2,3,8,17, 4,5,6,7,19,<br>18,20,24 21,22,23 | 1 Q811M5                                                         |
| 1171 | 1,2,3,8,17, 4,5,6,7,19,<br>18,21,22 20,23,24 | 0                                                                |
| 1172 | 1,2,3,8,17, 4,5,6,7,19,<br>18,21,23 20,22,24 | 1 P22006                                                         |
| 1173 | 1,2,3,8,17, 4,5,6,7,19,<br>18,21,24 20,22,23 | 1 Q811M5                                                         |
| 1174 | 1,2,3,8,17, 4,5,6,7,19,<br>18,22,23 20,21,24 | 7 P00714,P11598,P22283,P36374,Q63617,Q99MH3,Q9R0T3               |
| 1175 | 1,2,3,8,17, 4,5,6,7,19,<br>18,22,24 20,21,23 | 2 P11598,Q63617                                                  |
| 1176 | 1,2,3,8,17, 4,5,6,7,19,<br>18,23,24 20,21,22 | 2 Q63617,Q99041                                                  |
| 1177 | 1,2,3,8,17, 4,5,6,7,18,<br>19,20,21 22,23,24 | 9 D4A5U3,P13676,P25809,P63029,P97675,Q66H69,Q6P6R2,Q811M5,Q9WVK7 |
| 1178 | 1,2,3,8,17, 4,5,6,7,18,<br>19,20,22 21,23,24 | 1 O89117                                                         |
| 1179 | 1,2,3,8,17, 4,5,6,7,18,<br>19,20,23 21,22,24 | 3 O89117,P36376,P63029                                           |
| 1180 | 1,2,3,8,17, 4,5,6,7,18,<br>19,20,24 21,22,23 | 2 O89117,Q68G31                                                  |
| 1181 | 1,2,3,8,17, 4,5,6,7,18,<br>19,21,22 20,23,24 | 2 P02091,Q9WVK7                                                  |
| 1182 | 1,2,3,8,17, 4,5,6,7,18,<br>19,21,23 20,22,24 | 2 P22006,Q9Z0J6                                                  |
| 1183 | 1,2,3,8,17, 4,5,6,7,18,<br>19,21,24 20,22,23 | 2 Q66H69,Q9WVK7                                                  |

|      |                                              |                                                           |
|------|----------------------------------------------|-----------------------------------------------------------|
| 1184 | 1,2,3,8,17, 4,5,6,7,18,<br>19,22,23 20,21,24 | 4 O89117,P02091,P11598,Q9Z0J6                             |
| 1185 | 1,2,3,8,17, 4,5,6,7,18,<br>19,22,24 20,21,23 | 1 O89117                                                  |
| 1186 | 1,2,3,8,17, 4,5,6,7,18,<br>19,23,24 20,21,22 | 1 Q9Z0J6                                                  |
| 1187 | 1,2,3,8,17, 4,5,6,7,18,<br>20,21,22 19,23,24 | 2 P25809,P63029                                           |
| 1188 | 1,2,3,8,17, 4,5,6,7,18,<br>20,21,23 19,22,24 | 2 P36376,P63029                                           |
| 1189 | 1,2,3,8,17, 4,5,6,7,18,<br>20,21,24 19,22,23 | 2 P63029,Q811M5                                           |
| 1190 | 1,2,3,8,17, 4,5,6,7,18,<br>20,22,23 19,21,24 | 5 O89117,P00714,P36376,P63029,Q99MH3                      |
| 1191 | 1,2,3,8,17, 4,5,6,7,18,<br>20,22,24 19,21,23 | 1 O89117                                                  |
| 1192 | 1,2,3,8,17, 4,5,6,7,18,<br>20,23,24 19,21,22 | 2 P36376,P63029                                           |
| 1193 | 1,2,3,8,17, 4,5,6,7,18,<br>21,22,23 19,20,24 | 0                                                         |
| 1194 | 1,2,3,8,17, 4,5,6,7,18,<br>21,22,24 19,20,23 | 0                                                         |
| 1195 | 1,2,3,8,17, 4,5,6,7,18,<br>21,23,24 19,20,22 | 1 Q9Z0J6                                                  |
| 1196 | 1,2,3,8,17, 4,5,6,7,18,<br>22,23,24 19,20,21 | 8 P00714,P11598,P22283,P47967,P97840,Q5I0D1,Q63617,Q9R0T3 |
| 1197 | 1,2,3,8,18, 4,5,6,7,17,<br>19,20,21 22,23,24 | 2 P25809,Q68G31                                           |
| 1198 | 1,2,3,8,18, 4,5,6,7,17,<br>19,20,22 21,23,24 | 1 P36860                                                  |
| 1199 | 1,2,3,8,18, 4,5,6,7,17,<br>19,20,23 21,22,24 | 3 P36860,Q9R168,Q9Z0J6                                    |
| 1200 | 1,2,3,8,18, 4,5,6,7,17,<br>19,20,24 21,22,23 | 2 Q68G31,Q9R168                                           |
| 1201 | 1,2,3,8,18, 4,5,6,7,17,<br>19,21,22 20,23,24 | 0                                                         |
| 1202 | 1,2,3,8,18, 4,5,6,7,17,<br>19,21,23 20,22,24 | 2 P22006,Q9Z0J6                                           |
| 1203 | 1,2,3,8,18, 4,5,6,7,17,<br>19,21,24 20,22,23 | 2 Q68G31,Q9Z0J6                                           |

|      |                                              |                                                                          |
|------|----------------------------------------------|--------------------------------------------------------------------------|
| 1204 | 1,2,3,8,18, 4,5,6,7,17,<br>19,22,23 20,21,24 | 2 Q99MH3,Q9Z0J6                                                          |
| 1205 | 1,2,3,8,18, 4,5,6,7,17,<br>19,22,24 20,21,23 | 0                                                                        |
| 1206 | 1,2,3,8,18, 4,5,6,7,17,<br>19,23,24 20,21,22 | 1 Q9Z0J6                                                                 |
| 1207 | 1,2,3,8,18, 4,5,6,7,17,<br>20,21,22 19,23,24 | 1 P25809                                                                 |
| 1208 | 1,2,3,8,18, 4,5,6,7,17,<br>20,21,23 19,22,24 | 0                                                                        |
| 1209 | 1,2,3,8,18, 4,5,6,7,17,<br>20,21,24 19,22,23 | 1 Q811M5                                                                 |
| 1210 | 1,2,3,8,18, 4,5,6,7,17,<br>20,22,23 19,21,24 | 2 P00714,Q99MH3                                                          |
| 1211 | 1,2,3,8,18, 4,5,6,7,17,<br>20,22,24 19,21,23 | 0                                                                        |
| 1212 | 1,2,3,8,18, 4,5,6,7,17,<br>20,23,24 19,21,22 | 2 Q5QE79,Q9R168                                                          |
| 1213 | 1,2,3,8,18, 4,5,6,7,17,<br>21,22,23 19,20,24 | 4 P36374,P54921,Q99MH3,Q9Z0J6                                            |
| 1214 | 1,2,3,8,18, 4,5,6,7,17,<br>21,22,24 19,20,23 | 0                                                                        |
| 1215 | 1,2,3,8,18, 4,5,6,7,17,<br>21,23,24 19,20,22 | 1 Q9Z0J6                                                                 |
| 1216 | 1,2,3,8,18, 4,5,6,7,17,<br>22,23,24 19,20,21 | 10 P00714,P06760,P11598,P22283,P36374,Q63617,Q6P6R2,Q99MH3,Q9R0T3,Q9Z0J6 |
| 1217 | 1,2,3,8,19, 4,5,6,7,17,<br>20,21,22 18,23,24 | 0                                                                        |
| 1218 | 1,2,3,8,19, 4,5,6,7,17,<br>20,21,23 18,22,24 | 1 Q9Z0J6                                                                 |
| 1219 | 1,2,3,8,19, 4,5,6,7,17,<br>20,21,24 18,22,23 | 1 Q68G31                                                                 |
| 1220 | 1,2,3,8,19, 4,5,6,7,17,<br>20,22,23 18,21,24 | 1 P36860                                                                 |
| 1221 | 1,2,3,8,19, 4,5,6,7,17,<br>20,22,24 18,21,23 | 0                                                                        |
| 1222 | 1,2,3,8,19, 4,5,6,7,17,<br>20,23,24 18,21,22 | 1 Q9Z0J6                                                                 |
| 1223 | 1,2,3,8,19, 4,5,6,7,17,<br>21,22,23 18,20,24 | 1 Q9Z0J6                                                                 |



|      |                                              |                                                                                               |
|------|----------------------------------------------|-----------------------------------------------------------------------------------------------|
| 1224 | 1,2,3,8,19, 4,5,6,7,17,<br>21,22,24 18,20,23 | 1 Q9Z0J6                                                                                      |
| 1225 | 1,2,3,8,19, 4,5,6,7,17,<br>21,23,24 18,20,22 | 1 Q9Z0J6                                                                                      |
| 1226 | 1,2,3,8,19, 4,5,6,7,17,<br>22,23,24 18,20,21 | 3 P00507,P11598,Q9Z0J6                                                                        |
| 1227 | 1,2,3,8,20, 4,5,6,7,17,<br>21,22,23 18,19,24 | 1 Q99MH3                                                                                      |
| 1228 | 1,2,3,8,20, 4,5,6,7,17,<br>21,22,24 18,19,23 | 0                                                                                             |
| 1229 | 1,2,3,8,20, 4,5,6,7,17,<br>21,23,24 18,19,22 | 0                                                                                             |
| 1230 | 1,2,3,8,20, 4,5,6,7,17,<br>22,23,24 18,19,21 | 1 Q5QE79                                                                                      |
| 1231 | 1,2,3,8,21, 4,5,6,7,17,<br>22,23,24 18,19,20 | 2 P30919,Q9Z0J6                                                                               |
| 1232 | 1,2,3,17,1 4,5,6,7,8,2<br>8,19,20,21 2,23,24 | 4 O54858,P20760,Q99041,Q9WVK7                                                                 |
| 1233 | 1,2,3,17,1 4,5,6,7,8,2<br>8,19,20,22 1,23,24 | 3 P00714,P36860,Q63474                                                                        |
| 1234 | 1,2,3,17,1 4,5,6,7,8,2<br>8,19,20,23 1,22,24 | 2 P00714,Q99041                                                                               |
| 1235 | 1,2,3,17,1 4,5,6,7,8,2<br>8,19,20,24 1,22,23 | 2 O54858,Q99041                                                                               |
| 1236 | 1,2,3,17,1 4,5,6,7,8,2<br>8,19,21,22 0,23,24 | 3 P22273,P23739,Q4G075                                                                        |
| 1237 | 1,2,3,17,1 4,5,6,7,8,2<br>8,19,21,23 0,22,24 | 6 P02780,P22006,P22273,Q4G075,Q99041,Q9Z0J6                                                   |
| 1238 | 1,2,3,17,1 4,5,6,7,8,2<br>8,19,21,24 0,22,23 | 3 P22273,Q4G075,Q99041                                                                        |
| 1239 | 1,2,3,17,1 4,5,6,7,8,2<br>8,19,22,23 0,21,24 | 13 P00714,P02780,P06760,P06761,P11598,P22273,P22282,P22283,Q4G075,Q5M8C6,Q63617,Q99041,Q9R0T3 |
| 1240 | 1,2,3,17,1 4,5,6,7,8,2<br>8,19,22,24 0,21,23 | 9 P02780,P06760,P06761,P11598,P22273,P22282,Q4G075,Q63617,Q99041                              |
| 1241 | 1,2,3,17,1 4,5,6,7,8,2<br>8,19,23,24 0,21,22 | 11 P00714,P02780,P06760,P06761,P11598,P22273,P22282,Q4G075,Q63617,Q99041,Q9Z0J6               |
| 1242 | 1,2,3,17,1 4,5,6,7,8,1<br>8,20,21,22 9,23,24 | 1 P63029                                                                                      |
| 1243 | 1,2,3,17,1 4,5,6,7,8,1<br>8,20,21,23 9,22,24 | 4 P00714,P22282,P63029,Q99041                                                                 |

|      |                                              |                                                                                                                                                           |
|------|----------------------------------------------|-----------------------------------------------------------------------------------------------------------------------------------------------------------|
| 1244 | 1,2,3,17,1 4,5,6,7,8,1<br>8,20,21,24 9,22,23 | 5 O54858,P19218,P50115,Q811M5,Q99041                                                                                                                      |
| 1245 | 1,2,3,17,1 4,5,6,7,8,1<br>8,20,22,23 9,21,24 | 7 P00714,P06760,P06761,P22273,P22282,Q99041,Q99MH3                                                                                                        |
| 1246 | 1,2,3,17,1 4,5,6,7,8,1<br>8,20,22,24 9,21,23 | 6 P00714,P06760,P22273,P22282,P50115,Q99041                                                                                                               |
| 1247 | 1,2,3,17,1 4,5,6,7,8,1<br>8,20,23,24 9,21,22 | 6 P00714,P06760,P19218,P22273,P22282,Q99041                                                                                                               |
| 1248 | 1,2,3,17,1 4,5,6,7,8,1<br>8,21,22,23 9,20,24 | 15 P00714,P02780,P06761,P11598,P22273,P22282,P36374,P46462,P82471,Q4G075,Q5M8C6,Q636<br>17,Q6RUV5,Q99041,Q9R0T3                                           |
| 1249 | 1,2,3,17,1 4,5,6,7,8,1<br>8,21,22,24 9,20,23 | 8 P02780,P06761,P11598,P22273,P22282,Q4G075,Q63617,Q99041                                                                                                 |
| 1250 | 1,2,3,17,1 4,5,6,7,8,1<br>8,21,23,24 9,20,22 | 8 P02780,P06761,P19218,P22273,P22282,Q4G075,Q63617,Q99041                                                                                                 |
| 1251 | 1,2,3,17,1 4,5,6,7,8,1<br>8,22,23,24 9,20,21 | 21 D3ZUC6,P00714,P02780,P04905,P06760,P06761,P0C0A9,P11598,P22273,P22282,P22283,P3637<br>4,P46462,P55159,Q4G075,Q5I0D1,Q5M8C6,Q63617,Q99041,Q9R0T3,Q9WTT6 |
| 1252 | 1,2,3,17,1 4,5,6,7,8,1<br>9,20,21,22 8,23,24 | 4 O89117,P49134,P63029,Q9WVK7                                                                                                                             |
| 1253 | 1,2,3,17,1 4,5,6,7,8,1<br>9,20,21,23 8,22,24 | 4 O54858,P49134,P63029,Q99041                                                                                                                             |
| 1254 | 1,2,3,17,1 4,5,6,7,8,1<br>9,20,21,24 8,22,23 | 6 O54858,P49134,P54921,Q6AY61,Q99041,Q9WVK7                                                                                                               |
| 1255 | 1,2,3,17,1 4,5,6,7,8,1<br>9,20,22,23 8,21,24 | 4 O89117,P00714,P22273,P36860                                                                                                                             |
| 1256 | 1,2,3,17,1 4,5,6,7,8,1<br>9,20,22,24 8,21,23 | 2 O89117,P22273                                                                                                                                           |
| 1257 | 1,2,3,17,1 4,5,6,7,8,1<br>9,20,23,24 8,21,22 | 2 P22273,Q99041                                                                                                                                           |
| 1258 | 1,2,3,17,1 4,5,6,7,8,1<br>9,21,22,23 8,20,24 | 7 P02091,P02780,P06761,P11598,P22273,P22282,Q4G075                                                                                                        |
| 1259 | 1,2,3,17,1 4,5,6,7,8,1<br>9,21,22,24 8,20,23 | 5 P02091,P02780,P22273,Q4G075,Q9R168                                                                                                                      |
| 1260 | 1,2,3,17,1 4,5,6,7,8,1<br>9,21,23,24 8,20,22 | 6 P02780,P12020,P22273,Q4G075,Q99041,Q9Z0J6                                                                                                               |
| 1261 | 1,2,3,17,1 4,5,6,7,8,1<br>9,22,23,24 8,20,21 | 14 P00714,P02091,P02780,P06760,P06761,P11598,P22273,P22282,P22283,Q4G075,Q5M8C6,Q636<br>17,Q99041,Q9R0T3                                                  |
| 1262 | 1,2,3,17,2 4,5,6,7,8,1<br>0,21,22,23 8,19,24 | 4 P00714,P22282,P63029,Q99041                                                                                                                             |
| 1263 | 1,2,3,17,2 4,5,6,7,8,1<br>0,21,22,24 8,19,23 | 2 P63029,Q99041                                                                                                                                           |

|      |                                              |    |                                                                                                                                                           |
|------|----------------------------------------------|----|-----------------------------------------------------------------------------------------------------------------------------------------------------------|
| 1264 | 1,2,3,17,2 4,5,6,7,8,1<br>0,21,23,24 8,19,22 | 3  | P22282,P63029,Q99041                                                                                                                                      |
| 1265 | 1,2,3,17,2 4,5,6,7,8,1<br>0,22,23,24 8,19,21 | 7  | P00714,P06760,P06761,P07150,P22273,P22282,Q99041                                                                                                          |
| 1266 | 1,2,3,17,2 4,5,6,7,8,1<br>1,22,23,24 8,19,20 | 13 | P00714,P02780,P06761,P07150,P11598,P22273,P22282,Q4G075,Q5I0D1,Q63617,Q99041,Q9R0T3,Q9R168                                                                |
| 1267 | 1,2,3,18,1 4,5,6,7,8,1<br>9,20,21,22 7,23,24 | 1  | P20760                                                                                                                                                    |
| 1268 | 1,2,3,18,1 4,5,6,7,8,1<br>9,20,21,23 7,22,24 | 2  | Q99041,Q9Z0J6                                                                                                                                             |
| 1269 | 1,2,3,18,1 4,5,6,7,8,1<br>9,20,21,24 7,22,23 | 5  | O54858,P20760,P50115,Q68G31,Q99041                                                                                                                        |
| 1270 | 1,2,3,18,1 4,5,6,7,8,1<br>9,20,22,23 7,21,24 | 7  | P00714,P06760,P22273,P36860,P50116,Q63474,Q9QX74                                                                                                          |
| 1271 | 1,2,3,18,1 4,5,6,7,8,1<br>9,20,22,24 7,21,23 | 4  | P06760,P50115,P50116,Q9QX74                                                                                                                               |
| 1272 | 1,2,3,18,1 4,5,6,7,8,1<br>9,20,23,24 7,21,22 | 7  | P06760,P22273,P50115,P50116,Q99041,Q9QX74,Q9Z0J6                                                                                                          |
| 1273 | 1,2,3,18,1 4,5,6,7,8,1<br>9,21,22,23 7,20,24 | 6  | P02780,P06911,P22273,P22282,Q4G075,Q9Z0J6                                                                                                                 |
| 1274 | 1,2,3,18,1 4,5,6,7,8,1<br>9,21,22,24 7,20,23 | 4  | P22273,P50115,P50116,Q4G075                                                                                                                               |
| 1275 | 1,2,3,18,1 4,5,6,7,8,1<br>9,21,23,24 7,20,22 | 5  | P02780,P22273,Q4G075,Q99041,Q9Z0J6                                                                                                                        |
| 1276 | 1,2,3,18,1 4,5,6,7,8,1<br>9,22,23,24 7,20,21 | 21 | D4A5U3,P00714,P02780,P06760,P06761,P11598,P13676,P19223,P22273,P22282,P50115,P50116,P97697,Q4G075,Q5M8C6,Q63617,Q99041,Q9QX74,Q9R0T3,Q9WTT6,Q9Z0J6        |
| 1277 | 1,2,3,18,2 4,5,6,7,8,1<br>0,21,22,23 7,19,24 | 3  | P00714,P22282,P50115                                                                                                                                      |
| 1278 | 1,2,3,18,2 4,5,6,7,8,1<br>0,21,22,24 7,19,23 | 1  | P50115                                                                                                                                                    |
| 1279 | 1,2,3,18,2 4,5,6,7,8,1<br>0,21,23,24 7,19,22 | 2  | P50115,Q99041                                                                                                                                             |
| 1280 | 1,2,3,18,2 4,5,6,7,8,1<br>0,22,23,24 7,19,21 | 12 | P00714,P06760,P06761,P07150,P20646,P22273,P22282,P50115,P50116,Q5QE79,Q99041,Q9QX74                                                                       |
| 1281 | 1,2,3,18,2 4,5,6,7,8,1<br>1,22,23,24 7,19,20 | 22 | D4A5U3,P00714,P02780,P06761,P07150,P11598,P13676,P20646,P22273,P22282,P36374,P46462,P50115,P50116,Q4G075,Q63617,Q6RUV5,Q99041,Q9QX74,Q9R0T3,Q9WTT6,Q9Z0J6 |
| 1282 | 1,2,3,19,2 4,5,6,7,8,1<br>0,21,22,23 7,18,24 | 0  |                                                                                                                                                           |
| 1283 | 1,2,3,19,2 4,5,6,7,8,1<br>0,21,22,24 7,18,23 | 2  | O70594,Q64335                                                                                                                                             |

|      |                          |                                |    |                                                                                                                                                                                                                                                                                                                                                                                            |
|------|--------------------------|--------------------------------|----|--------------------------------------------------------------------------------------------------------------------------------------------------------------------------------------------------------------------------------------------------------------------------------------------------------------------------------------------------------------------------------------------|
| 1284 | 1,2,3,19,2<br>0,21,23,24 | 4,5,6,7,8,1<br>7,18,22         | 3  | Q64335,Q99041,Q9Z0J6                                                                                                                                                                                                                                                                                                                                                                       |
| 1285 | 1,2,3,19,2<br>0,22,23,24 | 4,5,6,7,8,1<br>7,18,21         | 4  | P06760,P22273,P50116,Q9QX74                                                                                                                                                                                                                                                                                                                                                                |
| 1286 | 1,2,3,19,2<br>1,22,23,24 | 4,5,6,7,8,1<br>7,18,20         | 13 | P02780,P06761,P06911,P11598,P12020,P22273,P22282,P50116,Q4G075,Q64335,Q9QX74,Q9WTT6,Q9Z0J6                                                                                                                                                                                                                                                                                                 |
| 1287 | 1,2,3,20,2<br>1,22,23,24 | 4,5,6,7,8,1<br>7,18,19         | 5  | P07150,P22282,P50115,Q99041,Q9QX74                                                                                                                                                                                                                                                                                                                                                         |
| 1288 | 1,2,4,5,6,7<br>,8,17     | 3,18,19,20<br>,21,22,23,<br>24 | 25 | B1H234,iRT-<br>Kit_WR_fusion,O54858,O70594,P02454,P13432,P18418,P20760,P23593,P31044,P36860,P50115,P50116,P52590,P80299,P97580,Q05702,Q30KJ2,Q4FZU2,Q5GRG2,Q6IFU8,Q6IMF3,Q6P6Q2,Q99041,Q9QZQ5                                                                                                                                                                                              |
| 1289 | 1,2,4,5,6,7<br>,8,18     | 3,17,19,20<br>,21,22,23,<br>24 | 27 | B1H234,O54858,O70594,P02454,P11598,P16636,P18418,P19629,P20762,P23593,P31044,P36860,P42854,P50115,P50116,P50280,P52590,P80299,P97580,Q03191,Q05702,Q30KJ2,Q4FZU4,Q4KLZ6,Q91ZS3,Q99041,Q9QZQ5                                                                                                                                                                                               |
| 1290 | 1,2,4,5,6,7<br>,8,19     | 3,17,18,20<br>,21,22,23,<br>24 | 29 | B1H234,iRT-<br>Kit_WR_fusion,O54858,O70594,P06761,P11598,P11762,P15399,P18418,P19629,P22282,P31044,P35952,P42854,P50115,P50116,P50280,P52590,P80299,P97580,Q30KJ2,Q4FZU4,Q66H69,Q6IMF3,Q6TMA8,Q91ZS3,Q99041,Q9JI85,Q9QZQ5                                                                                                                                                                  |
| 1291 | 1,2,4,5,6,7<br>,8,20     | 3,17,18,19<br>,21,22,23,<br>24 | 50 | B1H234,D4A5U3,iRT-<br>Kit_WR_fusion,O54858,P02454,P02631,P02780,P06761,P06911,P0DP29,P0DP30,P0DP31,P11598,P11762,P12020,P15399,P17559,P18418,P19629,P22273,P22282,P23593,P25031,P31044,P35952,P42854,P50115,P50116,P50280,P52590,P80299,P97697,Q03191,Q05702,Q30KJ2,Q4AEF8,Q4G075,Q5GRG2,Q5I0D1,Q62946,Q6IFU8,Q6IG05,Q6IMF3,Q6P6Q2,Q78P75,Q91ZS3,Q99041,Q9JHB9,Q9JI85,Q9QZQ5,Q9R0T3,Q9Z0J6 |
| 1292 | 1,2,4,5,6,7<br>,8,21     | 3,17,18,19<br>,20,22,23,<br>24 | 34 | B1H234,iRT-<br>Kit_WR_fusion,O54858,O70594,P02454,P02631,P11598,P16228,P18418,P19629,P22282,P23593,P30919,P35952,P36860,P42854,P50115,P50116,P52590,P70549,P80299,Q00715,Q03191,Q05702,Q30KJ2,Q4FZU2,Q63474,Q6IFU8,Q6IMF3,Q6P6Q2,Q91ZS3,Q99041,Q9JI85,Q9QZQ5                                                                                                                               |
| 1293 | 1,2,4,5,6,7<br>,8,22     | 3,17,18,19<br>,20,21,23,<br>24 | 24 | B1H234,iRT-<br>Kit_WR_fusion,O54858,P15399,P18418,P19218,P19629,P20760,P23593,P27590,P42854,P50115,P50116,P50280,P52590,P80299,P97580,Q03191,Q09030,Q30KJ2,Q4FZU4,Q6P6R2,Q91ZS3,Q99041                                                                                                                                                                                                     |
| 1294 | 1,2,4,5,6,7<br>,8,23     | 3,17,18,19<br>,20,21,22,<br>24 | 27 | B1H234,iRT-<br>Kit_WR_fusion,O54858,O70594,P18418,P19629,P20760,P20761,P20762,P23593,P23785,P36860,P42854,P50115,P50116,P52590,P80299,Q03191,Q05702,Q09030,Q30KJ2,Q4FZU4,Q63532,Q6IMF3,Q91ZS3,Q99041,Q9JJ50                                                                                                                                                                                |
| 1295 | 1,2,4,5,6,7<br>,8,24     | 3,17,18,19<br>,20,21,22,<br>23 | 25 | B1H234,iRT-<br>Kit_WR_fusion,O54858,O70594,P18418,P20760,P23593,P30919,P36860,P50115,P50116,P50280,P52590,Q03191,Q05702,Q30KJ2,Q4FZU2,Q4KLZ6,Q63474,Q6IFU8,Q6IMF3,Q6P6Q2,Q6P6R2,Q91ZS3,Q99041                                                                                                                                                                                              |

|      |                       |                               |    |                                                                                                                     |
|------|-----------------------|-------------------------------|----|---------------------------------------------------------------------------------------------------------------------|
| 1296 | 1,2,4,5,6,7<br>,17,18 | 3,8,19,20,<br>21,22,23,2<br>4 | 13 | B1H234,O70594,P00762,P16636,P18418,P36860,P50116,P52590,P80299,Q03191,Q4KLZ6,Q9W<br>VH8,Q9Z0J6                      |
| 1297 | 1,2,4,5,6,7<br>,17,19 | 3,8,18,20,<br>21,22,23,2<br>4 | 7  | B1H234,P00762,P18418,P50116,P52590,P80299,Q9R168                                                                    |
| 1298 | 1,2,4,5,6,7<br>,17,20 | 3,8,18,19,<br>21,22,23,2<br>4 | 14 | B1H234,P0DP29;P0DP30;P0DP31,P11598,P18418,P19223,P50116,P52590,P55091,P55281,P802<br>99,P97697,Q03191,Q5GRG2,Q9Z0J6 |
| 1299 | 1,2,4,5,6,7<br>,17,21 | 3,8,18,19,<br>20,22,23,2<br>4 | 11 | B1H234,P05539,P19939,P36860,P50116,P52590,P80299,Q03191,Q63474,Q9R168,Q9Z0J6                                        |
| 1300 | 1,2,4,5,6,7<br>,17,22 | 3,8,18,19,<br>20,21,23,2<br>4 | 10 | B1H234,P23593,P36860,P50116,P52590,P80299,Q03191,Q9EQS0,Q9R168,Q9Z0J6                                               |
| 1301 | 1,2,4,5,6,7<br>,17,23 | 3,8,18,19,<br>20,21,22,2<br>4 | 9  | B1H234,O70594,P36860,P50116,P52590,P80299,Q03191,Q9QZ76,Q9R168                                                      |
| 1302 | 1,2,4,5,6,7<br>,17,24 | 3,8,18,19,<br>20,21,22,2<br>3 | 13 | B1H234,P01039,P18418,P19939,P36860,P50116,P52590,P80299,Q03191,Q4KLZ6,Q6AY61,Q9R<br>168,Q9Z0J6                      |
| 1303 | 1,2,4,5,6,7<br>,18,19 | 3,8,17,20,<br>21,22,23,2<br>4 | 8  | B1H234,P00762,P18418,P50116,P52590,P80299,Q03191,Q4KLZ6                                                             |
| 1304 | 1,2,4,5,6,7<br>,18,20 | 3,8,17,19,<br>21,22,23,2<br>4 | 13 | B1H234,P0DP29;P0DP30;P0DP31,P11598,P18418,P50116,P52590,P80299,Q03191,Q4KLZ6,Q5G<br>RG2,Q80WL1,Q91ZS3,Q9Z0J6        |
| 1305 | 1,2,4,5,6,7<br>,18,21 | 3,8,17,19,<br>20,22,23,2<br>4 | 13 | B1H234,O89117,P11598,P18418,P36860,P50116,P52590,P80299,Q00715,Q03191,Q4KLZ6,Q91<br>ZS3,Q9JJ50                      |
| 1306 | 1,2,4,5,6,7<br>,18,22 | 3,8,17,19,<br>20,21,23,2<br>4 | 11 | B1H234,P00762,P16636,P23593,P50116,P52590,P80299,Q03191,Q4KLZ6,Q6P6R2,Q9EQS0                                        |
| 1307 | 1,2,4,5,6,7<br>,18,23 | 3,8,17,19,<br>20,21,22,2<br>4 | 13 | B1H234,O70594,P16636,P36860,P50116,P52590,P80299,Q03191,Q4KLZ6,Q6P6R2,Q9EQS0,Q9J<br>J50,Q9Z2L0                      |
| 1308 | 1,2,4,5,6,7<br>,18,24 | 3,8,17,19,<br>20,21,22,2<br>3 | 9  | B1H234,P18418,P36860,P50116,P52590,P80299,Q03191,Q4KLZ6,Q6P6R2                                                      |

|      |                       |                               |    |                                                                                                                                                                                 |
|------|-----------------------|-------------------------------|----|---------------------------------------------------------------------------------------------------------------------------------------------------------------------------------|
| 1309 | 1,2,4,5,6,7<br>,19,20 | 3,8,17,18,<br>21,22,23,2<br>4 | 14 | B1H234,P02780,P0DP29;P0DP30;P0DP31,P11598,P18418,P42854,P50116,P52590,P80299,Q031<br>91,Q5GRG2,Q5I0D1,Q63617,Q9R0T3                                                             |
| 1310 | 1,2,4,5,6,7<br>,19,21 | 3,8,17,18,<br>20,22,23,2<br>4 | 8  | B1H234,P11598,P15978,P36860,P50116,P52590,P80299,Q63474                                                                                                                         |
| 1311 | 1,2,4,5,6,7<br>,19,22 | 3,8,17,18,<br>20,21,23,2<br>4 | 11 | B1H234,P00762,P42854,P50116,P52590,P80299,Q03191,Q4FZU4,Q99041,Q9EQS0,Q9R168                                                                                                    |
| 1312 | 1,2,4,5,6,7<br>,19,23 | 3,8,17,18,<br>20,21,22,2<br>4 | 8  | B1H234,P00762,P42854,P50116,P52590,P80299,Q03191,Q9EQS0                                                                                                                         |
| 1313 | 1,2,4,5,6,7<br>,19,24 | 3,8,17,18,<br>20,21,22,2<br>3 | 9  | B1H234,P15978,P17988,P50116,P52590,P80299,Q4KLZ6,Q5M872,Q62761;Q62762;Q62763                                                                                                    |
| 1314 | 1,2,4,5,6,7<br>,20,21 | 3,8,17,18,<br>19,22,23,2<br>4 | 22 | B1H234,O55145,P01835,P02780,P0DP29;P0DP30;P0DP31,P11598,P15978,P19629,P22283,P368<br>60,P47967,P50116,P52590,P70549,P80299,Q03191,Q5GRG2,Q5I0D1,Q63617,Q91ZS3,Q9R0T3,<br>Q9Z0J6 |
| 1315 | 1,2,4,5,6,7<br>,20,22 | 3,8,17,18,<br>19,21,23,2<br>4 | 11 | B1H234,P0DP29;P0DP30;P0DP31,P11598,P23593,P42854,P50116,P52590,P80299,Q03191,Q5G<br>RG2,Q9Z0J6                                                                                  |
| 1316 | 1,2,4,5,6,7<br>,20,23 | 3,8,17,18,<br>19,21,22,2<br>4 | 11 | B1H234,P0DP29;P0DP30;P0DP31,P10758,P11598,P19629,P23739,P42854,P50116,P52590,P802<br>99,Q03191                                                                                  |
| 1317 | 1,2,4,5,6,7<br>,20,24 | 3,8,17,18,<br>19,21,22,2<br>3 | 12 | B1H234,P0DP29;P0DP30;P0DP31,P11598,P18418,P50116,P52590,P80299,Q03191,Q4KLZ6,Q5G<br>RG2,Q9JHB9,Q9Z0J6                                                                           |
| 1318 | 1,2,4,5,6,7<br>,21,22 | 3,8,17,18,<br>19,20,23,2<br>4 | 9  | B1H234,P01835,P17046,P36860,P50116,P52590,P80299,Q03191,Q9R168                                                                                                                  |
| 1319 | 1,2,4,5,6,7<br>,21,23 | 3,8,17,18,<br>19,20,22,2<br>4 | 12 | B1H234,P01835,P36860,P42854,P50116,P52590,P80299,Q03191,Q63474,Q63532,Q9JJ50,Q9R1<br>68                                                                                         |
| 1320 | 1,2,4,5,6,7<br>,21,24 | 3,8,17,18,<br>19,20,22,2<br>3 | 15 | B1H234,P01835,P02761,P15978,P19939,P30919,P36860,P50116,P52590,P80299,Q03191,Q4KLZ<br>6,Q63474,Q6AY61,Q9R168                                                                    |
| 1321 | 1,2,4,5,6,7<br>,22,23 | 3,8,17,18,<br>19,20,21,2<br>4 | 13 | B1H234,P10719,P23593,P42854,P50116,P52590,P80299,Q03191,Q63532,Q6P6R2,Q9EQS0,Q9R<br>168,Q9Z2L0                                                                                  |

|      |                       |                               |    |                                                                                                                                                                      |
|------|-----------------------|-------------------------------|----|----------------------------------------------------------------------------------------------------------------------------------------------------------------------|
| 1322 | 1,2,4,5,6,7<br>,22,24 | 3,8,17,18,<br>19,20,21,2<br>3 | 13 | B1H234,P10719,P23593,P30919,P36860,P52590,P70619,P80299,Q03191,Q4KLZ6,Q6P6R2,Q9E<br>QS0,Q9R168                                                                       |
| 1323 | 1,2,4,5,6,7<br>,23,24 | 3,8,17,18,<br>19,20,21,2<br>2 | 12 | B1H234,O08557,P36860,P50116,P52590,P70619,P80299,Q03191,Q4KLZ6,Q6P6R2,Q9EQS0,Q9J<br>J50                                                                              |
| 1324 | 1,2,4,5,6,8<br>,17,18 | 3,7,19,20,<br>21,22,23,2<br>4 | 11 | O70594,P02454,P13432,P16636,P18418,P23593,P52590,P97580,Q30KJ2,Q4KLZ6,Q9QZQ5                                                                                         |
| 1325 | 1,2,4,5,6,8<br>,17,19 | 3,7,18,20,<br>21,22,23,2<br>4 | 6  | P15399,P18418,P52590,P97580,Q30KJ2,Q9QZQ5                                                                                                                            |
| 1326 | 1,2,4,5,6,8<br>,17,20 | 3,7,18,19,<br>21,22,23,2<br>4 | 23 | D4A5U3,P02454,P06911,P12020,P13432,P15399,P17559,P18418,P19223,P25031,P36375,P5028<br>0,P52590,P55091,P97697,Q10758,Q30KJ2,Q5GRG2,Q6IMF3,Q6P6Q2,Q9JI85,Q9QZQ5,Q9Z0J6 |
| 1327 | 1,2,4,5,6,8<br>,17,21 | 3,7,18,19,<br>20,22,23,2<br>4 | 14 | B1H234,P02631,P18418,P35952,P36860,P52590,P97580,Q30KJ2,Q4FZU2,Q63474,Q6IFU8,Q6IM<br>F3,Q6P6Q2,Q9QZQ5                                                                |
| 1328 | 1,2,4,5,6,8<br>,17,22 | 3,7,18,19,<br>20,21,23,2<br>4 | 8  | O54858,P15399,P18418,P20760,P23593,P52590,P97580,Q30KJ2                                                                                                              |
| 1329 | 1,2,4,5,6,8<br>,17,23 | 3,7,18,19,<br>20,21,22,2<br>4 | 11 | O54858,O70594,P18418,P20760,P23593,P42854,P52590,P97580,Q09030,Q30KJ2,Q63532                                                                                         |
| 1330 | 1,2,4,5,6,8<br>,17,24 | 3,7,18,19,<br>20,21,22,2<br>3 | 12 | P01039,P18418,P20760,P23593,P36860,P52590,Q30KJ2,Q4FZU2,Q4KLZ6,Q63474,Q6IMF3,Q6P<br>6Q2                                                                              |
| 1331 | 1,2,4,5,6,8<br>,18,19 | 3,7,17,20,<br>21,22,23,2<br>4 | 9  | P15399,P18418,P42854,P52590,P97580,Q30KJ2,Q4KLZ6,Q91ZS3,Q9QZQ5                                                                                                       |
| 1332 | 1,2,4,5,6,8<br>,18,20 | 3,7,17,19,<br>21,22,23,2<br>4 | 21 | P02454,P06911,P12020,P13432,P15399,P17559,P18418,P25031,P36375,P50280,P52590,Q0319<br>1,Q05702,Q10758,Q30KJ2,Q4KLZ6,Q5GRG2,Q6RY07,Q91ZS3,Q9JI85,Q9QZQ5               |
| 1333 | 1,2,4,5,6,8<br>,18,21 | 3,7,17,19,<br>20,22,23,2<br>4 | 11 | B1H234,P02631,P18418,P35952,P36860,P52590,P97580,Q30KJ2,Q4KLZ6,Q91ZS3,Q9QZQ5                                                                                         |
| 1334 | 1,2,4,5,6,8<br>,18,22 | 3,7,17,19,<br>20,21,23,2<br>4 | 13 | O54858,P15399,P16636,P18418,P20762,P23593,P52590,P54921,P97580,Q03191,Q30KJ2,Q4KLZ<br>6,Q91ZS3                                                                       |

|      |                       |                               |    |                                                                                                                                                                                                             |
|------|-----------------------|-------------------------------|----|-------------------------------------------------------------------------------------------------------------------------------------------------------------------------------------------------------------|
| 1335 | 1,2,4,5,6,8<br>,18,23 | 3,7,17,19,<br>20,21,22,2<br>4 | 19 | O54858,O70594,P16636,P18418,P20760,P20762,P23785,P42854,P52590,P54921,P97580,Q0319<br>1,Q30KJ2,Q4KLZ6,Q63532,Q91ZS3,Q99MH3,Q9JJ50,Q9Z2L0                                                                    |
| 1336 | 1,2,4,5,6,8<br>,18,24 | 3,7,17,19,<br>20,21,22,2<br>3 | 8  | O54858,P18418,P23593,P36860,P52590,Q30KJ2,Q4KLZ6,Q91ZS3                                                                                                                                                     |
| 1337 | 1,2,4,5,6,8<br>,19,20 | 3,7,17,18,<br>21,22,23,2<br>4 | 20 | D4A5U3,P02780,P06911,P12020,P14046,P15399,P18418,P19629,P22282,P25031,P35952,P3637<br>4,P42854,P50280,P52590,P97580,Q30KJ2,Q5GRG2,Q68G31,Q9JI85                                                             |
| 1338 | 1,2,4,5,6,8<br>,19,21 | 3,7,17,18,<br>20,22,23,2<br>4 | 13 | B1H234,P14046,P18418,P30919,P35952,P42854,P52590,P97580,Q10743,Q30KJ2,Q63474,Q66H<br>69,Q9JI85                                                                                                              |
| 1339 | 1,2,4,5,6,8<br>,19,22 | 3,7,17,18,<br>20,21,23,2<br>4 | 9  | O54858,P00507,P15399,P19218,P30919,P42854,P52590,P97580,Q30KJ2                                                                                                                                              |
| 1340 | 1,2,4,5,6,8<br>,19,23 | 3,7,17,18,<br>20,21,22,2<br>4 | 10 | O54858,P00507,P18418,P20760,P42854,P52590,P97580,Q30KJ2,Q63532,Q8CJD3                                                                                                                                       |
| 1341 | 1,2,4,5,6,8<br>,19,24 | 3,7,17,18,<br>20,21,22,2<br>3 | 10 | O54728,P15399,P18418,P30919,P52590,P97580,Q10743,Q30KJ2,Q4KLZ6,Q68G31                                                                                                                                       |
| 1342 | 1,2,4,5,6,8<br>,20,21 | 3,7,17,18,<br>19,22,23,2<br>4 | 28 | B1H234,D4A5U3,O55145,P02631,P02780,P06911,P12020,P14046,P18418,P19629,P25031,P359<br>52,P36375,P42854,P50280,P52590,P70549,Q03191,Q05702,Q10743,Q10758,Q5GRG2,Q6IFU8,<br>Q6IMF3,Q6P6Q2,Q91ZS3,Q9JI85,Q9QZQ5 |
| 1343 | 1,2,4,5,6,8<br>,20,22 | 3,7,17,18,<br>19,21,23,2<br>4 | 17 | O54858,P06911,P12020,P15399,P18418,P19218,P19629,P23593,P25031,P42854,P50280,P5259<br>0,P97580,Q03191,Q30KJ2,Q5GRG2,Q91ZS3                                                                                  |
| 1344 | 1,2,4,5,6,8<br>,20,23 | 3,7,17,18,<br>19,21,22,2<br>4 | 20 | P06911,P12020,P17559,P18418,P19132,P19629,P20760,P23739,P25031,P36375,P42854,P50280<br>,P52590,Q03191,Q05702,Q10758,Q30KJ2,Q5GRG2,Q63532,Q91ZS3                                                             |
| 1345 | 1,2,4,5,6,8<br>,20,24 | 3,7,17,18,<br>19,21,22,2<br>3 | 18 | P06911,P12020,P15399,P18418,P25031,P36375,P50280,P52590,Q03191,Q10743,Q10758,Q4KL<br>Z6,Q5GRG2,Q6IFU8,Q6IMF3,Q6P6Q2,Q91ZS3,Q9JI85                                                                           |
| 1346 | 1,2,4,5,6,8<br>,21,22 | 3,7,17,18,<br>19,20,23,2<br>4 | 12 | B1H234,O54858,P15399,P23593,P30919,P36860,P52590,P97580,Q10743,Q30KJ2,Q6AYC4,Q91<br>ZS3                                                                                                                     |
| 1347 | 1,2,4,5,6,8<br>,21,23 | 3,7,17,18,<br>19,20,22,2<br>4 | 12 | O54858,P18418,P30919,P35952,P36860,P42854,P52590,P54921,Q09030,Q63474,Q63532,Q9JJ5<br>0                                                                                                                     |



|      |                        |                               |    |                                                                                                                            |
|------|------------------------|-------------------------------|----|----------------------------------------------------------------------------------------------------------------------------|
| 1348 | 1,2,4,5,6,8<br>,21,24  | 3,7,17,18,<br>19,20,22,2<br>3 | 15 | B1H234,P07174,P18418,P30919,P35952,P36860,P52590,Q10743,Q4FZU2,Q4KLZ6,Q63474,Q6IF<br>U8,Q6IMF3,Q6P6Q2,Q91ZS3               |
| 1349 | 1,2,4,5,6,8<br>,22,23  | 3,7,17,18,<br>19,20,21,2<br>4 | 17 | O54858,P00507,P15399,P20760,P23593,P30919,P42854,P52590,P54921,P97580,Q03191,Q0903<br>0,Q30KJ2,Q63532,Q6P6R2,Q99MH3,Q9Z2L0 |
| 1350 | 1,2,4,5,6,8<br>,22,24  | 3,7,17,18,<br>19,20,21,2<br>3 | 12 | O54858,P00507,P15399,P20760,P23593,P30919,P52590,P97580,Q10743,Q30KJ2,Q4KLZ6,Q6P6<br>R2                                    |
| 1351 | 1,2,4,5,6,8<br>,23,24  | 3,7,17,18,<br>19,20,21,2<br>2 | 14 | O54858,P00507,P18418,P20760,P23593,P30919,P36860,P42854,P52590,Q09030,Q4KLZ6,Q635<br>32,Q6P6R2,Q9JJ50                      |
| 1352 | 1,2,4,5,6,1<br>7,18,19 | 3,7,8,20,2<br>1,22,23,24      | 4  | B1H234,P35280,P52590,Q4KLZ6                                                                                                |
| 1353 | 1,2,4,5,6,1<br>7,18,20 | 3,7,8,19,2<br>1,22,23,24      | 8  | P19223,P35280,P52590,P55091,Q03191,Q4KLZ6,Q5GRG2,Q9Z0J6                                                                    |
| 1354 | 1,2,4,5,6,1<br>7,18,21 | 3,7,8,19,2<br>0,22,23,24      | 5  | B1H234,P35280,P36860,P52590,Q4KLZ6                                                                                         |
| 1355 | 1,2,4,5,6,1<br>7,18,22 | 3,7,8,19,2<br>0,21,23,24      | 6  | P16636,P52590,Q03191,Q4KLZ6,Q9EQS0,Q9Z0J6                                                                                  |
| 1356 | 1,2,4,5,6,1<br>7,18,23 | 3,7,8,19,2<br>0,21,22,24      | 6  | P16636,P35280,P52590,Q03191,Q4KLZ6,Q9EQS0                                                                                  |
| 1357 | 1,2,4,5,6,1<br>7,18,24 | 3,7,8,19,2<br>0,21,22,23      | 6  | B1H234,P01039,P35280,P36860,P52590,Q4KLZ6                                                                                  |
| 1358 | 1,2,4,5,6,1<br>7,19,20 | 3,7,8,18,2<br>1,22,23,24      | 3  | P19223,P35280,P52590                                                                                                       |
| 1359 | 1,2,4,5,6,1<br>7,19,21 | 3,7,8,18,2<br>0,22,23,24      | 4  | B1H234,P35280,P36860,P52590                                                                                                |
| 1360 | 1,2,4,5,6,1<br>7,19,22 | 3,7,8,18,2<br>0,21,23,24      | 2  | P52590,Q9EQS0                                                                                                              |
| 1361 | 1,2,4,5,6,1<br>7,19,23 | 3,7,8,18,2<br>0,21,22,24      | 2  | P35280,P52590                                                                                                              |
| 1362 | 1,2,4,5,6,1<br>7,19,24 | 3,7,8,18,2<br>0,21,22,23      | 5  | B1H234,P01039,P35280,P52590,Q4KLZ6                                                                                         |
| 1363 | 1,2,4,5,6,1<br>7,20,21 | 3,7,8,18,1<br>9,22,23,24      | 9  | B1H234,P19223,P35280,P36860,P52590,P55091,Q03191,Q5I0J9,Q9Z0J6                                                             |
| 1364 | 1,2,4,5,6,1<br>7,20,22 | 3,7,8,18,1<br>9,21,23,24      | 4  | P19223,P52590,Q03191,Q9Z0J6                                                                                                |
| 1365 | 1,2,4,5,6,1<br>7,20,23 | 3,7,8,18,1<br>9,21,22,24      | 7  | P19223,P23739,P35280,P52590,P55091,Q03191,Q63467                                                                           |

|      |                        |                          |    |                                                                                            |
|------|------------------------|--------------------------|----|--------------------------------------------------------------------------------------------|
| 1366 | 1,2,4,5,6,1<br>7,20,24 | 3,7,8,18,1<br>9,21,22,23 | 7  | P01039,P19223,P35280,P52590,Q03191,Q4KLZ6,Q9Z0J6                                           |
| 1367 | 1,2,4,5,6,1<br>7,21,22 | 3,7,8,18,1<br>9,20,23,24 | 4  | B1H234,P36860,P52590,Q9R168                                                                |
| 1368 | 1,2,4,5,6,1<br>7,21,23 | 3,7,8,18,1<br>9,20,22,24 | 4  | B1H234,P35280,P36860,P52590                                                                |
| 1369 | 1,2,4,5,6,1<br>7,21,24 | 3,7,8,18,1<br>9,20,22,23 | 10 | B1H234,P01039,P19939,P35280,P36860,P52590,Q4KLZ6,Q63474,Q6AY61,Q9R168                      |
| 1370 | 1,2,4,5,6,1<br>7,22,23 | 3,7,8,18,1<br>9,20,21,24 | 4  | P52590,Q03191,Q9EQS0,Q9WTT6                                                                |
| 1371 | 1,2,4,5,6,1<br>7,22,24 | 3,7,8,18,1<br>9,20,21,23 | 10 | D3ZUC6,P01039,P23593,P36860,P52590,Q4KLZ6,Q6P6R2,Q9EQS0,Q9R168,Q9WTT6                      |
| 1372 | 1,2,4,5,6,1<br>7,23,24 | 3,7,8,18,1<br>9,20,21,22 | 6  | P01039,P35280,P36860,P52590,Q4KLZ6,Q9WTT6                                                  |
| 1373 | 1,2,4,5,6,1<br>8,19,20 | 3,7,8,17,2<br>1,22,23,24 | 5  | B1H234,P35280,P52590,Q03191,Q4KLZ6                                                         |
| 1374 | 1,2,4,5,6,1<br>8,19,21 | 3,7,8,17,2<br>0,22,23,24 | 4  | B1H234,P35280,P52590,Q4KLZ6                                                                |
| 1375 | 1,2,4,5,6,1<br>8,19,22 | 3,7,8,17,2<br>0,21,23,24 | 4  | B1H234,P52590,Q4KLZ6,Q9EQS0                                                                |
| 1376 | 1,2,4,5,6,1<br>8,19,23 | 3,7,8,17,2<br>0,21,22,24 | 6  | P16636,P35280,P52590,Q4KLZ6,Q9EQS0,Q9Z2L0                                                  |
| 1377 | 1,2,4,5,6,1<br>8,19,24 | 3,7,8,17,2<br>0,21,22,23 | 5  | B1H234,P35280,P52590,Q4KLZ6,Q9WTT6                                                         |
| 1378 | 1,2,4,5,6,1<br>8,20,21 | 3,7,8,17,1<br>9,22,23,24 | 8  | B1H234,O55145,P35280,P52590,P70549,Q03191,Q4KLZ6,Q91ZS3                                    |
| 1379 | 1,2,4,5,6,1<br>8,20,22 | 3,7,8,17,1<br>9,21,23,24 | 5  | P52590,Q03191,Q4KLZ6,Q9EQS0,Q9Z0J6                                                         |
| 1380 | 1,2,4,5,6,1<br>8,20,23 | 3,7,8,17,1<br>9,21,22,24 | 7  | P04355,P16636,P35280,P52590,Q03191,Q4KLZ6,Q9EQS0                                           |
| 1381 | 1,2,4,5,6,1<br>8,20,24 | 3,7,8,17,1<br>9,21,22,23 | 4  | B1H234,P35280,Q03191,Q4KLZ6                                                                |
| 1382 | 1,2,4,5,6,1<br>8,21,22 | 3,7,8,17,1<br>9,20,23,24 | 9  | B1H234,P13676,P36860,P52590,P54921,Q03191,Q4KLZ6,Q9EQS0,Q9WTT6                             |
| 1383 | 1,2,4,5,6,1<br>8,21,23 | 3,7,8,17,1<br>9,20,22,24 | 11 | B1H234,O89117,P16636,P35280,P36860,P52590,P54921,Q03191,Q4KLZ6,Q9EQS0,Q9JJ50               |
| 1384 | 1,2,4,5,6,1<br>8,21,24 | 3,7,8,17,1<br>9,20,22,23 | 8  | B1H234,O89117,P35280,P36860,Q03191,Q4KLZ6,Q9JJ50,Q9WTT6                                    |
| 1385 | 1,2,4,5,6,1<br>8,22,23 | 3,7,8,17,1<br>9,20,21,24 | 13 | P13676,P16636,P30120,P54921,Q03191,Q4KLZ6,Q63532,Q6P6R2,Q99MH3,Q9EQS0,Q9QX74,Q9WTT6,Q9Z2L0 |

|      |                        |                          |                                                                          |
|------|------------------------|--------------------------|--------------------------------------------------------------------------|
| 1386 | 1,2,4,5,6,1<br>8,22,24 | 3,7,8,17,1<br>9,20,21,23 | 9 B1H234,D3ZUC6,P13676,Q03191,Q4KLZ6,Q6P6R2,Q9EQS0,Q9QX74,Q9WTT6         |
| 1387 | 1,2,4,5,6,1<br>8,23,24 | 3,7,8,17,1<br>9,20,21,22 | 10 P13676,P16636,P35280,Q03191,Q4KLZ6,Q6P6R2,Q9EQS0,Q9JJ50,Q9QX74,Q9WTT6 |
| 1388 | 1,2,4,5,6,1<br>9,20,21 | 3,7,8,17,1<br>8,22,23,24 | 5 B1H234,P0DP29;P0DP30;P0DP31,P35280,P52590,Q5I0J9                       |
| 1389 | 1,2,4,5,6,1<br>9,20,22 | 3,7,8,17,1<br>8,21,23,24 | 4 P19218,P42854,P52590,Q03191                                            |
| 1390 | 1,2,4,5,6,1<br>9,20,23 | 3,7,8,17,1<br>8,21,22,24 | 6 P10758,P23739,P35280,P42854,P52590,Q03191                              |
| 1391 | 1,2,4,5,6,1<br>9,20,24 | 3,7,8,17,1<br>8,21,22,23 | 5 B1H234,P35280,P52590,Q4KLZ6,Q68G31                                     |
| 1392 | 1,2,4,5,6,1<br>9,21,22 | 3,7,8,17,1<br>8,20,23,24 | 3 B1H234,P30919,P52590                                                   |
| 1393 | 1,2,4,5,6,1<br>9,21,23 | 3,7,8,17,1<br>8,20,22,24 | 4 B1H234,P35280,P42854,P52590                                            |
| 1394 | 1,2,4,5,6,1<br>9,21,24 | 3,7,8,17,1<br>8,20,22,23 | 8 B1H234,P07174,P30919,P35280,P36860,P52590,Q4KLZ6,Q63474                |
| 1395 | 1,2,4,5,6,1<br>9,22,23 | 3,7,8,17,1<br>8,20,21,24 | 8 P00507,P13676,P42854,P52590,Q6P6R2,Q811M5,Q9EQS0,Q9WTT6                |
| 1396 | 1,2,4,5,6,1<br>9,22,24 | 3,7,8,17,1<br>8,20,21,23 | 10 B1H234,P00507,P13676,P30919,P52590,Q4KLZ6,Q6P6R2,Q9EQS0,Q9QX74,Q9WTT6 |
| 1397 | 1,2,4,5,6,1<br>9,23,24 | 3,7,8,17,1<br>8,20,21,22 | 8 P00507,P35280,P52590,Q4KLZ6,Q6P6R2,Q9EQS0,Q9QX74,Q9WTT6                |
| 1398 | 1,2,4,5,6,2<br>0,21,22 | 3,7,8,17,1<br>8,19,23,24 | 5 B1H234,O55145,P52590,Q03191,Q9Z0J6                                     |
| 1399 | 1,2,4,5,6,2<br>0,21,23 | 3,7,8,17,1<br>8,19,22,24 | 4 B1H234,P35280,P52590,Q03191                                            |
| 1400 | 1,2,4,5,6,2<br>0,21,24 | 3,7,8,17,1<br>8,19,22,23 | 6 B1H234,O55145,P35280,P36860,Q03191,Q4KLZ6                              |
| 1401 | 1,2,4,5,6,2<br>0,22,23 | 3,7,8,17,1<br>8,19,21,24 | 6 P23739,P42854,Q03191,Q6P6R2,Q9EQS0,Q9QX74                              |
| 1402 | 1,2,4,5,6,2<br>0,22,24 | 3,7,8,17,1<br>8,19,21,23 | 7 P21674,P22006,Q03191,Q4KLZ6,Q6P6R2,Q9QX74,Q9Z0J6                       |
| 1403 | 1,2,4,5,6,2<br>0,23,24 | 3,7,8,17,1<br>8,19,21,22 | 8 P23739,P35280,Q03191,Q4KLZ6,Q5QE79,Q6P6R2,Q9QX74,Q9QYP1                |
| 1404 | 1,2,4,5,6,2<br>1,22,23 | 3,7,8,17,1<br>8,19,20,24 | 9 B1H234,P13676,P30919,P36860,P54921,Q03191,Q63532,Q9EQS0,Q9WTT6         |
| 1405 | 1,2,4,5,6,2<br>1,22,24 | 3,7,8,17,1<br>8,19,20,23 | 7 B1H234,P13676,P30919,P36860,Q4KLZ6,Q9R168,Q9WTT6                       |

|      |                        |                               |            |                                                                                                                        |
|------|------------------------|-------------------------------|------------|------------------------------------------------------------------------------------------------------------------------|
| 1406 | 1,2,4,5,6,2<br>1,23,24 | 3,7,8,17,1<br>8,19,20,22      | 10         | B1H234,P13676,P30919,P35280,P36860,Q03191,Q4KLZ6,Q63474,Q9JJ50,Q9WTT6                                                  |
| 1407 | 1,2,4,5,6,2<br>2,23,24 | 3,7,8,17,1<br>8,19,20,21      | 13         | D3ZUC6,P00507,P13676,P30919,P47727,Q03191,Q4KLZ6,Q63532,Q6P6R2,Q811M5,Q9EQS0,Q9QX74,Q9WTT6                             |
| 1408 | 1,2,4,5,7,8<br>,17,18  | 3,6,19,20,<br>21,22,23,2<br>4 | 5          | O70594,P18418,Q03191,Q811M5,Q9Z1F2                                                                                     |
| 1409 | 1,2,4,5,7,8<br>,17,19  | 3,6,18,20,<br>21,22,23,2<br>4 | 7          | iRT-Kit_WR_fusion,P20646,P22006,Q66H69,Q6IFU8,Q6IMF3,Q6P6Q2                                                            |
| 1410 | 1,2,4,5,7,8<br>,17,20  | 3,6,18,19,<br>21,22,23,2<br>4 | 17         | D4A5U3,P02780,P06911,P19223,P97697,Q03191,Q10758,Q4FZU2,Q4G075,Q5GRG2,Q62946,Q6IFU8,Q6IMF3,Q6P6Q2,Q811M5,Q9JHB9,Q9Z0J6 |
| 1411 | 1,2,4,5,7,8<br>,17,21  | 3,6,18,19,<br>20,22,23,2<br>4 | iRT-<br>16 | Kit_WR_fusion,O70594,P06760,P19939,P22006,P36860,P70549,Q00715,Q4FZU2,Q63474,Q6IFU8,Q6IMF3,Q6P6Q2,Q811M5,Q9QX74,Q9Z1F2 |
| 1412 | 1,2,4,5,7,8<br>,17,22  | 3,6,18,19,<br>20,21,23,2<br>4 | 6          | P23593,P27590,Q30KJ2,Q6IMF3,Q6P6Q2,Q9Z1F2                                                                              |
| 1413 | 1,2,4,5,7,8<br>,17,23  | 3,6,18,19,<br>20,21,22,2<br>4 | 7          | O70594,P19132,P20760,Q03191,Q6IFU8,Q6IMF3,Q6P6Q2                                                                       |
| 1414 | 1,2,4,5,7,8<br>,17,24  | 3,6,18,19,<br>20,21,22,2<br>3 | 7          | P19939,P36860,Q4FZU2,Q6IFU8,Q6IMF3,Q6P6Q2,Q9Z1F2                                                                       |
| 1415 | 1,2,4,5,7,8<br>,18,19  | 3,6,17,20,<br>21,22,23,2<br>4 | 3          | P18418,P20762,Q66H69                                                                                                   |
| 1416 | 1,2,4,5,7,8<br>,18,20  | 3,6,17,19,<br>21,22,23,2<br>4 | 15         | D4A5U3,P02780,P06911,P18418,P50280,P70549,P97697,Q03191,Q10758,Q4G075,Q5GRG2,Q6P6Q2,Q811M5,Q91ZS3,Q9JHB9               |
| 1417 | 1,2,4,5,7,8<br>,18,21  | 3,6,17,19,<br>20,22,23,2<br>4 | iRT-<br>12 | Kit_WR_fusion,O89117,P36860,P70549,Q00715,Q03191,Q6IFU8,Q6IMF3,Q6P6Q2,Q811M5,Q91ZS3,Q9Z1F2                             |
| 1418 | 1,2,4,5,7,8<br>,18,22  | 3,6,17,19,<br>20,21,23,2<br>4 | 6          | P20762,P23593,P27590,Q03191,Q30KJ2,Q9Z1F2                                                                              |
| 1419 | 1,2,4,5,7,8<br>,18,23  | 3,6,17,19,<br>20,21,22,2<br>4 | 3          | O70594,P20762,Q03191                                                                                                   |

|      |                       |                               |    |                                                                                                                                                                              |
|------|-----------------------|-------------------------------|----|------------------------------------------------------------------------------------------------------------------------------------------------------------------------------|
| 1420 | 1,2,4,5,7,8<br>,18,24 | 3,6,17,19,<br>20,21,22,2<br>3 | 9  | O89117,P18418,P20762,Q03191,Q4KLZ6,Q6IMF3,Q6P6Q2,Q91ZS3,Q9Z1F2                                                                                                               |
| 1421 | 1,2,4,5,7,8<br>,19,20 | 3,6,17,18,<br>21,22,23,2<br>4 | 17 | D4A5U3,iRT-<br>Kit_WR_fusion,P02780,P22282,P36374,P47967,P50280,P97697,Q4G075,Q5I0D1,Q66H69,Q6IFU<br>8,Q6IMF3,Q6P6Q2,Q6TMA8,Q812E4,Q8CJD3                                    |
| 1422 | 1,2,4,5,7,8<br>,19,21 | 3,6,17,18,<br>20,22,23,2<br>4 | 9  | iRT-Kit_WR_fusion,P06760,P22006,Q00715,Q63474,Q66H69,Q6IFU8,Q6IMF3,Q6P6Q2                                                                                                    |
| 1423 | 1,2,4,5,7,8<br>,19,22 | 3,6,17,18,<br>20,21,23,2<br>4 | 4  | iRT-Kit_WR_fusion,P27590,Q30KJ2,Q66H69                                                                                                                                       |
| 1424 | 1,2,4,5,7,8<br>,19,23 | 3,6,17,18,<br>20,21,22,2<br>4 | 4  | iRT-Kit_WR_fusion,Q66H69,Q6IMF3,Q8CJD3                                                                                                                                       |
| 1425 | 1,2,4,5,7,8<br>,19,24 | 3,6,17,18,<br>20,21,22,2<br>3 | 7  | iRT-Kit_WR_fusion,O54728,Q66H69,Q6IFU8,Q6IMF3,Q6P6Q2,Q6TMA8                                                                                                                  |
| 1426 | 1,2,4,5,7,8<br>,20,21 | 3,6,17,18,<br>19,22,23,2<br>4 | 22 | D4A5U3,iRT-<br>Kit_WR_fusion,P02780,P06760,P22273,P47967,P55159,P70549,P97697,Q00715,Q03191,Q10758<br>,Q4FZU2,Q4G075,Q5I0D1,Q6IFU8,Q6IMF3,Q6P6Q2,Q811M5,Q812E4,Q91ZS3,Q9JHB9 |
| 1427 | 1,2,4,5,7,8<br>,20,22 | 3,6,17,18,<br>19,21,23,2<br>4 | 9  | D4A5U3,iRT-Kit_WR_fusion,P02780,P23593,Q03191,Q4G075,Q6IMF3,Q6P6Q2,Q9Z0J6                                                                                                    |
| 1428 | 1,2,4,5,7,8<br>,20,23 | 3,6,17,18,<br>19,21,22,2<br>4 | 11 | D4A5U3,iRT-<br>Kit_WR_fusion,P10758,P19132,P23739,P97697,Q03191,Q4G075,Q6IFU8,Q6IMF3,Q6P6Q2                                                                                  |
| 1429 | 1,2,4,5,7,8<br>,20,24 | 3,6,17,18,<br>19,21,22,2<br>3 | 12 | D4A5U3,P02780,P97697,Q03191,Q4FZU2,Q4G075,Q6IFU8,Q6IMF3,Q6P6Q2,Q6TMA8,Q812E4,<br>Q9JHB9                                                                                      |
| 1430 | 1,2,4,5,7,8<br>,21,22 | 3,6,17,18,<br>19,20,23,2<br>4 | 7  | iRT-Kit_WR_fusion,P70549,Q03191,Q6IFU8,Q6IMF3,Q6P6Q2,Q9Z1F2                                                                                                                  |
| 1431 | 1,2,4,5,7,8<br>,21,23 | 3,6,17,18,<br>19,20,22,2<br>4 | 10 | iRT-Kit_WR_fusion,P19132,P22006,P36860,P70549,Q03191,Q63474,Q6IFU8,Q6IMF3,Q6P6Q2                                                                                             |
| 1432 | 1,2,4,5,7,8<br>,21,24 | 3,6,17,18,<br>19,20,22,2<br>3 | 9  | iRT-Kit_WR_fusion,P19939,P36860,Q4FZU2,Q63474,Q6IFU8,Q6IMF3,Q6P6Q2,Q9Z1F2                                                                                                    |

|      |                        |                               |                                             |
|------|------------------------|-------------------------------|---------------------------------------------|
| 1433 | 1,2,4,5,7,8<br>,22,23  | 3,6,17,18,<br>19,20,21,2<br>4 | 6 P20760,P20762,P23593,P27590,Q03191,Q6P6R2 |
| 1434 | 1,2,4,5,7,8<br>,22,24  | 3,6,17,18,<br>19,20,21,2<br>3 | 5 P23593,Q03191,Q6IMF3,Q6P6Q2,Q6P6R2        |
| 1435 | 1,2,4,5,7,8<br>,23,24  | 3,6,17,18,<br>19,20,21,2<br>2 | 6 P20760,Q03191,Q6IFU8,Q6IMF3,Q6P6Q2,Q6P6R2 |
| 1436 | 1,2,4,5,7,1<br>7,18,19 | 3,6,8,20,2<br>1,22,23,24      | 1 P13265                                    |
| 1437 | 1,2,4,5,7,1<br>7,18,20 | 3,6,8,19,2<br>1,22,23,24      | 4 P19223,Q03191,Q811M5,Q9Z0J6               |
| 1438 | 1,2,4,5,7,1<br>7,18,21 | 3,6,8,19,2<br>0,22,23,24      | 5 P19939,P22006,P36860,Q03191,Q811M5        |
| 1439 | 1,2,4,5,7,1<br>7,18,22 | 3,6,8,19,2<br>0,21,23,24      | 2 Q03191,Q9Z0J6                             |
| 1440 | 1,2,4,5,7,1<br>7,18,23 | 3,6,8,19,2<br>0,21,22,24      | 1 Q03191                                    |
| 1441 | 1,2,4,5,7,1<br>7,18,24 | 3,6,8,19,2<br>0,21,22,23      | 3 P19939,Q03191,Q4KLZ6                      |
| 1442 | 1,2,4,5,7,1<br>7,19,20 | 3,6,8,18,2<br>1,22,23,24      | 3 P19223,P20646,P36374                      |
| 1443 | 1,2,4,5,7,1<br>7,19,21 | 3,6,8,18,2<br>0,22,23,24      | 4 P19939,P22006,Q62761;Q62762;Q62763,Q9R168 |
| 1444 | 1,2,4,5,7,1<br>7,19,22 | 3,6,8,18,2<br>0,21,23,24      | 2 P80299,Q9R168                             |
| 1445 | 1,2,4,5,7,1<br>7,19,23 | 3,6,8,18,2<br>0,21,22,24      | 0                                           |
| 1446 | 1,2,4,5,7,1<br>7,19,24 | 3,6,8,18,2<br>0,21,22,23      | 3 P54921,Q62761;Q62762;Q62763,Q9R168        |
| 1447 | 1,2,4,5,7,1<br>7,20,21 | 3,6,8,18,1<br>9,22,23,24      | 6 P19223,P70549,P97697,Q03191,Q811M5,Q9Z0J6 |
| 1448 | 1,2,4,5,7,1<br>7,20,22 | 3,6,8,18,1<br>9,21,23,24      | 4 P19223,P80299,Q03191,Q9Z0J6               |
| 1449 | 1,2,4,5,7,1<br>7,20,23 | 3,6,8,18,1<br>9,21,22,24      | 4 P10758,P19223,P23739,Q03191               |
| 1450 | 1,2,4,5,7,1<br>7,20,24 | 3,6,8,18,1<br>9,21,22,23      | 5 P19223,Q03191,Q811M5,Q9QYP1,Q9Z0J6        |
| 1451 | 1,2,4,5,7,1<br>7,21,22 | 3,6,8,18,1<br>9,20,23,24      | 3 P36860,Q03191,Q9R168                      |

|      |                        |                          |   |                                                  |
|------|------------------------|--------------------------|---|--------------------------------------------------|
| 1452 | 1,2,4,5,7,1<br>7,21,23 | 3,6,8,18,1<br>9,20,22,24 | 4 | P22006,P36860,Q03191,Q9R168                      |
| 1453 | 1,2,4,5,7,1<br>7,21,24 | 3,6,8,18,1<br>9,20,22,23 | 6 | P01039,P19939,P36860,Q63474,Q6AY61,Q9R168        |
| 1454 | 1,2,4,5,7,1<br>7,22,23 | 3,6,8,18,1<br>9,20,21,24 | 4 | P80299,Q03191,Q9EQS0,Q9R168                      |
| 1455 | 1,2,4,5,7,1<br>7,22,24 | 3,6,8,18,1<br>9,20,21,23 | 2 | Q03191,Q9R168                                    |
| 1456 | 1,2,4,5,7,1<br>7,23,24 | 3,6,8,18,1<br>9,20,21,22 | 3 | P36860,Q03191,Q9R168                             |
| 1457 | 1,2,4,5,7,1<br>8,19,20 | 3,6,8,17,2<br>1,22,23,24 | 5 | P47967,P80299,P97840,Q03191,Q5I0D1               |
| 1458 | 1,2,4,5,7,1<br>8,19,21 | 3,6,8,17,2<br>0,22,23,24 | 1 | O89117                                           |
| 1459 | 1,2,4,5,7,1<br>8,19,22 | 3,6,8,17,2<br>0,21,23,24 | 3 | P80299,Q03191,Q9EQS0                             |
| 1460 | 1,2,4,5,7,1<br>8,19,23 | 3,6,8,17,2<br>0,21,22,24 | 2 | P80299,Q03191                                    |
| 1461 | 1,2,4,5,7,1<br>8,19,24 | 3,6,8,17,2<br>0,21,22,23 | 1 | Q4KLZ6                                           |
| 1462 | 1,2,4,5,7,1<br>8,20,21 | 3,6,8,17,1<br>9,22,23,24 | 5 | P47967,P70549,P97840,Q03191,Q811M5               |
| 1463 | 1,2,4,5,7,1<br>8,20,22 | 3,6,8,17,1<br>9,21,23,24 | 3 | P80299,Q03191,Q9Z0J6                             |
| 1464 | 1,2,4,5,7,1<br>8,20,23 | 3,6,8,17,1<br>9,21,22,24 | 2 | P10758,Q03191                                    |
| 1465 | 1,2,4,5,7,1<br>8,20,24 | 3,6,8,17,1<br>9,21,22,23 | 3 | Q03191,Q4KLZ6,Q9QYP1                             |
| 1466 | 1,2,4,5,7,1<br>8,21,22 | 3,6,8,17,1<br>9,20,23,24 | 4 | O89117,P70549,P80299,Q03191                      |
| 1467 | 1,2,4,5,7,1<br>8,21,23 | 3,6,8,17,1<br>9,20,22,24 | 5 | O89117,P36860,P70549,Q03191,Q9JJ50               |
| 1468 | 1,2,4,5,7,1<br>8,21,24 | 3,6,8,17,1<br>9,20,22,23 | 5 | O89117,P19939,P36860,Q03191,Q4KLZ6               |
| 1469 | 1,2,4,5,7,1<br>8,22,23 | 3,6,8,17,1<br>9,20,21,24 | 5 | P30120,P80299,Q03191,Q6P6R2,Q9EQS0               |
| 1470 | 1,2,4,5,7,1<br>8,22,24 | 3,6,8,17,1<br>9,20,21,23 | 4 | Q03191,Q4KLZ6,Q6P6R2,Q9EQS0                      |
| 1471 | 1,2,4,5,7,1<br>8,23,24 | 3,6,8,17,1<br>9,20,21,22 | 7 | O89117,Q03191,Q4KLZ6,Q6AYQ8,Q6P6R2,Q9JJ50,Q9WVK7 |

|      |                        |                          |   |                                                  |
|------|------------------------|--------------------------|---|--------------------------------------------------|
| 1472 | 1,2,4,5,7,1<br>9,20,21 | 3,6,8,17,1<br>8,22,23,24 | 7 | P08649,P47967,P55159,P70549,P80299,Q03191,Q5I0D1 |
| 1473 | 1,2,4,5,7,1<br>9,20,22 | 3,6,8,17,1<br>8,21,23,24 | 2 | P80299,Q03191                                    |
| 1474 | 1,2,4,5,7,1<br>9,20,23 | 3,6,8,17,1<br>8,21,22,24 | 4 | P10758,P23739,P80299,Q03191                      |
| 1475 | 1,2,4,5,7,1<br>9,20,24 | 3,6,8,17,1<br>8,21,22,23 | 0 |                                                  |
| 1476 | 1,2,4,5,7,1<br>9,21,22 | 3,6,8,17,1<br>8,20,23,24 | 2 | P80299,Q9R168                                    |
| 1477 | 1,2,4,5,7,1<br>9,21,23 | 3,6,8,17,1<br>8,20,22,24 | 2 | P08649,P80299                                    |
| 1478 | 1,2,4,5,7,1<br>9,21,24 | 3,6,8,17,1<br>8,20,22,23 | 4 | P08649,Q62761;Q62762;Q62763,Q63474,Q9R168        |
| 1479 | 1,2,4,5,7,1<br>9,22,23 | 3,6,8,17,1<br>8,20,21,24 | 3 | P80299,Q03191,Q9EQS0                             |
| 1480 | 1,2,4,5,7,1<br>9,22,24 | 3,6,8,17,1<br>8,20,21,23 | 1 | Q9R168                                           |
| 1481 | 1,2,4,5,7,1<br>9,23,24 | 3,6,8,17,1<br>8,20,21,22 | 1 | P14173                                           |
| 1482 | 1,2,4,5,7,2<br>0,21,22 | 3,6,8,17,1<br>8,19,23,24 | 6 | P08649,P17046,P70549,P80299,Q03191,Q9Z0J6        |
| 1483 | 1,2,4,5,7,2<br>0,21,23 | 3,6,8,17,1<br>8,19,22,24 | 6 | P08649,P10758,P23739,P70549,P80299,Q03191        |
| 1484 | 1,2,4,5,7,2<br>0,21,24 | 3,6,8,17,1<br>8,19,22,23 | 3 | P08649,P70549,Q03191                             |
| 1485 | 1,2,4,5,7,2<br>0,22,23 | 3,6,8,17,1<br>8,19,21,24 | 4 | P10758,P23739,P80299,Q03191                      |
| 1486 | 1,2,4,5,7,2<br>0,22,24 | 3,6,8,17,1<br>8,19,21,23 | 3 | Q03191,Q6P6R2,Q9Z0J6                             |
| 1487 | 1,2,4,5,7,2<br>0,23,24 | 3,6,8,17,1<br>8,19,21,22 | 5 | P08649,P10758,P23739,Q03191,Q9QYP1               |
| 1488 | 1,2,4,5,7,2<br>1,22,23 | 3,6,8,17,1<br>8,19,20,24 | 4 | P08649,P80299,Q03191,Q9R168                      |
| 1489 | 1,2,4,5,7,2<br>1,22,24 | 3,6,8,17,1<br>8,19,20,23 | 4 | P08649,P36860,Q03191,Q9R168                      |
| 1490 | 1,2,4,5,7,2<br>1,23,24 | 3,6,8,17,1<br>8,19,20,22 | 6 | O89117,P08649,P36860,Q03191,Q63474,Q9R168        |
| 1491 | 1,2,4,5,7,2<br>2,23,24 | 3,6,8,17,1<br>8,19,20,21 | 5 | P13676,Q03191,Q6P6R2,Q9EQS0,Q9R168               |



|      |                        |                          |                                                                                        |
|------|------------------------|--------------------------|----------------------------------------------------------------------------------------|
| 1492 | 1,2,4,5,8,1<br>7,18,19 | 3,6,7,20,2<br>1,22,23,24 | 1 Q66H69                                                                               |
| 1493 | 1,2,4,5,8,1<br>7,18,20 | 3,6,7,19,2<br>1,22,23,24 | 6 D4A5U3,P19223,P36375,Q10758,Q6P6Q2,Q811M5                                            |
| 1494 | 1,2,4,5,8,1<br>7,18,21 | 3,6,7,19,2<br>0,22,23,24 | 3 P22006,Q6P6Q2,Q811M5                                                                 |
| 1495 | 1,2,4,5,8,1<br>7,18,22 | 3,6,7,19,2<br>0,21,23,24 | 1 Q30KJ2                                                                               |
| 1496 | 1,2,4,5,8,1<br>7,18,23 | 3,6,7,19,2<br>0,21,22,24 | 1 Q9JJS8                                                                               |
| 1497 | 1,2,4,5,8,1<br>7,18,24 | 3,6,7,19,2<br>0,21,22,23 | 2 Q4KLZ6,Q6P6Q2                                                                        |
| 1498 | 1,2,4,5,8,1<br>7,19,20 | 3,6,7,18,2<br>1,22,23,24 | 7 D4A5U3,P19223,P36374,Q10758,Q6IMF3,Q6P6Q2,Q8CJD3                                     |
| 1499 | 1,2,4,5,8,1<br>7,19,21 | 3,6,7,18,2<br>0,22,23,24 | 5 P22006,Q66H69,Q6IFU8,Q6IMF3,Q6P6Q2                                                   |
| 1500 | 1,2,4,5,8,1<br>7,19,22 | 3,6,7,18,2<br>0,21,23,24 | 2 P97580,Q30KJ2                                                                        |
| 1501 | 1,2,4,5,8,1<br>7,19,23 | 3,6,7,18,2<br>0,21,22,24 | 1 Q8CJD3                                                                               |
| 1502 | 1,2,4,5,8,1<br>7,19,24 | 3,6,7,18,2<br>0,21,22,23 | 3 O54728,Q6IMF3,Q6P6Q2                                                                 |
| 1503 | 1,2,4,5,8,1<br>7,20,21 | 3,6,7,18,1<br>9,22,23,24 | 12 D4A5U3,P19223,P25809,P36375,P70549,P97697,Q10758,Q4FZU2,Q6IFU8,Q6IMF3,Q6P6Q2,Q811M5 |
| 1504 | 1,2,4,5,8,1<br>7,20,22 | 3,6,7,18,1<br>9,21,23,24 | 4 D4A5U3,P19223,Q6P6Q2,Q9Z0J6                                                          |
| 1505 | 1,2,4,5,8,1<br>7,20,23 | 3,6,7,18,1<br>9,21,22,24 | 7 P19132,P19223,P23739,P36376,Q10758,Q6IMF3,Q6P6Q2                                     |
| 1506 | 1,2,4,5,8,1<br>7,20,24 | 3,6,7,18,1<br>9,21,22,23 | 8 D4A5U3,P19223,Q10758,Q4FZU2,Q6IFU8,Q6IMF3,Q6P6Q2,Q811M5                              |
| 1507 | 1,2,4,5,8,1<br>7,21,22 | 3,6,7,18,1<br>9,20,23,24 | 1 Q6P6Q2                                                                               |
| 1508 | 1,2,4,5,8,1<br>7,21,23 | 3,6,7,18,1<br>9,20,22,24 | 6 P19132,P22006,Q63474,Q6IFU8,Q6IMF3,Q6P6Q2                                            |
| 1509 | 1,2,4,5,8,1<br>7,21,24 | 3,6,7,18,1<br>9,20,22,23 | 7 P19939,P36860,Q4FZU2,Q63474,Q6IFU8,Q6IMF3,Q6P6Q2                                     |
| 1510 | 1,2,4,5,8,1<br>7,22,23 | 3,6,7,18,1<br>9,20,21,24 | 2 P00507,P20760                                                                        |
| 1511 | 1,2,4,5,8,1<br>7,22,24 | 3,6,7,18,1<br>9,20,21,23 | 2 P23593,Q6P6Q2                                                                        |

|      |                        |                          |                                                                  |
|------|------------------------|--------------------------|------------------------------------------------------------------|
| 1512 | 1,2,4,5,8,1<br>7,23,24 | 3,6,7,18,1<br>9,20,21,22 | 5 P20760,Q4FZU2,Q5PQL7,Q6IMF3,Q6P6Q2                             |
| 1513 | 1,2,4,5,8,1<br>8,19,20 | 3,6,7,17,2<br>1,22,23,24 | 1 Q10758                                                         |
| 1514 | 1,2,4,5,8,1<br>8,19,21 | 3,6,7,17,2<br>0,22,23,24 | 1 Q66H69                                                         |
| 1515 | 1,2,4,5,8,1<br>8,19,22 | 3,6,7,17,2<br>0,21,23,24 | 2 P97580,Q30KJ2                                                  |
| 1516 | 1,2,4,5,8,1<br>8,19,23 | 3,6,7,17,2<br>0,21,22,24 | 1 P20762                                                         |
| 1517 | 1,2,4,5,8,1<br>8,19,24 | 3,6,7,17,2<br>0,21,22,23 | 2 O54728,Q4KLZ6                                                  |
| 1518 | 1,2,4,5,8,1<br>8,20,21 | 3,6,7,17,1<br>9,22,23,24 | 9 P25809,P36375,P70549,Q03191,Q10758,Q6IFU8,Q6P6Q2,Q811M5,Q91ZS3 |
| 1519 | 1,2,4,5,8,1<br>8,20,22 | 3,6,7,17,1<br>9,21,23,24 | 1 Q03191                                                         |
| 1520 | 1,2,4,5,8,1<br>8,20,23 | 3,6,7,17,1<br>9,21,22,24 | 4 P19132,P23739,Q03191,Q10758                                    |
| 1521 | 1,2,4,5,8,1<br>8,20,24 | 3,6,7,17,1<br>9,21,22,23 | 4 Q03191,Q10758,Q4KLZ6,Q6P6Q2                                    |
| 1522 | 1,2,4,5,8,1<br>8,21,22 | 3,6,7,17,1<br>9,20,23,24 | 1 P70549                                                         |
| 1523 | 1,2,4,5,8,1<br>8,21,23 | 3,6,7,17,1<br>9,20,22,24 | 3 O89117,P54921,P70549                                           |
| 1524 | 1,2,4,5,8,1<br>8,21,24 | 3,6,7,17,1<br>9,20,22,23 | 5 O89117,P36860,Q4KLZ6,Q6IFU8,Q6P6Q2                             |
| 1525 | 1,2,4,5,8,1<br>8,22,23 | 3,6,7,17,1<br>9,20,21,24 | 4 P20762,P54921,Q03191,Q30KJ2                                    |
| 1526 | 1,2,4,5,8,1<br>8,22,24 | 3,6,7,17,1<br>9,20,21,23 | 2 Q4KLZ6,Q6P6R2                                                  |
| 1527 | 1,2,4,5,8,1<br>8,23,24 | 3,6,7,17,1<br>9,20,21,22 | 3 P20762,Q4KLZ6,Q6P6R2                                           |
| 1528 | 1,2,4,5,8,1<br>9,20,21 | 3,6,7,17,1<br>8,22,23,24 | 9 D4A5U3,P36374,P70549,Q10758,Q5I0D1,Q66H69,Q6IFU8,Q6IMF3,Q6P6Q2 |
| 1529 | 1,2,4,5,8,1<br>9,20,22 | 3,6,7,17,1<br>8,21,23,24 | 1 P19218                                                         |
| 1530 | 1,2,4,5,8,1<br>9,20,23 | 3,6,7,17,1<br>8,21,22,24 | 3 P10758,P23739,Q8CJD3                                           |
| 1531 | 1,2,4,5,8,1<br>9,20,24 | 3,6,7,17,1<br>8,21,22,23 | 5 O54728,P36374,Q6IFU8,Q6IMF3,Q6P6Q2                             |

|      |                         |                          |                                                           |
|------|-------------------------|--------------------------|-----------------------------------------------------------|
| 1532 | 1,2,4,5,8,1<br>9,21,22  | 3,6,7,17,1<br>8,20,23,24 | 0                                                         |
| 1533 | 1,2,4,5,8,1<br>9,21,23  | 3,6,7,17,1<br>8,20,22,24 | 1 P22006                                                  |
| 1534 | 1,2,4,5,8,1<br>9,21,24  | 3,6,7,17,1<br>8,20,22,23 | 8 O54728,P07174,P30919,Q63474,Q66H69,Q6IFU8,Q6IMF3,Q6P6Q2 |
| 1535 | 1,2,4,5,8,1<br>9,22,23  | 3,6,7,17,1<br>8,20,21,24 | 1 P00507                                                  |
| 1536 | 1,2,4,5,8,1<br>9,22,24  | 3,6,7,17,1<br>8,20,21,23 | 3 O54728,P00507,P30919                                    |
| 1537 | 1,2,4,5,8,1<br>9,23,24  | 3,6,7,17,1<br>8,20,21,22 | 2 O54728,P00507                                           |
| 1538 | 1,2,4,5,8,2<br>0,21,22  | 3,6,7,17,1<br>8,19,23,24 | 4 P70549,Q03191,Q10758,Q6P6Q2                             |
| 1539 | 1,2,4,5,8,2<br>0,21,23  | 3,6,7,17,1<br>8,19,22,24 | 8 P19132,P23739,P70549,Q03191,Q10758,Q6IFU8,Q6IMF3,Q6P6Q2 |
| 1540 | 1,2,4,5,8,2<br>0,21,24  | 3,6,7,17,1<br>8,19,22,23 | 7 P70549,Q10743,Q10758,Q4FZU2,Q6IFU8,Q6IMF3,Q6P6Q2        |
| 1541 | 1,2,4,5,8,2<br>0,22,23  | 3,6,7,17,1<br>8,19,21,24 | 2 P23739,Q03191                                           |
| 1542 | 1,2,4,5,8,2<br>0,22,24  | 3,6,7,17,1<br>8,19,21,23 | 1 Q6P6Q2                                                  |
| 1543 | 1,2,4,5,8,2<br>0,23,24  | 3,6,7,17,1<br>8,19,21,22 | 7 P23739,Q03191,Q5QE79,Q6IFU8,Q6IMF3,Q6P6Q2,Q9QYP1        |
| 1544 | 1,2,4,5,8,2<br>1,22,23  | 3,6,7,17,1<br>8,19,20,24 | 2 P30919,P54921                                           |
| 1545 | 1,2,4,5,8,2<br>1,22,24  | 3,6,7,17,1<br>8,19,20,23 | 4 P30919,Q10743,Q6IMF3,Q6P6Q2                             |
| 1546 | 1,2,4,5,8,2<br>1,23,24  | 3,6,7,17,1<br>8,19,20,22 | 6 P30919,P36860,Q63474,Q6IFU8,Q6IMF3,Q6P6Q2               |
| 1547 | 1,2,4,5,8,2<br>2,23,24  | 3,6,7,17,1<br>8,19,20,21 | 4 P00507,P20760,P30919,Q6P6R2                             |
| 1548 | 1,2,4,5,17,<br>18,19,20 | 3,6,7,8,21,<br>22,23,24  | 4 P13265,P19223,P35280,Q62714                             |
| 1549 | 1,2,4,5,17,<br>18,19,21 | 3,6,7,8,20,<br>22,23,24  | 2 P22006,P35280                                           |
| 1550 | 1,2,4,5,17,<br>18,19,22 | 3,6,7,8,20,<br>21,23,24  | 0                                                         |
| 1551 | 1,2,4,5,17,<br>18,19,23 | 3,6,7,8,20,<br>21,22,24  | 1 P35280                                                  |

|      |                                              |                                                    |
|------|----------------------------------------------|----------------------------------------------------|
| 1552 | 1,2,4,5,17, 3,6,7,8,20,<br>18,19,24 21,22,23 | 3 P13265,P35280,Q4KLZ6                             |
| 1553 | 1,2,4,5,17, 3,6,7,8,19,<br>18,20,21 22,23,24 | 5 P19223,P35280,P70549,Q03191,Q811M5               |
| 1554 | 1,2,4,5,17, 3,6,7,8,19,<br>18,20,22 21,23,24 | 3 P19223,Q03191,Q9Z0J6                             |
| 1555 | 1,2,4,5,17, 3,6,7,8,19,<br>18,20,23 21,22,24 | 4 P19223,P23739,P35280,Q03191                      |
| 1556 | 1,2,4,5,17, 3,6,7,8,19,<br>18,20,24 21,22,23 | 4 P19223,P35280,Q03191,Q4KLZ6                      |
| 1557 | 1,2,4,5,17, 3,6,7,8,19,<br>18,21,22 20,23,24 | 0                                                  |
| 1558 | 1,2,4,5,17, 3,6,7,8,19,<br>18,21,23 20,22,24 | 3 P19814,P35280,Q9QZK9                             |
| 1559 | 1,2,4,5,17, 3,6,7,8,19,<br>18,21,24 20,22,23 | 4 P19939,P35280,P36860,Q4KLZ6                      |
| 1560 | 1,2,4,5,17, 3,6,7,8,19,<br>18,22,23 20,21,24 | 5 P08723,P30120,Q03191,Q63617,Q9EQS0               |
| 1561 | 1,2,4,5,17, 3,6,7,8,19,<br>18,22,24 20,21,23 | 5 D3ZUC6,Q4KLZ6,Q5RK11,Q63617,Q9WTT6               |
| 1562 | 1,2,4,5,17, 3,6,7,8,19,<br>18,23,24 20,21,22 | 3 P35280,Q4KLZ6,Q63617                             |
| 1563 | 1,2,4,5,17, 3,6,7,8,18,<br>19,20,21 22,23,24 | 2 P19223,P35280                                    |
| 1564 | 1,2,4,5,17, 3,6,7,8,18,<br>19,20,22 21,23,24 | 1 P19223                                           |
| 1565 | 1,2,4,5,17, 3,6,7,8,18,<br>19,20,23 21,22,24 | 6 P02625,P10758,P19223,P23739,P35280,Q8CJD3        |
| 1566 | 1,2,4,5,17, 3,6,7,8,18,<br>19,20,24 21,22,23 | 1 P35280                                           |
| 1567 | 1,2,4,5,17, 3,6,7,8,18,<br>19,21,22 20,23,24 | 1 Q9R168                                           |
| 1568 | 1,2,4,5,17, 3,6,7,8,18,<br>19,21,23 20,22,24 | 2 P22006,P35280                                    |
| 1569 | 1,2,4,5,17, 3,6,7,8,18,<br>19,21,24 20,22,23 | 5 P19939,P35280,Q62761;Q62762;Q62763,Q62894,Q9R168 |
| 1570 | 1,2,4,5,17, 3,6,7,8,18,<br>19,22,23 20,21,24 | 2 P00507,Q9EQS0                                    |
| 1571 | 1,2,4,5,17, 3,6,7,8,18,<br>19,22,24 20,21,23 | 3 D3ZUC6,P00507,Q9R168                             |

|      |                                              |                                                                  |
|------|----------------------------------------------|------------------------------------------------------------------|
| 1572 | 1,2,4,5,17, 3,6,7,8,18,<br>19,23,24 20,21,22 | 1 P35280                                                         |
| 1573 | 1,2,4,5,17, 3,6,7,8,18,<br>20,21,22 19,23,24 | 3 P19223,Q03191,Q9Z0J6                                           |
| 1574 | 1,2,4,5,17, 3,6,7,8,18,<br>20,21,23 19,22,24 | 4 P19223,P23739,P35280,Q03191                                    |
| 1575 | 1,2,4,5,17, 3,6,7,8,18,<br>20,21,24 19,22,23 | 2 P19223,P35280                                                  |
| 1576 | 1,2,4,5,17, 3,6,7,8,18,<br>20,22,23 19,21,24 | 2 P23739,Q03191                                                  |
| 1577 | 1,2,4,5,17, 3,6,7,8,18,<br>20,22,24 19,21,23 | 1 Q9Z0J6                                                         |
| 1578 | 1,2,4,5,17, 3,6,7,8,18,<br>20,23,24 19,21,22 | 6 P08937,P23739,P35280,Q03191,Q63751,Q9QYP1                      |
| 1579 | 1,2,4,5,17, 3,6,7,8,18,<br>21,22,23 19,20,24 | 1 Q9R168                                                         |
| 1580 | 1,2,4,5,17, 3,6,7,8,18,<br>21,22,24 19,20,23 | 2 P36860,Q9R168                                                  |
| 1581 | 1,2,4,5,17, 3,6,7,8,18,<br>21,23,24 19,20,22 | 3 P35280,P36860,Q9R168                                           |
| 1582 | 1,2,4,5,17, 3,6,7,8,18,<br>22,23,24 19,20,21 | 9 D3ZUC6,P00507,P08937,Q5RKI1,Q63617,Q6P6R2,Q9EQS0,Q9R168,Q9WTT6 |
| 1583 | 1,2,4,5,18, 3,6,7,8,17,<br>19,20,21 22,23,24 | 1 P35280                                                         |
| 1584 | 1,2,4,5,18, 3,6,7,8,17,<br>19,20,22 21,23,24 | 1 Q03191                                                         |
| 1585 | 1,2,4,5,18, 3,6,7,8,17,<br>19,20,23 21,22,24 | 4 P10758,P23739,P35280,Q03191                                    |
| 1586 | 1,2,4,5,18, 3,6,7,8,17,<br>19,20,24 21,22,23 | 2 P35280,Q4KLZ6                                                  |
| 1587 | 1,2,4,5,18, 3,6,7,8,17,<br>19,21,22 20,23,24 | 0                                                                |
| 1588 | 1,2,4,5,18, 3,6,7,8,17,<br>19,21,23 20,22,24 | 2 O70417,P35280                                                  |
| 1589 | 1,2,4,5,18, 3,6,7,8,17,<br>19,21,24 20,22,23 | 3 O70417,P35280,Q4KLZ6                                           |
| 1590 | 1,2,4,5,18, 3,6,7,8,17,<br>19,22,23 20,21,24 | 3 P00507,P13676,Q9EQS0                                           |
| 1591 | 1,2,4,5,18, 3,6,7,8,17,<br>19,22,24 20,21,23 | 5 P00507,P13676,Q4KLZ6,Q9EQS0,Q9WTT6                             |

|      |                                              |                                                                                |
|------|----------------------------------------------|--------------------------------------------------------------------------------|
| 1592 | 1,2,4,5,18, 3,6,7,8,17,<br>19,23,24 20,21,22 | 5 O70417,P13676,P35280,Q4KLZ6,Q9WTT6                                           |
| 1593 | 1,2,4,5,18, 3,6,7,8,17,<br>20,21,22 19,23,24 | 2 P70549,Q03191                                                                |
| 1594 | 1,2,4,5,18, 3,6,7,8,17,<br>20,21,23 19,22,24 | 4 P35280,P70549,Q03191,Q9QZK9                                                  |
| 1595 | 1,2,4,5,18, 3,6,7,8,17,<br>20,21,24 19,22,23 | 3 P35280,Q03191,Q4KLZ6                                                         |
| 1596 | 1,2,4,5,18, 3,6,7,8,17,<br>20,22,23 19,21,24 | 5 P04355,Q03191,Q5QE79,Q9EQS0,Q9QX74                                           |
| 1597 | 1,2,4,5,18, 3,6,7,8,17,<br>20,22,24 19,21,23 | 5 P21674,Q03191,Q4KLZ6,Q5QE79,Q9QX74                                           |
| 1598 | 1,2,4,5,18, 3,6,7,8,17,<br>20,23,24 19,21,22 | 7 P23739,P35280,Q03191,Q4KLZ6,Q5QE79,Q9QX74,Q9QYP1                             |
| 1599 | 1,2,4,5,18, 3,6,7,8,17,<br>21,22,23 19,20,24 | 5 O70417,P13676,P54921,Q03191,Q9EQS0                                           |
| 1600 | 1,2,4,5,18, 3,6,7,8,17,<br>21,22,24 19,20,23 | 3 P13676,Q4KLZ6,Q9WTT6                                                         |
| 1601 | 1,2,4,5,18, 3,6,7,8,17,<br>21,23,24 19,20,22 | 9 O70417,O89117,P13676,P35280,Q03191,Q4KLZ6,Q9JJ50,Q9QZK9,Q9WTT6               |
| 1602 | 1,2,4,5,18, 3,6,7,8,17,<br>22,23,24 19,20,21 | 11 P00507,P13676,Q03191,Q4KLZ6,Q5QE79,Q63617,Q6P6R2,Q9EQS0,Q9QX74,Q9WTT6,Q9WVK |
| 1603 | 1,2,4,5,19, 3,6,7,8,17,<br>20,21,22 18,23,24 | 7<br>0                                                                         |
| 1604 | 1,2,4,5,19, 3,6,7,8,17,<br>20,21,23 18,22,24 | 3 P10758,P23739,P35280                                                         |
| 1605 | 1,2,4,5,19, 3,6,7,8,17,<br>20,21,24 18,22,23 | 1 P35280                                                                       |
| 1606 | 1,2,4,5,19, 3,6,7,8,17,<br>20,22,23 18,21,24 | 3 P10758,P23739,Q03191                                                         |
| 1607 | 1,2,4,5,19, 3,6,7,8,17,<br>20,22,24 18,21,23 | 1 Q9QX74                                                                       |
| 1608 | 1,2,4,5,19, 3,6,7,8,17,<br>20,23,24 18,21,22 | 5 P10758,P23739,P35280,Q9QX74,Q9QYP1                                           |
| 1609 | 1,2,4,5,19, 3,6,7,8,17,<br>21,22,23 18,20,24 | 1 O70417                                                                       |
| 1610 | 1,2,4,5,19, 3,6,7,8,17,<br>21,22,24 18,20,23 | 2 P30919,Q9R168                                                                |
| 1611 | 1,2,4,5,19, 3,6,7,8,17,<br>21,23,24 18,20,22 | 4 O70417,P07174,P14173,P35280                                                  |

|      |                                                  |                                                                                            |                                                                                                                                                                                     |
|------|--------------------------------------------------|--------------------------------------------------------------------------------------------|-------------------------------------------------------------------------------------------------------------------------------------------------------------------------------------|
| 1612 | 1,2,4,5,19, 3,6,7,8,17,<br>22,23,24 18,20,21     | 7                                                                                          | P00507,P13676,P26772,Q6P6R2,Q9EQS0,Q9QX74,Q9WTT6                                                                                                                                    |
| 1613 | 1,2,4,5,20, 3,6,7,8,17,<br>21,22,23 18,19,24     | 2                                                                                          | P70549,Q03191                                                                                                                                                                       |
| 1614 | 1,2,4,5,20, 3,6,7,8,17,<br>21,22,24 18,19,23     | 1                                                                                          | Q03191                                                                                                                                                                              |
| 1615 | 1,2,4,5,20, 3,6,7,8,17,<br>21,23,24 18,19,22     | 6                                                                                          | O70417,P08649,P23739,P35280,Q03191,Q9QYP1                                                                                                                                           |
| 1616 | 1,2,4,5,20, 3,6,7,8,17,<br>22,23,24 18,19,21     | 7                                                                                          | P23739,Q03191,Q5QE79,Q63751,Q6P6R2,Q9QX74,Q9QYP1                                                                                                                                    |
| 1617 | 1,2,4,5,21, 3,6,7,8,17,<br>22,23,24 18,19,20     | 5                                                                                          | O70417,P13676,P30919,Q9R168,Q9WTT6                                                                                                                                                  |
| 1618 | 1,2,4,6,7,8 3,5,19,20,<br>,17,18 21,22,23,2<br>4 | 16                                                                                         | G3V686,O70594,P02454,P06911,P13432,P18418,P31044,P50280,P80299,P97580,Q30KJ2,Q5GR<br>G2,Q63598,Q99PP0,Q9QZQ5,Q9Z1F2                                                                 |
| 1619 | 1,2,4,6,7,8 3,5,18,20,<br>,17,19 21,22,23,2<br>4 | iRT-<br>15                                                                                 | Kit_WR_fusion,P11598,P15399,P18418,P22282,P31044,P50115,P50280,P80299,P97580,Q30KJ2,<br>Q5GRG2,Q66H69,Q99041,Q9JI85                                                                 |
| 1620 | 1,2,4,6,7,8 3,5,18,19,<br>,17,20 21,22,23,2<br>4 | Kit_WR_fusion,P02454,P02631,P02780,P05964,P06761,P06911,P11598,P12020,P15399,P17559,<br>35 | P18418,P19223,P19629,P22273,P22282,P31044,P46462,P50280,P55091,P80299,P97580,Q1075<br>8,Q30KJ2,Q4G075,Q5GRG2,Q62946,Q6P9T8,Q78P75,Q812E4,Q9JHB9,Q9JI85,Q9R0T3,Q9Z0J6<br>B1H234,iRT- |
| 1621 | 1,2,4,6,7,8 3,5,18,19,<br>,17,21 20,22,23,2<br>4 | 20                                                                                         | Kit_WR_fusion,O70594,P02631,P11598,P18418,P19629,P22282,P36860,P80299,P97580,Q00715,<br>Q30KJ2,Q5GRG2,Q63474,Q63493,Q63598,Q78P75,Q9JI85,Q9Z1F2                                     |
| 1622 | 1,2,4,6,7,8 3,5,18,19,<br>,17,22 20,21,23,2<br>4 | iRT-<br>12                                                                                 | Kit_WR_fusion,O54858,P06911,P15399,P19629,P23593,P80299,P97580,Q30KJ2,Q5GRG2,Q9904<br>1,Q9Z1F2                                                                                      |
| 1623 | 1,2,4,6,7,8 3,5,18,19,<br>,17,23 20,21,22,2<br>4 | iRT-<br>12                                                                                 | Kit_WR_fusion,O54858,O70594,P18418,P19629,P20761,P80299,P97580,Q30KJ2,Q63474,Q6353<br>2,Q63598                                                                                      |
| 1624 | 1,2,4,6,7,8 3,5,18,19,<br>,17,24 20,21,22,2<br>3 | P01039,P06911,P07379,P18418,P23593,P36860,P97580,Q30KJ2,Q5GRG2,Q63474,Q63598,Q9J<br>13     | HB9,Q9Z1F2                                                                                                                                                                          |
| 1625 | 1,2,4,6,7,8 3,5,17,20,<br>,18,19 21,22,23,2<br>4 | iRT-<br>19                                                                                 | Kit_WR_fusion,O55004,P06761,P11598,P11762,P15399,P18418,P19629,P22282,P31044,P50280,<br>P80299,P97580,Q30KJ2,Q5GRG2,Q66H69,Q91ZS3,Q99041,Q9JI85                                     |

|      |                       |                               |                                                                                                                                                                                                                                                                                                                                                                                   |
|------|-----------------------|-------------------------------|-----------------------------------------------------------------------------------------------------------------------------------------------------------------------------------------------------------------------------------------------------------------------------------------------------------------------------------------------------------------------------------|
| 1626 | 1,2,4,6,7,8<br>,18,20 | 3,5,17,19,<br>21,22,23,2<br>4 | D4A5U3,iRT-<br>Kit_WR_fusion,O55004,P02454,P02631,P02780,P05964,P06761,P06911,P11598,P12020,P15399,<br>35 P18418,P19629,P22273,P22282,P22283,P31044,P50280,P69897,P80299,P97580,Q30KJ2,Q4G07<br>5,Q5GRG2,Q63617,Q6P9T8,Q6RY07,Q78P75,Q80WL1,Q91ZS3,Q99041,Q9JHB9,Q9JI85,Q9QW0<br>7                                                                                                |
| 1627 | 1,2,4,6,7,8<br>,18,21 | 3,5,17,19,<br>20,22,23,2<br>4 | B1H234,iRT-<br>19 Kit_WR_fusion,O55004,P02631,P11598,P18418,P19629,P22282,P36860,P50280,P80299,P97580,<br>Q00715,Q30KJ2,Q63474,Q91ZS3,Q99041,Q9JI85,Q9Z1F2                                                                                                                                                                                                                        |
| 1628 | 1,2,4,6,7,8<br>,18,22 | 3,5,17,19,<br>20,21,23,2<br>4 | 13 O54858,P15399,P18418,P19629,P20762,P23593,P50280,P80299,P97580,Q30KJ2,Q91ZS3,Q990<br>41,Q9Z1F2                                                                                                                                                                                                                                                                                 |
| 1629 | 1,2,4,6,7,8<br>,18,23 | 3,5,17,19,<br>20,21,22,2<br>4 | 15 O54858,O70594,P18418,P19629,P20761,P20762,P50280,P54921,P80299,P97580,Q30KJ2,Q3ZA<br>V1,Q63532,Q63598,Q91ZS3                                                                                                                                                                                                                                                                   |
| 1630 | 1,2,4,6,7,8<br>,18,24 | 3,5,17,19,<br>20,21,22,2<br>3 | 12 O55004,P07151,P18418,P20762,P50280,P97580,Q30KJ2,Q3ZAV1,Q63598,Q91ZS3,Q9JHB9,Q9Z<br>1F2                                                                                                                                                                                                                                                                                        |
| 1631 | 1,2,4,6,7,8<br>,19,20 | 3,5,17,18,<br>21,22,23,2<br>4 | D4A5U3,iRT-<br>Kit_WR_fusion,P00714,P02631,P02780,P05964,P06761,P06911,P08723,P0C0A9,P10758,P11598,<br>43 P11762,P12020,P15399,P18418,P19629,P22273,P22282,P22283,P31044,P36374,P42854,P46462<br>,P50280,P80299,P97580,Q30KJ2,Q4G075,Q5GRG2,Q63493,Q63617,Q66H69,Q68G31,Q6P9T8,<br>Q78P75,Q812E4,Q99041,Q9JHB9,Q9JI85,Q9QW07,Q9QZK8,Q9R0T3                                        |
| 1632 | 1,2,4,6,7,8<br>,19,21 | 3,5,17,18,<br>20,22,23,2<br>4 | B1H234,iRT-<br>25 Kit_WR_fusion,P00714,P02631,P06761,P0C0A9,P11598,P15399,P18418,P19629,P22282,P22283,<br>P35952,P50280,P80299,P97580,Q00715,Q30KJ2,Q63474,Q63493,Q63617,Q66H69,Q6Q7Y5,Q9<br>9041,Q9JI85                                                                                                                                                                          |
| 1633 | 1,2,4,6,7,8<br>,19,22 | 3,5,17,18,<br>20,21,23,2<br>4 | iRT-<br>15 Kit_WR_fusion,O54858,P11762,P15399,P19629,P22282,P42854,P50280,P80299,P97580,Q30KJ2,<br>Q4FZU4,Q66H69,Q99041,Q9JI85                                                                                                                                                                                                                                                    |
| 1634 | 1,2,4,6,7,8<br>,19,23 | 3,5,17,18,<br>20,21,22,2<br>4 | iRT-<br>16 Kit_WR_fusion,O54858,P15399,P18418,P19629,P20761,P22282,P42854,P50280,P80299,P97580,<br>Q30KJ2,Q63532,Q66H69,Q99041,Q9JI85                                                                                                                                                                                                                                             |
| 1635 | 1,2,4,6,7,8<br>,19,24 | 3,5,17,18,<br>20,21,22,2<br>3 | iRT-<br>20 Kit_WR_fusion,O54728,P00714,P07151,P08723,P0C0A9,P11598,P11762,P15399,P18418,P22282,<br>P50280,P80299,P97580,Q30KJ2,Q63474,Q66H69,Q68G31,Q99041,Q9JI85                                                                                                                                                                                                                 |
| 1636 | 1,2,4,6,7,8<br>,20,21 | 3,5,17,18,<br>19,22,23,2<br>4 | B1H234,D4A5U3,iRT-<br>Kit_WR_fusion,P00714,P02631,P02780,P02781,P05964,P06761,P06911,P07647,P08723,P0C0A9,<br>48 P11598,P12020,P15399,P16228,P18418,P19629,P22273,P22282,P22283,P31044,P35952,P46462<br>,P50280,P69897,P80299,Q00715,Q10758,Q30KJ2,Q4G075,Q5GRG2,Q5M8C6,Q62946,Q63474,<br>Q63493,Q63617,Q6AYR9,Q78P75,Q812E4,Q8CJ52,Q91ZS3,Q99041,Q9JHB9,Q9JI85,Q9QW07,<br>Q9R0T3 |



|      |                        |                               |    |                                                                                                                                                                                                                                                 |
|------|------------------------|-------------------------------|----|-------------------------------------------------------------------------------------------------------------------------------------------------------------------------------------------------------------------------------------------------|
| 1637 | 1,2,4,6,7,8<br>,20,22  | 3,5,17,18,<br>19,21,23,2<br>4 | 26 | D4A5U3,iRT-<br>Kit_WR_fusion,P02780,P06911,P11598,P12020,P15399,P19629,P22273,P22282,P23593,P31044,<br>P42854,P50280,P80299,P97580,Q30KJ2,Q4G075,Q5GRG2,Q6P9T8,Q78P75,Q91ZS3,Q99041,Q9<br>JHB9,Q9JI85,Q9QW07                                    |
| 1638 | 1,2,4,6,7,8<br>,20,23  | 3,5,17,18,<br>19,21,22,2<br>4 | 26 | D4A5U3,iRT-<br>Kit_WR_fusion,P02780,P06911,P10758,P11598,P12020,P15399,P17559,P18418,P19629,P22273,<br>P22282,P31044,P42854,P50280,P80299,Q30KJ2,Q4G075,Q5GRG2,Q63532,Q78P75,Q812E4,Q9<br>1ZS3,Q9JHB9,Q9JI85                                    |
| 1639 | 1,2,4,6,7,8<br>,20,24  | 3,5,17,18,<br>19,21,22,2<br>3 | 31 | D4A5U3,iRT-<br>Kit_WR_fusion,P00714,P02780,P02781,P06761,P06911,P08723,P09456,P11598,P12020,P15399,<br>P18418,P19629,P22273,P22282,P22283,P31044,P46462,P50280,P80299,Q30KJ2,Q4G075,Q5GR<br>G2,Q63617,Q78P75,Q812E4,Q91ZS3,Q9JHB9,Q9JI85,Q9QW07 |
| 1640 | 1,2,4,6,7,8<br>,21,22  | 3,5,17,18,<br>19,20,23,2<br>4 | 17 | B1H234,iRT-<br>Kit_WR_fusion,O54858,P02631,P11598,P15399,P19629,P23593,P50280,P80299,P97580,Q30KJ2,<br>Q63474,Q91ZS3,Q99041,Q9JI85,Q9Z1F2                                                                                                       |
| 1641 | 1,2,4,6,7,8<br>,21,23  | 3,5,17,18,<br>19,20,22,2<br>4 | 13 | iRT-<br>Kit_WR_fusion,O54858,P02631,P11598,P18418,P19629,P20761,P36860,P80299,Q30KJ2,Q63474,<br>Q63532,Q63598                                                                                                                                   |
| 1642 | 1,2,4,6,7,8<br>,21,24  | 3,5,17,18,<br>19,20,22,2<br>3 | 19 | B1H234,iRT-<br>Kit_WR_fusion,P00714,P02631,P02782,P11598,P16228,P18418,P19629,P22282,P36860,Q30KJ2,<br>Q63474,Q63598,Q6AYR9,Q91ZS3,Q9JHB9,Q9JI85,Q9Z1F2                                                                                         |
| 1643 | 1,2,4,6,7,8<br>,22,23  | 3,5,17,18,<br>19,20,21,2<br>4 | 13 | iRT-<br>Kit_WR_fusion,O54858,P15399,P19629,P20761,P20762,P23593,P42854,P80299,P97580,Q30KJ2,<br>Q63532,Q99041                                                                                                                                   |
| 1644 | 1,2,4,6,7,8<br>,22,24  | 3,5,17,18,<br>19,20,21,2<br>3 | 11 | iRT-<br>Kit_WR_fusion,O54858,P15399,P23593,P50280,P80299,P97580,Q30KJ2,Q6P6R2,Q99041,Q9Z1F<br>2                                                                                                                                                 |
| 1645 | 1,2,4,6,7,8<br>,23,24  | 3,5,17,18,<br>19,20,21,2<br>2 | 12 | iRT-<br>Kit_WR_fusion,O54858,P18418,P19629,P20761,P80299,Q30KJ2,Q3ZAV1,Q63474,Q63532,Q635<br>98,Q6P6R2                                                                                                                                          |
| 1646 | 1,2,4,6,7,1<br>7,18,19 | 3,5,8,20,2<br>1,22,23,24      | 3  | B1H234,G3V686,P80299                                                                                                                                                                                                                            |
| 1647 | 1,2,4,6,7,1<br>7,18,20 | 3,5,8,19,2<br>1,22,23,24      | 8  | G3V686,P11598,P19223,P55091,P80299,Q5GRG2,Q80WL1,Q9Z0J6                                                                                                                                                                                         |
| 1648 | 1,2,4,6,7,1<br>7,18,21 | 3,5,8,19,2<br>0,22,23,24      | 5  | B1H234,P36860,P80299,Q9WVH8,Q9Z1F2                                                                                                                                                                                                              |
| 1649 | 1,2,4,6,7,1<br>7,18,22 | 3,5,8,19,2<br>0,21,23,24      | 4  | D3ZUC6,P80299,Q9EQS0,Q9Z1F2                                                                                                                                                                                                                     |
| 1650 | 1,2,4,6,7,1<br>7,18,23 | 3,5,8,19,2<br>0,21,22,24      | 2  | P80299,Q9EQS0                                                                                                                                                                                                                                   |

|      |                        |                          |    |                                                                                     |
|------|------------------------|--------------------------|----|-------------------------------------------------------------------------------------|
| 1651 | 1,2,4,6,7,1<br>7,18,24 | 3,5,8,19,2<br>0,21,22,23 | 5  | B1H234,D3ZUC6,P01039,P80299,Q9Z1F2                                                  |
| 1652 | 1,2,4,6,7,1<br>7,19,20 | 3,5,8,18,2<br>1,22,23,24 | 9  | P11598,P19223,P36374,P55091,P80299,Q5GRG2,Q63617,Q9JI85,Q9R0T3                      |
| 1653 | 1,2,4,6,7,1<br>7,19,21 | 3,5,8,18,2<br>0,22,23,24 | 6  | B1H234,P05539,P11598,P80299,Q63474,Q9R168                                           |
| 1654 | 1,2,4,6,7,1<br>7,19,22 | 3,5,8,18,2<br>0,21,23,24 | 3  | D3ZUC6,P80299,Q9R168                                                                |
| 1655 | 1,2,4,6,7,1<br>7,19,23 | 3,5,8,18,2<br>0,21,22,24 | 2  | P80299,Q9R168                                                                       |
| 1656 | 1,2,4,6,7,1<br>7,19,24 | 3,5,8,18,2<br>0,21,22,23 | 5  | B1H234,D3ZUC6,P01039,P80299,Q9R168                                                  |
| 1657 | 1,2,4,6,7,1<br>7,20,21 | 3,5,8,18,1<br>9,22,23,24 | 12 | B1H234,P05964,P07647,P11598,P19223,P19629,P22283,P55091,P80299,Q5GRG2,Q63617,Q9Z0J6 |
| 1658 | 1,2,4,6,7,1<br>7,20,22 | 3,5,8,18,1<br>9,21,23,24 | 5  | P19223,P55091,P80299,Q5GRG2,Q9Z0J6                                                  |
| 1659 | 1,2,4,6,7,1<br>7,20,23 | 3,5,8,18,1<br>9,21,22,24 | 8  | P10758,P11598,P19223,P55091,P80299,Q5GRG2,Q63467,Q9QYP1                             |
| 1660 | 1,2,4,6,7,1<br>7,20,24 | 3,5,8,18,1<br>9,21,22,23 | 8  | P01039,P11598,P19223,P80299,Q5GRG2,Q9JHB9,Q9QYP1,Q9Z0J6                             |
| 1661 | 1,2,4,6,7,1<br>7,21,22 | 3,5,8,18,1<br>9,20,23,24 | 5  | B1H234,P36860,P80299,Q9R168,Q9Z1F2                                                  |
| 1662 | 1,2,4,6,7,1<br>7,21,23 | 3,5,8,18,1<br>9,20,22,24 | 5  | B1H234,P36860,P80299,Q63474,Q9R168                                                  |
| 1663 | 1,2,4,6,7,1<br>7,21,24 | 3,5,8,18,1<br>9,20,22,23 | 8  | B1H234,P01039,P36860,P80299,Q63474,Q6AY61,Q9R168,Q9Z1F2                             |
| 1664 | 1,2,4,6,7,1<br>7,22,23 | 3,5,8,18,1<br>9,20,21,24 | 4  | D3ZUC6,P80299,Q9EQS0,Q9R168                                                         |
| 1665 | 1,2,4,6,7,1<br>7,22,24 | 3,5,8,18,1<br>9,20,21,23 | 4  | D3ZUC6,P01039,P80299,Q9R168                                                         |
| 1666 | 1,2,4,6,7,1<br>7,23,24 | 3,5,8,18,1<br>9,20,21,22 | 6  | D3ZUC6,P01039,P36860,P80299,Q63598,Q9R168                                           |
| 1667 | 1,2,4,6,7,1<br>8,19,20 | 3,5,8,17,2<br>1,22,23,24 | 7  | B1H234,P11598,P22283,P80299,Q5GRG2,Q63617,Q80WL1                                    |
| 1668 | 1,2,4,6,7,1<br>8,19,21 | 3,5,8,17,2<br>0,22,23,24 | 3  | B1H234,P11598,P80299                                                                |
| 1669 | 1,2,4,6,7,1<br>8,19,22 | 3,5,8,17,2<br>0,21,23,24 | 4  | B1H234,P80299,Q80WL1,Q9EQS0                                                         |
| 1670 | 1,2,4,6,7,1<br>8,19,23 | 3,5,8,17,2<br>0,21,22,24 | 2  | P80299,Q9EQS0                                                                       |

|      |                        |                          |    |                                                                                                                               |
|------|------------------------|--------------------------|----|-------------------------------------------------------------------------------------------------------------------------------|
| 1671 | 1,2,4,6,7,1<br>8,19,24 | 3,5,8,17,2<br>0,21,22,23 | 3  | B1H234,P80299,Q5M872                                                                                                          |
| 1672 | 1,2,4,6,7,1<br>8,20,21 | 3,5,8,17,1<br>9,22,23,24 | 13 | B1H234,O55145,P01835,P02631,P07647,P11598,P19629,P22283,P80299,Q5GRG2,Q63617,Q80WL1,Q91ZS3                                    |
| 1673 | 1,2,4,6,7,1<br>8,20,22 | 3,5,8,17,1<br>9,21,23,24 | 5  | P11598,P80299,Q5GRG2,Q80WL1,Q9Z0J6                                                                                            |
| 1674 | 1,2,4,6,7,1<br>8,20,23 | 3,5,8,17,1<br>9,21,22,24 | 7  | P10758,P11598,P19629,P80299,Q5GRG2,Q80WL1,Q9QYP1                                                                              |
| 1675 | 1,2,4,6,7,1<br>8,20,24 | 3,5,8,17,1<br>9,21,22,23 | 6  | B1H234,P11598,P80299,Q5GRG2,Q9JHB9,Q9QYP1                                                                                     |
| 1676 | 1,2,4,6,7,1<br>8,21,22 | 3,5,8,17,1<br>9,20,23,24 | 5  | B1H234,P01835,P23739,P80299,Q9Z1F2                                                                                            |
| 1677 | 1,2,4,6,7,1<br>8,21,23 | 3,5,8,17,1<br>9,20,22,24 | 4  | B1H234,O89117,P01835,P80299                                                                                                   |
| 1678 | 1,2,4,6,7,1<br>8,21,24 | 3,5,8,17,1<br>9,20,22,23 | 7  | B1H234,O89117,P01835,P36376,P36860,P80299,Q9Z1F2                                                                              |
| 1679 | 1,2,4,6,7,1<br>8,22,23 | 3,5,8,17,1<br>9,20,21,24 | 6  | P13676,P54921,P80299,Q63532,Q6P6R2,Q9EQS0                                                                                     |
| 1680 | 1,2,4,6,7,1<br>8,22,24 | 3,5,8,17,1<br>9,20,21,23 | 8  | B1H234,D3ZUC6,P06760,P13676,P22006,P80299,Q6P6R2,Q9EQS0                                                                       |
| 1681 | 1,2,4,6,7,1<br>8,23,24 | 3,5,8,17,1<br>9,20,21,22 | 4  | P06760,P80299,Q6P6R2,Q9EQS0                                                                                                   |
| 1682 | 1,2,4,6,7,1<br>9,20,21 | 3,5,8,17,1<br>8,22,23,24 | 18 | B1H234,O35547,P00714,P02780,P05369,P05964,P07647,P0C0A9,P11598,P19629,P22283,P36374,P80299,Q5GRG2,Q63617,Q8CJ52,Q9JI85,Q9R0T3 |
| 1683 | 1,2,4,6,7,1<br>9,20,22 | 3,5,8,17,1<br>8,21,23,24 | 5  | P11598,P80299,Q5GRG2,Q63617,Q80WL1                                                                                            |
| 1684 | 1,2,4,6,7,1<br>9,20,23 | 3,5,8,17,1<br>8,21,22,24 | 6  | P10758,P11598,P19629,P42854,P80299,Q63617                                                                                     |
| 1685 | 1,2,4,6,7,1<br>9,20,24 | 3,5,8,17,1<br>8,21,22,23 | 9  | B1H234,P08723,P11598,P22283,P36374,P80299,Q5GRG2,Q63617,Q68G31                                                                |
| 1686 | 1,2,4,6,7,1<br>9,21,22 | 3,5,8,17,1<br>8,20,23,24 | 3  | B1H234,P80299,Q9R168                                                                                                          |
| 1687 | 1,2,4,6,7,1<br>9,21,23 | 3,5,8,17,1<br>8,20,22,24 | 3  | B1H234,P80299,Q63474                                                                                                          |
| 1688 | 1,2,4,6,7,1<br>9,21,24 | 3,5,8,17,1<br>8,20,22,23 | 8  | B1H234,P00714,P11598,P80299,Q5M872,Q62761;Q62762;Q62763,Q63474,Q9R168                                                         |
| 1689 | 1,2,4,6,7,1<br>9,22,23 | 3,5,8,17,1<br>8,20,21,24 | 5  | P42854,P80299,Q811M5,Q9EQS0,Q9R168                                                                                            |
| 1690 | 1,2,4,6,7,1<br>9,22,24 | 3,5,8,17,1<br>8,20,21,23 | 5  | B1H234,D3ZUC6,P22006,P80299,Q9R168                                                                                            |

|      |                        |                          |    |                                                                                                                        |
|------|------------------------|--------------------------|----|------------------------------------------------------------------------------------------------------------------------|
| 1691 | 1,2,4,6,7,1<br>9,23,24 | 3,5,8,17,1<br>8,20,21,22 | 1  | P80299                                                                                                                 |
| 1692 | 1,2,4,6,7,2<br>0,21,22 | 3,5,8,17,1<br>8,19,23,24 | 9  | B1H234,O55145,P01835,P11598,P17046,P19629,P80299,Q5GRG2,Q63617                                                         |
| 1693 | 1,2,4,6,7,2<br>0,21,23 | 3,5,8,17,1<br>8,19,22,24 | 6  | B1H234,P01835,P10758,P11598,P19629,P80299                                                                              |
| 1694 | 1,2,4,6,7,2<br>0,21,24 | 3,5,8,17,1<br>8,19,22,23 | 13 | B1H234,P01835,P07647,P11598,P19629,P22283,P80299,Q5GRG2,Q63474,Q63617,Q8CJ52,Q9JHB9,Q9QYP1                             |
| 1695 | 1,2,4,6,7,2<br>0,22,23 | 3,5,8,17,1<br>8,19,21,24 | 4  | P10758,P19629,P80299,Q9EQS0                                                                                            |
| 1696 | 1,2,4,6,7,2<br>0,22,24 | 3,5,8,17,1<br>8,19,21,23 | 5  | P01835,P11598,P22006,P80299,Q5GRG2                                                                                     |
| 1697 | 1,2,4,6,7,2<br>0,23,24 | 3,5,8,17,1<br>8,19,21,22 | 5  | P01835,P10758,P11598,P80299,Q9QYP1                                                                                     |
| 1698 | 1,2,4,6,7,2<br>1,22,23 | 3,5,8,17,1<br>8,19,20,24 | 6  | B1H234,P01835,P80299,Q63532,Q9EQS0,Q9R168                                                                              |
| 1699 | 1,2,4,6,7,2<br>1,22,24 | 3,5,8,17,1<br>8,19,20,23 | 6  | B1H234,P01835,P36860,P80299,Q63474,Q9R168                                                                              |
| 1700 | 1,2,4,6,7,2<br>1,23,24 | 3,5,8,17,1<br>8,19,20,22 | 6  | B1H234,P01835,P36860,P80299,Q63474,Q9R168                                                                              |
| 1701 | 1,2,4,6,7,2<br>2,23,24 | 3,5,8,17,1<br>8,19,20,21 | 10 | D3ZUC6,P06760,P13676,P22006,P80299,Q63532,Q6P6R2,Q9EQS0,Q9QX74,Q9R168                                                  |
| 1702 | 1,2,4,6,8,1<br>7,18,19 | 3,5,7,20,2<br>1,22,23,24 | 10 | G3V686,P08649,P13432,P15399,P18418,P97580,Q30KJ2,Q66H69,Q68G31,Q9JI85                                                  |
| 1703 | 1,2,4,6,8,1<br>7,18,20 | 3,5,7,19,2<br>1,22,23,24 | 17 | D4A5U3,G3V686,P06911,P08649,P12020,P13432,P15399,P17559,P18418,P19223,P50280,P55091,P97580,Q10758,Q30KJ2,Q5GRG2,Q9JI85 |
| 1704 | 1,2,4,6,8,1<br>7,18,21 | 3,5,7,19,2<br>0,22,23,24 | 5  | P02631,P13432,P18418,P97580,Q30KJ2                                                                                     |
| 1705 | 1,2,4,6,8,1<br>7,18,22 | 3,5,7,19,2<br>0,21,23,24 | 8  | D3ZUC6,G3V686,P08649,P13432,P15399,P23593,P97580,Q30KJ2                                                                |
| 1706 | 1,2,4,6,8,1<br>7,18,23 | 3,5,7,19,2<br>0,21,22,24 | 4  | P08649,P97580,Q30KJ2,Q63532                                                                                            |
| 1707 | 1,2,4,6,8,1<br>7,18,24 | 3,5,7,19,2<br>0,21,22,23 | 5  | P08649,P13432,P18418,P97580,Q30KJ2                                                                                     |
| 1708 | 1,2,4,6,8,1<br>7,19,20 | 3,5,7,18,2<br>1,22,23,24 | 15 | D4A5U3,O89117,P06911,P12020,P15399,P19223,P36374,P50280,P55091,P97580,Q10758,Q30KJ2,Q5GRG2,Q68G31,Q9JI85               |
| 1709 | 1,2,4,6,8,1<br>7,19,21 | 3,5,7,18,2<br>0,22,23,24 | 8  | P02631,P15399,P97580,Q30KJ2,Q63474,Q66H69,Q68G31,Q9JI85                                                                |
| 1710 | 1,2,4,6,8,1<br>7,19,22 | 3,5,7,18,2<br>0,21,23,24 | 5  | O89117,P00507,P15399,P97580,Q30KJ2                                                                                     |

|      |                        |                          |    |                                                                                                                 |
|------|------------------------|--------------------------|----|-----------------------------------------------------------------------------------------------------------------|
| 1711 | 1,2,4,6,8,1<br>7,19,23 | 3,5,7,18,2<br>0,21,22,24 | 4  | P15399,P97580,Q30KJ2,Q63532                                                                                     |
| 1712 | 1,2,4,6,8,1<br>7,19,24 | 3,5,7,18,2<br>0,21,22,23 | 8  | O54728,P15399,P97580,P97840,Q30KJ2,Q63474,Q68G31,Q9JI85                                                         |
| 1713 | 1,2,4,6,8,1<br>7,20,21 | 3,5,7,18,1<br>9,22,23,24 | 16 | D4A5U3,P02631,P06911,P12020,P15399,P17559,P19223,P19629,P25809,P50280,P55091,P63029,Q10758,Q30KJ2,Q5GRG2,Q9JI85 |
| 1714 | 1,2,4,6,8,1<br>7,20,22 | 3,5,7,18,1<br>9,21,23,24 | 11 | D4A5U3,O89117,P06911,P12020,P15399,P19223,P50280,P55091,P97580,Q30KJ2,Q5GRG2                                    |
| 1715 | 1,2,4,6,8,1<br>7,20,23 | 3,5,7,18,1<br>9,21,22,24 | 12 | D4A5U3,P06911,P12020,P15399,P17559,P19223,P19629,P50280,P55091,Q10758,Q30KJ2,Q5GRG2                             |
| 1716 | 1,2,4,6,8,1<br>7,20,24 | 3,5,7,18,1<br>9,21,22,23 | 12 | D4A5U3,P06911,P12020,P15399,P19223,P50280,Q10758,Q30KJ2,Q5GRG2,Q68G31,Q9JHB9,Q9JI85                             |
| 1717 | 1,2,4,6,8,1<br>7,21,22 | 3,5,7,18,1<br>9,20,23,24 | 3  | P15399,P97580,Q30KJ2                                                                                            |
| 1718 | 1,2,4,6,8,1<br>7,21,23 | 3,5,7,18,1<br>9,20,22,24 | 3  | Q30KJ2,Q63474,Q63532                                                                                            |
| 1719 | 1,2,4,6,8,1<br>7,21,24 | 3,5,7,18,1<br>9,20,22,23 | 4  | P36860,Q30KJ2,Q63474,Q6AYR9                                                                                     |
| 1720 | 1,2,4,6,8,1<br>7,22,23 | 3,5,7,18,1<br>9,20,21,24 | 9  | D3ZUC6,P00507,P15399,P23593,P47967,P97580,P97840,Q30KJ2,Q63532                                                  |
| 1721 | 1,2,4,6,8,1<br>7,22,24 | 3,5,7,18,1<br>9,20,21,23 | 7  | D3ZUC6,P15399,P23593,P47967,P97580,P97840,Q30KJ2                                                                |
| 1722 | 1,2,4,6,8,1<br>7,23,24 | 3,5,7,18,1<br>9,20,21,22 | 6  | D3ZUC6,P47967,P97840,Q30KJ2,Q63474,Q63532                                                                       |
| 1723 | 1,2,4,6,8,1<br>8,19,20 | 3,5,7,17,2<br>1,22,23,24 | 15 | P02780,P06911,P12020,P15399,P18418,P19629,P22282,P36374,P50280,P97580,Q30KJ2,Q5GRG2,Q68G31,Q6P9T8,Q9JI85        |
| 1724 | 1,2,4,6,8,1<br>8,19,21 | 3,5,7,17,2<br>0,22,23,24 | 7  | P02631,P15399,P97580,Q30KJ2,Q66H69,Q68G31,Q9JI85                                                                |
| 1725 | 1,2,4,6,8,1<br>8,19,22 | 3,5,7,17,2<br>0,21,23,24 | 5  | P00507,P15399,P50280,P97580,Q30KJ2                                                                              |
| 1726 | 1,2,4,6,8,1<br>8,19,23 | 3,5,7,17,2<br>0,21,22,24 | 4  | P15399,P97580,Q30KJ2,Q63532                                                                                     |
| 1727 | 1,2,4,6,8,1<br>8,19,24 | 3,5,7,17,2<br>0,21,22,23 | 6  | O54728,P15399,P18418,P97580,Q30KJ2,Q68G31                                                                       |
| 1728 | 1,2,4,6,8,1<br>8,20,21 | 3,5,7,17,1<br>9,22,23,24 | 16 | O55145,P02631,P06911,P12020,P15399,P18418,P19629,P25809,P50280,P54921,Q10758,Q30KJ2,Q5GRG2,Q68G31,Q91ZS3,Q9JI85 |
| 1729 | 1,2,4,6,8,1<br>8,20,22 | 3,5,7,17,1<br>9,21,23,24 | 11 | P06911,P12020,P15399,P19629,P50280,P54921,P97580,Q30KJ2,Q5GRG2,Q6AY61,Q91ZS3                                    |
| 1730 | 1,2,4,6,8,1<br>8,20,23 | 3,5,7,17,1<br>9,21,22,24 | 12 | P06911,P12020,P15399,P17559,P19629,P50280,P54921,Q10758,Q30KJ2,Q5GRG2,Q63532,Q91ZS3                             |

|      |                        |                          |    |                                                                                                                                                                         |
|------|------------------------|--------------------------|----|-------------------------------------------------------------------------------------------------------------------------------------------------------------------------|
| 1731 | 1,2,4,6,8,1<br>8,20,24 | 3,5,7,17,1<br>9,21,22,23 | 12 | P06911,P12020,P15399,P18418,P50280,Q30KJ2,Q5GRG2,Q68G31,Q91ZS3,Q9JHB9,Q9JI85,Q9QW07                                                                                     |
| 1732 | 1,2,4,6,8,1<br>8,21,22 | 3,5,7,17,1<br>9,20,23,24 | 5  | P15399,P54921,P97580,Q30KJ2,Q91ZS3                                                                                                                                      |
| 1733 | 1,2,4,6,8,1<br>8,21,23 | 3,5,7,17,1<br>9,20,22,24 | 4  | P02631,P54921,Q30KJ2,Q63532                                                                                                                                             |
| 1734 | 1,2,4,6,8,1<br>8,21,24 | 3,5,7,17,1<br>9,20,22,23 | 6  | P02631,P18418,Q30KJ2,Q63474,Q68G31,Q91ZS3                                                                                                                               |
| 1735 | 1,2,4,6,8,1<br>8,22,23 | 3,5,7,17,1<br>9,20,21,24 | 10 | O54858,P00507,P15399,P20762,P54921,P97580,Q30KJ2,Q63532,Q6AY61,Q99MH3                                                                                                   |
| 1736 | 1,2,4,6,8,1<br>8,22,24 | 3,5,7,17,1<br>9,20,21,23 | 6  | D3ZUC6,P15399,P22006,P23593,P97580,Q30KJ2                                                                                                                               |
| 1737 | 1,2,4,6,8,1<br>8,23,24 | 3,5,7,17,1<br>9,20,21,22 | 3  | P20762,Q30KJ2,Q63532                                                                                                                                                    |
| 1738 | 1,2,4,6,8,1<br>9,20,21 | 3,5,7,17,1<br>8,22,23,24 | 24 | D4A5U3,O35547,P02631,P02780,P04905,P05369,P06911,P07647,P12020,P15399,P19629,P22282,P22283,P35952,P36374,P46462,P50280,Q10758,Q30KJ2,Q5GRG2,Q63493,Q68G31,Q812E4,Q9JI85 |
| 1739 | 1,2,4,6,8,1<br>9,20,22 | 3,5,7,17,1<br>8,21,23,24 | 12 | P06911,P12020,P15399,P19629,P42854,P50280,P97580,Q30KJ2,Q5GRG2,Q68G31,Q6P9T8,Q9JI85                                                                                     |
| 1740 | 1,2,4,6,8,1<br>9,20,23 | 3,5,7,17,1<br>8,21,22,24 | 11 | P06911,P10758,P12020,P15399,P19629,P42854,P50280,Q30KJ2,Q5GRG2,Q68G31,Q9JI85                                                                                            |
| 1741 | 1,2,4,6,8,1<br>9,20,24 | 3,5,7,17,1<br>8,21,22,23 | 16 | O35547,O54728,P06911,P08723,P12020,P15399,P22282,P36374,P50280,P60905,Q30KJ2,Q5GRG2,Q68G31,Q812E4,Q9JI85,Q9QW07                                                         |
| 1742 | 1,2,4,6,8,1<br>9,21,22 | 3,5,7,17,1<br>8,20,23,24 | 6  | O54861,P15399,P30919,P97580,Q30KJ2,Q9JI85                                                                                                                               |
| 1743 | 1,2,4,6,8,1<br>9,21,23 | 3,5,7,17,1<br>8,20,22,24 | 6  | O54861,P42854,Q30KJ2,Q63474,Q63532,Q9JI85                                                                                                                               |
| 1744 | 1,2,4,6,8,1<br>9,21,24 | 3,5,7,17,1<br>8,20,22,23 | 9  | O54728,P07174,P15399,P30919,Q10743,Q30KJ2,Q63474,Q68G31,Q9JI85                                                                                                          |
| 1745 | 1,2,4,6,8,1<br>9,22,23 | 3,5,7,17,1<br>8,20,21,24 | 9  | O54861,P00507,P15399,P42854,P97580,Q30KJ2,Q63532,Q6AY61,Q811M5                                                                                                          |
| 1746 | 1,2,4,6,8,1<br>9,22,24 | 3,5,7,17,1<br>8,20,21,23 | 8  | D3ZUC6,O54728,P00507,P15399,P30919,P97580,Q30KJ2,Q68G31                                                                                                                 |
| 1747 | 1,2,4,6,8,1<br>9,23,24 | 3,5,7,17,1<br>8,20,21,22 | 7  | O54728,P00507,P15399,Q30KJ2,Q63474,Q63532,Q68G31                                                                                                                        |
| 1748 | 1,2,4,6,8,2<br>0,21,22 | 3,5,7,17,1<br>8,19,23,24 | 13 | O55145,P02631,P06911,P12020,P15399,P19629,P50280,P54921,P97580,Q10743,Q30KJ2,Q5GRG2,Q9JI85                                                                              |
| 1749 | 1,2,4,6,8,2<br>0,21,23 | 3,5,7,17,1<br>8,19,22,24 | 10 | P02631,P06911,P12020,P19629,P50280,P54921,Q10758,Q5GRG2,Q63532,Q9JI85                                                                                                   |
| 1750 | 1,2,4,6,8,2<br>0,21,24 | 3,5,7,17,1<br>8,19,22,23 | 19 | P02631,P02782,P06911,P07647,P08723,P12020,P15399,P19629,P30120,P50280,Q10743,Q10758,Q5GRG2,Q63474,Q68G31,Q6AYR9,Q812E4,Q9JHB9,Q9JI85                                    |

|      |                         |                          |    |                                                                                            |
|------|-------------------------|--------------------------|----|--------------------------------------------------------------------------------------------|
| 1751 | 1,2,4,6,8,2<br>0,22,23  | 3,5,7,17,1<br>8,19,21,24 | 13 | P06911,P12020,P15399,P19629,P42854,P50280,P54921,P97580,Q30KJ2,Q5GRG2,Q63532,Q6AY61,Q99MH3 |
| 1752 | 1,2,4,6,8,2<br>0,22,24  | 3,5,7,17,1<br>8,19,21,23 | 9  | P06911,P12020,P15399,P22006,P50280,P97580,Q10743,Q30KJ2,Q5GRG2                             |
| 1753 | 1,2,4,6,8,2<br>0,23,24  | 3,5,7,17,1<br>8,19,21,22 | 8  | P06911,P12020,P15399,P19629,P50280,Q5GRG2,Q63532,Q9QYP1                                    |
| 1754 | 1,2,4,6,8,2<br>1,22,23  | 3,5,7,17,1<br>8,19,20,24 | 6  | P15399,P30919,P54921,P97580,Q30KJ2,Q63532                                                  |
| 1755 | 1,2,4,6,8,2<br>1,22,24  | 3,5,7,17,1<br>8,19,20,23 | 6  | P15399,P30919,P97580,Q10743,Q30KJ2,Q63474                                                  |
| 1756 | 1,2,4,6,8,2<br>1,23,24  | 3,5,7,17,1<br>8,19,20,22 | 4  | P30919,P36860,Q63474,Q63532                                                                |
| 1757 | 1,2,4,6,8,2<br>2,23,24  | 3,5,7,17,1<br>8,19,20,21 | 13 | D3ZUC6,O54858,P00507,P06760,P15399,P23593,P30919,P47967,P97580,P97840,Q30KJ2,Q63532,Q6P6R2 |
| 1758 | 1,2,4,6,17,<br>18,19,20 | 3,5,7,8,21,<br>22,23,24  | 7  | G3V686,P08649,P19223,P35280,P55091,Q5GRG2,Q62714                                           |
| 1759 | 1,2,4,6,17,<br>18,19,21 | 3,5,7,8,20,<br>22,23,24  | 1  | P35280                                                                                     |
| 1760 | 1,2,4,6,17,<br>18,19,22 | 3,5,7,8,20,<br>21,23,24  | 4  | D3ZUC6,G3V686,P08649,Q9EQS0                                                                |
| 1761 | 1,2,4,6,17,<br>18,19,23 | 3,5,7,8,20,<br>21,22,24  | 2  | P35280,Q9EQS0                                                                              |
| 1762 | 1,2,4,6,17,<br>18,19,24 | 3,5,7,8,20,<br>21,22,23  | 2  | D3ZUC6,P35280                                                                              |
| 1763 | 1,2,4,6,17,<br>18,20,21 | 3,5,7,8,19,<br>22,23,24  | 5  | P01041,P19223,P35280,P55091,Q5GRG2                                                         |
| 1764 | 1,2,4,6,17,<br>18,20,22 | 3,5,7,8,19,<br>21,23,24  | 6  | D3ZUC6,G3V686,P19223,P55091,Q5GRG2,Q9Z0J6                                                  |
| 1765 | 1,2,4,6,17,<br>18,20,23 | 3,5,7,8,19,<br>21,22,24  | 5  | P19223,P35280,P55091,Q63467,Q9QYP1                                                         |
| 1766 | 1,2,4,6,17,<br>18,20,24 | 3,5,7,8,19,<br>21,22,23  | 5  | O35077,P19223,P35280,Q5GRG2,Q9QYP1                                                         |
| 1767 | 1,2,4,6,17,<br>18,21,22 | 3,5,7,8,19,<br>20,23,24  | 2  | D3ZUC6,P23739                                                                              |
| 1768 | 1,2,4,6,17,<br>18,21,23 | 3,5,7,8,19,<br>20,22,24  | 1  | P35280                                                                                     |
| 1769 | 1,2,4,6,17,<br>18,21,24 | 3,5,7,8,19,<br>20,22,23  | 3  | P01039,P35280,P36860                                                                       |
| 1770 | 1,2,4,6,17,<br>18,22,23 | 3,5,7,8,19,<br>20,21,24  | 4  | D3ZUC6,P06760,P47967,Q9EQS0                                                                |

|      |                                              |                                                    |
|------|----------------------------------------------|----------------------------------------------------|
| 1771 | 1,2,4,6,17, 3,5,7,8,19,<br>18,22,24 20,21,23 | 6 D3ZUC6,P06760,P22006,P47967,Q9EQS0,Q9WTT6        |
| 1772 | 1,2,4,6,17, 3,5,7,8,19,<br>18,23,24 20,21,22 | 7 D3ZUC6,P06760,P08937,P35280,P47967,Q9EQS0,Q9WTT6 |
| 1773 | 1,2,4,6,17, 3,5,7,8,18,<br>19,20,21 22,23,24 | 5 P19223,P35280,P36374,Q68G31,Q9JI85               |
| 1774 | 1,2,4,6,17, 3,5,7,8,18,<br>19,20,22 21,23,24 | 2 O89117,P19223                                    |
| 1775 | 1,2,4,6,17, 3,5,7,8,18,<br>19,20,23 21,22,24 | 3 P10758,P19223,P35280                             |
| 1776 | 1,2,4,6,17, 3,5,7,8,18,<br>19,20,24 21,22,23 | 4 P19223,P35280,P36374,Q68G31                      |
| 1777 | 1,2,4,6,17, 3,5,7,8,18,<br>19,21,22 20,23,24 | 1 Q9R168                                           |
| 1778 | 1,2,4,6,17, 3,5,7,8,18,<br>19,21,23 20,22,24 | 2 P35280,Q63474                                    |
| 1779 | 1,2,4,6,17, 3,5,7,8,18,<br>19,21,24 20,22,23 | 4 P35280,Q63474,Q68G31,Q9R168                      |
| 1780 | 1,2,4,6,17, 3,5,7,8,18,<br>19,22,23 20,21,24 | 6 D3ZUC6,P00507,P06760,P47967,Q811M5,Q9EQS0        |
| 1781 | 1,2,4,6,17, 3,5,7,8,18,<br>19,22,24 20,21,23 | 4 D3ZUC6,P00507,P06760,Q9R168                      |
| 1782 | 1,2,4,6,17, 3,5,7,8,18,<br>19,23,24 20,21,22 | 4 D3ZUC6,P06760,P35280,P47967                      |
| 1783 | 1,2,4,6,17, 3,5,7,8,18,<br>20,21,22 19,23,24 | 2 P19223,Q9Z0J6                                    |
| 1784 | 1,2,4,6,17, 3,5,7,8,18,<br>20,21,23 19,22,24 | 4 P19223,P35280,P55091,P63029                      |
| 1785 | 1,2,4,6,17, 3,5,7,8,18,<br>20,21,24 19,22,23 | 3 O35077,P19223,P35280                             |
| 1786 | 1,2,4,6,17, 3,5,7,8,18,<br>20,22,23 19,21,24 | 3 D3ZUC6,P19223,Q9EQS0                             |
| 1787 | 1,2,4,6,17, 3,5,7,8,18,<br>20,22,24 19,21,23 | 6 D3ZUC6,O35077,P06760,P19223,P22006,Q9Z0J6        |
| 1788 | 1,2,4,6,17, 3,5,7,8,18,<br>20,23,24 19,21,22 | 7 D3ZUC6,O35077,P06760,P08937,P19223,P35280,Q9QYP1 |
| 1789 | 1,2,4,6,17, 3,5,7,8,18,<br>21,22,23 19,20,24 | 2 D3ZUC6,Q9R168                                    |
| 1790 | 1,2,4,6,17, 3,5,7,8,18,<br>21,22,24 19,20,23 | 3 D3ZUC6,P36860,Q9R168                             |



|      |                                              |                                                                                 |
|------|----------------------------------------------|---------------------------------------------------------------------------------|
| 1791 | 1,2,4,6,17, 3,5,7,8,18,<br>21,23,24 19,20,22 | 6 D3ZUC6,P35280,P36860,P47967,Q63474,Q9R168                                     |
| 1792 | 1,2,4,6,17, 3,5,7,8,18,<br>22,23,24 19,20,21 | 11 D3ZUC6,P00507,P06760,P07335,P08937,P47967,P97840,Q5I0D1,Q9EQS0,Q9R168,Q9WTT6 |
| 1793 | 1,2,4,6,18, 3,5,7,8,17,<br>19,20,21 22,23,24 | 3 P35280,Q68G31,Q9JI85                                                          |
| 1794 | 1,2,4,6,18, 3,5,7,8,17,<br>19,20,22 21,23,24 | 2 Q80WL1,Q9EQS0                                                                 |
| 1795 | 1,2,4,6,18, 3,5,7,8,17,<br>19,20,23 21,22,24 | 2 P10758,P35280                                                                 |
| 1796 | 1,2,4,6,18, 3,5,7,8,17,<br>19,20,24 21,22,23 | 2 P35280,Q68G31                                                                 |
| 1797 | 1,2,4,6,18, 3,5,7,8,17,<br>19,21,22 20,23,24 | 1 P23739                                                                        |
| 1798 | 1,2,4,6,18, 3,5,7,8,17,<br>19,21,23 20,22,24 | 2 P06866,P35280                                                                 |
| 1799 | 1,2,4,6,18, 3,5,7,8,17,<br>19,21,24 20,22,23 | 3 B1H234,P35280,Q68G31                                                          |
| 1800 | 1,2,4,6,18, 3,5,7,8,17,<br>19,22,23 20,21,24 | 7 D3ZUC6,P00507,P06760,P13676,Q811M5,Q9EQS0,Q9WTT6                              |
| 1801 | 1,2,4,6,18, 3,5,7,8,17,<br>19,22,24 20,21,23 | 8 D3ZUC6,P00507,P06760,P13676,P22006,Q9EQS0,Q9QX74,Q9WTT6                       |
| 1802 | 1,2,4,6,18, 3,5,7,8,17,<br>19,23,24 20,21,22 | 7 D3ZUC6,P06760,P06866,P13676,P35280,Q9EQS0,Q9WTT6                              |
| 1803 | 1,2,4,6,18, 3,5,7,8,17,<br>20,21,22 19,23,24 | 3 O55145,P54921,Q5PQL7                                                          |
| 1804 | 1,2,4,6,18, 3,5,7,8,17,<br>20,21,23 19,22,24 | 2 P35280,P54921                                                                 |
| 1805 | 1,2,4,6,18, 3,5,7,8,17,<br>20,21,24 19,22,23 | 2 P35280,Q68G31                                                                 |
| 1806 | 1,2,4,6,18, 3,5,7,8,17,<br>20,22,23 19,21,24 | 5 P04355,P06760,P54921,Q9EQS0,Q9QX74                                            |
| 1807 | 1,2,4,6,18, 3,5,7,8,17,<br>20,22,24 19,21,23 | 4 D3ZUC6,P06760,P22006,Q9QX74                                                   |
| 1808 | 1,2,4,6,18, 3,5,7,8,17,<br>20,23,24 19,21,22 | 5 P06760,P35280,Q5QE79,Q9QX74,Q9QYP1                                            |
| 1809 | 1,2,4,6,18, 3,5,7,8,17,<br>21,22,23 19,20,24 | 5 P13676,P54921,Q63532,Q9EQS0,Q9WTT6                                            |
| 1810 | 1,2,4,6,18, 3,5,7,8,17,<br>21,22,24 19,20,23 | 3 D3ZUC6,P13676,Q9WTT6                                                          |

|      |                                              |                                                                                               |
|------|----------------------------------------------|-----------------------------------------------------------------------------------------------|
| 1811 | 1,2,4,6,18, 3,5,7,8,17,<br>21,23,24 19,20,22 | 3 P13676,P35280,Q9WTT6                                                                        |
| 1812 | 1,2,4,6,18, 3,5,7,8,17,<br>22,23,24 19,20,21 | 12 D3ZUC6,P00507,P06760,P13676,P22006,P47967,Q5I0D1,Q6P6R2,Q811M5,Q9EQS0,Q9QX74,Q9WTT6        |
| 1813 | 1,2,4,6,19, 3,5,7,8,17,<br>20,21,22 18,23,24 | 1 Q5PQL7                                                                                      |
| 1814 | 1,2,4,6,19, 3,5,7,8,17,<br>20,21,23 18,22,24 | 2 P10758,P35280                                                                               |
| 1815 | 1,2,4,6,19, 3,5,7,8,17,<br>20,21,24 18,22,23 | 7 O35547,P05369,P07647,P35280,P36374,Q68G31,Q9JI85                                            |
| 1816 | 1,2,4,6,19, 3,5,7,8,17,<br>20,22,23 18,21,24 | 5 P06760,P10758,Q811M5,Q9EQS0,Q9QX74                                                          |
| 1817 | 1,2,4,6,19, 3,5,7,8,17,<br>20,22,24 18,21,23 | 5 D3ZUC6,P06760,P22006,Q68G31,Q9QX74                                                          |
| 1818 | 1,2,4,6,19, 3,5,7,8,17,<br>20,23,24 18,21,22 | 6 P06760,P10758,P35280,Q68G31,Q9QX74,Q9QYP1                                                   |
| 1819 | 1,2,4,6,19, 3,5,7,8,17,<br>21,22,23 18,20,24 | 3 P13676,Q811M5,Q9EQS0                                                                        |
| 1820 | 1,2,4,6,19, 3,5,7,8,17,<br>21,22,24 18,20,23 | 3 D3ZUC6,P30919,Q9R168                                                                        |
| 1821 | 1,2,4,6,19, 3,5,7,8,17,<br>21,23,24 18,20,22 | 3 P07174,P35280,Q63474                                                                        |
| 1822 | 1,2,4,6,19, 3,5,7,8,17,<br>22,23,24 18,20,21 | 12 D3ZUC6,P00507,P06760,P13676,P22006,P26772,P47967,Q6P6R2,Q811M5,Q9EQS0,Q9QX74,Q9WTT6        |
| 1823 | 1,2,4,6,20, 3,5,7,8,17,<br>21,22,23 18,19,24 | 1 P54921                                                                                      |
| 1824 | 1,2,4,6,20, 3,5,7,8,17,<br>21,22,24 18,19,23 | 4 O55145,P01835,P22006,Q9QX74                                                                 |
| 1825 | 1,2,4,6,20, 3,5,7,8,17,<br>21,23,24 18,19,22 | 3 P01835,P35280,Q9QYP1                                                                        |
| 1826 | 1,2,4,6,20, 3,5,7,8,17,<br>22,23,24 18,19,21 | 8 D3ZUC6,P06760,P22006,Q5QE79,Q6P6R2,Q9EQS0,Q9QX74,Q9QYP1                                     |
| 1827 | 1,2,4,6,21, 3,5,7,8,17,<br>22,23,24 18,19,20 | 8 D3ZUC6,P13676,P30919,Q63532,Q811M5,Q9QX74,Q9R168,Q9WTT6                                     |
| 1828 | 1,2,4,7,8,1 3,5,6,20,2<br>7,18,19 1,22,23,24 | 4 G3V686,P20646,Q66H69,Q9Z1F2                                                                 |
| 1829 | 1,2,4,7,8,1 3,5,6,19,2<br>7,18,20 1,22,23,24 | 13 D4A5U3,G3V686,P06911,P19223,P25809,P47727,P55091,Q10758,Q4G075,Q5GRG2,Q811M5,Q9JHB9,Q9Z1F2 |
| 1830 | 1,2,4,7,8,1 3,5,6,19,2<br>7,18,21 0,22,23,24 | 5 P62804,Q00715,Q811M5,Q9QX74,Q9Z1F2                                                          |

|      |                        |                          |    |                                                                                                                                                                              |
|------|------------------------|--------------------------|----|------------------------------------------------------------------------------------------------------------------------------------------------------------------------------|
| 1831 | 1,2,4,7,8,1<br>7,18,22 | 3,5,6,19,2<br>0,21,23,24 | 4  | G3V686,P97580,Q30KJ2,Q9Z1F2                                                                                                                                                  |
| 1832 | 1,2,4,7,8,1<br>7,18,23 | 3,5,6,19,2<br>0,21,22,24 | 3  | O70594,Q63598,Q9Z1F2                                                                                                                                                         |
| 1833 | 1,2,4,7,8,1<br>7,18,24 | 3,5,6,19,2<br>0,21,22,23 | 3  | G3V686,Q63598,Q9Z1F2                                                                                                                                                         |
| 1834 | 1,2,4,7,8,1<br>7,19,20 | 3,5,6,18,2<br>1,22,23,24 | 17 | D4A5U3,iRT-<br>Kit_WR_fusion,P02780,P06911,P08723,P13676,P19223,P20646,P22282,P36374,P47727,Q4G075,<br>Q5GRG2,Q66H69,Q811M5,Q812E4,Q9WTT6                                    |
| 1835 | 1,2,4,7,8,1<br>7,19,21 | 3,5,6,18,2<br>0,22,23,24 | 9  | iRT-Kit_WR_fusion,P20646,P22006,P62804,Q00715,Q63474,Q66H69,Q9QX74,Q9Z1F2                                                                                                    |
| 1836 | 1,2,4,7,8,1<br>7,19,22 | 3,5,6,18,2<br>0,21,23,24 | 5  | iRT-Kit_WR_fusion,P20646,P97580,Q30KJ2,Q66H69                                                                                                                                |
| 1837 | 1,2,4,7,8,1<br>7,19,23 | 3,5,6,18,2<br>0,21,22,24 | 3  | iRT-Kit_WR_fusion,P21674,Q66H69                                                                                                                                              |
| 1838 | 1,2,4,7,8,1<br>7,19,24 | 3,5,6,18,2<br>0,21,22,23 | 3  | O54728,Q66H69,Q9Z1F2                                                                                                                                                         |
| 1839 | 1,2,4,7,8,1<br>7,20,21 | 3,5,6,18,1<br>9,22,23,24 | 22 | D4A5U3,iRT-<br>Kit_WR_fusion,P02780,P05964,P06911,P13676,P19223,P25809,P47727,P55091,P62804,Q00715,<br>Q10758,Q4G075,Q5GRG2,Q63493,Q6AYR9,Q811M5,Q812E4,Q9JHB9,Q9WTT6,Q9Z1F2 |
| 1840 | 1,2,4,7,8,1<br>7,20,22 | 3,5,6,18,1<br>9,21,23,24 | 5  | D4A5U3,P06911,P19223,Q4G075,Q5GRG2                                                                                                                                           |
| 1841 | 1,2,4,7,8,1<br>7,20,23 | 3,5,6,18,1<br>9,21,22,24 | 8  | D4A5U3,P06911,P10758,P19223,P55091,Q4G075,Q5GRG2,Q9QYP1                                                                                                                      |
| 1842 | 1,2,4,7,8,1<br>7,20,24 | 3,5,6,18,1<br>9,21,22,23 | 11 | D4A5U3,P06911,P08723,P19223,P47727,Q4G075,Q5GRG2,Q811M5,Q812E4,Q9JHB9,Q9QYP1                                                                                                 |
| 1843 | 1,2,4,7,8,1<br>7,21,22 | 3,5,6,18,1<br>9,20,23,24 | 2  | iRT-Kit_WR_fusion,Q9Z1F2                                                                                                                                                     |
| 1844 | 1,2,4,7,8,1<br>7,21,23 | 3,5,6,18,1<br>9,20,22,24 | 4  | iRT-Kit_WR_fusion,Q63474,Q9Z0V6,Q9Z1F2                                                                                                                                       |
| 1845 | 1,2,4,7,8,1<br>7,21,24 | 3,5,6,18,1<br>9,20,22,23 | 6  | P02782,P36860,Q63474,Q6AYR9,Q811M5,Q9Z1F2                                                                                                                                    |
| 1846 | 1,2,4,7,8,1<br>7,22,23 | 3,5,6,18,1<br>9,20,21,24 | 2  | Q30KJ2,Q9Z1F2                                                                                                                                                                |
| 1847 | 1,2,4,7,8,1<br>7,22,24 | 3,5,6,18,1<br>9,20,21,23 | 2  | P23593,Q9Z1F2                                                                                                                                                                |
| 1848 | 1,2,4,7,8,1<br>7,23,24 | 3,5,6,18,1<br>9,20,21,22 | 4  | Q5PQL7,Q63474,Q63598,Q9Z1F2                                                                                                                                                  |
| 1849 | 1,2,4,7,8,1<br>8,19,20 | 3,5,6,17,2<br>1,22,23,24 | 11 | D4A5U3,P02780,P06911,P22282,P36374,P47727,P50280,Q4G075,Q5GRG2,Q66H69,Q812E4                                                                                                 |

|      |                        |                          |                                                                                                                                                                                                                 |
|------|------------------------|--------------------------|-----------------------------------------------------------------------------------------------------------------------------------------------------------------------------------------------------------------|
| 1850 | 1,2,4,7,8,1<br>8,19,21 | 3,5,6,17,2<br>0,22,23,24 | 5 iRT - Kit_WR_fusion,P62804,Q00715,Q66H69,Q9Z1F2                                                                                                                                                               |
| 1851 | 1,2,4,7,8,1<br>8,19,22 | 3,5,6,17,2<br>0,21,23,24 | 4 P97580,Q30KJ2,Q66H69,Q9Z1F2                                                                                                                                                                                   |
| 1852 | 1,2,4,7,8,1<br>8,19,23 | 3,5,6,17,2<br>0,21,22,24 | 2 P20762,Q66H69                                                                                                                                                                                                 |
| 1853 | 1,2,4,7,8,1<br>8,19,24 | 3,5,6,17,2<br>0,21,22,23 | 3 O54728,Q66H69,Q9Z1F2                                                                                                                                                                                          |
| 1854 | 1,2,4,7,8,1<br>8,20,21 | 3,5,6,17,1<br>9,22,23,24 | D4A5U3,iRT -<br>17 Kit_WR_fusion,P02780,P06911,P25809,P47727,P50280,P62804,Q00715,Q10758,Q4G075,Q5GRG2,Q811M5,Q812E4,Q91ZS3,Q9JHB9,Q9Z1F2                                                                       |
| 1855 | 1,2,4,7,8,1<br>8,20,22 | 3,5,6,17,1<br>9,21,23,24 | 6 P02780,P06911,P50280,Q30KJ2,Q4G075,Q5GRG2                                                                                                                                                                     |
| 1856 | 1,2,4,7,8,1<br>8,20,23 | 3,5,6,17,1<br>9,21,22,24 | 4 P06911,P10758,P20762,Q4G075                                                                                                                                                                                   |
| 1857 | 1,2,4,7,8,1<br>8,20,24 | 3,5,6,17,1<br>9,21,22,23 | 10 P02780,P06911,P08723,P50280,Q4G075,Q5GRG2,Q812E4,Q9JHB9,Q9QYP1,Q9Z1F2                                                                                                                                        |
| 1858 | 1,2,4,7,8,1<br>8,21,22 | 3,5,6,17,1<br>9,20,23,24 | 2 Q30KJ2,Q9Z1F2                                                                                                                                                                                                 |
| 1859 | 1,2,4,7,8,1<br>8,21,23 | 3,5,6,17,1<br>9,20,22,24 | 2 O89117,Q9Z1F2                                                                                                                                                                                                 |
| 1860 | 1,2,4,7,8,1<br>8,21,24 | 3,5,6,17,1<br>9,20,22,23 | 4 O89117,Q00715,Q63474,Q9Z1F2                                                                                                                                                                                   |
| 1861 | 1,2,4,7,8,1<br>8,22,23 | 3,5,6,17,1<br>9,20,21,24 | 5 P20762,P54921,Q30KJ2,Q6AYQ8,Q9Z1F2                                                                                                                                                                            |
| 1862 | 1,2,4,7,8,1<br>8,22,24 | 3,5,6,17,1<br>9,20,21,23 | 2 Q30KJ2,Q9Z1F2                                                                                                                                                                                                 |
| 1863 | 1,2,4,7,8,1<br>8,23,24 | 3,5,6,17,1<br>9,20,21,22 | 5 P20762,Q3ZAV1,Q63598,Q6AYQ8,Q9Z1F2                                                                                                                                                                            |
| 1864 | 1,2,4,7,8,1<br>9,20,21 | 3,5,6,17,1<br>8,22,23,24 | D4A5U3,iRT -<br>27 Kit_WR_fusion,O08815,P02780,P02781,P04905,P05369,P08723,P0C0A9,P22282,P22283,P24368,P30120,P36374,P40241,P50280,P62804,Q00715,Q4G075,Q5I0D1,Q63493,Q63617,Q66H69,Q812E4,Q9JHB9,Q9J185,Q9WTT6 |
| 1865 | 1,2,4,7,8,1<br>9,20,22 | 3,5,6,17,1<br>8,21,23,24 | 7 D4A5U3,iRT - Kit_WR_fusion,P02780,P36374,P50280,P80299,Q4G075                                                                                                                                                 |
| 1866 | 1,2,4,7,8,1<br>9,20,23 | 3,5,6,17,1<br>8,21,22,24 | 6 D4A5U3,iRT - Kit_WR_fusion,P02780,P10758,Q4G075,Q812E4                                                                                                                                                        |
| 1867 | 1,2,4,7,8,1<br>9,20,24 | 3,5,6,17,1<br>8,21,22,23 | D4A5U3,iRT -<br>15 Kit_WR_fusion,O54728,P02780,P08723,P09456,P0C0A9,P22282,P36374,P50280,Q4G075,Q66H69,Q6TMA8,Q812E4,Q9JHB9                                                                                     |

|      |                         |                          |                                                                                                              |
|------|-------------------------|--------------------------|--------------------------------------------------------------------------------------------------------------|
| 1868 | 1,2,4,7,8,1<br>9,21,22  | 3,5,6,17,1<br>8,20,23,24 | 2 iRT-Kit_WR_fusion,Q66H69                                                                                   |
| 1869 | 1,2,4,7,8,1<br>9,21,23  | 3,5,6,17,1<br>8,20,22,24 | 3 iRT-Kit_WR_fusion,Q63474,Q66H69                                                                            |
| 1870 | 1,2,4,7,8,1<br>9,21,24  | 3,5,6,17,1<br>8,20,22,23 | 6 iRT-Kit_WR_fusion,O54728,P02782,Q63474,Q66H69,Q9Z1F2                                                       |
| 1871 | 1,2,4,7,8,1<br>9,22,23  | 3,5,6,17,1<br>8,20,21,24 | 2 iRT-Kit_WR_fusion,Q30KJ2                                                                                   |
| 1872 | 1,2,4,7,8,1<br>9,22,24  | 3,5,6,17,1<br>8,20,21,23 | 2 iRT-Kit_WR_fusion,O54728                                                                                   |
| 1873 | 1,2,4,7,8,1<br>9,23,24  | 3,5,6,17,1<br>8,20,21,22 | 4 iRT-Kit_WR_fusion,O54728,Q66H69,Q6AYQ8                                                                     |
| 1874 | 1,2,4,7,8,2<br>0,21,22  | 3,5,6,17,1<br>8,19,23,24 | 6 D4A5U3,iRT-Kit_WR_fusion,P02780,Q4G075,Q812E4,Q9JHB9                                                       |
| 1875 | 1,2,4,7,8,2<br>0,21,23  | 3,5,6,17,1<br>8,19,22,24 | 8 D4A5U3,iRT-Kit_WR_fusion,P02780,P10758,P19629,Q10758,Q4G075,Q812E4                                         |
| 1876 | 1,2,4,7,8,2<br>0,21,24  | 3,5,6,17,1<br>8,19,22,23 | D4A5U3,iRT-<br>13 Kit_WR_fusion,P02780,P02781,P02782,P08723,P09456,P30120,Q63474,Q6AYR9,Q811M5,Q812E4,Q9JHB9 |
| 1877 | 1,2,4,7,8,2<br>0,22,23  | 3,5,6,17,1<br>8,19,21,24 | 2 P10758,Q4G075                                                                                              |
| 1878 | 1,2,4,7,8,2<br>0,22,24  | 3,5,6,17,1<br>8,19,21,23 | 2 Q4G075,Q9JHB9                                                                                              |
| 1879 | 1,2,4,7,8,2<br>0,23,24  | 3,5,6,17,1<br>8,19,21,22 | 4 P10758,Q4G075,Q812E4,Q9QYP1                                                                                |
| 1880 | 1,2,4,7,8,2<br>1,22,23  | 3,5,6,17,1<br>8,19,20,24 | 2 iRT-Kit_WR_fusion,Q9Z1F2                                                                                   |
| 1881 | 1,2,4,7,8,2<br>1,22,24  | 3,5,6,17,1<br>8,19,20,23 | 4 iRT-Kit_WR_fusion,Q63474,Q6AYR9,Q9Z1F2                                                                     |
| 1882 | 1,2,4,7,8,2<br>1,23,24  | 3,5,6,17,1<br>8,19,20,22 | 4 iRT-Kit_WR_fusion,Q63474,Q6AYR9,Q9Z1F2                                                                     |
| 1883 | 1,2,4,7,8,2<br>2,23,24  | 3,5,6,17,1<br>8,19,20,21 | 3 Q6AYQ8,Q6P6R2,Q9Z1F2                                                                                       |
| 1884 | 1,2,4,7,17,<br>18,19,20 | 3,5,6,8,21,<br>22,23,24  | 6 G3V686,P19223,P20646,P30919,P36374,Q62714                                                                  |
| 1885 | 1,2,4,7,17,<br>18,19,21 | 3,5,6,8,20,<br>22,23,24  | 1 P20646                                                                                                     |
| 1886 | 1,2,4,7,17,<br>18,19,22 | 3,5,6,8,20,<br>21,23,24  | 2 G3V686,P80299                                                                                              |
| 1887 | 1,2,4,7,17,<br>18,19,23 | 3,5,6,8,20,<br>21,22,24  | 0                                                                                                            |

|      |                                              |                                      |
|------|----------------------------------------------|--------------------------------------|
| 1888 | 1,2,4,7,17, 3,5,6,8,20,<br>18,19,24 21,22,23 | 0                                    |
| 1889 | 1,2,4,7,17, 3,5,6,8,19,<br>18,20,21 22,23,24 | 5 P00507,P19223,P25809,P55091,Q811M5 |
| 1890 | 1,2,4,7,17, 3,5,6,8,19,<br>18,20,22 21,23,24 | 3 G3V686,P19223,Q9Z0J6               |
| 1891 | 1,2,4,7,17, 3,5,6,8,19,<br>18,20,23 21,22,24 | 5 P10758,P19223,P30919,P55091,Q9QYP1 |
| 1892 | 1,2,4,7,17, 3,5,6,8,19,<br>18,20,24 21,22,23 | 4 P08937,P19223,Q811M5,Q9QYP1        |
| 1893 | 1,2,4,7,17, 3,5,6,8,19,<br>18,21,22 20,23,24 | 1 Q9Z1F2                             |
| 1894 | 1,2,4,7,17, 3,5,6,8,19,<br>18,21,23 20,22,24 | 1 Q9Z1F2                             |
| 1895 | 1,2,4,7,17, 3,5,6,8,19,<br>18,21,24 20,22,23 | 2 P19218,Q9Z1F2                      |
| 1896 | 1,2,4,7,17, 3,5,6,8,19,<br>18,22,23 20,21,24 | 1 Q9EQS0                             |
| 1897 | 1,2,4,7,17, 3,5,6,8,19,<br>18,22,24 20,21,23 | 2 D3ZUC6,Q9Z1F2                      |
| 1898 | 1,2,4,7,17, 3,5,6,8,19,<br>18,23,24 20,21,22 | 2 P08937,Q64268                      |
| 1899 | 1,2,4,7,17, 3,5,6,8,18,<br>19,20,21 22,23,24 | 3 P19223,P20646,P36374               |
| 1900 | 1,2,4,7,17, 3,5,6,8,18,<br>19,20,22 21,23,24 | 3 P19223,P20646,P80299               |
| 1901 | 1,2,4,7,17, 3,5,6,8,18,<br>19,20,23 21,22,24 | 3 P10758,P19223,P80299               |
| 1902 | 1,2,4,7,17, 3,5,6,8,18,<br>19,20,24 21,22,23 | 4 P19223,P36374,P54921,Q9QYP1        |
| 1903 | 1,2,4,7,17, 3,5,6,8,18,<br>19,21,22 20,23,24 | 2 P80299,Q9R168                      |
| 1904 | 1,2,4,7,17, 3,5,6,8,18,<br>19,21,23 20,22,24 | 1 Q9R168                             |
| 1905 | 1,2,4,7,17, 3,5,6,8,18,<br>19,21,24 20,22,23 | 3 Q62761;Q62762;Q62763,Q63474,Q9R168 |
| 1906 | 1,2,4,7,17, 3,5,6,8,18,<br>19,22,23 20,21,24 | 2 P80299,Q9R168                      |
| 1907 | 1,2,4,7,17, 3,5,6,8,18,<br>19,22,24 20,21,23 | 2 D3ZUC6,Q9R168                      |

|      |                                              |                               |
|------|----------------------------------------------|-------------------------------|
| 1908 | 1,2,4,7,17, 3,5,6,8,18,<br>19,23,24 20,21,22 | 1 Q9R168                      |
| 1909 | 1,2,4,7,17, 3,5,6,8,18,<br>20,21,22 19,23,24 | 4 P19223,P80299,Q9R168,Q9Z0J6 |
| 1910 | 1,2,4,7,17, 3,5,6,8,18,<br>20,21,23 19,22,24 | 2 P19223,Q9QYP1               |
| 1911 | 1,2,4,7,17, 3,5,6,8,18,<br>20,21,24 19,22,23 | 3 P19223,Q811M5,Q9QYP1        |
| 1912 | 1,2,4,7,17, 3,5,6,8,18,<br>20,22,23 19,21,24 | 4 P08937,P19223,P80299,Q9QYP1 |
| 1913 | 1,2,4,7,17, 3,5,6,8,18,<br>20,22,24 19,21,23 | 4 P08937,P19223,Q9QYP1,Q9Z0J6 |
| 1914 | 1,2,4,7,17, 3,5,6,8,18,<br>20,23,24 19,21,22 | 4 P08937,P10758,P19223,Q9QYP1 |
| 1915 | 1,2,4,7,17, 3,5,6,8,18,<br>21,22,23 19,20,24 | 2 P80299,Q9R168               |
| 1916 | 1,2,4,7,17, 3,5,6,8,18,<br>21,22,24 19,20,23 | 2 Q9R168,Q9Z1F2               |
| 1917 | 1,2,4,7,17, 3,5,6,8,18,<br>21,23,24 19,20,22 | 3 P36860,Q63474,Q9R168        |
| 1918 | 1,2,4,7,17, 3,5,6,8,18,<br>22,23,24 19,20,21 | 3 D3ZUC6,P08937,Q9R168        |
| 1919 | 1,2,4,7,18, 3,5,6,8,17,<br>19,20,21 22,23,24 | 2 O08815,P80299               |
| 1920 | 1,2,4,7,18, 3,5,6,8,17,<br>19,20,22 21,23,24 | 2 P80299,Q80WL1               |
| 1921 | 1,2,4,7,18, 3,5,6,8,17,<br>19,20,23 21,22,24 | 2 P10758,P80299               |
| 1922 | 1,2,4,7,18, 3,5,6,8,17,<br>19,20,24 21,22,23 | 1 Q9QYP1                      |
| 1923 | 1,2,4,7,18, 3,5,6,8,17,<br>19,21,22 20,23,24 | 2 P36376,P80299               |
| 1924 | 1,2,4,7,18, 3,5,6,8,17,<br>19,21,23 20,22,24 | 2 P06866,P80299               |
| 1925 | 1,2,4,7,18, 3,5,6,8,17,<br>19,21,24 20,22,23 | 1 P36376                      |
| 1926 | 1,2,4,7,18, 3,5,6,8,17,<br>19,22,23 20,21,24 | 3 P80299,Q6AYQ8,Q9EQS0        |
| 1927 | 1,2,4,7,18, 3,5,6,8,17,<br>19,22,24 20,21,23 | 1 P36376                      |

|      |                                              |                                                           |
|------|----------------------------------------------|-----------------------------------------------------------|
| 1928 | 1,2,4,7,18, 3,5,6,8,17,<br>19,23,24 20,21,22 | 1 Q6AYQ8                                                  |
| 1929 | 1,2,4,7,18, 3,5,6,8,17,<br>20,21,22 19,23,24 | 1 P80299                                                  |
| 1930 | 1,2,4,7,18, 3,5,6,8,17,<br>20,21,23 19,22,24 | 2 P10758,Q9QYP1                                           |
| 1931 | 1,2,4,7,18, 3,5,6,8,17,<br>20,21,24 19,22,23 | 1 Q9QYP1                                                  |
| 1932 | 1,2,4,7,18, 3,5,6,8,17,<br>20,22,23 19,21,24 | 3 P10758,P80299,Q9EQS0                                    |
| 1933 | 1,2,4,7,18, 3,5,6,8,17,<br>20,22,24 19,21,23 | 1 Q9QYP1                                                  |
| 1934 | 1,2,4,7,18, 3,5,6,8,17,<br>20,23,24 19,21,22 | 3 P08937,P10758,Q9QYP1                                    |
| 1935 | 1,2,4,7,18, 3,5,6,8,17,<br>21,22,23 19,20,24 | 1 P80299                                                  |
| 1936 | 1,2,4,7,18, 3,5,6,8,17,<br>21,22,24 19,20,23 | 2 P36376,Q9Z1F2                                           |
| 1937 | 1,2,4,7,18, 3,5,6,8,17,<br>21,23,24 19,20,22 | 1 O89117                                                  |
| 1938 | 1,2,4,7,18, 3,5,6,8,17,<br>22,23,24 19,20,21 | 8 D3ZUC6,P06760,P08937,P13676,Q64268,Q6AYQ8,Q6P6R2,Q9EQS0 |
| 1939 | 1,2,4,7,19, 3,5,6,8,17,<br>20,21,22 18,23,24 | 1 P80299                                                  |
| 1940 | 1,2,4,7,19, 3,5,6,8,17,<br>20,21,23 18,22,24 | 2 P10758,P80299                                           |
| 1941 | 1,2,4,7,19, 3,5,6,8,17,<br>20,21,24 18,22,23 | 4 O35547,P08723,P36374,Q63617                             |
| 1942 | 1,2,4,7,19, 3,5,6,8,17,<br>20,22,23 18,21,24 | 2 P10758,P80299                                           |
| 1943 | 1,2,4,7,19, 3,5,6,8,17,<br>20,22,24 18,21,23 | 1 P80299                                                  |
| 1944 | 1,2,4,7,19, 3,5,6,8,17,<br>20,23,24 18,21,22 | 2 P10758,Q9QYP1                                           |
| 1945 | 1,2,4,7,19, 3,5,6,8,17,<br>21,22,23 18,20,24 | 2 P80299,Q9R168                                           |
| 1946 | 1,2,4,7,19, 3,5,6,8,17,<br>21,22,24 18,20,23 | 2 P36376,Q9R168                                           |
| 1947 | 1,2,4,7,19, 3,5,6,8,17,<br>21,23,24 18,20,22 | 4 P14173,Q62761;Q62762;Q62763,Q63474,Q9R168               |



|      |                                              |                                                           |
|------|----------------------------------------------|-----------------------------------------------------------|
| 1948 | 1,2,4,7,19, 3,5,6,8,17,<br>22,23,24 18,20,21 | 5 D3ZUC6,P26772,P80299,Q6AYQ8,Q9R168                      |
| 1949 | 1,2,4,7,20, 3,5,6,8,17,<br>21,22,23 18,19,24 | 1 P80299                                                  |
| 1950 | 1,2,4,7,20, 3,5,6,8,17,<br>21,22,24 18,19,23 | 1 P01835                                                  |
| 1951 | 1,2,4,7,20, 3,5,6,8,17,<br>21,23,24 18,19,22 | 3 P01835,P10758,Q9QYP1                                    |
| 1952 | 1,2,4,7,20, 3,5,6,8,17,<br>22,23,24 18,19,21 | 4 P08937,P10758,Q9QX74,Q9QYP1                             |
| 1953 | 1,2,4,7,21, 3,5,6,8,17,<br>22,23,24 18,19,20 | 1 Q9R168                                                  |
| 1954 | 1,2,4,8,17, 3,5,6,7,21,<br>18,19,20 22,23,24 | 8 D4A5U3,G3V686,P19223,P25809,P36374,P47727,Q10758,Q62714 |
| 1955 | 1,2,4,8,17, 3,5,6,7,20,<br>18,19,21 22,23,24 | 1 Q66H69                                                  |
| 1956 | 1,2,4,8,17, 3,5,6,7,20,<br>18,19,22 21,23,24 | 3 G3V686,P97580,Q30KJ2                                    |
| 1957 | 1,2,4,8,17, 3,5,6,7,20,<br>18,19,23 21,22,24 | 1 G3V686                                                  |
| 1958 | 1,2,4,8,17, 3,5,6,7,20,<br>18,19,24 21,22,23 | 3 G3V686,O54728,Q66H69                                    |
| 1959 | 1,2,4,8,17, 3,5,6,7,19,<br>18,20,21 22,23,24 | 7 D4A5U3,P19223,P25809,P47727,P55091,Q10758,Q811M5        |
| 1960 | 1,2,4,8,17, 3,5,6,7,19,<br>18,20,22 21,23,24 | 4 G3V686,P19223,P25809,Q30KJ2                             |
| 1961 | 1,2,4,8,17, 3,5,6,7,19,<br>18,20,23 21,22,24 | 4 G3V686,P19223,P55091,Q10758                             |
| 1962 | 1,2,4,8,17, 3,5,6,7,19,<br>18,20,24 21,22,23 | 6 G3V686,P19223,P47727,Q10758,Q811M5,Q9QYP1               |
| 1963 | 1,2,4,8,17, 3,5,6,7,19,<br>18,21,22 20,23,24 | 2 Q30KJ2,Q9Z1F2                                           |
| 1964 | 1,2,4,8,17, 3,5,6,7,19,<br>18,21,23 20,22,24 | 0                                                         |
| 1965 | 1,2,4,8,17, 3,5,6,7,19,<br>18,21,24 20,22,23 | 1 Q9Z1F2                                                  |
| 1966 | 1,2,4,8,17, 3,5,6,7,19,<br>18,22,23 20,21,24 | 2 P47967,Q30KJ2                                           |
| 1967 | 1,2,4,8,17, 3,5,6,7,19,<br>18,22,24 20,21,23 | 5 D3ZUC6,G3V686,P47967,Q30KJ2,Q9Z1F2                      |

|      |                                              |                                                                                                   |
|------|----------------------------------------------|---------------------------------------------------------------------------------------------------|
| 1968 | 1,2,4,8,17, 3,5,6,7,19,<br>18,23,24 20,21,22 | 1 P47967                                                                                          |
| 1969 | 1,2,4,8,17, 3,5,6,7,18,<br>19,20,21 22,23,24 | 13 B0LT89,D4A5U3,P04905,P19223,P25809,P30120,P36374,P47727,P97675,Q10758,Q66H69,Q6P6<br>R2,Q9JI85 |
| 1970 | 1,2,4,8,17, 3,5,6,7,18,<br>19,20,22 21,23,24 | 4 D4A5U3,O89117,P19223,P36374                                                                     |
| 1971 | 1,2,4,8,17, 3,5,6,7,18,<br>19,20,23 21,22,24 | 3 P10758,P19223,Q8CJD3                                                                            |
| 1972 | 1,2,4,8,17, 3,5,6,7,18,<br>19,20,24 21,22,23 | 8 D4A5U3,O54728,P08723,P19223,P36374,P47727,P60905,Q68G31                                         |
| 1973 | 1,2,4,8,17, 3,5,6,7,18,<br>19,21,22 20,23,24 | 1 Q66H69                                                                                          |
| 1974 | 1,2,4,8,17, 3,5,6,7,18,<br>19,21,23 20,22,24 | 2 Q63474,Q66H69                                                                                   |
| 1975 | 1,2,4,8,17, 3,5,6,7,18,<br>19,21,24 20,22,23 | 3 O54728,Q63474,Q66H69                                                                            |
| 1976 | 1,2,4,8,17, 3,5,6,7,18,<br>19,22,23 20,21,24 | 3 P00507,P47967,Q30KJ2                                                                            |
| 1977 | 1,2,4,8,17, 3,5,6,7,18,<br>19,22,24 20,21,23 | 3 D3ZUC6,O54728,P00507                                                                            |
| 1978 | 1,2,4,8,17, 3,5,6,7,18,<br>19,23,24 20,21,22 | 2 O54728,P47967                                                                                   |
| 1979 | 1,2,4,8,17, 3,5,6,7,18,<br>20,21,22 19,23,24 | 4 D4A5U3,P19223,P25809,Q10758                                                                     |
| 1980 | 1,2,4,8,17, 3,5,6,7,18,<br>20,21,23 19,22,24 | 3 D4A5U3,P19223,Q10758                                                                            |
| 1981 | 1,2,4,8,17, 3,5,6,7,18,<br>20,21,24 19,22,23 | 9 D4A5U3,P02782,P19223,P30120,P47727,P97675,Q10758,Q6AYR9,Q811M5                                  |
| 1982 | 1,2,4,8,17, 3,5,6,7,18,<br>20,22,23 19,21,24 | 1 P19223                                                                                          |
| 1983 | 1,2,4,8,17, 3,5,6,7,18,<br>20,22,24 19,21,23 | 1 P19223                                                                                          |
| 1984 | 1,2,4,8,17, 3,5,6,7,18,<br>20,23,24 19,21,22 | 2 P19223,Q9QYP1                                                                                   |
| 1985 | 1,2,4,8,17, 3,5,6,7,18,<br>21,22,23 19,20,24 | 0                                                                                                 |
| 1986 | 1,2,4,8,17, 3,5,6,7,18,<br>21,22,24 19,20,23 | 1 Q9Z1F2                                                                                          |
| 1987 | 1,2,4,8,17, 3,5,6,7,18,<br>21,23,24 19,20,22 | 1 Q63474                                                                                          |

|      |                                              |                                                    |
|------|----------------------------------------------|----------------------------------------------------|
| 1988 | 1,2,4,8,17, 3,5,6,7,18,<br>22,23,24 19,20,21 | 5 D3ZUC6,P00507,P47967,P97840,Q5I0D1               |
| 1989 | 1,2,4,8,18, 3,5,6,7,17,<br>19,20,21 22,23,24 | 7 O08815,P25809,P36374,P47727,Q10758,Q66H69,Q68G31 |
| 1990 | 1,2,4,8,18, 3,5,6,7,17,<br>19,20,22 21,23,24 | 4 P04762,P15399,Q30KJ2,Q6AY61                      |
| 1991 | 1,2,4,8,18, 3,5,6,7,17,<br>19,20,23 21,22,24 | 1 P10758                                           |
| 1992 | 1,2,4,8,18, 3,5,6,7,17,<br>19,20,24 21,22,23 | 3 O54728,P36374,Q68G31                             |
| 1993 | 1,2,4,8,18, 3,5,6,7,17,<br>19,21,22 20,23,24 | 1 Q30KJ2                                           |
| 1994 | 1,2,4,8,18, 3,5,6,7,17,<br>19,21,23 20,22,24 | 1 P06866                                           |
| 1995 | 1,2,4,8,18, 3,5,6,7,17,<br>19,21,24 20,22,23 | 3 O54728,Q66H69,Q68G31                             |
| 1996 | 1,2,4,8,18, 3,5,6,7,17,<br>19,22,23 20,21,24 | 4 P00507,P04762,Q30KJ2,Q6AY61                      |
| 1997 | 1,2,4,8,18, 3,5,6,7,17,<br>19,22,24 20,21,23 | 4 O54728,P00507,Q07523,Q30KJ2                      |
| 1998 | 1,2,4,8,18, 3,5,6,7,17,<br>19,23,24 20,21,22 | 1 O54728                                           |
| 1999 | 1,2,4,8,18, 3,5,6,7,17,<br>20,21,22 19,23,24 | 3 P25809,P54921,Q10758                             |
| 2000 | 1,2,4,8,18, 3,5,6,7,17,<br>20,21,23 19,22,24 | 2 P54921,Q10758                                    |
| 2001 | 1,2,4,8,18, 3,5,6,7,17,<br>20,21,24 19,22,23 | 1 Q10758                                           |
| 2002 | 1,2,4,8,18, 3,5,6,7,17,<br>20,22,23 19,21,24 | 4 P05539,P54921,Q5QE79,Q6AY61                      |
| 2003 | 1,2,4,8,18, 3,5,6,7,17,<br>20,22,24 19,21,23 | 0                                                  |
| 2004 | 1,2,4,8,18, 3,5,6,7,17,<br>20,23,24 19,21,22 | 3 P05539,Q5QE79,Q9QYP1                             |
| 2005 | 1,2,4,8,18, 3,5,6,7,17,<br>21,22,23 19,20,24 | 1 P54921                                           |
| 2006 | 1,2,4,8,18, 3,5,6,7,17,<br>21,22,24 19,20,23 | 1 Q9Z1F2                                           |
| 2007 | 1,2,4,8,18, 3,5,6,7,17,<br>21,23,24 19,20,22 | 1 O89117                                           |

|      |                                              |                                                                  |
|------|----------------------------------------------|------------------------------------------------------------------|
| 2008 | 1,2,4,8,18, 3,5,6,7,17,<br>22,23,24 19,20,21 | 5 D3ZUC6,P00507,P47967,Q5QE79,Q6P6R2                             |
| 2009 | 1,2,4,8,19, 3,5,6,7,17,<br>20,21,22 18,23,24 | 0                                                                |
| 2010 | 1,2,4,8,19, 3,5,6,7,17,<br>20,21,23 18,22,24 | 2 P10758,Q812E4                                                  |
| 2011 | 1,2,4,8,19, 3,5,6,7,17,<br>20,21,24 18,22,23 | 9 O35547,O54728,P02782,P08723,P30120,P36374,P60905,Q68G31,Q812E4 |
| 2012 | 1,2,4,8,19, 3,5,6,7,17,<br>20,22,23 18,21,24 | 3 P04762,P10758,Q6AY61                                           |
| 2013 | 1,2,4,8,19, 3,5,6,7,17,<br>20,22,24 18,21,23 | 2 O54728,P15399                                                  |
| 2014 | 1,2,4,8,19, 3,5,6,7,17,<br>20,23,24 18,21,22 | 3 O54728,P10758,Q9QYP1                                           |
| 2015 | 1,2,4,8,19, 3,5,6,7,17,<br>21,22,23 18,20,24 | 0                                                                |
| 2016 | 1,2,4,8,19, 3,5,6,7,17,<br>21,22,24 18,20,23 | 1 O54728                                                         |
| 2017 | 1,2,4,8,19, 3,5,6,7,17,<br>21,23,24 18,20,22 | 2 O54728,Q63474                                                  |
| 2018 | 1,2,4,8,19, 3,5,6,7,17,<br>22,23,24 18,20,21 | 4 O54728,P00507,P26772,P47967                                    |
| 2019 | 1,2,4,8,20, 3,5,6,7,17,<br>21,22,23 18,19,24 | 1 P54921                                                         |
| 2020 | 1,2,4,8,20, 3,5,6,7,17,<br>21,22,24 18,19,23 | 0                                                                |
| 2021 | 1,2,4,8,20, 3,5,6,7,17,<br>21,23,24 18,19,22 | 3 Q10758,Q812E4,Q9QYP1                                           |
| 2022 | 1,2,4,8,20, 3,5,6,7,17,<br>22,23,24 18,19,21 | 3 P05539,Q5QE79,Q9QYP1                                           |
| 2023 | 1,2,4,8,21, 3,5,6,7,17,<br>22,23,24 18,19,20 | 1 P30919                                                         |
| 2024 | 1,2,4,17,1 3,5,6,7,8,2<br>8,19,20,21 2,23,24 | 5 P19223,P25809,P35280,Q62714,Q6P6R2                             |
| 2025 | 1,2,4,17,1 3,5,6,7,8,2<br>8,19,20,22 1,23,24 | 2 G3V686,Q62714                                                  |
| 2026 | 1,2,4,17,1 3,5,6,7,8,2<br>8,19,20,23 1,22,24 | 4 P10758,P30919,P35280,Q62714                                    |
| 2027 | 1,2,4,17,1 3,5,6,7,8,2<br>8,19,20,24 1,22,23 | 4 G3V686,P35280,Q62714,Q9QYP1                                    |

|      |                                              |                                                           |
|------|----------------------------------------------|-----------------------------------------------------------|
| 2028 | 1,2,4,17,1 3,5,6,7,8,2<br>8,19,21,22 0,23,24 | 0                                                         |
| 2029 | 1,2,4,17,1 3,5,6,7,8,2<br>8,19,21,23 0,22,24 | 1 P35280                                                  |
| 2030 | 1,2,4,17,1 3,5,6,7,8,2<br>8,19,21,24 0,22,23 | 1 P35280                                                  |
| 2031 | 1,2,4,17,1 3,5,6,7,8,2<br>8,19,22,23 0,21,24 | 2 D3ZUC6,Q9EQS0                                           |
| 2032 | 1,2,4,17,1 3,5,6,7,8,2<br>8,19,22,24 0,21,23 | 1 D3ZUC6                                                  |
| 2033 | 1,2,4,17,1 3,5,6,7,8,2<br>8,19,23,24 0,21,22 | 3 D3ZUC6,P08937,P35280                                    |
| 2034 | 1,2,4,17,1 3,5,6,7,8,1<br>8,20,21,22 9,23,24 | 1 P19223                                                  |
| 2035 | 1,2,4,17,1 3,5,6,7,8,1<br>8,20,21,23 9,22,24 | 2 P19223,P35280                                           |
| 2036 | 1,2,4,17,1 3,5,6,7,8,1<br>8,20,21,24 9,22,23 | 4 P19223,P35280,P50115,Q9QYP1                             |
| 2037 | 1,2,4,17,1 3,5,6,7,8,1<br>8,20,22,23 9,21,24 | 1 P08937                                                  |
| 2038 | 1,2,4,17,1 3,5,6,7,8,1<br>8,20,22,24 9,21,23 | 5 D3ZUC6,O35077,P08937,P50115,Q9QYP1                      |
| 2039 | 1,2,4,17,1 3,5,6,7,8,1<br>8,20,23,24 9,21,22 | 4 P08937,P35280,P50115,Q9QYP1                             |
| 2040 | 1,2,4,17,1 3,5,6,7,8,1<br>8,21,22,23 9,20,24 | 0                                                         |
| 2041 | 1,2,4,17,1 3,5,6,7,8,1<br>8,21,22,24 9,20,23 | 2 D3ZUC6,P50115                                           |
| 2042 | 1,2,4,17,1 3,5,6,7,8,1<br>8,21,23,24 9,20,22 | 2 P19218,P35280                                           |
| 2043 | 1,2,4,17,1 3,5,6,7,8,1<br>8,22,23,24 9,20,21 | 8 D3ZUC6,P06760,P08937,P47967,Q5I0D1,Q63617,Q9EQS0,Q9WTT6 |
| 2044 | 1,2,4,17,1 3,5,6,7,8,1<br>9,20,21,22 8,23,24 | 1 P19223                                                  |
| 2045 | 1,2,4,17,1 3,5,6,7,8,1<br>9,20,21,23 8,22,24 | 3 P10758,P19223,P35280                                    |
| 2046 | 1,2,4,17,1 3,5,6,7,8,1<br>9,20,21,24 8,22,23 | 3 P19223,P35280,P36374                                    |
| 2047 | 1,2,4,17,1 3,5,6,7,8,1<br>9,20,22,23 8,21,24 | 1 P10758                                                  |

|      |                                              |                                             |
|------|----------------------------------------------|---------------------------------------------|
| 2048 | 1,2,4,17,1 3,5,6,7,8,1<br>9,20,22,24 8,21,23 | 1 D3ZUC6                                    |
| 2049 | 1,2,4,17,1 3,5,6,7,8,1<br>9,20,23,24 8,21,22 | 4 P08937,P10758,P35280,Q9QYP1               |
| 2050 | 1,2,4,17,1 3,5,6,7,8,1<br>9,21,22,23 8,20,24 | 1 Q9R168                                    |
| 2051 | 1,2,4,17,1 3,5,6,7,8,1<br>9,21,22,24 8,20,23 | 2 D3ZUC6,Q9R168                             |
| 2052 | 1,2,4,17,1 3,5,6,7,8,1<br>9,21,23,24 8,20,22 | 3 P35280,Q63474,Q9R168                      |
| 2053 | 1,2,4,17,1 3,5,6,7,8,1<br>9,22,23,24 8,20,21 | 6 D3ZUC6,P00507,P06760,P08937,P47967,Q9R168 |
| 2054 | 1,2,4,17,2 3,5,6,7,8,1<br>0,21,22,23 8,19,24 | 1 P19223                                    |
| 2055 | 1,2,4,17,2 3,5,6,7,8,1<br>0,21,22,24 8,19,23 | 1 P19223                                    |
| 2056 | 1,2,4,17,2 3,5,6,7,8,1<br>0,21,23,24 8,19,22 | 4 P08937,P19223,P35280,Q9QYP1               |
| 2057 | 1,2,4,17,2 3,5,6,7,8,1<br>0,22,23,24 8,19,21 | 6 D3ZUC6,P06760,P08937,P47967,Q63751,Q9QYP1 |
| 2058 | 1,2,4,17,2 3,5,6,7,8,1<br>1,22,23,24 8,19,20 | 5 D3ZUC6,P08937,P47967,Q5I0D1,Q9R168        |
| 2059 | 1,2,4,18,1 3,5,6,7,8,1<br>9,20,21,22 7,23,24 | 0                                           |
| 2060 | 1,2,4,18,1 3,5,6,7,8,1<br>9,20,21,23 7,22,24 | 3 P06866,P10758,P35280                      |
| 2061 | 1,2,4,18,1 3,5,6,7,8,1<br>9,20,21,24 7,22,23 | 3 P35280,P50115,Q68G31                      |
| 2062 | 1,2,4,18,1 3,5,6,7,8,1<br>9,20,22,23 7,21,24 | 4 P04762,P10758,Q6AY61,Q9EQS0               |
| 2063 | 1,2,4,18,1 3,5,6,7,8,1<br>9,20,22,24 7,21,23 | 2 P50115,Q9QX74                             |
| 2064 | 1,2,4,18,1 3,5,6,7,8,1<br>9,20,23,24 7,21,22 | 4 P10758,P35280,P50115,Q9QYP1               |
| 2065 | 1,2,4,18,1 3,5,6,7,8,1<br>9,21,22,23 7,20,24 | 2 P06866,P13676                             |
| 2066 | 1,2,4,18,1 3,5,6,7,8,1<br>9,21,22,24 7,20,23 | 1 P50115                                    |
| 2067 | 1,2,4,18,1 3,5,6,7,8,1<br>9,21,23,24 7,20,22 | 3 O70417,P06866,P35280                      |

|      |                          |                               |    |                                                                                                                                                         |
|------|--------------------------|-------------------------------|----|---------------------------------------------------------------------------------------------------------------------------------------------------------|
| 2068 | 1,2,4,18,1<br>9,22,23,24 | 3,5,6,7,8,1<br>7,20,21        | 9  | D3ZUC6,P00507,P06760,P13676,P26772,P50115,Q9EQS0,Q9QX74,Q9WTT6                                                                                          |
| 2069 | 1,2,4,18,2<br>0,21,22,23 | 3,5,6,7,8,1<br>7,19,24        | 2  | P50115,P54921                                                                                                                                           |
| 2070 | 1,2,4,18,2<br>0,21,22,24 | 3,5,6,7,8,1<br>7,19,23        | 1  | P50115                                                                                                                                                  |
| 2071 | 1,2,4,18,2<br>0,21,23,24 | 3,5,6,7,8,1<br>7,19,22        | 3  | P35280,P50115,Q9QYP1                                                                                                                                    |
| 2072 | 1,2,4,18,2<br>0,22,23,24 | 3,5,6,7,8,1<br>7,19,21        | 8  | D3ZUC6,P06760,P08937,P50115,Q5QE79,Q9EQS0,Q9QX74,Q9QYP1                                                                                                 |
| 2073 | 1,2,4,18,2<br>1,22,23,24 | 3,5,6,7,8,1<br>7,19,20        | 4  | D3ZUC6,P13676,P50115,Q9WTT6                                                                                                                             |
| 2074 | 1,2,4,19,2<br>0,21,22,23 | 3,5,6,7,8,1<br>7,18,24        | 1  | P10758                                                                                                                                                  |
| 2075 | 1,2,4,19,2<br>0,21,22,24 | 3,5,6,7,8,1<br>7,18,23        | 1  | O70594                                                                                                                                                  |
| 2076 | 1,2,4,19,2<br>0,21,23,24 | 3,5,6,7,8,1<br>7,18,22        | 3  | P10758,P35280,Q9QYP1                                                                                                                                    |
| 2077 | 1,2,4,19,2<br>0,22,23,24 | 3,5,6,7,8,1<br>7,18,21        | 6  | P06760,P08937,P10758,P26772,Q9QX74,Q9QYP1                                                                                                               |
| 2078 | 1,2,4,19,2<br>1,22,23,24 | 3,5,6,7,8,1<br>7,18,20        | 3  | O70417,P13676,Q9R168                                                                                                                                    |
| 2079 | 1,2,4,20,2<br>1,22,23,24 | 3,5,6,7,8,1<br>7,18,19        | 3  | P50115,Q9QX74,Q9QYP1                                                                                                                                    |
| 2080 | 1,2,5,6,7,8<br>,17,18    | 3,4,19,20,<br>21,22,23,2<br>4 | 10 | iRT-Kit_WR_fusion,O70594,P00762,P13432,P31044,P50115,P50116,P52590,Q64335,Q91ZS3                                                                        |
| 2081 | 1,2,5,6,7,8<br>,17,19    | 3,4,18,20,<br>21,22,23,2<br>4 | 9  | iRT-Kit_WR_fusion,O70594,P00762,P31044,P50115,P50116,P52590,Q66H69,Q8CJD3                                                                               |
| 2082 | 1,2,5,6,7,8<br>,17,20    | 3,4,18,19,<br>21,22,23,2<br>4 | 19 | D4A5U3,iRT-<br>Kit_WR_fusion,P06911,P12020,P13432,P19629,P25031,P31044,P36375,P50115,P50116,P50280,<br>P52590,P55091,Q4G075,Q5GRG2,Q6IG05,Q91ZS3,Q9JHB9 |
| 2083 | 1,2,5,6,7,8<br>,17,21    | 3,4,18,19,<br>20,22,23,2<br>4 | 14 | iRT-<br>Kit_WR_fusion,O70594,P02631,P05539,P06760,P19629,P36860,P50115,P50116,P52590,Q00715,<br>Q63474,Q6IG05,Q9QX74                                    |
| 2084 | 1,2,5,6,7,8<br>,17,22    | 3,4,18,19,<br>20,21,23,2<br>4 | 7  | iRT-Kit_WR_fusion,O54858,P00762,P23593,P50115,P50116,P52590                                                                                             |

|      |                       |                               |                                                                                                                                                                                                   |
|------|-----------------------|-------------------------------|---------------------------------------------------------------------------------------------------------------------------------------------------------------------------------------------------|
| 2085 | 1,2,5,6,7,8<br>,17,23 | 3,4,18,19,<br>20,21,22,2<br>4 | 9 iRT-Kit_WR_fusion,O54858,O70594,P00762,P19132,P50115,P50116,P52590,Q6IG05                                                                                                                       |
| 2086 | 1,2,5,6,7,8<br>,17,24 | 3,4,18,19,<br>20,21,22,2<br>3 | 8 iRT-Kit_WR_fusion,P01039,P36860,P50115,P50116,P52590,Q63474,Q6AY61                                                                                                                              |
| 2087 | 1,2,5,6,7,8<br>,18,19 | 3,4,17,20,<br>21,22,23,2<br>4 | 8 iRT-Kit_WR_fusion,P00762,P31044,P50115,P50116,P52590,Q66H69,Q91ZS3                                                                                                                              |
| 2088 | 1,2,5,6,7,8<br>,18,20 | 3,4,17,19,<br>21,22,23,2<br>4 | iRT-<br>17 Kit_WR_fusion,O54715,P06911,P12020,P19629,P25031,P31044,P50116,P50280,P52590,P69897,<br>Q03191,Q4G075,Q5GRG2,Q6IG05,Q91ZS3,Q9JHB9                                                      |
| 2089 | 1,2,5,6,7,8<br>,18,21 | 3,4,17,19,<br>20,22,23,2<br>4 | 10 iRT-Kit_WR_fusion,P02631,P19629,P31044,P36860,P50116,P52590,Q00715,Q91ZS3,Q9JJ50                                                                                                               |
| 2090 | 1,2,5,6,7,8<br>,18,22 | 3,4,17,19,<br>20,21,23,2<br>4 | 6 iRT-Kit_WR_fusion,O54858,P00762,P16636,P23593,Q91ZS3                                                                                                                                            |
| 2091 | 1,2,5,6,7,8<br>,18,23 | 3,4,17,19,<br>20,21,22,2<br>4 | iRT-<br>13 Kit_WR_fusion,O54858,O70594,P00762,P16636,P19132,P23785,P31044,P50116,Q03191,Q91ZS<br>3,Q99MH3,Q9JJ50                                                                                  |
| 2092 | 1,2,5,6,7,8<br>,18,24 | 3,4,17,19,<br>20,21,22,2<br>3 | 5 iRT-Kit_WR_fusion,O54858,P36860,Q91ZS3,Q9JJ50                                                                                                                                                   |
| 2093 | 1,2,5,6,7,8<br>,19,20 | 3,4,17,18,<br>21,22,23,2<br>4 | iRT-<br>22 Kit_WR_fusion,P02780,P06911,P0DP29,P0DP30,P0DP31,P12020,P19218,P19629,P25031,P31044<br>,P50115,P50116,P50280,P52590,Q4G075,Q5GRG2,Q5I0D1,Q66H69,Q68G31,Q6IG05,Q8CJD3,Q<br>91ZS3,Q9JI85 |
| 2094 | 1,2,5,6,7,8<br>,19,21 | 3,4,17,18,<br>20,22,23,2<br>4 | iRT-<br>14 Kit_WR_fusion,P02631,P06760,P19629,P31044,P35952,P50115,P50116,P52590,Q00715,Q63474,<br>Q66H69,Q6IG05,Q9JI85                                                                           |
| 2095 | 1,2,5,6,7,8<br>,19,22 | 3,4,17,18,<br>20,21,23,2<br>4 | 7 iRT-Kit_WR_fusion,O54858,P00762,P19218,P50115,P52590,Q4FZU4                                                                                                                                     |
| 2096 | 1,2,5,6,7,8<br>,19,23 | 3,4,17,18,<br>20,21,22,2<br>4 | 10 iRT-Kit_WR_fusion,O54858,P00762,P19629,P31044,P50115,P50116,P52590,Q6IG05,Q8CJD3                                                                                                               |
| 2097 | 1,2,5,6,7,8<br>,19,24 | 3,4,17,18,<br>20,21,22,2<br>3 | 7 iRT-Kit_WR_fusion,O54858,P50115,P50116,P52590,Q66H69,Q68G31                                                                                                                                     |



|      |                        |                               |                                                                                                                                                                                                                 |
|------|------------------------|-------------------------------|-----------------------------------------------------------------------------------------------------------------------------------------------------------------------------------------------------------------|
| 2098 | 1,2,5,6,7,8<br>,20,21  | 3,4,17,18,<br>19,22,23,2<br>4 | iRT-<br>26 Kit_WR_fusion,P01835,P02631,P02780,P06760,P06911,P12020,P19629,P25031,P31044,P35952,<br>P36375,P47967,P50116,P50280,P52590,Q00715,Q4G075,Q5GRG2,Q5I0J9,Q6IG05,Q78P75,Q81<br>2E4,Q91ZS3,Q9JHB9,Q9JJ85 |
| 2099 | 1,2,5,6,7,8<br>,20,22  | 3,4,17,18,<br>19,21,23,2<br>4 | iRT-<br>14 Kit_WR_fusion,O54858,P06911,P12020,P19218,P19629,P25031,P31044,P50116,P50280,Q03191,<br>Q4G075,Q5GRG2,Q91ZS3                                                                                         |
| 2100 | 1,2,5,6,7,8<br>,20,23  | 3,4,17,18,<br>19,21,22,2<br>4 | iRT-<br>17 Kit_WR_fusion,O54858,P06911,P12020,P19132,P19629,P23739,P25031,P31044,P50116,P50280,<br>Q03191,Q4G075,Q5GRG2,Q6IG05,Q91ZS3,Q99MH3                                                                    |
| 2101 | 1,2,5,6,7,8<br>,20,24  | 3,4,17,18,<br>19,21,22,2<br>3 | iRT-<br>12 Kit_WR_fusion,P06911,P12020,P19629,P25031,P31044,P50116,P50280,Q5GRG2,Q6IG05,Q91ZS<br>3,Q9JHB9                                                                                                       |
| 2102 | 1,2,5,6,7,8<br>,21,22  | 3,4,17,18,<br>19,20,23,2<br>4 | 9 iRT-Kit_WR_fusion,O54858,P01835,P02631,P19629,P36860,P50116,Q62714,Q91ZS3                                                                                                                                     |
| 2103 | 1,2,5,6,7,8<br>,21,23  | 3,4,17,18,<br>19,20,22,2<br>4 | iRT-<br>16 Kit_WR_fusion,O54858,P01835,P02631,P19132,P19629,P36860,P50115,P50116,P52590,Q62714,<br>Q63474,Q63532,Q6IG05,Q91ZS3,Q9JJ50                                                                           |
| 2104 | 1,2,5,6,7,8<br>,21,24  | 3,4,17,18,<br>19,20,22,2<br>3 | iRT-<br>12 Kit_WR_fusion,O54858,P01835,P02631,P19629,P30919,P36860,P50116,Q62714,Q63474,Q91ZS<br>3,Q9JJ50                                                                                                       |
| 2105 | 1,2,5,6,7,8<br>,22,23  | 3,4,17,18,<br>19,20,21,2<br>4 | 10 iRT-Kit_WR_fusion,O54858,P19629,P23593,P50115,Q09030,Q62714,Q63532,Q6P6R2,Q99MH3                                                                                                                             |
| 2106 | 1,2,5,6,7,8<br>,22,24  | 3,4,17,18,<br>19,20,21,2<br>3 | 5 iRT-Kit_WR_fusion,O54858,P23593,Q62714,Q6P6R2                                                                                                                                                                 |
| 2107 | 1,2,5,6,7,8<br>,23,24  | 3,4,17,18,<br>19,20,21,2<br>2 | 6 iRT-Kit_WR_fusion,O54858,P36860,Q62714,Q6P6R2,Q9JJ50                                                                                                                                                          |
| 2108 | 1,2,5,6,7,1<br>7,18,19 | 3,4,8,20,2<br>1,22,23,24      | 3 P00762,P50116,P52590                                                                                                                                                                                          |
| 2109 | 1,2,5,6,7,1<br>7,18,20 | 3,4,8,19,2<br>1,22,23,24      | 6 P00762,P50116,P55091,Q03191,Q5GRG2,Q9Z0J6                                                                                                                                                                     |
| 2110 | 1,2,5,6,7,1<br>7,18,21 | 3,4,8,19,2<br>0,22,23,24      | 5 P00762,P01835,P05539,P36860,P50116                                                                                                                                                                            |
| 2111 | 1,2,5,6,7,1<br>7,18,22 | 3,4,8,19,2<br>0,21,23,24      | 3 P00762,Q64335,Q9EQS0                                                                                                                                                                                          |
| 2112 | 1,2,5,6,7,1<br>7,18,23 | 3,4,8,19,2<br>0,21,22,24      | 7 O70594,P00762,P16636,P19814,Q03191,Q9EQS0,Q9JJ50                                                                                                                                                              |

|      |                        |                          |   |                                                                              |
|------|------------------------|--------------------------|---|------------------------------------------------------------------------------|
| 2113 | 1,2,5,6,7,1<br>7,18,24 | 3,4,8,19,2<br>0,21,22,23 | 4 | P00762,P01039,P36860,Q6AY61                                                  |
| 2114 | 1,2,5,6,7,1<br>7,19,20 | 3,4,8,18,2<br>1,22,23,24 | 4 | P00762,P0DP29;P0DP30;P0DP31,P50116,P52590                                    |
| 2115 | 1,2,5,6,7,1<br>7,19,21 | 3,4,8,18,2<br>0,22,23,24 | 7 | P00762,P05539,P36860,P50116,P52590,Q6AY61,Q9R168                             |
| 2116 | 1,2,5,6,7,1<br>7,19,22 | 3,4,8,18,2<br>0,21,23,24 | 3 | P00762,P52590,Q9R168                                                         |
| 2117 | 1,2,5,6,7,1<br>7,19,23 | 3,4,8,18,2<br>0,21,22,24 | 4 | P00762,P50116,P52590,Q8CJD3                                                  |
| 2118 | 1,2,5,6,7,1<br>7,19,24 | 3,4,8,18,2<br>0,21,22,23 | 5 | P00762,P01039,P52590,P54921,Q6AY61                                           |
| 2119 | 1,2,5,6,7,1<br>7,20,21 | 3,4,8,18,1<br>9,22,23,24 | 9 | P01835,P05539,P0DP29;P0DP30;P0DP31,P36860,P50116,P63029,Q5I0J9,Q6AY61,Q9Z0J6 |
| 2120 | 1,2,5,6,7,1<br>7,20,22 | 3,4,8,18,1<br>9,21,23,24 | 4 | P00762,P50116,Q03191,Q9Z0J6                                                  |
| 2121 | 1,2,5,6,7,1<br>7,20,23 | 3,4,8,18,1<br>9,21,22,24 | 3 | P00762,P50116,Q03191                                                         |
| 2122 | 1,2,5,6,7,1<br>7,20,24 | 3,4,8,18,1<br>9,21,22,23 | 5 | P00762,P01039,P50116,Q6AY61,Q9Z0J6                                           |
| 2123 | 1,2,5,6,7,1<br>7,21,22 | 3,4,8,18,1<br>9,20,23,24 | 6 | P00762,P01835,P05539,P36860,P50116,Q9R168                                    |
| 2124 | 1,2,5,6,7,1<br>7,21,23 | 3,4,8,18,1<br>9,20,22,24 | 9 | P00762,P01835,P05539,P19814,P36860,P50116,Q63474,Q9JJ50,Q9R168               |
| 2125 | 1,2,5,6,7,1<br>7,21,24 | 3,4,8,18,1<br>9,20,22,23 | 9 | P00762,P01039,P01835,P05539,P36860,P50116,Q63474,Q6AY61,Q9R168               |
| 2126 | 1,2,5,6,7,1<br>7,22,23 | 3,4,8,18,1<br>9,20,21,24 | 3 | P00762,Q9EQS0,Q9R168                                                         |
| 2127 | 1,2,5,6,7,1<br>7,22,24 | 3,4,8,18,1<br>9,20,21,23 | 4 | P00762,P01039,P36860,Q9R168                                                  |
| 2128 | 1,2,5,6,7,1<br>7,23,24 | 3,4,8,18,1<br>9,20,21,22 | 4 | P00762,P01039,P36860,Q6AY61                                                  |
| 2129 | 1,2,5,6,7,1<br>8,19,20 | 3,4,8,17,2<br>1,22,23,24 | 3 | P00762,P0DP29;P0DP30;P0DP31,P52590                                           |
| 2130 | 1,2,5,6,7,1<br>8,19,21 | 3,4,8,17,2<br>0,22,23,24 | 4 | P00762,P01835,P52590,Q00715                                                  |
| 2131 | 1,2,5,6,7,1<br>8,19,22 | 3,4,8,17,2<br>0,21,23,24 | 3 | P00762,P52590,Q9EQS0                                                         |
| 2132 | 1,2,5,6,7,1<br>8,19,23 | 3,4,8,17,2<br>0,21,22,24 | 4 | P00762,P52590,Q9EQS0,Q9JJ50                                                  |

|      |                        |                          |    |                                                                                     |
|------|------------------------|--------------------------|----|-------------------------------------------------------------------------------------|
| 2133 | 1,2,5,6,7,1<br>8,19,24 | 3,4,8,17,2<br>0,21,22,23 | 2  | P00762,P52590                                                                       |
| 2134 | 1,2,5,6,7,1<br>8,20,21 | 3,4,8,17,1<br>9,22,23,24 | 6  | P00762,P01835,P47967,Q00715,Q03191,Q91ZS3                                           |
| 2135 | 1,2,5,6,7,1<br>8,20,22 | 3,4,8,17,1<br>9,21,23,24 | 4  | P00762,P01835,Q03191,Q9EQS0                                                         |
| 2136 | 1,2,5,6,7,1<br>8,20,23 | 3,4,8,17,1<br>9,21,22,24 | 6  | P00762,P01835,P16636,Q03191,Q9EQS0,Q9JJ50                                           |
| 2137 | 1,2,5,6,7,1<br>8,20,24 | 3,4,8,17,1<br>9,21,22,23 | 3  | P00762,P01835,Q03191                                                                |
| 2138 | 1,2,5,6,7,1<br>8,21,22 | 3,4,8,17,1<br>9,20,23,24 | 4  | P00762,P01835,P36860,Q03191                                                         |
| 2139 | 1,2,5,6,7,1<br>8,21,23 | 3,4,8,17,1<br>9,20,22,24 | 8  | O70417,P00762,P01835,P16636,P19814,P36860,Q03191,Q9JJ50                             |
| 2140 | 1,2,5,6,7,1<br>8,21,24 | 3,4,8,17,1<br>9,20,22,23 | 5  | P00762,P01835,P36860,Q6AY61,Q9JJ50                                                  |
| 2141 | 1,2,5,6,7,1<br>8,22,23 | 3,4,8,17,1<br>9,20,21,24 | 12 | P00762,P01835,P13676,P16636,P30120,P36374,Q03191,Q6P6R2,Q99MH3,Q9EQS0,Q9WVK7,Q9Z2L0 |
| 2142 | 1,2,5,6,7,1<br>8,22,24 | 3,4,8,17,1<br>9,20,21,23 | 6  | P00762,P01835,Q03191,Q6P6R2,Q9EQS0,Q9WVK7                                           |
| 2143 | 1,2,5,6,7,1<br>8,23,24 | 3,4,8,17,1<br>9,20,21,22 | 8  | P00762,P01835,P16636,Q03191,Q6P6R2,Q9EQS0,Q9JJ50,Q9WVK7                             |
| 2144 | 1,2,5,6,7,1<br>9,20,21 | 3,4,8,17,1<br>8,22,23,24 | 9  | P00762,P01835,P0DP29;P0DP30;P0DP31,P47967,P50116,P52590,Q5I0D1,Q5I0J9,Q63617        |
| 2145 | 1,2,5,6,7,1<br>9,20,22 | 3,4,8,17,1<br>8,21,23,24 | 3  | P00762,P19218,P52590                                                                |
| 2146 | 1,2,5,6,7,1<br>9,20,23 | 3,4,8,17,1<br>8,21,22,24 | 4  | P00762,P23739,P52590,Q8CJD3                                                         |
| 2147 | 1,2,5,6,7,1<br>9,20,24 | 3,4,8,17,1<br>8,21,22,23 | 3  | P00762,P52590,Q68G31                                                                |
| 2148 | 1,2,5,6,7,1<br>9,21,22 | 3,4,8,17,1<br>8,20,23,24 | 4  | P00762,P01835,P52590,Q9R168                                                         |
| 2149 | 1,2,5,6,7,1<br>9,21,23 | 3,4,8,17,1<br>8,20,22,24 | 6  | O70417,P00762,P01835,P14173,P52590,Q9JJ50                                           |
| 2150 | 1,2,5,6,7,1<br>9,21,24 | 3,4,8,17,1<br>8,20,22,23 | 7  | P00762,P01835,P14173,P36860,P52590,Q63474,Q6AY61                                    |
| 2151 | 1,2,5,6,7,1<br>9,22,23 | 3,4,8,17,1<br>8,20,21,24 | 4  | P00762,P52590,Q811M5,Q9EQS0                                                         |
| 2152 | 1,2,5,6,7,1<br>9,22,24 | 3,4,8,17,1<br>8,20,21,23 | 2  | P00762,P52590                                                                       |

|      |                        |                          |   |                                                         |
|------|------------------------|--------------------------|---|---------------------------------------------------------|
| 2153 | 1,2,5,6,7,1<br>9,23,24 | 3,4,8,17,1<br>8,20,21,22 | 4 | P00762,P14173,P52590,Q9JJ50                             |
| 2154 | 1,2,5,6,7,2<br>0,21,22 | 3,4,8,17,1<br>8,19,23,24 | 4 | P01835,Q03191,Q5I0J9,Q5PQL7                             |
| 2155 | 1,2,5,6,7,2<br>0,21,23 | 3,4,8,17,1<br>8,19,22,24 | 4 | P01835,P19629,P50116,Q03191                             |
| 2156 | 1,2,5,6,7,2<br>0,21,24 | 3,4,8,17,1<br>8,19,22,23 | 3 | P01835,P36860,Q6AY61                                    |
| 2157 | 1,2,5,6,7,2<br>0,22,23 | 3,4,8,17,1<br>8,19,21,24 | 5 | P00762,P01835,Q03191,Q99MH3,Q9EQS0                      |
| 2158 | 1,2,5,6,7,2<br>0,22,24 | 3,4,8,17,1<br>8,19,21,23 | 4 | P00762,P01835,Q03191,Q6P6R2                             |
| 2159 | 1,2,5,6,7,2<br>0,23,24 | 3,4,8,17,1<br>8,19,21,22 | 4 | P00762,P01835,P23739,Q03191                             |
| 2160 | 1,2,5,6,7,2<br>1,22,23 | 3,4,8,17,1<br>8,19,20,24 | 7 | P00762,P01835,P36860,Q03191,Q62714,Q9EQS0,Q9R168        |
| 2161 | 1,2,5,6,7,2<br>1,22,24 | 3,4,8,17,1<br>8,19,20,23 | 5 | P00762,P01835,P36860,Q62714,Q9R168                      |
| 2162 | 1,2,5,6,7,2<br>1,23,24 | 3,4,8,17,1<br>8,19,20,22 | 7 | O70417,P00762,P01835,P36860,Q62714,Q63474,Q9JJ50        |
| 2163 | 1,2,5,6,7,2<br>2,23,24 | 3,4,8,17,1<br>8,19,20,21 | 8 | P00762,P01835,P13676,Q03191,Q62714,Q6P6R2,Q9EQS0,Q9WVK7 |
| 2164 | 1,2,5,6,8,1<br>7,18,19 | 3,4,7,20,2<br>1,22,23,24 | 4 | P00762,P13432,P52590,Q68G31                             |
| 2165 | 1,2,5,6,8,1<br>7,18,20 | 3,4,7,19,2<br>1,22,23,24 | 8 | P06911,P12020,P13432,P36375,P55091,P63029,Q5GRG2,Q91ZS3 |
| 2166 | 1,2,5,6,8,1<br>7,18,21 | 3,4,7,19,2<br>0,22,23,24 | 2 | P13432,P36860                                           |
| 2167 | 1,2,5,6,8,1<br>7,18,22 | 3,4,7,19,2<br>0,21,23,24 | 1 | P13432                                                  |
| 2168 | 1,2,5,6,8,1<br>7,18,23 | 3,4,7,19,2<br>0,21,22,24 | 5 | P16636,P19132,P19814,P23785,Q99MH3                      |
| 2169 | 1,2,5,6,8,1<br>7,18,24 | 3,4,7,19,2<br>0,21,22,23 | 2 | P01039,P13432                                           |
| 2170 | 1,2,5,6,8,1<br>7,19,20 | 3,4,7,18,2<br>1,22,23,24 | 8 | O89117,P52590,P63029,Q5GRG2,Q5I0J9,Q68G31,Q6IG05,Q8CJD3 |
| 2171 | 1,2,5,6,8,1<br>7,19,21 | 3,4,7,18,2<br>0,22,23,24 | 4 | P52590,Q63474,Q66H69,Q68G31                             |
| 2172 | 1,2,5,6,8,1<br>7,19,22 | 3,4,7,18,2<br>0,21,23,24 | 3 | O89117,P00507,P52590                                    |

|      |                        |                          |    |                                                                       |
|------|------------------------|--------------------------|----|-----------------------------------------------------------------------|
| 2173 | 1,2,5,6,8,1<br>7,19,23 | 3,4,7,18,2<br>0,21,22,24 | 2  | P52590,Q8CJD3                                                         |
| 2174 | 1,2,5,6,8,1<br>7,19,24 | 3,4,7,18,2<br>0,21,22,23 | 4  | P01039,P52590,P97840,Q68G31                                           |
| 2175 | 1,2,5,6,8,1<br>7,20,21 | 3,4,7,18,1<br>9,22,23,24 | 6  | P25809,P36375,P63029,Q5GRG2,Q5I0J9,Q6IG05                             |
| 2176 | 1,2,5,6,8,1<br>7,20,22 | 3,4,7,18,1<br>9,21,23,24 | 6  | O89117,P06911,P12020,P63029,Q5GRG2,Q5I0J9                             |
| 2177 | 1,2,5,6,8,1<br>7,20,23 | 3,4,7,18,1<br>9,21,22,24 | 10 | P17559,P19132,P23739,P25031,P36375,P36376,P63029,Q5GRG2,Q6IG05,Q99MH3 |
| 2178 | 1,2,5,6,8,1<br>7,20,24 | 3,4,7,18,1<br>9,21,22,23 | 7  | P01039,P06911,P36375,P63029,Q5GRG2,Q5I0J9,Q68G31                      |
| 2179 | 1,2,5,6,8,1<br>7,21,22 | 3,4,7,18,1<br>9,20,23,24 | 1  | P10758                                                                |
| 2180 | 1,2,5,6,8,1<br>7,21,23 | 3,4,7,18,1<br>9,20,22,24 | 4  | P19132,P19814,P36860,Q63474                                           |
| 2181 | 1,2,5,6,8,1<br>7,21,24 | 3,4,7,18,1<br>9,20,22,23 | 4  | P01039,P36860,P97840,Q63474                                           |
| 2182 | 1,2,5,6,8,1<br>7,22,23 | 3,4,7,18,1<br>9,20,21,24 | 5  | O54858,P00507,P97840,Q63532,Q99MH3                                    |
| 2183 | 1,2,5,6,8,1<br>7,22,24 | 3,4,7,18,1<br>9,20,21,23 | 3  | P01039,P10758,P97840                                                  |
| 2184 | 1,2,5,6,8,1<br>7,23,24 | 3,4,7,18,1<br>9,20,21,22 | 2  | P01039,P97840                                                         |
| 2185 | 1,2,5,6,8,1<br>8,19,20 | 3,4,7,17,2<br>1,22,23,24 | 6  | P12020,P50280,P52590,Q5GRG2,Q68G31,Q91ZS3                             |
| 2186 | 1,2,5,6,8,1<br>8,19,21 | 3,4,7,17,2<br>0,22,23,24 | 3  | P52590,Q66H69,Q68G31                                                  |
| 2187 | 1,2,5,6,8,1<br>8,19,22 | 3,4,7,17,2<br>0,21,23,24 | 2  | P15399,P52590                                                         |
| 2188 | 1,2,5,6,8,1<br>8,19,23 | 3,4,7,17,2<br>0,21,22,24 | 3  | P52590,Q99MH3,Q9JJ50                                                  |
| 2189 | 1,2,5,6,8,1<br>8,19,24 | 3,4,7,17,2<br>0,21,22,23 | 2  | P52590,Q68G31                                                         |
| 2190 | 1,2,5,6,8,1<br>8,20,21 | 3,4,7,17,1<br>9,22,23,24 | 9  | P02631,P19629,P25809,P36375,Q00715,Q5GRG2,Q5I0J9,Q68G31,Q91ZS3        |
| 2191 | 1,2,5,6,8,1<br>8,20,22 | 3,4,7,17,1<br>9,21,23,24 | 4  | P12020,P15399,Q5GRG2,Q91ZS3                                           |
| 2192 | 1,2,5,6,8,1<br>8,20,23 | 3,4,7,17,1<br>9,21,22,24 | 6  | P16636,P19132,P25031,Q5GRG2,Q91ZS3,Q99MH3                             |

|      |                        |                          |   |                                                         |
|------|------------------------|--------------------------|---|---------------------------------------------------------|
| 2193 | 1,2,5,6,8,1<br>8,20,24 | 3,4,7,17,1<br>9,21,22,23 | 4 | P12020,Q5GRG2,Q68G31,Q91ZS3                             |
| 2194 | 1,2,5,6,8,1<br>8,21,22 | 3,4,7,17,1<br>9,20,23,24 | 1 | Q91ZS3                                                  |
| 2195 | 1,2,5,6,8,1<br>8,21,23 | 3,4,7,17,1<br>9,20,22,24 | 8 | P16636,P19132,P19814,P54921,Q63532,Q91ZS3,Q99MH3,Q9JJ50 |
| 2196 | 1,2,5,6,8,1<br>8,21,24 | 3,4,7,17,1<br>9,20,22,23 | 4 | P36860,Q68G31,Q91ZS3,Q9JJ50                             |
| 2197 | 1,2,5,6,8,1<br>8,22,23 | 3,4,7,17,1<br>9,20,21,24 | 7 | O54858,P00507,P16636,P54921,Q63532,Q99MH3,Q9Z2L0        |
| 2198 | 1,2,5,6,8,1<br>8,22,24 | 3,4,7,17,1<br>9,20,21,23 | 3 | O54858,P20646,Q6P6R2                                    |
| 2199 | 1,2,5,6,8,1<br>8,23,24 | 3,4,7,17,1<br>9,20,21,22 | 6 | O54858,P16636,P20646,Q6P6R2,Q99MH3,Q9JJ50               |
| 2200 | 1,2,5,6,8,1<br>9,20,21 | 3,4,7,17,1<br>8,22,23,24 | 8 | P19629,P52590,Q5GRG2,Q5I0J9,Q64268,Q68G31,Q6IG05,Q9JI85 |
| 2201 | 1,2,5,6,8,1<br>9,20,22 | 3,4,7,17,1<br>8,21,23,24 | 6 | P15399,P19218,P52590,Q5GRG2,Q5I0J9,Q68G31               |
| 2202 | 1,2,5,6,8,1<br>9,20,23 | 3,4,7,17,1<br>8,21,22,24 | 6 | P23739,P25031,P52590,Q68G31,Q6IG05,Q8CJD3               |
| 2203 | 1,2,5,6,8,1<br>9,20,24 | 3,4,7,17,1<br>8,21,22,23 | 4 | P52590,Q5GRG2,Q5I0J9,Q68G31                             |
| 2204 | 1,2,5,6,8,1<br>9,21,22 | 3,4,7,17,1<br>8,20,23,24 | 3 | P19218,P30919,P52590                                    |
| 2205 | 1,2,5,6,8,1<br>9,21,23 | 3,4,7,17,1<br>8,20,22,24 | 3 | P52590,Q63474,Q8CJD3                                    |
| 2206 | 1,2,5,6,8,1<br>9,21,24 | 3,4,7,17,1<br>8,20,22,23 | 4 | P30919,P52590,Q63474,Q68G31                             |
| 2207 | 1,2,5,6,8,1<br>9,22,23 | 3,4,7,17,1<br>8,20,21,24 | 8 | O54858,P00507,P19218,P52590,Q63532,Q811M5,Q8CJD3,Q99MH3 |
| 2208 | 1,2,5,6,8,1<br>9,22,24 | 3,4,7,17,1<br>8,20,21,23 | 5 | P00507,P15399,P30919,P52590,Q68G31                      |
| 2209 | 1,2,5,6,8,1<br>9,23,24 | 3,4,7,17,1<br>8,20,21,22 | 3 | P00507,P52590,Q68G31                                    |
| 2210 | 1,2,5,6,8,2<br>0,21,22 | 3,4,7,17,1<br>8,19,23,24 | 4 | F1M3L7,P19629,Q5I0J9,Q91ZS3                             |
| 2211 | 1,2,5,6,8,2<br>0,21,23 | 3,4,7,17,1<br>8,19,22,24 | 7 | P19132,P19629,P23739,P25031,P36375,Q6IG05,Q91ZS3        |
| 2212 | 1,2,5,6,8,2<br>0,21,24 | 3,4,7,17,1<br>8,19,22,23 | 5 | P36375,Q5GRG2,Q5I0J9,Q68G31,Q91ZS3                      |

|      |                         |                          |    |                                                                                            |
|------|-------------------------|--------------------------|----|--------------------------------------------------------------------------------------------|
| 2213 | 1,2,5,6,8,2<br>0,22,23  | 3,4,7,17,1<br>8,19,21,24 | 5  | P19132,P19218,P23739,P25031,Q99MH3                                                         |
| 2214 | 1,2,5,6,8,2<br>0,22,24  | 3,4,7,17,1<br>8,19,21,23 | 2  | Q5GRG2,Q5I0J9                                                                              |
| 2215 | 1,2,5,6,8,2<br>0,23,24  | 3,4,7,17,1<br>8,19,21,22 | 2  | P23739,Q5QE79                                                                              |
| 2216 | 1,2,5,6,8,2<br>1,22,23  | 3,4,7,17,1<br>8,19,20,24 | 6  | O54858,P30919,P54921,Q62714,Q63532,Q99MH3                                                  |
| 2217 | 1,2,5,6,8,2<br>1,22,24  | 3,4,7,17,1<br>8,19,20,23 | 3  | P30919,P36860,Q62714                                                                       |
| 2218 | 1,2,5,6,8,2<br>1,23,24  | 3,4,7,17,1<br>8,19,20,22 | 6  | P20646,P30919,P36860,Q62714,Q63474,Q9JJ50                                                  |
| 2219 | 1,2,5,6,8,2<br>2,23,24  | 3,4,7,17,1<br>8,19,20,21 | 9  | O54858,P00507,P20646,P30919,P97840,Q62714,Q63532,Q6P6R2,Q99MH3                             |
| 2220 | 1,2,5,6,17,<br>18,19,20 | 3,4,7,8,21,<br>22,23,24  | 5  | P00762,P20761,P35280,P52590,Q5I0J9                                                         |
| 2221 | 1,2,5,6,17,<br>18,19,21 | 3,4,7,8,20,<br>22,23,24  | 5  | O70417,P00762,P05539,P35280,P52590                                                         |
| 2222 | 1,2,5,6,17,<br>18,19,22 | 3,4,7,8,20,<br>21,23,24  | 3  | P00762,P52590,Q9EQS0                                                                       |
| 2223 | 1,2,5,6,17,<br>18,19,23 | 3,4,7,8,20,<br>21,22,24  | 4  | P00762,P35280,P52590,Q9EQS0                                                                |
| 2224 | 1,2,5,6,17,<br>18,19,24 | 3,4,7,8,20,<br>21,22,23  | 4  | P00762,P01039,P35280,P52590                                                                |
| 2225 | 1,2,5,6,17,<br>18,20,21 | 3,4,7,8,19,<br>22,23,24  | 4  | P20761,P35280,P63029,Q5I0J9                                                                |
| 2226 | 1,2,5,6,17,<br>18,20,22 | 3,4,7,8,19,<br>21,23,24  | 2  | P00762,Q9Z0J6                                                                              |
| 2227 | 1,2,5,6,17,<br>18,20,23 | 3,4,7,8,19,<br>21,22,24  | 5  | P00762,P04355,P16636,P35280,P63029                                                         |
| 2228 | 1,2,5,6,17,<br>18,20,24 | 3,4,7,8,19,<br>21,22,23  | 3  | P00762,P01039,P35280                                                                       |
| 2229 | 1,2,5,6,17,<br>18,21,22 | 3,4,7,8,19,<br>20,23,24  | 3  | P00762,P05539,P10758                                                                       |
| 2230 | 1,2,5,6,17,<br>18,21,23 | 3,4,7,8,19,<br>20,22,24  | 7  | O70417,P00762,P16636,P19814,P35280,P36860,Q9JJ50                                           |
| 2231 | 1,2,5,6,17,<br>18,21,24 | 3,4,7,8,19,<br>20,22,23  | 7  | O70417,P01039,P10758,P35280,P36860,Q4G075,Q6AY61                                           |
| 2232 | 1,2,5,6,17,<br>18,22,23 | 3,4,7,8,19,<br>20,21,24  | 13 | P00714,P00762,P08723,P16636,P19814,P22273,P22282,P30120,P36374,Q5M8C6,Q63617,Q99MH3,Q9EQS0 |

|      |                                              |                                                                  |
|------|----------------------------------------------|------------------------------------------------------------------|
| 2233 | 1,2,5,6,17, 3,4,7,8,19,<br>18,22,24 20,21,23 | 7 D3ZUC6,P00762,P01039,P10758,Q63617,Q9EQS0,Q9WTT6               |
| 2234 | 1,2,5,6,17, 3,4,7,8,19,<br>18,23,24 20,21,22 | 9 O70417,P00762,P01039,P16636,P35280,Q63617,Q9EQS0,Q9JJ50,Q9WTT6 |
| 2235 | 1,2,5,6,17, 3,4,7,8,18,<br>19,20,21 22,23,24 | 7 P05539,P20761,P35280,P52590,P63029,Q5I0J9,Q68G31               |
| 2236 | 1,2,5,6,17, 3,4,7,8,18,<br>19,20,22 21,23,24 | 4 O89117,P00762,P52590,Q5I0J9                                    |
| 2237 | 1,2,5,6,17, 3,4,7,8,18,<br>19,20,23 21,22,24 | 7 P00762,P02625,P23739,P35280,P52590,P63029,Q8CJD3               |
| 2238 | 1,2,5,6,17, 3,4,7,8,18,<br>19,20,24 21,22,23 | 6 P00762,P01039,P35280,P52590,Q5I0J9,Q68G31                      |
| 2239 | 1,2,5,6,17, 3,4,7,8,18,<br>19,21,22 20,23,24 | 4 P00762,P05539,P52590,Q9R168                                    |
| 2240 | 1,2,5,6,17, 3,4,7,8,18,<br>19,21,23 20,22,24 | 4 O70417,P00762,P35280,P52590                                    |
| 2241 | 1,2,5,6,17, 3,4,7,8,18,<br>19,21,24 20,22,23 | 9 O70417,P00762,P01039,P05539,P35280,P52590,Q63474,Q68G31,Q6AY61 |
| 2242 | 1,2,5,6,17, 3,4,7,8,18,<br>19,22,23 20,21,24 | 5 P00507,P00762,P22273,P52590,Q9EQS0                             |
| 2243 | 1,2,5,6,17, 3,4,7,8,18,<br>19,22,24 20,21,23 | 5 D3ZUC6,P00507,P00762,P01039,P52590                             |
| 2244 | 1,2,5,6,17, 3,4,7,8,18,<br>19,23,24 20,21,22 | 6 O70417,P00762,P01039,P22273,P35280,P52590                      |
| 2245 | 1,2,5,6,17, 3,4,7,8,18,<br>20,21,22 19,23,24 | 2 P63029,Q5I0J9                                                  |
| 2246 | 1,2,5,6,17, 3,4,7,8,18,<br>20,21,23 19,22,24 | 3 P35280,P63029,Q5I0J9                                           |
| 2247 | 1,2,5,6,17, 3,4,7,8,18,<br>20,21,24 19,22,23 | 6 P01039,P35280,P36860,P63029,Q5I0J9,Q6AY61                      |
| 2248 | 1,2,5,6,17, 3,4,7,8,18,<br>20,22,23 19,21,24 | 5 O89117,P00762,P63029,Q99MH3,Q9EQS0                             |
| 2249 | 1,2,5,6,17, 3,4,7,8,18,<br>20,22,24 19,21,23 | 3 O35077,P01039,Q5I0J9                                           |
| 2250 | 1,2,5,6,17, 3,4,7,8,18,<br>20,23,24 19,21,22 | 4 P01039,P23739,P35280,P63029                                    |
| 2251 | 1,2,5,6,17, 3,4,7,8,18,<br>21,22,23 19,20,24 | 4 O70417,P00762,Q9EQS0,Q9R168                                    |
| 2252 | 1,2,5,6,17, 3,4,7,8,18,<br>21,22,24 19,20,23 | 5 P01039,P05539,P10758,P36860,Q9R168                             |



|      |                                              |    |                                                                                                       |
|------|----------------------------------------------|----|-------------------------------------------------------------------------------------------------------|
| 2253 | 1,2,5,6,17, 3,4,7,8,18,<br>21,23,24 19,20,22 | 5  | O70417,P01039,P35280,P36860,Q63474                                                                    |
| 2254 | 1,2,5,6,17, 3,4,7,8,18,<br>22,23,24 19,20,21 | 14 | D3ZUC6,P00507,P00762,P01039,P02780,P22273,P22282,P47967,P97840,Q5I0D1,Q63617,Q6P6<br>R2,Q9EQS0,Q9WTT6 |
| 2255 | 1,2,5,6,18, 3,4,7,8,17,<br>19,20,21 22,23,24 | 6  | O70417,P35280,P52590,Q5I0J9,Q5PQL7,Q68G31                                                             |
| 2256 | 1,2,5,6,18, 3,4,7,8,17,<br>19,20,22 21,23,24 | 4  | P00762,P52590,Q5PQL7,Q9EQS0                                                                           |
| 2257 | 1,2,5,6,18, 3,4,7,8,17,<br>19,20,23 21,22,24 | 5  | O70417,P00762,P35280,P52590,Q9EQS0                                                                    |
| 2258 | 1,2,5,6,18, 3,4,7,8,17,<br>19,20,24 21,22,23 | 3  | P00762,P35280,Q68G31                                                                                  |
| 2259 | 1,2,5,6,18, 3,4,7,8,17,<br>19,21,22 20,23,24 | 4  | O70417,P00762,P52590,Q5PQL7                                                                           |
| 2260 | 1,2,5,6,18, 3,4,7,8,17,<br>19,21,23 20,22,24 | 5  | O70417,P00762,P35280,P52590,Q9JJ50                                                                    |
| 2261 | 1,2,5,6,18, 3,4,7,8,17,<br>19,21,24 20,22,23 | 5  | O70417,P00762,P35280,Q4G075,Q68G31                                                                    |
| 2262 | 1,2,5,6,18, 3,4,7,8,17,<br>19,22,23 20,21,24 | 8  | O70417,P00507,P00762,P13676,Q5M8C6,Q811M5,Q99MH3,Q9EQS0                                               |
| 2263 | 1,2,5,6,18, 3,4,7,8,17,<br>19,22,24 20,21,23 | 6  | O70417,P00507,P00762,P13676,Q9EQS0,Q9WTT6                                                             |
| 2264 | 1,2,5,6,18, 3,4,7,8,17,<br>19,23,24 20,21,22 | 7  | O70417,P00762,P13676,P35280,Q9EQS0,Q9JJ50,Q9WTT6                                                      |
| 2265 | 1,2,5,6,18, 3,4,7,8,17,<br>20,21,22 19,23,24 | 4  | P01835,Q03191,Q5I0J9,Q5PQL7                                                                           |
| 2266 | 1,2,5,6,18, 3,4,7,8,17,<br>20,21,23 19,22,24 | 5  | O70417,P01835,P35280,Q03191,Q9JJ50                                                                    |
| 2267 | 1,2,5,6,18, 3,4,7,8,17,<br>20,21,24 19,22,23 | 5  | O70417,P01835,P35280,Q5I0J9,Q68G31                                                                    |
| 2268 | 1,2,5,6,18, 3,4,7,8,17,<br>20,22,23 19,21,24 | 9  | P00762,P04355,P16636,P20646,Q03191,Q5QE79,Q99MH3,Q9EQS0,Q9QX74                                        |
| 2269 | 1,2,5,6,18, 3,4,7,8,17,<br>20,22,24 19,21,23 | 4  | P20646,P22006,Q9EQS0,Q9QX74                                                                           |
| 2270 | 1,2,5,6,18, 3,4,7,8,17,<br>20,23,24 19,21,22 | 8  | O70417,P04355,P20646,P35280,Q03191,Q5QE79,Q9EQS0,Q9QX74                                               |
| 2271 | 1,2,5,6,18, 3,4,7,8,17,<br>21,22,23 19,20,24 | 11 | O70417,P00762,P01835,P13676,P16636,P20646,P36374,P54921,Q99MH3,Q9EQS0,Q9WTT6                          |
| 2272 | 1,2,5,6,18, 3,4,7,8,17,<br>21,22,24 19,20,23 | 7  | O70417,P01835,P10758,P13676,P20646,Q4G075,Q9WTT6                                                      |

|      |                                              |    |                                                                                                                                          |
|------|----------------------------------------------|----|------------------------------------------------------------------------------------------------------------------------------------------|
| 2273 | 1,2,5,6,18, 3,4,7,8,17,<br>21,23,24 19,20,22 | 9  | O70417,P01835,P13676,P20646,P35280,P36860,Q4G075,Q9JJ50,Q9WTT6                                                                           |
| 2274 | 1,2,5,6,18, 3,4,7,8,17,<br>22,23,24 19,20,21 | 19 | D4A5U3,O70417,P00507,P00762,P13676,P16636,P20646,P22273,P22282,P36374,Q5QE79,Q636<br>17,Q6P6R2,Q811M5,Q99MH3,Q9EQS0,Q9QX74,Q9WTT6,Q9WVK7 |
| 2275 | 1,2,5,6,19, 3,4,7,8,17,<br>20,21,22 18,23,24 | 4  | O70417,P52590,Q5I0J9,Q5PQL7                                                                                                              |
| 2276 | 1,2,5,6,19, 3,4,7,8,17,<br>20,21,23 18,22,24 | 4  | O70417,P35280,P52590,Q5I0J9                                                                                                              |
| 2277 | 1,2,5,6,19, 3,4,7,8,17,<br>20,21,24 18,22,23 | 5  | O35547,O70417,P35280,Q5I0J9,Q68G31                                                                                                       |
| 2278 | 1,2,5,6,19, 3,4,7,8,17,<br>20,22,23 18,21,24 | 3  | P00762,P02625,Q9EQS0                                                                                                                     |
| 2279 | 1,2,5,6,19, 3,4,7,8,17,<br>20,22,24 18,21,23 | 3  | Q5I0J9,Q68G31,Q9QX74                                                                                                                     |
| 2280 | 1,2,5,6,19, 3,4,7,8,17,<br>20,23,24 18,21,22 | 5  | O70417,P23739,P35280,Q68G31,Q9QX74                                                                                                       |
| 2281 | 1,2,5,6,19, 3,4,7,8,17,<br>21,22,23 18,20,24 | 4  | O70417,P00762,Q811M5,Q9EQS0                                                                                                              |
| 2282 | 1,2,5,6,19, 3,4,7,8,17,<br>21,22,24 18,20,23 | 2  | O70417,P30919                                                                                                                            |
| 2283 | 1,2,5,6,19, 3,4,7,8,17,<br>21,23,24 18,20,22 | 5  | O70417,P14173,P35280,Q4G075,Q9JJ50                                                                                                       |
| 2284 | 1,2,5,6,19, 3,4,7,8,17,<br>22,23,24 18,20,21 | 13 | D4A5U3,O70417,P00507,P00762,P13676,P20646,P22273,P26772,Q6P6R2,Q811M5,Q9EQS0,Q9<br>QX74,Q9WTT6                                           |
| 2285 | 1,2,5,6,20, 3,4,7,8,17,<br>21,22,23 18,19,24 | 3  | O70417,P01835,Q03191                                                                                                                     |
| 2286 | 1,2,5,6,20, 3,4,7,8,17,<br>21,22,24 18,19,23 | 4  | O70417,P01835,P20646,Q5I0J9                                                                                                              |
| 2287 | 1,2,5,6,20, 3,4,7,8,17,<br>21,23,24 18,19,22 | 4  | O70417,P01835,P20646,P35280                                                                                                              |
| 2288 | 1,2,5,6,20, 3,4,7,8,17,<br>22,23,24 18,19,21 | 6  | O70417,P20646,Q5QE79,Q6P6R2,Q9EQS0,Q9QX74                                                                                                |
| 2289 | 1,2,5,6,21, 3,4,7,8,17,<br>22,23,24 18,19,20 | 11 | O70417,P01835,P13676,P20646,P30919,P36860,Q62714,Q6P6R2,Q9EQS0,Q9QX74,Q9WTT6                                                             |
| 2290 | 1,2,5,7,8,1 3,4,6,20,2<br>7,18,19 1,22,23,24 | 6  | iRT-Kit_WR_fusion,P02783,P09656,P22006,Q66H69,Q9QX74                                                                                     |
| 2291 | 1,2,5,7,8,1 3,4,6,19,2<br>7,18,20 1,22,23,24 | 4  | P25809,Q4G075,Q5GRG2,Q811M5                                                                                                              |
| 2292 | 1,2,5,7,8,1 3,4,6,19,2<br>7,18,21 0,22,23,24 | 7  | iRT-Kit_WR_fusion,P06760,P22006,P62804,Q00715,Q811M5,Q9QX74                                                                              |

|      |                        |                          |                                                                                            |
|------|------------------------|--------------------------|--------------------------------------------------------------------------------------------|
| 2293 | 1,2,5,7,8,1<br>7,18,22 | 3,4,6,19,2<br>0,21,23,24 | 0                                                                                          |
| 2294 | 1,2,5,7,8,1<br>7,18,23 | 3,4,6,19,2<br>0,21,22,24 | 4 O70594,P19132,P19814,P22006                                                              |
| 2295 | 1,2,5,7,8,1<br>7,18,24 | 3,4,6,19,2<br>0,21,22,23 | 3 P02783,P09656,Q811M5                                                                     |
| 2296 | 1,2,5,7,8,1<br>7,19,20 | 3,4,6,18,2<br>1,22,23,24 | 8 D4A5U3,iRT-Kit_WR_fusion,P13676,Q4G075,Q66H69,Q811M5,Q8CJD3,Q9WTT6                       |
| 2297 | 1,2,5,7,8,1<br>7,19,21 | 3,4,6,18,2<br>0,22,23,24 | 8 iRT-Kit_WR_fusion,P06760,P22006,P34080,P62804,Q00715,Q66H69,Q9QX74                       |
| 2298 | 1,2,5,7,8,1<br>7,19,22 | 3,4,6,18,2<br>0,21,23,24 | 2 iRT-Kit_WR_fusion,Q66H69                                                                 |
| 2299 | 1,2,5,7,8,1<br>7,19,23 | 3,4,6,18,2<br>0,21,22,24 | 4 iRT-Kit_WR_fusion,P22006,Q66H69,Q8CJD3                                                   |
| 2300 | 1,2,5,7,8,1<br>7,19,24 | 3,4,6,18,2<br>0,21,22,23 | 4 iRT-Kit_WR_fusion,P09656,P54921,Q66H69                                                   |
| 2301 | 1,2,5,7,8,1<br>7,20,21 | 3,4,6,18,1<br>9,22,23,24 | 11 D4A5U3,iRT-Kit_WR_fusion,P06760,P13676,P22006,P25809,P62804,Q00715,Q811M5,Q9QX74,Q9WTT6 |
| 2302 | 1,2,5,7,8,1<br>7,20,22 | 3,4,6,18,1<br>9,21,23,24 | 2 iRT-Kit_WR_fusion,Q4G075                                                                 |
| 2303 | 1,2,5,7,8,1<br>7,20,23 | 3,4,6,18,1<br>9,21,22,24 | 4 iRT-Kit_WR_fusion,P19132,P23739,Q4G075                                                   |
| 2304 | 1,2,5,7,8,1<br>7,20,24 | 3,4,6,18,1<br>9,21,22,23 | 1 Q811M5                                                                                   |
| 2305 | 1,2,5,7,8,1<br>7,21,22 | 3,4,6,18,1<br>9,20,23,24 | 2 iRT-Kit_WR_fusion,P06760                                                                 |
| 2306 | 1,2,5,7,8,1<br>7,21,23 | 3,4,6,18,1<br>9,20,22,24 | 7 iRT-Kit_WR_fusion,P06760,P19132,P19814,P22006,Q63474,Q9Z0V6                              |
| 2307 | 1,2,5,7,8,1<br>7,21,24 | 3,4,6,18,1<br>9,20,22,23 | 6 iRT-Kit_WR_fusion,P36860,Q63474,Q6AY61,Q6IMF3,Q811M5                                     |
| 2308 | 1,2,5,7,8,1<br>7,22,23 | 3,4,6,18,1<br>9,20,21,24 | 0                                                                                          |
| 2309 | 1,2,5,7,8,1<br>7,22,24 | 3,4,6,18,1<br>9,20,21,23 | 0                                                                                          |
| 2310 | 1,2,5,7,8,1<br>7,23,24 | 3,4,6,18,1<br>9,20,21,22 | 0                                                                                          |
| 2311 | 1,2,5,7,8,1<br>8,19,20 | 3,4,6,17,2<br>1,22,23,24 | 4 iRT-Kit_WR_fusion,P47967,Q5I0D1,Q66H69                                                   |
| 2312 | 1,2,5,7,8,1<br>8,19,21 | 3,4,6,17,2<br>0,22,23,24 | 6 iRT-Kit_WR_fusion,P06760,P22006,P62804,Q00715,Q66H69                                     |

|      |                        |                          |                                                                                     |
|------|------------------------|--------------------------|-------------------------------------------------------------------------------------|
| 2313 | 1,2,5,7,8,1<br>8,19,22 | 3,4,6,17,2<br>0,21,23,24 | 2 iRT-Kit_WR_fusion,Q66H69                                                          |
| 2314 | 1,2,5,7,8,1<br>8,19,23 | 3,4,6,17,2<br>0,21,22,24 | 2 iRT-Kit_WR_fusion,Q66H69                                                          |
| 2315 | 1,2,5,7,8,1<br>8,19,24 | 3,4,6,17,2<br>0,21,22,23 | 3 P02783,P09656,Q66H69                                                              |
| 2316 | 1,2,5,7,8,1<br>8,20,21 | 3,4,6,17,1<br>9,22,23,24 | 8 iRT-Kit_WR_fusion,P06760,P25809,P47967,P62804,Q00715,Q811M5,Q91ZS3                |
| 2317 | 1,2,5,7,8,1<br>8,20,22 | 3,4,6,17,1<br>9,21,23,24 | 2 Q03191,Q91ZS3                                                                     |
| 2318 | 1,2,5,7,8,1<br>8,20,23 | 3,4,6,17,1<br>9,21,22,24 | 3 P19132,P23739,Q03191                                                              |
| 2319 | 1,2,5,7,8,1<br>8,20,24 | 3,4,6,17,1<br>9,21,22,23 | 2 Q811M5,Q91ZS3                                                                     |
| 2320 | 1,2,5,7,8,1<br>8,21,22 | 3,4,6,17,1<br>9,20,23,24 | 2 iRT-Kit_WR_fusion,Q00715                                                          |
| 2321 | 1,2,5,7,8,1<br>8,21,23 | 3,4,6,17,1<br>9,20,22,24 | 5 iRT-Kit_WR_fusion,P19132,P19814,P22006,Q9JJ50                                     |
| 2322 | 1,2,5,7,8,1<br>8,21,24 | 3,4,6,17,1<br>9,20,22,23 | 3 iRT-Kit_WR_fusion,P36860,Q00715                                                   |
| 2323 | 1,2,5,7,8,1<br>8,22,23 | 3,4,6,17,1<br>9,20,21,24 | 0                                                                                   |
| 2324 | 1,2,5,7,8,1<br>8,22,24 | 3,4,6,17,1<br>9,20,21,23 | 0                                                                                   |
| 2325 | 1,2,5,7,8,1<br>8,23,24 | 3,4,6,17,1<br>9,20,21,22 | 2 Q9JJ50,Q9WVK7                                                                     |
| 2326 | 1,2,5,7,8,1<br>9,20,21 | 3,4,6,17,1<br>8,22,23,24 | 10 iRT-Kit_WR_fusion,P06760,P47967,P55159,P62804,Q00715,Q5I0D1,Q66H69,Q812E4,Q9WTT6 |
| 2327 | 1,2,5,7,8,1<br>9,20,22 | 3,4,6,17,1<br>8,21,23,24 | 3 iRT-Kit_WR_fusion,P19218,Q4G075                                                   |
| 2328 | 1,2,5,7,8,1<br>9,20,23 | 3,4,6,17,1<br>8,21,22,24 | 4 iRT-Kit_WR_fusion,P23739,Q4G075,Q8CJD3                                            |
| 2329 | 1,2,5,7,8,1<br>9,20,24 | 3,4,6,17,1<br>8,21,22,23 | 3 iRT-Kit_WR_fusion,Q66H69,Q812E4                                                   |
| 2330 | 1,2,5,7,8,1<br>9,21,22 | 3,4,6,17,1<br>8,20,23,24 | 3 iRT-Kit_WR_fusion,P06760,Q66H69                                                   |
| 2331 | 1,2,5,7,8,1<br>9,21,23 | 3,4,6,17,1<br>8,20,22,24 | 5 iRT-Kit_WR_fusion,P06760,P22006,Q66H69,Q8CJD3                                     |
| 2332 | 1,2,5,7,8,1<br>9,21,24 | 3,4,6,17,1<br>8,20,22,23 | 3 iRT-Kit_WR_fusion,Q63474,Q66H69                                                   |

|      |                         |                          |                                                               |
|------|-------------------------|--------------------------|---------------------------------------------------------------|
| 2333 | 1,2,5,7,8,1<br>9,22,23  | 3,4,6,17,1<br>8,20,21,24 | 2 iRT-Kit_WR_fusion,Q8CJD3                                    |
| 2334 | 1,2,5,7,8,1<br>9,22,24  | 3,4,6,17,1<br>8,20,21,23 | 1 iRT-Kit_WR_fusion                                           |
| 2335 | 1,2,5,7,8,1<br>9,23,24  | 3,4,6,17,1<br>8,20,21,22 | 2 iRT-Kit_WR_fusion,Q8CJD3                                    |
| 2336 | 1,2,5,7,8,2<br>0,21,22  | 3,4,6,17,1<br>8,19,23,24 | 2 iRT-Kit_WR_fusion,P06760                                    |
| 2337 | 1,2,5,7,8,2<br>0,21,23  | 3,4,6,17,1<br>8,19,22,24 | 5 iRT-Kit_WR_fusion,P06760,P08649,P19132,P23739               |
| 2338 | 1,2,5,7,8,2<br>0,21,24  | 3,4,6,17,1<br>8,19,22,23 | 7 iRT-Kit_WR_fusion,P06760,P08649,P09456,Q811M5,Q812E4,Q9JHB9 |
| 2339 | 1,2,5,7,8,2<br>0,22,23  | 3,4,6,17,1<br>8,19,21,24 | 5 iRT-Kit_WR_fusion,P19132,P23739,Q03191,Q4G075               |
| 2340 | 1,2,5,7,8,2<br>0,22,24  | 3,4,6,17,1<br>8,19,21,23 | 1 iRT-Kit_WR_fusion                                           |
| 2341 | 1,2,5,7,8,2<br>0,23,24  | 3,4,6,17,1<br>8,19,21,22 | 3 iRT-Kit_WR_fusion,P19132,P23739                             |
| 2342 | 1,2,5,7,8,2<br>1,22,23  | 3,4,6,17,1<br>8,19,20,24 | 2 iRT-Kit_WR_fusion,Q62714                                    |
| 2343 | 1,2,5,7,8,2<br>1,22,24  | 3,4,6,17,1<br>8,19,20,23 | 2 iRT-Kit_WR_fusion,Q62714                                    |
| 2344 | 1,2,5,7,8,2<br>1,23,24  | 3,4,6,17,1<br>8,19,20,22 | 6 iRT-Kit_WR_fusion,P08649,P36860,Q62714,Q63474,Q9JJ50        |
| 2345 | 1,2,5,7,8,2<br>2,23,24  | 3,4,6,17,1<br>8,19,20,21 | 2 Q62714,Q6P6R2                                               |
| 2346 | 1,2,5,7,17,<br>18,19,20 | 3,4,6,8,21,<br>22,23,24  | 4 P00762,P02783,P09656,P30919                                 |
| 2347 | 1,2,5,7,17,<br>18,19,21 | 3,4,6,8,20,<br>22,23,24  | 3 P00762,P02783,P22006                                        |
| 2348 | 1,2,5,7,17,<br>18,19,22 | 3,4,6,8,20,<br>21,23,24  | 2 P00762,P09656                                               |
| 2349 | 1,2,5,7,17,<br>18,19,23 | 3,4,6,8,20,<br>21,22,24  | 3 P00762,P22006,Q10743                                        |
| 2350 | 1,2,5,7,17,<br>18,19,24 | 3,4,6,8,20,<br>21,22,23  | 5 P00762,P02783,P09656,P54921,Q6AY61                          |
| 2351 | 1,2,5,7,17,<br>18,20,21 | 3,4,6,8,19,<br>22,23,24  | 3 P00507,P25809,Q811M5                                        |
| 2352 | 1,2,5,7,17,<br>18,20,22 | 3,4,6,8,19,<br>21,23,24  | 3 P00762,Q03191,Q9Z0J6                                        |

|      |                                              |                                             |
|------|----------------------------------------------|---------------------------------------------|
| 2353 | 1,2,5,7,17, 3,4,6,8,19,<br>18,20,23 21,22,24 | 4 P00762,P30919,Q03191,Q10743               |
| 2354 | 1,2,5,7,17, 3,4,6,8,19,<br>18,20,24 21,22,23 | 2 P02783,Q811M5                             |
| 2355 | 1,2,5,7,17, 3,4,6,8,19,<br>18,21,22 20,23,24 | 1 P00762                                    |
| 2356 | 1,2,5,7,17, 3,4,6,8,19,<br>18,21,23 20,22,24 | 4 O70417,P00762,P19814,P22006               |
| 2357 | 1,2,5,7,17, 3,4,6,8,19,<br>18,21,24 20,22,23 | 3 P02783,P36860,Q6AY61                      |
| 2358 | 1,2,5,7,17, 3,4,6,8,19,<br>18,22,23 20,21,24 | 4 P00714,P00762,Q10743,Q9EQS0               |
| 2359 | 1,2,5,7,17, 3,4,6,8,19,<br>18,22,24 20,21,23 | 1 P00762                                    |
| 2360 | 1,2,5,7,17, 3,4,6,8,19,<br>18,23,24 20,21,22 | 1 P00762                                    |
| 2361 | 1,2,5,7,17, 3,4,6,8,18,<br>19,20,21 22,23,24 | 2 Q6AY61,Q811M5                             |
| 2362 | 1,2,5,7,17, 3,4,6,8,18,<br>19,20,22 21,23,24 | 3 O89117,P00762,P02625                      |
| 2363 | 1,2,5,7,17, 3,4,6,8,18,<br>19,20,23 21,22,24 | 4 P00762,P02625,P23739,Q8CJD3               |
| 2364 | 1,2,5,7,17, 3,4,6,8,18,<br>19,20,24 21,22,23 | 3 P02783,P54921,Q6AY61                      |
| 2365 | 1,2,5,7,17, 3,4,6,8,18,<br>19,21,22 20,23,24 | 2 P00762,Q9R168                             |
| 2366 | 1,2,5,7,17, 3,4,6,8,18,<br>19,21,23 20,22,24 | 4 O70417,P00762,P22006,Q9R168               |
| 2367 | 1,2,5,7,17, 3,4,6,8,18,<br>19,21,24 20,22,23 | 4 P54921,Q62761;Q62762;Q62763,Q6AY61,Q9R168 |
| 2368 | 1,2,5,7,17, 3,4,6,8,18,<br>19,22,23 20,21,24 | 3 P00762,P02625,Q9R168                      |
| 2369 | 1,2,5,7,17, 3,4,6,8,18,<br>19,22,24 20,21,23 | 3 P00762,P54921,Q9R168                      |
| 2370 | 1,2,5,7,17, 3,4,6,8,18,<br>19,23,24 20,21,22 | 2 P00762,P54921                             |
| 2371 | 1,2,5,7,17, 3,4,6,8,18,<br>20,21,22 19,23,24 | 0                                           |
| 2372 | 1,2,5,7,17, 3,4,6,8,18,<br>20,21,23 19,22,24 | 0                                           |

|      |                                              |                               |
|------|----------------------------------------------|-------------------------------|
| 2373 | 1,2,5,7,17, 3,4,6,8,18,<br>20,21,24 19,22,23 | 2 Q6AY61,Q811M5               |
| 2374 | 1,2,5,7,17, 3,4,6,8,18,<br>20,22,23 19,21,24 | 3 P00762,P02625,Q03191        |
| 2375 | 1,2,5,7,17, 3,4,6,8,18,<br>20,22,24 19,21,23 | 0                             |
| 2376 | 1,2,5,7,17, 3,4,6,8,18,<br>20,23,24 19,21,22 | 1 P23739                      |
| 2377 | 1,2,5,7,17, 3,4,6,8,18,<br>21,22,23 19,20,24 | 1 Q9R168                      |
| 2378 | 1,2,5,7,17, 3,4,6,8,18,<br>21,22,24 19,20,23 | 2 P36860,Q9R168               |
| 2379 | 1,2,5,7,17, 3,4,6,8,18,<br>21,23,24 19,20,22 | 4 O70417,P36860,Q6AY61,Q9R168 |
| 2380 | 1,2,5,7,17, 3,4,6,8,18,<br>22,23,24 19,20,21 | 3 P00762,P22273,Q9R168        |
| 2381 | 1,2,5,7,18, 3,4,6,8,17,<br>19,20,21 22,23,24 | 2 P47967,Q5I0D1               |
| 2382 | 1,2,5,7,18, 3,4,6,8,17,<br>19,20,22 21,23,24 | 1 P00762                      |
| 2383 | 1,2,5,7,18, 3,4,6,8,17,<br>19,20,23 21,22,24 | 1 P00762                      |
| 2384 | 1,2,5,7,18, 3,4,6,8,17,<br>19,20,24 21,22,23 | 2 P00762,P02783               |
| 2385 | 1,2,5,7,18, 3,4,6,8,17,<br>19,21,22 20,23,24 | 2 O70417,P00762               |
| 2386 | 1,2,5,7,18, 3,4,6,8,17,<br>19,21,23 20,22,24 | 3 O70417,P00762,P22006        |
| 2387 | 1,2,5,7,18, 3,4,6,8,17,<br>19,21,24 20,22,23 | 2 O70417,P02783               |
| 2388 | 1,2,5,7,18, 3,4,6,8,17,<br>19,22,23 20,21,24 | 3 O70417,P00762,Q9EQS0        |
| 2389 | 1,2,5,7,18, 3,4,6,8,17,<br>19,22,24 20,21,23 | 1 P00762                      |
| 2390 | 1,2,5,7,18, 3,4,6,8,17,<br>19,23,24 20,21,22 | 2 O70417,P00762               |
| 2391 | 1,2,5,7,18, 3,4,6,8,17,<br>20,21,22 19,23,24 | 2 P01835,Q03191               |
| 2392 | 1,2,5,7,18, 3,4,6,8,17,<br>20,21,23 19,22,24 | 3 O70417,P01835,Q03191        |

|      |                                              |                                                           |
|------|----------------------------------------------|-----------------------------------------------------------|
| 2393 | 1,2,5,7,18, 3,4,6,8,17,<br>20,21,24 19,22,23 | 1 P01835                                                  |
| 2394 | 1,2,5,7,18, 3,4,6,8,17,<br>20,22,23 19,21,24 | 3 P00762,Q03191,Q9EQS0                                    |
| 2395 | 1,2,5,7,18, 3,4,6,8,17,<br>20,22,24 19,21,23 | 1 Q03191                                                  |
| 2396 | 1,2,5,7,18, 3,4,6,8,17,<br>20,23,24 19,21,22 | 1 Q03191                                                  |
| 2397 | 1,2,5,7,18, 3,4,6,8,17,<br>21,22,23 19,20,24 | 4 O70417,P01835,Q03191,Q9EQS0                             |
| 2398 | 1,2,5,7,18, 3,4,6,8,17,<br>21,22,24 19,20,23 | 2 O70417,P01835                                           |
| 2399 | 1,2,5,7,18, 3,4,6,8,17,<br>21,23,24 19,20,22 | 4 O70417,O89117,P01835,Q9JJ50                             |
| 2400 | 1,2,5,7,18, 3,4,6,8,17,<br>22,23,24 19,20,21 | 8 O70417,P00762,P13676,P36374,Q03191,Q6P6R2,Q9EQS0,Q9WVK7 |
| 2401 | 1,2,5,7,19, 3,4,6,8,17,<br>20,21,22 18,23,24 | 1 P47967                                                  |
| 2402 | 1,2,5,7,19, 3,4,6,8,17,<br>20,21,23 18,22,24 | 3 O70417,P08649,P14173                                    |
| 2403 | 1,2,5,7,19, 3,4,6,8,17,<br>20,21,24 18,22,23 | 4 O70417,P08649,P14173,Q6AY61                             |
| 2404 | 1,2,5,7,19, 3,4,6,8,17,<br>20,22,23 18,21,24 | 3 P00762,P02625,P23739                                    |
| 2405 | 1,2,5,7,19, 3,4,6,8,17,<br>20,22,24 18,21,23 | 0                                                         |
| 2406 | 1,2,5,7,19, 3,4,6,8,17,<br>20,23,24 18,21,22 | 2 P14173,P23739                                           |
| 2407 | 1,2,5,7,19, 3,4,6,8,17,<br>21,22,23 18,20,24 | 4 O70417,P00762,P08649,Q9R168                             |
| 2408 | 1,2,5,7,19, 3,4,6,8,17,<br>21,22,24 18,20,23 | 3 O70417,P08649,Q9R168                                    |
| 2409 | 1,2,5,7,19, 3,4,6,8,17,<br>21,23,24 18,20,22 | 3 O70417,P08649,P14173                                    |
| 2410 | 1,2,5,7,19, 3,4,6,8,17,<br>22,23,24 18,20,21 | 3 O70417,P00762,P26772                                    |
| 2411 | 1,2,5,7,20, 3,4,6,8,17,<br>21,22,23 18,19,24 | 4 O70417,P01835,P08649,Q03191                             |
| 2412 | 1,2,5,7,20, 3,4,6,8,17,<br>21,22,24 18,19,23 | 2 P01835,P08649                                           |



|      |                                              |                                                                  |
|------|----------------------------------------------|------------------------------------------------------------------|
| 2413 | 1,2,5,7,20, 3,4,6,8,17,<br>21,23,24 18,19,22 | 4 O70417,P01835,P08649,P23739                                    |
| 2414 | 1,2,5,7,20, 3,4,6,8,17,<br>22,23,24 18,19,21 | 4 P08649,P23739,Q03191,Q6P6R2                                    |
| 2415 | 1,2,5,7,21, 3,4,6,8,17,<br>22,23,24 18,19,20 | 5 O70417,P01835,P08649,Q62714,Q9R168                             |
| 2416 | 1,2,5,8,17, 3,4,6,7,21,<br>18,19,20 22,23,24 | 3 P02783,P09656,P25809                                           |
| 2417 | 1,2,5,8,17, 3,4,6,7,20,<br>18,19,21 22,23,24 | 3 P02783,P22006,Q66H69                                           |
| 2418 | 1,2,5,8,17, 3,4,6,7,20,<br>18,19,22 21,23,24 | 1 P09656                                                         |
| 2419 | 1,2,5,8,17, 3,4,6,7,20,<br>18,19,23 21,22,24 | 1 P22006                                                         |
| 2420 | 1,2,5,8,17, 3,4,6,7,20,<br>18,19,24 21,22,23 | 2 P02783,P09656                                                  |
| 2421 | 1,2,5,8,17, 3,4,6,7,19,<br>18,20,21 22,23,24 | 4 P22006,P25809,P36375,Q811M5                                    |
| 2422 | 1,2,5,8,17, 3,4,6,7,19,<br>18,20,22 21,23,24 | 2 P00714,P25809                                                  |
| 2423 | 1,2,5,8,17, 3,4,6,7,19,<br>18,20,23 21,22,24 | 3 P00714,P19132,P23739                                           |
| 2424 | 1,2,5,8,17, 3,4,6,7,19,<br>18,20,24 21,22,23 | 2 P02783,Q811M5                                                  |
| 2425 | 1,2,5,8,17, 3,4,6,7,19,<br>18,21,22 20,23,24 | 1 P10758                                                         |
| 2426 | 1,2,5,8,17, 3,4,6,7,19,<br>18,21,23 20,22,24 | 3 P19132,P19814,P22006                                           |
| 2427 | 1,2,5,8,17, 3,4,6,7,19,<br>18,21,24 20,22,23 | 2 P02783,P10758                                                  |
| 2428 | 1,2,5,8,17, 3,4,6,7,19,<br>18,22,23 20,21,24 | 4 P00714,P11598,P22283,Q63617                                    |
| 2429 | 1,2,5,8,17, 3,4,6,7,19,<br>18,22,24 20,21,23 | 4 P00714,P10758,P11598,Q63617                                    |
| 2430 | 1,2,5,8,17, 3,4,6,7,19,<br>18,23,24 20,21,22 | 2 P00714,Q63617                                                  |
| 2431 | 1,2,5,8,17, 3,4,6,7,18,<br>19,20,21 22,23,24 | 9 B0LT89,P06760,P22006,P25809,P97675,Q66H69,Q6P6R2,Q811M5,Q8CJD3 |
| 2432 | 1,2,5,8,17, 3,4,6,7,18,<br>19,20,22 21,23,24 | 1 O89117                                                         |

|      |                                              |                                                    |
|------|----------------------------------------------|----------------------------------------------------|
| 2433 | 1,2,5,8,17, 3,4,6,7,18,<br>19,20,23 21,22,24 | 2 P23739,Q8CJD3                                    |
| 2434 | 1,2,5,8,17, 3,4,6,7,18,<br>19,20,24 21,22,23 | 2 P02783,Q68G31                                    |
| 2435 | 1,2,5,8,17, 3,4,6,7,18,<br>19,21,22 20,23,24 | 0                                                  |
| 2436 | 1,2,5,8,17, 3,4,6,7,18,<br>19,21,23 20,22,24 | 2 P22006,Q8CJD3                                    |
| 2437 | 1,2,5,8,17, 3,4,6,7,18,<br>19,21,24 20,22,23 | 2 Q63474,Q66H69                                    |
| 2438 | 1,2,5,8,17, 3,4,6,7,18,<br>19,22,23 20,21,24 | 4 P00507,P00714,P11598,Q8CJD3                      |
| 2439 | 1,2,5,8,17, 3,4,6,7,18,<br>19,22,24 20,21,23 | 1 P00507                                           |
| 2440 | 1,2,5,8,17, 3,4,6,7,18,<br>19,23,24 20,21,22 | 1 Q8CJD3                                           |
| 2441 | 1,2,5,8,17, 3,4,6,7,18,<br>20,21,22 19,23,24 | 2 F1M3L7,P25809                                    |
| 2442 | 1,2,5,8,17, 3,4,6,7,18,<br>20,21,23 19,22,24 | 5 P19132,P22006,P23739,P36375,P63029               |
| 2443 | 1,2,5,8,17, 3,4,6,7,18,<br>20,21,24 19,22,23 | 1 Q811M5                                           |
| 2444 | 1,2,5,8,17, 3,4,6,7,18,<br>20,22,23 19,21,24 | 3 P00714,P19132,P23739                             |
| 2445 | 1,2,5,8,17, 3,4,6,7,18,<br>20,22,24 19,21,23 | 0                                                  |
| 2446 | 1,2,5,8,17, 3,4,6,7,18,<br>20,23,24 19,21,22 | 2 P19132,P23739                                    |
| 2447 | 1,2,5,8,17, 3,4,6,7,18,<br>21,22,23 19,20,24 | 1 P68511                                           |
| 2448 | 1,2,5,8,17, 3,4,6,7,18,<br>21,22,24 19,20,23 | 1 P10758                                           |
| 2449 | 1,2,5,8,17, 3,4,6,7,18,<br>21,23,24 19,20,22 | 2 Q63474,Q80WL1                                    |
| 2450 | 1,2,5,8,17, 3,4,6,7,18,<br>22,23,24 19,20,21 | 7 P00507,P00714,P11598,P22283,P47967,P97840,Q63617 |
| 2451 | 1,2,5,8,18, 3,4,6,7,17,<br>19,20,21 22,23,24 | 4 F1M3L7,P25809,Q66H69,Q68G31                      |
| 2452 | 1,2,5,8,18, 3,4,6,7,17,<br>19,20,22 21,23,24 | 0                                                  |

|      |                                              |                                                                  |
|------|----------------------------------------------|------------------------------------------------------------------|
| 2453 | 1,2,5,8,18, 3,4,6,7,17,<br>19,20,23 21,22,24 | 1 P23739                                                         |
| 2454 | 1,2,5,8,18, 3,4,6,7,17,<br>19,20,24 21,22,23 | 2 P02783,Q68G31                                                  |
| 2455 | 1,2,5,8,18, 3,4,6,7,17,<br>19,21,22 20,23,24 | 0                                                                |
| 2456 | 1,2,5,8,18, 3,4,6,7,17,<br>19,21,23 20,22,24 | 1 P22006                                                         |
| 2457 | 1,2,5,8,18, 3,4,6,7,17,<br>19,21,24 20,22,23 | 3 P02783,Q66H69,Q68G31                                           |
| 2458 | 1,2,5,8,18, 3,4,6,7,17,<br>19,22,23 20,21,24 | 2 P00507,P00714                                                  |
| 2459 | 1,2,5,8,18, 3,4,6,7,17,<br>19,22,24 20,21,23 | 1 P00507                                                         |
| 2460 | 1,2,5,8,18, 3,4,6,7,17,<br>19,23,24 20,21,22 | 0                                                                |
| 2461 | 1,2,5,8,18, 3,4,6,7,17,<br>20,21,22 19,23,24 | 2 F1M3L7,P25809                                                  |
| 2462 | 1,2,5,8,18, 3,4,6,7,17,<br>20,21,23 19,22,24 | 1 P19132                                                         |
| 2463 | 1,2,5,8,18, 3,4,6,7,17,<br>20,21,24 19,22,23 | 0                                                                |
| 2464 | 1,2,5,8,18, 3,4,6,7,17,<br>20,22,23 19,21,24 | 4 P00714,P19132,Q5QE79,Q99MH3                                    |
| 2465 | 1,2,5,8,18, 3,4,6,7,17,<br>20,22,24 19,21,23 | 1 Q5QE79                                                         |
| 2466 | 1,2,5,8,18, 3,4,6,7,17,<br>20,23,24 19,21,22 | 2 P23739,Q5QE79                                                  |
| 2467 | 1,2,5,8,18, 3,4,6,7,17,<br>21,22,23 19,20,24 | 1 P54921                                                         |
| 2468 | 1,2,5,8,18, 3,4,6,7,17,<br>21,22,24 19,20,23 | 0                                                                |
| 2469 | 1,2,5,8,18, 3,4,6,7,17,<br>21,23,24 19,20,22 | 1 Q9JJ50                                                         |
| 2470 | 1,2,5,8,18, 3,4,6,7,17,<br>22,23,24 19,20,21 | 9 P00507,P00714,P11598,P20646,Q5QE79,Q63617,Q6P6R2,Q9R0T3,Q9WVK7 |
| 2471 | 1,2,5,8,19, 3,4,6,7,17,<br>20,21,22 18,23,24 | 1 F1M3L7                                                         |
| 2472 | 1,2,5,8,19, 3,4,6,7,17,<br>20,21,23 18,22,24 | 3 P19132,P23739,Q8CJD3                                           |

|      |                                              |                                                    |
|------|----------------------------------------------|----------------------------------------------------|
| 2473 | 1,2,5,8,19, 3,4,6,7,17,<br>20,21,24 18,22,23 | 2 P30120,Q68G31                                    |
| 2474 | 1,2,5,8,19, 3,4,6,7,17,<br>20,22,23 18,21,24 | 2 P23739,Q8CJD3                                    |
| 2475 | 1,2,5,8,19, 3,4,6,7,17,<br>20,22,24 18,21,23 | 0                                                  |
| 2476 | 1,2,5,8,19, 3,4,6,7,17,<br>20,23,24 18,21,22 | 2 P23739,Q8CJD3                                    |
| 2477 | 1,2,5,8,19, 3,4,6,7,17,<br>21,22,23 18,20,24 | 0                                                  |
| 2478 | 1,2,5,8,19, 3,4,6,7,17,<br>21,22,24 18,20,23 | 0                                                  |
| 2479 | 1,2,5,8,19, 3,4,6,7,17,<br>21,23,24 18,20,22 | 2 O70417,Q63474                                    |
| 2480 | 1,2,5,8,19, 3,4,6,7,17,<br>22,23,24 18,20,21 | 2 P00507,P26772                                    |
| 2481 | 1,2,5,8,20, 3,4,6,7,17,<br>21,22,23 18,19,24 | 3 F1M3L7,P19132,P23739                             |
| 2482 | 1,2,5,8,20, 3,4,6,7,17,<br>21,22,24 18,19,23 | 1 F1M3L7                                           |
| 2483 | 1,2,5,8,20, 3,4,6,7,17,<br>21,23,24 18,19,22 | 2 P19132,P23739                                    |
| 2484 | 1,2,5,8,20, 3,4,6,7,17,<br>22,23,24 18,19,21 | 2 P23739,Q5QE79                                    |
| 2485 | 1,2,5,8,21, 3,4,6,7,17,<br>22,23,24 18,19,20 | 3 P30919,Q62714,Q8K1G0                             |
| 2486 | 1,2,5,17,1 3,4,6,7,8,2<br>8,19,20,21 2,23,24 | 7 B0LT89,O70417,P02783,P20761,P25809,P35280,Q99041 |
| 2487 | 1,2,5,17,1 3,4,6,7,8,2<br>8,19,20,22 1,23,24 | 3 P00714,P00762,P20761                             |
| 2488 | 1,2,5,17,1 3,4,6,7,8,2<br>8,19,20,23 1,22,24 | 6 O70417,P00714,P00762,P02625,P35280,Q99041        |
| 2489 | 1,2,5,17,1 3,4,6,7,8,2<br>8,19,20,24 1,22,23 | 5 P02783,P09656,P20761,P35280,Q99041               |
| 2490 | 1,2,5,17,1 3,4,6,7,8,2<br>8,19,21,22 0,23,24 | 3 O70417,P20761,P22273                             |
| 2491 | 1,2,5,17,1 3,4,6,7,8,2<br>8,19,21,23 0,22,24 | 6 O70417,P02780,P22006,P22273,P35280,Q99041        |
| 2492 | 1,2,5,17,1 3,4,6,7,8,2<br>8,19,21,24 0,22,23 | 7 O70417,P02783,P20761,P22273,P35280,Q4G075,Q99041 |

|      |                                              |    |                                                                                                                                                 |
|------|----------------------------------------------|----|-------------------------------------------------------------------------------------------------------------------------------------------------|
| 2493 | 1,2,5,17,1 3,4,6,7,8,2<br>8,19,22,23 0,21,24 | 11 | O70417,P00714,P00762,P02780,P06761,P11598,P22273,P22282,Q5M8C6,Q63617,Q9EQS0                                                                    |
| 2494 | 1,2,5,17,1 3,4,6,7,8,2<br>8,19,22,24 0,21,23 | 9  | O70417,P00714,P00762,P02780,P09656,P11598,P20761,P22273,Q63617                                                                                  |
| 2495 | 1,2,5,17,1 3,4,6,7,8,2<br>8,19,23,24 0,21,22 | 10 | O70417,P00714,P00762,P02780,P11598,P22273,P22282,P35280,Q63617,Q99041                                                                           |
| 2496 | 1,2,5,17,1 3,4,6,7,8,1<br>8,20,21,22 9,23,24 | 3  | P00714,P20761,P25809                                                                                                                            |
| 2497 | 1,2,5,17,1 3,4,6,7,8,1<br>8,20,21,23 9,22,24 | 5  | O70417,P00714,P35280,Q99041,Q9QZK9                                                                                                              |
| 2498 | 1,2,5,17,1 3,4,6,7,8,1<br>8,20,21,24 9,22,23 | 5  | O70417,P02783,P20761,P35280,Q99041                                                                                                              |
| 2499 | 1,2,5,17,1 3,4,6,7,8,1<br>8,20,22,23 9,21,24 | 6  | P00714,P04355,P22282,Q63617,Q99041,Q9EQS0                                                                                                       |
| 2500 | 1,2,5,17,1 3,4,6,7,8,1<br>8,20,22,24 9,21,23 | 4  | P00714,P20761,P22282,Q99041                                                                                                                     |
| 2501 | 1,2,5,17,1 3,4,6,7,8,1<br>8,20,23,24 9,21,22 | 6  | O70417,P00714,P22282,P23739,P35280,Q99041                                                                                                       |
| 2502 | 1,2,5,17,1 3,4,6,7,8,1<br>8,21,22,23 9,20,24 | 18 | O70417,P00714,P02780,P06761,P08723,P0C0A9,P11598,P19814,P22273,P22282,P46462,P6851<br>1,Q5M8C6,Q62902,Q63617,Q99041,Q9QW07,Q9QZK9               |
| 2503 | 1,2,5,17,1 3,4,6,7,8,1<br>8,21,22,24 9,20,23 | 11 | O70417,P00714,P02780,P10758,P11598,P20761,P22273,P22282,Q4G075,Q63617,Q99041                                                                    |
| 2504 | 1,2,5,17,1 3,4,6,7,8,1<br>8,21,23,24 9,20,22 | 11 | O70417,P00714,P02780,P06761,P22273,P22282,P35280,Q4G075,Q63617,Q99041,Q9QZK9                                                                    |
| 2505 | 1,2,5,17,1 3,4,6,7,8,1<br>8,22,23,24 9,20,21 | 20 | D3ZUC6,D4A5U3,O70417,P00714,P02780,P06761,P0C0A9,P11598,P22273,P22282,P22283,P363<br>74,P46462,Q5I0D1,Q5M8C6,Q63617,Q99041,Q9EQS0,Q9R0T3,Q9WTT6 |
| 2506 | 1,2,5,17,1 3,4,6,7,8,1<br>9,20,21,22 8,23,24 | 2  | O70257,P20761                                                                                                                                   |
| 2507 | 1,2,5,17,1 3,4,6,7,8,1<br>9,20,21,23 8,22,24 | 6  | O70257,O70417,P23739,P35280,Q8CJD3,Q99041                                                                                                       |
| 2508 | 1,2,5,17,1 3,4,6,7,8,1<br>9,20,21,24 8,22,23 | 7  | O70417,P02783,P20761,P35280,P54921,Q6AY61,Q99041                                                                                                |
| 2509 | 1,2,5,17,1 3,4,6,7,8,1<br>9,20,22,23 8,21,24 | 4  | O89117,P00714,P02625,P23739                                                                                                                     |
| 2510 | 1,2,5,17,1 3,4,6,7,8,1<br>9,20,22,24 8,21,23 | 3  | O89117,P02625,P20761                                                                                                                            |
| 2511 | 1,2,5,17,1 3,4,6,7,8,1<br>9,20,23,24 8,21,22 | 5  | O70417,P02625,P23739,P35280,Q99041                                                                                                              |
| 2512 | 1,2,5,17,1 3,4,6,7,8,1<br>9,21,22,23 8,20,24 | 7  | O70417,P00714,P02780,P11598,P22273,P22282,Q9R168                                                                                                |

|      |                                              |    |                                                                                                                                                    |
|------|----------------------------------------------|----|----------------------------------------------------------------------------------------------------------------------------------------------------|
| 2513 | 1,2,5,17,1 3,4,6,7,8,1<br>9,21,22,24 8,20,23 | 5  | O70417,P20761,P22273,Q4G075,Q9R168                                                                                                                 |
| 2514 | 1,2,5,17,1 3,4,6,7,8,1<br>9,21,23,24 8,20,22 | 7  | O70417,P02780,P12020,P22273,P35280,Q4G075,Q99041                                                                                                   |
| 2515 | 1,2,5,17,1 3,4,6,7,8,1<br>9,22,23,24 8,20,21 | 14 | O70417,P00507,P00714,P00762,P02625,P02780,P06761,P11598,P22273,P22282,P26772,Q5M8C6,Q63617,Q99041                                                  |
| 2516 | 1,2,5,17,2 3,4,6,7,8,1<br>0,21,22,23 8,19,24 | 3  | O70417,P00714,P22282                                                                                                                               |
| 2517 | 1,2,5,17,2 3,4,6,7,8,1<br>0,21,22,24 8,19,23 | 2  | O70417,P20761                                                                                                                                      |
| 2518 | 1,2,5,17,2 3,4,6,7,8,1<br>0,21,23,24 8,19,22 | 4  | O70417,P23739,P35280,Q99041                                                                                                                        |
| 2519 | 1,2,5,17,2 3,4,6,7,8,1<br>0,22,23,24 8,19,21 | 10 | P00714,P02625,P06761,P08937,P22273,P22282,P23739,Q63617,Q63751,Q99041                                                                              |
| 2520 | 1,2,5,17,2 3,4,6,7,8,1<br>1,22,23,24 8,19,20 | 11 | O70417,P00714,P02780,P06761,P11598,P22273,P22282,Q4G075,Q63617,Q99041,Q9R168                                                                       |
| 2521 | 1,2,5,18,1 3,4,6,7,8,1<br>9,20,21,22 7,23,24 | 3  | F1M3L7,O70417,P20761                                                                                                                               |
| 2522 | 1,2,5,18,1 3,4,6,7,8,1<br>9,20,21,23 7,22,24 | 4  | O70417,P23593,P35280,Q99041                                                                                                                        |
| 2523 | 1,2,5,18,1 3,4,6,7,8,1<br>9,20,21,24 7,22,23 | 6  | O70417,P02783,P20761,P35280,Q68G31,Q99041                                                                                                          |
| 2524 | 1,2,5,18,1 3,4,6,7,8,1<br>9,20,22,23 7,21,24 | 5  | O70417,P00714,P02625,P04762,Q9EQS0                                                                                                                 |
| 2525 | 1,2,5,18,1 3,4,6,7,8,1<br>9,20,22,24 7,21,23 | 2  | O70417,P20761                                                                                                                                      |
| 2526 | 1,2,5,18,1 3,4,6,7,8,1<br>9,20,23,24 7,21,22 | 5  | O70417,P23739,P35280,Q5QE79,Q99041                                                                                                                 |
| 2527 | 1,2,5,18,1 3,4,6,7,8,1<br>9,21,22,23 7,20,24 | 8  | O70417,P00714,P06911,P22273,P22282,Q4G075,Q5M8C6,Q9EQS0                                                                                            |
| 2528 | 1,2,5,18,1 3,4,6,7,8,1<br>9,21,22,24 7,20,23 | 4  | O70417,P06911,P22273,Q4G075                                                                                                                        |
| 2529 | 1,2,5,18,1 3,4,6,7,8,1<br>9,21,23,24 7,20,22 | 6  | O70417,P06911,P22273,P35280,Q4G075,Q99041                                                                                                          |
| 2530 | 1,2,5,18,1 3,4,6,7,8,1<br>9,22,23,24 7,20,21 | 21 | D4A5U3,O70417,P00507,P00714,P00762,P02780,P06761,P06911,P11598,P13676,P22273,P22282,P26772,Q4G075,Q5M8C6,Q62946,Q63617,Q9EQS0,Q9QX74,Q9R0T3,Q9WTT6 |
| 2531 | 1,2,5,18,2 3,4,6,7,8,1<br>0,21,22,23 7,19,24 | 4  | O70417,P00714,P22282,Q03191                                                                                                                        |
| 2532 | 1,2,5,18,2 3,4,6,7,8,1<br>0,21,22,24 7,19,23 | 3  | O70417,P20761,P50115                                                                                                                               |

|      |                                              |                                                                                                                                                            |
|------|----------------------------------------------|------------------------------------------------------------------------------------------------------------------------------------------------------------|
| 2533 | 1,2,5,18,2 3,4,6,7,8,1<br>0,21,23,24 7,19,22 | 5 O70417,P35280,Q5QE79,Q99041,Q9QZK9                                                                                                                       |
| 2534 | 1,2,5,18,2 3,4,6,7,8,1<br>0,22,23,24 7,19,21 | 9 O70417,P00714,P04355,P20646,P22282,Q5QE79,Q99041,Q9EQS0,Q9QX74                                                                                           |
| 2535 | 1,2,5,18,2 3,4,6,7,8,1<br>1,22,23,24 7,19,20 | 18 D4A5U3,O70417,P00714,P02780,P06761,P06911,P11598,P13676,P20646,P22273,P22282,P3637<br>4,Q4G075,Q63617,Q99041,Q9EQS0,Q9R0T3,Q9WTT6                       |
| 2536 | 1,2,5,19,2 3,4,6,7,8,1<br>0,21,22,23 7,18,24 | 1 O70417                                                                                                                                                   |
| 2537 | 1,2,5,19,2 3,4,6,7,8,1<br>0,21,22,24 7,18,23 | 3 O70417,O70594,P20761                                                                                                                                     |
| 2538 | 1,2,5,19,2 3,4,6,7,8,1<br>0,21,23,24 7,18,22 | 5 O70417,P14173,P23739,P35280,Q99041                                                                                                                       |
| 2539 | 1,2,5,19,2 3,4,6,7,8,1<br>0,22,23,24 7,18,21 | 7 O70417,P02625,P22273,P23739,P26772,Q5QE79,Q9QX74                                                                                                         |
| 2540 | 1,2,5,19,2 3,4,6,7,8,1<br>1,22,23,24 7,18,20 | 8 O70417,P02780,P06911,P12020,P13676,P22273,P22282,Q4G075                                                                                                  |
| 2541 | 1,2,5,20,2 3,4,6,7,8,1<br>1,22,23,24 7,18,19 | 5 O70417,P20646,P22282,Q5QE79,Q9QX74                                                                                                                       |
| 2542 | 1,2,6,7,8,1 3,4,5,20,2<br>7,18,19 1,22,23,24 | 6 iRT-Kit_WR_fusion,P08649,P20766,P31044,Q66H69,Q68G31                                                                                                     |
| 2543 | 1,2,6,7,8,1 3,4,5,19,2<br>7,18,20 1,22,23,24 | iRT-<br>14 Kit_WR_fusion,P06911,P12020,P13432,P19629,P25809,P31044,P47727,P50280,P55091,Q5GRG2<br>,Q78P75,Q91ZS3,Q9JHB9                                    |
| 2544 | 1,2,6,7,8,1 3,4,5,19,2<br>7,18,21 0,22,23,24 | 7 iRT-Kit_WR_fusion,P02631,P05539,P62804,Q00715,Q9QX74,Q9Z1F2                                                                                              |
| 2545 | 1,2,6,7,8,1 3,4,5,19,2<br>7,18,22 0,21,23,24 | 0                                                                                                                                                          |
| 2546 | 1,2,6,7,8,1 3,4,5,19,2<br>7,18,23 0,21,22,24 | 2 O70594,Q63598                                                                                                                                            |
| 2547 | 1,2,6,7,8,1 3,4,5,19,2<br>7,18,24 0,21,22,23 | 3 P13432,Q63598,Q9Z1F2                                                                                                                                     |
| 2548 | 1,2,6,7,8,1 3,4,5,18,2<br>7,19,20 1,22,23,24 | D4A5U3,iRT-<br>19 Kit_WR_fusion,O89117,P06911,P12020,P13676,P19629,P31044,P47727,P50280,P55091,Q5GRG<br>2,Q66H69,Q68G31,Q6P9T8,Q812E4,Q9JHB9,Q9JI85,Q9WTT6 |
| 2549 | 1,2,6,7,8,1 3,4,5,18,2<br>7,19,21 0,22,23,24 | iRT-<br>12 Kit_WR_fusion,P02631,P05539,P19629,P21674,P62804,Q00715,Q63474,Q66H69,Q68G31,Q9JI8<br>5,Q9QX74                                                  |
| 2550 | 1,2,6,7,8,1 3,4,5,18,2<br>7,19,22 0,21,23,24 | 5 iRT-Kit_WR_fusion,O89117,P15399,P97580,Q66H69                                                                                                            |
| 2551 | 1,2,6,7,8,1 3,4,5,18,2<br>7,19,23 0,21,22,24 | 4 iRT-Kit_WR_fusion,P21674,Q66H69,Q8CJD3                                                                                                                   |

|      |                        |                          |                                                                                                                                                                                        |
|------|------------------------|--------------------------|----------------------------------------------------------------------------------------------------------------------------------------------------------------------------------------|
| 2552 | 1,2,6,7,8,1<br>7,19,24 | 3,4,5,18,2<br>0,21,22,23 | 5 iRT-Kit_WR_fusion,P97840,Q63474,Q66H69,Q68G31                                                                                                                                        |
| 2553 | 1,2,6,7,8,1<br>7,20,21 | 3,4,5,18,1<br>9,22,23,24 | D4A5U3,iRT-<br>23 Kit_WR_fusion,P02631,P05964,P06911,P09456,P12020,P19629,P22283,P25809,P31044,P47727,<br>P55091,P62804,P63029,Q00715,Q5GRG2,Q63474,Q78P75,Q812E4,Q9JHB9,Q9JI85,Q9WTT6 |
| 2554 | 1,2,6,7,8,1<br>7,20,22 | 3,4,5,18,1<br>9,21,23,24 | iRT-<br>12 Kit_WR_fusion,O89117,P06911,P12020,P19629,P31044,P50280,P55091,P63029,Q5GRG2,Q78P7<br>5,Q9JHB9                                                                              |
| 2555 | 1,2,6,7,8,1<br>7,20,23 | 3,4,5,18,1<br>9,21,22,24 | 8 iRT-Kit_WR_fusion,P06911,P12020,P19629,P31044,P55091,P63029,Q5GRG2                                                                                                                   |
| 2556 | 1,2,6,7,8,1<br>7,20,24 | 3,4,5,18,1<br>9,21,22,23 | iRT-<br>13 Kit_WR_fusion,P06911,P08723,P09456,P12020,P19629,P31044,P47727,Q5GRG2,Q68G31,Q78P7<br>5,Q812E4,Q9JHB9                                                                       |
| 2557 | 1,2,6,7,8,1<br>7,21,22 | 3,4,5,18,1<br>9,20,23,24 | 4 iRT-Kit_WR_fusion,P02631,P05539,P19629                                                                                                                                               |
| 2558 | 1,2,6,7,8,1<br>7,21,23 | 3,4,5,18,1<br>9,20,22,24 | 6 iRT-Kit_WR_fusion,P02631,P19629,P21674,Q63474,Q63598                                                                                                                                 |
| 2559 | 1,2,6,7,8,1<br>7,21,24 | 3,4,5,18,1<br>9,20,22,23 | 7 iRT-Kit_WR_fusion,P01039,P02631,P05539,P36860,Q63474,Q63598                                                                                                                          |
| 2560 | 1,2,6,7,8,1<br>7,22,23 | 3,4,5,18,1<br>9,20,21,24 | 5 iRT-Kit_WR_fusion,O54858,P97840,Q63532,Q99MH3                                                                                                                                        |
| 2561 | 1,2,6,7,8,1<br>7,22,24 | 3,4,5,18,1<br>9,20,21,23 | 2 iRT-Kit_WR_fusion,P97840                                                                                                                                                             |
| 2562 | 1,2,6,7,8,1<br>7,23,24 | 3,4,5,18,1<br>9,20,21,22 | 4 iRT-Kit_WR_fusion,P97840,Q63474,Q63598                                                                                                                                               |
| 2563 | 1,2,6,7,8,1<br>8,19,20 | 3,4,5,17,2<br>1,22,23,24 | iRT-<br>17 Kit_WR_fusion,P06911,P12020,P19629,P31044,P47727,P50280,P69897,Q5GRG2,Q66H69,Q68G<br>31,Q6P9T8,Q812E4,Q91ZS3,Q9JHB9,Q9JI85,Q9QW07                                           |
| 2564 | 1,2,6,7,8,1<br>8,19,21 | 3,4,5,17,2<br>0,22,23,24 | 10 iRT-Kit_WR_fusion,P02631,P19629,P31044,P62804,Q00715,Q66H69,Q68G31,Q91ZS3,Q9JI85                                                                                                    |
| 2565 | 1,2,6,7,8,1<br>8,19,22 | 3,4,5,17,2<br>0,21,23,24 | 3 iRT-Kit_WR_fusion,P15399,P97580                                                                                                                                                      |
| 2566 | 1,2,6,7,8,1<br>8,19,23 | 3,4,5,17,2<br>0,21,22,24 | 3 iRT-Kit_WR_fusion,P20766,P31044                                                                                                                                                      |
| 2567 | 1,2,6,7,8,1<br>8,19,24 | 3,4,5,17,2<br>0,21,22,23 | 4 iRT-Kit_WR_fusion,P20766,Q66H69,Q68G31                                                                                                                                               |
| 2568 | 1,2,6,7,8,1<br>8,20,21 | 3,4,5,17,1<br>9,22,23,24 | iRT-<br>22 Kit_WR_fusion,P01835,P02631,P06911,P12020,P19629,P22283,P25809,P31044,P47727,P50280,<br>P62804,P69897,Q00715,Q5GRG2,Q68G31,Q78P75,Q812E4,Q91ZS3,Q9JHB9,Q9JI85,Q9QW07        |



2569 1,2,6,7,8,1 3,4,5,17,1  
8,20,22 9,21,23,24

2570 1,2,6,7,8,1 3,4,5,17,1  
8,20,23 9,21,22,24

2571 1,2,6,7,8,1 3,4,5,17,1  
8,20,24 9,21,22,23

2572 1,2,6,7,8,1 3,4,5,17,1  
8,21,22 9,20,23,24

2573 1,2,6,7,8,1 3,4,5,17,1  
8,21,23 9,20,22,24

2574 1,2,6,7,8,1 3,4,5,17,1  
8,21,24 9,20,22,23

2575 1,2,6,7,8,1 3,4,5,17,1  
8,22,23 9,20,21,24

2576 1,2,6,7,8,1 3,4,5,17,1  
8,22,24 9,20,21,23

2577 1,2,6,7,8,1 3,4,5,17,1  
8,23,24 9,20,21,22

2578 1,2,6,7,8,1 3,4,5,17,1  
9,20,21 8,22,23,24

2579 1,2,6,7,8,1 3,4,5,17,1  
9,20,22 8,21,23,24

2580 1,2,6,7,8,1 3,4,5,17,1  
9,20,23 8,21,22,24

2581 1,2,6,7,8,1 3,4,5,17,1  
9,20,24 8,21,22,23

2582 1,2,6,7,8,1 3,4,5,17,1  
9,21,22 8,20,23,24

2583 1,2,6,7,8,1 3,4,5,17,1  
9,21,23 8,20,22,24

2584 1,2,6,7,8,1 3,4,5,17,1  
9,21,24 8,20,22,23

2585 1,2,6,7,8,1 3,4,5,17,1  
9,22,23 8,20,21,24

iRT-  
11 Kit\_WR\_fusion,P06911,P12020,P15399,P19629,P31044,P50280,Q5GRG2,Q6P9T8,Q91ZS3,Q9JHB9

10 iRT-Kit\_WR\_fusion,P06911,P12020,P19629,P31044,P50280,Q5GRG2,Q62894,Q91ZS3,Q99MH3

iRT-  
13 Kit\_WR\_fusion,P06911,P12020,P19629,P31044,P50280,Q5GRG2,Q68G31,Q78P75,Q812E4,Q91ZS3,Q9JHB9,Q9QW07

7 iRT-Kit\_WR\_fusion,P01835,P02631,P19629,P23739,Q00715,Q91ZS3

7 iRT-Kit\_WR\_fusion,P01835,P02631,P19629,Q00715,Q63532,Q91ZS3

9 iRT-Kit\_WR\_fusion,P01835,P02631,P36860,Q00715,Q63474,Q68G31,Q91ZS3,Q9Z1F2

5 iRT-Kit\_WR\_fusion,O54858,P19629,Q63532,Q99MH3

1 O54858

3 P20766,Q3ZAV1,Q63598

iRT-  
31 Kit\_WR\_fusion,O35547,P02631,P02780,P05369,P05964,P06761,P06911,P08723,P09456,P12020,P19629,P22283,P24368,P31044,P46462,P47727,P50280,P62804,Q00715,Q5GRG2,Q63493,Q63617,Q66H69,Q68G31,Q78P75,Q812E4,Q9JHB9,Q9JI85,Q9QW07,Q9WTT6

iRT-  
13 Kit\_WR\_fusion,P06911,P12020,P15399,P19218,P19629,P31044,P50280,Q5GRG2,Q68G31,Q6P9T8,Q9JI85,Q9QW07

iRT-  
12 Kit\_WR\_fusion,P06911,P12020,P19629,P31044,P50280,Q5GRG2,Q68G31,Q812E4,Q8CJD3,Q9JI85,Q9QW07

iRT-  
15 Kit\_WR\_fusion,P06911,P08723,P09456,P12020,P19629,P31044,P50280,Q5GRG2,Q63617,Q68G31,Q812E4,Q9JHB9,Q9JI85,Q9QW07

4 iRT-Kit\_WR\_fusion,P02631,P19629,Q66H69

6 iRT-Kit\_WR\_fusion,P02631,P19629,P21674,Q63474,Q66H69

7 iRT-Kit\_WR\_fusion,P02631,P19629,Q63474,Q66H69,Q68G31,Q9JI85

4 iRT-Kit\_WR\_fusion,O54858,P19629,Q63532

|      |                         |                          |                                                                                                                                                                             |
|------|-------------------------|--------------------------|-----------------------------------------------------------------------------------------------------------------------------------------------------------------------------|
| 2586 | 1,2,6,7,8,1<br>9,22,24  | 3,4,5,17,1<br>8,20,21,23 | 3 iRT-Kit_WR_fusion,P15399,Q68G31                                                                                                                                           |
| 2587 | 1,2,6,7,8,1<br>9,23,24  | 3,4,5,17,1<br>8,20,21,22 | 3 iRT-Kit_WR_fusion,Q63474,Q68G31                                                                                                                                           |
| 2588 | 1,2,6,7,8,2<br>0,21,22  | 3,4,5,17,1<br>8,19,23,24 | iRT-<br>12 Kit_WR_fusion,P01835,P02631,P06911,P12020,P19629,P50280,Q5GRG2,Q78P75,Q91ZS3,Q9JHB9,Q9JI85                                                                       |
| 2589 | 1,2,6,7,8,2<br>0,21,23  | 3,4,5,17,1<br>8,19,22,24 | iRT-<br>11 Kit_WR_fusion,P01835,P02631,P06911,P12020,P19629,Q5GRG2,Q78P75,Q812E4,Q91ZS3,Q9JI85                                                                              |
| 2590 | 1,2,6,7,8,2<br>0,21,24  | 3,4,5,17,1<br>8,19,22,23 | iRT-<br>22 Kit_WR_fusion,P01835,P02631,P02782,P06911,P08723,P09456,P12020,P19629,P22283,P30120,P50280,Q5GRG2,Q63474,Q68G31,Q6AYR9,Q78P75,Q812E4,Q91ZS3,Q9JHB9,Q9JI85,Q9QW07 |
| 2591 | 1,2,6,7,8,2<br>0,22,23  | 3,4,5,17,1<br>8,19,21,24 | 8 iRT-Kit_WR_fusion,P06911,P12020,P19629,P50280,Q5GRG2,Q62894,Q99MH3                                                                                                        |
| 2592 | 1,2,6,7,8,2<br>0,22,24  | 3,4,5,17,1<br>8,19,21,23 | iRT-<br>11 Kit_WR_fusion,P01835,P06911,P12020,P15399,P19629,P22006,P50280,Q5GRG2,Q9JHB9,Q9QW07                                                                              |
| 2593 | 1,2,6,7,8,2<br>0,23,24  | 3,4,5,17,1<br>8,19,21,22 | 9 iRT-Kit_WR_fusion,P01835,P06911,P12020,P19629,Q5GRG2,Q812E4,Q9JHB9,Q9QW07                                                                                                 |
| 2594 | 1,2,6,7,8,2<br>1,22,23  | 3,4,5,17,1<br>8,19,20,24 | 6 iRT-Kit_WR_fusion,O54858,P01835,P19629,Q62714,Q63532                                                                                                                      |
| 2595 | 1,2,6,7,8,2<br>1,22,24  | 3,4,5,17,1<br>8,19,20,23 | 5 iRT-Kit_WR_fusion,P01835,P19629,Q62714,Q63474                                                                                                                             |
| 2596 | 1,2,6,7,8,2<br>1,23,24  | 3,4,5,17,1<br>8,19,20,22 | 7 iRT-Kit_WR_fusion,P01835,P19629,P36860,Q62714,Q63474,Q63598                                                                                                               |
| 2597 | 1,2,6,7,8,2<br>2,23,24  | 3,4,5,17,1<br>8,19,20,21 | 6 iRT-Kit_WR_fusion,O54858,P97840,Q62714,Q63532,Q6P6R2                                                                                                                      |
| 2598 | 1,2,6,7,17,<br>18,19,20 | 3,4,5,8,21,<br>22,23,24  | 4 P00762,P30919,P55091,Q5GRG2                                                                                                                                               |
| 2599 | 1,2,6,7,17,<br>18,19,21 | 3,4,5,8,20,<br>22,23,24  | 3 P00762,P05539,P23739                                                                                                                                                      |
| 2600 | 1,2,6,7,17,<br>18,19,22 | 3,4,5,8,20,<br>21,23,24  | 2 P00762,P23739                                                                                                                                                             |
| 2601 | 1,2,6,7,17,<br>18,19,23 | 3,4,5,8,20,<br>21,22,24  | 2 P00762,Q10743                                                                                                                                                             |
| 2602 | 1,2,6,7,17,<br>18,19,24 | 3,4,5,8,20,<br>21,22,23  | 1 P00762                                                                                                                                                                    |
| 2603 | 1,2,6,7,17,<br>18,20,21 | 3,4,5,8,19,<br>22,23,24  | 7 P00507,P01835,P05539,P25809,P55091,P63029,Q5GRG2                                                                                                                          |

|      |                                              |                                                    |
|------|----------------------------------------------|----------------------------------------------------|
| 2604 | 1,2,6,7,17, 3,4,5,8,19,<br>18,20,22 21,23,24 | 4 P00762,P01835,P55091,Q5GRG2                      |
| 2605 | 1,2,6,7,17, 3,4,5,8,19,<br>18,20,23 21,22,24 | 5 P00762,P01835,P30919,P55091,Q5GRG2               |
| 2606 | 1,2,6,7,17, 3,4,5,8,19,<br>18,20,24 21,22,23 | 2 P01835,Q5GRG2                                    |
| 2607 | 1,2,6,7,17, 3,4,5,8,19,<br>18,21,22 20,23,24 | 4 P00762,P01835,P05539,P23739                      |
| 2608 | 1,2,6,7,17, 3,4,5,8,19,<br>18,21,23 20,22,24 | 3 P00762,P01835,P19814                             |
| 2609 | 1,2,6,7,17, 3,4,5,8,19,<br>18,21,24 20,22,23 | 5 P01039,P01835,P05539,P36860,Q6AY61               |
| 2610 | 1,2,6,7,17, 3,4,5,8,19,<br>18,22,23 20,21,24 | 2 P00762,Q9EQS0                                    |
| 2611 | 1,2,6,7,17, 3,4,5,8,19,<br>18,22,24 20,21,23 | 2 D3ZUC6,P00762                                    |
| 2612 | 1,2,6,7,17, 3,4,5,8,19,<br>18,23,24 20,21,22 | 2 O88797,P00762                                    |
| 2613 | 1,2,6,7,17, 3,4,5,8,18,<br>19,20,21 22,23,24 | 7 P01835,P05539,P22283,P63029,Q5GRG2,Q63617,Q68G31 |
| 2614 | 1,2,6,7,17, 3,4,5,8,18,<br>19,20,22 21,23,24 | 3 O89117,P00762,Q5GRG2                             |
| 2615 | 1,2,6,7,17, 3,4,5,8,18,<br>19,20,23 21,22,24 | 2 O89117,P00762                                    |
| 2616 | 1,2,6,7,17, 3,4,5,8,18,<br>19,20,24 21,22,23 | 4 O89117,P54921,Q5GRG2,Q68G31                      |
| 2617 | 1,2,6,7,17, 3,4,5,8,18,<br>19,21,22 20,23,24 | 3 P00762,P05539,Q9R168                             |
| 2618 | 1,2,6,7,17, 3,4,5,8,18,<br>19,21,23 20,22,24 | 5 P00762,P05539,P21674,Q63474,Q9R168               |
| 2619 | 1,2,6,7,17, 3,4,5,8,18,<br>19,21,24 20,22,23 | 7 P01039,P05539,P54921,Q63474,Q68G31,Q6AY61,Q9R168 |
| 2620 | 1,2,6,7,17, 3,4,5,8,18,<br>19,22,23 20,21,24 | 4 O89117,P00762,Q9EQS0,Q9R168                      |
| 2621 | 1,2,6,7,17, 3,4,5,8,18,<br>19,22,24 20,21,23 | 4 D3ZUC6,O89117,P00762,Q9R168                      |
| 2622 | 1,2,6,7,17, 3,4,5,8,18,<br>19,23,24 20,21,22 | 1 P00762                                           |
| 2623 | 1,2,6,7,17, 3,4,5,8,18,<br>20,21,22 19,23,24 | 3 P01835,P05539,P63029                             |

|      |                                              |                                                           |
|------|----------------------------------------------|-----------------------------------------------------------|
| 2624 | 1,2,6,7,17, 3,4,5,8,18,<br>20,21,23 19,22,24 | 3 P01835,P55091,P63029                                    |
| 2625 | 1,2,6,7,17, 3,4,5,8,18,<br>20,21,24 19,22,23 | 4 P01835,P05539,P63029,Q6AY61                             |
| 2626 | 1,2,6,7,17, 3,4,5,8,18,<br>20,22,23 19,21,24 | 4 O89117,P00762,P01835,P63029                             |
| 2627 | 1,2,6,7,17, 3,4,5,8,18,<br>20,22,24 19,21,23 | 4 O35077,O89117,P01835,P22006                             |
| 2628 | 1,2,6,7,17, 3,4,5,8,18,<br>20,23,24 19,21,22 | 1 P01835                                                  |
| 2629 | 1,2,6,7,17, 3,4,5,8,18,<br>21,22,23 19,20,24 | 3 P01835,P05539,Q9R168                                    |
| 2630 | 1,2,6,7,17, 3,4,5,8,18,<br>21,22,24 19,20,23 | 5 P01039,P01835,P05539,P36860,Q9R168                      |
| 2631 | 1,2,6,7,17, 3,4,5,8,18,<br>21,23,24 19,20,22 | 4 P01835,P36860,Q63474,Q9R168                             |
| 2632 | 1,2,6,7,17, 3,4,5,8,18,<br>22,23,24 19,20,21 | 8 D3ZUC6,P00762,P01835,P47967,P97840,Q5I0D1,Q9EQS0,Q9R168 |
| 2633 | 1,2,6,7,18, 3,4,5,8,17,<br>19,20,21 22,23,24 | 5 P01835,P22283,Q5PQL7,Q63617,Q68G31                      |
| 2634 | 1,2,6,7,18, 3,4,5,8,17,<br>19,20,22 21,23,24 | 2 P00762,Q5PQL7                                           |
| 2635 | 1,2,6,7,18, 3,4,5,8,17,<br>19,20,23 21,22,24 | 1 P00762                                                  |
| 2636 | 1,2,6,7,18, 3,4,5,8,17,<br>19,20,24 21,22,23 | 3 P00762,P01835,Q68G31                                    |
| 2637 | 1,2,6,7,18, 3,4,5,8,17,<br>19,21,22 20,23,24 | 5 P00762,P01835,P23739,P36376,Q5PQL7                      |
| 2638 | 1,2,6,7,18, 3,4,5,8,17,<br>19,21,23 20,22,24 | 2 P00762,P01835                                           |
| 2639 | 1,2,6,7,18, 3,4,5,8,17,<br>19,21,24 20,22,23 | 3 P01835,P36376,Q68G31                                    |
| 2640 | 1,2,6,7,18, 3,4,5,8,17,<br>19,22,23 20,21,24 | 4 P00762,Q6IG02,Q811M5,Q9EQS0                             |
| 2641 | 1,2,6,7,18, 3,4,5,8,17,<br>19,22,24 20,21,23 | 3 P00762,P36376,Q9EQS0                                    |
| 2642 | 1,2,6,7,18, 3,4,5,8,17,<br>19,23,24 20,21,22 | 2 P00762,P20766                                           |
| 2643 | 1,2,6,7,18, 3,4,5,8,17,<br>20,21,22 19,23,24 | 2 P01835,Q5PQL7                                           |

|      |                                              |                                                           |
|------|----------------------------------------------|-----------------------------------------------------------|
| 2644 | 1,2,6,7,18, 3,4,5,8,17,<br>20,21,23 19,22,24 | 2 P01835,P19629                                           |
| 2645 | 1,2,6,7,18, 3,4,5,8,17,<br>20,21,24 19,22,23 | 2 P01835,Q68G31                                           |
| 2646 | 1,2,6,7,18, 3,4,5,8,17,<br>20,22,23 19,21,24 | 5 P00762,P01835,P04355,Q99MH3,Q9EQS0                      |
| 2647 | 1,2,6,7,18, 3,4,5,8,17,<br>20,22,24 19,21,23 | 2 P01835,P22006                                           |
| 2648 | 1,2,6,7,18, 3,4,5,8,17,<br>20,23,24 19,21,22 | 1 P01835                                                  |
| 2649 | 1,2,6,7,18, 3,4,5,8,17,<br>21,22,23 19,20,24 | 2 P01835,Q9EQS0                                           |
| 2650 | 1,2,6,7,18, 3,4,5,8,17,<br>21,22,24 19,20,23 | 3 P01835,P23739,P36376                                    |
| 2651 | 1,2,6,7,18, 3,4,5,8,17,<br>21,23,24 19,20,22 | 1 P01835                                                  |
| 2652 | 1,2,6,7,18, 3,4,5,8,17,<br>22,23,24 19,20,21 | 8 D3ZUC6,P00762,P01835,P06760,P13676,Q6P6R2,Q9EQS0,Q9WVK7 |
| 2653 | 1,2,6,7,19, 3,4,5,8,17,<br>20,21,22 18,23,24 | 3 P01835,Q5PQL7,Q63617                                    |
| 2654 | 1,2,6,7,19, 3,4,5,8,17,<br>20,21,23 18,22,24 | 2 P01835,P19629                                           |
| 2655 | 1,2,6,7,19, 3,4,5,8,17,<br>20,21,24 18,22,23 | 7 O35547,P01835,P05369,P08723,P22283,Q63617,Q68G31        |
| 2656 | 1,2,6,7,19, 3,4,5,8,17,<br>20,22,23 18,21,24 | 2 P00762,P01835                                           |
| 2657 | 1,2,6,7,19, 3,4,5,8,17,<br>20,22,24 18,21,23 | 3 P01835,P22006,Q68G31                                    |
| 2658 | 1,2,6,7,19, 3,4,5,8,17,<br>20,23,24 18,21,22 | 3 P01835,P14173,Q68G31                                    |
| 2659 | 1,2,6,7,19, 3,4,5,8,17,<br>21,22,23 18,20,24 | 3 P00762,P01835,Q9R168                                    |
| 2660 | 1,2,6,7,19, 3,4,5,8,17,<br>21,22,24 18,20,23 | 3 P01835,P36376,Q9R168                                    |
| 2661 | 1,2,6,7,19, 3,4,5,8,17,<br>21,23,24 18,20,22 | 4 P01835,P14173,Q63474,Q6DGG1                             |
| 2662 | 1,2,6,7,19, 3,4,5,8,17,<br>22,23,24 18,20,21 | 5 P00762,P01835,P26772,Q811M5,Q9EQS0                      |
| 2663 | 1,2,6,7,20, 3,4,5,8,17,<br>21,22,23 18,19,24 | 2 P01835,P19629                                           |

|      |                                              |    |                                                                                         |
|------|----------------------------------------------|----|-----------------------------------------------------------------------------------------|
| 2664 | 1,2,6,7,20, 3,4,5,8,17,<br>21,22,24 18,19,23 | 1  | P01835                                                                                  |
| 2665 | 1,2,6,7,20, 3,4,5,8,17,<br>21,23,24 18,19,22 | 1  | P01835                                                                                  |
| 2666 | 1,2,6,7,20, 3,4,5,8,17,<br>22,23,24 18,19,21 | 3  | P01835,P22006,Q9QX74                                                                    |
| 2667 | 1,2,6,7,21, 3,4,5,8,17,<br>22,23,24 18,19,20 | 4  | P01835,P13676,Q62714,Q9R168                                                             |
| 2668 | 1,2,6,8,17, 3,4,5,7,21,<br>18,19,20 22,23,24 | 12 | B0LT89,O89117,P06911,P08649,P12020,P13432,P25809,P47727,P55091,Q5GRG2,Q68G31,Q9JI<br>85 |
| 2669 | 1,2,6,8,17, 3,4,5,7,20,<br>18,19,21 22,23,24 | 3  | P08649,Q66H69,Q68G31                                                                    |
| 2670 | 1,2,6,8,17, 3,4,5,7,20,<br>18,19,22 21,23,24 | 5  | P08649,P15399,P97580,P97840,Q68G31                                                      |
| 2671 | 1,2,6,8,17, 3,4,5,7,20,<br>18,19,23 21,22,24 | 3  | P08649,P97840,Q68G31                                                                    |
| 2672 | 1,2,6,8,17, 3,4,5,7,20,<br>18,19,24 21,22,23 | 3  | P08649,P97840,Q68G31                                                                    |
| 2673 | 1,2,6,8,17, 3,4,5,7,19,<br>18,20,21 22,23,24 | 10 | P02631,P06911,P12020,P25809,P47727,P55091,P63029,Q5GRG2,Q68G31,Q9JI85                   |
| 2674 | 1,2,6,8,17, 3,4,5,7,19,<br>18,20,22 21,23,24 | 8  | O89117,P06911,P08649,P12020,P15399,P55091,P63029,Q5GRG2                                 |
| 2675 | 1,2,6,8,17, 3,4,5,7,19,<br>18,20,23 21,22,24 | 7  | P06911,P08649,P12020,P55091,P63029,Q5GRG2,Q99MH3                                        |
| 2676 | 1,2,6,8,17, 3,4,5,7,19,<br>18,20,24 21,22,23 | 8  | P06911,P08649,P12020,P13432,P47727,P97840,Q5GRG2,Q68G31                                 |
| 2677 | 1,2,6,8,17, 3,4,5,7,19,<br>18,21,22 20,23,24 | 3  | P08649,P10758,P97840                                                                    |
| 2678 | 1,2,6,8,17, 3,4,5,7,19,<br>18,21,23 20,22,24 | 1  | P97840                                                                                  |
| 2679 | 1,2,6,8,17, 3,4,5,7,19,<br>18,21,24 20,22,23 | 2  | P97840,Q68G31                                                                           |
| 2680 | 1,2,6,8,17, 3,4,5,7,19,<br>18,22,23 20,21,24 | 5  | P08649,P47967,P97840,Q5I0D1,Q99MH3                                                      |
| 2681 | 1,2,6,8,17, 3,4,5,7,19,<br>18,22,24 20,21,23 | 6  | D3ZUC6,P08649,P10758,P47967,P97840,Q5I0D1                                               |
| 2682 | 1,2,6,8,17, 3,4,5,7,19,<br>18,23,24 20,21,22 | 4  | P08649,P47967,P97840,Q5I0D1                                                             |
| 2683 | 1,2,6,8,17, 3,4,5,7,18,<br>19,20,21 22,23,24 | 9  | B0LT89,O89117,P25809,P47727,P63029,Q5GRG2,Q68G31,Q6P6R2,Q9JI85                          |

|      |                                              |                                                           |
|------|----------------------------------------------|-----------------------------------------------------------|
| 2684 | 1,2,6,8,17, 3,4,5,7,18,<br>19,20,22 21,23,24 | 6 O89117,P12020,P15399,P63029,Q5GRG2,Q68G31               |
| 2685 | 1,2,6,8,17, 3,4,5,7,18,<br>19,20,23 21,22,24 | 6 O89117,P63029,P97840,Q5GRG2,Q68G31,Q8CJD3               |
| 2686 | 1,2,6,8,17, 3,4,5,7,18,<br>19,20,24 21,22,23 | 6 O89117,P47727,P97840,Q5GRG2,Q68G31,Q9JI85               |
| 2687 | 1,2,6,8,17, 3,4,5,7,18,<br>19,21,22 20,23,24 | 3 O89117,P97840,Q68G31                                    |
| 2688 | 1,2,6,8,17, 3,4,5,7,18,<br>19,21,23 20,22,24 | 4 P21674,P97840,Q63474,Q68G31                             |
| 2689 | 1,2,6,8,17, 3,4,5,7,18,<br>19,21,24 20,22,23 | 4 P97840,Q63474,Q66H69,Q68G31                             |
| 2690 | 1,2,6,8,17, 3,4,5,7,18,<br>19,22,23 20,21,24 | 4 O89117,P00507,P47967,P97840                             |
| 2691 | 1,2,6,8,17, 3,4,5,7,18,<br>19,22,24 20,21,23 | 7 D3ZUC6,O89117,P00507,P15399,P47967,P97840,Q68G31        |
| 2692 | 1,2,6,8,17, 3,4,5,7,18,<br>19,23,24 20,21,22 | 3 P47967,P97840,Q68G31                                    |
| 2693 | 1,2,6,8,17, 3,4,5,7,18,<br>20,21,22 19,23,24 | 5 O89117,P19629,P25809,P63029,Q5GRG2                      |
| 2694 | 1,2,6,8,17, 3,4,5,7,18,<br>20,21,23 19,22,24 | 5 P19629,P55091,P63029,P97840,Q5GRG2                      |
| 2695 | 1,2,6,8,17, 3,4,5,7,18,<br>20,21,24 19,22,23 | 8 P30120,P47727,P63029,P97840,Q5GRG2,Q63474,Q68G31,Q9JI85 |
| 2696 | 1,2,6,8,17, 3,4,5,7,18,<br>20,22,23 19,21,24 | 5 O89117,P63029,P97840,Q5GRG2,Q99MH3                      |
| 2697 | 1,2,6,8,17, 3,4,5,7,18,<br>20,22,24 19,21,23 | 8 O89117,P06911,P12020,P15399,P63029,P97840,Q5GRG2,Q68G31 |
| 2698 | 1,2,6,8,17, 3,4,5,7,18,<br>20,23,24 19,21,22 | 4 P63029,P97840,Q5GRG2,Q68G31                             |
| 2699 | 1,2,6,8,17, 3,4,5,7,18,<br>21,22,23 19,20,24 | 3 P47967,P97840,Q63532                                    |
| 2700 | 1,2,6,8,17, 3,4,5,7,18,<br>21,22,24 19,20,23 | 3 P10758,P97840,Q63474                                    |
| 2701 | 1,2,6,8,17, 3,4,5,7,18,<br>21,23,24 19,20,22 | 3 P47967,P97840,Q63474                                    |
| 2702 | 1,2,6,8,17, 3,4,5,7,18,<br>22,23,24 19,20,21 | 6 D3ZUC6,P00507,P07335,P47967,P97840,Q5I0D1               |
| 2703 | 1,2,6,8,18, 3,4,5,7,17,<br>19,20,21 22,23,24 | 8 P02631,P19629,P25809,P47727,P50280,Q5GRG2,Q68G31,Q9JI85 |

|      |                                              |                                                                          |
|------|----------------------------------------------|--------------------------------------------------------------------------|
| 2704 | 1,2,6,8,18, 3,4,5,7,17,<br>19,20,22 21,23,24 | 5 P12020,P15399,P50280,Q5GRG2,Q68G31                                     |
| 2705 | 1,2,6,8,18, 3,4,5,7,17,<br>19,20,23 21,22,24 | 2 Q5GRG2,Q68G31                                                          |
| 2706 | 1,2,6,8,18, 3,4,5,7,17,<br>19,20,24 21,22,23 | 6 P12020,P50280,Q5GRG2,Q68G31,Q9JI85,Q9QW07                              |
| 2707 | 1,2,6,8,18, 3,4,5,7,17,<br>19,21,22 20,23,24 | 2 P15399,Q68G31                                                          |
| 2708 | 1,2,6,8,18, 3,4,5,7,17,<br>19,21,23 20,22,24 | 1 Q68G31                                                                 |
| 2709 | 1,2,6,8,18, 3,4,5,7,17,<br>19,21,24 20,22,23 | 1 Q68G31                                                                 |
| 2710 | 1,2,6,8,18, 3,4,5,7,17,<br>19,22,23 20,21,24 | 5 P00507,P15399,Q6AY61,Q811M5,Q99MH3                                     |
| 2711 | 1,2,6,8,18, 3,4,5,7,17,<br>19,22,24 20,21,23 | 4 P00507,P15399,P97840,Q68G31                                            |
| 2712 | 1,2,6,8,18, 3,4,5,7,17,<br>19,23,24 20,21,22 | 2 P97840,Q68G31                                                          |
| 2713 | 1,2,6,8,18, 3,4,5,7,17,<br>20,21,22 19,23,24 | 7 P12020,P19629,P25809,P54921,Q5GRG2,Q68G31,Q91ZS3                       |
| 2714 | 1,2,6,8,18, 3,4,5,7,17,<br>20,21,23 19,22,24 | 5 P19629,P54921,Q5GRG2,Q68G31,Q91ZS3                                     |
| 2715 | 1,2,6,8,18, 3,4,5,7,17,<br>20,21,24 19,22,23 | 5 P12020,Q5GRG2,Q68G31,Q91ZS3,Q9JI85                                     |
| 2716 | 1,2,6,8,18, 3,4,5,7,17,<br>20,22,23 19,21,24 | 6 P04355,P12020,P54921,Q5GRG2,Q6AY61,Q99MH3                              |
| 2717 | 1,2,6,8,18, 3,4,5,7,17,<br>20,22,24 19,21,23 | 5 P12020,P15399,P22006,Q5GRG2,Q68G31                                     |
| 2718 | 1,2,6,8,18, 3,4,5,7,17,<br>20,23,24 19,21,22 | 4 P97840,Q5GRG2,Q5QE79,Q68G31                                            |
| 2719 | 1,2,6,8,18, 3,4,5,7,17,<br>21,22,23 19,20,24 | 3 P54921,Q63532,Q99MH3                                                   |
| 2720 | 1,2,6,8,18, 3,4,5,7,17,<br>21,22,24 19,20,23 | 2 P97840,Q68G31                                                          |
| 2721 | 1,2,6,8,18, 3,4,5,7,17,<br>21,23,24 19,20,22 | 3 P20646,P97840,Q68G31                                                   |
| 2722 | 1,2,6,8,18, 3,4,5,7,17,<br>22,23,24 19,20,21 | 10 P00507,P06760,P13676,P20646,P47967,P97840,Q5I0D1,Q63532,Q6P6R2,Q99MH3 |
| 2723 | 1,2,6,8,19, 3,4,5,7,17,<br>20,21,22 18,23,24 | 5 P15399,P19629,Q5GRG2,Q68G31,Q9JI85                                     |



|      |                                              |                                                                  |
|------|----------------------------------------------|------------------------------------------------------------------|
| 2724 | 1,2,6,8,19, 3,4,5,7,17,<br>20,21,23 18,22,24 | 3 P19629,Q68G31,Q9JI85                                           |
| 2725 | 1,2,6,8,19, 3,4,5,7,17,<br>20,21,24 18,22,23 | 9 O35547,P08723,P09456,P30120,Q5GRG2,Q68G31,Q812E4,Q9JI85,Q9QW07 |
| 2726 | 1,2,6,8,19, 3,4,5,7,17,<br>20,22,23 18,21,24 | 4 P15399,P19629,Q68G31,Q99MH3                                    |
| 2727 | 1,2,6,8,19, 3,4,5,7,17,<br>20,22,24 18,21,23 | 4 P15399,P22006,Q5GRG2,Q68G31                                    |
| 2728 | 1,2,6,8,19, 3,4,5,7,17,<br>20,23,24 18,21,22 | 2 P97840,Q68G31                                                  |
| 2729 | 1,2,6,8,19, 3,4,5,7,17,<br>21,22,23 18,20,24 | 3 P97840,Q63532,Q68G31                                           |
| 2730 | 1,2,6,8,19, 3,4,5,7,17,<br>21,22,24 18,20,23 | 3 P30919,P97840,Q68G31                                           |
| 2731 | 1,2,6,8,19, 3,4,5,7,17,<br>21,23,24 18,20,22 | 3 P97840,Q63474,Q68G31                                           |
| 2732 | 1,2,6,8,19, 3,4,5,7,17,<br>22,23,24 18,20,21 | 6 P00507,P26772,P47967,P97840,Q68G31,Q811M5                      |
| 2733 | 1,2,6,8,20, 3,4,5,7,17,<br>21,22,23 18,19,24 | 4 P19629,P54921,Q63532,Q99MH3                                    |
| 2734 | 1,2,6,8,20, 3,4,5,7,17,<br>21,22,24 18,19,23 | 4 P01835,P19629,Q5GRG2,Q68G31                                    |
| 2735 | 1,2,6,8,20, 3,4,5,7,17,<br>21,23,24 18,19,22 | 6 P01835,P19629,P97840,Q63474,Q68G31,Q812E4                      |
| 2736 | 1,2,6,8,20, 3,4,5,7,17,<br>22,23,24 18,19,21 | 4 P22006,P97840,Q5QE79,Q99MH3                                    |
| 2737 | 1,2,6,8,21, 3,4,5,7,17,<br>22,23,24 18,19,20 | 5 P20646,P30919,P47967,P97840,Q63532                             |
| 2738 | 1,2,6,17,1 3,4,5,7,8,2<br>8,19,20,21 2,23,24 | 7 B0LT89,P20761,P25809,P35280,P63029,Q68G31,Q6P6R2               |
| 2739 | 1,2,6,17,1 3,4,5,7,8,2<br>8,19,20,22 1,23,24 | 4 O89117,P00762,P08649,P20761                                    |
| 2740 | 1,2,6,17,1 3,4,5,7,8,2<br>8,19,20,23 1,22,24 | 3 P00762,P35280,Q68G31                                           |
| 2741 | 1,2,6,17,1 3,4,5,7,8,2<br>8,19,20,24 1,22,23 | 3 P20761,P35280,Q68G31                                           |
| 2742 | 1,2,6,17,1 3,4,5,7,8,2<br>8,19,21,22 0,23,24 | 3 P05539,P23739,Q4G075                                           |
| 2743 | 1,2,6,17,1 3,4,5,7,8,2<br>8,19,21,23 0,22,24 | 3 O70417,P35280,Q4G075                                           |

|      |                                              |                                                                                               |
|------|----------------------------------------------|-----------------------------------------------------------------------------------------------|
| 2744 | 1,2,6,17,1 3,4,5,7,8,2<br>8,19,21,24 0,22,23 | 3 P35280,Q4G075,Q68G31                                                                        |
| 2745 | 1,2,6,17,1 3,4,5,7,8,2<br>8,19,22,23 0,21,24 | 7 D3ZUC6,P00762,P06760,P08649,P22273,P47967,Q9EQS0                                            |
| 2746 | 1,2,6,17,1 3,4,5,7,8,2<br>8,19,22,24 0,21,23 | 7 D3ZUC6,P00762,P06760,P08649,P22273,P97840,Q4G075                                            |
| 2747 | 1,2,6,17,1 3,4,5,7,8,2<br>8,19,23,24 0,21,22 | 8 D3ZUC6,P00762,P06760,P22273,P35280,P47967,P97840,Q4G075                                     |
| 2748 | 1,2,6,17,1 3,4,5,7,8,1<br>8,20,21,22 9,23,24 | 3 P01835,P20761,P63029                                                                        |
| 2749 | 1,2,6,17,1 3,4,5,7,8,1<br>8,20,21,23 9,22,24 | 4 P01835,P35280,P55091,P63029                                                                 |
| 2750 | 1,2,6,17,1 3,4,5,7,8,1<br>8,20,21,24 9,22,23 | 5 O35077,P01835,P35280,P63029,Q68G31                                                          |
| 2751 | 1,2,6,17,1 3,4,5,7,8,1<br>8,20,22,23 9,21,24 | 5 P04355,P06760,P63029,Q99MH3,Q9EQS0                                                          |
| 2752 | 1,2,6,17,1 3,4,5,7,8,1<br>8,20,22,24 9,21,23 | 4 D3ZUC6,O35077,P06760,P22006                                                                 |
| 2753 | 1,2,6,17,1 3,4,5,7,8,1<br>8,20,23,24 9,21,22 | 4 O35077,P06760,P08937,P35280                                                                 |
| 2754 | 1,2,6,17,1 3,4,5,7,8,1<br>8,21,22,23 9,20,24 | 3 Q4G075,Q5I0D1,Q9EQS0                                                                        |
| 2755 | 1,2,6,17,1 3,4,5,7,8,1<br>8,21,22,24 9,20,23 | 5 D3ZUC6,P10758,P23739,Q4G075,Q5I0D1                                                          |
| 2756 | 1,2,6,17,1 3,4,5,7,8,1<br>8,21,23,24 9,20,22 | 5 O70417,P35280,P97840,Q4G075,Q5I0D1                                                          |
| 2757 | 1,2,6,17,1 3,4,5,7,8,1<br>8,22,23,24 9,20,21 | 13 D3ZUC6,P02780,P06760,P22273,P22282,P47967,P55159,P97840,Q4G075,Q5I0D1,Q63617,Q9EQS0,Q9WTT6 |
| 2758 | 1,2,6,17,1 3,4,5,7,8,1<br>9,20,21,22 8,23,24 | 4 O89117,P49134,P63029,Q68G31                                                                 |
| 2759 | 1,2,6,17,1 3,4,5,7,8,1<br>9,20,21,23 8,22,24 | 4 P35280,P49134,P63029,Q68G31                                                                 |
| 2760 | 1,2,6,17,1 3,4,5,7,8,1<br>9,20,21,24 8,22,23 | 5 O35547,P27590,P35280,P63029,Q68G31                                                          |
| 2761 | 1,2,6,17,1 3,4,5,7,8,1<br>9,20,22,23 8,21,24 | 3 O89117,P02625,P63029                                                                        |
| 2762 | 1,2,6,17,1 3,4,5,7,8,1<br>9,20,22,24 8,21,23 | 5 D3ZUC6,O35077,O89117,P22006,Q68G31                                                          |
| 2763 | 1,2,6,17,1 3,4,5,7,8,1<br>9,20,23,24 8,21,22 | 4 O89117,P35280,P97840,Q68G31                                                                 |

|      |                                              |    |                                                                                                          |
|------|----------------------------------------------|----|----------------------------------------------------------------------------------------------------------|
| 2764 | 1,2,6,17,1 3,4,5,7,8,1<br>9,21,22,23 8,20,24 | 3  | P97840,Q4G075,Q9R168                                                                                     |
| 2765 | 1,2,6,17,1 3,4,5,7,8,1<br>9,21,22,24 8,20,23 | 5  | D3ZUC6,P97840,Q4G075,Q68G31,Q9R168                                                                       |
| 2766 | 1,2,6,17,1 3,4,5,7,8,1<br>9,21,23,24 8,20,22 | 6  | O70417,P35280,P97840,Q4G075,Q63474,Q68G31                                                                |
| 2767 | 1,2,6,17,1 3,4,5,7,8,1<br>9,22,23,24 8,20,21 | 12 | D3ZUC6,O89117,P00507,P00762,P06760,P22273,P47967,P97840,Q4G075,Q5I0D1,Q811M5,Q9EQS0                      |
| 2768 | 1,2,6,17,2 3,4,5,7,8,1<br>0,21,22,23 8,19,24 | 2  | P01835,P63029                                                                                            |
| 2769 | 1,2,6,17,2 3,4,5,7,8,1<br>0,21,22,24 8,19,23 | 3  | O35077,P01835,P63029                                                                                     |
| 2770 | 1,2,6,17,2 3,4,5,7,8,1<br>0,21,23,24 8,19,22 | 4  | P01835,P35280,P63029,P97840                                                                              |
| 2771 | 1,2,6,17,2 3,4,5,7,8,1<br>0,22,23,24 8,19,21 | 9  | D3ZUC6,O35077,O89117,P06760,P08937,P22006,P47967,P63029,P97840                                           |
| 2772 | 1,2,6,17,2 3,4,5,7,8,1<br>1,22,23,24 8,19,20 | 8  | D3ZUC6,P01835,P02780,P47967,P97840,Q4G075,Q5I0D1,Q9R168                                                  |
| 2773 | 1,2,6,18,1 3,4,5,7,8,1<br>9,20,21,22 7,23,24 | 2  | Q5PQL7,Q68G31                                                                                            |
| 2774 | 1,2,6,18,1 3,4,5,7,8,1<br>9,20,21,23 7,22,24 | 3  | O70417,P35280,Q68G31                                                                                     |
| 2775 | 1,2,6,18,1 3,4,5,7,8,1<br>9,20,21,24 7,22,23 | 3  | P01835,P35280,Q68G31                                                                                     |
| 2776 | 1,2,6,18,1 3,4,5,7,8,1<br>9,20,22,23 7,21,24 | 3  | P04355,P06760,Q9EQS0                                                                                     |
| 2777 | 1,2,6,18,1 3,4,5,7,8,1<br>9,20,22,24 7,21,23 | 4  | P06760,P22006,Q68G31,Q9QX74                                                                              |
| 2778 | 1,2,6,18,1 3,4,5,7,8,1<br>9,20,23,24 7,21,22 | 4  | P06760,P35280,Q68G31,Q9QX74                                                                              |
| 2779 | 1,2,6,18,1 3,4,5,7,8,1<br>9,21,22,23 7,20,24 | 5  | O70417,P13676,Q4G075,Q811M5,Q9EQS0                                                                       |
| 2780 | 1,2,6,18,1 3,4,5,7,8,1<br>9,21,22,24 7,20,23 | 6  | O70417,P13676,P23739,P36376,Q4G075,Q68G31                                                                |
| 2781 | 1,2,6,18,1 3,4,5,7,8,1<br>9,21,23,24 7,20,22 | 4  | O70417,P35280,Q4G075,Q68G31                                                                              |
| 2782 | 1,2,6,18,1 3,4,5,7,8,1<br>9,22,23,24 7,20,21 | 15 | D3ZUC6,D4A5U3,O70417,P00507,P00762,P06760,P13676,P22273,P26772,P47967,Q4G075,Q811M5,Q9EQS0,Q9QX74,Q9WTT6 |
| 2783 | 1,2,6,18,2 3,4,5,7,8,1<br>0,21,22,23 7,19,24 | 2  | P01835,P54921                                                                                            |

|      |                                              |                                                                                                |
|------|----------------------------------------------|------------------------------------------------------------------------------------------------|
| 2784 | 1,2,6,18,2 3,4,5,7,8,1<br>0,21,22,24 7,19,23 | 3 P01835,P22006,Q68G31                                                                         |
| 2785 | 1,2,6,18,2 3,4,5,7,8,1<br>0,21,23,24 7,19,22 | 5 O70417,P01835,P20646,P35280,Q68G31                                                           |
| 2786 | 1,2,6,18,2 3,4,5,7,8,1<br>0,22,23,24 7,19,21 | 8 P01835,P04355,P06760,P20646,P22006,Q5QE79,Q9EQS0,Q9QX74                                      |
| 2787 | 1,2,6,18,2 3,4,5,7,8,1<br>1,22,23,24 7,19,20 | 10 D4A5U3,O70417,P01835,P13676,P20646,Q4G075,Q5I0D1,Q9EQS0,Q9QX74,Q9WTT6                       |
| 2788 | 1,2,6,19,2 3,4,5,7,8,1<br>0,21,22,23 7,18,24 | 2 O70417,P01835                                                                                |
| 2789 | 1,2,6,19,2 3,4,5,7,8,1<br>0,21,22,24 7,18,23 | 3 O70594,P01835,Q68G31                                                                         |
| 2790 | 1,2,6,19,2 3,4,5,7,8,1<br>0,21,23,24 7,18,22 | 5 O70417,P01835,P14173,P35280,Q68G31                                                           |
| 2791 | 1,2,6,19,2 3,4,5,7,8,1<br>0,22,23,24 7,18,21 | 6 P06760,P22006,P26772,Q68G31,Q811M5,Q9QX74                                                    |
| 2792 | 1,2,6,19,2 3,4,5,7,8,1<br>1,22,23,24 7,18,20 | 6 O70417,P01835,P13676,P97840,Q4G075,Q811M5                                                    |
| 2793 | 1,2,6,20,2 3,4,5,7,8,1<br>1,22,23,24 7,18,19 | 4 O70417,P01835,P20646,Q9QX74                                                                  |
| 2794 | 1,2,7,8,17, 3,4,5,6,21,<br>18,19,20 22,23,24 | 9 iRT-Kit_WR_fusion,P13676,P25809,P30919,P47727,Q5GRG2,Q66H69,Q811M5,Q9WTT6                    |
| 2795 | 1,2,7,8,17, 3,4,5,6,20,<br>18,19,21 22,23,24 | 7 iRT-Kit_WR_fusion,P22006,P62804,Q00715,Q66H69,Q6P6R2,Q9QX74                                  |
| 2796 | 1,2,7,8,17, 3,4,5,6,20,<br>18,19,22 21,23,24 | 2 P09656,Q66H69                                                                                |
| 2797 | 1,2,7,8,17, 3,4,5,6,20,<br>18,19,23 21,22,24 | 2 P21674,Q66H69                                                                                |
| 2798 | 1,2,7,8,17, 3,4,5,6,20,<br>18,19,24 21,22,23 | 3 P02783,P09656,Q66H69                                                                         |
| 2799 | 1,2,7,8,17, 3,4,5,6,19,<br>18,20,21 22,23,24 | iRT-<br>11 Kit_WR_fusion,P00507,P25809,P47727,P55091,P62804,Q00715,Q5GRG2,Q811M5,Q9QX74,Q9WTT6 |
| 2800 | 1,2,7,8,17, 3,4,5,6,19,<br>18,20,22 21,23,24 | 3 P25809,P30919,Q5GRG2                                                                         |
| 2801 | 1,2,7,8,17, 3,4,5,6,19,<br>18,20,23 21,22,24 | 2 P30919,P55091                                                                                |
| 2802 | 1,2,7,8,17, 3,4,5,6,19,<br>18,20,24 21,22,23 | 4 P47727,Q5GRG2,Q811M5,Q9JHB9                                                                  |
| 2803 | 1,2,7,8,17, 3,4,5,6,19,<br>18,21,22 20,23,24 | 1 Q9Z1F2                                                                                       |

|      |                                              |                                                                                                                                              |
|------|----------------------------------------------|----------------------------------------------------------------------------------------------------------------------------------------------|
| 2804 | 1,2,7,8,17, 3,4,5,6,19,<br>18,21,23 20,22,24 | 5 iRT-Kit_WR_fusion,P21674,P22006,Q9Z0V6,Q9Z1F2                                                                                              |
| 2805 | 1,2,7,8,17, 3,4,5,6,19,<br>18,21,24 20,22,23 | 2 Q811M5,Q9Z1F2                                                                                                                              |
| 2806 | 1,2,7,8,17, 3,4,5,6,19,<br>18,22,23 20,21,24 | 0                                                                                                                                            |
| 2807 | 1,2,7,8,17, 3,4,5,6,19,<br>18,22,24 20,21,23 | 1 Q9Z1F2                                                                                                                                     |
| 2808 | 1,2,7,8,17, 3,4,5,6,19,<br>18,23,24 20,21,22 | 1 Q63598                                                                                                                                     |
| 2809 | 1,2,7,8,17, 3,4,5,6,18,<br>19,20,21 22,23,24 | D4A5U3,iRT-<br>17 Kit_WR_fusion,P09456,P13676,P24368,P25809,P30120,P47727,P62804,P97675,Q00715,Q66H69<br>,Q6P6R2,Q811M5,Q812E4,Q9QX74,Q9WTT6 |
| 2810 | 1,2,7,8,17, 3,4,5,6,18,<br>19,20,22 21,23,24 | 3 iRT-Kit_WR_fusion,O89117,Q9WTT6                                                                                                            |
| 2811 | 1,2,7,8,17, 3,4,5,6,18,<br>19,20,23 21,22,24 | 6 iRT-Kit_WR_fusion,P21674,Q66H69,Q812E4,Q8CJD3,Q9WTT6                                                                                       |
| 2812 | 1,2,7,8,17, 3,4,5,6,18,<br>19,20,24 21,22,23 | 10 iRT-Kit_WR_fusion,P08723,P09456,P30120,P47727,P54921,Q66H69,Q68G31,Q812E4,Q9WTT6                                                          |
| 2813 | 1,2,7,8,17, 3,4,5,6,18,<br>19,21,22 20,23,24 | 3 iRT-Kit_WR_fusion,Q66H69,Q9QX74                                                                                                            |
| 2814 | 1,2,7,8,17, 3,4,5,6,18,<br>19,21,23 20,22,24 | 6 iRT-Kit_WR_fusion,P21674,P22006,Q63474,Q66H69,Q9QX74                                                                                       |
| 2815 | 1,2,7,8,17, 3,4,5,6,18,<br>19,21,24 20,22,23 | 4 iRT-Kit_WR_fusion,P54921,Q63474,Q66H69                                                                                                     |
| 2816 | 1,2,7,8,17, 3,4,5,6,18,<br>19,22,23 20,21,24 | 1 iRT-Kit_WR_fusion                                                                                                                          |
| 2817 | 1,2,7,8,17, 3,4,5,6,18,<br>19,22,24 20,21,23 | 2 iRT-Kit_WR_fusion,Q66H69                                                                                                                   |
| 2818 | 1,2,7,8,17, 3,4,5,6,18,<br>19,23,24 20,21,22 | 2 iRT-Kit_WR_fusion,Q66H69                                                                                                                   |
| 2819 | 1,2,7,8,17, 3,4,5,6,18,<br>20,21,22 19,23,24 | 3 iRT-Kit_WR_fusion,P25809,Q9WTT6                                                                                                            |
| 2820 | 1,2,7,8,17, 3,4,5,6,18,<br>20,21,23 19,22,24 | 4 iRT-Kit_WR_fusion,P25809,Q812E4,Q9WTT6                                                                                                     |
| 2821 | 1,2,7,8,17, 3,4,5,6,18,<br>20,21,24 19,22,23 | 10 iRT-Kit_WR_fusion,P02782,P08723,P09456,P25809,P30120,P47727,Q811M5,Q812E4,Q9JHB9                                                          |
| 2822 | 1,2,7,8,17, 3,4,5,6,18,<br>20,22,23 19,21,24 | 2 iRT-Kit_WR_fusion,O89117                                                                                                                   |
| 2823 | 1,2,7,8,17, 3,4,5,6,18,<br>20,22,24 19,21,23 | 1 O89117                                                                                                                                     |

|      |                                              |                                                                             |
|------|----------------------------------------------|-----------------------------------------------------------------------------|
| 2824 | 1,2,7,8,17, 3,4,5,6,18,<br>20,23,24 19,21,22 | 1 Q812E4                                                                    |
| 2825 | 1,2,7,8,17, 3,4,5,6,18,<br>21,22,23 19,20,24 | 1 iRT-Kit_WR_fusion                                                         |
| 2826 | 1,2,7,8,17, 3,4,5,6,18,<br>21,22,24 19,20,23 | 2 iRT-Kit_WR_fusion,Q9Z1F2                                                  |
| 2827 | 1,2,7,8,17, 3,4,5,6,18,<br>21,23,24 19,20,22 | 2 iRT-Kit_WR_fusion,Q63474                                                  |
| 2828 | 1,2,7,8,17, 3,4,5,6,18,<br>22,23,24 19,20,21 | 2 P47967,P97840                                                             |
| 2829 | 1,2,7,8,18, 3,4,5,6,17,<br>19,20,21 22,23,24 | 9 iRT-Kit_WR_fusion,P25809,P47727,P62804,Q00715,Q66H69,Q68G31,Q812E4,Q9WTT6 |
| 2830 | 1,2,7,8,18, 3,4,5,6,17,<br>19,20,22 21,23,24 | 1 iRT-Kit_WR_fusion                                                         |
| 2831 | 1,2,7,8,18, 3,4,5,6,17,<br>19,20,23 21,22,24 | 1 iRT-Kit_WR_fusion                                                         |
| 2832 | 1,2,7,8,18, 3,4,5,6,17,<br>19,20,24 21,22,23 | 6 iRT-Kit_WR_fusion,P08723,P47727,Q66H69,Q68G31,Q812E4                      |
| 2833 | 1,2,7,8,18, 3,4,5,6,17,<br>19,21,22 20,23,24 | 3 iRT-Kit_WR_fusion,P62804,Q66H69                                           |
| 2834 | 1,2,7,8,18, 3,4,5,6,17,<br>19,21,23 20,22,24 | 2 iRT-Kit_WR_fusion,Q66H69                                                  |
| 2835 | 1,2,7,8,18, 3,4,5,6,17,<br>19,21,24 20,22,23 | 3 iRT-Kit_WR_fusion,Q66H69,Q68G31                                           |
| 2836 | 1,2,7,8,18, 3,4,5,6,17,<br>19,22,23 20,21,24 | 1 iRT-Kit_WR_fusion                                                         |
| 2837 | 1,2,7,8,18, 3,4,5,6,17,<br>19,22,24 20,21,23 | 0                                                                           |
| 2838 | 1,2,7,8,18, 3,4,5,6,17,<br>19,23,24 20,21,22 | 1 P20766                                                                    |
| 2839 | 1,2,7,8,18, 3,4,5,6,17,<br>20,21,22 19,23,24 | 3 iRT-Kit_WR_fusion,P25809,P62804                                           |
| 2840 | 1,2,7,8,18, 3,4,5,6,17,<br>20,21,23 19,22,24 | 3 iRT-Kit_WR_fusion,P25809,Q812E4                                           |
| 2841 | 1,2,7,8,18, 3,4,5,6,17,<br>20,21,24 19,22,23 | 8 iRT-Kit_WR_fusion,P25809,P30120,P47727,Q00715,Q811M5,Q812E4,Q9JHB9        |
| 2842 | 1,2,7,8,18, 3,4,5,6,17,<br>20,22,23 19,21,24 | 0                                                                           |
| 2843 | 1,2,7,8,18, 3,4,5,6,17,<br>20,22,24 19,21,23 | 0                                                                           |

|      |                                              |                                                                                                       |
|------|----------------------------------------------|-------------------------------------------------------------------------------------------------------|
| 2844 | 1,2,7,8,18, 3,4,5,6,17,<br>20,23,24 19,21,22 | 0                                                                                                     |
| 2845 | 1,2,7,8,18, 3,4,5,6,17,<br>21,22,23 19,20,24 | 1 iRT-Kit_WR_fusion                                                                                   |
| 2846 | 1,2,7,8,18, 3,4,5,6,17,<br>21,22,24 19,20,23 | 1 Q9Z1F2                                                                                              |
| 2847 | 1,2,7,8,18, 3,4,5,6,17,<br>21,23,24 19,20,22 | 1 iRT-Kit_WR_fusion                                                                                   |
| 2848 | 1,2,7,8,18, 3,4,5,6,17,<br>22,23,24 19,20,21 | 1 Q64268                                                                                              |
| 2849 | 1,2,7,8,19, 3,4,5,6,17,<br>20,21,22 18,23,24 | 5 iRT-Kit_WR_fusion,P62804,Q66H69,Q812E4,Q9WTT6                                                       |
| 2850 | 1,2,7,8,19, 3,4,5,6,17,<br>20,21,23 18,22,24 | 5 iRT-Kit_WR_fusion,P62804,Q66H69,Q812E4,Q9WTT6                                                       |
| 2851 | 1,2,7,8,19, 3,4,5,6,17,<br>20,21,24 18,22,23 | iRT-<br>12 Kit_WR_fusion,O35547,P02782,P08723,P09456,P24368,P30120,P47727,Q66H69,Q68G31,Q812E4,Q9JHB9 |
| 2852 | 1,2,7,8,19, 3,4,5,6,17,<br>20,22,23 18,21,24 | 1 iRT-Kit_WR_fusion                                                                                   |
| 2853 | 1,2,7,8,19, 3,4,5,6,17,<br>20,22,24 18,21,23 | 3 iRT-Kit_WR_fusion,P08723,Q812E4                                                                     |
| 2854 | 1,2,7,8,19, 3,4,5,6,17,<br>20,23,24 18,21,22 | 2 iRT-Kit_WR_fusion,Q812E4                                                                            |
| 2855 | 1,2,7,8,19, 3,4,5,6,17,<br>21,22,23 18,20,24 | 1 iRT-Kit_WR_fusion                                                                                   |
| 2856 | 1,2,7,8,19, 3,4,5,6,17,<br>21,22,24 18,20,23 | 2 iRT-Kit_WR_fusion,Q66H69                                                                            |
| 2857 | 1,2,7,8,19, 3,4,5,6,17,<br>21,23,24 18,20,22 | 3 iRT-Kit_WR_fusion,Q63474,Q66H69                                                                     |
| 2858 | 1,2,7,8,19, 3,4,5,6,17,<br>22,23,24 18,20,21 | 2 iRT-Kit_WR_fusion,P26772                                                                            |
| 2859 | 1,2,7,8,20, 3,4,5,6,17,<br>21,22,23 18,19,24 | 1 iRT-Kit_WR_fusion                                                                                   |
| 2860 | 1,2,7,8,20, 3,4,5,6,17,<br>21,22,24 18,19,23 | 4 iRT-Kit_WR_fusion,P01835,Q812E4,Q9JHB9                                                              |
| 2861 | 1,2,7,8,20, 3,4,5,6,17,<br>21,23,24 18,19,22 | 3 iRT-Kit_WR_fusion,P01835,Q812E4                                                                     |
| 2862 | 1,2,7,8,20, 3,4,5,6,17,<br>22,23,24 18,19,21 | 1 iRT-Kit_WR_fusion                                                                                   |
| 2863 | 1,2,7,8,21, 3,4,5,6,17,<br>22,23,24 18,19,20 | 1 iRT-Kit_WR_fusion                                                                                   |

|      |                                              |                                                    |
|------|----------------------------------------------|----------------------------------------------------|
| 2864 | 1,2,7,17,1 3,4,5,6,8,2<br>8,19,20,21 2,23,24 | 7 P00507,P20760,P25809,P30919,P62804,Q6P6R2,Q811M5 |
| 2865 | 1,2,7,17,1 3,4,5,6,8,2<br>8,19,20,22 1,23,24 | 1 P30919                                           |
| 2866 | 1,2,7,17,1 3,4,5,6,8,2<br>8,19,20,23 1,22,24 | 2 P30919,Q10743                                    |
| 2867 | 1,2,7,17,1 3,4,5,6,8,2<br>8,19,20,24 1,22,23 | 3 P02783,P30919,P54921                             |
| 2868 | 1,2,7,17,1 3,4,5,6,8,2<br>8,19,21,22 0,23,24 | 1 P23739                                           |
| 2869 | 1,2,7,17,1 3,4,5,6,8,2<br>8,19,21,23 0,22,24 | 3 P21674,P22006,Q10743                             |
| 2870 | 1,2,7,17,1 3,4,5,6,8,2<br>8,19,21,24 0,22,23 | 1 P02783                                           |
| 2871 | 1,2,7,17,1 3,4,5,6,8,2<br>8,19,22,23 0,21,24 | 4 P00762,P22273,Q10743,Q9EQS0                      |
| 2872 | 1,2,7,17,1 3,4,5,6,8,2<br>8,19,22,24 0,21,23 | 3 D3ZUC6,P00762,P09656                             |
| 2873 | 1,2,7,17,1 3,4,5,6,8,2<br>8,19,23,24 0,21,22 | 2 P00762,Q10743                                    |
| 2874 | 1,2,7,17,1 3,4,5,6,8,1<br>8,20,21,22 9,23,24 | 3 P01835,P25809,P30919                             |
| 2875 | 1,2,7,17,1 3,4,5,6,8,1<br>8,20,21,23 9,22,24 | 2 P01835,P30919                                    |
| 2876 | 1,2,7,17,1 3,4,5,6,8,1<br>8,20,21,24 9,22,23 | 3 P00507,P01835,Q811M5                             |
| 2877 | 1,2,7,17,1 3,4,5,6,8,1<br>8,20,22,23 9,21,24 | 2 P30919,Q10743                                    |
| 2878 | 1,2,7,17,1 3,4,5,6,8,1<br>8,20,22,24 9,21,23 | 0                                                  |
| 2879 | 1,2,7,17,1 3,4,5,6,8,1<br>8,20,23,24 9,21,22 | 2 P08937,P30919                                    |
| 2880 | 1,2,7,17,1 3,4,5,6,8,1<br>8,21,22,23 9,20,24 | 0                                                  |
| 2881 | 1,2,7,17,1 3,4,5,6,8,1<br>8,21,22,24 9,20,23 | 1 P42854                                           |
| 2882 | 1,2,7,17,1 3,4,5,6,8,1<br>8,21,23,24 9,20,22 | 1 P19218                                           |
| 2883 | 1,2,7,17,1 3,4,5,6,8,1<br>8,22,23,24 9,20,21 | 7 D3ZUC6,P08937,P22273,P22282,Q10743,Q5I0D1,Q64268 |



|      |                                              |                        |
|------|----------------------------------------------|------------------------|
| 2884 | 1,2,7,17,1 3,4,5,6,8,1<br>9,20,21,22 8,23,24 | 0                      |
| 2885 | 1,2,7,17,1 3,4,5,6,8,1<br>9,20,21,23 8,22,24 | 1 P23593               |
| 2886 | 1,2,7,17,1 3,4,5,6,8,1<br>9,20,21,24 8,22,23 | 2 P54921,Q6AY61        |
| 2887 | 1,2,7,17,1 3,4,5,6,8,1<br>9,20,22,23 8,21,24 | 3 O89117,P02625,Q10743 |
| 2888 | 1,2,7,17,1 3,4,5,6,8,1<br>9,20,22,24 8,21,23 | 2 O89117,P54921        |
| 2889 | 1,2,7,17,1 3,4,5,6,8,1<br>9,20,23,24 8,21,22 | 2 P02625,P54921        |
| 2890 | 1,2,7,17,1 3,4,5,6,8,1<br>9,21,22,23 8,20,24 | 1 Q9R168               |
| 2891 | 1,2,7,17,1 3,4,5,6,8,1<br>9,21,22,24 8,20,23 | 2 P54921,Q9R168        |
| 2892 | 1,2,7,17,1 3,4,5,6,8,1<br>9,21,23,24 8,20,22 | 3 P14173,Q63474,Q9R168 |
| 2893 | 1,2,7,17,1 3,4,5,6,8,1<br>9,22,23,24 8,20,21 | 3 D3ZUC6,P22273,Q9R168 |
| 2894 | 1,2,7,17,2 3,4,5,6,8,1<br>0,21,22,23 8,19,24 | 1 P01835               |
| 2895 | 1,2,7,17,2 3,4,5,6,8,1<br>0,21,22,24 8,19,23 | 2 P01835,Q9R168        |
| 2896 | 1,2,7,17,2 3,4,5,6,8,1<br>0,21,23,24 8,19,22 | 1 P01835               |
| 2897 | 1,2,7,17,2 3,4,5,6,8,1<br>0,22,23,24 8,19,21 | 1 P08937               |
| 2898 | 1,2,7,17,2 3,4,5,6,8,1<br>1,22,23,24 8,19,20 | 2 P01835,Q9R168        |
| 2899 | 1,2,7,18,1 3,4,5,6,8,1<br>9,20,21,22 7,23,24 | 0                      |
| 2900 | 1,2,7,18,1 3,4,5,6,8,1<br>9,20,21,23 7,22,24 | 1 P23593               |
| 2901 | 1,2,7,18,1 3,4,5,6,8,1<br>9,20,21,24 7,22,23 | 2 P01835,Q68G31        |
| 2902 | 1,2,7,18,1 3,4,5,6,8,1<br>9,20,22,23 7,21,24 | 0                      |
| 2903 | 1,2,7,18,1 3,4,5,6,8,1<br>9,20,22,24 7,21,23 | 0                      |

|      |                                              |                                                           |
|------|----------------------------------------------|-----------------------------------------------------------|
| 2904 | 1,2,7,18,1 3,4,5,6,8,1<br>9,20,23,24 7,21,22 | 0                                                         |
| 2905 | 1,2,7,18,1 3,4,5,6,8,1<br>9,21,22,23 7,20,24 | 1 O70417                                                  |
| 2906 | 1,2,7,18,1 3,4,5,6,8,1<br>9,21,22,24 7,20,23 | 1 P36376                                                  |
| 2907 | 1,2,7,18,1 3,4,5,6,8,1<br>9,21,23,24 7,20,22 | 1 O70417                                                  |
| 2908 | 1,2,7,18,1 3,4,5,6,8,1<br>9,22,23,24 7,20,21 | 3 P22273,P26772,Q9EQS0                                    |
| 2909 | 1,2,7,18,2 3,4,5,6,8,1<br>0,21,22,23 7,19,24 | 1 P01835                                                  |
| 2910 | 1,2,7,18,2 3,4,5,6,8,1<br>0,21,22,24 7,19,23 | 1 P01835                                                  |
| 2911 | 1,2,7,18,2 3,4,5,6,8,1<br>0,21,23,24 7,19,22 | 1 P01835                                                  |
| 2912 | 1,2,7,18,2 3,4,5,6,8,1<br>0,22,23,24 7,19,21 | 2 P01835,P08937                                           |
| 2913 | 1,2,7,18,2 3,4,5,6,8,1<br>1,22,23,24 7,19,20 | 3 O70417,P01835,P13676                                    |
| 2914 | 1,2,7,19,2 3,4,5,6,8,1<br>0,21,22,23 7,18,24 | 1 P01835                                                  |
| 2915 | 1,2,7,19,2 3,4,5,6,8,1<br>0,21,22,24 7,18,23 | 2 O70594,P01835                                           |
| 2916 | 1,2,7,19,2 3,4,5,6,8,1<br>0,21,23,24 7,18,22 | 4 O70417,P01835,P14173,P23593                             |
| 2917 | 1,2,7,19,2 3,4,5,6,8,1<br>0,22,23,24 7,18,21 | 1 P26772                                                  |
| 2918 | 1,2,7,19,2 3,4,5,6,8,1<br>1,22,23,24 7,18,20 | 3 O70417,P01835,Q9R168                                    |
| 2919 | 1,2,7,20,2 3,4,5,6,8,1<br>1,22,23,24 7,18,19 | 1 P01835                                                  |
| 2920 | 1,2,8,17,1 3,4,5,6,7,2<br>8,19,20,21 2,23,24 | 8 B0LT89,P25809,P47727,P97675,Q66H69,Q68G31,Q6P6R2,Q811M5 |
| 2921 | 1,2,8,17,1 3,4,5,6,7,2<br>8,19,20,22 1,23,24 | 4 O89117,P25809,P36860,P47727                             |
| 2922 | 1,2,8,17,1 3,4,5,6,7,2<br>8,19,20,23 1,22,24 | 1 P30919                                                  |
| 2923 | 1,2,8,17,1 3,4,5,6,7,2<br>8,19,20,24 1,22,23 | 3 P02783,P47727,Q68G31                                    |

|      |                                              |                                                           |
|------|----------------------------------------------|-----------------------------------------------------------|
| 2924 | 1,2,8,17,1 3,4,5,6,7,2<br>8,19,21,22 0,23,24 | 0                                                         |
| 2925 | 1,2,8,17,1 3,4,5,6,7,2<br>8,19,21,23 0,22,24 | 3 P21674,P22006,Q66H69                                    |
| 2926 | 1,2,8,17,1 3,4,5,6,7,2<br>8,19,21,24 0,22,23 | 3 P02783,Q66H69,Q68G31                                    |
| 2927 | 1,2,8,17,1 3,4,5,6,7,2<br>8,19,22,23 0,21,24 | 1 P00714                                                  |
| 2928 | 1,2,8,17,1 3,4,5,6,7,2<br>8,19,22,24 0,21,23 | 1 D3ZUC6                                                  |
| 2929 | 1,2,8,17,1 3,4,5,6,7,2<br>8,19,23,24 0,21,22 | 2 P47967,P97840                                           |
| 2930 | 1,2,8,17,1 3,4,5,6,7,1<br>8,20,21,22 9,23,24 | 2 P25809,P47727                                           |
| 2931 | 1,2,8,17,1 3,4,5,6,7,1<br>8,20,21,23 9,22,24 | 1 P25809                                                  |
| 2932 | 1,2,8,17,1 3,4,5,6,7,1<br>8,20,21,24 9,22,23 | 5 P25809,P30120,P47727,Q68G31,Q811M5                      |
| 2933 | 1,2,8,17,1 3,4,5,6,7,1<br>8,20,22,23 9,21,24 | 1 P00714                                                  |
| 2934 | 1,2,8,17,1 3,4,5,6,7,1<br>8,20,22,24 9,21,23 | 0                                                         |
| 2935 | 1,2,8,17,1 3,4,5,6,7,1<br>8,20,23,24 9,21,22 | 1 Q99041                                                  |
| 2936 | 1,2,8,17,1 3,4,5,6,7,1<br>8,21,22,23 9,20,24 | 2 P00714,P68511                                           |
| 2937 | 1,2,8,17,1 3,4,5,6,7,1<br>8,21,22,24 9,20,23 | 2 P10758,P42854                                           |
| 2938 | 1,2,8,17,1 3,4,5,6,7,1<br>8,21,23,24 9,20,22 | 2 P97840,Q99041                                           |
| 2939 | 1,2,8,17,1 3,4,5,6,7,1<br>8,22,23,24 9,20,21 | 8 D3ZUC6,P00714,P11598,P47967,P97840,Q5I0D1,Q63617,Q9R0T3 |
| 2940 | 1,2,8,17,1 3,4,5,6,7,1<br>9,20,21,22 8,23,24 | 5 B0LT89,O89117,P25809,P97675,Q6P6R2                      |
| 2941 | 1,2,8,17,1 3,4,5,6,7,1<br>9,20,21,23 8,22,24 | 4 P25809,P63029,Q68G31,Q6P6R2                             |
| 2942 | 1,2,8,17,1 3,4,5,6,7,1<br>9,20,21,24 8,22,23 | 7 B0LT89,P25809,P30120,P47727,P60905,P97675,Q68G31        |
| 2943 | 1,2,8,17,1 3,4,5,6,7,1<br>9,20,22,23 8,21,24 | 1 O89117                                                  |

|      |                                              |                                                    |
|------|----------------------------------------------|----------------------------------------------------|
| 2944 | 1,2,8,17,1 3,4,5,6,7,1<br>9,20,22,24 8,21,23 | 2 O89117,Q68G31                                    |
| 2945 | 1,2,8,17,1 3,4,5,6,7,1<br>9,20,23,24 8,21,22 | 3 O89117,P97840,Q68G31                             |
| 2946 | 1,2,8,17,1 3,4,5,6,7,1<br>9,21,22,23 8,20,24 | 0                                                  |
| 2947 | 1,2,8,17,1 3,4,5,6,7,1<br>9,21,22,24 8,20,23 | 1 P97840                                           |
| 2948 | 1,2,8,17,1 3,4,5,6,7,1<br>9,21,23,24 8,20,22 | 3 P97840,Q63474,Q68G31                             |
| 2949 | 1,2,8,17,1 3,4,5,6,7,1<br>9,22,23,24 8,20,21 | 7 D3ZUC6,O89117,P00507,P11598,P47967,P97840,Q5I0D1 |
| 2950 | 1,2,8,17,2 3,4,5,6,7,1<br>0,21,22,23 8,19,24 | 1 P63029                                           |
| 2951 | 1,2,8,17,2 3,4,5,6,7,1<br>0,21,22,24 8,19,23 | 0                                                  |
| 2952 | 1,2,8,17,2 3,4,5,6,7,1<br>0,21,23,24 8,19,22 | 1 P63029                                           |
| 2953 | 1,2,8,17,2 3,4,5,6,7,1<br>0,22,23,24 8,19,21 | 3 O89117,P47967,P97840                             |
| 2954 | 1,2,8,17,2 3,4,5,6,7,1<br>1,22,23,24 8,19,20 | 3 P47967,P97840,Q5I0D1                             |
| 2955 | 1,2,8,18,1 3,4,5,6,7,1<br>9,20,21,22 7,23,24 | 2 P25809,Q68G31                                    |
| 2956 | 1,2,8,18,1 3,4,5,6,7,1<br>9,20,21,23 7,22,24 | 2 P25809,Q68G31                                    |
| 2957 | 1,2,8,18,1 3,4,5,6,7,1<br>9,20,21,24 7,22,23 | 4 P25809,P30120,P47727,Q68G31                      |
| 2958 | 1,2,8,18,1 3,4,5,6,7,1<br>9,20,22,23 7,21,24 | 3 P04762,P36860,Q6AY61                             |
| 2959 | 1,2,8,18,1 3,4,5,6,7,1<br>9,20,22,24 7,21,23 | 1 Q68G31                                           |
| 2960 | 1,2,8,18,1 3,4,5,6,7,1<br>9,20,23,24 7,21,22 | 1 Q68G31                                           |
| 2961 | 1,2,8,18,1 3,4,5,6,7,1<br>9,21,22,23 7,20,24 | 0                                                  |
| 2962 | 1,2,8,18,1 3,4,5,6,7,1<br>9,21,22,24 7,20,23 | 1 Q68G31                                           |
| 2963 | 1,2,8,18,1 3,4,5,6,7,1<br>9,21,23,24 7,20,22 | 1 Q68G31                                           |

|      |                               |                        |   |                                                                |
|------|-------------------------------|------------------------|---|----------------------------------------------------------------|
| 2964 | 1,2,8,18,1<br>9,22,23,24      | 3,4,5,6,7,1<br>7,20,21 | 1 | P00507                                                         |
| 2965 | 1,2,8,18,2<br>0,21,22,23      | 3,4,5,6,7,1<br>7,19,24 | 2 | P25809,P54921                                                  |
| 2966 | 1,2,8,18,2<br>0,21,22,24      | 3,4,5,6,7,1<br>7,19,23 | 0 |                                                                |
| 2967 | 1,2,8,18,2<br>0,21,23,24      | 3,4,5,6,7,1<br>7,19,22 | 0 |                                                                |
| 2968 | 1,2,8,18,2<br>0,22,23,24      | 3,4,5,6,7,1<br>7,19,21 | 1 | Q5QE79                                                         |
| 2969 | 1,2,8,18,2<br>1,22,23,24      | 3,4,5,6,7,1<br>7,19,20 | 0 |                                                                |
| 2970 | 1,2,8,19,2<br>0,21,22,23      | 3,4,5,6,7,1<br>7,18,24 | 0 |                                                                |
| 2971 | 1,2,8,19,2<br>0,21,22,24      | 3,4,5,6,7,1<br>7,18,23 | 3 | O70594,P30120,Q68G31                                           |
| 2972 | 1,2,8,19,2<br>0,21,23,24      | 3,4,5,6,7,1<br>7,18,22 | 2 | Q68G31,Q812E4                                                  |
| 2973 | 1,2,8,19,2<br>0,22,23,24      | 3,4,5,6,7,1<br>7,18,21 | 1 | P26772                                                         |
| 2974 | 1,2,8,19,2<br>1,22,23,24      | 3,4,5,6,7,1<br>7,18,20 | 0 |                                                                |
| 2975 | 1,2,8,20,2<br>1,22,23,24      | 3,4,5,6,7,1<br>7,18,19 | 1 | Q80WY6                                                         |
| 2976 | 1,2,17,18,<br>19,20,21,2<br>2 | 3,4,5,6,7,8<br>,23,24  | 6 | B0LT89,P20760,P20761,P25809,P50115,Q05702                      |
| 2977 | 1,2,17,18,<br>19,20,21,2<br>3 | 3,4,5,6,7,8<br>,22,24  | 6 | O70417,P23593,P30919,P35280,P49134,Q99041                      |
| 2978 | 1,2,17,18,<br>19,20,21,2<br>4 | 3,4,5,6,7,8<br>,22,23  | 9 | B0LT89,P02783,P20760,P20761,P23593,P35280,P50115,Q68G31,Q99041 |
| 2979 | 1,2,17,18,<br>19,20,22,2<br>3 | 3,4,5,6,7,8<br>,21,24  | 9 | P00714,P02625,P04762,P22273,P30919,P36860,P50115,Q10743,Q99041 |
| 2980 | 1,2,17,18,<br>19,20,22,2<br>4 | 3,4,5,6,7,8<br>,21,23  | 6 | D3ZUC6,O70594,P20761,P50115,Q05702,Q99041                      |

|      |                               |                       |    |                                                                                                                                                    |
|------|-------------------------------|-----------------------|----|----------------------------------------------------------------------------------------------------------------------------------------------------|
| 2981 | 1,2,17,18,<br>19,20,23,2<br>4 | 3,4,5,6,7,8<br>,21,22 | 5  | P08937,P30919,P35280,P50115,Q99041                                                                                                                 |
| 2982 | 1,2,17,18,<br>19,21,22,2<br>3 | 3,4,5,6,7,8<br>,20,24 | 8  | O70417,P00714,P02780,P22273,P22282,Q05702,Q4G075,Q99041                                                                                            |
| 2983 | 1,2,17,18,<br>19,21,22,2<br>4 | 3,4,5,6,7,8<br>,20,23 | 11 | D3ZUC6,O70417,P02780,P20761,P22273,P25031,P42854,P50115,Q05702,Q4G075,Q99041                                                                       |
| 2984 | 1,2,17,18,<br>19,21,23,2<br>4 | 3,4,5,6,7,8<br>,20,22 | 7  | O70417,P02780,P22273,P23593,P35280,Q4G075,Q99041                                                                                                   |
| 2985 | 1,2,17,18,<br>19,22,23,2<br>4 | 3,4,5,6,7,8<br>,20,21 | 21 | D3ZUC6,D4A5U3,O70417,P00714,P02780,P06760,P06761,P08937,P11598,P22273,P22282,P47967,P50115,P50116,Q05702,Q4G075,Q5I0D1,Q5M8C6,Q63617,Q99041,Q9R0T3 |
| 2986 | 1,2,17,18,<br>20,21,22,2<br>3 | 3,4,5,6,7,8<br>,19,24 | 4  | P00714,P22282,P50115,Q99041                                                                                                                        |
| 2987 | 1,2,17,18,<br>20,21,22,2<br>4 | 3,4,5,6,7,8<br>,19,23 | 4  | P20761,P42854,P50115,Q99041                                                                                                                        |
| 2988 | 1,2,17,18,<br>20,21,23,2<br>4 | 3,4,5,6,7,8<br>,19,22 | 5  | O70417,P19218,P35280,P50115,Q99041                                                                                                                 |
| 2989 | 1,2,17,18,<br>20,22,23,2<br>4 | 3,4,5,6,7,8<br>,19,21 | 10 | D3ZUC6,P00714,P06760,P06761,P08937,P22273,P22282,P47967,P50115,Q99041                                                                              |
| 2990 | 1,2,17,18,<br>21,22,23,2<br>4 | 3,4,5,6,7,8<br>,19,20 | 16 | D3ZUC6,O70417,P00714,P02780,P06761,P11598,P22273,P22282,P42854,P47967,P50115,Q4G075,Q5I0D1,Q63617,Q99041,Q9R0T3                                    |
| 2991 | 1,2,17,19,<br>20,21,22,2<br>3 | 3,4,5,6,7,8<br>,18,24 | 3  | O70417,O89117,P49134                                                                                                                               |
| 2992 | 1,2,17,19,<br>20,21,22,2<br>4 | 3,4,5,6,7,8<br>,18,23 | 6  | O70594,O89117,P20761,P49134,P50115,Q05702                                                                                                          |
| 2993 | 1,2,17,19,<br>20,21,23,2<br>4 | 3,4,5,6,7,8<br>,18,22 | 5  | O70417,P23593,P35280,P49134,Q99041                                                                                                                 |

|      |                               |                                |    |                                                                                                                                      |
|------|-------------------------------|--------------------------------|----|--------------------------------------------------------------------------------------------------------------------------------------|
| 2994 | 1,2,17,19,<br>20,22,23,2<br>4 | 3,4,5,6,7,8<br>,18,21          | 8  | D3ZUC6,O89117,P02625,P08937,P22273,P50115,Q05702,Q99041                                                                              |
| 2995 | 1,2,17,19,<br>21,22,23,2<br>4 | 3,4,5,6,7,8<br>,18,20          | 13 | D3ZUC6,O70417,P02780,P06761,P11598,P22273,P22282,P47967,Q05702,Q4G075,Q5I0D1,Q99041,Q9R168                                           |
| 2996 | 1,2,17,20,<br>21,22,23,2<br>4 | 3,4,5,6,7,8<br>,18,19          | 5  | O70417,P08937,P22282,P50115,Q99041                                                                                                   |
| 2997 | 1,2,18,19,<br>20,21,22,2<br>3 | 3,4,5,6,7,8<br>,17,24          | 4  | O70417,O70594,P23593,P50115                                                                                                          |
| 2998 | 1,2,18,19,<br>20,21,22,2<br>4 | 3,4,5,6,7,8<br>,17,23          | 6  | O70417,O70594,P20761,P50115,Q05702,Q68G31                                                                                            |
| 2999 | 1,2,18,19,<br>20,21,23,2<br>4 | 3,4,5,6,7,8<br>,17,22          | 6  | O70417,P23593,P35280,P50115,Q68G31,Q99041                                                                                            |
| 3000 | 1,2,18,19,<br>20,22,23,2<br>4 | 3,4,5,6,7,8<br>,17,21          | 11 | O70417,O70594,P06760,P22273,P26772,P50115,P50116,Q05702,Q5QE79,Q99041,Q9QX74                                                         |
| 3001 | 1,2,18,19,<br>21,22,23,2<br>4 | 3,4,5,6,7,8<br>,17,20          | 13 | D4A5U3,O70417,P02780,P06911,P13676,P22273,P22282,P50115,P50116,Q05702,Q4G075,Q62946,Q99041                                           |
| 3002 | 1,2,18,20,<br>21,22,23,2<br>4 | 3,4,5,6,7,8<br>,17,19          | 9  | O70417,O70594,P01835,P22282,P50115,P50116,Q5QE79,Q99041,Q9QX74                                                                       |
| 3003 | 1,2,19,20,<br>21,22,23,2<br>4 | 3,4,5,6,7,8<br>,17,18          | 4  | O70417,O70594,P50115,Q99PP0                                                                                                          |
| 3004 | 1,3,4,5,6,7<br>,8,17          | 2,18,19,20<br>,21,22,23,<br>24 | 19 | O70417,O70594,P01681,P13432,P18418,P23593,P49134,P50115,P50116,Q05702,Q09030,Q4FZU2,Q62946,Q6IFU7,Q6IFW6,Q6IG02,Q6IMF3,Q6P6Q2,Q99041 |
| 3005 | 1,3,4,5,6,7<br>,8,18          | 2,17,19,20<br>,21,22,23,<br>24 | 15 | O70417,O70594,P01681,P18418,P23593,P46844,P49134,Q05702,Q09030,Q4FZU2,Q6IFW6,Q6IG02,Q6IMF3,Q6P6Q2,Q99041                             |
| 3006 | 1,3,4,5,6,7<br>,8,19          | 2,17,18,20<br>,21,22,23,<br>24 | 17 | O70417,O70594,P01681,P18418,P19218,P22282,P42854,P50115,P52590,Q05702,Q09030,Q4FZU2,Q6IFW6,Q6IG02,Q6IMF3,Q6P6Q2,Q99041               |

|      |                       |                                |                                                                                                                                               |
|------|-----------------------|--------------------------------|-----------------------------------------------------------------------------------------------------------------------------------------------|
| 3007 | 1,3,4,5,6,7<br>,8,20  | 2,17,18,19<br>,21,22,23,<br>24 | O70417,P01681,P02780,P06761,P06911,P11598,P12020,P18418,P19629,P22273,P22282,P235931                                                          |
| 3008 | 1,3,4,5,6,7<br>,8,21  | 2,17,18,19<br>,20,22,23,<br>24 | 3,P25031,P42854,P47967,Q05702,Q09030,Q4FZU2,Q4G075,Q5GRG2,Q5I0D1,Q62946,Q6IFU7,<br>Q6IFW6,Q6IG02,Q6IMF3,Q6P6Q2,Q99041,Q9JHB9,Q9QW07,Q9R0T3    |
| 3009 | 1,3,4,5,6,7<br>,8,22  | 2,17,18,19<br>,20,21,23,<br>24 | O70594,P01681,P04762,P08937,P11598,P18418,P18757,P19629,P22282,P23593,P30919,P368625                                                          |
| 3010 | 1,3,4,5,6,7<br>,8,23  | 2,17,18,19<br>,20,21,22,<br>24 | 0,P46844,P47967,P49134,P50115,Q05702,Q09030,Q4FZU2,Q63493,Q6IFW6,Q6IG02,Q6IMF3,Q6P6Q2,Q99041                                                  |
| 3011 | 1,3,4,5,6,7<br>,8,24  | 2,17,18,19<br>,20,21,22,<br>23 | O70417,P01681,P19218,P23593,P27590,P30919,P35280,P42854,P49134,P50115,P97580,Q05702,Q09030,Q4FZU2,Q6IFW6,Q6IG02,Q6IMF3,Q6P6Q2,Q9904119        |
| 3012 | 1,3,4,5,6,7<br>,17,18 | 2,8,19,20,<br>21,22,23,2<br>4  | O70594,P01681,P02783,P18418,P20760,P20761,P23593,P25809,P42854,P46844,P49134,P50115,Q05702,Q09030,Q4FZU2,Q6IFW6,Q6IG02,Q6IMF3,Q6P6Q2,Q9904120 |
| 3013 | 1,3,4,5,6,7<br>,17,19 | 2,8,18,20,<br>21,22,23,2<br>4  | O70417,O70594,P01681,P18418,P23593,P25809,P30919,P36860,P46844,P49134,Q05702,Q09030,Q4FZU2,Q6IFW6,Q6IG02,Q6IMF3,Q6P6Q2,Q9904118               |
| 3014 | 1,3,4,5,6,7<br>,17,20 | 2,8,18,19,<br>21,22,23,2<br>4  | 1 O70594                                                                                                                                      |
| 3015 | 1,3,4,5,6,7<br>,17,21 | 2,8,18,19,<br>20,22,23,2<br>4  | 1 P52590                                                                                                                                      |
| 3016 | 1,3,4,5,6,7<br>,17,22 | 2,8,18,19,<br>20,21,23,2<br>4  | 1 Q6IG02                                                                                                                                      |
| 3017 | 1,3,4,5,6,7<br>,17,23 | 2,8,18,19,<br>20,21,22,2<br>4  | 6 O70594,P04762,P05539,P36860,Q4FZU2,Q6IG02                                                                                                   |
| 3018 | 1,3,4,5,6,7<br>,17,24 | 2,8,18,19,<br>20,21,22,2<br>3  | 5 P01946,P02091,P23593,P25809,Q68G31                                                                                                          |
| 3019 | 1,3,4,5,6,7<br>,18,19 | 2,8,17,20,<br>21,22,23,2<br>4  | 3 O70594,P25809,Q09030                                                                                                                        |
|      |                       |                                | 4 P25809,P36860,Q4FZU2,Q6AY61                                                                                                                 |
|      |                       |                                | 3 P47967,P52590,P97840                                                                                                                        |



|      |                       |                               |                                                                          |
|------|-----------------------|-------------------------------|--------------------------------------------------------------------------|
| 3020 | 1,3,4,5,6,7<br>,18,20 | 2,8,17,19,<br>21,22,23,2<br>4 | 4 P11598,P47967,P97840,Q5I0D1                                            |
| 3021 | 1,3,4,5,6,7<br>,18,21 | 2,8,17,19,<br>20,22,23,2<br>4 | 5 B1H234,O89117,P36860,P47967,P97840                                     |
| 3022 | 1,3,4,5,6,7<br>,18,22 | 2,8,17,19,<br>20,21,23,2<br>4 | 3 P23593,P97840,Q6P6R2                                                   |
| 3023 | 1,3,4,5,6,7<br>,18,23 | 2,8,17,19,<br>20,21,22,2<br>4 | 6 O70594,O89117,P25809,P30120,Q09030,Q9QX79                              |
| 3024 | 1,3,4,5,6,7<br>,18,24 | 2,8,17,19,<br>20,21,22,2<br>3 | 4 O89117,P25809,Q4KLZ6,Q6P6R2                                            |
| 3025 | 1,3,4,5,6,7<br>,19,20 | 2,8,17,18,<br>21,22,23,2<br>4 | 10 P02780,P10758,P11598,P42854,P47967,P52590,P97840,Q5I0D1,Q63617,Q9R0T3 |
| 3026 | 1,3,4,5,6,7<br>,19,21 | 2,8,17,18,<br>20,22,23,2<br>4 | 4 B1H234,P47967,P52590,P97840                                            |
| 3027 | 1,3,4,5,6,7<br>,19,22 | 2,8,17,18,<br>20,21,23,2<br>4 | 5 P01946,P19218,P25809,P52590,Q99041                                     |
| 3028 | 1,3,4,5,6,7<br>,19,23 | 2,8,17,18,<br>20,21,22,2<br>4 | 4 P02783,P25809,P42854,P52590                                            |
| 3029 | 1,3,4,5,6,7<br>,19,24 | 2,8,17,18,<br>20,21,22,2<br>3 | 2 P25809,P52590                                                          |
| 3030 | 1,3,4,5,6,7<br>,20,21 | 2,8,17,18,<br>19,22,23,2<br>4 | 9 P02780,P11598,P22283,P47967,P97840,Q5I0D1,Q63617,Q6IG02,Q9R0T3         |
| 3031 | 1,3,4,5,6,7<br>,20,22 | 2,8,17,18,<br>19,21,23,2<br>4 | 5 P19218,P23593,P47967,P97840,Q99041                                     |
| 3032 | 1,3,4,5,6,7<br>,20,23 | 2,8,17,18,<br>19,21,22,2<br>4 | 7 P02783,P09656,P10758,P23739,P42854,P97840,Q6IG02                       |

|      |                       |                               |                                                                                                      |
|------|-----------------------|-------------------------------|------------------------------------------------------------------------------------------------------|
| 3033 | 1,3,4,5,6,7<br>,20,24 | 2,8,17,18,<br>19,21,22,2<br>3 | 2 P11598,Q6IG02                                                                                      |
| 3034 | 1,3,4,5,6,7<br>,21,22 | 2,8,17,18,<br>19,20,23,2<br>4 | 5 P01946,P30919,P36860,P97840,Q99041                                                                 |
| 3035 | 1,3,4,5,6,7<br>,21,23 | 2,8,17,18,<br>19,20,22,2<br>4 | 5 P02783,P09656,P25809,P36860,Q09030                                                                 |
| 3036 | 1,3,4,5,6,7<br>,21,24 | 2,8,17,18,<br>19,20,22,2<br>3 | 9 B1H234,O89117,P04762,P25809,P30919,P36860,Q4FZU2,Q6IFW6,Q6IG02                                     |
| 3037 | 1,3,4,5,6,7<br>,22,23 | 2,8,17,18,<br>19,20,21,2<br>4 | 9 P02783,P09656,P23593,P25809,P30120,P47727,Q09030,Q68G31,Q6P6R2                                     |
| 3038 | 1,3,4,5,6,7<br>,22,24 | 2,8,17,18,<br>19,20,21,2<br>3 | 4 P23593,P25809,P30919,Q6P6R2                                                                        |
| 3039 | 1,3,4,5,6,7<br>,23,24 | 2,8,17,18,<br>19,20,21,2<br>2 | 6 P25809,P36860,P47727,P62804,Q09030,Q6P6R2                                                          |
| 3040 | 1,3,4,5,6,8<br>,17,18 | 2,7,19,20,<br>21,22,23,2<br>4 | 11 O70594,P01681,P13432,P18418,P23593,Q05702,Q4FZU2,Q6IFU7,Q6IG02,Q6IMF3,Q6P6Q2                      |
| 3041 | 1,3,4,5,6,8<br>,17,19 | 2,7,18,20,<br>21,22,23,2<br>4 | 9 P01681,P01835,P52590,Q05702,Q4FZU2,Q6IFW6,Q6IG02,Q6IMF3,Q6P6Q2                                     |
| 3042 | 1,3,4,5,6,8<br>,17,20 | 2,7,18,19,<br>21,22,23,2<br>4 | 13 O70417,P01681,P06911,P13432,P25031,Q05702,Q4FZU2,Q5GRG2,Q6IFU7,Q6IFW6,Q6IG02,Q6IMF3,Q6P6Q2        |
| 3043 | 1,3,4,5,6,8<br>,17,21 | 2,7,18,19,<br>20,22,23,2<br>4 | 11 O70594,P01681,P36860,Q05702,Q09030,Q4FZU2,Q6IFU7,Q6IFW6,Q6IG02,Q6IMF3,Q6P6Q2                      |
| 3044 | 1,3,4,5,6,8<br>,17,22 | 2,7,18,19,<br>20,21,23,2<br>4 | 14 O70417,P01681,P01946,P02091,P23593,P97580,Q05702,Q09030,Q4FZU2,Q6IFU7,Q6IFW6,Q6IG02,Q6IMF3,Q6P6Q2 |
| 3045 | 1,3,4,5,6,8<br>,17,23 | 2,7,18,19,<br>20,21,22,2<br>4 | 12 O70594,P01681,P02783,P23593,Q05702,Q09030,Q4FZU2,Q6IFU7,Q6IFW6,Q6IG02,Q6IMF3,Q6P6Q2               |

|      |                       |                               |    |                                                                                                                        |
|------|-----------------------|-------------------------------|----|------------------------------------------------------------------------------------------------------------------------|
| 3046 | 1,3,4,5,6,8<br>,17,24 | 2,7,18,19,<br>20,21,22,2<br>3 | 10 | P01681,P23593,Q05702,Q09030,Q4FZU2,Q6IFU7,Q6IFW6,Q6IG02,Q6IMF3,Q6P6Q2                                                  |
| 3047 | 1,3,4,5,6,8<br>,18,19 | 2,7,17,20,<br>21,22,23,2<br>4 | 3  | P01681,P52590,Q05702                                                                                                   |
| 3048 | 1,3,4,5,6,8<br>,18,20 | 2,7,17,19,<br>21,22,23,2<br>4 | 11 | P01681,P06911,P18418,Q05702,Q4FZU2,Q6IFU7,Q6IFW6,Q6IG02,Q6IMF3,Q6P6Q2,Q9R168                                           |
| 3049 | 1,3,4,5,6,8<br>,18,21 | 2,7,17,19,<br>20,22,23,2<br>4 | 11 | O89117,P01681,P02625,P08937,Q05702,Q4FZU2,Q6IFU7,Q6IFW6,Q6IG02,Q6IMF3,Q6P6Q2                                           |
| 3050 | 1,3,4,5,6,8<br>,18,22 | 2,7,17,19,<br>20,21,23,2<br>4 | 8  | P01681,P23593,P49134,P54921,P97580,Q05702,Q09030,Q6IFU7                                                                |
| 3051 | 1,3,4,5,6,8<br>,18,23 | 2,7,17,19,<br>20,21,22,2<br>4 | 7  | O70594,P01681,P49134,P54921,Q05702,Q09030,Q6IG02                                                                       |
| 3052 | 1,3,4,5,6,8<br>,18,24 | 2,7,17,19,<br>20,21,22,2<br>3 | 11 | P01681,P23593,P49134,Q05702,Q4FZU2,Q4KLZ6,Q6IFU7,Q6IFW6,Q6IG02,Q6IMF3,Q6P6Q2                                           |
| 3053 | 1,3,4,5,6,8<br>,19,20 | 2,7,17,18,<br>21,22,23,2<br>4 | 17 | P01681,P02780,P06911,P14046,P19218,P22282,P25031,P42854,P52590,Q05702,Q4FZU2,Q5I0D1,Q6IFW6,Q6IG02,Q6IMF3,Q6P6Q2,Q9JI85 |
| 3054 | 1,3,4,5,6,8<br>,19,21 | 2,7,17,18,<br>20,22,23,2<br>4 | 12 | P01681,P08937,P14046,P30919,P52590,Q05702,Q10743,Q4FZU2,Q6IFW6,Q6IG02,Q6IMF3,Q6P6Q2                                    |
| 3055 | 1,3,4,5,6,8<br>,19,22 | 2,7,17,18,<br>20,21,23,2<br>4 | 11 | P00507,P01681,P01946,P15399,P19218,P30919,P42854,P52590,P97580,Q05702,Q99041                                           |
| 3056 | 1,3,4,5,6,8<br>,19,23 | 2,7,17,18,<br>20,21,22,2<br>4 | 10 | P01681,P02783,P25809,P42854,P52590,Q05702,Q09030,Q4FZU2,Q6IG02,Q6IMF3                                                  |
| 3057 | 1,3,4,5,6,8<br>,19,24 | 2,7,17,18,<br>20,21,22,2<br>3 | 11 | O54728,P01681,P25809,P30919,Q05702,Q10743,Q4FZU2,Q6IFW6,Q6IG02,Q6IMF3,Q6P6Q2                                           |
| 3058 | 1,3,4,5,6,8<br>,20,21 | 2,7,17,18,<br>19,22,23,2<br>4 | 16 | P01681,P02780,P14046,P19629,P25031,P47967,Q05702,Q10743,Q4FZU2,Q5I0D1,Q6IFU7,Q6IFW6,Q6IG02,Q6IMF3,Q6P6Q2,Q9JI85        |

|      |                        |                               |    |                                                                                                                        |
|------|------------------------|-------------------------------|----|------------------------------------------------------------------------------------------------------------------------|
| 3059 | 1,3,4,5,6,8<br>,20,22  | 2,7,17,18,<br>19,21,23,2<br>4 | 15 | P01681,P06911,P15399,P19218,P23593,P25031,Q05702,Q09030,Q10743,Q4FZU2,Q6IFU7,Q6IFW6,Q6IG02,Q6IMF3,Q6P6Q2               |
| 3060 | 1,3,4,5,6,8<br>,20,23  | 2,7,17,18,<br>19,21,22,2<br>4 | 15 | P01681,P02783,P09656,P10758,P23739,P25031,P42854,Q05702,Q09030,Q4FZU2,Q6IFU7,Q6IFW6,Q6IG02,Q6IMF3,Q6P6Q2               |
| 3061 | 1,3,4,5,6,8<br>,20,24  | 2,7,17,18,<br>19,21,22,2<br>3 | 10 | P01681,P06911,Q05702,Q10743,Q4FZU2,Q6IFU7,Q6IFW6,Q6IG02,Q6IMF3,Q6P6Q2                                                  |
| 3062 | 1,3,4,5,6,8<br>,21,22  | 2,7,17,18,<br>19,20,23,2<br>4 | 13 | P01681,P01946,P23593,P30919,Q05702,Q09030,Q10743,Q4FZU2,Q6IFU7,Q6IFW6,Q6IG02,Q6IMF3,Q6P6Q2                             |
| 3063 | 1,3,4,5,6,8<br>,21,23  | 2,7,17,18,<br>19,20,22,2<br>4 | 13 | P01681,P02783,P09656,P30919,P54921,Q05702,Q09030,Q4FZU2,Q6IFU7,Q6IFW6,Q6IG02,Q6IMF3,Q6P6Q2                             |
| 3064 | 1,3,4,5,6,8<br>,21,24  | 2,7,17,18,<br>19,20,22,2<br>3 | 13 | P01681,P02625,P30919,P36860,Q05702,Q09030,Q10743,Q4FZU2,Q6IFU7,Q6IFW6,Q6IG02,Q6IMF3,Q6P6Q2                             |
| 3065 | 1,3,4,5,6,8<br>,22,23  | 2,7,17,18,<br>19,20,21,2<br>4 | 17 | P00507,P01681,P02783,P09656,P19218,P20760,P23593,P25809,P30919,P42854,P54921,P62804,Q05702,Q09030,Q63532,Q6IG02,Q6P6R2 |
| 3066 | 1,3,4,5,6,8<br>,22,24  | 2,7,17,18,<br>19,20,21,2<br>3 | 16 | P00507,P01681,P23593,P25809,P30919,P49134,P62804,Q05702,Q09030,Q10743,Q4FZU2,Q6IFW6,Q6IG02,Q6IMF3,Q6P6Q2,Q6P6R2        |
| 3067 | 1,3,4,5,6,8<br>,23,24  | 2,7,17,18,<br>19,20,21,2<br>2 | 14 | P01681,P20760,P23593,P25809,P30919,P62804,Q05702,Q09030,Q4FZU2,Q6IFW6,Q6IG02,Q6IMF3,Q6P6Q2,Q6P6R2                      |
| 3068 | 1,3,4,5,6,1<br>7,18,19 | 2,7,8,20,2<br>1,22,23,24      | 1  | Q06000                                                                                                                 |
| 3069 | 1,3,4,5,6,1<br>7,18,20 | 2,7,8,19,2<br>1,22,23,24      | 1  | Q06000                                                                                                                 |
| 3070 | 1,3,4,5,6,1<br>7,18,21 | 2,7,8,19,2<br>0,22,23,24      | 1  | P36860                                                                                                                 |
| 3071 | 1,3,4,5,6,1<br>7,18,22 | 2,7,8,19,2<br>0,21,23,24      | 5  | P01946,P02091,P62804,Q06000,Q812E4                                                                                     |
| 3072 | 1,3,4,5,6,1<br>7,18,23 | 2,7,8,19,2<br>0,21,22,24      | 2  | P30120,P62804                                                                                                          |
| 3073 | 1,3,4,5,6,1<br>7,18,24 | 2,7,8,19,2<br>0,21,22,23      | 3  | P62804,Q4KLZ6,Q9WTT6                                                                                                   |
| 3074 | 1,3,4,5,6,1<br>7,19,20 | 2,7,8,18,2<br>1,22,23,24      | 1  | Q6IG02                                                                                                                 |

|      |                        |                          |                                                                          |
|------|------------------------|--------------------------|--------------------------------------------------------------------------|
| 3075 | 1,3,4,5,6,1<br>7,19,21 | 2,7,8,18,2<br>0,22,23,24 | 1 P52590                                                                 |
| 3076 | 1,3,4,5,6,1<br>7,19,22 | 2,7,8,18,2<br>0,21,23,24 | 3 P01946,P02091,P25809                                                   |
| 3077 | 1,3,4,5,6,1<br>7,19,23 | 2,7,8,18,2<br>0,21,22,24 | 1 P25809                                                                 |
| 3078 | 1,3,4,5,6,1<br>7,19,24 | 2,7,8,18,2<br>0,21,22,23 | 2 P25809,P62804                                                          |
| 3079 | 1,3,4,5,6,1<br>7,20,21 | 2,7,8,18,1<br>9,22,23,24 | 1 Q6IG02                                                                 |
| 3080 | 1,3,4,5,6,1<br>7,20,22 | 2,7,8,18,1<br>9,21,23,24 | 3 P01946,P02091,P20766                                                   |
| 3081 | 1,3,4,5,6,1<br>7,20,23 | 2,7,8,18,1<br>9,21,22,24 | 3 P09656,P23739,Q6IG02                                                   |
| 3082 | 1,3,4,5,6,1<br>7,20,24 | 2,7,8,18,1<br>9,21,22,23 | 2 P62804,Q6IG02                                                          |
| 3083 | 1,3,4,5,6,1<br>7,21,22 | 2,7,8,18,1<br>9,20,23,24 | 3 P01946,P02091,P20766                                                   |
| 3084 | 1,3,4,5,6,1<br>7,21,23 | 2,7,8,18,1<br>9,20,22,24 | 2 P09656,P36860                                                          |
| 3085 | 1,3,4,5,6,1<br>7,21,24 | 2,7,8,18,1<br>9,20,22,23 | 3 P36860,Q4FZU2,Q6IG02                                                   |
| 3086 | 1,3,4,5,6,1<br>7,22,23 | 2,7,8,18,1<br>9,20,21,24 | 10 P01946,P02091,P02783,P25809,P30120,P47727,P62804,Q00715,Q09030,Q9WTT6 |
| 3087 | 1,3,4,5,6,1<br>7,22,24 | 2,7,8,18,1<br>9,20,21,23 | 7 P01946,P02091,P23593,P25809,P62804,Q00715,Q9WTT6                       |
| 3088 | 1,3,4,5,6,1<br>7,23,24 | 2,7,8,18,1<br>9,20,21,22 | 4 P25809,P62804,Q00715,Q9WTT6                                            |
| 3089 | 1,3,4,5,6,1<br>8,19,20 | 2,7,8,17,2<br>1,22,23,24 | 2 P97840,Q5I0D1                                                          |
| 3090 | 1,3,4,5,6,1<br>8,19,21 | 2,7,8,17,2<br>0,22,23,24 | 0                                                                        |
| 3091 | 1,3,4,5,6,1<br>8,19,22 | 2,7,8,17,2<br>0,21,23,24 | 1 P01946                                                                 |
| 3092 | 1,3,4,5,6,1<br>8,19,23 | 2,7,8,17,2<br>0,21,22,24 | 1 P25809                                                                 |
| 3093 | 1,3,4,5,6,1<br>8,19,24 | 2,7,8,17,2<br>0,21,22,23 | 4 P25809,P62804,Q4KLZ6,Q9WTT6                                            |
| 3094 | 1,3,4,5,6,1<br>8,20,21 | 2,7,8,17,1<br>9,22,23,24 | 3 P47967,P97840,Q6IG02                                                   |

|      |                        |                          |                                                                                 |
|------|------------------------|--------------------------|---------------------------------------------------------------------------------|
| 3095 | 1,3,4,5,6,1<br>8,20,22 | 2,7,8,17,1<br>9,21,23,24 | 0                                                                               |
| 3096 | 1,3,4,5,6,1<br>8,20,23 | 2,7,8,17,1<br>9,21,22,24 | 0                                                                               |
| 3097 | 1,3,4,5,6,1<br>8,20,24 | 2,7,8,17,1<br>9,21,22,23 | 2 P62804,Q4KLZ6                                                                 |
| 3098 | 1,3,4,5,6,1<br>8,21,22 | 2,7,8,17,1<br>9,20,23,24 | 2 P01946,Q9WTT6                                                                 |
| 3099 | 1,3,4,5,6,1<br>8,21,23 | 2,7,8,17,1<br>9,20,22,24 | 4 O89117,P09656,P54921,Q9WTT6                                                   |
| 3100 | 1,3,4,5,6,1<br>8,21,24 | 2,7,8,17,1<br>9,20,22,23 | 4 O89117,P36860,Q4KLZ6,Q9WTT6                                                   |
| 3101 | 1,3,4,5,6,1<br>8,22,23 | 2,7,8,17,1<br>9,20,21,24 | 11 P02783,P09456,P13676,P25809,P30120,P47727,P54921,P62804,Q6P6R2,Q9EQS0,Q9WTT6 |
| 3102 | 1,3,4,5,6,1<br>8,22,24 | 2,7,8,17,1<br>9,20,21,23 | 7 P13676,P25809,P62804,Q4KLZ6,Q6P6R2,Q9QX74,Q9WTT6                              |
| 3103 | 1,3,4,5,6,1<br>8,23,24 | 2,7,8,17,1<br>9,20,21,22 | 8 O89117,P13676,P25809,P62804,Q4KLZ6,Q6P6R2,Q9QX74,Q9WTT6                       |
| 3104 | 1,3,4,5,6,1<br>9,20,21 | 2,7,8,17,1<br>8,22,23,24 | 4 P47967,P97840,Q5I0D1,Q6IG02                                                   |
| 3105 | 1,3,4,5,6,1<br>9,20,22 | 2,7,8,17,1<br>8,21,23,24 | 2 P01946,P19218                                                                 |
| 3106 | 1,3,4,5,6,1<br>9,20,23 | 2,7,8,17,1<br>8,21,22,24 | 4 P02783,P10758,P23739,P42854                                                   |
| 3107 | 1,3,4,5,6,1<br>9,20,24 | 2,7,8,17,1<br>8,21,22,23 | 1 Q6IG02                                                                        |
| 3108 | 1,3,4,5,6,1<br>9,21,22 | 2,7,8,17,1<br>8,20,23,24 | 3 P01946,P02091,P30919                                                          |
| 3109 | 1,3,4,5,6,1<br>9,21,23 | 2,7,8,17,1<br>8,20,22,24 | 3 P02783,P09656,P25809                                                          |
| 3110 | 1,3,4,5,6,1<br>9,21,24 | 2,7,8,17,1<br>8,20,22,23 | 2 P25809,P30919                                                                 |
| 3111 | 1,3,4,5,6,1<br>9,22,23 | 2,7,8,17,1<br>8,20,21,24 | 11 P00507,P01946,P02091,P02783,P25809,P30120,P47727,P62804,Q00715,Q811M5,Q9WTT6 |
| 3112 | 1,3,4,5,6,1<br>9,22,24 | 2,7,8,17,1<br>8,20,21,23 | 9 P00507,P01946,P25809,P30919,P55091,P62804,Q00715,Q6P6R2,Q9WTT6                |
| 3113 | 1,3,4,5,6,1<br>9,23,24 | 2,7,8,17,1<br>8,20,21,22 | 5 P25809,P30919,P62804,Q00715,Q9WTT6                                            |
| 3114 | 1,3,4,5,6,2<br>0,21,22 | 2,7,8,17,1<br>8,19,23,24 | 3 P01946,P20766,Q6IG02                                                          |

|      |                        |                               |    |                                                                                                                        |
|------|------------------------|-------------------------------|----|------------------------------------------------------------------------------------------------------------------------|
| 3115 | 1,3,4,5,6,2<br>0,21,23 | 2,7,8,17,1<br>8,19,22,24      | 3  | P02783,P09656,Q6IG02                                                                                                   |
| 3116 | 1,3,4,5,6,2<br>0,21,24 | 2,7,8,17,1<br>8,19,22,23      | 1  | Q6IG02                                                                                                                 |
| 3117 | 1,3,4,5,6,2<br>0,22,23 | 2,7,8,17,1<br>8,19,21,24      | 7  | P02783,P09656,P23739,P62804,Q00715,Q66H69,Q9QX74                                                                       |
| 3118 | 1,3,4,5,6,2<br>0,22,24 | 2,7,8,17,1<br>8,19,21,23      | 4  | P22006,P62804,Q6P6R2,Q9QX74                                                                                            |
| 3119 | 1,3,4,5,6,2<br>0,23,24 | 2,7,8,17,1<br>8,19,21,22      | 6  | P09656,P23739,P62804,Q6IG02,Q6P6R2,Q9QX74                                                                              |
| 3120 | 1,3,4,5,6,2<br>1,22,23 | 2,7,8,17,1<br>8,19,20,24      | 9  | P01946,P02783,P09656,P25809,P30919,P47727,P54921,Q09030,Q9WTT6                                                         |
| 3121 | 1,3,4,5,6,2<br>1,22,24 | 2,7,8,17,1<br>8,19,20,23      | 5  | P01946,P25809,P30919,P36860,Q9WTT6                                                                                     |
| 3122 | 1,3,4,5,6,2<br>1,23,24 | 2,7,8,17,1<br>8,19,20,22      | 5  | P09656,P25809,P30919,P36860,Q9WTT6                                                                                     |
| 3123 | 1,3,4,5,6,2<br>2,23,24 | 2,7,8,17,1<br>8,19,20,21      | 16 | P00507,P01946,P02783,P06760,P09656,P13676,P25809,P30919,P47727,P62804,Q00715,Q09030,Q6P6R2,Q811M5,Q9QX74,Q9WTT6        |
| 3124 | 1,3,4,5,7,8<br>,17,18  | 2,6,19,20,<br>21,22,23,2<br>4 | 10 | O70417,O70594,P01681,P49134,Q4FZU2,Q6IFW6,Q6IG02,Q6IMF3,Q6P6Q2,Q811M5                                                  |
| 3125 | 1,3,4,5,7,8<br>,17,19  | 2,6,18,20,<br>21,22,23,2<br>4 | 10 | O70417,O70594,P01681,P01835,P20646,Q4FZU2,Q6IFW6,Q6IG02,Q6IMF3,Q6P6Q2                                                  |
| 3126 | 1,3,4,5,7,8<br>,17,20  | 2,6,18,19,<br>21,22,23,2<br>4 | 17 | D4A5U3,O70417,P01681,P02780,P06911,P13676,P28648,P97697,P97840,Q4FZU2,Q4G075,Q62946,Q6IFW6,Q6IG02,Q6IMF3,Q6P6Q2,Q811M5 |
| 3127 | 1,3,4,5,7,8<br>,17,21  | 2,6,18,19,<br>20,22,23,2<br>4 | 12 | O70594,P01681,P06760,P22006,Q4FZU2,Q6IFU8,Q6IFW6,Q6IG02,Q6IMF3,Q6P6Q2,Q811M5,Q9QX74                                    |
| 3128 | 1,3,4,5,7,8<br>,17,22  | 2,6,18,19,<br>20,21,23,2<br>4 | 12 | O70417,P01681,P23593,P27590,P35280,P49134,Q4FZU2,Q68G31,Q6IFW6,Q6IG02,Q6IMF3,Q6P6Q2                                    |
| 3129 | 1,3,4,5,7,8<br>,17,23  | 2,6,18,19,<br>20,21,22,2<br>4 | 9  | O70594,P01681,P49134,Q4FZU2,Q68G31,Q6IFW6,Q6IG02,Q6IMF3,Q6P6Q2                                                         |
| 3130 | 1,3,4,5,7,8<br>,17,24  | 2,6,18,19,<br>20,21,22,2<br>3 | 10 | O70417,P01681,P23593,P49134,Q4FZU2,Q6IFW6,Q6IG02,Q6IMF3,Q6P6Q2,Q811M5                                                  |

|      |                       |                               |    |                                                                                                                                      |
|------|-----------------------|-------------------------------|----|--------------------------------------------------------------------------------------------------------------------------------------|
| 3131 | 1,3,4,5,7,8<br>,18,19 | 2,6,17,20,<br>21,22,23,2<br>4 | 9  | O35077,P01681,P47967,P63029,P97840,Q4FZU2,Q6IFW6,Q6IMF3,Q6P6Q2                                                                       |
| 3132 | 1,3,4,5,7,8<br>,18,20 | 2,6,17,19,<br>21,22,23,2<br>4 | 14 | O70417,P01681,P02780,P47967,P97840,Q4FZU2,Q4G075,Q5I0D1,Q6IFW6,Q6IG02,Q6IMF3,Q6P6Q2,Q811M5,Q9R168                                    |
| 3133 | 1,3,4,5,7,8<br>,18,21 | 2,6,17,19,<br>20,22,23,2<br>4 | 12 | O89117,P01681,P02625,P47967,P49134,P97840,Q4FZU2,Q6IFW6,Q6IG02,Q6IMF3,Q6P6Q2,Q811M5                                                  |
| 3134 | 1,3,4,5,7,8<br>,18,22 | 2,6,17,19,<br>20,21,23,2<br>4 | 10 | P01681,P23593,P27590,P35280,P49134,P97840,Q4FZU2,Q6IFW6,Q6IMF3,Q6P6Q2                                                                |
| 3135 | 1,3,4,5,7,8<br>,18,23 | 2,6,17,19,<br>20,21,22,2<br>4 | 12 | O35077,O70594,O89117,P01681,P49134,P97840,Q4FZU2,Q6IFW6,Q6IG02,Q6IMF3,Q6P6Q2,Q8R431                                                  |
| 3136 | 1,3,4,5,7,8<br>,18,24 | 2,6,17,19,<br>20,21,22,2<br>3 | 9  | O89117,P01681,P49134,P63029,Q4FZU2,Q6IFW6,Q6IG02,Q6IMF3,Q6P6Q2                                                                       |
| 3137 | 1,3,4,5,7,8<br>,19,20 | 2,6,17,18,<br>21,22,23,2<br>4 | 16 | D3ZUC6,O70417,P01681,P02780,P10758,P22282,P36374,P47967,P97840,Q4FZU2,Q4G075,Q5I0D1,Q6IFW6,Q6IG02,Q6IMF3,Q6P6Q2                      |
| 3138 | 1,3,4,5,7,8<br>,19,21 | 2,6,17,18,<br>20,22,23,2<br>4 | 15 | D3ZUC6,O35077,P01681,P06760,P08937,P22006,P47967,P97840,Q4FZU2,Q63493,Q66H69,Q6IFW6,Q6IG02,Q6IMF3,Q6P6Q2                             |
| 3139 | 1,3,4,5,7,8<br>,19,22 | 2,6,17,18,<br>20,21,23,2<br>4 | 11 | P01681,P19218,P27590,P35280,P97840,Q4FZU2,Q6IFW6,Q6IG02,Q6IMF3,Q6P6Q2,Q99041                                                         |
| 3140 | 1,3,4,5,7,8<br>,19,23 | 2,6,17,18,<br>20,21,22,2<br>4 | 8  | O35077,P01681,P10758,Q4FZU2,Q6IFW6,Q6IG02,Q6IMF3,Q6P6Q2                                                                              |
| 3141 | 1,3,4,5,7,8<br>,19,24 | 2,6,17,18,<br>20,21,22,2<br>3 | 8  | O54728,P01681,P63029,Q4FZU2,Q6IFW6,Q6IG02,Q6IMF3,Q6P6Q2                                                                              |
| 3142 | 1,3,4,5,7,8<br>,20,21 | 2,6,17,18,<br>19,22,23,2<br>4 | 19 | D3ZUC6,P01681,P02780,P06760,P08649,P22273,P47967,P97840,Q4FZU2,Q4G075,Q5I0D1,Q62946,Q63493,Q6IFU8,Q6IFW6,Q6IG02,Q6IMF3,Q6P6Q2,Q811M5 |
| 3143 | 1,3,4,5,7,8<br>,20,22 | 2,6,17,18,<br>19,21,23,2<br>4 | 14 | O70417,P01681,P02780,P23593,P27590,P35280,P47967,P97840,Q4FZU2,Q4G075,Q6IFW6,Q6IG02,Q6IMF3,Q6P6Q2                                    |



|      |                        |                               |    |                                                                                            |
|------|------------------------|-------------------------------|----|--------------------------------------------------------------------------------------------|
| 3144 | 1,3,4,5,7,8<br>,20,23  | 2,6,17,18,<br>19,21,22,2<br>4 | 10 | P01681,P10758,P23739,P97840,Q4FZU2,Q4G075,Q6IFW6,Q6IG02,Q6IMF3,Q6P6Q2                      |
| 3145 | 1,3,4,5,7,8<br>,20,24  | 2,6,17,18,<br>19,21,22,2<br>3 | 11 | P01681,P02780,P97840,Q4FZU2,Q4G075,Q6IFU8,Q6IFW6,Q6IG02,Q6IMF3,Q6P6Q2,Q811M5               |
| 3146 | 1,3,4,5,7,8<br>,21,22  | 2,6,17,18,<br>19,20,23,2<br>4 | 11 | P01681,P08649,P27590,P35280,P49134,P97840,Q4FZU2,Q6IFW6,Q6IG02,Q6IMF3,Q6P6Q2               |
| 3147 | 1,3,4,5,7,8<br>,21,23  | 2,6,17,18,<br>19,20,22,2<br>4 | 10 | O35077,O89117,P01681,P08649,P49134,Q4FZU2,Q6IFW6,Q6IG02,Q6IMF3,Q6P6Q2                      |
| 3148 | 1,3,4,5,7,8<br>,21,24  | 2,6,17,18,<br>19,20,22,2<br>3 | 13 | O89117,P01681,P04762,P08649,P30919,P36860,P49134,Q4FZU2,Q6IFU8,Q6IFW6,Q6IG02,Q6IMF3,Q6P6Q2 |
| 3149 | 1,3,4,5,7,8<br>,22,23  | 2,6,17,18,<br>19,20,21,2<br>4 | 11 | P01681,P23593,P27590,P35280,P49134,Q4FZU2,Q68G31,Q6IFW6,Q6IG02,Q6IMF3,Q6P6Q2               |
| 3150 | 1,3,4,5,7,8<br>,22,24  | 2,6,17,18,<br>19,20,21,2<br>3 | 11 | P01681,P23593,P27590,P35280,P49134,Q4FZU2,Q6IFW6,Q6IG02,Q6IMF3,Q6P6Q2,Q6P6R2               |
| 3151 | 1,3,4,5,7,8<br>,23,24  | 2,6,17,18,<br>19,20,21,2<br>2 | 10 | P01681,P20761,P25809,P49134,Q4FZU2,Q6IFW6,Q6IG02,Q6IMF3,Q6P6Q2,Q6P6R2                      |
| 3152 | 1,3,4,5,7,1<br>7,18,19 | 2,6,8,20,2<br>1,22,23,24      | 1  | P97840                                                                                     |
| 3153 | 1,3,4,5,7,1<br>7,18,20 | 2,6,8,19,2<br>1,22,23,24      | 3  | P47967,P97840,Q811M5                                                                       |
| 3154 | 1,3,4,5,7,1<br>7,18,21 | 2,6,8,19,2<br>0,22,23,24      | 2  | P97840,Q811M5                                                                              |
| 3155 | 1,3,4,5,7,1<br>7,18,22 | 2,6,8,19,2<br>0,21,23,24      | 2  | P97840,Q68G31                                                                              |
| 3156 | 1,3,4,5,7,1<br>7,18,23 | 2,6,8,19,2<br>0,21,22,24      | 3  | O70594,P97840,Q68G31                                                                       |
| 3157 | 1,3,4,5,7,1<br>7,18,24 | 2,6,8,19,2<br>0,21,22,23      | 0  |                                                                                            |
| 3158 | 1,3,4,5,7,1<br>7,19,20 | 2,6,8,18,2<br>1,22,23,24      | 5  | P20646,P47967,P97840,Q5I0D1,Q6IG02                                                         |
| 3159 | 1,3,4,5,7,1<br>7,19,21 | 2,6,8,18,2<br>0,22,23,24      | 6  | P22006,P35053,P47967,P97840,Q4FZU2,Q62761;Q62762;Q62763                                    |

|      |                        |                          |                                                                  |
|------|------------------------|--------------------------|------------------------------------------------------------------|
| 3160 | 1,3,4,5,7,1<br>7,19,22 | 2,6,8,18,2<br>0,21,23,24 | 1 P97840                                                         |
| 3161 | 1,3,4,5,7,1<br>7,19,23 | 2,6,8,18,2<br>0,21,22,24 | 2 P01681,P25809                                                  |
| 3162 | 1,3,4,5,7,1<br>7,19,24 | 2,6,8,18,2<br>0,21,22,23 | 4 P25809,P54921,Q4FZU2,Q62761;Q62762;Q62763                      |
| 3163 | 1,3,4,5,7,1<br>7,20,21 | 2,6,8,18,1<br>9,22,23,24 | 9 P19223,P47967,P97840,Q4FZU2,Q5I0D1,Q6IFW6,Q6IG02,Q6P6Q2,Q811M5 |
| 3164 | 1,3,4,5,7,1<br>7,20,22 | 2,6,8,18,1<br>9,21,23,24 | 3 P97840,Q68G31,Q6IG02                                           |
| 3165 | 1,3,4,5,7,1<br>7,20,23 | 2,6,8,18,1<br>9,21,22,24 | 5 P10758,P23739,P97840,Q68G31,Q6IG02                             |
| 3166 | 1,3,4,5,7,1<br>7,20,24 | 2,6,8,18,1<br>9,21,22,23 | 6 P97840,Q4FZU2,Q6IFW6,Q6IG02,Q6P6Q2,Q811M5                      |
| 3167 | 1,3,4,5,7,1<br>7,21,22 | 2,6,8,18,1<br>9,20,23,24 | 3 P97840,Q68G31,Q9R168                                           |
| 3168 | 1,3,4,5,7,1<br>7,21,23 | 2,6,8,18,1<br>9,20,22,24 | 4 P08649,P22006,Q4FZU2,Q68G31                                    |
| 3169 | 1,3,4,5,7,1<br>7,21,24 | 2,6,8,18,1<br>9,20,22,23 | 7 P04762,P08649,P36860,Q4FZU2,Q6AY61,Q6IFW6,Q6IG02               |
| 3170 | 1,3,4,5,7,1<br>7,22,23 | 2,6,8,18,1<br>9,20,21,24 | 2 P25809,Q68G31                                                  |
| 3171 | 1,3,4,5,7,1<br>7,22,24 | 2,6,8,18,1<br>9,20,21,23 | 2 P25809,Q68G31                                                  |
| 3172 | 1,3,4,5,7,1<br>7,23,24 | 2,6,8,18,1<br>9,20,21,22 | 3 P25809,Q4FZU2,Q68G31                                           |
| 3173 | 1,3,4,5,7,1<br>8,19,20 | 2,6,8,17,2<br>1,22,23,24 | 4 P10758,P47967,P97840,Q5I0D1                                    |
| 3174 | 1,3,4,5,7,1<br>8,19,21 | 2,6,8,17,2<br>0,22,23,24 | 3 O89117,P47967,P97840                                           |
| 3175 | 1,3,4,5,7,1<br>8,19,22 | 2,6,8,17,2<br>0,21,23,24 | 2 P63029,P97840                                                  |
| 3176 | 1,3,4,5,7,1<br>8,19,23 | 2,6,8,17,2<br>0,21,22,24 | 2 P63029,P97840                                                  |
| 3177 | 1,3,4,5,7,1<br>8,19,24 | 2,6,8,17,2<br>0,21,22,23 | 3 P25809,P63029,P97840                                           |
| 3178 | 1,3,4,5,7,1<br>8,20,21 | 2,6,8,17,1<br>9,22,23,24 | 6 O89117,P47967,P97840,Q5I0D1,Q6IG02,Q811M5                      |
| 3179 | 1,3,4,5,7,1<br>8,20,22 | 2,6,8,17,1<br>9,21,23,24 | 2 P47967,P97840                                                  |

|      |                        |                          |   |                                                         |
|------|------------------------|--------------------------|---|---------------------------------------------------------|
| 3180 | 1,3,4,5,7,1<br>8,20,23 | 2,6,8,17,1<br>9,21,22,24 | 2 | P10758,P97840                                           |
| 3181 | 1,3,4,5,7,1<br>8,20,24 | 2,6,8,17,1<br>9,21,22,23 | 3 | P47967,P97840,Q6IG02                                    |
| 3182 | 1,3,4,5,7,1<br>8,21,22 | 2,6,8,17,1<br>9,20,23,24 | 4 | O89117,P47967,P97840,Q68G31                             |
| 3183 | 1,3,4,5,7,1<br>8,21,23 | 2,6,8,17,1<br>9,20,22,24 | 3 | O89117,P97840,Q68G31                                    |
| 3184 | 1,3,4,5,7,1<br>8,21,24 | 2,6,8,17,1<br>9,20,22,23 | 2 | O89117,P97840                                           |
| 3185 | 1,3,4,5,7,1<br>8,22,23 | 2,6,8,17,1<br>9,20,21,24 | 6 | P25809,P30120,P47727,P97840,Q68G31,Q6P6R2               |
| 3186 | 1,3,4,5,7,1<br>8,22,24 | 2,6,8,17,1<br>9,20,21,23 | 4 | P25809,P63029,P97840,Q6P6R2                             |
| 3187 | 1,3,4,5,7,1<br>8,23,24 | 2,6,8,17,1<br>9,20,21,22 | 5 | O89117,P25809,P63029,P97840,Q6P6R2                      |
| 3188 | 1,3,4,5,7,1<br>9,20,21 | 2,6,8,17,1<br>8,22,23,24 | 6 | D3ZUC6,P08649,P47967,P97840,Q5I0D1,Q6IG02               |
| 3189 | 1,3,4,5,7,1<br>9,20,22 | 2,6,8,17,1<br>8,21,23,24 | 3 | P47967,P97840,Q5I0D1                                    |
| 3190 | 1,3,4,5,7,1<br>9,20,23 | 2,6,8,17,1<br>8,21,22,24 | 6 | P08649,P10758,P23739,P47967,P97840,Q5I0D1               |
| 3191 | 1,3,4,5,7,1<br>9,20,24 | 2,6,8,17,1<br>8,21,22,23 | 6 | P08649,P10758,P47967,P97840,Q5I0D1,Q6IG02               |
| 3192 | 1,3,4,5,7,1<br>9,21,22 | 2,6,8,17,1<br>8,20,23,24 | 3 | P08649,P47967,P97840                                    |
| 3193 | 1,3,4,5,7,1<br>9,21,23 | 2,6,8,17,1<br>8,20,22,24 | 2 | P08649,P97840                                           |
| 3194 | 1,3,4,5,7,1<br>9,21,24 | 2,6,8,17,1<br>8,20,22,23 | 6 | P08649,P47967,P97840,Q62761;Q62762;Q62763,Q6IFW6,Q99MH3 |
| 3195 | 1,3,4,5,7,1<br>9,22,23 | 2,6,8,17,1<br>8,20,21,24 | 4 | P25809,P47727,P97840,Q68G31                             |
| 3196 | 1,3,4,5,7,1<br>9,22,24 | 2,6,8,17,1<br>8,20,21,23 | 4 | P25809,P55091,P63029,P97840                             |
| 3197 | 1,3,4,5,7,1<br>9,23,24 | 2,6,8,17,1<br>8,20,21,22 | 3 | P08649,P25809,P63029                                    |
| 3198 | 1,3,4,5,7,2<br>0,21,22 | 2,6,8,17,1<br>8,19,23,24 | 4 | P08649,P47967,P97840,Q6IG02                             |
| 3199 | 1,3,4,5,7,2<br>0,21,23 | 2,6,8,17,1<br>8,19,22,24 | 6 | P08649,P10758,P23739,P47967,P97840,Q6IG02               |

|      |                        |                          |    |                                                                                     |
|------|------------------------|--------------------------|----|-------------------------------------------------------------------------------------|
| 3200 | 1,3,4,5,7,2<br>0,21,24 | 2,6,8,17,1<br>8,19,22,23 | 7  | P08649,P47967,P97840,Q4FZU2,Q6IFW6,Q6IG02,Q6P6Q2                                    |
| 3201 | 1,3,4,5,7,2<br>0,22,23 | 2,6,8,17,1<br>8,19,21,24 | 5  | P08649,P10758,P23739,P97840,Q68G31                                                  |
| 3202 | 1,3,4,5,7,2<br>0,22,24 | 2,6,8,17,1<br>8,19,21,23 | 3  | P08649,P97840,Q6IG02                                                                |
| 3203 | 1,3,4,5,7,2<br>0,23,24 | 2,6,8,17,1<br>8,19,21,22 | 6  | P08649,P10758,P23739,P97840,Q6IG02,Q9QYP1                                           |
| 3204 | 1,3,4,5,7,2<br>1,22,23 | 2,6,8,17,1<br>8,19,20,24 | 4  | P08649,P47727,P97840,Q68G31                                                         |
| 3205 | 1,3,4,5,7,2<br>1,22,24 | 2,6,8,17,1<br>8,19,20,23 | 4  | P08649,P25809,P97840,Q6IFW6                                                         |
| 3206 | 1,3,4,5,7,2<br>1,23,24 | 2,6,8,17,1<br>8,19,20,22 | 6  | O89117,P08649,P25809,P36860,Q4FZU2,Q6IFW6                                           |
| 3207 | 1,3,4,5,7,2<br>2,23,24 | 2,6,8,17,1<br>8,19,20,21 | 7  | P08649,P25809,P47727,P62804,Q00715,Q68G31,Q6P6R2                                    |
| 3208 | 1,3,4,5,8,1<br>7,18,19 | 2,6,7,20,2<br>1,22,23,24 | 6  | P01681,P01835,Q4FZU2,Q6IG02,Q6IMF3,Q6P6Q2                                           |
| 3209 | 1,3,4,5,8,1<br>7,18,20 | 2,6,7,19,2<br>1,22,23,24 | 10 | P01681,P01835,Q4FZU2,Q6IFU7,Q6IFW6,Q6IG02,Q6IMF3,Q6P6Q2,Q811M5,Q9R168               |
| 3210 | 1,3,4,5,8,1<br>7,18,21 | 2,6,7,19,2<br>0,22,23,24 | 9  | P01681,P22006,Q4FZU2,Q6IFU7,Q6IFW6,Q6IG02,Q6IMF3,Q6P6Q2,Q811M5                      |
| 3211 | 1,3,4,5,8,1<br>7,18,22 | 2,6,7,19,2<br>0,21,23,24 | 4  | P01681,P01835,P27590,Q4FZU2                                                         |
| 3212 | 1,3,4,5,8,1<br>7,18,23 | 2,6,7,19,2<br>0,21,22,24 | 7  | P01681,P01835,Q4FZU2,Q6IFW6,Q6IG02,Q6IMF3,Q6P6Q2                                    |
| 3213 | 1,3,4,5,8,1<br>7,18,24 | 2,6,7,19,2<br>0,21,22,23 | 7  | P01681,P01835,Q4FZU2,Q6IFW6,Q6IG02,Q6IMF3,Q6P6Q2                                    |
| 3214 | 1,3,4,5,8,1<br>7,19,20 | 2,6,7,18,2<br>1,22,23,24 | 7  | P01681,P01835,Q4FZU2,Q6IFW6,Q6IG02,Q6IMF3,Q6P6Q2                                    |
| 3215 | 1,3,4,5,8,1<br>7,19,21 | 2,6,7,18,2<br>0,22,23,24 | 8  | P01681,P01835,P22006,Q4FZU2,Q6IFW6,Q6IG02,Q6IMF3,Q6P6Q2                             |
| 3216 | 1,3,4,5,8,1<br>7,19,22 | 2,6,7,18,2<br>0,21,23,24 | 7  | P01681,P01835,Q4FZU2,Q6IFW6,Q6IG02,Q6IMF3,Q6P6Q2                                    |
| 3217 | 1,3,4,5,8,1<br>7,19,23 | 2,6,7,18,2<br>0,21,22,24 | 7  | P01681,P01835,Q4FZU2,Q6IFW6,Q6IG02,Q6IMF3,Q6P6Q2                                    |
| 3218 | 1,3,4,5,8,1<br>7,19,24 | 2,6,7,18,2<br>0,21,22,23 | 8  | O54728,P01681,P01835,Q4FZU2,Q6IFW6,Q6IG02,Q6IMF3,Q6P6Q2                             |
| 3219 | 1,3,4,5,8,1<br>7,20,21 | 2,6,7,18,1<br>9,22,23,24 | 12 | P00762,P01681,P19223,Q10758,Q4FZU2,Q6IFU7,Q6IFU8,Q6IFW6,Q6IG02,Q6IMF3,Q6P6Q2,Q811M5 |

|      |                        |                          |    |                                                                                            |
|------|------------------------|--------------------------|----|--------------------------------------------------------------------------------------------|
| 3220 | 1,3,4,5,8,1<br>7,20,22 | 2,6,7,18,1<br>9,21,23,24 | 7  | P01681,Q4FZU2,Q6IFU7,Q6IFW6,Q6IG02,Q6IMF3,Q6P6Q2                                           |
| 3221 | 1,3,4,5,8,1<br>7,20,23 | 2,6,7,18,1<br>9,21,22,24 | 10 | P01681,P23739,P28648,P36376,Q4FZU2,Q6IFU7,Q6IFW6,Q6IG02,Q6IMF3,Q6P6Q2                      |
| 3222 | 1,3,4,5,8,1<br>7,20,24 | 2,6,7,18,1<br>9,21,22,23 | 8  | P01681,Q4FZU2,Q6IFU7,Q6IFW6,Q6IG02,Q6IMF3,Q6P6Q2,Q811M5                                    |
| 3223 | 1,3,4,5,8,1<br>7,21,22 | 2,6,7,18,1<br>9,20,23,24 | 6  | P01681,Q4FZU2,Q6IFW6,Q6IG02,Q6IMF3,Q6P6Q2                                                  |
| 3224 | 1,3,4,5,8,1<br>7,21,23 | 2,6,7,18,1<br>9,20,22,24 | 7  | P01681,P22006,Q4FZU2,Q6IFW6,Q6IG02,Q6IMF3,Q6P6Q2                                           |
| 3225 | 1,3,4,5,8,1<br>7,21,24 | 2,6,7,18,1<br>9,20,22,23 | 8  | P01681,Q4FZU2,Q6IFU7,Q6IFU8,Q6IFW6,Q6IG02,Q6IMF3,Q6P6Q2                                    |
| 3226 | 1,3,4,5,8,1<br>7,22,23 | 2,6,7,18,1<br>9,20,21,24 | 9  | P01681,P01835,P27590,Q4FZU2,Q68G31,Q6IFW6,Q6IG02,Q6IMF3,Q6P6Q2                             |
| 3227 | 1,3,4,5,8,1<br>7,22,24 | 2,6,7,18,1<br>9,20,21,23 | 7  | P01681,P23593,Q4FZU2,Q6IFW6,Q6IG02,Q6IMF3,Q6P6Q2                                           |
| 3228 | 1,3,4,5,8,1<br>7,23,24 | 2,6,7,18,1<br>9,20,21,22 | 7  | P01681,Q4FZU2,Q5PQL7,Q6IFW6,Q6IG02,Q6IMF3,Q6P6Q2                                           |
| 3229 | 1,3,4,5,8,1<br>8,19,20 | 2,6,7,17,2<br>1,22,23,24 | 9  | P01681,P01835,P47967,P97840,Q5I0D1,Q6IG02,Q6IMF3,Q6P6Q2,Q9R168                             |
| 3230 | 1,3,4,5,8,1<br>8,19,21 | 2,6,7,17,2<br>0,22,23,24 | 6  | P01681,Q4FZU2,Q6IFW6,Q6IG02,Q6IMF3,Q6P6Q2                                                  |
| 3231 | 1,3,4,5,8,1<br>8,19,22 | 2,6,7,17,2<br>0,21,23,24 | 3  | P01681,P01835,P27590                                                                       |
| 3232 | 1,3,4,5,8,1<br>8,19,23 | 2,6,7,17,2<br>0,21,22,24 | 3  | O35077,P01681,P01835                                                                       |
| 3233 | 1,3,4,5,8,1<br>8,19,24 | 2,6,7,17,2<br>0,21,22,23 | 9  | O54728,P01681,P01835,P63029,Q4FZU2,Q6IFW6,Q6IG02,Q6IMF3,Q6P6Q2                             |
| 3234 | 1,3,4,5,8,1<br>8,20,21 | 2,6,7,17,1<br>9,22,23,24 | 13 | D3ZUC6,P00762,P01681,P47967,P97840,Q4FZU2,Q6IFU7,Q6IFW6,Q6IG02,Q6IMF3,Q6P6Q2,Q811M5,Q9R168 |
| 3235 | 1,3,4,5,8,1<br>8,20,22 | 2,6,7,17,1<br>9,21,23,24 | 4  | P01681,Q6IG02,Q6P6Q2,Q9R168                                                                |
| 3236 | 1,3,4,5,8,1<br>8,20,23 | 2,6,7,17,1<br>9,21,22,24 | 8  | P01681,P10758,P23739,Q6IFW6,Q6IG02,Q6IMF3,Q6P6Q2,Q9R168                                    |
| 3237 | 1,3,4,5,8,1<br>8,20,24 | 2,6,7,17,1<br>9,21,22,23 | 8  | P01681,Q4FZU2,Q6IFU7,Q6IFW6,Q6IG02,Q6IMF3,Q6P6Q2,Q9R168                                    |
| 3238 | 1,3,4,5,8,1<br>8,21,22 | 2,6,7,17,1<br>9,20,23,24 | 4  | P01681,Q6IFW6,Q6IG02,Q6P6Q2                                                                |
| 3239 | 1,3,4,5,8,1<br>8,21,23 | 2,6,7,17,1<br>9,20,22,24 | 8  | O89117,P01681,P54921,Q4FZU2,Q6IFW6,Q6IG02,Q6IMF3,Q6P6Q2                                    |

|      |                        |                          |    |                                                                              |
|------|------------------------|--------------------------|----|------------------------------------------------------------------------------|
| 3240 | 1,3,4,5,8,1<br>8,21,24 | 2,6,7,17,1<br>9,20,22,23 | 8  | O89117,P01681,P02625,Q4FZU2,Q6IFW6,Q6IG02,Q6IMF3,Q6P6Q2                      |
| 3241 | 1,3,4,5,8,1<br>8,22,23 | 2,6,7,17,1<br>9,20,21,24 | 4  | P01681,P27590,P54921,Q6AY61                                                  |
| 3242 | 1,3,4,5,8,1<br>8,22,24 | 2,6,7,17,1<br>9,20,21,23 | 5  | P01681,P49134,Q4FZU2,Q6IFW6,Q6P6Q2                                           |
| 3243 | 1,3,4,5,8,1<br>8,23,24 | 2,6,7,17,1<br>9,20,21,22 | 8  | O89117,P01681,P49134,Q4FZU2,Q6IFW6,Q6IG02,Q6IMF3,Q6P6Q2                      |
| 3244 | 1,3,4,5,8,1<br>9,20,21 | 2,6,7,17,1<br>8,22,23,24 | 11 | D3ZUC6,O88797,P01681,P47967,P97840,Q4FZU2,Q5I0D1,Q6IFW6,Q6IG02,Q6IMF3,Q6P6Q2 |
| 3245 | 1,3,4,5,8,1<br>9,20,22 | 2,6,7,17,1<br>8,21,23,24 | 7  | O88797,P01681,P19218,Q6IFW6,Q6IG02,Q6IMF3,Q6P6Q2                             |
| 3246 | 1,3,4,5,8,1<br>9,20,23 | 2,6,7,17,1<br>8,21,22,24 | 8  | P01681,P10758,P23739,Q4FZU2,Q6IFW6,Q6IG02,Q6IMF3,Q6P6Q2                      |
| 3247 | 1,3,4,5,8,1<br>9,20,24 | 2,6,7,17,1<br>8,21,22,23 | 7  | O54728,P01681,Q4FZU2,Q6IFW6,Q6IG02,Q6IMF3,Q6P6Q2                             |
| 3248 | 1,3,4,5,8,1<br>9,21,22 | 2,6,7,17,1<br>8,20,23,24 | 8  | O88797,P01681,P30919,Q4FZU2,Q6IFW6,Q6IG02,Q6IMF3,Q6P6Q2                      |
| 3249 | 1,3,4,5,8,1<br>9,21,23 | 2,6,7,17,1<br>8,20,22,24 | 7  | O35077,P01681,Q4FZU2,Q6IFW6,Q6IG02,Q6IMF3,Q6P6Q2                             |
| 3250 | 1,3,4,5,8,1<br>9,21,24 | 2,6,7,17,1<br>8,20,22,23 | 9  | O54728,P01681,P30919,Q10743,Q4FZU2,Q6IFW6,Q6IG02,Q6IMF3,Q6P6Q2               |
| 3251 | 1,3,4,5,8,1<br>9,22,23 | 2,6,7,17,1<br>8,20,21,24 | 4  | P00507,P01681,P01835,P27590                                                  |
| 3252 | 1,3,4,5,8,1<br>9,22,24 | 2,6,7,17,1<br>8,20,21,23 | 11 | O54728,P00507,P01681,P01835,P30919,P55091,Q4FZU2,Q6IFW6,Q6IG02,Q6IMF3,Q6P6Q2 |
| 3253 | 1,3,4,5,8,1<br>9,23,24 | 2,6,7,17,1<br>8,20,21,22 | 9  | O54728,P01681,P01835,P25809,Q4FZU2,Q6IFW6,Q6IG02,Q6IMF3,Q6P6Q2               |
| 3254 | 1,3,4,5,8,2<br>0,21,22 | 2,6,7,17,1<br>8,19,23,24 | 10 | O88797,P00762,P01681,P20766,Q4FZU2,Q6IFU7,Q6IFW6,Q6IG02,Q6IMF3,Q6P6Q2        |
| 3255 | 1,3,4,5,8,2<br>0,21,23 | 2,6,7,17,1<br>8,19,22,24 | 10 | D3ZUC6,P00762,P01681,P23739,Q4FZU2,Q6IFU7,Q6IFW6,Q6IG02,Q6IMF3,Q6P6Q2        |
| 3256 | 1,3,4,5,8,2<br>0,21,24 | 2,6,7,17,1<br>8,19,22,23 | 10 | P00762,P01681,Q10743,Q4FZU2,Q6IFU7,Q6IFU8,Q6IFW6,Q6IG02,Q6IMF3,Q6P6Q2        |
| 3257 | 1,3,4,5,8,2<br>0,22,23 | 2,6,7,17,1<br>8,19,21,24 | 6  | P01681,P23739,Q6IFW6,Q6IG02,Q6IMF3,Q6P6Q2                                    |
| 3258 | 1,3,4,5,8,2<br>0,22,24 | 2,6,7,17,1<br>8,19,21,23 | 6  | P01681,Q4FZU2,Q6IFW6,Q6IG02,Q6IMF3,Q6P6Q2                                    |
| 3259 | 1,3,4,5,8,2<br>0,23,24 | 2,6,7,17,1<br>8,19,21,22 | 8  | P01681,P10758,P23739,Q4FZU2,Q6IFW6,Q6IG02,Q6IMF3,Q6P6Q2                      |

|      |                         |                          |    |                                                                                     |
|------|-------------------------|--------------------------|----|-------------------------------------------------------------------------------------|
| 3260 | 1,3,4,5,8,2<br>1,22,23  | 2,6,7,17,1<br>8,19,20,24 | 8  | P01681,P30919,P54921,Q4FZU2,Q6IFW6,Q6IG02,Q6IMF3,Q6P6Q2                             |
| 3261 | 1,3,4,5,8,2<br>1,22,24  | 2,6,7,17,1<br>8,19,20,23 | 9  | P00762,P01681,P30919,Q10743,Q4FZU2,Q6IFW6,Q6IG02,Q6IMF3,Q6P6Q2                      |
| 3262 | 1,3,4,5,8,2<br>1,23,24  | 2,6,7,17,1<br>8,19,20,22 | 9  | O89117,P00762,P01681,P30919,Q4FZU2,Q6IFW6,Q6IG02,Q6IMF3,Q6P6Q2                      |
| 3263 | 1,3,4,5,8,2<br>2,23,24  | 2,6,7,17,1<br>8,19,20,21 | 12 | P00507,P01681,P25809,P30919,P62804,Q00715,Q4FZU2,Q6IFW6,Q6IG02,Q6IMF3,Q6P6Q2,Q6P6R2 |
| 3264 | 1,3,4,5,17,<br>18,19,20 | 2,6,7,8,21,<br>22,23,24  | 3  | O54858,P97840,Q62714                                                                |
| 3265 | 1,3,4,5,17,<br>18,19,21 | 2,6,7,8,20,<br>22,23,24  | 1  | P97840                                                                              |
| 3266 | 1,3,4,5,17,<br>18,19,22 | 2,6,7,8,20,<br>21,23,24  | 2  | P01835,P02631                                                                       |
| 3267 | 1,3,4,5,17,<br>18,19,23 | 2,6,7,8,20,<br>21,22,24  | 2  | P01835,P02631                                                                       |
| 3268 | 1,3,4,5,17,<br>18,19,24 | 2,6,7,8,20,<br>21,22,23  | 1  | P02631                                                                              |
| 3269 | 1,3,4,5,17,<br>18,20,21 | 2,6,7,8,19,<br>22,23,24  | 4  | O54858,P97840,Q6IG02,Q811M5                                                         |
| 3270 | 1,3,4,5,17,<br>18,20,22 | 2,6,7,8,19,<br>21,23,24  | 2  | P97840,Q63474                                                                       |
| 3271 | 1,3,4,5,17,<br>18,20,23 | 2,6,7,8,19,<br>21,22,24  | 1  | P23739                                                                              |
| 3272 | 1,3,4,5,17,<br>18,20,24 | 2,6,7,8,19,<br>21,22,23  | 1  | Q6IG02                                                                              |
| 3273 | 1,3,4,5,17,<br>18,21,22 | 2,6,7,8,19,<br>20,23,24  | 0  |                                                                                     |
| 3274 | 1,3,4,5,17,<br>18,21,23 | 2,6,7,8,19,<br>20,22,24  | 0  |                                                                                     |
| 3275 | 1,3,4,5,17,<br>18,21,24 | 2,6,7,8,19,<br>20,22,23  | 0  |                                                                                     |
| 3276 | 1,3,4,5,17,<br>18,22,23 | 2,6,7,8,19,<br>20,21,24  | 9  | P02631,P08723,P09456,P30120,P62804,Q00715,Q63617,Q68G31,Q812E4                      |
| 3277 | 1,3,4,5,17,<br>18,22,24 | 2,6,7,8,19,<br>20,21,23  | 4  | P02631,P62804,Q63617,Q9WTT6                                                         |
| 3278 | 1,3,4,5,17,<br>18,23,24 | 2,6,7,8,19,<br>20,21,22  | 5  | P02631,P25809,P62804,Q63617,Q9WTT6                                                  |
| 3279 | 1,3,4,5,17,<br>19,20,21 | 2,6,7,8,18,<br>22,23,24  | 3  | O54858,P97840,Q6IG02                                                                |

|      |                                              |                                                           |
|------|----------------------------------------------|-----------------------------------------------------------|
| 3280 | 1,3,4,5,17, 2,6,7,8,18,<br>19,20,22 21,23,24 | 0                                                         |
| 3281 | 1,3,4,5,17, 2,6,7,8,18,<br>19,20,23 21,22,24 | 2 P10758,P23739                                           |
| 3282 | 1,3,4,5,17, 2,6,7,8,18,<br>19,20,24 21,22,23 | 1 Q6IG02                                                  |
| 3283 | 1,3,4,5,17, 2,6,7,8,18,<br>19,21,22 20,23,24 | 2 P01946,P02091                                           |
| 3284 | 1,3,4,5,17, 2,6,7,8,18,<br>19,21,23 20,22,24 | 2 P12020,P22006                                           |
| 3285 | 1,3,4,5,17, 2,6,7,8,18,<br>19,21,24 20,22,23 | 4 P12020,Q4FZU2,Q62761;Q62762;Q62763,Q99MH3               |
| 3286 | 1,3,4,5,17, 2,6,7,8,18,<br>19,22,23 20,21,24 | 5 P02091,P02631,P25809,P62804,Q00715                      |
| 3287 | 1,3,4,5,17, 2,6,7,8,18,<br>19,22,24 20,21,23 | 4 P02631,P25809,P62804,Q00715                             |
| 3288 | 1,3,4,5,17, 2,6,7,8,18,<br>19,23,24 20,21,22 | 5 P02631,P12020,P25809,P62804,Q00715                      |
| 3289 | 1,3,4,5,17, 2,6,7,8,18,<br>20,21,22 19,23,24 | 2 P20766,Q6IG02                                           |
| 3290 | 1,3,4,5,17, 2,6,7,8,18,<br>20,21,23 19,22,24 | 3 P20766,P23739,Q6IG02                                    |
| 3291 | 1,3,4,5,17, 2,6,7,8,18,<br>20,21,24 19,22,23 | 5 Q4FZU2,Q6IFW6,Q6IG02,Q6P6Q2,Q811M5                      |
| 3292 | 1,3,4,5,17, 2,6,7,8,18,<br>20,22,23 19,21,24 | 5 P20766,P23739,P62804,Q00715,Q68G31                      |
| 3293 | 1,3,4,5,17, 2,6,7,8,18,<br>20,22,24 19,21,23 | 4 P20766,P62804,Q00715,Q6IG02                             |
| 3294 | 1,3,4,5,17, 2,6,7,8,18,<br>20,23,24 19,21,22 | 5 P23739,P62804,Q00715,Q6IG02,Q9QYP1                      |
| 3295 | 1,3,4,5,17, 2,6,7,8,18,<br>21,22,23 19,20,24 | 3 P12020,P20766,Q68G31                                    |
| 3296 | 1,3,4,5,17, 2,6,7,8,18,<br>21,22,24 19,20,23 | 1 P20766                                                  |
| 3297 | 1,3,4,5,17, 2,6,7,8,18,<br>21,23,24 19,20,22 | 4 P12020,P50280,Q4FZU2,Q6IG02                             |
| 3298 | 1,3,4,5,17, 2,6,7,8,18,<br>22,23,24 19,20,21 | 8 P02631,P25809,P47727,P62804,Q00715,Q63617,Q68G31,Q9WTT6 |
| 3299 | 1,3,4,5,18, 2,6,7,8,17,<br>19,20,21 22,23,24 | 4 O54858,P47967,P97840,Q5I0D1                             |



|      |                                              |                                                                                 |
|------|----------------------------------------------|---------------------------------------------------------------------------------|
| 3300 | 1,3,4,5,18, 2,6,7,8,17,<br>19,20,22 21,23,24 | 2 P97840,Q63474                                                                 |
| 3301 | 1,3,4,5,18, 2,6,7,8,17,<br>19,20,23 21,22,24 | 3 P10758,P23739,P97840                                                          |
| 3302 | 1,3,4,5,18, 2,6,7,8,17,<br>19,20,24 21,22,23 | 1 P97840                                                                        |
| 3303 | 1,3,4,5,18, 2,6,7,8,17,<br>19,21,22 20,23,24 | 1 P97840                                                                        |
| 3304 | 1,3,4,5,18, 2,6,7,8,17,<br>19,21,23 20,22,24 | 3 O89117,P12020,P97840                                                          |
| 3305 | 1,3,4,5,18, 2,6,7,8,17,<br>19,21,24 20,22,23 | 1 O89117                                                                        |
| 3306 | 1,3,4,5,18, 2,6,7,8,17,<br>19,22,23 20,21,24 | 7 P02631,P09456,P25809,P30120,P47727,P62804,Q00715                              |
| 3307 | 1,3,4,5,18, 2,6,7,8,17,<br>19,22,24 20,21,23 | 6 P02631,P25809,P55091,P62804,P63029,Q9WTT6                                     |
| 3308 | 1,3,4,5,18, 2,6,7,8,17,<br>19,23,24 20,21,22 | 5 P02631,P25809,P62804,P63029,Q9WTT6                                            |
| 3309 | 1,3,4,5,18, 2,6,7,8,17,<br>20,21,22 19,23,24 | 1 P97840                                                                        |
| 3310 | 1,3,4,5,18, 2,6,7,8,17,<br>20,21,23 19,22,24 | 2 O89117,P97840                                                                 |
| 3311 | 1,3,4,5,18, 2,6,7,8,17,<br>20,21,24 19,22,23 | 3 O89117,P97840,Q6IG02                                                          |
| 3312 | 1,3,4,5,18, 2,6,7,8,17,<br>20,22,23 19,21,24 | 3 P62804,P97840,Q63474                                                          |
| 3313 | 1,3,4,5,18, 2,6,7,8,17,<br>20,22,24 19,21,23 | 3 P21674,P62804,Q9QX74                                                          |
| 3314 | 1,3,4,5,18, 2,6,7,8,17,<br>20,23,24 19,21,22 | 5 P23739,P62804,Q5QE79,Q9QX74,Q9QYP1                                            |
| 3315 | 1,3,4,5,18, 2,6,7,8,17,<br>21,22,23 19,20,24 | 6 O89117,P09456,P47727,P54921,Q68G31,Q9WTT6                                     |
| 3316 | 1,3,4,5,18, 2,6,7,8,17,<br>21,22,24 19,20,23 | 3 O89117,Q8CJD3,Q9WTT6                                                          |
| 3317 | 1,3,4,5,18, 2,6,7,8,17,<br>21,23,24 19,20,22 | 3 O89117,P12020,Q9WTT6                                                          |
| 3318 | 1,3,4,5,18, 2,6,7,8,17,<br>22,23,24 19,20,21 | 11 D4A5U3,P02631,P13676,P25809,P47727,P62804,Q00715,Q63617,Q6P6R2,Q9QX74,Q9WTT6 |
| 3319 | 1,3,4,5,19, 2,6,7,8,17,<br>20,21,22 18,23,24 | 3 P20766,P47967,P97840                                                          |

|      |                                                  |    |                                                                                                                                                                  |
|------|--------------------------------------------------|----|------------------------------------------------------------------------------------------------------------------------------------------------------------------|
| 3320 | 1,3,4,5,19, 2,6,7,8,17,<br>20,21,23 18,22,24     | 5  | P08649,P10758,P23739,P97840,Q6IG02                                                                                                                               |
| 3321 | 1,3,4,5,19, 2,6,7,8,17,<br>20,21,24 18,22,23     | 3  | P08649,P97840,Q6IG02                                                                                                                                             |
| 3322 | 1,3,4,5,19, 2,6,7,8,17,<br>20,22,23 18,21,24     | 4  | P02631,P10758,P23739,Q00715                                                                                                                                      |
| 3323 | 1,3,4,5,19, 2,6,7,8,17,<br>20,22,24 18,21,23     | 3  | P02631,P62804,Q00715                                                                                                                                             |
| 3324 | 1,3,4,5,19, 2,6,7,8,17,<br>20,23,24 18,21,22     | 5  | P02631,P10758,P23739,P62804,Q00715                                                                                                                               |
| 3325 | 1,3,4,5,19, 2,6,7,8,17,<br>21,22,23 18,20,24     | 3  | P12020,P47727,P55091                                                                                                                                             |
| 3326 | 1,3,4,5,19, 2,6,7,8,17,<br>21,22,24 18,20,23     | 4  | P12020,P25809,P30919,P55091                                                                                                                                      |
| 3327 | 1,3,4,5,19, 2,6,7,8,17,<br>21,23,24 18,20,22     | 4  | P08649,P12020,P25809,P55091                                                                                                                                      |
| 3328 | 1,3,4,5,19, 2,6,7,8,17,<br>22,23,24 18,20,21     | 11 | P00507,P02631,P12020,P25809,P47727,P55091,P62804,Q00715,Q6P6R2,Q9QX74,Q9WTT6                                                                                     |
| 3329 | 1,3,4,5,20, 2,6,7,8,17,<br>21,22,23 18,19,24     | 5  | P08649,P20766,P23739,P97840,Q6IG02                                                                                                                               |
| 3330 | 1,3,4,5,20, 2,6,7,8,17,<br>21,22,24 18,19,23     | 3  | P08649,P20766,Q6IG02                                                                                                                                             |
| 3331 | 1,3,4,5,20, 2,6,7,8,17,<br>21,23,24 18,19,22     | 4  | P08649,P23739,Q6IFW6,Q6IG02                                                                                                                                      |
| 3332 | 1,3,4,5,20, 2,6,7,8,17,<br>22,23,24 18,19,21     | 9  | P02631,P07150,P23739,P62804,Q00715,Q5QE79,Q66H69,Q6P6R2,Q9QX74                                                                                                   |
| 3333 | 1,3,4,5,21, 2,6,7,8,17,<br>22,23,24 18,19,20     | 9  | P07150,P08649,P12020,P13676,P25809,P30919,P47727,P55091,Q9WTT6                                                                                                   |
| 3334 | 1,3,4,6,7,8 2,5,19,20,<br>,17,18 21,22,23,2<br>4 | 7  | O70417,O70594,P01681,P13432,P23593,Q05702,Q63598                                                                                                                 |
| 3335 | 1,3,4,6,7,8 2,5,18,20,<br>,17,19 21,22,23,2<br>4 | 7  | O70417,O70594,P01681,P22282,Q05702,Q63493,Q99041                                                                                                                 |
| 3336 | 1,3,4,6,7,8 2,5,18,19,<br>,17,20 21,22,23,2<br>4 | 23 | D4A5U3,O70417,P02780,P06761,P06911,P11598,P12020,P13676,P19223,P19629,P22273,P22282,Q05702,Q4G075,Q5GRG2,Q5M8C6,Q62946,Q63493,Q6IG02,Q99041,Q9JHB9,Q9JI85,Q9QW07 |
| 3337 | 1,3,4,6,7,8 2,5,18,19,<br>,17,21 20,22,23,2<br>4 | 12 | O70417,O70594,P04762,P22282,Q05702,Q4FZU2,Q62946,Q63493,Q6IFW6,Q6IG02,Q99041,Q9QX74                                                                              |

|      |                       |                               |    |                                                                                                                                                                                                                                                      |
|------|-----------------------|-------------------------------|----|------------------------------------------------------------------------------------------------------------------------------------------------------------------------------------------------------------------------------------------------------|
| 3338 | 1,3,4,6,7,8<br>,17,22 | 2,5,18,19,<br>20,21,23,2<br>4 | 8  | O70417,P01681,P01946,P02091,P23593,P35280,P97580,Q99041                                                                                                                                                                                              |
| 3339 | 1,3,4,6,7,8<br>,17,23 | 2,5,18,19,<br>20,21,22,2<br>4 | 8  | O70417,O70594,P01681,P02783,P20761,P23593,Q05702,Q63598                                                                                                                                                                                              |
| 3340 | 1,3,4,6,7,8<br>,17,24 | 2,5,18,19,<br>20,21,22,2<br>3 | 9  | O70417,O70594,P01681,P23593,Q05702,Q4FZU2,Q63598,Q6IFW6,Q6IG02                                                                                                                                                                                       |
| 3341 | 1,3,4,6,7,8<br>,18,19 | 2,5,17,20,<br>21,22,23,2<br>4 | 7  | O70417,P01681,P06761,P11598,P22282,Q05702,Q99041                                                                                                                                                                                                     |
| 3342 | 1,3,4,6,7,8<br>,18,20 | 2,5,17,19,<br>21,22,23,2<br>4 | 19 | O70417,P02780,P06761,P06911,P11598,P12020,P19629,P22273,P22282,P22283,P50280,Q05702,Q4G075,Q5GRG2,Q63617,Q99041,Q9JHB9,Q9JI85,Q9QW07                                                                                                                 |
| 3343 | 1,3,4,6,7,8<br>,18,21 | 2,5,17,19,<br>20,22,23,2<br>4 | 10 | O70417,P02625,P11598,P18757,P19629,P22282,P46844,Q05702,Q63493,Q99041                                                                                                                                                                                |
| 3344 | 1,3,4,6,7,8<br>,18,22 | 2,5,17,19,<br>20,21,23,2<br>4 | 7  | O70417,P23593,P35280,P49134,P97580,Q30KJ2,Q99041                                                                                                                                                                                                     |
| 3345 | 1,3,4,6,7,8<br>,18,23 | 2,5,17,19,<br>20,21,22,2<br>4 | 9  | O70417,O70594,P02783,P20761,P46844,P49134,Q05702,Q3ZAV1,Q63598                                                                                                                                                                                       |
| 3346 | 1,3,4,6,7,8<br>,18,24 | 2,5,17,19,<br>20,21,22,2<br>3 | 9  | O70257,O70417,P02625,P23593,P46844,P49134,Q05702,Q3ZAV1,Q63598                                                                                                                                                                                       |
| 3347 | 1,3,4,6,7,8<br>,19,20 | 2,5,17,18,<br>21,22,23,2<br>4 | 35 | O70417,P00714,P02780,P06761,P06911,P08723,P0C0A9,P10758,P11598,P12020,P19629,P22273,P22282,P22283,P36374,P42854,P46462,P50280,Q05702,Q4G075,Q5GRG2,Q5I0D1,Q5M8C6,Q62902,Q62946,Q63493,Q63617,Q6IG02,Q6Q7Y5,Q812E4,Q99041,Q9JHB9,Q9JI85,Q9QW07,Q9R0T3 |
| 3348 | 1,3,4,6,7,8<br>,19,21 | 2,5,17,18,<br>20,22,23,2<br>4 | 15 | O70417,P00714,P01681,P06761,P0C0A9,P11598,P19629,P22282,P22283,Q05702,Q63493,Q63617,Q6Q7Y5,Q99041,Q9JI85                                                                                                                                             |
| 3349 | 1,3,4,6,7,8<br>,19,22 | 2,5,17,18,<br>20,21,23,2<br>4 | 9  | O70417,P01681,P15399,P19218,P22282,P35280,P97580,Q99041,Q9QZK9                                                                                                                                                                                       |
| 3350 | 1,3,4,6,7,8<br>,19,23 | 2,5,17,18,<br>20,21,22,2<br>4 | 9  | O70417,P01681,P02783,P10758,P20761,P22282,P42854,Q05702,Q99041                                                                                                                                                                                       |

|      |                        |                               |    |                                                                                                                                                                                                                                               |
|------|------------------------|-------------------------------|----|-----------------------------------------------------------------------------------------------------------------------------------------------------------------------------------------------------------------------------------------------|
| 3351 | 1,3,4,6,7,8<br>,19,24  | 2,5,17,18,<br>20,21,22,2<br>3 | 7  | O54728,O70417,P00714,P01681,P22282,Q62902,Q99041                                                                                                                                                                                              |
| 3352 | 1,3,4,6,7,8<br>,20,21  | 2,5,17,18,<br>19,22,23,2<br>4 | 34 | D4A5U3,O70417,P00714,P02631,P02780,P06761,P06911,P0C0A9,P11598,P12020,P19629,P22273,P22282,P22283,P46462,P47967,Q05702,Q4G075,Q5GRG2,Q5M8C6,Q5RKI1,Q62946,Q63493,Q63617,Q6AYR9,Q6IFW6,Q6IG02,Q6Q7Y5,Q812E4,Q99041,Q9JHB9,Q9JI85,Q9QW07,Q9ROT3 |
| 3353 | 1,3,4,6,7,8<br>,20,22  | 2,5,17,18,<br>19,21,23,2<br>4 | 18 | O70417,P02780,P06911,P11598,P12020,P15399,P19629,P22273,P22282,P23593,P35280,P50280,Q05702,Q4G075,Q5GRG2,Q99041,Q9JHB9,Q9QW07                                                                                                                 |
| 3354 | 1,3,4,6,7,8<br>,20,23  | 2,5,17,18,<br>19,21,22,2<br>4 | 20 | O70417,P02780,P02783,P06911,P09656,P10758,P11598,P12020,P19629,P20761,P22273,P22282,P42854,Q05702,Q4G075,Q5GRG2,Q62894,Q6IG02,Q99041,Q9QW07                                                                                                   |
| 3355 | 1,3,4,6,7,8<br>,20,24  | 2,5,17,18,<br>19,21,22,2<br>3 | 24 | O70417,P00714,P02780,P06761,P06911,P08723,P11598,P12020,P19629,P22273,P22282,P22283,Q05702,Q4G075,Q5GRG2,Q5M8C6,Q63617,Q6IFW6,Q6IG02,Q812E4,Q99041,Q9JHB9,Q9JI85,Q9QW07                                                                       |
| 3356 | 1,3,4,6,7,8<br>,21,22  | 2,5,17,18,<br>19,20,23,2<br>4 | 6  | O70417,P02625,P19629,P23593,P35280,Q99041                                                                                                                                                                                                     |
| 3357 | 1,3,4,6,7,8<br>,21,23  | 2,5,17,18,<br>19,20,22,2<br>4 | 9  | P02783,P09656,P19629,P20761,P46844,Q05702,Q63493,Q63532,Q99041                                                                                                                                                                                |
| 3358 | 1,3,4,6,7,8<br>,21,24  | 2,5,17,18,<br>19,20,22,2<br>3 | 16 | P00714,P02625,P02782,P04762,P11598,P22282,P30919,P36860,P46844,Q05702,Q10743,Q4FZU2,Q6AYR9,Q6IFW6,Q6IG02,Q99041                                                                                                                               |
| 3359 | 1,3,4,6,7,8<br>,22,23  | 2,5,17,18,<br>19,20,21,2<br>4 | 13 | O70417,P01681,P02783,P09656,P19629,P20761,P23593,P25809,P35280,P49134,Q09030,Q63532,Q99041                                                                                                                                                    |
| 3360 | 1,3,4,6,7,8<br>,22,24  | 2,5,17,18,<br>19,20,21,2<br>3 | 7  | O70417,P22006,P23593,P25809,P35280,P49134,Q99041                                                                                                                                                                                              |
| 3361 | 1,3,4,6,7,8<br>,23,24  | 2,5,17,18,<br>19,20,21,2<br>2 | 11 | O70417,P02783,P09656,P20761,P23593,P25809,P46844,P49134,Q05702,Q3ZAV1,Q63598                                                                                                                                                                  |
| 3362 | 1,3,4,6,7,1<br>7,18,19 | 2,5,8,20,2<br>1,22,23,24      | 0  |                                                                                                                                                                                                                                               |
| 3363 | 1,3,4,6,7,1<br>7,18,20 | 2,5,8,19,2<br>1,22,23,24      | 1  | P11598                                                                                                                                                                                                                                        |
| 3364 | 1,3,4,6,7,1<br>7,18,21 | 2,5,8,19,2<br>0,22,23,24      | 1  | P05539                                                                                                                                                                                                                                        |

|      |                        |                          |                                             |
|------|------------------------|--------------------------|---------------------------------------------|
| 3365 | 1,3,4,6,7,1<br>7,18,22 | 2,5,8,19,2<br>0,21,23,24 | 2 P01946,P02091                             |
| 3366 | 1,3,4,6,7,1<br>7,18,23 | 2,5,8,19,2<br>0,21,22,24 | 1 O70594                                    |
| 3367 | 1,3,4,6,7,1<br>7,18,24 | 2,5,8,19,2<br>0,21,22,23 | 0                                           |
| 3368 | 1,3,4,6,7,1<br>7,19,20 | 2,5,8,18,2<br>1,22,23,24 | 4 P11598,P22283,P36374,Q63617               |
| 3369 | 1,3,4,6,7,1<br>7,19,21 | 2,5,8,18,2<br>0,22,23,24 | 2 P05539,Q5QE79                             |
| 3370 | 1,3,4,6,7,1<br>7,19,22 | 2,5,8,18,2<br>0,21,23,24 | 2 P01946,P02091                             |
| 3371 | 1,3,4,6,7,1<br>7,19,23 | 2,5,8,18,2<br>0,21,22,24 | 2 P02783,P25809                             |
| 3372 | 1,3,4,6,7,1<br>7,19,24 | 2,5,8,18,2<br>0,21,22,23 | 2 P08721,P25809                             |
| 3373 | 1,3,4,6,7,1<br>7,20,21 | 2,5,8,18,1<br>9,22,23,24 | 4 P11598,P19223,P22283,Q63617               |
| 3374 | 1,3,4,6,7,1<br>7,20,22 | 2,5,8,18,1<br>9,21,23,24 | 3 O70417,P01946,P02091                      |
| 3375 | 1,3,4,6,7,1<br>7,20,23 | 2,5,8,18,1<br>9,21,22,24 | 3 P02783,P09656,P10758                      |
| 3376 | 1,3,4,6,7,1<br>7,20,24 | 2,5,8,18,1<br>9,21,22,23 | 0                                           |
| 3377 | 1,3,4,6,7,1<br>7,21,22 | 2,5,8,18,1<br>9,20,23,24 | 4 P01946,P02091,P05539,Q9R168               |
| 3378 | 1,3,4,6,7,1<br>7,21,23 | 2,5,8,18,1<br>9,20,22,24 | 2 P02783,P09656                             |
| 3379 | 1,3,4,6,7,1<br>7,21,24 | 2,5,8,18,1<br>9,20,22,23 | 3 P04762,P05539,P36860                      |
| 3380 | 1,3,4,6,7,1<br>7,22,23 | 2,5,8,18,1<br>9,20,21,24 | 5 P01946,P02091,P02783,P09656,P25809        |
| 3381 | 1,3,4,6,7,1<br>7,22,24 | 2,5,8,18,1<br>9,20,21,23 | 4 P01946,P02091,P23593,P25809               |
| 3382 | 1,3,4,6,7,1<br>7,23,24 | 2,5,8,18,1<br>9,20,21,22 | 1 P25809                                    |
| 3383 | 1,3,4,6,7,1<br>8,19,20 | 2,5,8,17,2<br>1,22,23,24 | 6 P10758,P11598,P22283,P97840,Q5I0D1,Q63617 |
| 3384 | 1,3,4,6,7,1<br>8,19,21 | 2,5,8,17,2<br>0,22,23,24 | 1 P11598                                    |

|      |                        |                          |                                                                                                      |
|------|------------------------|--------------------------|------------------------------------------------------------------------------------------------------|
| 3385 | 1,3,4,6,7,1<br>8,19,22 | 2,5,8,17,2<br>0,21,23,24 | 0                                                                                                    |
| 3386 | 1,3,4,6,7,1<br>8,19,23 | 2,5,8,17,2<br>0,21,22,24 | 2 P02783,P25809                                                                                      |
| 3387 | 1,3,4,6,7,1<br>8,19,24 | 2,5,8,17,2<br>0,21,22,23 | 1 P25809                                                                                             |
| 3388 | 1,3,4,6,7,1<br>8,20,21 | 2,5,8,17,1<br>9,22,23,24 | 5 P11598,P22283,P47967,P97840,Q63617                                                                 |
| 3389 | 1,3,4,6,7,1<br>8,20,22 | 2,5,8,17,1<br>9,21,23,24 | 0                                                                                                    |
| 3390 | 1,3,4,6,7,1<br>8,20,23 | 2,5,8,17,1<br>9,21,22,24 | 4 P02783,P09656,P10758,P11598                                                                        |
| 3391 | 1,3,4,6,7,1<br>8,20,24 | 2,5,8,17,1<br>9,21,22,23 | 1 P11598                                                                                             |
| 3392 | 1,3,4,6,7,1<br>8,21,22 | 2,5,8,17,1<br>9,20,23,24 | 2 P23739,Q8CJD3                                                                                      |
| 3393 | 1,3,4,6,7,1<br>8,21,23 | 2,5,8,17,1<br>9,20,22,24 | 3 O89117,P02783,P09656                                                                               |
| 3394 | 1,3,4,6,7,1<br>8,21,24 | 2,5,8,17,1<br>9,20,22,23 | 2 O89117,Q8CJD3                                                                                      |
| 3395 | 1,3,4,6,7,1<br>8,22,23 | 2,5,8,17,1<br>9,20,21,24 | 5 P02783,P06760,P09656,P25809,P54921                                                                 |
| 3396 | 1,3,4,6,7,1<br>8,22,24 | 2,5,8,17,1<br>9,20,21,23 | 5 P06760,P22006,P25809,Q6P6R2,Q8CJD3                                                                 |
| 3397 | 1,3,4,6,7,1<br>8,23,24 | 2,5,8,17,1<br>9,20,21,22 | 3 P06760,P25809,Q6P6R2                                                                               |
| 3398 | 1,3,4,6,7,1<br>9,20,21 | 2,5,8,17,1<br>8,22,23,24 | 14 P00714,P02780,P05369,P10758,P11598,P22283,P36374,P47967,P97840,Q5I0D1,Q63493,Q63617,Q9JI85,Q9R0T3 |
| 3399 | 1,3,4,6,7,1<br>9,20,22 | 2,5,8,17,1<br>8,21,23,24 | 3 P11598,Q63617,Q99041                                                                               |
| 3400 | 1,3,4,6,7,1<br>9,20,23 | 2,5,8,17,1<br>8,21,22,24 | 5 P02783,P09656,P10758,P11598,Q63617                                                                 |
| 3401 | 1,3,4,6,7,1<br>9,20,24 | 2,5,8,17,1<br>8,21,22,23 | 7 P08723,P10758,P11598,P22283,P36374,Q63617,Q9QW07                                                   |
| 3402 | 1,3,4,6,7,1<br>9,21,22 | 2,5,8,17,1<br>8,20,23,24 | 2 P01946,Q99041                                                                                      |
| 3403 | 1,3,4,6,7,1<br>9,21,23 | 2,5,8,17,1<br>8,20,22,24 | 2 P02783,P09656                                                                                      |
| 3404 | 1,3,4,6,7,1<br>9,21,24 | 2,5,8,17,1<br>8,20,22,23 | 3 P00714,P25809,Q62761;Q62762;Q62763                                                                 |

|      |                        |                          |   |                                                         |
|------|------------------------|--------------------------|---|---------------------------------------------------------|
| 3405 | 1,3,4,6,7,1<br>9,22,23 | 2,5,8,17,1<br>8,20,21,24 | 2 | P02783,P25809                                           |
| 3406 | 1,3,4,6,7,1<br>9,22,24 | 2,5,8,17,1<br>8,20,21,23 | 3 | P19132,P22006,P25809                                    |
| 3407 | 1,3,4,6,7,1<br>9,23,24 | 2,5,8,17,1<br>8,20,21,22 | 2 | P02783,P25809                                           |
| 3408 | 1,3,4,6,7,2<br>0,21,22 | 2,5,8,17,1<br>8,19,23,24 | 2 | P11598,Q63617                                           |
| 3409 | 1,3,4,6,7,2<br>0,21,23 | 2,5,8,17,1<br>8,19,22,24 | 6 | P02783,P09656,P10758,P11598,P19629,Q63617               |
| 3410 | 1,3,4,6,7,2<br>0,21,24 | 2,5,8,17,1<br>8,19,22,23 | 4 | P00714,P11598,P22283,Q63617                             |
| 3411 | 1,3,4,6,7,2<br>0,22,23 | 2,5,8,17,1<br>8,19,21,24 | 3 | P02783,P09656,P10758                                    |
| 3412 | 1,3,4,6,7,2<br>0,22,24 | 2,5,8,17,1<br>8,19,21,23 | 1 | P22006                                                  |
| 3413 | 1,3,4,6,7,2<br>0,23,24 | 2,5,8,17,1<br>8,19,21,22 | 4 | P02783,P09656,P10758,Q9QYP1                             |
| 3414 | 1,3,4,6,7,2<br>1,22,23 | 2,5,8,17,1<br>8,19,20,24 | 3 | P02783,P09656,P25809                                    |
| 3415 | 1,3,4,6,7,2<br>1,22,24 | 2,5,8,17,1<br>8,19,20,23 | 2 | P25809,P30919                                           |
| 3416 | 1,3,4,6,7,2<br>1,23,24 | 2,5,8,17,1<br>8,19,20,22 | 4 | P02783,P09656,P25809,P36860                             |
| 3417 | 1,3,4,6,7,2<br>2,23,24 | 2,5,8,17,1<br>8,19,20,21 | 7 | P02783,P06760,P09656,P22006,P25809,P62804,Q6P6R2        |
| 3418 | 1,3,4,6,8,1<br>7,18,19 | 2,5,7,20,2<br>1,22,23,24 | 6 | O70417,P01681,P01835,P08649,P13432,Q06000               |
| 3419 | 1,3,4,6,8,1<br>7,18,20 | 2,5,7,19,2<br>1,22,23,24 | 8 | O70417,P06911,P12020,P13432,Q05702,Q5GRG2,Q6IG02,Q9R168 |
| 3420 | 1,3,4,6,8,1<br>7,18,21 | 2,5,7,19,2<br>0,22,23,24 | 1 | P02625                                                  |
| 3421 | 1,3,4,6,8,1<br>7,18,22 | 2,5,7,19,2<br>0,21,23,24 | 8 | O70417,P01946,P02091,P08649,P13432,P23593,P97580,Q30KJ2 |
| 3422 | 1,3,4,6,8,1<br>7,18,23 | 2,5,7,19,2<br>0,21,22,24 | 2 | O70594,Q05702                                           |
| 3423 | 1,3,4,6,8,1<br>7,18,24 | 2,5,7,19,2<br>0,21,22,23 | 2 | O70417,P13432                                           |
| 3424 | 1,3,4,6,8,1<br>7,19,20 | 2,5,7,18,2<br>1,22,23,24 | 7 | O70417,P01681,P06911,P36374,Q5GRG2,Q6IG02,Q9JI85        |

|      |                        |                          |    |                                                                              |
|------|------------------------|--------------------------|----|------------------------------------------------------------------------------|
| 3425 | 1,3,4,6,8,1<br>7,19,21 | 2,5,7,18,2<br>0,22,23,24 | 2  | P01681,Q9JI85                                                                |
| 3426 | 1,3,4,6,8,1<br>7,19,22 | 2,5,7,18,2<br>0,21,23,24 | 6  | O70417,P01681,P01946,P02091,P15399,P97580                                    |
| 3427 | 1,3,4,6,8,1<br>7,19,23 | 2,5,7,18,2<br>0,21,22,24 | 2  | P01681,P02783                                                                |
| 3428 | 1,3,4,6,8,1<br>7,19,24 | 2,5,7,18,2<br>0,21,22,23 | 3  | O54728,O70417,P01681                                                         |
| 3429 | 1,3,4,6,8,1<br>7,20,21 | 2,5,7,18,1<br>9,22,23,24 | 11 | D4A5U3,O70417,P00762,P06911,P19223,Q05702,Q10758,Q5GRG2,Q6IFW6,Q6IG02,Q9JI85 |
| 3430 | 1,3,4,6,8,1<br>7,20,22 | 2,5,7,18,1<br>9,21,23,24 | 7  | O70417,P01946,P02091,P06911,P15399,Q5GRG2,Q6IG02                             |
| 3431 | 1,3,4,6,8,1<br>7,20,23 | 2,5,7,18,1<br>9,21,22,24 | 6  | O70417,P02783,P06911,P09656,Q05702,Q6IG02                                    |
| 3432 | 1,3,4,6,8,1<br>7,20,24 | 2,5,7,18,1<br>9,21,22,23 | 6  | O70417,P06911,Q05702,Q5GRG2,Q6IFW6,Q6IG02                                    |
| 3433 | 1,3,4,6,8,1<br>7,21,22 | 2,5,7,18,1<br>9,20,23,24 | 2  | P01946,P02091                                                                |
| 3434 | 1,3,4,6,8,1<br>7,21,23 | 2,5,7,18,1<br>9,20,22,24 | 3  | P02783,P09656,Q05702                                                         |
| 3435 | 1,3,4,6,8,1<br>7,21,24 | 2,5,7,18,1<br>9,20,22,23 | 4  | Q10743,Q4FZU2,Q6IFW6,Q6IG02                                                  |
| 3436 | 1,3,4,6,8,1<br>7,22,23 | 2,5,7,18,1<br>9,20,21,24 | 7  | O70417,P01681,P01946,P02091,P02783,P09656,P23593                             |
| 3437 | 1,3,4,6,8,1<br>7,22,24 | 2,5,7,18,1<br>9,20,21,23 | 4  | O70417,P01946,P02091,P23593                                                  |
| 3438 | 1,3,4,6,8,1<br>7,23,24 | 2,5,7,18,1<br>9,20,21,22 | 0  |                                                                              |
| 3439 | 1,3,4,6,8,1<br>8,19,20 | 2,5,7,17,2<br>1,22,23,24 | 6  | O70417,P06911,P22282,Q9JI85,Q9QW07,Q9R168                                    |
| 3440 | 1,3,4,6,8,1<br>8,19,21 | 2,5,7,17,2<br>0,22,23,24 | 1  | Q9JI85                                                                       |
| 3441 | 1,3,4,6,8,1<br>8,19,22 | 2,5,7,17,2<br>0,21,23,24 | 4  | P15399,P97580,Q30KJ2,Q6AY61                                                  |
| 3442 | 1,3,4,6,8,1<br>8,19,23 | 2,5,7,17,2<br>0,21,22,24 | 2  | P01681,P02783                                                                |
| 3443 | 1,3,4,6,8,1<br>8,19,24 | 2,5,7,17,2<br>0,21,22,23 | 1  | O54728                                                                       |
| 3444 | 1,3,4,6,8,1<br>8,20,21 | 2,5,7,17,1<br>9,22,23,24 | 9  | P00762,P02625,P06911,P19629,P54921,Q05702,Q6IG02,Q9JI85,Q9R168               |



|      |                        |                          |    |                                                                                     |
|------|------------------------|--------------------------|----|-------------------------------------------------------------------------------------|
| 3445 | 1,3,4,6,8,1<br>8,20,22 | 2,5,7,17,1<br>9,21,23,24 | 7  | O70417,P06911,P12020,P15399,P54921,Q6AY61,Q9R168                                    |
| 3446 | 1,3,4,6,8,1<br>8,20,23 | 2,5,7,17,1<br>9,21,22,24 | 7  | P02783,P06911,P09656,P10758,P54921,Q05702,Q9R168                                    |
| 3447 | 1,3,4,6,8,1<br>8,20,24 | 2,5,7,17,1<br>9,21,22,23 | 6  | O70417,P06911,Q05702,Q6IG02,Q9QW07,Q9R168                                           |
| 3448 | 1,3,4,6,8,1<br>8,21,22 | 2,5,7,17,1<br>9,20,23,24 | 2  | P02625,P54921                                                                       |
| 3449 | 1,3,4,6,8,1<br>8,21,23 | 2,5,7,17,1<br>9,20,22,24 | 4  | P02783,P09656,P54921,Q05702                                                         |
| 3450 | 1,3,4,6,8,1<br>8,21,24 | 2,5,7,17,1<br>9,20,22,23 | 2  | P02625,Q10743                                                                       |
| 3451 | 1,3,4,6,8,1<br>8,22,23 | 2,5,7,17,1<br>9,20,21,24 | 5  | P02783,P09656,P54921,Q63532,Q6AY61                                                  |
| 3452 | 1,3,4,6,8,1<br>8,22,24 | 2,5,7,17,1<br>9,20,21,23 | 3  | P22006,P23593,Q8CJD3                                                                |
| 3453 | 1,3,4,6,8,1<br>8,23,24 | 2,5,7,17,1<br>9,20,21,22 | 0  |                                                                                     |
| 3454 | 1,3,4,6,8,1<br>9,20,21 | 2,5,7,17,1<br>8,22,23,24 | 12 | P02780,P05369,P19629,P22282,P22283,P36374,Q10743,Q63493,Q6IG02,Q6Q7Y5,Q9JI85,Q9QW07 |
| 3455 | 1,3,4,6,8,1<br>9,20,22 | 2,5,7,17,1<br>8,21,23,24 | 5  | O70417,P06911,P15399,P19218,Q9JI85                                                  |
| 3456 | 1,3,4,6,8,1<br>9,20,23 | 2,5,7,17,1<br>8,21,22,24 | 4  | P02783,P09656,P10758,P42854                                                         |
| 3457 | 1,3,4,6,8,1<br>9,20,24 | 2,5,7,17,1<br>8,21,22,23 | 9  | O54728,P06911,P08723,P22282,P36374,Q10743,Q6IG02,Q9JI85,Q9QW07                      |
| 3458 | 1,3,4,6,8,1<br>9,21,22 | 2,5,7,17,1<br>8,20,23,24 | 4  | P01946,P02091,P15399,P30919                                                         |
| 3459 | 1,3,4,6,8,1<br>9,21,23 | 2,5,7,17,1<br>8,20,22,24 | 3  | P02783,P09656,Q9Z0J6                                                                |
| 3460 | 1,3,4,6,8,1<br>9,21,24 | 2,5,7,17,1<br>8,20,22,23 | 6  | O54728,P30919,Q10743,Q6IFW6,Q6Q7Y5,Q9JI85                                           |
| 3461 | 1,3,4,6,8,1<br>9,22,23 | 2,5,7,17,1<br>8,20,21,24 | 8  | P00507,P01681,P01946,P02091,P02783,P15399,P25809,Q6AY61                             |
| 3462 | 1,3,4,6,8,1<br>9,22,24 | 2,5,7,17,1<br>8,20,21,23 | 6  | O54728,P00507,P15399,P22006,P25809,P30919                                           |
| 3463 | 1,3,4,6,8,1<br>9,23,24 | 2,5,7,17,1<br>8,20,21,22 | 5  | O54728,P01681,P02783,P25809,Q9Z0J6                                                  |
| 3464 | 1,3,4,6,8,2<br>0,21,22 | 2,5,7,17,1<br>8,19,23,24 | 6  | P00762,P15399,P19629,P54921,Q10743,Q6IG02                                           |

|      |                         |                          |    |                                                                              |
|------|-------------------------|--------------------------|----|------------------------------------------------------------------------------|
| 3465 | 1,3,4,6,8,2<br>0,21,23  | 2,5,7,17,1<br>8,19,22,24 | 8  | P00762,P02783,P09656,P10758,P19629,P54921,Q05702,Q6IG02                      |
| 3466 | 1,3,4,6,8,2<br>0,21,24  | 2,5,7,17,1<br>8,19,22,23 | 9  | P00762,P08723,Q05702,Q10743,Q6AYR9,Q6IFW6,Q6IG02,Q9JI85,Q9QW07               |
| 3467 | 1,3,4,6,8,2<br>0,22,23  | 2,5,7,17,1<br>8,19,21,24 | 5  | P02783,P09656,P15399,P54921,Q6AY61                                           |
| 3468 | 1,3,4,6,8,2<br>0,22,24  | 2,5,7,17,1<br>8,19,21,23 | 7  | O70417,P06911,P15399,P22006,Q10743,Q6IG02,Q9QW07                             |
| 3469 | 1,3,4,6,8,2<br>0,23,24  | 2,5,7,17,1<br>8,19,21,22 | 6  | P02783,P09656,P10758,Q05702,Q6IG02,Q9QYP1                                    |
| 3470 | 1,3,4,6,8,2<br>1,22,23  | 2,5,7,17,1<br>8,19,20,24 | 5  | P02783,P09656,P30919,P54921,Q63532                                           |
| 3471 | 1,3,4,6,8,2<br>1,22,24  | 2,5,7,17,1<br>8,19,20,23 | 4  | P02625,P30919,Q10743,Q6IFW6                                                  |
| 3472 | 1,3,4,6,8,2<br>1,23,24  | 2,5,7,17,1<br>8,19,20,22 | 6  | P00762,P02783,P09656,P30919,Q05702,Q6IFW6                                    |
| 3473 | 1,3,4,6,8,2<br>2,23,24  | 2,5,7,17,1<br>8,19,20,21 | 11 | P00507,P02783,P06760,P09656,P22006,P23593,P25809,P30919,P62804,Q63532,Q6P6R2 |
| 3474 | 1,3,4,6,17,<br>18,19,20 | 2,5,7,8,21,<br>22,23,24  | 3  | Q06000,Q62714,Q8K1G0                                                         |
| 3475 | 1,3,4,6,17,<br>18,19,21 | 2,5,7,8,20,<br>22,23,24  | 0  |                                                                              |
| 3476 | 1,3,4,6,17,<br>18,19,22 | 2,5,7,8,20,<br>21,23,24  | 3  | P01946,P02091,Q06000                                                         |
| 3477 | 1,3,4,6,17,<br>18,19,23 | 2,5,7,8,20,<br>21,22,24  | 0  |                                                                              |
| 3478 | 1,3,4,6,17,<br>18,19,24 | 2,5,7,8,20,<br>21,22,23  | 2  | P70549,Q06000                                                                |
| 3479 | 1,3,4,6,17,<br>18,20,21 | 2,5,7,8,19,<br>22,23,24  | 0  |                                                                              |
| 3480 | 1,3,4,6,17,<br>18,20,22 | 2,5,7,8,19,<br>21,23,24  | 3  | P01946,P02091,Q06000                                                         |
| 3481 | 1,3,4,6,17,<br>18,20,23 | 2,5,7,8,19,<br>21,22,24  | 0  |                                                                              |
| 3482 | 1,3,4,6,17,<br>18,20,24 | 2,5,7,8,19,<br>21,22,23  | 0  |                                                                              |
| 3483 | 1,3,4,6,17,<br>18,21,22 | 2,5,7,8,19,<br>20,23,24  | 4  | P01946,P02091,P23739,Q8CJD3                                                  |
| 3484 | 1,3,4,6,17,<br>18,21,23 | 2,5,7,8,19,<br>20,22,24  | 1  | P09656                                                                       |

|      |                                              |                                                           |
|------|----------------------------------------------|-----------------------------------------------------------|
| 3485 | 1,3,4,6,17, 2,5,7,8,19,<br>18,21,24 20,22,23 | 2 Q4G075,Q8CJD3                                           |
| 3486 | 1,3,4,6,17, 2,5,7,8,19,<br>18,22,23 20,21,24 | 7 P01946,P02091,P02783,P06760,P55159,P62804,Q9WTT6        |
| 3487 | 1,3,4,6,17, 2,5,7,8,19,<br>18,22,24 20,21,23 | 7 P01946,P02091,P06760,P22006,P62804,Q8CJD3,Q9WTT6        |
| 3488 | 1,3,4,6,17, 2,5,7,8,19,<br>18,23,24 20,21,22 | 4 P06760,P25809,P62804,Q9WTT6                             |
| 3489 | 1,3,4,6,17, 2,5,7,8,18,<br>19,20,21 22,23,24 | 1 P36374                                                  |
| 3490 | 1,3,4,6,17, 2,5,7,8,18,<br>19,20,22 21,23,24 | 4 O89117,P01946,P02091,Q9JJ50                             |
| 3491 | 1,3,4,6,17, 2,5,7,8,18,<br>19,20,23 21,22,24 | 2 P02783,P10758                                           |
| 3492 | 1,3,4,6,17, 2,5,7,8,18,<br>19,20,24 21,22,23 | 1 P36374                                                  |
| 3493 | 1,3,4,6,17, 2,5,7,8,18,<br>19,21,22 20,23,24 | 2 P01946,P02091                                           |
| 3494 | 1,3,4,6,17, 2,5,7,8,18,<br>19,21,23 20,22,24 | 1 P02783                                                  |
| 3495 | 1,3,4,6,17, 2,5,7,8,18,<br>19,21,24 20,22,23 | 0                                                         |
| 3496 | 1,3,4,6,17, 2,5,7,8,18,<br>19,22,23 20,21,24 | 7 P01946,P02091,P02783,P06760,P25809,P62804,Q00715        |
| 3497 | 1,3,4,6,17, 2,5,7,8,18,<br>19,22,24 20,21,23 | 8 P01946,P02091,P06760,P19132,P25809,P62804,P70549,Q00715 |
| 3498 | 1,3,4,6,17, 2,5,7,8,18,<br>19,23,24 20,21,22 | 5 P06760,P25809,P62804,P70549,Q00715                      |
| 3499 | 1,3,4,6,17, 2,5,7,8,18,<br>20,21,22 19,23,24 | 3 P01946,P02091,P20766                                    |
| 3500 | 1,3,4,6,17, 2,5,7,8,18,<br>20,21,23 19,22,24 | 2 P02783,P09656                                           |
| 3501 | 1,3,4,6,17, 2,5,7,8,18,<br>20,21,24 19,22,23 | 0                                                         |
| 3502 | 1,3,4,6,17, 2,5,7,8,18,<br>20,22,23 19,21,24 | 7 P01946,P02091,P02783,P06760,P09656,P62804,Q00715        |
| 3503 | 1,3,4,6,17, 2,5,7,8,18,<br>20,22,24 19,21,23 | 6 P01946,P02091,P06760,P22006,P62804,Q00715               |
| 3504 | 1,3,4,6,17, 2,5,7,8,18,<br>20,23,24 19,21,22 | 5 P06760,P09656,P62804,Q00715,Q9QYP1                      |

|      |                                              |                                                                                                   |
|------|----------------------------------------------|---------------------------------------------------------------------------------------------------|
| 3505 | 1,3,4,6,17, 2,5,7,8,18,<br>21,22,23 19,20,24 | 4 P01946,P02091,P02783,P09656                                                                     |
| 3506 | 1,3,4,6,17, 2,5,7,8,18,<br>21,22,24 19,20,23 | 2 P01946,P02091                                                                                   |
| 3507 | 1,3,4,6,17, 2,5,7,8,18,<br>21,23,24 19,20,22 | 2 P09656,P25809                                                                                   |
| 3508 | 1,3,4,6,17, 2,5,7,8,18,<br>22,23,24 19,20,21 | 13 P01946,P02091,P02783,P06760,P07335,P09656,P25809,P47967,P55159,P62804,Q00715,Q5I0D<br>1,Q9WTT6 |
| 3509 | 1,3,4,6,18, 2,5,7,8,17,<br>19,20,21 22,23,24 | 0                                                                                                 |
| 3510 | 1,3,4,6,18, 2,5,7,8,17,<br>19,20,22 21,23,24 | 1 P39069                                                                                          |
| 3511 | 1,3,4,6,18, 2,5,7,8,17,<br>19,20,23 21,22,24 | 2 P02783,P10758                                                                                   |
| 3512 | 1,3,4,6,18, 2,5,7,8,17,<br>19,20,24 21,22,23 | 0                                                                                                 |
| 3513 | 1,3,4,6,18, 2,5,7,8,17,<br>19,21,22 20,23,24 | 1 P01946                                                                                          |
| 3514 | 1,3,4,6,18, 2,5,7,8,17,<br>19,21,23 20,22,24 | 1 P02783                                                                                          |
| 3515 | 1,3,4,6,18, 2,5,7,8,17,<br>19,21,24 20,22,23 | 1 Q4G075                                                                                          |
| 3516 | 1,3,4,6,18, 2,5,7,8,17,<br>19,22,23 20,21,24 | 8 P02783,P06760,P13676,P25809,P62804,Q6AY61,Q811M5,Q9WTT6                                         |
| 3517 | 1,3,4,6,18, 2,5,7,8,17,<br>19,22,24 20,21,23 | 7 P06760,P13676,P19132,P22006,P25809,P62804,Q9WTT6                                                |
| 3518 | 1,3,4,6,18, 2,5,7,8,17,<br>19,23,24 20,21,22 | 4 P06760,P25809,P62804,Q9WTT6                                                                     |
| 3519 | 1,3,4,6,18, 2,5,7,8,17,<br>20,21,22 19,23,24 | 3 P54921,Q5PQL7,Q8CJD3                                                                            |
| 3520 | 1,3,4,6,18, 2,5,7,8,17,<br>20,21,23 19,22,24 | 3 P02783,P09656,P54921                                                                            |
| 3521 | 1,3,4,6,18, 2,5,7,8,17,<br>20,21,24 19,22,23 | 1 Q8CJD3                                                                                          |
| 3522 | 1,3,4,6,18, 2,5,7,8,17,<br>20,22,23 19,21,24 | 9 P02783,P04355,P06760,P09656,P34080,P54921,P62804,Q6AY61,Q9QX74                                  |
| 3523 | 1,3,4,6,18, 2,5,7,8,17,<br>20,22,24 19,21,23 | 5 P06760,P22006,P62804,Q8CJD3,Q9QX74                                                              |
| 3524 | 1,3,4,6,18, 2,5,7,8,17,<br>20,23,24 19,21,22 | 5 P06760,P09656,P62804,Q9QX74,Q9QYP1                                                              |

|      |                                              |    |                                                                                                              |
|------|----------------------------------------------|----|--------------------------------------------------------------------------------------------------------------|
| 3525 | 1,3,4,6,18, 2,5,7,8,17,<br>21,22,23 19,20,24 | 5  | P02783,P09656,P13676,P54921,Q9WTT6                                                                           |
| 3526 | 1,3,4,6,18, 2,5,7,8,17,<br>21,22,24 19,20,23 | 4  | P13676,Q4G075,Q8CJD3,Q9WTT6                                                                                  |
| 3527 | 1,3,4,6,18, 2,5,7,8,17,<br>21,23,24 19,20,22 | 5  | O89117,P09656,P13676,Q4G075,Q9WTT6                                                                           |
| 3528 | 1,3,4,6,18, 2,5,7,8,17,<br>22,23,24 19,20,21 | 15 | D4A5U3,P02783,P06760,P09656,P13676,P22006,P25809,P55159,P62804,Q00715,Q6P6R2,Q811<br>M5,Q8CJD3,Q9QX74,Q9WTT6 |
| 3529 | 1,3,4,6,19, 2,5,7,8,17,<br>20,21,22 18,23,24 | 2  | P01946,Q5PQL7                                                                                                |
| 3530 | 1,3,4,6,19, 2,5,7,8,17,<br>20,21,23 18,22,24 | 3  | P02783,P09656,P10758                                                                                         |
| 3531 | 1,3,4,6,19, 2,5,7,8,17,<br>20,21,24 18,22,23 | 2  | O35547,P36374                                                                                                |
| 3532 | 1,3,4,6,19, 2,5,7,8,17,<br>20,22,23 18,21,24 | 6  | P02783,P06760,P09656,P10758,Q00715,Q9QX74                                                                    |
| 3533 | 1,3,4,6,19, 2,5,7,8,17,<br>20,22,24 18,21,23 | 6  | P06760,P22006,P62804,Q00715,Q9QX74,Q9Z0V6                                                                    |
| 3534 | 1,3,4,6,19, 2,5,7,8,17,<br>20,23,24 18,21,22 | 8  | P02783,P06760,P09656,P10758,P62804,Q00715,Q9QX74,Q9QYP1                                                      |
| 3535 | 1,3,4,6,19, 2,5,7,8,17,<br>21,22,23 18,20,24 | 6  | P01946,P02091,P02783,P09656,P25809,Q811M5                                                                    |
| 3536 | 1,3,4,6,19, 2,5,7,8,17,<br>21,22,24 18,20,23 | 5  | P01946,P02091,P19132,P25809,P30919                                                                           |
| 3537 | 1,3,4,6,19, 2,5,7,8,17,<br>21,23,24 18,20,22 | 3  | P02783,P09656,P25809                                                                                         |
| 3538 | 1,3,4,6,19, 2,5,7,8,17,<br>22,23,24 18,20,21 | 14 | P00507,P01946,P02091,P02783,P06760,P13676,P22006,P25809,P62804,P70549,Q00715,Q811<br>M5,Q9QX74,Q9WTT6        |
| 3539 | 1,3,4,6,20, 2,5,7,8,17,<br>21,22,23 18,19,24 | 4  | P02783,P09656,P20766,P54921                                                                                  |
| 3540 | 1,3,4,6,20, 2,5,7,8,17,<br>21,22,24 18,19,23 | 1  | P22006                                                                                                       |
| 3541 | 1,3,4,6,20, 2,5,7,8,17,<br>21,23,24 18,19,22 | 3  | P02783,P09656,Q9QYP1                                                                                         |
| 3542 | 1,3,4,6,20, 2,5,7,8,17,<br>22,23,24 18,19,21 | 10 | P02783,P06760,P09656,P22006,P62804,Q00715,Q66H69,Q6P6R2,Q9QX74,Q9QYP1                                        |
| 3543 | 1,3,4,6,21, 2,5,7,8,17,<br>22,23,24 18,19,20 | 9  | P01946,P02783,P06760,P09656,P13676,P25809,P30919,Q9QX74,Q9WTT6                                               |
| 3544 | 1,3,4,7,8,1 2,5,6,20,2<br>7,18,19 1,22,23,24 | 5  | O70417,P01681,P01835,P20646,Q9QX74                                                                           |

|      |                        |                          |    |                                                                                                                                      |
|------|------------------------|--------------------------|----|--------------------------------------------------------------------------------------------------------------------------------------|
| 3545 | 1,3,4,7,8,1<br>7,18,20 | 2,5,6,19,2<br>1,22,23,24 | 6  | O70417,P06911,P13676,Q4G075,Q6IG02,Q811M5                                                                                            |
| 3546 | 1,3,4,7,8,1<br>7,18,21 | 2,5,6,19,2<br>0,22,23,24 | 5  | O70417,P01681,Q6IFW6,Q811M5,Q9QX74                                                                                                   |
| 3547 | 1,3,4,7,8,1<br>7,18,22 | 2,5,6,19,2<br>0,21,23,24 | 3  | O70417,P01681,P35280                                                                                                                 |
| 3548 | 1,3,4,7,8,1<br>7,18,23 | 2,5,6,19,2<br>0,21,22,24 | 4  | O70417,O70594,P01681,Q5IOJ9                                                                                                          |
| 3549 | 1,3,4,7,8,1<br>7,18,24 | 2,5,6,19,2<br>0,21,22,23 | 3  | O70417,P01681,Q811M5                                                                                                                 |
| 3550 | 1,3,4,7,8,1<br>7,19,20 | 2,5,6,18,2<br>1,22,23,24 | 16 | D4A5U3,O70417,P01681,P02780,P06911,P10758,P13676,P20646,P22282,P36374,Q4G075,Q62946,Q63493,Q6IG02,Q811M5,Q9WTT6                      |
| 3551 | 1,3,4,7,8,1<br>7,19,21 | 2,5,6,18,2<br>0,22,23,24 | 12 | B0BNN3,O70417,P01681,P04355,P20646,Q5QE79,Q63493,Q66H69,Q6IFW6,Q811M5,Q9EQS0,Q9QX74                                                  |
| 3552 | 1,3,4,7,8,1<br>7,19,22 | 2,5,6,18,2<br>0,21,23,24 | 4  | O70417,P01681,P20646,P35280                                                                                                          |
| 3553 | 1,3,4,7,8,1<br>7,19,23 | 2,5,6,18,2<br>0,21,22,24 | 4  | O70417,P01681,P20646,P21674                                                                                                          |
| 3554 | 1,3,4,7,8,1<br>7,19,24 | 2,5,6,18,2<br>0,21,22,23 | 5  | O54728,O70417,P01681,Q4FZU2,Q6IFW6                                                                                                   |
| 3555 | 1,3,4,7,8,1<br>7,20,21 | 2,5,6,18,1<br>9,22,23,24 | 19 | D4A5U3,O70417,P00762,P02780,P06911,P13676,P19223,P20646,Q4FZU2,Q5M8C6,Q62946,Q63493,Q6IFW6,Q6IG02,Q6P6Q2,Q811M5,Q9EQS0,Q9QX74,Q9WTT6 |
| 3556 | 1,3,4,7,8,1<br>7,20,22 | 2,5,6,18,1<br>9,21,23,24 | 7  | O70417,P01681,P06911,P35280,Q4G075,Q6IG02,Q9JJ50                                                                                     |
| 3557 | 1,3,4,7,8,1<br>7,20,23 | 2,5,6,18,1<br>9,21,22,24 | 6  | O70417,P01681,P06911,P10758,Q4G075,Q6IG02                                                                                            |
| 3558 | 1,3,4,7,8,1<br>7,20,24 | 2,5,6,18,1<br>9,21,22,23 | 9  | O70417,P06911,P08723,Q4FZU2,Q6IFW6,Q6IG02,Q6P6Q2,Q811M5,Q9JHB9                                                                       |
| 3559 | 1,3,4,7,8,1<br>7,21,22 | 2,5,6,18,1<br>9,20,23,24 | 4  | O70417,P01681,P35280,Q6IFW6                                                                                                          |
| 3560 | 1,3,4,7,8,1<br>7,21,23 | 2,5,6,18,1<br>9,20,22,24 | 4  | P01681,Q4FZU2,Q6IFW6,Q6IG02                                                                                                          |
| 3561 | 1,3,4,7,8,1<br>7,21,24 | 2,5,6,18,1<br>9,20,22,23 | 7  | P01681,P02782,Q4FZU2,Q6IFW6,Q6IG02,Q811M5,Q9EQS0                                                                                     |
| 3562 | 1,3,4,7,8,1<br>7,22,23 | 2,5,6,18,1<br>9,20,21,24 | 4  | O70417,P01681,P35280,Q68G31                                                                                                          |
| 3563 | 1,3,4,7,8,1<br>7,22,24 | 2,5,6,18,1<br>9,20,21,23 | 5  | O70417,P01681,P23593,P35280,Q6IFW6                                                                                                   |
| 3564 | 1,3,4,7,8,1<br>7,23,24 | 2,5,6,18,1<br>9,20,21,22 | 6  | O70417,P01681,Q4FZU2,Q5PQL7,Q63598,Q6IFW6                                                                                            |

|      |                        |                          |    |                                                                                                                                                                                              |
|------|------------------------|--------------------------|----|----------------------------------------------------------------------------------------------------------------------------------------------------------------------------------------------|
| 3565 | 1,3,4,7,8,1<br>8,19,20 | 2,5,6,17,2<br>1,22,23,24 | 11 | O70417,P01039,P01681,P02780,P10758,P22282,P36374,P47967,P97840,Q5I0D1,Q9R168                                                                                                                 |
| 3566 | 1,3,4,7,8,1<br>8,19,21 | 2,5,6,17,2<br>0,22,23,24 | 5  | P01039,P01681,P97840,Q63751,Q66H69                                                                                                                                                           |
| 3567 | 1,3,4,7,8,1<br>8,19,22 | 2,5,6,17,2<br>0,21,23,24 | 4  | O70417,P01039,P01681,P35280                                                                                                                                                                  |
| 3568 | 1,3,4,7,8,1<br>8,19,23 | 2,5,6,17,2<br>0,21,22,24 | 4  | P01039,P01681,P10758,Q5I0J9                                                                                                                                                                  |
| 3569 | 1,3,4,7,8,1<br>8,19,24 | 2,5,6,17,2<br>0,21,22,23 | 3  | O54728,P01681,P63029                                                                                                                                                                         |
| 3570 | 1,3,4,7,8,1<br>8,20,21 | 2,5,6,17,1<br>9,22,23,24 | 9  | P00762,P01039,P02780,P47967,P97840,Q63493,Q6IFW6,Q6IG02,Q811M5                                                                                                                               |
| 3571 | 1,3,4,7,8,1<br>8,20,22 | 2,5,6,17,1<br>9,21,23,24 | 5  | O70417,P01039,P35280,P97840,Q4G075                                                                                                                                                           |
| 3572 | 1,3,4,7,8,1<br>8,20,23 | 2,5,6,17,1<br>9,21,22,24 | 4  | O70417,P01039,P10758,Q9R168                                                                                                                                                                  |
| 3573 | 1,3,4,7,8,1<br>8,20,24 | 2,5,6,17,1<br>9,21,22,23 | 5  | O70417,Q6IFW6,Q6IG02,Q811M5,Q9JHB9                                                                                                                                                           |
| 3574 | 1,3,4,7,8,1<br>8,21,22 | 2,5,6,17,1<br>9,20,23,24 | 3  | P01039,P02625,P35280                                                                                                                                                                         |
| 3575 | 1,3,4,7,8,1<br>8,21,23 | 2,5,6,17,1<br>9,20,22,24 | 2  | O89117,P01039                                                                                                                                                                                |
| 3576 | 1,3,4,7,8,1<br>8,21,24 | 2,5,6,17,1<br>9,20,22,23 | 3  | O89117,P02625,Q6IFW6                                                                                                                                                                         |
| 3577 | 1,3,4,7,8,1<br>8,22,23 | 2,5,6,17,1<br>9,20,21,24 | 6  | P01039,P01681,P35280,P49134,Q5I0J9,Q6AY61                                                                                                                                                    |
| 3578 | 1,3,4,7,8,1<br>8,22,24 | 2,5,6,17,1<br>9,20,21,23 | 4  | O70417,P35280,P49134,Q8CJD3                                                                                                                                                                  |
| 3579 | 1,3,4,7,8,1<br>8,23,24 | 2,5,6,17,1<br>9,20,21,22 | 4  | P49134,Q3ZAV1,Q5I0J9,Q64268                                                                                                                                                                  |
| 3580 | 1,3,4,7,8,1<br>9,20,21 | 2,5,6,17,1<br>8,22,23,24 | 27 | B0BNN3,D4A5U3,P00762,P01039,P02780,P04905,P08723,P0C0A9,P10758,P16636,P22282,P22283,P24368,P36374,P47967,P97840,Q5I0D1,Q5M8C6,Q5RKI1,Q63493,Q63617,Q6IFW6,Q6IG02,Q6Q7Y5,Q812E4,Q9EQS0,Q9WTT6 |
| 3581 | 1,3,4,7,8,1<br>9,20,22 | 2,5,6,17,1<br>8,21,23,24 | 7  | O70417,P01039,P01681,P02780,P10758,P35280,Q4G075                                                                                                                                             |
| 3582 | 1,3,4,7,8,1<br>9,20,23 | 2,5,6,17,1<br>8,21,22,24 | 6  | O70417,P01039,P01681,P10758,Q4G075,Q812E4                                                                                                                                                    |
| 3583 | 1,3,4,7,8,1<br>9,20,24 | 2,5,6,17,1<br>8,21,22,23 | 13 | O54728,O70417,P01681,P02780,P08723,P10758,P16636,P22282,P36374,Q6IFW6,Q6IG02,Q812E4,Q9QW07                                                                                                   |
| 3584 | 1,3,4,7,8,1<br>9,21,22 | 2,5,6,17,1<br>8,20,23,24 | 4  | B0BNN3,P01039,P01681,P35280                                                                                                                                                                  |

|      |                         |                          |    |                                                                                                          |
|------|-------------------------|--------------------------|----|----------------------------------------------------------------------------------------------------------|
| 3585 | 1,3,4,7,8,1<br>9,21,23  | 2,5,6,17,1<br>8,20,22,24 | 3  | O35077,P01039,P01681                                                                                     |
| 3586 | 1,3,4,7,8,1<br>9,21,24  | 2,5,6,17,1<br>8,20,22,23 | 8  | B0BNN3,O54728,P01681,P02782,P04355,P16636,Q6IFW6,Q6Q7Y5                                                  |
| 3587 | 1,3,4,7,8,1<br>9,22,23  | 2,5,6,17,1<br>8,20,21,24 | 3  | P01039,P01681,P35280                                                                                     |
| 3588 | 1,3,4,7,8,1<br>9,22,24  | 2,5,6,17,1<br>8,20,21,23 | 4  | O54728,O70417,P01681,P35280                                                                              |
| 3589 | 1,3,4,7,8,1<br>9,23,24  | 2,5,6,17,1<br>8,20,21,22 | 4  | O54728,P01681,P10758,P25809                                                                              |
| 3590 | 1,3,4,7,8,2<br>0,21,22  | 2,5,6,17,1<br>8,19,23,24 | 7  | O70417,P00762,P01039,P02780,P35280,Q6IFW6,Q6IG02                                                         |
| 3591 | 1,3,4,7,8,2<br>0,21,23  | 2,5,6,17,1<br>8,19,22,24 | 7  | P00762,P01039,P10758,Q63493,Q6IFW6,Q6IG02,Q812E4                                                         |
| 3592 | 1,3,4,7,8,2<br>0,21,24  | 2,5,6,17,1<br>8,19,22,23 | 15 | P00762,P02780,P02781,P02782,P08723,Q4FZU2,Q5M8C6,Q6AYR9,Q6IFW6,Q6IG02,Q6P6Q2,Q811M5,Q812E4,Q9EQS0,Q9JHB9 |
| 3593 | 1,3,4,7,8,2<br>0,22,23  | 2,5,6,17,1<br>8,19,21,24 | 5  | O70417,P01039,P10758,P35280,Q4G075                                                                       |
| 3594 | 1,3,4,7,8,2<br>0,22,24  | 2,5,6,17,1<br>8,19,21,23 | 5  | O70417,P00762,P35280,Q6IFW6,Q6IG02                                                                       |
| 3595 | 1,3,4,7,8,2<br>0,23,24  | 2,5,6,17,1<br>8,19,21,22 | 6  | P00762,P10758,Q6IFW6,Q6IG02,Q812E4,Q9QYP1                                                                |
| 3596 | 1,3,4,7,8,2<br>1,22,23  | 2,5,6,17,1<br>8,19,20,24 | 3  | P01039,P02783,P35280                                                                                     |
| 3597 | 1,3,4,7,8,2<br>1,22,24  | 2,5,6,17,1<br>8,19,20,23 | 3  | P00762,P35280,Q6IFW6                                                                                     |
| 3598 | 1,3,4,7,8,2<br>1,23,24  | 2,5,6,17,1<br>8,19,20,22 | 3  | P00762,Q6IFW6,Q6IG02                                                                                     |
| 3599 | 1,3,4,7,8,2<br>2,23,24  | 2,5,6,17,1<br>8,19,20,21 | 4  | P01681,P20761,P25809,P35280                                                                              |
| 3600 | 1,3,4,7,17,<br>18,19,20 | 2,5,6,8,21,<br>22,23,24  | 6  | O54858,P20646,P30919,P97840,Q62714,Q8K1G0                                                                |
| 3601 | 1,3,4,7,17,<br>18,19,21 | 2,5,6,8,20,<br>22,23,24  | 2  | P20646,P97840                                                                                            |
| 3602 | 1,3,4,7,17,<br>18,19,22 | 2,5,6,8,20,<br>21,23,24  | 0  |                                                                                                          |
| 3603 | 1,3,4,7,17,<br>18,19,23 | 2,5,6,8,20,<br>21,22,24  | 0  |                                                                                                          |
| 3604 | 1,3,4,7,17,<br>18,19,24 | 2,5,6,8,20,<br>21,22,23  | 0  |                                                                                                          |



|      |                                              |                                                    |
|------|----------------------------------------------|----------------------------------------------------|
| 3605 | 1,3,4,7,17, 2,5,6,8,19,<br>18,20,21 22,23,24 | 4 O54858,P00507,P97840,Q811M5                      |
| 3606 | 1,3,4,7,17, 2,5,6,8,19,<br>18,20,22 21,23,24 | 1 P97840                                           |
| 3607 | 1,3,4,7,17, 2,5,6,8,19,<br>18,20,23 21,22,24 | 2 P10758,P30919                                    |
| 3608 | 1,3,4,7,17, 2,5,6,8,19,<br>18,20,24 21,22,23 | 2 Q811M5,Q9QYP1                                    |
| 3609 | 1,3,4,7,17, 2,5,6,8,19,<br>18,21,22 20,23,24 | 1 Q8CJD3                                           |
| 3610 | 1,3,4,7,17, 2,5,6,8,19,<br>18,21,23 20,22,24 | 0                                                  |
| 3611 | 1,3,4,7,17, 2,5,6,8,19,<br>18,21,24 20,22,23 | 1 Q8CJD3                                           |
| 3612 | 1,3,4,7,17, 2,5,6,8,19,<br>18,22,23 20,21,24 | 2 Q5I0J9,Q68G31                                    |
| 3613 | 1,3,4,7,17, 2,5,6,8,19,<br>18,22,24 20,21,23 | 1 Q8CJD3                                           |
| 3614 | 1,3,4,7,17, 2,5,6,8,19,<br>18,23,24 20,21,22 | 2 Q5I0J9,Q64268                                    |
| 3615 | 1,3,4,7,17, 2,5,6,8,18,<br>19,20,21 22,23,24 | 7 O54858,P16636,P20646,P36374,P97840,Q6P6R2,Q811M5 |
| 3616 | 1,3,4,7,17, 2,5,6,8,18,<br>19,20,22 21,23,24 | 2 P20646,Q9JJ50                                    |
| 3617 | 1,3,4,7,17, 2,5,6,8,18,<br>19,20,23 21,22,24 | 1 P10758                                           |
| 3618 | 1,3,4,7,17, 2,5,6,8,18,<br>19,20,24 21,22,23 | 4 P16636,P36374,P54921,Q99MH3                      |
| 3619 | 1,3,4,7,17, 2,5,6,8,18,<br>19,21,22 20,23,24 | 2 B0BNN3,Q9R168                                    |
| 3620 | 1,3,4,7,17, 2,5,6,8,18,<br>19,21,23 20,22,24 | 0                                                  |
| 3621 | 1,3,4,7,17, 2,5,6,8,18,<br>19,21,24 20,22,23 | 4 P16636,P54921,Q62761;Q62762;Q62763,Q99MH3        |
| 3622 | 1,3,4,7,17, 2,5,6,8,18,<br>19,22,23 20,21,24 | 1 P25809                                           |
| 3623 | 1,3,4,7,17, 2,5,6,8,18,<br>19,22,24 20,21,23 | 1 P25809                                           |
| 3624 | 1,3,4,7,17, 2,5,6,8,18,<br>19,23,24 20,21,22 | 1 P25809                                           |

|      |                                              |                                             |
|------|----------------------------------------------|---------------------------------------------|
| 3625 | 1,3,4,7,17, 2,5,6,8,18,<br>20,21,22 19,23,24 | 0                                           |
| 3626 | 1,3,4,7,17, 2,5,6,8,18,<br>20,21,23 19,22,24 | 1 P10758                                    |
| 3627 | 1,3,4,7,17, 2,5,6,8,18,<br>20,21,24 19,22,23 | 1 Q811M5                                    |
| 3628 | 1,3,4,7,17, 2,5,6,8,18,<br>20,22,23 19,21,24 | 2 P10758,Q68G31                             |
| 3629 | 1,3,4,7,17, 2,5,6,8,18,<br>20,22,24 19,21,23 | 0                                           |
| 3630 | 1,3,4,7,17, 2,5,6,8,18,<br>20,23,24 19,21,22 | 2 P10758,Q9QYP1                             |
| 3631 | 1,3,4,7,17, 2,5,6,8,18,<br>21,22,23 19,20,24 | 2 Q68G31,Q9R168                             |
| 3632 | 1,3,4,7,17, 2,5,6,8,18,<br>21,22,24 19,20,23 | 1 Q9R168                                    |
| 3633 | 1,3,4,7,17, 2,5,6,8,18,<br>21,23,24 19,20,22 | 0                                           |
| 3634 | 1,3,4,7,17, 2,5,6,8,18,<br>22,23,24 19,20,21 | 4 P25809,Q00715,Q64268,Q68G31               |
| 3635 | 1,3,4,7,18, 2,5,6,8,17,<br>19,20,21 22,23,24 | 6 O54858,P01039,P47967,P97840,Q5I0D1,Q63617 |
| 3636 | 1,3,4,7,18, 2,5,6,8,17,<br>19,20,22 21,23,24 | 2 P01039,P97840                             |
| 3637 | 1,3,4,7,18, 2,5,6,8,17,<br>19,20,23 21,22,24 | 3 P01039,P10758,P97840                      |
| 3638 | 1,3,4,7,18, 2,5,6,8,17,<br>19,20,24 21,22,23 | 2 P10758,P97840                             |
| 3639 | 1,3,4,7,18, 2,5,6,8,17,<br>19,21,22 20,23,24 | 2 P01039,P97840                             |
| 3640 | 1,3,4,7,18, 2,5,6,8,17,<br>19,21,23 20,22,24 | 3 O89117,P01039,P97840                      |
| 3641 | 1,3,4,7,18, 2,5,6,8,17,<br>19,21,24 20,22,23 | 5 O89117,P17559,P36376,P63029,P97840        |
| 3642 | 1,3,4,7,18, 2,5,6,8,17,<br>19,22,23 20,21,24 | 3 P01039,P36375,Q5I0J9                      |
| 3643 | 1,3,4,7,18, 2,5,6,8,17,<br>19,22,24 20,21,23 | 5 P17559,P19132,P25809,P36375,P63029        |
| 3644 | 1,3,4,7,18, 2,5,6,8,17,<br>19,23,24 20,21,22 | 4 P25809,P63029,Q5I0J9,Q6AYQ8               |

|      |                                              |                                                           |
|------|----------------------------------------------|-----------------------------------------------------------|
| 3645 | 1,3,4,7,18, 2,5,6,8,17,<br>20,21,22 19,23,24 | 3 P01039,P97840,Q8CJD3                                    |
| 3646 | 1,3,4,7,18, 2,5,6,8,17,<br>20,21,23 19,22,24 | 3 P01039,P10758,P97840                                    |
| 3647 | 1,3,4,7,18, 2,5,6,8,17,<br>20,21,24 19,22,23 | 2 P97840,Q8CJD3                                           |
| 3648 | 1,3,4,7,18, 2,5,6,8,17,<br>20,22,23 19,21,24 | 3 P01039,P10758,P97840                                    |
| 3649 | 1,3,4,7,18, 2,5,6,8,17,<br>20,22,24 19,21,23 | 2 P97840,Q8CJD3                                           |
| 3650 | 1,3,4,7,18, 2,5,6,8,17,<br>20,23,24 19,21,22 | 2 P10758,Q9QYP1                                           |
| 3651 | 1,3,4,7,18, 2,5,6,8,17,<br>21,22,23 19,20,24 | 2 P01039,Q68G31                                           |
| 3652 | 1,3,4,7,18, 2,5,6,8,17,<br>21,22,24 19,20,23 | 2 O89117,Q8CJD3                                           |
| 3653 | 1,3,4,7,18, 2,5,6,8,17,<br>21,23,24 19,20,22 | 2 O89117,Q64268                                           |
| 3654 | 1,3,4,7,18, 2,5,6,8,17,<br>22,23,24 19,20,21 | 8 P06760,P08934,P25809,Q5I0J9,Q64268,Q6AYQ8,Q6P6R2,Q8CJD3 |
| 3655 | 1,3,4,7,19, 2,5,6,8,17,<br>20,21,22 18,23,24 | 5 B0BNN3,P01039,P16636,P47967,P97840                      |
| 3656 | 1,3,4,7,19, 2,5,6,8,17,<br>20,21,23 18,22,24 | 3 P01039,P10758,P97840                                    |
| 3657 | 1,3,4,7,19, 2,5,6,8,17,<br>20,21,24 18,22,23 | 5 P16636,P36374,P97840,Q63617,Q99MH3                      |
| 3658 | 1,3,4,7,19, 2,5,6,8,17,<br>20,22,23 18,21,24 | 3 P01039,P10758,P97840                                    |
| 3659 | 1,3,4,7,19, 2,5,6,8,17,<br>20,22,24 18,21,23 | 1 P16636                                                  |
| 3660 | 1,3,4,7,19, 2,5,6,8,17,<br>20,23,24 18,21,22 | 2 P10758,Q9QYP1                                           |
| 3661 | 1,3,4,7,19, 2,5,6,8,17,<br>21,22,23 18,20,24 | 1 P01039                                                  |
| 3662 | 1,3,4,7,19, 2,5,6,8,17,<br>21,22,24 18,20,23 | 4 B0BNN3,P16636,P17559,P55091                             |
| 3663 | 1,3,4,7,19, 2,5,6,8,17,<br>21,23,24 18,20,22 | 3 P08649,P25809,Q62761;Q62762;Q62763                      |
| 3664 | 1,3,4,7,19, 2,5,6,8,17,<br>22,23,24 18,20,21 | 4 P25809,P36375,P55091,Q00715                             |

|      |                                              |                                      |
|------|----------------------------------------------|--------------------------------------|
| 3665 | 1,3,4,7,20, 2,5,6,8,17,<br>21,22,23 18,19,24 | 4 P01039,P08649,P10758,P97840        |
| 3666 | 1,3,4,7,20, 2,5,6,8,17,<br>21,22,24 18,19,23 | 1 P08649                             |
| 3667 | 1,3,4,7,20, 2,5,6,8,17,<br>21,23,24 18,19,22 | 3 P08649,P10758,Q9QYP1               |
| 3668 | 1,3,4,7,20, 2,5,6,8,17,<br>22,23,24 18,19,21 | 3 P10758,Q00715,Q9QYP1               |
| 3669 | 1,3,4,7,21, 2,5,6,8,17,<br>22,23,24 18,19,20 | 2 P08649,P25809                      |
| 3670 | 1,3,4,8,17, 2,5,6,7,21,<br>18,19,20 22,23,24 | 5 O70417,P01681,P01835,Q62714,Q9R168 |
| 3671 | 1,3,4,8,17, 2,5,6,7,20,<br>18,19,21 22,23,24 | 2 P01681,P01835                      |
| 3672 | 1,3,4,8,17, 2,5,6,7,20,<br>18,19,22 21,23,24 | 2 P01681,P01835                      |
| 3673 | 1,3,4,8,17, 2,5,6,7,20,<br>18,19,23 21,22,24 | 2 P01681,P01835                      |
| 3674 | 1,3,4,8,17, 2,5,6,7,20,<br>18,19,24 21,22,23 | 3 O54728,P01681,P01835               |
| 3675 | 1,3,4,8,17, 2,5,6,7,19,<br>18,20,21 22,23,24 | 4 P00762,Q10758,Q6IG02,Q811M5        |
| 3676 | 1,3,4,8,17, 2,5,6,7,19,<br>18,20,22 21,23,24 | 1 O70417                             |
| 3677 | 1,3,4,8,17, 2,5,6,7,19,<br>18,20,23 21,22,24 | 1 Q9R168                             |
| 3678 | 1,3,4,8,17, 2,5,6,7,19,<br>18,20,24 21,22,23 | 4 O70417,P00762,Q6IG02,Q811M5        |
| 3679 | 1,3,4,8,17, 2,5,6,7,19,<br>18,21,22 20,23,24 | 0                                    |
| 3680 | 1,3,4,8,17, 2,5,6,7,19,<br>18,21,23 20,22,24 | 0                                    |
| 3681 | 1,3,4,8,17, 2,5,6,7,19,<br>18,21,24 20,22,23 | 3 P00762,P02625,Q6IFW6               |
| 3682 | 1,3,4,8,17, 2,5,6,7,19,<br>18,22,23 20,21,24 | 2 P01681,Q6AY61                      |
| 3683 | 1,3,4,8,17, 2,5,6,7,19,<br>18,22,24 20,21,23 | 1 P50116                             |
| 3684 | 1,3,4,8,17, 2,5,6,7,19,<br>18,23,24 20,21,22 | 1 P01681                             |

|      |                                              |                                                                          |
|------|----------------------------------------------|--------------------------------------------------------------------------|
| 3685 | 1,3,4,8,17, 2,5,6,7,18,<br>19,20,21 22,23,24 | 10 BOLT89,P00762,P13676,P16636,P36374,Q6IFW6,Q6IG02,Q6P6R2,Q811M5,Q9EQS0 |
| 3686 | 1,3,4,8,17, 2,5,6,7,18,<br>19,20,22 21,23,24 | 5 O70417,O89117,P01681,P01835,Q9JJ50                                     |
| 3687 | 1,3,4,8,17, 2,5,6,7,18,<br>19,20,23 21,22,24 | 4 P01681,P01835,P10758,Q6IG02                                            |
| 3688 | 1,3,4,8,17, 2,5,6,7,18,<br>19,20,24 21,22,23 | 8 O54728,P00762,P01681,P01835,P16636,P36374,P60905,Q6IG02                |
| 3689 | 1,3,4,8,17, 2,5,6,7,18,<br>19,21,22 20,23,24 | 3 B0BNN3,P01681,P02091                                                   |
| 3690 | 1,3,4,8,17, 2,5,6,7,18,<br>19,21,23 20,22,24 | 1 P01681                                                                 |
| 3691 | 1,3,4,8,17, 2,5,6,7,18,<br>19,21,24 20,22,23 | 9 B0BNN3,O54728,P00762,P01681,P16636,Q4FZU2,Q6IFW6,Q6IG02,Q9EQS0         |
| 3692 | 1,3,4,8,17, 2,5,6,7,18,<br>19,22,23 20,21,24 | 3 P01681,P01835,P02091                                                   |
| 3693 | 1,3,4,8,17, 2,5,6,7,18,<br>19,22,24 20,21,23 | 3 O54728,P01681,P01835                                                   |
| 3694 | 1,3,4,8,17, 2,5,6,7,18,<br>19,23,24 20,21,22 | 3 O54728,P01681,P01835                                                   |
| 3695 | 1,3,4,8,17, 2,5,6,7,18,<br>20,21,22 19,23,24 | 5 P00762,P20766,Q6IFW6,Q6IG02,Q9JJ50                                     |
| 3696 | 1,3,4,8,17, 2,5,6,7,18,<br>20,21,23 19,22,24 | 3 P00762,Q6IFW6,Q6IG02                                                   |
| 3697 | 1,3,4,8,17, 2,5,6,7,18,<br>20,21,24 19,22,23 | 8 P00762,P30120,Q4FZU2,Q6IFW6,Q6IG02,Q6P6Q2,Q811M5,Q9EQS0                |
| 3698 | 1,3,4,8,17, 2,5,6,7,18,<br>20,22,23 19,21,24 | 1 P00762                                                                 |
| 3699 | 1,3,4,8,17, 2,5,6,7,18,<br>20,22,24 19,21,23 | 5 O70417,P00762,Q6IFW6,Q6IG02,Q9JJ50                                     |
| 3700 | 1,3,4,8,17, 2,5,6,7,18,<br>20,23,24 19,21,22 | 4 P00762,Q6IFW6,Q6IG02,Q9QYP1                                            |
| 3701 | 1,3,4,8,17, 2,5,6,7,18,<br>21,22,23 19,20,24 | 2 P00762,P01681                                                          |
| 3702 | 1,3,4,8,17, 2,5,6,7,18,<br>21,22,24 19,20,23 | 2 P00762,Q6IFW6                                                          |
| 3703 | 1,3,4,8,17, 2,5,6,7,18,<br>21,23,24 19,20,22 | 4 P00762,Q4FZU2,Q6IFW6,Q6IG02                                            |
| 3704 | 1,3,4,8,17, 2,5,6,7,18,<br>22,23,24 19,20,21 | 4 P01681,P47967,P62804,Q00715                                            |

|      |                                              |                                      |
|------|----------------------------------------------|--------------------------------------|
| 3705 | 1,3,4,8,18, 2,5,6,7,17,<br>19,20,21 22,23,24 | 3 P00762,P01039,Q9R168               |
| 3706 | 1,3,4,8,18, 2,5,6,7,17,<br>19,20,22 21,23,24 | 5 P01039,P36860,P50116,Q6AY61,Q9R168 |
| 3707 | 1,3,4,8,18, 2,5,6,7,17,<br>19,20,23 21,22,24 | 4 P01039,P10758,P36860,Q9R168        |
| 3708 | 1,3,4,8,18, 2,5,6,7,17,<br>19,20,24 21,22,23 | 4 O54728,P00762,P50116,Q9R168        |
| 3709 | 1,3,4,8,18, 2,5,6,7,17,<br>19,21,22 20,23,24 | 1 P01039                             |
| 3710 | 1,3,4,8,18, 2,5,6,7,17,<br>19,21,23 20,22,24 | 3 P01039,P01681,Q9Z0J6               |
| 3711 | 1,3,4,8,18, 2,5,6,7,17,<br>19,21,24 20,22,23 | 2 O54728,P00762                      |
| 3712 | 1,3,4,8,18, 2,5,6,7,17,<br>19,22,23 20,21,24 | 4 P01039,P01681,P50116,Q6AY61        |
| 3713 | 1,3,4,8,18, 2,5,6,7,17,<br>19,22,24 20,21,23 | 2 O54728,P50116                      |
| 3714 | 1,3,4,8,18, 2,5,6,7,17,<br>19,23,24 20,21,22 | 4 O54728,P01681,P50116,Q9Z0J6        |
| 3715 | 1,3,4,8,18, 2,5,6,7,17,<br>20,21,22 19,23,24 | 3 P00762,P01039,P54921               |
| 3716 | 1,3,4,8,18, 2,5,6,7,17,<br>20,21,23 19,22,24 | 5 P00762,P01039,P54921,Q6IG02,Q9R168 |
| 3717 | 1,3,4,8,18, 2,5,6,7,17,<br>20,21,24 19,22,23 | 3 P00762,Q6IFW6,Q6IG02               |
| 3718 | 1,3,4,8,18, 2,5,6,7,17,<br>20,22,23 19,21,24 | 5 P01039,P50116,P54921,Q6AY61,Q9R168 |
| 3719 | 1,3,4,8,18, 2,5,6,7,17,<br>20,22,24 19,21,23 | 2 P00762,P50116                      |
| 3720 | 1,3,4,8,18, 2,5,6,7,17,<br>20,23,24 19,21,22 | 5 P00762,P10758,P50116,Q9QYP1,Q9R168 |
| 3721 | 1,3,4,8,18, 2,5,6,7,17,<br>21,22,23 19,20,24 | 5 P00762,P01039,P50116,P54921,Q6AY61 |
| 3722 | 1,3,4,8,18, 2,5,6,7,17,<br>21,22,24 19,20,23 | 4 P00762,P02625,P50116,Q8CJD3        |
| 3723 | 1,3,4,8,18, 2,5,6,7,17,<br>21,23,24 19,20,22 | 4 O89117,P00762,P50116,Q9Z0J6        |
| 3724 | 1,3,4,8,18, 2,5,6,7,17,<br>22,23,24 19,20,21 | 2 P50116,P62804                      |

|      |                                              |    |                                                                                                   |
|------|----------------------------------------------|----|---------------------------------------------------------------------------------------------------|
| 3725 | 1,3,4,8,19, 2,5,6,7,17,<br>20,21,22 18,23,24 | 4  | B0BNN3,P00762,P01039,P16636                                                                       |
| 3726 | 1,3,4,8,19, 2,5,6,7,17,<br>20,21,23 18,22,24 | 4  | P00762,P01039,P10758,Q6IG02                                                                       |
| 3727 | 1,3,4,8,19, 2,5,6,7,17,<br>20,21,24 18,22,23 | 14 | B0BNN3,O35547,O54728,P00762,P08723,P16636,P30120,P36374,P60905,Q64335,Q6IFW6,Q6IG02,Q812E4,Q9EQS0 |
| 3728 | 1,3,4,8,19, 2,5,6,7,17,<br>20,22,23 18,21,24 | 5  | P01039,P01681,P10758,P36860,Q6AY61                                                                |
| 3729 | 1,3,4,8,19, 2,5,6,7,17,<br>20,22,24 18,21,23 | 5  | O54728,P00762,P16636,P50116,Q9JJ50                                                                |
| 3730 | 1,3,4,8,19, 2,5,6,7,17,<br>20,23,24 18,21,22 | 4  | O54728,P00762,P10758,Q6IG02                                                                       |
| 3731 | 1,3,4,8,19, 2,5,6,7,17,<br>21,22,23 18,20,24 | 3  | P01039,P01681,Q9Z0J6                                                                              |
| 3732 | 1,3,4,8,19, 2,5,6,7,17,<br>21,22,24 18,20,23 | 8  | B0BNN3,O54728,P00762,P16636,P30919,P50116,P55091,Q64335                                           |
| 3733 | 1,3,4,8,19, 2,5,6,7,17,<br>21,23,24 18,20,22 | 5  | O54728,P00762,Q64335,Q6IFW6,Q9Z0J6                                                                |
| 3734 | 1,3,4,8,19, 2,5,6,7,17,<br>22,23,24 18,20,21 | 8  | O54728,P00507,P01681,P25809,P50116,P55091,Q00715,Q9Z0J6                                           |
| 3735 | 1,3,4,8,20, 2,5,6,7,17,<br>21,22,23 18,19,24 | 4  | P00762,P01039,P54921,Q6IG02                                                                       |
| 3736 | 1,3,4,8,20, 2,5,6,7,17,<br>21,22,24 18,19,23 | 4  | P00762,Q10743,Q6IFW6,Q6IG02                                                                       |
| 3737 | 1,3,4,8,20, 2,5,6,7,17,<br>21,23,24 18,19,22 | 3  | P00762,Q6IFW6,Q6IG02                                                                              |
| 3738 | 1,3,4,8,20, 2,5,6,7,17,<br>22,23,24 18,19,21 | 3  | P00762,P50116,Q00715                                                                              |
| 3739 | 1,3,4,8,21, 2,5,6,7,17,<br>22,23,24 18,19,20 | 4  | P00762,P30919,P50116,Q6IFW6                                                                       |
| 3740 | 1,3,4,17,1 2,5,6,7,8,2<br>8,19,20,21 2,23,24 | 3  | O54858,Q62714,Q6P6R2                                                                              |
| 3741 | 1,3,4,17,1 2,5,6,7,8,2<br>8,19,20,22 1,23,24 | 7  | O54858,P36860,P50115,P50116,Q62714,Q63474,Q9JJ50                                                  |
| 3742 | 1,3,4,17,1 2,5,6,7,8,2<br>8,19,20,23 1,22,24 | 3  | O54858,P10758,Q62714                                                                              |
| 3743 | 1,3,4,17,1 2,5,6,7,8,2<br>8,19,20,24 1,22,23 | 5  | O54858,P50115,P50116,Q62714,Q63532                                                                |
| 3744 | 1,3,4,17,1 2,5,6,7,8,2<br>8,19,21,22 0,23,24 | 1  | P50116                                                                                            |

|      |                                              |                                                                                        |
|------|----------------------------------------------|----------------------------------------------------------------------------------------|
| 3745 | 1,3,4,17,1 2,5,6,7,8,2<br>8,19,21,23 0,22,24 | 1 O54858                                                                               |
| 3746 | 1,3,4,17,1 2,5,6,7,8,2<br>8,19,21,24 0,22,23 | 4 O54858,P50116,Q4G075,Q99MH3                                                          |
| 3747 | 1,3,4,17,1 2,5,6,7,8,2<br>8,19,22,23 0,21,24 | 3 P02631,P50116,Q00715                                                                 |
| 3748 | 1,3,4,17,1 2,5,6,7,8,2<br>8,19,22,24 0,21,23 | 7 P02631,P06760,P19132,P50115,P50116,P70549,Q00715                                     |
| 3749 | 1,3,4,17,1 2,5,6,7,8,2<br>8,19,23,24 0,21,22 | 5 P02631,P06760,P50116,P70549,Q00715                                                   |
| 3750 | 1,3,4,17,1 2,5,6,7,8,1<br>8,20,21,22 9,23,24 | 2 O54858,P50115                                                                        |
| 3751 | 1,3,4,17,1 2,5,6,7,8,1<br>8,20,21,23 9,22,24 | 2 O54858,P50115                                                                        |
| 3752 | 1,3,4,17,1 2,5,6,7,8,1<br>8,20,21,24 9,22,23 | 4 O54858,P50115,Q811M5,Q8CJD3                                                          |
| 3753 | 1,3,4,17,1 2,5,6,7,8,1<br>8,20,22,23 9,21,24 | 3 P50115,P50116,Q00715                                                                 |
| 3754 | 1,3,4,17,1 2,5,6,7,8,1<br>8,20,22,24 9,21,23 | 3 P50115,P50116,Q8CJD3                                                                 |
| 3755 | 1,3,4,17,1 2,5,6,7,8,1<br>8,20,23,24 9,21,22 | 3 P50115,P50116,Q9QYP1                                                                 |
| 3756 | 1,3,4,17,1 2,5,6,7,8,1<br>8,21,22,23 9,20,24 | 2 P50115,P50116                                                                        |
| 3757 | 1,3,4,17,1 2,5,6,7,8,1<br>8,21,22,24 9,20,23 | 5 P25031,P50115,P50116,Q4G075,Q8CJD3                                                   |
| 3758 | 1,3,4,17,1 2,5,6,7,8,1<br>8,21,23,24 9,20,22 | 4 P19218,P50115,P50116,Q4G075                                                          |
| 3759 | 1,3,4,17,1 2,5,6,7,8,1<br>8,22,23,24 9,20,21 | 12 P02631,P06760,P25809,P50115,P50116,P55159,P62804,Q00715,Q5I0D1,Q63617,Q64268,Q9WTT6 |
| 3760 | 1,3,4,17,1 2,5,6,7,8,1<br>9,20,21,22 8,23,24 | 4 O54858,P16636,P20766,Q9JJ50                                                          |
| 3761 | 1,3,4,17,1 2,5,6,7,8,1<br>9,20,21,23 8,22,24 | 2 O54858,P10758                                                                        |
| 3762 | 1,3,4,17,1 2,5,6,7,8,1<br>9,20,21,24 8,22,23 | 4 O54858,P16636,P36374,Q99MH3                                                          |
| 3763 | 1,3,4,17,1 2,5,6,7,8,1<br>9,20,22,23 8,21,24 | 5 P10758,P36860,P50116,Q00715,Q9JJ50                                                   |
| 3764 | 1,3,4,17,1 2,5,6,7,8,1<br>9,20,22,24 8,21,23 | 5 P16636,P50115,P50116,Q00715,Q9JJ50                                                   |



|      |                                              |                                                                                                      |
|------|----------------------------------------------|------------------------------------------------------------------------------------------------------|
| 3765 | 1,3,4,17,1 2,5,6,7,8,1<br>9,20,23,24 8,21,22 | 5 O54858,P10758,P50116,Q00715,Q9QYP1                                                                 |
| 3766 | 1,3,4,17,1 2,5,6,7,8,1<br>9,21,22,23 8,20,24 | 3 P02091,P12020,P50116                                                                               |
| 3767 | 1,3,4,17,1 2,5,6,7,8,1<br>9,21,22,24 8,20,23 | 4 P02091,P16636,P50116,Q4G075                                                                        |
| 3768 | 1,3,4,17,1 2,5,6,7,8,1<br>9,21,23,24 8,20,22 | 2 P12020,Q4G075                                                                                      |
| 3769 | 1,3,4,17,1 2,5,6,7,8,1<br>9,22,23,24 8,20,21 | 8 P02091,P02631,P06760,P25809,P50116,P62804,P70549,Q00715                                            |
| 3770 | 1,3,4,17,2 2,5,6,7,8,1<br>0,21,22,23 8,19,24 | 2 P20766,P50115                                                                                      |
| 3771 | 1,3,4,17,2 2,5,6,7,8,1<br>0,21,22,24 8,19,23 | 2 P20766,P50115                                                                                      |
| 3772 | 1,3,4,17,2 2,5,6,7,8,1<br>0,21,23,24 8,19,22 | 3 O54858,P50115,Q9QYP1                                                                               |
| 3773 | 1,3,4,17,2 2,5,6,7,8,1<br>0,22,23,24 8,19,21 | 7 P02631,P06760,P50115,P50116,P62804,Q00715,Q9QYP1                                                   |
| 3774 | 1,3,4,17,2 2,5,6,7,8,1<br>1,22,23,24 8,19,20 | 4 P50115,P50116,P50280,Q4G075                                                                        |
| 3775 | 1,3,4,18,1 2,5,6,7,8,1<br>9,20,21,22 7,23,24 | 5 O54858,P01039,P50115,P50116,P97840                                                                 |
| 3776 | 1,3,4,18,1 2,5,6,7,8,1<br>9,20,21,23 7,22,24 | 5 O54858,P01039,P10758,P50115,P50116                                                                 |
| 3777 | 1,3,4,18,1 2,5,6,7,8,1<br>9,20,21,24 7,22,23 | 3 O54858,P50115,P50116                                                                               |
| 3778 | 1,3,4,18,1 2,5,6,7,8,1<br>9,20,22,23 7,21,24 | 8 P01039,P10758,P36860,P50115,P50116,Q00715,Q63474,Q6AY61                                            |
| 3779 | 1,3,4,18,1 2,5,6,7,8,1<br>9,20,22,24 7,21,23 | 3 P06760,P50115,P50116                                                                               |
| 3780 | 1,3,4,18,1 2,5,6,7,8,1<br>9,20,23,24 7,21,22 | 5 P06760,P10758,P50115,P50116,Q9QYP1                                                                 |
| 3781 | 1,3,4,18,1 2,5,6,7,8,1<br>9,21,22,23 7,20,24 | 3 P01039,P50115,P50116                                                                               |
| 3782 | 1,3,4,18,1 2,5,6,7,8,1<br>9,21,22,24 7,20,23 | 7 P17559,P19132,P25031,P50115,P50116,P55091,Q4G075                                                   |
| 3783 | 1,3,4,18,1 2,5,6,7,8,1<br>9,21,23,24 7,20,22 | 5 P12020,P50115,P50116,Q4G075,Q9Z0J6                                                                 |
| 3784 | 1,3,4,18,1 2,5,6,7,8,1<br>9,22,23,24 7,20,21 | 14 D4A5U3,P02631,P06760,P13676,P25809,P36375,P50115,P50116,P55091,P62804,Q00715,Q4G075,Q9QX74,Q9WTT6 |

|      |                          |                               |    |                                                                              |
|------|--------------------------|-------------------------------|----|------------------------------------------------------------------------------|
| 3785 | 1,3,4,18,2<br>0,21,22,23 | 2,5,6,7,8,1<br>7,19,24        | 4  | P01039,P50115,P50116,P54921                                                  |
| 3786 | 1,3,4,18,2<br>0,21,22,24 | 2,5,6,7,8,1<br>7,19,23        | 3  | P50115,P50116,Q8CJD3                                                         |
| 3787 | 1,3,4,18,2<br>0,21,23,24 | 2,5,6,7,8,1<br>7,19,22        | 3  | P50115,P50116,Q9QYP1                                                         |
| 3788 | 1,3,4,18,2<br>0,22,23,24 | 2,5,6,7,8,1<br>7,19,21        | 9  | P02631,P06760,P50115,P50116,P62804,Q00715,Q5QE79,Q9QX74,Q9QYP1               |
| 3789 | 1,3,4,18,2<br>1,22,23,24 | 2,5,6,7,8,1<br>7,19,20        | 7  | D4A5U3,P13676,P50115,P50116,Q4G075,Q8CJD3,Q9WTT6                             |
| 3790 | 1,3,4,19,2<br>0,21,22,23 | 2,5,6,7,8,1<br>7,18,24        | 4  | P01039,P10758,P50115,P50116                                                  |
| 3791 | 1,3,4,19,2<br>0,21,22,24 | 2,5,6,7,8,1<br>7,18,23        | 5  | O70594,P16636,P50115,P50116,Q64335                                           |
| 3792 | 1,3,4,19,2<br>0,21,23,24 | 2,5,6,7,8,1<br>7,18,22        | 5  | O54858,P10758,P50115,P50116,Q64335                                           |
| 3793 | 1,3,4,19,2<br>0,22,23,24 | 2,5,6,7,8,1<br>7,18,21        | 9  | P02631,P06760,P10758,P50115,P50116,P62804,Q00715,Q64335,Q9QX74               |
| 3794 | 1,3,4,19,2<br>1,22,23,24 | 2,5,6,7,8,1<br>7,18,20        | 8  | P12020,P25809,P50115,P50116,P55091,Q4G075,Q64335,Q9Z0J6                      |
| 3795 | 1,3,4,20,2<br>1,22,23,24 | 2,5,6,7,8,1<br>7,18,19        | 5  | P00762,P20766,P50115,P50116,Q9QX74                                           |
| 3796 | 1,3,5,6,7,8<br>,17,18    | 2,4,19,20,<br>21,22,23,2<br>4 | 3  | O70594,P13432,P49134                                                         |
| 3797 | 1,3,5,6,7,8<br>,17,19    | 2,4,18,20,<br>21,22,23,2<br>4 | 2  | O70594,P50115                                                                |
| 3798 | 1,3,5,6,7,8<br>,17,20    | 2,4,18,19,<br>21,22,23,2<br>4 | 6  | O70417,P06911,P13676,Q5GRG2,Q6IG05,Q6IMF3                                    |
| 3799 | 1,3,5,6,7,8<br>,17,21    | 2,4,18,19,<br>20,22,23,2<br>4 | 11 | O70594,P04762,P05539,P08937,P36860,P50115,Q4FZU2,Q6IFW6,Q6IG05,Q6IMF3,Q9QX74 |
| 3800 | 1,3,5,6,7,8<br>,17,22    | 2,4,18,19,<br>20,21,23,2<br>4 | 5  | P01946,P02091,P23593,P35280,Q09030                                           |
| 3801 | 1,3,5,6,7,8<br>,17,23    | 2,4,18,19,<br>20,21,22,2<br>4 | 4  | O70594,P50115,Q09030,Q6IG05                                                  |

|      |                       |                               |                                                                                 |
|------|-----------------------|-------------------------------|---------------------------------------------------------------------------------|
| 3802 | 1,3,5,6,7,8<br>,17,24 | 2,4,18,19,<br>20,21,22,2<br>3 | 4 O70594,Q4FZU2,Q6IFW6,Q6IMF3                                                   |
| 3803 | 1,3,5,6,7,8<br>,18,19 | 2,4,17,20,<br>21,22,23,2<br>4 | 1 P08937                                                                        |
| 3804 | 1,3,5,6,7,8<br>,18,20 | 2,4,17,19,<br>21,22,23,2<br>4 | 6 P06911,P19629,P31044,P47967,Q6IG05,Q9R168                                     |
| 3805 | 1,3,5,6,7,8<br>,18,21 | 2,4,17,19,<br>20,22,23,2<br>4 | 4 O70594,P08937,P47967,P49134                                                   |
| 3806 | 1,3,5,6,7,8<br>,18,22 | 2,4,17,19,<br>20,21,23,2<br>4 | 3 P23593,P35280,P49134                                                          |
| 3807 | 1,3,5,6,7,8<br>,18,23 | 2,4,17,19,<br>20,21,22,2<br>4 | 3 O70594,P49134,Q09030                                                          |
| 3808 | 1,3,5,6,7,8<br>,18,24 | 2,4,17,19,<br>20,21,22,2<br>3 | 1 P49134                                                                        |
| 3809 | 1,3,5,6,7,8<br>,19,20 | 2,4,17,18,<br>21,22,23,2<br>4 | 11 D3ZUC6,P02780,P06911,P08937,P19218,P19629,P31044,P47967,Q5I0D1,Q6IG05,Q9QW07 |
| 3810 | 1,3,5,6,7,8<br>,19,21 | 2,4,17,18,<br>20,22,23,2<br>4 | 7 D3ZUC6,iRT-Kit_WR_fusion,P08937,P47967,P50115,Q63493,Q6IMF3                   |
| 3811 | 1,3,5,6,7,8<br>,19,22 | 2,4,17,18,<br>20,21,23,2<br>4 | 4 P01946,P08937,P19218,P35280                                                   |
| 3812 | 1,3,5,6,7,8<br>,19,23 | 2,4,17,18,<br>20,21,22,2<br>4 | 2 O35077,P50115                                                                 |
| 3813 | 1,3,5,6,7,8<br>,19,24 | 2,4,17,18,<br>20,21,22,2<br>3 | 0                                                                               |
| 3814 | 1,3,5,6,7,8<br>,20,21 | 2,4,17,18,<br>19,22,23,2<br>4 | 11 D3ZUC6,P06911,P08937,P19629,P47967,Q5I0D1,Q5RKI1,Q63493,Q6IFW6,Q6IG05,Q6IMF3 |

|      |                        |                               |                                                    |
|------|------------------------|-------------------------------|----------------------------------------------------|
| 3815 | 1,3,5,6,7,8<br>,20,22  | 2,4,17,18,<br>19,21,23,2<br>4 | 4 P06911,P19218,P19629,P35280                      |
| 3816 | 1,3,5,6,7,8<br>,20,23  | 2,4,17,18,<br>19,21,22,2<br>4 | 6 P06911,P19629,P23739,P25031,Q09030,Q6IG05        |
| 3817 | 1,3,5,6,7,8<br>,20,24  | 2,4,17,18,<br>19,21,22,2<br>3 | 6 P06911,Q6IFW6,Q6IG05,Q6IMF3,Q9JHB9,Q9QW07        |
| 3818 | 1,3,5,6,7,8<br>,21,22  | 2,4,17,18,<br>19,20,23,2<br>4 | 6 P01946,P08937,P19218,P35280,Q09030,Q62714        |
| 3819 | 1,3,5,6,7,8<br>,21,23  | 2,4,17,18,<br>19,20,22,2<br>4 | 5 O70594,P19629,Q09030,Q62714,Q6IG05               |
| 3820 | 1,3,5,6,7,8<br>,21,24  | 2,4,17,18,<br>19,20,22,2<br>3 | 7 P04762,P30919,P36860,Q4FZU2,Q62714,Q6IFW6,Q6IMF3 |
| 3821 | 1,3,5,6,7,8<br>,22,23  | 2,4,17,18,<br>19,20,21,2<br>4 | 7 P02783,P19218,P23593,P35280,P49134,Q09030,Q62714 |
| 3822 | 1,3,5,6,7,8<br>,22,24  | 2,4,17,18,<br>19,20,21,2<br>3 | 7 P23593,P30919,P35280,P49134,Q09030,Q62714,Q6P6R2 |
| 3823 | 1,3,5,6,7,8<br>,23,24  | 2,4,17,18,<br>19,20,21,2<br>2 | 5 P25809,P49134,Q09030,Q62714,Q6P6R2               |
| 3824 | 1,3,5,6,7,1<br>7,18,19 | 2,4,8,20,2<br>1,22,23,24      | 0                                                  |
| 3825 | 1,3,5,6,7,1<br>7,18,20 | 2,4,8,19,2<br>1,22,23,24      | 0                                                  |
| 3826 | 1,3,5,6,7,1<br>7,18,21 | 2,4,8,19,2<br>0,22,23,24      | 3 P04762,P05539,P36860                             |
| 3827 | 1,3,5,6,7,1<br>7,18,22 | 2,4,8,19,2<br>0,21,23,24      | 2 P01946,P02091                                    |
| 3828 | 1,3,5,6,7,1<br>7,18,23 | 2,4,8,19,2<br>0,21,22,24      | 1 O70594                                           |
| 3829 | 1,3,5,6,7,1<br>7,18,24 | 2,4,8,19,2<br>0,21,22,23      | 1 Q6AY61                                           |
| 3830 | 1,3,5,6,7,1<br>7,19,20 | 2,4,8,18,2<br>1,22,23,24      | 1 P47967                                           |

|      |                        |                          |                                      |
|------|------------------------|--------------------------|--------------------------------------|
| 3831 | 1,3,5,6,7,1<br>7,19,21 | 2,4,8,18,2<br>0,22,23,24 | 3 P05539,Q5QE79,Q6AY61               |
| 3832 | 1,3,5,6,7,1<br>7,19,22 | 2,4,8,18,2<br>0,21,23,24 | 2 P01946,P02091                      |
| 3833 | 1,3,5,6,7,1<br>7,19,23 | 2,4,8,18,2<br>0,21,22,24 | 1 P25809                             |
| 3834 | 1,3,5,6,7,1<br>7,19,24 | 2,4,8,18,2<br>0,21,22,23 | 4 P08721,P25809,P54921,Q6AY61        |
| 3835 | 1,3,5,6,7,1<br>7,20,21 | 2,4,8,18,1<br>9,22,23,24 | 4 P04762,P05539,P47967,Q6AY61        |
| 3836 | 1,3,5,6,7,1<br>7,20,22 | 2,4,8,18,1<br>9,21,23,24 | 2 P01946,P02091                      |
| 3837 | 1,3,5,6,7,1<br>7,20,23 | 2,4,8,18,1<br>9,21,22,24 | 1 P23739                             |
| 3838 | 1,3,5,6,7,1<br>7,20,24 | 2,4,8,18,1<br>9,21,22,23 | 1 Q6AY61                             |
| 3839 | 1,3,5,6,7,1<br>7,21,22 | 2,4,8,18,1<br>9,20,23,24 | 4 P01946,P02091,P05539,Q9R168        |
| 3840 | 1,3,5,6,7,1<br>7,21,23 | 2,4,8,18,1<br>9,20,22,24 | 4 P04762,P05539,P36860,Q07523        |
| 3841 | 1,3,5,6,7,1<br>7,21,24 | 2,4,8,18,1<br>9,20,22,23 | 4 P04762,P05539,P36860,Q6AY61        |
| 3842 | 1,3,5,6,7,1<br>7,22,23 | 2,4,8,18,1<br>9,20,21,24 | 5 P01946,P02091,P02783,P25809,P30120 |
| 3843 | 1,3,5,6,7,1<br>7,22,24 | 2,4,8,18,1<br>9,20,21,23 | 3 P01946,P02091,P25809               |
| 3844 | 1,3,5,6,7,1<br>7,23,24 | 2,4,8,18,1<br>9,20,21,22 | 1 P25809                             |
| 3845 | 1,3,5,6,7,1<br>8,19,20 | 2,4,8,17,2<br>1,22,23,24 | 3 P47967,P97840,Q5I0D1               |
| 3846 | 1,3,5,6,7,1<br>8,19,21 | 2,4,8,17,2<br>0,22,23,24 | 1 P47967                             |
| 3847 | 1,3,5,6,7,1<br>8,19,22 | 2,4,8,17,2<br>0,21,23,24 | 2 P01946,P19223                      |
| 3848 | 1,3,5,6,7,1<br>8,19,23 | 2,4,8,17,2<br>0,21,22,24 | 2 P19223,P25809                      |
| 3849 | 1,3,5,6,7,1<br>8,19,24 | 2,4,8,17,2<br>0,21,22,23 | 2 P19223,P25809                      |
| 3850 | 1,3,5,6,7,1<br>8,20,21 | 2,4,8,17,1<br>9,22,23,24 | 3 P47967,P97840,Q5I0D1               |

|      |                        |                          |                                                                  |
|------|------------------------|--------------------------|------------------------------------------------------------------|
| 3851 | 1,3,5,6,7,1<br>8,20,22 | 2,4,8,17,1<br>9,21,23,24 | 1 P47967                                                         |
| 3852 | 1,3,5,6,7,1<br>8,20,23 | 2,4,8,17,1<br>9,21,22,24 | 0                                                                |
| 3853 | 1,3,5,6,7,1<br>8,20,24 | 2,4,8,17,1<br>9,21,22,23 | 0                                                                |
| 3854 | 1,3,5,6,7,1<br>8,21,22 | 2,4,8,17,1<br>9,20,23,24 | 1 P01946                                                         |
| 3855 | 1,3,5,6,7,1<br>8,21,23 | 2,4,8,17,1<br>9,20,22,24 | 2 O89117,Q9JJ50                                                  |
| 3856 | 1,3,5,6,7,1<br>8,21,24 | 2,4,8,17,1<br>9,20,22,23 | 3 O89117,P04762,P36860                                           |
| 3857 | 1,3,5,6,7,1<br>8,22,23 | 2,4,8,17,1<br>9,20,21,24 | 9 D4A5U3,P02783,P19223,P25809,P30120,P36374,P47727,P97675,Q6P6R2 |
| 3858 | 1,3,5,6,7,1<br>8,22,24 | 2,4,8,17,1<br>9,20,21,23 | 4 D4A5U3,P19223,P25809,Q6P6R2                                    |
| 3859 | 1,3,5,6,7,1<br>8,23,24 | 2,4,8,17,1<br>9,20,21,22 | 5 D4A5U3,P19223,P25809,P97675,Q6P6R2                             |
| 3860 | 1,3,5,6,7,1<br>9,20,21 | 2,4,8,17,1<br>8,22,23,24 | 6 D3ZUC6,P22283,P47967,P97840,Q5I0D1,Q63617                      |
| 3861 | 1,3,5,6,7,1<br>9,20,22 | 2,4,8,17,1<br>8,21,23,24 | 3 P01946,P19218,P47967                                           |
| 3862 | 1,3,5,6,7,1<br>9,20,23 | 2,4,8,17,1<br>8,21,22,24 | 1 P23739                                                         |
| 3863 | 1,3,5,6,7,1<br>9,20,24 | 2,4,8,17,1<br>8,21,22,23 | 1 P47967                                                         |
| 3864 | 1,3,5,6,7,1<br>9,21,22 | 2,4,8,17,1<br>8,20,23,24 | 3 P01946,P02091,P47967                                           |
| 3865 | 1,3,5,6,7,1<br>9,21,23 | 2,4,8,17,1<br>8,20,22,24 | 0                                                                |
| 3866 | 1,3,5,6,7,1<br>9,21,24 | 2,4,8,17,1<br>8,20,22,23 | 1 Q6AY61                                                         |
| 3867 | 1,3,5,6,7,1<br>9,22,23 | 2,4,8,17,1<br>8,20,21,24 | 7 P01946,P02091,P02783,P19218,P19223,P25809,P47727               |
| 3868 | 1,3,5,6,7,1<br>9,22,24 | 2,4,8,17,1<br>8,20,21,23 | 4 P01946,P19223,P25809,P55091                                    |
| 3869 | 1,3,5,6,7,1<br>9,23,24 | 2,4,8,17,1<br>8,20,21,22 | 2 P19223,P25809                                                  |
| 3870 | 1,3,5,6,7,2<br>0,21,22 | 2,4,8,17,1<br>8,19,23,24 | 4 P01835,P01946,P47967,Q5PQL7                                    |

|      |                        |                          |    |                                                                       |
|------|------------------------|--------------------------|----|-----------------------------------------------------------------------|
| 3871 | 1,3,5,6,7,2<br>0,21,23 | 2,4,8,17,1<br>8,19,22,24 | 3  | P01835,P09656,P47967                                                  |
| 3872 | 1,3,5,6,7,2<br>0,21,24 | 2,4,8,17,1<br>8,19,22,23 | 4  | P01835,P04762,P47967,Q6AY61                                           |
| 3873 | 1,3,5,6,7,2<br>0,22,23 | 2,4,8,17,1<br>8,19,21,24 | 2  | P02783,P09656                                                         |
| 3874 | 1,3,5,6,7,2<br>0,22,24 | 2,4,8,17,1<br>8,19,21,23 | 1  | P22006                                                                |
| 3875 | 1,3,5,6,7,2<br>0,23,24 | 2,4,8,17,1<br>8,19,21,22 | 1  | P23739                                                                |
| 3876 | 1,3,5,6,7,2<br>1,22,23 | 2,4,8,17,1<br>8,19,20,24 | 6  | P01946,P02783,P09656,P25809,P47727,Q62714                             |
| 3877 | 1,3,5,6,7,2<br>1,22,24 | 2,4,8,17,1<br>8,19,20,23 | 6  | P01946,P04762,P25809,P30919,P36860,Q62714                             |
| 3878 | 1,3,5,6,7,2<br>1,23,24 | 2,4,8,17,1<br>8,19,20,22 | 4  | P04762,P25809,P36860,Q62714                                           |
| 3879 | 1,3,5,6,7,2<br>2,23,24 | 2,4,8,17,1<br>8,19,20,21 | 10 | D4A5U3,P01946,P02783,P19223,P25809,P47727,P62804,P97675,Q62714,Q6P6R2 |
| 3880 | 1,3,5,6,8,1<br>7,18,19 | 2,4,7,20,2<br>1,22,23,24 | 1  | P13432                                                                |
| 3881 | 1,3,5,6,8,1<br>7,18,20 | 2,4,7,19,2<br>1,22,23,24 | 2  | P13432,Q9R168                                                         |
| 3882 | 1,3,5,6,8,1<br>7,18,21 | 2,4,7,19,2<br>0,22,23,24 | 1  | P13432                                                                |
| 3883 | 1,3,5,6,8,1<br>7,18,22 | 2,4,7,19,2<br>0,21,23,24 | 3  | P01946,P02091,P13432                                                  |
| 3884 | 1,3,5,6,8,1<br>7,18,23 | 2,4,7,19,2<br>0,21,22,24 | 1  | O70594                                                                |
| 3885 | 1,3,5,6,8,1<br>7,18,24 | 2,4,7,19,2<br>0,21,22,23 | 1  | P13432                                                                |
| 3886 | 1,3,5,6,8,1<br>7,19,20 | 2,4,7,18,2<br>1,22,23,24 | 1  | O89117                                                                |
| 3887 | 1,3,5,6,8,1<br>7,19,21 | 2,4,7,18,2<br>0,22,23,24 | 1  | P08937                                                                |
| 3888 | 1,3,5,6,8,1<br>7,19,22 | 2,4,7,18,2<br>0,21,23,24 | 2  | P01946,P02091                                                         |
| 3889 | 1,3,5,6,8,1<br>7,19,23 | 2,4,7,18,2<br>0,21,22,24 | 0  |                                                                       |
| 3890 | 1,3,5,6,8,1<br>7,19,24 | 2,4,7,18,2<br>0,21,22,23 | 0  |                                                                       |

|      |                        |                          |   |                                           |
|------|------------------------|--------------------------|---|-------------------------------------------|
| 3891 | 1,3,5,6,8,1<br>7,20,21 | 2,4,7,18,1<br>9,22,23,24 | 4 | P63029,Q6IFU7,Q6IG05,Q6IMF3               |
| 3892 | 1,3,5,6,8,1<br>7,20,22 | 2,4,7,18,1<br>9,21,23,24 | 3 | O89117,P01946,P02091                      |
| 3893 | 1,3,5,6,8,1<br>7,20,23 | 2,4,7,18,1<br>9,21,22,24 | 3 | P23739,P36376,Q6IG05                      |
| 3894 | 1,3,5,6,8,1<br>7,20,24 | 2,4,7,18,1<br>9,21,22,23 | 1 | Q6IMF3                                    |
| 3895 | 1,3,5,6,8,1<br>7,21,22 | 2,4,7,18,1<br>9,20,23,24 | 2 | P01946,P02091                             |
| 3896 | 1,3,5,6,8,1<br>7,21,23 | 2,4,7,18,1<br>9,20,22,24 | 0 |                                           |
| 3897 | 1,3,5,6,8,1<br>7,21,24 | 2,4,7,18,1<br>9,20,22,23 | 6 | P04762,P36860,Q4FZU2,Q6IFW6,Q6IMF3,Q80WL1 |
| 3898 | 1,3,5,6,8,1<br>7,22,23 | 2,4,7,18,1<br>9,20,21,24 | 4 | P01946,P02091,P02783,Q09030               |
| 3899 | 1,3,5,6,8,1<br>7,22,24 | 2,4,7,18,1<br>9,20,21,23 | 3 | P01946,P02091,P23593                      |
| 3900 | 1,3,5,6,8,1<br>7,23,24 | 2,4,7,18,1<br>9,20,21,22 | 1 | Q80WL1                                    |
| 3901 | 1,3,5,6,8,1<br>8,19,20 | 2,4,7,17,2<br>1,22,23,24 | 1 | Q9R168                                    |
| 3902 | 1,3,5,6,8,1<br>8,19,21 | 2,4,7,17,2<br>0,22,23,24 | 1 | P08937                                    |
| 3903 | 1,3,5,6,8,1<br>8,19,22 | 2,4,7,17,2<br>0,21,23,24 | 3 | P01946,P19223,Q9QYP1                      |
| 3904 | 1,3,5,6,8,1<br>8,19,23 | 2,4,7,17,2<br>0,21,22,24 | 1 | P19223                                    |
| 3905 | 1,3,5,6,8,1<br>8,19,24 | 2,4,7,17,2<br>0,21,22,23 | 1 | P19223                                    |
| 3906 | 1,3,5,6,8,1<br>8,20,21 | 2,4,7,17,1<br>9,22,23,24 | 4 | D3ZUC6,P08937,P47967,Q9R168               |
| 3907 | 1,3,5,6,8,1<br>8,20,22 | 2,4,7,17,1<br>9,21,23,24 | 1 | Q9R168                                    |
| 3908 | 1,3,5,6,8,1<br>8,20,23 | 2,4,7,17,1<br>9,21,22,24 | 1 | Q9R168                                    |
| 3909 | 1,3,5,6,8,1<br>8,20,24 | 2,4,7,17,1<br>9,21,22,23 | 1 | Q9R168                                    |
| 3910 | 1,3,5,6,8,1<br>8,21,22 | 2,4,7,17,1<br>9,20,23,24 | 2 | P01946,P08937                             |



|      |                        |                          |                                                    |
|------|------------------------|--------------------------|----------------------------------------------------|
| 3911 | 1,3,5,6,8,1<br>8,21,23 | 2,4,7,17,1<br>9,20,22,24 | 1 P54921                                           |
| 3912 | 1,3,5,6,8,1<br>8,21,24 | 2,4,7,17,1<br>9,20,22,23 | 0                                                  |
| 3913 | 1,3,5,6,8,1<br>8,22,23 | 2,4,7,17,1<br>9,20,21,24 | 5 P02783,P19223,P36374,P54921,Q09030               |
| 3914 | 1,3,5,6,8,1<br>8,22,24 | 2,4,7,17,1<br>9,20,21,23 | 1 P19223                                           |
| 3915 | 1,3,5,6,8,1<br>8,23,24 | 2,4,7,17,1<br>9,20,21,22 | 2 P19223,P20646                                    |
| 3916 | 1,3,5,6,8,1<br>9,20,21 | 2,4,7,17,1<br>8,22,23,24 | 5 D3ZUC6,P08937,P47967,Q5I0D1,Q9JI85               |
| 3917 | 1,3,5,6,8,1<br>9,20,22 | 2,4,7,17,1<br>8,21,23,24 | 2 P01946,P19218                                    |
| 3918 | 1,3,5,6,8,1<br>9,20,23 | 2,4,7,17,1<br>8,21,22,24 | 2 P19218,P23739                                    |
| 3919 | 1,3,5,6,8,1<br>9,20,24 | 2,4,7,17,1<br>8,21,22,23 | 0                                                  |
| 3920 | 1,3,5,6,8,1<br>9,21,22 | 2,4,7,17,1<br>8,20,23,24 | 6 P01946,P02091,P08937,P19218,P30919,Q9QYP1        |
| 3921 | 1,3,5,6,8,1<br>9,21,23 | 2,4,7,17,1<br>8,20,22,24 | 2 P08937,Q9Z0J6                                    |
| 3922 | 1,3,5,6,8,1<br>9,21,24 | 2,4,7,17,1<br>8,20,22,23 | 2 P08937,P30919                                    |
| 3923 | 1,3,5,6,8,1<br>9,22,23 | 2,4,7,17,1<br>8,20,21,24 | 6 P00507,P01946,P02091,P02783,P19218,P19223        |
| 3924 | 1,3,5,6,8,1<br>9,22,24 | 2,4,7,17,1<br>8,20,21,23 | 7 P00507,P01946,P02091,P19218,P19223,P30919,P55091 |
| 3925 | 1,3,5,6,8,1<br>9,23,24 | 2,4,7,17,1<br>8,20,21,22 | 4 P19223,P25809,Q80WL1,Q9Z0J6                      |
| 3926 | 1,3,5,6,8,2<br>0,21,22 | 2,4,7,17,1<br>8,19,23,24 | 2 P01946,P19218                                    |
| 3927 | 1,3,5,6,8,2<br>0,21,23 | 2,4,7,17,1<br>8,19,22,24 | 4 D3ZUC6,P09656,P23739,Q6IG05                      |
| 3928 | 1,3,5,6,8,2<br>0,21,24 | 2,4,7,17,1<br>8,19,22,23 | 2 Q6IFW6,Q6IMF3                                    |
| 3929 | 1,3,5,6,8,2<br>0,22,23 | 2,4,7,17,1<br>8,19,21,24 | 4 P02783,P09656,P19218,P23739                      |
| 3930 | 1,3,5,6,8,2<br>0,22,24 | 2,4,7,17,1<br>8,19,21,23 | 0                                                  |

|      |                         |                          |    |                                                                                                          |
|------|-------------------------|--------------------------|----|----------------------------------------------------------------------------------------------------------|
| 3931 | 1,3,5,6,8,2<br>0,23,24  | 2,4,7,17,1<br>8,19,21,22 | 1  | P23739                                                                                                   |
| 3932 | 1,3,5,6,8,2<br>1,22,23  | 2,4,7,17,1<br>8,19,20,24 | 7  | P01946,P02783,P09656,P30919,P54921,Q09030,Q62714                                                         |
| 3933 | 1,3,5,6,8,2<br>1,22,24  | 2,4,7,17,1<br>8,19,20,23 | 3  | P01946,P30919,Q62714                                                                                     |
| 3934 | 1,3,5,6,8,2<br>1,23,24  | 2,4,7,17,1<br>8,19,20,22 | 6  | P20646,P30919,Q09030,Q62714,Q6IFW6,Q80WL1                                                                |
| 3935 | 1,3,5,6,8,2<br>2,23,24  | 2,4,7,17,1<br>8,19,20,21 | 12 | P00507,P01946,P02783,P19223,P20646,P25809,P30919,P62804,Q09030,Q62714,Q6P6R2,Q80WL1                      |
| 3936 | 1,3,5,6,17,<br>18,19,20 | 2,4,7,8,21,<br>22,23,24  | 2  | P20761,Q06000                                                                                            |
| 3937 | 1,3,5,6,17,<br>18,19,21 | 2,4,7,8,20,<br>22,23,24  | 2  | P05539,Q4G075                                                                                            |
| 3938 | 1,3,5,6,17,<br>18,19,22 | 2,4,7,8,20,<br>21,23,24  | 3  | P01946,P02091,Q06000                                                                                     |
| 3939 | 1,3,5,6,17,<br>18,19,23 | 2,4,7,8,20,<br>21,22,24  | 0  |                                                                                                          |
| 3940 | 1,3,5,6,17,<br>18,19,24 | 2,4,7,8,20,<br>21,22,23  | 1  | Q4G075                                                                                                   |
| 3941 | 1,3,5,6,17,<br>18,20,21 | 2,4,7,8,19,<br>22,23,24  | 1  | P05539                                                                                                   |
| 3942 | 1,3,5,6,17,<br>18,20,22 | 2,4,7,8,19,<br>21,23,24  | 2  | P01946,P02091                                                                                            |
| 3943 | 1,3,5,6,17,<br>18,20,23 | 2,4,7,8,19,<br>21,22,24  | 0  |                                                                                                          |
| 3944 | 1,3,5,6,17,<br>18,20,24 | 2,4,7,8,19,<br>21,22,23  | 0  |                                                                                                          |
| 3945 | 1,3,5,6,17,<br>18,21,22 | 2,4,7,8,19,<br>20,23,24  | 4  | P01946,P02091,P05539,Q4G075                                                                              |
| 3946 | 1,3,5,6,17,<br>18,21,23 | 2,4,7,8,19,<br>20,22,24  | 1  | Q4G075                                                                                                   |
| 3947 | 1,3,5,6,17,<br>18,21,24 | 2,4,7,8,19,<br>20,22,23  | 3  | P05539,P36860,Q4G075                                                                                     |
| 3948 | 1,3,5,6,17,<br>18,22,23 | 2,4,7,8,19,<br>20,21,24  | 15 | D4A5U3,P01946,P02091,P02780,P02783,P08723,P09456,P22273,P22282,P30120,P36374,P62804,P82471,Q63617,Q812E4 |
| 3949 | 1,3,5,6,17,<br>18,22,24 | 2,4,7,8,19,<br>20,21,23  | 7  | D4A5U3,P01946,P02091,P62804,Q4G075,Q63617,Q9WTT6                                                         |
| 3950 | 1,3,5,6,17,<br>18,23,24 | 2,4,7,8,19,<br>20,21,22  | 7  | D4A5U3,P02780,P25809,P62804,Q4G075,Q63617,Q9WTT6                                                         |

|      |                                              |                                                                                                             |
|------|----------------------------------------------|-------------------------------------------------------------------------------------------------------------|
| 3951 | 1,3,5,6,17, 2,4,7,8,18,<br>19,20,21 22,23,24 | 2 P05539,P20762                                                                                             |
| 3952 | 1,3,5,6,17, 2,4,7,8,18,<br>19,20,22 21,23,24 | 3 O89117,P01946,P02091                                                                                      |
| 3953 | 1,3,5,6,17, 2,4,7,8,18,<br>19,20,23 21,22,24 | 2 P23739,Q9Z1F2                                                                                             |
| 3954 | 1,3,5,6,17, 2,4,7,8,18,<br>19,20,24 21,22,23 | 1 P20762                                                                                                    |
| 3955 | 1,3,5,6,17, 2,4,7,8,18,<br>19,21,22 20,23,24 | 3 P01946,P02091,P05539                                                                                      |
| 3956 | 1,3,5,6,17, 2,4,7,8,18,<br>19,21,23 20,22,24 | 1 Q4G075                                                                                                    |
| 3957 | 1,3,5,6,17, 2,4,7,8,18,<br>19,21,24 20,22,23 | 4 P05539,P20762,Q4G075,Q6AY61                                                                               |
| 3958 | 1,3,5,6,17, 2,4,7,8,18,<br>19,22,23 20,21,24 | 7 P01946,P02091,P02783,P22273,P25809,P62804,Q00715                                                          |
| 3959 | 1,3,5,6,17, 2,4,7,8,18,<br>19,22,24 20,21,23 | 6 P01946,P02091,P25809,P62804,Q00715,Q4G075                                                                 |
| 3960 | 1,3,5,6,17, 2,4,7,8,18,<br>19,23,24 20,21,22 | 5 P22273,P25809,P62804,Q00715,Q4G075                                                                        |
| 3961 | 1,3,5,6,17, 2,4,7,8,18,<br>20,21,22 19,23,24 | 5 P01946,P02091,P05539,P20762,P20766                                                                        |
| 3962 | 1,3,5,6,17, 2,4,7,8,18,<br>20,21,23 19,22,24 | 2 P09656,P63029                                                                                             |
| 3963 | 1,3,5,6,17, 2,4,7,8,18,<br>20,21,24 19,22,23 | 3 P05539,P20762,Q6AY61                                                                                      |
| 3964 | 1,3,5,6,17, 2,4,7,8,18,<br>20,22,23 19,21,24 | 5 P01946,P02091,P02783,P62804,Q00715                                                                        |
| 3965 | 1,3,5,6,17, 2,4,7,8,18,<br>20,22,24 19,21,23 | 4 P01946,P02091,P62804,Q00715                                                                               |
| 3966 | 1,3,5,6,17, 2,4,7,8,18,<br>20,23,24 19,21,22 | 3 P23739,P62804,Q00715                                                                                      |
| 3967 | 1,3,5,6,17, 2,4,7,8,18,<br>21,22,23 19,20,24 | 3 P01946,P02091,P02783                                                                                      |
| 3968 | 1,3,5,6,17, 2,4,7,8,18,<br>21,22,24 19,20,23 | 5 P01946,P02091,P05539,P10758,Q4G075                                                                        |
| 3969 | 1,3,5,6,17, 2,4,7,8,18,<br>21,23,24 19,20,22 | 2 P36860,Q4G075                                                                                             |
| 3970 | 1,3,5,6,17, 2,4,7,8,18,<br>22,23,24 19,20,21 | 15 D4A5U3,P01946,P02091,P02780,P02783,P07150,P22273,P22282,P25809,P47727,P62804,Q00715,Q4G075,Q63617,Q9WTT6 |

|      |                                              |    |                                                                                                                                                                      |
|------|----------------------------------------------|----|----------------------------------------------------------------------------------------------------------------------------------------------------------------------|
| 3971 | 1,3,5,6,18, 2,4,7,8,17,<br>19,20,21 22,23,24 | 2  | P47967,Q5PQL7                                                                                                                                                        |
| 3972 | 1,3,5,6,18, 2,4,7,8,17,<br>19,20,22 21,23,24 | 3  | P01946,Q5PQL7,Q63474                                                                                                                                                 |
| 3973 | 1,3,5,6,18, 2,4,7,8,17,<br>19,20,23 21,22,24 | 1  | Q9Z1F2                                                                                                                                                               |
| 3974 | 1,3,5,6,18, 2,4,7,8,17,<br>19,20,24 21,22,23 | 0  |                                                                                                                                                                      |
| 3975 | 1,3,5,6,18, 2,4,7,8,17,<br>19,21,22 20,23,24 | 6  | D4A5U3,P01946,P02091,P19223,Q4G075,Q5PQL7                                                                                                                            |
| 3976 | 1,3,5,6,18, 2,4,7,8,17,<br>19,21,23 20,22,24 | 2  | D4A5U3,Q4G075                                                                                                                                                        |
| 3977 | 1,3,5,6,18, 2,4,7,8,17,<br>19,21,24 20,22,23 | 3  | D4A5U3,P19223,Q4G075                                                                                                                                                 |
| 3978 | 1,3,5,6,18, 2,4,7,8,17,<br>19,22,23 20,21,24 | 13 | D4A5U3,P01946,P02091,P02783,P09456,P19223,P22273,P25809,P30120,P47727,P62804,Q811<br>M5,Q9WTT6                                                                       |
| 3979 | 1,3,5,6,18, 2,4,7,8,17,<br>19,22,24 20,21,23 | 8  | D4A5U3,P01946,P19223,P25809,P55091,P62804,Q4G075,Q9WTT6                                                                                                              |
| 3980 | 1,3,5,6,18, 2,4,7,8,17,<br>19,23,24 20,21,22 | 7  | D4A5U3,P19223,P25809,P62804,P98089,Q4G075,Q9WTT6                                                                                                                     |
| 3981 | 1,3,5,6,18, 2,4,7,8,17,<br>20,21,22 19,23,24 | 2  | P01946,Q5PQL7                                                                                                                                                        |
| 3982 | 1,3,5,6,18, 2,4,7,8,17,<br>20,21,23 19,22,24 | 0  |                                                                                                                                                                      |
| 3983 | 1,3,5,6,18, 2,4,7,8,17,<br>20,21,24 19,22,23 | 0  |                                                                                                                                                                      |
| 3984 | 1,3,5,6,18, 2,4,7,8,17,<br>20,22,23 19,21,24 | 5  | P02783,P04355,P62804,Q66H69,Q9QX74                                                                                                                                   |
| 3985 | 1,3,5,6,18, 2,4,7,8,17,<br>20,22,24 19,21,23 | 5  | P20646,P22006,P62804,Q9QX74,Q9Z0V6                                                                                                                                   |
| 3986 | 1,3,5,6,18, 2,4,7,8,17,<br>20,23,24 19,21,22 | 3  | P20646,P62804,Q9QX74                                                                                                                                                 |
| 3987 | 1,3,5,6,18, 2,4,7,8,17,<br>21,22,23 19,20,24 | 14 | D4A5U3,P01946,P02783,P08723,P13676,P19223,P20646,P36374,P47727,P54921,P82471,Q4G0<br>75,Q6TMA8,Q9WTT6                                                                |
| 3988 | 1,3,5,6,18, 2,4,7,8,17,<br>21,22,24 19,20,23 | 6  | D4A5U3,P01946,P19223,P20646,Q4G075,Q9WTT6                                                                                                                            |
| 3989 | 1,3,5,6,18, 2,4,7,8,17,<br>21,23,24 19,20,22 | 5  | D4A5U3,P19223,P20646,Q4G075,Q9WTT6                                                                                                                                   |
| 3990 | 1,3,5,6,18, 2,4,7,8,17,<br>22,23,24 19,20,21 | 23 | D4A5U3,P01946,P02783,P06760,P07150,P13676,P19223,P20646,P22273,P22282,P24368,P2580<br>9,P36374,P47727,P62804,P97675,Q00715,Q4G075,Q63617,Q66H69,Q6P6R2,Q9QX74,Q9WTT6 |

|      |                                              |    |                                                                                                                               |
|------|----------------------------------------------|----|-------------------------------------------------------------------------------------------------------------------------------|
| 3991 | 1,3,5,6,19, 2,4,7,8,17,<br>20,21,22 18,23,24 | 4  | P01946,P02091,P19218,Q5PQL7                                                                                                   |
| 3992 | 1,3,5,6,19, 2,4,7,8,17,<br>20,21,23 18,22,24 | 1  | Q9Z1F2                                                                                                                        |
| 3993 | 1,3,5,6,19, 2,4,7,8,17,<br>20,21,24 18,22,23 | 1  | P20762                                                                                                                        |
| 3994 | 1,3,5,6,19, 2,4,7,8,17,<br>20,22,23 18,21,24 | 7  | P01946,P02091,P02783,P19218,P62804,Q00715,Q9Z1F2                                                                              |
| 3995 | 1,3,5,6,19, 2,4,7,8,17,<br>20,22,24 18,21,23 | 5  | P01946,P22006,P62804,Q9QX74,Q9Z0V6                                                                                            |
| 3996 | 1,3,5,6,19, 2,4,7,8,17,<br>20,23,24 18,21,22 | 5  | P23739,P62804,Q00715,Q9QX74,Q9Z1F2                                                                                            |
| 3997 | 1,3,5,6,19, 2,4,7,8,17,<br>21,22,23 18,20,24 | 9  | D4A5U3,P01946,P02091,P02783,P19223,P25809,P47727,Q4G075,Q811M5                                                                |
| 3998 | 1,3,5,6,19, 2,4,7,8,17,<br>21,22,24 18,20,23 | 8  | D4A5U3,P01946,P02091,P19223,P25809,P30919,P55091,Q4G075                                                                       |
| 3999 | 1,3,5,6,19, 2,4,7,8,17,<br>21,23,24 18,20,22 | 5  | D4A5U3,P19223,P25809,Q4G075,Q9Z0J6                                                                                            |
| 4000 | 1,3,5,6,19, 2,4,7,8,17,<br>22,23,24 18,20,21 | 18 | D4A5U3,P00507,P01946,P02091,P02783,P13676,P19223,P22273,P25809,P47727,P55091,P62804,Q00715,Q4G075,Q6P6R2,Q811M5,Q9QX74,Q9WTT6 |
| 4001 | 1,3,5,6,20, 2,4,7,8,17,<br>21,22,23 18,19,24 | 3  | P01946,P02783,P09656                                                                                                          |
| 4002 | 1,3,5,6,20, 2,4,7,8,17,<br>21,22,24 18,19,23 | 1  | P01946                                                                                                                        |
| 4003 | 1,3,5,6,20, 2,4,7,8,17,<br>21,23,24 18,19,22 | 2  | P09656,P20646                                                                                                                 |
| 4004 | 1,3,5,6,20, 2,4,7,8,17,<br>22,23,24 18,19,21 | 12 | P01946,P02783,P07150,P09656,P20646,P22006,P23739,P62804,Q00715,Q66H69,Q6P6R2,Q9QX74                                           |
| 4005 | 1,3,5,6,21, 2,4,7,8,17,<br>22,23,24 18,19,20 | 14 | D4A5U3,P01946,P02783,P07150,P09656,P13676,P19223,P20646,P25809,P30919,P47727,Q4G075,Q62714,Q9WTT6                             |
| 4006 | 1,3,5,7,8,1 2,4,6,20,2<br>7,18,19 1,22,23,24 | 3  | P01681,P22006,Q9QX74                                                                                                          |
| 4007 | 1,3,5,7,8,1 2,4,6,19,2<br>7,18,20 1,22,23,24 | 3  | P13676,P47967,Q811M5                                                                                                          |
| 4008 | 1,3,5,7,8,1 2,4,6,19,2<br>7,18,21 0,22,23,24 | 4  | P06760,P22006,Q811M5,Q9QX74                                                                                                   |
| 4009 | 1,3,5,7,8,1 2,4,6,19,2<br>7,18,22 0,21,23,24 | 1  | P35280                                                                                                                        |
| 4010 | 1,3,5,7,8,1 2,4,6,19,2<br>7,18,23 0,21,22,24 | 2  | O70594,P22006                                                                                                                 |

|      |                        |                          |    |                                                                                                |
|------|------------------------|--------------------------|----|------------------------------------------------------------------------------------------------|
| 4011 | 1,3,5,7,8,1<br>7,18,24 | 2,4,6,19,2<br>0,21,22,23 | 2  | P49134,Q811M5                                                                                  |
| 4012 | 1,3,5,7,8,1<br>7,19,20 | 2,4,6,18,2<br>1,22,23,24 | 6  | P13676,P47967,Q5I0D1,Q6IMF3,Q811M5,Q9WTT6                                                      |
| 4013 | 1,3,5,7,8,1<br>7,19,21 | 2,4,6,18,2<br>0,22,23,24 | 8  | P06760,P22006,Q4FZU2,Q66H69,Q6IFW6,Q6IMF3,Q811M5,Q9QX74                                        |
| 4014 | 1,3,5,7,8,1<br>7,19,22 | 2,4,6,18,2<br>0,21,23,24 | 2  | P01681,P35280                                                                                  |
| 4015 | 1,3,5,7,8,1<br>7,19,23 | 2,4,6,18,2<br>0,21,22,24 | 3  | P01681,P21674,P22006                                                                           |
| 4016 | 1,3,5,7,8,1<br>7,19,24 | 2,4,6,18,2<br>0,21,22,23 | 4  | P01681,P54921,Q4FZU2,Q6IMF3                                                                    |
| 4017 | 1,3,5,7,8,1<br>7,20,21 | 2,4,6,18,1<br>9,22,23,24 | 13 | D3ZUC6,P06760,P13676,P22006,P47967,Q4FZU2,Q6IFW6,Q6IMF3,Q6P6Q2,Q811M5,Q9EQS0,<br>Q9QX74,Q9WTT6 |
| 4018 | 1,3,5,7,8,1<br>7,20,22 | 2,4,6,18,1<br>9,21,23,24 | 1  | P35280                                                                                         |
| 4019 | 1,3,5,7,8,1<br>7,20,23 | 2,4,6,18,1<br>9,21,22,24 | 2  | P23739,Q6IMF3                                                                                  |
| 4020 | 1,3,5,7,8,1<br>7,20,24 | 2,4,6,18,1<br>9,21,22,23 | 6  | P13676,Q4FZU2,Q6IFW6,Q6IMF3,Q6P6Q2,Q811M5                                                      |
| 4021 | 1,3,5,7,8,1<br>7,21,22 | 2,4,6,18,1<br>9,20,23,24 | 3  | P35280,Q6IFW6,Q6IMF3                                                                           |
| 4022 | 1,3,5,7,8,1<br>7,21,23 | 2,4,6,18,1<br>9,20,22,24 | 4  | P22006,Q4FZU2,Q6IFW6,Q6IMF3                                                                    |
| 4023 | 1,3,5,7,8,1<br>7,21,24 | 2,4,6,18,1<br>9,20,22,23 | 8  | P04762,Q4FZU2,Q6AY61,Q6IFW6,Q6IMF3,Q6P6Q2,Q80WL1,Q811M5                                        |
| 4024 | 1,3,5,7,8,1<br>7,22,23 | 2,4,6,18,1<br>9,20,21,24 | 2  | P35280,Q68G31                                                                                  |
| 4025 | 1,3,5,7,8,1<br>7,22,24 | 2,4,6,18,1<br>9,20,21,23 | 2  | P35280,Q6IFW6                                                                                  |
| 4026 | 1,3,5,7,8,1<br>7,23,24 | 2,4,6,18,1<br>9,20,21,22 | 4  | Q4FZU2,Q6IFW6,Q6IMF3,Q80WL1                                                                    |
| 4027 | 1,3,5,7,8,1<br>8,19,20 | 2,4,6,17,2<br>1,22,23,24 | 5  | D3ZUC6,P47967,P97840,Q5I0D1,Q9R168                                                             |
| 4028 | 1,3,5,7,8,1<br>8,19,21 | 2,4,6,17,2<br>0,22,23,24 | 6  | D3ZUC6,O35077,P06760,P08937,P22006,P47967                                                      |
| 4029 | 1,3,5,7,8,1<br>8,19,22 | 2,4,6,17,2<br>0,21,23,24 | 3  | O35077,P19223,P35280                                                                           |
| 4030 | 1,3,5,7,8,1<br>8,19,23 | 2,4,6,17,2<br>0,21,22,24 | 1  | O35077                                                                                         |

|      |                        |                          |    |                                                                                            |
|------|------------------------|--------------------------|----|--------------------------------------------------------------------------------------------|
| 4031 | 1,3,5,7,8,1<br>8,19,24 | 2,4,6,17,2<br>0,21,22,23 | 1  | P19223                                                                                     |
| 4032 | 1,3,5,7,8,1<br>8,20,21 | 2,4,6,17,1<br>9,22,23,24 | 6  | D3ZUC6,P06760,P47967,P97840,Q5I0D1,Q811M5                                                  |
| 4033 | 1,3,5,7,8,1<br>8,20,22 | 2,4,6,17,1<br>9,21,23,24 | 2  | P35280,P47967                                                                              |
| 4034 | 1,3,5,7,8,1<br>8,20,23 | 2,4,6,17,1<br>9,21,22,24 | 3  | D3ZUC6,P23739,Q9R168                                                                       |
| 4035 | 1,3,5,7,8,1<br>8,20,24 | 2,4,6,17,1<br>9,21,22,23 | 3  | P47967,Q811M5,Q9R168                                                                       |
| 4036 | 1,3,5,7,8,1<br>8,21,22 | 2,4,6,17,1<br>9,20,23,24 | 1  | P35280                                                                                     |
| 4037 | 1,3,5,7,8,1<br>8,21,23 | 2,4,6,17,1<br>9,20,22,24 | 4  | D3ZUC6,O35077,O89117,P22006                                                                |
| 4038 | 1,3,5,7,8,1<br>8,21,24 | 2,4,6,17,1<br>9,20,22,23 | 3  | O89117,P49134,Q6IFW6                                                                       |
| 4039 | 1,3,5,7,8,1<br>8,22,23 | 2,4,6,17,1<br>9,20,21,24 | 3  | P19223,P35280,P49134                                                                       |
| 4040 | 1,3,5,7,8,1<br>8,22,24 | 2,4,6,17,1<br>9,20,21,23 | 3  | P19223,P35280,P49134                                                                       |
| 4041 | 1,3,5,7,8,1<br>8,23,24 | 2,4,6,17,1<br>9,20,21,22 | 2  | P19223,P49134                                                                              |
| 4042 | 1,3,5,7,8,1<br>9,20,21 | 2,4,6,17,1<br>8,22,23,24 | 13 | D3ZUC6,P06760,P08649,P08937,P47967,P97840,Q5I0D1,Q5RKI1,Q6IFW6,Q6IMF3,Q811M5,Q9EQS0,Q9WTT6 |
| 4043 | 1,3,5,7,8,1<br>9,20,22 | 2,4,6,17,1<br>8,21,23,24 | 4  | P19218,P35280,P47967,Q5I0D1                                                                |
| 4044 | 1,3,5,7,8,1<br>9,20,23 | 2,4,6,17,1<br>8,21,22,24 | 4  | D3ZUC6,P23739,P47967,Q5I0D1                                                                |
| 4045 | 1,3,5,7,8,1<br>9,20,24 | 2,4,6,17,1<br>8,21,22,23 | 4  | P47967,Q5I0D1,Q6IFW6,Q6IMF3                                                                |
| 4046 | 1,3,5,7,8,1<br>9,21,22 | 2,4,6,17,1<br>8,20,23,24 | 5  | O35077,P08937,P35280,P47967,Q9QYP1                                                         |
| 4047 | 1,3,5,7,8,1<br>9,21,23 | 2,4,6,17,1<br>8,20,22,24 | 6  | D3ZUC6,O35077,P08649,P22006,Q6IMF3,Q9Z0J6                                                  |
| 4048 | 1,3,5,7,8,1<br>9,21,24 | 2,4,6,17,1<br>8,20,22,23 | 5  | P08649,P55091,Q6IFW6,Q6IMF3,Q9WU74                                                         |
| 4049 | 1,3,5,7,8,1<br>9,22,23 | 2,4,6,17,1<br>8,20,21,24 | 3  | O35077,P19223,P35280                                                                       |
| 4050 | 1,3,5,7,8,1<br>9,22,24 | 2,4,6,17,1<br>8,20,21,23 | 3  | P19223,P35280,P55091                                                                       |

|      |                         |                          |    |                                                                       |
|------|-------------------------|--------------------------|----|-----------------------------------------------------------------------|
| 4051 | 1,3,5,7,8,1<br>9,23,24  | 2,4,6,17,1<br>8,20,21,22 | 4  | P19223,P55091,Q80WL1,Q9Z0J6                                           |
| 4052 | 1,3,5,7,8,2<br>0,21,22  | 2,4,6,17,1<br>8,19,23,24 | 5  | D3ZUC6,P08649,P35280,P47967,Q6IFW6                                    |
| 4053 | 1,3,5,7,8,2<br>0,21,23  | 2,4,6,17,1<br>8,19,22,24 | 7  | D3ZUC6,P08649,P19132,P23739,P47967,Q6IFW6,Q6IMF3                      |
| 4054 | 1,3,5,7,8,2<br>0,21,24  | 2,4,6,17,1<br>8,19,22,23 | 10 | D3ZUC6,P08649,P47967,Q4FZU2,Q6IFW6,Q6IMF3,Q6P6Q2,Q811M5,Q9EQS0,Q9WU74 |
| 4055 | 1,3,5,7,8,2<br>0,22,23  | 2,4,6,17,1<br>8,19,21,24 | 2  | P23739,P35280                                                         |
| 4056 | 1,3,5,7,8,2<br>0,22,24  | 2,4,6,17,1<br>8,19,21,23 | 2  | P35280,Q6IFW6                                                         |
| 4057 | 1,3,5,7,8,2<br>0,23,24  | 2,4,6,17,1<br>8,19,21,22 | 4  | P08649,P23739,Q6IFW6,Q6IMF3                                           |
| 4058 | 1,3,5,7,8,2<br>1,22,23  | 2,4,6,17,1<br>8,19,20,24 | 4  | O35077,P08649,P35280,Q62714                                           |
| 4059 | 1,3,5,7,8,2<br>1,22,24  | 2,4,6,17,1<br>8,19,20,23 | 6  | P08649,P35280,P55091,Q62714,Q6IFW6,Q6IMF3                             |
| 4060 | 1,3,5,7,8,2<br>1,23,24  | 2,4,6,17,1<br>8,19,20,22 | 6  | P08649,Q4FZU2,Q62714,Q6IFW6,Q6IMF3,Q80WL1                             |
| 4061 | 1,3,5,7,8,2<br>2,23,24  | 2,4,6,17,1<br>8,19,20,21 | 8  | P19223,P25809,P35280,P49134,P55091,Q62714,Q6P6R2,Q80WL1               |
| 4062 | 1,3,5,7,17,<br>18,19,20 | 2,4,6,8,21,<br>22,23,24  | 5  | P30919,P47967,P97840,Q63532,Q811M5                                    |
| 4063 | 1,3,5,7,17,<br>18,19,21 | 2,4,6,8,20,<br>22,23,24  | 3  | P22006,P47967,P97840                                                  |
| 4064 | 1,3,5,7,17,<br>18,19,22 | 2,4,6,8,20,<br>21,23,24  | 0  |                                                                       |
| 4065 | 1,3,5,7,17,<br>18,19,23 | 2,4,6,8,20,<br>21,22,24  | 1  | Q10743                                                                |
| 4066 | 1,3,5,7,17,<br>18,19,24 | 2,4,6,8,20,<br>21,22,23  | 2  | P54921,Q63532                                                         |
| 4067 | 1,3,5,7,17,<br>18,20,21 | 2,4,6,8,19,<br>22,23,24  | 5  | P00507,P47967,P97840,Q63532,Q811M5                                    |
| 4068 | 1,3,5,7,17,<br>18,20,22 | 2,4,6,8,19,<br>21,23,24  | 2  | P97840,Q63474                                                         |
| 4069 | 1,3,5,7,17,<br>18,20,23 | 2,4,6,8,19,<br>21,22,24  | 1  | P30919                                                                |
| 4070 | 1,3,5,7,17,<br>18,20,24 | 2,4,6,8,19,<br>21,22,23  | 2  | Q63532,Q811M5                                                         |



|      |                                              |                                                           |
|------|----------------------------------------------|-----------------------------------------------------------|
| 4071 | 1,3,5,7,17, 2,4,6,8,19,<br>18,21,22 20,23,24 | 0                                                         |
| 4072 | 1,3,5,7,17, 2,4,6,8,19,<br>18,21,23 20,22,24 | 1 P22006                                                  |
| 4073 | 1,3,5,7,17, 2,4,6,8,19,<br>18,21,24 20,22,23 | 3 P04762,Q6AY61,Q811M5                                    |
| 4074 | 1,3,5,7,17, 2,4,6,8,19,<br>18,22,23 20,21,24 | 3 P30120,P36374,Q68G31                                    |
| 4075 | 1,3,5,7,17, 2,4,6,8,19,<br>18,22,24 20,21,23 | 1 P02631                                                  |
| 4076 | 1,3,5,7,17, 2,4,6,8,19,<br>18,23,24 20,21,22 | 0                                                         |
| 4077 | 1,3,5,7,17, 2,4,6,8,18,<br>19,20,21 22,23,24 | 8 O54858,P20762,P47967,P97840,Q5I0D1,Q63532,Q6AY61,Q811M5 |
| 4078 | 1,3,5,7,17, 2,4,6,8,18,<br>19,20,22 21,23,24 | 0                                                         |
| 4079 | 1,3,5,7,17, 2,4,6,8,18,<br>19,20,23 21,22,24 | 1 P23739                                                  |
| 4080 | 1,3,5,7,17, 2,4,6,8,18,<br>19,20,24 21,22,23 | 3 P54921,Q63532,Q6AY61                                    |
| 4081 | 1,3,5,7,17, 2,4,6,8,18,<br>19,21,22 20,23,24 | 3 P01946,P02091,Q9R168                                    |
| 4082 | 1,3,5,7,17, 2,4,6,8,18,<br>19,21,23 20,22,24 | 2 P12020,P22006                                           |
| 4083 | 1,3,5,7,17, 2,4,6,8,18,<br>19,21,24 20,22,23 | 3 P12020,P54921,Q6AY61                                    |
| 4084 | 1,3,5,7,17, 2,4,6,8,18,<br>19,22,23 20,21,24 | 2 P02091,P02631                                           |
| 4085 | 1,3,5,7,17, 2,4,6,8,18,<br>19,22,24 20,21,23 | 2 P02631,P54921                                           |
| 4086 | 1,3,5,7,17, 2,4,6,8,18,<br>19,23,24 20,21,22 | 5 O55145,P02631,P12020,P25809,P54921                      |
| 4087 | 1,3,5,7,17, 2,4,6,8,18,<br>20,21,22 19,23,24 | 1 P47967                                                  |
| 4088 | 1,3,5,7,17, 2,4,6,8,18,<br>20,21,23 19,22,24 | 1 P08649                                                  |
| 4089 | 1,3,5,7,17, 2,4,6,8,18,<br>20,21,24 19,22,23 | 6 P04762,P08649,P20762,Q63532,Q6AY61,Q811M5               |
| 4090 | 1,3,5,7,17, 2,4,6,8,18,<br>20,22,23 19,21,24 | 2 P23739,Q68G31                                           |

|      |                                              |                                             |
|------|----------------------------------------------|---------------------------------------------|
| 4091 | 1,3,5,7,17, 2,4,6,8,18,<br>20,22,24 19,21,23 | 0                                           |
| 4092 | 1,3,5,7,17, 2,4,6,8,18,<br>20,23,24 19,21,22 | 1 P23739                                    |
| 4093 | 1,3,5,7,17, 2,4,6,8,18,<br>21,22,23 19,20,24 | 3 P50280,Q68G31,Q9R168                      |
| 4094 | 1,3,5,7,17, 2,4,6,8,18,<br>21,22,24 19,20,23 | 2 P50280,Q9R168                             |
| 4095 | 1,3,5,7,17, 2,4,6,8,18,<br>21,23,24 19,20,22 | 5 P04762,P08649,P12020,P50280,Q6AY61        |
| 4096 | 1,3,5,7,17, 2,4,6,8,18,<br>22,23,24 19,20,21 | 6 P02631,P22273,P25809,P50280,Q00715,Q68G31 |
| 4097 | 1,3,5,7,18, 2,4,6,8,17,<br>19,20,21 22,23,24 | 6 D3ZUC6,P07335,P47967,P97840,Q5I0D1,Q63532 |
| 4098 | 1,3,5,7,18, 2,4,6,8,17,<br>19,20,22 21,23,24 | 3 P47967,P97840,Q63474                      |
| 4099 | 1,3,5,7,18, 2,4,6,8,17,<br>19,20,23 21,22,24 | 2 P47967,P97840                             |
| 4100 | 1,3,5,7,18, 2,4,6,8,17,<br>19,20,24 21,22,23 | 3 P47967,P97840,Q63532                      |
| 4101 | 1,3,5,7,18, 2,4,6,8,17,<br>19,21,22 20,23,24 | 3 P17559,P47967,P97840                      |
| 4102 | 1,3,5,7,18, 2,4,6,8,17,<br>19,21,23 20,22,24 | 3 P12020,P22006,P97840                      |
| 4103 | 1,3,5,7,18, 2,4,6,8,17,<br>19,21,24 20,22,23 | 4 P17559,P47967,P55091,P97840               |
| 4104 | 1,3,5,7,18, 2,4,6,8,17,<br>19,22,23 20,21,24 | 3 D4A5U3,P02631,P19223                      |
| 4105 | 1,3,5,7,18, 2,4,6,8,17,<br>19,22,24 20,21,23 | 5 D4A5U3,P02631,P17559,P19223,P55091        |
| 4106 | 1,3,5,7,18, 2,4,6,8,17,<br>19,23,24 20,21,22 | 6 D4A5U3,P02631,P19223,P25809,P55091,P98089 |
| 4107 | 1,3,5,7,18, 2,4,6,8,17,<br>20,21,22 19,23,24 | 2 P47967,P97840                             |
| 4108 | 1,3,5,7,18, 2,4,6,8,17,<br>20,21,23 19,22,24 | 3 D3ZUC6,P47967,P97840                      |
| 4109 | 1,3,5,7,18, 2,4,6,8,17,<br>20,21,24 19,22,23 | 3 P47967,P97840,Q811M5                      |
| 4110 | 1,3,5,7,18, 2,4,6,8,17,<br>20,22,23 19,21,24 | 2 P97840,Q63474                             |

|      |                                              |                                                                                 |
|------|----------------------------------------------|---------------------------------------------------------------------------------|
| 4111 | 1,3,5,7,18, 2,4,6,8,17,<br>20,22,24 19,21,23 | 1 P97840                                                                        |
| 4112 | 1,3,5,7,18, 2,4,6,8,17,<br>20,23,24 19,21,22 | 0                                                                               |
| 4113 | 1,3,5,7,18, 2,4,6,8,17,<br>21,22,23 19,20,24 | 3 D4A5U3,P36374,Q68G31                                                          |
| 4114 | 1,3,5,7,18, 2,4,6,8,17,<br>21,22,24 19,20,23 | 2 P17559,P55091                                                                 |
| 4115 | 1,3,5,7,18, 2,4,6,8,17,<br>21,23,24 19,20,22 | 2 D4A5U3,O89117                                                                 |
| 4116 | 1,3,5,7,18, 2,4,6,8,17,<br>22,23,24 19,20,21 | 8 D4A5U3,P02631,P19223,P25809,P36374,P55091,P97675,Q6P6R2                       |
| 4117 | 1,3,5,7,19, 2,4,6,8,17,<br>20,21,22 18,23,24 | 4 P08649,P47967,P97840,Q5I0D1                                                   |
| 4118 | 1,3,5,7,19, 2,4,6,8,17,<br>20,21,23 18,22,24 | 5 D3ZUC6,P08649,P47967,P97840,Q5I0D1                                            |
| 4119 | 1,3,5,7,19, 2,4,6,8,17,<br>20,21,24 18,22,23 | 7 P08649,P47967,P97840,Q5I0D1,Q63532,Q6AY61,Q9WU74                              |
| 4120 | 1,3,5,7,19, 2,4,6,8,17,<br>20,22,23 18,21,24 | 2 P08649,P23739                                                                 |
| 4121 | 1,3,5,7,19, 2,4,6,8,17,<br>20,22,24 18,21,23 | 1 P08649                                                                        |
| 4122 | 1,3,5,7,19, 2,4,6,8,17,<br>20,23,24 18,21,22 | 2 P08649,P23739                                                                 |
| 4123 | 1,3,5,7,19, 2,4,6,8,17,<br>21,22,23 18,20,24 | 3 P08649,P12020,P55091                                                          |
| 4124 | 1,3,5,7,19, 2,4,6,8,17,<br>21,22,24 18,20,23 | 5 P08649,P12020,P17559,P19223,P55091                                            |
| 4125 | 1,3,5,7,19, 2,4,6,8,17,<br>21,23,24 18,20,22 | 6 P08649,P12020,P17559,P25809,P55091,Q9Z0J6                                     |
| 4126 | 1,3,5,7,19, 2,4,6,8,17,<br>22,23,24 18,20,21 | 11 D4A5U3,P02631,P08649,P12020,P17559,P19223,P22273,P25809,P55091,P98089,Q00715 |
| 4127 | 1,3,5,7,20, 2,4,6,8,17,<br>21,22,23 18,19,24 | 2 P08649,P97840                                                                 |
| 4128 | 1,3,5,7,20, 2,4,6,8,17,<br>21,22,24 18,19,23 | 2 P08649,P47967                                                                 |
| 4129 | 1,3,5,7,20, 2,4,6,8,17,<br>21,23,24 18,19,22 | 2 P08649,P23739                                                                 |
| 4130 | 1,3,5,7,20, 2,4,6,8,17,<br>22,23,24 18,19,21 | 2 P08649,P23739                                                                 |

|      |                                              |                                                                  |
|------|----------------------------------------------|------------------------------------------------------------------|
| 4131 | 1,3,5,7,21, 2,4,6,8,17,<br>22,23,24 18,19,20 | 8 D4A5U3,P08649,P12020,P19223,P25809,P50280,P55091,Q62714        |
| 4132 | 1,3,5,8,17, 2,4,6,7,21,<br>18,19,20 22,23,24 | 2 Q811M5,Q9R168                                                  |
| 4133 | 1,3,5,8,17, 2,4,6,7,20,<br>18,19,21 22,23,24 | 2 P22006,Q9QX74                                                  |
| 4134 | 1,3,5,8,17, 2,4,6,7,20,<br>18,19,22 21,23,24 | 1 P01835                                                         |
| 4135 | 1,3,5,8,17, 2,4,6,7,20,<br>18,19,23 21,22,24 | 2 P01835,P22006                                                  |
| 4136 | 1,3,5,8,17, 2,4,6,7,20,<br>18,19,24 21,22,23 | 1 P80299                                                         |
| 4137 | 1,3,5,8,17, 2,4,6,7,19,<br>18,20,21 22,23,24 | 1 Q811M5                                                         |
| 4138 | 1,3,5,8,17, 2,4,6,7,19,<br>18,20,22 21,23,24 | 1 P00714                                                         |
| 4139 | 1,3,5,8,17, 2,4,6,7,19,<br>18,20,23 21,22,24 | 4 P00714,P23739,P36376,Q9R168                                    |
| 4140 | 1,3,5,8,17, 2,4,6,7,19,<br>18,20,24 21,22,23 | 3 P80299,Q811M5,Q9R168                                           |
| 4141 | 1,3,5,8,17, 2,4,6,7,19,<br>18,21,22 20,23,24 | 0                                                                |
| 4142 | 1,3,5,8,17, 2,4,6,7,19,<br>18,21,23 20,22,24 | 1 P22006                                                         |
| 4143 | 1,3,5,8,17, 2,4,6,7,19,<br>18,21,24 20,22,23 | 4 P80299,Q6IFW6,Q80WL1,Q811M5                                    |
| 4144 | 1,3,5,8,17, 2,4,6,7,19,<br>18,22,23 20,21,24 | 4 P00714,P11598,P22283,Q63617                                    |
| 4145 | 1,3,5,8,17, 2,4,6,7,19,<br>18,22,24 20,21,23 | 3 P11598,P80299,Q63617                                           |
| 4146 | 1,3,5,8,17, 2,4,6,7,19,<br>18,23,24 20,21,22 | 5 P00714,P11598,P80299,Q63617,Q80WL1                             |
| 4147 | 1,3,5,8,17, 2,4,6,7,18,<br>19,20,21 22,23,24 | 9 BOLT89,D3ZUC6,P06760,P13676,P22006,Q6IMF3,Q6P6R2,Q811M5,Q9EQS0 |
| 4148 | 1,3,5,8,17, 2,4,6,7,18,<br>19,20,22 21,23,24 | 1 O89117                                                         |
| 4149 | 1,3,5,8,17, 2,4,6,7,18,<br>19,20,23 21,22,24 | 2 P23739,P36376                                                  |
| 4150 | 1,3,5,8,17, 2,4,6,7,18,<br>19,20,24 21,22,23 | 1 Q6IMF3                                                         |

|      |                                              |                                                                  |
|------|----------------------------------------------|------------------------------------------------------------------|
| 4151 | 1,3,5,8,17, 2,4,6,7,18,<br>19,21,22 20,23,24 | 3 P01946,P02091,Q9QYP1                                           |
| 4152 | 1,3,5,8,17, 2,4,6,7,18,<br>19,21,23 20,22,24 | 3 P22006,Q80WL1,Q9Z0J6                                           |
| 4153 | 1,3,5,8,17, 2,4,6,7,18,<br>19,21,24 20,22,23 | 5 P80299,Q4FZU2,Q6IFW6,Q6IMF3,Q80WL1                             |
| 4154 | 1,3,5,8,17, 2,4,6,7,18,<br>19,22,23 20,21,24 | 4 P01681,P02091,P11598,Q80WL1                                    |
| 4155 | 1,3,5,8,17, 2,4,6,7,18,<br>19,22,24 20,21,23 | 3 P02091,P11598,Q80WL1                                           |
| 4156 | 1,3,5,8,17, 2,4,6,7,18,<br>19,23,24 20,21,22 | 5 O55145,P11598,P80299,Q80WL1,Q9Z0J6                             |
| 4157 | 1,3,5,8,17, 2,4,6,7,18,<br>20,21,22 19,23,24 | 1 P20766                                                         |
| 4158 | 1,3,5,8,17, 2,4,6,7,18,<br>20,21,23 19,22,24 | 5 P19132,P22006,P23739,Q6IFW6,Q6IMF3                             |
| 4159 | 1,3,5,8,17, 2,4,6,7,18,<br>20,21,24 19,22,23 | 9 P80299,Q4FZU2,Q6IFW6,Q6IG02,Q6IMF3,Q6P6Q2,Q80WL1,Q811M5,Q9EQS0 |
| 4160 | 1,3,5,8,17, 2,4,6,7,18,<br>20,22,23 19,21,24 | 3 P00714,P23739,P36376                                           |
| 4161 | 1,3,5,8,17, 2,4,6,7,18,<br>20,22,24 19,21,23 | 0                                                                |
| 4162 | 1,3,5,8,17, 2,4,6,7,18,<br>20,23,24 19,21,22 | 5 P23739,P80299,Q6IFW6,Q6IMF3,Q80WL1                             |
| 4163 | 1,3,5,8,17, 2,4,6,7,18,<br>21,22,23 19,20,24 | 2 P11598,Q80WL1                                                  |
| 4164 | 1,3,5,8,17, 2,4,6,7,18,<br>21,22,24 19,20,23 | 3 P80299,Q6IFW6,Q80WL1                                           |
| 4165 | 1,3,5,8,17, 2,4,6,7,18,<br>21,23,24 19,20,22 | 5 P80299,Q4FZU2,Q6IFW6,Q6IMF3,Q80WL1                             |
| 4166 | 1,3,5,8,17, 2,4,6,7,18,<br>22,23,24 19,20,21 | 7 P00714,P11598,P22283,P62804,Q00715,Q63617,Q80WL1               |
| 4167 | 1,3,5,8,18, 2,4,6,7,17,<br>19,20,21 22,23,24 | 5 D3ZUC6,P01039,P47967,Q5I0D1,Q9R168                             |
| 4168 | 1,3,5,8,18, 2,4,6,7,17,<br>19,20,22 21,23,24 | 2 P01039,Q9R168                                                  |
| 4169 | 1,3,5,8,18, 2,4,6,7,17,<br>19,20,23 21,22,24 | 3 P01039,P23739,Q9R168                                           |
| 4170 | 1,3,5,8,18, 2,4,6,7,17,<br>19,20,24 21,22,23 | 1 Q9R168                                                         |

|      |                                              |                                                           |
|------|----------------------------------------------|-----------------------------------------------------------|
| 4171 | 1,3,5,8,18, 2,4,6,7,17,<br>19,21,22 20,23,24 | 1 Q9QYP1                                                  |
| 4172 | 1,3,5,8,18, 2,4,6,7,17,<br>19,21,23 20,22,24 | 4 O35077,P01039,P22006,Q9Z0J6                             |
| 4173 | 1,3,5,8,18, 2,4,6,7,17,<br>19,21,24 20,22,23 | 2 P55091,P80299                                           |
| 4174 | 1,3,5,8,18, 2,4,6,7,17,<br>19,22,23 20,21,24 | 3 P01039,P19223,Q9Z0J6                                    |
| 4175 | 1,3,5,8,18, 2,4,6,7,17,<br>19,22,24 20,21,23 | 2 P19223,P55091                                           |
| 4176 | 1,3,5,8,18, 2,4,6,7,17,<br>19,23,24 20,21,22 | 3 P19223,P55091,Q9Z0J6                                    |
| 4177 | 1,3,5,8,18, 2,4,6,7,17,<br>20,21,22 19,23,24 | 1 P01039                                                  |
| 4178 | 1,3,5,8,18, 2,4,6,7,17,<br>20,21,23 19,22,24 | 3 D3ZUC6,P01039,Q9R168                                    |
| 4179 | 1,3,5,8,18, 2,4,6,7,17,<br>20,21,24 19,22,23 | 4 P80299,Q6IFW6,Q811M5,Q9R168                             |
| 4180 | 1,3,5,8,18, 2,4,6,7,17,<br>20,22,23 19,21,24 | 3 P00714,P01039,Q9R168                                    |
| 4181 | 1,3,5,8,18, 2,4,6,7,17,<br>20,22,24 19,21,23 | 1 Q9R168                                                  |
| 4182 | 1,3,5,8,18, 2,4,6,7,17,<br>20,23,24 19,21,22 | 3 P23739,Q5QE79,Q9R168                                    |
| 4183 | 1,3,5,8,18, 2,4,6,7,17,<br>21,22,23 19,20,24 | 2 P01039,P54921                                           |
| 4184 | 1,3,5,8,18, 2,4,6,7,17,<br>21,22,24 19,20,23 | 1 P55091                                                  |
| 4185 | 1,3,5,8,18, 2,4,6,7,17,<br>21,23,24 19,20,22 | 4 O89117,P80299,Q80WL1,Q9Z0J6                             |
| 4186 | 1,3,5,8,18, 2,4,6,7,17,<br>22,23,24 19,20,21 | 9 P00714,P11598,P19223,P36374,P55091,P62804,Q6P6R2,Q9R0T3 |
| 4187 | 1,3,5,8,19, 2,4,6,7,17,<br>20,21,22 18,23,24 | 3 O88797,P01039,P19218                                    |
| 4188 | 1,3,5,8,19, 2,4,6,7,17,<br>20,21,23 18,22,24 | 3 D3ZUC6,P01039,P23739                                    |
| 4189 | 1,3,5,8,19, 2,4,6,7,17,<br>20,21,24 18,22,23 | 3 Q6IFW6,Q6IMF3,Q9EQS0                                    |
| 4190 | 1,3,5,8,19, 2,4,6,7,17,<br>20,22,23 18,21,24 | 4 P01039,P19218,P23739,Q9WVH8                             |

|      |                                              |                                                                                                                                         |
|------|----------------------------------------------|-----------------------------------------------------------------------------------------------------------------------------------------|
| 4191 | 1,3,5,8,19, 2,4,6,7,17,<br>20,22,24 18,21,23 | 0                                                                                                                                       |
| 4192 | 1,3,5,8,19, 2,4,6,7,17,<br>20,23,24 18,21,22 | 2 P23739,Q80WL1                                                                                                                         |
| 4193 | 1,3,5,8,19, 2,4,6,7,17,<br>21,22,23 18,20,24 | 6 O35077,P01039,P19223,P55091,Q80WL1,Q9Z0J6                                                                                             |
| 4194 | 1,3,5,8,19, 2,4,6,7,17,<br>21,22,24 18,20,23 | 4 P19223,P30919,P55091,Q80WL1                                                                                                           |
| 4195 | 1,3,5,8,19, 2,4,6,7,17,<br>21,23,24 18,20,22 | 4 P19223,P55091,Q80WL1,Q9Z0J6                                                                                                           |
| 4196 | 1,3,5,8,19, 2,4,6,7,17,<br>22,23,24 18,20,21 | 8 P00507,P11598,P19223,P25809,P55091,Q00715,Q80WL1,Q9Z0J6                                                                               |
| 4197 | 1,3,5,8,20, 2,4,6,7,17,<br>21,22,23 18,19,24 | 2 P01039,P23739                                                                                                                         |
| 4198 | 1,3,5,8,20, 2,4,6,7,17,<br>21,22,24 18,19,23 | 1 Q6IFW6                                                                                                                                |
| 4199 | 1,3,5,8,20, 2,4,6,7,17,<br>21,23,24 18,19,22 | 5 P08649,P23739,Q6IFW6,Q6IMF3,Q80WL1                                                                                                    |
| 4200 | 1,3,5,8,20, 2,4,6,7,17,<br>22,23,24 18,19,21 | 4 P23739,Q00715,Q5QE79,Q80WL1                                                                                                           |
| 4201 | 1,3,5,8,21, 2,4,6,7,17,<br>22,23,24 18,19,20 | 6 P11598,P19223,P30919,P55091,Q62714,Q80WL1                                                                                             |
| 4202 | 1,3,5,17,1 2,4,6,7,8,2<br>8,19,20,21 2,23,24 | 5 B0LT89,O54858,P20761,Q63532,Q6P6R2                                                                                                    |
| 4203 | 1,3,5,17,1 2,4,6,7,8,2<br>8,19,20,22 1,23,24 | 6 O54858,P00714,P02631,P20761,Q63474,Q63532                                                                                             |
| 4204 | 1,3,5,17,1 2,4,6,7,8,2<br>8,19,20,23 1,22,24 | 4 O54858,P00714,P02631,Q99041                                                                                                           |
| 4205 | 1,3,5,17,1 2,4,6,7,8,2<br>8,19,20,24 1,22,23 | 5 O54858,P02631,P20761,Q63532,Q99041                                                                                                    |
| 4206 | 1,3,5,17,1 2,4,6,7,8,2<br>8,19,21,22 0,23,24 | 7 P01946,P02091,P12020,P20761,P22273,P50280,Q4G075                                                                                      |
| 4207 | 1,3,5,17,1 2,4,6,7,8,2<br>8,19,21,23 0,22,24 | 7 P02780,P12020,P22006,P22273,P50280,Q4G075,Q99041                                                                                      |
| 4208 | 1,3,5,17,1 2,4,6,7,8,2<br>8,19,21,24 0,22,23 | 8 O54858,P12020,P20761,P22273,P50280,Q4G075,Q63532,Q99041                                                                               |
| 4209 | 1,3,5,17,1 2,4,6,7,8,2<br>8,19,22,23 0,21,24 | 19 D4A5U3,P00714,P02091,P02631,P02780,P06761,P08723,P09456,P11598,P12020,P16228,P22273,P22282,P50280,Q00715,Q4G075,Q5M8C6,Q63617,Q812E4 |
| 4210 | 1,3,5,17,1 2,4,6,7,8,2<br>8,19,22,24 0,21,23 | 10 D4A5U3,P00714,P02631,P02780,P11598,P20761,P22273,P50280,Q4G075,Q63617                                                                |

|      |                                              |    |                                                                                                                                                                         |
|------|----------------------------------------------|----|-------------------------------------------------------------------------------------------------------------------------------------------------------------------------|
| 4211 | 1,3,5,17,1 2,4,6,7,8,2<br>8,19,23,24 0,21,22 | 12 | D4A5U3,P00714,P02631,P02780,P11598,P12020,P22273,P22282,P50280,Q4G075,Q63617,Q99041                                                                                     |
| 4212 | 1,3,5,17,1 2,4,6,7,8,1<br>8,20,21,22 9,23,24 | 3  | O54858,P00714,P20761                                                                                                                                                    |
| 4213 | 1,3,5,17,1 2,4,6,7,8,1<br>8,20,21,23 9,22,24 | 3  | O54858,P00714,Q99041                                                                                                                                                    |
| 4214 | 1,3,5,17,1 2,4,6,7,8,1<br>8,20,21,24 9,22,23 | 6  | O54858,P20761,P42854,Q63532,Q811M5,Q99041                                                                                                                               |
| 4215 | 1,3,5,17,1 2,4,6,7,8,1<br>8,20,22,23 9,21,24 | 5  | P00714,P02631,P22282,Q63474,Q63617                                                                                                                                      |
| 4216 | 1,3,5,17,1 2,4,6,7,8,1<br>8,20,22,24 9,21,23 | 5  | P00714,P02631,P20761,P22282,P50115                                                                                                                                      |
| 4217 | 1,3,5,17,1 2,4,6,7,8,1<br>8,20,23,24 9,21,22 | 5  | P00714,P02631,P22282,P23739,Q99041                                                                                                                                      |
| 4218 | 1,3,5,17,1 2,4,6,7,8,1<br>8,21,22,23 9,20,24 | 18 | D4A5U3,P00714,P02780,P06761,P08723,P0C0A9,P11598,P12020,P22273,P22282,P36374,P46462,P50280,P82471,Q4G075,Q63617,Q6TMA8,Q9R0T3                                           |
| 4219 | 1,3,5,17,1 2,4,6,7,8,1<br>8,21,22,24 9,20,23 | 11 | D4A5U3,P02780,P10758,P11598,P12020,P22273,P22282,P42854,P50280,Q4G075,Q63617                                                                                            |
| 4220 | 1,3,5,17,1 2,4,6,7,8,1<br>8,21,23,24 9,20,22 | 12 | D4A5U3,P00714,P02780,P06761,P11598,P12020,P22273,P22282,P50280,Q4G075,Q63617,Q99041                                                                                     |
| 4221 | 1,3,5,17,1 2,4,6,7,8,1<br>8,22,23,24 9,20,21 | 24 | D4A5U3,P00714,P02631,P02780,P06761,P0C0A9,P11598,P12020,P22273,P22282,P22283,P36374,P46462,P50280,P62804,Q00715,Q4G075,Q5M8C6,Q63617,Q812E4,Q99041,Q9J185,Q9R0T3,Q9WTT6 |
| 4222 | 1,3,5,17,1 2,4,6,7,8,1<br>9,20,21,22 8,23,24 | 6  | O54858,P01946,P02091,P20761,P20762,Q3ZAV1                                                                                                                               |
| 4223 | 1,3,5,17,1 2,4,6,7,8,1<br>9,20,21,23 8,22,24 | 4  | O54858,P20762,P23739,Q99041                                                                                                                                             |
| 4224 | 1,3,5,17,1 2,4,6,7,8,1<br>9,20,21,24 8,22,23 | 7  | O54858,P20761,P20762,P54921,Q63532,Q6AY61,Q99041                                                                                                                        |
| 4225 | 1,3,5,17,1 2,4,6,7,8,1<br>9,20,22,23 8,21,24 | 6  | O55004,P00714,P02091,P02631,P23739,Q00715                                                                                                                               |
| 4226 | 1,3,5,17,1 2,4,6,7,8,1<br>9,20,22,24 8,21,23 | 5  | P02631,P20761,P20762,Q00715,Q63532                                                                                                                                      |
| 4227 | 1,3,5,17,1 2,4,6,7,8,1<br>9,20,23,24 8,21,22 | 4  | P02631,P23739,Q00715,Q99041                                                                                                                                             |
| 4228 | 1,3,5,17,1 2,4,6,7,8,1<br>9,21,22,23 8,20,24 | 12 | O55004,P01946,P02091,P02780,P06911,P11598,P12020,P22273,P22282,P50280,Q4G075,Q5GRG2                                                                                     |
| 4229 | 1,3,5,17,1 2,4,6,7,8,1<br>9,21,22,24 8,20,23 | 10 | P01946,P02091,P11598,P12020,P17559,P20762,P22273,P50280,Q4G075,Q80WL1                                                                                                   |
| 4230 | 1,3,5,17,1 2,4,6,7,8,1<br>9,21,23,24 8,20,22 | 10 | P02780,P06911,P11598,P12020,P22273,P50280,Q4G075,Q5GRG2,Q80WL1,Q99041                                                                                                   |



|      |                                              |    |                                                                                                                                                                         |
|------|----------------------------------------------|----|-------------------------------------------------------------------------------------------------------------------------------------------------------------------------|
| 4231 | 1,3,5,17,1 2,4,6,7,8,1<br>9,22,23,24 8,20,21 | 20 | D4A5U3,O55004,P00714,P01946,P02091,P02631,P02780,P06761,P11598,P12020,P22273,P22282,P25809,P50280,P62804,Q00715,Q4G075,Q5GRG2,Q63617,Q80WL1                             |
| 4232 | 1,3,5,17,2 2,4,6,7,8,1<br>0,21,22,23 8,19,24 | 3  | P00714,P20766,P22282                                                                                                                                                    |
| 4233 | 1,3,5,17,2 2,4,6,7,8,1<br>0,21,22,24 8,19,23 | 3  | P20761,P20762,P20766                                                                                                                                                    |
| 4234 | 1,3,5,17,2 2,4,6,7,8,1<br>0,21,23,24 8,19,22 | 3  | P20762,P23739,Q99041                                                                                                                                                    |
| 4235 | 1,3,5,17,2 2,4,6,7,8,1<br>0,22,23,24 8,19,21 | 12 | O55004,P00714,P02631,P06761,P07150,P11598,P22273,P22282,P23739,P62804,Q00715,Q66H69                                                                                     |
| 4236 | 1,3,5,17,2 2,4,6,7,8,1<br>1,22,23,24 8,19,20 | 19 | D4A5U3,O55004,P00714,P01946,P02780,P06761,P06911,P07150,P0C0A9,P11598,P12020,P22273,P22282,P50280,Q4G075,Q5GRG2,Q63617,Q80WL1,Q9R0T3                                    |
| 4237 | 1,3,5,18,1 2,4,6,7,8,1<br>9,20,21,22 7,23,24 | 4  | P01039,P20761,P47967,P97840                                                                                                                                             |
| 4238 | 1,3,5,18,1 2,4,6,7,8,1<br>9,20,21,23 7,22,24 | 3  | O54858,P01039,P23593                                                                                                                                                    |
| 4239 | 1,3,5,18,1 2,4,6,7,8,1<br>9,20,21,24 7,22,23 | 3  | O54858,P20761,Q63532                                                                                                                                                    |
| 4240 | 1,3,5,18,1 2,4,6,7,8,1<br>9,20,22,23 7,21,24 | 5  | P00714,P01039,P02631,P36860,Q63474                                                                                                                                      |
| 4241 | 1,3,5,18,1 2,4,6,7,8,1<br>9,20,22,24 7,21,23 | 4  | P02631,P20761,P50115,Q63474                                                                                                                                             |
| 4242 | 1,3,5,18,1 2,4,6,7,8,1<br>9,20,23,24 7,21,22 | 3  | P02631,P23739,Q99041                                                                                                                                                    |
| 4243 | 1,3,5,18,1 2,4,6,7,8,1<br>9,21,22,23 7,20,24 | 12 | D4A5U3,P01039,P02780,P06911,P12020,P19223,P22273,P22282,P50280,P55091,Q4G075,Q5GRG2                                                                                     |
| 4244 | 1,3,5,18,1 2,4,6,7,8,1<br>9,21,22,24 7,20,23 | 9  | D4A5U3,P06911,P12020,P17559,P19223,P22273,P55091,Q4G075,Q5GRG2                                                                                                          |
| 4245 | 1,3,5,18,1 2,4,6,7,8,1<br>9,21,23,24 7,20,22 | 13 | D4A5U3,P02780,P06911,P12020,P17559,P19223,P22273,P50280,P55091,Q4G075,Q5GRG2,Q99041,Q9Z0J6                                                                              |
| 4246 | 1,3,5,18,1 2,4,6,7,8,1<br>9,22,23,24 7,20,21 | 24 | D4A5U3,P00714,P02631,P02780,P06761,P06911,P11598,P12020,P13676,P17559,P19223,P22273,P22282,P25809,P50280,P55091,P62804,P98089,Q00715,Q4G075,Q5GRG2,Q63617,Q9R0T3,Q9WTT6 |
| 4247 | 1,3,5,18,2 2,4,6,7,8,1<br>0,21,22,23 7,19,24 | 4  | P00714,P01039,P22282,P50115                                                                                                                                             |
| 4248 | 1,3,5,18,2 2,4,6,7,8,1<br>0,21,22,24 7,19,23 | 2  | P20761,P50115                                                                                                                                                           |
| 4249 | 1,3,5,18,2 2,4,6,7,8,1<br>0,21,23,24 7,19,22 | 2  | P50115,Q99041                                                                                                                                                           |
| 4250 | 1,3,5,18,2 2,4,6,7,8,1<br>0,22,23,24 7,19,21 | 12 | P00714,P02631,P06761,P07150,P20646,P22282,P50115,P62804,Q00715,Q5QE79,Q66H69,Q9QX74                                                                                     |

|      |                          |                          |                                                                                                                                                                                    |
|------|--------------------------|--------------------------|------------------------------------------------------------------------------------------------------------------------------------------------------------------------------------|
| 4251 | 1,3,5,18,2<br>1,22,23,24 | 2,4,6,7,8,1<br>7,19,20   | D4A5U3,P00714,P02780,P06761,P06911,P07150,P11598,P12020,P13676,P19223,P20646,P2227<br>24 3,P22282,P36374,P46462,P50115,P50280,P55091,Q4G075,Q5GRG2,Q63617,Q6TMA8,Q9ROT3,<br>Q9WTT6 |
| 4252 | 1,3,5,19,2<br>0,21,22,23 | 2,4,6,7,8,1<br>7,18,24   | 2 P01039,P08649                                                                                                                                                                    |
| 4253 | 1,3,5,19,2<br>0,21,22,24 | 2,4,6,7,8,1<br>7,18,23   | 3 O70594,P08649,P20762                                                                                                                                                             |
| 4254 | 1,3,5,19,2<br>0,21,23,24 | 2,4,6,7,8,1<br>7,18,22   | 3 P08649,P23739,Q99041                                                                                                                                                             |
| 4255 | 1,3,5,19,2<br>0,22,23,24 | 2,4,6,7,8,1<br>7,18,21   | 8 P02631,P22273,P23739,P62804,Q00715,Q9QX74,Q9WVH8,Q9Z1F2                                                                                                                          |
| 4256 | 1,3,5,19,2<br>1,22,23,24 | 2,4,6,7,8,1<br>7,18,20   | 20 D4A5U3,P02454,P02631,P02780,P06761,P06911,P08649,P11598,P12020,P17559,P19223,P2227<br>3,P22282,P25809,P50280,P55091,Q4G075,Q5GRG2,Q80WL1,Q9Z0J6                                 |
| 4257 | 1,3,5,20,2<br>1,22,23,24 | 2,4,6,7,8,1<br>7,18,19   | 5 P07150,P08649,P20766,P22282,P50115                                                                                                                                               |
| 4258 | 1,3,6,7,8,1<br>7,18,19   | 2,4,5,20,2<br>1,22,23,24 | 2 P21674,P70549                                                                                                                                                                    |
| 4259 | 1,3,6,7,8,1<br>7,18,20   | 2,4,5,19,2<br>1,22,23,24 | 5 O70417,P06911,P12020,P13432,Q5GRG2                                                                                                                                               |
| 4260 | 1,3,6,7,8,1<br>7,18,21   | 2,4,5,19,2<br>0,22,23,24 | 2 P05539,Q9QX74                                                                                                                                                                    |
| 4261 | 1,3,6,7,8,1<br>7,18,22   | 2,4,5,19,2<br>0,21,23,24 | 4 O70417,P01946,P02091,P35280                                                                                                                                                      |
| 4262 | 1,3,6,7,8,1<br>7,18,23   | 2,4,5,19,2<br>0,21,22,24 | 3 O70594,P21674,Q63598                                                                                                                                                             |
| 4263 | 1,3,6,7,8,1<br>7,18,24   | 2,4,5,19,2<br>0,21,22,23 | 1 Q63598                                                                                                                                                                           |
| 4264 | 1,3,6,7,8,1<br>7,19,20   | 2,4,5,18,2<br>1,22,23,24 | 8 O70417,O89117,P06911,P13676,Q5GRG2,Q9JI85,Q9QW07,Q9WTT6                                                                                                                          |
| 4265 | 1,3,6,7,8,1<br>7,19,21   | 2,4,5,18,2<br>0,22,23,24 | 5 P05539,P21674,Q5QE79,Q63493,Q9QX74                                                                                                                                               |
| 4266 | 1,3,6,7,8,1<br>7,19,22   | 2,4,5,18,2<br>0,21,23,24 | 7 O70417,O89117,P01946,P02091,P35280,P70549,Q9QZK9                                                                                                                                 |
| 4267 | 1,3,6,7,8,1<br>7,19,23   | 2,4,5,18,2<br>0,21,22,24 | 2 P21674,P70549                                                                                                                                                                    |
| 4268 | 1,3,6,7,8,1<br>7,19,24   | 2,4,5,18,2<br>0,21,22,23 | 1 P70549                                                                                                                                                                           |
| 4269 | 1,3,6,7,8,1<br>7,20,21   | 2,4,5,18,1<br>9,22,23,24 | 10 P05539,P06911,P13676,P19629,P22283,Q5GRG2,Q5RKI1,Q63493,Q9JI85,Q9WTT6                                                                                                           |
| 4270 | 1,3,6,7,8,1<br>7,20,22   | 2,4,5,18,1<br>9,21,23,24 | 9 O70417,O89117,P01946,P02091,P06911,P12020,P19629,P35280,Q5GRG2                                                                                                                   |

|      |                        |                          |   |                                                                |
|------|------------------------|--------------------------|---|----------------------------------------------------------------|
| 4271 | 1,3,6,7,8,1<br>7,20,23 | 2,4,5,18,1<br>9,21,22,24 | 4 | O70417,P06911,P19629,Q5GRG2                                    |
| 4272 | 1,3,6,7,8,1<br>7,20,24 | 2,4,5,18,1<br>9,21,22,23 | 5 | O70417,P06911,Q5GRG2,Q9JHB9,Q9QW07                             |
| 4273 | 1,3,6,7,8,1<br>7,21,22 | 2,4,5,18,1<br>9,20,23,24 | 4 | P01946,P02091,P05539,P35280                                    |
| 4274 | 1,3,6,7,8,1<br>7,21,23 | 2,4,5,18,1<br>9,20,22,24 | 1 | P21674                                                         |
| 4275 | 1,3,6,7,8,1<br>7,21,24 | 2,4,5,18,1<br>9,20,22,23 | 2 | P04762,P05539                                                  |
| 4276 | 1,3,6,7,8,1<br>7,22,23 | 2,4,5,18,1<br>9,20,21,24 | 4 | P01946,P02091,P02783,P35280                                    |
| 4277 | 1,3,6,7,8,1<br>7,22,24 | 2,4,5,18,1<br>9,20,21,23 | 5 | O70417,P01946,P02091,P35280,P70549                             |
| 4278 | 1,3,6,7,8,1<br>7,23,24 | 2,4,5,18,1<br>9,20,21,22 | 2 | P70549,Q63598                                                  |
| 4279 | 1,3,6,7,8,1<br>8,19,20 | 2,4,5,17,2<br>1,22,23,24 | 9 | P06911,P12020,P19629,P31044,Q5GRG2,Q63617,Q9JH85,Q9QW07,Q9R168 |
| 4280 | 1,3,6,7,8,1<br>8,19,21 | 2,4,5,17,2<br>0,22,23,24 | 3 | P08937,P20759,Q63751                                           |
| 4281 | 1,3,6,7,8,1<br>8,19,22 | 2,4,5,17,2<br>0,21,23,24 | 1 | P35280                                                         |
| 4282 | 1,3,6,7,8,1<br>8,19,23 | 2,4,5,17,2<br>0,21,22,24 | 2 | P21674,Q9Z0J6                                                  |
| 4283 | 1,3,6,7,8,1<br>8,19,24 | 2,4,5,17,2<br>0,21,22,23 | 1 | P70549                                                         |
| 4284 | 1,3,6,7,8,1<br>8,20,21 | 2,4,5,17,1<br>9,22,23,24 | 7 | P06911,P19629,P22283,P47967,Q5GRG2,Q5RKI1,Q9QW07               |
| 4285 | 1,3,6,7,8,1<br>8,20,22 | 2,4,5,17,1<br>9,21,23,24 | 7 | O70417,P06911,P12020,P19629,P35280,Q5GRG2,Q9QW07               |
| 4286 | 1,3,6,7,8,1<br>8,20,23 | 2,4,5,17,1<br>9,21,22,24 | 5 | P06911,P19629,Q62894,Q9QW07,Q9R168                             |
| 4287 | 1,3,6,7,8,1<br>8,20,24 | 2,4,5,17,1<br>9,21,22,23 | 6 | P06911,P12020,Q5GRG2,Q9JHB9,Q9QW07,Q9R168                      |
| 4288 | 1,3,6,7,8,1<br>8,21,22 | 2,4,5,17,1<br>9,20,23,24 | 2 | P23739,P35280                                                  |
| 4289 | 1,3,6,7,8,1<br>8,21,23 | 2,4,5,17,1<br>9,20,22,24 | 0 |                                                                |
| 4290 | 1,3,6,7,8,1<br>8,21,24 | 2,4,5,17,1<br>9,20,22,23 | 1 | P02625                                                         |

|      |                        |                          |                                                                                                                                                                   |                                                                       |
|------|------------------------|--------------------------|-------------------------------------------------------------------------------------------------------------------------------------------------------------------|-----------------------------------------------------------------------|
| 4291 | 1,3,6,7,8,1<br>8,22,23 | 2,4,5,17,1<br>9,20,21,24 | 2                                                                                                                                                                 | P02783,P35280                                                         |
| 4292 | 1,3,6,7,8,1<br>8,22,24 | 2,4,5,17,1<br>9,20,21,23 | 1                                                                                                                                                                 | P35280                                                                |
| 4293 | 1,3,6,7,8,1<br>8,23,24 | 2,4,5,17,1<br>9,20,21,22 | 2                                                                                                                                                                 | Q3ZAV1,Q63598                                                         |
| 4294 | 1,3,6,7,8,1<br>9,20,21 | 2,4,5,17,1<br>8,22,23,24 | iRT-<br>20 Kit_WR_fusion,P02780,P05369,P06761,P06911,P08723,P08937,P19629,P20759,P22283,P24368,<br>P46462,P47967,Q5I0D1,Q5RKI1,Q63493,Q63617,Q812E4,Q9JI85,Q9QW07 |                                                                       |
| 4295 | 1,3,6,7,8,1<br>9,20,22 | 2,4,5,17,1<br>8,21,23,24 | 6                                                                                                                                                                 | P06911,P19218,P19629,P35280,Q9QW07,Q9QZK9                             |
| 4296 | 1,3,6,7,8,1<br>9,20,23 | 2,4,5,17,1<br>8,21,22,24 | 4                                                                                                                                                                 | P06911,P19629,Q812E4,Q9QW07                                           |
| 4297 | 1,3,6,7,8,1<br>9,20,24 | 2,4,5,17,1<br>8,21,22,23 | 8                                                                                                                                                                 | P06911,P08723,Q63617,Q812E4,Q9JHB9,Q9JI85,Q9QW07,Q9QZK9               |
| 4298 | 1,3,6,7,8,1<br>9,21,22 | 2,4,5,17,1<br>8,20,23,24 | 5                                                                                                                                                                 | iRT-Kit_WR_fusion,P01946,P02091,P08937,P35280                         |
| 4299 | 1,3,6,7,8,1<br>9,21,23 | 2,4,5,17,1<br>8,20,22,24 | 5                                                                                                                                                                 | iRT-Kit_WR_fusion,P02783,P19629,P21674,Q9Z0J6                         |
| 4300 | 1,3,6,7,8,1<br>9,21,24 | 2,4,5,17,1<br>8,20,22,23 | 0                                                                                                                                                                 |                                                                       |
| 4301 | 1,3,6,7,8,1<br>9,22,23 | 2,4,5,17,1<br>8,20,21,24 | 6                                                                                                                                                                 | P01946,P02091,P02783,P19223,P35280,P70549                             |
| 4302 | 1,3,6,7,8,1<br>9,22,24 | 2,4,5,17,1<br>8,20,21,23 | 4                                                                                                                                                                 | P19223,P35280,P70549,Q9QZK9                                           |
| 4303 | 1,3,6,7,8,1<br>9,23,24 | 2,4,5,17,1<br>8,20,21,22 | 4                                                                                                                                                                 | P19223,P25809,P70549,Q9Z0J6                                           |
| 4304 | 1,3,6,7,8,2<br>0,21,22 | 2,4,5,17,1<br>8,19,23,24 | 5                                                                                                                                                                 | P06911,P19629,P35280,Q5RKI1,Q9QW07                                    |
| 4305 | 1,3,6,7,8,2<br>0,21,23 | 2,4,5,17,1<br>8,19,22,24 | 6                                                                                                                                                                 | P02783,P09656,P19629,Q5RKI1,Q812E4,Q9QW07                             |
| 4306 | 1,3,6,7,8,2<br>0,21,24 | 2,4,5,17,1<br>8,19,22,23 | 10                                                                                                                                                                | P02782,P04762,P06911,P08723,P19629,P22283,Q5RKI1,Q812E4,Q9JHB9,Q9QW07 |
| 4307 | 1,3,6,7,8,2<br>0,22,23 | 2,4,5,17,1<br>8,19,21,24 | 6                                                                                                                                                                 | P02783,P06911,P09656,P19629,P35280,Q62894                             |
| 4308 | 1,3,6,7,8,2<br>0,22,24 | 2,4,5,17,1<br>8,19,21,23 | 5                                                                                                                                                                 | P06911,P19629,P22006,P35280,Q9QW07                                    |
| 4309 | 1,3,6,7,8,2<br>0,23,24 | 2,4,5,17,1<br>8,19,21,22 | 5                                                                                                                                                                 | P06911,P19629,Q62894,Q812E4,Q9QW07                                    |
| 4310 | 1,3,6,7,8,2<br>1,22,23 | 2,4,5,17,1<br>8,19,20,24 | 6                                                                                                                                                                 | P02783,P09656,P13265,P19629,P35280,Q62714                             |

|      |                         |                          |   |                                           |
|------|-------------------------|--------------------------|---|-------------------------------------------|
| 4311 | 1,3,6,7,8,2<br>1,22,24  | 2,4,5,17,1<br>8,19,20,23 | 2 | P35280,Q62714                             |
| 4312 | 1,3,6,7,8,2<br>1,23,24  | 2,4,5,17,1<br>8,19,20,22 | 2 | P09656,Q62714                             |
| 4313 | 1,3,6,7,8,2<br>2,23,24  | 2,4,5,17,1<br>8,19,20,21 | 6 | P02783,P19223,P25809,P35280,Q62714,Q6P6R2 |
| 4314 | 1,3,6,7,17,<br>18,19,20 | 2,4,5,8,21,<br>22,23,24  | 1 | P30919                                    |
| 4315 | 1,3,6,7,17,<br>18,19,21 | 2,4,5,8,20,<br>22,23,24  | 3 | P05539,P23739,Q5QE79                      |
| 4316 | 1,3,6,7,17,<br>18,19,22 | 2,4,5,8,20,<br>21,23,24  | 3 | P01946,P02091,P70549                      |
| 4317 | 1,3,6,7,17,<br>18,19,23 | 2,4,5,8,20,<br>21,22,24  | 2 | P21674,P70549                             |
| 4318 | 1,3,6,7,17,<br>18,19,24 | 2,4,5,8,20,<br>21,22,23  | 1 | P70549                                    |
| 4319 | 1,3,6,7,17,<br>18,20,21 | 2,4,5,8,19,<br>22,23,24  | 2 | P00507,P05539                             |
| 4320 | 1,3,6,7,17,<br>18,20,22 | 2,4,5,8,19,<br>21,23,24  | 2 | P01946,P02091                             |
| 4321 | 1,3,6,7,17,<br>18,20,23 | 2,4,5,8,19,<br>21,22,24  | 1 | P30919                                    |
| 4322 | 1,3,6,7,17,<br>18,20,24 | 2,4,5,8,19,<br>21,22,23  | 0 |                                           |
| 4323 | 1,3,6,7,17,<br>18,21,22 | 2,4,5,8,19,<br>20,23,24  | 4 | P01946,P02091,P05539,P23739               |
| 4324 | 1,3,6,7,17,<br>18,21,23 | 2,4,5,8,19,<br>20,22,24  | 1 | P05539                                    |
| 4325 | 1,3,6,7,17,<br>18,21,24 | 2,4,5,8,19,<br>20,22,23  | 2 | P04762,P05539                             |
| 4326 | 1,3,6,7,17,<br>18,22,23 | 2,4,5,8,19,<br>20,21,24  | 3 | P01946,P02091,P02783                      |
| 4327 | 1,3,6,7,17,<br>18,22,24 | 2,4,5,8,19,<br>20,21,23  | 4 | P01946,P02091,P70549,Q8CJD3               |
| 4328 | 1,3,6,7,17,<br>18,23,24 | 2,4,5,8,19,<br>20,21,22  | 1 | P70549                                    |
| 4329 | 1,3,6,7,17,<br>19,20,21 | 2,4,5,8,18,<br>22,23,24  | 5 | P05539,P20762,P22283,Q63617,Q6P6R2        |
| 4330 | 1,3,6,7,17,<br>19,20,22 | 2,4,5,8,18,<br>21,23,24  | 4 | O89117,P01946,P02091,P70549               |

|      |                                              |                                             |
|------|----------------------------------------------|---------------------------------------------|
| 4331 | 1,3,6,7,17, 2,4,5,8,18,<br>19,20,23 21,22,24 | 1 P70549                                    |
| 4332 | 1,3,6,7,17, 2,4,5,8,18,<br>19,20,24 21,22,23 | 2 P54921,P70549                             |
| 4333 | 1,3,6,7,17, 2,4,5,8,18,<br>19,21,22 20,23,24 | 5 P01946,P02091,P05539,Q5QE79,Q9R168        |
| 4334 | 1,3,6,7,17, 2,4,5,8,18,<br>19,21,23 20,22,24 | 2 P05539,P21674                             |
| 4335 | 1,3,6,7,17, 2,4,5,8,18,<br>19,21,24 20,22,23 | 4 P05539,P20762,P54921,Q6AY61               |
| 4336 | 1,3,6,7,17, 2,4,5,8,18,<br>19,22,23 20,21,24 | 5 P01946,P02091,P02783,P25809,P70549        |
| 4337 | 1,3,6,7,17, 2,4,5,8,18,<br>19,22,24 20,21,23 | 4 P01946,P02091,P25809,P70549               |
| 4338 | 1,3,6,7,17, 2,4,5,8,18,<br>19,23,24 20,21,22 | 2 P25809,P70549                             |
| 4339 | 1,3,6,7,17, 2,4,5,8,18,<br>20,21,22 19,23,24 | 3 P01946,P02091,P05539                      |
| 4340 | 1,3,6,7,17, 2,4,5,8,18,<br>20,21,23 19,22,24 | 2 P05539,P09656                             |
| 4341 | 1,3,6,7,17, 2,4,5,8,18,<br>20,21,24 19,22,23 | 4 P04762,P05539,P20762,Q6AY61               |
| 4342 | 1,3,6,7,17, 2,4,5,8,18,<br>20,22,23 19,21,24 | 3 P01946,P02091,P02783                      |
| 4343 | 1,3,6,7,17, 2,4,5,8,18,<br>20,22,24 19,21,23 | 3 P01946,P02091,P22006                      |
| 4344 | 1,3,6,7,17, 2,4,5,8,18,<br>20,23,24 19,21,22 | 0                                           |
| 4345 | 1,3,6,7,17, 2,4,5,8,18,<br>21,22,23 19,20,24 | 6 P01946,P02091,P02783,P05539,P09656,Q9R168 |
| 4346 | 1,3,6,7,17, 2,4,5,8,18,<br>21,22,24 19,20,23 | 5 P01946,P02091,P04762,P05539,Q9R168        |
| 4347 | 1,3,6,7,17, 2,4,5,8,18,<br>21,23,24 19,20,22 | 2 P04762,P05539                             |
| 4348 | 1,3,6,7,17, 2,4,5,8,18,<br>22,23,24 19,20,21 | 6 P01946,P02091,P02783,P06760,P25809,P70549 |
| 4349 | 1,3,6,7,18, 2,4,5,8,17,<br>19,20,21 22,23,24 | 5 P20760,P22283,P47967,Q5PQL7,Q63617        |
| 4350 | 1,3,6,7,18, 2,4,5,8,17,<br>19,20,22 21,23,24 | 1 Q5PQL7                                    |

|      |                                              |                                                                          |
|------|----------------------------------------------|--------------------------------------------------------------------------|
| 4351 | 1,3,6,7,18, 2,4,5,8,17,<br>19,20,23 21,22,24 | 0                                                                        |
| 4352 | 1,3,6,7,18, 2,4,5,8,17,<br>19,20,24 21,22,23 | 2 P70549,Q9QW07                                                          |
| 4353 | 1,3,6,7,18, 2,4,5,8,17,<br>19,21,22 20,23,24 | 3 P01946,P23739,Q5PQL7                                                   |
| 4354 | 1,3,6,7,18, 2,4,5,8,17,<br>19,21,23 20,22,24 | 0                                                                        |
| 4355 | 1,3,6,7,18, 2,4,5,8,17,<br>19,21,24 20,22,23 | 1 P36376                                                                 |
| 4356 | 1,3,6,7,18, 2,4,5,8,17,<br>19,22,23 20,21,24 | 4 D4A5U3,P02783,P19223,P70549                                            |
| 4357 | 1,3,6,7,18, 2,4,5,8,17,<br>19,22,24 20,21,23 | 4 D4A5U3,P19223,P25809,P70549                                            |
| 4358 | 1,3,6,7,18, 2,4,5,8,17,<br>19,23,24 20,21,22 | 4 D4A5U3,P19223,P25809,P70549                                            |
| 4359 | 1,3,6,7,18, 2,4,5,8,17,<br>20,21,22 19,23,24 | 2 P01835,Q5PQL7                                                          |
| 4360 | 1,3,6,7,18, 2,4,5,8,17,<br>20,21,23 19,22,24 | 2 P01835,P09656                                                          |
| 4361 | 1,3,6,7,18, 2,4,5,8,17,<br>20,21,24 19,22,23 | 1 P01835                                                                 |
| 4362 | 1,3,6,7,18, 2,4,5,8,17,<br>20,22,23 19,21,24 | 2 P02783,Q62894                                                          |
| 4363 | 1,3,6,7,18, 2,4,5,8,17,<br>20,22,24 19,21,23 | 1 P22006                                                                 |
| 4364 | 1,3,6,7,18, 2,4,5,8,17,<br>20,23,24 19,21,22 | 0                                                                        |
| 4365 | 1,3,6,7,18, 2,4,5,8,17,<br>21,22,23 19,20,24 | 3 P01835,P02783,P09656                                                   |
| 4366 | 1,3,6,7,18, 2,4,5,8,17,<br>21,22,24 19,20,23 | 4 P01835,P23739,P36376,Q8CJD3                                            |
| 4367 | 1,3,6,7,18, 2,4,5,8,17,<br>21,23,24 19,20,22 | 1 P01835                                                                 |
| 4368 | 1,3,6,7,18, 2,4,5,8,17,<br>22,23,24 19,20,21 | 10 D4A5U3,P02783,P06760,P13676,P19223,P25809,P70549,P97675,Q64268,Q6P6R2 |
| 4369 | 1,3,6,7,19, 2,4,5,8,17,<br>20,21,22 18,23,24 | 3 P01946,Q5PQL7,Q63617                                                   |
| 4370 | 1,3,6,7,19, 2,4,5,8,17,<br>20,21,23 18,22,24 | 1 P09656                                                                 |

|      |                                              |                                                                                 |
|------|----------------------------------------------|---------------------------------------------------------------------------------|
| 4371 | 1,3,6,7,19, 2,4,5,8,17,<br>20,21,24 18,22,23 | 4 O35547,P05369,P22283,Q63617                                                   |
| 4372 | 1,3,6,7,19, 2,4,5,8,17,<br>20,22,23 18,21,24 | 1 P02783                                                                        |
| 4373 | 1,3,6,7,19, 2,4,5,8,17,<br>20,22,24 18,21,23 | 2 P22006,P70549                                                                 |
| 4374 | 1,3,6,7,19, 2,4,5,8,17,<br>20,23,24 18,21,22 | 1 P70549                                                                        |
| 4375 | 1,3,6,7,19, 2,4,5,8,17,<br>21,22,23 18,20,24 | 3 P01946,P02091,P02783                                                          |
| 4376 | 1,3,6,7,19, 2,4,5,8,17,<br>21,22,24 18,20,23 | 3 P01946,P02091,P36376                                                          |
| 4377 | 1,3,6,7,19, 2,4,5,8,17,<br>21,23,24 18,20,22 | 2 P25809,Q9Z0J6                                                                 |
| 4378 | 1,3,6,7,19, 2,4,5,8,17,<br>22,23,24 18,20,21 | 11 D4A5U3,P01946,P02091,P02783,P06760,P19223,P25809,P36375,P70549,Q10758,Q811M5 |
| 4379 | 1,3,6,7,20, 2,4,5,8,17,<br>21,22,23 18,19,24 | 3 P01835,P02783,P09656                                                          |
| 4380 | 1,3,6,7,20, 2,4,5,8,17,<br>21,22,24 18,19,23 | 2 P01835,P22006                                                                 |
| 4381 | 1,3,6,7,20, 2,4,5,8,17,<br>21,23,24 18,19,22 | 2 P01835,P09656                                                                 |
| 4382 | 1,3,6,7,20, 2,4,5,8,17,<br>22,23,24 18,19,21 | 5 P02783,P06760,P09656,P22006,Q9QX74                                            |
| 4383 | 1,3,6,7,21, 2,4,5,8,17,<br>22,23,24 18,19,20 | 7 D4A5U3,P01835,P01946,P02783,P09656,P25809,Q62714                              |
| 4384 | 1,3,6,8,17, 2,4,5,7,21,<br>18,19,20 22,23,24 | 3 B0LT89,P08649,Q9R168                                                          |
| 4385 | 1,3,6,8,17, 2,4,5,7,20,<br>18,19,21 22,23,24 | 0                                                                               |
| 4386 | 1,3,6,8,17, 2,4,5,7,20,<br>18,19,22 21,23,24 | 4 P01946,P02091,P08649,P70549                                                   |
| 4387 | 1,3,6,8,17, 2,4,5,7,20,<br>18,19,23 21,22,24 | 3 P21674,P70549,Q9Z0J6                                                          |
| 4388 | 1,3,6,8,17, 2,4,5,7,20,<br>18,19,24 21,22,23 | 1 P70549                                                                        |
| 4389 | 1,3,6,8,17, 2,4,5,7,19,<br>18,20,21 22,23,24 | 0                                                                               |
| 4390 | 1,3,6,8,17, 2,4,5,7,19,<br>18,20,22 21,23,24 | 2 P01946,P02091                                                                 |



|      |                                              |                                      |
|------|----------------------------------------------|--------------------------------------|
| 4391 | 1,3,6,8,17, 2,4,5,7,19,<br>18,20,23 21,22,24 | 1 Q9R168                             |
| 4392 | 1,3,6,8,17, 2,4,5,7,19,<br>18,20,24 21,22,23 | 2 P13432,Q9R168                      |
| 4393 | 1,3,6,8,17, 2,4,5,7,19,<br>18,21,22 20,23,24 | 2 P01946,P02091                      |
| 4394 | 1,3,6,8,17, 2,4,5,7,19,<br>18,21,23 20,22,24 | 0                                    |
| 4395 | 1,3,6,8,17, 2,4,5,7,19,<br>18,21,24 20,22,23 | 0                                    |
| 4396 | 1,3,6,8,17, 2,4,5,7,19,<br>18,22,23 20,21,24 | 4 P01946,P02091,P02783,P70549        |
| 4397 | 1,3,6,8,17, 2,4,5,7,19,<br>18,22,24 20,21,23 | 3 P01946,P02091,P70549               |
| 4398 | 1,3,6,8,17, 2,4,5,7,19,<br>18,23,24 20,21,22 | 1 P70549                             |
| 4399 | 1,3,6,8,17, 2,4,5,7,18,<br>19,20,21 22,23,24 | 3 B0LT89,Q6P6R2,Q9J185               |
| 4400 | 1,3,6,8,17, 2,4,5,7,18,<br>19,20,22 21,23,24 | 4 O89117,P01946,P02091,P70549        |
| 4401 | 1,3,6,8,17, 2,4,5,7,18,<br>19,20,23 21,22,24 | 2 O89117,P70549                      |
| 4402 | 1,3,6,8,17, 2,4,5,7,18,<br>19,20,24 21,22,23 | 2 O89117,P70549                      |
| 4403 | 1,3,6,8,17, 2,4,5,7,18,<br>19,21,22 20,23,24 | 2 P01946,P02091                      |
| 4404 | 1,3,6,8,17, 2,4,5,7,18,<br>19,21,23 20,22,24 | 2 P21674,Q9Z0J6                      |
| 4405 | 1,3,6,8,17, 2,4,5,7,18,<br>19,21,24 20,22,23 | 1 P70549                             |
| 4406 | 1,3,6,8,17, 2,4,5,7,18,<br>19,22,23 20,21,24 | 5 O89117,P01946,P02091,P02783,P70549 |
| 4407 | 1,3,6,8,17, 2,4,5,7,18,<br>19,22,24 20,21,23 | 4 O89117,P01946,P02091,P70549        |
| 4408 | 1,3,6,8,17, 2,4,5,7,18,<br>19,23,24 20,21,22 | 2 P70549,Q9Z0J6                      |
| 4409 | 1,3,6,8,17, 2,4,5,7,18,<br>20,21,22 19,23,24 | 3 P01946,P02091,P63029               |
| 4410 | 1,3,6,8,17, 2,4,5,7,18,<br>20,21,23 19,22,24 | 2 P09656,P63029                      |

|      |                                              |                                                    |
|------|----------------------------------------------|----------------------------------------------------|
| 4411 | 1,3,6,8,17, 2,4,5,7,18,<br>20,21,24 19,22,23 | 0                                                  |
| 4412 | 1,3,6,8,17, 2,4,5,7,18,<br>20,22,23 19,21,24 | 5 O89117,P01946,P02091,P02783,P63029               |
| 4413 | 1,3,6,8,17, 2,4,5,7,18,<br>20,22,24 19,21,23 | 3 O89117,P01946,P02091                             |
| 4414 | 1,3,6,8,17, 2,4,5,7,18,<br>20,23,24 19,21,22 | 1 P70549                                           |
| 4415 | 1,3,6,8,17, 2,4,5,7,18,<br>21,22,23 19,20,24 | 4 P01946,P02091,P02783,P09656                      |
| 4416 | 1,3,6,8,17, 2,4,5,7,18,<br>21,22,24 19,20,23 | 2 P01946,P02091                                    |
| 4417 | 1,3,6,8,17, 2,4,5,7,18,<br>21,23,24 19,20,22 | 1 Q80WL1                                           |
| 4418 | 1,3,6,8,17, 2,4,5,7,18,<br>22,23,24 19,20,21 | 7 P01946,P02091,P02783,P47967,P62804,P70549,Q5I0D1 |
| 4419 | 1,3,6,8,18, 2,4,5,7,17,<br>19,20,21 22,23,24 | 3 Q9JI85,Q9QW07,Q9R168                             |
| 4420 | 1,3,6,8,18, 2,4,5,7,17,<br>19,20,22 21,23,24 | 2 P36860,Q9R168                                    |
| 4421 | 1,3,6,8,18, 2,4,5,7,17,<br>19,20,23 21,22,24 | 1 Q9R168                                           |
| 4422 | 1,3,6,8,18, 2,4,5,7,17,<br>19,20,24 21,22,23 | 3 P70549,Q9QW07,Q9R168                             |
| 4423 | 1,3,6,8,18, 2,4,5,7,17,<br>19,21,22 20,23,24 | 2 P01946,P02091                                    |
| 4424 | 1,3,6,8,18, 2,4,5,7,17,<br>19,21,23 20,22,24 | 1 Q9Z0J6                                           |
| 4425 | 1,3,6,8,18, 2,4,5,7,17,<br>19,21,24 20,22,23 | 0                                                  |
| 4426 | 1,3,6,8,18, 2,4,5,7,17,<br>19,22,23 20,21,24 | 7 P01946,P02091,P02783,P19223,P70549,Q6AY61,Q9Z0J6 |
| 4427 | 1,3,6,8,18, 2,4,5,7,17,<br>19,22,24 20,21,23 | 2 P19223,P70549                                    |
| 4428 | 1,3,6,8,18, 2,4,5,7,17,<br>19,23,24 20,21,22 | 3 P19223,P70549,Q9Z0J6                             |
| 4429 | 1,3,6,8,18, 2,4,5,7,17,<br>20,21,22 19,23,24 | 1 P54921                                           |
| 4430 | 1,3,6,8,18, 2,4,5,7,17,<br>20,21,23 19,22,24 | 3 P09656,P54921,Q9R168                             |

|      |                                              |                                                                          |
|------|----------------------------------------------|--------------------------------------------------------------------------|
| 4431 | 1,3,6,8,18, 2,4,5,7,17,<br>20,21,24 19,22,23 | 2 Q9QW07,Q9R168                                                          |
| 4432 | 1,3,6,8,18, 2,4,5,7,17,<br>20,22,23 19,21,24 | 4 P02783,P54921,Q6AY61,Q9R168                                            |
| 4433 | 1,3,6,8,18, 2,4,5,7,17,<br>20,22,24 19,21,23 | 2 P22006,Q9R168                                                          |
| 4434 | 1,3,6,8,18, 2,4,5,7,17,<br>20,23,24 19,21,22 | 1 Q9R168                                                                 |
| 4435 | 1,3,6,8,18, 2,4,5,7,17,<br>21,22,23 19,20,24 | 3 P02783,P09656,P54921                                                   |
| 4436 | 1,3,6,8,18, 2,4,5,7,17,<br>21,22,24 19,20,23 | 1 Q8CJD3                                                                 |
| 4437 | 1,3,6,8,18, 2,4,5,7,17,<br>21,23,24 19,20,22 | 1 Q9Z0J6                                                                 |
| 4438 | 1,3,6,8,18, 2,4,5,7,17,<br>22,23,24 19,20,21 | 6 P02783,P06760,P19223,P20646,P62804,P70549                              |
| 4439 | 1,3,6,8,19, 2,4,5,7,17,<br>20,21,22 18,23,24 | 2 P01946,P02091                                                          |
| 4440 | 1,3,6,8,19, 2,4,5,7,17,<br>20,21,23 18,22,24 | 2 P09656,Q9Z0J6                                                          |
| 4441 | 1,3,6,8,19, 2,4,5,7,17,<br>20,21,24 18,22,23 | 5 O35547,P08723,P30120,Q9JI85,Q9QW07                                     |
| 4442 | 1,3,6,8,19, 2,4,5,7,17,<br>20,22,23 18,21,24 | 4 P01946,P02091,P02783,P19218                                            |
| 4443 | 1,3,6,8,19, 2,4,5,7,17,<br>20,22,24 18,21,23 | 3 P22006,P70549,Q9QW07                                                   |
| 4444 | 1,3,6,8,19, 2,4,5,7,17,<br>20,23,24 18,21,22 | 3 P70549,Q9QW07,Q9Z0J6                                                   |
| 4445 | 1,3,6,8,19, 2,4,5,7,17,<br>21,22,23 18,20,24 | 5 P01946,P02091,P02783,P09656,Q9Z0J6                                     |
| 4446 | 1,3,6,8,19, 2,4,5,7,17,<br>21,22,24 18,20,23 | 3 P01946,P02091,P30919                                                   |
| 4447 | 1,3,6,8,19, 2,4,5,7,17,<br>21,23,24 18,20,22 | 1 Q9Z0J6                                                                 |
| 4448 | 1,3,6,8,19, 2,4,5,7,17,<br>22,23,24 18,20,21 | 10 P00507,P01946,P02091,P02783,P19223,P25809,P62804,P70549,Q811M5,Q9Z0J6 |
| 4449 | 1,3,6,8,20, 2,4,5,7,17,<br>21,22,23 18,19,24 | 5 P02783,P09656,P13265,P19629,P54921                                     |
| 4450 | 1,3,6,8,20, 2,4,5,7,17,<br>21,22,24 18,19,23 | 0                                                                        |

|      |                                              |                                                                  |
|------|----------------------------------------------|------------------------------------------------------------------|
| 4451 | 1,3,6,8,20, 2,4,5,7,17,<br>21,23,24 18,19,22 | 1 P09656                                                         |
| 4452 | 1,3,6,8,20, 2,4,5,7,17,<br>22,23,24 18,19,21 | 4 P02783,P09656,P22006,P62804                                    |
| 4453 | 1,3,6,8,21, 2,4,5,7,17,<br>22,23,24 18,19,20 | 8 P01946,P02783,P09656,P13265,P20646,P30919,Q62714,Q9Z0J6        |
| 4454 | 1,3,6,17,1 2,4,5,7,8,2<br>8,19,20,21 2,23,24 | 7 BOLT89,P05539,P20760,P20761,P20762,P39069,Q6P6R2               |
| 4455 | 1,3,6,17,1 2,4,5,7,8,2<br>8,19,20,22 1,23,24 | 6 O89117,P01946,P02091,P39069,P70549,Q06000                      |
| 4456 | 1,3,6,17,1 2,4,5,7,8,2<br>8,19,20,23 1,22,24 | 2 P39069,P70549                                                  |
| 4457 | 1,3,6,17,1 2,4,5,7,8,2<br>8,19,20,24 1,22,23 | 1 P70549                                                         |
| 4458 | 1,3,6,17,1 2,4,5,7,8,2<br>8,19,21,22 0,23,24 | 5 P01946,P02091,P05539,P23739,Q4G075                             |
| 4459 | 1,3,6,17,1 2,4,5,7,8,2<br>8,19,21,23 0,22,24 | 1 Q4G075                                                         |
| 4460 | 1,3,6,17,1 2,4,5,7,8,2<br>8,19,21,24 0,22,23 | 3 P05539,P70549,Q4G075                                           |
| 4461 | 1,3,6,17,1 2,4,5,7,8,2<br>8,19,22,23 0,21,24 | 9 D4A5U3,P01946,P02091,P02783,P06760,P22273,P70549,P82471,Q4G075 |
| 4462 | 1,3,6,17,1 2,4,5,7,8,2<br>8,19,22,24 0,21,23 | 7 D4A5U3,P01946,P02091,P06760,P22273,P70549,Q4G075               |
| 4463 | 1,3,6,17,1 2,4,5,7,8,2<br>8,19,23,24 0,21,22 | 5 D4A5U3,P06760,P22273,P70549,Q4G075                             |
| 4464 | 1,3,6,17,1 2,4,5,7,8,1<br>8,20,21,22 9,23,24 | 3 P01946,P02091,Q5PQL7                                           |
| 4465 | 1,3,6,17,1 2,4,5,7,8,1<br>8,20,21,23 9,22,24 | 0                                                                |
| 4466 | 1,3,6,17,1 2,4,5,7,8,1<br>8,20,21,24 9,22,23 | 0                                                                |
| 4467 | 1,3,6,17,1 2,4,5,7,8,1<br>8,20,22,23 9,21,24 | 5 P01946,P02091,P02783,P04355,P06760                             |
| 4468 | 1,3,6,17,1 2,4,5,7,8,1<br>8,20,22,24 9,21,23 | 5 P01946,P02091,P06760,P22006,P70549                             |
| 4469 | 1,3,6,17,1 2,4,5,7,8,1<br>8,20,23,24 9,21,22 | 3 P06760,P62804,P70549                                           |
| 4470 | 1,3,6,17,1 2,4,5,7,8,1<br>8,21,22,23 9,20,24 | 8 D4A5U3,P01946,P02091,P02780,P02783,P82471,Q4G075,Q6TMA8        |

|      |                                              |    |                                                                                                                                      |
|------|----------------------------------------------|----|--------------------------------------------------------------------------------------------------------------------------------------|
| 4471 | 1,3,6,17,1 2,4,5,7,8,1<br>8,21,22,24 9,20,23 | 8  | P01946,P02091,P05539,P10758,P23739,Q4G075,Q6TMA8,Q8CJD3                                                                              |
| 4472 | 1,3,6,17,1 2,4,5,7,8,1<br>8,21,23,24 9,20,22 | 4  | D4A5U3,P02780,Q4G075,Q6TMA8                                                                                                          |
| 4473 | 1,3,6,17,1 2,4,5,7,8,1<br>8,22,23,24 9,20,21 | 19 | D4A5U3,P01946,P02091,P02780,P02783,P06760,P22273,P22282,P25809,P47967,P55159,P62804,P70549,Q00715,Q4G075,Q5I0D1,Q63617,Q6TMA8,Q9WTT6 |
| 4474 | 1,3,6,17,1 2,4,5,7,8,1<br>9,20,21,22 8,23,24 | 6  | O89117,P01946,P02091,P05539,P20762,Q5PQL7                                                                                            |
| 4475 | 1,3,6,17,1 2,4,5,7,8,1<br>9,20,21,23 8,22,24 | 1  | P20762                                                                                                                               |
| 4476 | 1,3,6,17,1 2,4,5,7,8,1<br>9,20,21,24 8,22,23 | 2  | P05539,P20762                                                                                                                        |
| 4477 | 1,3,6,17,1 2,4,5,7,8,1<br>9,20,22,23 8,21,24 | 6  | O89117,P01946,P02091,P02783,P70549,Q00715                                                                                            |
| 4478 | 1,3,6,17,1 2,4,5,7,8,1<br>9,20,22,24 8,21,23 | 7  | O89117,P01946,P02091,P20762,P22006,P70549,Q00715                                                                                     |
| 4479 | 1,3,6,17,1 2,4,5,7,8,1<br>9,20,23,24 8,21,22 | 2  | P70549,Q00715                                                                                                                        |
| 4480 | 1,3,6,17,1 2,4,5,7,8,1<br>9,21,22,23 8,20,24 | 5  | P01946,P02091,P02783,P70549,Q4G075                                                                                                   |
| 4481 | 1,3,6,17,1 2,4,5,7,8,1<br>9,21,22,24 8,20,23 | 6  | P01946,P02091,P05539,P20762,P70549,Q4G075                                                                                            |
| 4482 | 1,3,6,17,1 2,4,5,7,8,1<br>9,21,23,24 8,20,22 | 4  | P20762,P70549,Q4G075,Q9Z0J6                                                                                                          |
| 4483 | 1,3,6,17,1 2,4,5,7,8,1<br>9,22,23,24 8,20,21 | 13 | D4A5U3,P01946,P02091,P02780,P02783,P06760,P22273,P25809,P62804,P70549,Q00715,Q4G075,Q811M5                                           |
| 4484 | 1,3,6,17,2 2,4,5,7,8,1<br>0,21,22,23 8,19,24 | 5  | P01946,P02091,P02783,P09656,P63029                                                                                                   |
| 4485 | 1,3,6,17,2 2,4,5,7,8,1<br>0,21,22,24 8,19,23 | 3  | P01946,P02091,P20762                                                                                                                 |
| 4486 | 1,3,6,17,2 2,4,5,7,8,1<br>0,21,23,24 8,19,22 | 2  | P09656,P20762                                                                                                                        |
| 4487 | 1,3,6,17,2 2,4,5,7,8,1<br>0,22,23,24 8,19,21 | 11 | O89117,P01946,P02091,P02783,P06760,P09656,P22006,P62804,P70549,Q00715,Q66H69                                                         |
| 4488 | 1,3,6,17,2 2,4,5,7,8,1<br>1,22,23,24 8,19,20 | 9  | D4A5U3,P01946,P02091,P02780,P02783,P09656,Q4G075,Q5I0D1,Q6TMA8                                                                       |
| 4489 | 1,3,6,18,1 2,4,5,7,8,1<br>9,20,21,22 7,23,24 | 4  | P01946,P20760,P39069,Q5PQL7                                                                                                          |
| 4490 | 1,3,6,18,1 2,4,5,7,8,1<br>9,20,21,23 7,22,24 | 1  | P39069                                                                                                                               |

|      |                                              |    |                                                                                                                               |
|------|----------------------------------------------|----|-------------------------------------------------------------------------------------------------------------------------------|
| 4491 | 1,3,6,18,1 2,4,5,7,8,1<br>9,20,21,24 7,22,23 | 1  | P20760                                                                                                                        |
| 4492 | 1,3,6,18,1 2,4,5,7,8,1<br>9,20,22,23 7,21,24 | 5  | P02783,P06760,P36860,P39069,P70549                                                                                            |
| 4493 | 1,3,6,18,1 2,4,5,7,8,1<br>9,20,22,24 7,21,23 | 6  | P06760,P22006,P39069,P70549,Q9QX74,Q9Z0V6                                                                                     |
| 4494 | 1,3,6,18,1 2,4,5,7,8,1<br>9,20,23,24 7,21,22 | 2  | P06760,P70549                                                                                                                 |
| 4495 | 1,3,6,18,1 2,4,5,7,8,1<br>9,21,22,23 7,20,24 | 11 | D4A5U3,P01946,P02091,P02783,P19223,P82471,P97697,Q4G075,Q6TMA8,Q811M5,Q9Z0J6                                                  |
| 4496 | 1,3,6,18,1 2,4,5,7,8,1<br>9,21,22,24 7,20,23 | 8  | D4A5U3,P01946,P02091,P19223,P23739,P70549,P97697,Q4G075                                                                       |
| 4497 | 1,3,6,18,1 2,4,5,7,8,1<br>9,21,23,24 7,20,22 | 6  | D4A5U3,P19223,P70549,P97697,Q4G075,Q9Z0J6                                                                                     |
| 4498 | 1,3,6,18,1 2,4,5,7,8,1<br>9,22,23,24 7,20,21 | 18 | D4A5U3,P01946,P02091,P02783,P06760,P13676,P19223,P22273,P25809,P62804,P70549,P97697,Q00715,Q4G075,Q811M5,Q9QX74,Q9WTT6,Q9Z0J6 |
| 4499 | 1,3,6,18,2 2,4,5,7,8,1<br>0,21,22,23 7,19,24 | 4  | P02783,P09656,P54921,Q6TMA8                                                                                                   |
| 4500 | 1,3,6,18,2 2,4,5,7,8,1<br>0,21,22,24 7,19,23 | 2  | P22006,Q8CJD3                                                                                                                 |
| 4501 | 1,3,6,18,2 2,4,5,7,8,1<br>0,21,23,24 7,19,22 | 2  | P09656,P20646                                                                                                                 |
| 4502 | 1,3,6,18,2 2,4,5,7,8,1<br>0,22,23,24 7,19,21 | 11 | P02783,P04355,P06760,P20646,P22006,P62804,P70549,Q00715,Q5QE79,Q66H69,Q9QX74                                                  |
| 4503 | 1,3,6,18,2 2,4,5,7,8,1<br>1,22,23,24 7,19,20 | 13 | D4A5U3,P01946,P02783,P06760,P09656,P13676,P19223,P20646,P97697,Q4G075,Q6TMA8,Q8CJD3,Q9WTT6                                    |
| 4504 | 1,3,6,19,2 2,4,5,7,8,1<br>0,21,22,23 7,18,24 | 4  | P01946,P02091,P02783,P09656                                                                                                   |
| 4505 | 1,3,6,19,2 2,4,5,7,8,1<br>0,21,22,24 7,18,23 | 6  | O70594,P01946,P02091,P20762,P22006,Q9Z0V6                                                                                     |
| 4506 | 1,3,6,19,2 2,4,5,7,8,1<br>0,21,23,24 7,18,22 | 1  | P09656                                                                                                                        |
| 4507 | 1,3,6,19,2 2,4,5,7,8,1<br>0,22,23,24 7,18,21 | 10 | P01946,P02091,P02783,P06760,P22006,P62804,P70549,Q00715,Q811M5,Q9QX74                                                         |
| 4508 | 1,3,6,19,2 2,4,5,7,8,1<br>1,22,23,24 7,18,20 | 14 | D4A5U3,P01946,P02091,P02783,P09656,P19223,P25809,P55091,P70549,P97697,Q4G075,Q811M5,Q9WTT6,Q9Z0J6                             |
| 4509 | 1,3,6,20,2 2,4,5,7,8,1<br>1,22,23,24 7,18,19 | 7  | P01946,P02783,P07150,P09656,P20646,P22006,Q9QX74                                                                              |
| 4510 | 1,3,7,8,17, 2,4,5,6,21,<br>18,19,20 22,23,24 | 5  | P13676,P30919,P47727,Q811M5,Q9WTT6                                                                                            |

|      |                                              |                                                                                 |
|------|----------------------------------------------|---------------------------------------------------------------------------------|
| 4511 | 1,3,7,8,17, 2,4,5,6,20,<br>18,19,21 22,23,24 | 6 P21674,P22006,Q66H69,Q6P6R2,Q811M5,Q9QX74                                     |
| 4512 | 1,3,7,8,17, 2,4,5,6,20,<br>18,19,22 21,23,24 | 1 P35280                                                                        |
| 4513 | 1,3,7,8,17, 2,4,5,6,20,<br>18,19,23 21,22,24 | 2 O55145,P21674                                                                 |
| 4514 | 1,3,7,8,17, 2,4,5,6,20,<br>18,19,24 21,22,23 | 1 P70549                                                                        |
| 4515 | 1,3,7,8,17, 2,4,5,6,19,<br>18,20,21 22,23,24 | 7 P00507,P13676,Q6P6R2,Q811M5,Q9EQS0,Q9QX74,Q9WTT6                              |
| 4516 | 1,3,7,8,17, 2,4,5,6,19,<br>18,20,22 21,23,24 | 2 O70417,P35280                                                                 |
| 4517 | 1,3,7,8,17, 2,4,5,6,19,<br>18,20,23 21,22,24 | 1 P30919                                                                        |
| 4518 | 1,3,7,8,17, 2,4,5,6,19,<br>18,20,24 21,22,23 | 1 Q811M5                                                                        |
| 4519 | 1,3,7,8,17, 2,4,5,6,19,<br>18,21,22 20,23,24 | 1 P35280                                                                        |
| 4520 | 1,3,7,8,17, 2,4,5,6,19,<br>18,21,23 20,22,24 | 3 P21674,P22006,Q9QX74                                                          |
| 4521 | 1,3,7,8,17, 2,4,5,6,19,<br>18,21,24 20,22,23 | 1 Q811M5                                                                        |
| 4522 | 1,3,7,8,17, 2,4,5,6,19,<br>18,22,23 20,21,24 | 1 P35280                                                                        |
| 4523 | 1,3,7,8,17, 2,4,5,6,19,<br>18,22,24 20,21,23 | 1 P35280                                                                        |
| 4524 | 1,3,7,8,17, 2,4,5,6,19,<br>18,23,24 20,21,22 | 1 Q64268                                                                        |
| 4525 | 1,3,7,8,17, 2,4,5,6,18,<br>19,20,21 22,23,24 | 11 P13676,P16636,P24368,Q5RKI1,Q63493,Q6P6R2,Q811M5,Q812E4,Q9EQS0,Q9QX74,Q9WTT6 |
| 4526 | 1,3,7,8,17, 2,4,5,6,18,<br>19,20,22 21,23,24 | 6 O70417,O89117,P13676,P35280,Q9JJ50,Q9WTT6                                     |
| 4527 | 1,3,7,8,17, 2,4,5,6,18,<br>19,20,23 21,22,24 | 3 P13676,P21674,Q9WTT6                                                          |
| 4528 | 1,3,7,8,17, 2,4,5,6,18,<br>19,20,24 21,22,23 | 7 P08723,P13676,P16636,P54921,Q812E4,Q9EQS0,Q9WTT6                              |
| 4529 | 1,3,7,8,17, 2,4,5,6,18,<br>19,21,22 20,23,24 | 3 P02091,P35280,Q9QX74                                                          |
| 4530 | 1,3,7,8,17, 2,4,5,6,18,<br>19,21,23 20,22,24 | 4 P21674,P22006,Q9QX74,Q9Z0J6                                                   |

|      |                                              |                                                           |
|------|----------------------------------------------|-----------------------------------------------------------|
| 4531 | 1,3,7,8,17, 2,4,5,6,18,<br>19,21,24 20,22,23 | 5 P04355,P16636,P54921,Q9EQS0,Q9QX74                      |
| 4532 | 1,3,7,8,17, 2,4,5,6,18,<br>19,22,23 20,21,24 | 4 O55145,P02091,P35280,P70549                             |
| 4533 | 1,3,7,8,17, 2,4,5,6,18,<br>19,22,24 20,21,23 | 2 P35280,P70549                                           |
| 4534 | 1,3,7,8,17, 2,4,5,6,18,<br>19,23,24 20,21,22 | 3 O55145,P70549,Q9Z0J6                                    |
| 4535 | 1,3,7,8,17, 2,4,5,6,18,<br>20,21,22 19,23,24 | 2 P35280,Q9WTT6                                           |
| 4536 | 1,3,7,8,17, 2,4,5,6,18,<br>20,21,23 19,22,24 | 2 P13676,Q9WTT6                                           |
| 4537 | 1,3,7,8,17, 2,4,5,6,18,<br>20,21,24 19,22,23 | 6 P13676,P16636,P30120,Q811M5,Q812E4,Q9EQS0               |
| 4538 | 1,3,7,8,17, 2,4,5,6,18,<br>20,22,23 19,21,24 | 1 P35280                                                  |
| 4539 | 1,3,7,8,17, 2,4,5,6,18,<br>20,22,24 19,21,23 | 1 P35280                                                  |
| 4540 | 1,3,7,8,17, 2,4,5,6,18,<br>20,23,24 19,21,22 | 0                                                         |
| 4541 | 1,3,7,8,17, 2,4,5,6,18,<br>21,22,23 19,20,24 | 1 P35280                                                  |
| 4542 | 1,3,7,8,17, 2,4,5,6,18,<br>21,22,24 19,20,23 | 1 P35280                                                  |
| 4543 | 1,3,7,8,17, 2,4,5,6,18,<br>21,23,24 19,20,22 | 1 Q80WL1                                                  |
| 4544 | 1,3,7,8,17, 2,4,5,6,18,<br>22,23,24 19,20,21 | 1 P35280                                                  |
| 4545 | 1,3,7,8,18, 2,4,5,6,17,<br>19,20,21 22,23,24 | 8 D3ZUC6,P01039,P07335,P47967,Q5I0D1,Q5RKI1,Q811M5,Q9WTT6 |
| 4546 | 1,3,7,8,18, 2,4,5,6,17,<br>19,20,22 21,23,24 | 3 P01039,P35280,P36860                                    |
| 4547 | 1,3,7,8,18, 2,4,5,6,17,<br>19,20,23 21,22,24 | 3 P01039,P36860,Q9R168                                    |
| 4548 | 1,3,7,8,18, 2,4,5,6,17,<br>19,20,24 21,22,23 | 2 P08723,Q9R168                                           |
| 4549 | 1,3,7,8,18, 2,4,5,6,17,<br>19,21,22 20,23,24 | 2 P01039,P35280                                           |
| 4550 | 1,3,7,8,18, 2,4,5,6,17,<br>19,21,23 20,22,24 | 4 O35077,P01039,P21674,Q9Z0J6                             |



|      |                                              |                                                    |
|------|----------------------------------------------|----------------------------------------------------|
| 4551 | 1,3,7,8,18, 2,4,5,6,17,<br>19,21,24 20,22,23 | 0                                                  |
| 4552 | 1,3,7,8,18, 2,4,5,6,17,<br>19,22,23 20,21,24 | 4 P01039,P19223,P35280,Q9Z0J6                      |
| 4553 | 1,3,7,8,18, 2,4,5,6,17,<br>19,22,24 20,21,23 | 3 P19223,P35280,P70549                             |
| 4554 | 1,3,7,8,18, 2,4,5,6,17,<br>19,23,24 20,21,22 | 3 P19223,P70549,Q9Z0J6                             |
| 4555 | 1,3,7,8,18, 2,4,5,6,17,<br>20,21,22 19,23,24 | 2 P01039,P35280                                    |
| 4556 | 1,3,7,8,18, 2,4,5,6,17,<br>20,21,23 19,22,24 | 3 D3ZUC6,P01039,Q5RKI1                             |
| 4557 | 1,3,7,8,18, 2,4,5,6,17,<br>20,21,24 19,22,23 | 2 Q811M5,Q812E4                                    |
| 4558 | 1,3,7,8,18, 2,4,5,6,17,<br>20,22,23 19,21,24 | 2 P01039,P35280                                    |
| 4559 | 1,3,7,8,18, 2,4,5,6,17,<br>20,22,24 19,21,23 | 1 P35280                                           |
| 4560 | 1,3,7,8,18, 2,4,5,6,17,<br>20,23,24 19,21,22 | 1 Q9R168                                           |
| 4561 | 1,3,7,8,18, 2,4,5,6,17,<br>21,22,23 19,20,24 | 2 P01039,P35280                                    |
| 4562 | 1,3,7,8,18, 2,4,5,6,17,<br>21,22,24 19,20,23 | 2 P35280,Q8CJD3                                    |
| 4563 | 1,3,7,8,18, 2,4,5,6,17,<br>21,23,24 19,20,22 | 1 Q9Z0J6                                           |
| 4564 | 1,3,7,8,18, 2,4,5,6,17,<br>22,23,24 19,20,21 | 3 P19223,P35280,Q64268                             |
| 4565 | 1,3,7,8,19, 2,4,5,6,17,<br>20,21,22 18,23,24 | 4 P01039,P16636,P35280,Q5RKI1                      |
| 4566 | 1,3,7,8,19, 2,4,5,6,17,<br>20,21,23 18,22,24 | 5 D3ZUC6,P01039,Q5RKI1,Q812E4,Q9WTT6               |
| 4567 | 1,3,7,8,19, 2,4,5,6,17,<br>20,21,24 18,22,23 | 7 P02782,P08723,P16636,P30120,Q5RKI1,Q812E4,Q9EQS0 |
| 4568 | 1,3,7,8,19, 2,4,5,6,17,<br>20,22,23 18,21,24 | 3 P01039,P35280,P36860                             |
| 4569 | 1,3,7,8,19, 2,4,5,6,17,<br>20,22,24 18,21,23 | 3 P08723,P16636,P35280                             |
| 4570 | 1,3,7,8,19, 2,4,5,6,17,<br>20,23,24 18,21,22 | 1 Q812E4                                           |

|      |                                              |                                                    |
|------|----------------------------------------------|----------------------------------------------------|
| 4571 | 1,3,7,8,19, 2,4,5,6,17,<br>21,22,23 18,20,24 | 4 O35077,P01039,P35280,Q9Z0J6                      |
| 4572 | 1,3,7,8,19, 2,4,5,6,17,<br>21,22,24 18,20,23 | 4 P16636,P17559,P35280,P55091                      |
| 4573 | 1,3,7,8,19, 2,4,5,6,17,<br>21,23,24 18,20,22 | 1 Q9Z0J6                                           |
| 4574 | 1,3,7,8,19, 2,4,5,6,17,<br>22,23,24 18,20,21 | 5 P19223,P35280,P55091,P70549,Q9Z0J6               |
| 4575 | 1,3,7,8,20, 2,4,5,6,17,<br>21,22,23 18,19,24 | 2 P01039,P35280                                    |
| 4576 | 1,3,7,8,20, 2,4,5,6,17,<br>21,22,24 18,19,23 | 2 P16636,P35280                                    |
| 4577 | 1,3,7,8,20, 2,4,5,6,17,<br>21,23,24 18,19,22 | 1 Q812E4                                           |
| 4578 | 1,3,7,8,20, 2,4,5,6,17,<br>22,23,24 18,19,21 | 1 P35280                                           |
| 4579 | 1,3,7,8,21, 2,4,5,6,17,<br>22,23,24 18,19,20 | 2 P35280,Q62714                                    |
| 4580 | 1,3,7,17,1 2,4,5,6,8,2<br>8,19,20,21 2,23,24 | 7 O54858,P00507,P20760,P30919,Q63532,Q6P6R2,Q811M5 |
| 4581 | 1,3,7,17,1 2,4,5,6,8,2<br>8,19,20,22 1,23,24 | 5 O54858,P30919,P36860,Q63474,Q63532               |
| 4582 | 1,3,7,17,1 2,4,5,6,8,2<br>8,19,20,23 1,22,24 | 4 O54858,P30919,Q10743,Q6AYC4                      |
| 4583 | 1,3,7,17,1 2,4,5,6,8,2<br>8,19,20,24 1,22,23 | 5 O54858,P30919,P54921,P70549,Q63532               |
| 4584 | 1,3,7,17,1 2,4,5,6,8,2<br>8,19,21,22 0,23,24 | 2 P17559,P23739                                    |
| 4585 | 1,3,7,17,1 2,4,5,6,8,2<br>8,19,21,23 0,22,24 | 3 O54858,P21674,Q10743                             |
| 4586 | 1,3,7,17,1 2,4,5,6,8,2<br>8,19,21,24 0,22,23 | 6 O54858,P17559,P25031,P42854,P54921,Q63532        |
| 4587 | 1,3,7,17,1 2,4,5,6,8,2<br>8,19,22,23 0,21,24 | 4 P22273,P36375,P70549,Q10743                      |
| 4588 | 1,3,7,17,1 2,4,5,6,8,2<br>8,19,22,24 0,21,23 | 4 P17559,P25031,P36375,P70549                      |
| 4589 | 1,3,7,17,1 2,4,5,6,8,2<br>8,19,23,24 0,21,22 | 3 O55145,P70549,Q10743                             |
| 4590 | 1,3,7,17,1 2,4,5,6,8,1<br>8,20,21,22 9,23,24 | 2 O54858,P20760                                    |

|      |                                              |                                                                  |
|------|----------------------------------------------|------------------------------------------------------------------|
| 4591 | 1,3,7,17,1 2,4,5,6,8,1<br>8,20,21,23 9,22,24 | 3 O54858,P00507,P30919                                           |
| 4592 | 1,3,7,17,1 2,4,5,6,8,1<br>8,20,21,24 9,22,23 | 6 O54858,P00507,P20760,P42854,Q63532,Q811M5                      |
| 4593 | 1,3,7,17,1 2,4,5,6,8,1<br>8,20,22,23 9,21,24 | 2 P30919,Q10743                                                  |
| 4594 | 1,3,7,17,1 2,4,5,6,8,1<br>8,20,22,24 9,21,23 | 1 P42854                                                         |
| 4595 | 1,3,7,17,1 2,4,5,6,8,1<br>8,20,23,24 9,21,22 | 2 P30919,Q6AYC4                                                  |
| 4596 | 1,3,7,17,1 2,4,5,6,8,1<br>8,21,22,23 9,20,24 | 0                                                                |
| 4597 | 1,3,7,17,1 2,4,5,6,8,1<br>8,21,22,24 9,20,23 | 4 P17559,P25031,P42854,Q8CJD3                                    |
| 4598 | 1,3,7,17,1 2,4,5,6,8,1<br>8,21,23,24 9,20,22 | 2 P42854,Q64268                                                  |
| 4599 | 1,3,7,17,1 2,4,5,6,8,1<br>8,22,23,24 9,20,21 | 5 D4A5U3,P02631,P22273,P70549,Q64268                             |
| 4600 | 1,3,7,17,1 2,4,5,6,8,1<br>9,20,21,22 8,23,24 | 5 O54858,P16636,P20760,P20762,Q9JJ50                             |
| 4601 | 1,3,7,17,1 2,4,5,6,8,1<br>9,20,21,23 8,22,24 | 2 O54858,P20762                                                  |
| 4602 | 1,3,7,17,1 2,4,5,6,8,1<br>9,20,21,24 8,22,23 | 8 O54858,P16636,P20760,P20762,P54921,Q63532,Q6AY61,Q9Z2L0        |
| 4603 | 1,3,7,17,1 2,4,5,6,8,1<br>9,20,22,23 8,21,24 | 2 O89117,P36860                                                  |
| 4604 | 1,3,7,17,1 2,4,5,6,8,1<br>9,20,22,24 8,21,23 | 7 O89117,P16636,P20762,P54921,P70549,Q63532,Q9JJ50               |
| 4605 | 1,3,7,17,1 2,4,5,6,8,1<br>9,20,23,24 8,21,22 | 2 P54921,P70549                                                  |
| 4606 | 1,3,7,17,1 2,4,5,6,8,1<br>9,21,22,23 8,20,24 | 2 P02091,Q9R168                                                  |
| 4607 | 1,3,7,17,1 2,4,5,6,8,1<br>9,21,22,24 8,20,23 | 7 P02091,P16636,P17559,P20762,P25031,P54921,Q9R168               |
| 4608 | 1,3,7,17,1 2,4,5,6,8,1<br>9,21,23,24 8,20,22 | 2 P12020,Q9Z0J6                                                  |
| 4609 | 1,3,7,17,1 2,4,5,6,8,1<br>9,22,23,24 8,20,21 | 9 O55145,P02091,P02631,P22273,P25809,P36375,P70549,Q00715,Q9QZQ5 |
| 4610 | 1,3,7,17,2 2,4,5,6,8,1<br>0,21,22,23 8,19,24 | 0                                                                |

|      |                                              |                                                                                        |
|------|----------------------------------------------|----------------------------------------------------------------------------------------|
| 4611 | 1,3,7,17,2 2,4,5,6,8,1<br>0,21,22,24 8,19,23 | 2 P16636,P20762                                                                        |
| 4612 | 1,3,7,17,2 2,4,5,6,8,1<br>0,21,23,24 8,19,22 | 0                                                                                      |
| 4613 | 1,3,7,17,2 2,4,5,6,8,1<br>0,22,23,24 8,19,21 | 1 Q00715                                                                               |
| 4614 | 1,3,7,17,2 2,4,5,6,8,1<br>1,22,23,24 8,19,20 | 2 P50280,Q9R168                                                                        |
| 4615 | 1,3,7,18,1 2,4,5,6,8,1<br>9,20,21,22 7,23,24 | 6 O54858,P01039,P20760,P47967,P97840,Q5PQL7                                            |
| 4616 | 1,3,7,18,1 2,4,5,6,8,1<br>9,20,21,23 7,22,24 | 4 O54858,P01039,P20760,P23593                                                          |
| 4617 | 1,3,7,18,1 2,4,5,6,8,1<br>9,20,21,24 7,22,23 | 3 O54858,P20760,Q63532                                                                 |
| 4618 | 1,3,7,18,1 2,4,5,6,8,1<br>9,20,22,23 7,21,24 | 3 P01039,P36860,Q63474                                                                 |
| 4619 | 1,3,7,18,1 2,4,5,6,8,1<br>9,20,22,24 7,21,23 | 0                                                                                      |
| 4620 | 1,3,7,18,1 2,4,5,6,8,1<br>9,20,23,24 7,21,22 | 0                                                                                      |
| 4621 | 1,3,7,18,1 2,4,5,6,8,1<br>9,21,22,23 7,20,24 | 5 D4A5U3,P01039,P17559,P19223,Q9Z0J6                                                   |
| 4622 | 1,3,7,18,1 2,4,5,6,8,1<br>9,21,22,24 7,20,23 | 6 P17559,P19223,P25031,P36375,P36376,P55091                                            |
| 4623 | 1,3,7,18,1 2,4,5,6,8,1<br>9,21,23,24 7,20,22 | 4 D4A5U3,P17559,P19223,Q9Z0J6                                                          |
| 4624 | 1,3,7,18,1 2,4,5,6,8,1<br>9,22,23,24 7,20,21 | 12 D4A5U3,P02631,P17559,P19223,P22273,P25809,P36375,P55091,P70549,Q64268,Q9QZQ5,Q9Z0J6 |
| 4625 | 1,3,7,18,2 2,4,5,6,8,1<br>0,21,22,23 7,19,24 | 1 P01039                                                                               |
| 4626 | 1,3,7,18,2 2,4,5,6,8,1<br>0,21,22,24 7,19,23 | 2 P20760,Q8CJD3                                                                        |
| 4627 | 1,3,7,18,2 2,4,5,6,8,1<br>0,21,23,24 7,19,22 | 0                                                                                      |
| 4628 | 1,3,7,18,2 2,4,5,6,8,1<br>0,22,23,24 7,19,21 | 1 Q64268                                                                               |
| 4629 | 1,3,7,18,2 2,4,5,6,8,1<br>1,22,23,24 7,19,20 | 5 D4A5U3,P17559,P19223,Q64268,Q8CJD3                                                   |
| 4630 | 1,3,7,19,2 2,4,5,6,8,1<br>0,21,22,23 7,18,24 | 1 P01039                                                                               |

|      |                                              |                                                                          |
|------|----------------------------------------------|--------------------------------------------------------------------------|
| 4631 | 1,3,7,19,2 2,4,5,6,8,1<br>0,21,22,24 7,18,23 | 3 P16636,P20760,P20762                                                   |
| 4632 | 1,3,7,19,2 2,4,5,6,8,1<br>0,21,23,24 7,18,22 | 2 P08649,P16636                                                          |
| 4633 | 1,3,7,19,2 2,4,5,6,8,1<br>0,22,23,24 7,18,21 | 3 P70549,Q00715,Q9QZQ5                                                   |
| 4634 | 1,3,7,19,2 2,4,5,6,8,1<br>1,22,23,24 7,18,20 | 10 D4A5U3,P02454,P12020,P17559,P19223,P25809,P36375,P55091,Q9QZQ5,Q9Z0J6 |
| 4635 | 1,3,7,20,2 2,4,5,6,8,1<br>1,22,23,24 7,18,19 | 2 P08649,Q9QZQ5                                                          |
| 4636 | 1,3,8,17,1 2,4,5,6,7,2<br>8,19,20,21 2,23,24 | 6 B0LT89,P47727,P70619,Q6P6R2,Q811M5,Q9EQS0                              |
| 4637 | 1,3,8,17,1 2,4,5,6,7,2<br>8,19,20,22 1,23,24 | 4 O89117,P36860,P50116,Q9JJ50                                            |
| 4638 | 1,3,8,17,1 2,4,5,6,7,2<br>8,19,20,23 1,22,24 | 4 P30919,P36860,P50116,Q9R168                                            |
| 4639 | 1,3,8,17,1 2,4,5,6,7,2<br>8,19,20,24 1,22,23 | 4 P50116,P70549,P80299,Q9R168                                            |
| 4640 | 1,3,8,17,1 2,4,5,6,7,2<br>8,19,21,22 0,23,24 | 2 P02091,P50116                                                          |
| 4641 | 1,3,8,17,1 2,4,5,6,7,2<br>8,19,21,23 0,22,24 | 4 P21674,P22006,P50116,Q9Z0J6                                            |
| 4642 | 1,3,8,17,1 2,4,5,6,7,2<br>8,19,21,24 0,22,23 | 2 P50116,P80299                                                          |
| 4643 | 1,3,8,17,1 2,4,5,6,7,2<br>8,19,22,23 0,21,24 | 6 P00714,P02091,P11598,P50116,P70549,Q9Z0J6                              |
| 4644 | 1,3,8,17,1 2,4,5,6,7,2<br>8,19,22,24 0,21,23 | 2 P50116,P70549                                                          |
| 4645 | 1,3,8,17,1 2,4,5,6,7,2<br>8,19,23,24 0,21,22 | 5 O55145,P50116,P70549,P80299,Q9Z0J6                                     |
| 4646 | 1,3,8,17,1 2,4,5,6,7,1<br>8,20,21,22 9,23,24 | 1 P50116                                                                 |
| 4647 | 1,3,8,17,1 2,4,5,6,7,1<br>8,20,21,23 9,22,24 | 0                                                                        |
| 4648 | 1,3,8,17,1 2,4,5,6,7,1<br>8,20,21,24 9,22,23 | 5 P42854,P50116,P80299,Q811M5,Q9EQS0                                     |
| 4649 | 1,3,8,17,1 2,4,5,6,7,1<br>8,20,22,23 9,21,24 | 2 P00714,P50116                                                          |
| 4650 | 1,3,8,17,1 2,4,5,6,7,1<br>8,20,22,24 9,21,23 | 1 P50116                                                                 |

|      |                                              |                                                           |
|------|----------------------------------------------|-----------------------------------------------------------|
| 4651 | 1,3,8,17,1 2,4,5,6,7,1<br>8,20,23,24 9,21,22 | 3 P50116,P80299,Q9R168                                    |
| 4652 | 1,3,8,17,1 2,4,5,6,7,1<br>8,21,22,23 9,20,24 | 2 P00714,P50116                                           |
| 4653 | 1,3,8,17,1 2,4,5,6,7,1<br>8,21,22,24 9,20,23 | 3 P42854,P50116,P80299                                    |
| 4654 | 1,3,8,17,1 2,4,5,6,7,1<br>8,21,23,24 9,20,22 | 4 P50116,P80299,Q80WL1,Q9Z0J6                             |
| 4655 | 1,3,8,17,1 2,4,5,6,7,1<br>8,22,23,24 9,20,21 | 8 P00714,P11598,P50116,P70549,P80299,Q5I0D1,Q63617,Q9R0T3 |
| 4656 | 1,3,8,17,1 2,4,5,6,7,1<br>9,20,21,22 8,23,24 | 6 B0LT89,O89117,P02091,P16636,Q6P6R2,Q9JJ50               |
| 4657 | 1,3,8,17,1 2,4,5,6,7,1<br>9,20,21,23 8,22,24 | 1 Q6P6R2                                                  |
| 4658 | 1,3,8,17,1 2,4,5,6,7,1<br>9,20,21,24 8,22,23 | 6 B0LT89,P16636,P30120,Q6P6R2,Q9EQS0,Q9Z2L0               |
| 4659 | 1,3,8,17,1 2,4,5,6,7,1<br>9,20,22,23 8,21,24 | 4 O89117,P02091,P36860,P50116                             |
| 4660 | 1,3,8,17,1 2,4,5,6,7,1<br>9,20,22,24 8,21,23 | 5 O89117,P16636,P50116,P70549,Q9JJ50                      |
| 4661 | 1,3,8,17,1 2,4,5,6,7,1<br>9,20,23,24 8,21,22 | 2 P50116,P70549                                           |
| 4662 | 1,3,8,17,1 2,4,5,6,7,1<br>9,21,22,23 8,20,24 | 3 P02091,P50116,Q9Z0J6                                    |
| 4663 | 1,3,8,17,1 2,4,5,6,7,1<br>9,21,22,24 8,20,23 | 4 P02091,P16636,P50116,Q80WL1                             |
| 4664 | 1,3,8,17,1 2,4,5,6,7,1<br>9,21,23,24 8,20,22 | 4 P50116,P80299,Q80WL1,Q9Z0J6                             |
| 4665 | 1,3,8,17,1 2,4,5,6,7,1<br>9,22,23,24 8,20,21 | 8 O55145,P02091,P11598,P50116,P70549,Q00715,Q80WL1,Q9Z0J6 |
| 4666 | 1,3,8,17,2 2,4,5,6,7,1<br>0,21,22,23 8,19,24 | 1 P50116                                                  |
| 4667 | 1,3,8,17,2 2,4,5,6,7,1<br>0,21,22,24 8,19,23 | 2 P16636,P50116                                           |
| 4668 | 1,3,8,17,2 2,4,5,6,7,1<br>0,21,23,24 8,19,22 | 3 P50116,P80299,Q80WL1                                    |
| 4669 | 1,3,8,17,2 2,4,5,6,7,1<br>0,22,23,24 8,19,21 | 2 P50116,Q00715                                           |
| 4670 | 1,3,8,17,2 2,4,5,6,7,1<br>1,22,23,24 8,19,20 | 3 P11598,P50116,Q80WL1                                    |

|      |                                              |                                             |
|------|----------------------------------------------|---------------------------------------------|
| 4671 | 1,3,8,18,1 2,4,5,6,7,1<br>9,20,21,22 7,23,24 | 3 P01039,P36860,P50116                      |
| 4672 | 1,3,8,18,1 2,4,5,6,7,1<br>9,20,21,23 7,22,24 | 4 P01039,P50116,Q9R168,Q9Z0J6               |
| 4673 | 1,3,8,18,1 2,4,5,6,7,1<br>9,20,21,24 7,22,23 | 3 P30120,P50116,Q9R168                      |
| 4674 | 1,3,8,18,1 2,4,5,6,7,1<br>9,20,22,23 7,21,24 | 5 P01039,P36860,P50116,Q6AY61,Q9R168        |
| 4675 | 1,3,8,18,1 2,4,5,6,7,1<br>9,20,22,24 7,21,23 | 3 P36860,P50116,Q9R168                      |
| 4676 | 1,3,8,18,1 2,4,5,6,7,1<br>9,20,23,24 7,21,22 | 4 P36860,P50116,Q9R168,Q9Z0J6               |
| 4677 | 1,3,8,18,1 2,4,5,6,7,1<br>9,21,22,23 7,20,24 | 4 P01039,P19223,P50116,Q9Z0J6               |
| 4678 | 1,3,8,18,1 2,4,5,6,7,1<br>9,21,22,24 7,20,23 | 5 P17559,P19223,P50116,P55091,Q9Z0J6        |
| 4679 | 1,3,8,18,1 2,4,5,6,7,1<br>9,21,23,24 7,20,22 | 3 P19223,P50116,Q9Z0J6                      |
| 4680 | 1,3,8,18,1 2,4,5,6,7,1<br>9,22,23,24 7,20,21 | 6 P11598,P19223,P50116,P55091,P70549,Q9Z0J6 |
| 4681 | 1,3,8,18,2 2,4,5,6,7,1<br>0,21,22,23 7,19,24 | 3 P01039,P50116,P54921                      |
| 4682 | 1,3,8,18,2 2,4,5,6,7,1<br>0,21,22,24 7,19,23 | 1 P50116                                    |
| 4683 | 1,3,8,18,2 2,4,5,6,7,1<br>0,21,23,24 7,19,22 | 3 P50116,Q9R168,Q9Z0J6                      |
| 4684 | 1,3,8,18,2 2,4,5,6,7,1<br>0,22,23,24 7,19,21 | 3 P50116,Q5QE79,Q9R168                      |
| 4685 | 1,3,8,18,2 2,4,5,6,7,1<br>1,22,23,24 7,19,20 | 4 P19223,P50116,Q9R0T3,Q9Z0J6               |
| 4686 | 1,3,8,19,2 2,4,5,6,7,1<br>0,21,22,23 7,18,24 | 3 P01039,P50116,Q9Z0J6                      |
| 4687 | 1,3,8,19,2 2,4,5,6,7,1<br>0,21,22,24 7,18,23 | 3 O70594,P16636,P50116                      |
| 4688 | 1,3,8,19,2 2,4,5,6,7,1<br>0,21,23,24 7,18,22 | 4 P16636,P50116,Q64335,Q9Z0J6               |
| 4689 | 1,3,8,19,2 2,4,5,6,7,1<br>0,22,23,24 7,18,21 | 6 P36860,P50116,P70549,Q00715,Q9WVH8,Q9Z0J6 |
| 4690 | 1,3,8,19,2 2,4,5,6,7,1<br>1,22,23,24 7,18,20 | 6 P19223,P50116,P55091,Q64335,Q80WL1,Q9Z0J6 |

|      |                               |                        |    |                                                                                                                                                                                       |
|------|-------------------------------|------------------------|----|---------------------------------------------------------------------------------------------------------------------------------------------------------------------------------------|
| 4691 | 1,3,8,20,2<br>1,22,23,24      | 2,4,5,6,7,1<br>7,18,19 | 1  | P50116                                                                                                                                                                                |
| 4692 | 1,3,17,18,<br>19,20,21,2<br>2 | 2,4,5,6,7,8<br>,23,24  | 9  | BOLT89,O54858,P20760,P20761,P20762,P50115,P50116,Q63532,Q6P6R2                                                                                                                        |
| 4693 | 1,3,17,18,<br>19,20,21,2<br>3 | 2,4,5,6,7,8<br>,22,24  | 8  | O54858,P20760,P23593,P30919,P50115,P50116,Q6P6R2,Q99041                                                                                                                               |
| 4694 | 1,3,17,18,<br>19,20,21,2<br>4 | 2,4,5,6,7,8<br>,22,23  | 11 | BOLT89,O54858,P20760,P20761,P20762,P23593,P42854,P50115,P50116,Q63532,Q99041                                                                                                          |
| 4695 | 1,3,17,18,<br>19,20,22,2<br>3 | 2,4,5,6,7,8<br>,21,24  | 11 | O54858,P00714,P02631,P22273,P30919,P36860,P50115,P50116,P70549,Q00715,Q63474                                                                                                          |
| 4696 | 1,3,17,18,<br>19,20,22,2<br>4 | 2,4,5,6,7,8<br>,21,23  | 10 | O54858,P02631,P20761,P20762,P36860,P42854,P50115,P50116,P70549,Q63532                                                                                                                 |
| 4697 | 1,3,17,18,<br>19,20,23,2<br>4 | 2,4,5,6,7,8<br>,21,22  | 8  | O54858,P02631,P50115,P50116,P70549,Q00715,Q6AYC4,Q99041                                                                                                                               |
| 4698 | 1,3,17,18,<br>19,21,22,2<br>3 | 2,4,5,6,7,8<br>,20,24  | 15 | D4A5U3,O54858,P00714,P02091,P02780,P11598,P12020,P22273,P22282,P50115,P50116,P50280,P82471,Q4G075,Q6TMA8                                                                              |
| 4699 | 1,3,17,18,<br>19,21,22,2<br>4 | 2,4,5,6,7,8<br>,20,23  | 16 | D4A5U3,O54858,P02091,P02780,P12020,P17559,P20761,P20762,P22273,P25031,P42854,P50115,P50116,P50280,P70549,Q4G075                                                                       |
| 4700 | 1,3,17,18,<br>19,21,23,2<br>4 | 2,4,5,6,7,8<br>,20,22  | 15 | D4A5U3,O54858,P02780,P12020,P22273,P23593,P25031,P42854,P50115,P50116,P50280,P70549,Q4G075,Q99041,Q9Z0J6                                                                              |
| 4701 | 1,3,17,18,<br>19,22,23,2<br>4 | 2,4,5,6,7,8<br>,20,21  | 26 | D4A5U3,P00714,P02091,P02454,P02631,P02780,P06760,P06761,P11598,P12020,P22273,P22282,P25031,P50115,P50116,P50280,P62804,P70549,P97697,Q00715,Q4G075,Q63617,Q99041,Q9QZQ5,Q9R0T3,Q9Z0J6 |
| 4702 | 1,3,17,18,<br>20,21,22,2<br>3 | 2,4,5,6,7,8<br>,19,24  | 6  | O54858,P00714,P22282,P50115,P50116,Q6TMA8                                                                                                                                             |
| 4703 | 1,3,17,18,<br>20,21,22,2<br>4 | 2,4,5,6,7,8<br>,19,23  | 9  | O54858,P20760,P20761,P20762,P42854,P50115,P50116,Q8CJD3,Q99041                                                                                                                        |
| 4704 | 1,3,17,18,<br>20,21,23,2<br>4 | 2,4,5,6,7,8<br>,19,22  | 5  | O54858,P42854,P50115,P50116,Q99041                                                                                                                                                    |



|      |                               |                       |    |                                                                                                                                                                  |
|------|-------------------------------|-----------------------|----|------------------------------------------------------------------------------------------------------------------------------------------------------------------|
| 4705 | 1,3,17,18,<br>20,22,23,2<br>4 | 2,4,5,6,7,8<br>,19,21 | 13 | P00714,P02631,P06760,P06761,P22273,P22282,P50115,P50116,P62804,P70549,Q00715,Q99041,Q9QZQ5                                                                       |
| 4706 | 1,3,17,18,<br>21,22,23,2<br>4 | 2,4,5,6,7,8<br>,19,20 | 19 | D4A5U3,P00714,P02780,P06761,P11598,P12020,P22273,P22282,P25031,P42854,P50115,P50116,P50280,Q4G075,Q5I0D1,Q63617,Q6TMA8,Q99041,Q9R0T3                             |
| 4707 | 1,3,17,19,<br>20,21,22,2<br>3 | 2,4,5,6,7,8<br>,18,24 | 6  | O54858,P02091,P20762,P50115,P50116,Q9QZQ5                                                                                                                        |
| 4708 | 1,3,17,19,<br>20,21,22,2<br>4 | 2,4,5,6,7,8<br>,18,23 | 11 | O54858,O70594,P02091,P16636,P20760,P20761,P20762,P50115,P50116,Q63532,Q9JJ50                                                                                     |
| 4709 | 1,3,17,19,<br>20,21,23,2<br>4 | 2,4,5,6,7,8<br>,18,22 | 8  | O54858,P16636,P20762,P23593,P50115,P50116,Q99041,Q9QZQ5                                                                                                          |
| 4710 | 1,3,17,19,<br>20,22,23,2<br>4 | 2,4,5,6,7,8<br>,18,21 | 14 | O89117,P02091,P02454,P02631,P20762,P22273,P36860,P50115,P50116,P62804,P70549,Q00715,Q99041,Q9QZQ5                                                                |
| 4711 | 1,3,17,19,<br>21,22,23,2<br>4 | 2,4,5,6,7,8<br>,18,20 | 23 | D4A5U3,P01946,P02091,P02454,P02780,P06761,P06911,P11598,P12020,P17559,P20762,P22273,P22282,P25031,P50115,P50116,P50280,P70549,Q4G075,Q5GRG2,Q6RY07,Q9QZQ5,Q9Z0J6 |
| 4712 | 1,3,17,20,<br>21,22,23,2<br>4 | 2,4,5,6,7,8<br>,18,19 | 6  | P20762,P22282,P50115,P50116,Q99041,Q9QZQ5                                                                                                                        |
| 4713 | 1,3,18,19,<br>20,21,22,2<br>3 | 2,4,5,6,7,8<br>,17,24 | 7  | O54858,P01039,P20760,P36860,P50115,P50116,Q9QZQ5                                                                                                                 |
| 4714 | 1,3,18,19,<br>20,21,22,2<br>4 | 2,4,5,6,7,8<br>,17,23 | 7  | O54858,O70594,P20760,P20761,P20762,P50115,P50116                                                                                                                 |
| 4715 | 1,3,18,19,<br>20,21,23,2<br>4 | 2,4,5,6,7,8<br>,17,22 | 8  | O54858,P20760,P23593,P50115,P50116,Q99041,Q9QZQ5,Q9Z0J6                                                                                                          |
| 4716 | 1,3,18,19,<br>20,22,23,2<br>4 | 2,4,5,6,7,8<br>,17,21 | 12 | O70594,P02454,P02631,P06760,P22273,P36860,P50115,P50116,P70549,Q00715,Q9QX74,Q9QZQ5                                                                              |
| 4717 | 1,3,18,19,<br>21,22,23,2<br>4 | 2,4,5,6,7,8<br>,17,20 | 23 | D4A5U3,P02454,P02780,P06911,P11598,P12020,P17559,P19223,P22273,P22282,P25031,P50115,P50116,P50280,P55091,P55281,P97697,Q01205,Q4G075,Q5GRG2,Q9QZQ5,Q9R0T3,Q9Z0J6 |

|      |                               |                               |    |                                                                                                                                                                                                     |
|------|-------------------------------|-------------------------------|----|-----------------------------------------------------------------------------------------------------------------------------------------------------------------------------------------------------|
| 4718 | 1,3,18,20,<br>21,22,23,2<br>4 | 2,4,5,6,7,8<br>,17,19         | 7  | O70594,P22282,P50115,P50116,P52590,Q6TMA8,Q9QZQ5                                                                                                                                                    |
| 4719 | 1,3,19,20,<br>21,22,23,2<br>4 | 2,4,5,6,7,8<br>,17,18         | 10 | O70594,P02454,P16636,P20762,P50115,P50116,Q64335,Q99PP0,Q9QZQ5,Q9Z0J6                                                                                                                               |
| 4720 | 1,4,5,6,7,8<br>,17,18         | 2,3,19,20,<br>21,22,23,2<br>4 | 7  | O70594,P13432,P18418,P22282,P49134,Q64335,Q99041                                                                                                                                                    |
| 4721 | 1,4,5,6,7,8<br>,17,19         | 2,3,18,20,<br>21,22,23,2<br>4 | 9  | P06761,P13432,P18418,P22282,P50115,P50116,P52590,Q99041,Q9QX74                                                                                                                                      |
| 4722 | 1,4,5,6,7,8<br>,17,20         | 2,3,18,19,<br>21,22,23,2<br>4 | 28 | D4A5U3,P02780,P06761,P06911,P11598,P12020,P13432,P18418,P19223,P19629,P22273,P22282,P22283,P25031,P46462,P50116,P97697,Q4FZU2,Q4G075,Q5GRG2,Q62946,Q6IMF3,Q6P6Q2,Q99041,Q9JHB9,Q9JI85,Q9ROT3,Q9Z0J6 |
| 4723 | 1,4,5,6,7,8<br>,17,21         | 2,3,18,19,<br>20,22,23,2<br>4 | 16 | P06760,P06761,P11598,P13432,P18418,P22282,P36860,P50115,P50116,Q4FZU2,Q63474,Q63493,Q6IMF3,Q6P6Q2,Q99041,Q9QX74                                                                                     |
| 4724 | 1,4,5,6,7,8<br>,17,22         | 2,3,18,19,<br>20,21,23,2<br>4 | 6  | P13432,P18418,P23593,P49134,Q99041,Q9Z0J6                                                                                                                                                           |
| 4725 | 1,4,5,6,7,8<br>,17,23         | 2,3,18,19,<br>20,21,22,2<br>4 | 7  | O70594,P13432,P18418,P20760,P49134,P50115,Q99041                                                                                                                                                    |
| 4726 | 1,4,5,6,7,8<br>,17,24         | 2,3,18,19,<br>20,21,22,2<br>3 | 10 | P13432,P18418,P22282,P23593,P36860,P49134,Q4FZU2,Q63474,Q6IMF3,Q6P6Q2                                                                                                                               |
| 4727 | 1,4,5,6,7,8<br>,18,19         | 2,3,17,20,<br>21,22,23,2<br>4 | 6  | P06761,P11598,P13432,P18418,P22282,Q99041                                                                                                                                                           |
| 4728 | 1,4,5,6,7,8<br>,18,20         | 2,3,17,19,<br>21,22,23,2<br>4 | 22 | P02780,P06761,P06911,P11598,P12020,P13432,P18418,P19629,P22273,P22282,P22283,P25031,P31044,P50280,Q03191,Q4G075,Q5GRG2,Q99041,Q9JHB9,Q9QW07,Q9ROT3,Q9Z0J6                                           |
| 4729 | 1,4,5,6,7,8<br>,18,21         | 2,3,17,19,<br>20,22,23,2<br>4 | 10 | O89117,P06761,P11598,P13432,P18418,P22273,P22282,P36860,P49134,Q99041                                                                                                                               |
| 4730 | 1,4,5,6,7,8<br>,18,22         | 2,3,17,19,<br>20,21,23,2<br>4 | 8  | O54858,P13432,P18418,P23593,P27590,P49134,Q99041,Q9WVK7                                                                                                                                             |

|      |                       |                               |    |                                                                                                                                                                                                                                                                                              |
|------|-----------------------|-------------------------------|----|----------------------------------------------------------------------------------------------------------------------------------------------------------------------------------------------------------------------------------------------------------------------------------------------|
| 4731 | 1,4,5,6,7,8<br>,18,23 | 2,3,17,19,<br>20,21,22,2<br>4 | 5  | O70594,P18418,P49134,Q99041,Q9WVK7                                                                                                                                                                                                                                                           |
| 4732 | 1,4,5,6,7,8<br>,18,24 | 2,3,17,19,<br>20,21,22,2<br>3 | 7  | P13432,P18418,P22282,P36860,P49134,Q99041,Q9WVK7                                                                                                                                                                                                                                             |
| 4733 | 1,4,5,6,7,8<br>,19,20 | 2,3,17,18,<br>21,22,23,2<br>4 | 33 | P00714,P02780,P06761,P06911,P08723,P0C0A9,P11598,P12020,P18418,P19218,P19629,P2227<br>3,P22282,P22283,P25031,P31044,P36374,P46462,P50280,Q4G075,Q5GRG2,Q5I0D1,Q5M8C6,Q<br>63493,Q63617,Q6P6Q2,Q6RUV5,Q812E4,Q99041,Q9JHB9,Q9JI85,Q9QW07,Q9R0T3                                               |
| 4734 | 1,4,5,6,7,8<br>,19,21 | 2,3,17,18,<br>20,22,23,2<br>4 | 20 | P00714,P06760,P06761,P0C0A9,P11598,P18418,P19218,P22282,P22283,P35952,P50115,P5259<br>0,Q63474,Q63493,Q63617,Q6IMF3,Q6Q7Y5,Q99041,Q9JI85,Q9R0T3                                                                                                                                              |
| 4735 | 1,4,5,6,7,8<br>,19,22 | 2,3,17,18,<br>20,21,23,2<br>4 | 4  | P18418,P19218,P22282,Q99041                                                                                                                                                                                                                                                                  |
| 4736 | 1,4,5,6,7,8<br>,19,23 | 2,3,17,18,<br>20,21,22,2<br>4 | 7  | P18418,P19218,P20760,P22282,P42854,P50115,Q99041                                                                                                                                                                                                                                             |
| 4737 | 1,4,5,6,7,8<br>,19,24 | 2,3,17,18,<br>20,21,22,2<br>3 | 6  | O54728,P00714,P06761,P18418,P22282,Q99041                                                                                                                                                                                                                                                    |
| 4738 | 1,4,5,6,7,8<br>,20,21 | 2,3,17,18,<br>19,22,23,2<br>4 | 39 | O88917,P00714,P02631,P02780,P06760,P06761,P06911,P07647,P0C0A9,P11598,P12020,P1841<br>8,P19629,P22273,P22282,P22283,P25031,P35952,P46462,P47967,P50116,P55159,Q4FZU2,Q4G<br>075,Q5GRG2,Q5I0D1,Q5M8C6,Q63493,Q63617,Q6AYR9,Q6IMF3,Q6P6Q2,Q812E4,Q8CJ52,Q99<br>041,Q9JHB9,Q9JI85,Q9QW07,Q9R0T3 |
| 4739 | 1,4,5,6,7,8<br>,20,22 | 2,3,17,18,<br>19,21,23,2<br>4 | 18 | P02780,P06761,P06911,P11598,P12020,P18418,P19218,P19629,P22273,P22282,P23593,P25031<br>,Q4G075,Q5GRG2,Q99041,Q9JHB9,Q9QW07,Q9Z0J6                                                                                                                                                            |
| 4740 | 1,4,5,6,7,8<br>,20,23 | 2,3,17,18,<br>19,21,22,2<br>4 | 16 | P02780,P06911,P10758,P11598,P18418,P19629,P22273,P22282,P23739,P25031,Q03191,Q4G07<br>5,Q5GRG2,Q6P6Q2,Q99041,Q9WVK7                                                                                                                                                                          |
| 4741 | 1,4,5,6,7,8<br>,20,24 | 2,3,17,18,<br>19,21,22,2<br>3 | 24 | P02780,P06761,P06911,P08723,P11598,P12020,P18418,P19629,P22273,P22282,P22283,P46462<br>,Q4FZU2,Q4G075,Q5GRG2,Q5M8C6,Q63617,Q6IMF3,Q6P6Q2,Q812E4,Q99041,Q9JHB9,Q9QW<br>07,Q9R0T3                                                                                                              |
| 4742 | 1,4,5,6,7,8<br>,21,22 | 2,3,17,18,<br>19,20,23,2<br>4 | 6  | P18418,P19218,P22282,P36860,P49134,Q99041                                                                                                                                                                                                                                                    |
| 4743 | 1,4,5,6,7,8<br>,21,23 | 2,3,17,18,<br>19,20,22,2<br>4 | 6  | P18418,P19629,P36860,P49134,Q63474,Q99041                                                                                                                                                                                                                                                    |

|      |                        |                               |    |                                                                                                       |
|------|------------------------|-------------------------------|----|-------------------------------------------------------------------------------------------------------|
| 4744 | 1,4,5,6,7,8<br>,21,24  | 2,3,17,18,<br>19,20,22,2<br>3 | 14 | P00714,P02782,P11598,P18418,P22282,P30919,P36860,P49134,Q4FZU2,Q63474,Q6AYR9,Q6IM<br>F3,Q6P6Q2,Q99041 |
| 4745 | 1,4,5,6,7,8<br>,22,23  | 2,3,17,18,<br>19,20,21,2<br>4 | 8  | O54858,P19218,P20760,P23593,P49134,Q63532,Q99041,Q9WVK7                                               |
| 4746 | 1,4,5,6,7,8<br>,22,24  | 2,3,17,18,<br>19,20,21,2<br>3 | 7  | O54858,P18418,P23593,P49134,Q6P6R2,Q99041,Q9WVK7                                                      |
| 4747 | 1,4,5,6,7,8<br>,23,24  | 2,3,17,18,<br>19,20,21,2<br>2 | 10 | O54858,P18418,P20760,P25809,P36860,P49134,Q63474,Q6P6Q2,Q99041,Q9WVK7                                 |
| 4748 | 1,4,5,6,7,1<br>7,18,19 | 2,3,8,20,2<br>1,22,23,24      | 1  | P00762                                                                                                |
| 4749 | 1,4,5,6,7,1<br>7,18,20 | 2,3,8,19,2<br>1,22,23,24      | 3  | P11598,Q03191,Q9Z0J6                                                                                  |
| 4750 | 1,4,5,6,7,1<br>7,18,21 | 2,3,8,19,2<br>0,22,23,24      | 3  | B1H234,P05539,P36860                                                                                  |
| 4751 | 1,4,5,6,7,1<br>7,18,22 | 2,3,8,19,2<br>0,21,23,24      | 1  | Q9Z0J6                                                                                                |
| 4752 | 1,4,5,6,7,1<br>7,18,23 | 2,3,8,19,2<br>0,21,22,24      | 0  |                                                                                                       |
| 4753 | 1,4,5,6,7,1<br>7,18,24 | 2,3,8,19,2<br>0,21,22,23      | 1  | P36860                                                                                                |
| 4754 | 1,4,5,6,7,1<br>7,19,20 | 2,3,8,18,2<br>1,22,23,24      | 6  | P11598,P22283,P36374,Q63617,Q9R0T3,Q9Z0J6                                                             |
| 4755 | 1,4,5,6,7,1<br>7,19,21 | 2,3,8,18,2<br>0,22,23,24      | 5  | B1H234,P05539,P36860,Q5QE79,Q9R168                                                                    |
| 4756 | 1,4,5,6,7,1<br>7,19,22 | 2,3,8,18,2<br>0,21,23,24      | 1  | Q9R168                                                                                                |
| 4757 | 1,4,5,6,7,1<br>7,19,23 | 2,3,8,18,2<br>0,21,22,24      | 1  | P25809                                                                                                |
| 4758 | 1,4,5,6,7,1<br>7,19,24 | 2,3,8,18,2<br>0,21,22,23      | 2  | P08721,P25809                                                                                         |
| 4759 | 1,4,5,6,7,1<br>7,20,21 | 2,3,8,18,1<br>9,22,23,24      | 8  | P05539,P11598,P19223,P22283,P36860,Q63617,Q9R0T3,Q9Z0J6                                               |
| 4760 | 1,4,5,6,7,1<br>7,20,22 | 2,3,8,18,1<br>9,21,23,24      | 1  | Q9Z0J6                                                                                                |
| 4761 | 1,4,5,6,7,1<br>7,20,23 | 2,3,8,18,1<br>9,21,22,24      | 2  | P23739,Q03191                                                                                         |

|      |                        |                          |   |                                                         |
|------|------------------------|--------------------------|---|---------------------------------------------------------|
| 4762 | 1,4,5,6,7,1<br>7,20,24 | 2,3,8,18,1<br>9,21,22,23 | 2 | P11598,Q9Z0J6                                           |
| 4763 | 1,4,5,6,7,1<br>7,21,22 | 2,3,8,18,1<br>9,20,23,24 | 4 | P05539,P36860,Q9R168,Q9Z0J6                             |
| 4764 | 1,4,5,6,7,1<br>7,21,23 | 2,3,8,18,1<br>9,20,22,24 | 3 | P36860,Q63474,Q9R168                                    |
| 4765 | 1,4,5,6,7,1<br>7,21,24 | 2,3,8,18,1<br>9,20,22,23 | 5 | B1H234,P05539,P36860,Q63474,Q9R168                      |
| 4766 | 1,4,5,6,7,1<br>7,22,23 | 2,3,8,18,1<br>9,20,21,24 | 2 | P25809,Q9R168                                           |
| 4767 | 1,4,5,6,7,1<br>7,22,24 | 2,3,8,18,1<br>9,20,21,23 | 4 | P25809,P36860,Q9R168,Q9Z0J6                             |
| 4768 | 1,4,5,6,7,1<br>7,23,24 | 2,3,8,18,1<br>9,20,21,22 | 2 | P25809,P36860                                           |
| 4769 | 1,4,5,6,7,1<br>8,19,20 | 2,3,8,17,2<br>1,22,23,24 | 8 | P02780,P11598,P22283,P36374,P97840,Q5I0D1,Q63617,Q9R0T3 |
| 4770 | 1,4,5,6,7,1<br>8,19,21 | 2,3,8,17,2<br>0,22,23,24 | 3 | B1H234,P11598,P36376                                    |
| 4771 | 1,4,5,6,7,1<br>8,19,22 | 2,3,8,17,2<br>0,21,23,24 | 2 | P36376,Q99041                                           |
| 4772 | 1,4,5,6,7,1<br>8,19,23 | 2,3,8,17,2<br>0,21,22,24 | 0 |                                                         |
| 4773 | 1,4,5,6,7,1<br>8,19,24 | 2,3,8,17,2<br>0,21,22,23 | 2 | P36376,P63029                                           |
| 4774 | 1,4,5,6,7,1<br>8,20,21 | 2,3,8,17,1<br>9,22,23,24 | 8 | B1H234,P11598,P22283,P47967,P97840,Q03191,Q63617,Q9Z0J6 |
| 4775 | 1,4,5,6,7,1<br>8,20,22 | 2,3,8,17,1<br>9,21,23,24 | 5 | P11598,Q03191,Q5PQL7,Q9WVK7,Q9Z0J6                      |
| 4776 | 1,4,5,6,7,1<br>8,20,23 | 2,3,8,17,1<br>9,21,22,24 | 4 | P10758,P11598,Q03191,Q9WVK7                             |
| 4777 | 1,4,5,6,7,1<br>8,20,24 | 2,3,8,17,1<br>9,21,22,23 | 4 | P11598,Q03191,Q9WVK7,Q9Z0J6                             |
| 4778 | 1,4,5,6,7,1<br>8,21,22 | 2,3,8,17,1<br>9,20,23,24 | 3 | B1H234,P36376,P36860                                    |
| 4779 | 1,4,5,6,7,1<br>8,21,23 | 2,3,8,17,1<br>9,20,22,24 | 3 | O89117,P36860,Q03191                                    |
| 4780 | 1,4,5,6,7,1<br>8,21,24 | 2,3,8,17,1<br>9,20,22,23 | 4 | B1H234,O89117,P36376,P36860                             |
| 4781 | 1,4,5,6,7,1<br>8,22,23 | 2,3,8,17,1<br>9,20,21,24 | 7 | P13676,P25809,P97675,Q03191,Q6P6R2,Q9EQS0,Q9WVK7        |

|      |                        |                          |    |                                                                                                       |
|------|------------------------|--------------------------|----|-------------------------------------------------------------------------------------------------------|
| 4782 | 1,4,5,6,7,1<br>8,22,24 | 2,3,8,17,1<br>9,20,21,23 | 7  | P13676,P22006,P25809,P36376,P49134,Q6P6R2,Q9WVK7                                                      |
| 4783 | 1,4,5,6,7,1<br>8,23,24 | 2,3,8,17,1<br>9,20,21,22 | 4  | O89117,P25809,Q6P6R2,Q9WVK7                                                                           |
| 4784 | 1,4,5,6,7,1<br>9,20,21 | 2,3,8,17,1<br>8,22,23,24 | 14 | B1H234,O35547,P00714,P02780,P07647,P11598,P22283,P36374,P47967,P55159,P97840,Q5I0D<br>1,Q63617,Q9R0T3 |
| 4785 | 1,4,5,6,7,1<br>9,20,22 | 2,3,8,17,1<br>8,21,23,24 | 6  | P11598,P19218,Q5PQL7,Q63617,Q99041,Q9Z0J6                                                             |
| 4786 | 1,4,5,6,7,1<br>9,20,23 | 2,3,8,17,1<br>8,21,22,24 | 4  | P10758,P11598,P23739,Q63617                                                                           |
| 4787 | 1,4,5,6,7,1<br>9,20,24 | 2,3,8,17,1<br>8,21,22,23 | 5  | P11598,P22283,P36374,Q63617,Q9R0T3                                                                    |
| 4788 | 1,4,5,6,7,1<br>9,21,22 | 2,3,8,17,1<br>8,20,23,24 | 5  | B1H234,P19218,P36376,Q99041,Q9R168                                                                    |
| 4789 | 1,4,5,6,7,1<br>9,21,23 | 2,3,8,17,1<br>8,20,22,24 | 0  |                                                                                                       |
| 4790 | 1,4,5,6,7,1<br>9,21,24 | 2,3,8,17,1<br>8,20,22,23 | 6  | B1H234,P00714,P36376,P36860,Q62761;Q62762;Q62763,Q63474                                               |
| 4791 | 1,4,5,6,7,1<br>9,22,23 | 2,3,8,17,1<br>8,20,21,24 | 5  | P19218,P25809,Q811M5,Q99041,Q9EQS0                                                                    |
| 4792 | 1,4,5,6,7,1<br>9,22,24 | 2,3,8,17,1<br>8,20,21,23 | 2  | P25809,P36376                                                                                         |
| 4793 | 1,4,5,6,7,1<br>9,23,24 | 2,3,8,17,1<br>8,20,21,22 | 1  | P25809                                                                                                |
| 4794 | 1,4,5,6,7,2<br>0,21,22 | 2,3,8,17,1<br>8,19,23,24 | 7  | P11598,P19218,Q03191,Q5PQL7,Q63617,Q99041,Q9Z0J6                                                      |
| 4795 | 1,4,5,6,7,2<br>0,21,23 | 2,3,8,17,1<br>8,19,22,24 | 3  | P10758,P11598,Q03191                                                                                  |
| 4796 | 1,4,5,6,7,2<br>0,21,24 | 2,3,8,17,1<br>8,19,22,23 | 6  | B1H234,P07647,P11598,P22283,P36860,Q63617                                                             |
| 4797 | 1,4,5,6,7,2<br>0,22,23 | 2,3,8,17,1<br>8,19,21,24 | 4  | P19218,P23739,Q03191,Q9WVK7                                                                           |
| 4798 | 1,4,5,6,7,2<br>0,22,24 | 2,3,8,17,1<br>8,19,21,23 | 4  | P22006,Q03191,Q9WVK7,Q9Z0J6                                                                           |
| 4799 | 1,4,5,6,7,2<br>0,23,24 | 2,3,8,17,1<br>8,19,21,22 | 5  | P10758,P23739,Q03191,Q9QYP1,Q9WVK7                                                                    |
| 4800 | 1,4,5,6,7,2<br>1,22,23 | 2,3,8,17,1<br>8,19,20,24 | 2  | P36860,Q9R168                                                                                         |
| 4801 | 1,4,5,6,7,2<br>1,22,24 | 2,3,8,17,1<br>8,19,20,23 | 4  | B1H234,P36376,P36860,Q9R168                                                                           |

|      |                        |                          |    |                                                                                     |
|------|------------------------|--------------------------|----|-------------------------------------------------------------------------------------|
| 4802 | 1,4,5,6,7,2<br>1,23,24 | 2,3,8,17,1<br>8,19,20,22 | 4  | O89117,P25809,P36860,Q63474                                                         |
| 4803 | 1,4,5,6,7,2<br>2,23,24 | 2,3,8,17,1<br>8,19,20,21 | 7  | P10719,P13676,P25809,P62804,Q6P6R2,Q9EQS0,Q9WVK7                                    |
| 4804 | 1,4,5,6,8,1<br>7,18,19 | 2,3,7,20,2<br>1,22,23,24 | 2  | P13432,P18418                                                                       |
| 4805 | 1,4,5,6,8,1<br>7,18,20 | 2,3,7,19,2<br>1,22,23,24 | 6  | P06911,P12020,P13432,P18418,Q5GRG2,Q9Z0J6                                           |
| 4806 | 1,4,5,6,8,1<br>7,18,21 | 2,3,7,19,2<br>0,22,23,24 | 3  | P13432,P18418,P36860                                                                |
| 4807 | 1,4,5,6,8,1<br>7,18,22 | 2,3,7,19,2<br>0,21,23,24 | 1  | P13432                                                                              |
| 4808 | 1,4,5,6,8,1<br>7,18,23 | 2,3,7,19,2<br>0,21,22,24 | 2  | P13432,P18418                                                                       |
| 4809 | 1,4,5,6,8,1<br>7,18,24 | 2,3,7,19,2<br>0,21,22,23 | 2  | P13432,P18418                                                                       |
| 4810 | 1,4,5,6,8,1<br>7,19,20 | 2,3,7,18,2<br>1,22,23,24 | 9  | B0LT89,P06911,P13432,P18418,P22282,P36374,Q5GRG2,Q6RUV5,Q9JI85                      |
| 4811 | 1,4,5,6,8,1<br>7,19,21 | 2,3,7,18,2<br>0,22,23,24 | 3  | P13432,P18418,Q63474                                                                |
| 4812 | 1,4,5,6,8,1<br>7,19,22 | 2,3,7,18,2<br>0,21,23,24 | 2  | P00507,P13432                                                                       |
| 4813 | 1,4,5,6,8,1<br>7,19,23 | 2,3,7,18,2<br>0,21,22,24 | 0  |                                                                                     |
| 4814 | 1,4,5,6,8,1<br>7,19,24 | 2,3,7,18,2<br>0,21,22,23 | 3  | O54728,P13432,P18418                                                                |
| 4815 | 1,4,5,6,8,1<br>7,20,21 | 2,3,7,18,1<br>9,22,23,24 | 12 | P06911,P13432,P18418,P19223,P20766,P36375,Q10758,Q4FZU2,Q5GRG2,Q6IMF3,Q6P6Q2,Q9JI85 |
| 4816 | 1,4,5,6,8,1<br>7,20,22 | 2,3,7,18,1<br>9,21,23,24 | 5  | P06911,P13432,P20766,Q5GRG2,Q9Z0J6                                                  |
| 4817 | 1,4,5,6,8,1<br>7,20,23 | 2,3,7,18,1<br>9,21,22,24 | 6  | P06911,P13432,P20766,P23739,P25031,Q6P6Q2                                           |
| 4818 | 1,4,5,6,8,1<br>7,20,24 | 2,3,7,18,1<br>9,21,22,23 | 7  | P06911,P13432,P18418,Q4FZU2,Q5GRG2,Q6IMF3,Q6P6Q2                                    |
| 4819 | 1,4,5,6,8,1<br>7,21,22 | 2,3,7,18,1<br>9,20,23,24 | 1  | P20766                                                                              |
| 4820 | 1,4,5,6,8,1<br>7,21,23 | 2,3,7,18,1<br>9,20,22,24 | 3  | P20766,P36860,Q63474                                                                |
| 4821 | 1,4,5,6,8,1<br>7,21,24 | 2,3,7,18,1<br>9,20,22,23 | 7  | P13432,P18418,P36860,Q4FZU2,Q63474,Q6IMF3,Q6P6Q2                                    |

|      |                        |                          |    |                                                                                                                            |
|------|------------------------|--------------------------|----|----------------------------------------------------------------------------------------------------------------------------|
| 4822 | 1,4,5,6,8,1<br>7,22,23 | 2,3,7,18,1<br>9,20,21,24 | 3  | P00507,P20760,P20766                                                                                                       |
| 4823 | 1,4,5,6,8,1<br>7,22,24 | 2,3,7,18,1<br>9,20,21,23 | 3  | P13432,P20766,P23593                                                                                                       |
| 4824 | 1,4,5,6,8,1<br>7,23,24 | 2,3,7,18,1<br>9,20,21,22 | 2  | P20760,Q6P6Q2                                                                                                              |
| 4825 | 1,4,5,6,8,1<br>8,19,20 | 2,3,7,17,2<br>1,22,23,24 | 8  | P02780,P13432,P18418,P22282,P36374,Q9JI85,Q9QW07,Q9R168                                                                    |
| 4826 | 1,4,5,6,8,1<br>8,19,21 | 2,3,7,17,2<br>0,22,23,24 | 1  | P18418                                                                                                                     |
| 4827 | 1,4,5,6,8,1<br>8,19,22 | 2,3,7,17,2<br>0,21,23,24 | 2  | P00507,Q6AY61                                                                                                              |
| 4828 | 1,4,5,6,8,1<br>8,19,23 | 2,3,7,17,2<br>0,21,22,24 | 0  |                                                                                                                            |
| 4829 | 1,4,5,6,8,1<br>8,19,24 | 2,3,7,17,2<br>0,21,22,23 | 2  | O54728,P18418                                                                                                              |
| 4830 | 1,4,5,6,8,1<br>8,20,21 | 2,3,7,17,1<br>9,22,23,24 | 6  | P02780,P13432,P18418,P22273,P54921,Q9JI85                                                                                  |
| 4831 | 1,4,5,6,8,1<br>8,20,22 | 2,3,7,17,1<br>9,21,23,24 | 5  | P06911,P12020,P13432,P54921,Q6AY61                                                                                         |
| 4832 | 1,4,5,6,8,1<br>8,20,23 | 2,3,7,17,1<br>9,21,22,24 | 7  | P13432,P18418,P23739,P25031,P54921,Q9R168,Q9WVK7                                                                           |
| 4833 | 1,4,5,6,8,1<br>8,20,24 | 2,3,7,17,1<br>9,21,22,23 | 5  | P06911,P13432,P18418,Q9QW07,Q9R168                                                                                         |
| 4834 | 1,4,5,6,8,1<br>8,21,22 | 2,3,7,17,1<br>9,20,23,24 | 1  | P54921                                                                                                                     |
| 4835 | 1,4,5,6,8,1<br>8,21,23 | 2,3,7,17,1<br>9,20,22,24 | 2  | O89117,P54921                                                                                                              |
| 4836 | 1,4,5,6,8,1<br>8,21,24 | 2,3,7,17,1<br>9,20,22,23 | 3  | O89117,P18418,P36860                                                                                                       |
| 4837 | 1,4,5,6,8,1<br>8,22,23 | 2,3,7,17,1<br>9,20,21,24 | 6  | P00507,P49134,P54921,Q63532,Q6AY61,Q9WVK7                                                                                  |
| 4838 | 1,4,5,6,8,1<br>8,22,24 | 2,3,7,17,1<br>9,20,21,23 | 2  | P49134,Q9WVK7                                                                                                              |
| 4839 | 1,4,5,6,8,1<br>8,23,24 | 2,3,7,17,1<br>9,20,21,22 | 2  | P49134,Q9WVK7                                                                                                              |
| 4840 | 1,4,5,6,8,1<br>9,20,21 | 2,3,7,17,1<br>8,22,23,24 | 17 | O35547,P02780,P04905,P14046,P18418,P19218,P20766,P22282,P22283,P35952,P36374,P4646<br>2,P61589,Q5I0D1,Q63493,Q6P6Q2,Q9JI85 |
| 4841 | 1,4,5,6,8,1<br>9,20,22 | 2,3,7,17,1<br>8,21,23,24 | 6  | P02780,P15399,P19218,P20766,P36374,Q99041                                                                                  |



|      |                         |                          |    |                                                                                     |
|------|-------------------------|--------------------------|----|-------------------------------------------------------------------------------------|
| 4842 | 1,4,5,6,8,1<br>9,20,23  | 2,3,7,17,1<br>8,21,22,24 | 4  | P10758,P19218,P23739,P25031                                                         |
| 4843 | 1,4,5,6,8,1<br>9,20,24  | 2,3,7,17,1<br>8,21,22,23 | 12 | O35547,O54728,P02780,P08723,P18418,P22282,P36374,P60905,Q6P6Q2,Q6RUV5,Q9JI85,Q9QW07 |
| 4844 | 1,4,5,6,8,1<br>9,21,22  | 2,3,7,17,1<br>8,20,23,24 | 4  | P19218,P20766,P30919,Q99041                                                         |
| 4845 | 1,4,5,6,8,1<br>9,21,23  | 2,3,7,17,1<br>8,20,22,24 | 1  | Q63474                                                                              |
| 4846 | 1,4,5,6,8,1<br>9,21,24  | 2,3,7,17,1<br>8,20,22,23 | 6  | O54728,P18418,P30919,Q10743,Q63474,Q6P6Q2                                           |
| 4847 | 1,4,5,6,8,1<br>9,22,23  | 2,3,7,17,1<br>8,20,21,24 | 4  | P00507,P19218,Q6AY61,Q811M5                                                         |
| 4848 | 1,4,5,6,8,1<br>9,22,24  | 2,3,7,17,1<br>8,20,21,23 | 4  | O54728,P00507,P19218,P30919                                                         |
| 4849 | 1,4,5,6,8,1<br>9,23,24  | 2,3,7,17,1<br>8,20,21,22 | 3  | O54728,P00507,P25809                                                                |
| 4850 | 1,4,5,6,8,2<br>0,21,22  | 2,3,7,17,1<br>8,19,23,24 | 4  | P19218,P20766,P54921,Q99041                                                         |
| 4851 | 1,4,5,6,8,2<br>0,21,23  | 2,3,7,17,1<br>8,19,22,24 | 6  | P19629,P20766,P23739,P25031,P54921,Q6P6Q2                                           |
| 4852 | 1,4,5,6,8,2<br>0,21,24  | 2,3,7,17,1<br>8,19,22,23 | 9  | P02782,P18418,P20766,Q10743,Q4FZU2,Q6AYR9,Q6IMF3,Q6P6Q2,Q9JI85                      |
| 4853 | 1,4,5,6,8,2<br>0,22,23  | 2,3,7,17,1<br>8,19,21,24 | 6  | P19218,P20766,P23739,P25031,P54921,Q6AY61                                           |
| 4854 | 1,4,5,6,8,2<br>0,22,24  | 2,3,7,17,1<br>8,19,21,23 | 4  | P19218,P20766,P22006,Q6P6Q2                                                         |
| 4855 | 1,4,5,6,8,2<br>0,23,24  | 2,3,7,17,1<br>8,19,21,22 | 3  | P23739,Q6P6Q2,Q9WVK7                                                                |
| 4856 | 1,4,5,6,8,2<br>1,22,23  | 2,3,7,17,1<br>8,19,20,24 | 5  | P19218,P20766,P30919,P54921,Q63532                                                  |
| 4857 | 1,4,5,6,8,2<br>1,22,24  | 2,3,7,17,1<br>8,19,20,23 | 4  | P20766,P30919,P36860,Q10743                                                         |
| 4858 | 1,4,5,6,8,2<br>1,23,24  | 2,3,7,17,1<br>8,19,20,22 | 4  | P30919,P36860,Q63474,Q6P6Q2                                                         |
| 4859 | 1,4,5,6,8,2<br>2,23,24  | 2,3,7,17,1<br>8,19,20,21 | 8  | O54858,P00507,P20760,P25809,P30919,P62804,Q6P6R2,Q9WVK7                             |
| 4860 | 1,4,5,6,17,<br>18,19,20 | 2,3,7,8,21,<br>22,23,24  | 2  | P11883,P35280                                                                       |
| 4861 | 1,4,5,6,17,<br>18,19,21 | 2,3,7,8,20,<br>22,23,24  | 1  | P35280                                                                              |

|      |                                              |                               |
|------|----------------------------------------------|-------------------------------|
| 4862 | 1,4,5,6,17, 2,3,7,8,20,<br>18,19,22 21,23,24 | 0                             |
| 4863 | 1,4,5,6,17, 2,3,7,8,20,<br>18,19,23 21,22,24 | 2 P11883,P35280               |
| 4864 | 1,4,5,6,17, 2,3,7,8,20,<br>18,19,24 21,22,23 | 1 P35280                      |
| 4865 | 1,4,5,6,17, 2,3,7,8,19,<br>18,20,21 22,23,24 | 2 P35280,Q9Z0J6               |
| 4866 | 1,4,5,6,17, 2,3,7,8,19,<br>18,20,22 21,23,24 | 2 P11883,Q9Z0J6               |
| 4867 | 1,4,5,6,17, 2,3,7,8,19,<br>18,20,23 21,22,24 | 3 P04355,P11883,P35280        |
| 4868 | 1,4,5,6,17, 2,3,7,8,19,<br>18,20,24 21,22,23 | 3 P11883,P35280,Q9Z0J6        |
| 4869 | 1,4,5,6,17, 2,3,7,8,19,<br>18,21,22 20,23,24 | 0                             |
| 4870 | 1,4,5,6,17, 2,3,7,8,19,<br>18,21,23 20,22,24 | 2 P35280,P36860               |
| 4871 | 1,4,5,6,17, 2,3,7,8,19,<br>18,21,24 20,22,23 | 2 P35280,P36860               |
| 4872 | 1,4,5,6,17, 2,3,7,8,19,<br>18,22,23 20,21,24 | 3 P11883,P62804,Q9EQS0        |
| 4873 | 1,4,5,6,17, 2,3,7,8,19,<br>18,22,24 20,21,23 | 3 P11883,P62804,Q9WTT6        |
| 4874 | 1,4,5,6,17, 2,3,7,8,19,<br>18,23,24 20,21,22 | 3 P11883,P35280,P62804        |
| 4875 | 1,4,5,6,17, 2,3,7,8,18,<br>19,20,21 22,23,24 | 4 B0LT89,P20766,P35280,P36374 |
| 4876 | 1,4,5,6,17, 2,3,7,8,18,<br>19,20,22 21,23,24 | 2 P20766,Q9Z0J6               |
| 4877 | 1,4,5,6,17, 2,3,7,8,18,<br>19,20,23 21,22,24 | 4 P10758,P20766,P23739,P35280 |
| 4878 | 1,4,5,6,17, 2,3,7,8,18,<br>19,20,24 21,22,23 | 2 P35280,P36374               |
| 4879 | 1,4,5,6,17, 2,3,7,8,18,<br>19,21,22 20,23,24 | 1 P20766                      |
| 4880 | 1,4,5,6,17, 2,3,7,8,18,<br>19,21,23 20,22,24 | 2 P20766,P35280               |
| 4881 | 1,4,5,6,17, 2,3,7,8,18,<br>19,21,24 20,22,23 | 2 P35280,Q63474               |

|      |                                              |                                                           |
|------|----------------------------------------------|-----------------------------------------------------------|
| 4882 | 1,4,5,6,17, 2,3,7,8,18,<br>19,22,23 20,21,24 | 6 P00507,P20766,P25809,P62804,Q00715,Q811M5               |
| 4883 | 1,4,5,6,17, 2,3,7,8,18,<br>19,22,24 20,21,23 | 5 P00507,P20766,P25809,P62804,Q00715                      |
| 4884 | 1,4,5,6,17, 2,3,7,8,18,<br>19,23,24 20,21,22 | 4 P25809,P35280,P62804,Q00715                             |
| 4885 | 1,4,5,6,17, 2,3,7,8,18,<br>20,21,22 19,23,24 | 2 P20766,Q9Z0J6                                           |
| 4886 | 1,4,5,6,17, 2,3,7,8,18,<br>20,21,23 19,22,24 | 3 P20766,P23739,P35280                                    |
| 4887 | 1,4,5,6,17, 2,3,7,8,18,<br>20,21,24 19,22,23 | 4 P20766,P35280,P36860,Q9Z0J6                             |
| 4888 | 1,4,5,6,17, 2,3,7,8,18,<br>20,22,23 19,21,24 | 4 P20766,P23739,P62804,Q00715                             |
| 4889 | 1,4,5,6,17, 2,3,7,8,18,<br>20,22,24 19,21,23 | 4 P20766,P22006,P62804,Q9Z0J6                             |
| 4890 | 1,4,5,6,17, 2,3,7,8,18,<br>20,23,24 19,21,22 | 7 P11883,P20766,P23739,P35280,P62804,Q00715,Q9QYP1        |
| 4891 | 1,4,5,6,17, 2,3,7,8,18,<br>21,22,23 19,20,24 | 1 P20766                                                  |
| 4892 | 1,4,5,6,17, 2,3,7,8,18,<br>21,22,24 19,20,23 | 3 P20766,P36860,Q9R168                                    |
| 4893 | 1,4,5,6,17, 2,3,7,8,18,<br>21,23,24 19,20,22 | 4 P20766,P35280,P36860,Q63474                             |
| 4894 | 1,4,5,6,17, 2,3,7,8,18,<br>22,23,24 19,20,21 | 8 P00507,P07335,P20766,P25809,P47967,P62804,Q00715,Q9WTT6 |
| 4895 | 1,4,5,6,18, 2,3,7,8,17,<br>19,20,21 22,23,24 | 2 P35280,Q5PQL7                                           |
| 4896 | 1,4,5,6,18, 2,3,7,8,17,<br>19,20,22 21,23,24 | 1 Q5PQL7                                                  |
| 4897 | 1,4,5,6,18, 2,3,7,8,17,<br>19,20,23 21,22,24 | 3 P10758,P11883,P35280                                    |
| 4898 | 1,4,5,6,18, 2,3,7,8,17,<br>19,20,24 21,22,23 | 1 P35280                                                  |
| 4899 | 1,4,5,6,18, 2,3,7,8,17,<br>19,21,22 20,23,24 | 2 P36376,Q5PQL7                                           |
| 4900 | 1,4,5,6,18, 2,3,7,8,17,<br>19,21,23 20,22,24 | 1 P35280                                                  |
| 4901 | 1,4,5,6,18, 2,3,7,8,17,<br>19,21,24 20,22,23 | 2 P35280,P36376                                           |

|      |                                              |                                                                                                          |
|------|----------------------------------------------|----------------------------------------------------------------------------------------------------------|
| 4902 | 1,4,5,6,18, 2,3,7,8,17,<br>19,22,23 20,21,24 | 6 D4A5U3,P00507,P13676,P25809,Q811M5,Q9EQS0                                                              |
| 4903 | 1,4,5,6,18, 2,3,7,8,17,<br>19,22,24 20,21,23 | 7 P00507,P13676,P22006,P25809,P36376,P62804,Q9WTT6                                                       |
| 4904 | 1,4,5,6,18, 2,3,7,8,17,<br>19,23,24 20,21,22 | 6 D4A5U3,P13676,P25809,P35280,P62804,Q9WTT6                                                              |
| 4905 | 1,4,5,6,18, 2,3,7,8,17,<br>20,21,22 19,23,24 | 3 P54921,Q5PQL7,Q9Z0J6                                                                                   |
| 4906 | 1,4,5,6,18, 2,3,7,8,17,<br>20,21,23 19,22,24 | 2 P35280,P54921                                                                                          |
| 4907 | 1,4,5,6,18, 2,3,7,8,17,<br>20,21,24 19,22,23 | 1 P35280                                                                                                 |
| 4908 | 1,4,5,6,18, 2,3,7,8,17,<br>20,22,23 19,21,24 | 6 P04355,P11883,P54921,Q03191,Q9EQS0,Q9WVK7                                                              |
| 4909 | 1,4,5,6,18, 2,3,7,8,17,<br>20,22,24 19,21,23 | 3 P22006,P62804,Q9WVK7                                                                                   |
| 4910 | 1,4,5,6,18, 2,3,7,8,17,<br>20,23,24 19,21,22 | 8 P04355,P11883,P23739,P35280,P62804,Q5QE79,Q9QYP1,Q9WVK7                                                |
| 4911 | 1,4,5,6,18, 2,3,7,8,17,<br>21,22,23 19,20,24 | 4 P13676,P54921,Q9EQS0,Q9WTT6                                                                            |
| 4912 | 1,4,5,6,18, 2,3,7,8,17,<br>21,22,24 19,20,23 | 3 P13676,P36376,Q9WTT6                                                                                   |
| 4913 | 1,4,5,6,18, 2,3,7,8,17,<br>21,23,24 19,20,22 | 5 O89117,P13676,P35280,P36860,Q9WTT6                                                                     |
| 4914 | 1,4,5,6,18, 2,3,7,8,17,<br>22,23,24 19,20,21 | 14 D4A5U3,P00507,P11883,P13676,P22006,P25809,P62804,Q00715,Q6P6R2,Q811M5,Q9EQS0,Q9<br>QX74,Q9WTT6,Q9WVK7 |
| 4915 | 1,4,5,6,19, 2,3,7,8,17,<br>20,21,22 18,23,24 | 3 P19218,P20766,Q5PQL7                                                                                   |
| 4916 | 1,4,5,6,19, 2,3,7,8,17,<br>20,21,23 18,22,24 | 4 P10758,P20766,P23739,P35280                                                                            |
| 4917 | 1,4,5,6,19, 2,3,7,8,17,<br>20,21,24 18,22,23 | 4 O35547,P20766,P35280,P36374                                                                            |
| 4918 | 1,4,5,6,19, 2,3,7,8,17,<br>20,22,23 18,21,24 | 6 P10758,P19218,P20766,P23739,Q00715,Q811M5                                                              |
| 4919 | 1,4,5,6,19, 2,3,7,8,17,<br>20,22,24 18,21,23 | 3 P20766,P22006,P62804                                                                                   |
| 4920 | 1,4,5,6,19, 2,3,7,8,17,<br>20,23,24 18,21,22 | 4 P10758,P23739,P35280,P62804                                                                            |
| 4921 | 1,4,5,6,19, 2,3,7,8,17,<br>21,22,23 18,20,24 | 3 P13676,P20766,Q811M5                                                                                   |

|      |                                              |                                                                                                                                  |
|------|----------------------------------------------|----------------------------------------------------------------------------------------------------------------------------------|
| 4922 | 1,4,5,6,19, 2,3,7,8,17,<br>21,22,24 18,20,23 | 3 P20766,P30919,P36376                                                                                                           |
| 4923 | 1,4,5,6,19, 2,3,7,8,17,<br>21,23,24 18,20,22 | 3 P25809,P35280,Q63474                                                                                                           |
| 4924 | 1,4,5,6,19, 2,3,7,8,17,<br>22,23,24 18,20,21 | 11 D4A5U3,P00507,P13676,P25809,P62804,Q00715,Q6P6R2,Q811M5,Q9EQS0,Q9QX74,Q9WTT6                                                  |
| 4925 | 1,4,5,6,20, 2,3,7,8,17,<br>21,22,23 18,19,24 | 2 P20766,P54921                                                                                                                  |
| 4926 | 1,4,5,6,20, 2,3,7,8,17,<br>21,22,24 18,19,23 | 2 P20766,P22006                                                                                                                  |
| 4927 | 1,4,5,6,20, 2,3,7,8,17,<br>21,23,24 18,19,22 | 3 P20766,P23739,P35280                                                                                                           |
| 4928 | 1,4,5,6,20, 2,3,7,8,17,<br>22,23,24 18,19,21 | 11 P20766,P22006,P23739,P62804,Q00715,Q05175,Q5QE79,Q66H69,Q6P6R2,Q9QX74,Q9WVK7                                                  |
| 4929 | 1,4,5,6,21, 2,3,7,8,17,<br>22,23,24 18,19,20 | 7 P13676,P20766,P25809,P30919,P36860,Q811M5,Q9WTT6                                                                               |
| 4930 | 1,4,5,7,8,1 2,3,6,20,2<br>7,18,19 1,22,23,24 | 5 P09656,P13432,P20646,Q66H69,Q9QX74                                                                                             |
| 4931 | 1,4,5,7,8,1 2,3,6,19,2<br>7,18,20 1,22,23,24 | 9 P02780,P06911,P13432,P97697,Q4G075,Q6P6Q2,Q811M5,Q9WTT6,Q9Z0J6                                                                 |
| 4932 | 1,4,5,7,8,1 2,3,6,19,2<br>7,18,21 0,22,23,24 | 7 P06760,P22006,P49134,Q6P6Q2,Q811M5,Q9QX74,Q9Z1F2                                                                               |
| 4933 | 1,4,5,7,8,1 2,3,6,19,2<br>7,18,22 0,21,23,24 | 3 P13432,P27590,P49134                                                                                                           |
| 4934 | 1,4,5,7,8,1 2,3,6,19,2<br>7,18,23 0,21,22,24 | 2 P49134,Q9Z0V6                                                                                                                  |
| 4935 | 1,4,5,7,8,1 2,3,6,19,2<br>7,18,24 0,21,22,23 | 4 P13432,P49134,Q4FZU2,Q6P6Q2                                                                                                    |
| 4936 | 1,4,5,7,8,1 2,3,6,18,2<br>7,19,20 1,22,23,24 | 15 P02780,P06760,P06911,P13676,P20646,P22282,P36374,P97697,Q4G075,Q5I0D1,Q6IMF3,Q6P6Q2,Q811M5,Q9QX74,Q9WTT6                      |
| 4937 | 1,4,5,7,8,1 2,3,6,18,2<br>7,19,21 0,22,23,24 | 12 P06760,P20646,P22006,P22282,Q4FZU2,Q63474,Q63493,Q66H69,Q6IMF3,Q6P6Q2,Q99MH3,Q9QX74                                           |
| 4938 | 1,4,5,7,8,1 2,3,6,18,2<br>7,19,22 0,21,23,24 | 1 P20646                                                                                                                         |
| 4939 | 1,4,5,7,8,1 2,3,6,18,2<br>7,19,23 0,21,22,24 | 2 P20646,P21674                                                                                                                  |
| 4940 | 1,4,5,7,8,1 2,3,6,18,2<br>7,19,24 0,21,22,23 | 5 O54728,Q4FZU2,Q6IMF3,Q6P6Q2,Q99MH3                                                                                             |
| 4941 | 1,4,5,7,8,1 2,3,6,18,1<br>7,20,21 9,22,23,24 | 18 D4A5U3,P02780,P06760,P13676,P19223,P22273,P55159,P97697,Q4FZU2,Q4G075,Q63493,Q6IMF3,Q6P6Q2,Q811M5,Q812E4,Q9QX74,Q9WTT6,Q9Z0J6 |

|      |                        |                          |    |                                                                       |
|------|------------------------|--------------------------|----|-----------------------------------------------------------------------|
| 4942 | 1,4,5,7,8,1<br>7,20,22 | 2,3,6,18,1<br>9,21,23,24 | 4  | P06911,Q4G075,Q6P6Q2,Q9Z0J6                                           |
| 4943 | 1,4,5,7,8,1<br>7,20,23 | 2,3,6,18,1<br>9,21,22,24 | 6  | P10758,P23739,P97697,Q4G075,Q6IMF3,Q6P6Q2                             |
| 4944 | 1,4,5,7,8,1<br>7,20,24 | 2,3,6,18,1<br>9,21,22,23 | 8  | P06911,P97697,Q4FZU2,Q4G075,Q6IMF3,Q6P6Q2,Q811M5,Q9JHB9               |
| 4945 | 1,4,5,7,8,1<br>7,21,22 | 2,3,6,18,1<br>9,20,23,24 | 5  | P06760,Q4FZU2,Q6IMF3,Q6P6Q2,Q9QX74                                    |
| 4946 | 1,4,5,7,8,1<br>7,21,23 | 2,3,6,18,1<br>9,20,22,24 | 8  | P06760,P22006,Q4FZU2,Q63474,Q6IMF3,Q6P6Q2,Q9QX74,Q9Z0V6               |
| 4947 | 1,4,5,7,8,1<br>7,21,24 | 2,3,6,18,1<br>9,20,22,23 | 10 | P02782,P06760,P36860,Q4FZU2,Q63474,Q6IMF3,Q6P6Q2,Q811M5,Q99MH3,Q9QX74 |
| 4948 | 1,4,5,7,8,1<br>7,22,23 | 2,3,6,18,1<br>9,20,21,24 | 3  | P27590,P49134,Q68G31                                                  |
| 4949 | 1,4,5,7,8,1<br>7,22,24 | 2,3,6,18,1<br>9,20,21,23 | 3  | P49134,Q4FZU2,Q6P6Q2                                                  |
| 4950 | 1,4,5,7,8,1<br>7,23,24 | 2,3,6,18,1<br>9,20,21,22 | 4  | P49134,Q4FZU2,Q6IMF3,Q6P6Q2                                           |
| 4951 | 1,4,5,7,8,1<br>8,19,20 | 2,3,6,17,2<br>1,22,23,24 | 7  | P02780,P22282,P36374,P47967,P97840,Q4G075,Q5I0D1                      |
| 4952 | 1,4,5,7,8,1<br>8,19,21 | 2,3,6,17,2<br>0,22,23,24 | 5  | O89117,P06760,P22282,P63029,Q66H69                                    |
| 4953 | 1,4,5,7,8,1<br>8,19,22 | 2,3,6,17,2<br>0,21,23,24 | 2  | P27590,P63029                                                         |
| 4954 | 1,4,5,7,8,1<br>8,19,23 | 2,3,6,17,2<br>0,21,22,24 | 1  | P63029                                                                |
| 4955 | 1,4,5,7,8,1<br>8,19,24 | 2,3,6,17,2<br>0,21,22,23 | 3  | O54728,P09656,P63029                                                  |
| 4956 | 1,4,5,7,8,1<br>8,20,21 | 2,3,6,17,1<br>9,22,23,24 | 10 | P02780,P06760,P22273,P22282,P47967,P97840,Q4G075,Q5I0D1,Q6P6Q2,Q811M5 |
| 4957 | 1,4,5,7,8,1<br>8,20,22 | 2,3,6,17,1<br>9,21,23,24 | 4  | P02780,P97840,Q03191,Q4G075                                           |
| 4958 | 1,4,5,7,8,1<br>8,20,23 | 2,3,6,17,1<br>9,21,22,24 | 5  | P10758,P23739,Q03191,Q4G075,Q9WVK7                                    |
| 4959 | 1,4,5,7,8,1<br>8,20,24 | 2,3,6,17,1<br>9,21,22,23 | 4  | P02780,Q4G075,Q6P6Q2,Q9JHB9                                           |
| 4960 | 1,4,5,7,8,1<br>8,21,22 | 2,3,6,17,1<br>9,20,23,24 | 1  | P49134                                                                |
| 4961 | 1,4,5,7,8,1<br>8,21,23 | 2,3,6,17,1<br>9,20,22,24 | 2  | O89117,P49134                                                         |

|      |                        |                          |    |                                                                                                                                                               |
|------|------------------------|--------------------------|----|---------------------------------------------------------------------------------------------------------------------------------------------------------------|
| 4962 | 1,4,5,7,8,1<br>8,21,24 | 2,3,6,17,1<br>9,20,22,23 | 5  | O89117,P36860,P49134,P63029,Q6P6Q2                                                                                                                            |
| 4963 | 1,4,5,7,8,1<br>8,22,23 | 2,3,6,17,1<br>9,20,21,24 | 4  | P27590,P49134,P63029,Q9WVK7                                                                                                                                   |
| 4964 | 1,4,5,7,8,1<br>8,22,24 | 2,3,6,17,1<br>9,20,21,23 | 3  | P49134,P63029,Q9WVK7                                                                                                                                          |
| 4965 | 1,4,5,7,8,1<br>8,23,24 | 2,3,6,17,1<br>9,20,21,22 | 4  | O89117,P49134,P63029,Q9WVK7                                                                                                                                   |
| 4966 | 1,4,5,7,8,1<br>9,20,21 | 2,3,6,17,1<br>8,22,23,24 | 22 | P02780,P04905,P06760,P0C0A9,P22273,P22282,P22283,P36374,P40241,P47967,P55159,P9784<br>0,Q4G075,Q5I0D1,Q5M8C6,Q63493,Q63617,Q6IMF3,Q6P6Q2,Q812E4,Q9R0T3,Q9WTT6 |
| 4967 | 1,4,5,7,8,1<br>9,20,22 | 2,3,6,17,1<br>8,21,23,24 | 7  | P02780,P19218,P22282,P36374,Q4G075,Q5I0D1,Q99041                                                                                                              |
| 4968 | 1,4,5,7,8,1<br>9,20,23 | 2,3,6,17,1<br>8,21,22,24 | 7  | P02780,P10758,P23739,P36374,Q4G075,Q5I0D1,Q812E4                                                                                                              |
| 4969 | 1,4,5,7,8,1<br>9,20,24 | 2,3,6,17,1<br>8,21,22,23 | 12 | O54728,P02780,P08723,P22282,P36374,P60905,Q4G075,Q5I0D1,Q6IMF3,Q6P6Q2,Q812E4,Q9J<br>HB9                                                                       |
| 4970 | 1,4,5,7,8,1<br>9,21,22 | 2,3,6,17,1<br>8,20,23,24 | 3  | P06760,P19218,Q99041                                                                                                                                          |
| 4971 | 1,4,5,7,8,1<br>9,21,23 | 2,3,6,17,1<br>8,20,22,24 | 2  | P06760,Q6IMF3                                                                                                                                                 |
| 4972 | 1,4,5,7,8,1<br>9,21,24 | 2,3,6,17,1<br>8,20,22,23 | 10 | O54728,P02782,P06760,P22282,P63029,Q4FZU2,Q63474,Q6IMF3,Q6P6Q2,Q99MH3                                                                                         |
| 4973 | 1,4,5,7,8,1<br>9,22,23 | 2,3,6,17,1<br>8,20,21,24 | 3  | P19218,P27590,P63029                                                                                                                                          |
| 4974 | 1,4,5,7,8,1<br>9,22,24 | 2,3,6,17,1<br>8,20,21,23 | 2  | O54728,P63029                                                                                                                                                 |
| 4975 | 1,4,5,7,8,1<br>9,23,24 | 2,3,6,17,1<br>8,20,21,22 | 2  | O54728,P63029                                                                                                                                                 |
| 4976 | 1,4,5,7,8,2<br>0,21,22 | 2,3,6,17,1<br>8,19,23,24 | 4  | P02780,P06760,Q4G075,Q6P6Q2                                                                                                                                   |
| 4977 | 1,4,5,7,8,2<br>0,21,23 | 2,3,6,17,1<br>8,19,22,24 | 9  | P02780,P06760,P08649,P10758,P23739,Q4G075,Q6IMF3,Q6P6Q2,Q812E4                                                                                                |
| 4978 | 1,4,5,7,8,2<br>0,21,24 | 2,3,6,17,1<br>8,19,22,23 | 20 | P02780,P02781,P02782,P06760,P08649,P08723,P09456,P22273,P22282,P30120,P55159,Q4FZU<br>2,Q4G075,Q5M8C6,Q6AYR9,Q6IMF3,Q6P6Q2,Q811M5,Q812E4,Q9JHB9               |
| 4979 | 1,4,5,7,8,2<br>0,22,23 | 2,3,6,17,1<br>8,19,21,24 | 6  | P10758,P19218,P23739,Q03191,Q4G075,Q9WVK7                                                                                                                     |
| 4980 | 1,4,5,7,8,2<br>0,22,24 | 2,3,6,17,1<br>8,19,21,23 | 3  | P02780,Q4G075,Q6P6Q2                                                                                                                                          |
| 4981 | 1,4,5,7,8,2<br>0,23,24 | 2,3,6,17,1<br>8,19,21,22 | 8  | P10758,P23739,Q4G075,Q6IMF3,Q6P6Q2,Q812E4,Q9QYP1,Q9WVK7                                                                                                       |

|      |                                              |                                                           |
|------|----------------------------------------------|-----------------------------------------------------------|
| 4982 | 1,4,5,7,8,2 2,3,6,17,1<br>1,22,23 8,19,20,24 | 1 P49134                                                  |
| 4983 | 1,4,5,7,8,2 2,3,6,17,1<br>1,22,24 8,19,20,23 | 4 P49134,Q4FZU2,Q6IMF3,Q6P6Q2                             |
| 4984 | 1,4,5,7,8,2 2,3,6,17,1<br>1,23,24 8,19,20,22 | 8 O89117,P08649,P36860,P49134,Q4FZU2,Q63474,Q6IMF3,Q6P6Q2 |
| 4985 | 1,4,5,7,8,2 2,3,6,17,1<br>2,23,24 8,19,20,21 | 5 P25809,P49134,P63029,Q6P6R2,Q9WVK7                      |
| 4986 | 1,4,5,7,17, 2,3,6,8,21,<br>18,19,20 22,23,24 | 4 P20646,P30919,P36374,P97840                             |
| 4987 | 1,4,5,7,17, 2,3,6,8,20,<br>18,19,21 22,23,24 | 3 P20646,P97840,Q99MH3                                    |
| 4988 | 1,4,5,7,17, 2,3,6,8,20,<br>18,19,22 21,23,24 | 0                                                         |
| 4989 | 1,4,5,7,17, 2,3,6,8,20,<br>18,19,23 21,22,24 | 0                                                         |
| 4990 | 1,4,5,7,17, 2,3,6,8,20,<br>18,19,24 21,22,23 | 2 P09656,Q99MH3                                           |
| 4991 | 1,4,5,7,17, 2,3,6,8,19,<br>18,20,21 22,23,24 | 5 P00507,P19223,P97840,Q811M5,Q9Z0J6                      |
| 4992 | 1,4,5,7,17, 2,3,6,8,19,<br>18,20,22 21,23,24 | 3 P97840,Q03191,Q9Z0J6                                    |
| 4993 | 1,4,5,7,17, 2,3,6,8,19,<br>18,20,23 21,22,24 | 3 P23739,P30919,Q03191                                    |
| 4994 | 1,4,5,7,17, 2,3,6,8,19,<br>18,20,24 21,22,23 | 1 Q9Z0J6                                                  |
| 4995 | 1,4,5,7,17, 2,3,6,8,19,<br>18,21,22 20,23,24 | 0                                                         |
| 4996 | 1,4,5,7,17, 2,3,6,8,19,<br>18,21,23 20,22,24 | 0                                                         |
| 4997 | 1,4,5,7,17, 2,3,6,8,19,<br>18,21,24 20,22,23 | 3 P36376,P36860,Q99MH3                                    |
| 4998 | 1,4,5,7,17, 2,3,6,8,19,<br>18,22,23 20,21,24 | 1 Q68G31                                                  |
| 4999 | 1,4,5,7,17, 2,3,6,8,19,<br>18,22,24 20,21,23 | 0                                                         |
| 5000 | 1,4,5,7,17, 2,3,6,8,19,<br>18,23,24 20,21,22 | 0                                                         |
| 5001 | 1,4,5,7,17, 2,3,6,8,18,<br>19,20,21 22,23,24 | 7 P06760,P20646,P36374,P55159,P97840,Q5I0D1,Q99MH3        |



|      |                                              |                                             |
|------|----------------------------------------------|---------------------------------------------|
| 5002 | 1,4,5,7,17, 2,3,6,8,18,<br>19,20,22 21,23,24 | 3 P20646,P36374,Q9Z0J6                      |
| 5003 | 1,4,5,7,17, 2,3,6,8,18,<br>19,20,23 21,22,24 | 3 P02625,P10758,P23739                      |
| 5004 | 1,4,5,7,17, 2,3,6,8,18,<br>19,20,24 21,22,23 | 3 P36374,P54921,Q99MH3                      |
| 5005 | 1,4,5,7,17, 2,3,6,8,18,<br>19,21,22 20,23,24 | 2 Q99MH3,Q9R168                             |
| 5006 | 1,4,5,7,17, 2,3,6,8,18,<br>19,21,23 20,22,24 | 0                                           |
| 5007 | 1,4,5,7,17, 2,3,6,8,18,<br>19,21,24 20,22,23 | 4 P54921,Q62761;Q62762;Q62763,Q99MH3,Q9R168 |
| 5008 | 1,4,5,7,17, 2,3,6,8,18,<br>19,22,23 20,21,24 | 1 Q9R168                                    |
| 5009 | 1,4,5,7,17, 2,3,6,8,18,<br>19,22,24 20,21,23 | 2 Q99MH3,Q9R168                             |
| 5010 | 1,4,5,7,17, 2,3,6,8,18,<br>19,23,24 20,21,22 | 1 P25809                                    |
| 5011 | 1,4,5,7,17, 2,3,6,8,18,<br>20,21,22 19,23,24 | 1 Q9Z0J6                                    |
| 5012 | 1,4,5,7,17, 2,3,6,8,18,<br>20,21,23 19,22,24 | 1 P23739                                    |
| 5013 | 1,4,5,7,17, 2,3,6,8,18,<br>20,21,24 19,22,23 | 3 Q811M5,Q99MH3,Q9Z0J6                      |
| 5014 | 1,4,5,7,17, 2,3,6,8,18,<br>20,22,23 19,21,24 | 3 P23739,Q03191,Q68G31                      |
| 5015 | 1,4,5,7,17, 2,3,6,8,18,<br>20,22,24 19,21,23 | 1 Q9Z0J6                                    |
| 5016 | 1,4,5,7,17, 2,3,6,8,18,<br>20,23,24 19,21,22 | 2 P23739,Q9QYP1                             |
| 5017 | 1,4,5,7,17, 2,3,6,8,18,<br>21,22,23 19,20,24 | 2 Q68G31,Q9R168                             |
| 5018 | 1,4,5,7,17, 2,3,6,8,18,<br>21,22,24 19,20,23 | 3 P36860,Q99MH3,Q9R168                      |
| 5019 | 1,4,5,7,17, 2,3,6,8,18,<br>21,23,24 19,20,22 | 3 P36860,Q63474,Q9R168                      |
| 5020 | 1,4,5,7,17, 2,3,6,8,18,<br>22,23,24 19,20,21 | 4 P25809,Q00715,Q68G31,Q9R168               |
| 5021 | 1,4,5,7,18, 2,3,6,8,17,<br>19,20,21 22,23,24 | 5 P36374,P47967,P97840,Q5I0D1,Q99MH3        |

|      |                                              |                                             |
|------|----------------------------------------------|---------------------------------------------|
| 5022 | 1,4,5,7,18, 2,3,6,8,17,<br>19,20,22 21,23,24 | 1 P97840                                    |
| 5023 | 1,4,5,7,18, 2,3,6,8,17,<br>19,20,23 21,22,24 | 3 P10758,P23739,P97840                      |
| 5024 | 1,4,5,7,18, 2,3,6,8,17,<br>19,20,24 21,22,23 | 3 P36374,P97840,Q99MH3                      |
| 5025 | 1,4,5,7,18, 2,3,6,8,17,<br>19,21,22 20,23,24 | 3 P36376,P63029,P97840                      |
| 5026 | 1,4,5,7,18, 2,3,6,8,17,<br>19,21,23 20,22,24 | 3 O89117,P63029,P97840                      |
| 5027 | 1,4,5,7,18, 2,3,6,8,17,<br>19,21,24 20,22,23 | 5 O89117,P36376,P63029,P97840,Q99MH3        |
| 5028 | 1,4,5,7,18, 2,3,6,8,17,<br>19,22,23 20,21,24 | 1 P63029                                    |
| 5029 | 1,4,5,7,18, 2,3,6,8,17,<br>19,22,24 20,21,23 | 3 P17559,P36376,P63029                      |
| 5030 | 1,4,5,7,18, 2,3,6,8,17,<br>19,23,24 20,21,22 | 2 P25809,P63029                             |
| 5031 | 1,4,5,7,18, 2,3,6,8,17,<br>20,21,22 19,23,24 | 3 P97840,Q03191,Q9Z0J6                      |
| 5032 | 1,4,5,7,18, 2,3,6,8,17,<br>20,21,23 19,22,24 | 3 O89117,P97840,Q03191                      |
| 5033 | 1,4,5,7,18, 2,3,6,8,17,<br>20,21,24 19,22,23 | 3 O89117,P97840,Q99MH3                      |
| 5034 | 1,4,5,7,18, 2,3,6,8,17,<br>20,22,23 19,21,24 | 3 P97840,Q03191,Q9WVK7                      |
| 5035 | 1,4,5,7,18, 2,3,6,8,17,<br>20,22,24 19,21,23 | 4 P97840,Q03191,Q9WVK7,Q9Z0J6               |
| 5036 | 1,4,5,7,18, 2,3,6,8,17,<br>20,23,24 19,21,22 | 5 P10758,P23739,Q03191,Q9QYP1,Q9WVK7        |
| 5037 | 1,4,5,7,18, 2,3,6,8,17,<br>21,22,23 19,20,24 | 3 O89117,Q03191,Q68G31                      |
| 5038 | 1,4,5,7,18, 2,3,6,8,17,<br>21,22,24 19,20,23 | 3 O89117,P36376,P63029                      |
| 5039 | 1,4,5,7,18, 2,3,6,8,17,<br>21,23,24 19,20,22 | 2 O89117,P63029                             |
| 5040 | 1,4,5,7,18, 2,3,6,8,17,<br>22,23,24 19,20,21 | 6 D4A5U3,P13676,P25809,P63029,Q6P6R2,Q9WVK7 |
| 5041 | 1,4,5,7,19, 2,3,6,8,17,<br>20,21,22 18,23,24 | 4 P08649,P47967,P97840,Q5I0D1               |

|      |                                              |                                                    |
|------|----------------------------------------------|----------------------------------------------------|
| 5042 | 1,4,5,7,19, 2,3,6,8,17,<br>20,21,23 18,22,24 | 5 P08649,P10758,P23739,P97840,Q5I0D1               |
| 5043 | 1,4,5,7,19, 2,3,6,8,17,<br>20,21,24 18,22,23 | 7 O35547,P08649,P36374,P55159,P97840,Q5I0D1,Q99MH3 |
| 5044 | 1,4,5,7,19, 2,3,6,8,17,<br>20,22,23 18,21,24 | 3 P02625,P10758,P23739                             |
| 5045 | 1,4,5,7,19, 2,3,6,8,17,<br>20,22,24 18,21,23 | 0                                                  |
| 5046 | 1,4,5,7,19, 2,3,6,8,17,<br>20,23,24 18,21,22 | 4 P08649,P10758,P23739,Q9QYP1                      |
| 5047 | 1,4,5,7,19, 2,3,6,8,17,<br>21,22,23 18,20,24 | 1 P08649                                           |
| 5048 | 1,4,5,7,19, 2,3,6,8,17,<br>21,22,24 18,20,23 | 7 P08649,P17559,P36376,P55091,P63029,Q99MH3,Q9R168 |
| 5049 | 1,4,5,7,19, 2,3,6,8,17,<br>21,23,24 18,20,22 | 4 P08649,P25809,P63029,Q62761;Q62762;Q62763        |
| 5050 | 1,4,5,7,19, 2,3,6,8,17,<br>22,23,24 18,20,21 | 5 P25809,P26772,P55091,P63029,Q00715               |
| 5051 | 1,4,5,7,20, 2,3,6,8,17,<br>21,22,23 18,19,24 | 3 P08649,P97840,Q03191                             |
| 5052 | 1,4,5,7,20, 2,3,6,8,17,<br>21,22,24 18,19,23 | 1 P08649                                           |
| 5053 | 1,4,5,7,20, 2,3,6,8,17,<br>21,23,24 18,19,22 | 3 P08649,P23739,Q9QYP1                             |
| 5054 | 1,4,5,7,20, 2,3,6,8,17,<br>22,23,24 18,19,21 | 5 P08649,P23739,Q03191,Q9QYP1,Q9WVK7               |
| 5055 | 1,4,5,7,21, 2,3,6,8,17,<br>22,23,24 18,19,20 | 3 P08649,P25809,Q9R168                             |
| 5056 | 1,4,5,8,17, 2,3,6,7,21,<br>18,19,20 22,23,24 | 5 B0LT89,P01835,P13432,P36374,Q62714               |
| 5057 | 1,4,5,8,17, 2,3,6,7,20,<br>18,19,21 22,23,24 | 3 P06760,P22006,Q9QX74                             |
| 5058 | 1,4,5,8,17, 2,3,6,7,20,<br>18,19,22 21,23,24 | 1 P01835                                           |
| 5059 | 1,4,5,8,17, 2,3,6,7,20,<br>18,19,23 21,22,24 | 1 P01835                                           |
| 5060 | 1,4,5,8,17, 2,3,6,7,20,<br>18,19,24 21,22,23 | 3 O54728,P01835,P09656                             |
| 5061 | 1,4,5,8,17, 2,3,6,7,19,<br>18,20,21 22,23,24 | 5 P06760,P13432,Q10758,Q6P6Q2,Q811M5               |

|      |                                              |                                                           |
|------|----------------------------------------------|-----------------------------------------------------------|
| 5062 | 1,4,5,8,17, 2,3,6,7,19,<br>18,20,22 21,23,24 | 2 P13432,Q9Z0J6                                           |
| 5063 | 1,4,5,8,17, 2,3,6,7,19,<br>18,20,23 21,22,24 | 1 P23739                                                  |
| 5064 | 1,4,5,8,17, 2,3,6,7,19,<br>18,20,24 21,22,23 | 2 P13432,Q6P6Q2                                           |
| 5065 | 1,4,5,8,17, 2,3,6,7,19,<br>18,21,22 20,23,24 | 0                                                         |
| 5066 | 1,4,5,8,17, 2,3,6,7,19,<br>18,21,23 20,22,24 | 0                                                         |
| 5067 | 1,4,5,8,17, 2,3,6,7,19,<br>18,21,24 20,22,23 | 2 Q4FZU2,Q6P6Q2                                           |
| 5068 | 1,4,5,8,17, 2,3,6,7,19,<br>18,22,23 20,21,24 | 0                                                         |
| 5069 | 1,4,5,8,17, 2,3,6,7,19,<br>18,22,24 20,21,23 | 0                                                         |
| 5070 | 1,4,5,8,17, 2,3,6,7,19,<br>18,23,24 20,21,22 | 0                                                         |
| 5071 | 1,4,5,8,17, 2,3,6,7,18,<br>19,20,21 22,23,24 | 8 B0LT89,P04905,P06760,P20766,P36374,Q6IMF3,Q6P6Q2,Q6P6R2 |
| 5072 | 1,4,5,8,17, 2,3,6,7,18,<br>19,20,22 21,23,24 | 3 P01835,P20766,P36374                                    |
| 5073 | 1,4,5,8,17, 2,3,6,7,18,<br>19,20,23 21,22,24 | 4 P01835,P10758,P23739,P36374                             |
| 5074 | 1,4,5,8,17, 2,3,6,7,18,<br>19,20,24 21,22,23 | 7 O54728,P01835,P36374,P60905,Q6IMF3,Q6P6Q2,Q99MH3        |
| 5075 | 1,4,5,8,17, 2,3,6,7,18,<br>19,21,22 20,23,24 | 1 P20766                                                  |
| 5076 | 1,4,5,8,17, 2,3,6,7,18,<br>19,21,23 20,22,24 | 2 P20766,P22006                                           |
| 5077 | 1,4,5,8,17, 2,3,6,7,18,<br>19,21,24 20,22,23 | 7 O54728,Q4FZU2,Q62894,Q63474,Q6IMF3,Q6P6Q2,Q99MH3        |
| 5078 | 1,4,5,8,17, 2,3,6,7,18,<br>19,22,23 20,21,24 | 3 P00507,P01835,P20766                                    |
| 5079 | 1,4,5,8,17, 2,3,6,7,18,<br>19,22,24 20,21,23 | 3 O54728,P00507,P01835                                    |
| 5080 | 1,4,5,8,17, 2,3,6,7,18,<br>19,23,24 20,21,22 | 2 O54728,P01835                                           |
| 5081 | 1,4,5,8,17, 2,3,6,7,18,<br>20,21,22 19,23,24 | 2 P20766,Q6P6Q2                                           |

|      |                                              |                                                    |
|------|----------------------------------------------|----------------------------------------------------|
| 5082 | 1,4,5,8,17, 2,3,6,7,18,<br>20,21,23 19,22,24 | 4 P20766,P23739,Q6IMF3,Q6P6Q2                      |
| 5083 | 1,4,5,8,17, 2,3,6,7,18,<br>20,21,24 19,22,23 | 7 P02782,P20766,P30120,Q4FZU2,Q6IMF3,Q6P6Q2,Q811M5 |
| 5084 | 1,4,5,8,17, 2,3,6,7,18,<br>20,22,23 19,21,24 | 2 P20766,P23739                                    |
| 5085 | 1,4,5,8,17, 2,3,6,7,18,<br>20,22,24 19,21,23 | 2 P20766,Q6P6Q2                                    |
| 5086 | 1,4,5,8,17, 2,3,6,7,18,<br>20,23,24 19,21,22 | 5 P20766,P23739,Q4FZU2,Q6IMF3,Q6P6Q2               |
| 5087 | 1,4,5,8,17, 2,3,6,7,18,<br>21,22,23 19,20,24 | 1 P20766                                           |
| 5088 | 1,4,5,8,17, 2,3,6,7,18,<br>21,22,24 19,20,23 | 3 P20766,Q4FZU2,Q6P6Q2                             |
| 5089 | 1,4,5,8,17, 2,3,6,7,18,<br>21,23,24 19,20,22 | 5 P20766,Q4FZU2,Q63474,Q6IMF3,Q6P6Q2               |
| 5090 | 1,4,5,8,17, 2,3,6,7,18,<br>22,23,24 19,20,21 | 4 P00507,P20766,P47967,Q00715                      |
| 5091 | 1,4,5,8,18, 2,3,6,7,17,<br>19,20,21 22,23,24 | 6 B0LT89,O08815,P04905,P06760,P36374,Q5I0D1        |
| 5092 | 1,4,5,8,18, 2,3,6,7,17,<br>19,20,22 21,23,24 | 1 Q6AY61                                           |
| 5093 | 1,4,5,8,18, 2,3,6,7,17,<br>19,20,23 21,22,24 | 4 P01039,P10758,P23739,Q9R168                      |
| 5094 | 1,4,5,8,18, 2,3,6,7,17,<br>19,20,24 21,22,23 | 4 O54728,P36374,P60905,Q9R168                      |
| 5095 | 1,4,5,8,18, 2,3,6,7,17,<br>19,21,22 20,23,24 | 0                                                  |
| 5096 | 1,4,5,8,18, 2,3,6,7,17,<br>19,21,23 20,22,24 | 0                                                  |
| 5097 | 1,4,5,8,18, 2,3,6,7,17,<br>19,21,24 20,22,23 | 3 O54728,P63029,Q99MH3                             |
| 5098 | 1,4,5,8,18, 2,3,6,7,17,<br>19,22,23 20,21,24 | 3 P00507,P63029,Q6AY61                             |
| 5099 | 1,4,5,8,18, 2,3,6,7,17,<br>19,22,24 20,21,23 | 3 O54728,P00507,P63029                             |
| 5100 | 1,4,5,8,18, 2,3,6,7,17,<br>19,23,24 20,21,22 | 2 O54728,P63029                                    |
| 5101 | 1,4,5,8,18, 2,3,6,7,17,<br>20,21,22 19,23,24 | 1 P54921                                           |

|      |                                              |                                                                                        |
|------|----------------------------------------------|----------------------------------------------------------------------------------------|
| 5102 | 1,4,5,8,18, 2,3,6,7,17,<br>20,21,23 19,22,24 | 2 P23739,P54921                                                                        |
| 5103 | 1,4,5,8,18, 2,3,6,7,17,<br>20,21,24 19,22,23 | 1 Q6P6Q2                                                                               |
| 5104 | 1,4,5,8,18, 2,3,6,7,17,<br>20,22,23 19,21,24 | 6 P01039,P23739,P54921,Q5QE79,Q6AY61,Q9WVK7                                            |
| 5105 | 1,4,5,8,18, 2,3,6,7,17,<br>20,22,24 19,21,23 | 0                                                                                      |
| 5106 | 1,4,5,8,18, 2,3,6,7,17,<br>20,23,24 19,21,22 | 4 P23739,Q5QE79,Q9R168,Q9WVK7                                                          |
| 5107 | 1,4,5,8,18, 2,3,6,7,17,<br>21,22,23 19,20,24 | 2 P54921,Q6AY61                                                                        |
| 5108 | 1,4,5,8,18, 2,3,6,7,17,<br>21,22,24 19,20,23 | 0                                                                                      |
| 5109 | 1,4,5,8,18, 2,3,6,7,17,<br>21,23,24 19,20,22 | 1 O89117                                                                               |
| 5110 | 1,4,5,8,18, 2,3,6,7,17,<br>22,23,24 19,20,21 | 4 P00507,P49134,P63029,Q9WVK7                                                          |
| 5111 | 1,4,5,8,19, 2,3,6,7,17,<br>20,21,22 18,23,24 | 3 P19218,P20766,P36374                                                                 |
| 5112 | 1,4,5,8,19, 2,3,6,7,17,<br>20,21,23 18,22,24 | 5 P10758,P20766,P23739,P36374,Q6P6Q2                                                   |
| 5113 | 1,4,5,8,19, 2,3,6,7,17,<br>20,21,24 18,22,23 | 12 O35547,O54728,P02782,P04905,P20766,P30120,P36374,P60905,Q6IMF3,Q6P6Q2,Q812E4,Q99MH3 |
| 5114 | 1,4,5,8,19, 2,3,6,7,17,<br>20,22,23 18,21,24 | 6 P01039,P10758,P19218,P20766,P23739,Q6AY61                                            |
| 5115 | 1,4,5,8,19, 2,3,6,7,17,<br>20,22,24 18,21,23 | 3 O54728,P20766,P36374                                                                 |
| 5116 | 1,4,5,8,19, 2,3,6,7,17,<br>20,23,24 18,21,22 | 4 O54728,P10758,P23739,Q6P6Q2                                                          |
| 5117 | 1,4,5,8,19, 2,3,6,7,17,<br>21,22,23 18,20,24 | 1 P20766                                                                               |
| 5118 | 1,4,5,8,19, 2,3,6,7,17,<br>21,22,24 18,20,23 | 4 O54728,P20766,P30919,P55091                                                          |
| 5119 | 1,4,5,8,19, 2,3,6,7,17,<br>21,23,24 18,20,22 | 2 O54728,Q63474                                                                        |
| 5120 | 1,4,5,8,19, 2,3,6,7,17,<br>22,23,24 18,20,21 | 6 O54728,P00507,P25809,P55091,P63029,Q00715                                            |
| 5121 | 1,4,5,8,20, 2,3,6,7,17,<br>21,22,23 18,19,24 | 3 P20766,P23739,P54921                                                                 |

|      |                                              |                                             |
|------|----------------------------------------------|---------------------------------------------|
| 5122 | 1,4,5,8,20, 2,3,6,7,17,<br>21,22,24 18,19,23 | 2 P20766,Q6P6Q2                             |
| 5123 | 1,4,5,8,20, 2,3,6,7,17,<br>21,23,24 18,19,22 | 4 P20766,P23739,Q6IMF3,Q6P6Q2               |
| 5124 | 1,4,5,8,20, 2,3,6,7,17,<br>22,23,24 18,19,21 | 4 P20766,P23739,Q5QE79,Q9WVK7               |
| 5125 | 1,4,5,8,21, 2,3,6,7,17,<br>22,23,24 18,19,20 | 2 P20766,P30919                             |
| 5126 | 1,4,5,17,1 2,3,6,7,8,2<br>8,19,20,21 2,23,24 | 6 BOLT89,P35280,P36374,Q62714,Q6P6R2,Q99MH3 |
| 5127 | 1,4,5,17,1 2,3,6,7,8,2<br>8,19,20,22 1,23,24 | 1 Q62714                                    |
| 5128 | 1,4,5,17,1 2,3,6,7,8,2<br>8,19,20,23 1,22,24 | 4 P10758,P23739,P35280,Q62714               |
| 5129 | 1,4,5,17,1 2,3,6,7,8,2<br>8,19,20,24 1,22,23 | 4 P35280,Q62714,Q63532,Q99MH3               |
| 5130 | 1,4,5,17,1 2,3,6,7,8,2<br>8,19,21,22 0,23,24 | 1 Q62894                                    |
| 5131 | 1,4,5,17,1 2,3,6,7,8,2<br>8,19,21,23 0,22,24 | 1 P35280                                    |
| 5132 | 1,4,5,17,1 2,3,6,7,8,2<br>8,19,21,24 0,22,23 | 3 P35280,Q62894,Q99MH3                      |
| 5133 | 1,4,5,17,1 2,3,6,7,8,2<br>8,19,22,23 0,21,24 | 2 P02631,Q00715                             |
| 5134 | 1,4,5,17,1 2,3,6,7,8,2<br>8,19,22,24 0,21,23 | 1 P02631                                    |
| 5135 | 1,4,5,17,1 2,3,6,7,8,2<br>8,19,23,24 0,21,22 | 2 P02631,P35280                             |
| 5136 | 1,4,5,17,1 2,3,6,7,8,1<br>8,20,21,22 9,23,24 | 2 P20766,Q9Z0J6                             |
| 5137 | 1,4,5,17,1 2,3,6,7,8,1<br>8,20,21,23 9,22,24 | 1 P35280                                    |
| 5138 | 1,4,5,17,1 2,3,6,7,8,1<br>8,20,21,24 9,22,23 | 2 P35280,Q99MH3                             |
| 5139 | 1,4,5,17,1 2,3,6,7,8,1<br>8,20,22,23 9,21,24 | 0                                           |
| 5140 | 1,4,5,17,1 2,3,6,7,8,1<br>8,20,22,24 9,21,23 | 2 P50115,Q9Z0J6                             |
| 5141 | 1,4,5,17,1 2,3,6,7,8,1<br>8,20,23,24 9,21,22 | 4 P11883,P23739,P35280,Q9QYP1               |

|      |                                              |                                                    |
|------|----------------------------------------------|----------------------------------------------------|
| 5142 | 1,4,5,17,1 2,3,6,7,8,1<br>8,21,22,23 9,20,24 | 0                                                  |
| 5143 | 1,4,5,17,1 2,3,6,7,8,1<br>8,21,22,24 9,20,23 | 0                                                  |
| 5144 | 1,4,5,17,1 2,3,6,7,8,1<br>8,21,23,24 9,20,22 | 1 P35280                                           |
| 5145 | 1,4,5,17,1 2,3,6,7,8,1<br>8,22,23,24 9,20,21 | 7 D4A5U3,P02631,P62804,Q00715,Q5RKI1,Q63617,Q9WTT6 |
| 5146 | 1,4,5,17,1 2,3,6,7,8,1<br>9,20,21,22 8,23,24 | 3 BOLT89,P20766,Q3ZAV1                             |
| 5147 | 1,4,5,17,1 2,3,6,7,8,1<br>9,20,21,23 8,22,24 | 3 P20766,P23739,P35280                             |
| 5148 | 1,4,5,17,1 2,3,6,7,8,1<br>9,20,21,24 8,22,23 | 6 BOLT89,P20766,P35280,P36374,P80202,Q99MH3        |
| 5149 | 1,4,5,17,1 2,3,6,7,8,1<br>9,20,22,23 8,21,24 | 4 P02625,P20766,P23739,Q00715                      |
| 5150 | 1,4,5,17,1 2,3,6,7,8,1<br>9,20,22,24 8,21,23 | 2 P20766,Q00715                                    |
| 5151 | 1,4,5,17,1 2,3,6,7,8,1<br>9,20,23,24 8,21,22 | 6 P02625,P10758,P20766,P23739,P35280,Q00715        |
| 5152 | 1,4,5,17,1 2,3,6,7,8,1<br>9,21,22,23 8,20,24 | 2 P12020,P20766                                    |
| 5153 | 1,4,5,17,1 2,3,6,7,8,1<br>9,21,22,24 8,20,23 | 4 P20766,Q62894,Q99MH3,Q9R168                      |
| 5154 | 1,4,5,17,1 2,3,6,7,8,1<br>9,21,23,24 8,20,22 | 3 P12020,P20766,P35280                             |
| 5155 | 1,4,5,17,1 2,3,6,7,8,1<br>9,22,23,24 8,20,21 | 6 P00507,P02631,P20766,P25809,P62804,Q00715        |
| 5156 | 1,4,5,17,2 2,3,6,7,8,1<br>0,21,22,23 8,19,24 | 2 P20766,P23739                                    |
| 5157 | 1,4,5,17,2 2,3,6,7,8,1<br>0,21,22,24 8,19,23 | 1 P20766                                           |
| 5158 | 1,4,5,17,2 2,3,6,7,8,1<br>0,21,23,24 8,19,22 | 4 P20766,P23739,P35280,Q9QYP1                      |
| 5159 | 1,4,5,17,2 2,3,6,7,8,1<br>0,22,23,24 8,19,21 | 5 P02631,P20766,P23739,P62804,Q00715               |
| 5160 | 1,4,5,17,2 2,3,6,7,8,1<br>1,22,23,24 8,19,20 | 4 P12020,P20766,P50280,Q9R168                      |
| 5161 | 1,4,5,18,1 2,3,6,7,8,1<br>9,20,21,22 7,23,24 | 3 P97840,Q5PQL7,Q63598                             |



|      |                                              |                                                                  |
|------|----------------------------------------------|------------------------------------------------------------------|
| 5162 | 1,4,5,18,1 2,3,6,7,8,1<br>9,20,21,23 7,22,24 | 2 P10758,P35280                                                  |
| 5163 | 1,4,5,18,1 2,3,6,7,8,1<br>9,20,21,24 7,22,23 | 2 P35280,Q99MH3                                                  |
| 5164 | 1,4,5,18,1 2,3,6,7,8,1<br>9,20,22,23 7,21,24 | 4 P01039,P04762,P10758,Q6AY61                                    |
| 5165 | 1,4,5,18,1 2,3,6,7,8,1<br>9,20,22,24 7,21,23 | 2 O70594,P50115                                                  |
| 5166 | 1,4,5,18,1 2,3,6,7,8,1<br>9,20,23,24 7,21,22 | 3 P10758,P23739,P35280                                           |
| 5167 | 1,4,5,18,1 2,3,6,7,8,1<br>9,21,22,23 7,20,24 | 1 P13676                                                         |
| 5168 | 1,4,5,18,1 2,3,6,7,8,1<br>9,21,22,24 7,20,23 | 5 P13676,P17559,P36376,P63029,Q62894                             |
| 5169 | 1,4,5,18,1 2,3,6,7,8,1<br>9,21,23,24 7,20,22 | 5 O70417,O89117,P12020,P35280,P63029                             |
| 5170 | 1,4,5,18,1 2,3,6,7,8,1<br>9,22,23,24 7,20,21 | 9 D4A5U3,P00507,P02631,P13676,P25809,P62804,P63029,Q00715,Q9WTT6 |
| 5171 | 1,4,5,18,2 2,3,6,7,8,1<br>0,21,22,23 7,19,24 | 3 P20766,P50115,P54921                                           |
| 5172 | 1,4,5,18,2 2,3,6,7,8,1<br>0,21,22,24 7,19,23 | 1 P50115                                                         |
| 5173 | 1,4,5,18,2 2,3,6,7,8,1<br>0,21,23,24 7,19,22 | 5 O89117,P23739,P35280,P50115,Q9QYP1                             |
| 5174 | 1,4,5,18,2 2,3,6,7,8,1<br>0,22,23,24 7,19,21 | 9 P02631,P04355,P23739,P50115,P62804,Q00715,Q5QE79,Q9QX74,Q9WVK7 |
| 5175 | 1,4,5,18,2 2,3,6,7,8,1<br>1,22,23,24 7,19,20 | 7 D4A5U3,O70417,O89117,P13676,P50115,Q5U2V4,Q9WTT6               |
| 5176 | 1,4,5,19,2 2,3,6,7,8,1<br>0,21,22,23 7,18,24 | 3 P20766,P23739,Q63598                                           |
| 5177 | 1,4,5,19,2 2,3,6,7,8,1<br>0,21,22,24 7,18,23 | 4 O70594,P20766,Q63598,Q99MH3                                    |
| 5178 | 1,4,5,19,2 2,3,6,7,8,1<br>0,21,23,24 7,18,22 | 5 P08649,P10758,P20766,P23739,P35280                             |
| 5179 | 1,4,5,19,2 2,3,6,7,8,1<br>0,22,23,24 7,18,21 | 7 P02631,P10758,P20766,P23739,P26772,P62804,Q00715               |
| 5180 | 1,4,5,19,2 2,3,6,7,8,1<br>1,22,23,24 7,18,20 | 8 D4A5U3,O70417,P06911,P12020,P13676,P20766,P25809,P55091        |
| 5181 | 1,4,5,20,2 2,3,6,7,8,1<br>1,22,23,24 7,18,19 | 4 P08649,P20766,P23739,P50115                                    |

|      |                        |                          |    |                                                                                                                                                                                                                                                                                                |
|------|------------------------|--------------------------|----|------------------------------------------------------------------------------------------------------------------------------------------------------------------------------------------------------------------------------------------------------------------------------------------------|
| 5182 | 1,4,6,7,8,1<br>7,18,19 | 2,3,5,20,2<br>1,22,23,24 | 10 | P06761,P07150,P11598,P13432,P18418,P20646,P21674,P22282,Q99041,Q9QX74                                                                                                                                                                                                                          |
| 5183 | 1,4,6,7,8,1<br>7,18,20 | 2,3,5,19,2<br>1,22,23,24 | 19 | P02780,P06761,P06911,P11598,P12020,P13432,P18418,P19629,P22273,P22282,P22283,P47727,P50280,Q4G075,Q5GRG2,Q9JHB9,Q9JI85,Q9QW07,Q9Z0J6                                                                                                                                                           |
| 5184 | 1,4,6,7,8,1<br>7,18,21 | 2,3,5,19,2<br>0,22,23,24 | 9  | P06761,P11598,P13432,P18418,P22282,P22283,Q63493,Q9QX74,Q9Z1F2                                                                                                                                                                                                                                 |
| 5185 | 1,4,6,7,8,1<br>7,18,22 | 2,3,5,19,2<br>0,21,23,24 | 3  | P13432,Q99041,Q9Z1F2                                                                                                                                                                                                                                                                           |
| 5186 | 1,4,6,7,8,1<br>7,18,23 | 2,3,5,19,2<br>0,21,22,24 | 3  | P13432,P18418,P21674                                                                                                                                                                                                                                                                           |
| 5187 | 1,4,6,7,8,1<br>7,18,24 | 2,3,5,19,2<br>0,21,22,23 | 4  | P13432,P18418,P49134,Q9Z1F2                                                                                                                                                                                                                                                                    |
| 5188 | 1,4,6,7,8,1<br>7,19,20 | 2,3,5,18,2<br>1,22,23,24 | 33 | D4A5U3,P02780,P04905,P06761,P06911,P08723,P0C0A9,P11598,P12020,P13432,P18418,P19629,P20646,P22273,P22282,P22283,P36374,P46462,P47727,P50280,Q4G075,Q5GRG2,Q5M8C6,Q63493,Q63617,Q6RUV5,Q812E4,Q99041,Q9JHB9,Q9JI85,Q9QW07,Q9R0T3,Q9WTT6                                                         |
| 5189 | 1,4,6,7,8,1<br>7,19,21 | 2,3,5,18,2<br>0,22,23,24 | 17 | P00714,P06761,P0C0A9,P11598,P18418,P20646,P21674,P22282,P22283,Q5QE79,Q63474,Q63493,Q63617,Q66H69,Q99041,Q9JI85,Q9QX74                                                                                                                                                                         |
| 5190 | 1,4,6,7,8,1<br>7,19,22 | 2,3,5,18,2<br>0,21,23,24 | 2  | P22282,Q99041                                                                                                                                                                                                                                                                                  |
| 5191 | 1,4,6,7,8,1<br>7,19,23 | 2,3,5,18,2<br>0,21,22,24 | 3  | P21674,P22282,Q99041                                                                                                                                                                                                                                                                           |
| 5192 | 1,4,6,7,8,1<br>7,19,24 | 2,3,5,18,2<br>0,21,22,23 | 5  | O54728,P08723,P18418,P22282,Q63474                                                                                                                                                                                                                                                             |
| 5193 | 1,4,6,7,8,1<br>7,20,21 | 2,3,5,18,1<br>9,22,23,24 | 41 | D4A5U3,P02631,P02780,P02781,P02782,P06761,P06911,P07647,P08723,P09456,P11598,P12020,P13432,P18418,P19223,P19629,P22273,P22282,P22283,P30120,P36374,P46462,P47727,Q4G075,Q5GRG2,Q5M8C6,Q62946,Q63474,Q63493,Q63617,Q6AYR9,Q78P75,Q812E4,Q8CJ52,Q99041,Q9JHB9,Q9JI85,Q9QW07,Q9QX74,Q9R0T3,Q9WTT6 |
| 5194 | 1,4,6,7,8,1<br>7,20,22 | 2,3,5,18,1<br>9,21,23,24 | 16 | O70417,P02780,P06761,P06911,P11598,P12020,P13432,P19629,P22273,P22282,Q4G075,Q5GRG2,Q99041,Q9JHB9,Q9QW07,Q9Z0J6                                                                                                                                                                                |
| 5195 | 1,4,6,7,8,1<br>7,20,23 | 2,3,5,18,1<br>9,21,22,24 | 11 | P02780,P06911,P10758,P11598,P12020,P19629,P22273,P22282,Q4G075,Q5GRG2,Q812E4                                                                                                                                                                                                                   |
| 5196 | 1,4,6,7,8,1<br>7,20,24 | 2,3,5,18,1<br>9,21,22,23 | 25 | P02780,P02781,P06761,P06911,P08723,P09456,P11598,P12020,P13432,P18418,P22273,P22282,P22283,P36374,P46462,P47727,Q4G075,Q5GRG2,Q5M8C6,Q63617,Q6AYR9,Q812E4,Q9JHB9,Q9JI85,Q9QW07                                                                                                                 |
| 5197 | 1,4,6,7,8,1<br>7,21,22 | 2,3,5,18,1<br>9,20,23,24 | 2  | Q99041,Q9Z1F2                                                                                                                                                                                                                                                                                  |
| 5198 | 1,4,6,7,8,1<br>7,21,23 | 2,3,5,18,1<br>9,20,22,24 | 3  | P21674,Q63474,Q63493                                                                                                                                                                                                                                                                           |
| 5199 | 1,4,6,7,8,1<br>7,21,24 | 2,3,5,18,1<br>9,20,22,23 | 9  | P02782,P18418,P22282,P22283,P36860,Q63474,Q6AYR9,Q9JHB9,Q9Z1F2                                                                                                                                                                                                                                 |

|      |                        |                          |                                                                                                                                                                                                                |
|------|------------------------|--------------------------|----------------------------------------------------------------------------------------------------------------------------------------------------------------------------------------------------------------|
| 5200 | 1,4,6,7,8,1<br>7,22,23 | 2,3,5,18,1<br>9,20,21,24 | 1 Q99041                                                                                                                                                                                                       |
| 5201 | 1,4,6,7,8,1<br>7,22,24 | 2,3,5,18,1<br>9,20,21,23 | 2 P23593,Q99041                                                                                                                                                                                                |
| 5202 | 1,4,6,7,8,1<br>7,23,24 | 2,3,5,18,1<br>9,20,21,22 | 2 Q63474,Q63598                                                                                                                                                                                                |
| 5203 | 1,4,6,7,8,1<br>8,19,20 | 2,3,5,17,2<br>1,22,23,24 | O08815,P02780,P06761,P06911,P08723,P0C0A9,P11598,P12020,P18418,P19629,P22273,P2228<br>28 2,P22283,P31044,P36374,P46462,P47727,P50280,Q4G075,Q5GRG2,Q63493,Q63617,Q812E4,Q<br>99041,Q9JHB9,Q9JI85,Q9QW07,Q9R0T3 |
| 5204 | 1,4,6,7,8,1<br>8,19,21 | 2,3,5,17,2<br>0,22,23,24 | P00714,P06761,P0C0A9,P11598,P18418,P22282,P22283,Q63493,Q63617,Q66H69,Q99041,Q9JI<br>12 85                                                                                                                     |
| 5205 | 1,4,6,7,8,1<br>8,19,22 | 2,3,5,17,2<br>0,21,23,24 | 4 P0C0A9,P22282,Q6AY61,Q99041                                                                                                                                                                                  |
| 5206 | 1,4,6,7,8,1<br>8,19,23 | 2,3,5,17,2<br>0,21,22,24 | 4 P0C0A9,P21674,P22282,Q99041                                                                                                                                                                                  |
| 5207 | 1,4,6,7,8,1<br>8,19,24 | 2,3,5,17,2<br>0,21,22,23 | 9 O54728,P06761,P08723,P0C0A9,P11598,P18418,P22282,Q99041,Q9QW07                                                                                                                                               |
| 5208 | 1,4,6,7,8,1<br>8,20,21 | 2,3,5,17,1<br>9,22,23,24 | P02631,P02780,P02781,P06761,P06911,P07647,P08723,P0C0A9,P11598,P12020,P18418,P1962<br>28 9,P22273,P22282,P22283,P46462,P50280,Q5GRG2,Q5M8C6,Q63493,Q63617,Q78P75,Q812E4,<br>Q99041,Q9JHB9,Q9JI85,Q9QW07,Q9R0T3 |
| 5209 | 1,4,6,7,8,1<br>8,20,22 | 2,3,5,17,1<br>9,21,23,24 | P02780,P06761,P06911,P11598,P12020,P19629,P22273,P22282,P50280,P54921,Q4G075,Q5GR<br>16 G2,Q6AY61,Q99041,Q9JHB9,Q9QW07                                                                                         |
| 5210 | 1,4,6,7,8,1<br>8,20,23 | 2,3,5,17,1<br>9,21,22,24 | P02780,P06761,P06911,P10758,P11598,P12020,P18418,P19629,P22273,P22282,P50280,P54921<br>17 ,Q4G075,Q5GRG2,Q812E4,Q99041,Q9QW07                                                                                  |
| 5211 | 1,4,6,7,8,1<br>8,20,24 | 2,3,5,17,1<br>9,21,22,23 | P02780,P06761,P06911,P08723,P0C0A9,P11598,P12020,P13432,P18418,P22273,P22282,P2228<br>20 3,P50280,Q5GRG2,Q5M8C6,Q63617,Q812E4,Q9JHB9,Q9JI85,Q9QW07                                                             |
| 5212 | 1,4,6,7,8,1<br>8,21,22 | 2,3,5,17,1<br>9,20,23,24 | 4 P11598,P54921,Q99041,Q9Z1F2                                                                                                                                                                                  |
| 5213 | 1,4,6,7,8,1<br>8,21,23 | 2,3,5,17,1<br>9,20,22,24 | 4 P11598,P19629,P54921,Q99041                                                                                                                                                                                  |
| 5214 | 1,4,6,7,8,1<br>8,21,24 | 2,3,5,17,1<br>9,20,22,23 | 11 P02782,P11598,P18418,P22282,P22283,P36860,P49134,Q63474,Q6AYR9,Q9JHB9,Q9Z1F2                                                                                                                                |
| 5215 | 1,4,6,7,8,1<br>8,22,23 | 2,3,5,17,1<br>9,20,21,24 | 6 P49134,P54921,Q63532,Q6AY61,Q99041,Q9WVK7                                                                                                                                                                    |
| 5216 | 1,4,6,7,8,1<br>8,22,24 | 2,3,5,17,1<br>9,20,21,23 | 5 P22006,P49134,Q99041,Q9WVK7,Q9Z1F2                                                                                                                                                                           |
| 5217 | 1,4,6,7,8,1<br>8,23,24 | 2,3,5,17,1<br>9,20,21,22 | 3 P49134,Q3ZAV1,Q9WVK7                                                                                                                                                                                         |

5218 1,4,6,7,8,1 2,3,5,17,1  
9,20,21 8,22,23,24

5219 1,4,6,7,8,1 2,3,5,17,1  
9,20,22 8,21,23,24

5220 1,4,6,7,8,1 2,3,5,17,1  
9,20,23 8,21,22,24

5221 1,4,6,7,8,1 2,3,5,17,1  
9,20,24 8,21,22,23

5222 1,4,6,7,8,1 2,3,5,17,1  
9,21,22 8,20,23,24

5223 1,4,6,7,8,1 2,3,5,17,1  
9,21,23 8,20,22,24

5224 1,4,6,7,8,1 2,3,5,17,1  
9,21,24 8,20,22,23

5225 1,4,6,7,8,1 2,3,5,17,1  
9,22,23 8,20,21,24

5226 1,4,6,7,8,1 2,3,5,17,1  
9,22,24 8,20,21,23

5227 1,4,6,7,8,1 2,3,5,17,1  
9,23,24 8,20,21,22

5228 1,4,6,7,8,2 2,3,5,17,1  
0,21,22 8,19,23,24

5229 1,4,6,7,8,2 2,3,5,17,1  
0,21,23 8,19,22,24

5230 1,4,6,7,8,2 2,3,5,17,1  
0,21,24 8,19,22,23

5231 1,4,6,7,8,2 2,3,5,17,1  
0,22,23 8,19,21,24

5232 1,4,6,7,8,2 2,3,5,17,1  
0,22,24 8,19,21,23

iRT-  
Kit\_WR\_fusion,O08815,O35547,P00714,P02631,P02780,P02781,P02782,P04905,P05369,P06761,  
46 P06911,P07647,P08723,P09456,P0C0A9,P11598,P12020,P18418,P19629,P22273,P22282,P2228  
3,P24368,P30120,P36374,P40241,P46462,P50280,Q4G075,Q5GRG2,Q5I0D1,Q5M8C6,Q63493,  
Q63617,Q6AYR9,Q6Q7Y5,Q812E4,Q8CJ52,Q99041,Q9JHB9,Q9JI85,Q9QW07,Q9QZK8,Q9R0T3,  
Q9WTT6  
P02780,P06761,P06911,P08723,P0C0A9,P11598,P12020,P15399,P19218,P19629,P22273,P2228  
26 2,P22283,P36374,P46462,P50280,Q4G075,Q5GRG2,Q63493,Q63617,Q812E4,Q99041,Q9JHB9,  
Q9JI85,Q9QW07,Q9QZK9  
P02780,P06761,P06911,P08723,P0C0A9,P10758,P11598,P12020,P19629,P22273,P22282,P2228  
23 3,P36374,P46462,P50280,Q4G075,Q5GRG2,Q63493,Q63617,Q812E4,Q99041,Q9JI85,Q9QW07  
O35547,O54728,P00714,P02780,P02781,P06761,P06911,P07647,P08723,P09456,P0C0A9,P1159  
8,P12020,P18418,P19629,P22273,P22282,P22283,P36374,P46462,P50280,P60905,Q4G075,Q5G  
35 RG2,Q5M8C6,Q63493,Q63617,Q6RUV5,Q812E4,Q8CJ52,Q99041,Q9JHB9,Q9JI85,Q9QW07,Q9  
R0T3  
10 P00714,P06761,P0C0A9,P11598,P22282,P22283,Q63493,Q63617,Q99041,Q9JI85  
13 P00714,P06761,P0C0A9,P11598,P19629,P21674,P22282,P22283,Q63474,Q63493,Q63617,Q990  
41,Q9JI85  
20 O54728,P00714,P02782,P06761,P07647,P08723,P0C0A9,P11598,P18418,P22282,P22283,Q6347  
4,Q63493,Q63617,Q6AYR9,Q6Q7Y5,Q8CJ52,Q99041,Q9JI85,Q9QW07  
3 P19218,Q6AY61,Q99041  
5 O54728,P0C0A9,P22006,P22282,Q99041  
6 O54728,P0C0A9,P22282,P25809,Q63474,Q99041  
P02780,P06761,P06911,P08723,P0C0A9,P11598,P12020,P19629,P22273,P22282,P22283,P4646  
24 2,Q4G075,Q5GRG2,Q5M8C6,Q63493,Q63617,Q6AYR9,Q78P75,Q812E4,Q99041,Q9JHB9,Q9JI8  
5,Q9QW07  
P02780,P06761,P06911,P0C0A9,P10758,P11598,P19629,P22273,P22282,P22283,Q4G075,Q5GR  
23 G2,Q5M8C6,Q63493,Q63617,Q6AYR9,Q78P75,Q812E4,Q8CJ52,Q99041,Q9JHB9,Q9JI85,Q9QW  
07  
O35547,O88917,P00714,P02780,P02781,P02782,P06761,P06911,P07647,P08723,P09456,P0C0A  
9,P11598,P12020,P18418,P19629,P22273,P22282,P22283,P30120,P36374,P46462,Q5GRG2,Q5  
36 M8C6,Q63474,Q63493,Q63617,Q6AYR9,Q78P75,Q812E4,Q8CJ52,Q99041,Q9JHB9,Q9JI85,Q9Q  
W07,Q9R0T3  
P02780,P06911,P10758,P11598,P12020,P19629,P22273,P54921,Q4G075,Q5GRG2,Q6AY61,Q99  
13 041,Q9QW07  
P02780,P06911,P08723,P11598,P12020,P19629,P22006,P22273,P22282,Q4G075,Q5GRG2,Q636  
16 17,Q812E4,Q99041,Q9JHB9,Q9QW07

|      |                         |                          |    |                                                                                                          |
|------|-------------------------|--------------------------|----|----------------------------------------------------------------------------------------------------------|
| 5233 | 1,4,6,7,8,2<br>0,23,24  | 2,3,5,17,1<br>8,19,21,22 | 15 | P02780,P06911,P08723,P10758,P11598,P12020,P19629,P22273,P22282,Q4G075,Q5GRG2,Q812E4,Q9JHB9,Q9QW07,Q9QYP1 |
| 5234 | 1,4,6,7,8,2<br>1,22,23  | 2,3,5,17,1<br>8,19,20,24 | 4  | P19629,P54921,Q63532,Q99041                                                                              |
| 5235 | 1,4,6,7,8,2<br>1,22,24  | 2,3,5,17,1<br>8,19,20,23 | 4  | P02782,Q63474,Q6AYR9,Q99041                                                                              |
| 5236 | 1,4,6,7,8,2<br>1,23,24  | 2,3,5,17,1<br>8,19,20,22 | 3  | P36860,Q63474,Q6AYR9                                                                                     |
| 5237 | 1,4,6,7,8,2<br>2,23,24  | 2,3,5,17,1<br>8,19,20,21 | 6  | O54858,P22006,P25809,P49134,Q99041,Q9WVK7                                                                |
| 5238 | 1,4,6,7,17,<br>18,19,20 | 2,3,5,8,21,<br>22,23,24  | 6  | P11598,P20646,P22283,P30919,P36374,Q63617                                                                |
| 5239 | 1,4,6,7,17,<br>18,19,21 | 2,3,5,8,20,<br>22,23,24  | 4  | P05539,P11598,P22283,P36376                                                                              |
| 5240 | 1,4,6,7,17,<br>18,19,22 | 2,3,5,8,20,<br>21,23,24  | 1  | P36376                                                                                                   |
| 5241 | 1,4,6,7,17,<br>18,19,23 | 2,3,5,8,20,<br>21,22,24  | 1  | P21674                                                                                                   |
| 5242 | 1,4,6,7,17,<br>18,19,24 | 2,3,5,8,20,<br>21,22,23  | 2  | P36376,P70549                                                                                            |
| 5243 | 1,4,6,7,17,<br>18,20,21 | 2,3,5,8,19,<br>22,23,24  | 8  | P00507,P05539,P07647,P11598,P19223,P22283,Q63617,Q9Z0J6                                                  |
| 5244 | 1,4,6,7,17,<br>18,20,22 | 2,3,5,8,19,<br>21,23,24  | 1  | Q9Z0J6                                                                                                   |
| 5245 | 1,4,6,7,17,<br>18,20,23 | 2,3,5,8,19,<br>21,22,24  | 3  | P11598,P30919,Q9QYP1                                                                                     |
| 5246 | 1,4,6,7,17,<br>18,20,24 | 2,3,5,8,19,<br>21,22,23  | 3  | P11598,Q9QYP1,Q9Z0J6                                                                                     |
| 5247 | 1,4,6,7,17,<br>18,21,22 | 2,3,5,8,19,<br>20,23,24  | 3  | P05539,P23739,P36376                                                                                     |
| 5248 | 1,4,6,7,17,<br>18,21,23 | 2,3,5,8,19,<br>20,22,24  | 0  |                                                                                                          |
| 5249 | 1,4,6,7,17,<br>18,21,24 | 2,3,5,8,19,<br>20,22,23  | 3  | P05539,P36376,P36860                                                                                     |
| 5250 | 1,4,6,7,17,<br>18,22,23 | 2,3,5,8,19,<br>20,21,24  | 1  | Q9EQS0                                                                                                   |
| 5251 | 1,4,6,7,17,<br>18,22,24 | 2,3,5,8,19,<br>20,21,23  | 2  | P22006,P36376                                                                                            |
| 5252 | 1,4,6,7,17,<br>18,23,24 | 2,3,5,8,19,<br>20,21,22  | 1  | Q64268                                                                                                   |

|      |                                              |    |                                                                                                       |
|------|----------------------------------------------|----|-------------------------------------------------------------------------------------------------------|
| 5253 | 1,4,6,7,17, 2,3,5,8,18,<br>19,20,21 22,23,24 | 14 | O08815,O35547,P05539,P07647,P11598,P20646,P22283,P24368,P36374,Q63493,Q63617,Q6P6<br>R2,Q9JI85,Q9ROT3 |
| 5254 | 1,4,6,7,17, 2,3,5,8,18,<br>19,20,22 21,23,24 | 6  | O89117,P11598,P36374,Q63617,Q9JJ50,Q9Z0J6                                                             |
| 5255 | 1,4,6,7,17, 2,3,5,8,18,<br>19,20,23 21,22,24 | 4  | P10758,P11598,P36374,Q63617                                                                           |
| 5256 | 1,4,6,7,17, 2,3,5,8,18,<br>19,20,24 21,22,23 | 6  | O35547,P08723,P11598,P22283,P36374,Q63617                                                             |
| 5257 | 1,4,6,7,17, 2,3,5,8,18,<br>19,21,22 20,23,24 | 3  | P05539,P36376,Q9R168                                                                                  |
| 5258 | 1,4,6,7,17, 2,3,5,8,18,<br>19,21,23 20,22,24 | 3  | P21674,Q63474,Q9R168                                                                                  |
| 5259 | 1,4,6,7,17, 2,3,5,8,18,<br>19,21,24 20,22,23 | 7  | P05539,P22283,P36376,Q62761;Q62762;Q62763,Q63474,Q99MH3,Q9R168                                        |
| 5260 | 1,4,6,7,17, 2,3,5,8,18,<br>19,22,23 20,21,24 | 2  | P25809,Q9R168                                                                                         |
| 5261 | 1,4,6,7,17, 2,3,5,8,18,<br>19,22,24 20,21,23 | 5  | P22006,P25809,P36376,P70549,Q9R168                                                                    |
| 5262 | 1,4,6,7,17, 2,3,5,8,18,<br>19,23,24 20,21,22 | 2  | P25809,P70549                                                                                         |
| 5263 | 1,4,6,7,17, 2,3,5,8,18,<br>20,21,22 19,23,24 | 5  | P05539,P11598,P22283,Q63617,Q9Z0J6                                                                    |
| 5264 | 1,4,6,7,17, 2,3,5,8,18,<br>20,21,23 19,22,24 | 1  | P11598                                                                                                |
| 5265 | 1,4,6,7,17, 2,3,5,8,18,<br>20,21,24 19,22,23 | 10 | P02781,P02782,P07647,P08723,P11598,P22283,P36374,Q63617,Q9JHB9,Q9Z2L0                                 |
| 5266 | 1,4,6,7,17, 2,3,5,8,18,<br>20,22,23 19,21,24 | 0  |                                                                                                       |
| 5267 | 1,4,6,7,17, 2,3,5,8,18,<br>20,22,24 19,21,23 | 2  | P22006,Q9Z0J6                                                                                         |
| 5268 | 1,4,6,7,17, 2,3,5,8,18,<br>20,23,24 19,21,22 | 1  | Q9QYP1                                                                                                |
| 5269 | 1,4,6,7,17, 2,3,5,8,18,<br>21,22,23 19,20,24 | 1  | Q9R168                                                                                                |
| 5270 | 1,4,6,7,17, 2,3,5,8,18,<br>21,22,24 19,20,23 | 4  | P05539,P36376,P36860,Q9R168                                                                           |
| 5271 | 1,4,6,7,17, 2,3,5,8,18,<br>21,23,24 19,20,22 | 3  | P36860,Q63474,Q9R168                                                                                  |
| 5272 | 1,4,6,7,17, 2,3,5,8,18,<br>22,23,24 19,20,21 | 5  | P07335,P22006,P25809,P47967,Q9R168                                                                    |

|      |                                              |    |                                                                                         |
|------|----------------------------------------------|----|-----------------------------------------------------------------------------------------|
| 5273 | 1,4,6,7,18, 2,3,5,8,17,<br>19,20,21 22,23,24 | 12 | O08815,P02780,P07647,P0C0A9,P11598,P22283,P36374,Q5PQL7,Q63617,Q9JI85,Q9QW07,Q9<br>ROT3 |
| 5274 | 1,4,6,7,18, 2,3,5,8,17,<br>19,20,22 21,23,24 | 4  | P11598,P22283,Q5PQL7,Q63617                                                             |
| 5275 | 1,4,6,7,18, 2,3,5,8,17,<br>19,20,23 21,22,24 | 3  | P10758,P11598,Q63617                                                                    |
| 5276 | 1,4,6,7,18, 2,3,5,8,17,<br>19,20,24 21,22,23 | 6  | P08723,P11598,P22283,P36374,Q63617,Q9QW07                                               |
| 5277 | 1,4,6,7,18, 2,3,5,8,17,<br>19,21,22 20,23,24 | 3  | P23739,P36376,Q5PQL7                                                                    |
| 5278 | 1,4,6,7,18, 2,3,5,8,17,<br>19,21,23 20,22,24 | 0  |                                                                                         |
| 5279 | 1,4,6,7,18, 2,3,5,8,17,<br>19,21,24 20,22,23 | 3  | P11598,P22283,P36376                                                                    |
| 5280 | 1,4,6,7,18, 2,3,5,8,17,<br>19,22,23 20,21,24 | 2  | Q811M5,Q9EQS0                                                                           |
| 5281 | 1,4,6,7,18, 2,3,5,8,17,<br>19,22,24 20,21,23 | 4  | P19132,P22006,P36376,P63029                                                             |
| 5282 | 1,4,6,7,18, 2,3,5,8,17,<br>19,23,24 20,21,22 | 1  | P25809                                                                                  |
| 5283 | 1,4,6,7,18, 2,3,5,8,17,<br>20,21,22 19,23,24 | 4  | P11598,P22283,Q5PQL7,Q63617                                                             |
| 5284 | 1,4,6,7,18, 2,3,5,8,17,<br>20,21,23 19,22,24 | 4  | P10758,P11598,P22283,Q63617                                                             |
| 5285 | 1,4,6,7,18, 2,3,5,8,17,<br>20,21,24 19,22,23 | 7  | P07647,P11598,P22283,P36376,Q63617,Q9JHB9,Q9QW07                                        |
| 5286 | 1,4,6,7,18, 2,3,5,8,17,<br>20,22,23 19,21,24 | 3  | P54921,Q6AY61,Q9WVK7                                                                    |
| 5287 | 1,4,6,7,18, 2,3,5,8,17,<br>20,22,24 19,21,23 | 3  | P11598,P22006,Q9WVK7                                                                    |
| 5288 | 1,4,6,7,18, 2,3,5,8,17,<br>20,23,24 19,21,22 | 5  | P10758,P11598,P22006,Q9QYP1,Q9WVK7                                                      |
| 5289 | 1,4,6,7,18, 2,3,5,8,17,<br>21,22,23 19,20,24 | 2  | P13676,P54921                                                                           |
| 5290 | 1,4,6,7,18, 2,3,5,8,17,<br>21,22,24 19,20,23 | 3  | P22006,P36376,Q8CJD3                                                                    |
| 5291 | 1,4,6,7,18, 2,3,5,8,17,<br>21,23,24 19,20,22 | 1  | O89117                                                                                  |
| 5292 | 1,4,6,7,18, 2,3,5,8,17,<br>22,23,24 19,20,21 | 8  | P06760,P13676,P22006,P25809,Q64268,Q6P6R2,Q9EQS0,Q9WVK7                                 |

|      |                                              |                                                                                                                                                |
|------|----------------------------------------------|------------------------------------------------------------------------------------------------------------------------------------------------|
| 5293 | 1,4,6,7,19, 2,3,5,8,17,<br>20,21,22 18,23,24 | 7 P0C0A9,P11598,P22283,P36374,Q5PQL7,Q63617,Q99041                                                                                             |
| 5294 | 1,4,6,7,19, 2,3,5,8,17,<br>20,21,23 18,22,24 | 8 O35547,P0C0A9,P10758,P11598,P22283,P36374,Q63617,Q8CJ52                                                                                      |
| 5295 | 1,4,6,7,19, 2,3,5,8,17,<br>20,21,24 18,22,23 | 20 O08815,O35547,P00714,P02781,P02782,P05369,P07647,P08723,P0C0A9,P11598,P22283,P36374,P36376,Q63617,Q812E4,Q8CJ52,Q99MH3,Q9JI85,Q9QW07,Q9R0T3 |
| 5296 | 1,4,6,7,19, 2,3,5,8,17,<br>20,22,23 18,21,24 | 2 P10758,Q63617                                                                                                                                |
| 5297 | 1,4,6,7,19, 2,3,5,8,17,<br>20,22,24 18,21,23 | 7 P08723,P11598,P22006,P22283,P36374,Q63617,Q9QW07                                                                                             |
| 5298 | 1,4,6,7,19, 2,3,5,8,17,<br>20,23,24 18,21,22 | 6 P10758,P11598,P36374,Q63617,Q9QW07,Q9QYP1                                                                                                    |
| 5299 | 1,4,6,7,19, 2,3,5,8,17,<br>21,22,23 18,20,24 | 2 Q811M5,Q9R168                                                                                                                                |
| 5300 | 1,4,6,7,19, 2,3,5,8,17,<br>21,22,24 18,20,23 | 2 P36376,Q9R168                                                                                                                                |
| 5301 | 1,4,6,7,19, 2,3,5,8,17,<br>21,23,24 18,20,22 | 2 P25809,Q63474                                                                                                                                |
| 5302 | 1,4,6,7,19, 2,3,5,8,17,<br>22,23,24 18,20,21 | 5 P13676,P22006,P25809,P70549,Q811M5                                                                                                           |
| 5303 | 1,4,6,7,20, 2,3,5,8,17,<br>21,22,23 18,19,24 | 1 P11598                                                                                                                                       |
| 5304 | 1,4,6,7,20, 2,3,5,8,17,<br>21,22,24 18,19,23 | 6 P01835,P11598,P22006,P22283,P36376,Q63617                                                                                                    |
| 5305 | 1,4,6,7,20, 2,3,5,8,17,<br>21,23,24 18,19,22 | 7 P01835,P10758,P11598,P22283,Q63617,Q8CJ52,Q9QYP1                                                                                             |
| 5306 | 1,4,6,7,20, 2,3,5,8,17,<br>22,23,24 18,19,21 | 3 P22006,Q9QYP1,Q9WVK7                                                                                                                         |
| 5307 | 1,4,6,7,21, 2,3,5,8,17,<br>22,23,24 18,19,20 | 3 P13676,P25809,Q9R168                                                                                                                         |
| 5308 | 1,4,6,8,17, 2,3,5,7,21,<br>18,19,20 22,23,24 | 11 B0LT89,P06911,P08649,P12020,P13432,P22282,P36374,P47727,Q5GRG2,Q62714,Q9JI85                                                                |
| 5309 | 1,4,6,8,17, 2,3,5,7,20,<br>18,19,21 22,23,24 | 3 P13432,Q9JI85,Q9QX74                                                                                                                         |
| 5310 | 1,4,6,8,17, 2,3,5,7,20,<br>18,19,22 21,23,24 | 3 P08649,P13432,Q6AY61                                                                                                                         |
| 5311 | 1,4,6,8,17, 2,3,5,7,20,<br>18,19,23 21,22,24 | 3 P08649,P13432,P21674                                                                                                                         |
| 5312 | 1,4,6,8,17, 2,3,5,7,20,<br>18,19,24 21,22,23 | 4 O54728,P08649,P13432,P70549                                                                                                                  |



|      |                                              |                                                                                                                                         |
|------|----------------------------------------------|-----------------------------------------------------------------------------------------------------------------------------------------|
| 5313 | 1,4,6,8,17, 2,3,5,7,19,<br>18,20,21 22,23,24 | 7 P06911,P13432,P19223,P47727,Q10758,Q5GRG2,Q9JI85                                                                                      |
| 5314 | 1,4,6,8,17, 2,3,5,7,19,<br>18,20,22 21,23,24 | 6 P06911,P08649,P12020,P13432,Q5GRG2,Q6AY61                                                                                             |
| 5315 | 1,4,6,8,17, 2,3,5,7,19,<br>18,20,23 21,22,24 | 3 P06911,P13432,Q5GRG2                                                                                                                  |
| 5316 | 1,4,6,8,17, 2,3,5,7,19,<br>18,20,24 21,22,23 | 6 P06911,P12020,P13432,P47727,Q5GRG2,Q9QW07                                                                                             |
| 5317 | 1,4,6,8,17, 2,3,5,7,19,<br>18,21,22 20,23,24 | 1 P13432                                                                                                                                |
| 5318 | 1,4,6,8,17, 2,3,5,7,19,<br>18,21,23 20,22,24 | 1 P13432                                                                                                                                |
| 5319 | 1,4,6,8,17, 2,3,5,7,19,<br>18,21,24 20,22,23 | 2 P13432,Q63474                                                                                                                         |
| 5320 | 1,4,6,8,17, 2,3,5,7,19,<br>18,22,23 20,21,24 | 4 P08649,P13432,P47967,Q6AY61                                                                                                           |
| 5321 | 1,4,6,8,17, 2,3,5,7,19,<br>18,22,24 20,21,23 | 4 P08649,P13432,P22006,P47967                                                                                                           |
| 5322 | 1,4,6,8,17, 2,3,5,7,19,<br>18,23,24 20,21,22 | 2 P13432,P47967                                                                                                                         |
| 5323 | 1,4,6,8,17, 2,3,5,7,18,<br>19,20,21 22,23,24 | 19 B0LT89,O08815,O35547,P04905,P06911,P07647,P08723,P22282,P22283,P24368,P30120,P36374,P46462,P47727,Q5GRG2,Q63493,Q6P6R2,Q812E4,Q9JI85 |
| 5324 | 1,4,6,8,17, 2,3,5,7,18,<br>19,20,22 21,23,24 | 9 B0LT89,O89117,P06911,P15399,P20766,P36374,Q5GRG2,Q9JI85,Q9JJ50                                                                        |
| 5325 | 1,4,6,8,17, 2,3,5,7,18,<br>19,20,23 21,22,24 | 5 P06911,P10758,P36374,Q5GRG2,Q9JI85                                                                                                    |
| 5326 | 1,4,6,8,17, 2,3,5,7,18,<br>19,20,24 21,22,23 | 15 B0LT89,O35547,O54728,P06911,P08723,P13432,P22282,P30120,P36374,P47727,P60905,Q5GRG2,Q6RUV5,Q9JI85,Q9QW07                             |
| 5327 | 1,4,6,8,17, 2,3,5,7,18,<br>19,21,22 20,23,24 | 1 P20766                                                                                                                                |
| 5328 | 1,4,6,8,17, 2,3,5,7,18,<br>19,21,23 20,22,24 | 2 P21674,Q63474                                                                                                                         |
| 5329 | 1,4,6,8,17, 2,3,5,7,18,<br>19,21,24 20,22,23 | 4 O54728,P02782,Q63474,Q9JI85                                                                                                           |
| 5330 | 1,4,6,8,17, 2,3,5,7,18,<br>19,22,23 20,21,24 | 3 P00507,P47967,Q6AY61                                                                                                                  |
| 5331 | 1,4,6,8,17, 2,3,5,7,18,<br>19,22,24 20,21,23 | 4 O54728,P00507,P47967,P70549                                                                                                           |
| 5332 | 1,4,6,8,17, 2,3,5,7,18,<br>19,23,24 20,21,22 | 3 O54728,P47967,P70549                                                                                                                  |

|      |                                              |    |                                                                                                                        |
|------|----------------------------------------------|----|------------------------------------------------------------------------------------------------------------------------|
| 5333 | 1,4,6,8,17, 2,3,5,7,18,<br>20,21,22 19,23,24 | 4  | P06911,P20766,Q5GRG2,Q9JI85                                                                                            |
| 5334 | 1,4,6,8,17, 2,3,5,7,18,<br>20,21,23 19,22,24 | 2  | P06911,P20766                                                                                                          |
| 5335 | 1,4,6,8,17, 2,3,5,7,18,<br>20,21,24 19,22,23 | 17 | P02781,P02782,P06911,P07647,P08723,P20766,P30120,P36374,P47727,P60905,Q5GRG2,Q63474,Q6AYR9,Q812E4,Q9JHB9,Q9JI85,Q9Z2L0 |
| 5336 | 1,4,6,8,17, 2,3,5,7,18,<br>20,22,23 19,21,24 | 3  | P06911,P20766,Q6AY61                                                                                                   |
| 5337 | 1,4,6,8,17, 2,3,5,7,18,<br>20,22,24 19,21,23 | 4  | P06911,P20766,P22006,Q5GRG2                                                                                            |
| 5338 | 1,4,6,8,17, 2,3,5,7,18,<br>20,23,24 19,21,22 | 2  | P06911,Q9QYP1                                                                                                          |
| 5339 | 1,4,6,8,17, 2,3,5,7,18,<br>21,22,23 19,20,24 | 2  | P20766,P47967                                                                                                          |
| 5340 | 1,4,6,8,17, 2,3,5,7,18,<br>21,22,24 19,20,23 | 3  | P20766,Q63474,Q6AYR9                                                                                                   |
| 5341 | 1,4,6,8,17, 2,3,5,7,18,<br>21,23,24 19,20,22 | 3  | P47967,Q63474,Q6AYR9                                                                                                   |
| 5342 | 1,4,6,8,17, 2,3,5,7,18,<br>22,23,24 19,20,21 | 5  | P00507,P07335,P47967,P62804,Q5I0D1                                                                                     |
| 5343 | 1,4,6,8,18, 2,3,5,7,17,<br>19,20,21 22,23,24 | 13 | B0LT89,O08815,O35547,P02780,P04905,P0C0A9,P22282,P22283,P36374,P47727,Q63493,Q9JI85,Q9QW07                             |
| 5344 | 1,4,6,8,18, 2,3,5,7,17,<br>19,20,22 21,23,24 | 6  | P12020,P15399,P36374,Q6AY61,Q9JI85,Q9QW07                                                                              |
| 5345 | 1,4,6,8,18, 2,3,5,7,17,<br>19,20,23 21,22,24 | 3  | P10758,Q9QW07,Q9R168                                                                                                   |
| 5346 | 1,4,6,8,18, 2,3,5,7,17,<br>19,20,24 21,22,23 | 9  | O54728,P08723,P22282,P36374,P60905,Q5GRG2,Q9JI85,Q9QW07,Q9R168                                                         |
| 5347 | 1,4,6,8,18, 2,3,5,7,17,<br>19,21,22 20,23,24 | 1  | Q6AY61                                                                                                                 |
| 5348 | 1,4,6,8,18, 2,3,5,7,17,<br>19,21,23 20,22,24 | 0  |                                                                                                                        |
| 5349 | 1,4,6,8,18, 2,3,5,7,17,<br>19,21,24 20,22,23 | 2  | O54728,Q9JI85                                                                                                          |
| 5350 | 1,4,6,8,18, 2,3,5,7,17,<br>19,22,23 20,21,24 | 3  | P00507,Q6AY61,Q811M5                                                                                                   |
| 5351 | 1,4,6,8,18, 2,3,5,7,17,<br>19,22,24 20,21,23 | 4  | O54728,P00507,P15399,P22006                                                                                            |
| 5352 | 1,4,6,8,18, 2,3,5,7,17,<br>19,23,24 20,21,22 | 1  | O54728                                                                                                                 |

|      |                                              |                                                                                                                                                                     |
|------|----------------------------------------------|---------------------------------------------------------------------------------------------------------------------------------------------------------------------|
| 5353 | 1,4,6,8,18, 2,3,5,7,17,<br>20,21,22 19,23,24 | 4 P12020,P54921,Q5PQL7,Q6AY61                                                                                                                                       |
| 5354 | 1,4,6,8,18, 2,3,5,7,17,<br>20,21,23 19,22,24 | 1 P54921                                                                                                                                                            |
| 5355 | 1,4,6,8,18, 2,3,5,7,17,<br>20,21,24 19,22,23 | 7 P02782,P08723,P30120,Q6AYR9,Q9JHB9,Q9JI85,Q9QW07                                                                                                                  |
| 5356 | 1,4,6,8,18, 2,3,5,7,17,<br>20,22,23 19,21,24 | 2 P54921,Q6AY61                                                                                                                                                     |
| 5357 | 1,4,6,8,18, 2,3,5,7,17,<br>20,22,24 19,21,23 | 4 P06911,P12020,P22006,Q9QW07                                                                                                                                       |
| 5358 | 1,4,6,8,18, 2,3,5,7,17,<br>20,23,24 19,21,22 | 4 Q9QW07,Q9QYP1,Q9R168,Q9WVK7                                                                                                                                       |
| 5359 | 1,4,6,8,18, 2,3,5,7,17,<br>21,22,23 19,20,24 | 3 P54921,Q63532,Q6AY61                                                                                                                                              |
| 5360 | 1,4,6,8,18, 2,3,5,7,17,<br>21,22,24 19,20,23 | 0                                                                                                                                                                   |
| 5361 | 1,4,6,8,18, 2,3,5,7,17,<br>21,23,24 19,20,22 | 0                                                                                                                                                                   |
| 5362 | 1,4,6,8,18, 2,3,5,7,17,<br>22,23,24 19,20,21 | 6 P00507,P13676,P22006,P47967,Q6AY61,Q9WVK7                                                                                                                         |
| 5363 | 1,4,6,8,19, 2,3,5,7,17,<br>20,21,22 18,23,24 | 11 O35547,P02780,P15399,P19218,P20766,P22282,P36374,Q5PQL7,Q99041,Q9JI85,Q9QW07                                                                                     |
| 5364 | 1,4,6,8,19, 2,3,5,7,17,<br>20,21,23 18,22,24 | 9 O35547,P10758,P19629,P22282,P36374,Q63493,Q812E4,Q9JI85,Q9QW07                                                                                                    |
| 5365 | 1,4,6,8,19, 2,3,5,7,17,<br>20,21,24 18,22,23 | 23 O08815,O35547,O54728,P02780,P02781,P02782,P04905,P07647,P08723,P09456,P0C0A9,P22282,P22283,P24368,P30120,P36374,P46462,P60905,Q63474,Q6AYR9,Q812E4,Q9JI85,Q9QW07 |
| 5366 | 1,4,6,8,19, 2,3,5,7,17,<br>20,22,23 18,21,24 | 4 P10758,P15399,P19218,Q6AY61                                                                                                                                       |
| 5367 | 1,4,6,8,19, 2,3,5,7,17,<br>20,22,24 18,21,23 | 8 O54728,P08723,P15399,P22006,P36374,P60905,Q9JI85,Q9QW07                                                                                                           |
| 5368 | 1,4,6,8,19, 2,3,5,7,17,<br>20,23,24 18,21,22 | 6 O54728,P08723,P10758,P36374,Q812E4,Q9QW07                                                                                                                         |
| 5369 | 1,4,6,8,19, 2,3,5,7,17,<br>21,22,23 18,20,24 | 2 Q6AY61,Q811M5                                                                                                                                                     |
| 5370 | 1,4,6,8,19, 2,3,5,7,17,<br>21,22,24 18,20,23 | 2 O54728,P30919                                                                                                                                                     |
| 5371 | 1,4,6,8,19, 2,3,5,7,17,<br>21,23,24 18,20,22 | 2 O54728,Q63474                                                                                                                                                     |
| 5372 | 1,4,6,8,19, 2,3,5,7,17,<br>22,23,24 18,20,21 | 8 O54728,P00507,P22006,P25809,P47967,P70549,Q6AY61,Q811M5                                                                                                           |

|      |                                              |                                                    |
|------|----------------------------------------------|----------------------------------------------------|
| 5373 | 1,4,6,8,20, 2,3,5,7,17,<br>21,22,23 18,19,24 | 4 P19629,P20766,P54921,Q6AY61                      |
| 5374 | 1,4,6,8,20, 2,3,5,7,17,<br>21,22,24 18,19,23 | 7 P02782,P08723,P20766,P22006,Q10743,Q6AYR9,Q9QW07 |
| 5375 | 1,4,6,8,20, 2,3,5,7,17,<br>21,23,24 18,19,22 | 4 Q63474,Q6AYR9,Q812E4,Q9QW07                      |
| 5376 | 1,4,6,8,20, 2,3,5,7,17,<br>22,23,24 18,19,21 | 3 P20766,P22006,Q6AY61                             |
| 5377 | 1,4,6,8,21, 2,3,5,7,17,<br>22,23,24 18,19,20 | 4 P20766,P30919,Q63474,Q63532                      |
| 5378 | 1,4,6,17,1 2,3,5,7,8,2<br>8,19,20,21 2,23,24 | 6 BOLT89,O08815,P35280,P36374,Q62714,Q6P6R2        |
| 5379 | 1,4,6,17,1 2,3,5,7,8,2<br>8,19,20,22 1,23,24 | 1 Q62714                                           |
| 5380 | 1,4,6,17,1 2,3,5,7,8,2<br>8,19,20,23 1,22,24 | 4 P10758,P11883,P35280,Q62714                      |
| 5381 | 1,4,6,17,1 2,3,5,7,8,2<br>8,19,20,24 1,22,23 | 4 P11883,P35280,P36374,Q62714                      |
| 5382 | 1,4,6,17,1 2,3,5,7,8,2<br>8,19,21,22 0,23,24 | 1 P36376                                           |
| 5383 | 1,4,6,17,1 2,3,5,7,8,2<br>8,19,21,23 0,22,24 | 1 P35280                                           |
| 5384 | 1,4,6,17,1 2,3,5,7,8,2<br>8,19,21,24 0,22,23 | 2 P35280,P36376                                    |
| 5385 | 1,4,6,17,1 2,3,5,7,8,2<br>8,19,22,23 0,21,24 | 5 P11883,P47967,P70549,Q811M5,Q9EQS0               |
| 5386 | 1,4,6,17,1 2,3,5,7,8,2<br>8,19,22,24 0,21,23 | 4 P19132,P22006,P36376,P70549                      |
| 5387 | 1,4,6,17,1 2,3,5,7,8,2<br>8,19,23,24 0,21,22 | 4 P11883,P35280,P47967,P70549                      |
| 5388 | 1,4,6,17,1 2,3,5,7,8,1<br>8,20,21,22 9,23,24 | 1 Q5PQL7                                           |
| 5389 | 1,4,6,17,1 2,3,5,7,8,1<br>8,20,21,23 9,22,24 | 2 P11883,P35280                                    |
| 5390 | 1,4,6,17,1 2,3,5,7,8,1<br>8,20,21,24 9,22,23 | 1 P35280                                           |
| 5391 | 1,4,6,17,1 2,3,5,7,8,1<br>8,20,22,23 9,21,24 | 2 P04355,P11883                                    |
| 5392 | 1,4,6,17,1 2,3,5,7,8,1<br>8,20,22,24 9,21,23 | 2 P11883,P22006                                    |

|      |                                              |                                                                                 |
|------|----------------------------------------------|---------------------------------------------------------------------------------|
| 5393 | 1,4,6,17,1 2,3,5,7,8,1<br>8,20,23,24 9,21,22 | 3 P11883,P35280,Q9QYP1                                                          |
| 5394 | 1,4,6,17,1 2,3,5,7,8,1<br>8,21,22,23 9,20,24 | 0                                                                               |
| 5395 | 1,4,6,17,1 2,3,5,7,8,1<br>8,21,22,24 9,20,23 | 2 P36376,Q8CJD3                                                                 |
| 5396 | 1,4,6,17,1 2,3,5,7,8,1<br>8,21,23,24 9,20,22 | 1 P35280                                                                        |
| 5397 | 1,4,6,17,1 2,3,5,7,8,1<br>8,22,23,24 9,20,21 | 11 D4A5U3,P06760,P11883,P22006,P47967,P62804,P70549,Q00715,Q5I0D1,Q9EQS0,Q9WTT6 |
| 5398 | 1,4,6,17,1 2,3,5,7,8,1<br>9,20,21,22 8,23,24 | 5 B0LT89,P20766,P36374,Q5PQL7,Q9JJ50                                            |
| 5399 | 1,4,6,17,1 2,3,5,7,8,1<br>9,20,21,23 8,22,24 | 4 P10758,P20766,P35280,P36374                                                   |
| 5400 | 1,4,6,17,1 2,3,5,7,8,1<br>9,20,21,24 8,22,23 | 9 B0LT89,O35547,P07647,P20766,P35280,P36374,P60905,Q99MH3,Q9Z2L0                |
| 5401 | 1,4,6,17,1 2,3,5,7,8,1<br>9,20,22,23 8,21,24 | 3 O89117,P20766,Q00715                                                          |
| 5402 | 1,4,6,17,1 2,3,5,7,8,1<br>9,20,22,24 8,21,23 | 7 O89117,P20766,P22006,P36374,P70549,Q00715,Q9JJ50                              |
| 5403 | 1,4,6,17,1 2,3,5,7,8,1<br>9,20,23,24 8,21,22 | 7 P10758,P11883,P35280,P36374,P70549,Q00715,Q9QYP1                              |
| 5404 | 1,4,6,17,1 2,3,5,7,8,1<br>9,21,22,23 8,20,24 | 1 P20766                                                                        |
| 5405 | 1,4,6,17,1 2,3,5,7,8,1<br>9,21,22,24 8,20,23 | 3 P20766,P36376,Q9R168                                                          |
| 5406 | 1,4,6,17,1 2,3,5,7,8,1<br>9,21,23,24 8,20,22 | 2 P35280,Q63474                                                                 |
| 5407 | 1,4,6,17,1 2,3,5,7,8,1<br>9,22,23,24 8,20,21 | 10 P00507,P06760,P07335,P22006,P25809,P47967,P62804,P70549,Q00715,Q811M5        |
| 5408 | 1,4,6,17,2 2,3,5,7,8,1<br>0,21,22,23 8,19,24 | 1 P20766                                                                        |
| 5409 | 1,4,6,17,2 2,3,5,7,8,1<br>0,21,22,24 8,19,23 | 2 P20766,P22006                                                                 |
| 5410 | 1,4,6,17,2 2,3,5,7,8,1<br>0,21,23,24 8,19,22 | 3 P20766,P35280,Q9QYP1                                                          |
| 5411 | 1,4,6,17,2 2,3,5,7,8,1<br>0,22,23,24 8,19,21 | 9 P06760,P08937,P11883,P20766,P22006,P47967,P62804,Q00715,Q9QYP1                |
| 5412 | 1,4,6,17,2 2,3,5,7,8,1<br>1,22,23,24 8,19,20 | 4 P20766,P47967,Q5I0D1,Q9R168                                                   |

|      |                                              |                                                                                                   |
|------|----------------------------------------------|---------------------------------------------------------------------------------------------------|
| 5413 | 1,4,6,18,1 2,3,5,7,8,1<br>9,20,21,22 7,23,24 | 1 Q5PQL7                                                                                          |
| 5414 | 1,4,6,18,1 2,3,5,7,8,1<br>9,20,21,23 7,22,24 | 2 P10758,P35280                                                                                   |
| 5415 | 1,4,6,18,1 2,3,5,7,8,1<br>9,20,21,24 7,22,23 | 5 O08815,O35547,P07647,P35280,P36374                                                              |
| 5416 | 1,4,6,18,1 2,3,5,7,8,1<br>9,20,22,23 7,21,24 | 5 P04355,P04762,P10758,Q6AY61,Q811M5                                                              |
| 5417 | 1,4,6,18,1 2,3,5,7,8,1<br>9,20,22,24 7,21,23 | 1 P22006                                                                                          |
| 5418 | 1,4,6,18,1 2,3,5,7,8,1<br>9,20,23,24 7,21,22 | 5 P10758,P11883,P22006,P35280,Q9QYP1                                                              |
| 5419 | 1,4,6,18,1 2,3,5,7,8,1<br>9,21,22,23 7,20,24 | 3 P13676,Q6AY61,Q811M5                                                                            |
| 5420 | 1,4,6,18,1 2,3,5,7,8,1<br>9,21,22,24 7,20,23 | 4 P13676,P22006,P36376,Q4G075                                                                     |
| 5421 | 1,4,6,18,1 2,3,5,7,8,1<br>9,21,23,24 7,20,22 | 3 P13676,P35280,Q4G075                                                                            |
| 5422 | 1,4,6,18,1 2,3,5,7,8,1<br>9,22,23,24 7,20,21 | 13 D4A5U3,P00507,P06760,P13676,P22006,P25809,P47967,P62804,P70549,Q00715,Q811M5,Q9E<br>QS0,Q9WTT6 |
| 5423 | 1,4,6,18,2 2,3,5,7,8,1<br>0,21,22,23 7,19,24 | 2 P54921,Q6AY61                                                                                   |
| 5424 | 1,4,6,18,2 2,3,5,7,8,1<br>0,21,22,24 7,19,23 | 2 P22006,Q8CJD3                                                                                   |
| 5425 | 1,4,6,18,2 2,3,5,7,8,1<br>0,21,23,24 7,19,22 | 2 P35280,Q9QYP1                                                                                   |
| 5426 | 1,4,6,18,2 2,3,5,7,8,1<br>0,22,23,24 7,19,21 | 11 P04355,P06760,P11883,P22006,P62804,Q00715,Q5QE79,Q66H69,Q9QX74,Q9QYP1,Q9WVK7                   |
| 5427 | 1,4,6,18,2 2,3,5,7,8,1<br>1,22,23,24 7,19,20 | 7 D4A5U3,P13676,P22006,Q4G075,Q5U2V4,Q811M5,Q9WTT6                                                |
| 5428 | 1,4,6,19,2 2,3,5,7,8,1<br>0,21,22,23 7,18,24 | 2 P10758,P20766                                                                                   |
| 5429 | 1,4,6,19,2 2,3,5,7,8,1<br>0,21,22,24 7,18,23 | 6 O35547,O70594,P12368,P20766,P22006,P36374                                                       |
| 5430 | 1,4,6,19,2 2,3,5,7,8,1<br>0,21,23,24 7,18,22 | 4 O35547,P10758,P35280,P36374                                                                     |
| 5431 | 1,4,6,19,2 2,3,5,7,8,1<br>0,22,23,24 7,18,21 | 8 P06760,P10758,P20766,P22006,P62804,Q00715,Q811M5,Q9QX74                                         |
| 5432 | 1,4,6,19,2 2,3,5,7,8,1<br>1,22,23,24 7,18,20 | 4 P13676,P20766,P25809,Q811M5                                                                     |

|      |                                              |    |                                                                                                                                                                                                                                                       |
|------|----------------------------------------------|----|-------------------------------------------------------------------------------------------------------------------------------------------------------------------------------------------------------------------------------------------------------|
| 5433 | 1,4,6,20,2 2,3,5,7,8,1<br>1,22,23,24 7,18,19 | 2  | P20766,P22006                                                                                                                                                                                                                                         |
| 5434 | 1,4,7,8,17, 2,3,5,6,21,<br>18,19,20 22,23,24 | 16 | B0LT89,P02780,P06911,P07150,P08723,P20646,P22282,P30919,P36374,P47727,Q4G075,Q6271<br>4,Q811M5,Q812E4,Q9QX74,Q9WTT6                                                                                                                                   |
| 5435 | 1,4,7,8,17, 2,3,5,6,20,<br>18,19,21 22,23,24 | 8  | P20646,P21674,P22282,Q66H69,Q6P6R2,Q99MH3,Q9QX74,Q9Z2L0                                                                                                                                                                                               |
| 5436 | 1,4,7,8,17, 2,3,5,6,20,<br>18,19,22 21,23,24 | 1  | P20646                                                                                                                                                                                                                                                |
| 5437 | 1,4,7,8,17, 2,3,5,6,20,<br>18,19,23 21,22,24 | 2  | P20646,P21674                                                                                                                                                                                                                                         |
| 5438 | 1,4,7,8,17, 2,3,5,6,20,<br>18,19,24 21,22,23 | 4  | O54728,P09656,P20646,Q99MH3                                                                                                                                                                                                                           |
| 5439 | 1,4,7,8,17, 2,3,5,6,19,<br>18,20,21 22,23,24 | 14 | P00507,P02780,P06911,P19223,P20646,P47727,Q63493,Q6P6R2,Q811M5,Q812E4,Q9JHB9,Q9<br>QX74,Q9WTT6,Q9Z2L0                                                                                                                                                 |
| 5440 | 1,4,7,8,17, 2,3,5,6,19,<br>18,20,22 21,23,24 | 2  | P06911,Q4G075                                                                                                                                                                                                                                         |
| 5441 | 1,4,7,8,17, 2,3,5,6,19,<br>18,20,23 21,22,24 | 4  | P06911,P10758,P30919,Q4G075                                                                                                                                                                                                                           |
| 5442 | 1,4,7,8,17, 2,3,5,6,19,<br>18,20,24 21,22,23 | 7  | P06911,P08723,P47727,Q811M5,Q812E4,Q9JHB9,Q9Z2L0                                                                                                                                                                                                      |
| 5443 | 1,4,7,8,17, 2,3,5,6,19,<br>18,21,22 20,23,24 | 2  | Q9QX74,Q9Z1F2                                                                                                                                                                                                                                         |
| 5444 | 1,4,7,8,17, 2,3,5,6,19,<br>18,21,23 20,22,24 | 4  | P21674,Q9QX74,Q9Z0V6,Q9Z1F2                                                                                                                                                                                                                           |
| 5445 | 1,4,7,8,17, 2,3,5,6,19,<br>18,21,24 20,22,23 | 6  | P02782,Q811M5,Q99MH3,Q9QX74,Q9Z1F2,Q9Z2L0                                                                                                                                                                                                             |
| 5446 | 1,4,7,8,17, 2,3,5,6,19,<br>18,22,23 20,21,24 | 2  | Q5I0J9,Q9Z1F2                                                                                                                                                                                                                                         |
| 5447 | 1,4,7,8,17, 2,3,5,6,19,<br>18,22,24 20,21,23 | 1  | Q9Z1F2                                                                                                                                                                                                                                                |
| 5448 | 1,4,7,8,17, 2,3,5,6,19,<br>18,23,24 20,21,22 | 3  | Q5I0J9,Q64268,Q9Z1F2                                                                                                                                                                                                                                  |
| 5449 | 1,4,7,8,17, 2,3,5,6,18,<br>19,20,21 22,23,24 | 34 | B0LT89,D4A5U3,O08815,P02780,P02781,P02782,P04905,P06760,P08723,P09456,P0C0A9,P136<br>76,P19223,P20646,P22282,P22283,P24368,P30120,P36374,P40241,P46462,P47727,Q4G075,Q5<br>M8C6,Q63493,Q63617,Q66H69,Q6P6R2,Q811M5,Q812E4,Q99MH3,Q9QX74,Q9WTT6,Q9Z2L0 |
| 5450 | 1,4,7,8,17, 2,3,5,6,18,<br>19,20,22 21,23,24 | 7  | P02780,P06911,P20646,P36374,Q4G075,Q9JJ50,Q9WTT6                                                                                                                                                                                                      |
| 5451 | 1,4,7,8,17, 2,3,5,6,18,<br>19,20,23 21,22,24 | 7  | P10758,P20646,P21674,P36374,Q4G075,Q812E4,Q9WTT6                                                                                                                                                                                                      |
| 5452 | 1,4,7,8,17, 2,3,5,6,18,<br>19,20,24 21,22,23 | 17 | O54728,P02780,P02781,P06911,P08723,P09456,P20646,P22282,P30120,P36374,P47727,P6090<br>5,Q812E4,Q99MH3,Q9JHB9,Q9WTT6,Q9Z2L0                                                                                                                            |

|      |                                              |    |                                                                                                                                      |
|------|----------------------------------------------|----|--------------------------------------------------------------------------------------------------------------------------------------|
| 5453 | 1,4,7,8,17, 2,3,5,6,18,<br>19,21,22 20,23,24 | 3  | P20646,Q9QX74,Q9Z2L0                                                                                                                 |
| 5454 | 1,4,7,8,17, 2,3,5,6,18,<br>19,21,23 20,22,24 | 5  | P20646,P21674,Q63474,Q9QX74,Q9Z0V6                                                                                                   |
| 5455 | 1,4,7,8,17, 2,3,5,6,18,<br>19,21,24 20,22,23 | 12 | O54728,P02782,P04355,P08723,P16636,P20646,P22282,Q63474,Q66H69,Q99MH3,Q9QX74,Q9Z2L0                                                  |
| 5456 | 1,4,7,8,17, 2,3,5,6,18,<br>19,22,23 20,21,24 | 0  |                                                                                                                                      |
| 5457 | 1,4,7,8,17, 2,3,5,6,18,<br>19,22,24 20,21,23 | 1  | O54728                                                                                                                               |
| 5458 | 1,4,7,8,17, 2,3,5,6,18,<br>19,23,24 20,21,22 | 1  | O54728                                                                                                                               |
| 5459 | 1,4,7,8,17, 2,3,5,6,18,<br>20,21,22 19,23,24 | 4  | P19223,Q4G075,Q9WTT6,Q9Z2L0                                                                                                          |
| 5460 | 1,4,7,8,17, 2,3,5,6,18,<br>20,21,23 19,22,24 | 7  | P19223,P21674,Q4G075,Q63493,Q6AYR9,Q812E4,Q9WTT6                                                                                     |
| 5461 | 1,4,7,8,17, 2,3,5,6,18,<br>20,21,24 19,22,23 | 17 | P02781,P02782,P08723,P09456,P19223,P30120,P36374,P47727,Q5M8C6,Q63474,Q6AYR9,Q811M5,Q812E4,Q99MH3,Q9JHB9,Q9WTT6,Q9Z2L0               |
| 5462 | 1,4,7,8,17, 2,3,5,6,18,<br>20,22,23 19,21,24 | 1  | Q4G075                                                                                                                               |
| 5463 | 1,4,7,8,17, 2,3,5,6,18,<br>20,22,24 19,21,23 | 5  | P06911,P08723,Q9JHB9,Q9JJ50,Q9Z2L0                                                                                                   |
| 5464 | 1,4,7,8,17, 2,3,5,6,18,<br>20,23,24 19,21,22 | 3  | P10758,Q812E4,Q9QYP1                                                                                                                 |
| 5465 | 1,4,7,8,17, 2,3,5,6,18,<br>21,22,23 19,20,24 | 0  |                                                                                                                                      |
| 5466 | 1,4,7,8,17, 2,3,5,6,18,<br>21,22,24 19,20,23 | 4  | P02782,Q6AYR9,Q9Z1F2,Q9Z2L0                                                                                                          |
| 5467 | 1,4,7,8,17, 2,3,5,6,18,<br>21,23,24 19,20,22 | 3  | Q63474,Q6AYR9,Q9Z1F2                                                                                                                 |
| 5468 | 1,4,7,8,17, 2,3,5,6,18,<br>22,23,24 19,20,21 | 1  | P47967                                                                                                                               |
| 5469 | 1,4,7,8,18, 2,3,5,6,17,<br>19,20,21 22,23,24 | 19 | O08815,P01039,P02780,P04905,P08723,P0C0A9,P22273,P22282,P22283,P24368,P30120,P36374,P47727,Q5I0D1,Q63493,Q63617,Q812E4,Q9QW07,Q9WTT6 |
| 5470 | 1,4,7,8,18, 2,3,5,6,17,<br>19,20,22 21,23,24 | 7  | P01039,P02780,P0C0A9,P22282,P36374,Q4G075,Q6AY61                                                                                     |
| 5471 | 1,4,7,8,18, 2,3,5,6,17,<br>19,20,23 21,22,24 | 6  | P01039,P0C0A9,P10758,P36374,Q4G075,Q812E4                                                                                            |
| 5472 | 1,4,7,8,18, 2,3,5,6,17,<br>19,20,24 21,22,23 | 12 | O08815,O54728,P02780,P08723,P0C0A9,P22282,P36374,P47727,P60905,Q812E4,Q9JHB9,Q9QW07                                                  |



|      |                                              |                                                                                                                                                                                                                                 |
|------|----------------------------------------------|---------------------------------------------------------------------------------------------------------------------------------------------------------------------------------------------------------------------------------|
| 5473 | 1,4,7,8,18, 2,3,5,6,17,<br>19,21,22 20,23,24 | 1 P01039                                                                                                                                                                                                                        |
| 5474 | 1,4,7,8,18, 2,3,5,6,17,<br>19,21,23 20,22,24 | 2 P01039,P21674                                                                                                                                                                                                                 |
| 5475 | 1,4,7,8,18, 2,3,5,6,17,<br>19,21,24 20,22,23 | 8 O54728,P02782,P0C0A9,P22282,P63029,Q66H69,Q99MH3,Q9Z2L0                                                                                                                                                                       |
| 5476 | 1,4,7,8,18, 2,3,5,6,17,<br>19,22,23 20,21,24 | 4 P01039,P63029,Q5I0J9,Q6AY61                                                                                                                                                                                                   |
| 5477 | 1,4,7,8,18, 2,3,5,6,17,<br>19,22,24 20,21,23 | 2 O54728,P63029                                                                                                                                                                                                                 |
| 5478 | 1,4,7,8,18, 2,3,5,6,17,<br>19,23,24 20,21,22 | 3 O54728,P63029,Q5I0J9                                                                                                                                                                                                          |
| 5479 | 1,4,7,8,18, 2,3,5,6,17,<br>20,21,22 19,23,24 | 2 P01039,P02780                                                                                                                                                                                                                 |
| 5480 | 1,4,7,8,18, 2,3,5,6,17,<br>20,21,23 19,22,24 | 3 P01039,P10758,Q812E4                                                                                                                                                                                                          |
| 5481 | 1,4,7,8,18, 2,3,5,6,17,<br>20,21,24 19,22,23 | 15 P02780,P02781,P02782,P08723,P22282,P22283,P30120,P47727,Q5M8C6,Q6AYR9,Q811M5,Q812E4,Q9JHB9,Q9QW07,Q9Z2L0                                                                                                                     |
| 5482 | 1,4,7,8,18, 2,3,5,6,17,<br>20,22,23 19,21,24 | 5 P01039,P10758,P54921,Q4G075,Q6AY61                                                                                                                                                                                            |
| 5483 | 1,4,7,8,18, 2,3,5,6,17,<br>20,22,24 19,21,23 | 1 Q9JHB9                                                                                                                                                                                                                        |
| 5484 | 1,4,7,8,18, 2,3,5,6,17,<br>20,23,24 19,21,22 | 4 P10758,Q812E4,Q9QYP1,Q9WVK7                                                                                                                                                                                                   |
| 5485 | 1,4,7,8,18, 2,3,5,6,17,<br>21,22,23 19,20,24 | 4 P01039,P54921,Q6AY61,Q9Z1F2                                                                                                                                                                                                   |
| 5486 | 1,4,7,8,18, 2,3,5,6,17,<br>21,22,24 19,20,23 | 1 Q9Z1F2                                                                                                                                                                                                                        |
| 5487 | 1,4,7,8,18, 2,3,5,6,17,<br>21,23,24 19,20,22 | 2 O89117,Q9Z1F2                                                                                                                                                                                                                 |
| 5488 | 1,4,7,8,18, 2,3,5,6,17,<br>22,23,24 19,20,21 | 5 P49134,P63029,Q5I0J9,Q64268,Q9WVK7                                                                                                                                                                                            |
| 5489 | 1,4,7,8,19, 2,3,5,6,17,<br>20,21,22 18,23,24 | 13 P01039,P02780,P04905,P08723,P0C0A9,P22282,P22283,P36374,Q63493,Q63617,Q812E4,Q9WTT6,Q9Z2L0                                                                                                                                   |
| 5490 | 1,4,7,8,19, 2,3,5,6,17,<br>20,21,23 18,22,24 | 11 P01039,P02780,P0C0A9,P10758,P22282,P22283,P36374,Q63493,Q63617,Q812E4,Q9WTT6                                                                                                                                                 |
| 5491 | 1,4,7,8,19, 2,3,5,6,17,<br>20,21,24 18,22,23 | O08815,O35547,O54728,P02780,P02781,P02782,P04905,P07647,P08723,P09456,P0C0A9,P16632,P22282,P22283,P24368,P30120,P36374,P40241,P46462,P47727,P60905,Q5M8C6,Q63493,Q63617,Q6AYR9,Q6Q7Y5,Q812E4,Q8CJ52,Q99MH3,Q9JHB9,Q9QW07,Q9Z2L0 |
| 5492 | 1,4,7,8,19, 2,3,5,6,17,<br>20,22,23 18,21,24 | 5 P01039,P10758,Q4G075,Q6AY61,Q812E4                                                                                                                                                                                            |

|      |                                              |    |                                                                       |
|------|----------------------------------------------|----|-----------------------------------------------------------------------|
| 5493 | 1,4,7,8,19, 2,3,5,6,17,<br>20,22,24 18,21,23 | 8  | O54728,P02780,P08723,P0C0A9,P22282,P36374,Q812E4,Q9QW07               |
| 5494 | 1,4,7,8,19, 2,3,5,6,17,<br>20,23,24 18,21,22 | 7  | O54728,P08723,P0C0A9,P10758,P36374,Q812E4,Q9QYP1                      |
| 5495 | 1,4,7,8,19, 2,3,5,6,17,<br>21,22,23 18,20,24 | 1  | P01039                                                                |
| 5496 | 1,4,7,8,19, 2,3,5,6,17,<br>21,22,24 18,20,23 | 5  | O54728,P02782,P16636,Q99MH3,Q9Z2L0                                    |
| 5497 | 1,4,7,8,19, 2,3,5,6,17,<br>21,23,24 18,20,22 | 2  | O54728,Q63474                                                         |
| 5498 | 1,4,7,8,19, 2,3,5,6,17,<br>22,23,24 18,20,21 | 2  | O54728,P63029                                                         |
| 5499 | 1,4,7,8,20, 2,3,5,6,17,<br>21,22,23 18,19,24 | 2  | P01039,Q812E4                                                         |
| 5500 | 1,4,7,8,20, 2,3,5,6,17,<br>21,22,24 18,19,23 | 8  | P02780,P02782,P08723,P30120,Q6AYR9,Q812E4,Q9JHB9,Q9Z2L0               |
| 5501 | 1,4,7,8,20, 2,3,5,6,17,<br>21,23,24 18,19,22 | 6  | P02782,P08723,P10758,Q6AYR9,Q812E4,Q9QYP1                             |
| 5502 | 1,4,7,8,20, 2,3,5,6,17,<br>22,23,24 18,19,21 | 4  | P10758,Q812E4,Q9QYP1,Q9WVK7                                           |
| 5503 | 1,4,7,8,21, 2,3,5,6,17,<br>22,23,24 18,19,20 | 0  |                                                                       |
| 5504 | 1,4,7,17,1 2,3,5,6,8,2<br>8,19,20,21 2,23,24 | 10 | B0LT89,O08815,P20646,P22283,P30919,P36374,Q62714,Q6P6R2,Q99MH3,Q9Z2L0 |
| 5505 | 1,4,7,17,1 2,3,5,6,8,2<br>8,19,20,22 1,23,24 | 5  | P20646,P30919,P36374,Q62714,Q9JJ50                                    |
| 5506 | 1,4,7,17,1 2,3,5,6,8,2<br>8,19,20,23 1,22,24 | 5  | P10758,P20646,P30919,Q62714,Q6AYC4                                    |
| 5507 | 1,4,7,17,1 2,3,5,6,8,2<br>8,19,20,24 1,22,23 | 6  | P30919,P36374,Q62714,Q63532,Q99MH3,Q9Z2L0                             |
| 5508 | 1,4,7,17,1 2,3,5,6,8,2<br>8,19,21,22 0,23,24 | 3  | P20646,P36376,Q99MH3                                                  |
| 5509 | 1,4,7,17,1 2,3,5,6,8,2<br>8,19,21,23 0,22,24 | 1  | P21674                                                                |
| 5510 | 1,4,7,17,1 2,3,5,6,8,2<br>8,19,21,24 0,22,23 | 3  | P36376,Q99MH3,Q9Z2L0                                                  |
| 5511 | 1,4,7,17,1 2,3,5,6,8,2<br>8,19,22,23 0,21,24 | 0  |                                                                       |
| 5512 | 1,4,7,17,1 2,3,5,6,8,2<br>8,19,22,24 0,21,23 | 2  | P36376,Q99MH3                                                         |

|      |                                              |                                                                                        |
|------|----------------------------------------------|----------------------------------------------------------------------------------------|
| 5513 | 1,4,7,17,1 2,3,5,6,8,2<br>8,19,23,24 0,21,22 | 0                                                                                      |
| 5514 | 1,4,7,17,1 2,3,5,6,8,1<br>8,20,21,22 9,23,24 | 2 Q9Z0J6,Q9Z2L0                                                                        |
| 5515 | 1,4,7,17,1 2,3,5,6,8,1<br>8,20,21,23 9,22,24 | 1 P30919                                                                               |
| 5516 | 1,4,7,17,1 2,3,5,6,8,1<br>8,20,21,24 9,22,23 | 4 P00507,Q811M5,Q99MH3,Q9Z2L0                                                          |
| 5517 | 1,4,7,17,1 2,3,5,6,8,1<br>8,20,22,23 9,21,24 | 1 P30919                                                                               |
| 5518 | 1,4,7,17,1 2,3,5,6,8,1<br>8,20,22,24 9,21,23 | 1 Q9Z0J6                                                                               |
| 5519 | 1,4,7,17,1 2,3,5,6,8,1<br>8,20,23,24 9,21,22 | 4 P08937,P30919,Q6AYC4,Q9QYP1                                                          |
| 5520 | 1,4,7,17,1 2,3,5,6,8,1<br>8,21,22,23 9,20,24 | 0                                                                                      |
| 5521 | 1,4,7,17,1 2,3,5,6,8,1<br>8,21,22,24 9,20,23 | 5 P36376,Q8CJD3,Q99MH3,Q9Z1F2,Q9Z2L0                                                   |
| 5522 | 1,4,7,17,1 2,3,5,6,8,1<br>8,21,23,24 9,20,22 | 1 Q64268                                                                               |
| 5523 | 1,4,7,17,1 2,3,5,6,8,1<br>8,22,23,24 9,20,21 | 3 P08937,Q5I0J9,Q64268                                                                 |
| 5524 | 1,4,7,17,1 2,3,5,6,8,1<br>9,20,21,22 8,23,24 | 5 P20646,P36374,Q99MH3,Q9JJ50,Q9Z2L0                                                   |
| 5525 | 1,4,7,17,1 2,3,5,6,8,1<br>9,20,21,23 8,22,24 | 6 P10758,P20646,P21674,P36374,Q6P6R2,Q9Z2L0                                            |
| 5526 | 1,4,7,17,1 2,3,5,6,8,1<br>9,20,21,24 8,22,23 | 12 O08815,O35547,P02781,P08723,P16636,P20646,P22283,P24368,P36374,P60905,Q99MH3,Q9Z2L0 |
| 5527 | 1,4,7,17,1 2,3,5,6,8,1<br>9,20,22,23 8,21,24 | 3 P02625,P10758,Q9JJ50                                                                 |
| 5528 | 1,4,7,17,1 2,3,5,6,8,1<br>9,20,22,24 8,21,23 | 4 P36374,Q99MH3,Q9JJ50,Q9Z2L0                                                          |
| 5529 | 1,4,7,17,1 2,3,5,6,8,1<br>9,20,23,24 8,21,22 | 3 P10758,P36374,Q9QYP1                                                                 |
| 5530 | 1,4,7,17,1 2,3,5,6,8,1<br>9,21,22,23 8,20,24 | 1 Q9R168                                                                               |
| 5531 | 1,4,7,17,1 2,3,5,6,8,1<br>9,21,22,24 8,20,23 | 6 P16636,P17559,P36376,Q99MH3,Q9R168,Q9Z2L0                                            |
| 5532 | 1,4,7,17,1 2,3,5,6,8,1<br>9,21,23,24 8,20,22 | 3 Q63474,Q9R168,Q9Z2L0                                                                 |

|      |                                              |                                                                  |
|------|----------------------------------------------|------------------------------------------------------------------|
| 5533 | 1,4,7,17,1 2,3,5,6,8,1<br>9,22,23,24 8,20,21 | 4 P25809,P70549,Q00715,Q9R168                                    |
| 5534 | 1,4,7,17,2 2,3,5,6,8,1<br>0,21,22,23 8,19,24 | 0                                                                |
| 5535 | 1,4,7,17,2 2,3,5,6,8,1<br>0,21,22,24 8,19,23 | 2 Q99MH3,Q9Z2L0                                                  |
| 5536 | 1,4,7,17,2 2,3,5,6,8,1<br>0,21,23,24 8,19,22 | 2 Q9QYP1,Q9Z2L0                                                  |
| 5537 | 1,4,7,17,2 2,3,5,6,8,1<br>0,22,23,24 8,19,21 | 3 P08937,Q00715,Q9QYP1                                           |
| 5538 | 1,4,7,17,2 2,3,5,6,8,1<br>1,22,23,24 8,19,20 | 1 Q9R168                                                         |
| 5539 | 1,4,7,18,1 2,3,5,6,8,1<br>9,20,21,22 7,23,24 | 4 P01039,P36376,P97840,Q5PQL7                                    |
| 5540 | 1,4,7,18,1 2,3,5,6,8,1<br>9,20,21,23 7,22,24 | 3 P01039,P10758,P23593                                           |
| 5541 | 1,4,7,18,1 2,3,5,6,8,1<br>9,20,21,24 7,22,23 | 9 O08815,O35547,P08723,P22283,P36374,P36376,Q63617,Q99MH3,Q9Z2L0 |
| 5542 | 1,4,7,18,1 2,3,5,6,8,1<br>9,20,22,23 7,21,24 | 3 P01039,P10758,Q6AY61                                           |
| 5543 | 1,4,7,18,1 2,3,5,6,8,1<br>9,20,22,24 7,21,23 | 1 P36376                                                         |
| 5544 | 1,4,7,18,1 2,3,5,6,8,1<br>9,20,23,24 7,21,22 | 3 P10758,Q6AYC4,Q9QYP1                                           |
| 5545 | 1,4,7,18,1 2,3,5,6,8,1<br>9,21,22,23 7,20,24 | 1 P01039                                                         |
| 5546 | 1,4,7,18,1 2,3,5,6,8,1<br>9,21,22,24 7,20,23 | 4 P17559,P36376,P63029,Q99MH3                                    |
| 5547 | 1,4,7,18,1 2,3,5,6,8,1<br>9,21,23,24 7,20,22 | 3 O89117,P36376,P63029                                           |
| 5548 | 1,4,7,18,1 2,3,5,6,8,1<br>9,22,23,24 7,20,21 | 8 D4A5U3,P13676,P17559,P25809,P36375,P63029,Q5I0J9,Q64268        |
| 5549 | 1,4,7,18,2 2,3,5,6,8,1<br>0,21,22,23 7,19,24 | 1 P01039                                                         |
| 5550 | 1,4,7,18,2 2,3,5,6,8,1<br>0,21,22,24 7,19,23 | 2 P36376,Q8CJD3                                                  |
| 5551 | 1,4,7,18,2 2,3,5,6,8,1<br>0,21,23,24 7,19,22 | 1 Q9QYP1                                                         |
| 5552 | 1,4,7,18,2 2,3,5,6,8,1<br>0,22,23,24 7,19,21 | 4 P22006,Q64268,Q9QYP1,Q9WVK7                                    |

|      |                                              |    |                                                                              |
|------|----------------------------------------------|----|------------------------------------------------------------------------------|
| 5553 | 1,4,7,18,2 2,3,5,6,8,1<br>1,22,23,24 7,19,20 | 4  | O89117,P13676,P36376,Q64268                                                  |
| 5554 | 1,4,7,19,2 2,3,5,6,8,1<br>0,21,22,23 7,18,24 | 2  | P01039,P10758                                                                |
| 5555 | 1,4,7,19,2 2,3,5,6,8,1<br>0,21,22,24 7,18,23 | 8  | O35547,O70594,P08723,P16636,P36374,P36376,Q99MH3,Q9Z2L0                      |
| 5556 | 1,4,7,19,2 2,3,5,6,8,1<br>0,21,23,24 7,18,22 | 5  | O35547,P10758,P36374,Q9QYP1,Q9Z2L0                                           |
| 5557 | 1,4,7,19,2 2,3,5,6,8,1<br>0,22,23,24 7,18,21 | 3  | P10758,Q00715,Q9QYP1                                                         |
| 5558 | 1,4,7,19,2 2,3,5,6,8,1<br>1,22,23,24 7,18,20 | 3  | P17559,P25809,Q9R168                                                         |
| 5559 | 1,4,7,20,2 2,3,5,6,8,1<br>1,22,23,24 7,18,19 | 1  | Q9QYP1                                                                       |
| 5560 | 1,4,8,17,1 2,3,5,6,7,2<br>8,19,20,21 2,23,24 | 11 | B0LT89,O08815,P04905,P24368,P30120,P36374,P47727,Q62714,Q6P6R2,Q9QX74,Q9Z2L0 |
| 5561 | 1,4,8,17,1 2,3,5,6,7,2<br>8,19,20,22 1,23,24 | 7  | B0LT89,P36374,P36860,P47727,Q62714,Q6AY61,Q9JJ50                             |
| 5562 | 1,4,8,17,1 2,3,5,6,7,2<br>8,19,20,23 1,22,24 | 5  | B0LT89,P10758,P30919,P36374,Q62714                                           |
| 5563 | 1,4,8,17,1 2,3,5,6,7,2<br>8,19,20,24 1,22,23 | 8  | B0LT89,O54728,P08723,P36374,P47727,P60905,Q62714,Q9Z2L0                      |
| 5564 | 1,4,8,17,1 2,3,5,6,7,2<br>8,19,21,22 0,23,24 | 0  |                                                                              |
| 5565 | 1,4,8,17,1 2,3,5,6,7,2<br>8,19,21,23 0,22,24 | 1  | P21674                                                                       |
| 5566 | 1,4,8,17,1 2,3,5,6,7,2<br>8,19,21,24 0,22,23 | 3  | O54728,Q99MH3,Q9Z2L0                                                         |
| 5567 | 1,4,8,17,1 2,3,5,6,7,2<br>8,19,22,23 0,21,24 | 2  | P01835,Q6AY61                                                                |
| 5568 | 1,4,8,17,1 2,3,5,6,7,2<br>8,19,22,24 0,21,23 | 3  | O54728,P01835,P50116                                                         |
| 5569 | 1,4,8,17,1 2,3,5,6,7,2<br>8,19,23,24 0,21,22 | 3  | O54728,P01835,P47967                                                         |
| 5570 | 1,4,8,17,1 2,3,5,6,7,1<br>8,20,21,22 9,23,24 | 0  |                                                                              |
| 5571 | 1,4,8,17,1 2,3,5,6,7,1<br>8,20,21,23 9,22,24 | 0  |                                                                              |
| 5572 | 1,4,8,17,1 2,3,5,6,7,1<br>8,20,21,24 9,22,23 | 4  | P30120,P47727,Q811M5,Q9Z2L0                                                  |

|      |                                              |                                                                                                                                  |
|------|----------------------------------------------|----------------------------------------------------------------------------------------------------------------------------------|
| 5573 | 1,4,8,17,1 2,3,5,6,7,1<br>8,20,22,23 9,21,24 | 1 Q6AY61                                                                                                                         |
| 5574 | 1,4,8,17,1 2,3,5,6,7,1<br>8,20,22,24 9,21,23 | 0                                                                                                                                |
| 5575 | 1,4,8,17,1 2,3,5,6,7,1<br>8,20,23,24 9,21,22 | 1 Q9QYP1                                                                                                                         |
| 5576 | 1,4,8,17,1 2,3,5,6,7,1<br>8,21,22,23 9,20,24 | 1 Q6AY61                                                                                                                         |
| 5577 | 1,4,8,17,1 2,3,5,6,7,1<br>8,21,22,24 9,20,23 | 1 Q9Z2L0                                                                                                                         |
| 5578 | 1,4,8,17,1 2,3,5,6,7,1<br>8,21,23,24 9,20,22 | 0                                                                                                                                |
| 5579 | 1,4,8,17,1 2,3,5,6,7,1<br>8,22,23,24 9,20,21 | 3 P47967,P50116,Q5I0D1                                                                                                           |
| 5580 | 1,4,8,17,1 2,3,5,6,7,1<br>9,20,21,22 8,23,24 | 7 B0LT89,P20766,P30120,P36374,Q6P6R2,Q9JJ50,Q9Z2L0                                                                               |
| 5581 | 1,4,8,17,1 2,3,5,6,7,1<br>9,20,21,23 8,22,24 | 7 B0LT89,P10758,P20766,P21674,P36374,Q6P6R2,Q9Z2L0                                                                               |
| 5582 | 1,4,8,17,1 2,3,5,6,7,1<br>9,20,21,24 8,22,23 | 18 B0LT89,O08815,O35547,O54728,P02781,P02782,P04905,P08723,P16636,P24368,P30120,P36374,P47727,P60905,Q6P6R2,Q812E4,Q99MH3,Q9Z2L0 |
| 5583 | 1,4,8,17,1 2,3,5,6,7,1<br>9,20,22,23 8,21,24 | 5 O89117,P10758,P20766,Q6AY61,Q9JJ50                                                                                             |
| 5584 | 1,4,8,17,1 2,3,5,6,7,1<br>9,20,22,24 8,21,23 | 7 O54728,O89117,P20766,P36374,P60905,Q9JJ50,Q9Z2L0                                                                               |
| 5585 | 1,4,8,17,1 2,3,5,6,7,1<br>9,20,23,24 8,21,22 | 5 O54728,P10758,P36374,P60905,Q9QYP1                                                                                             |
| 5586 | 1,4,8,17,1 2,3,5,6,7,1<br>9,21,22,23 8,20,24 | 1 P20766                                                                                                                         |
| 5587 | 1,4,8,17,1 2,3,5,6,7,1<br>9,21,22,24 8,20,23 | 5 O54728,P16636,P20766,Q99MH3,Q9Z2L0                                                                                             |
| 5588 | 1,4,8,17,1 2,3,5,6,7,1<br>9,21,23,24 8,20,22 | 3 O54728,Q63474,Q9Z2L0                                                                                                           |
| 5589 | 1,4,8,17,1 2,3,5,6,7,1<br>9,22,23,24 8,20,21 | 5 O54728,P00507,P47967,P70549,Q00715                                                                                             |
| 5590 | 1,4,8,17,2 2,3,5,6,7,1<br>0,21,22,23 8,19,24 | 1 P20766                                                                                                                         |
| 5591 | 1,4,8,17,2 2,3,5,6,7,1<br>0,21,22,24 8,19,23 | 5 P20766,P30120,Q6AYR9,Q9JJ50,Q9Z2L0                                                                                             |
| 5592 | 1,4,8,17,2 2,3,5,6,7,1<br>0,21,23,24 8,19,22 | 4 P20766,Q6AYR9,Q9QYP1,Q9Z2L0                                                                                                    |

|      |                                              |    |                                                                                                   |
|------|----------------------------------------------|----|---------------------------------------------------------------------------------------------------|
| 5593 | 1,4,8,17,2 2,3,5,6,7,1<br>0,22,23,24 8,19,21 | 4  | P20766,P47967,Q00715,Q9QYP1                                                                       |
| 5594 | 1,4,8,17,2 2,3,5,6,7,1<br>1,22,23,24 8,19,20 | 2  | P20766,P47967                                                                                     |
| 5595 | 1,4,8,18,1 2,3,5,6,7,1<br>9,20,21,22 7,23,24 | 4  | BOLT89,P01039,P36374,Q6AY61                                                                       |
| 5596 | 1,4,8,18,1 2,3,5,6,7,1<br>9,20,21,23 7,22,24 | 3  | P01039,P10758,P36374                                                                              |
| 5597 | 1,4,8,18,1 2,3,5,6,7,1<br>9,20,21,24 7,22,23 | 14 | BOLT89,O08815,O35547,O54728,P02782,P04905,P08723,P30120,P36374,P47727,P60905,Q812E4,Q99MH3,Q9Z2L0 |
| 5598 | 1,4,8,18,1 2,3,5,6,7,1<br>9,20,22,23 7,21,24 | 6  | P01039,P04762,P10758,P36860,P50116,Q6AY61                                                         |
| 5599 | 1,4,8,18,1 2,3,5,6,7,1<br>9,20,22,24 7,21,23 | 4  | O54728,P36374,P50116,Q6AY61                                                                       |
| 5600 | 1,4,8,18,1 2,3,5,6,7,1<br>9,20,23,24 7,21,22 | 4  | O54728,P10758,P50116,Q9R168                                                                       |
| 5601 | 1,4,8,18,1 2,3,5,6,7,1<br>9,21,22,23 7,20,24 | 3  | P01039,P50116,Q6AY61                                                                              |
| 5602 | 1,4,8,18,1 2,3,5,6,7,1<br>9,21,22,24 7,20,23 | 2  | O54728,P50116                                                                                     |
| 5603 | 1,4,8,18,1 2,3,5,6,7,1<br>9,21,23,24 7,20,22 | 2  | O54728,P50116                                                                                     |
| 5604 | 1,4,8,18,1 2,3,5,6,7,1<br>9,22,23,24 7,20,21 | 5  | O54728,P00507,P50116,P63029,Q6AY61                                                                |
| 5605 | 1,4,8,18,2 2,3,5,6,7,1<br>0,21,22,23 7,19,24 | 3  | P01039,P54921,Q6AY61                                                                              |
| 5606 | 1,4,8,18,2 2,3,5,6,7,1<br>0,21,22,24 7,19,23 | 1  | P50116                                                                                            |
| 5607 | 1,4,8,18,2 2,3,5,6,7,1<br>0,21,23,24 7,19,22 | 1  | Q9QYP1                                                                                            |
| 5608 | 1,4,8,18,2 2,3,5,6,7,1<br>0,22,23,24 7,19,21 | 4  | P50116,Q5QE79,Q6AY61,Q9WVK7                                                                       |
| 5609 | 1,4,8,18,2 2,3,5,6,7,1<br>1,22,23,24 7,19,20 | 2  | P50116,P55281                                                                                     |
| 5610 | 1,4,8,19,2 2,3,5,6,7,1<br>0,21,22,23 7,18,24 | 4  | P01039,P10758,P20766,Q6AY61                                                                       |
| 5611 | 1,4,8,19,2 2,3,5,6,7,1<br>0,21,22,24 7,18,23 | 13 | O35547,O54728,O70594,P02782,P08723,P16636,P20766,P30120,P36374,P60905,Q812E4,Q99MH3,Q9Z2L0        |
| 5612 | 1,4,8,19,2 2,3,5,6,7,1<br>0,21,23,24 7,18,22 | 8  | O35547,O54728,P08723,P10758,P30120,P36374,P60905,Q812E4                                           |

|      |                               |                        |    |                                                                                            |
|------|-------------------------------|------------------------|----|--------------------------------------------------------------------------------------------|
| 5613 | 1,4,8,19,2<br>0,22,23,24      | 2,3,5,6,7,1<br>7,18,21 | 5  | O54728,P10758,P50116,Q00715,Q6AY61                                                         |
| 5614 | 1,4,8,19,2<br>1,22,23,24      | 2,3,5,6,7,1<br>7,18,20 | 3  | O54728,P50116,P55281                                                                       |
| 5615 | 1,4,8,20,2<br>1,22,23,24      | 2,3,5,6,7,1<br>7,18,19 | 2  | P20766,P50116                                                                              |
| 5616 | 1,4,17,18,<br>19,20,21,2<br>2 | 2,3,5,6,7,8<br>,23,24  | 7  | BOLT89,O70594,P50115,Q62714,Q6P6R2,Q9JJ50,Q9Z2L0                                           |
| 5617 | 1,4,17,18,<br>19,20,21,2<br>3 | 2,3,5,6,7,8<br>,22,24  | 8  | BOLT89,O54858,P23593,P30919,P35280,P50115,Q62714,Q6P6R2                                    |
| 5618 | 1,4,17,18,<br>19,20,21,2<br>4 | 2,3,5,6,7,8<br>,22,23  | 13 | BOLT89,O08815,O54858,P23593,P35280,P36374,P50115,P60905,P80202,Q62714,Q63532,Q99MH3,Q9Z2L0 |
| 5619 | 1,4,17,18,<br>19,20,22,2<br>3 | 2,3,5,6,7,8<br>,21,24  | 8  | P04762,P30919,P36860,P50115,P50116,Q00715,Q62714,Q6AY61                                    |
| 5620 | 1,4,17,18,<br>19,20,22,2<br>4 | 2,3,5,6,7,8<br>,21,23  | 6  | O70594,P50115,P50116,Q62714,Q9JJ50,Q9Z2L0                                                  |
| 5621 | 1,4,17,18,<br>19,20,23,2<br>4 | 2,3,5,6,7,8<br>,21,22  | 9  | P08937,P10758,P11883,P35280,P50115,P50116,Q62714,Q6AYC4,Q9QYP1                             |
| 5622 | 1,4,17,18,<br>19,21,22,2<br>3 | 2,3,5,6,7,8<br>,20,24  | 2  | P50115,P50116                                                                              |
| 5623 | 1,4,17,18,<br>19,21,22,2<br>4 | 2,3,5,6,7,8<br>,20,23  | 8  | P17559,P25031,P36376,P50115,P50116,Q4G075,Q99MH3,Q9Z2L0                                    |
| 5624 | 1,4,17,18,<br>19,21,23,2<br>4 | 2,3,5,6,7,8<br>,20,22  | 4  | P35280,P50115,P50116,Q4G075                                                                |
| 5625 | 1,4,17,18,<br>19,22,23,2<br>4 | 2,3,5,6,7,8<br>,20,21  | 9  | D4A5U3,P02631,P06760,P08937,P47967,P50115,P50116,P70549,Q00715                             |
| 5626 | 1,4,17,18,<br>20,21,22,2<br>3 | 2,3,5,6,7,8<br>,19,24  | 2  | P50115,P50116                                                                              |



|      |                               |                       |    |                                                                              |
|------|-------------------------------|-----------------------|----|------------------------------------------------------------------------------|
| 5627 | 1,4,17,18,<br>20,21,22,2<br>4 | 2,3,5,6,7,8<br>,19,23 | 6  | O70594,P42854,P50115,P50116,Q8CJD3,Q9Z2L0                                    |
| 5628 | 1,4,17,18,<br>20,21,23,2<br>4 | 2,3,5,6,7,8<br>,19,22 | 5  | P35280,P50115,P50116,Q9QYP1,Q9Z2L0                                           |
| 5629 | 1,4,17,18,<br>20,22,23,2<br>4 | 2,3,5,6,7,8<br>,19,21 | 7  | P08937,P11883,P47967,P50115,P50116,Q00715,Q9QYP1                             |
| 5630 | 1,4,17,18,<br>21,22,23,2<br>4 | 2,3,5,6,7,8<br>,19,20 | 5  | P47967,P50115,P50116,Q4G075,Q5I0D1                                           |
| 5631 | 1,4,17,19,<br>20,21,22,2<br>3 | 2,3,5,6,7,8<br>,18,24 | 2  | P20766,P50115                                                                |
| 5632 | 1,4,17,19,<br>20,21,22,2<br>4 | 2,3,5,6,7,8<br>,18,23 | 11 | B0LT89,O70594,P16636,P20766,P36374,P50115,P50116,P80202,Q99MH3,Q9JJ50,Q9Z2L0 |
| 5633 | 1,4,17,19,<br>20,21,23,2<br>4 | 2,3,5,6,7,8<br>,18,22 | 7  | P20766,P23593,P35280,P36374,P50115,Q9QYP1,Q9Z2L0                             |
| 5634 | 1,4,17,19,<br>20,22,23,2<br>4 | 2,3,5,6,7,8<br>,18,21 | 10 | O70594,P02625,P02631,P08937,P20766,P50115,P50116,Q00715,Q9JJ50,Q9QYP1        |
| 5635 | 1,4,17,19,<br>21,22,23,2<br>4 | 2,3,5,6,7,8<br>,18,20 | 6  | P12020,P20766,P47967,P50115,P50116,Q9R168                                    |
| 5636 | 1,4,17,20,<br>21,22,23,2<br>4 | 2,3,5,6,7,8<br>,18,19 | 6  | O70594,P20766,P50115,P50116,Q9QYP1,Q9Z2L0                                    |
| 5637 | 1,4,18,19,<br>20,21,22,2<br>3 | 2,3,5,6,7,8<br>,17,24 | 5  | O70594,P01039,P50115,P50116,Q6AY61                                           |
| 5638 | 1,4,18,19,<br>20,21,22,2<br>4 | 2,3,5,6,7,8<br>,17,23 | 6  | O70594,P36376,P50115,P50116,Q99MH3,Q9Z2L0                                    |
| 5639 | 1,4,18,19,<br>20,21,23,2<br>4 | 2,3,5,6,7,8<br>,17,22 | 7  | O70594,P10758,P23593,P35280,P50115,P50116,Q9QYP1                             |

|      |                               |                          |    |                                                                                     |
|------|-------------------------------|--------------------------|----|-------------------------------------------------------------------------------------|
| 5640 | 1,4,18,19,<br>20,22,23,2<br>4 | 2,3,5,6,7,8<br>,17,21    | 9  | O70594,P02631,P04762,P10758,P22006,P50115,P50116,Q00715,Q6AY61                      |
| 5641 | 1,4,18,19,<br>21,22,23,2<br>4 | 2,3,5,6,7,8<br>,17,20    | 7  | D4A5U3,P13676,P17559,P50115,P50116,P55281,Q4G075                                    |
| 5642 | 1,4,18,20,<br>21,22,23,2<br>4 | 2,3,5,6,7,8<br>,17,19    | 4  | O70594,P50115,P50116,Q9QYP1                                                         |
| 5643 | 1,4,19,20,<br>21,22,23,2<br>4 | 2,3,5,6,7,8<br>,17,18    | 6  | O70594,P20766,P50115,P50116,Q99PP0,Q9QZQ5                                           |
| 5644 | 1,5,6,7,8,1<br>7,18,19        | 2,3,4,20,2<br>1,22,23,24 | 3  | P00762,P13432,Q9QX74                                                                |
| 5645 | 1,5,6,7,8,1<br>7,18,20        | 2,3,4,19,2<br>1,22,23,24 | 7  | P06911,P12020,P13432,P31044,P35745,Q5GRG2,Q64335                                    |
| 5646 | 1,5,6,7,8,1<br>7,18,21        | 2,3,4,19,2<br>0,22,23,24 | 6  | P05539,P06760,P13432,P35745,P36860,Q9QX74                                           |
| 5647 | 1,5,6,7,8,1<br>7,18,22        | 2,3,4,19,2<br>0,21,23,24 | 4  | P13432,P35745,P49134,Q64335                                                         |
| 5648 | 1,5,6,7,8,1<br>7,18,23        | 2,3,4,19,2<br>0,21,22,24 | 4  | O70594,P13432,P35745,Q64335                                                         |
| 5649 | 1,5,6,7,8,1<br>7,18,24        | 2,3,4,19,2<br>0,21,22,23 | 3  | P13432,P35745,P49134                                                                |
| 5650 | 1,5,6,7,8,1<br>7,19,20        | 2,3,4,18,2<br>1,22,23,24 | 8  | P06911,P13432,P13676,P31044,P36374,Q5GRG2,Q9QX74,Q9WTT6                             |
| 5651 | 1,5,6,7,8,1<br>7,19,21        | 2,3,4,18,2<br>0,22,23,24 | 8  | iRT-Kit_WR_fusion,P05539,P06760,P21674,Q63474,Q63493,Q66H69,Q9QX74                  |
| 5652 | 1,5,6,7,8,1<br>7,19,22        | 2,3,4,18,2<br>0,21,23,24 | 0  |                                                                                     |
| 5653 | 1,5,6,7,8,1<br>7,19,23        | 2,3,4,18,2<br>0,21,22,24 | 3  | P21674,P50115,Q8CJD3                                                                |
| 5654 | 1,5,6,7,8,1<br>7,19,24        | 2,3,4,18,2<br>0,21,22,23 | 0  |                                                                                     |
| 5655 | 1,5,6,7,8,1<br>7,20,21        | 2,3,4,18,1<br>9,22,23,24 | 12 | P05539,P06760,P06911,P13432,P19629,P22283,P35745,Q5GRG2,Q63493,Q9JHB9,Q9QX74,Q9WTT6 |
| 5656 | 1,5,6,7,8,1<br>7,20,22        | 2,3,4,18,1<br>9,21,23,24 | 6  | P06911,P13432,P35745,Q4G075,Q5GRG2,Q9Z0J6                                           |
| 5657 | 1,5,6,7,8,1<br>7,20,23        | 2,3,4,18,1<br>9,21,22,24 | 7  | P06911,P13432,P19132,P23739,P25031,P35745,Q5GRG2                                    |

|      |                        |                          |   |                                                                |
|------|------------------------|--------------------------|---|----------------------------------------------------------------|
| 5658 | 1,5,6,7,8,1<br>7,20,24 | 2,3,4,18,1<br>9,21,22,23 | 6 | P06911,P09456,P13432,P35745,Q5GRG2,Q9JHB9                      |
| 5659 | 1,5,6,7,8,1<br>7,21,22 | 2,3,4,18,1<br>9,20,23,24 | 3 | P05539,P35745,Q9QX74                                           |
| 5660 | 1,5,6,7,8,1<br>7,21,23 | 2,3,4,18,1<br>9,20,22,24 | 5 | P21674,P35745,P36860,Q63474,Q9QX74                             |
| 5661 | 1,5,6,7,8,1<br>7,21,24 | 2,3,4,18,1<br>9,20,22,23 | 4 | P05539,P35745,P36860,Q63474                                    |
| 5662 | 1,5,6,7,8,1<br>7,22,23 | 2,3,4,18,1<br>9,20,21,24 | 1 | P35745                                                         |
| 5663 | 1,5,6,7,8,1<br>7,22,24 | 2,3,4,18,1<br>9,20,21,23 | 1 | P35745                                                         |
| 5664 | 1,5,6,7,8,1<br>7,23,24 | 2,3,4,18,1<br>9,20,21,22 | 1 | P35745                                                         |
| 5665 | 1,5,6,7,8,1<br>8,19,20 | 2,3,4,17,2<br>1,22,23,24 | 8 | P06761,P06911,P13432,P22283,P31044,Q5GRG2,Q5I0D1,Q9QW07        |
| 5666 | 1,5,6,7,8,1<br>8,19,21 | 2,3,4,17,2<br>0,22,23,24 | 1 | P06760                                                         |
| 5667 | 1,5,6,7,8,1<br>8,19,22 | 2,3,4,17,2<br>0,21,23,24 | 0 |                                                                |
| 5668 | 1,5,6,7,8,1<br>8,19,23 | 2,3,4,17,2<br>0,21,22,24 | 0 |                                                                |
| 5669 | 1,5,6,7,8,1<br>8,19,24 | 2,3,4,17,2<br>0,21,22,23 | 0 |                                                                |
| 5670 | 1,5,6,7,8,1<br>8,20,21 | 2,3,4,17,1<br>9,22,23,24 | 9 | P06760,P06761,P06911,P19629,P22283,P35745,P47967,Q9JHB9,Q9QW07 |
| 5671 | 1,5,6,7,8,1<br>8,20,22 | 2,3,4,17,1<br>9,21,23,24 | 4 | P06911,P12020,P35745,Q9WVK7                                    |
| 5672 | 1,5,6,7,8,1<br>8,20,23 | 2,3,4,17,1<br>9,21,22,24 | 4 | P06911,P19629,P35745,Q9WVK7                                    |
| 5673 | 1,5,6,7,8,1<br>8,20,24 | 2,3,4,17,1<br>9,21,22,23 | 6 | P06911,P13432,Q5GRG2,Q9JHB9,Q9QW07,Q9WVK7                      |
| 5674 | 1,5,6,7,8,1<br>8,21,22 | 2,3,4,17,1<br>9,20,23,24 | 2 | P35745,P49134                                                  |
| 5675 | 1,5,6,7,8,1<br>8,21,23 | 2,3,4,17,1<br>9,20,22,24 | 1 | P35745                                                         |
| 5676 | 1,5,6,7,8,1<br>8,21,24 | 2,3,4,17,1<br>9,20,22,23 | 2 | P36860,P49134                                                  |
| 5677 | 1,5,6,7,8,1<br>8,22,23 | 2,3,4,17,1<br>9,20,21,24 | 2 | P49134,Q9WVK7                                                  |

|      |                        |                          |    |                                                                                                                                                                |
|------|------------------------|--------------------------|----|----------------------------------------------------------------------------------------------------------------------------------------------------------------|
| 5678 | 1,5,6,7,8,1<br>8,22,24 | 2,3,4,17,1<br>9,20,21,23 | 2  | P49134,Q9WVK7                                                                                                                                                  |
| 5679 | 1,5,6,7,8,1<br>8,23,24 | 2,3,4,17,1<br>9,20,21,22 | 2  | P49134,Q9WVK7                                                                                                                                                  |
| 5680 | 1,5,6,7,8,1<br>9,20,21 | 2,3,4,17,1<br>8,22,23,24 | 20 | iRT-<br>Kit_WR_fusion,P02780,P04905,P06760,P06761,P09456,P19218,P19629,P22282,P22283,P46462,<br>P47967,P55159,Q5I0D1,Q63493,Q63617,Q812E4,Q9JI85,Q9QW07,Q9WTT6 |
| 5681 | 1,5,6,7,8,1<br>9,20,22 | 2,3,4,17,1<br>8,21,23,24 | 3  | P19218,Q99041,Q9QW07                                                                                                                                           |
| 5682 | 1,5,6,7,8,1<br>9,20,23 | 2,3,4,17,1<br>8,21,22,24 | 7  | P19218,P19629,P23739,P25031,Q812E4,Q8CJD3,Q9QW07                                                                                                               |
| 5683 | 1,5,6,7,8,1<br>9,20,24 | 2,3,4,17,1<br>8,21,22,23 | 6  | P08723,P09456,P22283,Q812E4,Q9JHB9,Q9QW07                                                                                                                      |
| 5684 | 1,5,6,7,8,1<br>9,21,22 | 2,3,4,17,1<br>8,20,23,24 | 4  | iRT-Kit_WR_fusion,P19218,Q99041,Q9QYP1                                                                                                                         |
| 5685 | 1,5,6,7,8,1<br>9,21,23 | 2,3,4,17,1<br>8,20,22,24 | 3  | iRT-Kit_WR_fusion,P21674,Q63474                                                                                                                                |
| 5686 | 1,5,6,7,8,1<br>9,21,24 | 2,3,4,17,1<br>8,20,22,23 | 2  | iRT-Kit_WR_fusion,Q63474                                                                                                                                       |
| 5687 | 1,5,6,7,8,1<br>9,22,23 | 2,3,4,17,1<br>8,20,21,24 | 2  | P19218,P19223                                                                                                                                                  |
| 5688 | 1,5,6,7,8,1<br>9,22,24 | 2,3,4,17,1<br>8,20,21,23 | 2  | P19218,P19223                                                                                                                                                  |
| 5689 | 1,5,6,7,8,1<br>9,23,24 | 2,3,4,17,1<br>8,20,21,22 | 1  | P19223                                                                                                                                                         |
| 5690 | 1,5,6,7,8,2<br>0,21,22 | 2,3,4,17,1<br>8,19,23,24 | 5  | P06760,P19218,P19629,P35745,Q5PQL7                                                                                                                             |
| 5691 | 1,5,6,7,8,2<br>0,21,23 | 2,3,4,17,1<br>8,19,22,24 | 7  | P06760,P19132,P19629,P23739,P25031,P35745,Q812E4                                                                                                               |
| 5692 | 1,5,6,7,8,2<br>0,21,24 | 2,3,4,17,1<br>8,19,22,23 | 10 | P02782,P08723,P09456,P19629,P22283,P35745,Q63474,Q812E4,Q9JHB9,Q9QW07                                                                                          |
| 5693 | 1,5,6,7,8,2<br>0,22,23 | 2,3,4,17,1<br>8,19,21,24 | 5  | P19218,P19629,P23739,P35745,Q9WVK7                                                                                                                             |
| 5694 | 1,5,6,7,8,2<br>0,22,24 | 2,3,4,17,1<br>8,19,21,23 | 5  | P19218,P35745,Q9JHB9,Q9QW07,Q9WVK7                                                                                                                             |
| 5695 | 1,5,6,7,8,2<br>0,23,24 | 2,3,4,17,1<br>8,19,21,22 | 5  | P23739,P35745,Q812E4,Q9QW07,Q9WVK7                                                                                                                             |
| 5696 | 1,5,6,7,8,2<br>1,22,23 | 2,3,4,17,1<br>8,19,20,24 | 3  | P19218,P35745,Q62714                                                                                                                                           |
| 5697 | 1,5,6,7,8,2<br>1,22,24 | 2,3,4,17,1<br>8,19,20,23 | 3  | P35745,P36860,Q62714                                                                                                                                           |

|      |                         |                          |   |                                                                |
|------|-------------------------|--------------------------|---|----------------------------------------------------------------|
| 5698 | 1,5,6,7,8,2<br>1,23,24  | 2,3,4,17,1<br>8,19,20,22 | 5 | P35745,P36860,Q62714,Q63474,Q8K1G0                             |
| 5699 | 1,5,6,7,8,2<br>2,23,24  | 2,3,4,17,1<br>8,19,20,21 | 9 | O54858,P19223,P25809,P29315,P35745,P49134,Q62714,Q6P6R2,Q9WVK7 |
| 5700 | 1,5,6,7,17,<br>18,19,20 | 2,3,4,8,21,<br>22,23,24  | 3 | P00762,P20761,P30919                                           |
| 5701 | 1,5,6,7,17,<br>18,19,21 | 2,3,4,8,20,<br>22,23,24  | 2 | P00762,P05539                                                  |
| 5702 | 1,5,6,7,17,<br>18,19,22 | 2,3,4,8,20,<br>21,23,24  | 1 | P00762                                                         |
| 5703 | 1,5,6,7,17,<br>18,19,23 | 2,3,4,8,20,<br>21,22,24  | 2 | P00762,Q10743                                                  |
| 5704 | 1,5,6,7,17,<br>18,19,24 | 2,3,4,8,20,<br>21,22,23  | 1 | P00762                                                         |
| 5705 | 1,5,6,7,17,<br>18,20,21 | 2,3,4,8,19,<br>22,23,24  | 2 | P00507,P05539                                                  |
| 5706 | 1,5,6,7,17,<br>18,20,22 | 2,3,4,8,19,<br>21,23,24  | 2 | P00762,Q9Z0J6                                                  |
| 5707 | 1,5,6,7,17,<br>18,20,23 | 2,3,4,8,19,<br>21,22,24  | 2 | P00762,P30919                                                  |
| 5708 | 1,5,6,7,17,<br>18,20,24 | 2,3,4,8,19,<br>21,22,23  | 1 | P00762                                                         |
| 5709 | 1,5,6,7,17,<br>18,21,22 | 2,3,4,8,19,<br>20,23,24  | 2 | P00762,P05539                                                  |
| 5710 | 1,5,6,7,17,<br>18,21,23 | 2,3,4,8,19,<br>20,22,24  | 4 | P00762,P05539,P19814,P36860                                    |
| 5711 | 1,5,6,7,17,<br>18,21,24 | 2,3,4,8,19,<br>20,22,23  | 4 | P05539,P36376,P36860,Q6AY61                                    |
| 5712 | 1,5,6,7,17,<br>18,22,23 | 2,3,4,8,19,<br>20,21,24  | 2 | P00762,Q9EQS0                                                  |
| 5713 | 1,5,6,7,17,<br>18,22,24 | 2,3,4,8,19,<br>20,21,23  | 1 | P00762                                                         |
| 5714 | 1,5,6,7,17,<br>18,23,24 | 2,3,4,8,19,<br>20,21,22  | 1 | P00762                                                         |
| 5715 | 1,5,6,7,17,<br>19,20,21 | 2,3,4,8,18,<br>22,23,24  | 4 | B0LT89,P05539,P22283,Q63617                                    |
| 5716 | 1,5,6,7,17,<br>19,20,22 | 2,3,4,8,18,<br>21,23,24  | 3 | O89117,P00762,P02625                                           |
| 5717 | 1,5,6,7,17,<br>19,20,23 | 2,3,4,8,18,<br>21,22,24  | 3 | P00762,P02625,P23739                                           |

|      |                                              |                                                    |
|------|----------------------------------------------|----------------------------------------------------|
| 5718 | 1,5,6,7,17, 2,3,4,8,18,<br>19,20,24 21,22,23 | 2 P00762,P54921                                    |
| 5719 | 1,5,6,7,17, 2,3,4,8,18,<br>19,21,22 20,23,24 | 3 P00762,P05539,Q9R168                             |
| 5720 | 1,5,6,7,17, 2,3,4,8,18,<br>19,21,23 20,22,24 | 3 P00762,P05539,P21674                             |
| 5721 | 1,5,6,7,17, 2,3,4,8,18,<br>19,21,24 20,22,23 | 7 P00762,P05539,P36376,P54921,Q5BJY9,Q63474,Q6AY61 |
| 5722 | 1,5,6,7,17, 2,3,4,8,18,<br>19,22,23 20,21,24 | 2 P00762,P02625                                    |
| 5723 | 1,5,6,7,17, 2,3,4,8,18,<br>19,22,24 20,21,23 | 2 P00762,Q5BJY9                                    |
| 5724 | 1,5,6,7,17, 2,3,4,8,18,<br>19,23,24 20,21,22 | 2 P00762,P25809                                    |
| 5725 | 1,5,6,7,17, 2,3,4,8,18,<br>20,21,22 19,23,24 | 3 P05539,Q5PQL7,Q9Z0J6                             |
| 5726 | 1,5,6,7,17, 2,3,4,8,18,<br>20,21,23 19,22,24 | 2 P05539,P35745                                    |
| 5727 | 1,5,6,7,17, 2,3,4,8,18,<br>20,21,24 19,22,23 | 3 P05539,P36860,Q6AY61                             |
| 5728 | 1,5,6,7,17, 2,3,4,8,18,<br>20,22,23 19,21,24 | 2 P00762,P02625                                    |
| 5729 | 1,5,6,7,17, 2,3,4,8,18,<br>20,22,24 19,21,23 | 1 Q9Z0J6                                           |
| 5730 | 1,5,6,7,17, 2,3,4,8,18,<br>20,23,24 19,21,22 | 1 P23739                                           |
| 5731 | 1,5,6,7,17, 2,3,4,8,18,<br>21,22,23 19,20,24 | 3 P00762,P05539,Q9R168                             |
| 5732 | 1,5,6,7,17, 2,3,4,8,18,<br>21,22,24 19,20,23 | 5 P05539,P36376,P36860,Q5BJY9,Q9R168               |
| 5733 | 1,5,6,7,17, 2,3,4,8,18,<br>21,23,24 19,20,22 | 3 P05539,P36860,Q63474                             |
| 5734 | 1,5,6,7,17, 2,3,4,8,18,<br>22,23,24 19,20,21 | 4 D4A5U3,P00762,P25809,Q9R168                      |
| 5735 | 1,5,6,7,18, 2,3,4,8,17,<br>19,20,21 22,23,24 | 5 P22283,P47967,Q5I0D1,Q5PQL7,Q63617               |
| 5736 | 1,5,6,7,18, 2,3,4,8,17,<br>19,20,22 21,23,24 | 2 P00762,Q5PQL7                                    |
| 5737 | 1,5,6,7,18, 2,3,4,8,17,<br>19,20,23 21,22,24 | 1 P00762                                           |

|      |                                              |                                                                  |
|------|----------------------------------------------|------------------------------------------------------------------|
| 5738 | 1,5,6,7,18, 2,3,4,8,17,<br>19,20,24 21,22,23 | 1 P00762                                                         |
| 5739 | 1,5,6,7,18, 2,3,4,8,17,<br>19,21,22 20,23,24 | 3 P00762,P36376,Q5PQL7                                           |
| 5740 | 1,5,6,7,18, 2,3,4,8,17,<br>19,21,23 20,22,24 | 1 P00762                                                         |
| 5741 | 1,5,6,7,18, 2,3,4,8,17,<br>19,21,24 20,22,23 | 2 P00762,P36376                                                  |
| 5742 | 1,5,6,7,18, 2,3,4,8,17,<br>19,22,23 20,21,24 | 5 D4A5U3,P00762,P19223,Q811M5,Q9EQS0                             |
| 5743 | 1,5,6,7,18, 2,3,4,8,17,<br>19,22,24 20,21,23 | 4 D4A5U3,P00762,P19223,P36376                                    |
| 5744 | 1,5,6,7,18, 2,3,4,8,17,<br>19,23,24 20,21,22 | 5 D4A5U3,P00762,P19223,P25809,Q9WVK7                             |
| 5745 | 1,5,6,7,18, 2,3,4,8,17,<br>20,21,22 19,23,24 | 2 P01835,Q5PQL7                                                  |
| 5746 | 1,5,6,7,18, 2,3,4,8,17,<br>20,21,23 19,22,24 | 1 P01835                                                         |
| 5747 | 1,5,6,7,18, 2,3,4,8,17,<br>20,21,24 19,22,23 | 1 P01835                                                         |
| 5748 | 1,5,6,7,18, 2,3,4,8,17,<br>20,22,23 19,21,24 | 4 P00762,P04355,Q9EQS0,Q9WVK7                                    |
| 5749 | 1,5,6,7,18, 2,3,4,8,17,<br>20,22,24 19,21,23 | 2 P22006,Q9WVK7                                                  |
| 5750 | 1,5,6,7,18, 2,3,4,8,17,<br>20,23,24 19,21,22 | 1 Q9WVK7                                                         |
| 5751 | 1,5,6,7,18, 2,3,4,8,17,<br>21,22,23 19,20,24 | 3 D4A5U3,P00762,P01835                                           |
| 5752 | 1,5,6,7,18, 2,3,4,8,17,<br>21,22,24 19,20,23 | 3 D4A5U3,P01835,P36376                                           |
| 5753 | 1,5,6,7,18, 2,3,4,8,17,<br>21,23,24 19,20,22 | 5 D4A5U3,O89117,P01835,P36860,Q9JJ50                             |
| 5754 | 1,5,6,7,18, 2,3,4,8,17,<br>22,23,24 19,20,21 | 9 D4A5U3,P00762,P13676,P19223,P25809,P97675,Q6P6R2,Q9EQS0,Q9WVK7 |
| 5755 | 1,5,6,7,19, 2,3,4,8,17,<br>20,21,22 18,23,24 | 3 P19218,Q5PQL7,Q63617                                           |
| 5756 | 1,5,6,7,19, 2,3,4,8,17,<br>20,21,23 18,22,24 | 0                                                                |
| 5757 | 1,5,6,7,19, 2,3,4,8,17,<br>20,21,24 18,22,23 | 4 O35547,P22283,Q63617,Q9WUC4                                    |

|      |                                              |                                                    |
|------|----------------------------------------------|----------------------------------------------------|
| 5758 | 1,5,6,7,19, 2,3,4,8,17,<br>20,22,23 18,21,24 | 3 P00762,P02625,P19218                             |
| 5759 | 1,5,6,7,19, 2,3,4,8,17,<br>20,22,24 18,21,23 | 3 P00762,P19218,P22006                             |
| 5760 | 1,5,6,7,19, 2,3,4,8,17,<br>20,23,24 18,21,22 | 1 P23739                                           |
| 5761 | 1,5,6,7,19, 2,3,4,8,17,<br>21,22,23 18,20,24 | 2 P00762,P19218                                    |
| 5762 | 1,5,6,7,19, 2,3,4,8,17,<br>21,22,24 18,20,23 | 3 P00774,P36376,Q5BJY9                             |
| 5763 | 1,5,6,7,19, 2,3,4,8,17,<br>21,23,24 18,20,22 | 2 P25809,Q63474                                    |
| 5764 | 1,5,6,7,19, 2,3,4,8,17,<br>22,23,24 18,20,21 | 7 D4A5U3,P00762,P00774,P19223,P25809,P26772,Q811M5 |
| 5765 | 1,5,6,7,20, 2,3,4,8,17,<br>21,22,23 18,19,24 | 1 P01835                                           |
| 5766 | 1,5,6,7,20, 2,3,4,8,17,<br>21,22,24 18,19,23 | 1 P01835                                           |
| 5767 | 1,5,6,7,20, 2,3,4,8,17,<br>21,23,24 18,19,22 | 1 P01835                                           |
| 5768 | 1,5,6,7,20, 2,3,4,8,17,<br>22,23,24 18,19,21 | 2 P22006,Q9WVK7                                    |
| 5769 | 1,5,6,7,21, 2,3,4,8,17,<br>22,23,24 18,19,20 | 6 D4A5U3,P01835,P13676,P25809,P36860,Q62714        |
| 5770 | 1,5,6,8,17, 2,3,4,7,21,<br>18,19,20 22,23,24 | 2 B0LT89,P13432                                    |
| 5771 | 1,5,6,8,17, 2,3,4,7,20,<br>18,19,21 22,23,24 | 2 P13432,Q9QX74                                    |
| 5772 | 1,5,6,8,17, 2,3,4,7,20,<br>18,19,22 21,23,24 | 1 P13432                                           |
| 5773 | 1,5,6,8,17, 2,3,4,7,20,<br>18,19,23 21,22,24 | 1 P13432                                           |
| 5774 | 1,5,6,8,17, 2,3,4,7,20,<br>18,19,24 21,22,23 | 1 P13432                                           |
| 5775 | 1,5,6,8,17, 2,3,4,7,19,<br>18,20,21 22,23,24 | 1 P13432                                           |
| 5776 | 1,5,6,8,17, 2,3,4,7,19,<br>18,20,22 21,23,24 | 1 P13432                                           |
| 5777 | 1,5,6,8,17, 2,3,4,7,19,<br>18,20,23 21,22,24 | 2 P13432,P23739                                    |



|      |                                              |                               |
|------|----------------------------------------------|-------------------------------|
| 5778 | 1,5,6,8,17, 2,3,4,7,19,<br>18,20,24 21,22,23 | 1 P13432                      |
| 5779 | 1,5,6,8,17, 2,3,4,7,19,<br>18,21,22 20,23,24 | 2 P10758,P13432               |
| 5780 | 1,5,6,8,17, 2,3,4,7,19,<br>18,21,23 20,22,24 | 2 P13432,P19814               |
| 5781 | 1,5,6,8,17, 2,3,4,7,19,<br>18,21,24 20,22,23 | 3 P10758,P13432,P36860        |
| 5782 | 1,5,6,8,17, 2,3,4,7,19,<br>18,22,23 20,21,24 | 2 P13432,P68511               |
| 5783 | 1,5,6,8,17, 2,3,4,7,19,<br>18,22,24 20,21,23 | 2 P10758,P13432               |
| 5784 | 1,5,6,8,17, 2,3,4,7,19,<br>18,23,24 20,21,22 | 1 P13432                      |
| 5785 | 1,5,6,8,17, 2,3,4,7,18,<br>19,20,21 22,23,24 | 4 B0LT89,P06760,Q6P6R2,Q9JI85 |
| 5786 | 1,5,6,8,17, 2,3,4,7,18,<br>19,20,22 21,23,24 | 4 B0LT89,O89117,P19218,P20766 |
| 5787 | 1,5,6,8,17, 2,3,4,7,18,<br>19,20,23 21,22,24 | 3 O89117,P23739,Q8CJD3        |
| 5788 | 1,5,6,8,17, 2,3,4,7,18,<br>19,20,24 21,22,23 | 3 B0LT89,P13432,P60905        |
| 5789 | 1,5,6,8,17, 2,3,4,7,18,<br>19,21,22 20,23,24 | 3 P05539,P20766,Q9QYP1        |
| 5790 | 1,5,6,8,17, 2,3,4,7,18,<br>19,21,23 20,22,24 | 1 P21674                      |
| 5791 | 1,5,6,8,17, 2,3,4,7,18,<br>19,21,24 20,22,23 | 1 Q63474                      |
| 5792 | 1,5,6,8,17, 2,3,4,7,18,<br>19,22,23 20,21,24 | 1 P00507                      |
| 5793 | 1,5,6,8,17, 2,3,4,7,18,<br>19,22,24 20,21,23 | 1 P00507                      |
| 5794 | 1,5,6,8,17, 2,3,4,7,18,<br>19,23,24 20,21,22 | 0                             |
| 5795 | 1,5,6,8,17, 2,3,4,7,18,<br>20,21,22 19,23,24 | 2 P20766,P35745               |
| 5796 | 1,5,6,8,17, 2,3,4,7,18,<br>20,21,23 19,22,24 | 4 P19132,P20766,P23739,P35745 |
| 5797 | 1,5,6,8,17, 2,3,4,7,18,<br>20,21,24 19,22,23 | 1 P20766                      |

|      |                                              |                               |
|------|----------------------------------------------|-------------------------------|
| 5798 | 1,5,6,8,17, 2,3,4,7,18,<br>20,22,23 19,21,24 | 3 O89117,P20766,P23739        |
| 5799 | 1,5,6,8,17, 2,3,4,7,18,<br>20,22,24 19,21,23 | 3 O89117,P13432,P20766        |
| 5800 | 1,5,6,8,17, 2,3,4,7,18,<br>20,23,24 19,21,22 | 1 P23739                      |
| 5801 | 1,5,6,8,17, 2,3,4,7,18,<br>21,22,23 19,20,24 | 2 P20766,P68511               |
| 5802 | 1,5,6,8,17, 2,3,4,7,18,<br>21,22,24 19,20,23 | 2 P10758,P20766               |
| 5803 | 1,5,6,8,17, 2,3,4,7,18,<br>21,23,24 19,20,22 | 3 P36860,Q63474,Q80WL1        |
| 5804 | 1,5,6,8,17, 2,3,4,7,18,<br>22,23,24 19,20,21 | 3 P00507,P47967,P62804        |
| 5805 | 1,5,6,8,18, 2,3,4,7,17,<br>19,20,21 22,23,24 | 2 B0LT89,Q5PQL7               |
| 5806 | 1,5,6,8,18, 2,3,4,7,17,<br>19,20,22 21,23,24 | 1 Q5PQL7                      |
| 5807 | 1,5,6,8,18, 2,3,4,7,17,<br>19,20,23 21,22,24 | 2 P23739,Q9R168               |
| 5808 | 1,5,6,8,18, 2,3,4,7,17,<br>19,20,24 21,22,23 | 2 Q9QW07,Q9R168               |
| 5809 | 1,5,6,8,18, 2,3,4,7,17,<br>19,21,22 20,23,24 | 2 Q5PQL7,Q9QYP1               |
| 5810 | 1,5,6,8,18, 2,3,4,7,17,<br>19,21,23 20,22,24 | 0                             |
| 5811 | 1,5,6,8,18, 2,3,4,7,17,<br>19,21,24 20,22,23 | 0                             |
| 5812 | 1,5,6,8,18, 2,3,4,7,17,<br>19,22,23 20,21,24 | 4 P00507,P19223,Q6AY61,Q811M5 |
| 5813 | 1,5,6,8,18, 2,3,4,7,17,<br>19,22,24 20,21,23 | 2 P00507,P19223               |
| 5814 | 1,5,6,8,18, 2,3,4,7,17,<br>19,23,24 20,21,22 | 1 P19223                      |
| 5815 | 1,5,6,8,18, 2,3,4,7,17,<br>20,21,22 19,23,24 | 2 P54921,Q5PQL7               |
| 5816 | 1,5,6,8,18, 2,3,4,7,17,<br>20,21,23 19,22,24 | 1 P54921                      |
| 5817 | 1,5,6,8,18, 2,3,4,7,17,<br>20,21,24 19,22,23 | 0                             |

|      |                                              |                                             |
|------|----------------------------------------------|---------------------------------------------|
| 5818 | 1,5,6,8,18, 2,3,4,7,17,<br>20,22,23 19,21,24 | 4 P04355,P54921,Q6AY61,Q9WVK7               |
| 5819 | 1,5,6,8,18, 2,3,4,7,17,<br>20,22,24 19,21,23 | 2 P22006,Q9WVK7                             |
| 5820 | 1,5,6,8,18, 2,3,4,7,17,<br>20,23,24 19,21,22 | 4 P23739,Q5QE79,Q9R168,Q9WVK7               |
| 5821 | 1,5,6,8,18, 2,3,4,7,17,<br>21,22,23 19,20,24 | 1 P54921                                    |
| 5822 | 1,5,6,8,18, 2,3,4,7,17,<br>21,22,24 19,20,23 | 1 P10758                                    |
| 5823 | 1,5,6,8,18, 2,3,4,7,17,<br>21,23,24 19,20,22 | 1 P20646                                    |
| 5824 | 1,5,6,8,18, 2,3,4,7,17,<br>22,23,24 19,20,21 | 5 P00507,P13676,P19223,P20646,Q9WVK7        |
| 5825 | 1,5,6,8,19, 2,3,4,7,17,<br>20,21,22 18,23,24 | 4 B0LT89,P19218,P20766,Q5PQL7               |
| 5826 | 1,5,6,8,19, 2,3,4,7,17,<br>20,21,23 18,22,24 | 2 P19218,P23739                             |
| 5827 | 1,5,6,8,19, 2,3,4,7,17,<br>20,21,24 18,22,23 | 6 B0LT89,O35547,P30120,P60905,Q812E4,Q9QW07 |
| 5828 | 1,5,6,8,19, 2,3,4,7,17,<br>20,22,23 18,21,24 | 2 P19218,P23739                             |
| 5829 | 1,5,6,8,19, 2,3,4,7,17,<br>20,22,24 18,21,23 | 1 P19218                                    |
| 5830 | 1,5,6,8,19, 2,3,4,7,17,<br>20,23,24 18,21,22 | 1 P23739                                    |
| 5831 | 1,5,6,8,19, 2,3,4,7,17,<br>21,22,23 18,20,24 | 1 P19218                                    |
| 5832 | 1,5,6,8,19, 2,3,4,7,17,<br>21,22,24 18,20,23 | 1 P30919                                    |
| 5833 | 1,5,6,8,19, 2,3,4,7,17,<br>21,23,24 18,20,22 | 2 Q63474,Q80WL1                             |
| 5834 | 1,5,6,8,19, 2,3,4,7,17,<br>22,23,24 18,20,21 | 5 P00507,P19218,P19223,P25809,Q811M5        |
| 5835 | 1,5,6,8,20, 2,3,4,7,17,<br>21,22,23 18,19,24 | 3 P19218,P20766,P54921                      |
| 5836 | 1,5,6,8,20, 2,3,4,7,17,<br>21,22,24 18,19,23 | 1 P20766                                    |
| 5837 | 1,5,6,8,20, 2,3,4,7,17,<br>21,23,24 18,19,22 | 1 P23739                                    |

|      |                                              |                                             |
|------|----------------------------------------------|---------------------------------------------|
| 5838 | 1,5,6,8,20, 2,3,4,7,17,<br>22,23,24 18,19,21 | 4 P20766,P23739,Q5QE79,Q9WVK7               |
| 5839 | 1,5,6,8,21, 2,3,4,7,17,<br>22,23,24 18,19,20 | 5 P20646,P20766,P30919,Q62714,Q8K1G0        |
| 5840 | 1,5,6,17,1 2,3,4,7,8,2<br>8,19,20,21 2,23,24 | 6 BOLT89,P05539,P20761,P35280,Q5PQL7,Q6P6R2 |
| 5841 | 1,5,6,17,1 2,3,4,7,8,2<br>8,19,20,22 1,23,24 | 4 BOLT89,P00762,P20761,Q5PQL7               |
| 5842 | 1,5,6,17,1 2,3,4,7,8,2<br>8,19,20,23 1,22,24 | 4 P00762,P02625,P11883,P35280               |
| 5843 | 1,5,6,17,1 2,3,4,7,8,2<br>8,19,20,24 1,22,23 | 4 BOLT89,P11883,P20761,P35280               |
| 5844 | 1,5,6,17,1 2,3,4,7,8,2<br>8,19,21,22 0,23,24 | 5 P00762,P05539,P20761,Q4G075,Q5PQL7        |
| 5845 | 1,5,6,17,1 2,3,4,7,8,2<br>8,19,21,23 0,22,24 | 4 O70417,P00762,P35280,Q4G075               |
| 5846 | 1,5,6,17,1 2,3,4,7,8,2<br>8,19,21,24 0,22,23 | 4 P05539,P20761,P35280,Q4G075               |
| 5847 | 1,5,6,17,1 2,3,4,7,8,2<br>8,19,22,23 0,21,24 | 4 D4A5U3,P00762,Q811M5,Q9EQS0               |
| 5848 | 1,5,6,17,1 2,3,4,7,8,2<br>8,19,22,24 0,21,23 | 4 D4A5U3,P00762,P20761,Q4G075               |
| 5849 | 1,5,6,17,1 2,3,4,7,8,2<br>8,19,23,24 0,21,22 | 5 D4A5U3,P00762,P11883,P35280,Q4G075        |
| 5850 | 1,5,6,17,1 2,3,4,7,8,1<br>8,20,21,22 9,23,24 | 3 P05539,P20761,Q5PQL7                      |
| 5851 | 1,5,6,17,1 2,3,4,7,8,1<br>8,20,21,23 9,22,24 | 1 P35280                                    |
| 5852 | 1,5,6,17,1 2,3,4,7,8,1<br>8,20,21,24 9,22,23 | 3 P05539,P20761,P35280                      |
| 5853 | 1,5,6,17,1 2,3,4,7,8,1<br>8,20,22,23 9,21,24 | 2 P04355,P11883                             |
| 5854 | 1,5,6,17,1 2,3,4,7,8,1<br>8,20,22,24 9,21,23 | 3 P11883,P20761,P22006                      |
| 5855 | 1,5,6,17,1 2,3,4,7,8,1<br>8,20,23,24 9,21,22 | 3 P04355,P11883,P35280                      |
| 5856 | 1,5,6,17,1 2,3,4,7,8,1<br>8,21,22,23 9,20,24 | 5 D4A5U3,P68511,P82471,Q4G075,Q6TMA8        |
| 5857 | 1,5,6,17,1 2,3,4,7,8,1<br>8,21,22,24 9,20,23 | 5 D4A5U3,P05539,P10758,P20761,Q4G075        |

|      |                                              |                                                                                                   |
|------|----------------------------------------------|---------------------------------------------------------------------------------------------------|
| 5858 | 1,5,6,17,1 2,3,4,7,8,1<br>8,21,23,24 9,20,22 | 5 D4A5U3,O70417,P35280,P36860,Q4G075                                                              |
| 5859 | 1,5,6,17,1 2,3,4,7,8,1<br>8,22,23,24 9,20,21 | 13 D4A5U3,P00762,P02780,P11883,P22273,P47967,P62804,Q00715,Q4G075,Q5I0D1,Q63617,Q9E<br>QS0,Q9WTT6 |
| 5860 | 1,5,6,17,1 2,3,4,7,8,1<br>9,20,21,22 8,23,24 | 8 BOLT89,P05539,P20761,P20762,P20766,Q3ZAV1,Q5I0J9,Q5PQL7                                         |
| 5861 | 1,5,6,17,1 2,3,4,7,8,1<br>9,20,21,23 8,22,24 | 3 BOLT89,P20766,P35280                                                                            |
| 5862 | 1,5,6,17,1 2,3,4,7,8,1<br>9,20,21,24 8,22,23 | 7 BOLT89,O35547,P05539,P20761,P20762,P20766,P35280                                                |
| 5863 | 1,5,6,17,1 2,3,4,7,8,1<br>9,20,22,23 8,21,24 | 6 O89117,P00762,P02625,P20766,P23739,Q00715                                                       |
| 5864 | 1,5,6,17,1 2,3,4,7,8,1<br>9,20,22,24 8,21,23 | 5 O89117,P02625,P20761,P20762,P20766                                                              |
| 5865 | 1,5,6,17,1 2,3,4,7,8,1<br>9,20,23,24 8,21,22 | 5 P02625,P11883,P23739,P35280,Q00715                                                              |
| 5866 | 1,5,6,17,1 2,3,4,7,8,1<br>9,21,22,23 8,20,24 | 1 P20766                                                                                          |
| 5867 | 1,5,6,17,1 2,3,4,7,8,1<br>9,21,22,24 8,20,23 | 6 P05539,P20761,P20762,P20766,Q4G075,Q5BJY9                                                       |
| 5868 | 1,5,6,17,1 2,3,4,7,8,1<br>9,21,23,24 8,20,22 | 3 O70417,P35280,Q4G075                                                                            |
| 5869 | 1,5,6,17,1 2,3,4,7,8,1<br>9,22,23,24 8,20,21 | 10 D4A5U3,P00507,P00762,P02625,P22273,P25809,P62804,Q00715,Q4G075,Q811M5                          |
| 5870 | 1,5,6,17,2 2,3,4,7,8,1<br>0,21,22,23 8,19,24 | 1 P20766                                                                                          |
| 5871 | 1,5,6,17,2 2,3,4,7,8,1<br>0,21,22,24 8,19,23 | 4 P05539,P20761,P20762,P20766                                                                     |
| 5872 | 1,5,6,17,2 2,3,4,7,8,1<br>0,21,23,24 8,19,22 | 3 P20766,P23739,P35280                                                                            |
| 5873 | 1,5,6,17,2 2,3,4,7,8,1<br>0,22,23,24 8,19,21 | 7 P02625,P11883,P20766,P23739,P62804,Q00715,Q66H69                                                |
| 5874 | 1,5,6,17,2 2,3,4,7,8,1<br>1,22,23,24 8,19,20 | 4 D4A5U3,O70417,P20766,Q4G075                                                                     |
| 5875 | 1,5,6,18,1 2,3,4,7,8,1<br>9,20,21,22 7,23,24 | 2 P20761,Q5PQL7                                                                                   |
| 5876 | 1,5,6,18,1 2,3,4,7,8,1<br>9,20,21,23 7,22,24 | 3 O70417,P23593,P35280                                                                            |
| 5877 | 1,5,6,18,1 2,3,4,7,8,1<br>9,20,21,24 7,22,23 | 2 P20761,P35280                                                                                   |

|      |                                              |                                                                                                      |
|------|----------------------------------------------|------------------------------------------------------------------------------------------------------|
| 5878 | 1,5,6,18,1 2,3,4,7,8,1<br>9,20,22,23 7,21,24 | 4 P00762,P04355,Q811M5,Q9EQS0                                                                        |
| 5879 | 1,5,6,18,1 2,3,4,7,8,1<br>9,20,22,24 7,21,23 | 3 P20761,P22006,Q5PQL7                                                                               |
| 5880 | 1,5,6,18,1 2,3,4,7,8,1<br>9,20,23,24 7,21,22 | 2 P11883,P35280                                                                                      |
| 5881 | 1,5,6,18,1 2,3,4,7,8,1<br>9,21,22,23 7,20,24 | 6 D4A5U3,O70417,P13676,P19223,Q4G075,Q811M5                                                          |
| 5882 | 1,5,6,18,1 2,3,4,7,8,1<br>9,21,22,24 7,20,23 | 7 D4A5U3,O70417,P13676,P19223,P20761,P36376,Q4G075                                                   |
| 5883 | 1,5,6,18,1 2,3,4,7,8,1<br>9,21,23,24 7,20,22 | 6 D4A5U3,O70417,P13676,P19223,P35280,Q4G075                                                          |
| 5884 | 1,5,6,18,1 2,3,4,7,8,1<br>9,22,23,24 7,20,21 | 14 D4A5U3,O70417,P00507,P00762,P13676,P19223,P22273,P25809,P62804,Q00715,Q4G075,Q811M5,Q9EQS0,Q9WTT6 |
| 5885 | 1,5,6,18,2 2,3,4,7,8,1<br>0,21,22,23 7,19,24 | 2 O70417,P54921                                                                                      |
| 5886 | 1,5,6,18,2 2,3,4,7,8,1<br>0,21,22,24 7,19,23 | 2 P20761,Q5PQL7                                                                                      |
| 5887 | 1,5,6,18,2 2,3,4,7,8,1<br>0,21,23,24 7,19,22 | 3 O70417,P20646,P35280                                                                               |
| 5888 | 1,5,6,18,2 2,3,4,7,8,1<br>0,22,23,24 7,19,21 | 11 P04355,P11883,P20646,P22006,P62804,Q00715,Q5QE79,Q66H69,Q9EQS0,Q9QX74,Q9WVK7                      |
| 5889 | 1,5,6,18,2 2,3,4,7,8,1<br>1,22,23,24 7,19,20 | 9 D4A5U3,O70417,P13676,P19223,P20646,Q4G075,Q5U2V4,Q811M5,Q9WTT6                                     |
| 5890 | 1,5,6,19,2 2,3,4,7,8,1<br>0,21,22,23 7,18,24 | 3 O70417,P19218,P20766                                                                               |
| 5891 | 1,5,6,19,2 2,3,4,7,8,1<br>0,21,22,24 7,18,23 | 4 O70594,P20761,P20766,Q5PQL7                                                                        |
| 5892 | 1,5,6,19,2 2,3,4,7,8,1<br>0,21,23,24 7,18,22 | 3 O70417,P23739,P35280                                                                               |
| 5893 | 1,5,6,19,2 2,3,4,7,8,1<br>0,22,23,24 7,18,21 | 9 P02625,P20766,P22006,P23739,P26772,P62804,Q00715,Q811M5,Q9QX74                                     |
| 5894 | 1,5,6,19,2 2,3,4,7,8,1<br>1,22,23,24 7,18,20 | 9 D4A5U3,O70417,P00774,P13676,P19223,P20766,P25809,Q4G075,Q811M5                                     |
| 5895 | 1,5,6,20,2 2,3,4,7,8,1<br>1,22,23,24 7,18,19 | 3 O70417,P20646,P20766                                                                               |
| 5896 | 1,5,7,8,17, 2,3,4,6,21,<br>18,19,20 22,23,24 | 8 B0LT89,P06760,P09656,P30919,P47727,Q811M5,Q9QX74,Q9WTT6                                            |
| 5897 | 1,5,7,8,17, 2,3,4,6,20,<br>18,19,21 22,23,24 | 6 P06760,P09656,P22006,Q66H69,Q6P6R2,Q9QX74                                                          |

|      |                                              |                                                                                 |
|------|----------------------------------------------|---------------------------------------------------------------------------------|
| 5898 | 1,5,7,8,17, 2,3,4,6,20,<br>18,19,22 21,23,24 | 2 P09656,Q9QX74                                                                 |
| 5899 | 1,5,7,8,17, 2,3,4,6,20,<br>18,19,23 21,22,24 | 4 O55145,P21674,P22006,Q9QX74                                                   |
| 5900 | 1,5,7,8,17, 2,3,4,6,20,<br>18,19,24 21,22,23 | 3 O55145,P02783,P09656                                                          |
| 5901 | 1,5,7,8,17, 2,3,4,6,19,<br>18,20,21 22,23,24 | 6 P00507,P06760,P35745,Q811M5,Q9QX74,Q9WTT6                                     |
| 5902 | 1,5,7,8,17, 2,3,4,6,19,<br>18,20,22 21,23,24 | 1 P35745                                                                        |
| 5903 | 1,5,7,8,17, 2,3,4,6,19,<br>18,20,23 21,22,24 | 4 P19132,P23739,P30919,P35745                                                   |
| 5904 | 1,5,7,8,17, 2,3,4,6,19,<br>18,20,24 21,22,23 | 5 P02783,P09656,P13432,P35745,Q811M5                                            |
| 5905 | 1,5,7,8,17, 2,3,4,6,19,<br>18,21,22 20,23,24 | 3 P06760,P35745,Q9QX74                                                          |
| 5906 | 1,5,7,8,17, 2,3,4,6,19,<br>18,21,23 20,22,24 | 7 P06760,P19814,P21674,P22006,P35745,Q9QX74,Q9Z0V6                              |
| 5907 | 1,5,7,8,17, 2,3,4,6,19,<br>18,21,24 20,22,23 | 6 P02783,P06760,P35745,P42854,Q811M5,Q9QX74                                     |
| 5908 | 1,5,7,8,17, 2,3,4,6,19,<br>18,22,23 20,21,24 | 1 P35745                                                                        |
| 5909 | 1,5,7,8,17, 2,3,4,6,19,<br>18,22,24 20,21,23 | 2 P09656,P49134                                                                 |
| 5910 | 1,5,7,8,17, 2,3,4,6,19,<br>18,23,24 20,21,22 | 2 O55145,P35745                                                                 |
| 5911 | 1,5,7,8,17, 2,3,4,6,18,<br>19,20,21 22,23,24 | 11 B0LT89,P06760,P13676,P35745,P36374,P55159,Q6P6R2,Q811M5,Q812E4,Q9QX74,Q9WTT6 |
| 5912 | 1,5,7,8,17, 2,3,4,6,18,<br>19,20,22 21,23,24 | 2 O89117,Q9WTT6                                                                 |
| 5913 | 1,5,7,8,17, 2,3,4,6,18,<br>19,20,23 21,22,24 | 4 P21674,P23739,Q8CJD3,Q9WTT6                                                   |
| 5914 | 1,5,7,8,17, 2,3,4,6,18,<br>19,20,24 21,22,23 | 6 P09456,P09656,P36374,P54921,Q812E4,Q9WTT6                                     |
| 5915 | 1,5,7,8,17, 2,3,4,6,18,<br>19,21,22 20,23,24 | 2 P06760,Q9QX74                                                                 |
| 5916 | 1,5,7,8,17, 2,3,4,6,18,<br>19,21,23 20,22,24 | 4 P06760,P21674,P22006,Q9QX74                                                   |
| 5917 | 1,5,7,8,17, 2,3,4,6,18,<br>19,21,24 20,22,23 | 5 P06760,P54921,Q63474,Q99MH3,Q9QX74                                            |

|      |                                              |                                                           |
|------|----------------------------------------------|-----------------------------------------------------------|
| 5918 | 1,5,7,8,17, 2,3,4,6,18,<br>19,22,23 20,21,24 | 1 O55145                                                  |
| 5919 | 1,5,7,8,17, 2,3,4,6,18,<br>19,22,24 20,21,23 | 2 O55145,P09656                                           |
| 5920 | 1,5,7,8,17, 2,3,4,6,18,<br>19,23,24 20,21,22 | 1 O55145                                                  |
| 5921 | 1,5,7,8,17, 2,3,4,6,18,<br>20,21,22 19,23,24 | 4 P06760,P35745,Q9QX74,Q9WTT6                             |
| 5922 | 1,5,7,8,17, 2,3,4,6,18,<br>20,21,23 19,22,24 | 6 P06760,P19132,P23739,P35745,Q9QX74,Q9WTT6               |
| 5923 | 1,5,7,8,17, 2,3,4,6,18,<br>20,21,24 19,22,23 | 8 P02782,P06760,P09456,P30120,P35745,Q811M5,Q812E4,Q9WTT6 |
| 5924 | 1,5,7,8,17, 2,3,4,6,18,<br>20,22,23 19,21,24 | 2 P23739,P35745                                           |
| 5925 | 1,5,7,8,17, 2,3,4,6,18,<br>20,22,24 19,21,23 | 1 P35745                                                  |
| 5926 | 1,5,7,8,17, 2,3,4,6,18,<br>20,23,24 19,21,22 | 2 P23739,P35745                                           |
| 5927 | 1,5,7,8,17, 2,3,4,6,18,<br>21,22,23 19,20,24 | 2 P35745,P68511                                           |
| 5928 | 1,5,7,8,17, 2,3,4,6,18,<br>21,22,24 19,20,23 | 1 P35745                                                  |
| 5929 | 1,5,7,8,17, 2,3,4,6,18,<br>21,23,24 19,20,22 | 3 P35745,Q63474,Q80WL1                                    |
| 5930 | 1,5,7,8,17, 2,3,4,6,18,<br>22,23,24 19,20,21 | 2 O55145,P35745                                           |
| 5931 | 1,5,7,8,18, 2,3,4,6,17,<br>19,20,21 22,23,24 | 8 D3ZUC6,P06760,P07335,P47967,P55159,Q5I0D1,Q812E4,Q9WTT6 |
| 5932 | 1,5,7,8,18, 2,3,4,6,17,<br>19,20,22 21,23,24 | 0                                                         |
| 5933 | 1,5,7,8,18, 2,3,4,6,17,<br>19,20,23 21,22,24 | 1 P23739                                                  |
| 5934 | 1,5,7,8,18, 2,3,4,6,17,<br>19,20,24 21,22,23 | 1 P09656                                                  |
| 5935 | 1,5,7,8,18, 2,3,4,6,17,<br>19,21,22 20,23,24 | 1 P06760                                                  |
| 5936 | 1,5,7,8,18, 2,3,4,6,17,<br>19,21,23 20,22,24 | 2 P06760,P22006                                           |
| 5937 | 1,5,7,8,18, 2,3,4,6,17,<br>19,21,24 20,22,23 | 2 P06760,P09656                                           |



|      |                                              |                                                                  |
|------|----------------------------------------------|------------------------------------------------------------------|
| 5938 | 1,5,7,8,18, 2,3,4,6,17,<br>19,22,23 20,21,24 | 1 P19223                                                         |
| 5939 | 1,5,7,8,18, 2,3,4,6,17,<br>19,22,24 20,21,23 | 3 P09656,P19223,P63029                                           |
| 5940 | 1,5,7,8,18, 2,3,4,6,17,<br>19,23,24 20,21,22 | 2 O55145,P19223                                                  |
| 5941 | 1,5,7,8,18, 2,3,4,6,17,<br>20,21,22 19,23,24 | 2 P06760,P35745                                                  |
| 5942 | 1,5,7,8,18, 2,3,4,6,17,<br>20,21,23 19,22,24 | 4 D3ZUC6,P06760,P19132,P35745                                    |
| 5943 | 1,5,7,8,18, 2,3,4,6,17,<br>20,21,24 19,22,23 | 4 P06760,P35745,Q811M5,Q812E4                                    |
| 5944 | 1,5,7,8,18, 2,3,4,6,17,<br>20,22,23 19,21,24 | 2 P35745,Q9WVK7                                                  |
| 5945 | 1,5,7,8,18, 2,3,4,6,17,<br>20,22,24 19,21,23 | 1 Q9WVK7                                                         |
| 5946 | 1,5,7,8,18, 2,3,4,6,17,<br>20,23,24 19,21,22 | 2 P23739,Q9WVK7                                                  |
| 5947 | 1,5,7,8,18, 2,3,4,6,17,<br>21,22,23 19,20,24 | 1 P35745                                                         |
| 5948 | 1,5,7,8,18, 2,3,4,6,17,<br>21,22,24 19,20,23 | 1 P49134                                                         |
| 5949 | 1,5,7,8,18, 2,3,4,6,17,<br>21,23,24 19,20,22 | 1 O89117                                                         |
| 5950 | 1,5,7,8,18, 2,3,4,6,17,<br>22,23,24 19,20,21 | 3 P19223,P49134,Q9WVK7                                           |
| 5951 | 1,5,7,8,19, 2,3,4,6,17,<br>20,21,22 18,23,24 | 3 P06760,P19218,Q9WTT6                                           |
| 5952 | 1,5,7,8,19, 2,3,4,6,17,<br>20,21,23 18,22,24 | 5 D3ZUC6,P06760,P23739,Q812E4,Q9WTT6                             |
| 5953 | 1,5,7,8,19, 2,3,4,6,17,<br>20,21,24 18,22,23 | 9 O35547,P02782,P06760,P08723,P09456,P30120,P55159,Q812E4,Q9WUC4 |
| 5954 | 1,5,7,8,19, 2,3,4,6,17,<br>20,22,23 18,21,24 | 3 P01039,P19218,P23739                                           |
| 5955 | 1,5,7,8,19, 2,3,4,6,17,<br>20,22,24 18,21,23 | 1 P19218                                                         |
| 5956 | 1,5,7,8,19, 2,3,4,6,17,<br>20,23,24 18,21,22 | 2 P23739,Q812E4                                                  |
| 5957 | 1,5,7,8,19, 2,3,4,6,17,<br>21,22,23 18,20,24 | 0                                                                |

|      |                                              |                                                                          |
|------|----------------------------------------------|--------------------------------------------------------------------------|
| 5958 | 1,5,7,8,19, 2,3,4,6,17,<br>21,22,24 18,20,23 | 1 P55091                                                                 |
| 5959 | 1,5,7,8,19, 2,3,4,6,17,<br>21,23,24 18,20,22 | 3 P08649,Q63474,Q80WL1                                                   |
| 5960 | 1,5,7,8,19, 2,3,4,6,17,<br>22,23,24 18,20,21 | 4 O55145,P01041,P19223,P55091                                            |
| 5961 | 1,5,7,8,20, 2,3,4,6,17,<br>21,22,23 18,19,24 | 3 P08649,P23739,P35745                                                   |
| 5962 | 1,5,7,8,20, 2,3,4,6,17,<br>21,22,24 18,19,23 | 2 P08649,P35745                                                          |
| 5963 | 1,5,7,8,20, 2,3,4,6,17,<br>21,23,24 18,19,22 | 5 P08649,P23739,P35745,Q06000,Q812E4                                     |
| 5964 | 1,5,7,8,20, 2,3,4,6,17,<br>22,23,24 18,19,21 | 3 P23739,P35745,Q9WVK7                                                   |
| 5965 | 1,5,7,8,21, 2,3,4,6,17,<br>22,23,24 18,19,20 | 4 P08649,P35745,Q62714,Q8K1G0                                            |
| 5966 | 1,5,7,17,1 2,3,4,6,8,2<br>8,19,20,21 2,23,24 | 8 B0LT89,P00507,P06760,P20761,P23593,P30919,Q63532,Q6P6R2                |
| 5967 | 1,5,7,17,1 2,3,4,6,8,2<br>8,19,20,22 1,23,24 | 6 P00762,P09656,P20761,P30919,Q05702,Q63532                              |
| 5968 | 1,5,7,17,1 2,3,4,6,8,2<br>8,19,20,23 1,22,24 | 5 P00762,P02625,P30919,Q10743,Q6AYC4                                     |
| 5969 | 1,5,7,17,1 2,3,4,6,8,2<br>8,19,20,24 1,22,23 | 7 P02783,P09656,P20761,P30919,P54921,Q63532,Q6AYC4                       |
| 5970 | 1,5,7,17,1 2,3,4,6,8,2<br>8,19,21,22 0,23,24 | 5 P00762,P17559,P20761,P36376,Q05702                                     |
| 5971 | 1,5,7,17,1 2,3,4,6,8,2<br>8,19,21,23 0,22,24 | 3 P21674,P22006,Q10743                                                   |
| 5972 | 1,5,7,17,1 2,3,4,6,8,2<br>8,19,21,24 0,22,23 | 9 P02783,P09656,P17559,P20761,P36376,P42854,P54921,Q63532,Q99MH3         |
| 5973 | 1,5,7,17,1 2,3,4,6,8,2<br>8,19,22,23 0,21,24 | 6 D4A5U3,O55145,P00762,P02625,Q05702,Q10743                              |
| 5974 | 1,5,7,17,1 2,3,4,6,8,2<br>8,19,22,24 0,21,23 | 10 D4A5U3,O55145,P00762,P02631,P09656,P17559,P20761,P36376,P42854,Q05702 |
| 5975 | 1,5,7,17,1 2,3,4,6,8,2<br>8,19,23,24 0,21,22 | 5 D4A5U3,O55145,P00762,Q10743,Q6AYC4                                     |
| 5976 | 1,5,7,17,1 2,3,4,6,8,1<br>8,20,21,22 9,23,24 | 2 P20761,P42854                                                          |
| 5977 | 1,5,7,17,1 2,3,4,6,8,1<br>8,20,21,23 9,22,24 | 2 P30919,Q10743                                                          |

|      |                                              |                                                           |
|------|----------------------------------------------|-----------------------------------------------------------|
| 5978 | 1,5,7,17,1 2,3,4,6,8,1<br>8,20,21,24 9,22,23 | 6 P00507,P02783,P20761,P42854,Q63532,Q811M5               |
| 5979 | 1,5,7,17,1 2,3,4,6,8,1<br>8,20,22,23 9,21,24 | 2 P30919,Q10743                                           |
| 5980 | 1,5,7,17,1 2,3,4,6,8,1<br>8,20,22,24 9,21,23 | 3 P20761,P42854,Q63532                                    |
| 5981 | 1,5,7,17,1 2,3,4,6,8,1<br>8,20,23,24 9,21,22 | 4 P23739,P30919,Q10743,Q6AYC4                             |
| 5982 | 1,5,7,17,1 2,3,4,6,8,1<br>8,21,22,23 9,20,24 | 2 P68511,Q10743                                           |
| 5983 | 1,5,7,17,1 2,3,4,6,8,1<br>8,21,22,24 9,20,23 | 3 P36376,P42854,Q05702                                    |
| 5984 | 1,5,7,17,1 2,3,4,6,8,1<br>8,21,23,24 9,20,22 | 2 P42854,P50280                                           |
| 5985 | 1,5,7,17,1 2,3,4,6,8,1<br>8,22,23,24 9,20,21 | 7 D4A5U3,O55145,P00762,P02631,P42854,Q05702,Q10743        |
| 5986 | 1,5,7,17,1 2,3,4,6,8,1<br>9,20,21,22 8,23,24 | 3 P20761,P20762,Q05702                                    |
| 5987 | 1,5,7,17,1 2,3,4,6,8,1<br>9,20,21,23 8,22,24 | 3 P02625,P23593,P23739                                    |
| 5988 | 1,5,7,17,1 2,3,4,6,8,1<br>9,20,21,24 8,22,23 | 6 P20761,P20762,P54921,Q63532,Q6AY61,Q99MH3               |
| 5989 | 1,5,7,17,1 2,3,4,6,8,1<br>9,20,22,23 8,21,24 | 4 P02625,P23739,Q05702,Q10743                             |
| 5990 | 1,5,7,17,1 2,3,4,6,8,1<br>9,20,22,24 8,21,23 | 5 P02625,P20761,P54921,Q05702,Q63532                      |
| 5991 | 1,5,7,17,1 2,3,4,6,8,1<br>9,20,23,24 8,21,22 | 4 P02625,P23739,P54921,Q6AYC4                             |
| 5992 | 1,5,7,17,1 2,3,4,6,8,1<br>9,21,22,23 8,20,24 | 3 P12020,Q05702,Q9R168                                    |
| 5993 | 1,5,7,17,1 2,3,4,6,8,1<br>9,21,22,24 8,20,23 | 8 P17559,P36376,P42854,P54921,Q05702,Q5BJY9,Q99MH3,Q9R168 |
| 5994 | 1,5,7,17,1 2,3,4,6,8,1<br>9,21,23,24 8,20,22 | 1 P12020                                                  |
| 5995 | 1,5,7,17,1 2,3,4,6,8,1<br>9,22,23,24 8,20,21 | 8 D4A5U3,O55145,P00762,P02625,P02631,P25809,Q00715,Q05702 |
| 5996 | 1,5,7,17,2 2,3,4,6,8,1<br>0,21,22,23 8,19,24 | 0                                                         |
| 5997 | 1,5,7,17,2 2,3,4,6,8,1<br>0,21,22,24 8,19,23 | 2 P20761,P42854                                           |

|      |                                              |                                                                                 |
|------|----------------------------------------------|---------------------------------------------------------------------------------|
| 5998 | 1,5,7,17,2 2,3,4,6,8,1<br>0,21,23,24 8,19,22 | 2 P08649,P23739                                                                 |
| 5999 | 1,5,7,17,2 2,3,4,6,8,1<br>0,22,23,24 8,19,21 | 2 P02625,P23739                                                                 |
| 6000 | 1,5,7,17,2 2,3,4,6,8,1<br>1,22,23,24 8,19,20 | 3 P50280,Q05702,Q9R168                                                          |
| 6001 | 1,5,7,18,1 2,3,4,6,8,1<br>9,20,21,22 7,23,24 | 5 P20761,P47967,P97840,Q05702,Q5PQL7                                            |
| 6002 | 1,5,7,18,1 2,3,4,6,8,1<br>9,20,21,23 7,22,24 | 1 P23593                                                                        |
| 6003 | 1,5,7,18,1 2,3,4,6,8,1<br>9,20,21,24 7,22,23 | 4 P20761,P23593,Q63532,Q99MH3                                                   |
| 6004 | 1,5,7,18,1 2,3,4,6,8,1<br>9,20,22,23 7,21,24 | 3 P02625,Q05702,Q10743                                                          |
| 6005 | 1,5,7,18,1 2,3,4,6,8,1<br>9,20,22,24 7,21,23 | 3 P20761,Q05702,Q63532                                                          |
| 6006 | 1,5,7,18,1 2,3,4,6,8,1<br>9,20,23,24 7,21,22 | 2 P23739,Q6AYC4                                                                 |
| 6007 | 1,5,7,18,1 2,3,4,6,8,1<br>9,21,22,23 7,20,24 | 5 D4A5U3,O70417,P17559,P19223,Q05702                                            |
| 6008 | 1,5,7,18,1 2,3,4,6,8,1<br>9,21,22,24 7,20,23 | 6 D4A5U3,P17559,P19223,P36376,P55091,Q05702                                     |
| 6009 | 1,5,7,18,1 2,3,4,6,8,1<br>9,21,23,24 7,20,22 | 5 D4A5U3,O70417,P12020,P17559,P19223                                            |
| 6010 | 1,5,7,18,1 2,3,4,6,8,1<br>9,22,23,24 7,20,21 | 11 D4A5U3,P00762,P02631,P17559,P19223,P25809,P26772,P55091,P63029,Q05702,Q9WVK7 |
| 6011 | 1,5,7,18,2 2,3,4,6,8,1<br>0,21,22,23 7,19,24 | 0                                                                               |
| 6012 | 1,5,7,18,2 2,3,4,6,8,1<br>0,21,22,24 7,19,23 | 2 P20761,P42854                                                                 |
| 6013 | 1,5,7,18,2 2,3,4,6,8,1<br>0,21,23,24 7,19,22 | 1 O70417                                                                        |
| 6014 | 1,5,7,18,2 2,3,4,6,8,1<br>0,22,23,24 7,19,21 | 1 Q9WVK7                                                                        |
| 6015 | 1,5,7,18,2 2,3,4,6,8,1<br>1,22,23,24 7,19,20 | 6 D4A5U3,O70417,P13676,P17559,P19223,Q05702                                     |
| 6016 | 1,5,7,19,2 2,3,4,6,8,1<br>0,21,22,23 7,18,24 | 2 P08649,Q99PP0                                                                 |
| 6017 | 1,5,7,19,2 2,3,4,6,8,1<br>0,21,22,24 7,18,23 | 5 O70594,P08649,P20761,Q05702,Q99PP0                                            |

|      |                                              |                                                                          |
|------|----------------------------------------------|--------------------------------------------------------------------------|
| 6018 | 1,5,7,19,2 2,3,4,6,8,1<br>0,21,23,24 7,18,22 | 5 O70417,P08649,P23593,P23739,Q99PP0                                     |
| 6019 | 1,5,7,19,2 2,3,4,6,8,1<br>0,22,23,24 7,18,21 | 7 P02625,P08649,P23739,P26772,Q05702,Q99PP0,Q9QZQ5                       |
| 6020 | 1,5,7,19,2 2,3,4,6,8,1<br>1,22,23,24 7,18,20 | 10 D4A5U3,O70417,P08649,P12020,P17559,P19223,P55091,Q05702,Q99PP0,Q9QZQ5 |
| 6021 | 1,5,7,20,2 2,3,4,6,8,1<br>1,22,23,24 7,18,19 | 2 P08649,Q99PP0                                                          |
| 6022 | 1,5,8,17,1 2,3,4,6,7,2<br>8,19,20,21 2,23,24 | 6 BOLT89,P06760,P20761,P47727,Q6P6R2,Q9QX74                              |
| 6023 | 1,5,8,17,1 2,3,4,6,7,2<br>8,19,20,22 1,23,24 | 2 BOLT89,P09656                                                          |
| 6024 | 1,5,8,17,1 2,3,4,6,7,2<br>8,19,20,23 1,22,24 | 3 BOLT89,P23739,P30919                                                   |
| 6025 | 1,5,8,17,1 2,3,4,6,7,2<br>8,19,20,24 1,22,23 | 4 BOLT89,P02783,P09656,P80299                                            |
| 6026 | 1,5,8,17,1 2,3,4,6,7,2<br>8,19,21,22 0,23,24 | 0                                                                        |
| 6027 | 1,5,8,17,1 2,3,4,6,7,2<br>8,19,21,23 0,22,24 | 4 P21674,P22006,P80299,Q9QX74                                            |
| 6028 | 1,5,8,17,1 2,3,4,6,7,2<br>8,19,21,24 0,22,23 | 5 P02783,P09656,P42854,P80299,Q62894                                     |
| 6029 | 1,5,8,17,1 2,3,4,6,7,2<br>8,19,22,23 0,21,24 | 3 O55145,P00714,P11598                                                   |
| 6030 | 1,5,8,17,1 2,3,4,6,7,2<br>8,19,22,24 0,21,23 | 3 O55145,P09656,P80299                                                   |
| 6031 | 1,5,8,17,1 2,3,4,6,7,2<br>8,19,23,24 0,21,22 | 2 O55145,P80299                                                          |
| 6032 | 1,5,8,17,1 2,3,4,6,7,1<br>8,20,21,22 9,23,24 | 0                                                                        |
| 6033 | 1,5,8,17,1 2,3,4,6,7,1<br>8,20,21,23 9,22,24 | 3 P19132,P23739,P80299                                                   |
| 6034 | 1,5,8,17,1 2,3,4,6,7,1<br>8,20,21,24 9,22,23 | 4 P02783,P42854,P80299,Q811M5                                            |
| 6035 | 1,5,8,17,1 2,3,4,6,7,1<br>8,20,22,23 9,21,24 | 2 P00714,P23739                                                          |
| 6036 | 1,5,8,17,1 2,3,4,6,7,1<br>8,20,22,24 9,21,23 | 2 P42854,P80299                                                          |
| 6037 | 1,5,8,17,1 2,3,4,6,7,1<br>8,20,23,24 9,21,22 | 3 P23739,P80299,Q6AYC4                                                   |

|      |                                              |                                                           |
|------|----------------------------------------------|-----------------------------------------------------------|
| 6038 | 1,5,8,17,1 2,3,4,6,7,1<br>8,21,22,23 9,20,24 | 2 P00714,P68511                                           |
| 6039 | 1,5,8,17,1 2,3,4,6,7,1<br>8,21,22,24 9,20,23 | 3 P10758,P42854,P80299                                    |
| 6040 | 1,5,8,17,1 2,3,4,6,7,1<br>8,21,23,24 9,20,22 | 3 P42854,P80299,Q80WL1                                    |
| 6041 | 1,5,8,17,1 2,3,4,6,7,1<br>8,22,23,24 9,20,21 | 8 O55145,P00714,P05369,P11598,P47967,P80299,Q63617,Q9R0T3 |
| 6042 | 1,5,8,17,1 2,3,4,6,7,1<br>9,20,21,22 8,23,24 | 4 BOLT89,P06760,P20766,Q6P6R2                             |
| 6043 | 1,5,8,17,1 2,3,4,6,7,1<br>9,20,21,23 8,22,24 | 5 BOLT89,P06760,P20766,P23739,Q6P6R2                      |
| 6044 | 1,5,8,17,1 2,3,4,6,7,1<br>9,20,21,24 8,22,23 | 6 BOLT89,P06760,P30120,P60905,P80299,Q99MH3               |
| 6045 | 1,5,8,17,1 2,3,4,6,7,1<br>9,20,22,23 8,21,24 | 3 O89117,P20766,P23739                                    |
| 6046 | 1,5,8,17,1 2,3,4,6,7,1<br>9,20,22,24 8,21,23 | 2 O89117,P20766                                           |
| 6047 | 1,5,8,17,1 2,3,4,6,7,1<br>9,20,23,24 8,21,22 | 2 P23739,P80299                                           |
| 6048 | 1,5,8,17,1 2,3,4,6,7,1<br>9,21,22,23 8,20,24 | 1 P20766                                                  |
| 6049 | 1,5,8,17,1 2,3,4,6,7,1<br>9,21,22,24 8,20,23 | 4 P20766,P80299,Q62894,Q80WL1                             |
| 6050 | 1,5,8,17,1 2,3,4,6,7,1<br>9,21,23,24 8,20,22 | 2 P80299,Q80WL1                                           |
| 6051 | 1,5,8,17,1 2,3,4,6,7,1<br>9,22,23,24 8,20,21 | 6 O55145,P00507,P11598,P80299,Q00715,Q80WL1               |
| 6052 | 1,5,8,17,2 2,3,4,6,7,1<br>0,21,22,23 8,19,24 | 3 P20766,P23739,P35745                                    |
| 6053 | 1,5,8,17,2 2,3,4,6,7,1<br>0,21,22,24 8,19,23 | 2 P20766,P80299                                           |
| 6054 | 1,5,8,17,2 2,3,4,6,7,1<br>0,21,23,24 8,19,22 | 4 P20766,P23739,P80299,Q80WL1                             |
| 6055 | 1,5,8,17,2 2,3,4,6,7,1<br>0,22,23,24 8,19,21 | 4 P20766,P23739,P80299,Q00715                             |
| 6056 | 1,5,8,17,2 2,3,4,6,7,1<br>1,22,23,24 8,19,20 | 4 P11598,P20766,P80299,Q80WL1                             |
| 6057 | 1,5,8,18,1 2,3,4,6,7,1<br>9,20,21,22 7,23,24 | 2 BOLT89,P01039                                           |

|      |                                              |                                      |
|------|----------------------------------------------|--------------------------------------|
| 6058 | 1,5,8,18,1 2,3,4,6,7,1<br>9,20,21,23 7,22,24 | 3 P01039,P23593,P23739               |
| 6059 | 1,5,8,18,1 2,3,4,6,7,1<br>9,20,21,24 7,22,23 | 3 BOLT89,P30120,P80299               |
| 6060 | 1,5,8,18,1 2,3,4,6,7,1<br>9,20,22,23 7,21,24 | 4 P01039,P04762,P23739,Q6AY61        |
| 6061 | 1,5,8,18,1 2,3,4,6,7,1<br>9,20,22,24 7,21,23 | 0                                    |
| 6062 | 1,5,8,18,1 2,3,4,6,7,1<br>9,20,23,24 7,21,22 | 3 P23739,P80299,Q9R168               |
| 6063 | 1,5,8,18,1 2,3,4,6,7,1<br>9,21,22,23 7,20,24 | 2 P01039,P19223                      |
| 6064 | 1,5,8,18,1 2,3,4,6,7,1<br>9,21,22,24 7,20,23 | 2 P19223,P55091                      |
| 6065 | 1,5,8,18,1 2,3,4,6,7,1<br>9,21,23,24 7,20,22 | 2 P19223,P80299                      |
| 6066 | 1,5,8,18,1 2,3,4,6,7,1<br>9,22,23,24 7,20,21 | 3 P00507,P19223,P55091               |
| 6067 | 1,5,8,18,2 2,3,4,6,7,1<br>0,21,22,23 7,19,24 | 2 P01039,P54921                      |
| 6068 | 1,5,8,18,2 2,3,4,6,7,1<br>0,21,22,24 7,19,23 | 1 P80299                             |
| 6069 | 1,5,8,18,2 2,3,4,6,7,1<br>0,21,23,24 7,19,22 | 2 P23739,P80299                      |
| 6070 | 1,5,8,18,2 2,3,4,6,7,1<br>0,22,23,24 7,19,21 | 3 P23739,Q5QE79,Q9WVK7               |
| 6071 | 1,5,8,18,2 2,3,4,6,7,1<br>1,22,23,24 7,19,20 | 2 P19223,P80299                      |
| 6072 | 1,5,8,19,2 2,3,4,6,7,1<br>0,21,22,23 7,18,24 | 5 P01039,P19218,P20766,P23739,Q99PP0 |
| 6073 | 1,5,8,19,2 2,3,4,6,7,1<br>0,21,22,24 7,18,23 | 3 O70594,P20766,Q99PP0               |
| 6074 | 1,5,8,19,2 2,3,4,6,7,1<br>0,21,23,24 7,18,22 | 3 P23739,Q80WL1,Q99PP0               |
| 6075 | 1,5,8,19,2 2,3,4,6,7,1<br>0,22,23,24 7,18,21 | 3 P23739,Q00715,Q9WVH8               |
| 6076 | 1,5,8,19,2 2,3,4,6,7,1<br>1,22,23,24 7,18,20 | 4 P19223,P55091,Q80WL1,Q8K1G0        |
| 6077 | 1,5,8,20,2 2,3,4,6,7,1<br>1,22,23,24 7,18,19 | 2 P20766,P23739                      |

|      |                               |                       |    |                                                                                                                                             |
|------|-------------------------------|-----------------------|----|---------------------------------------------------------------------------------------------------------------------------------------------|
| 6078 | 1,5,17,18,<br>19,20,21,2<br>2 | 2,3,4,6,7,8<br>,23,24 | 8  | BOLT89,P20761,P42854,P46844,Q05702,Q3ZAV1,Q63532,Q63598                                                                                     |
| 6079 | 1,5,17,18,<br>19,20,21,2<br>3 | 2,3,4,6,7,8<br>,22,24 | 8  | BOLT89,O70417,P20761,P23593,P30919,P35280,Q6P6R2,Q99041                                                                                     |
| 6080 | 1,5,17,18,<br>19,20,21,2<br>4 | 2,3,4,6,7,8<br>,22,23 | 13 | BOLT89,O54858,P02783,P20761,P20762,P23593,P35280,P42854,P50115,Q05702,Q63532,Q99041,Q99MH3                                                  |
| 6081 | 1,5,17,18,<br>19,20,22,2<br>3 | 2,3,4,6,7,8<br>,21,24 | 8  | P00714,P02625,P02631,P20761,P30919,Q05702,Q10743,Q6AYC4                                                                                     |
| 6082 | 1,5,17,18,<br>19,20,22,2<br>4 | 2,3,4,6,7,8<br>,21,23 | 8  | O70594,P02631,P09656,P20761,P42854,P50115,Q05702,Q63532                                                                                     |
| 6083 | 1,5,17,18,<br>19,20,23,2<br>4 | 2,3,4,6,7,8<br>,21,22 | 9  | P02625,P02631,P20761,P23593,P23739,P35280,Q05702,Q6AYC4,Q99041                                                                              |
| 6084 | 1,5,17,18,<br>19,21,22,2<br>3 | 2,3,4,6,7,8<br>,20,24 | 12 | D4A5U3,O70417,P00714,P02780,P06911,P11598,P12020,P20761,P22273,P50280,Q05702,Q4G075                                                         |
| 6085 | 1,5,17,18,<br>19,21,22,2<br>4 | 2,3,4,6,7,8<br>,20,23 | 13 | D4A5U3,O70417,P06911,P12020,P17559,P20761,P22273,P36376,P42854,P50280,Q05702,Q4G075,Q62894                                                  |
| 6086 | 1,5,17,18,<br>19,21,23,2<br>4 | 2,3,4,6,7,8<br>,20,22 | 14 | D4A5U3,O70417,P02780,P06911,P12020,P20761,P22273,P23593,P35280,P42854,P50280,Q05702,Q4G075,Q99041                                           |
| 6087 | 1,5,17,18,<br>19,22,23,2<br>4 | 2,3,4,6,7,8<br>,20,21 | 20 | D4A5U3,O55145,O70417,P00714,P02631,P02780,P06761,P06911,P11598,P12020,P22273,P22282,P42854,P50280,P62804,Q00715,Q05702,Q4G075,Q63617,Q9R0T3 |
| 6088 | 1,5,17,18,<br>20,21,22,2<br>3 | 2,3,4,6,7,8<br>,19,24 | 5  | O70417,P00714,P20761,P50115,Q05702                                                                                                          |
| 6089 | 1,5,17,18,<br>20,21,22,2<br>4 | 2,3,4,6,7,8<br>,19,23 | 6  | O70594,P20761,P42854,P50115,Q05702,Q63532                                                                                                   |
| 6090 | 1,5,17,18,<br>20,21,23,2<br>4 | 2,3,4,6,7,8<br>,19,22 | 6  | O70417,P20761,P35280,P42854,P50115,Q99041                                                                                                   |



|      |                               |                       |    |                                                                                                                               |
|------|-------------------------------|-----------------------|----|-------------------------------------------------------------------------------------------------------------------------------|
| 6091 | 1,5,17,18,<br>20,22,23,2<br>4 | 2,3,4,6,7,8<br>,19,21 | 12 | P00714,P02631,P11883,P20761,P22282,P42854,P50115,P62804,Q00715,Q05702,Q6AYC4,Q99041                                           |
| 6092 | 1,5,17,18,<br>21,22,23,2<br>4 | 2,3,4,6,7,8<br>,19,20 | 18 | D4A5U3,O70417,P00714,P02780,P06761,P06911,P11598,P12020,P22273,P22282,P42854,P50115,P50280,Q05702,Q4G075,Q63617,Q99041,Q9R0T3 |
| 6093 | 1,5,17,19,<br>20,21,22,2<br>3 | 2,3,4,6,7,8<br>,18,24 | 11 | O70417,P02625,P07151,P20761,P20762,P20766,P23593,P97615,Q05702,Q3ZAV1,Q63598                                                  |
| 6094 | 1,5,17,19,<br>20,21,22,2<br>4 | 2,3,4,6,7,8<br>,18,23 | 10 | B0LT89,O70594,P20761,P20762,P20766,P42854,Q05702,Q3ZAV1,Q63532,Q63598                                                         |
| 6095 | 1,5,17,19,<br>20,21,23,2<br>4 | 2,3,4,6,7,8<br>,18,22 | 10 | O70417,P02625,P20761,P20762,P20766,P23593,P23739,P35280,Q05702,Q99041                                                         |
| 6096 | 1,5,17,19,<br>20,22,23,2<br>4 | 2,3,4,6,7,8<br>,18,21 | 9  | O70594,P02625,P02631,P20761,P20766,P23739,Q00715,Q05702,Q9QZQ5                                                                |
| 6097 | 1,5,17,19,<br>21,22,23,2<br>4 | 2,3,4,6,7,8<br>,18,20 | 17 | D4A5U3,O55004,O70417,P02780,P06911,P11598,P12020,P17559,P20766,P22273,P50280,P97615,Q05702,Q4G075,Q5GRG2,Q80WL1,Q9QZQ5        |
| 6098 | 1,5,17,20,<br>21,22,23,2<br>4 | 2,3,4,6,7,8<br>,18,19 | 9  | O70417,P20761,P20766,P23739,P42854,P50115,P50280,P97615,Q05702                                                                |
| 6099 | 1,5,18,19,<br>20,21,22,2<br>3 | 2,3,4,6,7,8<br>,17,24 | 9  | O70417,O70594,P01039,P20761,P23593,P50115,Q05702,Q63598,Q99PP0                                                                |
| 6100 | 1,5,18,19,<br>20,21,22,2<br>4 | 2,3,4,6,7,8<br>,17,23 | 9  | O70417,O70594,P20761,P42854,P50115,Q05702,Q63532,Q63598,Q99PP0                                                                |
| 6101 | 1,5,18,19,<br>20,21,23,2<br>4 | 2,3,4,6,7,8<br>,17,22 | 7  | O70417,P20761,P23593,P35280,P50115,Q99041,Q99PP0                                                                              |
| 6102 | 1,5,18,19,<br>20,22,23,2<br>4 | 2,3,4,6,7,8<br>,17,21 | 13 | O70417,O70594,P00714,P02625,P02631,P20761,P26772,P50115,Q00715,Q05702,Q5QE79,Q99PP0,Q9QZQ5                                    |
| 6103 | 1,5,18,19,<br>21,22,23,2<br>4 | 2,3,4,6,7,8<br>,17,20 | 18 | D4A5U3,O70417,P02780,P06911,P12020,P13676,P17559,P19223,P22273,P50115,P50280,P55091,Q05702,Q4G075,Q5GRG2,Q62946,Q99PP0,Q9QZQ5 |

|      |                               |                         |    |                                                                                                                                                                                                                                   |
|------|-------------------------------|-------------------------|----|-----------------------------------------------------------------------------------------------------------------------------------------------------------------------------------------------------------------------------------|
| 6104 | 1,5,18,20,<br>21,22,23,2<br>4 | 2,3,4,6,7,8<br>,17,19   | 6  | O70417,O70594,P50115,Q05702,Q5QE79,Q99PP0                                                                                                                                                                                         |
| 6105 | 1,5,19,20,<br>21,22,23,2<br>4 | 2,3,4,6,7,8<br>,17,18   | 11 | O70417,O70594,P20766,P23593,P23739,P50115,P97615,Q05702,Q63598,Q99PP0,Q9QZQ5                                                                                                                                                      |
| 6106 | 1,6,7,8,17,<br>18,19,20       | 2,3,4,5,21,<br>22,23,24 | 16 | BOLT89,P06761,P06911,P12020,P13432,P21674,P22283,P30919,P31044,P36374,P47727,Q5GRG<br>2,Q9JI85,Q9QW07,Q9QX74,Q9WTT6                                                                                                               |
| 6107 | 1,6,7,8,17,<br>18,19,21       | 2,3,4,5,20,<br>22,23,24 | 6  | P05539,P13432,P21674,Q66H69,Q6P6R2,Q9QX74                                                                                                                                                                                         |
| 6108 | 1,6,7,8,17,<br>18,19,22       | 2,3,4,5,20,<br>21,23,24 | 2  | P13432,P70549                                                                                                                                                                                                                     |
| 6109 | 1,6,7,8,17,<br>18,19,23       | 2,3,4,5,20,<br>21,22,24 | 2  | P21674,P70549                                                                                                                                                                                                                     |
| 6110 | 1,6,7,8,17,<br>18,19,24       | 2,3,4,5,20,<br>21,22,23 | 2  | P13432,P70549                                                                                                                                                                                                                     |
| 6111 | 1,6,7,8,17,<br>18,20,21       | 2,3,4,5,19,<br>22,23,24 | 17 | P00507,P05539,P06911,P12020,P13432,P19629,P22283,P35745,P47727,Q5GRG2,Q6P6R2,Q78P<br>75,Q812E4,Q9JHB9,Q9QW07,Q9QX74,Q9WTT6                                                                                                        |
| 6112 | 1,6,7,8,17,<br>18,20,22       | 2,3,4,5,19,<br>21,23,24 | 5  | P06911,P12020,P13432,P35745,Q5GRG2                                                                                                                                                                                                |
| 6113 | 1,6,7,8,17,<br>18,20,23       | 2,3,4,5,19,<br>21,22,24 | 7  | P06911,P12020,P13432,P21674,P30919,P35745,Q5GRG2                                                                                                                                                                                  |
| 6114 | 1,6,7,8,17,<br>18,20,24       | 2,3,4,5,19,<br>21,22,23 | 9  | P06911,P08723,P12020,P13432,P35745,P47727,Q5GRG2,Q9JHB9,Q9QW07                                                                                                                                                                    |
| 6115 | 1,6,7,8,17,<br>18,21,22       | 2,3,4,5,19,<br>20,23,24 | 3  | P05539,P35745,Q9QX74                                                                                                                                                                                                              |
| 6116 | 1,6,7,8,17,<br>18,21,23       | 2,3,4,5,19,<br>20,22,24 | 3  | P21674,P35745,Q9QX74                                                                                                                                                                                                              |
| 6117 | 1,6,7,8,17,<br>18,21,24       | 2,3,4,5,19,<br>20,22,23 | 3  | P05539,P13432,Q63474                                                                                                                                                                                                              |
| 6118 | 1,6,7,8,17,<br>18,22,23       | 2,3,4,5,19,<br>20,21,24 | 0  |                                                                                                                                                                                                                                   |
| 6119 | 1,6,7,8,17,<br>18,22,24       | 2,3,4,5,19,<br>20,21,23 | 2  | P13432,P70549                                                                                                                                                                                                                     |
| 6120 | 1,6,7,8,17,<br>18,23,24       | 2,3,4,5,19,<br>20,21,22 | 1  | P70549                                                                                                                                                                                                                            |
| 6121 | 1,6,7,8,17,<br>19,20,21       | 2,3,4,5,18,<br>22,23,24 | 29 | BOLT89,iRT-<br>Kit_WR_fusion,O35547,P04905,P05539,P06761,P06911,P08723,P09456,P13676,P19629,P21674,<br>P22283,P24368,P30120,P36374,P46462,P47727,Q5GRG2,Q63493,Q63617,Q6P6R2,Q812E4,Q9J<br>HB9,Q9JI85,Q9QW07,Q9QX74,Q9WTT6,Q9Z2L0 |

|      |                                              |    |                                                                                                                                      |
|------|----------------------------------------------|----|--------------------------------------------------------------------------------------------------------------------------------------|
| 6122 | 1,6,7,8,17, 2,3,4,5,18,<br>19,20,22 21,23,24 | 8  | O89117,P06911,P12020,P70549,Q5GRG2,Q9QW07,Q9QZK9,Q9WTT6                                                                              |
| 6123 | 1,6,7,8,17, 2,3,4,5,18,<br>19,20,23 21,22,24 | 8  | O89117,P06911,P21674,P70549,Q5GRG2,Q812E4,Q9QW07,Q9WTT6                                                                              |
| 6124 | 1,6,7,8,17, 2,3,4,5,18,<br>19,20,24 21,22,23 | 19 | O89117,P06911,P08723,P09456,P22283,P30120,P36374,P46462,P47727,P60905,P70549,Q5GRG2,Q63617,Q812E4,Q9JHB9,Q9JI85,Q9QW07,Q9WTT6,Q9Z2L0 |
| 6125 | 1,6,7,8,17, 2,3,4,5,18,<br>19,21,22 20,23,24 | 3  | P05539,P21674,Q9QX74                                                                                                                 |
| 6126 | 1,6,7,8,17, 2,3,4,5,18,<br>19,21,23 20,22,24 | 3  | P21674,Q63474,Q9QX74                                                                                                                 |
| 6127 | 1,6,7,8,17, 2,3,4,5,18,<br>19,21,24 20,22,23 | 6  | P02782,P05539,P08723,Q63474,Q9QX74,Q9Z2L0                                                                                            |
| 6128 | 1,6,7,8,17, 2,3,4,5,18,<br>19,22,23 20,21,24 | 3  | O89117,P21674,P70549                                                                                                                 |
| 6129 | 1,6,7,8,17, 2,3,4,5,18,<br>19,22,24 20,21,23 | 2  | O89117,P70549                                                                                                                        |
| 6130 | 1,6,7,8,17, 2,3,4,5,18,<br>19,23,24 20,21,22 | 2  | P21674,P70549                                                                                                                        |
| 6131 | 1,6,7,8,17, 2,3,4,5,18,<br>20,21,22 19,23,24 | 6  | P05539,P06911,P19629,P35745,Q5GRG2,Q9WTT6                                                                                            |
| 6132 | 1,6,7,8,17, 2,3,4,5,18,<br>20,21,23 19,22,24 | 7  | P06911,P19629,P21674,P35745,Q5GRG2,Q812E4,Q9WTT6                                                                                     |
| 6133 | 1,6,7,8,17, 2,3,4,5,18,<br>20,21,24 19,22,23 | 17 | P02782,P05539,P06911,P08723,P09456,P22283,P30120,P35745,P47727,Q5GRG2,Q63474,Q6AYR9,Q78P75,Q812E4,Q9JHB9,Q9QW07,Q9Z2L0               |
| 6134 | 1,6,7,8,17, 2,3,4,5,18,<br>20,22,23 19,21,24 | 5  | O89117,P06911,P19629,P35745,Q5GRG2                                                                                                   |
| 6135 | 1,6,7,8,17, 2,3,4,5,18,<br>20,22,24 19,21,23 | 9  | O89117,P06911,P08723,P12020,P22006,P35745,Q5GRG2,Q9JHB9,Q9QW07                                                                       |
| 6136 | 1,6,7,8,17, 2,3,4,5,18,<br>20,23,24 19,21,22 | 5  | P06911,P35745,Q5GRG2,Q812E4,Q9QW07                                                                                                   |
| 6137 | 1,6,7,8,17, 2,3,4,5,18,<br>21,22,23 19,20,24 | 2  | P21674,P35745                                                                                                                        |
| 6138 | 1,6,7,8,17, 2,3,4,5,18,<br>21,22,24 19,20,23 | 3  | P05539,P35745,Q63474                                                                                                                 |
| 6139 | 1,6,7,8,17, 2,3,4,5,18,<br>21,23,24 19,20,22 | 2  | P35745,Q63474                                                                                                                        |
| 6140 | 1,6,7,8,17, 2,3,4,5,18,<br>22,23,24 19,20,21 | 3  | P35745,P47967,P70549                                                                                                                 |
| 6141 | 1,6,7,8,18, 2,3,4,5,17,<br>19,20,21 22,23,24 | 19 | B0LT89,O08815,P04905,P06761,P08723,P19629,P22283,P24368,P31044,P46462,P47727,Q5GRG2,Q5PQL7,Q63493,Q63617,Q812E4,Q9JI85,Q9QW07,Q9WTT6 |

|      |                                              |                                                                                                              |
|------|----------------------------------------------|--------------------------------------------------------------------------------------------------------------|
| 6142 | 1,6,7,8,18, 2,3,4,5,17,<br>19,20,22 21,23,24 | 5 P06911,P12020,Q5GRG2,Q5PQL7,Q9QW07                                                                         |
| 6143 | 1,6,7,8,18, 2,3,4,5,17,<br>19,20,23 21,22,24 | 5 P19629,P21674,P31044,Q812E4,Q9QW07                                                                         |
| 6144 | 1,6,7,8,18, 2,3,4,5,17,<br>19,20,24 21,22,23 | 11 P06911,P08723,P12020,P22283,P47727,P70549,Q5GRG2,Q63617,Q812E4,Q9JHB9,Q9QW07                              |
| 6145 | 1,6,7,8,18, 2,3,4,5,17,<br>19,21,22 20,23,24 | 1 Q5PQL7                                                                                                     |
| 6146 | 1,6,7,8,18, 2,3,4,5,17,<br>19,21,23 20,22,24 | 1 P21674                                                                                                     |
| 6147 | 1,6,7,8,18, 2,3,4,5,17,<br>19,21,24 20,22,23 | 2 P22283,P36376                                                                                              |
| 6148 | 1,6,7,8,18, 2,3,4,5,17,<br>19,22,23 20,21,24 | 3 P19223,P70549,Q6AY61                                                                                       |
| 6149 | 1,6,7,8,18, 2,3,4,5,17,<br>19,22,24 20,21,23 | 2 P19223,P70549                                                                                              |
| 6150 | 1,6,7,8,18, 2,3,4,5,17,<br>19,23,24 20,21,22 | 2 P19223,P70549                                                                                              |
| 6151 | 1,6,7,8,18, 2,3,4,5,17,<br>20,21,22 19,23,24 | 8 P06911,P12020,P19629,P22283,P35745,Q5GRG2,Q5PQL7,Q9QW07                                                    |
| 6152 | 1,6,7,8,18, 2,3,4,5,17,<br>20,21,23 19,22,24 | 4 P19629,P35745,Q812E4,Q9QW07                                                                                |
| 6153 | 1,6,7,8,18, 2,3,4,5,17,<br>20,21,24 19,22,23 | 12 P02782,P06911,P08723,P19629,P22283,P30120,P47727,Q5GRG2,Q63617,Q812E4,Q9JHB9,Q9QW07                       |
| 6154 | 1,6,7,8,18, 2,3,4,5,17,<br>20,22,23 19,21,24 | 7 P06911,P12020,P19629,P54921,Q6AY61,Q9QW07,Q9WVK7                                                           |
| 6155 | 1,6,7,8,18, 2,3,4,5,17,<br>20,22,24 19,21,23 | 7 P06911,P12020,P22006,Q5GRG2,Q9JHB9,Q9QW07,Q9WVK7                                                           |
| 6156 | 1,6,7,8,18, 2,3,4,5,17,<br>20,23,24 19,21,22 | 4 P06911,Q812E4,Q9QW07,Q9WVK7                                                                                |
| 6157 | 1,6,7,8,18, 2,3,4,5,17,<br>21,22,23 19,20,24 | 1 P54921                                                                                                     |
| 6158 | 1,6,7,8,18, 2,3,4,5,17,<br>21,22,24 19,20,23 | 0                                                                                                            |
| 6159 | 1,6,7,8,18, 2,3,4,5,17,<br>21,23,24 19,20,22 | 0                                                                                                            |
| 6160 | 1,6,7,8,18, 2,3,4,5,17,<br>22,23,24 19,20,21 | 4 P19223,P29315,P70549,Q9WVK7                                                                                |
| 6161 | 1,6,7,8,19, 2,3,4,5,17,<br>20,21,22 18,23,24 | iRT-<br>13 Kit_WR_fusion,P08723,P19218,P19629,P22283,P46462,Q5PQL7,Q63493,Q63617,Q812E4,Q9J185,Q9QW07,Q9WTT6 |

|      |                                              |                                                                                                                                                                                                                       |
|------|----------------------------------------------|-----------------------------------------------------------------------------------------------------------------------------------------------------------------------------------------------------------------------|
| 6162 | 1,6,7,8,19, 2,3,4,5,17,<br>20,21,23 18,22,24 | 10 iRT-Kit_WR_fusion,P19629,P21674,P22283,Q63493,Q63617,Q812E4,Q9JI85,Q9QW07,Q9WTT6<br>iRT-                                                                                                                           |
| 6163 | 1,6,7,8,19, 2,3,4,5,17,<br>20,21,24 18,22,23 | 28 Kit_WR_fusion,O08815,O35547,P02781,P02782,P06761,P08723,P09456,P0C0A9,P19629,P22283<br>,P24368,P30120,P36374,P46462,P47727,P60905,Q5M8C6,Q63474,Q63493,Q63617,Q6AYR9,Q8<br>12E4,Q9JHB9,Q9JI85,Q9QW07,Q9WUC4,Q9Z2L0 |
| 6164 | 1,6,7,8,19, 2,3,4,5,17,<br>20,22,23 18,21,24 | 3 P19218,P19629,Q9QW07                                                                                                                                                                                                |
| 6165 | 1,6,7,8,19, 2,3,4,5,17,<br>20,22,24 18,21,23 | 8 P08723,P22006,P70549,Q63617,Q812E4,Q9JHB9,Q9QW07,Q9QZK9                                                                                                                                                             |
| 6166 | 1,6,7,8,19, 2,3,4,5,17,<br>20,23,24 18,21,22 | 4 P08723,P70549,Q812E4,Q9QW07                                                                                                                                                                                         |
| 6167 | 1,6,7,8,19, 2,3,4,5,17,<br>21,22,23 18,20,24 | 2 iRT-Kit_WR_fusion,P21674                                                                                                                                                                                            |
| 6168 | 1,6,7,8,19, 2,3,4,5,17,<br>21,22,24 18,20,23 | 0                                                                                                                                                                                                                     |
| 6169 | 1,6,7,8,19, 2,3,4,5,17,<br>21,23,24 18,20,22 | 1 Q63474                                                                                                                                                                                                              |
| 6170 | 1,6,7,8,19, 2,3,4,5,17,<br>22,23,24 18,20,21 | 3 P19223,P70549,Q811M5                                                                                                                                                                                                |
| 6171 | 1,6,7,8,20, 2,3,4,5,17,<br>21,22,23 18,19,24 | 4 P19629,P35745,Q812E4,Q9QW07                                                                                                                                                                                         |
| 6172 | 1,6,7,8,20, 2,3,4,5,17,<br>21,22,24 18,19,23 | 11 P01835,P02782,P08723,P19629,P22283,P30120,P35745,Q6AYR9,Q812E4,Q9JHB9,Q9QW07                                                                                                                                       |
| 6173 | 1,6,7,8,20, 2,3,4,5,17,<br>21,23,24 18,19,22 | 9 P01835,P08723,P19629,P35745,Q63474,Q6AYR9,Q812E4,Q9JHB9,Q9QW07                                                                                                                                                      |
| 6174 | 1,6,7,8,20, 2,3,4,5,17,<br>22,23,24 18,19,21 | 5 P22006,P35745,Q812E4,Q9QW07,Q9WVK7                                                                                                                                                                                  |
| 6175 | 1,6,7,8,21, 2,3,4,5,17,<br>22,23,24 18,19,20 | 2 Q62714,Q63474                                                                                                                                                                                                       |
| 6176 | 1,6,7,17,1 2,3,4,5,8,2<br>8,19,20,21 2,23,24 | 8 BOLT89,P05539,P20761,P22283,P30919,Q5PQL7,Q63617,Q6P6R2                                                                                                                                                             |
| 6177 | 1,6,7,17,1 2,3,4,5,8,2<br>8,19,20,22 1,23,24 | 6 O89117,P00762,P20761,P30919,P70549,Q5PQL7                                                                                                                                                                           |
| 6178 | 1,6,7,17,1 2,3,4,5,8,2<br>8,19,20,23 1,22,24 | 5 P00762,P21674,P30919,P70549,Q10743                                                                                                                                                                                  |
| 6179 | 1,6,7,17,1 2,3,4,5,8,2<br>8,19,20,24 1,22,23 | 2 P30919,P70549                                                                                                                                                                                                       |
| 6180 | 1,6,7,17,1 2,3,4,5,8,2<br>8,19,21,22 0,23,24 | 5 P00762,P05539,P23739,P36376,Q5PQL7                                                                                                                                                                                  |

|      |                                              |                                                                  |
|------|----------------------------------------------|------------------------------------------------------------------|
| 6181 | 1,6,7,17,1 2,3,4,5,8,2<br>8,19,21,23 0,22,24 | 3 P05539,P21674,Q10743                                           |
| 6182 | 1,6,7,17,1 2,3,4,5,8,2<br>8,19,21,24 0,22,23 | 4 P05539,P36376,P70549,Q9Z2L0                                    |
| 6183 | 1,6,7,17,1 2,3,4,5,8,2<br>8,19,22,23 0,21,24 | 3 P00762,P70549,Q10743                                           |
| 6184 | 1,6,7,17,1 2,3,4,5,8,2<br>8,19,22,24 0,21,23 | 3 P00762,P36376,P70549                                           |
| 6185 | 1,6,7,17,1 2,3,4,5,8,2<br>8,19,23,24 0,21,22 | 3 P00762,P70549,Q10743                                           |
| 6186 | 1,6,7,17,1 2,3,4,5,8,1<br>8,20,21,22 9,23,24 | 3 P01835,P05539,Q5PQL7                                           |
| 6187 | 1,6,7,17,1 2,3,4,5,8,1<br>8,20,21,23 9,22,24 | 3 P01835,P05539,P30919                                           |
| 6188 | 1,6,7,17,1 2,3,4,5,8,1<br>8,20,21,24 9,22,23 | 4 P00507,P01835,P05539,Q9Z2L0                                    |
| 6189 | 1,6,7,17,1 2,3,4,5,8,1<br>8,20,22,23 9,21,24 | 2 P30919,Q10743                                                  |
| 6190 | 1,6,7,17,1 2,3,4,5,8,1<br>8,20,22,24 9,21,23 | 2 P22006,P70549                                                  |
| 6191 | 1,6,7,17,1 2,3,4,5,8,1<br>8,20,23,24 9,21,22 | 2 P30919,P70549                                                  |
| 6192 | 1,6,7,17,1 2,3,4,5,8,1<br>8,21,22,23 9,20,24 | 1 P05539                                                         |
| 6193 | 1,6,7,17,1 2,3,4,5,8,1<br>8,21,22,24 9,20,23 | 3 P05539,P23739,P36376                                           |
| 6194 | 1,6,7,17,1 2,3,4,5,8,1<br>8,21,23,24 9,20,22 | 1 P05539                                                         |
| 6195 | 1,6,7,17,1 2,3,4,5,8,1<br>8,22,23,24 9,20,21 | 6 D4A5U3,P00762,P47967,P70549,Q5I0D1,Q64268                      |
| 6196 | 1,6,7,17,1 2,3,4,5,8,1<br>9,20,21,22 8,23,24 | 7 B0LT89,O89117,P05539,P20762,P22283,Q5PQL7,Q63617               |
| 6197 | 1,6,7,17,1 2,3,4,5,8,1<br>9,20,21,23 8,22,24 | 3 P05539,P21674,Q6P6R2                                           |
| 6198 | 1,6,7,17,1 2,3,4,5,8,1<br>9,20,21,24 8,22,23 | 9 B0LT89,O35547,P05539,P08723,P20762,P22283,P36374,Q63617,Q9Z2L0 |
| 6199 | 1,6,7,17,1 2,3,4,5,8,1<br>9,20,22,23 8,21,24 | 3 O89117,P02625,P70549                                           |
| 6200 | 1,6,7,17,1 2,3,4,5,8,1<br>9,20,22,24 8,21,23 | 3 O89117,P22006,P70549                                           |

|      |                                              |                                                                  |
|------|----------------------------------------------|------------------------------------------------------------------|
| 6201 | 1,6,7,17,1 2,3,4,5,8,1<br>9,20,23,24 8,21,22 | 1 P70549                                                         |
| 6202 | 1,6,7,17,1 2,3,4,5,8,1<br>9,21,22,23 8,20,24 | 3 P05539,P21674,Q9R168                                           |
| 6203 | 1,6,7,17,1 2,3,4,5,8,1<br>9,21,22,24 8,20,23 | 5 P05539,P36376,P70549,Q9R168,Q9Z2L0                             |
| 6204 | 1,6,7,17,1 2,3,4,5,8,1<br>9,21,23,24 8,20,22 | 3 P05539,P70549,Q63474                                           |
| 6205 | 1,6,7,17,1 2,3,4,5,8,1<br>9,22,23,24 8,20,21 | 5 D4A5U3,P00762,P25809,P70549,Q811M5                             |
| 6206 | 1,6,7,17,2 2,3,4,5,8,1<br>0,21,22,23 8,19,24 | 2 P01835,P05539                                                  |
| 6207 | 1,6,7,17,2 2,3,4,5,8,1<br>0,21,22,24 8,19,23 | 4 P01835,P05539,P20762,Q9Z2L0                                    |
| 6208 | 1,6,7,17,2 2,3,4,5,8,1<br>0,21,23,24 8,19,22 | 2 P01835,P05539                                                  |
| 6209 | 1,6,7,17,2 2,3,4,5,8,1<br>0,22,23,24 8,19,21 | 2 P22006,P70549                                                  |
| 6210 | 1,6,7,17,2 2,3,4,5,8,1<br>1,22,23,24 8,19,20 | 3 P01835,P05539,Q9R168                                           |
| 6211 | 1,6,7,18,1 2,3,4,5,8,1<br>9,20,21,22 7,23,24 | 4 P22283,P36376,Q5PQL7,Q63617                                    |
| 6212 | 1,6,7,18,1 2,3,4,5,8,1<br>9,20,21,23 7,22,24 | 2 P23593,Q63617                                                  |
| 6213 | 1,6,7,18,1 2,3,4,5,8,1<br>9,20,21,24 7,22,23 | 8 O08815,O35547,P01835,P22283,P36376,Q5PQL7,Q63617,Q9QW07        |
| 6214 | 1,6,7,18,1 2,3,4,5,8,1<br>9,20,22,23 7,21,24 | 1 P70549                                                         |
| 6215 | 1,6,7,18,1 2,3,4,5,8,1<br>9,20,22,24 7,21,23 | 5 P22006,P36376,P70549,Q5PQL7,Q9QW07                             |
| 6216 | 1,6,7,18,1 2,3,4,5,8,1<br>9,20,23,24 7,21,22 | 1 P70549                                                         |
| 6217 | 1,6,7,18,1 2,3,4,5,8,1<br>9,21,22,23 7,20,24 | 1 D4A5U3                                                         |
| 6218 | 1,6,7,18,1 2,3,4,5,8,1<br>9,21,22,24 7,20,23 | 5 D4A5U3,P19223,P23739,P36376,Q5PQL7                             |
| 6219 | 1,6,7,18,1 2,3,4,5,8,1<br>9,21,23,24 7,20,22 | 3 D4A5U3,P19223,P36376                                           |
| 6220 | 1,6,7,18,1 2,3,4,5,8,1<br>9,22,23,24 7,20,21 | 9 D4A5U3,P00762,P13676,P19223,P22006,P25809,P36375,P70549,Q811M5 |

|      |                                              |                                                           |
|------|----------------------------------------------|-----------------------------------------------------------|
| 6221 | 1,6,7,18,2 2,3,4,5,8,1<br>0,21,22,23 7,19,24 | 1 P01835                                                  |
| 6222 | 1,6,7,18,2 2,3,4,5,8,1<br>0,21,22,24 7,19,23 | 4 P01835,P22006,P36376,Q5PQL7                             |
| 6223 | 1,6,7,18,2 2,3,4,5,8,1<br>0,21,23,24 7,19,22 | 1 P01835                                                  |
| 6224 | 1,6,7,18,2 2,3,4,5,8,1<br>0,22,23,24 7,19,21 | 3 P01835,P22006,Q9WVK7                                    |
| 6225 | 1,6,7,18,2 2,3,4,5,8,1<br>1,22,23,24 7,19,20 | 5 D4A5U3,P01835,P13676,P19223,P36376                      |
| 6226 | 1,6,7,19,2 2,3,4,5,8,1<br>0,21,22,23 7,18,24 | 1 P01835                                                  |
| 6227 | 1,6,7,19,2 2,3,4,5,8,1<br>0,21,22,24 7,18,23 | 8 O35547,O70594,P01835,P22006,P22283,P36376,Q5PQL7,Q63617 |
| 6228 | 1,6,7,19,2 2,3,4,5,8,1<br>0,21,23,24 7,18,22 | 3 O35547,P01835,Q63617                                    |
| 6229 | 1,6,7,19,2 2,3,4,5,8,1<br>0,22,23,24 7,18,21 | 3 P22006,P70549,Q811M5                                    |
| 6230 | 1,6,7,19,2 2,3,4,5,8,1<br>1,22,23,24 7,18,20 | 7 D4A5U3,P01835,P19223,P25809,P36376,P70549,Q811M5        |
| 6231 | 1,6,7,20,2 2,3,4,5,8,1<br>1,22,23,24 7,18,19 | 2 P01835,P22006                                           |
| 6232 | 1,6,8,17,1 2,3,4,5,7,2<br>8,19,20,21 2,23,24 | 6 BOLT89,P13432,P30120,P47727,Q6P6R2,Q9JI85               |
| 6233 | 1,6,8,17,1 2,3,4,5,7,2<br>8,19,20,22 1,23,24 | 6 BOLT89,O89117,P08649,P13432,P47727,P70549               |
| 6234 | 1,6,8,17,1 2,3,4,5,7,2<br>8,19,20,23 1,22,24 | 6 BOLT89,P08649,P13432,P21674,P30919,P70549               |
| 6235 | 1,6,8,17,1 2,3,4,5,7,2<br>8,19,20,24 1,22,23 | 7 BOLT89,P08649,P13432,P47727,P60905,P70549,Q9QW07        |
| 6236 | 1,6,8,17,1 2,3,4,5,7,2<br>8,19,21,22 0,23,24 | 1 P08649                                                  |
| 6237 | 1,6,8,17,1 2,3,4,5,7,2<br>8,19,21,23 0,22,24 | 1 P21674                                                  |
| 6238 | 1,6,8,17,1 2,3,4,5,7,2<br>8,19,21,24 0,22,23 | 1 P70549                                                  |
| 6239 | 1,6,8,17,1 2,3,4,5,7,2<br>8,19,22,23 0,21,24 | 4 P08649,P47967,P70549,Q6AY61                             |
| 6240 | 1,6,8,17,1 2,3,4,5,7,2<br>8,19,22,24 0,21,23 | 3 P08649,P47967,P70549                                    |



|      |                                              |                                                                                                                 |
|------|----------------------------------------------|-----------------------------------------------------------------------------------------------------------------|
| 6241 | 1,6,8,17,1 2,3,4,5,7,2<br>8,19,23,24 0,21,22 | 4 P08649,P47967,P70549,P97840                                                                                   |
| 6242 | 1,6,8,17,1 2,3,4,5,7,1<br>8,20,21,22 9,23,24 | 1 P13432                                                                                                        |
| 6243 | 1,6,8,17,1 2,3,4,5,7,1<br>8,20,21,23 9,22,24 | 0                                                                                                               |
| 6244 | 1,6,8,17,1 2,3,4,5,7,1<br>8,20,21,24 9,22,23 | 4 P13432,P30120,P47727,Q9Z2L0                                                                                   |
| 6245 | 1,6,8,17,1 2,3,4,5,7,1<br>8,20,22,23 9,21,24 | 2 P08649,Q6AY61                                                                                                 |
| 6246 | 1,6,8,17,1 2,3,4,5,7,1<br>8,20,22,24 9,21,23 | 4 P08649,P13432,P22006,P70549                                                                                   |
| 6247 | 1,6,8,17,1 2,3,4,5,7,1<br>8,20,23,24 9,21,22 | 2 P13432,P70549                                                                                                 |
| 6248 | 1,6,8,17,1 2,3,4,5,7,1<br>8,21,22,23 9,20,24 | 1 P68511                                                                                                        |
| 6249 | 1,6,8,17,1 2,3,4,5,7,1<br>8,21,22,24 9,20,23 | 1 P10758                                                                                                        |
| 6250 | 1,6,8,17,1 2,3,4,5,7,1<br>8,21,23,24 9,20,22 | 1 P47967                                                                                                        |
| 6251 | 1,6,8,17,1 2,3,4,5,7,1<br>8,22,23,24 9,20,21 | 4 P47967,P70549,P97840,Q5I0D1                                                                                   |
| 6252 | 1,6,8,17,1 2,3,4,5,7,1<br>9,20,21,22 8,23,24 | 5 B0LT89,O89117,P20766,Q5PQL7,Q6P6R2                                                                            |
| 6253 | 1,6,8,17,1 2,3,4,5,7,1<br>9,20,21,23 8,22,24 | 4 B0LT89,P08753,P21674,Q6P6R2                                                                                   |
| 6254 | 1,6,8,17,1 2,3,4,5,7,1<br>9,20,21,24 8,22,23 | 15 B0LT89,O35547,P02782,P08723,P09456,P24368,P30120,P36374,P47727,P60905,Q6P6R2,Q812E<br>4,Q9JI85,Q9QW07,Q9Z2L0 |
| 6255 | 1,6,8,17,1 2,3,4,5,7,1<br>9,20,22,23 8,21,24 | 2 O89117,P70549                                                                                                 |
| 6256 | 1,6,8,17,1 2,3,4,5,7,1<br>9,20,22,24 8,21,23 | 4 B0LT89,O89117,P22006,P70549                                                                                   |
| 6257 | 1,6,8,17,1 2,3,4,5,7,1<br>9,20,23,24 8,21,22 | 2 O89117,P70549                                                                                                 |
| 6258 | 1,6,8,17,1 2,3,4,5,7,1<br>9,21,22,23 8,20,24 | 1 P21674                                                                                                        |
| 6259 | 1,6,8,17,1 2,3,4,5,7,1<br>9,21,22,24 8,20,23 | 1 P70549                                                                                                        |
| 6260 | 1,6,8,17,1 2,3,4,5,7,1<br>9,21,23,24 8,20,22 | 3 P70549,P97840,Q63474                                                                                          |

|      |                                              |                                                                                 |
|------|----------------------------------------------|---------------------------------------------------------------------------------|
| 6261 | 1,6,8,17,1 2,3,4,5,7,1<br>9,22,23,24 8,20,21 | 7 O89117,P00507,P47967,P70549,P97840,Q5I0D1,Q811M5                              |
| 6262 | 1,6,8,17,2 2,3,4,5,7,1<br>0,21,22,23 8,19,24 | 2 P20766,P63029                                                                 |
| 6263 | 1,6,8,17,2 2,3,4,5,7,1<br>0,21,22,24 8,19,23 | 3 P20766,P30120,Q9Z2L0                                                          |
| 6264 | 1,6,8,17,2 2,3,4,5,7,1<br>0,21,23,24 8,19,22 | 0                                                                               |
| 6265 | 1,6,8,17,2 2,3,4,5,7,1<br>0,22,23,24 8,19,21 | 5 O89117,P22006,P47967,P70549,P97840                                            |
| 6266 | 1,6,8,17,2 2,3,4,5,7,1<br>1,22,23,24 8,19,20 | 3 P47967,P97840,Q5I0D1                                                          |
| 6267 | 1,6,8,18,1 2,3,4,5,7,1<br>9,20,21,22 7,23,24 | 3 B0LT89,Q5PQL7,Q9QW07                                                          |
| 6268 | 1,6,8,18,1 2,3,4,5,7,1<br>9,20,21,23 7,22,24 | 1 B0LT89                                                                        |
| 6269 | 1,6,8,18,1 2,3,4,5,7,1<br>9,20,21,24 7,22,23 | 11 B0LT89,O08815,O35547,P08723,P30120,P47727,P60905,Q68G31,Q812E4,Q9JI85,Q9QW07 |
| 6270 | 1,6,8,18,1 2,3,4,5,7,1<br>9,20,22,23 7,21,24 | 4 P01039,P36860,P70549,Q6AY61                                                   |
| 6271 | 1,6,8,18,1 2,3,4,5,7,1<br>9,20,22,24 7,21,23 | 3 P22006,P70549,Q9QW07                                                          |
| 6272 | 1,6,8,18,1 2,3,4,5,7,1<br>9,20,23,24 7,21,22 | 3 P70549,Q9QW07,Q9R168                                                          |
| 6273 | 1,6,8,18,1 2,3,4,5,7,1<br>9,21,22,23 7,20,24 | 2 P19223,Q6AY61                                                                 |
| 6274 | 1,6,8,18,1 2,3,4,5,7,1<br>9,21,22,24 7,20,23 | 1 P19223                                                                        |
| 6275 | 1,6,8,18,1 2,3,4,5,7,1<br>9,21,23,24 7,20,22 | 2 P19223,P70549                                                                 |
| 6276 | 1,6,8,18,1 2,3,4,5,7,1<br>9,22,23,24 7,20,21 | 6 P00507,P19223,P47967,P70549,Q6AY61,Q811M5                                     |
| 6277 | 1,6,8,18,2 2,3,4,5,7,1<br>0,21,22,23 7,19,24 | 2 P54921,Q6AY61                                                                 |
| 6278 | 1,6,8,18,2 2,3,4,5,7,1<br>0,21,22,24 7,19,23 | 2 P22006,Q9QW07                                                                 |
| 6279 | 1,6,8,18,2 2,3,4,5,7,1<br>0,21,23,24 7,19,22 | 1 Q9QW07                                                                        |
| 6280 | 1,6,8,18,2 2,3,4,5,7,1<br>0,22,23,24 7,19,21 | 4 P22006,Q5QE79,Q6AY61,Q9WVK7                                                   |

|      |                               |                        |   |                                                         |
|------|-------------------------------|------------------------|---|---------------------------------------------------------|
| 6281 | 1,6,8,18,2<br>1,22,23,24      | 2,3,4,5,7,1<br>7,19,20 | 2 | P19223,P20646                                           |
| 6282 | 1,6,8,19,2<br>0,21,22,23      | 2,3,4,5,7,1<br>7,18,24 | 1 | P20766                                                  |
| 6283 | 1,6,8,19,2<br>0,21,22,24      | 2,3,4,5,7,1<br>7,18,23 | 6 | BOLT89,O35547,O70594,P08723,P30120,Q9QW07               |
| 6284 | 1,6,8,19,2<br>0,21,23,24      | 2,3,4,5,7,1<br>7,18,22 | 3 | O35547,Q812E4,Q9QW07                                    |
| 6285 | 1,6,8,19,2<br>0,22,23,24      | 2,3,4,5,7,1<br>7,18,21 | 4 | P22006,P70549,Q811M5,Q9QW07                             |
| 6286 | 1,6,8,19,2<br>1,22,23,24      | 2,3,4,5,7,1<br>7,18,20 | 3 | P19223,P70549,Q811M5                                    |
| 6287 | 1,6,8,20,2<br>1,22,23,24      | 2,3,4,5,7,1<br>7,18,19 | 1 | P20766                                                  |
| 6288 | 1,6,17,18,<br>19,20,21,2<br>2 | 2,3,4,5,7,8<br>,23,24  | 6 | BOLT89,P05539,P20761,P20762,Q5PQL7,Q6P6R2               |
| 6289 | 1,6,17,18,<br>19,20,21,2<br>3 | 2,3,4,5,7,8<br>,22,24  | 4 | BOLT89,P23593,P35280,Q6P6R2                             |
| 6290 | 1,6,17,18,<br>19,20,21,2<br>4 | 2,3,4,5,7,8<br>,22,23  | 8 | BOLT89,P05539,P20761,P20762,P23593,P27590,P35280,Q9Z2L0 |
| 6291 | 1,6,17,18,<br>19,20,22,2<br>3 | 2,3,4,5,7,8<br>,21,24  | 5 | O89117,P02625,P11883,P30919,P70549                      |
| 6292 | 1,6,17,18,<br>19,20,22,2<br>4 | 2,3,4,5,7,8<br>,21,23  | 7 | BOLT89,O70594,O89117,P11883,P20761,P22006,P70549        |
| 6293 | 1,6,17,18,<br>19,20,23,2<br>4 | 2,3,4,5,7,8<br>,21,22  | 3 | P11883,P35280,P70549                                    |
| 6294 | 1,6,17,18,<br>19,21,22,2<br>3 | 2,3,4,5,7,8<br>,20,24  | 4 | D4A5U3,P70549,P82471,Q4G075                             |
| 6295 | 1,6,17,18,<br>19,21,22,2<br>4 | 2,3,4,5,7,8<br>,20,23  | 6 | D4A5U3,P05539,P20761,P36376,P70549,Q4G075               |
| 6296 | 1,6,17,18,<br>19,21,23,2<br>4 | 2,3,4,5,7,8<br>,20,22  | 5 | D4A5U3,P23593,P35280,P70549,Q4G075                      |

|      |                               |                       |    |                                                                                     |
|------|-------------------------------|-----------------------|----|-------------------------------------------------------------------------------------|
| 6297 | 1,6,17,18,<br>19,22,23,2<br>4 | 2,3,4,5,7,8<br>,20,21 | 12 | D4A5U3,P02780,P06760,P11883,P22273,P47967,P62804,P70549,Q00715,Q4G075,Q5I0D1,Q811M5 |
| 6298 | 1,6,17,18,<br>20,21,22,2<br>3 | 2,3,4,5,7,8<br>,19,24 | 1  | Q6TMA8                                                                              |
| 6299 | 1,6,17,18,<br>20,21,22,2<br>4 | 2,3,4,5,7,8<br>,19,23 | 3  | P20761,P22006,P50115                                                                |
| 6300 | 1,6,17,18,<br>20,21,23,2<br>4 | 2,3,4,5,7,8<br>,19,22 | 2  | P11883,P35280                                                                       |
| 6301 | 1,6,17,18,<br>20,22,23,2<br>4 | 2,3,4,5,7,8<br>,19,21 | 9  | P04355,P06760,P11883,P22006,P47967,P62804,P70549,Q00715,Q66H69                      |
| 6302 | 1,6,17,18,<br>21,22,23,2<br>4 | 2,3,4,5,7,8<br>,19,20 | 7  | D4A5U3,P02780,P47967,P70549,Q4G075,Q5I0D1,Q6TMA8                                    |
| 6303 | 1,6,17,19,<br>20,21,22,2<br>3 | 2,3,4,5,7,8<br>,18,24 | 4  | B0LT89,O89117,P20762,P20766                                                         |
| 6304 | 1,6,17,19,<br>20,21,22,2<br>4 | 2,3,4,5,7,8<br>,18,23 | 9  | B0LT89,O70594,O89117,P05539,P20761,P20762,P20766,P70549,Q9Z2L0                      |
| 6305 | 1,6,17,19,<br>20,21,23,2<br>4 | 2,3,4,5,7,8<br>,18,22 | 6  | B0LT89,P20762,P23593,P27590,P35280,P70549                                           |
| 6306 | 1,6,17,19,<br>20,22,23,2<br>4 | 2,3,4,5,7,8<br>,18,21 | 7  | O70594,O89117,P02625,P22006,P47967,P70549,Q00715                                    |
| 6307 | 1,6,17,19,<br>21,22,23,2<br>4 | 2,3,4,5,7,8<br>,18,20 | 6  | D4A5U3,P47967,P70549,Q4G075,Q5I0D1,Q811M5                                           |
| 6308 | 1,6,17,20,<br>21,22,23,2<br>4 | 2,3,4,5,7,8<br>,18,19 | 3  | A0JPJ7,P20762,P20766                                                                |
| 6309 | 1,6,18,19,<br>20,21,22,2<br>3 | 2,3,4,5,7,8<br>,17,24 | 2  | O70594,P23593                                                                       |

|      |                               |                        |    |                                                                                                                        |
|------|-------------------------------|------------------------|----|------------------------------------------------------------------------------------------------------------------------|
| 6310 | 1,6,18,19,<br>20,21,22,2<br>4 | 2,3,4,5,7,8<br>17,23   | 6  | O70594,P20761,P22006,P36376,P50115,Q5PQL7                                                                              |
| 6311 | 1,6,18,19,<br>20,21,23,2<br>4 | 2,3,4,5,7,8<br>17,22   | 3  | O70417,P23593,P35280                                                                                                   |
| 6312 | 1,6,18,19,<br>20,22,23,2<br>4 | 2,3,4,5,7,8<br>17,21   | 10 | O70594,P04355,P06760,P11883,P22006,P50115,P70549,Q00715,Q811M5,Q9QX74                                                  |
| 6313 | 1,6,18,19,<br>21,22,23,2<br>4 | 2,3,4,5,7,8<br>17,20   | 9  | D4A5U3,O70417,P13676,P19223,P28648,P70549,P97697,Q4G075,Q811M5                                                         |
| 6314 | 1,6,18,20,<br>21,22,23,2<br>4 | 2,3,4,5,7,8<br>17,19   | 5  | O70594,P01835,P20646,P22006,P50115                                                                                     |
| 6315 | 1,6,19,20,<br>21,22,23,2<br>4 | 2,3,4,5,7,8<br>17,18   | 4  | O70594,P20766,P22006,Q811M5                                                                                            |
| 6316 | 1,7,8,17,1<br>8,19,20,21      | 2,3,4,5,6,2<br>2,23,24 | 17 | B0LT89,O08815,P13676,P20646,P21674,P24368,P30120,P30919,P36374,P47727,Q4KLZ6,Q6P6R2,Q811M5,Q812E4,Q9QX74,Q9WTT6,Q9Z2L0 |
| 6317 | 1,7,8,17,1<br>8,19,20,22      | 2,3,4,5,6,2<br>1,23,24 | 6  | B0LT89,P30919,P36860,P47727,Q4KLZ6,Q9WTT6                                                                              |
| 6318 | 1,7,8,17,1<br>8,19,20,23      | 2,3,4,5,6,2<br>1,22,24 | 5  | P21674,P30919,Q4KLZ6,Q6AYC4,Q9WTT6                                                                                     |
| 6319 | 1,7,8,17,1<br>8,19,20,24      | 2,3,4,5,6,2<br>1,22,23 | 11 | B0LT89,P08723,P09656,P30120,P30919,P36374,P47727,P70549,Q812E4,Q9WTT6,Q9Z2L0                                           |
| 6320 | 1,7,8,17,1<br>8,19,21,22      | 2,3,4,5,6,2<br>0,23,24 | 5  | P42854,Q4KLZ6,Q6P6R2,Q9QX74,Q9Z2L0                                                                                     |
| 6321 | 1,7,8,17,1<br>8,19,21,23      | 2,3,4,5,6,2<br>0,22,24 | 5  | P21674,P22006,Q4KLZ6,Q6P6R2,Q9QX74                                                                                     |
| 6322 | 1,7,8,17,1<br>8,19,21,24      | 2,3,4,5,6,2<br>0,22,23 | 7  | P09656,P42854,Q66H69,Q6P6R2,Q99MH3,Q9QX74,Q9Z2L0                                                                       |
| 6323 | 1,7,8,17,1<br>8,19,22,23      | 2,3,4,5,6,2<br>0,21,24 | 4  | O55145,P21674,P70549,Q4KLZ6                                                                                            |
| 6324 | 1,7,8,17,1<br>8,19,22,24      | 2,3,4,5,6,2<br>0,21,23 | 5  | O55145,P09656,P42854,P70549,Q9Z2L0                                                                                     |
| 6325 | 1,7,8,17,1<br>8,19,23,24      | 2,3,4,5,6,2<br>0,21,22 | 2  | O55145,P70549                                                                                                          |
| 6326 | 1,7,8,17,1<br>8,20,21,22      | 2,3,4,5,6,1<br>9,23,24 | 8  | P30919,P35745,P42854,P47727,Q4KLZ6,Q9QX74,Q9WTT6,Q9Z2L0                                                                |

|      |                                              |                                                                                                                                         |
|------|----------------------------------------------|-----------------------------------------------------------------------------------------------------------------------------------------|
| 6327 | 1,7,8,17,1 2,3,4,5,6,1<br>8,20,21,23 9,22,24 | 7 P21674,P30919,P35745,Q4KLZ6,Q6P6R2,Q9QX74,Q9WTT6                                                                                      |
| 6328 | 1,7,8,17,1 2,3,4,5,6,1<br>8,20,21,24 9,22,23 | 12 P00507,P02782,P08723,P30120,P35745,P42854,P47727,Q811M5,Q812E4,Q9JHB9,Q9WTT6,Q9Z2L0                                                  |
| 6329 | 1,7,8,17,1 2,3,4,5,6,1<br>8,20,22,23 9,21,24 | 3 P30919,P35745,Q4KLZ6                                                                                                                  |
| 6330 | 1,7,8,17,1 2,3,4,5,6,1<br>8,20,22,24 9,21,23 | 3 P42854,P47727,Q9Z2L0                                                                                                                  |
| 6331 | 1,7,8,17,1 2,3,4,5,6,1<br>8,20,23,24 9,21,22 | 3 P30919,P35745,Q6AYC4                                                                                                                  |
| 6332 | 1,7,8,17,1 2,3,4,5,6,1<br>8,21,22,23 9,20,24 | 3 P35745,P68511,Q4KLZ6                                                                                                                  |
| 6333 | 1,7,8,17,1 2,3,4,5,6,1<br>8,21,22,24 9,20,23 | 3 P42854,Q9Z1F2,Q9Z2L0                                                                                                                  |
| 6334 | 1,7,8,17,1 2,3,4,5,6,1<br>8,21,23,24 9,20,22 | 2 P42854,Q9Z2L0                                                                                                                         |
| 6335 | 1,7,8,17,1 2,3,4,5,6,1<br>8,22,23,24 9,20,21 | 5 O55145,P42854,P70549,Q5I0D1,Q64268                                                                                                    |
| 6336 | 1,7,8,17,1 2,3,4,5,6,1<br>9,20,21,22 8,23,24 | 11 B0LT89,O89117,P30120,P47727,Q4KLZ6,Q6P6R2,Q812E4,Q9JJ50,Q9QX74,Q9WTT6,Q9Z2L0                                                         |
| 6337 | 1,7,8,17,1 2,3,4,5,6,1<br>9,20,21,23 8,22,24 | 8 B0LT89,P21674,Q4KLZ6,Q6P6R2,Q812E4,Q9QX74,Q9WTT6,Q9Z2L0                                                                               |
| 6338 | 1,7,8,17,1 2,3,4,5,6,1<br>9,20,21,24 8,22,23 | 19 B0LT89,O35547,P02782,P08723,P09456,P13676,P16636,P24368,P30120,P36374,P47727,P60905,Q6P6R2,Q812E4,Q99MH3,Q9EQS0,Q9QX74,Q9WTT6,Q9Z2L0 |
| 6339 | 1,7,8,17,1 2,3,4,5,6,1<br>9,20,22,23 8,21,24 | 3 O89117,Q4KLZ6,Q9WTT6                                                                                                                  |
| 6340 | 1,7,8,17,1 2,3,4,5,6,1<br>9,20,22,24 8,21,23 | 7 O89117,P08723,P47727,P70549,Q9JJ50,Q9WTT6,Q9Z2L0                                                                                      |
| 6341 | 1,7,8,17,1 2,3,4,5,6,1<br>9,20,23,24 8,21,22 | 6 P08723,P70549,Q6AYC4,Q812E4,Q9WTT6,Q9Z2L0                                                                                             |
| 6342 | 1,7,8,17,1 2,3,4,5,6,1<br>9,21,22,23 8,20,24 | 3 P21674,Q4KLZ6,Q9QX74                                                                                                                  |
| 6343 | 1,7,8,17,1 2,3,4,5,6,1<br>9,21,22,24 8,20,23 | 3 P16636,P42854,Q9Z2L0                                                                                                                  |
| 6344 | 1,7,8,17,1 2,3,4,5,6,1<br>9,21,23,24 8,20,22 | 3 P21674,Q63474,Q9Z2L0                                                                                                                  |
| 6345 | 1,7,8,17,1 2,3,4,5,6,1<br>9,22,23,24 8,20,21 | 2 O55145,P70549                                                                                                                         |
| 6346 | 1,7,8,17,2 2,3,4,5,6,1<br>0,21,22,23 8,19,24 | 3 P35745,Q4KLZ6,Q9WTT6                                                                                                                  |

|      |                                              |                                                                                 |
|------|----------------------------------------------|---------------------------------------------------------------------------------|
| 6347 | 1,7,8,17,2 2,3,4,5,6,1<br>0,21,22,24 8,19,23 | 7 P02782,P30120,P35745,P42854,P47727,Q812E4,Q9Z2L0                              |
| 6348 | 1,7,8,17,2 2,3,4,5,6,1<br>0,21,23,24 8,19,22 | 4 P30120,P35745,Q812E4,Q9Z2L0                                                   |
| 6349 | 1,7,8,17,2 2,3,4,5,6,1<br>0,22,23,24 8,19,21 | 1 P35745                                                                        |
| 6350 | 1,7,8,17,2 2,3,4,5,6,1<br>1,22,23,24 8,19,20 | 2 P35745,Q9Z2L0                                                                 |
| 6351 | 1,7,8,18,1 2,3,4,5,6,1<br>9,20,21,22 7,23,24 | 5 P01039,P47727,Q4KLZ6,Q9WTT6,Q9Z2L0                                            |
| 6352 | 1,7,8,18,1 2,3,4,5,6,1<br>9,20,21,23 7,22,24 | 6 P01039,P21674,P23593,Q4KLZ6,Q812E4,Q9WTT6                                     |
| 6353 | 1,7,8,18,1 2,3,4,5,6,1<br>9,20,21,24 7,22,23 | 11 O08815,P02782,P08723,P22283,P24368,P30120,P47727,Q812E4,Q9QW07,Q9WTT6,Q9Z2L0 |
| 6354 | 1,7,8,18,1 2,3,4,5,6,1<br>9,20,22,23 7,21,24 | 4 P01039,P36860,Q4KLZ6,Q6AY61                                                   |
| 6355 | 1,7,8,18,1 2,3,4,5,6,1<br>9,20,22,24 7,21,23 | 1 P08723                                                                        |
| 6356 | 1,7,8,18,1 2,3,4,5,6,1<br>9,20,23,24 7,21,22 | 2 Q6AYC4,Q812E4                                                                 |
| 6357 | 1,7,8,18,1 2,3,4,5,6,1<br>9,21,22,23 7,20,24 | 3 P01039,P55281,Q4KLZ6                                                          |
| 6358 | 1,7,8,18,1 2,3,4,5,6,1<br>9,21,22,24 7,20,23 | 4 P17559,P36376,P42854,Q9Z2L0                                                   |
| 6359 | 1,7,8,18,1 2,3,4,5,6,1<br>9,21,23,24 7,20,22 | 0                                                                               |
| 6360 | 1,7,8,18,1 2,3,4,5,6,1<br>9,22,23,24 7,20,21 | 3 O55145,P19223,P70549                                                          |
| 6361 | 1,7,8,18,2 2,3,4,5,6,1<br>0,21,22,23 7,19,24 | 3 P01039,P35745,Q4KLZ6                                                          |
| 6362 | 1,7,8,18,2 2,3,4,5,6,1<br>0,21,22,24 7,19,23 | 3 P30120,P42854,Q9Z2L0                                                          |
| 6363 | 1,7,8,18,2 2,3,4,5,6,1<br>0,21,23,24 7,19,22 | 1 Q812E4                                                                        |
| 6364 | 1,7,8,18,2 2,3,4,5,6,1<br>0,22,23,24 7,19,21 | 1 Q9WVK7                                                                        |
| 6365 | 1,7,8,18,2 2,3,4,5,6,1<br>1,22,23,24 7,19,20 | 2 P55281,Q64268                                                                 |
| 6366 | 1,7,8,19,2 2,3,4,5,6,1<br>0,21,22,23 7,18,24 | 4 P01039,Q4KLZ6,Q812E4,Q9WTT6                                                   |

|      |                               |                        |    |                                                                                                          |
|------|-------------------------------|------------------------|----|----------------------------------------------------------------------------------------------------------|
| 6367 | 1,7,8,19,2<br>0,21,22,24      | 2,3,4,5,6,1<br>7,18,23 | 8  | O70594,P02782,P08723,P16636,P30120,Q812E4,Q99PP0,Q9Z2L0                                                  |
| 6368 | 1,7,8,19,2<br>0,21,23,24      | 2,3,4,5,6,1<br>7,18,22 | 4  | P08723,P30120,Q812E4,Q9Z2L0                                                                              |
| 6369 | 1,7,8,19,2<br>0,22,23,24      | 2,3,4,5,6,1<br>7,18,21 | 2  | P70549,Q812E4                                                                                            |
| 6370 | 1,7,8,19,2<br>1,22,23,24      | 2,3,4,5,6,1<br>7,18,20 | 2  | P19223,P55281                                                                                            |
| 6371 | 1,7,8,20,2<br>1,22,23,24      | 2,3,4,5,6,1<br>7,18,19 | 2  | P35745,Q812E4                                                                                            |
| 6372 | 1,7,17,18,<br>19,20,21,2<br>2 | 2,3,4,5,6,8<br>,23,24  | 12 | B0LT89,P20760,P20761,P23593,P30919,P42854,Q05702,Q4KLZ6,Q5PQL7,Q63532,Q6P6R2,Q9Z2L0                      |
| 6373 | 1,7,17,18,<br>19,20,21,2<br>3 | 2,3,4,5,6,8<br>,22,24  | 9  | B0LT89,P21674,P23593,P30919,Q05702,Q10743,Q4KLZ6,Q6P6R2,Q9Z2L0                                           |
| 6374 | 1,7,17,18,<br>19,20,21,2<br>4 | 2,3,4,5,6,8<br>,22,23  | 15 | B0LT89,O54858,P20760,P20761,P20762,P23593,P30919,P36376,P42854,Q05702,Q09030,Q63532,Q6P6R2,Q99MH3,Q9Z2L0 |
| 6375 | 1,7,17,18,<br>19,20,22,2<br>3 | 2,3,4,5,6,8<br>,21,24  | 8  | P02625,P30919,P36860,P70549,Q05702,Q10743,Q4KLZ6,Q6AYC4                                                  |
| 6376 | 1,7,17,18,<br>19,20,22,2<br>4 | 2,3,4,5,6,8<br>,21,23  | 8  | P20761,P30919,P42854,P70549,Q05702,Q63532,Q6AYC4,Q9Z2L0                                                  |
| 6377 | 1,7,17,18,<br>19,20,23,2<br>4 | 2,3,4,5,6,8<br>,21,22  | 7  | P23593,P30919,P42854,P70549,Q05702,Q10743,Q6AYC4                                                         |
| 6378 | 1,7,17,18,<br>19,21,22,2<br>3 | 2,3,4,5,6,8<br>,20,24  | 5  | P17559,P42854,Q05702,Q10743,Q4KLZ6                                                                       |
| 6379 | 1,7,17,18,<br>19,21,22,2<br>4 | 2,3,4,5,6,8<br>,20,23  | 8  | P17559,P20761,P25031,P36376,P42854,Q05702,Q99MH3,Q9Z2L0                                                  |
| 6380 | 1,7,17,18,<br>19,21,23,2<br>4 | 2,3,4,5,6,8<br>,20,22  | 7  | P17559,P23593,P25031,P42854,Q05702,Q10743,Q9Z2L0                                                         |
| 6381 | 1,7,17,18,<br>19,22,23,2<br>4 | 2,3,4,5,6,8<br>,20,21  | 14 | D4A5U3,O55145,P02631,P17559,P22273,P25031,P36375,P42854,P70549,Q05702,Q10743,Q64268,Q6AYC4,Q9QZQ5        |



|      |                               |                       |    |                                                                       |
|------|-------------------------------|-----------------------|----|-----------------------------------------------------------------------|
| 6382 | 1,7,17,18,<br>20,21,22,2<br>3 | 2,3,4,5,6,8<br>,19,24 | 5  | P30919,P42854,Q05702,Q10743,Q4KLZ6                                    |
| 6383 | 1,7,17,18,<br>20,21,22,2<br>4 | 2,3,4,5,6,8<br>,19,23 | 5  | P20760,P20761,P42854,Q05702,Q9Z2L0                                    |
| 6384 | 1,7,17,18,<br>20,21,23,2<br>4 | 2,3,4,5,6,8<br>,19,22 | 4  | P30919,P42854,Q05702,Q9Z2L0                                           |
| 6385 | 1,7,17,18,<br>20,22,23,2<br>4 | 2,3,4,5,6,8<br>,19,21 | 9  | P08937,P30919,P42854,P52590,Q05702,Q10743,Q64268,Q6AYC4,Q9QZQ5        |
| 6386 | 1,7,17,18,<br>21,22,23,2<br>4 | 2,3,4,5,6,8<br>,19,20 | 8  | D4A5U3,P25031,P42854,P52590,Q05702,Q5I0D1,Q64268,Q9QZQ5               |
| 6387 | 1,7,17,19,<br>20,21,22,2<br>3 | 2,3,4,5,6,8<br>,18,24 | 5  | P23593,Q05702,Q4KLZ6,Q9QZQ5,Q9Z2L0                                    |
| 6388 | 1,7,17,19,<br>20,21,22,2<br>4 | 2,3,4,5,6,8<br>,18,23 | 10 | O70594,P16636,P20761,P20762,P42854,Q05702,Q63532,Q99MH3,Q9QZQ5,Q9Z2L0 |
| 6389 | 1,7,17,19,<br>20,21,23,2<br>4 | 2,3,4,5,6,8<br>,18,22 | 5  | P20762,P23593,Q05702,Q9QZQ5,Q9Z2L0                                    |
| 6390 | 1,7,17,19,<br>20,22,23,2<br>4 | 2,3,4,5,6,8<br>,18,21 | 8  | O89117,P02625,P70549,Q00715,Q05702,Q6AYC4,Q9QZQ5,Q9Z2L0               |
| 6391 | 1,7,17,19,<br>21,22,23,2<br>4 | 2,3,4,5,6,8<br>,18,20 | 7  | P17559,P42854,P70549,Q05702,Q9QZQ5,Q9R168,Q9Z2L0                      |
| 6392 | 1,7,17,20,<br>21,22,23,2<br>4 | 2,3,4,5,6,8<br>,18,19 | 5  | P42854,P52590,Q05702,Q9QZQ5,Q9Z2L0                                    |
| 6393 | 1,7,18,19,<br>20,21,22,2<br>3 | 2,3,4,5,6,8<br>,17,24 | 6  | P01039,P23593,Q05702,Q4KLZ6,Q99PP0,Q9QZQ5                             |
| 6394 | 1,7,18,19,<br>20,21,22,2<br>4 | 2,3,4,5,6,8<br>,17,23 | 9  | O70594,P20760,P20761,P23593,P36376,P42854,Q05702,Q99PP0,Q9Z2L0        |

|      |                               |                       |    |                                                                       |
|------|-------------------------------|-----------------------|----|-----------------------------------------------------------------------|
| 6395 | 1,7,18,19,<br>20,21,23,2<br>4 | 2,3,4,5,6,8<br>,17,22 | 5  | P23593,Q05702,Q99PP0,Q9QZQ5,Q9Z2L0                                    |
| 6396 | 1,7,18,19,<br>20,22,23,2<br>4 | 2,3,4,5,6,8<br>,17,21 | 5  | O70594,P70549,Q05702,Q6AYC4,Q9QZQ5                                    |
| 6397 | 1,7,18,19,<br>21,22,23,2<br>4 | 2,3,4,5,6,8<br>,17,20 | 10 | D4A5U3,P17559,P19223,P25031,P36375,P36376,P42854,P55281,Q05702,Q9QZQ5 |
| 6398 | 1,7,18,20,<br>21,22,23,2<br>4 | 2,3,4,5,6,8<br>,17,19 | 6  | O70594,P01835,P42854,P52590,Q05702,Q9QZQ5                             |
| 6399 | 1,7,19,20,<br>21,22,23,2<br>4 | 2,3,4,5,6,8<br>,17,18 | 7  | O70594,P23593,Q05702,Q64240,Q99PP0,Q9QZQ5,Q9Z2L0                      |
| 6400 | 1,8,17,18,<br>19,20,21,2<br>2 | 2,3,4,5,6,7<br>,23,24 | 8  | B0LT89,P20761,P42854,P47727,P50116,Q4KLZ6,Q6P6R2,Q9Z2L0               |
| 6401 | 1,8,17,18,<br>19,20,21,2<br>3 | 2,3,4,5,6,7<br>,22,24 | 7  | B0LT89,P21674,P23593,P30919,Q4KLZ6,Q6P6R2,Q9Z2L0                      |
| 6402 | 1,8,17,18,<br>19,20,21,2<br>4 | 2,3,4,5,6,7<br>,22,23 | 10 | B0LT89,P23593,P30120,P42854,P47727,P50116,P60905,P80299,Q6P6R2,Q9Z2L0 |
| 6403 | 1,8,17,18,<br>19,20,22,2<br>3 | 2,3,4,5,6,7<br>,21,24 | 10 | B0LT89,O89117,P00714,P04762,P30919,P36860,P50116,P70549,Q4KLZ6,Q6AY61 |
| 6404 | 1,8,17,18,<br>19,20,22,2<br>4 | 2,3,4,5,6,7<br>,21,23 | 10 | B0LT89,O70594,P36860,P42854,P47727,P50116,P70549,P80299,Q9JJ50,Q9Z2L0 |
| 6405 | 1,8,17,18,<br>19,20,23,2<br>4 | 2,3,4,5,6,7<br>,21,22 | 6  | B0LT89,P30919,P50116,P70549,P80299,Q6AYC4                             |
| 6406 | 1,8,17,18,<br>19,21,22,2<br>3 | 2,3,4,5,6,7<br>,20,24 | 2  | P50116,Q4KLZ6                                                         |
| 6407 | 1,8,17,18,<br>19,21,22,2<br>4 | 2,3,4,5,6,7<br>,20,23 | 5  | P42854,P50116,P70549,P80299,Q9Z2L0                                    |

|      |                               |                       |         |                                                                                    |
|------|-------------------------------|-----------------------|---------|------------------------------------------------------------------------------------|
| 6408 | 1,8,17,18,<br>19,21,23,2<br>4 | 2,3,4,5,6,7<br>,20,22 | 6       | P23593,P42854,P50116,P70549,P80299,Q9Z2L0                                          |
| 6409 | 1,8,17,18,<br>19,22,23,2<br>4 | 2,3,4,5,6,7<br>,20,21 | 8       | O55145,P11598,P42854,P47967,P50116,P70549,P80299,Q5I0D1                            |
| 6410 | 1,8,17,18,<br>20,21,22,2<br>3 | 2,3,4,5,6,7<br>,19,24 | 3       | P42854,P50116,Q4KLZ6                                                               |
| 6411 | 1,8,17,18,<br>20,21,22,2<br>4 | 2,3,4,5,6,7<br>,19,23 | 7       | P30120,P42854,P47727,P50116,P52590,P80299,Q9Z2L0                                   |
| 6412 | 1,8,17,18,<br>20,21,23,2<br>4 | 2,3,4,5,6,7<br>,19,22 | 4       | P42854,P50116,P80299,Q9Z2L0                                                        |
| 6413 | 1,8,17,18,<br>20,22,23,2<br>4 | 2,3,4,5,6,7<br>,19,21 | 7       | P00714,P42854,P47967,P50116,P52590,P70549,P80299                                   |
| 6414 | 1,8,17,18,<br>21,22,23,2<br>4 | 2,3,4,5,6,7<br>,19,20 | 7       | P42854,P47967,P50116,P52590,P80299,Q5I0D1,Q9R0T3                                   |
| 6415 | 1,8,17,19,<br>20,21,22,2<br>3 | 2,3,4,5,6,7<br>,18,24 | 7       | B0LT89,O89117,P20766,P50116,Q4KLZ6,Q6P6R2,Q9Z2L0                                   |
| 6416 | 1,8,17,19,<br>20,21,22,2<br>4 | 2,3,4,5,6,7<br>,18,23 | 12<br>0 | B0LT89,O70594,O89117,P16636,P20766,P30120,P42854,P47727,P50116,P60905,Q9JJ50,Q9Z2L |
| 6417 | 1,8,17,19,<br>20,21,23,2<br>4 | 2,3,4,5,6,7<br>,18,22 | 8       | B0LT89,P23593,P30120,P50116,P80299,Q6P6R2,Q812E4,Q9Z2L0                            |
| 6418 | 1,8,17,19,<br>20,22,23,2<br>4 | 2,3,4,5,6,7<br>,18,21 | 5       | O89117,P36860,P50116,P70549,Q00715                                                 |
| 6419 | 1,8,17,19,<br>21,22,23,2<br>4 | 2,3,4,5,6,7<br>,18,20 | 6       | P47967,P50116,P70549,P80299,Q80WL1,Q9Z2L0                                          |
| 6420 | 1,8,17,20,<br>21,22,23,2<br>4 | 2,3,4,5,6,7<br>,18,19 | 6       | P20766,P42854,P50116,P52590,P80299,Q9Z2L0                                          |

|      |                                |                       |    |                                                                                                                                                                         |
|------|--------------------------------|-----------------------|----|-------------------------------------------------------------------------------------------------------------------------------------------------------------------------|
| 6421 | 1,8,18,19,<br>20,21,22,2<br>3  | 2,3,4,5,6,7<br>,17,24 | 6  | O70594,P01039,P36860,P50116,Q4KLZ6,Q6AY61                                                                                                                               |
| 6422 | 1,8,18,19,<br>20,21,22,2<br>4  | 2,3,4,5,6,7<br>,17,23 | 7  | B0LT89,O70594,P30120,P42854,P50116,Q99PP0,Q9Z2L0                                                                                                                        |
| 6423 | 1,8,18,19,<br>20,21,23,2<br>4  | 2,3,4,5,6,7<br>,17,22 | 3  | P23593,P50116,P80299                                                                                                                                                    |
| 6424 | 1,8,18,19,<br>20,22,23,2<br>4  | 2,3,4,5,6,7<br>,17,21 | 5  | O70594,P36860,P50116,P70549,Q6AY61                                                                                                                                      |
| 6425 | 1,8,18,19,<br>21,22,23,2<br>4  | 2,3,4,5,6,7<br>,17,20 | 3  | P19223,P50116,P55281                                                                                                                                                    |
| 6426 | 1,8,18,20,<br>21,22,23,2<br>4  | 2,3,4,5,6,7<br>,17,19 | 5  | O70594,P42854,P50115,P50116,P52590                                                                                                                                      |
| 6427 | 1,8,19,20,<br>21,22,23,2<br>4  | 2,3,4,5,6,7<br>,17,18 | 6  | O70594,P20766,P50116,Q99PP0,Q9QZQ5,Q9Z2L0                                                                                                                               |
| 6428 | 1,17,18,19<br>,20,21,22,<br>23 | 2,3,4,5,6,7<br>,8,24  | 14 | B0LT89,O70594,P00714,P20760,P20761,P23593,P30919,P42854,P50115,P50116,Q05702,Q4KLZ6,Q6P6R2,Q9QZQ5                                                                       |
| 6429 | 1,17,18,19<br>,20,21,22,<br>24 | 2,3,4,5,6,7<br>,8,23  | 15 | B0LT89,O54858,O70594,P20760,P20761,P20762,P23593,P42854,P50115,P50116,Q05702,Q09030,Q63532,Q9QZQ5,Q9Z2L0                                                                |
| 6430 | 1,17,18,19<br>,20,21,23,<br>24 | 2,3,4,5,6,7<br>,8,22  | 19 | B0LT89,O54858,O70594,P13852,P20760,P20761,P20762,P23593,P30919,P35280,P38438,P42854,P50115,P50116,Q05702,Q09030,Q99041,Q9QZQ5,Q9Z2L0                                    |
| 6431 | 1,17,18,19<br>,20,22,23,<br>24 | 2,3,4,5,6,7<br>,8,21  | 20 | O70594,P00714,P02625,P02631,P20761,P22273,P23593,P30919,P36860,P38438,P42854,P50115,P50116,P70549,Q00715,Q05702,Q10743,Q6AYC4,Q99041,Q9QZQ5                             |
| 6432 | 1,17,18,19<br>,21,22,23,<br>24 | 2,3,4,5,6,7<br>,8,20  | 24 | D4A5U3,O70417,P01836,P02780,P06911,P11598,P12020,P17559,P22273,P23593,P25031,P42854,P47967,P50115,P50116,P50280,P70549,Q05702,Q4G075,Q5I0D1,Q62946,Q99041,Q9QZQ5,Q9R0T3 |
| 6433 | 1,17,18,20<br>,21,22,23,<br>24 | 2,3,4,5,6,7<br>,8,19  | 13 | A0JPJ7,O70594,P00714,P13852,P20761,P42854,P50115,P50116,P52590,Q05702,Q99041,Q9QZQ5,Q9Z2L0                                                                              |

|      |                                |                      |    |                                                                                                          |
|------|--------------------------------|----------------------|----|----------------------------------------------------------------------------------------------------------|
| 6434 | 1,17,19,20<br>,21,22,23,<br>24 | 2,3,4,5,6,7<br>,8,18 | 15 | O70594,P13852,P20761,P20762,P20766,P23593,P38438,P42854,P50115,P50116,Q05702,Q64240,Q99PP0,Q9QZQ5,Q9Z2L0 |
| 6435 | 1,18,19,20<br>,21,22,23,<br>24 | 2,3,4,5,6,7<br>,8,17 | 12 | O70417,O70594,P13852,P20761,P23593,P42854,P50115,P50116,Q05702,Q64240,Q99PP0,Q9QZQ5                      |

#### Day 14

| Random allocation | Group1               | Group2                      | Numbers of differential urinary proteins | Differential protein ID                                                                                                                                          |
|-------------------|----------------------|-----------------------------|------------------------------------------|------------------------------------------------------------------------------------------------------------------------------------------------------------------|
| 1                 | 1,2,3,4,5,6<br>,7,8  | 25,26,27,28<br>,29,30,31,32 | 23                                       | D3ZUC6,O70594,P01836,P02454,P02631,P02783,P06911,P19218,P42854,P50115,P52590,P97580,Q05702,Q09030,Q30KJ2,Q4KLZ6,Q5RJR2,Q63532,Q64240,Q91XN4,Q99041,Q99PP0,Q9QZQ5 |
| 2                 | 1,2,3,4,5,6<br>,7,25 | 8,26,27,28<br>,29,30,31,32  | 8                                        | O54800;Q5DWV2,P52590,Q09030,Q4AEF8,Q4KLZ6,Q99PP0,Q9QWN8,Q9WVH8                                                                                                   |
| 3                 | 1,2,3,4,5,6<br>,7,26 | 8,25,27,28<br>,29,30,31,32  | 9                                        | O54800;Q5DWV2,P00762,P02783,P21588,P52590,Q4KLZ6,Q5RLM2,Q99PP0,Q9WVH8                                                                                            |
| 4                 | 1,2,3,4,5,6<br>,7,27 | 8,25,26,28<br>,29,30,31,32  | 12                                       | P01039,P02783,P19218,P21588,P47967,P50116,P52590,Q03191,Q4KLZ6,Q5I0D1,Q5I0D7,Q9JJ50                                                                              |
| 5                 | 1,2,3,4,5,6<br>,7,28 | 8,25,26,27<br>,29,30,31,32  | 10                                       | P00762,P11598,P19218,P47967,P52590,P97840,Q09030,Q4KLZ6,Q5RLM2,Q99PP0                                                                                            |
| 6                 | 1,2,3,4,5,6<br>,7,29 | 8,25,26,27<br>,28,30,31,32  | 10                                       | O70594,P00762,P02783,P26342,P42854,P47967,P52590,Q4KLZ6,Q5RJR2,Q9QWN8                                                                                            |
| 7                 | 1,2,3,4,5,6<br>,7,30 | 8,25,26,27<br>,28,29,31,32  | 15                                       | P17046,P19218,P21588,P26342,P33436,P36374,P52590,P84039,Q09030,Q4KLZ6,Q5RJR2,Q6P6R2,Q80WL1,Q9QWN8,Q9WUW8                                                         |
| 8                 | 1,2,3,4,5,6<br>,7,31 | 8,25,26,27<br>,28,29,30,32  | 12                                       | P20766,P26342,P33436,P52590,Q09030,Q4KLZ6,Q5RJR2,Q63532,Q6AYR9,Q8CFN2,Q9QWN8,Q9QX79                                                                              |
| 9                 | 1,2,3,4,5,6<br>,7,32 | 8,25,26,27<br>,28,29,30,31  | 8                                        | O54800;Q5DWV2,P0DP29,P0DP30,P0DP31,P26342,P42854,P52590,Q09030,Q4KLZ6,Q6P6R2                                                                                     |
| 10                | 1,2,3,4,5,6<br>,8,25 | 7,26,27,28<br>,29,30,31,32  | 13                                       | P01681,P36376,P42854,P52590,P97580,Q05702,Q09030,Q30KJ2,Q4KLZ6,Q63532,Q64240,Q99PP0,Q9QZQ5                                                                       |

|    |                       |                                |    |                                                                                                                                             |
|----|-----------------------|--------------------------------|----|---------------------------------------------------------------------------------------------------------------------------------------------|
| 11 | 1,2,3,4,5,6<br>,8,26  | 7,25,27,28<br>,29,30,31,<br>32 | 15 | P02783,P20762,P42854,P52590,P97580,Q05702,Q09030,Q30KJ2,Q4KLZ6,Q5RJR2,Q63532,Q64240,Q99MH3,Q99PP0,Q9QZQ5                                    |
| 12 | 1,2,3,4,5,6<br>,8,27  | 7,25,26,28<br>,29,30,31,<br>32 | 14 | P00731,P02783,P15399,P17559,P19218,P42854,P52590,P97580,Q03191,Q09030,Q10758,Q30KJ2,Q4KLZ6,Q9QZQ5                                           |
| 13 | 1,2,3,4,5,6<br>,8,28  | 7,25,26,27<br>,29,30,31,<br>32 | 13 | D3ZUC6,P19218,P36376,P42854,P52590,P97580,Q09030,Q30KJ2,Q4KLZ6,Q63532,Q99PP0,Q9JI85,Q9QZQ5                                                  |
| 14 | 1,2,3,4,5,6<br>,8,29  | 7,25,26,27<br>,28,30,31,<br>32 | 11 | O70594,P02783,P42854,P52590,P97580,Q05702,Q09030,Q30KJ2,Q4KLZ6,Q5RJR2,Q9QZQ5                                                                |
| 15 | 1,2,3,4,5,6<br>,8,30  | 7,25,26,27<br>,28,29,31,<br>32 | 20 | O88797,P19218,P33436,P36374,P52590,P97580,Q05702,Q09030,Q30KJ2,Q4FZU2,Q4KLZ6,Q5RJR2,Q63532,Q6IFU7,Q6IFU8,Q6IFW6,Q6IG02,Q6IG05,Q6IMF3,Q6P6Q2 |
| 16 | 1,2,3,4,5,6<br>,8,31  | 7,25,26,27<br>,28,29,30,<br>32 | 12 | P33436,P36376,P52590,P97580,Q05702,Q09030,Q30KJ2,Q4KLZ6,Q5RJR2,Q63532,Q99PP0,Q9QZQ5                                                         |
| 17 | 1,2,3,4,5,6<br>,8,32  | 7,25,26,27<br>,28,29,30,<br>31 | 11 | P01681,P42854,P52590,P97580,Q05702,Q09030,Q30KJ2,Q4KLZ6,Q63532,Q64240,Q9QZQ5                                                                |
| 18 | 1,2,3,4,5,6<br>,25,26 | 7,8,27,28,<br>29,30,31,3<br>2  | 8  | O54800;Q5DWV2,P21588,P52590,Q06000,Q09030,Q4KLZ6,Q63150,Q812E4                                                                              |
| 19 | 1,2,3,4,5,6<br>,25,27 | 7,8,26,28,<br>29,30,31,3<br>2  | 5  | P52590,Q03191,Q09030,Q4KLZ6,Q5I0D7                                                                                                          |
| 20 | 1,2,3,4,5,6<br>,25,28 | 7,8,26,27,<br>29,30,31,3<br>2  | 3  | P52590,Q09030,Q4KLZ6                                                                                                                        |
| 21 | 1,2,3,4,5,6<br>,25,29 | 7,8,26,27,<br>28,30,31,3<br>2  | 5  | P42854,P52590,Q09030,Q4KLZ6,Q9QWN8                                                                                                          |
| 22 | 1,2,3,4,5,6<br>,25,30 | 7,8,26,27,<br>28,29,31,3<br>2  | 13 | O54800;Q5DWV2,P36374,P52590,P97523,P97584,Q09030,Q4KLZ6,Q6AYR9,Q6P6R2,Q812E4,Q9QWN8,Q9QX74,Q9WTT6                                           |
| 23 | 1,2,3,4,5,6<br>,25,31 | 7,8,26,27,<br>28,29,30,3<br>2  | 12 | P29315,P52590,P97584,Q09030,Q4KLZ6,Q63532,Q6AYR9,Q6P6R2,Q812E4,Q8CFN2,Q9QWN8,Q9WTT6                                                         |

|    |                       |                               |    |                                                                                                              |
|----|-----------------------|-------------------------------|----|--------------------------------------------------------------------------------------------------------------|
| 24 | 1,2,3,4,5,6<br>,25,32 | 7,8,26,27,<br>28,29,30,3<br>1 | 9  | O54800;Q5DWV2,P01681,P52590,P97584,Q09030,Q4KLZ6,Q6P6R2,Q9QX74,Q9WTT6                                        |
| 25 | 1,2,3,4,5,6<br>,26,27 | 7,8,25,28,<br>29,30,31,3<br>2 | 7  | P01039,P02783,P21588,P52590,Q03191,Q4KLZ6,Q9JJ50                                                             |
| 26 | 1,2,3,4,5,6<br>,26,28 | 7,8,25,27,<br>29,30,31,3<br>2 | 3  | P21588,P52590,Q4KLZ6                                                                                         |
| 27 | 1,2,3,4,5,6<br>,26,29 | 7,8,25,27,<br>28,30,31,3<br>2 | 5  | P02783,P21588,P42854,P52590,Q4KLZ6                                                                           |
| 28 | 1,2,3,4,5,6<br>,26,30 | 7,8,25,27,<br>28,29,31,3<br>2 | 9  | P21588,P36374,P47727,P52590,Q4KLZ6,Q5RJR2,Q6AYR9,Q812E4,Q99MH3                                               |
| 29 | 1,2,3,4,5,6<br>,26,31 | 7,8,25,27,<br>28,29,30,3<br>2 | 10 | P47727,P52590,Q4KLZ6,Q63150,Q63532,Q6AYR9,Q812E4,Q8CFN2,Q99MH3,Q9Z2L0                                        |
| 30 | 1,2,3,4,5,6<br>,26,32 | 7,8,25,27,<br>28,29,30,3<br>1 | 4  | O54800;Q5DWV2,P52590,Q4KLZ6,Q99MH3                                                                           |
| 31 | 1,2,3,4,5,6<br>,27,28 | 7,8,25,26,<br>29,30,31,3<br>2 | 6  | P09656,P19218,P21588,P52590,Q03191,Q4KLZ6                                                                    |
| 32 | 1,2,3,4,5,6<br>,27,29 | 7,8,25,26,<br>28,30,31,3<br>2 | 8  | P02783,P09656,P21588,P42854,P52590,Q03191,Q4KLZ6,Q9JJ50                                                      |
| 33 | 1,2,3,4,5,6<br>,27,30 | 7,8,25,26,<br>28,29,31,3<br>2 | 15 | P01039,P19218,P21588,P30120,P33436,P52590,P84039,Q03191,Q4KLZ6,Q5I0J9,Q6IG02,Q6P6<br>Q2,Q6P6R2,Q9QX74,Q9WTT6 |
| 34 | 1,2,3,4,5,6<br>,27,31 | 7,8,25,26,<br>28,29,30,3<br>2 | 6  | P01039,P33436,P52590,Q03191,Q4KLZ6,Q63532                                                                    |
| 35 | 1,2,3,4,5,6<br>,27,32 | 7,8,25,26,<br>28,29,30,3<br>1 | 9  | P01039,P52590,Q03191,Q4KLZ6,Q5I0D7,Q6P6R2,Q9JJ50,Q9QX74,Q9WTT6                                               |
| 36 | 1,2,3,4,5,6<br>,28,29 | 7,8,25,26,<br>27,30,31,3<br>2 | 5  | P09656,P42854,P47967,P52590,Q4KLZ6                                                                           |

|    |                       |                                |                                                                                                                                                |
|----|-----------------------|--------------------------------|------------------------------------------------------------------------------------------------------------------------------------------------|
| 37 | 1,2,3,4,5,6<br>,28,30 | 7,8,25,26,<br>27,29,31,3<br>2  | 7 P19218,P21588,P52590,Q09030,Q4KLZ6,Q9QX74,Q9WTT6                                                                                             |
| 38 | 1,2,3,4,5,6<br>,28,31 | 7,8,25,26,<br>27,29,30,3<br>2  | 4 P52590,Q09030,Q4KLZ6,Q63532                                                                                                                  |
| 39 | 1,2,3,4,5,6<br>,28,32 | 7,8,25,26,<br>27,29,30,3<br>1  | 5 P52590,Q09030,Q4KLZ6,Q9QX74,Q9WTT6                                                                                                           |
| 40 | 1,2,3,4,5,6<br>,29,30 | 7,8,25,26,<br>27,28,31,3<br>2  | 11 P02783,P21588,P26342,P42854,P52590,P84039,Q4KLZ6,Q5RJR2,Q6IG02,Q9QWN8,Q9WTT6                                                                |
| 41 | 1,2,3,4,5,6<br>,29,31 | 7,8,25,26,<br>27,28,30,3<br>2  | 6 P02783,P52590,Q4KLZ6,Q5RJR2,Q9QWN8,Q9WTT6                                                                                                    |
| 42 | 1,2,3,4,5,6<br>,29,32 | 7,8,25,26,<br>27,28,30,3<br>1  | 7 O55145,P02783,P26342,P42854,P52590,Q4KLZ6,Q9WTT6                                                                                             |
| 43 | 1,2,3,4,5,6<br>,30,31 | 7,8,25,26,<br>27,28,29,3<br>2  | 20 P08010,P20646,P26342,P30120,P33436,P47727,P52590,P97584,Q09030,Q4KLZ6,Q5RJR2,Q63532,Q6AYR9,Q6P6R2,Q812E4,Q8CFN2,Q9QWN8,Q9QX74,Q9WTT6,Q9Z2L0 |
| 44 | 1,2,3,4,5,6<br>,30,32 | 7,8,25,26,<br>27,28,29,3<br>1  | 11 O55145,P20646,P26342,P52590,P97584,Q09030,Q4KLZ6,Q5I0J9,Q6P6R2,Q9QX74,Q9WTT6                                                                |
| 45 | 1,2,3,4,5,6<br>,31,32 | 7,8,25,26,<br>27,28,29,3<br>0  | 11 P20646,P26342,P52590,P97584,Q09030,Q4G075,Q4KLZ6,Q63532,Q6P6R2,Q9QX74,Q9WTT6                                                                |
| 46 | 1,2,3,4,5,7<br>,8,25  | 6,26,27,28<br>,29,30,31,<br>32 | 4 P01681,P22006,Q4KLZ6,Q811M5                                                                                                                  |
| 47 | 1,2,3,4,5,7<br>,8,26  | 6,25,27,28<br>,29,30,31,<br>32 | 5 P20762,P97580,Q30KJ2,Q5RLM2,Q9WUW8                                                                                                           |
| 48 | 1,2,3,4,5,7<br>,8,27  | 6,25,26,28<br>,29,30,31,<br>32 | 12 P00731,P19218,P47967,P50116,P97580,Q03191,Q10758,Q30KJ2,Q4G075,Q5I0D1,Q5RLM2,Q66H69                                                         |
| 49 | 1,2,3,4,5,7<br>,8,28  | 6,25,26,27<br>,29,30,31,<br>32 | 6 D3ZUC6,P47967,P97840,Q5RLM2,Q811M5,Q9WUW8                                                                                                    |



|    |                       |                                |    |                                                                                                   |
|----|-----------------------|--------------------------------|----|---------------------------------------------------------------------------------------------------|
| 50 | 1,2,3,4,5,7<br>,8,29  | 6,25,26,27<br>,28,30,31,<br>32 | 7  | O70594,P22006,P47967,P62804,P97840,Q5RJR2,Q9WUW8                                                  |
| 51 | 1,2,3,4,5,7<br>,8,30  | 6,25,26,27<br>,28,29,31,<br>32 | 14 | O88797,P05539,P19218,P97580,Q4FZU2,Q5RJR2,Q6IFU7,Q6IFU8,Q6IFW6,Q6IG02,Q6IG05,Q6IMF3,Q6P6Q2,Q9WUW8 |
| 52 | 1,2,3,4,5,7<br>,8,31  | 6,25,26,27<br>,28,29,30,<br>32 | 5  | P20766,P36376,Q5RJR2,Q5RLM2,Q811M5                                                                |
| 53 | 1,2,3,4,5,7<br>,8,32  | 6,25,26,27<br>,28,29,30,<br>31 | 4  | P01681,P05539,Q811M5,Q9WUW8                                                                       |
| 54 | 1,2,3,4,5,7<br>,25,26 | 6,8,27,28,<br>29,30,31,3<br>2  | 2  | P22006,Q4KLZ6                                                                                     |
| 55 | 1,2,3,4,5,7<br>,25,27 | 6,8,26,28,<br>29,30,31,3<br>2  | 3  | Q03191,Q4KLZ6,Q63474                                                                              |
| 56 | 1,2,3,4,5,7<br>,25,28 | 6,8,26,27,<br>29,30,31,3<br>2  | 2  | Q4KLZ6,Q811M5                                                                                     |
| 57 | 1,2,3,4,5,7<br>,25,29 | 6,8,26,27,<br>28,30,31,3<br>2  | 3  | P22006,Q4KLZ6,Q9QWN8                                                                              |
| 58 | 1,2,3,4,5,7<br>,25,30 | 6,8,26,27,<br>28,29,31,3<br>2  | 8  | Q4FZU2,Q4KLZ6,Q6AYR9,Q6IFW6,Q6P6Q2,Q6P6R2,Q8CFN2,Q9QWN8                                           |
| 59 | 1,2,3,4,5,7<br>,25,31 | 6,8,26,27,<br>28,29,30,3<br>2  | 6  | P29315,Q4KLZ6,Q6AYR9,Q811M5,Q8CFN2,Q9QWN8                                                         |
| 60 | 1,2,3,4,5,7<br>,25,32 | 6,8,26,27,<br>28,29,30,3<br>1  | 4  | P01681,Q4KLZ6,Q6P6R2,Q811M5                                                                       |
| 61 | 1,2,3,4,5,7<br>,26,27 | 6,8,25,28,<br>29,30,31,3<br>2  | 7  | P21588,P47967,P97840,Q03191,Q5I0D1,Q5RLM2,Q9JJ50                                                  |
| 62 | 1,2,3,4,5,7<br>,26,28 | 6,8,25,27,<br>29,30,31,3<br>2  | 3  | P47967,P97840,Q5RLM2                                                                              |

|    |                       |                               |                                                                                 |
|----|-----------------------|-------------------------------|---------------------------------------------------------------------------------|
| 63 | 1,2,3,4,5,7<br>,26,29 | 6,8,25,27,<br>28,30,31,3<br>2 | 4 P22006,P47967,P97840,Q9WUW8                                                   |
| 64 | 1,2,3,4,5,7<br>,26,30 | 6,8,25,27,<br>28,29,31,3<br>2 | 6 P21588,P36374,P97840,Q6AYR9,Q812E4,Q9WUW8                                     |
| 65 | 1,2,3,4,5,7<br>,26,31 | 6,8,25,27,<br>28,29,30,3<br>2 | 5 P20766,Q5RLM2,Q6AYR9,Q812E4,Q8CFN2                                            |
| 66 | 1,2,3,4,5,7<br>,26,32 | 6,8,25,27,<br>28,29,30,3<br>1 | 0                                                                               |
| 67 | 1,2,3,4,5,7<br>,27,28 | 6,8,25,26,<br>29,30,31,3<br>2 | 5 P47967,P97840,Q03191,Q5I0D1,Q5RLM2                                            |
| 68 | 1,2,3,4,5,7<br>,27,29 | 6,8,25,26,<br>28,30,31,3<br>2 | 5 P19223,P47967,P97840,Q03191,Q5I0D1                                            |
| 69 | 1,2,3,4,5,7<br>,27,30 | 6,8,25,26,<br>28,29,31,3<br>2 | 11 P00731,P19218,P21588,P47967,P70549,P84039,P97840,Q03191,Q6IFW6,Q6IG02,Q6P6Q2 |
| 70 | 1,2,3,4,5,7<br>,27,31 | 6,8,25,26,<br>28,29,30,3<br>2 | 3 P20766,P80299,Q03191                                                          |
| 71 | 1,2,3,4,5,7<br>,27,32 | 6,8,25,26,<br>28,29,30,3<br>1 | 1 Q03191                                                                        |
| 72 | 1,2,3,4,5,7<br>,28,29 | 6,8,25,26,<br>27,30,31,3<br>2 | 4 P47967,P54921,P97840,Q9WUW8                                                   |
| 73 | 1,2,3,4,5,7<br>,28,30 | 6,8,25,26,<br>27,29,31,3<br>2 | 4 P19218,P47967,P97840,Q9WUW8                                                   |
| 74 | 1,2,3,4,5,7<br>,28,31 | 6,8,25,26,<br>27,29,30,3<br>2 | 3 P97840,Q5RLM2,Q811M5                                                          |
| 75 | 1,2,3,4,5,7<br>,28,32 | 6,8,25,26,<br>27,29,30,3<br>1 | 3 P47967,P97840,Q811M5                                                          |

|    |                       |                               |    |                                                                                                          |
|----|-----------------------|-------------------------------|----|----------------------------------------------------------------------------------------------------------|
| 76 | 1,2,3,4,5,7<br>,29,30 | 6,8,25,26,<br>27,28,31,3<br>2 | 10 | P17046,P26342,P47967,P84039,P97840,Q6IFW6,Q6IG02,Q6P6Q2,Q9QWN8,Q9WUW8                                    |
| 77 | 1,2,3,4,5,7<br>,29,31 | 6,8,25,26,<br>27,28,30,3<br>2 | 2  | P26342,Q9QWN8                                                                                            |
| 78 | 1,2,3,4,5,7<br>,29,32 | 6,8,25,26,<br>27,28,30,3<br>1 | 4  | P26342,P47967,P97840,Q9WUW8                                                                              |
| 79 | 1,2,3,4,5,7<br>,30,31 | 6,8,25,26,<br>27,28,29,3<br>2 | 7  | P26342,Q5RJR2,Q6AYR9,Q6P6R2,Q812E4,Q8CFN2,Q9QWN8                                                         |
| 80 | 1,2,3,4,5,7<br>,30,32 | 6,8,25,26,<br>27,28,29,3<br>1 | 4  | P26342,P70549,Q6P6R2,Q9WUW8                                                                              |
| 81 | 1,2,3,4,5,7<br>,31,32 | 6,8,25,26,<br>27,28,29,3<br>0 | 4  | P26342,P80299,Q6P6R2,Q811M5                                                                              |
| 82 | 1,2,3,4,5,8<br>,25,26 | 6,7,27,28,<br>29,30,31,3<br>2 | 5  | P01681,P22006,P97580,Q30KJ2,Q4KLZ6                                                                       |
| 83 | 1,2,3,4,5,8<br>,25,27 | 6,7,26,28,<br>29,30,31,3<br>2 | 10 | P01681,P01835,P22006,P36376,P97580,Q03191,Q10758,Q30KJ2,Q4KLZ6,Q6DGG1                                    |
| 84 | 1,2,3,4,5,8<br>,25,28 | 6,7,26,27,<br>29,30,31,3<br>2 | 5  | P01681,P36376,P36860,Q4KLZ6,Q811M5                                                                       |
| 85 | 1,2,3,4,5,8<br>,25,29 | 6,7,26,27,<br>28,30,31,3<br>2 | 3  | P01681,P22006,Q4KLZ6                                                                                     |
| 86 | 1,2,3,4,5,8<br>,25,30 | 6,7,26,27,<br>28,29,31,3<br>2 | 15 | O88797,P01681,P05539,P22006,P97580,Q05511,Q4FZU2,Q4KLZ6,Q6IFU7,Q6IFU8,Q6IFW6,Q6IG02,Q6IG05,Q6IMF3,Q6P6Q2 |
| 87 | 1,2,3,4,5,8<br>,25,31 | 6,7,26,27,<br>28,29,30,3<br>2 | 5  | P01681,P29315,P36376,Q4KLZ6,Q811M5                                                                       |
| 88 | 1,2,3,4,5,8<br>,25,32 | 6,7,26,27,<br>28,29,30,3<br>1 | 4  | P01681,P05539,Q4KLZ6,Q811M5                                                                              |

|     |                       |                               |    |                                                                                                                 |
|-----|-----------------------|-------------------------------|----|-----------------------------------------------------------------------------------------------------------------|
| 89  | 1,2,3,4,5,8<br>,26,27 | 6,7,25,28,<br>29,30,31,3<br>2 | 5  | P20762,P97580,Q10758,Q30KJ2,Q5BJY9                                                                              |
| 90  | 1,2,3,4,5,8<br>,26,28 | 6,7,25,27,<br>29,30,31,3<br>2 | 2  | P97580,Q5RLM2                                                                                                   |
| 91  | 1,2,3,4,5,8<br>,26,29 | 6,7,25,27,<br>28,30,31,3<br>2 | 3  | P22006,P97580,Q5RJR2                                                                                            |
| 92  | 1,2,3,4,5,8<br>,26,30 | 6,7,25,27,<br>28,29,31,3<br>2 | 14 | O88797,P05539,P20762,P97580,Q30KJ2,Q4FZU2,Q5RJR2,Q6IFU7,Q6IFU8,Q6IFW6,Q6IG02,Q6IG05,Q6IMF3,Q6P6Q2               |
| 93  | 1,2,3,4,5,8<br>,26,31 | 6,7,25,27,<br>28,29,30,3<br>2 | 5  | P05539,P36376,P97580,Q5RJR2,Q5RLM2                                                                              |
| 94  | 1,2,3,4,5,8<br>,26,32 | 6,7,25,27,<br>28,29,30,3<br>1 | 3  | P01681,P05539,P97580                                                                                            |
| 95  | 1,2,3,4,5,8<br>,27,28 | 6,7,25,26,<br>29,30,31,3<br>2 | 6  | P19218,P36376,P47967,P97580,Q10758,Q30KJ2                                                                       |
| 96  | 1,2,3,4,5,8<br>,27,29 | 6,7,25,26,<br>28,30,31,3<br>2 | 6  | P00731,P19223,P22006,P97580,Q10758,Q30KJ2                                                                       |
| 97  | 1,2,3,4,5,8<br>,27,30 | 6,7,25,26,<br>28,29,31,3<br>2 | 16 | O88797,P00731,P19218,P70549,P97580,Q03191,Q10758,Q30KJ2,Q4FZU2,Q6IFU7,Q6IFU8,Q6IFW6,Q6IG02,Q6IG05,Q6IMF3,Q6P6Q2 |
| 98  | 1,2,3,4,5,8<br>,27,31 | 6,7,25,26,<br>28,29,30,3<br>2 | 7  | P00731,P23739,P36376,P97580,Q03191,Q10758,Q30KJ2                                                                |
| 99  | 1,2,3,4,5,8<br>,27,32 | 6,7,25,26,<br>28,29,30,3<br>1 | 5  | P01681,P97580,Q03191,Q10758,Q30KJ2                                                                              |
| 100 | 1,2,3,4,5,8<br>,28,29 | 6,7,25,26,<br>27,30,31,3<br>2 | 1  | P47967                                                                                                          |
| 101 | 1,2,3,4,5,8<br>,28,30 | 6,7,25,26,<br>27,29,31,3<br>2 | 10 | O88797,P19218,Q4FZU2,Q6IFU7,Q6IFU8,Q6IFW6,Q6IG02,Q6IG05,Q6IMF3,Q6P6Q2                                           |

|     |                        |                               |                                                                                                             |
|-----|------------------------|-------------------------------|-------------------------------------------------------------------------------------------------------------|
| 102 | 1,2,3,4,5,8<br>,28,31  | 6,7,25,26,<br>27,29,30,3<br>2 | 2 P36376,Q811M5                                                                                             |
| 103 | 1,2,3,4,5,8<br>,28,32  | 6,7,25,26,<br>27,29,30,3<br>1 | 2 P01681,Q811M5                                                                                             |
| 104 | 1,2,3,4,5,8<br>,29,30  | 6,7,25,26,<br>27,28,31,3<br>2 | 11 O88797,P22006,Q4FZU2,Q5RJR2,Q6IFU7,Q6IFU8,Q6IFW6,Q6IG02,Q6IG05,Q6IMF3,Q6P6Q2                             |
| 105 | 1,2,3,4,5,8<br>,29,31  | 6,7,25,26,<br>27,28,30,3<br>2 | 2 P36376,Q5RJR2                                                                                             |
| 106 | 1,2,3,4,5,8<br>,29,32  | 6,7,25,26,<br>27,28,30,3<br>1 | 1 P01681                                                                                                    |
| 107 | 1,2,3,4,5,8<br>,30,31  | 6,7,25,26,<br>27,28,29,3<br>2 | 12 O88797,P05539,P36376,Q4FZU2,Q5RJR2,Q6IFU7,Q6IFU8,Q6IFW6,Q6IG02,Q6IG05,Q6IMF3,Q6P6Q2                      |
| 108 | 1,2,3,4,5,8<br>,30,32  | 6,7,25,26,<br>27,28,29,3<br>1 | 15 O88797,P01681,P05539,P26342,P70549,P97615,Q4FZU2,Q6IFU7,Q6IFU8,Q6IFW6,Q6IG02,Q6IG05,Q6IMF3,Q6P6Q2,Q6P6R2 |
| 109 | 1,2,3,4,5,8<br>,31,32  | 6,7,25,26,<br>27,28,29,3<br>0 | 4 P01681,P05539,P36376,Q811M5                                                                               |
| 110 | 1,2,3,4,5,2<br>5,26,27 | 6,7,8,28,2<br>9,30,31,32      | 2 Q03191,Q4KLZ6                                                                                             |
| 111 | 1,2,3,4,5,2<br>5,26,28 | 6,7,8,27,2<br>9,30,31,32      | 1 Q4KLZ6                                                                                                    |
| 112 | 1,2,3,4,5,2<br>5,26,29 | 6,7,8,27,2<br>8,30,31,32      | 3 P22006,Q4KLZ6,Q9QZK9                                                                                      |
| 113 | 1,2,3,4,5,2<br>5,26,30 | 6,7,8,27,2<br>8,29,31,32      | 8 P08723,P47727,P97523,Q06000,Q4KLZ6,Q63617,Q6AYR9,Q812E4                                                   |
| 114 | 1,2,3,4,5,2<br>5,26,31 | 6,7,8,27,2<br>8,29,30,32      | 8 P18298,P29315,Q4KLZ6,Q63617,Q6AYR9,Q812E4,Q8CFN2,Q9ZZL0                                                   |
| 115 | 1,2,3,4,5,2<br>5,26,32 | 6,7,8,27,2<br>8,29,30,31      | 3 P01681,Q06000,Q4KLZ6                                                                                      |
| 116 | 1,2,3,4,5,2<br>5,27,28 | 6,7,8,26,2<br>9,30,31,32      | 2 Q03191,Q4KLZ6                                                                                             |
| 117 | 1,2,3,4,5,2<br>5,27,29 | 6,7,8,26,2<br>8,30,31,32      | 4 O89117,P22006,Q03191,Q4KLZ6                                                                               |

|     |                        |                          |    |                                                                                                                               |
|-----|------------------------|--------------------------|----|-------------------------------------------------------------------------------------------------------------------------------|
| 118 | 1,2,3,4,5,2<br>5,27,30 | 6,7,8,26,2<br>8,29,31,32 | 9  | P70549,Q03191,Q4FZU2,Q4KLZ6,Q6IFW6,Q6IG02,Q6P6Q2,Q6P6R2,Q9QX74                                                                |
| 119 | 1,2,3,4,5,2<br>5,27,31 | 6,7,8,26,2<br>8,29,30,32 | 5  | P23739,P29315,Q03191,Q4KLZ6,Q9QYP1                                                                                            |
| 120 | 1,2,3,4,5,2<br>5,27,32 | 6,7,8,26,2<br>8,29,30,31 | 6  | P01681,P35745,Q03191,Q4KLZ6,Q6P6R2,Q9QX74                                                                                     |
| 121 | 1,2,3,4,5,2<br>5,28,29 | 6,7,8,26,2<br>7,30,31,32 | 1  | Q4KLZ6                                                                                                                        |
| 122 | 1,2,3,4,5,2<br>5,28,30 | 6,7,8,26,2<br>7,29,31,32 | 2  | Q4KLZ6,Q9QX74                                                                                                                 |
| 123 | 1,2,3,4,5,2<br>5,28,31 | 6,7,8,26,2<br>7,29,30,32 | 3  | P29315,Q4KLZ6,Q811M5                                                                                                          |
| 124 | 1,2,3,4,5,2<br>5,28,32 | 6,7,8,26,2<br>7,29,30,31 | 4  | P01681,Q4KLZ6,Q811M5,Q9QX74                                                                                                   |
| 125 | 1,2,3,4,5,2<br>5,29,30 | 6,7,8,26,2<br>7,28,31,32 | 7  | P07150,P22006,Q4KLZ6,Q6IFW6,Q6IG02,Q6P6Q2,Q9QWN8                                                                              |
| 126 | 1,2,3,4,5,2<br>5,29,31 | 6,7,8,26,2<br>7,28,30,32 | 4  | P07150,P29315,Q4KLZ6,Q9QWN8                                                                                                   |
| 127 | 1,2,3,4,5,2<br>5,29,32 | 6,7,8,26,2<br>7,28,30,31 | 2  | P01681,Q4KLZ6                                                                                                                 |
| 128 | 1,2,3,4,5,2<br>5,30,31 | 6,7,8,26,2<br>7,28,29,32 | 18 | P07150,P08723,P22283,P29315,P30120,P47727,Q4KLZ6,Q63617,Q6AYR9,Q6IFW6,Q6IG02,Q6P6R2,Q812E4,Q8CFN2,Q9QWN8,Q9QX74,Q9WTT6,Q9Z2L0 |
| 129 | 1,2,3,4,5,2<br>5,30,32 | 6,7,8,26,2<br>7,28,29,31 | 8  | P01681,P26342,P70549,P97523,Q4KLZ6,Q6P6R2,Q9QX74,Q9WTT6                                                                       |
| 130 | 1,2,3,4,5,2<br>5,31,32 | 6,7,8,26,2<br>7,28,29,30 | 8  | P01681,P29315,P97584,Q4KLZ6,Q6P6R2,Q811M5,Q9QX74,Q9WTT6                                                                       |
| 131 | 1,2,3,4,5,2<br>6,27,28 | 6,7,8,25,2<br>9,30,31,32 | 4  | P21588,P47967,P97840,Q5RLM2                                                                                                   |
| 132 | 1,2,3,4,5,2<br>6,27,29 | 6,7,8,25,2<br>8,30,31,32 | 2  | P21588,Q9JJ50                                                                                                                 |
| 133 | 1,2,3,4,5,2<br>6,27,30 | 6,7,8,25,2<br>8,29,31,32 | 2  | P21588,Q6IG02                                                                                                                 |
| 134 | 1,2,3,4,5,2<br>6,27,31 | 6,7,8,25,2<br>8,29,30,32 | 1  | Q03191                                                                                                                        |
| 135 | 1,2,3,4,5,2<br>6,27,32 | 6,7,8,25,2<br>8,29,30,31 | 2  | Q03191,Q9JJ50                                                                                                                 |
| 136 | 1,2,3,4,5,2<br>6,28,29 | 6,7,8,25,2<br>7,30,31,32 | 2  | P47967,P97840                                                                                                                 |
| 137 | 1,2,3,4,5,2<br>6,28,30 | 6,7,8,25,2<br>7,29,31,32 | 1  | P21588                                                                                                                        |

|     |                        |                          |                                                                                 |
|-----|------------------------|--------------------------|---------------------------------------------------------------------------------|
| 138 | 1,2,3,4,5,2<br>6,28,31 | 6,7,8,25,2<br>7,29,30,32 | 1 Q5RLM2                                                                        |
| 139 | 1,2,3,4,5,2<br>6,28,32 | 6,7,8,25,2<br>7,29,30,31 | 0                                                                               |
| 140 | 1,2,3,4,5,2<br>6,29,30 | 6,7,8,25,2<br>7,28,31,32 | 2 P21588,Q6IG02                                                                 |
| 141 | 1,2,3,4,5,2<br>6,29,31 | 6,7,8,25,2<br>7,28,30,32 | 0                                                                               |
| 142 | 1,2,3,4,5,2<br>6,29,32 | 6,7,8,25,2<br>7,28,30,31 | 0                                                                               |
| 143 | 1,2,3,4,5,2<br>6,30,31 | 6,7,8,25,2<br>7,28,29,32 | 11 P08723,P0C0A9,P22283,P30120,P47727,Q63617,Q6AYR9,Q812E4,Q8CFN2,Q9QW07,Q9Z2L0 |
| 144 | 1,2,3,4,5,2<br>6,30,32 | 6,7,8,25,2<br>7,28,29,31 | 1 Q812E4                                                                        |
| 145 | 1,2,3,4,5,2<br>6,31,32 | 6,7,8,25,2<br>7,28,29,30 | 3 Q4G075,Q812E4,Q9Z2L0                                                          |
| 146 | 1,2,3,4,5,2<br>7,28,29 | 6,7,8,25,2<br>6,30,31,32 | 3 P47967,P97840,Q9WVK7                                                          |
| 147 | 1,2,3,4,5,2<br>7,28,30 | 6,7,8,25,2<br>6,29,31,32 | 5 P19218,P21588,P70549,Q6IG02,Q6P6Q2                                            |
| 148 | 1,2,3,4,5,2<br>7,28,31 | 6,7,8,25,2<br>6,29,30,32 | 1 Q03191                                                                        |
| 149 | 1,2,3,4,5,2<br>7,28,32 | 6,7,8,25,2<br>6,29,30,31 | 3 Q03191,Q62761;Q62762;Q62763,Q9QX74                                            |
| 150 | 1,2,3,4,5,2<br>7,29,30 | 6,7,8,25,2<br>6,28,31,32 | 8 P00731,P21588,P84039,Q6IFU8,Q6IFW6,Q6IG02,Q6IMF3,Q6P6Q2                       |
| 151 | 1,2,3,4,5,2<br>7,29,31 | 6,7,8,25,2<br>6,28,30,32 | 1 Q03191                                                                        |
| 152 | 1,2,3,4,5,2<br>7,29,32 | 6,7,8,25,2<br>6,28,30,31 | 1 Q03191                                                                        |
| 153 | 1,2,3,4,5,2<br>7,30,31 | 6,7,8,25,2<br>6,28,29,32 | 8 P30120,Q03191,Q6IFW6,Q6IG02,Q6P6Q2,Q6P6R2,Q9QW07,Q9WTT6                       |
| 154 | 1,2,3,4,5,2<br>7,30,32 | 6,7,8,25,2<br>6,28,29,31 | 7 P70549,Q03191,Q6IG02,Q6P6Q2,Q6P6R2,Q9QX74,Q9WTT6                              |
| 155 | 1,2,3,4,5,2<br>7,31,32 | 6,7,8,25,2<br>6,28,29,30 | 6 P23739,P80299,Q03191,Q6P6R2,Q9QX74,Q9WTT6                                     |
| 156 | 1,2,3,4,5,2<br>8,29,30 | 6,7,8,25,2<br>6,27,31,32 | 2 P97840,Q6IG02                                                                 |
| 157 | 1,2,3,4,5,2<br>8,29,31 | 6,7,8,25,2<br>6,27,30,32 | 0                                                                               |

|     |                        |                                |                                                                                                                                  |
|-----|------------------------|--------------------------------|----------------------------------------------------------------------------------------------------------------------------------|
| 158 | 1,2,3,4,5,2<br>8,29,32 | 6,7,8,25,2<br>6,27,30,31       | 0                                                                                                                                |
| 159 | 1,2,3,4,5,2<br>8,30,31 | 6,7,8,25,2<br>6,27,29,32       | 2 Q9QX74,Q9WTT6                                                                                                                  |
| 160 | 1,2,3,4,5,2<br>8,30,32 | 6,7,8,25,2<br>6,27,29,31       | 3 P70549,Q9QX74,Q9WTT6                                                                                                           |
| 161 | 1,2,3,4,5,2<br>8,31,32 | 6,7,8,25,2<br>6,27,29,30       | 3 Q811M5,Q9QX74,Q9WTT6                                                                                                           |
| 162 | 1,2,3,4,5,2<br>9,30,31 | 6,7,8,25,2<br>6,27,28,32       | 8 P07150,P26342,Q5RJR2,Q6AYR9,Q6IFW6,Q6IG02,Q9QWN8,Q9WTT6                                                                        |
| 163 | 1,2,3,4,5,2<br>9,30,32 | 6,7,8,25,2<br>6,27,28,31       | 4 P07150,P26342,Q6IG02,Q9WTT6                                                                                                    |
| 164 | 1,2,3,4,5,2<br>9,31,32 | 6,7,8,25,2<br>6,27,28,30       | 3 P07150,P26342,Q9WTT6                                                                                                           |
| 165 | 1,2,3,4,5,3<br>0,31,32 | 6,7,8,25,2<br>6,27,28,29       | 13 P07150,P20646,P26342,P47727,P63081,P70549,P97584,Q4G075,Q6P6R2,Q812E4,Q9QW07,Q9QX74,Q9WTT6                                    |
| 166 | 1,2,3,4,6,7<br>,8,25   | 5,26,27,28<br>,29,30,31,<br>32 | 14 G3V686,O54800;Q5DWV2,O70417,P02631,P06911,P12020,P97580,Q09030,Q30KJ2,Q4KLZ6,Q4V885,Q63532,Q99PP0,Q9QZQ5                      |
| 167 | 1,2,3,4,6,7<br>,8,26   | 5,25,27,28<br>,29,30,31,<br>32 | 15 G3V686,O54800;Q5DWV2,P02631,P02783,P06911,P08649,P11598,P20761,P20762,P97580,Q30KJ2,Q63532,Q64240,Q99041,Q99PP0               |
| 168 | 1,2,3,4,6,7<br>,8,27   | 5,25,26,28<br>,29,30,31,<br>32 | 17 O70417,P02631,P02783,P06911,P11598,P15399,P19218,P22273,P22282,P50115,P97580,Q10758,Q30KJ2,Q62894,Q66H69,Q99041,Q9QZQ5        |
| 169 | 1,2,3,4,6,7<br>,8,28   | 5,25,26,27<br>,29,30,31,<br>32 | 18 O70417,P02631,P06911,P11598,P12020,P21674,P22273,P97580,Q09030,Q30KJ2,Q63532,Q63617,Q68FX1,Q99041,Q99PP0,Q9JI85,Q9QW07,Q9QZQ5 |
| 170 | 1,2,3,4,6,7<br>,8,29   | 5,25,26,27<br>,28,30,31,<br>32 | 13 O70594,P02631,P02783,P06911,P11598,P12020,P21674,P42854,P62804,P97580,Q30KJ2,Q4V885,Q99041                                    |
| 171 | 1,2,3,4,6,7<br>,8,30   | 5,25,26,27<br>,28,29,31,<br>32 | 17 O54800;Q5DWV2,O70417,P02631,P02783,P06911,P19218,P97580,P97615,Q09030,Q30KJ2,Q4V885,Q5RJR2,Q63532,Q6IFU7,Q6IFW6,Q6IG05,Q99041 |
| 172 | 1,2,3,4,6,7<br>,8,31   | 5,25,26,27<br>,28,29,30,<br>32 | 13 P02783,P06911,P12020,P20766,P46844,P97580,Q05702,Q09030,Q30KJ2,Q5RJR2,Q63532,Q99P0,Q9QX79                                     |
| 173 | 1,2,3,4,6,7<br>,8,32   | 5,25,26,27<br>,28,29,30,<br>31 | 16 O54800;Q5DWV2,O55004,P02454,P02631,P02783,P06911,P11598,P97580,P97615,Q09030,Q30KJ2,Q4V885,Q63532,Q99041,Q99PP0,Q9QZQ5        |



|     |                       |                               |                                                                  |
|-----|-----------------------|-------------------------------|------------------------------------------------------------------|
| 174 | 1,2,3,4,6,7<br>,25,26 | 5,8,27,28,<br>29,30,31,3<br>2 | 3 O54800;Q5DWV2,Q4KLZ6,Q9WVH8                                    |
| 175 | 1,2,3,4,6,7<br>,25,27 | 5,8,26,28,<br>29,30,31,3<br>2 | 2 O54800;Q5DWV2,Q4KLZ6                                           |
| 176 | 1,2,3,4,6,7<br>,25,28 | 5,8,26,27,<br>29,30,31,3<br>2 | 4 O54800;Q5DWV2,Q09030,Q4KLZ6,Q62975                             |
| 177 | 1,2,3,4,6,7<br>,25,29 | 5,8,26,27,<br>28,30,31,3<br>2 | 5 O54800;Q5DWV2,P02783,P42854,Q4KLZ6,Q9QWN8                      |
| 178 | 1,2,3,4,6,7<br>,25,30 | 5,8,26,27,<br>28,29,31,3<br>2 | 6 O54800;Q5DWV2,P26342,Q09030,Q4KLZ6,Q80WL1,Q9QWN8               |
| 179 | 1,2,3,4,6,7<br>,25,31 | 5,8,26,27,<br>28,29,30,3<br>2 | 8 O54800;Q5DWV2,P20766,P29315,Q09030,Q4KLZ6,Q63532,Q9QWN8,Q9WVH8 |
| 180 | 1,2,3,4,6,7<br>,25,32 | 5,8,26,27,<br>28,29,30,3<br>1 | 4 O54800;Q5DWV2,P26342,Q09030,Q4KLZ6                             |
| 181 | 1,2,3,4,6,7<br>,26,27 | 5,8,25,28,<br>29,30,31,3<br>2 | 5 O54800;Q5DWV2,P02783,P09656,P21588,Q62894                      |
| 182 | 1,2,3,4,6,7<br>,26,28 | 5,8,25,27,<br>29,30,31,3<br>2 | 1 P11598                                                         |
| 183 | 1,2,3,4,6,7<br>,26,29 | 5,8,25,27,<br>28,30,31,3<br>2 | 4 O54800;Q5DWV2,P02783,P09656,P42854                             |
| 184 | 1,2,3,4,6,7<br>,26,30 | 5,8,25,27,<br>28,29,31,3<br>2 | 4 O54800;Q5DWV2,P02783,P21588,Q80WL1                             |
| 185 | 1,2,3,4,6,7<br>,26,31 | 5,8,25,27,<br>28,29,30,3<br>2 | 7 O54800;Q5DWV2,P02783,P20766,P57113,Q63532,Q9QX79,Q9WVH8        |
| 186 | 1,2,3,4,6,7<br>,26,32 | 5,8,25,27,<br>28,29,30,3<br>1 | 3 O54800;Q5DWV2,P02783,P97615                                    |

|     |                       |                               |                                                                                            |
|-----|-----------------------|-------------------------------|--------------------------------------------------------------------------------------------|
| 187 | 1,2,3,4,6,7<br>,27,28 | 5,8,25,26,<br>29,30,31,3<br>2 | 5 P09656,P11598,P11762,Q63617,Q68FX1                                                       |
| 188 | 1,2,3,4,6,7<br>,27,29 | 5,8,25,26,<br>28,30,31,3<br>2 | 5 P02783,P09656,P19223,P42854,P80299                                                       |
| 189 | 1,2,3,4,6,7<br>,27,30 | 5,8,25,26,<br>28,29,31,3<br>2 | 4 P02783,P19218,P21588,Q80WL1                                                              |
| 190 | 1,2,3,4,6,7<br>,27,31 | 5,8,25,26,<br>28,29,30,3<br>2 | 5 P02783,P20766,P80299,Q62894,Q63532                                                       |
| 191 | 1,2,3,4,6,7<br>,27,32 | 5,8,25,26,<br>28,29,30,3<br>1 | 4 O54800;Q5DWV2,P02783,P11598,P80299                                                       |
| 192 | 1,2,3,4,6,7<br>,28,29 | 5,8,25,26,<br>27,30,31,3<br>2 | 7 P02783,P09656,P11598,P21674,P42854,P47967,Q63617                                         |
| 193 | 1,2,3,4,6,7<br>,28,30 | 5,8,25,26,<br>27,29,31,3<br>2 | 1 Q80WL1                                                                                   |
| 194 | 1,2,3,4,6,7<br>,28,31 | 5,8,25,26,<br>27,29,30,3<br>2 | 3 P11598,P80299,Q63532                                                                     |
| 195 | 1,2,3,4,6,7<br>,28,32 | 5,8,25,26,<br>27,29,30,3<br>1 | 1 P11598                                                                                   |
| 196 | 1,2,3,4,6,7<br>,29,30 | 5,8,25,26,<br>27,28,31,3<br>2 | 6 O54800;Q5DWV2,P02783,P17046,P26342,Q80WL1,Q9QWN8                                         |
| 197 | 1,2,3,4,6,7<br>,29,31 | 5,8,25,26,<br>27,28,30,3<br>2 | 5 P02783,P20766,P26342,P80299,Q9QWN8                                                       |
| 198 | 1,2,3,4,6,7<br>,29,32 | 5,8,25,26,<br>27,28,30,3<br>1 | 6 O54800;Q5DWV2,O55145,P02783,P26342,P42854,P80299                                         |
| 199 | 1,2,3,4,6,7<br>,30,31 | 5,8,25,26,<br>27,28,29,3<br>2 | 11 O54800;Q5DWV2,P02783,P06760,P20766,P26342,Q09030,Q63532,Q6P6R2,Q8CFN2,Q9QWN8,<br>Q9QX79 |

|     |                       |                               |    |                                                                                                   |
|-----|-----------------------|-------------------------------|----|---------------------------------------------------------------------------------------------------|
| 200 | 1,2,3,4,6,7<br>,30,32 | 5,8,25,26,<br>27,28,29,3<br>1 | 6  | O54800;Q5DWV2,P02783,P06760,P26342,P97615,Q6P6R2                                                  |
| 201 | 1,2,3,4,6,7<br>,31,32 | 5,8,25,26,<br>27,28,29,3<br>0 | 10 | O54800;Q5DWV2,P02783,P06760,P20766,P26342,P80299,P97615,Q63532,Q6P6R2,Q9QX79                      |
| 202 | 1,2,3,4,6,8<br>,25,26 | 5,7,27,28,<br>29,30,31,3<br>2 | 11 | G3V686,O54800;Q5DWV2,P08649,P15399,P97580,Q05702,Q06000,Q09030,Q30KJ2,Q4KLZ6,Q99MH3               |
| 203 | 1,2,3,4,6,8<br>,25,27 | 5,7,26,28,<br>29,30,31,3<br>2 | 9  | P06911,P08649,P15399,P17559,P97580,Q09030,Q10758,Q30KJ2,Q4KLZ6                                    |
| 204 | 1,2,3,4,6,8<br>,25,28 | 5,7,26,27,<br>29,30,31,3<br>2 | 9  | P02631,P06911,P08649,P36860,P97580,Q09030,Q30KJ2,Q4KLZ6,Q9JI85                                    |
| 205 | 1,2,3,4,6,8<br>,25,29 | 5,7,26,27,<br>28,30,31,3<br>2 | 7  | O54800;Q5DWV2,P02783,P06911,P42854,P97580,Q30KJ2,Q4KLZ6                                           |
| 206 | 1,2,3,4,6,8<br>,25,30 | 5,7,26,27,<br>28,29,31,3<br>2 | 13 | G3V686,O54800;Q5DWV2,O70417,O88797,P06911,P97580,Q09030,Q30KJ2,Q4KLZ6,Q6IFU7,Q6IFW6,Q6IG02,Q6IG05 |
| 207 | 1,2,3,4,6,8<br>,25,31 | 5,7,26,27,<br>28,29,30,3<br>2 | 12 | G3V686,O54800;Q5DWV2,P06911,P12020,P29315,P36376,P97580,Q05702,Q09030,Q30KJ2,Q4KLZ6,Q63532        |
| 208 | 1,2,3,4,6,8<br>,25,32 | 5,7,26,27,<br>28,29,30,3<br>1 | 9  | G3V686,O54800;Q5DWV2,P01681,P02631,P08649,P97580,Q09030,Q30KJ2,Q4KLZ6                             |
| 209 | 1,2,3,4,6,8<br>,26,27 | 5,7,25,28,<br>29,30,31,3<br>2 | 10 | P02783,P08649,P09656,P15399,P17559,P20762,P97580,Q10758,Q30KJ2,Q5BJY9                             |
| 210 | 1,2,3,4,6,8<br>,26,28 | 5,7,25,27,<br>29,30,31,3<br>2 | 5  | P08649,P15399,P97580,Q30KJ2,Q9JI85                                                                |
| 211 | 1,2,3,4,6,8<br>,26,29 | 5,7,25,27,<br>28,30,31,3<br>2 | 7  | O54800;Q5DWV2,P02783,P08649,P09656,P42854,P97580,Q30KJ2                                           |
| 212 | 1,2,3,4,6,8<br>,26,30 | 5,7,25,27,<br>28,29,31,3<br>2 | 7  | O54800;Q5DWV2,P02783,P15399,P97580,P97615,Q30KJ2,Q99MH3                                           |

|     |                       |                               |    |                                                                                                          |
|-----|-----------------------|-------------------------------|----|----------------------------------------------------------------------------------------------------------|
| 213 | 1,2,3,4,6,8<br>,26,31 | 5,7,25,27,<br>28,29,30,3<br>2 | 7  | O54800;Q5DWV2,P02783,P97580,Q05702,Q30KJ2,Q63532,Q99MH3                                                  |
| 214 | 1,2,3,4,6,8<br>,26,32 | 5,7,25,27,<br>28,29,30,3<br>1 | 10 | O54800;Q5DWV2,O55004,P02783,P08649,P15399,P97580,P97615,Q05702,Q30KJ2,Q99MH3                             |
| 215 | 1,2,3,4,6,8<br>,27,28 | 5,7,25,26,<br>29,30,31,3<br>2 | 10 | P09656,P11762,P15399,P19218,P97580,Q10758,Q30KJ2,Q68FX1,Q9JI85,Q9WVK7                                    |
| 216 | 1,2,3,4,6,8<br>,27,29 | 5,7,25,26,<br>28,30,31,3<br>2 | 8  | P02783,P09656,P15399,P19223,P42854,P97580,Q10758,Q30KJ2                                                  |
| 217 | 1,2,3,4,6,8<br>,27,30 | 5,7,25,26,<br>28,29,31,3<br>2 | 15 | O70417,P00731,P02783,P09656,P15399,P19218,P97580,Q10758,Q30KJ2,Q6IFU7,Q6IFU8,Q6IFW6,Q6IG02,Q6IG05,Q6P6Q2 |
| 218 | 1,2,3,4,6,8<br>,27,31 | 5,7,25,26,<br>28,29,30,3<br>2 | 8  | P02783,P15399,P36376,P97580,Q05702,Q10758,Q30KJ2,Q63532                                                  |
| 219 | 1,2,3,4,6,8<br>,27,32 | 5,7,25,26,<br>28,29,30,3<br>1 | 7  | P02783,P15399,P97580,P98166,Q10758,Q30KJ2,Q9QZQ5                                                         |
| 220 | 1,2,3,4,6,8<br>,28,29 | 5,7,25,26,<br>27,30,31,3<br>2 | 7  | P02783,P09656,P21674,P42854,P97580,Q30KJ2,Q9JI85                                                         |
| 221 | 1,2,3,4,6,8<br>,28,30 | 5,7,25,26,<br>27,29,31,3<br>2 | 7  | O70417,P19218,P97580,Q09030,Q30KJ2,Q63532,Q6IFU7                                                         |
| 222 | 1,2,3,4,6,8<br>,28,31 | 5,7,25,26,<br>27,29,30,3<br>2 | 9  | P06911,P12020,P36376,P97580,Q05702,Q09030,Q30KJ2,Q63532,Q9JI85                                           |
| 223 | 1,2,3,4,6,8<br>,28,32 | 5,7,25,26,<br>27,29,30,3<br>1 | 4  | P97580,Q30KJ2,Q63532,Q9JI85                                                                              |
| 224 | 1,2,3,4,6,8<br>,29,30 | 5,7,25,26,<br>27,28,31,3<br>2 | 9  | O88797,P02783,P42854,P97580,Q30KJ2,Q5RJR2,Q6IFU7,Q6IFW6,Q6IG02                                           |
| 225 | 1,2,3,4,6,8<br>,29,31 | 5,7,25,26,<br>27,28,30,3<br>2 | 6  | P02783,P97580,Q05702,Q30KJ2,Q5RJR2,Q63532                                                                |

|     |                        |                               |                                                                                 |
|-----|------------------------|-------------------------------|---------------------------------------------------------------------------------|
| 226 | 1,2,3,4,6,8<br>,29,32  | 5,7,25,26,<br>27,28,30,3<br>1 | 5 O54800;Q5DWW2,P02783,P42854,P97580,Q30KJ2                                     |
| 227 | 1,2,3,4,6,8<br>,30,31  | 5,7,25,26,<br>27,28,29,3<br>2 | 9 P02783,P97580,P97615,Q05702,Q09030,Q30KJ2,Q5RJR2,Q63532,Q6IG05                |
| 228 | 1,2,3,4,6,8<br>,30,32  | 5,7,25,26,<br>27,28,29,3<br>1 | 10 O54800;Q5DWW2,O88797,P02783,P20646,P26342,P97580,P97615,Q09030,Q30KJ2,Q6IFU7 |
| 229 | 1,2,3,4,6,8<br>,31,32  | 5,7,25,26,<br>27,28,29,3<br>0 | 7 O54800;Q5DWW2,P02783,P97580,P97615,Q05702,Q09030,Q63532                       |
| 230 | 1,2,3,4,6,2<br>5,26,27 | 5,7,8,28,2<br>9,30,31,32      | 4 O54800;Q5DWW2,P09656,Q06000,Q4KLZ6                                            |
| 231 | 1,2,3,4,6,2<br>5,26,28 | 5,7,8,27,2<br>9,30,31,32      | 4 O54800;Q5DWW2,P08649,Q06000,Q4KLZ6                                            |
| 232 | 1,2,3,4,6,2<br>5,26,29 | 5,7,8,27,2<br>8,30,31,32      | 4 O54800;Q5DWW2,P02783,P09656,Q4KLZ6                                            |
| 233 | 1,2,3,4,6,2<br>5,26,30 | 5,7,8,27,2<br>8,29,31,32      | 6 O54800;Q5DWW2,P06760,Q06000,Q4KLZ6,Q812E4,Q99MH3                              |
| 234 | 1,2,3,4,6,2<br>5,26,31 | 5,7,8,27,2<br>8,29,30,32      | 6 O54800;Q5DWW2,P06760,P18298,P29315,Q4KLZ6,Q812E4                              |
| 235 | 1,2,3,4,6,2<br>5,26,32 | 5,7,8,27,2<br>8,29,30,31      | 4 O54800;Q5DWW2,P06760,Q06000,Q4KLZ6                                            |
| 236 | 1,2,3,4,6,2<br>5,27,28 | 5,7,8,26,2<br>9,30,31,32      | 3 P09656,P11762,Q4KLZ6                                                          |
| 237 | 1,2,3,4,6,2<br>5,27,29 | 5,7,8,26,2<br>8,30,31,32      | 4 P02783,P09656,P35745,Q4KLZ6                                                   |
| 238 | 1,2,3,4,6,2<br>5,27,30 | 5,7,8,26,2<br>8,29,31,32      | 5 O54800;Q5DWW2,P06760,P09656,Q4KLZ6,Q9QX74                                     |
| 239 | 1,2,3,4,6,2<br>5,27,31 | 5,7,8,26,2<br>8,29,30,32      | 4 P06760,P29315,Q4KLZ6,Q9QYP1                                                   |
| 240 | 1,2,3,4,6,2<br>5,27,32 | 5,7,8,26,2<br>8,29,30,31      | 5 O54800;Q5DWW2,P06760,P35745,Q4KLZ6,Q9QX74                                     |
| 241 | 1,2,3,4,6,2<br>5,28,29 | 5,7,8,26,2<br>7,30,31,32      | 2 P09656,Q4KLZ6                                                                 |
| 242 | 1,2,3,4,6,2<br>5,28,30 | 5,7,8,26,2<br>7,29,31,32      | 5 P06760,Q09030,Q4KLZ6,Q62975,Q9QX74                                            |
| 243 | 1,2,3,4,6,2<br>5,28,31 | 5,7,8,26,2<br>7,29,30,32      | 5 P06760,P29315,Q09030,Q4KLZ6,Q63532                                            |

|     |                        |                          |    |                                                                                     |
|-----|------------------------|--------------------------|----|-------------------------------------------------------------------------------------|
| 244 | 1,2,3,4,6,2<br>5,28,32 | 5,7,8,26,2<br>7,29,30,31 | 5  | O54800;Q5DWV2,P06760,Q4KLZ6,Q62975,Q9QX74                                           |
| 245 | 1,2,3,4,6,2<br>5,29,30 | 5,7,8,26,2<br>7,28,31,32 | 5  | O54800;Q5DWV2,Q4KLZ6,Q6IG02,Q9QWN8,Q9WTT6                                           |
| 246 | 1,2,3,4,6,2<br>5,29,31 | 5,7,8,26,2<br>7,28,30,32 | 3  | P29315,Q4KLZ6,Q9QWN8                                                                |
| 247 | 1,2,3,4,6,2<br>5,29,32 | 5,7,8,26,2<br>7,28,30,31 | 4  | O54800;Q5DWV2,O55145,Q4KLZ6,Q9WTT6                                                  |
| 248 | 1,2,3,4,6,2<br>5,30,31 | 5,7,8,26,2<br>7,28,29,32 | 11 | O54800;Q5DWV2,P06760,P29315,Q09030,Q4KLZ6,Q6P6R2,Q812E4,Q8CFN2,Q9QWN8,Q9QX74,Q9WTT6 |
| 249 | 1,2,3,4,6,2<br>5,30,32 | 5,7,8,26,2<br>7,28,29,31 | 9  | O54800;Q5DWV2,P06760,P26342,Q09030,Q4G075,Q4KLZ6,Q6P6R2,Q9QX74,Q9WTT6               |
| 250 | 1,2,3,4,6,2<br>5,31,32 | 5,7,8,26,2<br>7,28,29,30 | 11 | O54800;Q5DWV2,P06760,P26342,P29315,Q09030,Q4G075,Q4KLZ6,Q63532,Q6P6R2,Q9QX74,Q9WTT6 |
| 251 | 1,2,3,4,6,2<br>6,27,28 | 5,7,8,25,2<br>9,30,31,32 | 2  | P09656,P21588                                                                       |
| 252 | 1,2,3,4,6,2<br>6,27,29 | 5,7,8,25,2<br>8,30,31,32 | 3  | P02783,P09656,P21588                                                                |
| 253 | 1,2,3,4,6,2<br>6,27,30 | 5,7,8,25,2<br>8,29,31,32 | 6  | P02783,P06760,P09656,P21588,P97580,Q80WL1                                           |
| 254 | 1,2,3,4,6,2<br>6,27,31 | 5,7,8,25,2<br>8,29,30,32 | 2  | P02783,P06760                                                                       |
| 255 | 1,2,3,4,6,2<br>6,27,32 | 5,7,8,25,2<br>8,29,30,31 | 4  | O54800;Q5DWV2,P02783,P06760,P09656                                                  |
| 256 | 1,2,3,4,6,2<br>6,28,29 | 5,7,8,25,2<br>7,30,31,32 | 2  | P02783,P09656                                                                       |
| 257 | 1,2,3,4,6,2<br>6,28,30 | 5,7,8,25,2<br>7,29,31,32 | 3  | P06760,P21588,Q80WL1                                                                |
| 258 | 1,2,3,4,6,2<br>6,28,31 | 5,7,8,25,2<br>7,29,30,32 | 2  | P06760,Q63532                                                                       |
| 259 | 1,2,3,4,6,2<br>6,28,32 | 5,7,8,25,2<br>7,29,30,31 | 2  | O54800;Q5DWV2,P06760                                                                |
| 260 | 1,2,3,4,6,2<br>6,29,30 | 5,7,8,25,2<br>7,28,31,32 | 5  | O54800;Q5DWV2,P02783,P09656,P21588,Q80WL1                                           |
| 261 | 1,2,3,4,6,2<br>6,29,31 | 5,7,8,25,2<br>7,28,30,32 | 1  | P02783                                                                              |
| 262 | 1,2,3,4,6,2<br>6,29,32 | 5,7,8,25,2<br>7,28,30,31 | 4  | O54800;Q5DWV2,P02783,P06866,P09656                                                  |
| 263 | 1,2,3,4,6,2<br>6,30,31 | 5,7,8,25,2<br>7,28,29,32 | 6  | O54800;Q5DWV2,P02783,P06760,Q4G075,Q812E4,Q99MH3                                    |

|     |                        |                          |   |                                                                       |
|-----|------------------------|--------------------------|---|-----------------------------------------------------------------------|
| 264 | 1,2,3,4,6,2<br>6,30,32 | 5,7,8,25,2<br>7,28,29,31 | 9 | O54800;Q5DWV2,P02783,P06760,P26342,P97615,Q4G075,Q99MH3,Q9QX74,Q9WTT6 |
| 265 | 1,2,3,4,6,2<br>6,31,32 | 5,7,8,25,2<br>7,28,29,30 | 7 | O54800;Q5DWV2,P02783,P06760,Q4G075,Q63532,Q99MH3,Q9WTT6               |
| 266 | 1,2,3,4,6,2<br>7,28,29 | 5,7,8,25,2<br>6,30,31,32 | 3 | P02783,P09656,Q9WVK7                                                  |
| 267 | 1,2,3,4,6,2<br>7,28,30 | 5,7,8,25,2<br>6,29,31,32 | 6 | P06760,P09656,P11762,P19218,P21588,Q9QX74                             |
| 268 | 1,2,3,4,6,2<br>7,28,31 | 5,7,8,25,2<br>6,29,30,32 | 1 | P06760                                                                |
| 269 | 1,2,3,4,6,2<br>7,28,32 | 5,7,8,25,2<br>6,29,30,31 | 4 | P06760,P09656,Q62761;Q62762;Q62763,Q9QX74                             |
| 270 | 1,2,3,4,6,2<br>7,29,30 | 5,7,8,25,2<br>6,28,31,32 | 4 | P02783,P09656,P21588,Q6IG02                                           |
| 271 | 1,2,3,4,6,2<br>7,29,31 | 5,7,8,25,2<br>6,28,30,32 | 3 | P02783,P09656,P80299                                                  |
| 272 | 1,2,3,4,6,2<br>7,29,32 | 5,7,8,25,2<br>6,28,30,31 | 3 | P02783,P09656,P80299                                                  |
| 273 | 1,2,3,4,6,2<br>7,30,31 | 5,7,8,25,2<br>6,28,29,32 | 4 | P02783,P06760,Q9QX74,Q9WTT6                                           |
| 274 | 1,2,3,4,6,2<br>7,30,32 | 5,7,8,25,2<br>6,28,29,31 | 6 | P02783,P06760,P09656,Q6P6R2,Q9QX74,Q9WTT6                             |
| 275 | 1,2,3,4,6,2<br>7,31,32 | 5,7,8,25,2<br>6,28,29,30 | 6 | P02783,P06760,P22006,P80299,Q9QX74,Q9WTT6                             |
| 276 | 1,2,3,4,6,2<br>8,29,30 | 5,7,8,25,2<br>6,27,31,32 | 1 | P09656                                                                |
| 277 | 1,2,3,4,6,2<br>8,29,31 | 5,7,8,25,2<br>6,27,30,32 | 0 |                                                                       |
| 278 | 1,2,3,4,6,2<br>8,29,32 | 5,7,8,25,2<br>6,27,30,31 | 1 | P09656                                                                |
| 279 | 1,2,3,4,6,2<br>8,30,31 | 5,7,8,25,2<br>6,27,29,32 | 4 | P06760,Q63532,Q9QX74,Q9WTT6                                           |
| 280 | 1,2,3,4,6,2<br>8,30,32 | 5,7,8,25,2<br>6,27,29,31 | 4 | P06760,Q4G075,Q9QX74,Q9WTT6                                           |
| 281 | 1,2,3,4,6,2<br>8,31,32 | 5,7,8,25,2<br>6,27,29,30 | 7 | P06760,P22006,P80299,Q4G075,Q63532,Q9QX74,Q9WTT6                      |
| 282 | 1,2,3,4,6,2<br>9,30,31 | 5,7,8,25,2<br>6,27,28,32 | 5 | P02783,P07150,P26342,Q9QWN8,Q9WTT6                                    |
| 283 | 1,2,3,4,6,2<br>9,30,32 | 5,7,8,25,2<br>6,27,28,31 | 7 | O54800;Q5DWV2,O55145,P02783,P09656,P26342,Q9WTT6,Q9Z0V6               |

|     |                        |                               |    |                                                                                     |
|-----|------------------------|-------------------------------|----|-------------------------------------------------------------------------------------|
| 284 | 1,2,3,4,6,2<br>9,31,32 | 5,7,8,25,2<br>6,27,28,30      | 5  | O55145,P02783,P26342,P80299,Q9WTT6                                                  |
| 285 | 1,2,3,4,6,3<br>0,31,32 | 5,7,8,25,2<br>6,27,28,29      | 11 | O54800;Q5DWV2,P06760,P20646,P22006,P26342,P97615,Q4G075,Q63532,Q6P6R2,Q9QX74,Q9WTT6 |
| 286 | 1,2,3,4,7,8<br>,25,26  | 5,6,27,28,<br>29,30,31,3<br>2 | 3  | G3V686,P97580,Q30KJ2                                                                |
| 287 | 1,2,3,4,7,8<br>,25,27  | 5,6,26,28,<br>29,30,31,3<br>2 | 7  | O70417,P01681,P36860,P97580,Q30KJ2,Q4G075,Q66H69                                    |
| 288 | 1,2,3,4,7,8<br>,25,28  | 5,6,26,27,<br>29,30,31,3<br>2 | 4  | O70417,P06911,P36860,Q811M5                                                         |
| 289 | 1,2,3,4,7,8<br>,25,29  | 5,6,26,27,<br>28,30,31,3<br>2 | 1  | P22006                                                                              |
| 290 | 1,2,3,4,7,8<br>,25,30  | 5,6,26,27,<br>28,29,31,3<br>2 | 8  | G3V686,O70417,P97580,Q6IFU8,Q6IFW6,Q6IG02,Q6IMF3,Q6P6Q2                             |
| 291 | 1,2,3,4,7,8<br>,25,31  | 5,6,26,27,<br>28,29,30,3<br>2 | 5  | G3V686,P01681,P20766,P29315,Q811M5                                                  |
| 292 | 1,2,3,4,7,8<br>,25,32  | 5,6,26,27,<br>28,29,30,3<br>1 | 3  | G3V686,P01681,Q811M5                                                                |
| 293 | 1,2,3,4,7,8<br>,26,27  | 5,6,25,28,<br>29,30,31,3<br>2 | 6  | P15399,P20762,P97580,Q30KJ2,Q5BJY9,Q66H69                                           |
| 294 | 1,2,3,4,7,8<br>,26,28  | 5,6,25,27,<br>29,30,31,3<br>2 | 3  | P97580,Q30KJ2,Q5RLM2                                                                |
| 295 | 1,2,3,4,7,8<br>,26,29  | 5,6,25,27,<br>28,30,31,3<br>2 | 2  | P97580,Q64093                                                                       |
| 296 | 1,2,3,4,7,8<br>,26,30  | 5,6,25,27,<br>28,29,31,3<br>2 | 6  | O70417,P20762,P97580,P97615,Q30KJ2,Q6IFW6                                           |
| 297 | 1,2,3,4,7,8<br>,26,31  | 5,6,25,27,<br>28,29,30,3<br>2 | 2  | P20766,P97580                                                                       |



|     |                       |                               |    |                                                                                                   |
|-----|-----------------------|-------------------------------|----|---------------------------------------------------------------------------------------------------|
| 298 | 1,2,3,4,7,8<br>,26,32 | 5,6,25,27,<br>28,29,30,3<br>1 | 2  | P97580,P97615                                                                                     |
| 299 | 1,2,3,4,7,8<br>,27,28 | 5,6,25,26,<br>29,30,31,3<br>2 | 8  | A0JPJ7,P36860,P47967,P97580,Q10758,Q30KJ2,Q66H69,Q9WVK7                                           |
| 300 | 1,2,3,4,7,8<br>,27,29 | 5,6,25,26,<br>28,30,31,3<br>2 | 9  | P00731,P19223,P62804,P97580,Q00715,Q10758,Q30KJ2,Q4G075,Q66H69                                    |
| 301 | 1,2,3,4,7,8<br>,27,30 | 5,6,25,26,<br>28,29,31,3<br>2 | 14 | O70417,P00731,P19218,P97580,Q10758,Q30KJ2,Q66H69,Q6IFU7,Q6IFU8,Q6IFW6,Q6IG02,Q6IG05,Q6IMF3,Q6P6Q2 |
| 302 | 1,2,3,4,7,8<br>,27,31 | 5,6,25,26,<br>28,29,30,3<br>2 | 5  | P20766,P97580,Q10758,Q30KJ2,Q66H69                                                                |
| 303 | 1,2,3,4,7,8<br>,27,32 | 5,6,25,26,<br>28,29,30,3<br>1 | 3  | P97580,Q30KJ2,Q66H69                                                                              |
| 304 | 1,2,3,4,7,8<br>,28,29 | 5,6,25,26,<br>27,30,31,3<br>2 | 3  | P21674,P47967,P62804                                                                              |
| 305 | 1,2,3,4,7,8<br>,28,30 | 5,6,25,26,<br>27,29,31,3<br>2 | 1  | O70417                                                                                            |
| 306 | 1,2,3,4,7,8<br>,28,31 | 5,6,25,26,<br>27,29,30,3<br>2 | 3  | P20766,P82471,Q811M5                                                                              |
| 307 | 1,2,3,4,7,8<br>,28,32 | 5,6,25,26,<br>27,29,30,3<br>1 | 1  | Q811M5                                                                                            |
| 308 | 1,2,3,4,7,8<br>,29,30 | 5,6,25,26,<br>27,28,31,3<br>2 | 7  | P62804,Q6IFU7,Q6IFU8,Q6IFW6,Q6IG02,Q6IMF3,Q6P6Q2                                                  |
| 309 | 1,2,3,4,7,8<br>,29,31 | 5,6,25,26,<br>27,28,30,3<br>2 | 2  | P20766,P82471                                                                                     |
| 310 | 1,2,3,4,7,8<br>,29,32 | 5,6,25,26,<br>27,28,30,3<br>1 | 0  |                                                                                                   |

|     |                        |                               |                                             |
|-----|------------------------|-------------------------------|---------------------------------------------|
| 311 | 1,2,3,4,7,8<br>,30,31  | 5,6,25,26,<br>27,28,29,3<br>2 | 5 P20766,P97615,Q6IFU8,Q6IFW6,Q6IMF3        |
| 312 | 1,2,3,4,7,8<br>,30,32  | 5,6,25,26,<br>27,28,29,3<br>1 | 6 O70417,P05539,P26342,P35280,P97615,Q6IFW6 |
| 313 | 1,2,3,4,7,8<br>,31,32  | 5,6,25,26,<br>27,28,29,3<br>0 | 5 P01681,P20766,P82471,P97615,Q811M5        |
| 314 | 1,2,3,4,7,2<br>5,26,27 | 5,6,8,28,2<br>9,30,31,32      | 0                                           |
| 315 | 1,2,3,4,7,2<br>5,26,28 | 5,6,8,27,2<br>9,30,31,32      | 0                                           |
| 316 | 1,2,3,4,7,2<br>5,26,29 | 5,6,8,27,2<br>8,30,31,32      | 1 P22006                                    |
| 317 | 1,2,3,4,7,2<br>5,26,30 | 5,6,8,27,2<br>8,29,31,32      | 0                                           |
| 318 | 1,2,3,4,7,2<br>5,26,31 | 5,6,8,27,2<br>8,29,30,32      | 3 P18298,P20766,P29315                      |
| 319 | 1,2,3,4,7,2<br>5,26,32 | 5,6,8,27,2<br>8,29,30,31      | 0                                           |
| 320 | 1,2,3,4,7,2<br>5,27,28 | 5,6,8,26,2<br>9,30,31,32      | 1 P36860                                    |
| 321 | 1,2,3,4,7,2<br>5,27,29 | 5,6,8,26,2<br>8,30,31,32      | 2 P10758,P19223                             |
| 322 | 1,2,3,4,7,2<br>5,27,30 | 5,6,8,26,2<br>8,29,31,32      | 0                                           |
| 323 | 1,2,3,4,7,2<br>5,27,31 | 5,6,8,26,2<br>8,29,30,32      | 3 P20766,P29315,Q9QYP1                      |
| 324 | 1,2,3,4,7,2<br>5,27,32 | 5,6,8,26,2<br>8,29,30,31      | 1 P01681                                    |
| 325 | 1,2,3,4,7,2<br>5,28,29 | 5,6,8,26,2<br>7,30,31,32      | 0                                           |
| 326 | 1,2,3,4,7,2<br>5,28,30 | 5,6,8,26,2<br>7,29,31,32      | 1 Q62975                                    |
| 327 | 1,2,3,4,7,2<br>5,28,31 | 5,6,8,26,2<br>7,29,30,32      | 2 P29315,Q811M5                             |
| 328 | 1,2,3,4,7,2<br>5,28,32 | 5,6,8,26,2<br>7,29,30,31      | 2 Q62975,Q811M5                             |
| 329 | 1,2,3,4,7,2<br>5,29,30 | 5,6,8,26,2<br>7,28,31,32      | 2 Q6IG02,Q9QWN8                             |

|     |                        |                          |   |                                    |
|-----|------------------------|--------------------------|---|------------------------------------|
| 330 | 1,2,3,4,7,2<br>5,29,31 | 5,6,8,26,2<br>7,28,30,32 | 2 | P29315,Q9QWN8                      |
| 331 | 1,2,3,4,7,2<br>5,29,32 | 5,6,8,26,2<br>7,28,30,31 | 0 |                                    |
| 332 | 1,2,3,4,7,2<br>5,30,31 | 5,6,8,26,2<br>7,28,29,32 | 5 | P26342,P29315,Q8CFN2,Q9QWN8,Q9QYP1 |
| 333 | 1,2,3,4,7,2<br>5,30,32 | 5,6,8,26,2<br>7,28,29,31 | 4 | P26342,Q62975,Q6P6R2,Q9R168        |
| 334 | 1,2,3,4,7,2<br>5,31,32 | 5,6,8,26,2<br>7,28,29,30 | 5 | P01681,P26342,P29315,Q6P6R2,Q811M5 |
| 335 | 1,2,3,4,7,2<br>6,27,28 | 5,6,8,25,2<br>9,30,31,32 | 2 | P47967,P97840                      |
| 336 | 1,2,3,4,7,2<br>6,27,29 | 5,6,8,25,2<br>8,30,31,32 | 1 | P19223                             |
| 337 | 1,2,3,4,7,2<br>6,27,30 | 5,6,8,25,2<br>8,29,31,32 | 2 | P21588,Q80WL1                      |
| 338 | 1,2,3,4,7,2<br>6,27,31 | 5,6,8,25,2<br>8,29,30,32 | 1 | P20766                             |
| 339 | 1,2,3,4,7,2<br>6,27,32 | 5,6,8,25,2<br>8,29,30,31 | 0 |                                    |
| 340 | 1,2,3,4,7,2<br>6,28,29 | 5,6,8,25,2<br>7,30,31,32 | 3 | P47967,P97840,Q63424               |
| 341 | 1,2,3,4,7,2<br>6,28,30 | 5,6,8,25,2<br>7,29,31,32 | 1 | Q80WL1                             |
| 342 | 1,2,3,4,7,2<br>6,28,31 | 5,6,8,25,2<br>7,29,30,32 | 1 | Q5RLM2                             |
| 343 | 1,2,3,4,7,2<br>6,28,32 | 5,6,8,25,2<br>7,29,30,31 | 0 |                                    |
| 344 | 1,2,3,4,7,2<br>6,29,30 | 5,6,8,25,2<br>7,28,31,32 | 1 | Q80WL1                             |
| 345 | 1,2,3,4,7,2<br>6,29,31 | 5,6,8,25,2<br>7,28,30,32 | 1 | P20766                             |
| 346 | 1,2,3,4,7,2<br>6,29,32 | 5,6,8,25,2<br>7,28,30,31 | 0 |                                    |
| 347 | 1,2,3,4,7,2<br>6,30,31 | 5,6,8,25,2<br>7,28,29,32 | 3 | P20766,Q812E4,Q8CFN2               |
| 348 | 1,2,3,4,7,2<br>6,30,32 | 5,6,8,25,2<br>7,28,29,31 | 3 | P26342,P97615,Q9R168               |
| 349 | 1,2,3,4,7,2<br>6,31,32 | 5,6,8,25,2<br>7,28,29,30 | 1 | P20766                             |

|     |                        |                          |                                      |
|-----|------------------------|--------------------------|--------------------------------------|
| 350 | 1,2,3,4,7,2<br>7,28,29 | 5,6,8,25,2<br>6,30,31,32 | 4 P00507,P47967,P97840,Q9WVK7        |
| 351 | 1,2,3,4,7,2<br>7,28,30 | 5,6,8,25,2<br>6,29,31,32 | 0                                    |
| 352 | 1,2,3,4,7,2<br>7,28,31 | 5,6,8,25,2<br>6,29,30,32 | 1 P80299                             |
| 353 | 1,2,3,4,7,2<br>7,28,32 | 5,6,8,25,2<br>6,29,30,31 | 1 Q62761;Q62762;Q62763               |
| 354 | 1,2,3,4,7,2<br>7,29,30 | 5,6,8,25,2<br>6,28,31,32 | 2 P19223,Q6IG02                      |
| 355 | 1,2,3,4,7,2<br>7,29,31 | 5,6,8,25,2<br>6,28,30,32 | 2 P19223,P80299                      |
| 356 | 1,2,3,4,7,2<br>7,29,32 | 5,6,8,25,2<br>6,28,30,31 | 1 P80299                             |
| 357 | 1,2,3,4,7,2<br>7,30,31 | 5,6,8,25,2<br>6,28,29,32 | 3 P20766,P80299,Q9QYP1               |
| 358 | 1,2,3,4,7,2<br>7,30,32 | 5,6,8,25,2<br>6,28,29,31 | 0                                    |
| 359 | 1,2,3,4,7,2<br>7,31,32 | 5,6,8,25,2<br>6,28,29,30 | 2 P20766,P80299                      |
| 360 | 1,2,3,4,7,2<br>8,29,30 | 5,6,8,25,2<br>6,27,31,32 | 1 P97840                             |
| 361 | 1,2,3,4,7,2<br>8,29,31 | 5,6,8,25,2<br>6,27,30,32 | 1 P80299                             |
| 362 | 1,2,3,4,7,2<br>8,29,32 | 5,6,8,25,2<br>6,27,30,31 | 1 P54921                             |
| 363 | 1,2,3,4,7,2<br>8,30,31 | 5,6,8,25,2<br>6,27,29,32 | 0                                    |
| 364 | 1,2,3,4,7,2<br>8,30,32 | 5,6,8,25,2<br>6,27,29,31 | 2 P26342,Q9R168                      |
| 365 | 1,2,3,4,7,2<br>8,31,32 | 5,6,8,25,2<br>6,27,29,30 | 2 P80299,Q811M5                      |
| 366 | 1,2,3,4,7,2<br>9,30,31 | 5,6,8,25,2<br>6,27,28,32 | 3 P26342,P80299,Q9QWN8               |
| 367 | 1,2,3,4,7,2<br>9,30,32 | 5,6,8,25,2<br>6,27,28,31 | 2 P17046,P26342                      |
| 368 | 1,2,3,4,7,2<br>9,31,32 | 5,6,8,25,2<br>6,27,28,30 | 2 P26342,P80299                      |
| 369 | 1,2,3,4,7,3<br>0,31,32 | 5,6,8,25,2<br>6,27,28,29 | 5 P06760,P26342,P80299,P97615,Q6P6R2 |

|     |                        |                          |    |                                                                                     |
|-----|------------------------|--------------------------|----|-------------------------------------------------------------------------------------|
| 370 | 1,2,3,4,8,2<br>5,26,27 | 5,6,7,28,2<br>9,30,31,32 | 6  | G3V686,P15399,P36860,P97580,Q30KJ2,Q5BJY9                                           |
| 371 | 1,2,3,4,8,2<br>5,26,28 | 5,6,7,27,2<br>9,30,31,32 | 4  | G3V686,P36860,P97580,Q30KJ2                                                         |
| 372 | 1,2,3,4,8,2<br>5,26,29 | 5,6,7,27,2<br>8,30,31,32 | 3  | P22006,P97580,Q30KJ2                                                                |
| 373 | 1,2,3,4,8,2<br>5,26,30 | 5,6,7,27,2<br>8,29,31,32 | 5  | G3V686,O88797,P97580,Q30KJ2,Q6IFW6                                                  |
| 374 | 1,2,3,4,8,2<br>5,26,31 | 5,6,7,27,2<br>8,29,30,32 | 4  | G3V686,P29315,P97580,Q30KJ2                                                         |
| 375 | 1,2,3,4,8,2<br>5,26,32 | 5,6,7,27,2<br>8,29,30,31 | 5  | G3V686,P01681,P97580,Q06000,Q30KJ2                                                  |
| 376 | 1,2,3,4,8,2<br>5,27,28 | 5,6,7,26,2<br>9,30,31,32 | 4  | P36860,P97580,Q10758,Q30KJ2                                                         |
| 377 | 1,2,3,4,8,2<br>5,27,29 | 5,6,7,26,2<br>8,30,31,32 | 5  | P19223,P22006,P97580,Q10758,Q30KJ2                                                  |
| 378 | 1,2,3,4,8,2<br>5,27,30 | 5,6,7,26,2<br>8,29,31,32 | 12 | O70417,P97580,Q10758,Q30KJ2,Q4FZU2,Q6IFU7,Q6IFU8,Q6IFW6,Q6IG02,Q6IG05,Q6IMF3,Q6P6Q2 |
| 379 | 1,2,3,4,8,2<br>5,27,31 | 5,6,7,26,2<br>8,29,30,32 | 6  | P01681,P29315,P36376,P97580,Q30KJ2,Q9QYP1                                           |
| 380 | 1,2,3,4,8,2<br>5,27,32 | 5,6,7,26,2<br>8,29,30,31 | 4  | P00762,P01681,P97580,Q30KJ2                                                         |
| 381 | 1,2,3,4,8,2<br>5,28,29 | 5,6,7,26,2<br>7,30,31,32 | 1  | P36860                                                                              |
| 382 | 1,2,3,4,8,2<br>5,28,30 | 5,6,7,26,2<br>7,29,31,32 | 3  | O70417,Q6IFU7,Q6IFW6                                                                |
| 383 | 1,2,3,4,8,2<br>5,28,31 | 5,6,7,26,2<br>7,29,30,32 | 3  | P29315,P36376,Q811M5                                                                |
| 384 | 1,2,3,4,8,2<br>5,28,32 | 5,6,7,26,2<br>7,29,30,31 | 3  | P01681,P36860,Q811M5                                                                |
| 385 | 1,2,3,4,8,2<br>5,29,30 | 5,6,7,26,2<br>7,28,31,32 | 9  | O88797,P22006,P97580,Q6IFU7,Q6IFU8,Q6IFW6,Q6IG02,Q6IMF3,Q6P6Q2                      |
| 386 | 1,2,3,4,8,2<br>5,29,31 | 5,6,7,26,2<br>7,28,30,32 | 1  | P29315                                                                              |
| 387 | 1,2,3,4,8,2<br>5,29,32 | 5,6,7,26,2<br>7,28,30,31 | 1  | P01681                                                                              |
| 388 | 1,2,3,4,8,2<br>5,30,31 | 5,6,7,26,2<br>7,28,29,32 | 7  | P01681,P02625,P29315,P36376,Q6IFU8,Q6IFW6,Q6IG02                                    |
| 389 | 1,2,3,4,8,2<br>5,30,32 | 5,6,7,26,2<br>7,28,29,31 | 7  | O88797,P01681,P02625,P05539,P97615,Q6IFU7,Q6IFW6                                    |

|     |                        |                          |    |                                                                       |
|-----|------------------------|--------------------------|----|-----------------------------------------------------------------------|
| 390 | 1,2,3,4,8,2<br>5,31,32 | 5,6,7,26,2<br>7,28,29,30 | 4  | P01681,P21588,P29315,Q811M5                                           |
| 391 | 1,2,3,4,8,2<br>6,27,28 | 5,6,7,25,2<br>9,30,31,32 | 7  | P15399,P36860,P97580,Q10758,Q30KJ2,Q5BJY9,Q9WVK7                      |
| 392 | 1,2,3,4,8,2<br>6,27,29 | 5,6,7,25,2<br>8,30,31,32 | 5  | P15399,P97580,Q10758,Q30KJ2,Q5BJY9                                    |
| 393 | 1,2,3,4,8,2<br>6,27,30 | 5,6,7,25,2<br>8,29,31,32 | 9  | P15399,P97580,Q10758,Q30KJ2,Q5BJY9,Q6IFU7,Q6IFU8,Q6IFW6,Q6IG02        |
| 394 | 1,2,3,4,8,2<br>6,27,31 | 5,6,7,25,2<br>8,29,30,32 | 5  | P15399,P97580,Q10758,Q30KJ2,Q5BJY9                                    |
| 395 | 1,2,3,4,8,2<br>6,27,32 | 5,6,7,25,2<br>8,29,30,31 | 4  | P15399,P97580,Q30KJ2,Q5BJY9                                           |
| 396 | 1,2,3,4,8,2<br>6,28,29 | 5,6,7,25,2<br>7,30,31,32 | 1  | P97580                                                                |
| 397 | 1,2,3,4,8,2<br>6,28,30 | 5,6,7,25,2<br>7,29,31,32 | 2  | P97580,Q30KJ2                                                         |
| 398 | 1,2,3,4,8,2<br>6,28,31 | 5,6,7,25,2<br>7,29,30,32 | 1  | P36376                                                                |
| 399 | 1,2,3,4,8,2<br>6,28,32 | 5,6,7,25,2<br>7,29,30,31 | 1  | O54728                                                                |
| 400 | 1,2,3,4,8,2<br>6,29,30 | 5,6,7,25,2<br>7,28,31,32 | 6  | O88797,P97580,Q30KJ2,Q6IFU7,Q6IFW6,Q6IG02                             |
| 401 | 1,2,3,4,8,2<br>6,29,31 | 5,6,7,25,2<br>7,28,30,32 | 0  |                                                                       |
| 402 | 1,2,3,4,8,2<br>6,29,32 | 5,6,7,25,2<br>7,28,30,31 | 0  |                                                                       |
| 403 | 1,2,3,4,8,2<br>6,30,31 | 5,6,7,25,2<br>7,28,29,32 | 3  | P05539,P97580,Q30KJ2                                                  |
| 404 | 1,2,3,4,8,2<br>6,30,32 | 5,6,7,25,2<br>7,28,29,31 | 5  | O88797,P05539,P97580,P97615,Q30KJ2                                    |
| 405 | 1,2,3,4,8,2<br>6,31,32 | 5,6,7,25,2<br>7,28,29,30 | 2  | O54728,P05539                                                         |
| 406 | 1,2,3,4,8,2<br>7,28,29 | 5,6,7,25,2<br>6,30,31,32 | 5  | P25809,P97580,Q10758,Q30KJ2,Q9WVK7                                    |
| 407 | 1,2,3,4,8,2<br>7,28,30 | 5,6,7,25,2<br>6,29,31,32 | 10 | P15399,P19218,P97580,Q10758,Q30KJ2,Q6IFU7,Q6IFU8,Q6IFW6,Q6IG02,Q6P6Q2 |
| 408 | 1,2,3,4,8,2<br>7,28,31 | 5,6,7,25,2<br>6,29,30,32 | 4  | P36376,P97580,Q10758,Q30KJ2                                           |
| 409 | 1,2,3,4,8,2<br>7,28,32 | 5,6,7,25,2<br>6,29,30,31 | 5  | P15399,P97580,Q10758,Q30KJ2,Q6AYR9                                    |

|     |                         |                          |    |                                                                              |
|-----|-------------------------|--------------------------|----|------------------------------------------------------------------------------|
| 410 | 1,2,3,4,8,2<br>7,29,30  | 5,6,7,25,2<br>6,28,31,32 | 11 | P00731,P19223,P97580,Q10758,Q30KJ2,Q6IFU7,Q6IFU8,Q6IFW6,Q6IG02,Q6IMF3,Q6P6Q2 |
| 411 | 1,2,3,4,8,2<br>7,29,31  | 5,6,7,25,2<br>6,28,30,32 | 5  | P19223,P97580,Q10758,Q30KJ2,Q5PQL7                                           |
| 412 | 1,2,3,4,8,2<br>7,29,32  | 5,6,7,25,2<br>6,28,30,31 | 3  | P97580,Q10758,Q30KJ2                                                         |
| 413 | 1,2,3,4,8,2<br>7,30,31  | 5,6,7,25,2<br>6,28,29,32 | 10 | P97580,Q10758,Q30KJ2,Q6IFU7,Q6IFU8,Q6IFW6,Q6IG02,Q6IG05,Q6IMF3,Q6P6Q2        |
| 414 | 1,2,3,4,8,2<br>7,30,32  | 5,6,7,25,2<br>6,28,29,31 | 8  | P97580,Q10758,Q30KJ2,Q6IFU7,Q6IFU8,Q6IFW6,Q6IG02,Q6P6Q2                      |
| 415 | 1,2,3,4,8,2<br>7,31,32  | 5,6,7,25,2<br>6,28,29,30 | 3  | P01681,P97580,Q10758                                                         |
| 416 | 1,2,3,4,8,2<br>8,29,30  | 5,6,7,25,2<br>6,27,31,32 | 3  | Q6IFU7,Q6IFW6,Q6IG02                                                         |
| 417 | 1,2,3,4,8,2<br>8,29,31  | 5,6,7,25,2<br>6,27,30,32 | 1  | P36376                                                                       |
| 418 | 1,2,3,4,8,2<br>8,29,32  | 5,6,7,25,2<br>6,27,30,31 | 0  |                                                                              |
| 419 | 1,2,3,4,8,2<br>8,30,31  | 5,6,7,25,2<br>6,27,29,32 | 1  | P36376                                                                       |
| 420 | 1,2,3,4,8,2<br>8,30,32  | 5,6,7,25,2<br>6,27,29,31 | 0  |                                                                              |
| 421 | 1,2,3,4,8,2<br>8,31,32  | 5,6,7,25,2<br>6,27,29,30 | 2  | P36376,Q811M5                                                                |
| 422 | 1,2,3,4,8,2<br>9,30,31  | 5,6,7,25,2<br>6,27,28,32 | 7  | Q5RJR2,Q6IFU7,Q6IFU8,Q6IFW6,Q6IG02,Q6IMF3,Q6P6Q2                             |
| 423 | 1,2,3,4,8,2<br>9,30,32  | 5,6,7,25,2<br>6,27,28,31 | 6  | O88797,Q6IFU7,Q6IFW6,Q6IG02,Q6IMF3,Q6P6Q2                                    |
| 424 | 1,2,3,4,8,2<br>9,31,32  | 5,6,7,25,2<br>6,27,28,30 | 0  |                                                                              |
| 425 | 1,2,3,4,8,3<br>0,31,32  | 5,6,7,25,2<br>6,27,28,29 | 5  | P02625,P05539,P26342,P63081,P97615                                           |
| 426 | 1,2,3,4,25,<br>26,27,28 | 5,6,7,8,29,<br>30,31,32  | 1  | P36860                                                                       |
| 427 | 1,2,3,4,25,<br>26,27,29 | 5,6,7,8,28,<br>30,31,32  | 1  | P35745                                                                       |
| 428 | 1,2,3,4,25,<br>26,27,30 | 5,6,7,8,28,<br>29,31,32  | 0  |                                                                              |
| 429 | 1,2,3,4,25,<br>26,27,31 | 5,6,7,8,28,<br>29,30,32  | 2  | P29315,Q9QYP1                                                                |

|     |                                              |                                                    |
|-----|----------------------------------------------|----------------------------------------------------|
| 430 | 1,2,3,4,25, 5,6,7,8,28,<br>26,27,32 29,30,31 | 2 P35745,Q06000                                    |
| 431 | 1,2,3,4,25, 5,6,7,8,27,<br>26,28,29 30,31,32 | 0                                                  |
| 432 | 1,2,3,4,25, 5,6,7,8,27,<br>26,28,30 29,31,32 | 0                                                  |
| 433 | 1,2,3,4,25, 5,6,7,8,27,<br>26,28,31 29,30,32 | 1 P29315                                           |
| 434 | 1,2,3,4,25, 5,6,7,8,27,<br>26,28,32 29,30,31 | 2 Q06000,Q62975                                    |
| 435 | 1,2,3,4,25, 5,6,7,8,27,<br>26,29,30 28,31,32 | 1 Q9QZK9                                           |
| 436 | 1,2,3,4,25, 5,6,7,8,27,<br>26,29,31 28,30,32 | 2 P19218,P29315                                    |
| 437 | 1,2,3,4,25, 5,6,7,8,27,<br>26,29,32 28,30,31 | 1 P19218                                           |
| 438 | 1,2,3,4,25, 5,6,7,8,27,<br>26,30,31 28,29,32 | 7 P06760,P29315,Q63617,Q6AYR9,Q812E4,Q8CFN2,Q9QYP1 |
| 439 | 1,2,3,4,25, 5,6,7,8,27,<br>26,30,32 28,29,31 | 5 D3ZUC6,P06760,Q06000,Q4G075,Q9QX74               |
| 440 | 1,2,3,4,25, 5,6,7,8,27,<br>26,31,32 28,29,30 | 4 P06760,P19218,P29315,Q4G075                      |
| 441 | 1,2,3,4,25, 5,6,7,8,26,<br>27,28,29 30,31,32 | 0                                                  |
| 442 | 1,2,3,4,25, 5,6,7,8,26,<br>27,28,30 29,31,32 | 2 P06760,Q9QX74                                    |
| 443 | 1,2,3,4,25, 5,6,7,8,26,<br>27,28,31 29,30,32 | 2 P29315,Q9QYP1                                    |
| 444 | 1,2,3,4,25, 5,6,7,8,26,<br>27,28,32 29,30,31 | 3 P06760,Q62761;Q62762;Q62763,Q9QX74               |
| 445 | 1,2,3,4,25, 5,6,7,8,26,<br>27,29,30 28,31,32 | 2 Q6IFW6,Q6IG02                                    |
| 446 | 1,2,3,4,25, 5,6,7,8,26,<br>27,29,31 28,30,32 | 2 P29315,Q9QYP1                                    |
| 447 | 1,2,3,4,25, 5,6,7,8,26,<br>27,29,32 28,30,31 | 1 P35745                                           |
| 448 | 1,2,3,4,25, 5,6,7,8,26,<br>27,30,31 28,29,32 | 5 P06760,P29315,Q6IG02,Q9QX74,Q9QYP1               |
| 449 | 1,2,3,4,25, 5,6,7,8,26,<br>27,30,32 28,29,31 | 5 P00762,P06760,Q6P6R2,Q9QX74,Q9WTT6               |



|     |                                              |                                                                                               |
|-----|----------------------------------------------|-----------------------------------------------------------------------------------------------|
| 450 | 1,2,3,4,25, 5,6,7,8,26,<br>27,31,32 28,29,30 | 6 P01681,P06760,P29315,Q9QX74,Q9QYP1,Q9WTT6                                                   |
| 451 | 1,2,3,4,25, 5,6,7,8,26,<br>28,29,30 27,31,32 | 1 P50116                                                                                      |
| 452 | 1,2,3,4,25, 5,6,7,8,26,<br>28,29,31 27,30,32 | 1 P29315                                                                                      |
| 453 | 1,2,3,4,25, 5,6,7,8,26,<br>28,29,32 27,30,31 | 0                                                                                             |
| 454 | 1,2,3,4,25, 5,6,7,8,26,<br>28,30,31 27,29,32 | 3 P06760,P29315,Q9QX74                                                                        |
| 455 | 1,2,3,4,25, 5,6,7,8,26,<br>28,30,32 27,29,31 | 6 P06760,P50115,P50116,Q62975,Q9QX74,Q9WTT6                                                   |
| 456 | 1,2,3,4,25, 5,6,7,8,26,<br>28,31,32 27,29,30 | 5 P06760,P29315,Q811M5,Q9QX74,Q9WTT6                                                          |
| 457 | 1,2,3,4,25, 5,6,7,8,26,<br>29,30,31 27,28,32 | 6 P07150,P29315,P50116,Q6IG02,Q9QWN8,Q9WTT6                                                   |
| 458 | 1,2,3,4,25, 5,6,7,8,26,<br>29,30,32 27,28,31 | 4 P07150,P50115,P50116,Q9WTT6                                                                 |
| 459 | 1,2,3,4,25, 5,6,7,8,26,<br>29,31,32 27,28,30 | 4 P07150,P29315,P50116,Q9WTT6                                                                 |
| 460 | 1,2,3,4,25, 5,6,7,8,26,<br>30,31,32 27,28,29 | 13 D3ZUC6,P01681,P06760,P07150,P26342,P29315,P50115,P50116,Q4G075,Q6P6R2,Q9QX74,Q9QYP1,Q9WTT6 |
| 461 | 1,2,3,4,26, 5,6,7,8,25,<br>27,28,29 30,31,32 | 1 Q9WVK7                                                                                      |
| 462 | 1,2,3,4,26, 5,6,7,8,25,<br>27,28,30 29,31,32 | 1 P21588                                                                                      |
| 463 | 1,2,3,4,26, 5,6,7,8,25,<br>27,28,31 29,30,32 | 0                                                                                             |
| 464 | 1,2,3,4,26, 5,6,7,8,25,<br>27,28,32 29,30,31 | 0                                                                                             |
| 465 | 1,2,3,4,26, 5,6,7,8,25,<br>27,29,30 28,31,32 | 2 P21588,Q6IG02                                                                               |
| 466 | 1,2,3,4,26, 5,6,7,8,25,<br>27,29,31 28,30,32 | 0                                                                                             |
| 467 | 1,2,3,4,26, 5,6,7,8,25,<br>27,29,32 28,30,31 | 1 P35745                                                                                      |
| 468 | 1,2,3,4,26, 5,6,7,8,25,<br>27,30,31 28,29,32 | 2 P06760,Q9QYP1                                                                               |
| 469 | 1,2,3,4,26, 5,6,7,8,25,<br>27,30,32 28,29,31 | 1 P06760                                                                                      |

|     |                                              |                                                           |
|-----|----------------------------------------------|-----------------------------------------------------------|
| 470 | 1,2,3,4,26, 5,6,7,8,25,<br>27,31,32 28,29,30 | 1 P06760                                                  |
| 471 | 1,2,3,4,26, 5,6,7,8,25,<br>28,29,30 27,31,32 | 1 P50115                                                  |
| 472 | 1,2,3,4,26, 5,6,7,8,25,<br>28,29,31 27,30,32 | 0                                                         |
| 473 | 1,2,3,4,26, 5,6,7,8,25,<br>28,29,32 27,30,31 | 1 P50115                                                  |
| 474 | 1,2,3,4,26, 5,6,7,8,25,<br>28,30,31 27,29,32 | 3 P06760,P50115,Q4G075                                    |
| 475 | 1,2,3,4,26, 5,6,7,8,25,<br>28,30,32 27,29,31 | 3 P06760,P50115,Q4G075                                    |
| 476 | 1,2,3,4,26, 5,6,7,8,25,<br>28,31,32 27,29,30 | 4 O54728,P06760,P50115,Q4G075                             |
| 477 | 1,2,3,4,26, 5,6,7,8,25,<br>29,30,31 27,28,32 | 2 P50115,P50116                                           |
| 478 | 1,2,3,4,26, 5,6,7,8,25,<br>29,30,32 27,28,31 | 2 P50115,P50116                                           |
| 479 | 1,2,3,4,26, 5,6,7,8,25,<br>29,31,32 27,28,30 | 1 P50115                                                  |
| 480 | 1,2,3,4,26, 5,6,7,8,25,<br>30,31,32 27,28,29 | 8 P06760,P26342,P50115,P50116,P63081,Q4G075,Q812E4,Q9WTT6 |
| 481 | 1,2,3,4,27, 5,6,7,8,25,<br>28,29,30 26,31,32 | 2 Q6IG02,Q9WVK7                                           |
| 482 | 1,2,3,4,27, 5,6,7,8,25,<br>28,29,31 26,30,32 | 2 P80299,Q9WVK7                                           |
| 483 | 1,2,3,4,27, 5,6,7,8,25,<br>28,29,32 26,30,31 | 2 Q62761;Q62762;Q62763,Q9WVK7                             |
| 484 | 1,2,3,4,27, 5,6,7,8,25,<br>28,30,31 26,29,32 | 2 P06760,Q9QX74                                           |
| 485 | 1,2,3,4,27, 5,6,7,8,25,<br>28,30,32 26,29,31 | 2 P06760,Q9QX74                                           |
| 486 | 1,2,3,4,27, 5,6,7,8,25,<br>28,31,32 26,29,30 | 3 P06760,P80299,Q9QX74                                    |
| 487 | 1,2,3,4,27, 5,6,7,8,25,<br>29,30,31 26,28,32 | 2 P80299,Q6IG02                                           |
| 488 | 1,2,3,4,27, 5,6,7,8,25,<br>29,30,32 26,28,31 | 3 B0BNN3,Q6IG02,Q9WTT6                                    |
| 489 | 1,2,3,4,27, 5,6,7,8,25,<br>29,31,32 26,28,30 | 1 P80299                                                  |

|     |                                                  |    |                                                                                                   |
|-----|--------------------------------------------------|----|---------------------------------------------------------------------------------------------------|
| 490 | 1,2,3,4,27, 5,6,7,8,25,<br>30,31,32 26,28,29     | 6  | P06760,P80299,Q6P6R2,Q9QX74,Q9QYP1,Q9WTT6                                                         |
| 491 | 1,2,3,4,28, 5,6,7,8,25,<br>29,30,31 26,27,32     | 2  | P50115,P50116                                                                                     |
| 492 | 1,2,3,4,28, 5,6,7,8,25,<br>29,30,32 26,27,31     | 3  | P50115,P50116,Q9WTT6                                                                              |
| 493 | 1,2,3,4,28, 5,6,7,8,25,<br>29,31,32 26,27,30     | 3  | P50115,P50116,P80299                                                                              |
| 494 | 1,2,3,4,28, 5,6,7,8,25,<br>30,31,32 26,27,29     | 6  | P06760,P50115,P50116,Q4G075,Q9QX74,Q9WTT6                                                         |
| 495 | 1,2,3,4,29, 5,6,7,8,25,<br>30,31,32 26,27,28     | 8  | B0BNN3,P07150,P26342,P50115,P50116,P63081,P80299,Q9WTT6                                           |
| 496 | 1,2,3,5,6,7 4,26,27,28<br>,8,25 ,29,30,31,<br>32 | 7  | O54800;Q5DWV2,P02631,P36374,P50115,P52590,P80202,Q09030                                           |
| 497 | 1,2,3,5,6,7 4,25,27,28<br>,8,26 ,29,30,31,<br>32 | 11 | O54800;Q5DWV2,O70594,P00762,P36374,P50115,P52590,P97580,Q09030,Q5RLM2,Q62714,Q99MH3               |
| 498 | 1,2,3,5,6,7 4,25,26,28<br>,8,27 ,29,30,31,<br>32 | 14 | D3ZUC6,P00731,P19218,P47967,P50115,P50116,P52590,P97580,Q03191,Q09030,Q62714,Q66H69,Q9JJ50,Q9QZQ5 |
| 499 | 1,2,3,5,6,7 4,25,26,27<br>,8,28 ,29,30,31,<br>32 | 9  | D3ZUC6,P00762,P19218,P21674,P47967,P52590,Q09030,Q5RLM2,Q9QYP1                                    |
| 500 | 1,2,3,5,6,7 4,25,26,27<br>,8,29 ,28,30,31,<br>32 | 9  | O70594,P00762,P21674,P47967,P52590,P62804,Q09030,Q5RJR2,Q9QYP1                                    |
| 501 | 1,2,3,5,6,7 4,25,26,27<br>,8,30 ,28,29,31,<br>32 | 14 | P19218,P36374,P52590,P80202,Q09030,Q5I0J9,Q5RJR2,Q6IFU7,Q6IFW6,Q6IG05,Q6IMF3,Q6P6Q2,Q8CGS4,Q99MH3 |
| 502 | 1,2,3,5,6,7 4,25,26,27<br>,8,31 ,28,29,30,<br>32 | 9  | O70594,P20766,P36376,P52590,P80202,Q09030,Q5RJR2,Q62714,Q63532                                    |
| 503 | 1,2,3,5,6,7 4,25,26,27<br>,8,32 ,28,29,30,<br>31 | 7  | O54800;Q5DWV2,P52590,P80202,Q09030,Q62714,Q99MH3,Q9QZQ5                                           |
| 504 | 1,2,3,5,6,7 4,8,27,28,<br>,25,26 29,30,31,3<br>2 | 7  | O54800;Q5DWV2,P00762,P36374,P52590,Q09030,Q6AYR9,Q99MH3                                           |

|     |                       |                               |    |                                                                       |
|-----|-----------------------|-------------------------------|----|-----------------------------------------------------------------------|
| 505 | 1,2,3,5,6,7<br>,25,27 | 4,8,26,28,<br>29,30,31,3<br>2 | 6  | O54728,P50116,P52590,Q03191,Q09030,Q9JJ50                             |
| 506 | 1,2,3,5,6,7<br>,25,28 | 4,8,26,27,<br>29,30,31,3<br>2 | 3  | P00762,P52590,Q09030                                                  |
| 507 | 1,2,3,5,6,7<br>,25,29 | 4,8,26,27,<br>28,30,31,3<br>2 | 6  | O54728,O54800;Q5DWV2,P00762,P52590,Q09030,Q9QWN8                      |
| 508 | 1,2,3,5,6,7<br>,25,30 | 4,8,26,27,<br>28,29,31,3<br>2 | 9  | O54728,O54800;Q5DWV2,P36374,P52590,P97523,Q09030,Q6AYR9,Q6P6R2,Q9QWN8 |
| 509 | 1,2,3,5,6,7<br>,25,31 | 4,8,26,27,<br>28,29,30,3<br>2 | 8  | O54728,P20766,P52590,Q09030,Q62714,Q6AYR9,Q8CFN2,Q9QWN8               |
| 510 | 1,2,3,5,6,7<br>,25,32 | 4,8,26,27,<br>28,29,30,3<br>1 | 4  | O54800;Q5DWV2,P52590,Q09030,Q6P6R2                                    |
| 511 | 1,2,3,5,6,7<br>,26,27 | 4,8,25,28,<br>29,30,31,3<br>2 | 8  | P01039,P21588,P47967,P50116,P52590,Q03191,Q62714,Q9JJ50               |
| 512 | 1,2,3,5,6,7<br>,26,28 | 4,8,25,27,<br>29,30,31,3<br>2 | 5  | P00762,P47967,P52590,Q5RLM2,Q99MH3                                    |
| 513 | 1,2,3,5,6,7<br>,26,29 | 4,8,25,27,<br>28,30,31,3<br>2 | 6  | P00762,P01835,P36374,P47967,P52590,Q9JJ50                             |
| 514 | 1,2,3,5,6,7<br>,26,30 | 4,8,25,27,<br>28,29,31,3<br>2 | 8  | O54800;Q5DWV2,P00762,P21588,P36374,P52590,Q6AYR9,Q812E4,Q99MH3        |
| 515 | 1,2,3,5,6,7<br>,26,31 | 4,8,25,27,<br>28,29,30,3<br>2 | 10 | P00762,P20766,P52590,P57113,Q5RLM2,Q62714,Q6AYR9,Q812E4,Q99MH3,Q9Z2L0 |
| 516 | 1,2,3,5,6,7<br>,26,32 | 4,8,25,27,<br>28,29,30,3<br>1 | 4  | O54800;Q5DWV2,P52590,Q62714,Q99MH3                                    |
| 517 | 1,2,3,5,6,7<br>,27,28 | 4,8,25,26,<br>29,30,31,3<br>2 | 7  | P00762,P19218,P47967,P50116,P52590,Q03191,Q6AY61                      |

|     |                       |                               |    |                                                                                                                     |
|-----|-----------------------|-------------------------------|----|---------------------------------------------------------------------------------------------------------------------|
| 518 | 1,2,3,5,6,7<br>,27,29 | 4,8,25,26,<br>28,30,31,3<br>2 | 8  | O54728,P47967,P50116,P52590,Q03191,Q07523,Q6AY61,Q9JJ50                                                             |
| 519 | 1,2,3,5,6,7<br>,27,30 | 4,8,25,26,<br>28,29,31,3<br>2 | 11 | O54728,P00731,P01039,P19218,P21588,P50116,P52590,P84039,Q03191,Q5I0J9,Q9JJ50                                        |
| 520 | 1,2,3,5,6,7<br>,27,31 | 4,8,25,26,<br>28,29,30,3<br>2 | 7  | O54728,P01039,P20766,P50116,P52590,Q03191,Q62714                                                                    |
| 521 | 1,2,3,5,6,7<br>,27,32 | 4,8,25,26,<br>28,29,30,3<br>1 | 7  | P01039,P50116,P52590,Q03191,Q62714,Q6AY61,Q9JJ50                                                                    |
| 522 | 1,2,3,5,6,7<br>,28,29 | 4,8,25,26,<br>27,30,31,3<br>2 | 8  | P00762,P01835,P21674,P47967,P52590,P54921,Q6AY61,Q9QYP1                                                             |
| 523 | 1,2,3,5,6,7<br>,28,30 | 4,8,25,26,<br>27,29,31,3<br>2 | 5  | P00762,P19218,P47967,P52590,Q09030                                                                                  |
| 524 | 1,2,3,5,6,7<br>,28,31 | 4,8,25,26,<br>27,29,30,3<br>2 | 4  | P00762,P20766,P52590,Q09030                                                                                         |
| 525 | 1,2,3,5,6,7<br>,28,32 | 4,8,25,26,<br>27,29,30,3<br>1 | 3  | P47967,P52590,Q6AY61                                                                                                |
| 526 | 1,2,3,5,6,7<br>,29,30 | 4,8,25,26,<br>27,28,31,3<br>2 | 8  | O54728,P00762,P01835,P26342,P36374,P52590,Q9QWN8,Q9WUW8                                                             |
| 527 | 1,2,3,5,6,7<br>,29,31 | 4,8,25,26,<br>27,28,30,3<br>2 | 8  | O54728,O70594,P00762,P01835,P20766,P52590,Q62714,Q9QWN8                                                             |
| 528 | 1,2,3,5,6,7<br>,29,32 | 4,8,25,26,<br>27,28,30,3<br>1 | 4  | P01835,P26342,P52590,Q6AY61                                                                                         |
| 529 | 1,2,3,5,6,7<br>,30,31 | 4,8,25,26,<br>27,28,29,3<br>2 | 16 | O54728,P00762,P0C0A9,P20646,P20766,P26342,P30120,P36374,P52590,Q09030,Q62714,Q6AY<br>R9,Q6P6R2,Q812E4,Q8CFN2,Q9QWN8 |
| 530 | 1,2,3,5,6,7<br>,30,32 | 4,8,25,26,<br>27,28,29,3<br>1 | 10 | O54800,Q5DWV2,P01835,P20646,P26342,P36374,P52590,Q09030,Q5I0J9,Q6P6R2,Q99MH3                                        |

|     |                       |                               |    |                                                                                     |
|-----|-----------------------|-------------------------------|----|-------------------------------------------------------------------------------------|
| 531 | 1,2,3,5,6,7<br>,31,32 | 4,8,25,26,<br>27,28,29,3<br>0 | 7  | P20646,P20766,P26342,P52590,Q09030,Q62714,Q6P6R2                                    |
| 532 | 1,2,3,5,6,8<br>,25,26 | 4,7,27,28,<br>29,30,31,3<br>2 | 9  | O54800;Q5DWV2,P08649,P36374,P52590,P80299,P97580,Q06000,Q09030,Q99MH3               |
| 533 | 1,2,3,5,6,8<br>,25,27 | 4,7,26,28,<br>29,30,31,3<br>2 | 3  | P52590,P97580,Q09030                                                                |
| 534 | 1,2,3,5,6,8<br>,25,28 | 4,7,26,27,<br>29,30,31,3<br>2 | 3  | P36376,P52590,Q09030                                                                |
| 535 | 1,2,3,5,6,8<br>,25,29 | 4,7,26,27,<br>28,30,31,3<br>2 | 3  | P22006,P52590,Q09030                                                                |
| 536 | 1,2,3,5,6,8<br>,25,30 | 4,7,26,27,<br>28,29,31,3<br>2 | 11 | O54800;Q5DWV2,O88797,P20646,P36374,P52590,Q09030,Q6IFU7,Q6IFW6,Q6IG05,Q6IMF3,Q99MH3 |
| 537 | 1,2,3,5,6,8<br>,25,31 | 4,7,26,27,<br>28,29,30,3<br>2 | 4  | P36376,P52590,Q09030,Q63532                                                         |
| 538 | 1,2,3,5,6,8<br>,25,32 | 4,7,26,27,<br>28,29,30,3<br>1 | 7  | O54800;Q5DWV2,P01681,P20646,P52590,P80202,Q09030,Q99MH3                             |
| 539 | 1,2,3,5,6,8<br>,26,27 | 4,7,25,28,<br>29,30,31,3<br>2 | 6  | P15399,P52590,P97580,Q30KJ2,Q99MH3,Q9JJ50                                           |
| 540 | 1,2,3,5,6,8<br>,26,28 | 4,7,25,27,<br>29,30,31,3<br>2 | 3  | P52590,Q99MH3,Q9QYP1                                                                |
| 541 | 1,2,3,5,6,8<br>,26,29 | 4,7,25,27,<br>28,30,31,3<br>2 | 4  | P52590,P97580,Q99MH3,Q9QYP1                                                         |
| 542 | 1,2,3,5,6,8<br>,26,30 | 4,7,25,27,<br>28,29,31,3<br>2 | 11 | O88797,P36374,P52590,P97580,Q09030,Q5IOJ9,Q5RJR2,Q6IFU7,Q6IG05,Q8CGS4,Q99MH3        |
| 543 | 1,2,3,5,6,8<br>,26,31 | 4,7,25,27,<br>28,29,30,3<br>2 | 9  | P10247,P36376,P52590,Q09030,Q5RJR2,Q62714,Q63532,Q99MH3,Q9ZZL0                      |

|     |                       |                               |    |                                                                                                   |
|-----|-----------------------|-------------------------------|----|---------------------------------------------------------------------------------------------------|
| 544 | 1,2,3,5,6,8<br>,26,32 | 4,7,25,27,<br>28,29,30,3<br>1 | 4  | O54800;Q5DWV2,P52590,Q62714,Q99MH3                                                                |
| 545 | 1,2,3,5,6,8<br>,27,28 | 4,7,25,26,<br>29,30,31,3<br>2 | 4  | P19218,P36376,P52590,P97580                                                                       |
| 546 | 1,2,3,5,6,8<br>,27,29 | 4,7,25,26,<br>28,30,31,3<br>2 | 5  | P00731,P52590,P97580,Q5I0J9,Q9JJ50                                                                |
| 547 | 1,2,3,5,6,8<br>,27,30 | 4,7,25,26,<br>28,29,31,3<br>2 | 14 | P00731,P19218,P20646,P52590,P97580,Q09030,Q10758,Q30KJ2,Q5I0J9,Q6IFU7,Q6IFW6,Q6IG05,Q6IMF3,Q6P6Q2 |
| 548 | 1,2,3,5,6,8<br>,27,31 | 4,7,25,26,<br>28,29,30,3<br>2 | 8  | P00731,P36376,P52590,P97580,Q09030,Q62714,Q63532,Q9R168                                           |
| 549 | 1,2,3,5,6,8<br>,27,32 | 4,7,25,26,<br>28,29,30,3<br>1 | 6  | P20646,P52590,P97580,Q5I0J9,Q62714,Q9JJ50                                                         |
| 550 | 1,2,3,5,6,8<br>,28,29 | 4,7,25,26,<br>27,30,31,3<br>2 | 4  | P00762,P21674,P52590,Q9QYP1                                                                       |
| 551 | 1,2,3,5,6,8<br>,28,30 | 4,7,25,26,<br>27,29,31,3<br>2 | 7  | P19218,P52590,Q09030,Q5I0J9,Q6IFU7,Q6IG05,Q99MH3                                                  |
| 552 | 1,2,3,5,6,8<br>,28,31 | 4,7,25,26,<br>27,29,30,3<br>2 | 4  | P36376,P52590,Q09030,Q63532                                                                       |
| 553 | 1,2,3,5,6,8<br>,28,32 | 4,7,25,26,<br>27,29,30,3<br>1 | 4  | P52590,Q09030,Q5I0J9,Q99MH3                                                                       |
| 554 | 1,2,3,5,6,8<br>,29,30 | 4,7,25,26,<br>27,28,31,3<br>2 | 12 | O88797,P19218,P36374,P52590,Q09030,Q5I0J9,Q5RJR2,Q6IFU7,Q6IFW6,Q6IG05,Q6IMF3,Q6P6Q2               |
| 555 | 1,2,3,5,6,8<br>,29,31 | 4,7,25,26,<br>27,28,30,3<br>2 | 5  | P36376,P52590,Q09030,Q5RJR2,Q63532                                                                |
| 556 | 1,2,3,5,6,8<br>,29,32 | 4,7,25,26,<br>27,28,30,3<br>1 | 2  | P52590,Q5I0J9                                                                                     |

|     |                        |                               |    |                                                                                                                     |
|-----|------------------------|-------------------------------|----|---------------------------------------------------------------------------------------------------------------------|
| 557 | 1,2,3,5,6,8<br>,30,31  | 4,7,25,26,<br>27,28,29,3<br>2 | 16 | P0C0A9,P20646,P36374,P36376,P52590,Q09030,Q5I0J9,Q5RJR2,Q63532,Q6AYR8,Q6IFU7,Q6IG<br>05,Q6IMF3,Q8CGS4,Q99MH3,Q9Z2L0 |
| 558 | 1,2,3,5,6,8<br>,30,32  | 4,7,25,26,<br>27,28,29,3<br>1 | 14 | O88797,O89117,P19218,P20646,P36374,P52590,P97615,Q09030,Q5I0J9,Q6IFU7,Q6IG05,Q6IMF<br>3,Q6P6R2,Q99MH3               |
| 559 | 1,2,3,5,6,8<br>,31,32  | 4,7,25,26,<br>27,28,29,3<br>0 | 8  | O89117,P20646,P36376,P52590,Q09030,Q62714,Q63532,Q99MH3                                                             |
| 560 | 1,2,3,5,6,2<br>5,26,27 | 4,7,8,28,2<br>9,30,31,32      | 3  | P82471,Q06000,Q9JJ50                                                                                                |
| 561 | 1,2,3,5,6,2<br>5,26,28 | 4,7,8,27,2<br>9,30,31,32      | 4  | P00714,P82471,Q06000,Q99MH3                                                                                         |
| 562 | 1,2,3,5,6,2<br>5,26,29 | 4,7,8,27,2<br>8,30,31,32      | 3  | O54800;Q5DWV2,P52590,P82471                                                                                         |
| 563 | 1,2,3,5,6,2<br>5,26,30 | 4,7,8,27,2<br>8,29,31,32      | 14 | O54800;Q5DWV2,P08723,P22282,P36374,P47727,P82471,P97523,Q06000,Q09030,Q4G075,Q6<br>AYR9,Q812E4,Q99MH3,Q9Z2L0        |
| 564 | 1,2,3,5,6,2<br>5,26,31 | 4,7,8,27,2<br>8,29,30,32      | 13 | O54800;Q5DWV2,P00714,P02780,P08723,P18298,P22282,Q09030,Q4G075,Q63150,Q6AYR9,Q<br>812E4,Q99MH3,Q9Z2L0               |
| 565 | 1,2,3,5,6,2<br>5,26,32 | 4,7,8,27,2<br>8,29,30,31      | 5  | O54800;Q5DWV2,P82471,Q06000,Q4G075,Q99MH3                                                                           |
| 566 | 1,2,3,5,6,2<br>5,27,28 | 4,7,8,26,2<br>9,30,31,32      | 1  | P82471                                                                                                              |
| 567 | 1,2,3,5,6,2<br>5,27,29 | 4,7,8,26,2<br>8,30,31,32      | 4  | O54728,P52590,P82471,Q9JJ50                                                                                         |
| 568 | 1,2,3,5,6,2<br>5,27,30 | 4,7,8,26,2<br>8,29,31,32      | 7  | O54728,P30120,P82471,Q09030,Q5I0J9,Q6P6R2,Q9QX74                                                                    |
| 569 | 1,2,3,5,6,2<br>5,27,31 | 4,7,8,26,2<br>8,29,30,32      | 3  | O54728,Q03191,Q09030                                                                                                |
| 570 | 1,2,3,5,6,2<br>5,27,32 | 4,7,8,26,2<br>8,29,30,31      | 6  | O70257,P20646,P82471,Q03191,Q6P6R2,Q9QX74                                                                           |
| 571 | 1,2,3,5,6,2<br>5,28,29 | 4,7,8,26,2<br>7,30,31,32      | 2  | P52590,P82471                                                                                                       |
| 572 | 1,2,3,5,6,2<br>5,28,30 | 4,7,8,26,2<br>7,29,31,32      | 6  | P52590,P82471,Q09030,Q4G075,Q62975,Q9QX74                                                                           |
| 573 | 1,2,3,5,6,2<br>5,28,31 | 4,7,8,26,2<br>7,29,30,32      | 3  | P00714,Q09030,Q4G075                                                                                                |
| 574 | 1,2,3,5,6,2<br>5,28,32 | 4,7,8,26,2<br>7,29,30,31      | 6  | P52590,P82471,Q09030,Q4G075,Q62975,Q9QX74                                                                           |
| 575 | 1,2,3,5,6,2<br>5,29,30 | 4,7,8,26,2<br>7,28,31,32      | 9  | O54728,P07150,P22282,P36374,P52590,P82471,P97523,Q09030,Q9QWN8                                                      |



|     |                        |                          |    |                                                                                                                                             |
|-----|------------------------|--------------------------|----|---------------------------------------------------------------------------------------------------------------------------------------------|
| 576 | 1,2,3,5,6,2<br>5,29,31 | 4,7,8,26,2<br>7,28,30,32 | 7  | O54728,P07150,P22282,P52590,Q09030,Q6AYR9,Q9QWN8                                                                                            |
| 577 | 1,2,3,5,6,2<br>5,29,32 | 4,7,8,26,2<br>7,28,30,31 | 5  | O54800;Q5DWV2,P07150,P52590,P82471,Q9WTT6                                                                                                   |
| 578 | 1,2,3,5,6,2<br>5,30,31 | 4,7,8,26,2<br>7,28,29,32 | 20 | O54728,P07150,P08723,P20646,P22273,P22282,P30120,P36374,P47727,P97584,Q09030,Q4G075,Q6AYR9,Q6P6R2,Q812E4,Q8CFN2,Q9QWN8,Q9QX74,Q9WTT6,Q9Z2L0 |
| 579 | 1,2,3,5,6,2<br>5,30,32 | 4,7,8,26,2<br>7,28,29,31 | 15 | O54800;Q5DWV2,P07150,P20646,P22273,P26342,P36374,P82471,P97523,Q09030,Q4G075,Q5I0J9,Q6P6R2,Q99MH3,Q9QX74,Q9WTT6                             |
| 580 | 1,2,3,5,6,2<br>5,31,32 | 4,7,8,26,2<br>7,28,29,30 | 10 | O54800;Q5DWV2,P07150,P20646,P22273,P97584,Q09030,Q4G075,Q6P6R2,Q9QX74,Q9WTT6                                                                |
| 581 | 1,2,3,5,6,2<br>6,27,28 | 4,7,8,25,2<br>9,30,31,32 | 4  | P21588,P52590,P82471,Q9JJ50                                                                                                                 |
| 582 | 1,2,3,5,6,2<br>6,27,29 | 4,7,8,25,2<br>8,30,31,32 | 4  | P21588,P52590,P82471,Q9JJ50                                                                                                                 |
| 583 | 1,2,3,5,6,2<br>6,27,30 | 4,7,8,25,2<br>8,29,31,32 | 7  | P01039,P21588,P30120,P82471,Q5I0J9,Q99MH3,Q9JJ50                                                                                            |
| 584 | 1,2,3,5,6,2<br>6,27,31 | 4,7,8,25,2<br>8,29,30,32 | 4  | P01039,Q62714,Q99MH3,Q9Z2L0                                                                                                                 |
| 585 | 1,2,3,5,6,2<br>6,27,32 | 4,7,8,25,2<br>8,29,30,31 | 6  | P01039,P52590,P82471,Q5I0J9,Q99MH3,Q9JJ50                                                                                                   |
| 586 | 1,2,3,5,6,2<br>6,28,29 | 4,7,8,25,2<br>7,30,31,32 | 5  | P00762,P47967,P52590,P82471,Q9QYP1                                                                                                          |
| 587 | 1,2,3,5,6,2<br>6,28,30 | 4,7,8,25,2<br>7,29,31,32 | 8  | P00714,P00762,P21588,P52590,P82471,Q4G075,Q5I0J9,Q99MH3                                                                                     |
| 588 | 1,2,3,5,6,2<br>6,28,31 | 4,7,8,25,2<br>7,29,30,32 | 5  | P00714,P00762,P52590,Q4G075,Q99MH3                                                                                                          |
| 589 | 1,2,3,5,6,2<br>6,28,32 | 4,7,8,25,2<br>7,29,30,31 | 4  | P52590,P82471,Q4G075,Q99MH3                                                                                                                 |
| 590 | 1,2,3,5,6,2<br>6,29,30 | 4,7,8,25,2<br>7,28,31,32 | 8  | P0C0A9,P21588,P22282,P36374,P52590,P82471,Q5I0J9,Q99MH3                                                                                     |
| 591 | 1,2,3,5,6,2<br>6,29,31 | 4,7,8,25,2<br>7,28,30,32 | 5  | P0C0A9,P22282,P52590,Q6AYR9,Q99MH3                                                                                                          |
| 592 | 1,2,3,5,6,2<br>6,29,32 | 4,7,8,25,2<br>7,28,30,31 | 3  | P52590,P82471,Q99MH3                                                                                                                        |
| 593 | 1,2,3,5,6,2<br>6,30,31 | 4,7,8,25,2<br>7,28,29,32 | 12 | P08723,P0C0A9,P20646,P22282,P30120,P36374,P47727,Q4G075,Q6AYR9,Q812E4,Q99MH3,Q9Z2L0                                                         |
| 594 | 1,2,3,5,6,2<br>6,30,32 | 4,7,8,25,2<br>7,28,29,31 | 11 | O54800;Q5DWV2,P0C0A9,P20646,P36374,P52590,P82471,Q4G075,Q5I0J9,Q812E4,Q99MH3,Q9WTT6                                                         |
| 595 | 1,2,3,5,6,2<br>6,31,32 | 4,7,8,25,2<br>7,28,29,30 | 8  | P0C0A9,P20646,P52590,Q4G075,Q62714,Q812E4,Q99MH3,Q9Z2L0                                                                                     |

|     |                        |                          |    |                                                                                                                                             |
|-----|------------------------|--------------------------|----|---------------------------------------------------------------------------------------------------------------------------------------------|
| 596 | 1,2,3,5,6,2<br>7,28,29 | 4,7,8,25,2<br>6,30,31,32 | 4  | P47967,P52590,P82471,Q6AY61                                                                                                                 |
| 597 | 1,2,3,5,6,2<br>7,28,30 | 4,7,8,25,2<br>6,29,31,32 | 6  | P19218,P21588,P52590,P82471,Q5I0J9,Q9QX74                                                                                                   |
| 598 | 1,2,3,5,6,2<br>7,28,31 | 4,7,8,25,2<br>6,29,30,32 | 1  | P52590                                                                                                                                      |
| 599 | 1,2,3,5,6,2<br>7,28,32 | 4,7,8,25,2<br>6,29,30,31 | 6  | P52590,P82471,Q5I0J9,Q62761;Q62762;Q62763,Q6AY61,Q9QX74                                                                                     |
| 600 | 1,2,3,5,6,2<br>7,29,30 | 4,7,8,25,2<br>6,28,31,32 | 7  | O54728,P00731,P19218,P52590,P82471,Q5I0J9,Q9JJ50                                                                                            |
| 601 | 1,2,3,5,6,2<br>7,29,31 | 4,7,8,25,2<br>6,28,30,32 | 2  | O54728,P52590                                                                                                                               |
| 602 | 1,2,3,5,6,2<br>7,29,32 | 4,7,8,25,2<br>6,28,30,31 | 5  | P52590,P82471,Q5I0J9,Q6AY61,Q9JJ50                                                                                                          |
| 603 | 1,2,3,5,6,2<br>7,30,31 | 4,7,8,25,2<br>6,28,29,32 | 8  | O54728,P01039,P20646,P30120,Q5I0J9,Q6P6R2,Q9QX74,Q9WTT6                                                                                     |
| 604 | 1,2,3,5,6,2<br>7,30,32 | 4,7,8,25,2<br>6,28,29,31 | 9  | P01039,P20646,P52590,P82471,Q03191,Q5I0J9,Q6P6R2,Q9QX74,Q9WTT6                                                                              |
| 605 | 1,2,3,5,6,2<br>7,31,32 | 4,7,8,25,2<br>6,28,29,30 | 9  | P01039,P20646,P52590,Q03191,Q5I0J9,Q62714,Q6P6R2,Q9QX74,Q9WTT6                                                                              |
| 606 | 1,2,3,5,6,2<br>8,29,30 | 4,7,8,25,2<br>6,27,31,32 | 4  | P00762,P52590,P82471,Q5I0J9                                                                                                                 |
| 607 | 1,2,3,5,6,2<br>8,29,31 | 4,7,8,25,2<br>6,27,30,32 | 2  | P00762,P52590                                                                                                                               |
| 608 | 1,2,3,5,6,2<br>8,29,32 | 4,7,8,25,2<br>6,27,30,31 | 4  | P52590,P82471,Q5I0J9,Q6AY61                                                                                                                 |
| 609 | 1,2,3,5,6,2<br>8,30,31 | 4,7,8,25,2<br>6,27,29,32 | 7  | P00762,P52590,Q09030,Q4G075,Q5I0J9,Q9QX74,Q9WTT6                                                                                            |
| 610 | 1,2,3,5,6,2<br>8,30,32 | 4,7,8,25,2<br>6,27,29,31 | 9  | P20646,P52590,P82471,Q4G075,Q5I0J9,Q99MH3,Q9QX74,Q9WTT6,Q9Z0V6                                                                              |
| 611 | 1,2,3,5,6,2<br>8,31,32 | 4,7,8,25,2<br>6,27,29,30 | 5  | P52590,Q09030,Q4G075,Q9QX74,Q9WTT6                                                                                                          |
| 612 | 1,2,3,5,6,2<br>9,30,31 | 4,7,8,25,2<br>6,27,28,32 | 13 | O54728,P07150,P0C0A9,P20646,P22282,P26342,P36860,P52590,Q5I0J9,Q5RJR2,Q6AYR9,Q9QWN8,Q9WTT6                                                  |
| 613 | 1,2,3,5,6,2<br>9,30,32 | 4,7,8,25,2<br>6,27,28,31 | 10 | P01835,P07150,P20646,P26342,P52590,P82471,Q4G075,Q5I0J9,Q9WTT6,Q9Z0V6                                                                       |
| 614 | 1,2,3,5,6,2<br>9,31,32 | 4,7,8,25,2<br>6,27,28,30 | 6  | P07150,P20646,P26342,P52590,Q4G075,Q9WTT6                                                                                                   |
| 615 | 1,2,3,5,6,3<br>0,31,32 | 4,7,8,25,2<br>6,27,28,29 | 20 | P06760,P07150,P0C0A9,P20646,P22273,P22282,P26342,P36860,P47727,P52590,P97584,Q09030,Q4G075,Q5I0J9,Q6P6R2,Q812E4,Q99MH3,Q9QX74,Q9WTT6,Q9Z2L0 |

|     |                       |                               |                                                                          |
|-----|-----------------------|-------------------------------|--------------------------------------------------------------------------|
| 616 | 1,2,3,5,7,8<br>,25,26 | 4,6,27,28,<br>29,30,31,3<br>2 | 2 P22006,P36374                                                          |
| 617 | 1,2,3,5,7,8<br>,25,27 | 4,6,26,28,<br>29,30,31,3<br>2 | 4 P00731,P22006,Q03191,Q66H69                                            |
| 618 | 1,2,3,5,7,8<br>,25,28 | 4,6,26,27,<br>29,30,31,3<br>2 | 3 P22006,P36860,Q811M5                                                   |
| 619 | 1,2,3,5,7,8<br>,25,29 | 4,6,26,27,<br>28,30,31,3<br>2 | 2 P22006,Q8VD89                                                          |
| 620 | 1,2,3,5,7,8<br>,25,30 | 4,6,26,27,<br>28,29,31,3<br>2 | 10 P22006,P36374,Q05511,Q4FZU2,Q6IFU7,Q6IFU8,Q6IFW6,Q6IG05,Q6IMF3,Q6P6Q2 |
| 621 | 1,2,3,5,7,8<br>,25,31 | 4,6,26,27,<br>28,29,30,3<br>2 | 3 P20766,P36376,Q811M5                                                   |
| 622 | 1,2,3,5,7,8<br>,25,32 | 4,6,26,27,<br>28,29,30,3<br>1 | 2 P01681,Q811M5                                                          |
| 623 | 1,2,3,5,7,8<br>,26,27 | 4,6,25,28,<br>29,30,31,3<br>2 | 6 P00731,P22006,P47967,Q5RLM2,Q66H69,Q9JJ50                              |
| 624 | 1,2,3,5,7,8<br>,26,28 | 4,6,25,27,<br>29,30,31,3<br>2 | 3 D3ZUC6,P47967,Q5RLM2                                                   |
| 625 | 1,2,3,5,7,8<br>,26,29 | 4,6,25,27,<br>28,30,31,3<br>2 | 6 O70594,P06760,P22006,P47967,Q9QX74,Q9WUW8                              |
| 626 | 1,2,3,5,7,8<br>,26,30 | 4,6,25,27,<br>28,29,31,3<br>2 | 6 P36374,Q6IFU7,Q6IG05,Q6IMF3,Q99MH3,Q9WUW8                              |
| 627 | 1,2,3,5,7,8<br>,26,31 | 4,6,25,27,<br>28,29,30,3<br>2 | 3 P20766,Q5RLM2,Q62714                                                   |
| 628 | 1,2,3,5,7,8<br>,26,32 | 4,6,25,27,<br>28,29,30,3<br>1 | 2 Q62714,Q99MH3                                                          |

|     |                       |                               |                                                                                        |
|-----|-----------------------|-------------------------------|----------------------------------------------------------------------------------------|
| 629 | 1,2,3,5,7,8<br>,27,28 | 4,6,25,26,<br>29,30,31,3<br>2 | 7 D3ZUC6,P00731,P19218,P47967,Q5I0D1,Q5RLM2,Q66H69                                     |
| 630 | 1,2,3,5,7,8<br>,27,29 | 4,6,25,26,<br>28,30,31,3<br>2 | 11 P00731,P06760,P22006,P25809,P47967,P62804,Q00715,Q4G075,Q5I0D1,Q66H69,Q9JJ50        |
| 631 | 1,2,3,5,7,8<br>,27,30 | 4,6,25,26,<br>28,29,31,3<br>2 | 9 P00731,P19218,Q66H69,Q6IFU7,Q6IFU8,Q6IFW6,Q6IG05,Q6IMF3,Q6P6Q2                       |
| 632 | 1,2,3,5,7,8<br>,27,31 | 4,6,25,26,<br>28,29,30,3<br>2 | 5 P00731,P20766,P36376,Q62714,Q66H69                                                   |
| 633 | 1,2,3,5,7,8<br>,27,32 | 4,6,25,26,<br>28,29,30,3<br>1 | 3 Q03191,Q62714,Q66H69                                                                 |
| 634 | 1,2,3,5,7,8<br>,28,29 | 4,6,25,26,<br>27,30,31,3<br>2 | 9 D3ZUC6,P21674,P22006,P47967,P54921,P62804,Q00715,Q9QYP1,Q9WUW8                       |
| 635 | 1,2,3,5,7,8<br>,28,30 | 4,6,25,26,<br>27,29,31,3<br>2 | 6 P19218,P47967,Q6IFU7,Q6IG05,Q6IMF3,Q9WUW8                                            |
| 636 | 1,2,3,5,7,8<br>,28,31 | 4,6,25,26,<br>27,29,30,3<br>2 | 5 D3ZUC6,P20766,P36376,Q5RLM2,Q811M5                                                   |
| 637 | 1,2,3,5,7,8<br>,28,32 | 4,6,25,26,<br>27,29,30,3<br>1 | 2 P47967,Q811M5                                                                        |
| 638 | 1,2,3,5,7,8<br>,29,30 | 4,6,25,26,<br>27,28,31,3<br>2 | 12 P22006,P36374,P47967,P62804,Q6IFU7,Q6IFU8,Q6IFW6,Q6IG02,Q6IG05,Q6IMF3,Q6P6Q2,Q9WUW8 |
| 639 | 1,2,3,5,7,8<br>,29,31 | 4,6,25,26,<br>27,28,30,3<br>2 | 2 O70594,P20766                                                                        |
| 640 | 1,2,3,5,7,8<br>,29,32 | 4,6,25,26,<br>27,28,30,3<br>1 | 1 Q9WUW8                                                                               |
| 641 | 1,2,3,5,7,8<br>,30,31 | 4,6,25,26,<br>27,28,29,3<br>2 | 8 P20766,Q5RJR2,Q6AYR8,Q6IFU7,Q6IFW6,Q6IG05,Q6IMF3,Q6P6Q2                              |

|     |                        |                               |   |                                                         |
|-----|------------------------|-------------------------------|---|---------------------------------------------------------|
| 642 | 1,2,3,5,7,8<br>,30,32  | 4,6,25,26,<br>27,28,29,3<br>1 | 8 | P26342,P35280,P97615,Q6IFU7,Q6IG05,Q6IMF3,Q6P6Q2,Q9WUW8 |
| 643 | 1,2,3,5,7,8<br>,31,32  | 4,6,25,26,<br>27,28,29,3<br>0 | 3 | P20766,Q62714,Q811M5                                    |
| 644 | 1,2,3,5,7,2<br>5,26,27 | 4,6,8,28,2<br>9,30,31,32      | 3 | P22006,Q03191,Q9JJ50                                    |
| 645 | 1,2,3,5,7,2<br>5,26,28 | 4,6,8,27,2<br>9,30,31,32      | 1 | P00714                                                  |
| 646 | 1,2,3,5,7,2<br>5,26,29 | 4,6,8,27,2<br>8,30,31,32      | 2 | P22006,Q8VD89                                           |
| 647 | 1,2,3,5,7,2<br>5,26,30 | 4,6,8,27,2<br>8,29,31,32      | 6 | P00714,P22006,P22282,P36374,Q6AYR9,Q812E4               |
| 648 | 1,2,3,5,7,2<br>5,26,31 | 4,6,8,27,2<br>8,29,30,32      | 7 | P00714,P18298,P20766,P22282,Q6AYR9,Q812E4,Q8CFN2        |
| 649 | 1,2,3,5,7,2<br>5,26,32 | 4,6,8,27,2<br>8,29,30,31      | 0 |                                                         |
| 650 | 1,2,3,5,7,2<br>5,27,28 | 4,6,8,26,2<br>9,30,31,32      | 2 | Q03191,Q6AY61                                           |
| 651 | 1,2,3,5,7,2<br>5,27,29 | 4,6,8,26,2<br>8,30,31,32      | 5 | O54728,P22006,Q03191,Q6AY61,Q8VD89                      |
| 652 | 1,2,3,5,7,2<br>5,27,30 | 4,6,8,26,2<br>8,29,31,32      | 4 | O54728,P22006,Q03191,Q05511                             |
| 653 | 1,2,3,5,7,2<br>5,27,31 | 4,6,8,26,2<br>8,29,30,32      | 3 | O54728,P20766,Q03191                                    |
| 654 | 1,2,3,5,7,2<br>5,27,32 | 4,6,8,26,2<br>8,29,30,31      | 3 | O70257,Q03191,Q6AY61                                    |
| 655 | 1,2,3,5,7,2<br>5,28,29 | 4,6,8,26,2<br>7,30,31,32      | 4 | P22006,P47967,P54921,Q6AY61                             |
| 656 | 1,2,3,5,7,2<br>5,28,30 | 4,6,8,26,2<br>7,29,31,32      | 2 | P00714,Q62975                                           |
| 657 | 1,2,3,5,7,2<br>5,28,31 | 4,6,8,26,2<br>7,29,30,32      | 2 | P00714,Q811M5                                           |
| 658 | 1,2,3,5,7,2<br>5,28,32 | 4,6,8,26,2<br>7,29,30,31      | 3 | Q62975,Q6AY61,Q811M5                                    |
| 659 | 1,2,3,5,7,2<br>5,29,30 | 4,6,8,26,2<br>7,28,31,32      | 5 | O54728,P22006,P22282,P36374,Q9QWN8                      |
| 660 | 1,2,3,5,7,2<br>5,29,31 | 4,6,8,26,2<br>7,28,30,32      | 5 | O54728,P22282,Q6AYR9,Q8VD89,Q9QWN8                      |

|     |                                              |                                                                  |
|-----|----------------------------------------------|------------------------------------------------------------------|
| 661 | 1,2,3,5,7,2 4,6,8,26,2<br>5,29,32 7,28,30,31 | 1 Q6AY61                                                         |
| 662 | 1,2,3,5,7,2 4,6,8,26,2<br>5,30,31 7,28,29,32 | 7 O54728,P22282,Q6AYR9,Q6P6R2,Q812E4,Q8CFN2,Q9QWN8               |
| 663 | 1,2,3,5,7,2 4,6,8,26,2<br>5,30,32 7,28,29,31 | 5 P26342,P97523,Q62975,Q6P6R2,Q9R168                             |
| 664 | 1,2,3,5,7,2 4,6,8,26,2<br>5,31,32 7,28,29,30 | 3 P20766,Q6P6R2,Q811M5                                           |
| 665 | 1,2,3,5,7,2 4,6,8,25,2<br>6,27,28 9,30,31,32 | 3 P47967,P97840,Q5RLM2                                           |
| 666 | 1,2,3,5,7,2 4,6,8,25,2<br>6,27,29 8,30,31,32 | 3 P22006,P47967,Q9JJ50                                           |
| 667 | 1,2,3,5,7,2 4,6,8,25,2<br>6,27,30 8,29,31,32 | 2 P21588,Q9JJ50                                                  |
| 668 | 1,2,3,5,7,2 4,6,8,25,2<br>6,27,31 8,29,30,32 | 3 P20766,Q5RLM2,Q62714                                           |
| 669 | 1,2,3,5,7,2 4,6,8,25,2<br>6,27,32 8,29,30,31 | 2 Q03191,Q9JJ50                                                  |
| 670 | 1,2,3,5,7,2 4,6,8,25,2<br>6,28,29 7,30,31,32 | 5 P00762,P47967,P54921,P97840,Q9QYP1                             |
| 671 | 1,2,3,5,7,2 4,6,8,25,2<br>6,28,30 7,29,31,32 | 5 P00714,P00762,P47967,Q5RLM2,Q9WUW8                             |
| 672 | 1,2,3,5,7,2 4,6,8,25,2<br>6,28,31 7,29,30,32 | 3 P00714,P00762,Q5RLM2                                           |
| 673 | 1,2,3,5,7,2 4,6,8,25,2<br>6,28,32 7,29,30,31 | 1 P47967                                                         |
| 674 | 1,2,3,5,7,2 4,6,8,25,2<br>6,29,30 7,28,31,32 | 5 P22006,P22282,P36374,P47967,Q9WUW8                             |
| 675 | 1,2,3,5,7,2 4,6,8,25,2<br>6,29,31 7,28,30,32 | 2 P20766,Q6AYR9                                                  |
| 676 | 1,2,3,5,7,2 4,6,8,25,2<br>6,29,32 7,28,30,31 | 1 P47967                                                         |
| 677 | 1,2,3,5,7,2 4,6,8,25,2<br>6,30,31 7,28,29,32 | 9 P0C0A9,P20766,P22282,P36374,P47727,Q6AYR9,Q812E4,Q8CFN2,Q9Z2L0 |
| 678 | 1,2,3,5,7,2 4,6,8,25,2<br>6,30,32 7,28,29,31 | 3 P36374,Q99MH3,Q9WUW8                                           |
| 679 | 1,2,3,5,7,2 4,6,8,25,2<br>6,31,32 7,28,29,30 | 2 P20766,Q62714                                                  |
| 680 | 1,2,3,5,7,2 4,6,8,25,2<br>7,28,29 6,30,31,32 | 5 P00507,P47967,P54921,P97840,Q6AY61                             |

|     |                        |                          |   |                                           |
|-----|------------------------|--------------------------|---|-------------------------------------------|
| 681 | 1,2,3,5,7,2<br>7,28,30 | 4,6,8,25,2<br>6,29,31,32 | 2 | P19218,P47967                             |
| 682 | 1,2,3,5,7,2<br>7,28,31 | 4,6,8,25,2<br>6,29,30,32 | 2 | P47967,Q6AY61                             |
| 683 | 1,2,3,5,7,2<br>7,28,32 | 4,6,8,25,2<br>6,29,30,31 | 4 | P47967,Q03191,Q62761;Q62762;Q62763,Q6AY61 |
| 684 | 1,2,3,5,7,2<br>7,29,30 | 4,6,8,25,2<br>6,28,31,32 | 4 | O54728,P00731,P22006,P47967               |
| 685 | 1,2,3,5,7,2<br>7,29,31 | 4,6,8,25,2<br>6,28,30,32 | 3 | O54728,P08649,Q6AY61                      |
| 686 | 1,2,3,5,7,2<br>7,29,32 | 4,6,8,25,2<br>6,28,30,31 | 4 | P47967,Q03191,Q6AY61,Q9JJ50               |
| 687 | 1,2,3,5,7,2<br>7,30,31 | 4,6,8,25,2<br>6,28,29,32 | 5 | O54728,P00731,P08649,P20766,P30120        |
| 688 | 1,2,3,5,7,2<br>7,30,32 | 4,6,8,25,2<br>6,28,29,31 | 3 | P70549,Q03191,Q6P6R2                      |
| 689 | 1,2,3,5,7,2<br>7,31,32 | 4,6,8,25,2<br>6,28,29,30 | 4 | P20766,Q03191,Q62714,Q6AY61               |
| 690 | 1,2,3,5,7,2<br>8,29,30 | 4,6,8,25,2<br>6,27,31,32 | 5 | P00762,P47967,P54921,P97840,Q9WUW8        |
| 691 | 1,2,3,5,7,2<br>8,29,31 | 4,6,8,25,2<br>6,27,30,32 | 4 | P00762,P47967,P54921,Q6AY61               |
| 692 | 1,2,3,5,7,2<br>8,29,32 | 4,6,8,25,2<br>6,27,30,31 | 3 | P47967,P54921,Q6AY61                      |
| 693 | 1,2,3,5,7,2<br>8,30,31 | 4,6,8,25,2<br>6,27,29,32 | 0 |                                           |
| 694 | 1,2,3,5,7,2<br>8,30,32 | 4,6,8,25,2<br>6,27,29,31 | 0 |                                           |
| 695 | 1,2,3,5,7,2<br>8,31,32 | 4,6,8,25,2<br>6,27,29,30 | 2 | Q6AY61,Q811M5                             |
| 696 | 1,2,3,5,7,2<br>9,30,31 | 4,6,8,25,2<br>6,27,28,32 | 6 | O54728,P08649,P22282,P26342,Q6AYR9,Q9QWN8 |
| 697 | 1,2,3,5,7,2<br>9,30,32 | 4,6,8,25,2<br>6,27,28,31 | 3 | P01835,P26342,Q9WUW8                      |
| 698 | 1,2,3,5,7,2<br>9,31,32 | 4,6,8,25,2<br>6,27,28,30 | 3 | P08649,P26342,Q6AY61                      |
| 699 | 1,2,3,5,7,3<br>0,31,32 | 4,6,8,25,2<br>6,27,28,29 | 5 | P08649,P20646,P22273,P26342,Q6P6R2        |
| 700 | 1,2,3,5,8,2<br>5,26,27 | 4,6,7,28,2<br>9,30,31,32 | 3 | P00714,P22006,P97580                      |

|     |                        |                          |    |                                                                                                   |
|-----|------------------------|--------------------------|----|---------------------------------------------------------------------------------------------------|
| 701 | 1,2,3,5,8,2<br>5,26,28 | 4,6,7,27,2<br>9,30,31,32 | 3  | P00714,P22006,P80299                                                                              |
| 702 | 1,2,3,5,8,2<br>5,26,29 | 4,6,7,27,2<br>8,30,31,32 | 3  | P00714,P22006,Q8VD89                                                                              |
| 703 | 1,2,3,5,8,2<br>5,26,30 | 4,6,7,27,2<br>8,29,31,32 | 14 | O88797,P00714,P11598,P22006,P22283,P36374,P80299,Q05511,Q63617,Q6IFU7,Q6IFW6,Q6IG05,Q6IMF3,Q99MH3 |
| 704 | 1,2,3,5,8,2<br>5,26,31 | 4,6,7,27,2<br>8,29,30,32 | 3  | P00714,P36376,Q63617                                                                              |
| 705 | 1,2,3,5,8,2<br>5,26,32 | 4,6,7,27,2<br>8,29,30,31 | 3  | P01681,Q63617,Q99MH3                                                                              |
| 706 | 1,2,3,5,8,2<br>5,27,28 | 4,6,7,26,2<br>9,30,31,32 | 3  | P00714,P36376,P36860                                                                              |
| 707 | 1,2,3,5,8,2<br>5,27,29 | 4,6,7,26,2<br>8,30,31,32 | 2  | P00731,P22006                                                                                     |
| 708 | 1,2,3,5,8,2<br>5,27,30 | 4,6,7,26,2<br>8,29,31,32 | 12 | P00731,P22006,Q05511,Q4FZU2,Q63617,Q6IFU7,Q6IFU8,Q6IFW6,Q6IG02,Q6IG05,Q6IMF3,Q6P6Q2               |
| 709 | 1,2,3,5,8,2<br>5,27,31 | 4,6,7,26,2<br>8,29,30,32 | 3  | P23739,P36376,Q63617                                                                              |
| 710 | 1,2,3,5,8,2<br>5,27,32 | 4,6,7,26,2<br>8,29,30,31 | 1  | P01681                                                                                            |
| 711 | 1,2,3,5,8,2<br>5,28,29 | 4,6,7,26,2<br>7,30,31,32 | 2  | P00714,P22006                                                                                     |
| 712 | 1,2,3,5,8,2<br>5,28,30 | 4,6,7,26,2<br>7,29,31,32 | 7  | O88797,P00714,P36376,Q6IFU7,Q6IFW6,Q6IG05,Q6IMF3                                                  |
| 713 | 1,2,3,5,8,2<br>5,28,31 | 4,6,7,26,2<br>7,29,30,32 | 3  | P00714,P36376,Q811M5                                                                              |
| 714 | 1,2,3,5,8,2<br>5,28,32 | 4,6,7,26,2<br>7,29,30,31 | 2  | P01681,Q811M5                                                                                     |
| 715 | 1,2,3,5,8,2<br>5,29,30 | 4,6,7,26,2<br>7,28,31,32 | 10 | O88797,P11598,P22006,Q6IFU7,Q6IFU8,Q6IFW6,Q6IG02,Q6IG05,Q6IMF3,Q6P6Q2                             |
| 716 | 1,2,3,5,8,2<br>5,29,31 | 4,6,7,26,2<br>7,28,30,32 | 2  | P36376,Q8VD89                                                                                     |
| 717 | 1,2,3,5,8,2<br>5,29,32 | 4,6,7,26,2<br>7,28,30,31 | 1  | P01681                                                                                            |
| 718 | 1,2,3,5,8,2<br>5,30,31 | 4,6,7,26,2<br>7,28,29,32 | 11 | O88797,P00714,P11598,P22283,P36376,Q05511,Q63617,Q6IFU7,Q6IFW6,Q6IG05,Q6IMF3                      |
| 719 | 1,2,3,5,8,2<br>5,30,32 | 4,6,7,26,2<br>7,28,29,31 | 10 | O88797,P01681,P20646,Q05511,Q63617,Q6IFU7,Q6IFW6,Q6IG05,Q6IMF3,Q6P6R2                             |
| 720 | 1,2,3,5,8,2<br>5,31,32 | 4,6,7,26,2<br>7,28,29,30 | 7  | P01681,P20646,P21588,P36376,Q63617,Q80WL1,Q811M5                                                  |



|     |                        |                          |    |                                                                                     |
|-----|------------------------|--------------------------|----|-------------------------------------------------------------------------------------|
| 721 | 1,2,3,5,8,2<br>6,27,28 | 4,6,7,25,2<br>9,30,31,32 | 3  | P00714,P47967,Q5RLM2                                                                |
| 722 | 1,2,3,5,8,2<br>6,27,29 | 4,6,7,25,2<br>8,30,31,32 | 4  | P00731,P22006,P25809,Q9JJ50                                                         |
| 723 | 1,2,3,5,8,2<br>6,27,30 | 4,6,7,25,2<br>8,29,31,32 | 9  | P00731,P97580,Q63617,Q6IFU7,Q6IFU8,Q6IFW6,Q6IG05,Q6IMF3,Q6P6Q2                      |
| 724 | 1,2,3,5,8,2<br>6,27,31 | 4,6,7,25,2<br>8,29,30,32 | 1  | P36376                                                                              |
| 725 | 1,2,3,5,8,2<br>6,27,32 | 4,6,7,25,2<br>8,29,30,31 | 1  | Q9JJ50                                                                              |
| 726 | 1,2,3,5,8,2<br>6,28,29 | 4,6,7,25,2<br>7,30,31,32 | 4  | P00714,P22006,P47967,Q9QYP1                                                         |
| 727 | 1,2,3,5,8,2<br>6,28,30 | 4,6,7,25,2<br>7,29,31,32 | 4  | P00714,Q6IFU7,Q6IG05,Q99MH3                                                         |
| 728 | 1,2,3,5,8,2<br>6,28,31 | 4,6,7,25,2<br>7,29,30,32 | 3  | P00714,P36376,Q5RLM2                                                                |
| 729 | 1,2,3,5,8,2<br>6,28,32 | 4,6,7,25,2<br>7,29,30,31 | 1  | Q99MH3                                                                              |
| 730 | 1,2,3,5,8,2<br>6,29,30 | 4,6,7,25,2<br>7,28,31,32 | 7  | O88797,P22006,P36374,Q6IFU7,Q6IFW6,Q6IG05,Q6IMF3                                    |
| 731 | 1,2,3,5,8,2<br>6,29,31 | 4,6,7,25,2<br>7,28,30,32 | 0  |                                                                                     |
| 732 | 1,2,3,5,8,2<br>6,29,32 | 4,6,7,25,2<br>7,28,30,31 | 0  |                                                                                     |
| 733 | 1,2,3,5,8,2<br>6,30,31 | 4,6,7,25,2<br>7,28,29,32 | 12 | P00714,P0C0A9,P22283,Q63617,Q6AYR8,Q6AYR9,Q6IG05,Q6IMF3,Q812E4,Q8CGS4,Q99MH3,Q9Z2L0 |
| 734 | 1,2,3,5,8,2<br>6,30,32 | 4,6,7,25,2<br>7,28,29,31 | 5  | O88797,Q63617,Q6IFU7,Q6IG05,Q99MH3                                                  |
| 735 | 1,2,3,5,8,2<br>6,31,32 | 4,6,7,25,2<br>7,28,29,30 | 2  | Q63617,Q99MH3                                                                       |
| 736 | 1,2,3,5,8,2<br>7,28,29 | 4,6,7,25,2<br>6,30,31,32 | 4  | P00731,P25809,P47967,Q9WVK7                                                         |
| 737 | 1,2,3,5,8,2<br>7,28,30 | 4,6,7,25,2<br>6,29,31,32 | 8  | P00731,P19218,Q6AYR8,Q6IFU7,Q6IFW6,Q6IG05,Q6IMF3,Q6P6Q2                             |
| 738 | 1,2,3,5,8,2<br>7,28,31 | 4,6,7,25,2<br>6,29,30,32 | 1  | P36376                                                                              |
| 739 | 1,2,3,5,8,2<br>7,28,32 | 4,6,7,25,2<br>6,29,30,31 | 0  |                                                                                     |
| 740 | 1,2,3,5,8,2<br>7,29,30 | 4,6,7,25,2<br>6,28,31,32 | 10 | P00731,P19218,P22006,Q6IFU7,Q6IFU8,Q6IFW6,Q6IG02,Q6IG05,Q6IMF3,Q6P6Q2               |

|     |                         |                          |    |                                                                              |
|-----|-------------------------|--------------------------|----|------------------------------------------------------------------------------|
| 741 | 1,2,3,5,8,2<br>7,29,31  | 4,6,7,25,2<br>6,28,30,32 | 3  | P00731,P36376,Q5PQL7                                                         |
| 742 | 1,2,3,5,8,2<br>7,29,32  | 4,6,7,25,2<br>6,28,30,31 | 0  |                                                                              |
| 743 | 1,2,3,5,8,2<br>7,30,31  | 4,6,7,25,2<br>6,28,29,32 | 11 | P00731,P23739,P36376,Q63617,Q6AYR8,Q6IFU7,Q6IFU8,Q6IFW6,Q6IG05,Q6IMF3,Q6P6Q2 |
| 744 | 1,2,3,5,8,2<br>7,30,32  | 4,6,7,25,2<br>6,28,29,31 | 8  | P00731,P20646,P70549,Q6IFU7,Q6IFW6,Q6IG05,Q6IMF3,Q6P6Q2                      |
| 745 | 1,2,3,5,8,2<br>7,31,32  | 4,6,7,25,2<br>6,28,29,30 | 2  | P23739,P36376                                                                |
| 746 | 1,2,3,5,8,2<br>8,29,30  | 4,6,7,25,2<br>6,27,31,32 | 6  | O88797,Q6IFU7,Q6IFW6,Q6IG05,Q6IMF3,Q6P6Q2                                    |
| 747 | 1,2,3,5,8,2<br>8,29,31  | 4,6,7,25,2<br>6,27,30,32 | 1  | P36376                                                                       |
| 748 | 1,2,3,5,8,2<br>8,29,32  | 4,6,7,25,2<br>6,27,30,31 | 1  | Q9QYP1                                                                       |
| 749 | 1,2,3,5,8,2<br>8,30,31  | 4,6,7,25,2<br>6,27,29,32 | 6  | P00714,P36376,Q6AYR8,Q6IFU7,Q6IG05,Q6IMF3                                    |
| 750 | 1,2,3,5,8,2<br>8,30,32  | 4,6,7,25,2<br>6,27,29,31 | 4  | O88797,Q6IFU7,Q6IG05,Q6IMF3                                                  |
| 751 | 1,2,3,5,8,2<br>8,31,32  | 4,6,7,25,2<br>6,27,29,30 | 2  | P36376,Q811M5                                                                |
| 752 | 1,2,3,5,8,2<br>9,30,31  | 4,6,7,25,2<br>6,27,28,32 | 10 | O88797,P0C0A9,Q5RJR2,Q6IFU7,Q6IFU8,Q6IFW6,Q6IG02,Q6IG05,Q6IMF3,Q6P6Q2        |
| 753 | 1,2,3,5,8,2<br>9,30,32  | 4,6,7,25,2<br>6,27,28,31 | 6  | O88797,Q6IFU7,Q6IFW6,Q6IG05,Q6IMF3,Q6P6Q2                                    |
| 754 | 1,2,3,5,8,2<br>9,31,32  | 4,6,7,25,2<br>6,27,28,30 | 0  |                                                                              |
| 755 | 1,2,3,5,8,3<br>0,31,32  | 4,6,7,25,2<br>6,27,28,29 | 9  | O88797,P0C0A9,P20646,P63081,Q63617,Q6IFU7,Q6IG05,Q6IMF3,Q6P6R2               |
| 756 | 1,2,3,5,25,<br>26,27,28 | 4,6,7,8,29,<br>30,31,32  | 2  | P00714,P82471                                                                |
| 757 | 1,2,3,5,25,<br>26,27,29 | 4,6,7,8,28,<br>30,31,32  | 7  | P00714,P22006,P82471,Q63617,Q99041,Q9JJ50,Q9QZK9                             |
| 758 | 1,2,3,5,25,<br>26,27,30 | 4,6,7,8,28,<br>29,31,32  | 10 | P00714,P02780,P08723,P11598,P22273,P22282,P30120,P82471,Q63617,Q99041        |
| 759 | 1,2,3,5,25,<br>26,27,31 | 4,6,7,8,28,<br>29,30,32  | 7  | P00714,P02780,P08723,P22273,P22282,Q63617,Q99041                             |
| 760 | 1,2,3,5,25,<br>26,27,32 | 4,6,7,8,28,<br>29,30,31  | 5  | O70257,P22273,P82471,Q63617,Q99041                                           |

|     |                                              |    |                                                                                                                                                                         |
|-----|----------------------------------------------|----|-------------------------------------------------------------------------------------------------------------------------------------------------------------------------|
| 761 | 1,2,3,5,25, 4,6,7,8,27,<br>26,28,29 30,31,32 | 6  | P00714,P22006,P22282,P82471,Q99041,Q9QZK9                                                                                                                               |
| 762 | 1,2,3,5,25, 4,6,7,8,27,<br>26,28,30 29,31,32 | 6  | P00714,P22273,P22282,P82471,Q4G075,Q99041                                                                                                                               |
| 763 | 1,2,3,5,25, 4,6,7,8,27,<br>26,28,31 29,30,32 | 5  | P00714,P22273,P22282,Q4G075,Q99041                                                                                                                                      |
| 764 | 1,2,3,5,25, 4,6,7,8,27,<br>26,28,32 29,30,31 | 4  | P22273,P82471,Q4G075,Q99041                                                                                                                                             |
| 765 | 1,2,3,5,25, 4,6,7,8,27,<br>26,29,30 28,31,32 | 13 | P00714,P06761,P11598,P22006,P22273,P22282,P22283,P36374,P82471,Q63617,Q6AYR9,Q99041,Q9QZK9                                                                              |
| 766 | 1,2,3,5,25, 4,6,7,8,27,<br>26,29,31 28,30,32 | 10 | P00714,P11598,P18298,P22273,P22282,Q63617,Q6AYR9,Q6RUV5,Q8VD89,Q99041                                                                                                   |
| 767 | 1,2,3,5,25, 4,6,7,8,27,<br>26,29,32 28,30,31 | 5  | P22273,P22282,P82471,Q63617,Q99041                                                                                                                                      |
| 768 | 1,2,3,5,25, 4,6,7,8,27,<br>26,30,31 28,29,32 | 24 | P00714,P02780,P04905,P06761,P08723,P0C0A9,P11598,P18298,P22273,P22282,P22283,P30120,P46462,P47727,Q4G075,Q5M8C6,Q62902,Q63617,Q6AYR9,Q812E4,Q8CFN2,Q99041,Q9QW07,Q9Z2L0 |
| 769 | 1,2,3,5,25, 4,6,7,8,27,<br>26,30,32 28,29,31 | 12 | P06761,P11598,P22273,P22282,P22283,P82471,P97523,Q4G075,Q63617,Q812E4,Q99041,Q99MH3                                                                                     |
| 770 | 1,2,3,5,25, 4,6,7,8,27,<br>26,31,32 28,29,30 | 10 | P06761,P11598,P22273,P22282,P22283,Q4G075,Q63617,Q812E4,Q99041,Q9Z2L0                                                                                                   |
| 771 | 1,2,3,5,25, 4,6,7,8,26,<br>27,28,29 30,31,32 | 5  | P00714,P22006,P82471,Q6AY61,Q99041                                                                                                                                      |
| 772 | 1,2,3,5,25, 4,6,7,8,26,<br>27,28,30 29,31,32 | 3  | P00714,P82471,Q9QX74                                                                                                                                                    |
| 773 | 1,2,3,5,25, 4,6,7,8,26,<br>27,28,31 29,30,32 | 2  | P00714,Q99041                                                                                                                                                           |
| 774 | 1,2,3,5,25, 4,6,7,8,26,<br>27,28,32 29,30,31 | 6  | O70257,P82471,Q62761;Q62762;Q62763,Q6AY61,Q99041,Q9QX74                                                                                                                 |
| 775 | 1,2,3,5,25, 4,6,7,8,26,<br>27,29,30 28,31,32 | 10 | O54728,P11598,P22006,P22273,P22282,P82471,Q63617,Q6IFW6,Q6IG02,Q99041                                                                                                   |
| 776 | 1,2,3,5,25, 4,6,7,8,26,<br>27,29,31 28,30,32 | 5  | O54728,P22273,P22282,Q63617,Q99041                                                                                                                                      |
| 777 | 1,2,3,5,25, 4,6,7,8,26,<br>27,29,32 28,30,31 | 4  | P22273,P82471,Q6AY61,Q99041                                                                                                                                             |
| 778 | 1,2,3,5,25, 4,6,7,8,26,<br>27,30,31 28,29,32 | 13 | O54728,P02780,P06761,P08723,P11598,P22273,P22282,P30120,Q63617,Q6P6R2,Q99041,Q9QW07,Q9QX74                                                                              |
| 779 | 1,2,3,5,25, 4,6,7,8,26,<br>27,30,32 28,29,31 | 12 | P06761,P11598,P21674,P22273,P70549,P82471,Q03191,Q63617,Q6P6R2,Q99041,Q9QX74,Q9WTT6                                                                                     |
| 780 | 1,2,3,5,25, 4,6,7,8,26,<br>27,31,32 28,29,30 | 8  | O70257,P22273,P23739,Q03191,Q63617,Q6P6R2,Q99041,Q9QX74                                                                                                                 |

|     |                                              |                                                                                                                               |
|-----|----------------------------------------------|-------------------------------------------------------------------------------------------------------------------------------|
| 781 | 1,2,3,5,25, 4,6,7,8,26,<br>28,29,30 27,31,32 | 6 P00714,P22006,P22273,P22282,P82471,Q99041                                                                                   |
| 782 | 1,2,3,5,25, 4,6,7,8,26,<br>28,29,31 27,30,32 | 4 P00714,P22273,P22282,Q99041                                                                                                 |
| 783 | 1,2,3,5,25, 4,6,7,8,26,<br>28,29,32 27,30,31 | 3 P22273,Q6AY61,Q99041                                                                                                        |
| 784 | 1,2,3,5,25, 4,6,7,8,26,<br>28,30,31 27,29,32 | 8 P00714,P06761,P11598,P22273,P22282,Q4G075,Q99041,Q9QX74                                                                     |
| 785 | 1,2,3,5,25, 4,6,7,8,26,<br>28,30,32 27,29,31 | 8 P22273,P22282,P82471,Q4G075,Q62975,Q99041,Q9QX74,Q9WTT6                                                                     |
| 786 | 1,2,3,5,25, 4,6,7,8,26,<br>28,31,32 27,29,30 | 6 P22273,P22282,Q4G075,Q811M5,Q99041,Q9QX74                                                                                   |
| 787 | 1,2,3,5,25, 4,6,7,8,26,<br>29,30,31 27,28,32 | 13 O54728,P06761,P07150,P08723,P11598,P22273,P22282,P22283,Q63617,Q6AYR9,Q99041,Q9Q<br>WN8,Q9WTT6                             |
| 788 | 1,2,3,5,25, 4,6,7,8,26,<br>29,30,32 27,28,31 | 10 P06761,P07150,P11598,P22273,P22282,P82471,P97523,Q63617,Q99041,Q9WTT6                                                      |
| 789 | 1,2,3,5,25, 4,6,7,8,26,<br>29,31,32 27,28,30 | 8 P06761,P07150,P11598,P22273,P22282,Q63617,Q99041,Q9WTT6                                                                     |
| 790 | 1,2,3,5,25, 4,6,7,8,26,<br>30,31,32 27,28,29 | 17 P06761,P07150,P11598,P20646,P22273,P22282,P22283,P26342,Q4G075,Q63617,Q6P6R2,Q812<br>E4,Q99041,Q9QW07,Q9QX74,Q9WTT6,Q9Z2L0 |
| 791 | 1,2,3,5,26, 4,6,7,8,25,<br>27,28,29 30,31,32 | 3 P00714,P47967,P82471                                                                                                        |
| 792 | 1,2,3,5,26, 4,6,7,8,25,<br>27,28,30 29,31,32 | 3 P00714,P21588,P82471                                                                                                        |
| 793 | 1,2,3,5,26, 4,6,7,8,25,<br>27,28,31 29,30,32 | 1 P00714                                                                                                                      |
| 794 | 1,2,3,5,26, 4,6,7,8,25,<br>27,28,32 29,30,31 | 1 P82471                                                                                                                      |
| 795 | 1,2,3,5,26, 4,6,7,8,25,<br>27,29,30 28,31,32 | 5 P21588,P22282,P82471,Q63617,Q9JJ50                                                                                          |
| 796 | 1,2,3,5,26, 4,6,7,8,25,<br>27,29,31 28,30,32 | 3 P22282,Q63617,Q99041                                                                                                        |
| 797 | 1,2,3,5,26, 4,6,7,8,25,<br>27,29,32 28,30,31 | 2 P82471,Q9JJ50                                                                                                               |
| 798 | 1,2,3,5,26, 4,6,7,8,25,<br>27,30,31 28,29,32 | 12 P06761,P08723,P0C0A9,P11598,P22273,P22282,P30120,Q5M8C6,Q63617,Q812E4,Q9QW07,Q<br>9Z2L0                                    |
| 799 | 1,2,3,5,26, 4,6,7,8,25,<br>27,30,32 28,29,31 | 4 P12020,P22273,P82471,Q63617                                                                                                 |
| 800 | 1,2,3,5,26, 4,6,7,8,25,<br>27,31,32 28,29,30 | 4 P22273,Q63617,Q99041,Q9QW07                                                                                                 |

|     |                                              |    |                                                                                                                 |
|-----|----------------------------------------------|----|-----------------------------------------------------------------------------------------------------------------|
| 801 | 1,2,3,5,26, 4,6,7,8,25,<br>28,29,30 27,31,32 | 4  | P00714,P22273,P22282,P82471                                                                                     |
| 802 | 1,2,3,5,26, 4,6,7,8,25,<br>28,29,31 27,30,32 | 7  | O70417,P00714,P22273,P22282,Q01205,Q99041,Q99376                                                                |
| 803 | 1,2,3,5,26, 4,6,7,8,25,<br>28,29,32 27,30,31 | 2  | P22273,P82471                                                                                                   |
| 804 | 1,2,3,5,26, 4,6,7,8,25,<br>28,30,31 27,29,32 | 5  | P00714,P0C0A9,P22273,P22282,Q4G075                                                                              |
| 805 | 1,2,3,5,26, 4,6,7,8,25,<br>28,30,32 27,29,31 | 5  | P22273,P22282,P82471,Q4G075,Q99MH3                                                                              |
| 806 | 1,2,3,5,26, 4,6,7,8,25,<br>28,31,32 27,29,30 | 4  | P22273,P22282,Q4G075,Q99041                                                                                     |
| 807 | 1,2,3,5,26, 4,6,7,8,25,<br>29,30,31 27,28,32 | 14 | P06761,P08723,P0C0A9,P11598,P22273,P22282,P22283,Q5M8C6,Q63617,Q6AYR9,Q812E4,Q99041,Q9QW07,Q9QWN8               |
| 808 | 1,2,3,5,26, 4,6,7,8,25,<br>29,30,32 27,28,31 | 8  | P06761,P0C0A9,P22273,P22282,P82471,Q4G075,Q63617,Q99041                                                         |
| 809 | 1,2,3,5,26, 4,6,7,8,25,<br>29,31,32 27,28,30 | 8  | O70417,P0C0A9,P22273,P22282,Q4G075,Q5QE79,Q63617,Q99041                                                         |
| 810 | 1,2,3,5,26, 4,6,7,8,25,<br>30,31,32 27,28,29 | 16 | P06761,P0C0A9,P11598,P20646,P22273,P22282,P22283,P47727,Q4G075,Q63617,Q812E4,Q99041,Q99MH3,Q9QW07,Q9WTT6,Q9ZZL0 |
| 811 | 1,2,3,5,27, 4,6,7,8,25,<br>28,29,30 26,31,32 | 2  | P47967,P82471                                                                                                   |
| 812 | 1,2,3,5,27, 4,6,7,8,25,<br>28,29,31 26,30,32 | 2  | Q6AY61,Q99041                                                                                                   |
| 813 | 1,2,3,5,27, 4,6,7,8,25,<br>28,29,32 26,30,31 | 3  | P47967,Q62761;Q62762;Q62763,Q6AY61                                                                              |
| 814 | 1,2,3,5,27, 4,6,7,8,25,<br>28,30,31 26,29,32 | 1  | P22273                                                                                                          |
| 815 | 1,2,3,5,27, 4,6,7,8,25,<br>28,30,32 26,29,31 | 3  | P22273,P82471,Q9QX74                                                                                            |
| 816 | 1,2,3,5,27, 4,6,7,8,25,<br>28,31,32 26,29,30 | 3  | P22273,Q6AY61,Q9QX74                                                                                            |
| 817 | 1,2,3,5,27, 4,6,7,8,25,<br>29,30,31 26,28,32 | 10 | O54728,P00731,P07150,P08649,P11598,P22273,P22282,Q63617,Q99041,Q9QW07                                           |
| 818 | 1,2,3,5,27, 4,6,7,8,25,<br>29,30,32 26,28,31 | 3  | P22273,P82471,Q63617                                                                                            |
| 819 | 1,2,3,5,27, 4,6,7,8,25,<br>29,31,32 26,28,30 | 3  | P22273,Q6AY61,Q99041                                                                                            |
| 820 | 1,2,3,5,27, 4,6,7,8,25,<br>30,31,32 26,28,29 | 9  | P06761,P20646,P22273,P22282,Q63617,Q6P6R2,Q9QW07,Q9QX74,Q9WTT6                                                  |

|     |                                              |    |                                                                                                                 |
|-----|----------------------------------------------|----|-----------------------------------------------------------------------------------------------------------------|
| 821 | 1,2,3,5,28, 4,6,7,8,25,<br>29,30,31 26,27,32 | 3  | P22273,P22282,Q99041                                                                                            |
| 822 | 1,2,3,5,28, 4,6,7,8,25,<br>29,30,32 26,27,31 | 3  | P22273,P22282,Q9Z0V6                                                                                            |
| 823 | 1,2,3,5,28, 4,6,7,8,25,<br>29,31,32 26,27,30 | 4  | O70417,P22273,Q6AY61,Q99041                                                                                     |
| 824 | 1,2,3,5,28, 4,6,7,8,25,<br>30,31,32 26,27,29 | 6  | P06761,P22273,P22282,Q4G075,Q9QX74,Q9WTT6                                                                       |
| 825 | 1,2,3,5,29, 4,6,7,8,25,<br>30,31,32 26,27,28 | 16 | P06761,P07150,P08649,P0C0A9,P11598,P20646,P22273,P22282,P26342,P36860,P63081,Q4G075,Q63617,Q99041,Q9QW07,Q9WTT6 |
| 826 | 1,2,3,6,7,8 4,5,27,28,<br>,25,26 29,30,31,32 | 6  | O54800;Q5DWV2,P06911,P08649,P97580,Q63598,Q99MH3                                                                |
| 827 | 1,2,3,6,7,8 4,5,26,28,<br>,25,27 29,30,31,32 | 8  | O54800;Q5DWV2,P02631,P06911,P50115,P97580,Q30KJ2,Q62894,Q66H69                                                  |
| 828 | 1,2,3,6,7,8 4,5,26,27,<br>,25,28 29,30,31,32 | 9  | O54800;Q5DWV2,P02631,P06911,P12020,P36860,Q09030,Q5GRG2,Q63598,Q9QW07                                           |
| 829 | 1,2,3,6,7,8 4,5,26,27,<br>,25,29 28,30,31,32 | 3  | O54800;Q5DWV2,P02631,P06911                                                                                     |
| 830 | 1,2,3,6,7,8 4,5,26,27,<br>,25,30 28,29,31,32 | 9  | O54800;Q5DWV2,O70417,P02631,P06911,P36374,P80202,P97580,Q09030,Q6IG05                                           |
| 831 | 1,2,3,6,7,8 4,5,26,27,<br>,25,31 28,29,30,32 | 8  | O54800;Q5DWV2,P06911,P12020,P20766,P80202,Q09030,Q63532,Q63598                                                  |
| 832 | 1,2,3,6,7,8 4,5,26,27,<br>,25,32 28,29,30,31 | 5  | O54800;Q5DWV2,P02631,P06911,P80202,Q09030                                                                       |
| 833 | 1,2,3,6,7,8 4,5,25,28,<br>,26,27 29,30,31,32 | 8  | O54800;Q5DWV2,P15399,P50115,P97580,Q30KJ2,Q62894,Q66H69,Q99MH3                                                  |
| 834 | 1,2,3,6,7,8 4,5,25,27,<br>,26,28 29,30,31,32 | 4  | P97580,Q63598,Q99MH3,Q9JI85                                                                                     |
| 835 | 1,2,3,6,7,8 4,5,25,27,<br>,26,29 28,30,31,32 | 5  | O54800;Q5DWV2,O70594,P02783,P20759,P97580                                                                       |

|     |                       |                               |                                                           |
|-----|-----------------------|-------------------------------|-----------------------------------------------------------|
| 836 | 1,2,3,6,7,8<br>,26,30 | 4,5,25,27,<br>28,29,31,3<br>2 | 6 O54800;Q5DWV2,P36374,P97580,P97615,Q6IG05,Q99MH3        |
| 837 | 1,2,3,6,7,8<br>,26,31 | 4,5,25,27,<br>28,29,30,3<br>2 | 7 O54800;Q5DWV2,P20766,P57113,Q62714,Q63532,Q63598,Q99MH3 |
| 838 | 1,2,3,6,7,8<br>,26,32 | 4,5,25,27,<br>28,29,30,3<br>1 | 7 O54800;Q5DWV2,O89117,P57113,P97580,P97615,Q62714,Q99MH3 |
| 839 | 1,2,3,6,7,8<br>,27,28 | 4,5,25,26,<br>29,30,31,3<br>2 | 7 P06911,P15399,P19218,P50115,P97580,Q66H69,Q9JI85        |
| 840 | 1,2,3,6,7,8<br>,27,29 | 4,5,25,26,<br>28,30,31,3<br>2 | 6 P00731,P02783,P62804,P97580,Q00715,Q66H69               |
| 841 | 1,2,3,6,7,8<br>,27,30 | 4,5,25,26,<br>28,29,31,3<br>2 | 7 P00731,P19218,P97580,Q30KJ2,Q66H69,Q6IFU7,Q6IG05        |
| 842 | 1,2,3,6,7,8<br>,27,31 | 4,5,25,26,<br>28,29,30,3<br>2 | 5 P20766,P97580,Q62714,Q62894,Q63532                      |
| 843 | 1,2,3,6,7,8<br>,27,32 | 4,5,25,26,<br>28,29,30,3<br>1 | 3 O54800;Q5DWV2,P97580,P98166                             |
| 844 | 1,2,3,6,7,8<br>,28,29 | 4,5,25,26,<br>27,30,31,3<br>2 | 7 P06911,P21674,P62804,Q00715,Q9JI85,Q9QW07,Q9QYP1        |
| 845 | 1,2,3,6,7,8<br>,28,30 | 4,5,25,26,<br>27,29,31,3<br>2 | 1 P19218                                                  |
| 846 | 1,2,3,6,7,8<br>,28,31 | 4,5,25,26,<br>27,29,30,3<br>2 | 8 P06911,P12020,P20766,P21674,Q5GRG2,Q63532,Q63598,Q811M5 |
| 847 | 1,2,3,6,7,8<br>,28,32 | 4,5,25,26,<br>27,29,30,3<br>1 | 3 O89117,P02631,Q9JI85                                    |
| 848 | 1,2,3,6,7,8<br>,29,30 | 4,5,25,26,<br>27,28,31,3<br>2 | 4 O54800;Q5DWV2,P62804,Q6IFU7,Q6IG05                      |

|     |                        |                               |                                                                  |
|-----|------------------------|-------------------------------|------------------------------------------------------------------|
| 849 | 1,2,3,6,7,8<br>,29,31  | 4,5,25,26,<br>27,28,30,3<br>2 | 5 O70594,P12020,P20766,P21674,Q63532                             |
| 850 | 1,2,3,6,7,8<br>,29,32  | 4,5,25,26,<br>27,28,30,3<br>1 | 1 O54800;Q5DWV2                                                  |
| 851 | 1,2,3,6,7,8<br>,30,31  | 4,5,25,26,<br>27,28,29,3<br>2 | 8 O54800;Q5DWV2,O89117,P20766,P97615,Q09030,Q63532,Q6IG05,Q99MH3 |
| 852 | 1,2,3,6,7,8<br>,30,32  | 4,5,25,26,<br>27,28,29,3<br>1 | 7 O54800;Q5DWV2,O89117,P26342,P35280,P97615,Q6IG05,Q99MH3        |
| 853 | 1,2,3,6,7,8<br>,31,32  | 4,5,25,26,<br>27,28,29,3<br>0 | 7 O54800;Q5DWV2,O89117,P20766,P57113,P97615,Q62714,Q63532        |
| 854 | 1,2,3,6,7,2<br>5,26,27 | 4,5,8,28,2<br>9,30,31,32      | 2 O54800;Q5DWV2,P63081                                           |
| 855 | 1,2,3,6,7,2<br>5,26,28 | 4,5,8,27,2<br>9,30,31,32      | 2 O54800;Q5DWV2,Q63598                                           |
| 856 | 1,2,3,6,7,2<br>5,26,29 | 4,5,8,27,2<br>8,30,31,32      | 1 O54800;Q5DWV2                                                  |
| 857 | 1,2,3,6,7,2<br>5,26,30 | 4,5,8,27,2<br>8,29,31,32      | 3 O54800;Q5DWV2,P36374,Q99MH3                                    |
| 858 | 1,2,3,6,7,2<br>5,26,31 | 4,5,8,27,2<br>8,29,30,32      | 6 O54800;Q5DWV2,P18298,P20766,P57113,Q63598,Q99MH3               |
| 859 | 1,2,3,6,7,2<br>5,26,32 | 4,5,8,27,2<br>8,29,30,31      | 2 O54800;Q5DWV2,Q99MH3                                           |
| 860 | 1,2,3,6,7,2<br>5,27,28 | 4,5,8,26,2<br>9,30,31,32      | 2 P0DMW0;P0DMW1,P63081                                           |
| 861 | 1,2,3,6,7,2<br>5,27,29 | 4,5,8,26,2<br>8,30,31,32      | 1 O54728                                                         |
| 862 | 1,2,3,6,7,2<br>5,27,30 | 4,5,8,26,2<br>8,29,31,32      | 2 O54728,O54800;Q5DWV2                                           |
| 863 | 1,2,3,6,7,2<br>5,27,31 | 4,5,8,26,2<br>8,29,30,32      | 3 O54728,P20766,Q62894                                           |
| 864 | 1,2,3,6,7,2<br>5,27,32 | 4,5,8,26,2<br>8,29,30,31      | 1 O54800;Q5DWV2                                                  |
| 865 | 1,2,3,6,7,2<br>5,28,29 | 4,5,8,26,2<br>7,30,31,32      | 0                                                                |
| 866 | 1,2,3,6,7,2<br>5,28,30 | 4,5,8,26,2<br>7,29,31,32      | 2 O54800;Q5DWV2,Q62975                                           |



|     |                        |                          |   |                                                         |
|-----|------------------------|--------------------------|---|---------------------------------------------------------|
| 867 | 1,2,3,6,7,2<br>5,28,31 | 4,5,8,26,2<br>7,29,30,32 | 2 | P20766,Q63598                                           |
| 868 | 1,2,3,6,7,2<br>5,28,32 | 4,5,8,26,2<br>7,29,30,31 | 2 | O54800;Q5DWV2,Q62975                                    |
| 869 | 1,2,3,6,7,2<br>5,29,30 | 4,5,8,26,2<br>7,28,31,32 | 4 | O54728,O54800;Q5DWV2,P01835,Q9QWN8                      |
| 870 | 1,2,3,6,7,2<br>5,29,31 | 4,5,8,26,2<br>7,28,30,32 | 4 | O54728,O54800;Q5DWV2,P20766,Q9QWN8                      |
| 871 | 1,2,3,6,7,2<br>5,29,32 | 4,5,8,26,2<br>7,28,30,31 | 2 | O54800;Q5DWV2,P01835                                    |
| 872 | 1,2,3,6,7,2<br>5,30,31 | 4,5,8,26,2<br>7,28,29,32 | 7 | O54728,O54800;Q5DWV2,P20766,Q09030,Q6AYR9,Q6P6R2,Q9QWN8 |
| 873 | 1,2,3,6,7,2<br>5,30,32 | 4,5,8,26,2<br>7,28,29,31 | 7 | O54800;Q5DWV2,P06760,P26342,Q62975,Q6P6R2,Q9QX74,Q9R168 |
| 874 | 1,2,3,6,7,2<br>5,31,32 | 4,5,8,26,2<br>7,28,29,30 | 4 | O54800;Q5DWV2,P20766,P26342,Q6P6R2                      |
| 875 | 1,2,3,6,7,2<br>6,27,28 | 4,5,8,25,2<br>9,30,31,32 | 1 | P0DMW0;P0DMW1                                           |
| 876 | 1,2,3,6,7,2<br>6,27,29 | 4,5,8,25,2<br>8,30,31,32 | 3 | P01835,P02783,Q9JJ50                                    |
| 877 | 1,2,3,6,7,2<br>6,27,30 | 4,5,8,25,2<br>8,29,31,32 | 3 | O54800;Q5DWV2,P21588,Q99MH3                             |
| 878 | 1,2,3,6,7,2<br>6,27,31 | 4,5,8,25,2<br>8,29,30,32 | 2 | P20766,Q62894                                           |
| 879 | 1,2,3,6,7,2<br>6,27,32 | 4,5,8,25,2<br>8,29,30,31 | 1 | O54800;Q5DWV2                                           |
| 880 | 1,2,3,6,7,2<br>6,28,29 | 4,5,8,25,2<br>7,30,31,32 | 5 | P00762,P01835,P21674,P23739,P47967                      |
| 881 | 1,2,3,6,7,2<br>6,28,30 | 4,5,8,25,2<br>7,29,31,32 | 4 | O54800;Q5DWV2,P00762,P01835,Q99MH3                      |
| 882 | 1,2,3,6,7,2<br>6,28,31 | 4,5,8,25,2<br>7,29,30,32 | 5 | P00762,P01835,P20766,P57113,Q63598                      |
| 883 | 1,2,3,6,7,2<br>6,28,32 | 4,5,8,25,2<br>7,29,30,31 | 3 | O54800;Q5DWV2,P01835,Q99MH3                             |
| 884 | 1,2,3,6,7,2<br>6,29,30 | 4,5,8,25,2<br>7,28,31,32 | 3 | O54800;Q5DWV2,P01835,P23739                             |
| 885 | 1,2,3,6,7,2<br>6,29,31 | 4,5,8,25,2<br>7,28,30,32 | 4 | O54800;Q5DWV2,P01835,P20766,P57113                      |
| 886 | 1,2,3,6,7,2<br>6,29,32 | 4,5,8,25,2<br>7,28,30,31 | 2 | O54800;Q5DWV2,P01835                                    |

|     |                        |                          |   |                                                                |
|-----|------------------------|--------------------------|---|----------------------------------------------------------------|
| 887 | 1,2,3,6,7,2<br>6,30,31 | 4,5,8,25,2<br>7,28,29,32 | 7 | O54800;Q5DWV2,P01835,P20766,P57113,Q6AYR9,Q812E4,Q99MH3        |
| 888 | 1,2,3,6,7,2<br>6,30,32 | 4,5,8,25,2<br>7,28,29,31 | 6 | O54800;Q5DWV2,P01835,P26342,P97615,Q99MH3,Q9R168               |
| 889 | 1,2,3,6,7,2<br>6,31,32 | 4,5,8,25,2<br>7,28,29,30 | 7 | O54800;Q5DWV2,O89117,P01835,P20766,P57113,Q62714,Q99MH3        |
| 890 | 1,2,3,6,7,2<br>7,28,29 | 4,5,8,25,2<br>6,30,31,32 | 8 | P00507,P01835,P09656,P0DMW0;P0DMW1,P47967,Q00715,Q6AY61,Q9WVK7 |
| 891 | 1,2,3,6,7,2<br>7,28,30 | 4,5,8,25,2<br>6,29,31,32 | 1 | P19218                                                         |
| 892 | 1,2,3,6,7,2<br>7,28,31 | 4,5,8,25,2<br>6,29,30,32 | 2 | P20766,Q62894                                                  |
| 893 | 1,2,3,6,7,2<br>7,28,32 | 4,5,8,25,2<br>6,29,30,31 | 3 | P05964,Q62761;Q62762;Q62763,Q6AY61                             |
| 894 | 1,2,3,6,7,2<br>7,29,30 | 4,5,8,25,2<br>6,28,31,32 | 2 | O54728,P01835                                                  |
| 895 | 1,2,3,6,7,2<br>7,29,31 | 4,5,8,25,2<br>6,28,30,32 | 4 | O54728,P01835,P20766,P80299                                    |
| 896 | 1,2,3,6,7,2<br>7,29,32 | 4,5,8,25,2<br>6,28,30,31 | 2 | P01835,Q6AY61                                                  |
| 897 | 1,2,3,6,7,2<br>7,30,31 | 4,5,8,25,2<br>6,28,29,32 | 2 | O54728,P20766                                                  |
| 898 | 1,2,3,6,7,2<br>7,30,32 | 4,5,8,25,2<br>6,28,29,31 | 2 | O54800;Q5DWV2,P06760                                           |
| 899 | 1,2,3,6,7,2<br>7,31,32 | 4,5,8,25,2<br>6,28,29,30 | 3 | P20766,P80299,Q62714                                           |
| 900 | 1,2,3,6,7,2<br>8,29,30 | 4,5,8,25,2<br>6,27,31,32 | 3 | P00762,P01835,P23739                                           |
| 901 | 1,2,3,6,7,2<br>8,29,31 | 4,5,8,25,2<br>6,27,30,32 | 3 | P00762,P01835,P21674                                           |
| 902 | 1,2,3,6,7,2<br>8,29,32 | 4,5,8,25,2<br>6,27,30,31 | 3 | P01835,P54921,Q6AY61                                           |
| 903 | 1,2,3,6,7,2<br>8,30,31 | 4,5,8,25,2<br>6,27,29,32 | 1 | P01835                                                         |
| 904 | 1,2,3,6,7,2<br>8,30,32 | 4,5,8,25,2<br>6,27,29,31 | 4 | O54800;Q5DWV2,P01835,P06760,Q62975                             |
| 905 | 1,2,3,6,7,2<br>8,31,32 | 4,5,8,25,2<br>6,27,29,30 | 3 | P01835,P20766,P22006                                           |
| 906 | 1,2,3,6,7,2<br>9,30,31 | 4,5,8,25,2<br>6,27,28,32 | 5 | O54728,P01835,P20766,P26342,Q9QWN8                             |

|     |                        |                          |   |                                                                       |
|-----|------------------------|--------------------------|---|-----------------------------------------------------------------------|
| 907 | 1,2,3,6,7,2<br>9,30,32 | 4,5,8,25,2<br>6,27,28,31 | 3 | O54800;Q5DWV2,P01835,P26342                                           |
| 908 | 1,2,3,6,7,2<br>9,31,32 | 4,5,8,25,2<br>6,27,28,30 | 5 | O54800;Q5DWV2,P01835,P20766,P26342,P80299                             |
| 909 | 1,2,3,6,7,3<br>0,31,32 | 4,5,8,25,2<br>6,27,28,29 | 9 | O54800;Q5DWV2,O89117,P01835,P06760,P20646,P20766,P26342,P97615,Q6P6R2 |
| 910 | 1,2,3,6,8,2<br>5,26,27 | 4,5,7,28,2<br>9,30,31,32 | 8 | O54800;Q5DWV2,P08649,P15399,P97580,Q06000,Q30KJ2,Q5BJY9,Q99MH3        |
| 911 | 1,2,3,6,8,2<br>5,26,28 | 4,5,7,27,2<br>9,30,31,32 | 6 | O54800;Q5DWV2,P00714,P08649,P97580,Q63598,Q99MH3                      |
| 912 | 1,2,3,6,8,2<br>5,26,29 | 4,5,7,27,2<br>8,30,31,32 | 3 | O54800;Q5DWV2,P08649,P97580                                           |
| 913 | 1,2,3,6,8,2<br>5,26,30 | 4,5,7,27,2<br>8,29,31,32 | 8 | O54800;Q5DWV2,P08649,P36374,P97580,Q06000,Q30KJ2,Q6IG05,Q99MH3        |
| 914 | 1,2,3,6,8,2<br>5,26,31 | 4,5,7,27,2<br>8,29,30,32 | 6 | O54800;Q5DWV2,P08649,P97580,P97840,Q63532,Q99MH3                      |
| 915 | 1,2,3,6,8,2<br>5,26,32 | 4,5,7,27,2<br>8,29,30,31 | 6 | O54800;Q5DWV2,P08649,P97580,Q06000,Q68G31,Q99MH3                      |
| 916 | 1,2,3,6,8,2<br>5,27,28 | 4,5,7,26,2<br>9,30,31,32 | 5 | P08649,P15399,P19629,P36860,P97580                                    |
| 917 | 1,2,3,6,8,2<br>5,27,29 | 4,5,7,26,2<br>8,30,31,32 | 1 | P97580                                                                |
| 918 | 1,2,3,6,8,2<br>5,27,30 | 4,5,7,26,2<br>8,29,31,32 | 6 | O54800;Q5DWV2,P15399,P97580,Q30KJ2,Q6IFU7,Q6IG05                      |
| 919 | 1,2,3,6,8,2<br>5,27,31 | 4,5,7,26,2<br>8,29,30,32 | 2 | P36376,P97580                                                         |
| 920 | 1,2,3,6,8,2<br>5,27,32 | 4,5,7,26,2<br>8,29,30,31 | 4 | O54800;Q5DWV2,P15399,P97580,P98166                                    |
| 921 | 1,2,3,6,8,2<br>5,28,29 | 4,5,7,26,2<br>7,30,31,32 | 0 |                                                                       |
| 922 | 1,2,3,6,8,2<br>5,28,30 | 4,5,7,26,2<br>7,29,31,32 | 2 | Q09030,Q6IG05                                                         |
| 923 | 1,2,3,6,8,2<br>5,28,31 | 4,5,7,26,2<br>7,29,30,32 | 4 | P36376,Q09030,Q5GRG2,Q63532                                           |
| 924 | 1,2,3,6,8,2<br>5,28,32 | 4,5,7,26,2<br>7,29,30,31 | 4 | O54800;Q5DWV2,P08649,Q09030,Q68G31                                    |
| 925 | 1,2,3,6,8,2<br>5,29,30 | 4,5,7,26,2<br>7,28,31,32 | 3 | O54800;Q5DWV2,Q6IFU7,Q6IG05                                           |
| 926 | 1,2,3,6,8,2<br>5,29,31 | 4,5,7,26,2<br>7,28,30,32 | 0 |                                                                       |

|     |                        |                          |   |                                                                       |
|-----|------------------------|--------------------------|---|-----------------------------------------------------------------------|
| 927 | 1,2,3,6,8,2<br>5,29,32 | 4,5,7,26,2<br>7,28,30,31 | 2 | O54800;Q5DWV2,Q68G31                                                  |
| 928 | 1,2,3,6,8,2<br>5,30,31 | 4,5,7,26,2<br>7,28,29,32 | 7 | O54800;Q5DWV2,P20646,P97840,Q09030,Q63532,Q6IG05,Q99MH3               |
| 929 | 1,2,3,6,8,2<br>5,30,32 | 4,5,7,26,2<br>7,28,29,31 | 9 | O54800;Q5DWV2,O88797,P02625,P20646,P97615,Q09030,Q68G31,Q6IG05,Q99MH3 |
| 930 | 1,2,3,6,8,2<br>5,31,32 | 4,5,7,26,2<br>7,28,29,30 | 7 | O54800;Q5DWV2,P20646,P21588,P97840,Q09030,Q63532,Q99MH3               |
| 931 | 1,2,3,6,8,2<br>6,27,28 | 4,5,7,25,2<br>9,30,31,32 | 6 | P08649,P15399,P97580,Q30KJ2,Q99MH3,Q9JI85                             |
| 932 | 1,2,3,6,8,2<br>6,27,29 | 4,5,7,25,2<br>8,30,31,32 | 5 | P02783,P09656,P15399,P97580,Q30KJ2                                    |
| 933 | 1,2,3,6,8,2<br>6,27,30 | 4,5,7,25,2<br>8,29,31,32 | 5 | P15399,P97580,Q30KJ2,Q6IG05,Q99MH3                                    |
| 934 | 1,2,3,6,8,2<br>6,27,31 | 4,5,7,25,2<br>8,29,30,32 | 5 | P15399,P97580,Q30KJ2,Q5BJY9,Q99MH3                                    |
| 935 | 1,2,3,6,8,2<br>6,27,32 | 4,5,7,25,2<br>8,29,30,31 | 5 | O54800;Q5DWV2,P15399,P97580,Q30KJ2,Q99MH3                             |
| 936 | 1,2,3,6,8,2<br>6,28,29 | 4,5,7,25,2<br>7,30,31,32 | 2 | P21674,Q9QYP1                                                         |
| 937 | 1,2,3,6,8,2<br>6,28,30 | 4,5,7,25,2<br>7,29,31,32 | 3 | O89117,P97580,Q99MH3                                                  |
| 938 | 1,2,3,6,8,2<br>6,28,31 | 4,5,7,25,2<br>7,29,30,32 | 4 | O89117,Q63532,Q63598,Q99MH3                                           |
| 939 | 1,2,3,6,8,2<br>6,28,32 | 4,5,7,25,2<br>7,29,30,31 | 5 | O54800;Q5DWV2,O89117,P08649,Q99MH3,Q9JI85                             |
| 940 | 1,2,3,6,8,2<br>6,29,30 | 4,5,7,25,2<br>7,28,31,32 | 3 | O54800;Q5DWV2,P97580,Q99MH3                                           |
| 941 | 1,2,3,6,8,2<br>6,29,31 | 4,5,7,25,2<br>7,28,30,32 | 1 | Q99MH3                                                                |
| 942 | 1,2,3,6,8,2<br>6,29,32 | 4,5,7,25,2<br>7,28,30,31 | 3 | O54800;Q5DWV2,Q68G31,Q99MH3                                           |
| 943 | 1,2,3,6,8,2<br>6,30,31 | 4,5,7,25,2<br>7,28,29,32 | 6 | O54800;Q5DWV2,O89117,P97580,Q63532,Q6IG05,Q99MH3                      |
| 944 | 1,2,3,6,8,2<br>6,30,32 | 4,5,7,25,2<br>7,28,29,31 | 6 | O54800;Q5DWV2,O89117,P97580,P97615,Q68G31,Q99MH3                      |
| 945 | 1,2,3,6,8,2<br>6,31,32 | 4,5,7,25,2<br>7,28,29,30 | 4 | O54800;Q5DWV2,O89117,Q63532,Q99MH3                                    |
| 946 | 1,2,3,6,8,2<br>7,28,29 | 4,5,7,25,2<br>6,30,31,32 | 5 | P09656,P15399,P97580,Q9JI85,Q9WVK7                                    |

|     |                         |                          |   |                                                                       |
|-----|-------------------------|--------------------------|---|-----------------------------------------------------------------------|
| 947 | 1,2,3,6,8,2<br>7,28,30  | 4,5,7,25,2<br>6,29,31,32 | 7 | P15399,P19218,P97580,Q30KJ2,Q6IFU7,Q6IG05,Q6P6S4                      |
| 948 | 1,2,3,6,8,2<br>7,28,31  | 4,5,7,25,2<br>6,29,30,32 | 4 | P15399,P36376,P97580,Q63532                                           |
| 949 | 1,2,3,6,8,2<br>7,28,32  | 4,5,7,25,2<br>6,29,30,31 | 4 | P15399,P97580,Q6P6S4,Q9JI85                                           |
| 950 | 1,2,3,6,8,2<br>7,29,30  | 4,5,7,25,2<br>6,28,31,32 | 5 | P00731,P97580,Q30KJ2,Q6IFU7,Q6IG05                                    |
| 951 | 1,2,3,6,8,2<br>7,29,31  | 4,5,7,25,2<br>6,28,30,32 | 1 | P97580                                                                |
| 952 | 1,2,3,6,8,2<br>7,29,32  | 4,5,7,25,2<br>6,28,30,31 | 2 | P97580,P98166                                                         |
| 953 | 1,2,3,6,8,2<br>7,30,31  | 4,5,7,25,2<br>6,28,29,32 | 3 | P20646,P97580,Q6IG05                                                  |
| 954 | 1,2,3,6,8,2<br>7,30,32  | 4,5,7,25,2<br>6,28,29,31 | 6 | P15399,P20646,P97580,Q68G31,Q6IFU7,Q6IG05                             |
| 955 | 1,2,3,6,8,2<br>7,31,32  | 4,5,7,25,2<br>6,28,29,30 | 3 | P20646,P97580,Q63532                                                  |
| 956 | 1,2,3,6,8,2<br>8,29,30  | 4,5,7,25,2<br>6,27,31,32 | 1 | Q6IFU7                                                                |
| 957 | 1,2,3,6,8,2<br>8,29,31  | 4,5,7,25,2<br>6,27,30,32 | 1 | P21674                                                                |
| 958 | 1,2,3,6,8,2<br>8,29,32  | 4,5,7,25,2<br>6,27,30,31 | 1 | Q9JI85                                                                |
| 959 | 1,2,3,6,8,2<br>8,30,31  | 4,5,7,25,2<br>6,27,29,32 | 5 | O89117,P36376,Q63532,Q6IG05,Q99MH3                                    |
| 960 | 1,2,3,6,8,2<br>8,30,32  | 4,5,7,25,2<br>6,27,29,31 | 4 | O89117,Q68G31,Q6P6S4,Q99MH3                                           |
| 961 | 1,2,3,6,8,2<br>8,31,32  | 4,5,7,25,2<br>6,27,29,30 | 2 | O89117,Q63532                                                         |
| 962 | 1,2,3,6,8,2<br>9,30,31  | 4,5,7,25,2<br>6,27,28,32 | 1 | Q6IG05                                                                |
| 963 | 1,2,3,6,8,2<br>9,30,32  | 4,5,7,25,2<br>6,27,28,31 | 5 | O54800;Q5DWV2,O88797,P20646,Q68G31,Q6IFU7                             |
| 964 | 1,2,3,6,8,2<br>9,31,32  | 4,5,7,25,2<br>6,27,28,30 | 0 |                                                                       |
| 965 | 1,2,3,6,8,3<br>0,31,32  | 4,5,7,25,2<br>6,27,28,29 | 9 | O54800;Q5DWV2,O89117,P06760,P20646,P26342,P97615,Q63532,Q6IG05,Q99MH3 |
| 966 | 1,2,3,6,25,<br>26,27,28 | 4,5,7,8,29,<br>30,31,32  | 3 | P0DMW0;P0DMW1,P63081,P82471                                           |

|     |                                              |                                                                                            |
|-----|----------------------------------------------|--------------------------------------------------------------------------------------------|
| 967 | 1,2,3,6,25, 4,5,7,8,28,<br>26,27,29 30,31,32 | 3 O54800;Q5DWV2,P09656,P82471                                                              |
| 968 | 1,2,3,6,25, 4,5,7,8,28,<br>26,27,30 29,31,32 | 5 O54800;Q5DWV2,P06760,P82471,Q06000,Q99MH3                                                |
| 969 | 1,2,3,6,25, 4,5,7,8,28,<br>26,27,31 29,30,32 | 1 O54800;Q5DWV2                                                                            |
| 970 | 1,2,3,6,25, 4,5,7,8,28,<br>26,27,32 29,30,31 | 5 O54800;Q5DWV2,P06760,P82471,Q06000,Q99MH3                                                |
| 971 | 1,2,3,6,25, 4,5,7,8,27,<br>26,28,29 30,31,32 | 2 P00714,P82471                                                                            |
| 972 | 1,2,3,6,25, 4,5,7,8,27,<br>26,28,30 29,31,32 | 9 O54800;Q5DWV2,P00714,P06760,P82471,Q06000,Q4G075,Q62975,Q6TMA8,Q99MH3                    |
| 973 | 1,2,3,6,25, 4,5,7,8,27,<br>26,28,31 29,30,32 | 5 P00714,P06760,Q4G075,Q63598,Q99MH3                                                       |
| 974 | 1,2,3,6,25, 4,5,7,8,27,<br>26,28,32 29,30,31 | 8 O54800;Q5DWV2,P06760,P82471,Q06000,Q4G075,Q62975,Q68G31,Q99MH3                           |
| 975 | 1,2,3,6,25, 4,5,7,8,27,<br>26,29,30 28,31,32 | 4 O54800;Q5DWV2,P22282,P82471,Q99MH3                                                       |
| 976 | 1,2,3,6,25, 4,5,7,8,27,<br>26,29,31 28,30,32 | 2 O54800;Q5DWV2,P22282                                                                     |
| 977 | 1,2,3,6,25, 4,5,7,8,27,<br>26,29,32 28,30,31 | 3 O54800;Q5DWV2,P82471,Q68G31                                                              |
| 978 | 1,2,3,6,25, 4,5,7,8,27,<br>26,30,31 28,29,32 | 11 O54800;Q5DWV2,P06760,P18298,P22273,P22282,Q4G075,Q6AYR9,Q6P777,Q812E4,Q99MH3,<br>Q9Z2L0 |
| 979 | 1,2,3,6,25, 4,5,7,8,27,<br>26,30,32 28,29,31 | 10 D3ZUC6,O54800;Q5DWV2,P06760,P22273,P82471,Q06000,Q4G075,Q68G31,Q99MH3,Q9QX7<br>4        |
| 980 | 1,2,3,6,25, 4,5,7,8,27,<br>26,31,32 28,29,30 | 5 O54800;Q5DWV2,P06760,P22273,Q4G075,Q99MH3                                                |
| 981 | 1,2,3,6,25, 4,5,7,8,26,<br>27,28,29 30,31,32 | 3 P09656,P0DMW0;P0DMW1,P82471                                                              |
| 982 | 1,2,3,6,25, 4,5,7,8,26,<br>27,28,30 29,31,32 | 3 P06760,P82471,Q9QX74                                                                     |
| 983 | 1,2,3,6,25, 4,5,7,8,26,<br>27,28,31 29,30,32 | 1 P06760                                                                                   |
| 984 | 1,2,3,6,25, 4,5,7,8,26,<br>27,28,32 29,30,31 | 4 P06760,P82471,Q5RJR2,Q9QX74                                                              |
| 985 | 1,2,3,6,25, 4,5,7,8,26,<br>27,29,30 28,31,32 | 2 O54728,P82471                                                                            |
| 986 | 1,2,3,6,25, 4,5,7,8,26,<br>27,29,31 28,30,32 | 1 O54728                                                                                   |

|      |                                              |                                                                                                                        |
|------|----------------------------------------------|------------------------------------------------------------------------------------------------------------------------|
| 987  | 1,2,3,6,25, 4,5,7,8,26,<br>27,29,32 28,30,31 | 2 O54800;Q5DWV2,P82471                                                                                                 |
| 988  | 1,2,3,6,25, 4,5,7,8,26,<br>27,30,31 28,29,32 | 3 O54728,P06760,Q9QX74                                                                                                 |
| 989  | 1,2,3,6,25, 4,5,7,8,26,<br>27,30,32 28,29,31 | 8 O54800;Q5DWV2,P06760,P20646,P82471,Q68G31,Q6P6R2,Q9QX74,Q9WTT6                                                       |
| 990  | 1,2,3,6,25, 4,5,7,8,26,<br>27,31,32 28,29,30 | 4 P06760,P20646,Q9QX74,Q9WTT6                                                                                          |
| 991  | 1,2,3,6,25, 4,5,7,8,26,<br>28,29,30 27,31,32 | 1 P82471                                                                                                               |
| 992  | 1,2,3,6,25, 4,5,7,8,26,<br>28,29,31 27,30,32 | 0                                                                                                                      |
| 993  | 1,2,3,6,25, 4,5,7,8,26,<br>28,29,32 27,30,31 | 2 P82471,Q68G31                                                                                                        |
| 994  | 1,2,3,6,25, 4,5,7,8,26,<br>28,30,31 27,29,32 | 3 P06760,Q4G075,Q9QX74                                                                                                 |
| 995  | 1,2,3,6,25, 4,5,7,8,26,<br>28,30,32 27,29,31 | 8 O54800;Q5DWV2,P06760,P82471,Q4G075,Q62975,Q68G31,Q9QX74,Q9WTT6                                                       |
| 996  | 1,2,3,6,25, 4,5,7,8,26,<br>28,31,32 27,29,30 | 5 P06760,Q4G075,Q62975,Q9QX74,Q9WTT6                                                                                   |
| 997  | 1,2,3,6,25, 4,5,7,8,26,<br>29,30,31 27,28,32 | 6 O54728,O54800;Q5DWV2,P07150,P22282,Q9QWN8,Q9WTT6                                                                     |
| 998  | 1,2,3,6,25, 4,5,7,8,26,<br>29,30,32 27,28,31 | 7 O54800;Q5DWV2,P07150,P82471,Q4G075,Q68G31,Q9QX74,Q9WTT6                                                              |
| 999  | 1,2,3,6,25, 4,5,7,8,26,<br>29,31,32 27,28,30 | 4 O54800;Q5DWV2,P07150,Q4G075,Q9WTT6                                                                                   |
| 1000 | 1,2,3,6,25, 4,5,7,8,26,<br>30,31,32 27,28,29 | 15 D3ZUC6,O54800;Q5DWV2,P06760,P07150,P20646,P22273,P22282,P26342,P47967,P97840,Q4<br>G075,Q6P6R2,Q99MH3,Q9QX74,Q9WTT6 |
| 1001 | 1,2,3,6,26, 4,5,7,8,25,<br>27,28,29 30,31,32 | 4 P09656,P0DMW0;P0DMW1,P82471,Q9WVK7                                                                                   |
| 1002 | 1,2,3,6,26, 4,5,7,8,25,<br>27,28,30 29,31,32 | 4 P06760,P21588,P82471,Q99MH3                                                                                          |
| 1003 | 1,2,3,6,26, 4,5,7,8,25,<br>27,28,31 29,30,32 | 0                                                                                                                      |
| 1004 | 1,2,3,6,26, 4,5,7,8,25,<br>27,28,32 29,30,31 | 2 P06760,P82471                                                                                                        |
| 1005 | 1,2,3,6,26, 4,5,7,8,25,<br>27,29,30 28,31,32 | 4 P09656,P21588,P82471,Q811M5                                                                                          |
| 1006 | 1,2,3,6,26, 4,5,7,8,25,<br>27,29,31 28,30,32 | 0                                                                                                                      |

|      |                                              |                                                                                                      |
|------|----------------------------------------------|------------------------------------------------------------------------------------------------------|
| 1007 | 1,2,3,6,26, 4,5,7,8,25,<br>27,29,32 28,30,31 | 2 P09656,P82471                                                                                      |
| 1008 | 1,2,3,6,26, 4,5,7,8,25,<br>27,30,31 28,29,32 | 2 P06760,Q99MH3                                                                                      |
| 1009 | 1,2,3,6,26, 4,5,7,8,25,<br>27,30,32 28,29,31 | 6 O54800;Q5DWV2,P06760,P82471,Q68G31,Q99MH3,Q9QX74                                                   |
| 1010 | 1,2,3,6,26, 4,5,7,8,25,<br>27,31,32 28,29,30 | 2 P06760,Q99MH3                                                                                      |
| 1011 | 1,2,3,6,26, 4,5,7,8,25,<br>28,29,30 27,31,32 | 3 P01835,P23739,P82471                                                                               |
| 1012 | 1,2,3,6,26, 4,5,7,8,25,<br>28,29,31 27,30,32 | 2 P01835,Q01205                                                                                      |
| 1013 | 1,2,3,6,26, 4,5,7,8,25,<br>28,29,32 27,30,31 | 2 P01835,P82471                                                                                      |
| 1014 | 1,2,3,6,26, 4,5,7,8,25,<br>28,30,31 27,29,32 | 5 O89117,P06760,Q4G075,Q6TMA8,Q99MH3                                                                 |
| 1015 | 1,2,3,6,26, 4,5,7,8,25,<br>28,30,32 27,29,31 | 8 O54800;Q5DWV2,O89117,P06760,P82471,Q4G075,Q68G31,Q99MH3,Q9QX74                                     |
| 1016 | 1,2,3,6,26, 4,5,7,8,25,<br>28,31,32 27,29,30 | 5 O89117,P06760,P22006,Q4G075,Q99MH3                                                                 |
| 1017 | 1,2,3,6,26, 4,5,7,8,25,<br>29,30,31 27,28,32 | 5 P01835,P0C0A9,P22282,Q4G075,Q99MH3                                                                 |
| 1018 | 1,2,3,6,26, 4,5,7,8,25,<br>29,30,32 27,28,31 | 6 O54800;Q5DWV2,P01835,P82471,Q4G075,Q68G31,Q99MH3                                                   |
| 1019 | 1,2,3,6,26, 4,5,7,8,25,<br>29,31,32 27,28,30 | 4 O54800;Q5DWV2,P01835,Q4G075,Q99MH3                                                                 |
| 1020 | 1,2,3,6,26, 4,5,7,8,25,<br>30,31,32 27,28,29 | 13 O54800;Q5DWV2,O89117,P06760,P20646,P22273,P22282,P26342,P97615,Q4G075,Q812E4,Q99MH3,Q9QX74,Q9WTT6 |
| 1021 | 1,2,3,6,27, 4,5,7,8,25,<br>28,29,30 26,31,32 | 4 P09656,P14562,P82471,Q9WVK7                                                                        |
| 1022 | 1,2,3,6,27, 4,5,7,8,25,<br>28,29,31 26,30,32 | 1 Q9WVK7                                                                                             |
| 1023 | 1,2,3,6,27, 4,5,7,8,25,<br>28,29,32 26,30,31 | 5 P09656,P14562,P82471,Q62761;Q62762;Q62763,Q6AY61                                                   |
| 1024 | 1,2,3,6,27, 4,5,7,8,25,<br>28,30,31 26,29,32 | 2 P06760,Q9QX74                                                                                      |
| 1025 | 1,2,3,6,27, 4,5,7,8,25,<br>28,30,32 26,29,31 | 5 P06760,P82471,Q68G31,Q9QX74,Q9Z0V6                                                                 |
| 1026 | 1,2,3,6,27, 4,5,7,8,25,<br>28,31,32 26,29,30 | 3 P06760,P22006,Q9QX74                                                                               |



|      |                                              |                                                           |
|------|----------------------------------------------|-----------------------------------------------------------|
| 1027 | 1,2,3,6,27, 4,5,7,8,25,<br>29,30,31 26,28,32 | 1 O54728                                                  |
| 1028 | 1,2,3,6,27, 4,5,7,8,25,<br>29,30,32 26,28,31 | 5 P14562,P82471,Q68G31,Q9WTT6,Q9Z0V6                      |
| 1029 | 1,2,3,6,27, 4,5,7,8,25,<br>29,31,32 26,28,30 | 2 P80299,Q9WTT6                                           |
| 1030 | 1,2,3,6,27, 4,5,7,8,25,<br>30,31,32 26,28,29 | 5 P06760,P20646,Q6P6R2,Q9QX74,Q9WTT6                      |
| 1031 | 1,2,3,6,28, 4,5,7,8,25,<br>29,30,31 26,27,32 | 2 P01835,Q4G075                                           |
| 1032 | 1,2,3,6,28, 4,5,7,8,25,<br>29,30,32 26,27,31 | 7 P01835,P14562,Q4G075,Q68G31,Q9QX74,Q9WTT6,Q9Z0V6        |
| 1033 | 1,2,3,6,28, 4,5,7,8,25,<br>29,31,32 26,27,30 | 3 P01835,Q4G075,Q9WTT6                                    |
| 1034 | 1,2,3,6,28, 4,5,7,8,25,<br>30,31,32 26,27,29 | 7 O89117,P06760,P20646,P22006,Q4G075,Q9QX74,Q9WTT6        |
| 1035 | 1,2,3,6,29, 4,5,7,8,25,<br>30,31,32 26,27,28 | 8 P01835,P07150,P20646,P22273,P26342,P36860,Q4G075,Q9WTT6 |
| 1036 | 1,2,3,7,8,2 4,5,6,28,2<br>5,26,27 9,30,31,32 | 4 P22006,P36860,P97580,Q66H69                             |
| 1037 | 1,2,3,7,8,2 4,5,6,27,2<br>5,26,28 9,30,31,32 | 3 P00714,P36860,Q63598                                    |
| 1038 | 1,2,3,7,8,2 4,5,6,27,2<br>5,26,29 8,30,31,32 | 3 P22006,Q64093,Q8VD89                                    |
| 1039 | 1,2,3,7,8,2 4,5,6,27,2<br>5,26,30 8,29,31,32 | 1 P22006                                                  |
| 1040 | 1,2,3,7,8,2 4,5,6,27,2<br>5,26,31 8,29,30,32 | 2 P20766,Q63598                                           |
| 1041 | 1,2,3,7,8,2 4,5,6,27,2<br>5,26,32 8,29,30,31 | 0                                                         |
| 1042 | 1,2,3,7,8,2 4,5,6,26,2<br>5,27,28 9,30,31,32 | 2 P36860,Q66H69                                           |
| 1043 | 1,2,3,7,8,2 4,5,6,26,2<br>5,27,29 8,30,31,32 | 3 P22006,Q66H69,Q8VD89                                    |
| 1044 | 1,2,3,7,8,2 4,5,6,26,2<br>5,27,30 8,29,31,32 | 4 Q05511,Q66H69,Q6IFW6,Q6IG05                             |
| 1045 | 1,2,3,7,8,2 4,5,6,26,2<br>5,27,31 8,29,30,32 | 1 P20766                                                  |
| 1046 | 1,2,3,7,8,2 4,5,6,26,2<br>5,27,32 8,29,30,31 | 2 P01681,Q66H69                                           |

|      |                        |                          |                                                    |
|------|------------------------|--------------------------|----------------------------------------------------|
| 1047 | 1,2,3,7,8,2<br>5,28,29 | 4,5,6,26,2<br>7,30,31,32 | 5 P22006,P36860,P62804,Q64093,Q8VD89               |
| 1048 | 1,2,3,7,8,2<br>5,28,30 | 4,5,6,26,2<br>7,29,31,32 | 0                                                  |
| 1049 | 1,2,3,7,8,2<br>5,28,31 | 4,5,6,26,2<br>7,29,30,32 | 4 P20766,P36376,Q63598,Q811M5                      |
| 1050 | 1,2,3,7,8,2<br>5,28,32 | 4,5,6,26,2<br>7,29,30,31 | 2 P36860,Q811M5                                    |
| 1051 | 1,2,3,7,8,2<br>5,29,30 | 4,5,6,26,2<br>7,28,31,32 | 3 P22006,P62804,Q6IFW6                             |
| 1052 | 1,2,3,7,8,2<br>5,29,31 | 4,5,6,26,2<br>7,28,30,32 | 2 P20766,Q8VD89                                    |
| 1053 | 1,2,3,7,8,2<br>5,29,32 | 4,5,6,26,2<br>7,28,30,31 | 0                                                  |
| 1054 | 1,2,3,7,8,2<br>5,30,31 | 4,5,6,26,2<br>7,28,29,32 | 2 P20766,Q6IG05                                    |
| 1055 | 1,2,3,7,8,2<br>5,30,32 | 4,5,6,26,2<br>7,28,29,31 | 3 P01681,P35280,P97615                             |
| 1056 | 1,2,3,7,8,2<br>5,31,32 | 4,5,6,26,2<br>7,28,29,30 | 4 P01681,P20766,P21588,Q811M5                      |
| 1057 | 1,2,3,7,8,2<br>6,27,28 | 4,5,6,25,2<br>9,30,31,32 | 6 P25809,P36860,P47967,Q63598,Q66H69,Q9WTT6        |
| 1058 | 1,2,3,7,8,2<br>6,27,29 | 4,5,6,25,2<br>8,30,31,32 | 4 P22006,P25809,Q66H69,Q9WTT6                      |
| 1059 | 1,2,3,7,8,2<br>6,27,30 | 4,5,6,25,2<br>8,29,31,32 | 3 P97580,Q66H69,Q6IG05                             |
| 1060 | 1,2,3,7,8,2<br>6,27,31 | 4,5,6,25,2<br>8,29,30,32 | 2 P20766,Q66H69                                    |
| 1061 | 1,2,3,7,8,2<br>6,27,32 | 4,5,6,25,2<br>8,29,30,31 | 1 Q66H69                                           |
| 1062 | 1,2,3,7,8,2<br>6,28,29 | 4,5,6,25,2<br>7,30,31,32 | 7 P21674,P47967,P62804,Q63424,Q64093,Q6P6R2,Q9WTT6 |
| 1063 | 1,2,3,7,8,2<br>6,28,30 | 4,5,6,25,2<br>7,29,31,32 | 0                                                  |
| 1064 | 1,2,3,7,8,2<br>6,28,31 | 4,5,6,25,2<br>7,29,30,32 | 4 P20766,Q5RLM2,Q63598,Q811M5                      |
| 1065 | 1,2,3,7,8,2<br>6,28,32 | 4,5,6,25,2<br>7,29,30,31 | 0                                                  |
| 1066 | 1,2,3,7,8,2<br>6,29,30 | 4,5,6,25,2<br>7,28,31,32 | 1 P22006                                           |

|      |                        |                          |                                                           |
|------|------------------------|--------------------------|-----------------------------------------------------------|
| 1067 | 1,2,3,7,8,2<br>6,29,31 | 4,5,6,25,2<br>7,28,30,32 | 2 P20766,Q64093                                           |
| 1068 | 1,2,3,7,8,2<br>6,29,32 | 4,5,6,25,2<br>7,28,30,31 | 1 Q64093                                                  |
| 1069 | 1,2,3,7,8,2<br>6,30,31 | 4,5,6,25,2<br>7,28,29,32 | 2 P20766,Q99MH3                                           |
| 1070 | 1,2,3,7,8,2<br>6,30,32 | 4,5,6,25,2<br>7,28,29,31 | 3 P35280,P97615,Q99MH3                                    |
| 1071 | 1,2,3,7,8,2<br>6,31,32 | 4,5,6,25,2<br>7,28,29,30 | 1 P20766                                                  |
| 1072 | 1,2,3,7,8,2<br>7,28,29 | 4,5,6,25,2<br>6,30,31,32 | 8 P00507,P25809,P47967,P62804,Q00715,Q66H69,Q812E4,Q9WVK7 |
| 1073 | 1,2,3,7,8,2<br>7,28,30 | 4,5,6,25,2<br>6,29,31,32 | 3 P19218,Q66H69,Q6IG05                                    |
| 1074 | 1,2,3,7,8,2<br>7,28,31 | 4,5,6,25,2<br>6,29,30,32 | 1 P20766                                                  |
| 1075 | 1,2,3,7,8,2<br>7,28,32 | 4,5,6,25,2<br>6,29,30,31 | 1 Q66H69                                                  |
| 1076 | 1,2,3,7,8,2<br>7,29,30 | 4,5,6,25,2<br>6,28,31,32 | 6 P00731,P62804,Q66H69,Q6IFU7,Q6IFW6,Q6IG05               |
| 1077 | 1,2,3,7,8,2<br>7,29,31 | 4,5,6,25,2<br>6,28,30,32 | 2 P20766,Q66H69                                           |
| 1078 | 1,2,3,7,8,2<br>7,29,32 | 4,5,6,25,2<br>6,28,30,31 | 1 Q66H69                                                  |
| 1079 | 1,2,3,7,8,2<br>7,30,31 | 4,5,6,25,2<br>6,28,29,32 | 3 P00731,P20766,Q6IG05                                    |
| 1080 | 1,2,3,7,8,2<br>7,30,32 | 4,5,6,25,2<br>6,28,29,31 | 2 P35280,Q6IG05                                           |
| 1081 | 1,2,3,7,8,2<br>7,31,32 | 4,5,6,25,2<br>6,28,29,30 | 1 P20766                                                  |
| 1082 | 1,2,3,7,8,2<br>8,29,30 | 4,5,6,25,2<br>6,27,31,32 | 2 P21674,P62804                                           |
| 1083 | 1,2,3,7,8,2<br>8,29,31 | 4,5,6,25,2<br>6,27,30,32 | 3 P21674,Q64093,Q811M5                                    |
| 1084 | 1,2,3,7,8,2<br>8,29,32 | 4,5,6,25,2<br>6,27,30,31 | 3 P21674,P54921,Q812E4                                    |
| 1085 | 1,2,3,7,8,2<br>8,30,31 | 4,5,6,25,2<br>6,27,29,32 | 1 P20766                                                  |
| 1086 | 1,2,3,7,8,2<br>8,30,32 | 4,5,6,25,2<br>6,27,29,31 | 1 P35280                                                  |

|      |                         |                          |                                      |
|------|-------------------------|--------------------------|--------------------------------------|
| 1087 | 1,2,3,7,8,2<br>8,31,32  | 4,5,6,25,2<br>6,27,29,30 | 4 P20766,P21588,Q811M5,Q923V8        |
| 1088 | 1,2,3,7,8,2<br>9,30,31  | 4,5,6,25,2<br>6,27,28,32 | 2 P20766,Q9QWN8                      |
| 1089 | 1,2,3,7,8,2<br>9,30,32  | 4,5,6,25,2<br>6,27,28,31 | 1 P35280                             |
| 1090 | 1,2,3,7,8,2<br>9,31,32  | 4,5,6,25,2<br>6,27,28,30 | 2 P20766,P21588                      |
| 1091 | 1,2,3,7,8,3<br>0,31,32  | 4,5,6,25,2<br>6,27,28,29 | 5 O89117,P20766,P26342,P35280,P97615 |
| 1092 | 1,2,3,7,25,<br>26,27,28 | 4,5,6,8,29,<br>30,31,32  | 2 P0DMW0;P0DMW1,P36860               |
| 1093 | 1,2,3,7,25,<br>26,27,29 | 4,5,6,8,28,<br>30,31,32  | 2 P22006,Q8VD89                      |
| 1094 | 1,2,3,7,25,<br>26,27,30 | 4,5,6,8,28,<br>29,31,32  | 0                                    |
| 1095 | 1,2,3,7,25,<br>26,27,31 | 4,5,6,8,28,<br>29,30,32  | 1 P20766                             |
| 1096 | 1,2,3,7,25,<br>26,27,32 | 4,5,6,8,28,<br>29,30,31  | 0                                    |
| 1097 | 1,2,3,7,25,<br>26,28,29 | 4,5,6,8,27,<br>30,31,32  | 2 P00714,Q64093                      |
| 1098 | 1,2,3,7,25,<br>26,28,30 | 4,5,6,8,27,<br>29,31,32  | 2 P00714,Q62975                      |
| 1099 | 1,2,3,7,25,<br>26,28,31 | 4,5,6,8,27,<br>29,30,32  | 2 P00714,Q63598                      |
| 1100 | 1,2,3,7,25,<br>26,28,32 | 4,5,6,8,27,<br>29,30,31  | 1 Q62975                             |
| 1101 | 1,2,3,7,25,<br>26,29,30 | 4,5,6,8,27,<br>28,31,32  | 2 P22006,P22282                      |
| 1102 | 1,2,3,7,25,<br>26,29,31 | 4,5,6,8,27,<br>28,30,32  | 5 P19218,P20766,P22282,Q6RUV5,Q8VD89 |
| 1103 | 1,2,3,7,25,<br>26,29,32 | 4,5,6,8,27,<br>28,30,31  | 1 P19218                             |
| 1104 | 1,2,3,7,25,<br>26,30,31 | 4,5,6,8,27,<br>28,29,32  | 4 P20766,P22282,Q6AYR9,Q812E4        |
| 1105 | 1,2,3,7,25,<br>26,30,32 | 4,5,6,8,27,<br>28,29,31  | 2 Q62975,Q9R168                      |
| 1106 | 1,2,3,7,25,<br>26,31,32 | 4,5,6,8,27,<br>28,29,30  | 2 P19218,P20766                      |

|      |                                              |                                      |
|------|----------------------------------------------|--------------------------------------|
| 1107 | 1,2,3,7,25, 4,5,6,8,26,<br>27,28,29 30,31,32 | 2 P0DMW0;P0DMW1,Q6AY61               |
| 1108 | 1,2,3,7,25, 4,5,6,8,26,<br>27,28,30 29,31,32 | 0                                    |
| 1109 | 1,2,3,7,25, 4,5,6,8,26,<br>27,28,31 29,30,32 | 0                                    |
| 1110 | 1,2,3,7,25, 4,5,6,8,26,<br>27,28,32 29,30,31 | 3 Q5RJR2,Q62761;Q62762;Q62763,Q6AY61 |
| 1111 | 1,2,3,7,25, 4,5,6,8,26,<br>27,29,30 28,31,32 | 2 O54728,P22006                      |
| 1112 | 1,2,3,7,25, 4,5,6,8,26,<br>27,29,31 28,30,32 | 2 O54728,Q8VD89                      |
| 1113 | 1,2,3,7,25, 4,5,6,8,26,<br>27,29,32 28,30,31 | 1 Q6AY61                             |
| 1114 | 1,2,3,7,25, 4,5,6,8,26,<br>27,30,31 28,29,32 | 2 O54728,P20766                      |
| 1115 | 1,2,3,7,25, 4,5,6,8,26,<br>27,30,32 28,29,31 | 0                                    |
| 1116 | 1,2,3,7,25, 4,5,6,8,26,<br>27,31,32 28,29,30 | 1 P20766                             |
| 1117 | 1,2,3,7,25, 4,5,6,8,26,<br>28,29,30 27,31,32 | 0                                    |
| 1118 | 1,2,3,7,25, 4,5,6,8,26,<br>28,29,31 27,30,32 | 1 Q8VD89                             |
| 1119 | 1,2,3,7,25, 4,5,6,8,26,<br>28,29,32 27,30,31 | 2 P54921,Q6AY61                      |
| 1120 | 1,2,3,7,25, 4,5,6,8,26,<br>28,30,31 27,29,32 | 1 Q62975                             |
| 1121 | 1,2,3,7,25, 4,5,6,8,26,<br>28,30,32 27,29,31 | 2 Q62975,Q9R168                      |
| 1122 | 1,2,3,7,25, 4,5,6,8,26,<br>28,31,32 27,29,30 | 3 P21588,Q62975,Q811M5               |
| 1123 | 1,2,3,7,25, 4,5,6,8,26,<br>29,30,31 27,28,32 | 3 O54728,P22282,Q9QWN8               |
| 1124 | 1,2,3,7,25, 4,5,6,8,26,<br>29,30,32 27,28,31 | 1 Q9R168                             |
| 1125 | 1,2,3,7,25, 4,5,6,8,26,<br>29,31,32 27,28,30 | 1 P21588                             |
| 1126 | 1,2,3,7,25, 4,5,6,8,26,<br>30,31,32 27,28,29 | 5 P06760,P22273,P22282,P26342,Q6P6R2 |

|      |                                              |                               |
|------|----------------------------------------------|-------------------------------|
| 1127 | 1,2,3,7,26, 4,5,6,8,25,<br>27,28,29 30,31,32 | 3 P0DMW0;P0DMW1,P47967,Q9WVK7 |
| 1128 | 1,2,3,7,26, 4,5,6,8,25,<br>27,28,30 29,31,32 | 0                             |
| 1129 | 1,2,3,7,26, 4,5,6,8,25,<br>27,28,31 29,30,32 | 3 P0DMW0;P0DMW1,P20766,Q63598 |
| 1130 | 1,2,3,7,26, 4,5,6,8,25,<br>27,28,32 29,30,31 | 0                             |
| 1131 | 1,2,3,7,26, 4,5,6,8,25,<br>27,29,30 28,31,32 | 0                             |
| 1132 | 1,2,3,7,26, 4,5,6,8,25,<br>27,29,31 28,30,32 | 1 P20766                      |
| 1133 | 1,2,3,7,26, 4,5,6,8,25,<br>27,29,32 28,30,31 | 0                             |
| 1134 | 1,2,3,7,26, 4,5,6,8,25,<br>27,30,31 28,29,32 | 1 P20766                      |
| 1135 | 1,2,3,7,26, 4,5,6,8,25,<br>27,30,32 28,29,31 | 0                             |
| 1136 | 1,2,3,7,26, 4,5,6,8,25,<br>27,31,32 28,29,30 | 1 P20766                      |
| 1137 | 1,2,3,7,26, 4,5,6,8,25,<br>28,29,30 27,31,32 | 1 P01835                      |
| 1138 | 1,2,3,7,26, 4,5,6,8,25,<br>28,29,31 27,30,32 | 4 P01835,Q01205,Q63424,Q64093 |
| 1139 | 1,2,3,7,26, 4,5,6,8,25,<br>28,29,32 27,30,31 | 2 P01835,P54921               |
| 1140 | 1,2,3,7,26, 4,5,6,8,25,<br>28,30,31 27,29,32 | 0                             |
| 1141 | 1,2,3,7,26, 4,5,6,8,25,<br>28,30,32 27,29,31 | 1 Q9R168                      |
| 1142 | 1,2,3,7,26, 4,5,6,8,25,<br>28,31,32 27,29,30 | 0                             |
| 1143 | 1,2,3,7,26, 4,5,6,8,25,<br>29,30,31 27,28,32 | 3 P01835,P22282,Q9QWN8        |
| 1144 | 1,2,3,7,26, 4,5,6,8,25,<br>29,30,32 27,28,31 | 2 P01835,Q9R168               |
| 1145 | 1,2,3,7,26, 4,5,6,8,25,<br>29,31,32 27,28,30 | 2 P01835,P20766               |
| 1146 | 1,2,3,7,26, 4,5,6,8,25,<br>30,31,32 27,28,29 | 3 P20766,P22273,P26342        |

|      |                                              |                                                    |
|------|----------------------------------------------|----------------------------------------------------|
| 1147 | 1,2,3,7,27, 4,5,6,8,25,<br>28,29,30 26,31,32 | 2 P00507,P47967                                    |
| 1148 | 1,2,3,7,27, 4,5,6,8,25,<br>28,29,31 26,30,32 | 2 P00507,P0DMW0;P0DMW1                             |
| 1149 | 1,2,3,7,27, 4,5,6,8,25,<br>28,29,32 26,30,31 | 5 P47967,P54921,Q62761;Q62762;Q62763,Q6AY61,Q812E4 |
| 1150 | 1,2,3,7,27, 4,5,6,8,25,<br>28,30,31 26,29,32 | 0                                                  |
| 1151 | 1,2,3,7,27, 4,5,6,8,25,<br>28,30,32 26,29,31 | 0                                                  |
| 1152 | 1,2,3,7,27, 4,5,6,8,25,<br>28,31,32 26,29,30 | 2 P80299,Q6AY61                                    |
| 1153 | 1,2,3,7,27, 4,5,6,8,25,<br>29,30,31 26,28,32 | 1 O54728                                           |
| 1154 | 1,2,3,7,27, 4,5,6,8,25,<br>29,30,32 26,28,31 | 0                                                  |
| 1155 | 1,2,3,7,27, 4,5,6,8,25,<br>29,31,32 26,28,30 | 2 P80299,Q6AY61                                    |
| 1156 | 1,2,3,7,27, 4,5,6,8,25,<br>30,31,32 26,28,29 | 2 P20766,P80299                                    |
| 1157 | 1,2,3,7,28, 4,5,6,8,25,<br>29,30,31 26,27,32 | 1 P01835                                           |
| 1158 | 1,2,3,7,28, 4,5,6,8,25,<br>29,30,32 26,27,31 | 2 P01835,P54921                                    |
| 1159 | 1,2,3,7,28, 4,5,6,8,25,<br>29,31,32 26,27,30 | 4 P01835,P54921,P80299,Q6AY61                      |
| 1160 | 1,2,3,7,28, 4,5,6,8,25,<br>30,31,32 26,27,29 | 1 P06760                                           |
| 1161 | 1,2,3,7,29, 4,5,6,8,25,<br>30,31,32 26,27,28 | 3 P01835,P26342,P80299                             |
| 1162 | 1,2,3,8,25, 4,5,6,7,29,<br>26,27,28 30,31,32 | 4 P00714,P26342,P36860,Q5BJY9                      |
| 1163 | 1,2,3,8,25, 4,5,6,7,28,<br>26,27,29 30,31,32 | 2 P22006,Q9Z0J6                                    |
| 1164 | 1,2,3,8,25, 4,5,6,7,28,<br>26,27,30 29,31,32 | 3 P97580,Q30KJ2,Q6IG05                             |
| 1165 | 1,2,3,8,25, 4,5,6,7,28,<br>26,27,31 29,30,32 | 1 Q5BJY9                                           |
| 1166 | 1,2,3,8,25, 4,5,6,7,28,<br>26,27,32 29,30,31 | 0                                                  |

|      |                                              |                                             |
|------|----------------------------------------------|---------------------------------------------|
| 1167 | 1,2,3,8,25, 4,5,6,7,27,<br>26,28,29 30,31,32 | 3 P00714,P22006,Q9Z0J6                      |
| 1168 | 1,2,3,8,25, 4,5,6,7,27,<br>26,28,30 29,31,32 | 2 P00714,P80299                             |
| 1169 | 1,2,3,8,25, 4,5,6,7,27,<br>26,28,31 29,30,32 | 3 P00714,P36376,Q63598                      |
| 1170 | 1,2,3,8,25, 4,5,6,7,27,<br>26,28,32 29,30,31 | 0                                           |
| 1171 | 1,2,3,8,25, 4,5,6,7,27,<br>26,29,30 28,31,32 | 3 P22006,P50116,Q9Z0J6                      |
| 1172 | 1,2,3,8,25, 4,5,6,7,27,<br>26,29,31 28,30,32 | 3 P00714,Q8VD89,Q9Z0J6                      |
| 1173 | 1,2,3,8,25, 4,5,6,7,27,<br>26,29,32 28,30,31 | 1 Q9Z0J6                                    |
| 1174 | 1,2,3,8,25, 4,5,6,7,27,<br>26,30,31 28,29,32 | 6 P00714,P11598,P22283,P50116,Q63617,Q99MH3 |
| 1175 | 1,2,3,8,25, 4,5,6,7,27,<br>26,30,32 28,29,31 | 5 O88797,P50116,Q63617,Q68G31,Q99MH3        |
| 1176 | 1,2,3,8,25, 4,5,6,7,27,<br>26,31,32 28,29,30 | 3 P21588,Q63617,Q99MH3                      |
| 1177 | 1,2,3,8,25, 4,5,6,7,26,<br>27,28,29 30,31,32 | 2 P36860,Q9Z0J6                             |
| 1178 | 1,2,3,8,25, 4,5,6,7,26,<br>27,28,30 29,31,32 | 3 P36860,Q6IFU7,Q6IG05                      |
| 1179 | 1,2,3,8,25, 4,5,6,7,26,<br>27,28,31 29,30,32 | 2 P36376,P36860                             |
| 1180 | 1,2,3,8,25, 4,5,6,7,26,<br>27,28,32 29,30,31 | 2 P36860,Q9QWN8                             |
| 1181 | 1,2,3,8,25, 4,5,6,7,26,<br>27,29,30 28,31,32 | 6 P22006,Q6IFU7,Q6IFW6,Q6IG02,Q6IG05,Q9Z0J6 |
| 1182 | 1,2,3,8,25, 4,5,6,7,26,<br>27,29,31 28,30,32 | 0                                           |
| 1183 | 1,2,3,8,25, 4,5,6,7,26,<br>27,29,32 28,30,31 | 1 Q9Z0J6                                    |
| 1184 | 1,2,3,8,25, 4,5,6,7,26,<br>27,30,31 28,29,32 | 3 Q63617,Q6IFW6,Q6IG05                      |
| 1185 | 1,2,3,8,25, 4,5,6,7,26,<br>27,30,32 28,29,31 | 4 P01681,Q68G31,Q6IFU7,Q6IG05               |
| 1186 | 1,2,3,8,25, 4,5,6,7,26,<br>27,31,32 28,29,30 | 2 P01681,P21588                             |



|      |                                              |                                                    |
|------|----------------------------------------------|----------------------------------------------------|
| 1187 | 1,2,3,8,25, 4,5,6,7,26,<br>28,29,30 27,31,32 | 3 P50116,Q6IFU7,Q9Z0J6                             |
| 1188 | 1,2,3,8,25, 4,5,6,7,26,<br>28,29,31 27,30,32 | 4 P00714,P36376,P50116,Q9Z0J6                      |
| 1189 | 1,2,3,8,25, 4,5,6,7,26,<br>28,29,32 27,30,31 | 2 P50116,Q9Z0J6                                    |
| 1190 | 1,2,3,8,25, 4,5,6,7,26,<br>28,30,31 27,29,32 | 3 P00714,P36376,P50116                             |
| 1191 | 1,2,3,8,25, 4,5,6,7,26,<br>28,30,32 27,29,31 | 2 P50116,Q68G31                                    |
| 1192 | 1,2,3,8,25, 4,5,6,7,26,<br>28,31,32 27,29,30 | 7 P01681,P21588,P36376,P50116,Q80WL1,Q811M5,Q923V8 |
| 1193 | 1,2,3,8,25, 4,5,6,7,26,<br>29,30,31 27,28,32 | 4 P11598,P50116,Q6IFW6,Q9Z0J6                      |
| 1194 | 1,2,3,8,25, 4,5,6,7,26,<br>29,30,32 27,28,31 | 4 O88797,P50116,Q68G31,Q9Z0J6                      |
| 1195 | 1,2,3,8,25, 4,5,6,7,26,<br>29,31,32 27,28,30 | 3 P21588,P50116,Q9Z0J6                             |
| 1196 | 1,2,3,8,25, 4,5,6,7,26,<br>30,31,32 27,28,29 | 7 P01681,P02625,P11598,P20646,P21588,P50116,Q63617 |
| 1197 | 1,2,3,8,26, 4,5,6,7,25,<br>27,28,29 30,31,32 | 3 P25809,Q6P6R2,Q9WVK7                             |
| 1198 | 1,2,3,8,26, 4,5,6,7,25,<br>27,28,30 29,31,32 | 2 P15399,P97580                                    |
| 1199 | 1,2,3,8,26, 4,5,6,7,25,<br>27,28,31 29,30,32 | 1 Q5BJY9                                           |
| 1200 | 1,2,3,8,26, 4,5,6,7,25,<br>27,28,32 29,30,31 | 2 P15399,Q9QWN8                                    |
| 1201 | 1,2,3,8,26, 4,5,6,7,25,<br>27,29,30 28,31,32 | 2 P97580,Q6IFU7                                    |
| 1202 | 1,2,3,8,26, 4,5,6,7,25,<br>27,29,31 28,30,32 | 0                                                  |
| 1203 | 1,2,3,8,26, 4,5,6,7,25,<br>27,29,32 28,30,31 | 0                                                  |
| 1204 | 1,2,3,8,26, 4,5,6,7,25,<br>27,30,31 28,29,32 | 2 P97580,Q6IG05                                    |
| 1205 | 1,2,3,8,26, 4,5,6,7,25,<br>27,30,32 28,29,31 | 1 P97580                                           |
| 1206 | 1,2,3,8,26, 4,5,6,7,25,<br>27,31,32 28,29,30 | 0                                                  |

|      |                                              |                                      |
|------|----------------------------------------------|--------------------------------------|
| 1207 | 1,2,3,8,26, 4,5,6,7,25,<br>28,29,30 27,31,32 | 1 P50116                             |
| 1208 | 1,2,3,8,26, 4,5,6,7,25,<br>28,29,31 27,30,32 | 2 P00714,Q99376                      |
| 1209 | 1,2,3,8,26, 4,5,6,7,25,<br>28,29,32 27,30,31 | 0                                    |
| 1210 | 1,2,3,8,26, 4,5,6,7,25,<br>28,30,31 27,29,32 | 3 P00714,P50116,Q99MH3               |
| 1211 | 1,2,3,8,26, 4,5,6,7,25,<br>28,30,32 27,29,31 | 4 O89117,P50116,Q68G31,Q99MH3        |
| 1212 | 1,2,3,8,26, 4,5,6,7,25,<br>28,31,32 27,29,30 | 1 O89117                             |
| 1213 | 1,2,3,8,26, 4,5,6,7,25,<br>29,30,31 27,28,32 | 1 P50116                             |
| 1214 | 1,2,3,8,26, 4,5,6,7,25,<br>29,30,32 27,28,31 | 3 O88797,P50116,Q68G31               |
| 1215 | 1,2,3,8,26, 4,5,6,7,25,<br>29,31,32 27,28,30 | 1 P50116                             |
| 1216 | 1,2,3,8,26, 4,5,6,7,25,<br>30,31,32 27,28,29 | 5 O89117,P50116,P97615,Q63617,Q99MH3 |
| 1217 | 1,2,3,8,27, 4,5,6,7,25,<br>28,29,30 26,31,32 | 2 Q6IFU7,Q9WVK7                      |
| 1218 | 1,2,3,8,27, 4,5,6,7,25,<br>28,29,31 26,30,32 | 1 Q9WVK7                             |
| 1219 | 1,2,3,8,27, 4,5,6,7,25,<br>28,29,32 26,30,31 | 4 P25809,Q6AYR9,Q812E4,Q9WVK7        |
| 1220 | 1,2,3,8,27, 4,5,6,7,25,<br>28,30,31 26,29,32 | 1 Q6IG05                             |
| 1221 | 1,2,3,8,27, 4,5,6,7,25,<br>28,30,32 26,29,31 | 1 Q6IFU7                             |
| 1222 | 1,2,3,8,27, 4,5,6,7,25,<br>28,31,32 26,29,30 | 0                                    |
| 1223 | 1,2,3,8,27, 4,5,6,7,25,<br>29,30,31 26,28,32 | 5 P00731,Q6IFU7,Q6IFW6,Q6IG02,Q6IG05 |
| 1224 | 1,2,3,8,27, 4,5,6,7,25,<br>29,30,32 26,28,31 | 1 Q6IFU7                             |
| 1225 | 1,2,3,8,27, 4,5,6,7,25,<br>29,31,32 26,28,30 | 0                                    |
| 1226 | 1,2,3,8,27, 4,5,6,7,25,<br>30,31,32 26,28,29 | 2 P20646,Q6IG05                      |

|      |                                              |                                                                                 |
|------|----------------------------------------------|---------------------------------------------------------------------------------|
| 1227 | 1,2,3,8,28, 4,5,6,7,25,<br>29,30,31 26,27,32 | 1 P50116                                                                        |
| 1228 | 1,2,3,8,28, 4,5,6,7,25,<br>29,30,32 26,27,31 | 2 P50116,Q68G31                                                                 |
| 1229 | 1,2,3,8,28, 4,5,6,7,25,<br>29,31,32 26,27,30 | 2 P21588,P50116                                                                 |
| 1230 | 1,2,3,8,28, 4,5,6,7,25,<br>30,31,32 26,27,29 | 2 O89117,P50116                                                                 |
| 1231 | 1,2,3,8,29, 4,5,6,7,25,<br>30,31,32 26,27,28 | 2 P50116,P63081                                                                 |
| 1232 | 1,2,3,25,2 4,5,6,7,8,3<br>6,27,28,29 0,31,32 | 5 P00714,P0DMW0;P0DMW1,P82471,Q99041,Q9Z0J6                                     |
| 1233 | 1,2,3,25,2 4,5,6,7,8,2<br>6,27,28,30 9,31,32 | 3 P00714,P82471,Q99041                                                          |
| 1234 | 1,2,3,25,2 4,5,6,7,8,2<br>6,27,28,31 9,30,32 | 3 P00714,P22273,Q99041                                                          |
| 1235 | 1,2,3,25,2 4,5,6,7,8,2<br>6,27,28,32 9,30,31 | 3 P82471,Q5RJR2,Q99041                                                          |
| 1236 | 1,2,3,25,2 4,5,6,7,8,2<br>6,27,29,30 8,31,32 | 9 P07171,P11598,P22006,P22273,P22282,P82471,Q63617,Q99041,Q9Z0J6                |
| 1237 | 1,2,3,25,2 4,5,6,7,8,2<br>6,27,29,31 8,30,32 | 5 P07171,P22273,P22282,Q63617,Q99041                                            |
| 1238 | 1,2,3,25,2 4,5,6,7,8,2<br>6,27,29,32 8,30,31 | 5 P07171,P22273,P82471,Q99041,Q9Z0J6                                            |
| 1239 | 1,2,3,25,2 4,5,6,7,8,2<br>6,27,30,31 8,29,32 | 9 P00714,P02780,P06760,P06761,P11598,P22273,P22282,Q63617,Q99041                |
| 1240 | 1,2,3,25,2 4,5,6,7,8,2<br>6,27,30,32 8,29,31 | 9 D3ZUC6,P06760,P06761,P07171,P21674,P22273,P82471,Q63617,Q99041                |
| 1241 | 1,2,3,25,2 4,5,6,7,8,2<br>6,27,31,32 8,29,30 | 6 P06760,P07171,P19218,P22273,Q63617,Q99041                                     |
| 1242 | 1,2,3,25,2 4,5,6,7,8,2<br>6,28,29,30 7,31,32 | 8 P00714,P22273,P22282,P50115,P50116,P82471,Q99041,Q9Z0J6                       |
| 1243 | 1,2,3,25,2 4,5,6,7,8,2<br>6,28,29,31 7,30,32 | 8 P00714,P19218,P22273,P22282,P50116,Q01205,Q99041,Q9Z0J6                       |
| 1244 | 1,2,3,25,2 4,5,6,7,8,2<br>6,28,29,32 7,30,31 | 7 P19218,P22273,P50115,P50116,P82471,Q99041,Q9Z0J6                              |
| 1245 | 1,2,3,25,2 4,5,6,7,8,2<br>6,28,30,31 7,29,32 | 9 P00714,P06760,P22273,P22282,P50115,P50116,Q4G075,Q6TMA8,Q99041                |
| 1246 | 1,2,3,25,2 4,5,6,7,8,2<br>6,28,30,32 7,29,31 | 11 P06760,P22273,P22282,P50115,P50116,P82471,Q4G075,Q62975,Q68G31,Q99041,Q9QX74 |

|      |                          |                        |    |                                                                                                          |
|------|--------------------------|------------------------|----|----------------------------------------------------------------------------------------------------------|
| 1247 | 1,2,3,25,2<br>6,28,31,32 | 4,5,6,7,8,2<br>7,29,30 | 8  | P06760,P19218,P22273,P22282,P50115,P50116,Q4G075,Q99041                                                  |
| 1248 | 1,2,3,25,2<br>6,29,30,31 | 4,5,6,7,8,2<br>7,28,32 | 11 | P00714,P06761,P11598,P22273,P22282,P50115,P50116,Q63617,Q6RUV5,Q99041,Q9Z0J6                             |
| 1249 | 1,2,3,25,2<br>6,29,30,32 | 4,5,6,7,8,2<br>7,28,31 | 13 | D3ZUC6,P06761,P11598,P22273,P22282,P50115,P50116,P82471,Q4G075,Q63617,Q68G31,Q99041,Q9Z0J6               |
| 1250 | 1,2,3,25,2<br>6,29,31,32 | 4,5,6,7,8,2<br>7,28,30 | 10 | P06761,P19218,P22273,P22282,P50115,P50116,Q4G075,Q63617,Q99041,Q9Z0J6                                    |
| 1251 | 1,2,3,25,2<br>6,30,31,32 | 4,5,6,7,8,2<br>7,28,29 | 15 | D3ZUC6,P04636,P06760,P06761,P11598,P22273,P22282,P22283,P50115,P50116,Q4G075,Q63617,Q812E4,Q99041,Q99MH3 |
| 1252 | 1,2,3,25,2<br>7,28,29,30 | 4,5,6,7,8,2<br>6,31,32 | 3  | P82471,Q99041,Q9Z0J6                                                                                     |
| 1253 | 1,2,3,25,2<br>7,28,29,31 | 4,5,6,7,8,2<br>6,30,32 | 1  | Q99041                                                                                                   |
| 1254 | 1,2,3,25,2<br>7,28,29,32 | 4,5,6,7,8,2<br>6,30,31 | 7  | P49134,P82471,Q5RJR2,Q62761;Q62762;Q62763,Q6AY61,Q99041,Q9Z0J6                                           |
| 1255 | 1,2,3,25,2<br>7,28,30,31 | 4,5,6,7,8,2<br>6,29,32 | 5  | P00714,P06760,P22273,Q99041,Q9QX74                                                                       |
| 1256 | 1,2,3,25,2<br>7,28,30,32 | 4,5,6,7,8,2<br>6,29,31 | 7  | P06760,P22273,P49134,P82471,Q5RJR2,Q99041,Q9QX74                                                         |
| 1257 | 1,2,3,25,2<br>7,28,31,32 | 4,5,6,7,8,2<br>6,29,30 | 6  | P06760,P22273,P49134,Q5RJR2,Q99041,Q9QX74                                                                |
| 1258 | 1,2,3,25,2<br>7,29,30,31 | 4,5,6,7,8,2<br>6,28,32 | 7  | O54728,P07150,P11598,P22273,P22282,Q63617,Q99041                                                         |
| 1259 | 1,2,3,25,2<br>7,29,30,32 | 4,5,6,7,8,2<br>6,28,31 | 5  | P07150,P22273,P82471,Q99041,Q9Z0J6                                                                       |
| 1260 | 1,2,3,25,2<br>7,29,31,32 | 4,5,6,7,8,2<br>6,28,30 | 3  | P07150,P22273,Q99041                                                                                     |
| 1261 | 1,2,3,25,2<br>7,30,31,32 | 4,5,6,7,8,2<br>6,28,29 | 14 | D3ZUC6,P06760,P06761,P07150,P11598,P21674,P22273,P22282,P49134,Q63617,Q6P6R2,Q99041,Q9QX74,Q9WTT6        |
| 1262 | 1,2,3,25,2<br>8,29,30,31 | 4,5,6,7,8,2<br>6,27,32 | 7  | P00714,P22273,P22282,P50115,P50116,Q99041,Q9Z0J6                                                         |
| 1263 | 1,2,3,25,2<br>8,29,30,32 | 4,5,6,7,8,2<br>6,27,31 | 8  | P22273,P22282,P50115,P50116,Q62975,Q68G31,Q99041,Q9Z0J6                                                  |
| 1264 | 1,2,3,25,2<br>8,29,31,32 | 4,5,6,7,8,2<br>6,27,30 | 7  | P21588,P22273,P22282,P50115,P50116,Q99041,Q9Z0J6                                                         |
| 1265 | 1,2,3,25,2<br>8,30,31,32 | 4,5,6,7,8,2<br>6,27,29 | 11 | P06760,P06761,P22273,P22282,P50115,P50116,Q4G075,Q62975,Q99041,Q9QX74,Q9WTT6                             |
| 1266 | 1,2,3,25,2<br>9,30,31,32 | 4,5,6,7,8,2<br>6,27,28 | 13 | D3ZUC6,P06761,P07150,P11598,P22273,P22282,P50115,P50116,Q4G075,Q63617,Q99041,Q9WTT6,Q9Z0J6               |

|      |                                              |                                                                  |
|------|----------------------------------------------|------------------------------------------------------------------|
| 1267 | 1,2,3,26,2 4,5,6,7,8,2<br>7,28,29,30 5,31,32 | 3 O54858,P82471,Q9WVK7                                           |
| 1268 | 1,2,3,26,2 4,5,6,7,8,2<br>7,28,29,31 5,30,32 | 3 P0DMW0;P0DMW1,Q99041,Q9WVK7                                    |
| 1269 | 1,2,3,26,2 4,5,6,7,8,2<br>7,28,29,32 5,30,31 | 2 O54858,P82471                                                  |
| 1270 | 1,2,3,26,2 4,5,6,7,8,2<br>7,28,30,31 5,29,32 | 3 P00714,P06760,P22273                                           |
| 1271 | 1,2,3,26,2 4,5,6,7,8,2<br>7,28,30,32 5,29,31 | 3 P06760,P22273,P82471                                           |
| 1272 | 1,2,3,26,2 4,5,6,7,8,2<br>7,28,31,32 5,29,30 | 3 P06760,P22273,Q99041                                           |
| 1273 | 1,2,3,26,2 4,5,6,7,8,2<br>7,29,30,31 5,28,32 | 4 P22273,P22282,Q63617,Q99041                                    |
| 1274 | 1,2,3,26,2 4,5,6,7,8,2<br>7,29,30,32 5,28,31 | 2 P22273,P82471                                                  |
| 1275 | 1,2,3,26,2 4,5,6,7,8,2<br>7,29,31,32 5,28,30 | 2 P22273,Q99041                                                  |
| 1276 | 1,2,3,26,2 4,5,6,7,8,2<br>7,30,31,32 5,28,29 | 6 P06760,P06761,P22273,P22282,Q63617,Q99041                      |
| 1277 | 1,2,3,26,2 4,5,6,7,8,2<br>8,29,30,31 5,27,32 | 8 P00714,P22273,P22282,P50115,P50116,Q01984,Q4G075,Q99041        |
| 1278 | 1,2,3,26,2 4,5,6,7,8,2<br>8,29,30,32 5,27,31 | 8 P22273,P22282,P50115,P50116,P82471,Q4G075,Q68G31,Q99041        |
| 1279 | 1,2,3,26,2 4,5,6,7,8,2<br>8,29,31,32 5,27,30 | 6 P22273,P50115,P50116,Q4G075,Q99041,Q99376                      |
| 1280 | 1,2,3,26,2 4,5,6,7,8,2<br>8,30,31,32 5,27,29 | 7 P06760,P22273,P22282,P50115,P50116,Q4G075,Q99041               |
| 1281 | 1,2,3,26,2 4,5,6,7,8,2<br>9,30,31,32 5,27,28 | 9 P06761,P11598,P22273,P22282,P50115,P50116,Q4G075,Q63617,Q99041 |
| 1282 | 1,2,3,27,2 4,5,6,7,8,2<br>8,29,30,31 5,26,32 | 2 P22273,Q99041                                                  |
| 1283 | 1,2,3,27,2 4,5,6,7,8,2<br>8,29,30,32 5,26,31 | 3 P22273,Q63150,Q9Z0V6                                           |
| 1284 | 1,2,3,27,2 4,5,6,7,8,2<br>8,29,31,32 5,26,30 | 3 P22273,P49134,Q99041                                           |
| 1285 | 1,2,3,27,2 4,5,6,7,8,2<br>8,30,31,32 5,26,29 | 4 P06760,P22273,P49134,Q9QX74                                    |
| 1286 | 1,2,3,27,2 4,5,6,7,8,2<br>9,30,31,32 5,26,28 | 4 P07150,P22273,Q99041,Q9WTT6                                    |

|      |                          |                                |    |                                                                                                                                                                         |
|------|--------------------------|--------------------------------|----|-------------------------------------------------------------------------------------------------------------------------------------------------------------------------|
| 1287 | 1,2,3,28,2<br>9,30,31,32 | 4,5,6,7,8,2<br>5,26,27         | 7  | P22273,P22282,P50115,P50116,Q4G075,Q99041,Q9WTT6                                                                                                                        |
| 1288 | 1,2,4,5,6,7<br>,8,25     | 3,26,27,28<br>,29,30,31,<br>32 | 12 | O54858,P02454,P02631,P06911,P12020,P35952,P50115,P52590,Q09030,Q4KLZ6,Q99041,Q9QZQ5                                                                                     |
| 1289 | 1,2,4,5,6,7<br>,8,26     | 3,25,27,28<br>,29,30,31,<br>32 | 17 | O54858,P00762,P02454,P02631,P11598,P20762,P22273,P35952,P50115,P52590,P97580,Q30KJ2,Q5RJR2,Q5RLM2,Q99041,Q9QZQ5,Q9Z0J6                                                  |
| 1290 | 1,2,4,5,6,7<br>,8,27     | 3,25,26,28<br>,29,30,31,<br>32 | 24 | O54858,P00731,P01039,P02454,P02631,P06911,P11598,P19218,P22273,P22282,P50115,P50116,P52590,P97580,Q03191,Q10758,Q30KJ2,Q4G075,Q66H69,Q91ZS3,Q99041,Q9JJ50,Q9QZQ5,Q9Z0J6 |
| 1291 | 1,2,4,5,6,7<br>,8,28     | 3,25,26,27<br>,29,30,31,<br>32 | 20 | O54858,P00762,P02454,P02631,P06761,P06911,P07171,P11598,P12020,P19218,P21674,P22273,P22282,P52590,Q63532,Q63617,Q99041,Q9JI85,Q9QZQ5,Q9Z0J6                             |
| 1292 | 1,2,4,5,6,7<br>,8,29     | 3,25,26,27<br>,28,30,31,<br>32 | 12 | O70594,P00762,P02631,P06911,P11598,P21674,P22273,P42854,P52590,P62804,Q5RJR2,Q99041                                                                                     |
| 1293 | 1,2,4,5,6,7<br>,8,30     | 3,25,26,27<br>,28,29,31,<br>32 | 18 | O54858,P00762,P02631,P06911,P19218,P35952,P49744,P52590,P97580,Q30KJ2,Q5RJR2,Q63532,Q6IFU8,Q6IG05,Q6IMF3,Q6P6Q2,Q99041,Q9Z0J6                                           |
| 1294 | 1,2,4,5,6,7<br>,8,31     | 3,25,26,27<br>,28,29,30,<br>32 | 11 | O54858,P00762,P02454,P06911,P12020,P52590,Q5RJR2,Q63532,Q99041,Q9QZQ5,Q9Z0J6                                                                                            |
| 1295 | 1,2,4,5,6,7<br>,8,32     | 3,25,26,27<br>,28,29,30,<br>31 | 11 | O35276,O54858,P02454,P02631,P0DP29,P0DP30,P0DP31,P11598,P52590,Q63532,Q99041,Q9QZQ5,Q9Z0J6                                                                              |
| 1296 | 1,2,4,5,6,7<br>,25,26    | 3,8,27,28,<br>29,30,31,3<br>2  | 6  | P00762,P21588,P52590,Q4KLZ6,Q9EQS0,Q9WVH8                                                                                                                               |
| 1297 | 1,2,4,5,6,7<br>,25,27    | 3,8,26,28,<br>29,30,31,3<br>2  | 5  | P01039,P50116,P52590,Q03191,Q4KLZ6                                                                                                                                      |
| 1298 | 1,2,4,5,6,7<br>,25,28    | 3,8,26,27,<br>29,30,31,3<br>2  | 4  | P00762,P11598,P52590,Q4KLZ6                                                                                                                                             |
| 1299 | 1,2,4,5,6,7<br>,25,29    | 3,8,26,27,<br>28,30,31,3<br>2  | 4  | P00762,P52590,Q4KLZ6,Q9QWN8                                                                                                                                             |
| 1300 | 1,2,4,5,6,7<br>,25,30    | 3,8,26,27,<br>28,29,31,3<br>2  | 6  | P26342,P52590,Q4KLZ6,Q6P6R2,Q9EQS0,Q9QWN8                                                                                                                               |

|      |                       |                               |                                                                                |
|------|-----------------------|-------------------------------|--------------------------------------------------------------------------------|
| 1301 | 1,2,4,5,6,7<br>,25,31 | 3,8,26,27,<br>28,29,30,3<br>2 | 7 P00762,P52590,Q4KLZ6,Q63532,Q9EQS0,Q9QWN8,Q9WVH8                             |
| 1302 | 1,2,4,5,6,7<br>,25,32 | 3,8,26,27,<br>28,29,30,3<br>1 | 7 P0DP29;P0DP30;P0DP31,P26342,P52590,Q4KLZ6,Q6P6R2,Q9EQS0,Q9R168               |
| 1303 | 1,2,4,5,6,7<br>,26,27 | 3,8,25,28,<br>29,30,31,3<br>2 | 8 P01039,P11598,P21588,P50116,P52590,Q03191,Q9JJ50,Q9Z0J6                      |
| 1304 | 1,2,4,5,6,7<br>,26,28 | 3,8,25,27,<br>29,30,31,3<br>2 | 7 P00762,P11598,P14173,P21588,P52590,Q5RLM2,Q9Z0J6                             |
| 1305 | 1,2,4,5,6,7<br>,26,29 | 3,8,25,27,<br>28,30,31,3<br>2 | 4 P00762,P14173,P21588,P52590                                                  |
| 1306 | 1,2,4,5,6,7<br>,26,30 | 3,8,25,27,<br>28,29,31,3<br>2 | 6 P00762,P21588,P52590,Q80WL1,Q9EQS0,Q9Z0J6                                    |
| 1307 | 1,2,4,5,6,7<br>,26,31 | 3,8,25,27,<br>28,29,30,3<br>2 | 8 P00762,P14173,P52590,Q63150,Q63532,Q9EQS0,Q9WVH8,Q9Z0J6                      |
| 1308 | 1,2,4,5,6,7<br>,26,32 | 3,8,25,27,<br>28,29,30,3<br>1 | 5 P14173,P52590,Q5M872,Q9EQS0,Q9Z0J6                                           |
| 1309 | 1,2,4,5,6,7<br>,27,28 | 3,8,25,26,<br>29,30,31,3<br>2 | 9 P00762,P01039,P11598,P19218,P21588,P50116,P52590,Q03191,Q9Z0J6               |
| 1310 | 1,2,4,5,6,7<br>,27,29 | 3,8,25,26,<br>28,30,31,3<br>2 | 9 O08839,P01039,P19223,P21588,P50116,P52590,Q03191,Q923V8,Q9JJ50               |
| 1311 | 1,2,4,5,6,7<br>,27,30 | 3,8,25,26,<br>28,29,31,3<br>2 | 9 P01039,P19218,P21588,P49744,P50116,P52590,Q03191,Q80WL1,Q9Z0J6               |
| 1312 | 1,2,4,5,6,7<br>,27,31 | 3,8,25,26,<br>28,29,30,3<br>2 | 7 P01039,P50116,P52590,P80299,Q03191,Q9QZ76,Q9Z0J6                             |
| 1313 | 1,2,4,5,6,7<br>,27,32 | 3,8,25,26,<br>28,29,30,3<br>1 | 9 P01039,P0DP29;P0DP30;P0DP31,P11598,P50116,P52590,P80299,Q03191,Q9JJ50,Q9Z0J6 |

|      |                       |                               |                                                                                 |
|------|-----------------------|-------------------------------|---------------------------------------------------------------------------------|
| 1314 | 1,2,4,5,6,7<br>,28,29 | 3,8,25,26,<br>27,30,31,3<br>2 | 7 P00762,P11598,P14173,P21674,P47967,P52590,Q63617                              |
| 1315 | 1,2,4,5,6,7<br>,28,30 | 3,8,25,26,<br>27,29,31,3<br>2 | 6 P00762,P19218,P21588,P52590,Q80WL1,Q9Z0J6                                     |
| 1316 | 1,2,4,5,6,7<br>,28,31 | 3,8,25,26,<br>27,29,30,3<br>2 | 6 P00762,P11598,P14173,P52590,Q63532,Q9Z0J6                                     |
| 1317 | 1,2,4,5,6,7<br>,28,32 | 3,8,25,26,<br>27,29,30,3<br>1 | 5 P0DP29;P0DP30;P0DP31,P11598,P14173,P52590,Q9Z0J6                              |
| 1318 | 1,2,4,5,6,7<br>,29,30 | 3,8,25,26,<br>27,28,31,3<br>2 | 11 B1H234,P00762,P01835,P17046,P21588,P26342,P36860,P52590,Q5RJR2,Q80WL1,Q9QWN8 |
| 1319 | 1,2,4,5,6,7<br>,29,31 | 3,8,25,26,<br>27,28,30,3<br>2 | 9 B1H234,P00762,P01835,P26342,P36860,P52590,P80299,Q5RJR2,Q9QWN8                |
| 1320 | 1,2,4,5,6,7<br>,29,32 | 3,8,25,26,<br>27,28,30,3<br>1 | 6 P01835,P14173,P26342,P36860,P52590,P80299                                     |
| 1321 | 1,2,4,5,6,7<br>,30,31 | 3,8,25,26,<br>27,28,29,3<br>2 | 11 P00762,P26342,P36860,P52590,Q5RJR2,Q63532,Q6P6R2,Q8CFN2,Q9EQS0,Q9QWN8,Q9Z0J6 |
| 1322 | 1,2,4,5,6,7<br>,30,32 | 3,8,25,26,<br>27,28,29,3<br>1 | 9 P0DP29;P0DP30;P0DP31,P26342,P36860,P52590,P70549,Q6P6R2,Q9EQS0,Q9R168,Q9Z0J6  |
| 1323 | 1,2,4,5,6,7<br>,31,32 | 3,8,25,26,<br>27,28,29,3<br>0 | 9 P0DP29;P0DP30;P0DP31,P14173,P26342,P36860,P52590,P80299,Q63532,Q6P6R2,Q9Z0J6  |
| 1324 | 1,2,4,5,6,8<br>,25,26 | 3,7,27,28,<br>29,30,31,3<br>2 | 9 G3V686,O54858,P08649,P13432,P35952,P52590,P97580,Q30KJ2,Q4KLZ6                |
| 1325 | 1,2,4,5,6,8<br>,25,27 | 3,7,26,28,<br>29,30,31,3<br>2 | 9 P15399,P17559,P52590,P97580,Q03191,Q10758,Q30KJ2,Q4KLZ6,Q9QZQ5                |
| 1326 | 1,2,4,5,6,8<br>,25,28 | 3,7,26,27,<br>29,30,31,3<br>2 | 6 P02631,P06911,P08649,P52590,Q4KLZ6,Q9QZQ5                                     |



|      |                       |                               |                                                                                                                    |
|------|-----------------------|-------------------------------|--------------------------------------------------------------------------------------------------------------------|
| 1327 | 1,2,4,5,6,8<br>,25,29 | 3,7,26,27,<br>28,30,31,3<br>2 | 3 P42854,P52590,Q4KLZ6                                                                                             |
| 1328 | 1,2,4,5,6,8<br>,25,30 | 3,7,26,27,<br>28,29,31,3<br>2 | 11 O54858,P35952,P52590,P97580,Q09030,Q30KJ2,Q4KLZ6,Q6IFU8,Q6IG05,Q6IMF3,Q6P6Q2                                    |
| 1329 | 1,2,4,5,6,8<br>,25,31 | 3,7,26,27,<br>28,29,30,3<br>2 | 6 O54858,P06911,P52590,Q09030,Q4KLZ6,Q63532                                                                        |
| 1330 | 1,2,4,5,6,8<br>,25,32 | 3,7,26,27,<br>28,29,30,3<br>1 | 7 O54858,P02454,P02631,P13432,P52590,Q4KLZ6,Q9QZQ5                                                                 |
| 1331 | 1,2,4,5,6,8<br>,26,27 | 3,7,25,28,<br>29,30,31,3<br>2 | 10 P15399,P17559,P20762,P21588,P52590,P97580,Q03191,Q10758,Q30KJ2,Q9JJ50                                           |
| 1332 | 1,2,4,5,6,8<br>,26,28 | 3,7,25,27,<br>29,30,31,3<br>2 | 8 P00762,P08649,P15399,P20762,P52590,P97580,Q30KJ2,Q9JI85                                                          |
| 1333 | 1,2,4,5,6,8<br>,26,29 | 3,7,25,27,<br>28,30,31,3<br>2 | 5 P42854,P52590,P97580,Q30KJ2,Q5RJR2                                                                               |
| 1334 | 1,2,4,5,6,8<br>,26,30 | 3,7,25,27,<br>28,29,31,3<br>2 | 9 P20762,P21588,P35952,P52590,P97580,Q30KJ2,Q5RJR2,Q6IG05,Q6P6Q2                                                   |
| 1335 | 1,2,4,5,6,8<br>,26,31 | 3,7,25,27,<br>28,29,30,3<br>2 | 6 O54858,P52590,P97580,Q30KJ2,Q5RJR2,Q63532                                                                        |
| 1336 | 1,2,4,5,6,8<br>,26,32 | 3,7,25,27,<br>28,29,30,3<br>1 | 5 P13432,P18418,P52590,P97580,Q30KJ2                                                                               |
| 1337 | 1,2,4,5,6,8<br>,27,28 | 3,7,25,26,<br>29,30,31,3<br>2 | 10 P15399,P19218,P22282,P52590,P97580,Q03191,Q10758,Q30KJ2,Q9JI85,Q9QZQ5                                           |
| 1338 | 1,2,4,5,6,8<br>,27,29 | 3,7,25,26,<br>28,30,31,3<br>2 | 11 P00731,P15399,P19218,P19223,P42854,P52590,P97580,Q03191,Q10758,Q30KJ2,Q9JJ50                                    |
| 1339 | 1,2,4,5,6,8<br>,27,30 | 3,7,25,26,<br>28,29,31,3<br>2 | 16 P00731,P01039,P15399,P19218,P21588,P52590,P97580,Q03191,Q10758,Q30KJ2,Q5I0J9,Q6IFU7,Q6IFU8,Q6IG05,Q6IMF3,Q6P6Q2 |

|      |                        |                               |                                                                          |
|------|------------------------|-------------------------------|--------------------------------------------------------------------------|
| 1340 | 1,2,4,5,6,8<br>,27,31  | 3,7,25,26,<br>28,29,30,3<br>2 | 10 O54858,P01039,P15399,P23739,P52590,P97580,Q03191,Q10758,Q30KJ2,Q63532 |
| 1341 | 1,2,4,5,6,8<br>,27,32  | 3,7,25,26,<br>28,29,30,3<br>1 | 8 P15399,P19218,P52590,P97580,Q03191,Q10758,Q30KJ2,Q9QZQ5                |
| 1342 | 1,2,4,5,6,8<br>,28,29  | 3,7,25,26,<br>27,30,31,3<br>2 | 5 P00762,P21674,P42854,P52590,Q9JI85                                     |
| 1343 | 1,2,4,5,6,8<br>,28,30  | 3,7,25,26,<br>27,29,31,3<br>2 | 4 P19218,P52590,Q30KJ2,Q6P6Q2                                            |
| 1344 | 1,2,4,5,6,8<br>,28,31  | 3,7,25,26,<br>27,29,30,3<br>2 | 2 P52590,Q63532                                                          |
| 1345 | 1,2,4,5,6,8<br>,28,32  | 3,7,25,26,<br>27,29,30,3<br>1 | 5 P02454,P52590,Q63532,Q9JI85,Q9QZQ5                                     |
| 1346 | 1,2,4,5,6,8<br>,29,30  | 3,7,25,26,<br>27,28,31,3<br>2 | 8 P19218,P52590,Q5RJR2,Q6IFU7,Q6IFU8,Q6IG05,Q6IMF3,Q6P6Q2                |
| 1347 | 1,2,4,5,6,8<br>,29,31  | 3,7,25,26,<br>27,28,30,3<br>2 | 3 P52590,Q5RJR2,Q63532                                                   |
| 1348 | 1,2,4,5,6,8<br>,29,32  | 3,7,25,26,<br>27,28,30,3<br>1 | 2 P42854,P52590                                                          |
| 1349 | 1,2,4,5,6,8<br>,30,31  | 3,7,25,26,<br>27,28,29,3<br>2 | 10 O54858,P19218,P35952,P52590,Q5RJR2,Q63532,Q6IFU8,Q6IG05,Q6IMF3,Q6P6Q2 |
| 1350 | 1,2,4,5,6,8<br>,30,32  | 3,7,25,26,<br>27,28,29,3<br>1 | 10 O54858,P19218,P20646,P26342,P52590,Q5I0J9,Q6IG05,Q6IMF3,Q6P6Q2,Q6P6R2 |
| 1351 | 1,2,4,5,6,8<br>,31,32  | 3,7,25,26,<br>27,28,29,3<br>0 | 3 O54858,P52590,Q63532                                                   |
| 1352 | 1,2,4,5,6,2<br>5,26,27 | 3,7,8,28,2<br>9,30,31,32      | 7 P01039,P21588,P35280,P52590,Q03191,Q4KLZ6,Q9JJ50                       |
| 1353 | 1,2,4,5,6,2<br>5,26,28 | 3,7,8,27,2<br>9,30,31,32      | 6 P00762,P21588,P35280,P52590,Q4KLZ6,Q9EQS0                              |

|      |                        |                          |   |                                                         |
|------|------------------------|--------------------------|---|---------------------------------------------------------|
| 1354 | 1,2,4,5,6,2<br>5,26,29 | 3,7,8,27,2<br>8,30,31,32 | 4 | P35280,P52590,Q4KLZ6,Q9EQS0                             |
| 1355 | 1,2,4,5,6,2<br>5,26,30 | 3,7,8,27,2<br>8,29,31,32 | 5 | P21588,P52590,Q4KLZ6,Q812E4,Q9EQS0                      |
| 1356 | 1,2,4,5,6,2<br>5,26,31 | 3,7,8,27,2<br>8,29,30,32 | 6 | P35280,P52590,Q4KLZ6,Q63150,Q812E4,Q9EQS0               |
| 1357 | 1,2,4,5,6,2<br>5,26,32 | 3,7,8,27,2<br>8,29,30,31 | 5 | P00507,P52590,Q06000,Q4KLZ6,Q9EQS0                      |
| 1358 | 1,2,4,5,6,2<br>5,27,28 | 3,7,8,26,2<br>9,30,31,32 | 4 | P35280,P52590,Q03191,Q4KLZ6                             |
| 1359 | 1,2,4,5,6,2<br>5,27,29 | 3,7,8,26,2<br>8,30,31,32 | 5 | P35280,P52590,Q03191,Q4KLZ6,Q923V8                      |
| 1360 | 1,2,4,5,6,2<br>5,27,30 | 3,7,8,26,2<br>8,29,31,32 | 6 | P01039,P21588,P52590,Q03191,Q4KLZ6,Q6P6R2               |
| 1361 | 1,2,4,5,6,2<br>5,27,31 | 3,7,8,26,2<br>8,29,30,32 | 6 | P01039,P35280,P52590,Q03191,Q4KLZ6,Q9QYP1               |
| 1362 | 1,2,4,5,6,2<br>5,27,32 | 3,7,8,26,2<br>8,29,30,31 | 5 | P01039,P52590,Q03191,Q4KLZ6,Q6P6R2                      |
| 1363 | 1,2,4,5,6,2<br>5,28,29 | 3,7,8,26,2<br>7,30,31,32 | 4 | P00762,P35280,P52590,Q4KLZ6                             |
| 1364 | 1,2,4,5,6,2<br>5,28,30 | 3,7,8,26,2<br>7,29,31,32 | 3 | P52590,Q4KLZ6,Q9EQS0                                    |
| 1365 | 1,2,4,5,6,2<br>5,28,31 | 3,7,8,26,2<br>7,29,30,32 | 3 | P35280,P52590,Q4KLZ6                                    |
| 1366 | 1,2,4,5,6,2<br>5,28,32 | 3,7,8,26,2<br>7,29,30,31 | 3 | P52590,Q4KLZ6,Q9QX74                                    |
| 1367 | 1,2,4,5,6,2<br>5,29,30 | 3,7,8,26,2<br>7,28,31,32 | 3 | P52590,Q4KLZ6,Q9QWN8                                    |
| 1368 | 1,2,4,5,6,2<br>5,29,31 | 3,7,8,26,2<br>7,28,30,32 | 5 | B1H234,P35280,P52590,Q4KLZ6,Q9QWN8                      |
| 1369 | 1,2,4,5,6,2<br>5,29,32 | 3,7,8,26,2<br>7,28,30,31 | 2 | P52590,Q4KLZ6                                           |
| 1370 | 1,2,4,5,6,2<br>5,30,31 | 3,7,8,26,2<br>7,28,29,32 | 8 | P52590,Q4KLZ6,Q6P6R2,Q812E4,Q8CFN2,Q9EQS0,Q9QWN8,Q9WTT6 |
| 1371 | 1,2,4,5,6,2<br>5,30,32 | 3,7,8,26,2<br>7,28,29,31 | 7 | P26342,P52590,Q4KLZ6,Q6P6R2,Q9EQS0,Q9QX74,Q9WTT6        |
| 1372 | 1,2,4,5,6,2<br>5,31,32 | 3,7,8,26,2<br>7,28,29,30 | 6 | P26342,P52590,Q4KLZ6,Q6P6R2,Q9EQS0,Q9WTT6               |
| 1373 | 1,2,4,5,6,2<br>6,27,28 | 3,7,8,25,2<br>9,30,31,32 | 4 | P21588,P35280,P52590,Q03191                             |

|      |                        |                          |                                                                  |
|------|------------------------|--------------------------|------------------------------------------------------------------|
| 1374 | 1,2,4,5,6,2<br>6,27,29 | 3,7,8,25,2<br>8,30,31,32 | 7 P02625,P21588,P35280,P52590,Q03191,Q923V8,Q9JJ50               |
| 1375 | 1,2,4,5,6,2<br>6,27,30 | 3,7,8,25,2<br>8,29,31,32 | 7 P01039,P21588,P52590,Q03191,Q80WL1,Q9EQS0,Q9JJ50               |
| 1376 | 1,2,4,5,6,2<br>6,27,31 | 3,7,8,25,2<br>8,29,30,32 | 5 P01039,P35280,P52590,Q03191,Q9Z0J6                             |
| 1377 | 1,2,4,5,6,2<br>6,27,32 | 3,7,8,25,2<br>8,29,30,31 | 5 P01039,P21588,P52590,Q03191,Q9JJ50                             |
| 1378 | 1,2,4,5,6,2<br>6,28,29 | 3,7,8,25,2<br>7,30,31,32 | 5 P00762,P02625,P21588,P35280,P52590                             |
| 1379 | 1,2,4,5,6,2<br>6,28,30 | 3,7,8,25,2<br>7,29,31,32 | 4 P00762,P21588,P52590,Q9EQS0                                    |
| 1380 | 1,2,4,5,6,2<br>6,28,31 | 3,7,8,25,2<br>7,29,30,32 | 4 P00762,P35280,P52590,Q9EQS0                                    |
| 1381 | 1,2,4,5,6,2<br>6,28,32 | 3,7,8,25,2<br>7,29,30,31 | 3 P14173,P52590,Q9EQS0                                           |
| 1382 | 1,2,4,5,6,2<br>6,29,30 | 3,7,8,25,2<br>7,28,31,32 | 9 B1H234,P00762,P21588,P36860,P52590,Q5RJR2,Q80WL1,Q923V8,Q9EQS0 |
| 1383 | 1,2,4,5,6,2<br>6,29,31 | 3,7,8,25,2<br>7,28,30,32 | 7 B1H234,O70417,P00762,P35280,P36860,P52590,Q5RJR2               |
| 1384 | 1,2,4,5,6,2<br>6,29,32 | 3,7,8,25,2<br>7,28,30,31 | 2 P36860,P52590                                                  |
| 1385 | 1,2,4,5,6,2<br>6,30,31 | 3,7,8,25,2<br>7,28,29,32 | 6 P36860,P52590,Q5RJR2,Q812E4,Q9EQS0,Q9Z2L0                      |
| 1386 | 1,2,4,5,6,2<br>6,30,32 | 3,7,8,25,2<br>7,28,29,31 | 5 P21588,P26342,P36860,P52590,Q9EQS0                             |
| 1387 | 1,2,4,5,6,2<br>6,31,32 | 3,7,8,25,2<br>7,28,29,30 | 3 P36860,P52590,Q9EQS0                                           |
| 1388 | 1,2,4,5,6,2<br>7,28,29 | 3,7,8,25,2<br>6,30,31,32 | 5 P02625,P21588,P35280,P52590,Q03191                             |
| 1389 | 1,2,4,5,6,2<br>7,28,30 | 3,7,8,25,2<br>6,29,31,32 | 5 P19218,P21588,P52590,Q03191,Q5I0J9                             |
| 1390 | 1,2,4,5,6,2<br>7,28,31 | 3,7,8,25,2<br>6,29,30,32 | 4 P35280,P52590,Q03191,Q9Z0J6                                    |
| 1391 | 1,2,4,5,6,2<br>7,28,32 | 3,7,8,25,2<br>6,29,30,31 | 3 P52590,Q03191,Q62761;Q62762;Q62763                             |
| 1392 | 1,2,4,5,6,2<br>7,29,30 | 3,7,8,25,2<br>6,28,31,32 | 8 B1H234,P19218,P19223,P21588,P52590,Q03191,Q5I0J9,Q923V8        |
| 1393 | 1,2,4,5,6,2<br>7,29,31 | 3,7,8,25,2<br>6,28,30,32 | 6 B1H234,P01039,P35280,P52590,P80299,Q03191                      |

|      |                        |                               |                                                                          |
|------|------------------------|-------------------------------|--------------------------------------------------------------------------|
| 1394 | 1,2,4,5,6,2<br>7,29,32 | 3,7,8,25,2<br>6,28,30,31      | 3 P52590,Q03191,Q9JJ50                                                   |
| 1395 | 1,2,4,5,6,2<br>7,30,31 | 3,7,8,25,2<br>6,28,29,32      | 7 P01039,P36860,P52590,Q03191,Q6P6R2,Q9WTT6,Q9Z0J6                       |
| 1396 | 1,2,4,5,6,2<br>7,30,32 | 3,7,8,25,2<br>6,28,29,31      | 10 P01039,P19218,P52590,P70549,Q03191,Q5I0J9,Q64093,Q6P6R2,Q9QX74,Q9WTT6 |
| 1397 | 1,2,4,5,6,2<br>7,31,32 | 3,7,8,25,2<br>6,28,29,30      | 7 P01039,P52590,P80299,Q03191,Q6P6R2,Q9WTT6,Q9Z0J6                       |
| 1398 | 1,2,4,5,6,2<br>8,29,30 | 3,7,8,25,2<br>6,27,31,32      | 4 B1H234,P00762,P21588,P52590                                            |
| 1399 | 1,2,4,5,6,2<br>8,29,31 | 3,7,8,25,2<br>6,27,30,32      | 4 B1H234,P00762,P35280,P52590                                            |
| 1400 | 1,2,4,5,6,2<br>8,29,32 | 3,7,8,25,2<br>6,27,30,31      | 1 P52590                                                                 |
| 1401 | 1,2,4,5,6,2<br>8,30,31 | 3,7,8,25,2<br>6,27,29,32      | 4 P00762,P52590,Q63532,Q9WTT6                                            |
| 1402 | 1,2,4,5,6,2<br>8,30,32 | 3,7,8,25,2<br>6,27,29,31      | 5 P52590,Q5I0J9,Q8VD89,Q9QX74,Q9WTT6                                     |
| 1403 | 1,2,4,5,6,2<br>8,31,32 | 3,7,8,25,2<br>6,27,29,30      | 4 P22006,P52590,Q63532,Q9WTT6                                            |
| 1404 | 1,2,4,5,6,2<br>9,30,31 | 3,7,8,25,2<br>6,27,28,32      | 7 B1H234,P26342,P36860,P52590,Q5RJR2,Q9QWN8,Q9WTT6                       |
| 1405 | 1,2,4,5,6,2<br>9,30,32 | 3,7,8,25,2<br>6,27,28,31      | 7 B1H234,O55145,P26342,P36860,P52590,Q5I0J9,Q9WTT6                       |
| 1406 | 1,2,4,5,6,2<br>9,31,32 | 3,7,8,25,2<br>6,27,28,30      | 7 B1H234,O70417,P26342,P36860,P52590,P80299,Q9WTT6                       |
| 1407 | 1,2,4,5,6,3<br>0,31,32 | 3,7,8,25,2<br>6,27,28,29      | 8 P20646,P26342,P36860,P52590,Q6P6R2,Q9EQS0,Q9QX74,Q9WTT6                |
| 1408 | 1,2,4,5,7,8<br>,25,26  | 3,6,27,28,<br>29,30,31,3<br>2 | 3 G3V686,P20762,P22006                                                   |
| 1409 | 1,2,4,5,7,8<br>,25,27  | 3,6,26,28,<br>29,30,31,3<br>2 | 5 P22006,P50116,Q03191,Q4G075,Q66H69                                     |
| 1410 | 1,2,4,5,7,8<br>,25,28  | 3,6,26,27,<br>29,30,31,3<br>2 | 1 Q811M5                                                                 |
| 1411 | 1,2,4,5,7,8<br>,25,29  | 3,6,26,27,<br>28,30,31,3<br>2 | 4 P06760,P22006,P48032,P62804                                            |

|      |                       |                               |                                                                                               |
|------|-----------------------|-------------------------------|-----------------------------------------------------------------------------------------------|
| 1412 | 1,2,4,5,7,8<br>,25,30 | 3,6,26,27,<br>28,29,31,3<br>2 | 5 Q4FZU2,Q6IFU8,Q6IG05,Q6IMF3,Q6P6Q2                                                          |
| 1413 | 1,2,4,5,7,8<br>,25,31 | 3,6,26,27,<br>28,29,30,3<br>2 | 1 Q811M5                                                                                      |
| 1414 | 1,2,4,5,7,8<br>,25,32 | 3,6,26,27,<br>28,29,30,3<br>1 | 2 P01681,Q811M5                                                                               |
| 1415 | 1,2,4,5,7,8<br>,26,27 | 3,6,25,28,<br>29,30,31,3<br>2 | 10 P20762,P50116,P97580,Q03191,Q10758,Q30KJ2,Q4G075,Q5RLM2,Q66H69,Q9JJ50                      |
| 1416 | 1,2,4,5,7,8<br>,26,28 | 3,6,25,27,<br>29,30,31,3<br>2 | 3 P00762,P20762,Q5RLM2                                                                        |
| 1417 | 1,2,4,5,7,8<br>,26,29 | 3,6,25,27,<br>28,30,31,3<br>2 | 6 P06760,P20762,P22006,P62804,Q5RJR2,Q9QX74                                                   |
| 1418 | 1,2,4,5,7,8<br>,26,30 | 3,6,25,27,<br>28,29,31,3<br>2 | 5 P20762,Q5RJR2,Q6IFU8,Q6IMF3,Q6P6Q2                                                          |
| 1419 | 1,2,4,5,7,8<br>,26,31 | 3,6,25,27,<br>28,29,30,3<br>2 | 3 P20762,Q5RJR2,Q5RLM2                                                                        |
| 1420 | 1,2,4,5,7,8<br>,26,32 | 3,6,25,27,<br>28,29,30,3<br>1 | 1 P20762                                                                                      |
| 1421 | 1,2,4,5,7,8<br>,27,28 | 3,6,25,26,<br>29,30,31,3<br>2 | 10 P19218,P22282,P25809,P47967,P50116,P62804,Q03191,Q10758,Q4G075,Q66H69                      |
| 1422 | 1,2,4,5,7,8<br>,27,29 | 3,6,25,26,<br>28,30,31,3<br>2 | 12 P00731,P06760,P19223,P22006,P25809,P62804,Q00715,Q03191,Q10758,Q4G075,Q5I0D1,Q66H69        |
| 1423 | 1,2,4,5,7,8<br>,27,30 | 3,6,25,26,<br>28,29,31,3<br>2 | 13 P00731,P19218,P70549,Q03191,Q10758,Q30KJ2,Q4FZU2,Q4G075,Q66H69,Q6IFU8,Q6IG05,Q6IMF3,Q6P6Q2 |
| 1424 | 1,2,4,5,7,8<br>,27,31 | 3,6,25,26,<br>28,29,30,3<br>2 | 8 P00731,P23739,P82471,Q03191,Q10758,Q4G075,Q66H69,Q9Z0J6                                     |

|      |                        |                               |                                                    |
|------|------------------------|-------------------------------|----------------------------------------------------|
| 1425 | 1,2,4,5,7,8<br>,27,32  | 3,6,25,26,<br>28,29,30,3<br>1 | 4 Q03191,Q10758,Q66H69,Q6TMA8                      |
| 1426 | 1,2,4,5,7,8<br>,28,29  | 3,6,25,26,<br>27,30,31,3<br>2 | 6 P00762,P06760,P21674,P47967,P62804,Q00715        |
| 1427 | 1,2,4,5,7,8<br>,28,30  | 3,6,25,26,<br>27,29,31,3<br>2 | 5 P19218,P62804,Q6IFU8,Q6IMF3,Q6P6Q2               |
| 1428 | 1,2,4,5,7,8<br>,28,31  | 3,6,25,26,<br>27,29,30,3<br>2 | 3 P82471,Q5RLM2,Q811M5                             |
| 1429 | 1,2,4,5,7,8<br>,28,32  | 3,6,25,26,<br>27,29,30,3<br>1 | 1 Q811M5                                           |
| 1430 | 1,2,4,5,7,8<br>,29,30  | 3,6,25,26,<br>27,28,31,3<br>2 | 6 P62804,Q4FZU2,Q5RJR2,Q6IFU8,Q6IMF3,Q6P6Q2        |
| 1431 | 1,2,4,5,7,8<br>,29,31  | 3,6,25,26,<br>27,28,30,3<br>2 | 3 P06760,P82471,Q5RJR2                             |
| 1432 | 1,2,4,5,7,8<br>,29,32  | 3,6,25,26,<br>27,28,30,3<br>1 | 0                                                  |
| 1433 | 1,2,4,5,7,8<br>,30,31  | 3,6,25,26,<br>27,28,29,3<br>2 | 7 P82471,Q4FZU2,Q5RJR2,Q6IFU8,Q6IG05,Q6IMF3,Q6P6Q2 |
| 1434 | 1,2,4,5,7,8<br>,30,32  | 3,6,25,26,<br>27,28,29,3<br>1 | 5 P26342,P70549,Q6IFU8,Q6IMF3,Q6P6Q2               |
| 1435 | 1,2,4,5,7,8<br>,31,32  | 3,6,25,26,<br>27,28,29,3<br>0 | 2 P82471,Q811M5                                    |
| 1436 | 1,2,4,5,7,2<br>5,26,27 | 3,6,8,28,2<br>9,30,31,32      | 2 P21588,Q03191                                    |
| 1437 | 1,2,4,5,7,2<br>5,26,28 | 3,6,8,27,2<br>9,30,31,32      | 0                                                  |
| 1438 | 1,2,4,5,7,2<br>5,26,29 | 3,6,8,27,2<br>8,30,31,32      | 2 P22006,Q9QZK9                                    |
| 1439 | 1,2,4,5,7,2<br>5,26,30 | 3,6,8,27,2<br>8,29,31,32      | 2 Q9EQS0,Q9R168                                    |

|      |                        |                          |                                                    |
|------|------------------------|--------------------------|----------------------------------------------------|
| 1440 | 1,2,4,5,7,2<br>5,26,31 | 3,6,8,27,2<br>8,29,30,32 | 0                                                  |
| 1441 | 1,2,4,5,7,2<br>5,26,32 | 3,6,8,27,2<br>8,29,30,31 | 1 Q9R168                                           |
| 1442 | 1,2,4,5,7,2<br>5,27,28 | 3,6,8,26,2<br>9,30,31,32 | 1 Q03191                                           |
| 1443 | 1,2,4,5,7,2<br>5,27,29 | 3,6,8,26,2<br>8,30,31,32 | 4 O89117,P19223,P22006,Q03191                      |
| 1444 | 1,2,4,5,7,2<br>5,27,30 | 3,6,8,26,2<br>8,29,31,32 | 2 P70549,Q03191                                    |
| 1445 | 1,2,4,5,7,2<br>5,27,31 | 3,6,8,26,2<br>8,29,30,32 | 3 P23739,Q03191,Q9QYP1                             |
| 1446 | 1,2,4,5,7,2<br>5,27,32 | 3,6,8,26,2<br>8,29,30,31 | 1 Q03191                                           |
| 1447 | 1,2,4,5,7,2<br>5,28,29 | 3,6,8,26,2<br>7,30,31,32 | 1 P00762                                           |
| 1448 | 1,2,4,5,7,2<br>5,28,30 | 3,6,8,26,2<br>7,29,31,32 | 1 Q9R168                                           |
| 1449 | 1,2,4,5,7,2<br>5,28,31 | 3,6,8,26,2<br>7,29,30,32 | 1 Q811M5                                           |
| 1450 | 1,2,4,5,7,2<br>5,28,32 | 3,6,8,26,2<br>7,29,30,31 | 2 Q811M5,Q9R168                                    |
| 1451 | 1,2,4,5,7,2<br>5,29,30 | 3,6,8,26,2<br>7,28,31,32 | 3 P22006,Q9QWN8,Q9R168                             |
| 1452 | 1,2,4,5,7,2<br>5,29,31 | 3,6,8,26,2<br>7,28,30,32 | 2 P09527,Q9QWN8                                    |
| 1453 | 1,2,4,5,7,2<br>5,29,32 | 3,6,8,26,2<br>7,28,30,31 | 1 Q9R168                                           |
| 1454 | 1,2,4,5,7,2<br>5,30,31 | 3,6,8,26,2<br>7,28,29,32 | 5 P09527,P26342,Q6P6R2,Q8CFN2,Q9QWN8               |
| 1455 | 1,2,4,5,7,2<br>5,30,32 | 3,6,8,26,2<br>7,28,29,31 | 4 P26342,P70549,Q6P6R2,Q9R168                      |
| 1456 | 1,2,4,5,7,2<br>5,31,32 | 3,6,8,26,2<br>7,28,29,30 | 3 P26342,Q6P6R2,Q811M5                             |
| 1457 | 1,2,4,5,7,2<br>6,27,28 | 3,6,8,25,2<br>9,30,31,32 | 7 P02625,P14173,P21588,P47967,P97840,Q03191,Q5RLM2 |
| 1458 | 1,2,4,5,7,2<br>6,27,29 | 3,6,8,25,2<br>8,30,31,32 | 5 P02625,P19223,P21588,Q03191,Q9JJ50               |
| 1459 | 1,2,4,5,7,2<br>6,27,30 | 3,6,8,25,2<br>8,29,31,32 | 3 P21588,Q03191,Q80WL1                             |



|      |                        |                          |                                             |
|------|------------------------|--------------------------|---------------------------------------------|
| 1460 | 1,2,4,5,7,2<br>6,27,31 | 3,6,8,25,2<br>8,29,30,32 | 2 Q03191,Q9Z0J6                             |
| 1461 | 1,2,4,5,7,2<br>6,27,32 | 3,6,8,25,2<br>8,29,30,31 | 3 P14173,Q03191,Q9JJ50                      |
| 1462 | 1,2,4,5,7,2<br>6,28,29 | 3,6,8,25,2<br>7,30,31,32 | 5 P00762,P02625,P14173,P47967,P97840        |
| 1463 | 1,2,4,5,7,2<br>6,28,30 | 3,6,8,25,2<br>7,29,31,32 | 3 P00762,P21588,Q9R168                      |
| 1464 | 1,2,4,5,7,2<br>6,28,31 | 3,6,8,25,2<br>7,29,30,32 | 3 P00762,P14173,Q5RLM2                      |
| 1465 | 1,2,4,5,7,2<br>6,28,32 | 3,6,8,25,2<br>7,29,30,31 | 2 P14173,Q9R168                             |
| 1466 | 1,2,4,5,7,2<br>6,29,30 | 3,6,8,25,2<br>7,28,31,32 | 2 P21588,Q80WL1                             |
| 1467 | 1,2,4,5,7,2<br>6,29,31 | 3,6,8,25,2<br>7,28,30,32 | 1 P00762                                    |
| 1468 | 1,2,4,5,7,2<br>6,29,32 | 3,6,8,25,2<br>7,28,30,31 | 2 P14173,Q9R168                             |
| 1469 | 1,2,4,5,7,2<br>6,30,31 | 3,6,8,25,2<br>7,28,29,32 | 3 P36860,Q8CFN2,Q9EQS0                      |
| 1470 | 1,2,4,5,7,2<br>6,30,32 | 3,6,8,25,2<br>7,28,29,31 | 3 P26342,P36860,Q9R168                      |
| 1471 | 1,2,4,5,7,2<br>6,31,32 | 3,6,8,25,2<br>7,28,29,30 | 1 P14173                                    |
| 1472 | 1,2,4,5,7,2<br>7,28,29 | 3,6,8,25,2<br>6,30,31,32 | 4 P02625,P47967,P97840,Q03191               |
| 1473 | 1,2,4,5,7,2<br>7,28,30 | 3,6,8,25,2<br>6,29,31,32 | 4 P19218,P21588,P70549,Q03191               |
| 1474 | 1,2,4,5,7,2<br>7,28,31 | 3,6,8,25,2<br>6,29,30,32 | 3 P80299,Q03191,Q9Z0J6                      |
| 1475 | 1,2,4,5,7,2<br>7,28,32 | 3,6,8,25,2<br>6,29,30,31 | 3 P14173,Q03191,Q62761;Q62762;Q62763        |
| 1476 | 1,2,4,5,7,2<br>7,29,30 | 3,6,8,25,2<br>6,28,31,32 | 6 P00731,P19223,P21588,Q03191,Q6P6Q2,Q923V8 |
| 1477 | 1,2,4,5,7,2<br>7,29,31 | 3,6,8,25,2<br>6,28,30,32 | 3 P19223,P80299,Q03191                      |
| 1478 | 1,2,4,5,7,2<br>7,29,32 | 3,6,8,25,2<br>6,28,30,31 | 3 P80299,Q03191,Q6TMA8                      |
| 1479 | 1,2,4,5,7,2<br>7,30,31 | 3,6,8,25,2<br>6,28,29,32 | 4 P80299,Q03191,Q9QYP1,Q9Z0J6               |

|      |                        |                          |   |                                           |
|------|------------------------|--------------------------|---|-------------------------------------------|
| 1480 | 1,2,4,5,7,2<br>7,30,32 | 3,6,8,25,2<br>6,28,29,31 | 4 | P70549,Q03191,Q6P6R2,Q9R168               |
| 1481 | 1,2,4,5,7,2<br>7,31,32 | 3,6,8,25,2<br>6,28,29,30 | 4 | P23739,P80299,Q03191,Q9Z0J6               |
| 1482 | 1,2,4,5,7,2<br>8,29,30 | 3,6,8,25,2<br>6,27,31,32 | 2 | P00762,P97840                             |
| 1483 | 1,2,4,5,7,2<br>8,29,31 | 3,6,8,25,2<br>6,27,30,32 | 2 | P00762,P80299                             |
| 1484 | 1,2,4,5,7,2<br>8,29,32 | 3,6,8,25,2<br>6,27,30,31 | 2 | P14173,P54921                             |
| 1485 | 1,2,4,5,7,2<br>8,30,31 | 3,6,8,25,2<br>6,27,29,32 | 1 | P00762                                    |
| 1486 | 1,2,4,5,7,2<br>8,30,32 | 3,6,8,25,2<br>6,27,29,31 | 3 | P26342,P70549,Q9R168                      |
| 1487 | 1,2,4,5,7,2<br>8,31,32 | 3,6,8,25,2<br>6,27,29,30 | 3 | P14173,P80299,Q811M5                      |
| 1488 | 1,2,4,5,7,2<br>9,30,31 | 3,6,8,25,2<br>6,27,28,32 | 5 | P26342,P36860,P80299,Q5RJR2,Q9QWN8        |
| 1489 | 1,2,4,5,7,2<br>9,30,32 | 3,6,8,25,2<br>6,27,28,31 | 4 | P17046,P26342,P36860,Q9R168               |
| 1490 | 1,2,4,5,7,2<br>9,31,32 | 3,6,8,25,2<br>6,27,28,30 | 3 | P26342,P36860,P80299                      |
| 1491 | 1,2,4,5,7,3<br>0,31,32 | 3,6,8,25,2<br>6,27,28,29 | 6 | P26342,P36860,P63081,P70549,P80299,Q6P6R2 |
| 1492 | 1,2,4,5,8,2<br>5,26,27 | 3,6,7,28,2<br>9,30,31,32 | 3 | P97580,Q03191,Q30KJ2                      |
| 1493 | 1,2,4,5,8,2<br>5,26,28 | 3,6,7,27,2<br>9,30,31,32 | 0 |                                           |
| 1494 | 1,2,4,5,8,2<br>5,26,29 | 3,6,7,27,2<br>8,30,31,32 | 1 | P22006                                    |
| 1495 | 1,2,4,5,8,2<br>5,26,30 | 3,6,7,27,2<br>8,29,31,32 | 3 | Q6IFU8,Q6IMF3,Q6P6Q2                      |
| 1496 | 1,2,4,5,8,2<br>5,26,31 | 3,6,7,27,2<br>8,29,30,32 | 0 |                                           |
| 1497 | 1,2,4,5,8,2<br>5,26,32 | 3,6,7,27,2<br>8,29,30,31 | 2 | P00507,P13432                             |
| 1498 | 1,2,4,5,8,2<br>5,27,28 | 3,6,7,26,2<br>9,30,31,32 | 2 | Q03191,Q10758                             |
| 1499 | 1,2,4,5,8,2<br>5,27,29 | 3,6,7,26,2<br>8,30,31,32 | 4 | P19223,P22006,Q03191,Q10758               |

|      |                        |                          |    |                                                                                     |
|------|------------------------|--------------------------|----|-------------------------------------------------------------------------------------|
| 1500 | 1,2,4,5,8,2<br>5,27,30 | 3,6,7,26,2<br>8,29,31,32 | 12 | P00731,P70549,Q03191,Q10758,Q30KJ2,Q4FZU2,Q6IFU7,Q6IFU8,Q6IFW6,Q6IG05,Q6IMF3,Q6P6Q2 |
| 1501 | 1,2,4,5,8,2<br>5,27,31 | 3,6,7,26,2<br>8,29,30,32 | 3  | P23739,Q03191,Q10758                                                                |
| 1502 | 1,2,4,5,8,2<br>5,27,32 | 3,6,7,26,2<br>8,29,30,31 | 2  | P01681,Q03191                                                                       |
| 1503 | 1,2,4,5,8,2<br>5,28,29 | 3,6,7,26,2<br>7,30,31,32 | 1  | P22006                                                                              |
| 1504 | 1,2,4,5,8,2<br>5,28,30 | 3,6,7,26,2<br>7,29,31,32 | 3  | Q6IFU8,Q6IMF3,Q6P6Q2                                                                |
| 1505 | 1,2,4,5,8,2<br>5,28,31 | 3,6,7,26,2<br>7,29,30,32 | 1  | Q811M5                                                                              |
| 1506 | 1,2,4,5,8,2<br>5,28,32 | 3,6,7,26,2<br>7,29,30,31 | 2  | P01681,Q811M5                                                                       |
| 1507 | 1,2,4,5,8,2<br>5,29,30 | 3,6,7,26,2<br>7,28,31,32 | 8  | O88797,P22006,Q4FZU2,Q6IFU7,Q6IFU8,Q6IFW6,Q6IMF3,Q6P6Q2                             |
| 1508 | 1,2,4,5,8,2<br>5,29,31 | 3,6,7,26,2<br>7,28,30,32 | 0  |                                                                                     |
| 1509 | 1,2,4,5,8,2<br>5,29,32 | 3,6,7,26,2<br>7,28,30,31 | 0  |                                                                                     |
| 1510 | 1,2,4,5,8,2<br>5,30,31 | 3,6,7,26,2<br>7,28,29,32 | 5  | Q4FZU2,Q6IFU8,Q6IG05,Q6IMF3,Q6P6Q2                                                  |
| 1511 | 1,2,4,5,8,2<br>5,30,32 | 3,6,7,26,2<br>7,28,29,31 | 8  | O88797,P01681,P70549,Q4FZU2,Q6IFU8,Q6IMF3,Q6P6Q2,Q6P6R2                             |
| 1512 | 1,2,4,5,8,2<br>5,31,32 | 3,6,7,26,2<br>7,28,29,30 | 2  | P01681,Q811M5                                                                       |
| 1513 | 1,2,4,5,8,2<br>6,27,28 | 3,6,7,25,2<br>9,30,31,32 | 5  | P15399,P20762,P25809,Q10758,Q30KJ2                                                  |
| 1514 | 1,2,4,5,8,2<br>6,27,29 | 3,6,7,25,2<br>8,30,31,32 | 6  | P19223,P25809,Q10758,Q30KJ2,Q9JJ50,Q9JJS8                                           |
| 1515 | 1,2,4,5,8,2<br>6,27,30 | 3,6,7,25,2<br>8,29,31,32 | 11 | P15399,P20762,P21588,P97580,Q03191,Q10758,Q30KJ2,Q6IFU8,Q6IG05,Q6IMF3,Q6P6Q2        |
| 1516 | 1,2,4,5,8,2<br>6,27,31 | 3,6,7,25,2<br>8,29,30,32 | 4  | P23739,Q03191,Q10758,Q30KJ2                                                         |
| 1517 | 1,2,4,5,8,2<br>6,27,32 | 3,6,7,25,2<br>8,29,30,31 | 3  | P15399,Q03191,Q30KJ2                                                                |
| 1518 | 1,2,4,5,8,2<br>6,28,29 | 3,6,7,25,2<br>7,30,31,32 | 0  |                                                                                     |
| 1519 | 1,2,4,5,8,2<br>6,28,30 | 3,6,7,25,2<br>7,29,31,32 | 2  | P20762,Q6P6Q2                                                                       |

|      |                        |                          |                                                                                               |
|------|------------------------|--------------------------|-----------------------------------------------------------------------------------------------|
| 1520 | 1,2,4,5,8,2<br>6,28,31 | 3,6,7,25,2<br>7,29,30,32 | 0                                                                                             |
| 1521 | 1,2,4,5,8,2<br>6,28,32 | 3,6,7,25,2<br>7,29,30,31 | 1 O54728                                                                                      |
| 1522 | 1,2,4,5,8,2<br>6,29,30 | 3,6,7,25,2<br>7,28,31,32 | 4 Q5RJR2,Q6IFU8,Q6IMF3,Q6P6Q2                                                                 |
| 1523 | 1,2,4,5,8,2<br>6,29,31 | 3,6,7,25,2<br>7,28,30,32 | 1 Q5RJR2                                                                                      |
| 1524 | 1,2,4,5,8,2<br>6,29,32 | 3,6,7,25,2<br>7,28,30,31 | 0                                                                                             |
| 1525 | 1,2,4,5,8,2<br>6,30,31 | 3,6,7,25,2<br>7,28,29,32 | 4 Q5RJR2,Q6IFU8,Q6IMF3,Q6P6Q2                                                                 |
| 1526 | 1,2,4,5,8,2<br>6,30,32 | 3,6,7,25,2<br>7,28,29,31 | 2 P05539,Q6P6Q2                                                                               |
| 1527 | 1,2,4,5,8,2<br>6,31,32 | 3,6,7,25,2<br>7,28,29,30 | 1 O54728                                                                                      |
| 1528 | 1,2,4,5,8,2<br>7,28,29 | 3,6,7,25,2<br>6,30,31,32 | 3 P25809,Q10758,Q812E4                                                                        |
| 1529 | 1,2,4,5,8,2<br>7,28,30 | 3,6,7,25,2<br>6,29,31,32 | 9 P19218,P70549,Q03191,Q10758,Q6IFU7,Q6IFU8,Q6IG05,Q6IMF3,Q6P6Q2                              |
| 1530 | 1,2,4,5,8,2<br>7,28,31 | 3,6,7,25,2<br>6,29,30,32 | 3 P23739,Q03191,Q10758                                                                        |
| 1531 | 1,2,4,5,8,2<br>7,28,32 | 3,6,7,25,2<br>6,29,30,31 | 3 Q03191,Q10758,Q6AYR9                                                                        |
| 1532 | 1,2,4,5,8,2<br>7,29,30 | 3,6,7,25,2<br>6,28,31,32 | 13 P00731,P19218,P19223,Q03191,Q10758,Q4FZU2,Q6IFU7,Q6IFU8,Q6IFW6,Q6IG02,Q6IG05,Q6IMF3,Q6P6Q2 |
| 1533 | 1,2,4,5,8,2<br>7,29,31 | 3,6,7,25,2<br>6,28,30,32 | 4 P00731,P19223,Q03191,Q10758                                                                 |
| 1534 | 1,2,4,5,8,2<br>7,29,32 | 3,6,7,25,2<br>6,28,30,31 | 2 Q03191,Q10758                                                                               |
| 1535 | 1,2,4,5,8,2<br>7,30,31 | 3,6,7,25,2<br>6,28,29,32 | 9 P00731,P23739,Q03191,Q10758,Q4FZU2,Q6IFU8,Q6IG05,Q6IMF3,Q6P6Q2                              |
| 1536 | 1,2,4,5,8,2<br>7,30,32 | 3,6,7,25,2<br>6,28,29,31 | 10 P19218,P70549,Q03191,Q10758,Q4FZU2,Q6IFU7,Q6IFU8,Q6IG05,Q6IMF3,Q6P6Q2                      |
| 1537 | 1,2,4,5,8,2<br>7,31,32 | 3,6,7,25,2<br>6,28,29,30 | 3 P23739,Q03191,Q10758                                                                        |
| 1538 | 1,2,4,5,8,2<br>8,29,30 | 3,6,7,25,2<br>6,27,31,32 | 3 Q6IFU8,Q6IMF3,Q6P6Q2                                                                        |
| 1539 | 1,2,4,5,8,2<br>8,29,31 | 3,6,7,25,2<br>6,27,30,32 | 0                                                                                             |

|      |                         |                          |                                                           |
|------|-------------------------|--------------------------|-----------------------------------------------------------|
| 1540 | 1,2,4,5,8,2<br>8,29,32  | 3,6,7,25,2<br>6,27,30,31 | 0                                                         |
| 1541 | 1,2,4,5,8,2<br>8,30,31  | 3,6,7,25,2<br>6,27,29,32 | 2 Q6IMF3,Q6P6Q2                                           |
| 1542 | 1,2,4,5,8,2<br>8,30,32  | 3,6,7,25,2<br>6,27,29,31 | 3 P70549,Q6IMF3,Q6P6Q2                                    |
| 1543 | 1,2,4,5,8,2<br>8,31,32  | 3,6,7,25,2<br>6,27,29,30 | 1 Q811M5                                                  |
| 1544 | 1,2,4,5,8,2<br>9,30,31  | 3,6,7,25,2<br>6,27,28,32 | 5 P63081,Q5RJR2,Q6IFU8,Q6IMF3,Q6P6Q2                      |
| 1545 | 1,2,4,5,8,2<br>9,30,32  | 3,6,7,25,2<br>6,27,28,31 | 4 O88797,Q6IFU8,Q6IMF3,Q6P6Q2                             |
| 1546 | 1,2,4,5,8,2<br>9,31,32  | 3,6,7,25,2<br>6,27,28,30 | 0                                                         |
| 1547 | 1,2,4,5,8,3<br>0,31,32  | 3,6,7,25,2<br>6,27,28,29 | 8 P05539,P26342,P63081,P70549,Q6IFU8,Q6IMF3,Q6P6Q2,Q6P6R2 |
| 1548 | 1,2,4,5,25,<br>26,27,28 | 3,6,7,8,29,<br>30,31,32  | 2 P35280,Q03191                                           |
| 1549 | 1,2,4,5,25,<br>26,27,29 | 3,6,7,8,28,<br>30,31,32  | 5 O89117,P22006,P35280,Q03191,Q9QZK9                      |
| 1550 | 1,2,4,5,25,<br>26,27,30 | 3,6,7,8,28,<br>29,31,32  | 2 P21588,Q03191                                           |
| 1551 | 1,2,4,5,25,<br>26,27,31 | 3,6,7,8,28,<br>29,30,32  | 4 P23739,P35280,Q03191,Q9QYP1                             |
| 1552 | 1,2,4,5,25,<br>26,27,32 | 3,6,7,8,28,<br>29,30,31  | 1 Q03191                                                  |
| 1553 | 1,2,4,5,25,<br>26,28,29 | 3,6,7,8,27,<br>30,31,32  | 2 P35280,Q9QZK9                                           |
| 1554 | 1,2,4,5,25,<br>26,28,30 | 3,6,7,8,27,<br>29,31,32  | 0                                                         |
| 1555 | 1,2,4,5,25,<br>26,28,31 | 3,6,7,8,27,<br>29,30,32  | 1 P35280                                                  |
| 1556 | 1,2,4,5,25,<br>26,28,32 | 3,6,7,8,27,<br>29,30,31  | 0                                                         |
| 1557 | 1,2,4,5,25,<br>26,29,30 | 3,6,7,8,27,<br>28,31,32  | 2 P22006,Q9QZK9                                           |
| 1558 | 1,2,4,5,25,<br>26,29,31 | 3,6,7,8,27,<br>28,30,32  | 2 O70417,P35280                                           |
| 1559 | 1,2,4,5,25,<br>26,29,32 | 3,6,7,8,27,<br>28,30,31  | 1 Q9QZK9                                                  |

|      |                                              |                                      |
|------|----------------------------------------------|--------------------------------------|
| 1560 | 1,2,4,5,25, 3,6,7,8,27,<br>26,30,31 28,29,32 | 5 Q63617,Q6AYR9,Q812E4,Q8CFN2,Q9EQS0 |
| 1561 | 1,2,4,5,25, 3,6,7,8,27,<br>26,30,32 28,29,31 | 4 D3ZUC6,P00507,Q9EQS0,Q9R168        |
| 1562 | 1,2,4,5,25, 3,6,7,8,27,<br>26,31,32 28,29,30 | 2 P00507,Q9EQS0                      |
| 1563 | 1,2,4,5,25, 3,6,7,8,26,<br>27,28,29 30,31,32 | 3 O89117,P35280,Q03191               |
| 1564 | 1,2,4,5,25, 3,6,7,8,26,<br>27,28,30 29,31,32 | 2 P70549,Q03191                      |
| 1565 | 1,2,4,5,25, 3,6,7,8,26,<br>27,28,31 29,30,32 | 3 P23739,P35280,Q03191               |
| 1566 | 1,2,4,5,25, 3,6,7,8,26,<br>27,28,32 29,30,31 | 2 Q03191,Q62761;Q62762;Q62763        |
| 1567 | 1,2,4,5,25, 3,6,7,8,26,<br>27,29,30 28,31,32 | 2 Q03191,Q923V8                      |
| 1568 | 1,2,4,5,25, 3,6,7,8,26,<br>27,29,31 28,30,32 | 2 P35280,Q03191                      |
| 1569 | 1,2,4,5,25, 3,6,7,8,26,<br>27,29,32 28,30,31 | 1 Q03191                             |
| 1570 | 1,2,4,5,25, 3,6,7,8,26,<br>27,30,31 28,29,32 | 4 P23739,Q03191,Q6P6R2,Q9QYP1        |
| 1571 | 1,2,4,5,25, 3,6,7,8,26,<br>27,30,32 28,29,31 | 4 P70549,Q03191,Q6P6R2,Q9QX74        |
| 1572 | 1,2,4,5,25, 3,6,7,8,26,<br>27,31,32 28,29,30 | 4 P23739,Q03191,Q6P6R2,Q9QYP1        |
| 1573 | 1,2,4,5,25, 3,6,7,8,26,<br>28,29,30 27,31,32 | 0                                    |
| 1574 | 1,2,4,5,25, 3,6,7,8,26,<br>28,29,31 27,30,32 | 1 P35280                             |
| 1575 | 1,2,4,5,25, 3,6,7,8,26,<br>28,29,32 27,30,31 | 0                                    |
| 1576 | 1,2,4,5,25, 3,6,7,8,26,<br>28,30,31 27,29,32 | 0                                    |
| 1577 | 1,2,4,5,25, 3,6,7,8,26,<br>28,30,32 27,29,31 | 3 P70549,Q9QX74,Q9R168               |
| 1578 | 1,2,4,5,25, 3,6,7,8,26,<br>28,31,32 27,29,30 | 1 Q811M5                             |
| 1579 | 1,2,4,5,25, 3,6,7,8,26,<br>29,30,31 27,28,32 | 2 P07150,Q9QWN8                      |

|      |                                              |                                                           |
|------|----------------------------------------------|-----------------------------------------------------------|
| 1580 | 1,2,4,5,25, 3,6,7,8,26,<br>29,30,32 27,28,31 | 3 Q62894,Q9R168,Q9WTT6                                    |
| 1581 | 1,2,4,5,25, 3,6,7,8,26,<br>29,31,32 27,28,30 | 1 O70417                                                  |
| 1582 | 1,2,4,5,25, 3,6,7,8,26,<br>30,31,32 27,28,29 | 8 D3ZUC6,P26342,P63081,P70549,Q6P6R2,Q9QX74,Q9QYP1,Q9WTT6 |
| 1583 | 1,2,4,5,26, 3,6,7,8,25,<br>27,28,29 30,31,32 | 3 P02625,P21588,P35280                                    |
| 1584 | 1,2,4,5,26, 3,6,7,8,25,<br>27,28,30 29,31,32 | 2 P21588,Q03191                                           |
| 1585 | 1,2,4,5,26, 3,6,7,8,25,<br>27,28,31 29,30,32 | 2 P35280,Q03191                                           |
| 1586 | 1,2,4,5,26, 3,6,7,8,25,<br>27,28,32 29,30,31 | 2 Q03191,Q62761;Q62762;Q62763                             |
| 1587 | 1,2,4,5,26, 3,6,7,8,25,<br>27,29,30 28,31,32 | 3 P21588,Q03191,Q923V8                                    |
| 1588 | 1,2,4,5,26, 3,6,7,8,25,<br>27,29,31 28,30,32 | 3 O70417,P35280,Q03191                                    |
| 1589 | 1,2,4,5,26, 3,6,7,8,25,<br>27,29,32 28,30,31 | 3 O70417,Q03191,Q9JJ50                                    |
| 1590 | 1,2,4,5,26, 3,6,7,8,25,<br>27,30,31 28,29,32 | 1 Q03191                                                  |
| 1591 | 1,2,4,5,26, 3,6,7,8,25,<br>27,30,32 28,29,31 | 2 P70549,Q03191                                           |
| 1592 | 1,2,4,5,26, 3,6,7,8,25,<br>27,31,32 28,29,30 | 3 O70417,P23739,Q03191                                    |
| 1593 | 1,2,4,5,26, 3,6,7,8,25,<br>28,29,30 27,31,32 | 1 P21588                                                  |
| 1594 | 1,2,4,5,26, 3,6,7,8,25,<br>28,29,31 27,30,32 | 2 O70417,P35280                                           |
| 1595 | 1,2,4,5,26, 3,6,7,8,25,<br>28,29,32 27,30,31 | 1 O70417                                                  |
| 1596 | 1,2,4,5,26, 3,6,7,8,25,<br>28,30,31 27,29,32 | 0                                                         |
| 1597 | 1,2,4,5,26, 3,6,7,8,25,<br>28,30,32 27,29,31 | 1 Q9R168                                                  |
| 1598 | 1,2,4,5,26, 3,6,7,8,25,<br>28,31,32 27,29,30 | 2 O54728,O70417                                           |
| 1599 | 1,2,4,5,26, 3,6,7,8,25,<br>29,30,31 27,28,32 | 1 P36860                                                  |

|      |                                                  |                                                                          |
|------|--------------------------------------------------|--------------------------------------------------------------------------|
| 1600 | 1,2,4,5,26, 3,6,7,8,25,<br>29,30,32 27,28,31     | 1 P36860                                                                 |
| 1601 | 1,2,4,5,26, 3,6,7,8,25,<br>29,31,32 27,28,30     | 3 O70417,P36860,Q5QE79                                                   |
| 1602 | 1,2,4,5,26, 3,6,7,8,25,<br>30,31,32 27,28,29     | 6 P26342,P36860,P63081,Q4G075,Q5QE79,Q9EQS0                              |
| 1603 | 1,2,4,5,27, 3,6,7,8,25,<br>28,29,30 26,31,32     | 1 P21588                                                                 |
| 1604 | 1,2,4,5,27, 3,6,7,8,25,<br>28,29,31 26,30,32     | 3 O70417,P35280,Q03191                                                   |
| 1605 | 1,2,4,5,27, 3,6,7,8,25,<br>28,29,32 26,30,31     | 2 Q03191,Q62761;Q62762;Q62763                                            |
| 1606 | 1,2,4,5,27, 3,6,7,8,25,<br>28,30,31 26,29,32     | 1 Q03191                                                                 |
| 1607 | 1,2,4,5,27, 3,6,7,8,25,<br>28,30,32 26,29,31     | 3 P70549,Q03191,Q9QX74                                                   |
| 1608 | 1,2,4,5,27, 3,6,7,8,25,<br>28,31,32 26,29,30     | 4 P23739,P80299,Q03191,Q62761;Q62762;Q62763                              |
| 1609 | 1,2,4,5,27, 3,6,7,8,25,<br>29,30,31 26,28,32     | 1 Q03191                                                                 |
| 1610 | 1,2,4,5,27, 3,6,7,8,25,<br>29,30,32 26,28,31     | 2 Q03191,Q923V8                                                          |
| 1611 | 1,2,4,5,27, 3,6,7,8,25,<br>29,31,32 26,28,30     | 3 O70417,P80299,Q03191                                                   |
| 1612 | 1,2,4,5,27, 3,6,7,8,25,<br>30,31,32 26,28,29     | 9 P23739,P36860,P70549,P80299,Q03191,Q6P6R2,Q9QX74,Q9QYP1,Q9WTT6         |
| 1613 | 1,2,4,5,28, 3,6,7,8,25,<br>29,30,31 26,27,32     | 0                                                                        |
| 1614 | 1,2,4,5,28, 3,6,7,8,25,<br>29,30,32 26,27,31     | 1 Q62894                                                                 |
| 1615 | 1,2,4,5,28, 3,6,7,8,25,<br>29,31,32 26,27,30     | 2 O70417,P80299                                                          |
| 1616 | 1,2,4,5,28, 3,6,7,8,25,<br>30,31,32 26,27,29     | 4 P63081,P70549,Q9QX74,Q9WTT6                                            |
| 1617 | 1,2,4,5,29, 3,6,7,8,25,<br>30,31,32 26,27,28     | 7 P07150,P26342,P36860,P50115,P63081,P80299,Q9WTT6                       |
| 1618 | 1,2,4,6,7,8 3,5,27,28,<br>,25,26 29,30,31,3<br>2 | 10 G3V686,O54858,P02631,P06911,P08649,P12020,P20762,P97580,Q30KJ2,Q9WVH8 |



|      |                       |                               |    |                                                                                                                                                                      |
|------|-----------------------|-------------------------------|----|----------------------------------------------------------------------------------------------------------------------------------------------------------------------|
| 1619 | 1,2,4,6,7,8<br>,25,27 | 3,5,26,28,<br>29,30,31,3<br>2 | 15 | P02631,P06911,P11598,P12020,P15399,P19629,P22273,P22282,P50115,P97580,Q30KJ2,Q4G07<br>5,Q5GRG2,Q66H69,Q99041                                                         |
| 1620 | 1,2,4,6,7,8<br>,25,28 | 3,5,26,27,<br>29,30,31,3<br>2 | 12 | P02631,P06911,P08649,P11598,P12020,P19629,P22273,Q5GRG2,Q63617,Q99041,Q9JI85,Q9Q<br>W07                                                                              |
| 1621 | 1,2,4,6,7,8<br>,25,29 | 3,5,26,27,<br>28,30,31,3<br>2 | 6  | P02631,P06911,P12020,P48032,P62804,Q5GRG2                                                                                                                            |
| 1622 | 1,2,4,6,7,8<br>,25,30 | 3,5,26,27,<br>28,29,31,3<br>2 | 9  | G3V686,O54858,P02631,P06911,P12020,P97580,Q30KJ2,Q5GRG2,Q99041                                                                                                       |
| 1623 | 1,2,4,6,7,8<br>,25,31 | 3,5,26,27,<br>28,29,30,3<br>2 | 8  | G3V686,O54858,P02631,P06911,P12020,Q5GRG2,Q63532,Q9WVH8                                                                                                              |
| 1624 | 1,2,4,6,7,8<br>,25,32 | 3,5,26,27,<br>28,29,30,3<br>1 | 10 | G3V686,O54858,O55004,P02454,P02631,P06911,P11598,P12020,P13432,Q5GRG2                                                                                                |
| 1625 | 1,2,4,6,7,8<br>,26,27 | 3,5,25,28,<br>29,30,31,3<br>2 | 18 | P02631,P06911,P11598,P15399,P17559,P20762,P22273,P22282,P50115,P50116,P50280,P97580<br>,Q30KJ2,Q4G075,Q5BJY9,Q62894,Q66H69,Q99041                                    |
| 1626 | 1,2,4,6,7,8<br>,26,28 | 3,5,25,27,<br>29,30,31,3<br>2 | 20 | P00762,P02631,P06761,P06911,P07150,P08649,P11598,P12020,P15399,P20762,P21674,P22273<br>,P22282,P97580,Q30KJ2,Q63617,Q99041,Q9JI85,Q9QW07,Q9Z1F2                      |
| 1627 | 1,2,4,6,7,8<br>,26,29 | 3,5,25,27,<br>28,30,31,3<br>2 | 12 | P02631,P06911,P11598,P12020,P20762,P21674,P22273,P62804,P97580,Q30KJ2,Q99041,Q9QX<br>74                                                                              |
| 1628 | 1,2,4,6,7,8<br>,26,30 | 3,5,25,27,<br>28,29,31,3<br>2 | 8  | G3V686,P02631,P06911,P20762,P97580,Q30KJ2,Q80WL1,Q99041                                                                                                              |
| 1629 | 1,2,4,6,7,8<br>,26,31 | 3,5,25,27,<br>28,29,30,3<br>2 | 11 | O54858,P06911,P11598,P12020,P20762,P20766,P57113,P97580,Q30KJ2,Q63532,Q9WVH8                                                                                         |
| 1630 | 1,2,4,6,7,8<br>,26,32 | 3,5,25,27,<br>28,29,30,3<br>1 | 10 | O55004,P02454,P02631,P06911,P11598,P18418,P20762,P97580,Q30KJ2,Q99041                                                                                                |
| 1631 | 1,2,4,6,7,8<br>,27,28 | 3,5,25,26,<br>29,30,31,3<br>2 | 23 | P02631,P06761,P06911,P11598,P12020,P15399,P19218,P22273,P22282,P22283,P50115,P97580<br>,Q00715,Q10758,Q30KJ2,Q4G075,Q5GRG2,Q63617,Q66H69,Q68FX1,Q99041,Q9JI85,Q9QW07 |

|      |                       |                               |    |                                                                                                                                                 |
|------|-----------------------|-------------------------------|----|-------------------------------------------------------------------------------------------------------------------------------------------------|
| 1632 | 1,2,4,6,7,8<br>,27,29 | 3,5,25,26,<br>28,30,31,3<br>2 | 20 | P02631,P06761,P06911,P11598,P12020,P15399,P19223,P22273,P22282,P25809,P62804,P97580<br>,Q00715,Q10758,Q30KJ2,Q4G075,Q63617,Q66H69,Q99041,Q9JI85 |
| 1633 | 1,2,4,6,7,8<br>,27,30 | 3,5,25,26,<br>28,29,31,3<br>2 | 15 | P02631,P06911,P11598,P15399,P19218,P19223,P22273,P22282,P49744,P97580,Q10758,Q30KJ<br>2,Q66H69,Q80WL1,Q99041                                    |
| 1634 | 1,2,4,6,7,8<br>,27,31 | 3,5,25,26,<br>28,29,30,3<br>2 | 15 | P06911,P11598,P12020,P15399,P22273,P22282,P80299,P97580,Q10758,Q30KJ2,Q5GRG2,Q628<br>94,Q63532,Q66H69,Q99041                                    |
| 1635 | 1,2,4,6,7,8<br>,27,32 | 3,5,25,26,<br>28,29,30,3<br>1 | 15 | O55004,P00714,P02631,P06911,P11598,P15399,P22273,P22282,P50280,P97580,P98166,Q30KJ<br>2,Q66H69,Q99041,Q9JI85                                    |
| 1636 | 1,2,4,6,7,8<br>,28,29 | 3,5,25,26,<br>27,30,31,3<br>2 | 18 | P00762,P02631,P06761,P06911,P11598,P12020,P21674,P22273,P22282,P22283,P62804,Q0071<br>5,Q5GRG2,Q63493,Q63617,Q99041,Q9JI85,Q9QW07               |
| 1637 | 1,2,4,6,7,8<br>,28,30 | 3,5,25,26,<br>27,29,31,3<br>2 | 13 | P02631,P06911,P11598,P12020,P19218,P62804,Q30KJ2,Q5GRG2,Q63617,Q80WL1,Q99041,Q9J<br>I85,Q9QW07                                                  |
| 1638 | 1,2,4,6,7,8<br>,28,31 | 3,5,25,26,<br>27,29,30,3<br>2 | 11 | P02631,P06911,P11598,P12020,P21674,P82471,Q5GRG2,Q63532,Q63617,Q99041,Q9JI85                                                                    |
| 1639 | 1,2,4,6,7,8<br>,28,32 | 3,5,25,26,<br>27,29,30,3<br>1 | 14 | O55004,P02454,P02631,P06911,P08723,P11598,P12020,P22282,Q5GRG2,Q63532,Q63617,Q99<br>041,Q9JI85,Q9QW07                                           |
| 1640 | 1,2,4,6,7,8<br>,29,30 | 3,5,25,26,<br>27,28,31,3<br>2 | 9  | P02631,P06911,P12020,P62804,P97580,Q30KJ2,Q5RJR2,Q80WL1,Q99041                                                                                  |
| 1641 | 1,2,4,6,7,8<br>,29,31 | 3,5,25,26,<br>27,28,30,3<br>2 | 9  | P06911,P11598,P12020,P21674,P80299,P82471,Q5GRG2,Q5RJR2,Q63532                                                                                  |
| 1642 | 1,2,4,6,7,8<br>,29,32 | 3,5,25,26,<br>27,28,30,3<br>1 | 8  | O55004,P00714,P02631,P06911,P11598,P12020,Q99041,Q9JI85                                                                                         |
| 1643 | 1,2,4,6,7,8<br>,30,31 | 3,5,25,26,<br>27,28,29,3<br>2 | 9  | O54858,P06911,P12020,P15999,P26342,Q30KJ2,Q5RJR2,Q63532,Q99041                                                                                  |
| 1644 | 1,2,4,6,7,8<br>,30,32 | 3,5,25,26,<br>27,28,29,3<br>1 | 6  | O55004,P02631,P06911,P15999,P26342,Q99041                                                                                                       |

|      |                        |                               |    |                                                                              |
|------|------------------------|-------------------------------|----|------------------------------------------------------------------------------|
| 1645 | 1,2,4,6,7,8<br>,31,32  | 3,5,25,26,<br>27,28,29,3<br>0 | 11 | O54858,O55004,P02631,P06911,P11598,P12020,P15999,P26342,P80299,P82471,Q63532 |
| 1646 | 1,2,4,6,7,2<br>5,26,27 | 3,5,8,28,2<br>9,30,31,32      | 1  | P21588                                                                       |
| 1647 | 1,2,4,6,7,2<br>5,26,28 | 3,5,8,27,2<br>9,30,31,32      | 2  | P11598,Q9WVH8                                                                |
| 1648 | 1,2,4,6,7,2<br>5,26,29 | 3,5,8,27,2<br>8,30,31,32      | 1  | Q9WVH8                                                                       |
| 1649 | 1,2,4,6,7,2<br>5,26,30 | 3,5,8,27,2<br>8,29,31,32      | 4  | G3V686,Q80WL1,Q9EQS0,Q9R168                                                  |
| 1650 | 1,2,4,6,7,2<br>5,26,31 | 3,5,8,27,2<br>8,29,30,32      | 2  | Q9EQS0,Q9WVH8                                                                |
| 1651 | 1,2,4,6,7,2<br>5,26,32 | 3,5,8,27,2<br>8,29,30,31      | 3  | Q9EQS0,Q9R168,Q9WVH8                                                         |
| 1652 | 1,2,4,6,7,2<br>5,27,28 | 3,5,8,26,2<br>9,30,31,32      | 1  | P11598                                                                       |
| 1653 | 1,2,4,6,7,2<br>5,27,29 | 3,5,8,26,2<br>8,30,31,32      | 1  | P19223                                                                       |
| 1654 | 1,2,4,6,7,2<br>5,27,30 | 3,5,8,26,2<br>8,29,31,32      | 1  | Q80WL1                                                                       |
| 1655 | 1,2,4,6,7,2<br>5,27,31 | 3,5,8,26,2<br>8,29,30,32      | 2  | P80299,Q9QYP1                                                                |
| 1656 | 1,2,4,6,7,2<br>5,27,32 | 3,5,8,26,2<br>8,29,30,31      | 0  |                                                                              |
| 1657 | 1,2,4,6,7,2<br>5,28,29 | 3,5,8,26,2<br>7,30,31,32      | 3  | P00762,P11598,Q63617                                                         |
| 1658 | 1,2,4,6,7,2<br>5,28,30 | 3,5,8,26,2<br>7,29,31,32      | 3  | Q62975,Q80WL1,Q9R168                                                         |
| 1659 | 1,2,4,6,7,2<br>5,28,31 | 3,5,8,26,2<br>7,29,30,32      | 1  | Q5GRG2                                                                       |
| 1660 | 1,2,4,6,7,2<br>5,28,32 | 3,5,8,26,2<br>7,29,30,31      | 3  | P11598,Q62975,Q9R168                                                         |
| 1661 | 1,2,4,6,7,2<br>5,29,30 | 3,5,8,26,2<br>7,28,31,32      | 3  | Q80WL1,Q9QWN8,Q9R168                                                         |
| 1662 | 1,2,4,6,7,2<br>5,29,31 | 3,5,8,26,2<br>7,28,30,32      | 3  | B1H234,P80299,Q9QWN8                                                         |
| 1663 | 1,2,4,6,7,2<br>5,29,32 | 3,5,8,26,2<br>7,28,30,31      | 2  | Q6AYR8,Q9R168                                                                |
| 1664 | 1,2,4,6,7,2<br>5,30,31 | 3,5,8,26,2<br>7,28,29,32      | 4  | P26342,Q9EQS0,Q9QWN8,Q9QYP1                                                  |

|      |                        |                          |   |                                           |
|------|------------------------|--------------------------|---|-------------------------------------------|
| 1665 | 1,2,4,6,7,2<br>5,30,32 | 3,5,8,26,2<br>7,28,29,31 | 4 | P26342,Q6P6R2,Q9EQS0,Q9R168               |
| 1666 | 1,2,4,6,7,2<br>5,31,32 | 3,5,8,26,2<br>7,28,29,30 | 3 | P26342,P80299,Q9WVH8                      |
| 1667 | 1,2,4,6,7,2<br>6,27,28 | 3,5,8,25,2<br>9,30,31,32 | 3 | P11598,P21588,Q63617                      |
| 1668 | 1,2,4,6,7,2<br>6,27,29 | 3,5,8,25,2<br>8,30,31,32 | 4 | P11598,P19223,P21588,Q80WL1               |
| 1669 | 1,2,4,6,7,2<br>6,27,30 | 3,5,8,25,2<br>8,29,31,32 | 2 | P21588,Q80WL1                             |
| 1670 | 1,2,4,6,7,2<br>6,27,31 | 3,5,8,25,2<br>8,29,30,32 | 2 | P80299,Q62894                             |
| 1671 | 1,2,4,6,7,2<br>6,27,32 | 3,5,8,25,2<br>8,29,30,31 | 1 | P11598                                    |
| 1672 | 1,2,4,6,7,2<br>6,28,29 | 3,5,8,25,2<br>7,30,31,32 | 6 | P00762,P01835,P11598,P14173,P21674,Q63617 |
| 1673 | 1,2,4,6,7,2<br>6,28,30 | 3,5,8,25,2<br>7,29,31,32 | 5 | P00762,P11598,P21588,Q80WL1,Q9R168        |
| 1674 | 1,2,4,6,7,2<br>6,28,31 | 3,5,8,25,2<br>7,29,30,32 | 2 | P00762,P11598                             |
| 1675 | 1,2,4,6,7,2<br>6,28,32 | 3,5,8,25,2<br>7,29,30,31 | 4 | P11598,P14173,Q5M872,Q9R168               |
| 1676 | 1,2,4,6,7,2<br>6,29,30 | 3,5,8,25,2<br>7,28,31,32 | 5 | B1H234,P01835,P21588,Q80WL1,Q9R168        |
| 1677 | 1,2,4,6,7,2<br>6,29,31 | 3,5,8,25,2<br>7,28,30,32 | 4 | B1H234,P00762,P01835,P80299               |
| 1678 | 1,2,4,6,7,2<br>6,29,32 | 3,5,8,25,2<br>7,28,30,31 | 5 | P01835,P06866,P11598,P14173,Q9R168        |
| 1679 | 1,2,4,6,7,2<br>6,30,31 | 3,5,8,25,2<br>7,28,29,32 | 3 | P36860,Q80WL1,Q9EQS0                      |
| 1680 | 1,2,4,6,7,2<br>6,30,32 | 3,5,8,25,2<br>7,28,29,31 | 4 | P26342,Q80WL1,Q9EQS0,Q9R168               |
| 1681 | 1,2,4,6,7,2<br>6,31,32 | 3,5,8,25,2<br>7,28,29,30 | 5 | P14173,P22006,P26342,P80299,Q9WVH8        |
| 1682 | 1,2,4,6,7,2<br>7,28,29 | 3,5,8,25,2<br>6,30,31,32 | 6 | P11598,P22283,P80299,Q00715,Q63617,Q9JI85 |
| 1683 | 1,2,4,6,7,2<br>7,28,30 | 3,5,8,25,2<br>6,29,31,32 | 4 | P11598,P19218,P21588,Q80WL1               |
| 1684 | 1,2,4,6,7,2<br>7,28,31 | 3,5,8,25,2<br>6,29,30,32 | 4 | O88797,P11598,P80299,Q63617               |

|      |                        |                          |    |                                                                       |
|------|------------------------|--------------------------|----|-----------------------------------------------------------------------|
| 1685 | 1,2,4,6,7,2<br>7,28,32 | 3,5,8,25,2<br>6,29,30,31 | 8  | P05964,P11598,P22283,P80299,Q62761;Q62762;Q62763,Q63617,Q6AYR9,Q9JI85 |
| 1686 | 1,2,4,6,7,2<br>7,29,30 | 3,5,8,25,2<br>6,28,31,32 | 5  | B1H234,P19223,P21588,P80299,Q80WL1                                    |
| 1687 | 1,2,4,6,7,2<br>7,29,31 | 3,5,8,25,2<br>6,28,30,32 | 3  | B1H234,P19223,P80299                                                  |
| 1688 | 1,2,4,6,7,2<br>7,29,32 | 3,5,8,25,2<br>6,28,30,31 | 4  | P00714,P11598,P19223,P80299                                           |
| 1689 | 1,2,4,6,7,2<br>7,30,31 | 3,5,8,25,2<br>6,28,29,32 | 4  | P80299,Q80WL1,Q9QYP1,Q9Z0J6                                           |
| 1690 | 1,2,4,6,7,2<br>7,30,32 | 3,5,8,25,2<br>6,28,29,31 | 4  | P00714,P80299,Q80WL1,Q9R168                                           |
| 1691 | 1,2,4,6,7,2<br>7,31,32 | 3,5,8,25,2<br>6,28,29,30 | 6  | P00714,P11598,P22006,P80299,Q9QYP1,Q9Z0J6                             |
| 1692 | 1,2,4,6,7,2<br>8,29,30 | 3,5,8,25,2<br>6,27,31,32 | 8  | B1H234,P00762,P01835,P11598,P17046,P21674,Q63617,Q80WL1               |
| 1693 | 1,2,4,6,7,2<br>8,29,31 | 3,5,8,25,2<br>6,27,30,32 | 7  | B1H234,P00762,P01835,P11598,P21674,P80299,Q63617                      |
| 1694 | 1,2,4,6,7,2<br>8,29,32 | 3,5,8,25,2<br>6,27,30,31 | 8  | P01835,P07647,P11598,P14173,P80299,P81556,Q63617,Q9JI85               |
| 1695 | 1,2,4,6,7,2<br>8,30,31 | 3,5,8,25,2<br>6,27,29,32 | 4  | P00762,P80299,Q63532,Q80WL1                                           |
| 1696 | 1,2,4,6,7,2<br>8,30,32 | 3,5,8,25,2<br>6,27,29,31 | 4  | P11598,P26342,Q80WL1,Q9R168                                           |
| 1697 | 1,2,4,6,7,2<br>8,31,32 | 3,5,8,25,2<br>6,27,29,30 | 5  | P11598,P14173,P22006,P80299,Q63532                                    |
| 1698 | 1,2,4,6,7,2<br>9,30,31 | 3,5,8,25,2<br>6,27,28,32 | 8  | B1H234,P01835,P17046,P26342,P36860,P80299,Q80WL1,Q9QWN8               |
| 1699 | 1,2,4,6,7,2<br>9,30,32 | 3,5,8,25,2<br>6,27,28,31 | 10 | B1H234,O55145,P00714,P01835,P17046,P26342,P36860,P80299,Q80WL1,Q9R168 |
| 1700 | 1,2,4,6,7,2<br>9,31,32 | 3,5,8,25,2<br>6,27,28,30 | 6  | B1H234,P00714,P01835,P26342,P36860,P80299                             |
| 1701 | 1,2,4,6,7,3<br>0,31,32 | 3,5,8,25,2<br>6,27,28,29 | 7  | P06760,P22006,P26342,P36860,P80299,Q63532,Q6P6R2                      |
| 1702 | 1,2,4,6,8,2<br>5,26,27 | 3,5,7,28,2<br>9,30,31,32 | 9  | G3V686,P06911,P08649,P15399,P17559,P54921,P97580,Q30KJ2,Q5BJY9        |
| 1703 | 1,2,4,6,8,2<br>5,26,28 | 3,5,7,27,2<br>9,30,31,32 | 10 | G3V686,P02631,P06911,P08649,P15399,P97580,Q30KJ2,Q5GRG2,Q9JI85,Q9QW07 |
| 1704 | 1,2,4,6,8,2<br>5,26,29 | 3,5,7,27,2<br>8,30,31,32 | 4  | P08649,P13432,P97580,Q30KJ2                                           |

|      |                        |                          |    |                                                                              |
|------|------------------------|--------------------------|----|------------------------------------------------------------------------------|
| 1705 | 1,2,4,6,8,2<br>5,26,30 | 3,5,7,27,2<br>8,29,31,32 | 7  | G3V686,P08649,P15399,P54921,P97580,Q30KJ2,Q6AY61                             |
| 1706 | 1,2,4,6,8,2<br>5,26,31 | 3,5,7,27,2<br>8,29,30,32 | 10 | G3V686,P06911,P08649,P12020,P47967,P54921,P97580,P97840,Q30KJ2,Q63532        |
| 1707 | 1,2,4,6,8,2<br>5,26,32 | 3,5,7,27,2<br>8,29,30,31 | 10 | G3V686,O55004,P00507,P08649,P13432,P15399,P97580,Q06000,Q30KJ2,Q68G31        |
| 1708 | 1,2,4,6,8,2<br>5,27,28 | 3,5,7,26,2<br>9,30,31,32 | 10 | P02631,P06911,P08649,P15399,P19629,P97580,Q10758,Q30KJ2,Q5GRG2,Q9JI85        |
| 1709 | 1,2,4,6,8,2<br>5,27,29 | 3,5,7,26,2<br>8,30,31,32 | 7  | P06911,P15399,P19223,P97580,Q10758,Q30KJ2,Q5GRG2                             |
| 1710 | 1,2,4,6,8,2<br>5,27,30 | 3,5,7,26,2<br>8,29,31,32 | 6  | P06911,P15399,P54921,P97580,Q10758,Q30KJ2                                    |
| 1711 | 1,2,4,6,8,2<br>5,27,31 | 3,5,7,26,2<br>8,29,30,32 | 9  | P06911,P12020,P15399,P54921,P97580,Q30KJ2,Q5GRG2,Q63532,Q9QYP1               |
| 1712 | 1,2,4,6,8,2<br>5,27,32 | 3,5,7,26,2<br>8,29,30,31 | 6  | P02631,P06911,P15399,P97580,P98166,Q30KJ2                                    |
| 1713 | 1,2,4,6,8,2<br>5,28,29 | 3,5,7,26,2<br>7,30,31,32 | 7  | P02631,P06911,P08649,P12020,Q5GRG2,Q9JI85,Q9QW07                             |
| 1714 | 1,2,4,6,8,2<br>5,28,30 | 3,5,7,26,2<br>7,29,31,32 | 7  | P02631,P06911,P08649,P12020,P97580,Q30KJ2,Q5GRG2                             |
| 1715 | 1,2,4,6,8,2<br>5,28,31 | 3,5,7,26,2<br>7,29,30,32 | 6  | P06911,P08649,P12020,Q5GRG2,Q63532,Q9JI85                                    |
| 1716 | 1,2,4,6,8,2<br>5,28,32 | 3,5,7,26,2<br>7,29,30,31 | 7  | P02631,P06911,P08649,Q5GRG2,Q68G31,Q9JI85,Q9QW07                             |
| 1717 | 1,2,4,6,8,2<br>5,29,30 | 3,5,7,26,2<br>7,28,31,32 | 3  | P06911,P97580,Q30KJ2                                                         |
| 1718 | 1,2,4,6,8,2<br>5,29,31 | 3,5,7,26,2<br>7,28,30,32 | 4  | P06911,P12020,Q5GRG2,Q63532                                                  |
| 1719 | 1,2,4,6,8,2<br>5,29,32 | 3,5,7,26,2<br>7,28,30,31 | 3  | P02631,P13432,Q68G31                                                         |
| 1720 | 1,2,4,6,8,2<br>5,30,31 | 3,5,7,26,2<br>7,28,29,32 | 10 | G3V686,O54858,P06911,P12020,P47967,P54921,P97840,Q30KJ2,Q5GRG2,Q63532        |
| 1721 | 1,2,4,6,8,2<br>5,30,32 | 3,5,7,26,2<br>7,28,29,31 | 5  | G3V686,P02631,P47967,Q30KJ2,Q68G31                                           |
| 1722 | 1,2,4,6,8,2<br>5,31,32 | 3,5,7,26,2<br>7,28,29,30 | 6  | P06911,P12020,P47967,P97840,Q5GRG2,Q63532                                    |
| 1723 | 1,2,4,6,8,2<br>6,27,28 | 3,5,7,25,2<br>9,30,31,32 | 11 | P08649,P15399,P17559,P20762,P22282,P50280,P97580,Q10758,Q30KJ2,Q5BJY9,Q9JI85 |
| 1724 | 1,2,4,6,8,2<br>6,27,29 | 3,5,7,25,2<br>8,30,31,32 | 5  | P15399,P19223,P97580,Q10758,Q30KJ2                                           |

|      |                        |                          |    |                                                                                            |
|------|------------------------|--------------------------|----|--------------------------------------------------------------------------------------------|
| 1725 | 1,2,4,6,8,2<br>6,27,30 | 3,5,7,25,2<br>8,29,31,32 | 6  | P15399,P20762,P21588,P97580,Q10758,Q30KJ2                                                  |
| 1726 | 1,2,4,6,8,2<br>6,27,31 | 3,5,7,25,2<br>8,29,30,32 | 6  | P15399,P54921,P97580,Q30KJ2,Q5BJY9,Q63532                                                  |
| 1727 | 1,2,4,6,8,2<br>6,27,32 | 3,5,7,25,2<br>8,29,30,31 | 4  | P15399,P50280,P97580,Q30KJ2                                                                |
| 1728 | 1,2,4,6,8,2<br>6,28,29 | 3,5,7,25,2<br>7,30,31,32 | 7  | P08649,P15399,P21674,P97580,Q30KJ2,Q9JI85,Q9QW07                                           |
| 1729 | 1,2,4,6,8,2<br>6,28,30 | 3,5,7,25,2<br>7,29,31,32 | 5  | P08649,P15399,P97580,Q30KJ2,Q9JI85                                                         |
| 1730 | 1,2,4,6,8,2<br>6,28,31 | 3,5,7,25,2<br>7,29,30,32 | 7  | P08649,P12020,P15399,Q30KJ2,Q5GRG2,Q63532,Q9JI85                                           |
| 1731 | 1,2,4,6,8,2<br>6,28,32 | 3,5,7,25,2<br>7,29,30,31 | 6  | O54728,P08649,P15399,P18418,Q30KJ2,Q9JI85                                                  |
| 1732 | 1,2,4,6,8,2<br>6,29,30 | 3,5,7,25,2<br>7,28,31,32 | 4  | P15399,P97580,Q30KJ2,Q5RJR2                                                                |
| 1733 | 1,2,4,6,8,2<br>6,29,31 | 3,5,7,25,2<br>7,28,30,32 | 3  | Q30KJ2,Q63474,Q63532                                                                       |
| 1734 | 1,2,4,6,8,2<br>6,29,32 | 3,5,7,25,2<br>7,28,30,31 | 5  | O55004,P06866,P97580,Q30KJ2,Q68G31                                                         |
| 1735 | 1,2,4,6,8,2<br>6,30,31 | 3,5,7,25,2<br>7,28,29,32 | 7  | P15399,P54921,P97580,Q30KJ2,Q5RJR2,Q63532,Q6AY61                                           |
| 1736 | 1,2,4,6,8,2<br>6,30,32 | 3,5,7,25,2<br>7,28,29,31 | 5  | P15399,P97580,Q30KJ2,Q68G31,Q99MH3                                                         |
| 1737 | 1,2,4,6,8,2<br>6,31,32 | 3,5,7,25,2<br>7,28,29,30 | 5  | O54728,O55004,P15399,Q30KJ2,Q63532                                                         |
| 1738 | 1,2,4,6,8,2<br>7,28,29 | 3,5,7,25,2<br>6,30,31,32 | 13 | P06911,P15399,P22282,P25809,P47727,P97580,Q00715,Q10758,Q30KJ2,Q5GRG2,Q6AYR9,Q812E4,Q9JI85 |
| 1739 | 1,2,4,6,8,2<br>7,28,30 | 3,5,7,25,2<br>6,29,31,32 | 7  | P15399,P19218,P97580,Q10758,Q30KJ2,Q6P6S4,Q9JI85                                           |
| 1740 | 1,2,4,6,8,2<br>7,28,31 | 3,5,7,25,2<br>6,29,30,32 | 9  | P06911,P12020,P15399,P97580,Q10758,Q30KJ2,Q5GRG2,Q63532,Q9JI85                             |
| 1741 | 1,2,4,6,8,2<br>7,28,32 | 3,5,7,25,2<br>6,29,30,31 | 10 | P15399,P22282,P50280,P97580,Q10758,Q30KJ2,Q6AYR9,Q6P6S4,Q9JI85,Q9QWN8                      |
| 1742 | 1,2,4,6,8,2<br>7,29,30 | 3,5,7,25,2<br>6,28,31,32 | 8  | O54861,P15399,P19218,P19223,P97580,Q10758,Q30KJ2,Q6IFU8                                    |
| 1743 | 1,2,4,6,8,2<br>7,29,31 | 3,5,7,25,2<br>6,28,30,32 | 8  | P12020,P15399,P19223,P97580,Q10758,Q30KJ2,Q5GRG2,Q63532                                    |
| 1744 | 1,2,4,6,8,2<br>7,29,32 | 3,5,7,25,2<br>6,28,30,31 | 6  | O54861,P15399,P97580,Q10758,Q30KJ2,Q9JI85                                                  |

|      |                         |                          |                                                    |
|------|-------------------------|--------------------------|----------------------------------------------------|
| 1745 | 1,2,4,6,8,2<br>7,30,31  | 3,5,7,25,2<br>6,28,29,32 | 6 P15399,P54921,P97580,Q10758,Q30KJ2,Q63532        |
| 1746 | 1,2,4,6,8,2<br>7,30,32  | 3,5,7,25,2<br>6,28,29,31 | 6 P15399,P19218,P97580,Q10758,Q30KJ2,Q68G31        |
| 1747 | 1,2,4,6,8,2<br>7,31,32  | 3,5,7,25,2<br>6,28,29,30 | 6 P15399,P80299,P97580,Q10758,Q30KJ2,Q63532        |
| 1748 | 1,2,4,6,8,2<br>8,29,30  | 3,5,7,25,2<br>6,27,31,32 | 2 P21674,Q9JI85                                    |
| 1749 | 1,2,4,6,8,2<br>8,29,31  | 3,5,7,25,2<br>6,27,30,32 | 7 P06911,P12020,P21674,Q5GRG2,Q63474,Q63532,Q9JI85 |
| 1750 | 1,2,4,6,8,2<br>8,29,32  | 3,5,7,25,2<br>6,27,30,31 | 3 P08723,P30120,Q9JI85                             |
| 1751 | 1,2,4,6,8,2<br>8,30,31  | 3,5,7,25,2<br>6,27,29,32 | 3 P12020,Q5GRG2,Q63532                             |
| 1752 | 1,2,4,6,8,2<br>8,30,32  | 3,5,7,25,2<br>6,27,29,31 | 2 Q68G31,Q9JI85                                    |
| 1753 | 1,2,4,6,8,2<br>8,31,32  | 3,5,7,25,2<br>6,27,29,30 | 5 P12020,P22006,Q5GRG2,Q63532,Q9JI85               |
| 1754 | 1,2,4,6,8,2<br>9,30,31  | 3,5,7,25,2<br>6,27,28,32 | 4 P12020,Q5RJR2,Q63474,Q63532                      |
| 1755 | 1,2,4,6,8,2<br>9,30,32  | 3,5,7,25,2<br>6,27,28,31 | 2 O55145,Q68G31                                    |
| 1756 | 1,2,4,6,8,2<br>9,31,32  | 3,5,7,25,2<br>6,27,28,30 | 4 P12020,P80299,Q63474,Q63532                      |
| 1757 | 1,2,4,6,8,3<br>0,31,32  | 3,5,7,25,2<br>6,27,28,29 | 5 O89117,P20646,P22006,P26342,Q63532               |
| 1758 | 1,2,4,6,25,<br>26,27,28 | 3,5,7,8,29,<br>30,31,32  | 2 P08649,P35280                                    |
| 1759 | 1,2,4,6,25,<br>26,27,29 | 3,5,7,8,28,<br>30,31,32  | 1 P35280                                           |
| 1760 | 1,2,4,6,25,<br>26,27,30 | 3,5,7,8,28,<br>29,31,32  | 3 D3ZUC6,P21588,P54921                             |
| 1761 | 1,2,4,6,25,<br>26,27,31 | 3,5,7,8,28,<br>29,30,32  | 3 P35280,P54921,Q9QYP1                             |
| 1762 | 1,2,4,6,25,<br>26,27,32 | 3,5,7,8,28,<br>29,30,31  | 1 Q06000                                           |
| 1763 | 1,2,4,6,25,<br>26,28,29 | 3,5,7,8,27,<br>30,31,32  | 1 P35280                                           |
| 1764 | 1,2,4,6,25,<br>26,28,30 | 3,5,7,8,27,<br>29,31,32  | 1 Q9EQS0                                           |



|      |                                              |                                                           |
|------|----------------------------------------------|-----------------------------------------------------------|
| 1765 | 1,2,4,6,25, 3,5,7,8,27,<br>26,28,31 29,30,32 | 1 P35280                                                  |
| 1766 | 1,2,4,6,25, 3,5,7,8,27,<br>26,28,32 29,30,31 | 2 P08649,Q68G31                                           |
| 1767 | 1,2,4,6,25, 3,5,7,8,27,<br>26,29,30 28,31,32 | 2 D3ZUC6,Q9EQS0                                           |
| 1768 | 1,2,4,6,25, 3,5,7,8,27,<br>26,29,31 28,30,32 | 1 P35280                                                  |
| 1769 | 1,2,4,6,25, 3,5,7,8,27,<br>26,29,32 28,30,31 | 2 Q68G31,Q6AYR8                                           |
| 1770 | 1,2,4,6,25, 3,5,7,8,27,<br>26,30,31 28,29,32 | 7 D3ZUC6,P06760,P47967,P54921,Q812E4,Q9EQS0,Q9QYP1        |
| 1771 | 1,2,4,6,25, 3,5,7,8,27,<br>26,30,32 28,29,31 | 8 D3ZUC6,P00507,P06760,P47967,Q06000,Q68G31,Q9EQS0,Q9R168 |
| 1772 | 1,2,4,6,25, 3,5,7,8,27,<br>26,31,32 28,29,30 | 5 D3ZUC6,P00507,P06760,P47967,Q9EQS0                      |
| 1773 | 1,2,4,6,25, 3,5,7,8,26,<br>27,28,29 30,31,32 | 1 P35280                                                  |
| 1774 | 1,2,4,6,25, 3,5,7,8,26,<br>27,28,30 29,31,32 | 1 Q9QX74                                                  |
| 1775 | 1,2,4,6,25, 3,5,7,8,26,<br>27,28,31 29,30,32 | 3 P35280,Q5GRG2,Q9QYP1                                    |
| 1776 | 1,2,4,6,25, 3,5,7,8,26,<br>27,28,32 29,30,31 | 2 Q62761;Q62762;Q62763,Q9QX74                             |
| 1777 | 1,2,4,6,25, 3,5,7,8,26,<br>27,29,30 28,31,32 | 0                                                         |
| 1778 | 1,2,4,6,25, 3,5,7,8,26,<br>27,29,31 28,30,32 | 2 P35280,Q9QYP1                                           |
| 1779 | 1,2,4,6,25, 3,5,7,8,26,<br>27,29,32 28,30,31 | 1 Q6AYR8                                                  |
| 1780 | 1,2,4,6,25, 3,5,7,8,26,<br>27,30,31 28,29,32 | 5 P06760,P47967,P54921,Q9QX74,Q9QYP1                      |
| 1781 | 1,2,4,6,25, 3,5,7,8,26,<br>27,30,32 28,29,31 | 6 D3ZUC6,P06760,Q68G31,Q6P6R2,Q9QX74,Q9WTT6               |
| 1782 | 1,2,4,6,25, 3,5,7,8,26,<br>27,31,32 28,29,30 | 5 P06760,P47967,P80299,Q9QX74,Q9QYP1                      |
| 1783 | 1,2,4,6,25, 3,5,7,8,26,<br>28,29,30 27,31,32 | 0                                                         |
| 1784 | 1,2,4,6,25, 3,5,7,8,26,<br>28,29,31 27,30,32 | 1 P35280                                                  |

|      |                                              |                                                                                 |
|------|----------------------------------------------|---------------------------------------------------------------------------------|
| 1785 | 1,2,4,6,25, 3,5,7,8,26,<br>28,29,32 27,30,31 | 2 Q68G31,Q6AYR8                                                                 |
| 1786 | 1,2,4,6,25, 3,5,7,8,26,<br>28,30,31 27,29,32 | 2 P06760,Q9QX74                                                                 |
| 1787 | 1,2,4,6,25, 3,5,7,8,26,<br>28,30,32 27,29,31 | 7 P06760,Q5PQL7,Q62975,Q68G31,Q9QX74,Q9R168,Q9WTT6                              |
| 1788 | 1,2,4,6,25, 3,5,7,8,26,<br>28,31,32 27,29,30 | 3 P06760,P22006,Q9QX74                                                          |
| 1789 | 1,2,4,6,25, 3,5,7,8,26,<br>29,30,31 27,28,32 | 4 B1H234,P47967,Q9QWN8,Q9WTT6                                                   |
| 1790 | 1,2,4,6,25, 3,5,7,8,26,<br>29,30,32 27,28,31 | 5 D3ZUC6,O55145,Q68G31,Q9R168,Q9WTT6                                            |
| 1791 | 1,2,4,6,25, 3,5,7,8,26,<br>29,31,32 27,28,30 | 3 P47967,P80299,Q9WTT6                                                          |
| 1792 | 1,2,4,6,25, 3,5,7,8,26,<br>30,31,32 27,28,29 | 11 D3ZUC6,P06760,P26342,P47967,P97840,Q4G075,Q6P6R2,Q9EQS0,Q9QX74,Q9QYP1,Q9WTT6 |
| 1793 | 1,2,4,6,26, 3,5,7,8,25,<br>27,28,29 30,31,32 | 2 P21588,P35280                                                                 |
| 1794 | 1,2,4,6,26, 3,5,7,8,25,<br>27,28,30 29,31,32 | 2 P21588,Q80WL1                                                                 |
| 1795 | 1,2,4,6,26, 3,5,7,8,25,<br>27,28,31 29,30,32 | 1 P35280                                                                        |
| 1796 | 1,2,4,6,26, 3,5,7,8,25,<br>27,28,32 29,30,31 | 1 Q9QWN8                                                                        |
| 1797 | 1,2,4,6,26, 3,5,7,8,25,<br>27,29,30 28,31,32 | 3 P21588,Q80WL1,Q811M5                                                          |
| 1798 | 1,2,4,6,26, 3,5,7,8,25,<br>27,29,31 28,30,32 | 2 B1H234,P35280                                                                 |
| 1799 | 1,2,4,6,26, 3,5,7,8,25,<br>27,29,32 28,30,31 | 1 P06866                                                                        |
| 1800 | 1,2,4,6,26, 3,5,7,8,25,<br>27,30,31 28,29,32 | 3 P06760,P54921,Q9QYP1                                                          |
| 1801 | 1,2,4,6,26, 3,5,7,8,25,<br>27,30,32 28,29,31 | 2 P06760,Q68G31                                                                 |
| 1802 | 1,2,4,6,26, 3,5,7,8,25,<br>27,31,32 28,29,30 | 3 P06760,P22006,P80299                                                          |
| 1803 | 1,2,4,6,26, 3,5,7,8,25,<br>28,29,30 27,31,32 | 2 P21588,Q80WL1                                                                 |
| 1804 | 1,2,4,6,26, 3,5,7,8,25,<br>28,29,31 27,30,32 | 3 B1H234,P35280,Q63474                                                          |

|      |                                              |                                                    |
|------|----------------------------------------------|----------------------------------------------------|
| 1805 | 1,2,4,6,26, 3,5,7,8,25,<br>28,29,32 27,30,31 | 1 P06866                                           |
| 1806 | 1,2,4,6,26, 3,5,7,8,25,<br>28,30,31 27,29,32 | 2 P06760,Q9EQS0                                    |
| 1807 | 1,2,4,6,26, 3,5,7,8,25,<br>28,30,32 27,29,31 | 5 P06760,Q68G31,Q8VD89,Q9EQS0,Q9R168               |
| 1808 | 1,2,4,6,26, 3,5,7,8,25,<br>28,31,32 27,29,30 | 3 O54728,P06760,P22006                             |
| 1809 | 1,2,4,6,26, 3,5,7,8,25,<br>29,30,31 27,28,32 | 2 B1H234,P36860                                    |
| 1810 | 1,2,4,6,26, 3,5,7,8,25,<br>29,30,32 27,28,31 | 4 O55145,P36860,Q68G31,Q9R168                      |
| 1811 | 1,2,4,6,26, 3,5,7,8,25,<br>29,31,32 27,28,30 | 4 B1H234,P06866,P36860,P80299                      |
| 1812 | 1,2,4,6,26, 3,5,7,8,25,<br>30,31,32 27,28,29 | 7 P06760,P22006,P26342,P36860,Q4G075,Q9EQS0,Q9WTT6 |
| 1813 | 1,2,4,6,27, 3,5,7,8,25,<br>28,29,30 26,31,32 | 2 P21588,Q80WL1                                    |
| 1814 | 1,2,4,6,27, 3,5,7,8,25,<br>28,29,31 26,30,32 | 3 B1H234,P35280,P80299                             |
| 1815 | 1,2,4,6,27, 3,5,7,8,25,<br>28,29,32 26,30,31 | 5 O35547,P80299,Q62761;Q62762;Q62763,Q6AYR9,Q9JI85 |
| 1816 | 1,2,4,6,27, 3,5,7,8,25,<br>28,30,31 26,29,32 | 2 P06760,Q9QX74                                    |
| 1817 | 1,2,4,6,27, 3,5,7,8,25,<br>28,30,32 26,29,31 | 4 P06760,Q68G31,Q8VD89,Q9QX74                      |
| 1818 | 1,2,4,6,27, 3,5,7,8,25,<br>28,31,32 26,29,30 | 4 P06760,P22006,P80299,Q9QX74                      |
| 1819 | 1,2,4,6,27, 3,5,7,8,25,<br>29,30,31 26,28,32 | 3 B1H234,P19223,P80299                             |
| 1820 | 1,2,4,6,27, 3,5,7,8,25,<br>29,30,32 26,28,31 | 4 O55145,P14562,P80299,Q68G31                      |
| 1821 | 1,2,4,6,27, 3,5,7,8,25,<br>29,31,32 26,28,30 | 1 P80299                                           |
| 1822 | 1,2,4,6,27, 3,5,7,8,25,<br>30,31,32 26,28,29 | 7 P06760,P22006,P80299,Q6P6R2,Q9QX74,Q9QYP1,Q9WTT6 |
| 1823 | 1,2,4,6,28, 3,5,7,8,25,<br>29,30,31 26,27,32 | 2 B1H234,Q63474                                    |
| 1824 | 1,2,4,6,28, 3,5,7,8,25,<br>29,30,32 26,27,31 | 2 O55145,Q68G31                                    |

|      |                                              |                                                                  |
|------|----------------------------------------------|------------------------------------------------------------------|
| 1825 | 1,2,4,6,28, 3,5,7,8,25,<br>29,31,32 26,27,30 | 4 B1H234,P22006,P80299,Q63474                                    |
| 1826 | 1,2,4,6,28, 3,5,7,8,25,<br>30,31,32 26,27,29 | 8 P06760,P22006,P26342,P80299,Q4G075,Q8VD89,Q9QX74,Q9WTT6        |
| 1827 | 1,2,4,6,29, 3,5,7,8,25,<br>30,31,32 26,27,28 | 6 B1H234,O55145,P26342,P36860,P80299,Q9WTT6                      |
| 1828 | 1,2,4,7,8,2 3,5,6,28,2<br>5,26,27 9,30,31,32 | 9 G3V686,P20762,P97580,Q30KJ2,Q4G075,Q5BJY9,Q66H69,Q9WTT6,Q9Z1F2 |
| 1829 | 1,2,4,7,8,2 3,5,6,27,2<br>5,26,28 9,30,31,32 | 4 G3V686,Q63598,Q9WTT6,Q9Z1F2                                    |
| 1830 | 1,2,4,7,8,2 3,5,6,27,2<br>5,26,29 8,30,31,32 | 2 P22006,Q9QX74                                                  |
| 1831 | 1,2,4,7,8,2 3,5,6,27,2<br>5,26,30 8,29,31,32 | 3 G3V686,Q30KJ2,Q9Z1F2                                           |
| 1832 | 1,2,4,7,8,2 3,5,6,27,2<br>5,26,31 8,29,30,32 | 3 G3V686,Q9Z0V6,Q9Z1F2                                           |
| 1833 | 1,2,4,7,8,2 3,5,6,27,2<br>5,26,32 8,29,30,31 | 2 G3V686,Q9Z1F2                                                  |
| 1834 | 1,2,4,7,8,2 3,5,6,26,2<br>5,27,28 9,30,31,32 | 7 P06911,P0C0A9,P22282,P36860,Q4G075,Q66H69,Q9Z1F2               |
| 1835 | 1,2,4,7,8,2 3,5,6,26,2<br>5,27,29 8,30,31,32 | 5 P19223,P22006,P62804,Q4G075,Q66H69                             |
| 1836 | 1,2,4,7,8,2 3,5,6,26,2<br>5,27,30 8,29,31,32 | 7 P97580,Q10758,Q30KJ2,Q4G075,Q66H69,Q6IFU8,Q9Z1F2               |
| 1837 | 1,2,4,7,8,2 3,5,6,26,2<br>5,27,31 8,29,30,32 | 3 Q4G075,Q66H69,Q9QYP1                                           |
| 1838 | 1,2,4,7,8,2 3,5,6,26,2<br>5,27,32 8,29,30,31 | 1 Q66H69                                                         |
| 1839 | 1,2,4,7,8,2 3,5,6,26,2<br>5,28,29 7,30,31,32 | 4 P06911,P47727,P62804,Q812E4                                    |
| 1840 | 1,2,4,7,8,2 3,5,6,26,2<br>5,28,30 7,29,31,32 | 1 Q9Z1F2                                                         |
| 1841 | 1,2,4,7,8,2 3,5,6,26,2<br>5,28,31 7,29,30,32 | 5 P06911,P82471,Q5GRG2,Q811M5,Q9Z1F2                             |
| 1842 | 1,2,4,7,8,2 3,5,6,26,2<br>5,28,32 7,29,30,31 | 2 P08723,Q811M5                                                  |
| 1843 | 1,2,4,7,8,2 3,5,6,26,2<br>5,29,30 7,28,31,32 | 3 P22006,P62804,Q6IFU8                                           |
| 1844 | 1,2,4,7,8,2 3,5,6,26,2<br>5,29,31 7,28,30,32 | 1 P82471                                                         |

|      |                        |                          |                                                                                                      |
|------|------------------------|--------------------------|------------------------------------------------------------------------------------------------------|
| 1845 | 1,2,4,7,8,2<br>5,29,32 | 3,5,6,26,2<br>7,28,30,31 | 0                                                                                                    |
| 1846 | 1,2,4,7,8,2<br>5,30,31 | 3,5,6,26,2<br>7,28,29,32 | 2 G3V686,Q9Z1F2                                                                                      |
| 1847 | 1,2,4,7,8,2<br>5,30,32 | 3,5,6,26,2<br>7,28,29,31 | 1 G3V686                                                                                             |
| 1848 | 1,2,4,7,8,2<br>5,31,32 | 3,5,6,26,2<br>7,28,29,30 | 3 P21588,P82471,Q811M5                                                                               |
| 1849 | 1,2,4,7,8,2<br>6,27,28 | 3,5,6,25,2<br>9,30,31,32 | 12 P07150,P15399,P20762,P22282,P25809,P97580,Q30KJ2,Q4G075,Q5BJY9,Q66H69,Q9WTT6,Q9Z1F2               |
| 1850 | 1,2,4,7,8,2<br>6,27,29 | 3,5,6,25,2<br>8,30,31,32 | 9 P19223,P25809,P62804,P97580,Q30KJ2,Q4G075,Q66H69,Q9QX74,Q9WTT6                                     |
| 1851 | 1,2,4,7,8,2<br>6,27,30 | 3,5,6,25,2<br>8,29,31,32 | 7 P15399,P20762,P97580,Q10758,Q30KJ2,Q66H69,Q9Z1F2                                                   |
| 1852 | 1,2,4,7,8,2<br>6,27,31 | 3,5,6,25,2<br>8,29,30,32 | 4 Q30KJ2,Q5BJY9,Q66H69,Q9Z1F2                                                                        |
| 1853 | 1,2,4,7,8,2<br>6,27,32 | 3,5,6,25,2<br>8,29,30,31 | 5 P15399,P20762,Q30KJ2,Q66H69,Q9Z1F2                                                                 |
| 1854 | 1,2,4,7,8,2<br>6,28,29 | 3,5,6,25,2<br>7,30,31,32 | 6 P20646,P21674,P62804,Q6P6R2,Q9QX74,Q9WTT6                                                          |
| 1855 | 1,2,4,7,8,2<br>6,28,30 | 3,5,6,25,2<br>7,29,31,32 | 2 P20762,Q9Z1F2                                                                                      |
| 1856 | 1,2,4,7,8,2<br>6,28,31 | 3,5,6,25,2<br>7,29,30,32 | 3 P82471,Q63598,Q9Z1F2                                                                               |
| 1857 | 1,2,4,7,8,2<br>6,28,32 | 3,5,6,25,2<br>7,29,30,31 | 2 O54728,Q9Z1F2                                                                                      |
| 1858 | 1,2,4,7,8,2<br>6,29,30 | 3,5,6,25,2<br>7,28,31,32 | 1 P62804                                                                                             |
| 1859 | 1,2,4,7,8,2<br>6,29,31 | 3,5,6,25,2<br>7,28,30,32 | 2 P82471,Q9QX74                                                                                      |
| 1860 | 1,2,4,7,8,2<br>6,29,32 | 3,5,6,25,2<br>7,28,30,31 | 0                                                                                                    |
| 1861 | 1,2,4,7,8,2<br>6,30,31 | 3,5,6,25,2<br>7,28,29,32 | 1 Q9Z1F2                                                                                             |
| 1862 | 1,2,4,7,8,2<br>6,30,32 | 3,5,6,25,2<br>7,28,29,31 | 1 Q9Z1F2                                                                                             |
| 1863 | 1,2,4,7,8,2<br>6,31,32 | 3,5,6,25,2<br>7,28,29,30 | 3 O54728,P82471,Q9Z1F2                                                                               |
| 1864 | 1,2,4,7,8,2<br>7,28,29 | 3,5,6,25,2<br>6,30,31,32 | 14 P19223,P21674,P22282,P25809,P47727,P62804,Q00715,Q4G075,Q63493,Q63617,Q66H69,Q6AYR9,Q812E4,Q9Z2L0 |

|      |                         |                          |   |                                                                |
|------|-------------------------|--------------------------|---|----------------------------------------------------------------|
| 1865 | 1,2,4,7,8,2<br>7,28,30  | 3,5,6,25,2<br>6,29,31,32 | 7 | P19218,P62804,Q10758,Q30KJ2,Q4G075,Q66H69,Q9Z1F2               |
| 1866 | 1,2,4,7,8,2<br>7,28,31  | 3,5,6,25,2<br>6,29,30,32 | 3 | P82471,Q66H69,Q9Z1F2                                           |
| 1867 | 1,2,4,7,8,2<br>7,28,32  | 3,5,6,25,2<br>6,29,30,31 | 7 | P05964,P08723,P22282,Q66H69,Q6AYR9,Q812E4,Q9JI85               |
| 1868 | 1,2,4,7,8,2<br>7,29,30  | 3,5,6,25,2<br>6,28,31,32 | 9 | P00731,P19223,P62804,Q10758,Q30KJ2,Q4G075,Q66H69,Q6IFU8,Q6P6Q2 |
| 1869 | 1,2,4,7,8,2<br>7,29,31  | 3,5,6,25,2<br>6,28,30,32 | 5 | P19223,P80299,P82471,Q4G075,Q66H69                             |
| 1870 | 1,2,4,7,8,2<br>7,29,32  | 3,5,6,25,2<br>6,28,30,31 | 6 | P19223,P25809,P80299,Q4G075,Q66H69,Q6TMA8                      |
| 1871 | 1,2,4,7,8,2<br>7,30,31  | 3,5,6,25,2<br>6,28,29,32 | 6 | P82471,Q10758,Q66H69,Q6IFU8,Q9QYP1,Q9Z1F2                      |
| 1872 | 1,2,4,7,8,2<br>7,30,32  | 3,5,6,25,2<br>6,28,29,31 | 2 | Q10758,Q66H69                                                  |
| 1873 | 1,2,4,7,8,2<br>7,31,32  | 3,5,6,25,2<br>6,28,29,30 | 3 | P80299,P82471,Q66H69                                           |
| 1874 | 1,2,4,7,8,2<br>8,29,30  | 3,5,6,25,2<br>6,27,31,32 | 2 | P21674,P62804                                                  |
| 1875 | 1,2,4,7,8,2<br>8,29,31  | 3,5,6,25,2<br>6,27,30,32 | 3 | P21674,P82471,Q63493                                           |
| 1876 | 1,2,4,7,8,2<br>8,29,32  | 3,5,6,25,2<br>6,27,30,31 | 6 | P08723,P21674,P30120,P47727,Q63493,Q812E4                      |
| 1877 | 1,2,4,7,8,2<br>8,30,31  | 3,5,6,25,2<br>6,27,29,32 | 2 | P82471,Q9Z1F2                                                  |
| 1878 | 1,2,4,7,8,2<br>8,30,32  | 3,5,6,25,2<br>6,27,29,31 | 0 |                                                                |
| 1879 | 1,2,4,7,8,2<br>8,31,32  | 3,5,6,25,2<br>6,27,29,30 | 3 | P80299,P82471,Q811M5                                           |
| 1880 | 1,2,4,7,8,2<br>9,30,31  | 3,5,6,25,2<br>6,27,28,32 | 2 | P82471,Q5RJR2                                                  |
| 1881 | 1,2,4,7,8,2<br>9,30,32  | 3,5,6,25,2<br>6,27,28,31 | 0 |                                                                |
| 1882 | 1,2,4,7,8,2<br>9,31,32  | 3,5,6,25,2<br>6,27,28,30 | 2 | P80299,P82471                                                  |
| 1883 | 1,2,4,7,8,3<br>0,31,32  | 3,5,6,25,2<br>6,27,28,29 | 3 | P15999,P26342,P82471                                           |
| 1884 | 1,2,4,7,25,<br>26,27,28 | 3,5,6,8,29,<br>30,31,32  | 2 | P20646,Q9Z1F2                                                  |

|      |                                              |                               |
|------|----------------------------------------------|-------------------------------|
| 1885 | 1,2,4,7,25, 3,5,6,8,28,<br>26,27,29 30,31,32 | 2 P10758,P19223               |
| 1886 | 1,2,4,7,25, 3,5,6,8,28,<br>26,27,30 29,31,32 | 2 Q9R168,Q9Z1F2               |
| 1887 | 1,2,4,7,25, 3,5,6,8,28,<br>26,27,31 29,30,32 | 1 Q9QYP1                      |
| 1888 | 1,2,4,7,25, 3,5,6,8,28,<br>26,27,32 29,30,31 | 1 Q9R168                      |
| 1889 | 1,2,4,7,25, 3,5,6,8,27,<br>26,28,29 30,31,32 | 1 P20646                      |
| 1890 | 1,2,4,7,25, 3,5,6,8,27,<br>26,28,30 29,31,32 | 2 Q9R168,Q9Z1F2               |
| 1891 | 1,2,4,7,25, 3,5,6,8,27,<br>26,28,31 29,30,32 | 2 Q63598,Q9Z1F2               |
| 1892 | 1,2,4,7,25, 3,5,6,8,27,<br>26,28,32 29,30,31 | 1 Q9R168                      |
| 1893 | 1,2,4,7,25, 3,5,6,8,27,<br>26,29,30 28,31,32 | 1 Q9R168                      |
| 1894 | 1,2,4,7,25, 3,5,6,8,27,<br>26,29,31 28,30,32 | 1 P19218                      |
| 1895 | 1,2,4,7,25, 3,5,6,8,27,<br>26,29,32 28,30,31 | 2 Q6AYR8,Q9R168               |
| 1896 | 1,2,4,7,25, 3,5,6,8,27,<br>26,30,31 28,29,32 | 2 Q9QYP1,Q9Z1F2               |
| 1897 | 1,2,4,7,25, 3,5,6,8,27,<br>26,30,32 28,29,31 | 2 D3ZUC6,Q9R168               |
| 1898 | 1,2,4,7,25, 3,5,6,8,27,<br>26,31,32 28,29,30 | 2 P19218,Q9QYP1               |
| 1899 | 1,2,4,7,25, 3,5,6,8,26,<br>27,28,29 30,31,32 | 2 P10758,Q812E4               |
| 1900 | 1,2,4,7,25, 3,5,6,8,26,<br>27,28,30 29,31,32 | 0                             |
| 1901 | 1,2,4,7,25, 3,5,6,8,26,<br>27,28,31 29,30,32 | 1 Q9QYP1                      |
| 1902 | 1,2,4,7,25, 3,5,6,8,26,<br>27,28,32 29,30,31 | 2 Q62761;Q62762;Q62763,Q9R168 |
| 1903 | 1,2,4,7,25, 3,5,6,8,26,<br>27,29,30 28,31,32 | 1 P19223                      |
| 1904 | 1,2,4,7,25, 3,5,6,8,26,<br>27,29,31 28,30,32 | 4 P10758,P19223,P80299,Q9QYP1 |

|      |                                              |                                      |
|------|----------------------------------------------|--------------------------------------|
| 1905 | 1,2,4,7,25, 3,5,6,8,26,<br>27,29,32 28,30,31 | 2 P80299,Q9R168                      |
| 1906 | 1,2,4,7,25, 3,5,6,8,26,<br>27,30,31 28,29,32 | 1 Q9QYP1                             |
| 1907 | 1,2,4,7,25, 3,5,6,8,26,<br>27,30,32 28,29,31 | 2 Q9QYP1,Q9R168                      |
| 1908 | 1,2,4,7,25, 3,5,6,8,26,<br>27,31,32 28,29,30 | 2 P80299,Q9QYP1                      |
| 1909 | 1,2,4,7,25, 3,5,6,8,26,<br>28,29,30 27,31,32 | 1 Q9R168                             |
| 1910 | 1,2,4,7,25, 3,5,6,8,26,<br>28,29,31 27,30,32 | 0                                    |
| 1911 | 1,2,4,7,25, 3,5,6,8,26,<br>28,29,32 27,30,31 | 1 Q9R168                             |
| 1912 | 1,2,4,7,25, 3,5,6,8,26,<br>28,30,31 27,29,32 | 0                                    |
| 1913 | 1,2,4,7,25, 3,5,6,8,26,<br>28,30,32 27,29,31 | 2 Q62975,Q9R168                      |
| 1914 | 1,2,4,7,25, 3,5,6,8,26,<br>28,31,32 27,29,30 | 2 P80299,Q811M5                      |
| 1915 | 1,2,4,7,25, 3,5,6,8,26,<br>29,30,31 27,28,32 | 1 Q9QWN8                             |
| 1916 | 1,2,4,7,25, 3,5,6,8,26,<br>29,30,32 27,28,31 | 2 P26342,Q9R168                      |
| 1917 | 1,2,4,7,25, 3,5,6,8,26,<br>29,31,32 27,28,30 | 1 P80299                             |
| 1918 | 1,2,4,7,25, 3,5,6,8,26,<br>30,31,32 27,28,29 | 5 D3ZUC6,P26342,P80299,Q6P6R2,Q9QYP1 |
| 1919 | 1,2,4,7,26, 3,5,6,8,25,<br>27,28,29 30,31,32 | 2 P02625,P20646                      |
| 1920 | 1,2,4,7,26, 3,5,6,8,25,<br>27,28,30 29,31,32 | 3 P21588,Q80WL1,Q9Z1F2               |
| 1921 | 1,2,4,7,26, 3,5,6,8,25,<br>27,28,31 29,30,32 | 2 O88797,Q9Z1F2                      |
| 1922 | 1,2,4,7,26, 3,5,6,8,25,<br>27,28,32 29,30,31 | 2 P05964,Q62761;Q62762;Q62763        |
| 1923 | 1,2,4,7,26, 3,5,6,8,25,<br>27,29,30 28,31,32 | 3 P19223,P21588,Q80WL1               |
| 1924 | 1,2,4,7,26, 3,5,6,8,25,<br>27,29,31 28,30,32 | 2 P19223,P80299                      |



|      |                                              |                                                           |
|------|----------------------------------------------|-----------------------------------------------------------|
| 1925 | 1,2,4,7,26, 3,5,6,8,25,<br>27,29,32 28,30,31 | 1 P80299                                                  |
| 1926 | 1,2,4,7,26, 3,5,6,8,25,<br>27,30,31 28,29,32 | 2 Q9QYP1,Q9Z1F2                                           |
| 1927 | 1,2,4,7,26, 3,5,6,8,25,<br>27,30,32 28,29,31 | 1 Q9R168                                                  |
| 1928 | 1,2,4,7,26, 3,5,6,8,25,<br>27,31,32 28,29,30 | 2 P80299,Q9QYP1                                           |
| 1929 | 1,2,4,7,26, 3,5,6,8,25,<br>28,29,30 27,31,32 | 2 Q80WL1,Q9R168                                           |
| 1930 | 1,2,4,7,26, 3,5,6,8,25,<br>28,29,31 27,30,32 | 0                                                         |
| 1931 | 1,2,4,7,26, 3,5,6,8,25,<br>28,29,32 27,30,31 | 2 P14173,Q9R168                                           |
| 1932 | 1,2,4,7,26, 3,5,6,8,25,<br>28,30,31 27,29,32 | 1 Q9Z1F2                                                  |
| 1933 | 1,2,4,7,26, 3,5,6,8,25,<br>28,30,32 27,29,31 | 1 Q9R168                                                  |
| 1934 | 1,2,4,7,26, 3,5,6,8,25,<br>28,31,32 27,29,30 | 3 O54728,P14173,P80299                                    |
| 1935 | 1,2,4,7,26, 3,5,6,8,25,<br>29,30,31 27,28,32 | 1 P36860                                                  |
| 1936 | 1,2,4,7,26, 3,5,6,8,25,<br>29,30,32 27,28,31 | 2 P36376,Q9R168                                           |
| 1937 | 1,2,4,7,26, 3,5,6,8,25,<br>29,31,32 27,28,30 | 1 P80299                                                  |
| 1938 | 1,2,4,7,26, 3,5,6,8,25,<br>30,31,32 27,28,29 | 4 B2RYW9,P26342,P36860,P80299                             |
| 1939 | 1,2,4,7,27, 3,5,6,8,25,<br>28,29,30 26,31,32 | 1 Q80WL1                                                  |
| 1940 | 1,2,4,7,27, 3,5,6,8,25,<br>28,29,31 26,30,32 | 2 O88797,P80299                                           |
| 1941 | 1,2,4,7,27, 3,5,6,8,25,<br>28,29,32 26,30,31 | 6 O35547,P80299,Q62761;Q62762;Q62763,Q6AYR9,Q812E4,Q8CGS4 |
| 1942 | 1,2,4,7,27, 3,5,6,8,25,<br>28,30,31 26,29,32 | 2 P80299,Q9QYP1                                           |
| 1943 | 1,2,4,7,27, 3,5,6,8,25,<br>28,30,32 26,29,31 | 2 P80299,Q9R168                                           |
| 1944 | 1,2,4,7,27, 3,5,6,8,25,<br>28,31,32 26,29,30 | 3 P05964,P80299,Q62761;Q62762;Q62763                      |

|      |                                              |                                             |
|------|----------------------------------------------|---------------------------------------------|
| 1945 | 1,2,4,7,27, 3,5,6,8,25,<br>29,30,31 26,28,32 | 3 P19223,P80299,Q9QYP1                      |
| 1946 | 1,2,4,7,27, 3,5,6,8,25,<br>29,30,32 26,28,31 | 3 P19223,P80299,Q9R168                      |
| 1947 | 1,2,4,7,27, 3,5,6,8,25,<br>29,31,32 26,28,30 | 1 P80299                                    |
| 1948 | 1,2,4,7,27, 3,5,6,8,25,<br>30,31,32 26,28,29 | 2 P80299,Q9QYP1                             |
| 1949 | 1,2,4,7,28, 3,5,6,8,25,<br>29,30,31 26,27,32 | 1 P80299                                    |
| 1950 | 1,2,4,7,28, 3,5,6,8,25,<br>29,30,32 26,27,31 | 1 Q9R168                                    |
| 1951 | 1,2,4,7,28, 3,5,6,8,25,<br>29,31,32 26,27,30 | 1 P80299                                    |
| 1952 | 1,2,4,7,28, 3,5,6,8,25,<br>30,31,32 26,27,29 | 2 P26342,P80299                             |
| 1953 | 1,2,4,7,29, 3,5,6,8,25,<br>30,31,32 26,27,28 | 4 P26342,P36860,P63081,P80299               |
| 1954 | 1,2,4,8,25, 3,5,6,7,29,<br>26,27,28 30,31,32 | 5 P15399,P36860,P97580,Q30KJ2,Q5BJY9        |
| 1955 | 1,2,4,8,25, 3,5,6,7,28,<br>26,27,29 30,31,32 | 3 P15399,P97580,Q30KJ2                      |
| 1956 | 1,2,4,8,25, 3,5,6,7,28,<br>26,27,30 29,31,32 | 5 G3V686,P15399,P97580,Q10758,Q30KJ2        |
| 1957 | 1,2,4,8,25, 3,5,6,7,28,<br>26,27,31 29,30,32 | 6 P15399,P54921,P97580,Q30KJ2,Q5BJY9,Q9QYP1 |
| 1958 | 1,2,4,8,25, 3,5,6,7,28,<br>26,27,32 29,30,31 | 3 P15399,P97580,Q30KJ2                      |
| 1959 | 1,2,4,8,25, 3,5,6,7,27,<br>26,28,29 30,31,32 | 0                                           |
| 1960 | 1,2,4,8,25, 3,5,6,7,27,<br>26,28,30 29,31,32 | 2 G3V686,Q9Z1F2                             |
| 1961 | 1,2,4,8,25, 3,5,6,7,27,<br>26,28,31 29,30,32 | 0                                           |
| 1962 | 1,2,4,8,25, 3,5,6,7,27,<br>26,28,32 29,30,31 | 1 O54728                                    |
| 1963 | 1,2,4,8,25, 3,5,6,7,27,<br>26,29,30 28,31,32 | 0                                           |
| 1964 | 1,2,4,8,25, 3,5,6,7,27,<br>26,29,31 28,30,32 | 0                                           |

|      |                                              |                                             |
|------|----------------------------------------------|---------------------------------------------|
| 1965 | 1,2,4,8,25, 3,5,6,7,27,<br>26,29,32 28,30,31 | 0                                           |
| 1966 | 1,2,4,8,25, 3,5,6,7,27,<br>26,30,31 28,29,32 | 4 G3V686,P47967,P54921,Q6AY61               |
| 1967 | 1,2,4,8,25, 3,5,6,7,27,<br>26,30,32 28,29,31 | 4 D3ZUC6,G3V686,P00507,Q68G31               |
| 1968 | 1,2,4,8,25, 3,5,6,7,27,<br>26,31,32 28,29,30 | 4 G3V686,O54728,P00507,P47967               |
| 1969 | 1,2,4,8,25, 3,5,6,7,26,<br>27,28,29 30,31,32 | 4 P25809,P47727,Q6AYR9,Q812E4               |
| 1970 | 1,2,4,8,25, 3,5,6,7,26,<br>27,28,30 29,31,32 | 2 Q10758,Q30KJ2                             |
| 1971 | 1,2,4,8,25, 3,5,6,7,26,<br>27,28,31 29,30,32 | 0                                           |
| 1972 | 1,2,4,8,25, 3,5,6,7,26,<br>27,28,32 29,30,31 | 2 Q6AYR9,Q9QWN8                             |
| 1973 | 1,2,4,8,25, 3,5,6,7,26,<br>27,29,30 28,31,32 | 4 P19223,Q10758,Q30KJ2,Q6IFU8               |
| 1974 | 1,2,4,8,25, 3,5,6,7,26,<br>27,29,31 28,30,32 | 1 P19223                                    |
| 1975 | 1,2,4,8,25, 3,5,6,7,26,<br>27,29,32 28,30,31 | 0                                           |
| 1976 | 1,2,4,8,25, 3,5,6,7,26,<br>27,30,31 28,29,32 | 6 P47967,P54921,Q10758,Q30KJ2,Q6IFU8,Q9QYP1 |
| 1977 | 1,2,4,8,25, 3,5,6,7,26,<br>27,30,32 28,29,31 | 3 Q10758,Q30KJ2,Q68G31                      |
| 1978 | 1,2,4,8,25, 3,5,6,7,26,<br>27,31,32 28,29,30 | 2 P47967,Q9QYP1                             |
| 1979 | 1,2,4,8,25, 3,5,6,7,26,<br>28,29,30 27,31,32 | 1 Q62714                                    |
| 1980 | 1,2,4,8,25, 3,5,6,7,26,<br>28,29,31 27,30,32 | 0                                           |
| 1981 | 1,2,4,8,25, 3,5,6,7,26,<br>28,29,32 27,30,31 | 2 P30120,Q812E4                             |
| 1982 | 1,2,4,8,25, 3,5,6,7,26,<br>28,30,31 27,29,32 | 0                                           |
| 1983 | 1,2,4,8,25, 3,5,6,7,26,<br>28,30,32 27,29,31 | 1 Q68G31                                    |
| 1984 | 1,2,4,8,25, 3,5,6,7,26,<br>28,31,32 27,29,30 | 2 P21588,Q811M5                             |

|      |                                              |                                             |
|------|----------------------------------------------|---------------------------------------------|
| 1985 | 1,2,4,8,25, 3,5,6,7,26,<br>29,30,31 27,28,32 | 0                                           |
| 1986 | 1,2,4,8,25, 3,5,6,7,26,<br>29,30,32 27,28,31 | 1 Q68G31                                    |
| 1987 | 1,2,4,8,25, 3,5,6,7,26,<br>29,31,32 27,28,30 | 1 P21588                                    |
| 1988 | 1,2,4,8,25, 3,5,6,7,26,<br>30,31,32 27,28,29 | 3 D3ZUC6,P47967,Q9QYP1                      |
| 1989 | 1,2,4,8,26, 3,5,6,7,25,<br>27,28,29 30,31,32 | 5 P15399,P25809,Q30KJ2,Q6P6R2,Q812E4        |
| 1990 | 1,2,4,8,26, 3,5,6,7,25,<br>27,28,30 29,31,32 | 4 P15399,P97580,Q10758,Q30KJ2               |
| 1991 | 1,2,4,8,26, 3,5,6,7,25,<br>27,28,31 29,30,32 | 3 P15399,Q30KJ2,Q5BJY9                      |
| 1992 | 1,2,4,8,26, 3,5,6,7,25,<br>27,28,32 29,30,31 | 5 O54728,P15399,Q30KJ2,Q6AYR9,Q9QWN8        |
| 1993 | 1,2,4,8,26, 3,5,6,7,25,<br>27,29,30 28,31,32 | 6 P15399,P19223,P97580,Q10758,Q30KJ2,Q6IFU8 |
| 1994 | 1,2,4,8,26, 3,5,6,7,25,<br>27,29,31 28,30,32 | 2 P19223,Q30KJ2                             |
| 1995 | 1,2,4,8,26, 3,5,6,7,25,<br>27,29,32 28,30,31 | 4 P15399,P25809,Q30KJ2,Q9JJS8               |
| 1996 | 1,2,4,8,26, 3,5,6,7,25,<br>27,30,31 28,29,32 | 6 P15399,P54921,P97580,Q10758,Q30KJ2,Q6AY61 |
| 1997 | 1,2,4,8,26, 3,5,6,7,25,<br>27,30,32 28,29,31 | 4 P15399,P97580,Q10758,Q30KJ2               |
| 1998 | 1,2,4,8,26, 3,5,6,7,25,<br>27,31,32 28,29,30 | 3 O54728,P15399,Q30KJ2                      |
| 1999 | 1,2,4,8,26, 3,5,6,7,25,<br>28,29,30 27,31,32 | 0                                           |
| 2000 | 1,2,4,8,26, 3,5,6,7,25,<br>28,29,31 27,30,32 | 1 Q63474                                    |
| 2001 | 1,2,4,8,26, 3,5,6,7,25,<br>28,29,32 27,30,31 | 2 O54728,P30120                             |
| 2002 | 1,2,4,8,26, 3,5,6,7,25,<br>28,30,31 27,29,32 | 0                                           |
| 2003 | 1,2,4,8,26, 3,5,6,7,25,<br>28,30,32 27,29,31 | 2 O54728,Q68G31                             |
| 2004 | 1,2,4,8,26, 3,5,6,7,25,<br>28,31,32 27,29,30 | 1 O54728                                    |

|      |                                              |                                                           |
|------|----------------------------------------------|-----------------------------------------------------------|
| 2005 | 1,2,4,8,26, 3,5,6,7,25,<br>29,30,31 27,28,32 | 1 Q63474                                                  |
| 2006 | 1,2,4,8,26, 3,5,6,7,25,<br>29,30,32 27,28,31 | 1 Q68G31                                                  |
| 2007 | 1,2,4,8,26, 3,5,6,7,25,<br>29,31,32 27,28,30 | 2 O54728,Q63474                                           |
| 2008 | 1,2,4,8,26, 3,5,6,7,25,<br>30,31,32 27,28,29 | 3 O54728,P05539,P63081                                    |
| 2009 | 1,2,4,8,27, 3,5,6,7,25,<br>28,29,30 26,31,32 | 2 Q10758,Q812E4                                           |
| 2010 | 1,2,4,8,27, 3,5,6,7,25,<br>28,29,31 26,30,32 | 1 Q10758                                                  |
| 2011 | 1,2,4,8,27, 3,5,6,7,25,<br>28,29,32 26,30,31 | 8 O35547,P04905,P08723,P25809,P30120,P47727,Q6AYR9,Q812E4 |
| 2012 | 1,2,4,8,27, 3,5,6,7,25,<br>28,30,31 26,29,32 | 1 Q10758                                                  |
| 2013 | 1,2,4,8,27, 3,5,6,7,25,<br>28,30,32 26,29,31 | 3 P15399,Q10758,Q6AYR9                                    |
| 2014 | 1,2,4,8,27, 3,5,6,7,25,<br>28,31,32 26,29,30 | 1 Q6AYR9                                                  |
| 2015 | 1,2,4,8,27, 3,5,6,7,25,<br>29,30,31 26,28,32 | 3 P19223,Q10758,Q6IFU8                                    |
| 2016 | 1,2,4,8,27, 3,5,6,7,25,<br>29,30,32 26,28,31 | 2 Q10758,Q6IFU8                                           |
| 2017 | 1,2,4,8,27, 3,5,6,7,25,<br>29,31,32 26,28,30 | 1 P80299                                                  |
| 2018 | 1,2,4,8,27, 3,5,6,7,25,<br>30,31,32 26,28,29 | 2 Q10758,Q9QYP1                                           |
| 2019 | 1,2,4,8,28, 3,5,6,7,25,<br>29,30,31 26,27,32 | 1 Q63474                                                  |
| 2020 | 1,2,4,8,28, 3,5,6,7,25,<br>29,30,32 26,27,31 | 1 Q68G31                                                  |
| 2021 | 1,2,4,8,28, 3,5,6,7,25,<br>29,31,32 26,27,30 | 1 Q63474                                                  |
| 2022 | 1,2,4,8,28, 3,5,6,7,25,<br>30,31,32 26,27,29 | 1 P63081                                                  |
| 2023 | 1,2,4,8,29, 3,5,6,7,25,<br>30,31,32 26,27,28 | 2 P63081,Q63474                                           |
| 2024 | 1,2,4,25,2 3,5,6,7,8,3<br>6,27,28,29 0,31,32 | 1 P35280                                                  |

|      |                          |                        |                                                                  |
|------|--------------------------|------------------------|------------------------------------------------------------------|
| 2025 | 1,2,4,25,2<br>6,27,28,30 | 3,5,6,7,8,2<br>9,31,32 | 0                                                                |
| 2026 | 1,2,4,25,2<br>6,27,28,31 | 3,5,6,7,8,2<br>9,30,32 | 2 P35280,Q9QYP1                                                  |
| 2027 | 1,2,4,25,2<br>6,27,28,32 | 3,5,6,7,8,2<br>9,30,31 | 2 Q5RJR2,Q9QWN8                                                  |
| 2028 | 1,2,4,25,2<br>6,27,29,30 | 3,5,6,7,8,2<br>8,31,32 | 1 D3ZUC6                                                         |
| 2029 | 1,2,4,25,2<br>6,27,29,31 | 3,5,6,7,8,2<br>8,30,32 | 2 P35280,Q9QYP1                                                  |
| 2030 | 1,2,4,25,2<br>6,27,29,32 | 3,5,6,7,8,2<br>8,30,31 | 0                                                                |
| 2031 | 1,2,4,25,2<br>6,27,30,31 | 3,5,6,7,8,2<br>8,29,32 | 4 D3ZUC6,P47967,P54921,Q9QYP1                                    |
| 2032 | 1,2,4,25,2<br>6,27,30,32 | 3,5,6,7,8,2<br>8,29,31 | 4 D3ZUC6,P21674,Q9QYP1,Q9R168                                    |
| 2033 | 1,2,4,25,2<br>6,27,31,32 | 3,5,6,7,8,2<br>8,29,30 | 3 D3ZUC6,P47967,Q9QYP1                                           |
| 2034 | 1,2,4,25,2<br>6,28,29,30 | 3,5,6,7,8,2<br>7,31,32 | 3 P50115,Q62714,Q9QZK9                                           |
| 2035 | 1,2,4,25,2<br>6,28,29,31 | 3,5,6,7,8,2<br>7,30,32 | 2 P19218,P35280                                                  |
| 2036 | 1,2,4,25,2<br>6,28,29,32 | 3,5,6,7,8,2<br>7,30,31 | 3 P19218,P50115,Q6AYR8                                           |
| 2037 | 1,2,4,25,2<br>6,28,30,31 | 3,5,6,7,8,2<br>7,29,32 | 1 P50115                                                         |
| 2038 | 1,2,4,25,2<br>6,28,30,32 | 3,5,6,7,8,2<br>7,29,31 | 5 D3ZUC6,P50115,Q62975,Q68G31,Q9R168                             |
| 2039 | 1,2,4,25,2<br>6,28,31,32 | 3,5,6,7,8,2<br>7,29,30 | 3 O54728,P19218,P50115                                           |
| 2040 | 1,2,4,25,2<br>6,29,30,31 | 3,5,6,7,8,2<br>7,28,32 | 2 D3ZUC6,P50115                                                  |
| 2041 | 1,2,4,25,2<br>6,29,30,32 | 3,5,6,7,8,2<br>7,28,31 | 4 D3ZUC6,P50115,Q68G31,Q9R168                                    |
| 2042 | 1,2,4,25,2<br>6,29,31,32 | 3,5,6,7,8,2<br>7,28,30 | 4 D3ZUC6,P00507,P19218,P50115                                    |
| 2043 | 1,2,4,25,2<br>6,30,31,32 | 3,5,6,7,8,2<br>7,28,29 | 9 D3ZUC6,P00507,P04636,P06760,P47967,P50115,Q4G075,Q9EQS0,Q9QYP1 |
| 2044 | 1,2,4,25,2<br>7,28,29,30 | 3,5,6,7,8,2<br>6,31,32 | 1 Q62714                                                         |

|      |                                              |                                                           |
|------|----------------------------------------------|-----------------------------------------------------------|
| 2045 | 1,2,4,25,2 3,5,6,7,8,2<br>7,28,29,31 6,30,32 | 1 P35280                                                  |
| 2046 | 1,2,4,25,2 3,5,6,7,8,2<br>7,28,29,32 6,30,31 | 6 O35547,P00758,Q62761;Q62762;Q62763,Q6AYR9,Q812E4,Q8CGS4 |
| 2047 | 1,2,4,25,2 3,5,6,7,8,2<br>7,28,30,31 6,29,32 | 1 Q9QYP1                                                  |
| 2048 | 1,2,4,25,2 3,5,6,7,8,2<br>7,28,30,32 6,29,31 | 3 D3ZUC6,P06760,Q9QX74                                    |
| 2049 | 1,2,4,25,2 3,5,6,7,8,2<br>7,28,31,32 6,29,30 | 2 Q9QX74,Q9QYP1                                           |
| 2050 | 1,2,4,25,2 3,5,6,7,8,2<br>7,29,30,31 6,28,32 | 2 D3ZUC6,Q9QYP1                                           |
| 2051 | 1,2,4,25,2 3,5,6,7,8,2<br>7,29,30,32 6,28,31 | 1 D3ZUC6                                                  |
| 2052 | 1,2,4,25,2 3,5,6,7,8,2<br>7,29,31,32 6,28,30 | 2 P80299,Q9QYP1                                           |
| 2053 | 1,2,4,25,2 3,5,6,7,8,2<br>7,30,31,32 6,28,29 | 7 D3ZUC6,P06760,P47967,Q6P6R2,Q9QX74,Q9QYP1,Q9WTT6        |
| 2054 | 1,2,4,25,2 3,5,6,7,8,2<br>8,29,30,31 6,27,32 | 2 P50115,P50116                                           |
| 2055 | 1,2,4,25,2 3,5,6,7,8,2<br>8,29,30,32 6,27,31 | 6 D3ZUC6,P50115,P50116,Q62714,Q68G31,Q9R168               |
| 2056 | 1,2,4,25,2 3,5,6,7,8,2<br>8,29,31,32 6,27,30 | 2 P50115,P50116                                           |
| 2057 | 1,2,4,25,2 3,5,6,7,8,2<br>8,30,31,32 6,27,29 | 7 D3ZUC6,P06760,P50115,P50116,Q9QX74,Q9QYP1,Q9WTT6        |
| 2058 | 1,2,4,25,2 3,5,6,7,8,2<br>9,30,31,32 6,27,28 | 8 D3ZUC6,P07150,P47967,P50115,P50116,P63081,Q9QYP1,Q9WTT6 |
| 2059 | 1,2,4,26,2 3,5,6,7,8,2<br>7,28,29,30 5,31,32 | 1 P21588                                                  |
| 2060 | 1,2,4,26,2 3,5,6,7,8,2<br>7,28,29,31 5,30,32 | 1 P35280                                                  |
| 2061 | 1,2,4,26,2 3,5,6,7,8,2<br>7,28,29,32 5,30,31 | 5 O35547,P00758,Q62761;Q62762;Q62763,Q6AYR9,Q8CGS4        |
| 2062 | 1,2,4,26,2 3,5,6,7,8,2<br>7,28,30,31 5,29,32 | 0                                                         |
| 2063 | 1,2,4,26,2 3,5,6,7,8,2<br>7,28,30,32 5,29,31 | 0                                                         |
| 2064 | 1,2,4,26,2 3,5,6,7,8,2<br>7,28,31,32 5,29,30 | 1 O54728                                                  |

|      |                          |                               |                                                                  |
|------|--------------------------|-------------------------------|------------------------------------------------------------------|
| 2065 | 1,2,4,26,2<br>7,29,30,31 | 3,5,6,7,8,2<br>5,28,32        | 0                                                                |
| 2066 | 1,2,4,26,2<br>7,29,30,32 | 3,5,6,7,8,2<br>5,28,31        | 0                                                                |
| 2067 | 1,2,4,26,2<br>7,29,31,32 | 3,5,6,7,8,2<br>5,28,30        | 2 O70417,P80299                                                  |
| 2068 | 1,2,4,26,2<br>7,30,31,32 | 3,5,6,7,8,2<br>5,28,29        | 2 P06760,Q9QYP1                                                  |
| 2069 | 1,2,4,26,2<br>8,29,30,31 | 3,5,6,7,8,2<br>5,27,32        | 2 P50115,Q63474                                                  |
| 2070 | 1,2,4,26,2<br>8,29,30,32 | 3,5,6,7,8,2<br>5,27,31        | 3 P50115,Q68G31,Q9R168                                           |
| 2071 | 1,2,4,26,2<br>8,29,31,32 | 3,5,6,7,8,2<br>5,27,30        | 4 O54728,O70417,P50115,Q63474                                    |
| 2072 | 1,2,4,26,2<br>8,30,31,32 | 3,5,6,7,8,2<br>5,27,29        | 4 O54728,P06760,P50115,Q4G075                                    |
| 2073 | 1,2,4,26,2<br>9,30,31,32 | 3,5,6,7,8,2<br>5,27,28        | 5 P36860,P50115,P50116,P63081,Q5QE79                             |
| 2074 | 1,2,4,27,2<br>8,29,30,31 | 3,5,6,7,8,2<br>5,26,32        | 1 P80299                                                         |
| 2075 | 1,2,4,27,2<br>8,29,30,32 | 3,5,6,7,8,2<br>5,26,31        | 0                                                                |
| 2076 | 1,2,4,27,2<br>8,29,31,32 | 3,5,6,7,8,2<br>5,26,30        | 4 O35547,P36374,P80299,Q62761;Q62762;Q62763                      |
| 2077 | 1,2,4,27,2<br>8,30,31,32 | 3,5,6,7,8,2<br>5,26,29        | 4 P06760,P80299,Q9QX74,Q9QYP1                                    |
| 2078 | 1,2,4,27,2<br>9,30,31,32 | 3,5,6,7,8,2<br>5,26,28        | 4 B0BNN3,P80299,Q9QYP1,Q9WTT6                                    |
| 2079 | 1,2,4,28,2<br>9,30,31,32 | 3,5,6,7,8,2<br>5,26,27        | 6 P50115,P50116,P63081,P80299,Q63474,Q9WTT6                      |
| 2080 | 1,2,5,6,7,8<br>,25,26    | 3,4,27,28,<br>29,30,31,3<br>2 | 4 O54858,P00762,P50115,P52590                                    |
| 2081 | 1,2,5,6,7,8<br>,25,27    | 3,4,26,28,<br>29,30,31,3<br>2 | 9 O54858,P02631,P06911,P50115,P50116,P52590,Q03191,Q66H69,Q91ZS3 |
| 2082 | 1,2,5,6,7,8<br>,25,28    | 3,4,26,27,<br>29,30,31,3<br>2 | 6 O54858,P00762,P02631,P06911,P52590,Q5GRG2                      |



|      |                       |                               |         |                                                                                                       |
|------|-----------------------|-------------------------------|---------|-------------------------------------------------------------------------------------------------------|
| 2083 | 1,2,5,6,7,8<br>,25,29 | 3,4,26,27,<br>28,30,31,3<br>2 | 5       | P00762,P02631,P06760,P52590,P62804                                                                    |
| 2084 | 1,2,5,6,7,8<br>,25,30 | 3,4,26,27,<br>28,29,31,3<br>2 | 5       | O54858,P00762,P02631,P52590,Q6IG05                                                                    |
| 2085 | 1,2,5,6,7,8<br>,25,31 | 3,4,26,27,<br>28,29,30,3<br>2 | 6       | O54858,P00762,P06911,P12020,P52590,Q63532                                                             |
| 2086 | 1,2,5,6,7,8<br>,25,32 | 3,4,26,27,<br>28,29,30,3<br>1 | 4       | O54858,P02631,P13432,P52590                                                                           |
| 2087 | 1,2,5,6,7,8<br>,26,27 | 3,4,25,28,<br>29,30,31,3<br>2 | 9       | P15399,P50115,P50116,P52590,P97580,Q03191,Q62714,Q66H69,Q9JJ50                                        |
| 2088 | 1,2,5,6,7,8<br>,26,28 | 3,4,25,27,<br>29,30,31,3<br>2 | 3       | P00762,P52590,Q5RLM2                                                                                  |
| 2089 | 1,2,5,6,7,8<br>,26,29 | 3,4,25,27,<br>28,30,31,3<br>2 | 6       | P00762,P06760,P29315,P52590,P62804,Q9QX74                                                             |
| 2090 | 1,2,5,6,7,8<br>,26,30 | 3,4,25,27,<br>28,29,31,3<br>2 | 7       | O54858,P00762,P29315,P52590,Q5RJR2,Q6IG05,Q99MH3                                                      |
| 2091 | 1,2,5,6,7,8<br>,26,31 | 3,4,25,27,<br>28,29,30,3<br>2 | 7       | O54858,P00762,P20766,P52590,P57113,Q62714,Q63532                                                      |
| 2092 | 1,2,5,6,7,8<br>,26,32 | 3,4,25,27,<br>28,29,30,3<br>1 | 5       | O54858,P29315,P52590,Q62714,Q99MH3                                                                    |
| 2093 | 1,2,5,6,7,8<br>,27,28 | 3,4,25,26,<br>29,30,31,3<br>2 | 9       | P00762,P19218,P50115,P50116,P52590,Q00715,Q03191,Q66H69,Q9JI85                                        |
| 2094 | 1,2,5,6,7,8<br>,27,29 | 3,4,25,26,<br>28,30,31,3<br>2 | 14      | P00731,P06760,P19218,P25809,P29315,P50115,P50116,P52590,P62804,Q00715,Q03191,Q4G0<br>75,Q66H69,Q9JJ50 |
| 2095 | 1,2,5,6,7,8<br>,27,30 | 3,4,25,26,<br>28,29,31,3<br>2 | 12<br>3 | P00731,P01039,P19218,P29315,P50115,P50116,P52590,Q03191,Q5I0J9,Q66H69,Q6IG05,Q8CJD                    |

|      |                        |                               |                                                                          |
|------|------------------------|-------------------------------|--------------------------------------------------------------------------|
| 2096 | 1,2,5,6,7,8<br>,27,31  | 3,4,25,26,<br>28,29,30,3<br>2 | 10 O54858,P00731,P01039,P19218,P50115,P50116,P52590,Q03191,Q62714,Q63532 |
| 2097 | 1,2,5,6,7,8<br>,27,32  | 3,4,25,26,<br>28,29,30,3<br>1 | 10 P01039,P19218,P29315,P50115,P50116,P52590,Q03191,Q62714,Q66H69,Q9JJ50 |
| 2098 | 1,2,5,6,7,8<br>,28,29  | 3,4,25,26,<br>27,30,31,3<br>2 | 9 P00762,P06760,P21674,P29315,P52590,P62804,Q00715,Q9JI85,Q9QYP1         |
| 2099 | 1,2,5,6,7,8<br>,28,30  | 3,4,25,26,<br>27,29,31,3<br>2 | 7 P00762,P19218,P29315,P35745,P52590,P62804,Q6IG05                       |
| 2100 | 1,2,5,6,7,8<br>,28,31  | 3,4,25,26,<br>27,29,30,3<br>2 | 7 O54858,P00762,P12020,P35745,P52590,Q63532,Q811M5                       |
| 2101 | 1,2,5,6,7,8<br>,28,32  | 3,4,25,26,<br>27,29,30,3<br>1 | 4 P02631,P29315,P52590,Q9JI85                                            |
| 2102 | 1,2,5,6,7,8<br>,29,30  | 3,4,25,26,<br>27,28,31,3<br>2 | 9 P00762,P01835,P19218,P29315,P52590,P62804,Q5I0J9,Q5RJR2,Q6IG05         |
| 2103 | 1,2,5,6,7,8<br>,29,31  | 3,4,25,26,<br>27,28,30,3<br>2 | 3 P00762,P52590,Q5RJR2                                                   |
| 2104 | 1,2,5,6,7,8<br>,29,32  | 3,4,25,26,<br>27,28,30,3<br>1 | 3 P01835,P29315,P52590                                                   |
| 2105 | 1,2,5,6,7,8<br>,30,31  | 3,4,25,26,<br>27,28,29,3<br>2 | 8 O54858,P00762,P19218,P35745,P52590,Q5RJR2,Q63532,Q6IG05                |
| 2106 | 1,2,5,6,7,8<br>,30,32  | 3,4,25,26,<br>27,28,29,3<br>1 | 7 O54858,P19218,P26342,P29315,P52590,Q5I0J9,Q6IG05                       |
| 2107 | 1,2,5,6,7,8<br>,31,32  | 3,4,25,26,<br>27,28,29,3<br>0 | 4 O54858,P52590,Q62714,Q63532                                            |
| 2108 | 1,2,5,6,7,2<br>5,26,27 | 3,4,8,28,2<br>9,30,31,32      | 4 P01039,P50116,Q03191,Q9JJ50                                            |
| 2109 | 1,2,5,6,7,2<br>5,26,28 | 3,4,8,27,2<br>9,30,31,32      | 1 P00762                                                                 |

|      |                        |                          |   |                                                         |
|------|------------------------|--------------------------|---|---------------------------------------------------------|
| 2110 | 1,2,5,6,7,2<br>5,26,29 | 3,4,8,27,2<br>8,30,31,32 | 3 | P00762,P01835,P52590                                    |
| 2111 | 1,2,5,6,7,2<br>5,26,30 | 3,4,8,27,2<br>8,29,31,32 | 3 | P00762,Q9EQS0,Q9R168                                    |
| 2112 | 1,2,5,6,7,2<br>5,26,31 | 3,4,8,27,2<br>8,29,30,32 | 3 | P00762,Q63150,Q9EQS0                                    |
| 2113 | 1,2,5,6,7,2<br>5,26,32 | 3,4,8,27,2<br>8,29,30,31 | 3 | Q5PQL7,Q9EQS0,Q9R168                                    |
| 2114 | 1,2,5,6,7,2<br>5,27,28 | 3,4,8,26,2<br>9,30,31,32 | 3 | P00762,P50116,Q03191                                    |
| 2115 | 1,2,5,6,7,2<br>5,27,29 | 3,4,8,26,2<br>8,30,31,32 | 5 | O54728,P50116,P52590,Q03191,Q9JJ50                      |
| 2116 | 1,2,5,6,7,2<br>5,27,30 | 3,4,8,26,2<br>8,29,31,32 | 4 | O54728,P01039,P50116,Q03191                             |
| 2117 | 1,2,5,6,7,2<br>5,27,31 | 3,4,8,26,2<br>8,29,30,32 | 4 | O54728,P01039,P50116,Q03191                             |
| 2118 | 1,2,5,6,7,2<br>5,27,32 | 3,4,8,26,2<br>8,29,30,31 | 4 | P01039,P50116,Q03191,Q9JJ50                             |
| 2119 | 1,2,5,6,7,2<br>5,28,29 | 3,4,8,26,2<br>7,30,31,32 | 3 | P00762,P01835,P52590                                    |
| 2120 | 1,2,5,6,7,2<br>5,28,30 | 3,4,8,26,2<br>7,29,31,32 | 2 | P00762,Q5PQL7                                           |
| 2121 | 1,2,5,6,7,2<br>5,28,31 | 3,4,8,26,2<br>7,29,30,32 | 1 | P00762                                                  |
| 2122 | 1,2,5,6,7,2<br>5,28,32 | 3,4,8,26,2<br>7,29,30,31 | 2 | Q5PQL7,Q62975                                           |
| 2123 | 1,2,5,6,7,2<br>5,29,30 | 3,4,8,26,2<br>7,28,31,32 | 5 | O54728,P00762,P01835,P52590,Q9QWN8                      |
| 2124 | 1,2,5,6,7,2<br>5,29,31 | 3,4,8,26,2<br>7,28,30,32 | 5 | O54728,P00762,P01835,P52590,Q9QWN8                      |
| 2125 | 1,2,5,6,7,2<br>5,29,32 | 3,4,8,26,2<br>7,28,30,31 | 2 | P01835,P52590                                           |
| 2126 | 1,2,5,6,7,2<br>5,30,31 | 3,4,8,26,2<br>7,28,29,32 | 8 | O54728,P00762,P26342,Q6AYR9,Q6P6R2,Q9EQS0,Q9QWN8,Q9WVK7 |
| 2127 | 1,2,5,6,7,2<br>5,30,32 | 3,4,8,26,2<br>7,28,29,31 | 6 | P26342,Q5PQL7,Q6P6R2,Q9EQS0,Q9R168,Q9WVK7               |
| 2128 | 1,2,5,6,7,2<br>5,31,32 | 3,4,8,26,2<br>7,28,29,30 | 3 | P26342,Q6P6R2,Q9WVK7                                    |
| 2129 | 1,2,5,6,7,2<br>6,27,28 | 3,4,8,25,2<br>9,30,31,32 | 7 | P00762,P02625,P14173,P21588,P50116,Q03191,Q9JJ50        |

|      |                        |                          |    |                                                                                                   |
|------|------------------------|--------------------------|----|---------------------------------------------------------------------------------------------------|
| 2130 | 1,2,5,6,7,2<br>6,27,29 | 3,4,8,25,2<br>8,30,31,32 | 8  | P00762,P01835,P02625,P21588,P50116,P52590,Q03191,Q9JJ50                                           |
| 2131 | 1,2,5,6,7,2<br>6,27,30 | 3,4,8,25,2<br>8,29,31,32 | 7  | P00762,P01039,P21588,P29315,P50116,Q03191,Q9JJ50                                                  |
| 2132 | 1,2,5,6,7,2<br>6,27,31 | 3,4,8,25,2<br>8,29,30,32 | 6  | P00762,P01039,P50116,Q03191,Q62714,Q9JJ50                                                         |
| 2133 | 1,2,5,6,7,2<br>6,27,32 | 3,4,8,25,2<br>8,29,30,31 | 6  | P01039,P14173,P50116,Q03191,Q62714,Q9JJ50                                                         |
| 2134 | 1,2,5,6,7,2<br>6,28,29 | 3,4,8,25,2<br>7,30,31,32 | 7  | P00762,P01835,P02625,P14173,P29315,P47967,P52590                                                  |
| 2135 | 1,2,5,6,7,2<br>6,28,30 | 3,4,8,25,2<br>7,29,31,32 | 5  | P00762,P01835,P21588,P29315,Q9EQS0                                                                |
| 2136 | 1,2,5,6,7,2<br>6,28,31 | 3,4,8,25,2<br>7,29,30,32 | 4  | P00762,P01835,P14173,Q6IG02                                                                       |
| 2137 | 1,2,5,6,7,2<br>6,28,32 | 3,4,8,25,2<br>7,29,30,31 | 6  | P00762,P01835,P14173,P29315,P52590,Q6IG02                                                         |
| 2138 | 1,2,5,6,7,2<br>6,29,30 | 3,4,8,25,2<br>7,28,31,32 | 6  | P00762,P01835,P21588,P29315,P36860,P52590                                                         |
| 2139 | 1,2,5,6,7,2<br>6,29,31 | 3,4,8,25,2<br>7,28,30,32 | 6  | O70417,P00762,P01835,P14173,P36860,P52590                                                         |
| 2140 | 1,2,5,6,7,2<br>6,29,32 | 3,4,8,25,2<br>7,28,30,31 | 8  | O70417,P00762,P01835,P14173,P29315,P36860,P52590,Q9JJ50                                           |
| 2141 | 1,2,5,6,7,2<br>6,30,31 | 3,4,8,25,2<br>7,28,29,32 | 6  | P00762,P01835,P36860,Q6AYR9,Q812E4,Q9EQS0                                                         |
| 2142 | 1,2,5,6,7,2<br>6,30,32 | 3,4,8,25,2<br>7,28,29,31 | 8  | P01835,P26342,P29315,P36860,Q5I0J9,Q99MH3,Q9EQS0,Q9R168                                           |
| 2143 | 1,2,5,6,7,2<br>6,31,32 | 3,4,8,25,2<br>7,28,29,30 | 8  | O70417,P01835,P14173,P36860,P57113,Q62714,Q6IG02,Q9EQS0                                           |
| 2144 | 1,2,5,6,7,2<br>7,28,29 | 3,4,8,25,2<br>6,30,31,32 | 11 | P00762,P01835,P02625,P05539,P29315,P47967,P50116,P52590,Q00715,Q03191,Q6AY61                      |
| 2145 | 1,2,5,6,7,2<br>7,28,30 | 3,4,8,25,2<br>6,29,31,32 | 8  | P00762,P01039,P19218,P21588,P29315,P50116,Q03191,Q5I0J9                                           |
| 2146 | 1,2,5,6,7,2<br>7,28,31 | 3,4,8,25,2<br>6,29,30,32 | 4  | P00762,P01039,P50116,Q03191                                                                       |
| 2147 | 1,2,5,6,7,2<br>7,28,32 | 3,4,8,25,2<br>6,29,30,31 | 7  | P14173,P29315,P50116,P52590,Q03191,Q62761;Q62762;Q62763,Q6AY61                                    |
| 2148 | 1,2,5,6,7,2<br>7,29,30 | 3,4,8,25,2<br>6,28,31,32 | 14 | O54728,P00731,P00762,P01039,P01835,P19218,P21588,P29315,P50116,P52590,Q03191,Q5I0J9,Q923V8,Q9JJ50 |
| 2149 | 1,2,5,6,7,2<br>7,29,31 | 3,4,8,25,2<br>6,28,30,32 | 9  | O54728,O70417,P00762,P01039,P01835,P50116,P52590,P80299,Q03191                                    |

|      |                        |                          |   |                                                                |
|------|------------------------|--------------------------|---|----------------------------------------------------------------|
| 2150 | 1,2,5,6,7,2<br>7,29,32 | 3,4,8,25,2<br>6,28,30,31 | 7 | P01835,P29315,P50116,P52590,Q03191,Q6AY61,Q9JJ50               |
| 2151 | 1,2,5,6,7,2<br>7,30,31 | 3,4,8,25,2<br>6,28,29,32 | 7 | O54728,P00762,P01039,P19218,P36860,P50116,Q03191               |
| 2152 | 1,2,5,6,7,2<br>7,30,32 | 3,4,8,25,2<br>6,28,29,31 | 9 | P01039,P19218,P29315,P50116,Q03191,Q5I0J9,Q6P6R2,Q9JJ50,Q9R168 |
| 2153 | 1,2,5,6,7,2<br>7,31,32 | 3,4,8,25,2<br>6,28,29,30 | 5 | P01039,P50116,P80299,Q03191,Q62714                             |
| 2154 | 1,2,5,6,7,2<br>8,29,30 | 3,4,8,25,2<br>6,27,31,32 | 4 | P00762,P01835,P29315,P52590                                    |
| 2155 | 1,2,5,6,7,2<br>8,29,31 | 3,4,8,25,2<br>6,27,30,32 | 6 | O70417,P00762,P01835,P14173,P21674,P52590                      |
| 2156 | 1,2,5,6,7,2<br>8,29,32 | 3,4,8,25,2<br>6,27,30,31 | 7 | P00762,P01835,P14173,P29315,P52590,P54921,Q6AY61               |
| 2157 | 1,2,5,6,7,2<br>8,30,31 | 3,4,8,25,2<br>6,27,29,32 | 2 | P00762,P01835                                                  |
| 2158 | 1,2,5,6,7,2<br>8,30,32 | 3,4,8,25,2<br>6,27,29,31 | 6 | P00762,P01835,P29315,P52590,Q5I0J9,Q9R168                      |
| 2159 | 1,2,5,6,7,2<br>8,31,32 | 3,4,8,25,2<br>6,27,29,30 | 5 | P00762,P01835,P14173,P52590,Q6IG02                             |
| 2160 | 1,2,5,6,7,2<br>9,30,31 | 3,4,8,25,2<br>6,27,28,32 | 7 | O54728,P00762,P01835,P26342,P36860,P52590,Q9QWN8               |
| 2161 | 1,2,5,6,7,2<br>9,30,32 | 3,4,8,25,2<br>6,27,28,31 | 8 | P01835,P26342,P29315,P36860,P52590,Q5BJY9,Q5I0J9,Q9R168        |
| 2162 | 1,2,5,6,7,2<br>9,31,32 | 3,4,8,25,2<br>6,27,28,30 | 7 | O70417,P01835,P14173,P26342,P36860,P52590,P80299               |
| 2163 | 1,2,5,6,7,3<br>0,31,32 | 3,4,8,25,2<br>6,27,28,29 | 7 | P01835,P20646,P26342,P36860,Q5I0J9,Q6P6R2,Q9EQS0               |
| 2164 | 1,2,5,6,8,2<br>5,26,27 | 3,4,7,28,2<br>9,30,31,32 | 5 | P15399,P17559,P97580,Q30KJ2,Q9JJ50                             |
| 2165 | 1,2,5,6,8,2<br>5,26,28 | 3,4,7,27,2<br>9,30,31,32 | 4 | P00714,P00762,P08649,P80299                                    |
| 2166 | 1,2,5,6,8,2<br>5,26,29 | 3,4,7,27,2<br>8,30,31,32 | 1 | P13432                                                         |
| 2167 | 1,2,5,6,8,2<br>5,26,30 | 3,4,7,27,2<br>8,29,31,32 | 3 | P80299,Q6IG05,Q99MH3                                           |
| 2168 | 1,2,5,6,8,2<br>5,26,31 | 3,4,7,27,2<br>8,29,30,32 | 3 | O54858,P97840,Q99MH3                                           |
| 2169 | 1,2,5,6,8,2<br>5,26,32 | 3,4,7,27,2<br>8,29,30,31 | 4 | P00507,P13432,Q68G31,Q99MH3                                    |

|      |                        |                          |                                                                  |
|------|------------------------|--------------------------|------------------------------------------------------------------|
| 2170 | 1,2,5,6,8,2<br>5,27,28 | 3,4,7,26,2<br>9,30,31,32 | 0                                                                |
| 2171 | 1,2,5,6,8,2<br>5,27,29 | 3,4,7,26,2<br>8,30,31,32 | 0                                                                |
| 2172 | 1,2,5,6,8,2<br>5,27,30 | 3,4,7,26,2<br>8,29,31,32 | 3 Q03191,Q5I0J9,Q6IG05                                           |
| 2173 | 1,2,5,6,8,2<br>5,27,31 | 3,4,7,26,2<br>8,29,30,32 | 3 P23739,P97840,Q03191                                           |
| 2174 | 1,2,5,6,8,2<br>5,27,32 | 3,4,7,26,2<br>8,29,30,31 | 1 Q03191                                                         |
| 2175 | 1,2,5,6,8,2<br>5,28,29 | 3,4,7,26,2<br>7,30,31,32 | 2 P00762,P52590                                                  |
| 2176 | 1,2,5,6,8,2<br>5,28,30 | 3,4,7,26,2<br>7,29,31,32 | 1 Q6IG05                                                         |
| 2177 | 1,2,5,6,8,2<br>5,28,31 | 3,4,7,26,2<br>7,29,30,32 | 2 Q5GRG2,Q63532                                                  |
| 2178 | 1,2,5,6,8,2<br>5,28,32 | 3,4,7,26,2<br>7,29,30,31 | 1 Q68G31                                                         |
| 2179 | 1,2,5,6,8,2<br>5,29,30 | 3,4,7,26,2<br>7,28,31,32 | 1 Q6IG05                                                         |
| 2180 | 1,2,5,6,8,2<br>5,29,31 | 3,4,7,26,2<br>7,28,30,32 | 0                                                                |
| 2181 | 1,2,5,6,8,2<br>5,29,32 | 3,4,7,26,2<br>7,28,30,31 | 3 P13432,P52590,Q68G31                                           |
| 2182 | 1,2,5,6,8,2<br>5,30,31 | 3,4,7,26,2<br>7,28,29,32 | 5 O54858,P20646,P97840,Q63532,Q6IG05                             |
| 2183 | 1,2,5,6,8,2<br>5,30,32 | 3,4,7,26,2<br>7,28,29,31 | 5 P20646,Q5I0J9,Q68G31,Q6IG05,Q6P6R2                             |
| 2184 | 1,2,5,6,8,2<br>5,31,32 | 3,4,7,26,2<br>7,28,29,30 | 5 O54858,P13432,P20646,P97840,Q63532                             |
| 2185 | 1,2,5,6,8,2<br>6,27,28 | 3,4,7,25,2<br>9,30,31,32 | 1 P15399                                                         |
| 2186 | 1,2,5,6,8,2<br>6,27,29 | 3,4,7,25,2<br>8,30,31,32 | 4 P15399,P25809,P52590,Q9JJ50                                    |
| 2187 | 1,2,5,6,8,2<br>6,27,30 | 3,4,7,25,2<br>8,29,31,32 | 9 P15399,P21588,P97580,Q30KJ2,Q5I0J9,Q6IG05,Q8CJD3,Q99MH3,Q9JJ50 |
| 2188 | 1,2,5,6,8,2<br>6,27,31 | 3,4,7,25,2<br>8,29,30,32 | 1 P15399                                                         |
| 2189 | 1,2,5,6,8,2<br>6,27,32 | 3,4,7,25,2<br>8,29,30,31 | 3 P15399,Q5I0J9,Q9JJ50                                           |

|      |                        |                          |                                                           |
|------|------------------------|--------------------------|-----------------------------------------------------------|
| 2190 | 1,2,5,6,8,2<br>6,28,29 | 3,4,7,25,2<br>7,30,31,32 | 3 P00762,P52590,Q9QYP1                                    |
| 2191 | 1,2,5,6,8,2<br>6,28,30 | 3,4,7,25,2<br>7,29,31,32 | 3 P00762,Q5I0J9,Q99MH3                                    |
| 2192 | 1,2,5,6,8,2<br>6,28,31 | 3,4,7,25,2<br>7,29,30,32 | 2 P00762,Q63532                                           |
| 2193 | 1,2,5,6,8,2<br>6,28,32 | 3,4,7,25,2<br>7,29,30,31 | 1 Q99MH3                                                  |
| 2194 | 1,2,5,6,8,2<br>6,29,30 | 3,4,7,25,2<br>7,28,31,32 | 6 P00762,P29315,P52590,Q5I0J9,Q5RJR2,Q6IG05               |
| 2195 | 1,2,5,6,8,2<br>6,29,31 | 3,4,7,25,2<br>7,28,30,32 | 3 P00762,P52590,Q5RJR2                                    |
| 2196 | 1,2,5,6,8,2<br>6,29,32 | 3,4,7,25,2<br>7,28,30,31 | 4 P13432,P29315,P52590,Q68G31                             |
| 2197 | 1,2,5,6,8,2<br>6,30,31 | 3,4,7,25,2<br>7,28,29,32 | 7 O89117,Q5RJR2,Q63532,Q6IG05,Q8CGS4,Q99MH3,Q9Z2L0        |
| 2198 | 1,2,5,6,8,2<br>6,30,32 | 3,4,7,25,2<br>7,28,29,31 | 6 O89117,P29315,Q5I0J9,Q68G31,Q6IG05,Q99MH3               |
| 2199 | 1,2,5,6,8,2<br>6,31,32 | 3,4,7,25,2<br>7,28,29,30 | 4 O89117,Q62714,Q63532,Q99MH3                             |
| 2200 | 1,2,5,6,8,2<br>7,28,29 | 3,4,7,25,2<br>6,30,31,32 | 4 P25809,P52590,Q00715,Q9JI85                             |
| 2201 | 1,2,5,6,8,2<br>7,28,30 | 3,4,7,25,2<br>6,29,31,32 | 4 P15399,P19218,Q5I0J9,Q6IG05                             |
| 2202 | 1,2,5,6,8,2<br>7,28,31 | 3,4,7,25,2<br>6,29,30,32 | 1 Q63532                                                  |
| 2203 | 1,2,5,6,8,2<br>7,28,32 | 3,4,7,25,2<br>6,29,30,31 | 3 P15399,Q5I0J9,Q9JI85                                    |
| 2204 | 1,2,5,6,8,2<br>7,29,30 | 3,4,7,25,2<br>6,28,31,32 | 8 P00731,P19218,P29315,P52590,Q5I0J9,Q6IFU7,Q6IG05,Q6IMF3 |
| 2205 | 1,2,5,6,8,2<br>7,29,31 | 3,4,7,25,2<br>6,28,30,32 | 2 P00731,P52590                                           |
| 2206 | 1,2,5,6,8,2<br>7,29,32 | 3,4,7,25,2<br>6,28,30,31 | 4 P29315,P52590,Q5I0J9,Q9JJ50                             |
| 2207 | 1,2,5,6,8,2<br>7,30,31 | 3,4,7,25,2<br>6,28,29,32 | 6 P00731,P01039,P19218,P20646,Q5I0J9,Q6IG05               |
| 2208 | 1,2,5,6,8,2<br>7,30,32 | 3,4,7,25,2<br>6,28,29,31 | 7 P19218,P20646,P29315,Q03191,Q5I0J9,Q68G31,Q6IG05        |
| 2209 | 1,2,5,6,8,2<br>7,31,32 | 3,4,7,25,2<br>6,28,29,30 | 5 P01039,P20646,P23739,Q03191,Q5I0J9                      |

|      |                         |                          |   |                                                         |
|------|-------------------------|--------------------------|---|---------------------------------------------------------|
| 2210 | 1,2,5,6,8,2<br>8,29,30  | 3,4,7,25,2<br>6,27,31,32 | 5 | P00762,P19218,P29315,P52590,Q5I0J9                      |
| 2211 | 1,2,5,6,8,2<br>8,29,31  | 3,4,7,25,2<br>6,27,30,32 | 3 | P00762,P21674,P52590                                    |
| 2212 | 1,2,5,6,8,2<br>8,29,32  | 3,4,7,25,2<br>6,27,30,31 | 5 | P29315,P52590,Q5I0J9,Q9JI85,Q9QYP1                      |
| 2213 | 1,2,5,6,8,2<br>8,30,31  | 3,4,7,25,2<br>6,27,29,32 | 5 | P00762,P35745,Q5I0J9,Q63532,Q6IG05                      |
| 2214 | 1,2,5,6,8,2<br>8,30,32  | 3,4,7,25,2<br>6,27,29,31 | 5 | O89117,P19218,P29315,Q5I0J9,Q68G31                      |
| 2215 | 1,2,5,6,8,2<br>8,31,32  | 3,4,7,25,2<br>6,27,29,30 | 2 | O89117,Q63532                                           |
| 2216 | 1,2,5,6,8,2<br>9,30,31  | 3,4,7,25,2<br>6,27,28,32 | 5 | P36860,P52590,Q5I0J9,Q5RJR2,Q6IG05                      |
| 2217 | 1,2,5,6,8,2<br>9,30,32  | 3,4,7,25,2<br>6,27,28,31 | 7 | P20646,P29315,P36860,P52590,Q5I0J9,Q68G31,Q6IG05        |
| 2218 | 1,2,5,6,8,2<br>9,31,32  | 3,4,7,25,2<br>6,27,28,30 | 2 | P36860,P52590                                           |
| 2219 | 1,2,5,6,8,3<br>0,31,32  | 3,4,7,25,2<br>6,27,28,29 | 8 | O89117,P20646,P26342,P36860,Q5I0J9,Q63532,Q6IG05,Q6P6R2 |
| 2220 | 1,2,5,6,25,<br>26,27,28 | 3,4,7,8,29,<br>30,31,32  | 3 | P00714,P35280,P82471                                    |
| 2221 | 1,2,5,6,25,<br>26,27,29 | 3,4,7,8,28,<br>30,31,32  | 4 | O70417,P35280,P82471,Q9JJ50                             |
| 2222 | 1,2,5,6,25,<br>26,27,30 | 3,4,7,8,28,<br>29,31,32  | 6 | P01039,P21588,P82471,Q03191,Q9EQS0,Q9JJ50               |
| 2223 | 1,2,5,6,25,<br>26,27,31 | 3,4,7,8,28,<br>29,30,32  | 4 | O70417,P01039,P35280,Q03191                             |
| 2224 | 1,2,5,6,25,<br>26,27,32 | 3,4,7,8,28,<br>29,30,31  | 4 | P01039,P82471,Q03191,Q9JJ50                             |
| 2225 | 1,2,5,6,25,<br>26,28,29 | 3,4,7,8,27,<br>30,31,32  | 5 | O70417,P00714,P00762,P35280,P82471                      |
| 2226 | 1,2,5,6,25,<br>26,28,30 | 3,4,7,8,27,<br>29,31,32  | 4 | P00714,P00762,P82471,Q9EQS0                             |
| 2227 | 1,2,5,6,25,<br>26,28,31 | 3,4,7,8,27,<br>29,30,32  | 5 | O70417,P00714,P00762,P35280,Q9EQS0                      |
| 2228 | 1,2,5,6,25,<br>26,28,32 | 3,4,7,8,27,<br>29,30,31  | 5 | P82471,Q5PQL7,Q68G31,Q6IG02,Q9EQS0                      |
| 2229 | 1,2,5,6,25,<br>26,29,30 | 3,4,7,8,27,<br>28,31,32  | 5 | P00762,P22282,P82471,Q62902,Q9EQS0                      |



|      |                                              |                                                                          |
|------|----------------------------------------------|--------------------------------------------------------------------------|
| 2230 | 1,2,5,6,25, 3,4,7,8,27,<br>26,29,31 28,30,32 | 3 O70417,P00762,P35280                                                   |
| 2231 | 1,2,5,6,25, 3,4,7,8,27,<br>26,29,32 28,30,31 | 3 O70417,P82471,Q68G31                                                   |
| 2232 | 1,2,5,6,25, 3,4,7,8,27,<br>26,30,31 28,29,32 | 8 P22282,Q4G075,Q62902,Q6AYR9,Q812E4,Q99MH3,Q9EQS0,Q9Z2L0                |
| 2233 | 1,2,5,6,25, 3,4,7,8,27,<br>26,30,32 28,29,31 | 9 D3ZUC6,P00507,P82471,Q4G075,Q5PQL7,Q68G31,Q99MH3,Q9EQS0,Q9R168         |
| 2234 | 1,2,5,6,25, 3,4,7,8,27,<br>26,31,32 28,29,30 | 5 O70417,P00507,P97840,Q4G075,Q9EQS0                                     |
| 2235 | 1,2,5,6,25, 3,4,7,8,26,<br>27,28,29 30,31,32 | 3 P05539,P35280,P82471                                                   |
| 2236 | 1,2,5,6,25, 3,4,7,8,26,<br>27,28,30 29,31,32 | 2 P82471,Q5I0J9                                                          |
| 2237 | 1,2,5,6,25, 3,4,7,8,26,<br>27,28,31 29,30,32 | 2 P35280,Q03191                                                          |
| 2238 | 1,2,5,6,25, 3,4,7,8,26,<br>27,28,32 29,30,31 | 4 P82471,Q03191,Q62761;Q62762;Q62763,Q9QX74                              |
| 2239 | 1,2,5,6,25, 3,4,7,8,26,<br>27,29,30 28,31,32 | 4 O54728,P82471,Q5I0J9,Q923V8                                            |
| 2240 | 1,2,5,6,25, 3,4,7,8,26,<br>27,29,31 28,30,32 | 4 O54728,O70417,P35280,Q03191                                            |
| 2241 | 1,2,5,6,25, 3,4,7,8,26,<br>27,29,32 28,30,31 | 4 O70417,P82471,Q03191,Q9JJ50                                            |
| 2242 | 1,2,5,6,25, 3,4,7,8,26,<br>27,30,31 28,29,32 | 4 O54728,P01039,Q03191,Q6P6R2                                            |
| 2243 | 1,2,5,6,25, 3,4,7,8,26,<br>27,30,32 28,29,31 | 10 P01039,P20646,P82471,Q03191,Q5I0J9,Q63424,Q68G31,Q6P6R2,Q9QX74,Q9WTT6 |
| 2244 | 1,2,5,6,25, 3,4,7,8,26,<br>27,31,32 28,29,30 | 5 O70417,P01039,P20646,Q03191,Q6P6R2                                     |
| 2245 | 1,2,5,6,25, 3,4,7,8,26,<br>28,29,30 27,31,32 | 2 P00762,P82471                                                          |
| 2246 | 1,2,5,6,25, 3,4,7,8,26,<br>28,29,31 27,30,32 | 3 O70417,P00762,P35280                                                   |
| 2247 | 1,2,5,6,25, 3,4,7,8,26,<br>28,29,32 27,30,31 | 2 O70417,Q68G31                                                          |
| 2248 | 1,2,5,6,25, 3,4,7,8,26,<br>28,30,31 27,29,32 | 3 P00762,Q4G075,Q9EQS0                                                   |
| 2249 | 1,2,5,6,25, 3,4,7,8,26,<br>28,30,32 27,29,31 | 8 P82471,Q4G075,Q5I0J9,Q5PQL7,Q62975,Q68G31,Q9QX74,Q9WTT6                |

|      |                                              |                                                                                               |
|------|----------------------------------------------|-----------------------------------------------------------------------------------------------|
| 2250 | 1,2,5,6,25, 3,4,7,8,26,<br>28,31,32 27,29,30 | 3 O70417,Q4G075,Q9QX74                                                                        |
| 2251 | 1,2,5,6,25, 3,4,7,8,26,<br>29,30,31 27,28,32 | 6 O54728,P07150,P22282,P36860,Q62902,Q9QWN8                                                   |
| 2252 | 1,2,5,6,25, 3,4,7,8,26,<br>29,30,32 27,28,31 | 6 P07150,P36860,P82471,Q5I0J9,Q68G31,Q9WTT6                                                   |
| 2253 | 1,2,5,6,25, 3,4,7,8,26,<br>29,31,32 27,28,30 | 4 O70417,P07150,P36860,Q9WTT6                                                                 |
| 2254 | 1,2,5,6,25, 3,4,7,8,26,<br>30,31,32 27,28,29 | 13 P07150,P20646,P22273,P26342,P36860,P47967,P97840,Q4G075,Q6P6R2,Q9EQS0,Q9QX74,Q9WTT6,Q9WVK7 |
| 2255 | 1,2,5,6,26, 3,4,7,8,25,<br>27,28,29 30,31,32 | 7 O70417,P00762,P02625,P21588,P35280,P82471,Q9JJ50                                            |
| 2256 | 1,2,5,6,26, 3,4,7,8,25,<br>27,28,30 29,31,32 | 4 P00762,P21588,P82471,Q5I0J9                                                                 |
| 2257 | 1,2,5,6,26, 3,4,7,8,25,<br>27,28,31 29,30,32 | 3 O70417,P00762,P35280                                                                        |
| 2258 | 1,2,5,6,26, 3,4,7,8,25,<br>27,28,32 29,30,31 | 2 O70417,P82471                                                                               |
| 2259 | 1,2,5,6,26, 3,4,7,8,25,<br>27,29,30 28,31,32 | 6 P21588,P82471,Q5I0J9,Q811M5,Q923V8,Q9JJ50                                                   |
| 2260 | 1,2,5,6,26, 3,4,7,8,25,<br>27,29,31 28,30,32 | 3 O70417,P35280,Q9JJ50                                                                        |
| 2261 | 1,2,5,6,26, 3,4,7,8,25,<br>27,29,32 28,30,31 | 3 O70417,P82471,Q9JJ50                                                                        |
| 2262 | 1,2,5,6,26, 3,4,7,8,25,<br>27,30,31 28,29,32 | 2 P01039,P36860                                                                               |
| 2263 | 1,2,5,6,26, 3,4,7,8,25,<br>27,30,32 28,29,31 | 7 P01039,P36860,P82471,Q03191,Q5I0J9,Q68G31,Q9JJ50                                            |
| 2264 | 1,2,5,6,26, 3,4,7,8,25,<br>27,31,32 28,29,30 | 4 O70417,P01039,P36860,Q03191                                                                 |
| 2265 | 1,2,5,6,26, 3,4,7,8,25,<br>28,29,30 27,31,32 | 5 P00762,P01835,P21588,P29315,P82471                                                          |
| 2266 | 1,2,5,6,26, 3,4,7,8,25,<br>28,29,31 27,30,32 | 5 O70417,P00762,P01835,P02625,P35280                                                          |
| 2267 | 1,2,5,6,26, 3,4,7,8,25,<br>28,29,32 27,30,31 | 4 O70417,P01835,P14173,P29315                                                                 |
| 2268 | 1,2,5,6,26, 3,4,7,8,25,<br>28,30,31 27,29,32 | 3 P00762,Q4G075,Q9EQS0                                                                        |
| 2269 | 1,2,5,6,26, 3,4,7,8,25,<br>28,30,32 27,29,31 | 7 P29315,P82471,Q4G075,Q5I0J9,Q68G31,Q99MH3,Q9EQS0                                            |

|      |                                              |    |                                                                                            |
|------|----------------------------------------------|----|--------------------------------------------------------------------------------------------|
| 2270 | 1,2,5,6,26, 3,4,7,8,25,<br>28,31,32 27,29,30 | 4  | O70417,P14173,Q4G075,Q6IG02                                                                |
| 2271 | 1,2,5,6,26, 3,4,7,8,25,<br>29,30,31 27,28,32 | 7  | O70417,P00762,P01835,P0C0A9,P22282,P36860,Q9EQS0                                           |
| 2272 | 1,2,5,6,26, 3,4,7,8,25,<br>29,30,32 27,28,31 | 8  | O70417,P01835,P29315,P36860,P82471,Q5I0J9,Q68G31,Q9EQS0                                    |
| 2273 | 1,2,5,6,26, 3,4,7,8,25,<br>29,31,32 27,28,30 | 4  | O70417,P01835,P36860,Q5QE79                                                                |
| 2274 | 1,2,5,6,26, 3,4,7,8,25,<br>30,31,32 27,28,29 | 13 | O70417,O89117,P0C0A9,P20646,P26342,P36860,Q4G075,Q5I0J9,Q812E4,Q99MH3,Q9EQS0,Q9WTT6,Q9Z2L0 |
| 2275 | 1,2,5,6,27, 3,4,7,8,25,<br>28,29,30 26,31,32 | 7  | P00762,P19218,P21588,P29315,P82471,Q5I0J9,Q923V8                                           |
| 2276 | 1,2,5,6,27, 3,4,7,8,25,<br>28,29,31 26,30,32 | 3  | O70417,P00762,P35280                                                                       |
| 2277 | 1,2,5,6,27, 3,4,7,8,25,<br>28,29,32 26,30,31 | 6  | O35547,O70417,P29315,Q5I0J9,Q62761;Q62762;Q62763,Q6AY61                                    |
| 2278 | 1,2,5,6,27, 3,4,7,8,25,<br>28,30,31 26,29,32 | 1  | Q5I0J9                                                                                     |
| 2279 | 1,2,5,6,27, 3,4,7,8,25,<br>28,30,32 26,29,31 | 6  | P29315,P82471,Q03191,Q5I0J9,Q68G31,Q9QX74                                                  |
| 2280 | 1,2,5,6,27, 3,4,7,8,25,<br>28,31,32 26,29,30 | 3  | O70417,P22006,Q03191                                                                       |
| 2281 | 1,2,5,6,27, 3,4,7,8,25,<br>29,30,31 26,28,32 | 6  | O54728,O70417,P01039,P36860,Q5I0J9,Q923V8                                                  |
| 2282 | 1,2,5,6,27, 3,4,7,8,25,<br>29,30,32 26,28,31 | 8  | P29315,P36860,P82471,Q03191,Q5I0J9,Q68G31,Q923V8,Q9JJ50                                    |
| 2283 | 1,2,5,6,27, 3,4,7,8,25,<br>29,31,32 26,28,30 | 4  | O70417,P36860,P80299,Q03191                                                                |
| 2284 | 1,2,5,6,27, 3,4,7,8,25,<br>30,31,32 26,28,29 | 8  | P01039,P20646,P36860,Q03191,Q5I0J9,Q6P6R2,Q9QX74,Q9WTT6                                    |
| 2285 | 1,2,5,6,28, 3,4,7,8,25,<br>29,30,31 26,27,32 | 5  | O70417,P00762,P01835,P36860,Q5I0J9                                                         |
| 2286 | 1,2,5,6,28, 3,4,7,8,25,<br>29,30,32 26,27,31 | 5  | P01835,P29315,P36860,Q5I0J9,Q68G31                                                         |
| 2287 | 1,2,5,6,28, 3,4,7,8,25,<br>29,31,32 26,27,30 | 2  | O70417,P01835                                                                              |
| 2288 | 1,2,5,6,28, 3,4,7,8,25,<br>30,31,32 26,27,29 | 8  | O89117,P20646,P22006,P36860,Q4G075,Q5I0J9,Q9QX74,Q9WTT6                                    |
| 2289 | 1,2,5,6,29, 3,4,7,8,25,<br>30,31,32 26,27,28 | 9  | O70417,P01835,P07150,P20646,P26342,P36860,Q4G075,Q5I0J9,Q9WTT6                             |

|      |                        |                          |   |                                                         |
|------|------------------------|--------------------------|---|---------------------------------------------------------|
| 2290 | 1,2,5,7,8,2<br>5,26,27 | 3,4,6,28,2<br>9,30,31,32 | 4 | P22006,Q03191,Q66H69,Q9WTT6                             |
| 2291 | 1,2,5,7,8,2<br>5,26,28 | 3,4,6,27,2<br>9,30,31,32 | 3 | P00714,P00762,Q9WTT6                                    |
| 2292 | 1,2,5,7,8,2<br>5,26,29 | 3,4,6,27,2<br>8,30,31,32 | 4 | P06760,P22006,Q8VD89,Q9QX74                             |
| 2293 | 1,2,5,7,8,2<br>5,26,30 | 3,4,6,27,2<br>8,29,31,32 | 2 | P22006,Q6IG05                                           |
| 2294 | 1,2,5,7,8,2<br>5,26,31 | 3,4,6,27,2<br>8,29,30,32 | 1 | Q9Z0V6                                                  |
| 2295 | 1,2,5,7,8,2<br>5,26,32 | 3,4,6,27,2<br>8,29,30,31 | 0 |                                                         |
| 2296 | 1,2,5,7,8,2<br>5,27,28 | 3,4,6,26,2<br>9,30,31,32 | 2 | Q03191,Q66H69                                           |
| 2297 | 1,2,5,7,8,2<br>5,27,29 | 3,4,6,26,2<br>8,30,31,32 | 8 | P06760,P22006,P25809,P62804,Q00715,Q03191,Q4G075,Q66H69 |
| 2298 | 1,2,5,7,8,2<br>5,27,30 | 3,4,6,26,2<br>8,29,31,32 | 8 | P00731,P22006,Q03191,Q66H69,Q6IFU8,Q6IG05,Q6IMF3,Q6P6Q2 |
| 2299 | 1,2,5,7,8,2<br>5,27,31 | 3,4,6,26,2<br>8,29,30,32 | 2 | P23739,Q03191                                           |
| 2300 | 1,2,5,7,8,2<br>5,27,32 | 3,4,6,26,2<br>8,29,30,31 | 2 | Q03191,Q66H69                                           |
| 2301 | 1,2,5,7,8,2<br>5,28,29 | 3,4,6,26,2<br>7,30,31,32 | 4 | P00762,P06760,P22006,P62804                             |
| 2302 | 1,2,5,7,8,2<br>5,28,30 | 3,4,6,26,2<br>7,29,31,32 | 1 | Q6IG05                                                  |
| 2303 | 1,2,5,7,8,2<br>5,28,31 | 3,4,6,26,2<br>7,29,30,32 | 1 | Q811M5                                                  |
| 2304 | 1,2,5,7,8,2<br>5,28,32 | 3,4,6,26,2<br>7,29,30,31 | 1 | Q811M5                                                  |
| 2305 | 1,2,5,7,8,2<br>5,29,30 | 3,4,6,26,2<br>7,28,31,32 | 4 | P22006,P62804,Q6IG05,Q6IMF3                             |
| 2306 | 1,2,5,7,8,2<br>5,29,31 | 3,4,6,26,2<br>7,28,30,32 | 2 | P06760,Q8VD89                                           |
| 2307 | 1,2,5,7,8,2<br>5,29,32 | 3,4,6,26,2<br>7,28,30,31 | 0 |                                                         |
| 2308 | 1,2,5,7,8,2<br>5,30,31 | 3,4,6,26,2<br>7,28,29,32 | 2 | Q6IG05,Q6IMF3                                           |
| 2309 | 1,2,5,7,8,2<br>5,30,32 | 3,4,6,26,2<br>7,28,29,31 | 1 | Q6IG05                                                  |

|      |                        |                          |    |                                                                       |
|------|------------------------|--------------------------|----|-----------------------------------------------------------------------|
| 2310 | 1,2,5,7,8,2<br>5,31,32 | 3,4,6,26,2<br>7,28,29,30 | 2  | P21588,Q811M5                                                         |
| 2311 | 1,2,5,7,8,2<br>6,27,28 | 3,4,6,25,2<br>9,30,31,32 | 6  | P07150,P25809,P47967,Q5RLM2,Q66H69,Q9WTT6                             |
| 2312 | 1,2,5,7,8,2<br>6,27,29 | 3,4,6,25,2<br>8,30,31,32 | 10 | P06760,P22006,P25809,P62804,Q00715,Q4G075,Q66H69,Q9JJ50,Q9QX74,Q9WTT6 |
| 2313 | 1,2,5,7,8,2<br>6,27,30 | 3,4,6,25,2<br>8,29,31,32 | 4  | P00731,Q66H69,Q6IG05,Q8CJD3                                           |
| 2314 | 1,2,5,7,8,2<br>6,27,31 | 3,4,6,25,2<br>8,29,30,32 | 1  | Q66H69                                                                |
| 2315 | 1,2,5,7,8,2<br>6,27,32 | 3,4,6,25,2<br>8,29,30,31 | 3  | Q03191,Q66H69,Q9JJ50                                                  |
| 2316 | 1,2,5,7,8,2<br>6,28,29 | 3,4,6,25,2<br>7,30,31,32 | 8  | P00762,P06760,P21674,P47967,P62804,Q9QX74,Q9QYP1,Q9WTT6               |
| 2317 | 1,2,5,7,8,2<br>6,28,30 | 3,4,6,25,2<br>7,29,31,32 | 3  | P00762,P29315,P35745                                                  |
| 2318 | 1,2,5,7,8,2<br>6,28,31 | 3,4,6,25,2<br>7,29,30,32 | 3  | P00762,Q5RLM2,Q811M5                                                  |
| 2319 | 1,2,5,7,8,2<br>6,28,32 | 3,4,6,25,2<br>7,29,30,31 | 0  |                                                                       |
| 2320 | 1,2,5,7,8,2<br>6,29,30 | 3,4,6,25,2<br>7,28,31,32 | 5  | P00762,P06760,P22006,P29315,P62804                                    |
| 2321 | 1,2,5,7,8,2<br>6,29,31 | 3,4,6,25,2<br>7,28,30,32 | 3  | P00762,P06760,Q9QX74                                                  |
| 2322 | 1,2,5,7,8,2<br>6,29,32 | 3,4,6,25,2<br>7,28,30,31 | 2  | P06760,P29315                                                         |
| 2323 | 1,2,5,7,8,2<br>6,30,31 | 3,4,6,25,2<br>7,28,29,32 | 2  | P35745,Q6IG05                                                         |
| 2324 | 1,2,5,7,8,2<br>6,30,32 | 3,4,6,25,2<br>7,28,29,31 | 1  | P29315                                                                |
| 2325 | 1,2,5,7,8,2<br>6,31,32 | 3,4,6,25,2<br>7,28,29,30 | 1  | Q62714                                                                |
| 2326 | 1,2,5,7,8,2<br>7,28,29 | 3,4,6,25,2<br>6,30,31,32 | 9  | P06760,P25809,P29315,P47967,P62804,Q00715,Q4G075,Q66H69,Q812E4        |
| 2327 | 1,2,5,7,8,2<br>7,28,30 | 3,4,6,25,2<br>6,29,31,32 | 6  | P00731,P19218,P29315,P62804,Q66H69,Q6IG05                             |
| 2328 | 1,2,5,7,8,2<br>7,28,31 | 3,4,6,25,2<br>6,29,30,32 | 1  | Q66H69                                                                |
| 2329 | 1,2,5,7,8,2<br>7,28,32 | 3,4,6,25,2<br>6,29,30,31 | 5  | P25809,P29315,Q03191,Q66H69,Q812E4                                    |

|      |                         |                          |    |                                                                                            |
|------|-------------------------|--------------------------|----|--------------------------------------------------------------------------------------------|
| 2330 | 1,2,5,7,8,2<br>7,29,30  | 3,4,6,25,2<br>6,28,31,32 | 13 | P00731,P06760,P19218,P22006,P25809,P29315,P62804,Q4G075,Q66H69,Q6IFU8,Q6IG05,Q6IMF3,Q6P6Q2 |
| 2331 | 1,2,5,7,8,2<br>7,29,31  | 3,4,6,25,2<br>6,28,30,32 | 4  | P00731,P06760,Q4G075,Q66H69                                                                |
| 2332 | 1,2,5,7,8,2<br>7,29,32  | 3,4,6,25,2<br>6,28,30,31 | 5  | P25809,P29315,Q03191,Q66H69,Q9JJ50                                                         |
| 2333 | 1,2,5,7,8,2<br>7,30,31  | 3,4,6,25,2<br>6,28,29,32 | 6  | P00731,P19218,P23739,Q03191,Q6IG05,Q6IMF3                                                  |
| 2334 | 1,2,5,7,8,2<br>7,30,32  | 3,4,6,25,2<br>6,28,29,31 | 7  | P19218,P29315,P70549,Q03191,Q66H69,Q6IG05,Q6IMF3                                           |
| 2335 | 1,2,5,7,8,2<br>7,31,32  | 3,4,6,25,2<br>6,28,29,30 | 2  | P23739,Q03191                                                                              |
| 2336 | 1,2,5,7,8,2<br>8,29,30  | 3,4,6,25,2<br>6,27,31,32 | 5  | P00762,P21674,P29315,P35745,P62804                                                         |
| 2337 | 1,2,5,7,8,2<br>8,29,31  | 3,4,6,25,2<br>6,27,30,32 | 3  | P00762,P06760,P21674                                                                       |
| 2338 | 1,2,5,7,8,2<br>8,29,32  | 3,4,6,25,2<br>6,27,30,31 | 3  | P29315,P54921,Q812E4                                                                       |
| 2339 | 1,2,5,7,8,2<br>8,30,31  | 3,4,6,25,2<br>6,27,29,32 | 3  | P00762,P35745,Q6IG05                                                                       |
| 2340 | 1,2,5,7,8,2<br>8,30,32  | 3,4,6,25,2<br>6,27,29,31 | 1  | P29315                                                                                     |
| 2341 | 1,2,5,7,8,2<br>8,31,32  | 3,4,6,25,2<br>6,27,29,30 | 1  | Q811M5                                                                                     |
| 2342 | 1,2,5,7,8,2<br>9,30,31  | 3,4,6,25,2<br>6,27,28,32 | 5  | P35745,Q5RJR2,Q6IG05,Q6IMF3,Q9QWN8                                                         |
| 2343 | 1,2,5,7,8,2<br>9,30,32  | 3,4,6,25,2<br>6,27,28,31 | 2  | P29315,Q6IMF3                                                                              |
| 2344 | 1,2,5,7,8,2<br>9,31,32  | 3,4,6,25,2<br>6,27,28,30 | 0  |                                                                                            |
| 2345 | 1,2,5,7,8,3<br>0,31,32  | 3,4,6,25,2<br>6,27,28,29 | 2  | P26342,Q6IG05                                                                              |
| 2346 | 1,2,5,7,25,<br>26,27,28 | 3,4,6,8,29,<br>30,31,32  | 2  | P00714,Q03191                                                                              |
| 2347 | 1,2,5,7,25,<br>26,27,29 | 3,4,6,8,28,<br>30,31,32  | 4  | P02625,P22006,Q03191,Q9JJ50                                                                |
| 2348 | 1,2,5,7,25,<br>26,27,30 | 3,4,6,8,28,<br>29,31,32  | 1  | Q03191                                                                                     |
| 2349 | 1,2,5,7,25,<br>26,27,31 | 3,4,6,8,28,<br>29,30,32  | 1  | Q03191                                                                                     |

|      |                                              |                                             |
|------|----------------------------------------------|---------------------------------------------|
| 2350 | 1,2,5,7,25, 3,4,6,8,28,<br>26,27,32 29,30,31 | 2 Q03191,Q9JJ50                             |
| 2351 | 1,2,5,7,25, 3,4,6,8,27,<br>26,28,29 30,31,32 | 5 P00714,P00762,P02625,P22006,Q9QZK9        |
| 2352 | 1,2,5,7,25, 3,4,6,8,27,<br>26,28,30 29,31,32 | 3 P00714,P00762,Q9R168                      |
| 2353 | 1,2,5,7,25, 3,4,6,8,27,<br>26,28,31 29,30,32 | 2 P00714,P00762                             |
| 2354 | 1,2,5,7,25, 3,4,6,8,27,<br>26,28,32 29,30,31 | 2 Q6IG02,Q9R168                             |
| 2355 | 1,2,5,7,25, 3,4,6,8,27,<br>26,29,30 28,31,32 | 3 P22006,Q9QZK9,Q9R168                      |
| 2356 | 1,2,5,7,25, 3,4,6,8,27,<br>26,29,31 28,30,32 | 3 O70417,P00762,Q8VD89                      |
| 2357 | 1,2,5,7,25, 3,4,6,8,27,<br>26,29,32 28,30,31 | 2 O70417,Q9R168                             |
| 2358 | 1,2,5,7,25, 3,4,6,8,27,<br>26,30,31 28,29,32 | 6 P22282,Q62902,Q6AYR9,Q812E4,Q9EQS0,Q9WVK7 |
| 2359 | 1,2,5,7,25, 3,4,6,8,27,<br>26,30,32 28,29,31 | 3 Q9EQS0,Q9R168,Q9WVK7                      |
| 2360 | 1,2,5,7,25, 3,4,6,8,27,<br>26,31,32 28,29,30 | 2 O70417,Q9WVK7                             |
| 2361 | 1,2,5,7,25, 3,4,6,8,26,<br>27,28,29 30,31,32 | 4 P02625,P22006,Q03191,Q6AY61               |
| 2362 | 1,2,5,7,25, 3,4,6,8,26,<br>27,28,30 29,31,32 | 1 Q03191                                    |
| 2363 | 1,2,5,7,25, 3,4,6,8,26,<br>27,28,31 29,30,32 | 1 Q03191                                    |
| 2364 | 1,2,5,7,25, 3,4,6,8,26,<br>27,28,32 29,30,31 | 3 Q03191,Q62761;Q62762;Q62763,Q6AY61        |
| 2365 | 1,2,5,7,25, 3,4,6,8,26,<br>27,29,30 28,31,32 | 3 O54728,P22006,Q03191                      |
| 2366 | 1,2,5,7,25, 3,4,6,8,26,<br>27,29,31 28,30,32 | 3 O54728,O70417,Q03191                      |
| 2367 | 1,2,5,7,25, 3,4,6,8,26,<br>27,29,32 28,30,31 | 2 Q03191,Q6AY61                             |
| 2368 | 1,2,5,7,25, 3,4,6,8,26,<br>27,30,31 28,29,32 | 2 O54728,Q03191                             |
| 2369 | 1,2,5,7,25, 3,4,6,8,26,<br>27,30,32 28,29,31 | 4 P70549,Q03191,Q6P6R2,Q9R168               |

|      |                                              |                                      |
|------|----------------------------------------------|--------------------------------------|
| 2370 | 1,2,5,7,25, 3,4,6,8,26,<br>27,31,32 28,29,30 | 2 P23739,Q03191                      |
| 2371 | 1,2,5,7,25, 3,4,6,8,26,<br>28,29,30 27,31,32 | 1 P00762                             |
| 2372 | 1,2,5,7,25, 3,4,6,8,26,<br>28,29,31 27,30,32 | 2 O70417,P00762                      |
| 2373 | 1,2,5,7,25, 3,4,6,8,26,<br>28,29,32 27,30,31 | 2 P54921,Q6AY61                      |
| 2374 | 1,2,5,7,25, 3,4,6,8,26,<br>28,30,31 27,29,32 | 1 P00762                             |
| 2375 | 1,2,5,7,25, 3,4,6,8,26,<br>28,30,32 27,29,31 | 2 Q62975,Q9R168                      |
| 2376 | 1,2,5,7,25, 3,4,6,8,26,<br>28,31,32 27,29,30 | 1 Q811M5                             |
| 2377 | 1,2,5,7,25, 3,4,6,8,26,<br>29,30,31 27,28,32 | 3 O54728,P22282,Q9QWN8               |
| 2378 | 1,2,5,7,25, 3,4,6,8,26,<br>29,30,32 27,28,31 | 1 Q9R168                             |
| 2379 | 1,2,5,7,25, 3,4,6,8,26,<br>29,31,32 27,28,30 | 1 O70417                             |
| 2380 | 1,2,5,7,25, 3,4,6,8,26,<br>30,31,32 27,28,29 | 4 P22273,P26342,Q6P6R2,Q9WVK7        |
| 2381 | 1,2,5,7,26, 3,4,6,8,25,<br>27,28,29 30,31,32 | 4 O70417,P00762,P02625,P47967        |
| 2382 | 1,2,5,7,26, 3,4,6,8,25,<br>27,28,30 29,31,32 | 1 P21588                             |
| 2383 | 1,2,5,7,26, 3,4,6,8,25,<br>27,28,31 29,30,32 | 4 O70417,P00762,P02625,Q5RLM2        |
| 2384 | 1,2,5,7,26, 3,4,6,8,25,<br>27,28,32 29,30,31 | 3 P14173,Q03191,Q62761;Q62762;Q62763 |
| 2385 | 1,2,5,7,26, 3,4,6,8,25,<br>27,29,30 28,31,32 | 3 P21588,P29315,Q9JJ50               |
| 2386 | 1,2,5,7,26, 3,4,6,8,25,<br>27,29,31 28,30,32 | 2 O70417,P02625                      |
| 2387 | 1,2,5,7,26, 3,4,6,8,25,<br>27,29,32 28,30,31 | 5 O70417,P14173,P29315,Q03191,Q9JJ50 |
| 2388 | 1,2,5,7,26, 3,4,6,8,25,<br>27,30,31 28,29,32 | 1 Q03191                             |
| 2389 | 1,2,5,7,26, 3,4,6,8,25,<br>27,30,32 28,29,31 | 4 P29315,Q03191,Q9JJ50,Q9R168        |



|      |                                              |                                                                                |
|------|----------------------------------------------|--------------------------------------------------------------------------------|
| 2390 | 1,2,5,7,26, 3,4,6,8,25,<br>27,31,32 28,29,30 | 2 O70417,Q03191                                                                |
| 2391 | 1,2,5,7,26, 3,4,6,8,25,<br>28,29,30 27,31,32 | 3 P00762,P01835,P29315                                                         |
| 2392 | 1,2,5,7,26, 3,4,6,8,25,<br>28,29,31 27,30,32 | 5 O70417,P00762,P01835,P02625,P14173                                           |
| 2393 | 1,2,5,7,26, 3,4,6,8,25,<br>28,29,32 27,30,31 | 7 O70417,P01835,P02625,P14173,P29315,P54921,Q6AY61                             |
| 2394 | 1,2,5,7,26, 3,4,6,8,25,<br>28,30,31 27,29,32 | 1 P00762                                                                       |
| 2395 | 1,2,5,7,26, 3,4,6,8,25,<br>28,30,32 27,29,31 | 2 P29315,Q9R168                                                                |
| 2396 | 1,2,5,7,26, 3,4,6,8,25,<br>28,31,32 27,29,30 | 3 O70417,P14173,Q6IG02                                                         |
| 2397 | 1,2,5,7,26, 3,4,6,8,25,<br>29,30,31 27,28,32 | 5 O70417,P00762,P01835,P36860,Q9QWN8                                           |
| 2398 | 1,2,5,7,26, 3,4,6,8,25,<br>29,30,32 27,28,31 | 4 P01835,P29315,P36860,Q9R168                                                  |
| 2399 | 1,2,5,7,26, 3,4,6,8,25,<br>29,31,32 27,28,30 | 4 O70417,P01835,P14173,P36860                                                  |
| 2400 | 1,2,5,7,26, 3,4,6,8,25,<br>30,31,32 27,28,29 | 3 B2RYW9,P26342,P36860                                                         |
| 2401 | 1,2,5,7,27, 3,4,6,8,25,<br>28,29,30 26,31,32 | 2 P29315,P47967                                                                |
| 2402 | 1,2,5,7,27, 3,4,6,8,25,<br>28,29,31 26,30,32 | 4 O70417,P00762,P02625,Q6AY61                                                  |
| 2403 | 1,2,5,7,27, 3,4,6,8,25,<br>28,29,32 26,30,31 | 9 O70417,P14173,P29315,P47967,P54921,Q03191,Q62761;Q62762;Q62763,Q6AY61,Q812E4 |
| 2404 | 1,2,5,7,27, 3,4,6,8,25,<br>28,30,31 26,29,32 | 0                                                                              |
| 2405 | 1,2,5,7,27, 3,4,6,8,25,<br>28,30,32 26,29,31 | 4 P29315,P70549,Q03191,Q9R168                                                  |
| 2406 | 1,2,5,7,27, 3,4,6,8,25,<br>28,31,32 26,29,30 | 6 O70417,P14173,P80299,Q03191,Q62761;Q62762;Q62763,Q6AY61                      |
| 2407 | 1,2,5,7,27, 3,4,6,8,25,<br>29,30,31 26,28,32 | 2 O54728,P08649                                                                |
| 2408 | 1,2,5,7,27, 3,4,6,8,25,<br>29,30,32 26,28,31 | 4 P08649,P29315,Q03191,Q9R168                                                  |
| 2409 | 1,2,5,7,27, 3,4,6,8,25,<br>29,31,32 26,28,30 | 5 O70417,P08649,P80299,Q03191,Q6AY61                                           |

|      |                                              |                                             |
|------|----------------------------------------------|---------------------------------------------|
| 2410 | 1,2,5,7,27, 3,4,6,8,25,<br>30,31,32 26,28,29 | 5 P08649,P36860,P80299,Q03191,Q6P6R2        |
| 2411 | 1,2,5,7,28, 3,4,6,8,25,<br>29,30,31 26,27,32 | 2 P00762,P01835                             |
| 2412 | 1,2,5,7,28, 3,4,6,8,25,<br>29,30,32 26,27,31 | 4 P01835,P29315,P54921,Q9R168               |
| 2413 | 1,2,5,7,28, 3,4,6,8,25,<br>29,31,32 26,27,30 | 5 O70417,P01835,P14173,P54921,Q6AY61        |
| 2414 | 1,2,5,7,28, 3,4,6,8,25,<br>30,31,32 26,27,29 | 0                                           |
| 2415 | 1,2,5,7,29, 3,4,6,8,25,<br>30,31,32 26,27,28 | 6 O70417,P01835,P08649,P26342,P36860,P63081 |
| 2416 | 1,2,5,8,25, 3,4,6,7,29,<br>26,27,28 30,31,32 | 2 P00714,P26342                             |
| 2417 | 1,2,5,8,25, 3,4,6,7,28,<br>26,27,29 30,31,32 | 2 P22006,P25809                             |
| 2418 | 1,2,5,8,25, 3,4,6,7,28,<br>26,27,30 29,31,32 | 3 P22006,Q63617,Q6IG05                      |
| 2419 | 1,2,5,8,25, 3,4,6,7,28,<br>26,27,31 29,30,32 | 2 P00714,P23739                             |
| 2420 | 1,2,5,8,25, 3,4,6,7,28,<br>26,27,32 29,30,31 | 0                                           |
| 2421 | 1,2,5,8,25, 3,4,6,7,27,<br>26,28,29 30,31,32 | 2 P00714,P22006                             |
| 2422 | 1,2,5,8,25, 3,4,6,7,27,<br>26,28,30 29,31,32 | 2 P00714,P80299                             |
| 2423 | 1,2,5,8,25, 3,4,6,7,27,<br>26,28,31 29,30,32 | 1 P00714                                    |
| 2424 | 1,2,5,8,25, 3,4,6,7,27,<br>26,28,32 29,30,31 | 0                                           |
| 2425 | 1,2,5,8,25, 3,4,6,7,27,<br>26,29,30 28,31,32 | 2 P00714,P22006                             |
| 2426 | 1,2,5,8,25, 3,4,6,7,27,<br>26,29,31 28,30,32 | 1 P00714                                    |
| 2427 | 1,2,5,8,25, 3,4,6,7,27,<br>26,29,32 28,30,31 | 1 P13432                                    |
| 2428 | 1,2,5,8,25, 3,4,6,7,27,<br>26,30,31 28,29,32 | 4 P00714,P11598,Q63617,Q6IG05               |
| 2429 | 1,2,5,8,25, 3,4,6,7,27,<br>26,30,32 28,29,31 | 3 P00507,Q63617,Q68G31                      |

|      |                                              |                                                    |
|------|----------------------------------------------|----------------------------------------------------|
| 2430 | 1,2,5,8,25, 3,4,6,7,27,<br>26,31,32 28,29,30 | 2 P00507,Q63617                                    |
| 2431 | 1,2,5,8,25, 3,4,6,7,26,<br>27,28,29 30,31,32 | 2 P22006,P25809                                    |
| 2432 | 1,2,5,8,25, 3,4,6,7,26,<br>27,28,30 29,31,32 | 1 Q6IG05                                           |
| 2433 | 1,2,5,8,25, 3,4,6,7,26,<br>27,28,31 29,30,32 | 2 P00714,P23739                                    |
| 2434 | 1,2,5,8,25, 3,4,6,7,26,<br>27,28,32 29,30,31 | 1 Q9QWN8                                           |
| 2435 | 1,2,5,8,25, 3,4,6,7,26,<br>27,29,30 28,31,32 | 7 P00731,P22006,Q6IFU7,Q6IFU8,Q6IG05,Q6IMF3,Q6P6Q2 |
| 2436 | 1,2,5,8,25, 3,4,6,7,26,<br>27,29,31 28,30,32 | 0                                                  |
| 2437 | 1,2,5,8,25, 3,4,6,7,26,<br>27,29,32 28,30,31 | 0                                                  |
| 2438 | 1,2,5,8,25, 3,4,6,7,26,<br>27,30,31 28,29,32 | 4 P23739,Q63617,Q6IG05,Q6IMF3                      |
| 2439 | 1,2,5,8,25, 3,4,6,7,26,<br>27,30,32 28,29,31 | 4 P70549,Q03191,Q68G31,Q6IG05                      |
| 2440 | 1,2,5,8,25, 3,4,6,7,26,<br>27,31,32 28,29,30 | 3 P23739,Q03191,Q80WL1                             |
| 2441 | 1,2,5,8,25, 3,4,6,7,26,<br>28,29,30 27,31,32 | 2 P00714,P22006                                    |
| 2442 | 1,2,5,8,25, 3,4,6,7,26,<br>28,29,31 27,30,32 | 1 P00714                                           |
| 2443 | 1,2,5,8,25, 3,4,6,7,26,<br>28,29,32 27,30,31 | 0                                                  |
| 2444 | 1,2,5,8,25, 3,4,6,7,26,<br>28,30,31 27,29,32 | 2 P00714,Q6IG05                                    |
| 2445 | 1,2,5,8,25, 3,4,6,7,26,<br>28,30,32 27,29,31 | 1 Q68G31                                           |
| 2446 | 1,2,5,8,25, 3,4,6,7,26,<br>28,31,32 27,29,30 | 3 P21588,Q80WL1,Q811M5                             |
| 2447 | 1,2,5,8,25, 3,4,6,7,26,<br>29,30,31 27,28,32 | 3 P11598,Q6IG05,Q6IMF3                             |
| 2448 | 1,2,5,8,25, 3,4,6,7,26,<br>29,30,32 27,28,31 | 2 Q68G31,Q6IMF3                                    |
| 2449 | 1,2,5,8,25, 3,4,6,7,26,<br>29,31,32 27,28,30 | 2 P21588,Q80WL1                                    |

|      |                                              |                                      |
|------|----------------------------------------------|--------------------------------------|
| 2450 | 1,2,5,8,25, 3,4,6,7,26,<br>30,31,32 27,28,29 | 5 P20646,P97840,Q63617,Q6IG05,Q6P6R2 |
| 2451 | 1,2,5,8,26, 3,4,6,7,25,<br>27,28,29 30,31,32 | 1 P25809                             |
| 2452 | 1,2,5,8,26, 3,4,6,7,25,<br>27,28,30 29,31,32 | 1 Q6IG05                             |
| 2453 | 1,2,5,8,26, 3,4,6,7,25,<br>27,28,31 29,30,32 | 1 P00714                             |
| 2454 | 1,2,5,8,26, 3,4,6,7,25,<br>27,28,32 29,30,31 | 2 P25809,Q9QWN8                      |
| 2455 | 1,2,5,8,26, 3,4,6,7,25,<br>27,29,30 28,31,32 | 3 P00731,P22006,Q6IG05               |
| 2456 | 1,2,5,8,26, 3,4,6,7,25,<br>27,29,31 28,30,32 | 0                                    |
| 2457 | 1,2,5,8,26, 3,4,6,7,25,<br>27,29,32 28,30,31 | 2 P25809,Q9JJ50                      |
| 2458 | 1,2,5,8,26, 3,4,6,7,25,<br>27,30,31 28,29,32 | 1 Q6IG05                             |
| 2459 | 1,2,5,8,26, 3,4,6,7,25,<br>27,30,32 28,29,31 | 1 Q6IG05                             |
| 2460 | 1,2,5,8,26, 3,4,6,7,25,<br>27,31,32 28,29,30 | 1 P23739                             |
| 2461 | 1,2,5,8,26, 3,4,6,7,25,<br>28,29,30 27,31,32 | 1 P00714                             |
| 2462 | 1,2,5,8,26, 3,4,6,7,25,<br>28,29,31 27,30,32 | 2 O70417,P00714                      |
| 2463 | 1,2,5,8,26, 3,4,6,7,25,<br>28,29,32 27,30,31 | 1 Q9QYP1                             |
| 2464 | 1,2,5,8,26, 3,4,6,7,25,<br>28,30,31 27,29,32 | 1 P00714                             |
| 2465 | 1,2,5,8,26, 3,4,6,7,25,<br>28,30,32 27,29,31 | 1 Q68G31                             |
| 2466 | 1,2,5,8,26, 3,4,6,7,25,<br>28,31,32 27,29,30 | 0                                    |
| 2467 | 1,2,5,8,26, 3,4,6,7,25,<br>29,30,31 27,28,32 | 1 Q5RJR2                             |
| 2468 | 1,2,5,8,26, 3,4,6,7,25,<br>29,30,32 27,28,31 | 2 P29315,Q68G31                      |
| 2469 | 1,2,5,8,26, 3,4,6,7,25,<br>29,31,32 27,28,30 | 2 O70417,Q5QE79                      |

|      |                                              |                                                    |
|------|----------------------------------------------|----------------------------------------------------|
| 2470 | 1,2,5,8,26, 3,4,6,7,25,<br>30,31,32 27,28,29 | 3 P63081,Q5QE79,Q63617                             |
| 2471 | 1,2,5,8,27, 3,4,6,7,25,<br>28,29,30 26,31,32 | 6 P00731,P25809,P29315,Q6IFU7,Q6IG05,Q6IMF3        |
| 2472 | 1,2,5,8,27, 3,4,6,7,25,<br>28,29,31 26,30,32 | 1 P25809                                           |
| 2473 | 1,2,5,8,27, 3,4,6,7,25,<br>28,29,32 26,30,31 | 4 P25809,P29315,Q6AYR9,Q812E4                      |
| 2474 | 1,2,5,8,27, 3,4,6,7,25,<br>28,30,31 26,29,32 | 2 P23739,Q6IG05                                    |
| 2475 | 1,2,5,8,27, 3,4,6,7,25,<br>28,30,32 26,29,31 | 2 P29315,Q6IG05                                    |
| 2476 | 1,2,5,8,27, 3,4,6,7,25,<br>28,31,32 26,29,30 | 1 P23739                                           |
| 2477 | 1,2,5,8,27, 3,4,6,7,25,<br>29,30,31 26,28,32 | 4 P00731,Q6IFU8,Q6IG05,Q6IMF3                      |
| 2478 | 1,2,5,8,27, 3,4,6,7,25,<br>29,30,32 26,28,31 | 3 P29315,Q6IG05,Q6IMF3                             |
| 2479 | 1,2,5,8,27, 3,4,6,7,25,<br>29,31,32 26,28,30 | 0                                                  |
| 2480 | 1,2,5,8,27, 3,4,6,7,25,<br>30,31,32 26,28,29 | 3 P20646,P23739,Q6IG05                             |
| 2481 | 1,2,5,8,28, 3,4,6,7,25,<br>29,30,31 26,27,32 | 0                                                  |
| 2482 | 1,2,5,8,28, 3,4,6,7,25,<br>29,30,32 26,27,31 | 2 P29315,Q68G31                                    |
| 2483 | 1,2,5,8,28, 3,4,6,7,25,<br>29,31,32 26,27,30 | 1 O70417                                           |
| 2484 | 1,2,5,8,28, 3,4,6,7,25,<br>30,31,32 26,27,29 | 0                                                  |
| 2485 | 1,2,5,8,29, 3,4,6,7,25,<br>30,31,32 26,27,28 | 3 P36860,P63081,Q6IMF3                             |
| 2486 | 1,2,5,25,2 3,4,6,7,8,3<br>6,27,28,29 0,31,32 | 7 O70417,P00714,P02625,P35280,P82471,Q99041,Q9QZK9 |
| 2487 | 1,2,5,25,2 3,4,6,7,8,2<br>6,27,28,30 9,31,32 | 2 P00714,P82471                                    |
| 2488 | 1,2,5,25,2 3,4,6,7,8,2<br>6,27,28,31 9,30,32 | 4 O70417,P00714,P35280,Q99041                      |
| 2489 | 1,2,5,25,2 3,4,6,7,8,2<br>6,27,28,32 9,30,31 | 3 O70417,P82471,Q9QWN8                             |

|      |                                              |                                                                                                                    |
|------|----------------------------------------------|--------------------------------------------------------------------------------------------------------------------|
| 2490 | 1,2,5,25,2 3,4,6,7,8,2<br>6,27,29,30 8,31,32 | 5 P22006,P82471,Q63617,Q99041,Q9QZK9                                                                               |
| 2491 | 1,2,5,25,2 3,4,6,7,8,2<br>6,27,29,31 8,30,32 | 4 O70417,P35280,Q63617,Q99041                                                                                      |
| 2492 | 1,2,5,25,2 3,4,6,7,8,2<br>6,27,29,32 8,30,31 | 4 O70417,P82471,Q99041,Q9JJ50                                                                                      |
| 2493 | 1,2,5,25,2 3,4,6,7,8,2<br>6,27,30,31 8,29,32 | 8 P00714,P11598,P22273,P22282,Q5M8C6,Q62902,Q63617,Q99041                                                          |
| 2494 | 1,2,5,25,2 3,4,6,7,8,2<br>6,27,30,32 8,29,31 | 6 D3ZUC6,P21674,P22273,P82471,Q03191,Q63617                                                                        |
| 2495 | 1,2,5,25,2 3,4,6,7,8,2<br>6,27,31,32 8,29,30 | 7 O70417,P21674,P22273,P23739,Q03191,Q63617,Q99041                                                                 |
| 2496 | 1,2,5,25,2 3,4,6,7,8,2<br>6,28,29,30 7,31,32 | 6 P00714,P22273,P22282,P82471,Q99041,Q9QZK9                                                                        |
| 2497 | 1,2,5,25,2 3,4,6,7,8,2<br>6,28,29,31 7,30,32 | 6 O70417,P00714,P22273,P22282,P35280,Q99041                                                                        |
| 2498 | 1,2,5,25,2 3,4,6,7,8,2<br>6,28,29,32 7,30,31 | 4 O70417,P22273,Q99041,Q9QZK9                                                                                      |
| 2499 | 1,2,5,25,2 3,4,6,7,8,2<br>6,28,30,31 7,29,32 | 5 P00714,P22273,P22282,Q4G075,Q99041                                                                               |
| 2500 | 1,2,5,25,2 3,4,6,7,8,2<br>6,28,30,32 7,29,31 | 6 P22273,P82471,Q4G075,Q68G31,Q99041,Q9R168                                                                        |
| 2501 | 1,2,5,25,2 3,4,6,7,8,2<br>6,28,31,32 7,29,30 | 5 O70417,P22273,Q4G075,Q6IG02,Q99041                                                                               |
| 2502 | 1,2,5,25,2 3,4,6,7,8,2<br>6,29,30,31 7,28,32 | 10 O70417,P00714,P06761,P11598,P22273,P22282,Q5M8C6,Q62902,Q63617,Q99041                                           |
| 2503 | 1,2,5,25,2 3,4,6,7,8,2<br>6,29,30,32 7,28,31 | 11 D3ZUC6,O70417,P11598,P22273,P22282,P82471,Q63617,Q68G31,Q99041,Q9QZK9,Q9R168                                    |
| 2504 | 1,2,5,25,2 3,4,6,7,8,2<br>6,29,31,32 7,28,30 | 7 O70417,P00507,P19218,P22273,P22282,Q63617,Q99041                                                                 |
| 2505 | 1,2,5,25,2 3,4,6,7,8,2<br>6,30,31,32 7,28,29 | 16 D3ZUC6,O70417,P00507,P04636,P06761,P11598,P22273,P22282,P22283,Q4G075,Q63617,Q812E4,Q99041,Q9EQS0,Q9WVK7,Q9Z2L0 |
| 2506 | 1,2,5,25,2 3,4,6,7,8,2<br>7,28,29,30 6,31,32 | 1 P82471                                                                                                           |
| 2507 | 1,2,5,25,2 3,4,6,7,8,2<br>7,28,29,31 6,30,32 | 3 O70417,P35280,Q99041                                                                                             |
| 2508 | 1,2,5,25,2 3,4,6,7,8,2<br>7,28,29,32 6,30,31 | 4 O70417,Q62761;Q62762;Q62763,Q6AY61,Q99041                                                                        |
| 2509 | 1,2,5,25,2 3,4,6,7,8,2<br>7,28,30,31 6,29,32 | 4 P00714,P22273,P23739,Q99041                                                                                      |

|      |                                              |                                                                                        |
|------|----------------------------------------------|----------------------------------------------------------------------------------------|
| 2510 | 1,2,5,25,2 3,4,6,7,8,2<br>7,28,30,32 6,29,31 | 4 P22273,P82471,Q03191,Q9QX74                                                          |
| 2511 | 1,2,5,25,2 3,4,6,7,8,2<br>7,28,31,32 6,29,30 | 5 O70417,P22273,P23739,Q03191,Q99041                                                   |
| 2512 | 1,2,5,25,2 3,4,6,7,8,2<br>7,29,30,31 6,28,32 | 7 O54728,O70417,P11598,P22273,P22282,Q63617,Q99041                                     |
| 2513 | 1,2,5,25,2 3,4,6,7,8,2<br>7,29,30,32 6,28,31 | 4 P22273,Q03191,Q63617,Q99041                                                          |
| 2514 | 1,2,5,25,2 3,4,6,7,8,2<br>7,29,31,32 6,28,30 | 4 O70417,P22273,Q03191,Q99041                                                          |
| 2515 | 1,2,5,25,2 3,4,6,7,8,2<br>7,30,31,32 6,28,29 | 12 D3ZUC6,P06761,P11598,P21674,P22273,P23739,Q03191,Q63617,Q6P6R2,Q99041,Q9QX74,Q9WTT6 |
| 2516 | 1,2,5,25,2 3,4,6,7,8,2<br>8,29,30,31 6,27,32 | 5 O70417,P00714,P22273,P22282,Q99041                                                   |
| 2517 | 1,2,5,25,2 3,4,6,7,8,2<br>8,29,30,32 6,27,31 | 4 P22273,Q62894,Q68G31,Q99041                                                          |
| 2518 | 1,2,5,25,2 3,4,6,7,8,2<br>8,29,31,32 6,27,30 | 3 O70417,P22273,Q99041                                                                 |
| 2519 | 1,2,5,25,2 3,4,6,7,8,2<br>8,30,31,32 6,27,29 | 6 P22273,P22282,Q4G075,Q99041,Q9QX74,Q9WTT6                                            |
| 2520 | 1,2,5,25,2 3,4,6,7,8,2<br>9,30,31,32 6,27,28 | 11 D3ZUC6,O70417,P06761,P07150,P11598,P22273,P22282,P36860,Q63617,Q99041,Q9WTT6        |
| 2521 | 1,2,5,26,2 3,4,6,7,8,2<br>7,28,29,30 5,31,32 | 3 O70417,P21588,P82471                                                                 |
| 2522 | 1,2,5,26,2 3,4,6,7,8,2<br>7,28,29,31 5,30,32 | 3 O70417,P02625,P35280                                                                 |
| 2523 | 1,2,5,26,2 3,4,6,7,8,2<br>7,28,29,32 5,30,31 | 2 O70417,P02625                                                                        |
| 2524 | 1,2,5,26,2 3,4,6,7,8,2<br>7,28,30,31 5,29,32 | 2 O70417,P00714                                                                        |
| 2525 | 1,2,5,26,2 3,4,6,7,8,2<br>7,28,30,32 5,29,31 | 1 P82471                                                                               |
| 2526 | 1,2,5,26,2 3,4,6,7,8,2<br>7,28,31,32 5,29,30 | 1 O70417                                                                               |
| 2527 | 1,2,5,26,2 3,4,6,7,8,2<br>7,29,30,31 5,28,32 | 6 O70417,P22273,P22282,P36860,Q63617,Q99041                                            |
| 2528 | 1,2,5,26,2 3,4,6,7,8,2<br>7,29,30,32 5,28,31 | 5 O70417,P22273,P29315,P82471,Q9JJ50                                                   |
| 2529 | 1,2,5,26,2 3,4,6,7,8,2<br>7,29,31,32 5,28,30 | 3 O70417,P22273,Q99041                                                                 |

|      |                          |                          |    |                                                                              |
|------|--------------------------|--------------------------|----|------------------------------------------------------------------------------|
| 2530 | 1,2,5,26,2<br>7,30,31,32 | 3,4,6,7,8,2<br>5,28,29   | 5  | O70417,P22273,P36860,Q63617,Q9QW07                                           |
| 2531 | 1,2,5,26,2<br>8,29,30,31 | 3,4,6,7,8,2<br>5,27,32   | 8  | O70417,P00714,P00762,P22273,P22282,P98166,Q01984,Q99041                      |
| 2532 | 1,2,5,26,2<br>8,29,30,32 | 3,4,6,7,8,2<br>5,27,31   | 6  | O70417,P22273,P29315,P50115,Q62894,Q68G31                                    |
| 2533 | 1,2,5,26,2<br>8,29,31,32 | 3,4,6,7,8,2<br>5,27,30   | 4  | O70417,P22273,Q5QE79,Q99041                                                  |
| 2534 | 1,2,5,26,2<br>8,30,31,32 | 3,4,6,7,8,2<br>5,27,29   | 6  | O70417,P22273,P22282,P50115,Q4G075,Q5QE79                                    |
| 2535 | 1,2,5,26,2<br>9,30,31,32 | 3,4,6,7,8,2<br>5,27,28   | 11 | O70417,P06761,P22273,P22282,P36860,P50115,P63081,Q4G075,Q5QE79,Q63617,Q99041 |
| 2536 | 1,2,5,27,2<br>8,29,30,31 | 3,4,6,7,8,2<br>5,26,32   | 1  | O70417                                                                       |
| 2537 | 1,2,5,27,2<br>8,29,30,32 | 3,4,6,7,8,2<br>5,26,31   | 2  | O70417,P29315                                                                |
| 2538 | 1,2,5,27,2<br>8,29,31,32 | 3,4,6,7,8,2<br>5,26,30   | 3  | O70417,Q6AY61,Q99041                                                         |
| 2539 | 1,2,5,27,2<br>8,30,31,32 | 3,4,6,7,8,2<br>5,26,29   | 4  | O70417,P22273,P23739,Q9QX74                                                  |
| 2540 | 1,2,5,27,2<br>9,30,31,32 | 3,4,6,7,8,2<br>5,26,28   | 5  | O70417,P08649,P22273,P36860,Q99041                                           |
| 2541 | 1,2,5,28,2<br>9,30,31,32 | 3,4,6,7,8,2<br>5,26,27   | 6  | O70417,P22273,P36860,P50115,P63081,Q99041                                    |
| 2542 | 1,2,6,7,8,2<br>5,26,27   | 3,4,5,28,2<br>9,30,31,32 | 7  | P06911,P15399,P19629,P50115,P97580,Q30KJ2,Q66H69                             |
| 2543 | 1,2,6,7,8,2<br>5,26,28   | 3,4,5,27,2<br>9,30,31,32 | 9  | P00762,P02631,P06911,P08649,P12020,P19629,Q5GRG2,Q63598,Q9QW07               |
| 2544 | 1,2,6,7,8,2<br>5,26,29   | 3,4,5,27,2<br>8,30,31,32 | 2  | P06911,Q9QX74                                                                |
| 2545 | 1,2,6,7,8,2<br>5,26,30   | 3,4,5,27,2<br>8,29,31,32 | 2  | P02631,P06911                                                                |
| 2546 | 1,2,6,7,8,2<br>5,26,31   | 3,4,5,27,2<br>8,29,30,32 | 7  | O54858,P06911,P12020,P20766,P57113,Q5GRG2,Q63598                             |
| 2547 | 1,2,6,7,8,2<br>5,26,32   | 3,4,5,27,2<br>8,29,30,31 | 3  | P02631,P13432,Q68G31                                                         |
| 2548 | 1,2,6,7,8,2<br>5,27,28   | 3,4,5,26,2<br>9,30,31,32 | 10 | P02631,P06911,P12020,P19629,P50115,P63081,Q5GRG2,Q66H69,Q9JI85,Q9QW07        |
| 2549 | 1,2,6,7,8,2<br>5,27,29   | 3,4,5,26,2<br>8,30,31,32 | 8  | P02631,P06911,P19629,P62804,Q00715,Q4G075,Q5GRG2,Q66H69                      |



|      |                        |                          |    |                                                                              |
|------|------------------------|--------------------------|----|------------------------------------------------------------------------------|
| 2550 | 1,2,6,7,8,2<br>5,27,30 | 3,4,5,26,2<br>8,29,31,32 | 4  | P02631,P06911,P19629,Q6IG05                                                  |
| 2551 | 1,2,6,7,8,2<br>5,27,31 | 3,4,5,26,2<br>8,29,30,32 | 6  | P06911,P12020,P19629,P31044,Q5GRG2,Q62894                                    |
| 2552 | 1,2,6,7,8,2<br>5,27,32 | 3,4,5,26,2<br>8,29,30,31 | 3  | P02631,P06911,P19629                                                         |
| 2553 | 1,2,6,7,8,2<br>5,28,29 | 3,4,5,26,2<br>7,30,31,32 | 11 | P00762,P02631,P06911,P12020,P19629,P21674,P47727,P62804,Q5GRG2,Q9JI85,Q9QW07 |
| 2554 | 1,2,6,7,8,2<br>5,28,30 | 3,4,5,26,2<br>7,29,31,32 | 6  | P02631,P06911,P12020,P19629,Q5GRG2,Q9QW07                                    |
| 2555 | 1,2,6,7,8,2<br>5,28,31 | 3,4,5,26,2<br>7,29,30,32 | 7  | P02631,P06911,P12020,P19629,Q5GRG2,Q63532,Q63598                             |
| 2556 | 1,2,6,7,8,2<br>5,28,32 | 3,4,5,26,2<br>7,29,30,31 | 8  | P02631,P06911,P12020,P19629,Q5GRG2,Q68G31,Q9JI85,Q9QW07                      |
| 2557 | 1,2,6,7,8,2<br>5,29,30 | 3,4,5,26,2<br>7,28,31,32 | 4  | P02631,P06911,P12020,P62804                                                  |
| 2558 | 1,2,6,7,8,2<br>5,29,31 | 3,4,5,26,2<br>7,28,30,32 | 3  | P06911,P12020,Q5GRG2                                                         |
| 2559 | 1,2,6,7,8,2<br>5,29,32 | 3,4,5,26,2<br>7,28,30,31 | 4  | P02631,P06911,P13432,Q68G31                                                  |
| 2560 | 1,2,6,7,8,2<br>5,30,31 | 3,4,5,26,2<br>7,28,29,32 | 6  | O54858,P06911,P12020,P97840,Q5GRG2,Q63532                                    |
| 2561 | 1,2,6,7,8,2<br>5,30,32 | 3,4,5,26,2<br>7,28,29,31 | 2  | P02631,Q68G31                                                                |
| 2562 | 1,2,6,7,8,2<br>5,31,32 | 3,4,5,26,2<br>7,28,29,30 | 8  | O54858,P02631,P06911,P12020,P21588,P97840,Q5GRG2,Q63532                      |
| 2563 | 1,2,6,7,8,2<br>6,27,28 | 3,4,5,25,2<br>9,30,31,32 | 9  | P07150,P15399,P25809,P50280,Q63598,Q66H69,Q9JI85,Q9QW07,Q9WTT6               |
| 2564 | 1,2,6,7,8,2<br>6,27,29 | 3,4,5,25,2<br>8,30,31,32 | 7  | P15399,P25809,P62804,Q00715,Q66H69,Q9QX74,Q9WTT6                             |
| 2565 | 1,2,6,7,8,2<br>6,27,30 | 3,4,5,25,2<br>8,29,31,32 | 5  | P15399,P29315,P97580,Q30KJ2,Q66H69                                           |
| 2566 | 1,2,6,7,8,2<br>6,27,31 | 3,4,5,25,2<br>8,29,30,32 | 4  | P15399,P20766,Q62894,Q63598                                                  |
| 2567 | 1,2,6,7,8,2<br>6,27,32 | 3,4,5,25,2<br>8,29,30,31 | 4  | P15399,P29315,P50280,Q66H69                                                  |
| 2568 | 1,2,6,7,8,2<br>6,28,29 | 3,4,5,25,2<br>7,30,31,32 | 10 | P00762,P01835,P21674,P29315,P62804,Q6P6R2,Q9JI85,Q9QW07,Q9QX74,Q9WTT6        |
| 2569 | 1,2,6,7,8,2<br>6,28,30 | 3,4,5,25,2<br>7,29,31,32 | 3  | P00762,P29315,P35745                                                         |

|      |                        |                          |    |                                                                                                                 |
|------|------------------------|--------------------------|----|-----------------------------------------------------------------------------------------------------------------|
| 2570 | 1,2,6,7,8,2<br>6,28,31 | 3,4,5,25,2<br>7,29,30,32 | 8  | O89117,P00762,P06911,P12020,P57113,Q5GRG2,Q63532,Q63598                                                         |
| 2571 | 1,2,6,7,8,2<br>6,28,32 | 3,4,5,25,2<br>7,29,30,31 | 6  | O89117,P02631,P29315,Q6IG02,Q9JI85,Q9QW07                                                                       |
| 2572 | 1,2,6,7,8,2<br>6,29,30 | 3,4,5,25,2<br>7,28,31,32 | 4  | P00762,P01835,P29315,P62804                                                                                     |
| 2573 | 1,2,6,7,8,2<br>6,29,31 | 3,4,5,25,2<br>7,28,30,32 | 5  | P00762,P01835,P12020,Q63474,Q9QX74                                                                              |
| 2574 | 1,2,6,7,8,2<br>6,29,32 | 3,4,5,25,2<br>7,28,30,31 | 3  | P01835,P29315,Q68G31                                                                                            |
| 2575 | 1,2,6,7,8,2<br>6,30,31 | 3,4,5,25,2<br>7,28,29,32 | 4  | O89117,P35745,Q63532,Q99MH3                                                                                     |
| 2576 | 1,2,6,7,8,2<br>6,30,32 | 3,4,5,25,2<br>7,28,29,31 | 4  | O89117,P29315,Q68G31,Q99MH3                                                                                     |
| 2577 | 1,2,6,7,8,2<br>6,31,32 | 3,4,5,25,2<br>7,28,29,30 | 5  | O89117,P20766,P57113,Q63532,Q99MH3                                                                              |
| 2578 | 1,2,6,7,8,2<br>7,28,29 | 3,4,5,25,2<br>6,30,31,32 | 16 | P06911,P21674,P22283,P25809,P29315,P47727,P62804,Q00715,Q4G075,Q5GRG2,Q63617,Q66H69,Q6AYR9,Q812E4,Q9JI85,Q9QW07 |
| 2579 | 1,2,6,7,8,2<br>7,28,30 | 3,4,5,25,2<br>6,29,31,32 | 8  | P06911,P15399,P19218,P29315,P62804,Q66H69,Q6P6S4,Q9JI85                                                         |
| 2580 | 1,2,6,7,8,2<br>7,28,31 | 3,4,5,25,2<br>6,29,30,32 | 7  | iRT-Kit_WR_fusion,P06911,P12020,Q5GRG2,Q62894,Q63532,Q9JI85                                                     |
| 2581 | 1,2,6,7,8,2<br>7,28,32 | 3,4,5,25,2<br>6,29,30,31 | 12 | P02631,P05964,P08723,P15399,P22283,P29315,P50280,Q6AYR9,Q6P6S4,Q812E4,Q9JI85,Q9QW07                             |
| 2582 | 1,2,6,7,8,2<br>7,29,30 | 3,4,5,25,2<br>6,28,31,32 | 5  | P00731,P19218,P29315,P62804,Q66H69                                                                              |
| 2583 | 1,2,6,7,8,2<br>7,29,31 | 3,4,5,25,2<br>6,28,30,32 | 2  | P12020,Q5GRG2                                                                                                   |
| 2584 | 1,2,6,7,8,2<br>7,29,32 | 3,4,5,25,2<br>6,28,30,31 | 3  | P25809,P29315,Q66H69                                                                                            |
| 2585 | 1,2,6,7,8,2<br>7,30,31 | 3,4,5,25,2<br>6,28,29,32 | 1  | Q6IG05                                                                                                          |
| 2586 | 1,2,6,7,8,2<br>7,30,32 | 3,4,5,25,2<br>6,28,29,31 | 3  | P19218,P29315,Q68G31                                                                                            |
| 2587 | 1,2,6,7,8,2<br>7,31,32 | 3,4,5,25,2<br>6,28,29,30 | 2  | P80299,Q63532                                                                                                   |
| 2588 | 1,2,6,7,8,2<br>8,29,30 | 3,4,5,25,2<br>6,27,31,32 | 7  | P00762,P01835,P12020,P21674,P29315,P62804,Q9QW07                                                                |
| 2589 | 1,2,6,7,8,2<br>8,29,31 | 3,4,5,25,2<br>6,27,30,32 | 8  | P00762,P01835,P06911,P12020,P21674,Q5GRG2,Q63474,Q9JI85                                                         |

|      |                         |                          |    |                                                                              |
|------|-------------------------|--------------------------|----|------------------------------------------------------------------------------|
| 2590 | 1,2,6,7,8,2<br>8,29,32  | 3,4,5,25,2<br>6,27,30,31 | 11 | P01835,P02631,P08723,P21674,P29315,P30120,P47727,Q63617,Q812E4,Q9JI85,Q9QW07 |
| 2591 | 1,2,6,7,8,2<br>8,30,31  | 3,4,5,25,2<br>6,27,29,32 | 7  | O89117,P00762,P06911,P12020,P35745,Q5GRG2,Q63532                             |
| 2592 | 1,2,6,7,8,2<br>8,30,32  | 3,4,5,25,2<br>6,27,29,31 | 5  | O89117,P02631,P29315,Q68G31,Q9JI85                                           |
| 2593 | 1,2,6,7,8,2<br>8,31,32  | 3,4,5,25,2<br>6,27,29,30 | 5  | O89117,P12020,Q5GRG2,Q63532,Q9JI85                                           |
| 2594 | 1,2,6,7,8,2<br>9,30,31  | 3,4,5,25,2<br>6,27,28,32 | 3  | P01835,P12020,Q63474                                                         |
| 2595 | 1,2,6,7,8,2<br>9,30,32  | 3,4,5,25,2<br>6,27,28,31 | 3  | P01835,P29315,Q68G31                                                         |
| 2596 | 1,2,6,7,8,2<br>9,31,32  | 3,4,5,25,2<br>6,27,28,30 | 3  | P01835,P12020,Q63474                                                         |
| 2597 | 1,2,6,7,8,3<br>0,31,32  | 3,4,5,25,2<br>6,27,28,29 | 5  | B2RYW9,O89117,P15999,P26342,Q63532                                           |
| 2598 | 1,2,6,7,25,<br>26,27,28 | 3,4,5,8,29,<br>30,31,32  | 4  | O88797,P0DMW0;P0DMW1,P19629,P63081                                           |
| 2599 | 1,2,6,7,25,<br>26,27,29 | 3,4,5,8,28,<br>30,31,32  | 0  |                                                                              |
| 2600 | 1,2,6,7,25,<br>26,27,30 | 3,4,5,8,28,<br>29,31,32  | 0  |                                                                              |
| 2601 | 1,2,6,7,25,<br>26,27,31 | 3,4,5,8,28,<br>29,30,32  | 2  | O88797,Q62894                                                                |
| 2602 | 1,2,6,7,25,<br>26,27,32 | 3,4,5,8,28,<br>29,30,31  | 1  | Q9R168                                                                       |
| 2603 | 1,2,6,7,25,<br>26,28,29 | 3,4,5,8,27,<br>30,31,32  | 3  | P00762,P01835,P05539                                                         |
| 2604 | 1,2,6,7,25,<br>26,28,30 | 3,4,5,8,27,<br>29,31,32  | 4  | P00762,Q5PQL7,Q62975,Q9R168                                                  |
| 2605 | 1,2,6,7,25,<br>26,28,31 | 3,4,5,8,27,<br>29,30,32  | 4  | P00762,Q63598,Q6IFU7,Q6IG02                                                  |
| 2606 | 1,2,6,7,25,<br>26,28,32 | 3,4,5,8,27,<br>29,30,31  | 5  | Q5PQL7,Q62975,Q68G31,Q6IG02,Q9R168                                           |
| 2607 | 1,2,6,7,25,<br>26,29,30 | 3,4,5,8,27,<br>28,31,32  | 2  | P01835,Q9R168                                                                |
| 2608 | 1,2,6,7,25,<br>26,29,31 | 3,4,5,8,27,<br>28,30,32  | 2  | P00762,P01835                                                                |
| 2609 | 1,2,6,7,25,<br>26,29,32 | 3,4,5,8,27,<br>28,30,31  | 3  | P01835,Q68G31,Q9R168                                                         |

|      |                                              |                                             |
|------|----------------------------------------------|---------------------------------------------|
| 2610 | 1,2,6,7,25, 3,4,5,8,27,<br>26,30,31 28,29,32 | 2 P11442,Q9EQS0                             |
| 2611 | 1,2,6,7,25, 3,4,5,8,27,<br>26,30,32 28,29,31 | 6 D3ZUC6,P01835,Q5PQL7,Q68G31,Q9EQS0,Q9R168 |
| 2612 | 1,2,6,7,25, 3,4,5,8,27,<br>26,31,32 28,29,30 | 4 P57113,Q6IFU7,Q6IG02,Q9EQS0               |
| 2613 | 1,2,6,7,25, 3,4,5,8,26,<br>27,28,29 30,31,32 | 2 P05539,P0DMW0,P0DMW1                      |
| 2614 | 1,2,6,7,25, 3,4,5,8,26,<br>27,28,30 29,31,32 | 0                                           |
| 2615 | 1,2,6,7,25, 3,4,5,8,26,<br>27,28,31 29,30,32 | 3 O88797,P19629,Q5GRG2                      |
| 2616 | 1,2,6,7,25, 3,4,5,8,26,<br>27,28,32 29,30,31 | 3 P19629,Q5RJR2,Q62761,Q62762,Q62763        |
| 2617 | 1,2,6,7,25, 3,4,5,8,26,<br>27,29,30 28,31,32 | 2 O54728,P01835                             |
| 2618 | 1,2,6,7,25, 3,4,5,8,26,<br>27,29,31 28,30,32 | 2 O54728,P05539                             |
| 2619 | 1,2,6,7,25, 3,4,5,8,26,<br>27,29,32 28,30,31 | 1 P01835                                    |
| 2620 | 1,2,6,7,25, 3,4,5,8,26,<br>27,30,31 28,29,32 | 1 O54728                                    |
| 2621 | 1,2,6,7,25, 3,4,5,8,26,<br>27,30,32 28,29,31 | 2 Q68G31,Q9R168                             |
| 2622 | 1,2,6,7,25, 3,4,5,8,26,<br>27,31,32 28,29,30 | 1 P80299                                    |
| 2623 | 1,2,6,7,25, 3,4,5,8,26,<br>28,29,30 27,31,32 | 3 P00762,P01835,Q9R168                      |
| 2624 | 1,2,6,7,25, 3,4,5,8,26,<br>28,29,31 27,30,32 | 4 P00762,P01835,P05539,Q5GRG2               |
| 2625 | 1,2,6,7,25, 3,4,5,8,26,<br>28,29,32 27,30,31 | 3 P01835,Q68G31,Q9R168                      |
| 2626 | 1,2,6,7,25, 3,4,5,8,26,<br>28,30,31 27,29,32 | 1 P00762                                    |
| 2627 | 1,2,6,7,25, 3,4,5,8,26,<br>28,30,32 27,29,31 | 5 P01835,Q5PQL7,Q62975,Q68G31,Q9R168        |
| 2628 | 1,2,6,7,25, 3,4,5,8,26,<br>28,31,32 27,29,30 | 1 Q6IG02                                    |
| 2629 | 1,2,6,7,25, 3,4,5,8,26,<br>29,30,31 27,28,32 | 3 O54728,P01835,Q9QWN8                      |

|      |                                              |                                                           |
|------|----------------------------------------------|-----------------------------------------------------------|
| 2630 | 1,2,6,7,25, 3,4,5,8,26,<br>29,30,32 27,28,31 | 3 P01835,Q68G31,Q9R168                                    |
| 2631 | 1,2,6,7,25, 3,4,5,8,26,<br>29,31,32 27,28,30 | 1 P01835                                                  |
| 2632 | 1,2,6,7,25, 3,4,5,8,26,<br>30,31,32 27,28,29 | 8 D3ZUC6,P01835,P06760,P26342,P47967,P97840,Q6P6R2,Q9WVK7 |
| 2633 | 1,2,6,7,26, 3,4,5,8,25,<br>27,28,29 30,31,32 | 6 O88797,P00762,P01835,P02625,P05539,P0DMW0;P0DMW1        |
| 2634 | 1,2,6,7,26, 3,4,5,8,25,<br>27,28,30 29,31,32 | 3 P01835,P21588,P29315                                    |
| 2635 | 1,2,6,7,26, 3,4,5,8,25,<br>27,28,31 29,30,32 | 6 O88797,P00762,P01835,P0DMW0;P0DMW1,Q63598,Q6IG02        |
| 2636 | 1,2,6,7,26, 3,4,5,8,25,<br>27,28,32 29,30,31 | 5 O88797,P01835,P05964,P14173,Q6IG02                      |
| 2637 | 1,2,6,7,26, 3,4,5,8,25,<br>27,29,30 28,31,32 | 4 P01835,P21588,P29315,Q811M5                             |
| 2638 | 1,2,6,7,26, 3,4,5,8,25,<br>27,29,31 28,30,32 | 2 O88797,P01835                                           |
| 2639 | 1,2,6,7,26, 3,4,5,8,25,<br>27,29,32 28,30,31 | 3 P01835,P29315,Q9JJ50                                    |
| 2640 | 1,2,6,7,26, 3,4,5,8,25,<br>27,30,31 28,29,32 | 1 P01835                                                  |
| 2641 | 1,2,6,7,26, 3,4,5,8,25,<br>27,30,32 28,29,31 | 4 P01835,P29315,Q68G31,Q9R168                             |
| 2642 | 1,2,6,7,26, 3,4,5,8,25,<br>27,31,32 28,29,30 | 4 O88797,P01835,P80299,Q6IG02                             |
| 2643 | 1,2,6,7,26, 3,4,5,8,25,<br>28,29,30 27,31,32 | 4 P00762,P01835,P23739,P29315                             |
| 2644 | 1,2,6,7,26, 3,4,5,8,25,<br>28,29,31 27,30,32 | 3 P00762,P01835,Q63474                                    |
| 2645 | 1,2,6,7,26, 3,4,5,8,25,<br>28,29,32 27,30,31 | 4 P01835,P14173,P29315,Q6IG02                             |
| 2646 | 1,2,6,7,26, 3,4,5,8,25,<br>28,30,31 27,29,32 | 2 P00762,P01835                                           |
| 2647 | 1,2,6,7,26, 3,4,5,8,25,<br>28,30,32 27,29,31 | 5 O89117,P01835,P29315,Q68G31,Q9R168                      |
| 2648 | 1,2,6,7,26, 3,4,5,8,25,<br>28,31,32 27,29,30 | 7 O89117,P01835,P14173,P22006,Q6IFU7,Q6IFW6,Q6IG02        |
| 2649 | 1,2,6,7,26, 3,4,5,8,25,<br>29,30,31 27,28,32 | 3 P00762,P01835,P36860                                    |

|      |                                              |                                                                                                   |
|------|----------------------------------------------|---------------------------------------------------------------------------------------------------|
| 2650 | 1,2,6,7,26, 3,4,5,8,25,<br>29,30,32 27,28,31 | 6 P01835,P29315,P36376,P36860,Q68G31,Q9R168                                                       |
| 2651 | 1,2,6,7,26, 3,4,5,8,25,<br>29,31,32 27,28,30 | 3 O70417,P01835,P36860                                                                            |
| 2652 | 1,2,6,7,26, 3,4,5,8,25,<br>30,31,32 27,28,29 | 7 B2RYW9,O89117,P01835,P26342,P36860,Q99MH3,Q9EQS0                                                |
| 2653 | 1,2,6,7,27, 3,4,5,8,25,<br>28,29,30 26,31,32 | 3 P01835,P05539,P29315                                                                            |
| 2654 | 1,2,6,7,27, 3,4,5,8,25,<br>28,29,31 26,30,32 | 6 O88797,P00762,P01835,P05539,P0DMW0;P0DMW1,P80299                                                |
| 2655 | 1,2,6,7,27, 3,4,5,8,25,<br>28,29,32 26,30,31 | 11 O35547,P01835,P05539,P05964,P22283,P29315,P80299,Q62761;Q62762;Q62763,Q6AY61,Q6A<br>YR9,Q812E4 |
| 2656 | 1,2,6,7,27, 3,4,5,8,25,<br>28,30,31 26,29,32 | 1 P01835                                                                                          |
| 2657 | 1,2,6,7,27, 3,4,5,8,25,<br>28,30,32 26,29,31 | 4 P01835,P29315,Q68G31,Q9R168                                                                     |
| 2658 | 1,2,6,7,27, 3,4,5,8,25,<br>28,31,32 26,29,30 | 6 O88797,P01835,P05964,P22006,P80299,Q6IG02                                                       |
| 2659 | 1,2,6,7,27, 3,4,5,8,25,<br>29,30,31 26,28,32 | 3 O54728,P01835,P80299                                                                            |
| 2660 | 1,2,6,7,27, 3,4,5,8,25,<br>29,30,32 26,28,31 | 4 P01835,P29315,Q68G31,Q9R168                                                                     |
| 2661 | 1,2,6,7,27, 3,4,5,8,25,<br>29,31,32 26,28,30 | 2 P01835,P80299                                                                                   |
| 2662 | 1,2,6,7,27, 3,4,5,8,25,<br>30,31,32 26,28,29 | 3 P01835,P22006,P80299                                                                            |
| 2663 | 1,2,6,7,28, 3,4,5,8,25,<br>29,30,31 26,27,32 | 3 P00762,P01835,Q63474                                                                            |
| 2664 | 1,2,6,7,28, 3,4,5,8,25,<br>29,30,32 26,27,31 | 4 P01835,P29315,Q68G31,Q9R168                                                                     |
| 2665 | 1,2,6,7,28, 3,4,5,8,25,<br>29,31,32 26,27,30 | 3 P01835,P80299,Q63474                                                                            |
| 2666 | 1,2,6,7,28, 3,4,5,8,25,<br>30,31,32 26,27,29 | 4 O89117,P01835,P22006,P26342                                                                     |
| 2667 | 1,2,6,7,29, 3,4,5,8,25,<br>30,31,32 26,27,28 | 4 P01835,P26342,P36860,P80299                                                                     |
| 2668 | 1,2,6,8,25, 3,4,5,7,29,<br>26,27,28 30,31,32 | 5 P08649,P15399,P19629,Q30KJ2,Q5GRG2                                                              |
| 2669 | 1,2,6,8,25, 3,4,5,7,28,<br>26,27,29 30,31,32 | 3 P15399,P97580,Q30KJ2                                                                            |

|      |                                              |                                                    |
|------|----------------------------------------------|----------------------------------------------------|
| 2670 | 1,2,6,8,25, 3,4,5,7,28,<br>26,27,30 29,31,32 | 5 P15399,P97580,P97840,Q30KJ2,Q68G31               |
| 2671 | 1,2,6,8,25, 3,4,5,7,28,<br>26,27,31 29,30,32 | 4 P15399,P47967,P54921,P97840                      |
| 2672 | 1,2,6,8,25, 3,4,5,7,28,<br>26,27,32 29,30,31 | 5 P08649,P13432,P15399,P97840,Q68G31               |
| 2673 | 1,2,6,8,25, 3,4,5,7,27,<br>26,28,29 30,31,32 | 3 P08649,Q68G31,Q9QW07                             |
| 2674 | 1,2,6,8,25, 3,4,5,7,27,<br>26,28,30 29,31,32 | 2 P08649,Q68G31                                    |
| 2675 | 1,2,6,8,25, 3,4,5,7,27,<br>26,28,31 29,30,32 | 5 P00714,P08649,P97840,Q5GRG2,Q63598               |
| 2676 | 1,2,6,8,25, 3,4,5,7,27,<br>26,28,32 29,30,31 | 4 P08649,P13432,Q68G31,Q6IG02                      |
| 2677 | 1,2,6,8,25, 3,4,5,7,27,<br>26,29,30 28,31,32 | 1 Q68G31                                           |
| 2678 | 1,2,6,8,25, 3,4,5,7,27,<br>26,29,31 28,30,32 | 1 P97840                                           |
| 2679 | 1,2,6,8,25, 3,4,5,7,27,<br>26,29,32 28,30,31 | 4 P00507,P13432,P97840,Q68G31                      |
| 2680 | 1,2,6,8,25, 3,4,5,7,27,<br>26,30,31 28,29,32 | 4 P47967,P54921,P97840,Q99MH3                      |
| 2681 | 1,2,6,8,25, 3,4,5,7,27,<br>26,30,32 28,29,31 | 6 D3ZUC6,P00507,P47967,P97840,Q68G31,Q99MH3        |
| 2682 | 1,2,6,8,25, 3,4,5,7,27,<br>26,31,32 28,29,30 | 6 P00507,P13432,P47967,P97840,Q68G31,Q99MH3        |
| 2683 | 1,2,6,8,25, 3,4,5,7,26,<br>27,28,29 30,31,32 | 6 P19629,P47727,Q5GRG2,Q812E4,Q9JI85,Q9QW07        |
| 2684 | 1,2,6,8,25, 3,4,5,7,26,<br>27,28,30 29,31,32 | 4 P15399,P19629,Q5GRG2,Q68G31                      |
| 2685 | 1,2,6,8,25, 3,4,5,7,26,<br>27,28,31 29,30,32 | 4 P15399,P19629,P97840,Q5GRG2                      |
| 2686 | 1,2,6,8,25, 3,4,5,7,26,<br>27,28,32 29,30,31 | 7 P15399,P19629,Q5GRG2,Q68G31,Q6AYR9,Q9JI85,Q9QWN8 |
| 2687 | 1,2,6,8,25, 3,4,5,7,26,<br>27,29,30 28,31,32 | 1 Q68G31                                           |
| 2688 | 1,2,6,8,25, 3,4,5,7,26,<br>27,29,31 28,30,32 | 2 P97840,Q5GRG2                                    |
| 2689 | 1,2,6,8,25, 3,4,5,7,26,<br>27,29,32 28,30,31 | 2 P97840,Q68G31                                    |

|      |                                              |                                             |
|------|----------------------------------------------|---------------------------------------------|
| 2690 | 1,2,6,8,25, 3,4,5,7,26,<br>27,30,31 28,29,32 | 4 P47967,P54921,P97840,Q6IG05               |
| 2691 | 1,2,6,8,25, 3,4,5,7,26,<br>27,30,32 28,29,31 | 3 P15399,P97840,Q68G31                      |
| 2692 | 1,2,6,8,25, 3,4,5,7,26,<br>27,31,32 28,29,30 | 4 P19629,P47967,P97840,Q5GRG2               |
| 2693 | 1,2,6,8,25, 3,4,5,7,26,<br>28,29,30 27,31,32 | 2 Q5GRG2,Q68G31                             |
| 2694 | 1,2,6,8,25, 3,4,5,7,26,<br>28,29,31 27,30,32 | 2 P12020,Q5GRG2                             |
| 2695 | 1,2,6,8,25, 3,4,5,7,26,<br>28,29,32 27,30,31 | 5 P30120,Q5GRG2,Q68G31,Q9JI85,Q9QW07        |
| 2696 | 1,2,6,8,25, 3,4,5,7,26,<br>28,30,31 27,29,32 | 3 P12020,P97840,Q5GRG2                      |
| 2697 | 1,2,6,8,25, 3,4,5,7,26,<br>28,30,32 27,29,31 | 1 Q68G31                                    |
| 2698 | 1,2,6,8,25, 3,4,5,7,26,<br>28,31,32 27,29,30 | 4 P21588,P97840,Q5GRG2,Q68G31               |
| 2699 | 1,2,6,8,25, 3,4,5,7,26,<br>29,30,31 27,28,32 | 2 P47967,P97840                             |
| 2700 | 1,2,6,8,25, 3,4,5,7,26,<br>29,30,32 27,28,31 | 2 P97840,Q68G31                             |
| 2701 | 1,2,6,8,25, 3,4,5,7,26,<br>29,31,32 27,28,30 | 5 P13432,P21588,P47967,P97840,Q68G31        |
| 2702 | 1,2,6,8,25, 3,4,5,7,26,<br>30,31,32 27,28,29 | 6 D3ZUC6,O89117,P20646,P47967,P97840,Q68G31 |
| 2703 | 1,2,6,8,26, 3,4,5,7,25,<br>27,28,29 30,31,32 | 6 P15399,P25809,P47727,Q6P6R2,Q812E4,Q9JI85 |
| 2704 | 1,2,6,8,26, 3,4,5,7,25,<br>27,28,30 29,31,32 | 4 P15399,P97580,Q30KJ2,Q68G31               |
| 2705 | 1,2,6,8,26, 3,4,5,7,25,<br>27,28,31 29,30,32 | 1 P15399                                    |
| 2706 | 1,2,6,8,26, 3,4,5,7,25,<br>27,28,32 29,30,31 | 6 P15399,P50280,Q68G31,Q6AYR9,Q9JI85,Q9QWN8 |
| 2707 | 1,2,6,8,26, 3,4,5,7,25,<br>27,29,30 28,31,32 | 6 P15399,P29315,P97580,Q30KJ2,Q68G31,Q811M5 |
| 2708 | 1,2,6,8,26, 3,4,5,7,25,<br>27,29,31 28,30,32 | 2 P15399,Q63474                             |
| 2709 | 1,2,6,8,26, 3,4,5,7,25,<br>27,29,32 28,30,31 | 2 P15399,Q68G31                             |



|      |                                              |                                                                          |
|------|----------------------------------------------|--------------------------------------------------------------------------|
| 2710 | 1,2,6,8,26, 3,4,5,7,25,<br>27,30,31 28,29,32 | 4 P15399,P97580,P97840,Q30KJ2                                            |
| 2711 | 1,2,6,8,26, 3,4,5,7,25,<br>27,30,32 28,29,31 | 7 O89117,P15399,P29315,P97580,Q30KJ2,Q68G31,Q99MH3                       |
| 2712 | 1,2,6,8,26, 3,4,5,7,25,<br>27,31,32 28,29,30 | 3 O89117,P15399,P97840                                                   |
| 2713 | 1,2,6,8,26, 3,4,5,7,25,<br>28,29,30 27,31,32 | 2 P29315,Q68G31                                                          |
| 2714 | 1,2,6,8,26, 3,4,5,7,25,<br>28,29,31 27,30,32 | 1 Q63474                                                                 |
| 2715 | 1,2,6,8,26, 3,4,5,7,25,<br>28,29,32 27,30,31 | 4 P29315,P30120,Q68G31,Q9JI85                                            |
| 2716 | 1,2,6,8,26, 3,4,5,7,25,<br>28,30,31 27,29,32 | 2 O89117,Q99MH3                                                          |
| 2717 | 1,2,6,8,26, 3,4,5,7,25,<br>28,30,32 27,29,31 | 5 O89117,P15399,P29315,Q68G31,Q99MH3                                     |
| 2718 | 1,2,6,8,26, 3,4,5,7,25,<br>28,31,32 27,29,30 | 5 O89117,P22006,Q63532,Q6IG02,Q99MH3                                     |
| 2719 | 1,2,6,8,26, 3,4,5,7,25,<br>29,30,31 27,28,32 | 1 Q63474                                                                 |
| 2720 | 1,2,6,8,26, 3,4,5,7,25,<br>29,30,32 27,28,31 | 2 P29315,Q68G31                                                          |
| 2721 | 1,2,6,8,26, 3,4,5,7,25,<br>29,31,32 27,28,30 | 3 P97840,Q63474,Q68G31                                                   |
| 2722 | 1,2,6,8,26, 3,4,5,7,25,<br>30,31,32 27,28,29 | 5 B2RYW9,O89117,P97840,Q68G31,Q99MH3                                     |
| 2723 | 1,2,6,8,27, 3,4,5,7,25,<br>28,29,30 26,31,32 | 3 P15399,P29315,Q68G31                                                   |
| 2724 | 1,2,6,8,27, 3,4,5,7,25,<br>28,29,31 26,30,32 | 3 Q5GRG2,Q63474,Q9JI85                                                   |
| 2725 | 1,2,6,8,27, 3,4,5,7,25,<br>28,29,32 26,30,31 | 10 O35547,P15399,P25809,P29315,P30120,P47727,Q68G31,Q6AYR9,Q812E4,Q9JI85 |
| 2726 | 1,2,6,8,27, 3,4,5,7,25,<br>28,30,31 26,29,32 | 2 P15399,Q5GRG2                                                          |
| 2727 | 1,2,6,8,27, 3,4,5,7,25,<br>28,30,32 26,29,31 | 7 O89117,P15399,P29315,Q68G31,Q6AYR9,Q6P6S4,Q9JI85                       |
| 2728 | 1,2,6,8,27, 3,4,5,7,25,<br>28,31,32 26,29,30 | 6 O89117,P15399,P22006,Q5GRG2,Q6AYR9,Q9JI85                              |
| 2729 | 1,2,6,8,27, 3,4,5,7,25,<br>29,30,31 26,28,32 | 0                                                                        |

|      |                                              |                                      |
|------|----------------------------------------------|--------------------------------------|
| 2730 | 1,2,6,8,27, 3,4,5,7,25,<br>29,30,32 26,28,31 | 3 P15399,P29315,Q68G31               |
| 2731 | 1,2,6,8,27, 3,4,5,7,25,<br>29,31,32 26,28,30 | 2 P97840,Q63474                      |
| 2732 | 1,2,6,8,27, 3,4,5,7,25,<br>30,31,32 26,28,29 | 5 O89117,P15399,P20646,P97840,Q68G31 |
| 2733 | 1,2,6,8,28, 3,4,5,7,25,<br>29,30,31 26,27,32 | 1 Q63474                             |
| 2734 | 1,2,6,8,28, 3,4,5,7,25,<br>29,30,32 26,27,31 | 2 P29315,Q68G31                      |
| 2735 | 1,2,6,8,28, 3,4,5,7,25,<br>29,31,32 26,27,30 | 2 Q63474,Q9JI85                      |
| 2736 | 1,2,6,8,28, 3,4,5,7,25,<br>30,31,32 26,27,29 | 4 O89117,P22006,Q63532,Q68G31        |
| 2737 | 1,2,6,8,29, 3,4,5,7,25,<br>30,31,32 26,27,28 | 5 P20646,P36860,P97840,Q63474,Q68G31 |
| 2738 | 1,2,6,25,2 3,4,5,7,8,3<br>6,27,28,29 0,31,32 | 4 P05539,P0DMW0;P0DMW1,P35280,P82471 |
| 2739 | 1,2,6,25,2 3,4,5,7,8,2<br>6,27,28,30 9,31,32 | 2 P82471,Q68G31                      |
| 2740 | 1,2,6,25,2 3,4,5,7,8,2<br>6,27,28,31 9,30,32 | 2 P0DMW0;P0DMW1,P35280               |
| 2741 | 1,2,6,25,2 3,4,5,7,8,2<br>6,27,28,32 9,30,31 | 5 P82471,Q5RJR2,Q68G31,Q6IG02,Q9QWN8 |
| 2742 | 1,2,6,25,2 3,4,5,7,8,2<br>6,27,29,30 8,31,32 | 4 D3ZUC6,P82471,Q68G31,Q811M5        |
| 2743 | 1,2,6,25,2 3,4,5,7,8,2<br>6,27,29,31 8,30,32 | 3 O70417,P35280,P97840               |
| 2744 | 1,2,6,25,2 3,4,5,7,8,2<br>6,27,29,32 8,30,31 | 2 P82471,Q68G31                      |
| 2745 | 1,2,6,25,2 3,4,5,7,8,2<br>6,27,30,31 8,29,32 | 5 D3ZUC6,P06760,P47967,P54921,P97840 |
| 2746 | 1,2,6,25,2 3,4,5,7,8,2<br>6,27,30,32 8,29,31 | 5 D3ZUC6,P06760,P82471,P97840,Q68G31 |
| 2747 | 1,2,6,25,2 3,4,5,7,8,2<br>6,27,31,32 8,29,30 | 4 D3ZUC6,P06760,P47967,P97840        |
| 2748 | 1,2,6,25,2 3,4,5,7,8,2<br>6,28,29,30 7,31,32 | 2 P82471,Q68G31                      |
| 2749 | 1,2,6,25,2 3,4,5,7,8,2<br>6,28,29,31 7,30,32 | 2 O70417,P35280                      |

|      |                                              |                                                                                        |
|------|----------------------------------------------|----------------------------------------------------------------------------------------|
| 2750 | 1,2,6,25,2 3,4,5,7,8,2<br>6,28,29,32 7,30,31 | 2 P82471,Q68G31                                                                        |
| 2751 | 1,2,6,25,2 3,4,5,7,8,2<br>6,28,30,31 7,29,32 | 4 P00714,P06760,Q4G075,Q9EQS0                                                          |
| 2752 | 1,2,6,25,2 3,4,5,7,8,2<br>6,28,30,32 7,29,31 | 9 D3ZUC6,P06760,P82471,Q4G075,Q5PQL7,Q62975,Q68G31,Q9EQS0,Q9R168                       |
| 2753 | 1,2,6,25,2 3,4,5,7,8,2<br>6,28,31,32 7,29,30 | 5 P06760,P97840,Q4G075,Q68G31,Q6IG02                                                   |
| 2754 | 1,2,6,25,2 3,4,5,7,8,2<br>6,29,30,31 7,28,32 | 5 D3ZUC6,P01835,P22282,P47967,P97840                                                   |
| 2755 | 1,2,6,25,2 3,4,5,7,8,2<br>6,29,30,32 7,28,31 | 6 D3ZUC6,P00507,P01835,P82471,Q68G31,Q9R168                                            |
| 2756 | 1,2,6,25,2 3,4,5,7,8,2<br>6,29,31,32 7,28,30 | 7 D3ZUC6,O70417,P00507,P19218,P47967,P97840,Q68G31                                     |
| 2757 | 1,2,6,25,2 3,4,5,7,8,2<br>6,30,31,32 7,28,29 | 12 D3ZUC6,P00507,P04636,P06760,P22273,P47967,P97840,Q4G075,Q5I0D1,Q68G31,Q99MH3,Q9EQS0 |
| 2758 | 1,2,6,25,2 3,4,5,7,8,2<br>7,28,29,30 6,31,32 | 3 P05539,P82471,Q68G31                                                                 |
| 2759 | 1,2,6,25,2 3,4,5,7,8,2<br>7,28,29,31 6,30,32 | 2 P05539,P35280                                                                        |
| 2760 | 1,2,6,25,2 3,4,5,7,8,2<br>7,28,29,32 6,30,31 | 7 O35547,P00758,P05539,P49134,Q5RJR2,Q62761;Q62762;Q62763,Q68G31                       |
| 2761 | 1,2,6,25,2 3,4,5,7,8,2<br>7,28,30,31 6,29,32 | 2 P06760,Q9QX74                                                                        |
| 2762 | 1,2,6,25,2 3,4,5,7,8,2<br>7,28,30,32 6,29,31 | 5 P06760,P49134,P82471,Q68G31,Q9QX74                                                   |
| 2763 | 1,2,6,25,2 3,4,5,7,8,2<br>7,28,31,32 6,29,30 | 4 P06760,P49134,P97840,Q9QX74                                                          |
| 2764 | 1,2,6,25,2 3,4,5,7,8,2<br>7,29,30,31 6,28,32 | 3 D3ZUC6,O54728,P97840                                                                 |
| 2765 | 1,2,6,25,2 3,4,5,7,8,2<br>7,29,30,32 6,28,31 | 4 D3ZUC6,P82471,Q5RLM2,Q68G31                                                          |
| 2766 | 1,2,6,25,2 3,4,5,7,8,2<br>7,29,31,32 6,28,30 | 2 O70417,P97840                                                                        |
| 2767 | 1,2,6,25,2 3,4,5,7,8,2<br>7,30,31,32 6,28,29 | 9 D3ZUC6,P06760,P20646,P47967,P97840,Q68G31,Q6P6R2,Q9QX74,Q9WTT6                       |
| 2768 | 1,2,6,25,2 3,4,5,7,8,2<br>8,29,30,31 6,27,32 | 0                                                                                      |
| 2769 | 1,2,6,25,2 3,4,5,7,8,2<br>8,29,30,32 6,27,31 | 3 D3ZUC6,P01835,Q68G31                                                                 |

|      |                                              |                                                                                 |
|------|----------------------------------------------|---------------------------------------------------------------------------------|
| 2770 | 1,2,6,25,2 3,4,5,7,8,2<br>8,29,31,32 6,27,30 | 2 O70417,Q68G31                                                                 |
| 2771 | 1,2,6,25,2 3,4,5,7,8,2<br>8,30,31,32 6,27,29 | 11 D3ZUC6,P06760,P22006,P47967,P97840,Q4G075,Q5I0D1,Q62975,Q68G31,Q9QX74,Q9WTT6 |
| 2772 | 1,2,6,25,2 3,4,5,7,8,2<br>9,30,31,32 6,27,28 | 10 D3ZUC6,P01835,P07150,P22273,P36860,P47967,P97840,Q4G075,Q68G31,Q9WTT6        |
| 2773 | 1,2,6,26,2 3,4,5,7,8,2<br>7,28,29,30 5,31,32 | 5 P01835,P21588,P82471,Q68G31,Q811M5                                            |
| 2774 | 1,2,6,26,2 3,4,5,7,8,2<br>7,28,29,31 5,30,32 | 5 O70417,P01835,P0DMW0;P0DMW1,P35280,Q63474                                     |
| 2775 | 1,2,6,26,2 3,4,5,7,8,2<br>7,28,29,32 5,30,31 | 6 O35547,O70417,P00758,P01835,P82471,Q68G31                                     |
| 2776 | 1,2,6,26,2 3,4,5,7,8,2<br>7,28,30,31 5,29,32 | 0                                                                               |
| 2777 | 1,2,6,26,2 3,4,5,7,8,2<br>7,28,30,32 5,29,31 | 3 P06760,P82471,Q68G31                                                          |
| 2778 | 1,2,6,26,2 3,4,5,7,8,2<br>7,28,31,32 5,29,30 | 3 O70417,P22006,Q6IG02                                                          |
| 2779 | 1,2,6,26,2 3,4,5,7,8,2<br>7,29,30,31 5,28,32 | 3 P01835,P36860,Q811M5                                                          |
| 2780 | 1,2,6,26,2 3,4,5,7,8,2<br>7,29,30,32 5,28,31 | 5 P01835,P29315,P82471,Q68G31,Q811M5                                            |
| 2781 | 1,2,6,26,2 3,4,5,7,8,2<br>7,29,31,32 5,28,30 | 2 O70417,P01835                                                                 |
| 2782 | 1,2,6,26,2 3,4,5,7,8,2<br>7,30,31,32 5,28,29 | 5 P06760,P22006,P36860,P97840,Q68G31                                            |
| 2783 | 1,2,6,26,2 3,4,5,7,8,2<br>8,29,30,31 5,27,32 | 5 O70417,P00762,P01835,Q01984,Q63474                                            |
| 2784 | 1,2,6,26,2 3,4,5,7,8,2<br>8,29,30,32 5,27,31 | 3 P01835,P29315,Q68G31                                                          |
| 2785 | 1,2,6,26,2 3,4,5,7,8,2<br>8,29,31,32 5,27,30 | 6 O70417,P01835,Q05511,Q63474,Q6IFW6,Q6IG02                                     |
| 2786 | 1,2,6,26,2 3,4,5,7,8,2<br>8,30,31,32 5,27,29 | 7 O89117,P01835,P06760,P22006,Q4G075,Q68G31,Q99MH3                              |
| 2787 | 1,2,6,26,2 3,4,5,7,8,2<br>9,30,31,32 5,27,28 | 6 O70417,P01835,P36860,Q4G075,Q63474,Q68G31                                     |
| 2788 | 1,2,6,27,2 3,4,5,7,8,2<br>8,29,30,31 5,26,32 | 1 P01835                                                                        |
| 2789 | 1,2,6,27,2 3,4,5,7,8,2<br>8,29,30,32 5,26,31 | 5 P00758,P01835,P14562,P29315,Q68G31                                            |

|      |                                              |                                                               |
|------|----------------------------------------------|---------------------------------------------------------------|
| 2790 | 1,2,6,27,2 3,4,5,7,8,2<br>8,29,31,32 5,26,30 | 5 O35547,O70417,P01835,P80299,Q63474                          |
| 2791 | 1,2,6,27,2 3,4,5,7,8,2<br>8,30,31,32 5,26,29 | 4 P06760,P22006,Q68G31,Q9QX74                                 |
| 2792 | 1,2,6,27,2 3,4,5,7,8,2<br>9,30,31,32 5,26,28 | 5 P01835,P36860,P80299,Q68G31,Q9WTT6                          |
| 2793 | 1,2,6,28,2 3,4,5,7,8,2<br>9,30,31,32 5,26,27 | 7 O70417,P01835,P36860,Q4G075,Q63474,Q68G31,Q9WTT6            |
| 2794 | 1,2,7,8,25, 3,4,5,6,29,<br>26,27,28 30,31,32 | 7 iRT-Kit_WR_fusion,P25809,P36860,Q63598,Q66H69,Q9WTT6,Q9Z1F2 |
| 2795 | 1,2,7,8,25, 3,4,5,6,28,<br>26,27,29 30,31,32 | 6 P22006,P25809,Q4G075,Q66H69,Q9QX74,Q9WTT6                   |
| 2796 | 1,2,7,8,25, 3,4,5,6,28,<br>26,27,30 29,31,32 | 2 Q66H69,Q9Z1F2                                               |
| 2797 | 1,2,7,8,25, 3,4,5,6,28,<br>26,27,31 29,30,32 | 3 iRT-Kit_WR_fusion,Q63598,Q9Z0V6                             |
| 2798 | 1,2,7,8,25, 3,4,5,6,28,<br>26,27,32 29,30,31 | 1 Q66H69                                                      |
| 2799 | 1,2,7,8,25, 3,4,5,6,27,<br>26,28,29 30,31,32 | 4 P62804,Q6P6R2,Q9QX74,Q9WTT6                                 |
| 2800 | 1,2,7,8,25, 3,4,5,6,27,<br>26,28,30 29,31,32 | 1 Q9Z1F2                                                      |
| 2801 | 1,2,7,8,25, 3,4,5,6,27,<br>26,28,31 29,30,32 | 5 iRT-Kit_WR_fusion,P00714,Q63598,Q9Z0V6,Q9Z1F2               |
| 2802 | 1,2,7,8,25, 3,4,5,6,27,<br>26,28,32 29,30,31 | 0                                                             |
| 2803 | 1,2,7,8,25, 3,4,5,6,27,<br>26,29,30 28,31,32 | 1 P22006                                                      |
| 2804 | 1,2,7,8,25, 3,4,5,6,27,<br>26,29,31 28,30,32 | 2 Q8VD89,Q9QX74                                               |
| 2805 | 1,2,7,8,25, 3,4,5,6,27,<br>26,29,32 28,30,31 | 0                                                             |
| 2806 | 1,2,7,8,25, 3,4,5,6,27,<br>26,30,31 28,29,32 | 1 Q9Z1F2                                                      |
| 2807 | 1,2,7,8,25, 3,4,5,6,27,<br>26,30,32 28,29,31 | 1 Q68G31                                                      |
| 2808 | 1,2,7,8,25, 3,4,5,6,27,<br>26,31,32 28,29,30 | 0                                                             |
| 2809 | 1,2,7,8,25, 3,4,5,6,26,<br>27,28,29 30,31,32 | 8 P25809,P47727,P62804,Q00715,Q4G075,Q66H69,Q812E4,Q9WTT6     |

|      |                                              |                                                                                                   |
|------|----------------------------------------------|---------------------------------------------------------------------------------------------------|
| 2810 | 1,2,7,8,25, 3,4,5,6,26,<br>27,28,30 29,31,32 | 1 Q66H69                                                                                          |
| 2811 | 1,2,7,8,25, 3,4,5,6,26,<br>27,28,31 29,30,32 | 2 iRT-Kit_WR_fusion,Q63598                                                                        |
| 2812 | 1,2,7,8,25, 3,4,5,6,26,<br>27,28,32 29,30,31 | 3 Q66H69,Q6AYR9,Q812E4                                                                            |
| 2813 | 1,2,7,8,25, 3,4,5,6,26,<br>27,29,30 28,31,32 | 4 P22006,P62804,Q4G075,Q66H69                                                                     |
| 2814 | 1,2,7,8,25, 3,4,5,6,26,<br>27,29,31 28,30,32 | 2 Q66H69,Q8VD89                                                                                   |
| 2815 | 1,2,7,8,25, 3,4,5,6,26,<br>27,29,32 28,30,31 | 1 Q66H69                                                                                          |
| 2816 | 1,2,7,8,25, 3,4,5,6,26,<br>27,30,31 28,29,32 | 0                                                                                                 |
| 2817 | 1,2,7,8,25, 3,4,5,6,26,<br>27,30,32 28,29,31 | 1 Q68G31                                                                                          |
| 2818 | 1,2,7,8,25, 3,4,5,6,26,<br>27,31,32 28,29,30 | 1 P21588                                                                                          |
| 2819 | 1,2,7,8,25, 3,4,5,6,26,<br>28,29,30 27,31,32 | 1 P62804                                                                                          |
| 2820 | 1,2,7,8,25, 3,4,5,6,26,<br>28,29,31 27,30,32 | 0                                                                                                 |
| 2821 | 1,2,7,8,25, 3,4,5,6,26,<br>28,29,32 27,30,31 | 4 P08723,P30120,P47727,Q812E4                                                                     |
| 2822 | 1,2,7,8,25, 3,4,5,6,26,<br>28,30,31 27,29,32 | 0                                                                                                 |
| 2823 | 1,2,7,8,25, 3,4,5,6,26,<br>28,30,32 27,29,31 | 1 Q68G31                                                                                          |
| 2824 | 1,2,7,8,25, 3,4,5,6,26,<br>28,31,32 27,29,30 | 2 P21588,Q811M5                                                                                   |
| 2825 | 1,2,7,8,25, 3,4,5,6,26,<br>29,30,31 27,28,32 | 0                                                                                                 |
| 2826 | 1,2,7,8,25, 3,4,5,6,26,<br>29,30,32 27,28,31 | 1 Q68G31                                                                                          |
| 2827 | 1,2,7,8,25, 3,4,5,6,26,<br>29,31,32 27,28,30 | 1 P21588                                                                                          |
| 2828 | 1,2,7,8,25, 3,4,5,6,26,<br>30,31,32 27,28,29 | 2 B2RYW9,P21588                                                                                   |
| 2829 | 1,2,7,8,26, 3,4,5,6,25,<br>27,28,29 30,31,32 | 12 P0DMW0;P0DMW1,P25809,P47727,P62804,P97584,Q00715,Q4G075,Q66H69,Q6P6R2,Q812E4,<br>Q9QX74,Q9WTT6 |

|      |                                              |                                                    |
|------|----------------------------------------------|----------------------------------------------------|
| 2830 | 1,2,7,8,26, 3,4,5,6,25,<br>27,28,30 29,31,32 | 5 iRT - Kit_WR_fusion,P25809,Q66H69,Q9WTT6,Q9Z1F2  |
| 2831 | 1,2,7,8,26, 3,4,5,6,25,<br>27,28,31 29,30,32 | 5 iRT - Kit_WR_fusion,Q63598,Q66H69,Q9WTT6,Q9Z1F2  |
| 2832 | 1,2,7,8,26, 3,4,5,6,25,<br>27,28,32 29,30,31 | 6 P05964,P25809,Q66H69,Q6AYR9,Q812E4,Q9QWN8        |
| 2833 | 1,2,7,8,26, 3,4,5,6,25,<br>27,29,30 28,31,32 | 4 P25809,P29315,P62804,Q66H69                      |
| 2834 | 1,2,7,8,26, 3,4,5,6,25,<br>27,29,31 28,30,32 | 4 P25809,Q66H69,Q9QX74,Q9WTT6                      |
| 2835 | 1,2,7,8,26, 3,4,5,6,25,<br>27,29,32 28,30,31 | 3 P25809,P29315,Q66H69                             |
| 2836 | 1,2,7,8,26, 3,4,5,6,25,<br>27,30,31 28,29,32 | 1 Q9Z1F2                                           |
| 2837 | 1,2,7,8,26, 3,4,5,6,25,<br>27,30,32 28,29,31 | 2 P29315,Q66H69                                    |
| 2838 | 1,2,7,8,26, 3,4,5,6,25,<br>27,31,32 28,29,30 | 0                                                  |
| 2839 | 1,2,7,8,26, 3,4,5,6,25,<br>28,29,30 27,31,32 | 3 P21674,P29315,P62804                             |
| 2840 | 1,2,7,8,26, 3,4,5,6,25,<br>28,29,31 27,30,32 | 5 P21674,Q63474,Q6P6R2,Q9QX74,Q9WTT6               |
| 2841 | 1,2,7,8,26, 3,4,5,6,25,<br>28,29,32 27,30,31 | 4 P08723,P29315,P30120,Q812E4                      |
| 2842 | 1,2,7,8,26, 3,4,5,6,25,<br>28,30,31 27,29,32 | 3 P35745,Q63598,Q9Z1F2                             |
| 2843 | 1,2,7,8,26, 3,4,5,6,25,<br>28,30,32 27,29,31 | 2 P29315,Q68G31                                    |
| 2844 | 1,2,7,8,26, 3,4,5,6,25,<br>28,31,32 27,29,30 | 1 Q6IG02                                           |
| 2845 | 1,2,7,8,26, 3,4,5,6,25,<br>29,30,31 27,28,32 | 1 Q63474                                           |
| 2846 | 1,2,7,8,26, 3,4,5,6,25,<br>29,30,32 27,28,31 | 2 P29315,Q68G31                                    |
| 2847 | 1,2,7,8,26, 3,4,5,6,25,<br>29,31,32 27,28,30 | 1 Q63474                                           |
| 2848 | 1,2,7,8,26, 3,4,5,6,25,<br>30,31,32 27,28,29 | 2 B2RYW9,O89117                                    |
| 2849 | 1,2,7,8,27, 3,4,5,6,25,<br>28,29,30 26,31,32 | 7 P25809,P29315,P47727,P62804,Q00715,Q66H69,Q812E4 |

|      |                                              |                                                                  |
|------|----------------------------------------------|------------------------------------------------------------------|
| 2850 | 1,2,7,8,27, 3,4,5,6,25,<br>28,29,31 26,30,32 | 7 iRT-Kit_WR_fusion,P25809,P47727,Q00715,Q06000,Q66H69,Q812E4    |
| 2851 | 1,2,7,8,27, 3,4,5,6,25,<br>28,29,32 26,30,31 | 9 O35547,P08723,P25809,P29315,P30120,P47727,Q66H69,Q6AYR9,Q812E4 |
| 2852 | 1,2,7,8,27, 3,4,5,6,25,<br>28,30,31 26,29,32 | 1 iRT-Kit_WR_fusion                                              |
| 2853 | 1,2,7,8,27, 3,4,5,6,25,<br>28,30,32 26,29,31 | 3 P29315,Q6AYR9,Q812E4                                           |
| 2854 | 1,2,7,8,27, 3,4,5,6,25,<br>28,31,32 26,29,30 | 3 P05964,Q6AYR9,Q812E4                                           |
| 2855 | 1,2,7,8,27, 3,4,5,6,25,<br>29,30,31 26,28,32 | 1 P00731                                                         |
| 2856 | 1,2,7,8,27, 3,4,5,6,25,<br>29,30,32 26,28,31 | 2 P29315,Q66H69                                                  |
| 2857 | 1,2,7,8,27, 3,4,5,6,25,<br>29,31,32 26,28,30 | 1 P80299                                                         |
| 2858 | 1,2,7,8,27, 3,4,5,6,25,<br>30,31,32 26,28,29 | 0                                                                |
| 2859 | 1,2,7,8,28, 3,4,5,6,25,<br>29,30,31 26,27,32 | 4 P21674,P35745,P62804,Q63474                                    |
| 2860 | 1,2,7,8,28, 3,4,5,6,25,<br>29,30,32 26,27,31 | 3 P29315,Q68G31,Q812E4                                           |
| 2861 | 1,2,7,8,28, 3,4,5,6,25,<br>29,31,32 26,27,30 | 4 P21588,P30120,Q63474,Q812E4                                    |
| 2862 | 1,2,7,8,28, 3,4,5,6,25,<br>30,31,32 26,27,29 | 2 O89117,P35745                                                  |
| 2863 | 1,2,7,8,29, 3,4,5,6,25,<br>30,31,32 26,27,28 | 1 Q63474                                                         |
| 2864 | 1,2,7,25,2 3,4,5,6,8,3<br>6,27,28,29 0,31,32 | 2 P0DMW0;P0DMW1,P20646                                           |
| 2865 | 1,2,7,25,2 3,4,5,6,8,2<br>6,27,28,30 9,31,32 | 1 Q9R168                                                         |
| 2866 | 1,2,7,25,2 3,4,5,6,8,2<br>6,27,28,31 9,30,32 | 3 O88797,P0DMW0;P0DMW1,Q63598                                    |
| 2867 | 1,2,7,25,2 3,4,5,6,8,2<br>6,27,28,32 9,30,31 | 3 Q5RJR2,Q6IG02,Q9R168                                           |
| 2868 | 1,2,7,25,2 3,4,5,6,8,2<br>6,27,29,30 8,31,32 | 1 Q9R168                                                         |
| 2869 | 1,2,7,25,2 3,4,5,6,8,2<br>6,27,29,31 8,30,32 | 0                                                                |



|      |                                              |                                                                  |
|------|----------------------------------------------|------------------------------------------------------------------|
| 2870 | 1,2,7,25,2 3,4,5,6,8,2<br>6,27,29,32 8,30,31 | 1 Q9R168                                                         |
| 2871 | 1,2,7,25,2 3,4,5,6,8,2<br>6,27,30,31 8,29,32 | 0                                                                |
| 2872 | 1,2,7,25,2 3,4,5,6,8,2<br>6,27,30,32 8,29,31 | 2 D3ZUC6,Q9R168                                                  |
| 2873 | 1,2,7,25,2 3,4,5,6,8,2<br>6,27,31,32 8,29,30 | 0                                                                |
| 2874 | 1,2,7,25,2 3,4,5,6,8,2<br>6,28,29,30 7,31,32 | 1 Q9R168                                                         |
| 2875 | 1,2,7,25,2 3,4,5,6,8,2<br>6,28,29,31 7,30,32 | 1 P19218                                                         |
| 2876 | 1,2,7,25,2 3,4,5,6,8,2<br>6,28,29,32 7,30,31 | 2 P19218,Q9R168                                                  |
| 2877 | 1,2,7,25,2 3,4,5,6,8,2<br>6,28,30,31 7,29,32 | 1 P00714                                                         |
| 2878 | 1,2,7,25,2 3,4,5,6,8,2<br>6,28,30,32 7,29,31 | 3 Q62975,Q68G31,Q9R168                                           |
| 2879 | 1,2,7,25,2 3,4,5,6,8,2<br>6,28,31,32 7,29,30 | 3 P19218,Q6IFU7,Q6IG02                                           |
| 2880 | 1,2,7,25,2 3,4,5,6,8,2<br>6,29,30,31 7,28,32 | 2 P01835,P22282                                                  |
| 2881 | 1,2,7,25,2 3,4,5,6,8,2<br>6,29,30,32 7,28,31 | 4 D3ZUC6,P01835,Q68G31,Q9R168                                    |
| 2882 | 1,2,7,25,2 3,4,5,6,8,2<br>6,29,31,32 7,28,30 | 2 O70417,P19218                                                  |
| 2883 | 1,2,7,25,2 3,4,5,6,8,2<br>6,30,31,32 7,28,29 | 5 B2RYW9,D3ZUC6,P04636,P22273,Q9WVK7                             |
| 2884 | 1,2,7,25,2 3,4,5,6,8,2<br>7,28,29,30 6,31,32 | 0                                                                |
| 2885 | 1,2,7,25,2 3,4,5,6,8,2<br>7,28,29,31 6,30,32 | 2 O88797,P0DMW0;P0DMW1                                           |
| 2886 | 1,2,7,25,2 3,4,5,6,8,2<br>7,28,29,32 6,30,31 | 7 P00758,Q5RJR2,Q62761;Q62762;Q62763,Q6AY61,Q6AYR9,Q812E4,Q8CGS4 |
| 2887 | 1,2,7,25,2 3,4,5,6,8,2<br>7,28,30,31 6,29,32 | 0                                                                |
| 2888 | 1,2,7,25,2 3,4,5,6,8,2<br>7,28,30,32 6,29,31 | 2 Q5RJR2,Q9R168                                                  |
| 2889 | 1,2,7,25,2 3,4,5,6,8,2<br>7,28,31,32 6,29,30 | 2 O88797,Q5RJR2                                                  |

|      |                                              |                                                           |
|------|----------------------------------------------|-----------------------------------------------------------|
| 2890 | 1,2,7,25,2 3,4,5,6,8,2<br>7,29,30,31 6,28,32 | 1 O54728                                                  |
| 2891 | 1,2,7,25,2 3,4,5,6,8,2<br>7,29,30,32 6,28,31 | 2 D3ZUC6,Q9R168                                           |
| 2892 | 1,2,7,25,2 3,4,5,6,8,2<br>7,29,31,32 6,28,30 | 1 P80299                                                  |
| 2893 | 1,2,7,25,2 3,4,5,6,8,2<br>7,30,31,32 6,28,29 | 1 D3ZUC6                                                  |
| 2894 | 1,2,7,25,2 3,4,5,6,8,2<br>8,29,30,31 6,27,32 | 0                                                         |
| 2895 | 1,2,7,25,2 3,4,5,6,8,2<br>8,29,30,32 6,27,31 | 3 P01835,Q68G31,Q9R168                                    |
| 2896 | 1,2,7,25,2 3,4,5,6,8,2<br>8,29,31,32 6,27,30 | 1 P21588                                                  |
| 2897 | 1,2,7,25,2 3,4,5,6,8,2<br>8,30,31,32 6,27,29 | 1 Q62975                                                  |
| 2898 | 1,2,7,25,2 3,4,5,6,8,2<br>9,30,31,32 6,27,28 | 2 D3ZUC6,P01835                                           |
| 2899 | 1,2,7,26,2 3,4,5,6,8,2<br>7,28,29,30 5,31,32 | 2 P01835,P29315                                           |
| 2900 | 1,2,7,26,2 3,4,5,6,8,2<br>7,28,29,31 5,30,32 | 5 O70417,O88797,P01835,P02625,P0DMW0;P0DMW1               |
| 2901 | 1,2,7,26,2 3,4,5,6,8,2<br>7,28,29,32 5,30,31 | 6 P00758,P01835,P29315,Q62761;Q62762;Q62763,Q812E4,Q8CGS4 |
| 2902 | 1,2,7,26,2 3,4,5,6,8,2<br>7,28,30,31 5,29,32 | 0                                                         |
| 2903 | 1,2,7,26,2 3,4,5,6,8,2<br>7,28,30,32 5,29,31 | 2 P29315,Q9R168                                           |
| 2904 | 1,2,7,26,2 3,4,5,6,8,2<br>7,28,31,32 5,29,30 | 3 O88797,P05964,Q6IG02                                    |
| 2905 | 1,2,7,26,2 3,4,5,6,8,2<br>7,29,30,31 5,28,32 | 1 P01835                                                  |
| 2906 | 1,2,7,26,2 3,4,5,6,8,2<br>7,29,30,32 5,28,31 | 4 P01835,P29315,P36376,Q9R168                             |
| 2907 | 1,2,7,26,2 3,4,5,6,8,2<br>7,29,31,32 5,28,30 | 3 O70417,P01835,P80299                                    |
| 2908 | 1,2,7,26,2 3,4,5,6,8,2<br>7,30,31,32 5,28,29 | 0                                                         |
| 2909 | 1,2,7,26,2 3,4,5,6,8,2<br>8,29,30,31 5,27,32 | 3 P00762,P01835,Q63474                                    |

|      |                                              |                                                                  |
|------|----------------------------------------------|------------------------------------------------------------------|
| 2910 | 1,2,7,26,2 3,4,5,6,8,2<br>8,29,30,32 5,27,31 | 4 P01835,P29315,Q68G31,Q9R168                                    |
| 2911 | 1,2,7,26,2 3,4,5,6,8,2<br>8,29,31,32 5,27,30 | 5 O70417,P01835,P14173,Q63474,Q6IG02                             |
| 2912 | 1,2,7,26,2 3,4,5,6,8,2<br>8,30,31,32 5,27,29 | 1 P01835                                                         |
| 2913 | 1,2,7,26,2 3,4,5,6,8,2<br>9,30,31,32 5,27,28 | 2 P01835,P36860                                                  |
| 2914 | 1,2,7,27,2 3,4,5,6,8,2<br>8,29,30,31 5,26,32 | 3 P01835,P80299,Q06000                                           |
| 2915 | 1,2,7,27,2 3,4,5,6,8,2<br>8,29,30,32 5,26,31 | 6 P00758,P01835,P29315,Q63150,Q812E4,Q9R168                      |
| 2916 | 1,2,7,27,2 3,4,5,6,8,2<br>8,29,31,32 5,26,30 | 7 O70417,O88797,P01835,P80299,Q62761;Q62762;Q62763,Q6AY61,Q812E4 |
| 2917 | 1,2,7,27,2 3,4,5,6,8,2<br>8,30,31,32 5,26,29 | 1 P80299                                                         |
| 2918 | 1,2,7,27,2 3,4,5,6,8,2<br>9,30,31,32 5,26,28 | 3 P01835,P08649,P80299                                           |
| 2919 | 1,2,7,28,2 3,4,5,6,8,2<br>9,30,31,32 5,26,27 | 3 P01835,P80299,Q63474                                           |
| 2920 | 1,2,8,25,2 3,4,5,6,7,3<br>6,27,28,29 0,31,32 | 5 P25809,P26342,P47727,Q6P6R2,Q812E4                             |
| 2921 | 1,2,8,25,2 3,4,5,6,7,2<br>6,27,28,30 9,31,32 | 3 P00714,P15399,Q68G31                                           |
| 2922 | 1,2,8,25,2 3,4,5,6,7,2<br>6,27,28,31 9,30,32 | 3 iRT-Kit_WR_fusion,P00714,Q63598                                |
| 2923 | 1,2,8,25,2 3,4,5,6,7,2<br>6,27,28,32 9,30,31 | 5 P15399,Q5RJR2,Q68G31,Q6AYR9,Q9QWN8                             |
| 2924 | 1,2,8,25,2 3,4,5,6,7,2<br>6,27,29,30 8,31,32 | 2 P22006,Q68G31                                                  |
| 2925 | 1,2,8,25,2 3,4,5,6,7,2<br>6,27,29,31 8,30,32 | 1 P97840                                                         |
| 2926 | 1,2,8,25,2 3,4,5,6,7,2<br>6,27,29,32 8,30,31 | 1 Q68G31                                                         |
| 2927 | 1,2,8,25,2 3,4,5,6,7,2<br>6,27,30,31 8,29,32 | 3 P47967,P54921,P97840                                           |
| 2928 | 1,2,8,25,2 3,4,5,6,7,2<br>6,27,30,32 8,29,31 | 3 D3ZUC6,P97840,Q68G31                                           |
| 2929 | 1,2,8,25,2 3,4,5,6,7,2<br>6,27,31,32 8,29,30 | 2 P47967,P97840                                                  |

|      |                                              |                                                                  |
|------|----------------------------------------------|------------------------------------------------------------------|
| 2930 | 1,2,8,25,2 3,4,5,6,7,2<br>6,28,29,30 7,31,32 | 2 P00714,Q68G31                                                  |
| 2931 | 1,2,8,25,2 3,4,5,6,7,2<br>6,28,29,31 7,30,32 | 1 P00714                                                         |
| 2932 | 1,2,8,25,2 3,4,5,6,7,2<br>6,28,29,32 7,30,31 | 2 P30120,Q68G31                                                  |
| 2933 | 1,2,8,25,2 3,4,5,6,7,2<br>6,28,30,31 7,29,32 | 1 P00714                                                         |
| 2934 | 1,2,8,25,2 3,4,5,6,7,2<br>6,28,30,32 7,29,31 | 1 Q68G31                                                         |
| 2935 | 1,2,8,25,2 3,4,5,6,7,2<br>6,28,31,32 7,29,30 | 1 P97840                                                         |
| 2936 | 1,2,8,25,2 3,4,5,6,7,2<br>6,29,30,31 7,28,32 | 3 P47967,P50116,P97840                                           |
| 2937 | 1,2,8,25,2 3,4,5,6,7,2<br>6,29,30,32 7,28,31 | 4 D3ZUC6,P00507,P50116,Q68G31                                    |
| 2938 | 1,2,8,25,2 3,4,5,6,7,2<br>6,29,31,32 7,28,30 | 6 P00507,P19218,P21588,P47967,P50116,P97840                      |
| 2939 | 1,2,8,25,2 3,4,5,6,7,2<br>6,30,31,32 7,28,29 | 9 B2RYW9,D3ZUC6,P00507,P47967,P50116,P97840,Q5I0D1,Q63617,Q68G31 |
| 2940 | 1,2,8,25,2 3,4,5,6,7,2<br>7,28,29,30 6,31,32 | 2 Q68G31,Q812E4                                                  |
| 2941 | 1,2,8,25,2 3,4,5,6,7,2<br>7,28,29,31 6,30,32 | 0                                                                |
| 2942 | 1,2,8,25,2 3,4,5,6,7,2<br>7,28,29,32 6,30,31 | 7 P00758,P25809,P30120,P47727,Q68G31,Q6AYR9,Q812E4               |
| 2943 | 1,2,8,25,2 3,4,5,6,7,2<br>7,28,30,31 6,29,32 | 0                                                                |
| 2944 | 1,2,8,25,2 3,4,5,6,7,2<br>7,28,30,32 6,29,31 | 2 Q68G31,Q6AYR9                                                  |
| 2945 | 1,2,8,25,2 3,4,5,6,7,2<br>7,28,31,32 6,29,30 | 1 P21588                                                         |
| 2946 | 1,2,8,25,2 3,4,5,6,7,2<br>7,29,30,31 6,28,32 | 1 P97840                                                         |
| 2947 | 1,2,8,25,2 3,4,5,6,7,2<br>7,29,30,32 6,28,31 | 1 Q68G31                                                         |
| 2948 | 1,2,8,25,2 3,4,5,6,7,2<br>7,29,31,32 6,28,30 | 2 P21588,P97840                                                  |
| 2949 | 1,2,8,25,2 3,4,5,6,7,2<br>7,30,31,32 6,28,29 | 4 D3ZUC6,P47967,P97840,Q68G31                                    |

|      |                                              |                                                           |
|------|----------------------------------------------|-----------------------------------------------------------|
| 2950 | 1,2,8,25,2 3,4,5,6,7,2<br>8,29,30,31 6,27,32 | 1 P50116                                                  |
| 2951 | 1,2,8,25,2 3,4,5,6,7,2<br>8,29,30,32 6,27,31 | 2 P50116,Q68G31                                           |
| 2952 | 1,2,8,25,2 3,4,5,6,7,2<br>8,29,31,32 6,27,30 | 2 P21588,P50116                                           |
| 2953 | 1,2,8,25,2 3,4,5,6,7,2<br>8,30,31,32 6,27,29 | 5 P21588,P47967,P50116,P97840,Q68G31                      |
| 2954 | 1,2,8,25,2 3,4,5,6,7,2<br>9,30,31,32 6,27,28 | 6 D3ZUC6,P21588,P47967,P50116,P97840,Q68G31               |
| 2955 | 1,2,8,26,2 3,4,5,6,7,2<br>7,28,29,30 5,31,32 | 1 P25809                                                  |
| 2956 | 1,2,8,26,2 3,4,5,6,7,2<br>7,28,29,31 5,30,32 | 3 P25809,Q63474,Q6P6R2                                    |
| 2957 | 1,2,8,26,2 3,4,5,6,7,2<br>7,28,29,32 5,30,31 | 8 P00758,P25809,P30120,P47727,Q68G31,Q6AYR9,Q812E4,Q9QWN8 |
| 2958 | 1,2,8,26,2 3,4,5,6,7,2<br>7,28,30,31 5,29,32 | 0                                                         |
| 2959 | 1,2,8,26,2 3,4,5,6,7,2<br>7,28,30,32 5,29,31 | 4 P15399,Q68G31,Q6AYR9,Q9QWN8                             |
| 2960 | 1,2,8,26,2 3,4,5,6,7,2<br>7,28,31,32 5,29,30 | 1 Q9QWN8                                                  |
| 2961 | 1,2,8,26,2 3,4,5,6,7,2<br>7,29,30,31 5,28,32 | 0                                                         |
| 2962 | 1,2,8,26,2 3,4,5,6,7,2<br>7,29,30,32 5,28,31 | 2 P29315,Q68G31                                           |
| 2963 | 1,2,8,26,2 3,4,5,6,7,2<br>7,29,31,32 5,28,30 | 1 Q63474                                                  |
| 2964 | 1,2,8,26,2 3,4,5,6,7,2<br>7,30,31,32 5,28,29 | 0                                                         |
| 2965 | 1,2,8,26,2 3,4,5,6,7,2<br>8,29,30,31 5,27,32 | 2 P50116,Q63474                                           |
| 2966 | 1,2,8,26,2 3,4,5,6,7,2<br>8,29,30,32 5,27,31 | 3 P29315,P50116,Q68G31                                    |
| 2967 | 1,2,8,26,2 3,4,5,6,7,2<br>8,29,31,32 5,27,30 | 4 P50116,Q5QE79,Q63474,Q99376                             |
| 2968 | 1,2,8,26,2 3,4,5,6,7,2<br>8,30,31,32 5,27,29 | 3 O89117,P50116,Q68G31                                    |
| 2969 | 1,2,8,26,2 3,4,5,6,7,2<br>9,30,31,32 5,27,28 | 5 P50116,P63081,Q5QE79,Q63474,Q68G31                      |

|      |                               |                        |                                                           |
|------|-------------------------------|------------------------|-----------------------------------------------------------|
| 2970 | 1,2,8,27,2<br>8,29,30,31      | 3,4,5,6,7,2<br>5,26,32 | 1 Q63474                                                  |
| 2971 | 1,2,8,27,2<br>8,29,30,32      | 3,4,5,6,7,2<br>5,26,31 | 5 P29315,Q63150,Q68G31,Q6AYR9,Q812E4                      |
| 2972 | 1,2,8,27,2<br>8,29,31,32      | 3,4,5,6,7,2<br>5,26,30 | 4 P47727,Q63474,Q6AYR9,Q812E4                             |
| 2973 | 1,2,8,27,2<br>8,30,31,32      | 3,4,5,6,7,2<br>5,26,29 | 0                                                         |
| 2974 | 1,2,8,27,2<br>9,30,31,32      | 3,4,5,6,7,2<br>5,26,28 | 1 Q63474                                                  |
| 2975 | 1,2,8,28,2<br>9,30,31,32      | 3,4,5,6,7,2<br>5,26,27 | 3 P50116,Q63474,Q68G31                                    |
| 2976 | 1,2,25,26,<br>27,28,29,3<br>0 | 3,4,5,6,7,8<br>,31,32  | 3 P00714,P82471,Q99041                                    |
| 2977 | 1,2,25,26,<br>27,28,29,3<br>1 | 3,4,5,6,7,8<br>,30,32  | 6 O70417,P00714,P0DMW0;P0DMW1,P19218,P35280,Q99041        |
| 2978 | 1,2,25,26,<br>27,28,29,3<br>2 | 3,4,5,6,7,8<br>,30,31  | 8 O70417,P00758,P49134,P82471,Q5RJR2,Q68G31,Q8CGS4,Q99041 |
| 2979 | 1,2,25,26,<br>27,28,30,3<br>1 | 3,4,5,6,7,8<br>,29,32  | 3 P00714,P22273,Q99041                                    |
| 2980 | 1,2,25,26,<br>27,28,30,3<br>2 | 3,4,5,6,7,8<br>,29,31  | 7 D3ZUC6,P22273,P49134,P82471,Q5RJR2,Q68G31,Q9R168        |
| 2981 | 1,2,25,26,<br>27,28,31,3<br>2 | 3,4,5,6,7,8<br>,29,30  | 7 O70417,P19218,P22273,P49134,Q5RJR2,Q6IG02,Q99041        |
| 2982 | 1,2,25,26,<br>27,29,30,3<br>1 | 3,4,5,6,7,8<br>,28,32  | 6 D3ZUC6,P11598,P22273,P22282,Q63617,Q99041               |
| 2983 | 1,2,25,26,<br>27,29,30,3<br>2 | 3,4,5,6,7,8<br>,28,31  | 6 D3ZUC6,P22273,P82471,Q68G31,Q99041,Q9R168               |
| 2984 | 1,2,25,26,<br>27,29,31,3<br>2 | 3,4,5,6,7,8<br>,28,30  | 6 D3ZUC6,O70417,P19218,P22273,P97840,Q99041               |

|      |                               |                       |                                                                                                                           |
|------|-------------------------------|-----------------------|---------------------------------------------------------------------------------------------------------------------------|
| 2985 | 1,2,25,26,<br>27,30,31,3<br>2 | 3,4,5,6,7,8<br>,28,29 | 9 D3ZUC6,P06760,P06761,P21674,P22273,P47967,P97840,Q63617,Q99041                                                          |
| 2986 | 1,2,25,26,<br>28,29,30,3<br>1 | 3,4,5,6,7,8<br>,27,32 | 7 D3ZUC6,P00714,P22273,P22282,P50115,P50116,Q99041                                                                        |
| 2987 | 1,2,25,26,<br>28,29,30,3<br>2 | 3,4,5,6,7,8<br>,27,31 | 7 D3ZUC6,P22273,P50115,P50116,Q68G31,Q99041,Q9R168                                                                        |
| 2988 | 1,2,25,26,<br>28,29,31,3<br>2 | 3,4,5,6,7,8<br>,27,30 | 6 O70417,P19218,P22273,P50115,P50116,Q99041                                                                               |
| 2989 | 1,2,25,26,<br>28,30,31,3<br>2 | 3,4,5,6,7,8<br>,27,29 | 11 D3ZUC6,P06760,P22273,P22282,P47967,P50115,P50116,Q4G075,Q5I0D1,Q68G31,Q99041                                           |
| 2990 | 1,2,25,26,<br>29,30,31,3<br>2 | 3,4,5,6,7,8<br>,27,28 | 17 D3ZUC6,O70417,P00507,P06761,P11598,P19218,P22273,P22282,P47967,P50115,P50116,P97840,Q4G075,Q5I0D1,Q63617,Q68G31,Q99041 |
| 2991 | 1,2,25,27,<br>28,29,30,3<br>1 | 3,4,5,6,7,8<br>,26,32 | 2 P22273,Q99041                                                                                                           |
| 2992 | 1,2,25,27,<br>28,29,30,3<br>2 | 3,4,5,6,7,8<br>,26,31 | 7 D3ZUC6,P00758,P22273,P49134,Q5RJR2,Q68G31,Q99041                                                                        |
| 2993 | 1,2,25,27,<br>28,29,31,3<br>2 | 3,4,5,6,7,8<br>,26,30 | 5 O70417,P22273,P49134,Q5RJR2,Q99041                                                                                      |
| 2994 | 1,2,25,27,<br>28,30,31,3<br>2 | 3,4,5,6,7,8<br>,26,29 | 6 D3ZUC6,P06760,P22273,P49134,Q99041,Q9QX74                                                                               |
| 2995 | 1,2,25,27,<br>29,30,31,3<br>2 | 3,4,5,6,7,8<br>,26,28 | 7 D3ZUC6,P07150,P22273,P47967,P49134,P97840,Q99041                                                                        |
| 2996 | 1,2,25,28,<br>29,30,31,3<br>2 | 3,4,5,6,7,8<br>,26,27 | 7 D3ZUC6,P22273,P22282,P50115,P50116,Q68G31,Q99041                                                                        |
| 2997 | 1,2,26,27,<br>28,29,30,3<br>1 | 3,4,5,6,7,8<br>,25,32 | 2 O70417,Q99041                                                                                                           |

|      |                               |                                |    |                                                                                                                        |
|------|-------------------------------|--------------------------------|----|------------------------------------------------------------------------------------------------------------------------|
| 2998 | 1,2,26,27,<br>28,29,30,3<br>2 | 3,4,5,6,7,8<br>,25,31          | 4  | P00758,P29315,P50115,Q68G31                                                                                            |
| 2999 | 1,2,26,27,<br>28,29,31,3<br>2 | 3,4,5,6,7,8<br>,25,30          | 3  | O70417,Q63474,Q99041                                                                                                   |
| 3000 | 1,2,26,27,<br>28,30,31,3<br>2 | 3,4,5,6,7,8<br>,25,29          | 4  | P06760,P22273,P49134,P50115                                                                                            |
| 3001 | 1,2,26,27,<br>29,30,31,3<br>2 | 3,4,5,6,7,8<br>,25,28          | 5  | O70417,P22273,P36860,P50115,Q99041                                                                                     |
| 3002 | 1,2,26,28,<br>29,30,31,3<br>2 | 3,4,5,6,7,8<br>,25,27          | 10 | O70417,P01835,P22273,P50115,P50116,Q4G075,Q5QE79,Q63474,Q68G31,Q99041                                                  |
| 3003 | 1,2,27,28,<br>29,30,31,3<br>2 | 3,4,5,6,7,8<br>,25,26          | 6  | O70417,P22273,P49134,P50115,P80299,Q99041                                                                              |
| 3004 | 1,3,4,5,6,7<br>,8,25          | 2,26,27,28<br>,29,30,31,<br>32 | 6  | O70417,P01681,P06911,P49134,Q09030,Q99041                                                                              |
| 3005 | 1,3,4,5,6,7<br>,8,26          | 2,25,27,28<br>,29,30,31,<br>32 | 7  | D3ZUC6,P02783,P22273,P49134,P52590,Q5RJR2,Q99041                                                                       |
| 3006 | 1,3,4,5,6,7<br>,8,27          | 2,25,26,28<br>,29,30,31,<br>32 | 13 | D3ZUC6,O70417,P02783,P11598,P19218,P22273,P22282,P47967,P50115,P50116,P52590,Q5I0D1,Q99041                             |
| 3007 | 1,3,4,5,6,7<br>,8,28          | 2,25,26,27<br>,29,30,31,<br>32 | 17 | D3ZUC6,O70417,P06761,P06911,P11598,P19218,P21674,P22273,P22282,P47967,P49134,P52590,P97840,Q09030,Q63617,Q99041,Q9QW07 |
| 3008 | 1,3,4,5,6,7<br>,8,29          | 2,25,26,27<br>,28,30,31,<br>32 | 13 | D3ZUC6,O70594,P02783,P19218,P21674,P22273,P42854,P47967,P49134,P52590,P97840,Q5RJR2,Q99041                             |
| 3009 | 1,3,4,5,6,7<br>,8,30          | 2,25,26,27<br>,28,29,31,<br>32 | 15 | O70417,P02783,P19218,P49134,P52590,Q09030,Q4FZU2,Q5RJR2,Q6IFU7,Q6IFW6,Q6IG02,Q6IG05,Q6IMF3,Q6P6Q2,Q99041               |
| 3010 | 1,3,4,5,6,7<br>,8,31          | 2,25,26,27<br>,28,29,30,<br>32 | 12 | D3ZUC6,P02783,P06911,P49134,P52590,Q05702,Q09030,Q5RJR2,Q63532,Q68G31,Q99041,Q9QX79                                    |



|      |                       |                                |                                                           |
|------|-----------------------|--------------------------------|-----------------------------------------------------------|
| 3011 | 1,3,4,5,6,7<br>,8,32  | 2,25,26,27<br>,28,29,30,<br>31 | 8 D3ZUC6,P01681,P02783,P19218,P49134,P52590,Q09030,Q99041 |
| 3012 | 1,3,4,5,6,7<br>,25,26 | 2,8,27,28,<br>29,30,31,3<br>2  | 2 P49134,Q63150                                           |
| 3013 | 1,3,4,5,6,7<br>,25,27 | 2,8,26,28,<br>29,30,31,3<br>2  | 2 P50116,Q03191                                           |
| 3014 | 1,3,4,5,6,7<br>,25,28 | 2,8,26,27,<br>29,30,31,3<br>2  | 2 P97840,Q09030                                           |
| 3015 | 1,3,4,5,6,7<br>,25,29 | 2,8,26,27,<br>28,30,31,3<br>2  | 1 Q9QWN8                                                  |
| 3016 | 1,3,4,5,6,7<br>,25,30 | 2,8,26,27,<br>28,29,31,3<br>2  | 4 P25809,Q09030,Q6IFW6,Q9QWN8                             |
| 3017 | 1,3,4,5,6,7<br>,25,31 | 2,8,26,27,<br>28,29,30,3<br>2  | 6 P25809,P29315,Q09030,Q63150,Q68G31,Q9QWN8               |
| 3018 | 1,3,4,5,6,7<br>,25,32 | 2,8,26,27,<br>28,29,30,3<br>1  | 3 P01681,P25809,Q09030                                    |
| 3019 | 1,3,4,5,6,7<br>,26,27 | 2,8,25,28,<br>29,30,31,3<br>2  | 6 P02783,P21588,P47967,P50116,P97840,Q5I0D1               |
| 3020 | 1,3,4,5,6,7<br>,26,28 | 2,8,25,27,<br>29,30,31,3<br>2  | 6 D3ZUC6,P11598,P21588,P47967,P97840,Q5RLM2               |
| 3021 | 1,3,4,5,6,7<br>,26,29 | 2,8,25,27,<br>28,30,31,3<br>2  | 5 P02783,P21588,P47967,P49134,P97840                      |
| 3022 | 1,3,4,5,6,7<br>,26,30 | 2,8,25,27,<br>28,29,31,3<br>2  | 4 P02783,P21588,P49134,P97840                             |
| 3023 | 1,3,4,5,6,7<br>,26,31 | 2,8,25,27,<br>28,29,30,3<br>2  | 6 P02783,P49134,P57113,Q63150,Q68G31,Q9QX79               |

|      |                       |                               |                                                                  |
|------|-----------------------|-------------------------------|------------------------------------------------------------------|
| 3024 | 1,3,4,5,6,7<br>,26,32 | 2,8,25,27,<br>28,29,30,3<br>1 | 1 P02783                                                         |
| 3025 | 1,3,4,5,6,7<br>,27,28 | 2,8,25,26,<br>29,30,31,3<br>2 | 8 D3ZUC6,P11598,P19218,P47967,P50116,P97840,Q5I0D1,Q68G31        |
| 3026 | 1,3,4,5,6,7<br>,27,29 | 2,8,25,26,<br>28,30,31,3<br>2 | 7 D3ZUC6,P02783,P47967,P50116,P97840,Q07523,Q5I0D1               |
| 3027 | 1,3,4,5,6,7<br>,27,30 | 2,8,25,26,<br>28,29,31,3<br>2 | 9 P02783,P19218,P21588,P84039,P97840,Q03191,Q6IFW6,Q6IG02,Q6P6Q2 |
| 3028 | 1,3,4,5,6,7<br>,27,31 | 2,8,25,26,<br>28,29,30,3<br>2 | 4 P02783,P50116,Q03191,Q68G31                                    |
| 3029 | 1,3,4,5,6,7<br>,27,32 | 2,8,25,26,<br>28,29,30,3<br>1 | 4 P02783,P50116,P97840,Q03191                                    |
| 3030 | 1,3,4,5,6,7<br>,28,29 | 2,8,25,26,<br>27,30,31,3<br>2 | 7 D3ZUC6,P11598,P21674,P47967,P52590,P97840,Q63617               |
| 3031 | 1,3,4,5,6,7<br>,28,30 | 2,8,25,26,<br>27,29,31,3<br>2 | 3 P19218,P47967,P97840                                           |
| 3032 | 1,3,4,5,6,7<br>,28,31 | 2,8,25,26,<br>27,29,30,3<br>2 | 3 D3ZUC6,P97840,Q68G31                                           |
| 3033 | 1,3,4,5,6,7<br>,28,32 | 2,8,25,26,<br>27,29,30,3<br>1 | 3 P11598,P47967,P97840                                           |
| 3034 | 1,3,4,5,6,7<br>,29,30 | 2,8,25,26,<br>27,28,31,3<br>2 | 9 P02783,P19218,P49134,P84039,P97840,Q5RJR2,Q6IFW6,Q6IG02,Q9QWN8 |
| 3035 | 1,3,4,5,6,7<br>,29,31 | 2,8,25,26,<br>27,28,30,3<br>2 | 4 P02783,Q5RJR2,Q68G31,Q9QWN8                                    |
| 3036 | 1,3,4,5,6,7<br>,29,32 | 2,8,25,26,<br>27,28,30,3<br>1 | 3 P02783,P26342,P97840                                           |

|      |                       |                               |    |                                                                                     |
|------|-----------------------|-------------------------------|----|-------------------------------------------------------------------------------------|
| 3037 | 1,3,4,5,6,7<br>,30,31 | 2,8,25,26,<br>27,28,29,3<br>2 | 7  | P25809,P26342,Q5RJR2,Q68G31,Q812E4,Q9QWN8,Q9QX79                                    |
| 3038 | 1,3,4,5,6,7<br>,30,32 | 2,8,25,26,<br>27,28,29,3<br>1 | 4  | P19218,P25809,P26342,Q6P6R2                                                         |
| 3039 | 1,3,4,5,6,7<br>,31,32 | 2,8,25,26,<br>27,28,29,3<br>0 | 3  | P25809,P26342,Q9QX79                                                                |
| 3040 | 1,3,4,5,6,8<br>,25,26 | 2,7,27,28,<br>29,30,31,3<br>2 | 5  | P01681,P13432,P49134,P80299,Q06000                                                  |
| 3041 | 1,3,4,5,6,8<br>,25,27 | 2,7,26,28,<br>29,30,31,3<br>2 | 2  | P01681,P01835                                                                       |
| 3042 | 1,3,4,5,6,8<br>,25,28 | 2,7,26,27,<br>29,30,31,3<br>2 | 2  | P01681,Q09030                                                                       |
| 3043 | 1,3,4,5,6,8<br>,25,29 | 2,7,26,27,<br>28,30,31,3<br>2 | 2  | P01681,P49134                                                                       |
| 3044 | 1,3,4,5,6,8<br>,25,30 | 2,7,26,27,<br>28,29,31,3<br>2 | 12 | O70417,O88797,P01681,Q05511,Q09030,Q4FZU2,Q6IFU7,Q6IFW6,Q6IG02,Q6IG05,Q6IMF3,Q6P6Q2 |
| 3045 | 1,3,4,5,6,8<br>,25,31 | 2,7,26,27,<br>28,29,30,3<br>2 | 6  | P01681,P29315,Q05702,Q09030,Q63532,Q9R168                                           |
| 3046 | 1,3,4,5,6,8<br>,25,32 | 2,7,26,27,<br>28,29,30,3<br>1 | 3  | P01681,P13432,Q09030                                                                |
| 3047 | 1,3,4,5,6,8<br>,26,27 | 2,7,25,28,<br>29,30,31,3<br>2 | 4  | P02783,P15399,P97580,Q30KJ2                                                         |
| 3048 | 1,3,4,5,6,8<br>,26,28 | 2,7,25,27,<br>29,30,31,3<br>2 | 2  | D3ZUC6,P49134                                                                       |
| 3049 | 1,3,4,5,6,8<br>,26,29 | 2,7,25,27,<br>28,30,31,3<br>2 | 3  | P02783,P49134,Q5RJR2                                                                |

|      |                       |                               |    |                                                                                                   |
|------|-----------------------|-------------------------------|----|---------------------------------------------------------------------------------------------------|
| 3050 | 1,3,4,5,6,8<br>,26,30 | 2,7,25,27,<br>28,29,31,3<br>2 | 10 | O88797,P02783,P49134,Q4FZU2,Q5RJR2,Q6IFU7,Q6IFW6,Q6IG02,Q6IMF3,Q6P6Q2                             |
| 3051 | 1,3,4,5,6,8<br>,26,31 | 2,7,25,27,<br>28,29,30,3<br>2 | 6  | P02783,P49134,Q05702,Q5RJR2,Q63532,Q9R168                                                         |
| 3052 | 1,3,4,5,6,8<br>,26,32 | 2,7,25,27,<br>28,29,30,3<br>1 | 2  | P01681,P02783                                                                                     |
| 3053 | 1,3,4,5,6,8<br>,27,28 | 2,7,25,26,<br>29,30,31,3<br>2 | 3  | D3ZUC6,P19218,P22282                                                                              |
| 3054 | 1,3,4,5,6,8<br>,27,29 | 2,7,25,26,<br>28,30,31,3<br>2 | 3  | D3ZUC6,P02783,P19218                                                                              |
| 3055 | 1,3,4,5,6,8<br>,27,30 | 2,7,25,26,<br>28,29,31,3<br>2 | 14 | O70417,O88797,P02783,P19218,P97580,Q10758,Q4FZU2,Q6IFU7,Q6IFU8,Q6IFW6,Q6IG02,Q6IG05,Q6IMF3,Q6P6Q2 |
| 3056 | 1,3,4,5,6,8<br>,27,31 | 2,7,25,26,<br>28,29,30,3<br>2 | 4  | P02783,P19218,P23739,Q9R168                                                                       |
| 3057 | 1,3,4,5,6,8<br>,27,32 | 2,7,25,26,<br>28,29,30,3<br>1 | 3  | P01681,P02783,P19218                                                                              |
| 3058 | 1,3,4,5,6,8<br>,28,29 | 2,7,25,26,<br>27,30,31,3<br>2 | 2  | D3ZUC6,P21674                                                                                     |
| 3059 | 1,3,4,5,6,8<br>,28,30 | 2,7,25,26,<br>27,29,31,3<br>2 | 8  | O88797,P19218,Q4FZU2,Q6IFU7,Q6IFW6,Q6IG02,Q6IMF3,Q6P6Q2                                           |
| 3060 | 1,3,4,5,6,8<br>,28,31 | 2,7,25,26,<br>27,29,30,3<br>2 | 4  | D3ZUC6,Q09030,Q63532,Q9R168                                                                       |
| 3061 | 1,3,4,5,6,8<br>,28,32 | 2,7,25,26,<br>27,29,30,3<br>1 | 1  | P01681                                                                                            |
| 3062 | 1,3,4,5,6,8<br>,29,30 | 2,7,25,26,<br>27,28,31,3<br>2 | 11 | O88797,P02783,P19218,P49134,Q4FZU2,Q5RJR2,Q6IFU7,Q6IFW6,Q6IG02,Q6IMF3,Q6P6Q2                      |

|      |                        |                               |    |                                                                                                   |
|------|------------------------|-------------------------------|----|---------------------------------------------------------------------------------------------------|
| 3063 | 1,3,4,5,6,8<br>,29,31  | 2,7,25,26,<br>27,28,30,3<br>2 | 5  | P02783,P49134,Q05702,Q5RJR2,Q9R168                                                                |
| 3064 | 1,3,4,5,6,8<br>,29,32  | 2,7,25,26,<br>27,28,30,3<br>1 | 2  | P01681,P02783                                                                                     |
| 3065 | 1,3,4,5,6,8<br>,30,31  | 2,7,25,26,<br>27,28,29,3<br>2 | 14 | O88797,P19218,P49134,Q05702,Q09030,Q4FZU2,Q5RJR2,Q63532,Q6IFU7,Q6IFW6,Q6IG02,Q6IG05,Q6IMF3,Q6P6Q2 |
| 3066 | 1,3,4,5,6,8<br>,30,32  | 2,7,25,26,<br>27,28,29,3<br>1 | 10 | O88797,P01681,P19218,P20646,Q4FZU2,Q6IFU7,Q6IFW6,Q6IG02,Q6IMF3,Q6P6Q2                             |
| 3067 | 1,3,4,5,6,8<br>,31,32  | 2,7,25,26,<br>27,28,29,3<br>0 | 4  | P01681,Q05702,Q09030,Q63532                                                                       |
| 3068 | 1,3,4,5,6,2<br>5,26,27 | 2,7,8,28,2<br>9,30,31,32      | 2  | P21588,Q06000                                                                                     |
| 3069 | 1,3,4,5,6,2<br>5,26,28 | 2,7,8,27,2<br>9,30,31,32      | 1  | Q06000                                                                                            |
| 3070 | 1,3,4,5,6,2<br>5,26,29 | 2,7,8,27,2<br>8,30,31,32      | 0  |                                                                                                   |
| 3071 | 1,3,4,5,6,2<br>5,26,30 | 2,7,8,27,2<br>8,29,31,32      | 5  | P21588,P25809,P47727,Q06000,Q812E4                                                                |
| 3072 | 1,3,4,5,6,2<br>5,26,31 | 2,7,8,27,2<br>8,29,30,32      | 5  | P25809,P29315,P62804,Q63150,Q812E4                                                                |
| 3073 | 1,3,4,5,6,2<br>5,26,32 | 2,7,8,27,2<br>8,29,30,31      | 4  | P01681,P25809,P62804,Q06000                                                                       |
| 3074 | 1,3,4,5,6,2<br>5,27,28 | 2,7,8,26,2<br>9,30,31,32      | 0  |                                                                                                   |
| 3075 | 1,3,4,5,6,2<br>5,27,29 | 2,7,8,26,2<br>8,30,31,32      | 0  |                                                                                                   |
| 3076 | 1,3,4,5,6,2<br>5,27,30 | 2,7,8,26,2<br>8,29,31,32      | 3  | Q6IFW6,Q6IG02,Q6P6Q2                                                                              |
| 3077 | 1,3,4,5,6,2<br>5,27,31 | 2,7,8,26,2<br>8,29,30,32      | 2  | P29315,P62804                                                                                     |
| 3078 | 1,3,4,5,6,2<br>5,27,32 | 2,7,8,26,2<br>8,29,30,31      | 3  | P01681,P62804,Q03191                                                                              |
| 3079 | 1,3,4,5,6,2<br>5,28,29 | 2,7,8,26,2<br>7,30,31,32      | 0  |                                                                                                   |
| 3080 | 1,3,4,5,6,2<br>5,28,30 | 2,7,8,26,2<br>7,29,31,32      | 2  | P25809,Q62975                                                                                     |

|      |                        |                          |    |                                                                                     |
|------|------------------------|--------------------------|----|-------------------------------------------------------------------------------------|
| 3081 | 1,3,4,5,6,2<br>5,28,31 | 2,7,8,26,2<br>7,29,30,32 | 3  | P25809,P29315,Q09030                                                                |
| 3082 | 1,3,4,5,6,2<br>5,28,32 | 2,7,8,26,2<br>7,29,30,31 | 4  | P01681,P25809,P62804,Q62975                                                         |
| 3083 | 1,3,4,5,6,2<br>5,29,30 | 2,7,8,26,2<br>7,28,31,32 | 4  | P25809,Q6IFW6,Q6IG02,Q9QWN8                                                         |
| 3084 | 1,3,4,5,6,2<br>5,29,31 | 2,7,8,26,2<br>7,28,30,32 | 3  | P25809,P29315,Q9QWN8                                                                |
| 3085 | 1,3,4,5,6,2<br>5,29,32 | 2,7,8,26,2<br>7,28,30,31 | 2  | P01681,Q9WTT6                                                                       |
| 3086 | 1,3,4,5,6,2<br>5,30,31 | 2,7,8,26,2<br>7,28,29,32 | 12 | P25809,P29315,P47727,P62804,P97584,Q09030,Q6AYR9,Q6IG02,Q6P6R2,Q812E4,Q9QWN8,Q9WTT6 |
| 3087 | 1,3,4,5,6,2<br>5,30,32 | 2,7,8,26,2<br>7,28,29,31 | 8  | P01681,P25809,P62804,P97584,Q00715,Q6P6R2,Q9QX74,Q9WTT6                             |
| 3088 | 1,3,4,5,6,2<br>5,31,32 | 2,7,8,26,2<br>7,28,29,30 | 9  | P01681,P25809,P29315,P62804,P97584,Q09030,Q4G075,Q6P6R2,Q9WTT6                      |
| 3089 | 1,3,4,5,6,2<br>6,27,28 | 2,7,8,25,2<br>9,30,31,32 | 2  | P21588,P97840                                                                       |
| 3090 | 1,3,4,5,6,2<br>6,27,29 | 2,7,8,25,2<br>8,30,31,32 | 3  | P02783,P09656,P21588                                                                |
| 3091 | 1,3,4,5,6,2<br>6,27,30 | 2,7,8,25,2<br>8,29,31,32 | 3  | P02783,P21588,Q6IG02                                                                |
| 3092 | 1,3,4,5,6,2<br>6,27,31 | 2,7,8,25,2<br>8,29,30,32 | 2  | P02783,P62804                                                                       |
| 3093 | 1,3,4,5,6,2<br>6,27,32 | 2,7,8,25,2<br>8,29,30,31 | 2  | P02783,P62804                                                                       |
| 3094 | 1,3,4,5,6,2<br>6,28,29 | 2,7,8,25,2<br>7,30,31,32 | 3  | P21588,P47967,P97840                                                                |
| 3095 | 1,3,4,5,6,2<br>6,28,30 | 2,7,8,25,2<br>7,29,31,32 | 1  | P21588                                                                              |
| 3096 | 1,3,4,5,6,2<br>6,28,31 | 2,7,8,25,2<br>7,29,30,32 | 1  | P62804                                                                              |
| 3097 | 1,3,4,5,6,2<br>6,28,32 | 2,7,8,25,2<br>7,29,30,31 | 1  | P62804                                                                              |
| 3098 | 1,3,4,5,6,2<br>6,29,30 | 2,7,8,25,2<br>7,28,31,32 | 4  | P02783,P21588,Q5RJR2,Q6IG02                                                         |
| 3099 | 1,3,4,5,6,2<br>6,29,31 | 2,7,8,25,2<br>7,28,30,32 | 1  | P02783                                                                              |
| 3100 | 1,3,4,5,6,2<br>6,29,32 | 2,7,8,25,2<br>7,28,30,31 | 1  | P02783                                                                              |

|      |                        |                          |                                                           |
|------|------------------------|--------------------------|-----------------------------------------------------------|
| 3101 | 1,3,4,5,6,2<br>6,30,31 | 2,7,8,25,2<br>7,28,29,32 | 7 P25809,P47727,P62804,Q4G075,Q5RJR2,Q6AYR9,Q812E4        |
| 3102 | 1,3,4,5,6,2<br>6,30,32 | 2,7,8,25,2<br>7,28,29,31 | 6 P25809,P62804,Q00715,Q4G075,Q8VD89,Q9WTT6               |
| 3103 | 1,3,4,5,6,2<br>6,31,32 | 2,7,8,25,2<br>7,28,29,30 | 3 P25809,P62804,Q4G075                                    |
| 3104 | 1,3,4,5,6,2<br>7,28,29 | 2,7,8,25,2<br>6,30,31,32 | 4 D3ZUC6,P09656,P47967,P97840                             |
| 3105 | 1,3,4,5,6,2<br>7,28,30 | 2,7,8,25,2<br>6,29,31,32 | 5 P19218,P21588,P97840,Q6IG02,Q8VD89                      |
| 3106 | 1,3,4,5,6,2<br>7,28,31 | 2,7,8,25,2<br>6,29,30,32 | 1 Q68G31                                                  |
| 3107 | 1,3,4,5,6,2<br>7,28,32 | 2,7,8,25,2<br>6,29,30,31 | 1 Q62761;Q62762;Q62763                                    |
| 3108 | 1,3,4,5,6,2<br>7,29,30 | 2,7,8,25,2<br>6,28,31,32 | 7 P02783,P19218,P21588,P84039,Q6IFW6,Q6IG02,Q6P6Q2        |
| 3109 | 1,3,4,5,6,2<br>7,29,31 | 2,7,8,25,2<br>6,28,30,32 | 1 P02783                                                  |
| 3110 | 1,3,4,5,6,2<br>7,29,32 | 2,7,8,25,2<br>6,28,30,31 | 1 P02783                                                  |
| 3111 | 1,3,4,5,6,2<br>7,30,31 | 2,7,8,25,2<br>6,28,29,32 | 4 P19218,P30120,Q6IG02,Q9WTT6                             |
| 3112 | 1,3,4,5,6,2<br>7,30,32 | 2,7,8,25,2<br>6,28,29,31 | 6 P19218,Q6IG02,Q6P6R2,Q8VD89,Q9QX74,Q9WTT6               |
| 3113 | 1,3,4,5,6,2<br>7,31,32 | 2,7,8,25,2<br>6,28,29,30 | 2 P62804,Q9WTT6                                           |
| 3114 | 1,3,4,5,6,2<br>8,29,30 | 2,7,8,25,2<br>6,27,31,32 | 2 P97840,Q6IG02                                           |
| 3115 | 1,3,4,5,6,2<br>8,29,31 | 2,7,8,25,2<br>6,27,30,32 | 0                                                         |
| 3116 | 1,3,4,5,6,2<br>8,29,32 | 2,7,8,25,2<br>6,27,30,31 | 1 P97840                                                  |
| 3117 | 1,3,4,5,6,2<br>8,30,31 | 2,7,8,25,2<br>6,27,29,32 | 2 P25809,Q9WTT6                                           |
| 3118 | 1,3,4,5,6,2<br>8,30,32 | 2,7,8,25,2<br>6,27,29,31 | 5 P25809,Q4G075,Q8VD89,Q9QX74,Q9WTT6                      |
| 3119 | 1,3,4,5,6,2<br>8,31,32 | 2,7,8,25,2<br>6,27,29,30 | 5 P22006,P25809,P62804,Q4G075,Q9WTT6                      |
| 3120 | 1,3,4,5,6,2<br>9,30,31 | 2,7,8,25,2<br>6,27,28,32 | 8 P02783,P07150,P25809,P36860,Q5RJR2,Q6IG02,Q9QWN8,Q9WTT6 |

|      |                        |                               |    |                                                                                                       |
|------|------------------------|-------------------------------|----|-------------------------------------------------------------------------------------------------------|
| 3121 | 1,3,4,5,6,2<br>9,30,32 | 2,7,8,25,2<br>6,27,28,31      | 7  | P02783,P25809,P26342,Q63598,Q6IG02,Q9WTT6,Q9Z0V6                                                      |
| 3122 | 1,3,4,5,6,2<br>9,31,32 | 2,7,8,25,2<br>6,27,28,30      | 3  | P25809,P62804,Q9WTT6                                                                                  |
| 3123 | 1,3,4,5,6,3<br>0,31,32 | 2,7,8,25,2<br>6,27,28,29      | 14 | P20646,P25809,P26342,P36860,P47727,P62804,P97584,Q00715,Q4G075,Q6P6R2,Q812E4,Q8V<br>D89,Q9QX74,Q9WTT6 |
| 3124 | 1,3,4,5,7,8<br>,25,26  | 2,6,27,28,<br>29,30,31,3<br>2 | 3  | P01681,P22006,P49134                                                                                  |
| 3125 | 1,3,4,5,7,8<br>,25,27  | 2,6,26,28,<br>29,30,31,3<br>2 | 5  | O70417,P01681,P01835,Q4G075,Q68G31                                                                    |
| 3126 | 1,3,4,5,7,8<br>,25,28  | 2,6,26,27,<br>29,30,31,3<br>2 | 6  | O70417,P01681,P36860,P49134,P97840,Q811M5                                                             |
| 3127 | 1,3,4,5,7,8<br>,25,29  | 2,6,26,27,<br>28,30,31,3<br>2 | 5  | P01681,P06760,P22006,P48032,P49134                                                                    |
| 3128 | 1,3,4,5,7,8<br>,25,30  | 2,6,26,27,<br>28,29,31,3<br>2 | 13 | O70417,O88797,P01681,P49134,Q05511,Q4FZU2,Q6IFU7,Q6IFU8,Q6IFW6,Q6IG02,Q6IG05,Q6I<br>MF3,Q6P6Q2        |
| 3129 | 1,3,4,5,7,8<br>,25,31  | 2,6,26,27,<br>28,29,30,3<br>2 | 5  | P01681,P29315,P49134,Q68G31,Q811M5                                                                    |
| 3130 | 1,3,4,5,7,8<br>,25,32  | 2,6,26,27,<br>28,29,30,3<br>1 | 2  | P01681,Q811M5                                                                                         |
| 3131 | 1,3,4,5,7,8<br>,26,27  | 2,6,25,28,<br>29,30,31,3<br>2 | 5  | D3ZUC6,P47967,P97840,Q5I0D1,Q68G31                                                                    |
| 3132 | 1,3,4,5,7,8<br>,26,28  | 2,6,25,27,<br>29,30,31,3<br>2 | 5  | D3ZUC6,P47967,P49134,P97840,Q5RLM2                                                                    |
| 3133 | 1,3,4,5,7,8<br>,26,29  | 2,6,25,27,<br>28,30,31,3<br>2 | 7  | D3ZUC6,P06760,P22006,P47967,P49134,P97840,Q9QX74                                                      |
| 3134 | 1,3,4,5,7,8<br>,26,30  | 2,6,25,27,<br>28,29,31,3<br>2 | 10 | O70417,P49134,P97840,Q4FZU2,Q5RJR2,Q6IFU7,Q6IFW6,Q6IG02,Q6IMF3,Q6P6Q2                                 |



|      |                       |                               |                                                                                               |
|------|-----------------------|-------------------------------|-----------------------------------------------------------------------------------------------|
| 3135 | 1,3,4,5,7,8<br>,26,31 | 2,6,25,27,<br>28,29,30,3<br>2 | 4 D3ZUC6,P49134,Q5RLM2,Q68G31                                                                 |
| 3136 | 1,3,4,5,7,8<br>,26,32 | 2,6,25,27,<br>28,29,30,3<br>1 | 3 P01681,P49134,P97840                                                                        |
| 3137 | 1,3,4,5,7,8<br>,27,28 | 2,6,25,26,<br>29,30,31,3<br>2 | 8 D3ZUC6,P19218,P22282,P47967,P97840,Q4G075,Q5I0D1,Q68G31                                     |
| 3138 | 1,3,4,5,7,8<br>,27,29 | 2,6,25,26,<br>28,30,31,3<br>2 | 7 D3ZUC6,P06760,P47967,P97840,Q4G075,Q5I0D1,Q68G31                                            |
| 3139 | 1,3,4,5,7,8<br>,27,30 | 2,6,25,26,<br>28,29,31,3<br>2 | 12 O70417,P19218,P97840,Q10758,Q4FZU2,Q6IFU7,Q6IFU8,Q6IFW6,Q6IG02,Q6IG05,Q6IMF3,Q6P6Q2        |
| 3140 | 1,3,4,5,7,8<br>,27,31 | 2,6,25,26,<br>28,29,30,3<br>2 | 3 D3ZUC6,P23739,Q68G31                                                                        |
| 3141 | 1,3,4,5,7,8<br>,27,32 | 2,6,25,26,<br>28,29,30,3<br>1 | 3 P01681,P97840,Q03191                                                                        |
| 3142 | 1,3,4,5,7,8<br>,28,29 | 2,6,25,26,<br>27,30,31,3<br>2 | 7 D3ZUC6,P06760,P21674,P47967,P49134,P97840,Q63493                                            |
| 3143 | 1,3,4,5,7,8<br>,28,30 | 2,6,25,26,<br>27,29,31,3<br>2 | 12 D3ZUC6,O70417,P19218,P47967,P49134,P97840,Q4FZU2,Q6IFU7,Q6IFW6,Q6IG02,Q6IMF3,Q6P6Q2        |
| 3144 | 1,3,4,5,7,8<br>,28,31 | 2,6,25,26,<br>27,29,30,3<br>2 | 5 D3ZUC6,P49134,P97840,Q68G31,Q811M5                                                          |
| 3145 | 1,3,4,5,7,8<br>,28,32 | 2,6,25,26,<br>27,29,30,3<br>1 | 5 D3ZUC6,P01681,P47967,P97840,Q811M5                                                          |
| 3146 | 1,3,4,5,7,8<br>,29,30 | 2,6,25,26,<br>27,28,31,3<br>2 | 13 O88797,P19218,P47967,P49134,P97840,Q4FZU2,Q5RJR2,Q6IFU7,Q6IFU8,Q6IFW6,Q6IG02,Q6IMF3,Q6P6Q2 |
| 3147 | 1,3,4,5,7,8<br>,29,31 | 2,6,25,26,<br>27,28,30,3<br>2 | 5 D3ZUC6,P49134,P82471,Q5RJR2,Q68G31                                                          |

|      |                        |                               |                                                                                 |
|------|------------------------|-------------------------------|---------------------------------------------------------------------------------|
| 3148 | 1,3,4,5,7,8<br>,29,32  | 2,6,25,26,<br>27,28,30,3<br>1 | 4 P01681,P47967,P49134,P97840                                                   |
| 3149 | 1,3,4,5,7,8<br>,30,31  | 2,6,25,26,<br>27,28,29,3<br>2 | 10 P49134,Q4FZU2,Q5RJR2,Q68G31,Q6IFU7,Q6IFW6,Q6IG02,Q6IG05,Q6IMF3,Q6P6Q2        |
| 3150 | 1,3,4,5,7,8<br>,30,32  | 2,6,25,26,<br>27,28,29,3<br>1 | 11 O70417,O88797,P01681,P19218,P35280,Q4FZU2,Q6IFU7,Q6IFW6,Q6IG02,Q6IMF3,Q6P6Q2 |
| 3151 | 1,3,4,5,7,8<br>,31,32  | 2,6,25,26,<br>27,28,29,3<br>0 | 3 P01681,P82471,Q811M5                                                          |
| 3152 | 1,3,4,5,7,2<br>5,26,27 | 2,6,8,28,2<br>9,30,31,32      | 1 Q68G31                                                                        |
| 3153 | 1,3,4,5,7,2<br>5,26,28 | 2,6,8,27,2<br>9,30,31,32      | 1 P97840                                                                        |
| 3154 | 1,3,4,5,7,2<br>5,26,29 | 2,6,8,27,2<br>8,30,31,32      | 3 O89117,P22006,P97840                                                          |
| 3155 | 1,3,4,5,7,2<br>5,26,30 | 2,6,8,27,2<br>8,29,31,32      | 2 Q05511,Q6IFW6                                                                 |
| 3156 | 1,3,4,5,7,2<br>5,26,31 | 2,6,8,27,2<br>8,29,30,32      | 3 P25809,P29315,Q68G31                                                          |
| 3157 | 1,3,4,5,7,2<br>5,26,32 | 2,6,8,27,2<br>8,29,30,31      | 1 P01681                                                                        |
| 3158 | 1,3,4,5,7,2<br>5,27,28 | 2,6,8,26,2<br>9,30,31,32      | 2 P97840,Q68G31                                                                 |
| 3159 | 1,3,4,5,7,2<br>5,27,29 | 2,6,8,26,2<br>8,30,31,32      | 4 O89117,P22006,P97840,Q68G31                                                   |
| 3160 | 1,3,4,5,7,2<br>5,27,30 | 2,6,8,26,2<br>8,29,31,32      | 6 Q03191,Q05511,Q4FZU2,Q6IFW6,Q6IG02,Q6P6Q2                                     |
| 3161 | 1,3,4,5,7,2<br>5,27,31 | 2,6,8,26,2<br>8,29,30,32      | 4 P23739,P29315,Q03191,Q68G31                                                   |
| 3162 | 1,3,4,5,7,2<br>5,27,32 | 2,6,8,26,2<br>8,29,30,31      | 2 P01681,Q03191                                                                 |
| 3163 | 1,3,4,5,7,2<br>5,28,29 | 2,6,8,26,2<br>7,30,31,32      | 3 O89117,P47967,P97840                                                          |
| 3164 | 1,3,4,5,7,2<br>5,28,30 | 2,6,8,26,2<br>7,29,31,32      | 2 P97840,Q62975                                                                 |
| 3165 | 1,3,4,5,7,2<br>5,28,31 | 2,6,8,26,2<br>7,29,30,32      | 3 P29315,Q68G31,Q811M5                                                          |

|      |                        |                          |   |                                                                |
|------|------------------------|--------------------------|---|----------------------------------------------------------------|
| 3166 | 1,3,4,5,7,2<br>5,28,32 | 2,6,8,26,2<br>7,29,30,31 | 4 | P01681,P97840,Q62975,Q811M5                                    |
| 3167 | 1,3,4,5,7,2<br>5,29,30 | 2,6,8,26,2<br>7,28,31,32 | 7 | P22006,P97840,Q4FZU2,Q6IFW6,Q6IG02,Q6P6Q2,Q9QWN8               |
| 3168 | 1,3,4,5,7,2<br>5,29,31 | 2,6,8,26,2<br>7,28,30,32 | 2 | Q68G31,Q9QWN8                                                  |
| 3169 | 1,3,4,5,7,2<br>5,29,32 | 2,6,8,26,2<br>7,28,30,31 | 1 | P01681                                                         |
| 3170 | 1,3,4,5,7,2<br>5,30,31 | 2,6,8,26,2<br>7,28,29,32 | 9 | P25809,Q4FZU2,Q68G31,Q6AYR9,Q6IFW6,Q6IG02,Q812E4,Q8CFN2,Q9QWN8 |
| 3171 | 1,3,4,5,7,2<br>5,30,32 | 2,6,8,26,2<br>7,28,29,31 | 6 | P01681,P25809,Q4FZU2,Q62975,Q6IFW6,Q6P6R2                      |
| 3172 | 1,3,4,5,7,2<br>5,31,32 | 2,6,8,26,2<br>7,28,29,30 | 3 | P01681,P25809,Q811M5                                           |
| 3173 | 1,3,4,5,7,2<br>6,27,28 | 2,6,8,25,2<br>9,30,31,32 | 7 | D3ZUC6,P21588,P47967,P97840,Q5I0D1,Q5RLM2,Q68G31               |
| 3174 | 1,3,4,5,7,2<br>6,27,29 | 2,6,8,25,2<br>8,30,31,32 | 5 | P21588,P47967,P97840,Q5I0D1,Q68G31                             |
| 3175 | 1,3,4,5,7,2<br>6,27,30 | 2,6,8,25,2<br>8,29,31,32 | 5 | P21588,P97840,Q6IFW6,Q6IG02,Q6P6Q2                             |
| 3176 | 1,3,4,5,7,2<br>6,27,31 | 2,6,8,25,2<br>8,29,30,32 | 2 | P97840,Q68G31                                                  |
| 3177 | 1,3,4,5,7,2<br>6,27,32 | 2,6,8,25,2<br>8,29,30,31 | 2 | P97840,Q03191                                                  |
| 3178 | 1,3,4,5,7,2<br>6,28,29 | 2,6,8,25,2<br>7,30,31,32 | 4 | D3ZUC6,P47967,P97840,Q68G31                                    |
| 3179 | 1,3,4,5,7,2<br>6,28,30 | 2,6,8,25,2<br>7,29,31,32 | 2 | P47967,P97840                                                  |
| 3180 | 1,3,4,5,7,2<br>6,28,31 | 2,6,8,25,2<br>7,29,30,32 | 3 | P97840,Q5RLM2,Q68G31                                           |
| 3181 | 1,3,4,5,7,2<br>6,28,32 | 2,6,8,25,2<br>7,29,30,31 | 2 | P47967,P97840                                                  |
| 3182 | 1,3,4,5,7,2<br>6,29,30 | 2,6,8,25,2<br>7,28,31,32 | 3 | P47967,P97840,Q6IG02                                           |
| 3183 | 1,3,4,5,7,2<br>6,29,31 | 2,6,8,25,2<br>7,28,30,32 | 2 | P97840,Q68G31                                                  |
| 3184 | 1,3,4,5,7,2<br>6,29,32 | 2,6,8,25,2<br>7,28,30,31 | 2 | P47967,P97840                                                  |
| 3185 | 1,3,4,5,7,2<br>6,30,31 | 2,6,8,25,2<br>7,28,29,32 | 5 | P25809,P47727,Q68G31,Q6AYR9,Q812E4                             |

|      |                        |                          |                                                                          |
|------|------------------------|--------------------------|--------------------------------------------------------------------------|
| 3186 | 1,3,4,5,7,2<br>6,30,32 | 2,6,8,25,2<br>7,28,29,31 | 1 P97840                                                                 |
| 3187 | 1,3,4,5,7,2<br>6,31,32 | 2,6,8,25,2<br>7,28,29,30 | 1 Q68G31                                                                 |
| 3188 | 1,3,4,5,7,2<br>7,28,29 | 2,6,8,25,2<br>6,30,31,32 | 6 D3ZUC6,P00507,P47967,P97840,Q5I0D1,Q68G31                              |
| 3189 | 1,3,4,5,7,2<br>7,28,30 | 2,6,8,25,2<br>6,29,31,32 | 5 P19218,P47967,P97840,Q6IG02,Q6P6Q2                                     |
| 3190 | 1,3,4,5,7,2<br>7,28,31 | 2,6,8,25,2<br>6,29,30,32 | 4 D3ZUC6,P47967,P97840,Q68G31                                            |
| 3191 | 1,3,4,5,7,2<br>7,28,32 | 2,6,8,25,2<br>6,29,30,31 | 3 P47967,P97840,Q62761;Q62762;Q62763                                     |
| 3192 | 1,3,4,5,7,2<br>7,29,30 | 2,6,8,25,2<br>6,28,31,32 | 10 P08649,P19218,P47967,P84039,P97840,Q4FZU2,Q6IFW6,Q6IG02,Q6IMF3,Q6P6Q2 |
| 3193 | 1,3,4,5,7,2<br>7,29,31 | 2,6,8,25,2<br>6,28,30,32 | 3 P08649,P97840,Q68G31                                                   |
| 3194 | 1,3,4,5,7,2<br>7,29,32 | 2,6,8,25,2<br>6,28,30,31 | 2 P47967,P97840                                                          |
| 3195 | 1,3,4,5,7,2<br>7,30,31 | 2,6,8,25,2<br>6,28,29,32 | 6 P08649,Q4FZU2,Q68G31,Q6IFW6,Q6IG02,Q6P6Q2                              |
| 3196 | 1,3,4,5,7,2<br>7,30,32 | 2,6,8,25,2<br>6,28,29,31 | 7 P08649,P97840,Q03191,Q4FZU2,Q6IFW6,Q6IG02,Q6P6Q2                       |
| 3197 | 1,3,4,5,7,2<br>7,31,32 | 2,6,8,25,2<br>6,28,29,30 | 4 P08649,P23739,Q03191,Q68G31                                            |
| 3198 | 1,3,4,5,7,2<br>8,29,30 | 2,6,8,25,2<br>6,27,31,32 | 3 P47967,P97840,Q6IG02                                                   |
| 3199 | 1,3,4,5,7,2<br>8,29,31 | 2,6,8,25,2<br>6,27,30,32 | 4 D3ZUC6,P47967,P97840,Q68G31                                            |
| 3200 | 1,3,4,5,7,2<br>8,29,32 | 2,6,8,25,2<br>6,27,30,31 | 3 P47967,P54921,P97840                                                   |
| 3201 | 1,3,4,5,7,2<br>8,30,31 | 2,6,8,25,2<br>6,27,29,32 | 3 P25809,P97840,Q68G31                                                   |
| 3202 | 1,3,4,5,7,2<br>8,30,32 | 2,6,8,25,2<br>6,27,29,31 | 2 P47967,P97840                                                          |
| 3203 | 1,3,4,5,7,2<br>8,31,32 | 2,6,8,25,2<br>6,27,29,30 | 3 P97840,Q68G31,Q811M5                                                   |
| 3204 | 1,3,4,5,7,2<br>9,30,31 | 2,6,8,25,2<br>6,27,28,32 | 8 P08649,P97840,Q4FZU2,Q68G31,Q6IFW6,Q6IG02,Q6P6Q2,Q9QWN8                |
| 3205 | 1,3,4,5,7,2<br>9,30,32 | 2,6,8,25,2<br>6,27,28,31 | 7 P08649,P26342,P97840,Q4FZU2,Q6IFW6,Q6IG02,Q6P6Q2                       |

|      |                        |                          |    |                                                                                            |
|------|------------------------|--------------------------|----|--------------------------------------------------------------------------------------------|
| 3206 | 1,3,4,5,7,2<br>9,31,32 | 2,6,8,25,2<br>6,27,28,30 | 3  | P08649,P26342,Q68G31                                                                       |
| 3207 | 1,3,4,5,7,3<br>0,31,32 | 2,6,8,25,2<br>6,27,28,29 | 5  | P08649,P25809,P26342,Q4FZU2,Q6P6R2                                                         |
| 3208 | 1,3,4,5,8,2<br>5,26,27 | 2,6,7,28,2<br>9,30,31,32 | 3  | P01681,P01835,P80299                                                                       |
| 3209 | 1,3,4,5,8,2<br>5,26,28 | 2,6,7,27,2<br>9,30,31,32 | 3  | P01681,P01835,P80299                                                                       |
| 3210 | 1,3,4,5,8,2<br>5,26,29 | 2,6,7,27,2<br>8,30,31,32 | 4  | P01681,P22006,P49134,P80299                                                                |
| 3211 | 1,3,4,5,8,2<br>5,26,30 | 2,6,7,27,2<br>8,29,31,32 | 11 | O88797,P01681,P01835,P80299,Q05511,Q4FZU2,Q6IFU7,Q6IFW6,Q6IG02,Q6IMF3,Q6P6Q2               |
| 3212 | 1,3,4,5,8,2<br>5,26,31 | 2,6,7,27,2<br>8,29,30,32 | 3  | P01681,P01835,P29315                                                                       |
| 3213 | 1,3,4,5,8,2<br>5,26,32 | 2,6,7,27,2<br>8,29,30,31 | 2  | P01681,P01835                                                                              |
| 3214 | 1,3,4,5,8,2<br>5,27,28 | 2,6,7,26,2<br>9,30,31,32 | 3  | P01681,P01835,P36860                                                                       |
| 3215 | 1,3,4,5,8,2<br>5,27,29 | 2,6,7,26,2<br>8,30,31,32 | 4  | O89117,P01681,P01835,P22006                                                                |
| 3216 | 1,3,4,5,8,2<br>5,27,30 | 2,6,7,26,2<br>8,29,31,32 | 13 | O70417,O88797,P01681,P01835,Q05511,Q4FZU2,Q6IFU7,Q6IFU8,Q6IFW6,Q6IG02,Q6IG05,Q6IMF3,Q6P6Q2 |
| 3217 | 1,3,4,5,8,2<br>5,27,31 | 2,6,7,26,2<br>8,29,30,32 | 6  | P01681,P01835,P23739,P29315,Q68G31,Q9R168                                                  |
| 3218 | 1,3,4,5,8,2<br>5,27,32 | 2,6,7,26,2<br>8,29,30,31 | 3  | P00762,P01681,P01835                                                                       |
| 3219 | 1,3,4,5,8,2<br>5,28,29 | 2,6,7,26,2<br>7,30,31,32 | 1  | P01681                                                                                     |
| 3220 | 1,3,4,5,8,2<br>5,28,30 | 2,6,7,26,2<br>7,29,31,32 | 10 | O88797,P01681,P01835,P80299,Q4FZU2,Q6IFU7,Q6IFW6,Q6IG02,Q6IMF3,Q6P6Q2                      |
| 3221 | 1,3,4,5,8,2<br>5,28,31 | 2,6,7,26,2<br>7,29,30,32 | 5  | P01681,P01835,P29315,P36376,Q811M5                                                         |
| 3222 | 1,3,4,5,8,2<br>5,28,32 | 2,6,7,26,2<br>7,29,30,31 | 3  | P01681,P01835,Q811M5                                                                       |
| 3223 | 1,3,4,5,8,2<br>5,29,30 | 2,6,7,26,2<br>7,28,31,32 | 10 | O88797,P01681,P22006,Q4FZU2,Q6IFU7,Q6IFU8,Q6IFW6,Q6IG02,Q6IMF3,Q6P6Q2                      |
| 3224 | 1,3,4,5,8,2<br>5,29,31 | 2,6,7,26,2<br>7,28,30,32 | 3  | P01681,P29315,Q9R168                                                                       |
| 3225 | 1,3,4,5,8,2<br>5,29,32 | 2,6,7,26,2<br>7,28,30,31 | 1  | P01681                                                                                     |

|      |                        |                          |    |                                                                                     |
|------|------------------------|--------------------------|----|-------------------------------------------------------------------------------------|
| 3226 | 1,3,4,5,8,2<br>5,30,31 | 2,6,7,26,2<br>7,28,29,32 | 12 | O88797,P01681,P01835,P29315,Q05511,Q4FZU2,Q6IFU7,Q6IFW6,Q6IG02,Q6IG05,Q6IMF3,Q6P6Q2 |
| 3227 | 1,3,4,5,8,2<br>5,30,32 | 2,6,7,26,2<br>7,28,29,31 | 10 | O88797,P01681,P01835,Q05511,Q4FZU2,Q6IFU7,Q6IFW6,Q6IG02,Q6IMF3,Q6P6Q2               |
| 3228 | 1,3,4,5,8,2<br>5,31,32 | 2,6,7,26,2<br>7,28,29,30 | 5  | P01681,P01835,P29315,Q80WL1,Q811M5                                                  |
| 3229 | 1,3,4,5,8,2<br>6,27,28 | 2,6,7,25,2<br>9,30,31,32 | 4  | D3ZUC6,P01835,P47967,P97840                                                         |
| 3230 | 1,3,4,5,8,2<br>6,27,29 | 2,6,7,25,2<br>8,30,31,32 | 0  |                                                                                     |
| 3231 | 1,3,4,5,8,2<br>6,27,30 | 2,6,7,25,2<br>8,29,31,32 | 9  | O88797,Q4FZU2,Q6IFU7,Q6IFU8,Q6IFW6,Q6IG02,Q6IG05,Q6IMF3,Q6P6Q2                      |
| 3232 | 1,3,4,5,8,2<br>6,27,31 | 2,6,7,25,2<br>8,29,30,32 | 4  | P01835,P23739,Q68G31,Q9R168                                                         |
| 3233 | 1,3,4,5,8,2<br>6,27,32 | 2,6,7,25,2<br>8,29,30,31 | 1  | P01681                                                                              |
| 3234 | 1,3,4,5,8,2<br>6,28,29 | 2,6,7,25,2<br>7,30,31,32 | 3  | D3ZUC6,P47967,P97840                                                                |
| 3235 | 1,3,4,5,8,2<br>6,28,30 | 2,6,7,25,2<br>7,29,31,32 | 9  | O88797,P80299,P97840,Q4FZU2,Q6IFU7,Q6IFW6,Q6IG02,Q6IMF3,Q6P6Q2                      |
| 3236 | 1,3,4,5,8,2<br>6,28,31 | 2,6,7,25,2<br>7,29,30,32 | 1  | Q9R168                                                                              |
| 3237 | 1,3,4,5,8,2<br>6,28,32 | 2,6,7,25,2<br>7,29,30,31 | 2  | O54728,P01681                                                                       |
| 3238 | 1,3,4,5,8,2<br>6,29,30 | 2,6,7,25,2<br>7,28,31,32 | 9  | O88797,P49134,Q4FZU2,Q5RJR2,Q6IFU7,Q6IFW6,Q6IG02,Q6IMF3,Q6P6Q2                      |
| 3239 | 1,3,4,5,8,2<br>6,29,31 | 2,6,7,25,2<br>7,28,30,32 | 3  | P49134,Q5RJR2,Q9R168                                                                |
| 3240 | 1,3,4,5,8,2<br>6,29,32 | 2,6,7,25,2<br>7,28,30,31 | 1  | P01681                                                                              |
| 3241 | 1,3,4,5,8,2<br>6,30,31 | 2,6,7,25,2<br>7,28,29,32 | 8  | O88797,P49134,Q4FZU2,Q5RJR2,Q6IFW6,Q6IG02,Q6IMF3,Q6P6Q2                             |
| 3242 | 1,3,4,5,8,2<br>6,30,32 | 2,6,7,25,2<br>7,28,29,31 | 9  | O88797,P01681,P05539,Q4FZU2,Q6IFU7,Q6IFW6,Q6IG02,Q6IMF3,Q6P6Q2                      |
| 3243 | 1,3,4,5,8,2<br>6,31,32 | 2,6,7,25,2<br>7,28,29,30 | 2  | O54728,P01681                                                                       |
| 3244 | 1,3,4,5,8,2<br>7,28,29 | 2,6,7,25,2<br>6,30,31,32 | 3  | D3ZUC6,P47967,P97840                                                                |
| 3245 | 1,3,4,5,8,2<br>7,28,30 | 2,6,7,25,2<br>6,29,31,32 | 9  | P19218,P97840,Q10758,Q4FZU2,Q6IFU7,Q6IFW6,Q6IG02,Q6IMF3,Q6P6Q2                      |

|      |                         |                          |                                                                                 |
|------|-------------------------|--------------------------|---------------------------------------------------------------------------------|
| 3246 | 1,3,4,5,8,2<br>7,28,31  | 2,6,7,25,2<br>6,29,30,32 | 5 D3ZUC6,P01835,P23739,Q68G31,Q9R168                                            |
| 3247 | 1,3,4,5,8,2<br>7,28,32  | 2,6,7,25,2<br>6,29,30,31 | 2 P01681,P01835                                                                 |
| 3248 | 1,3,4,5,8,2<br>7,29,30  | 2,6,7,25,2<br>6,28,31,32 | 11 O88797,P19218,Q10758,Q4FZU2,Q6IFU7,Q6IFU8,Q6IFW6,Q6IG02,Q6IG05,Q6IMF3,Q6P6Q2 |
| 3249 | 1,3,4,5,8,2<br>7,29,31  | 2,6,7,25,2<br>6,28,30,32 | 2 Q68G31,Q9R168                                                                 |
| 3250 | 1,3,4,5,8,2<br>7,29,32  | 2,6,7,25,2<br>6,28,30,31 | 1 P01681                                                                        |
| 3251 | 1,3,4,5,8,2<br>7,30,31  | 2,6,7,25,2<br>6,28,29,32 | 11 P19218,P23739,Q10758,Q4FZU2,Q6IFU7,Q6IFU8,Q6IFW6,Q6IG02,Q6IG05,Q6IMF3,Q6P6Q2 |
| 3252 | 1,3,4,5,8,2<br>7,30,32  | 2,6,7,25,2<br>6,28,29,31 | 11 O88797,P01681,P19218,Q4FZU2,Q6IFU7,Q6IFU8,Q6IFW6,Q6IG02,Q6IG05,Q6IMF3,Q6P6Q2 |
| 3253 | 1,3,4,5,8,2<br>7,31,32  | 2,6,7,25,2<br>6,28,29,30 | 2 P01681,P23739                                                                 |
| 3254 | 1,3,4,5,8,2<br>8,29,30  | 2,6,7,25,2<br>6,27,31,32 | 8 O88797,P97840,Q4FZU2,Q6IFU7,Q6IFW6,Q6IG02,Q6IMF3,Q6P6Q2                       |
| 3255 | 1,3,4,5,8,2<br>8,29,31  | 2,6,7,25,2<br>6,27,30,32 | 2 D3ZUC6,Q9R168                                                                 |
| 3256 | 1,3,4,5,8,2<br>8,29,32  | 2,6,7,25,2<br>6,27,30,31 | 2 P01681,P97840                                                                 |
| 3257 | 1,3,4,5,8,2<br>8,30,31  | 2,6,7,25,2<br>6,27,29,32 | 6 Q4FZU2,Q6IFU7,Q6IFW6,Q6IG02,Q6IMF3,Q6P6Q2                                     |
| 3258 | 1,3,4,5,8,2<br>8,30,32  | 2,6,7,25,2<br>6,27,29,31 | 8 O88797,P01681,Q4FZU2,Q6IFU7,Q6IFW6,Q6IG02,Q6IMF3,Q6P6Q2                       |
| 3259 | 1,3,4,5,8,2<br>8,31,32  | 2,6,7,25,2<br>6,27,29,30 | 2 P01681,Q811M5                                                                 |
| 3260 | 1,3,4,5,8,2<br>9,30,31  | 2,6,7,25,2<br>6,27,28,32 | 9 O88797,Q4FZU2,Q5RJR2,Q6IFU7,Q6IFU8,Q6IFW6,Q6IG02,Q6IMF3,Q6P6Q2                |
| 3261 | 1,3,4,5,8,2<br>9,30,32  | 2,6,7,25,2<br>6,27,28,31 | 8 O88797,P01681,Q4FZU2,Q6IFU7,Q6IFW6,Q6IG02,Q6IMF3,Q6P6Q2                       |
| 3262 | 1,3,4,5,8,2<br>9,31,32  | 2,6,7,25,2<br>6,27,28,30 | 1 P01681                                                                        |
| 3263 | 1,3,4,5,8,3<br>0,31,32  | 2,6,7,25,2<br>6,27,28,29 | 9 O88797,P01681,P63081,Q4FZU2,Q6IFU7,Q6IFW6,Q6IG02,Q6IMF3,Q6P6Q2                |
| 3264 | 1,3,4,5,25,<br>26,27,28 | 2,6,7,8,29,<br>30,31,32  | 0                                                                               |
| 3265 | 1,3,4,5,25,<br>26,27,29 | 2,6,7,8,28,<br>30,31,32  | 2 O89117,P22006                                                                 |

|      |                                              |                                                           |
|------|----------------------------------------------|-----------------------------------------------------------|
| 3266 | 1,3,4,5,25, 2,6,7,8,28,<br>26,27,30 29,31,32 | 4 P21588,Q05511,Q6IFW6,Q6IG02                             |
| 3267 | 1,3,4,5,25, 2,6,7,8,28,<br>26,27,31 29,30,32 | 4 P23739,P29315,P62804,Q68G31                             |
| 3268 | 1,3,4,5,25, 2,6,7,8,28,<br>26,27,32 29,30,31 | 2 P01681,P62804                                           |
| 3269 | 1,3,4,5,25, 2,6,7,8,27,<br>26,28,29 30,31,32 | 0                                                         |
| 3270 | 1,3,4,5,25, 2,6,7,8,27,<br>26,28,30 29,31,32 | 1 P80299                                                  |
| 3271 | 1,3,4,5,25, 2,6,7,8,27,<br>26,28,31 29,30,32 | 2 P29315,P62804                                           |
| 3272 | 1,3,4,5,25, 2,6,7,8,27,<br>26,28,32 29,30,31 | 2 P01681,P62804                                           |
| 3273 | 1,3,4,5,25, 2,6,7,8,27,<br>26,29,30 28,31,32 | 3 Q6IFW6,Q6IG02,Q9QZK9                                    |
| 3274 | 1,3,4,5,25, 2,6,7,8,27,<br>26,29,31 28,30,32 | 1 P29315                                                  |
| 3275 | 1,3,4,5,25, 2,6,7,8,27,<br>26,29,32 28,30,31 | 1 P01681                                                  |
| 3276 | 1,3,4,5,25, 2,6,7,8,27,<br>26,30,31 28,29,32 | 8 P25809,P29315,P47727,P62804,Q00715,Q63617,Q6AYR9,Q812E4 |
| 3277 | 1,3,4,5,25, 2,6,7,8,27,<br>26,30,32 28,29,31 | 5 P01681,P25809,P62804,Q00715,Q06000                      |
| 3278 | 1,3,4,5,25, 2,6,7,8,27,<br>26,31,32 28,29,30 | 6 P01681,P25809,P29315,P62804,Q00715,Q4G075               |
| 3279 | 1,3,4,5,25, 2,6,7,8,26,<br>27,28,29 30,31,32 | 2 O89117,P20766                                           |
| 3280 | 1,3,4,5,25, 2,6,7,8,26,<br>27,28,30 29,31,32 | 3 Q6IFW6,Q6IG02,Q6P6Q2                                    |
| 3281 | 1,3,4,5,25, 2,6,7,8,26,<br>27,28,31 29,30,32 | 3 P23739,P29315,Q68G31                                    |
| 3282 | 1,3,4,5,25, 2,6,7,8,26,<br>27,28,32 29,30,31 | 2 P01681,Q62761;Q62762;Q62763                             |
| 3283 | 1,3,4,5,25, 2,6,7,8,26,<br>27,29,30 28,31,32 | 5 O89117,Q4FZU2,Q6IFW6,Q6IG02,Q6P6Q2                      |
| 3284 | 1,3,4,5,25, 2,6,7,8,26,<br>27,29,31 28,30,32 | 3 O89117,P29315,Q68G31                                    |
| 3285 | 1,3,4,5,25, 2,6,7,8,26,<br>27,29,32 28,30,31 | 1 P01681                                                  |



|      |                                              |                                                                                        |
|------|----------------------------------------------|----------------------------------------------------------------------------------------|
| 3286 | 1,3,4,5,25, 2,6,7,8,26,<br>27,30,31 28,29,32 | 8 P23739,P29315,P62804,Q4FZU2,Q6IFW6,Q6IG02,Q6P6Q2,Q9QYP1                              |
| 3287 | 1,3,4,5,25, 2,6,7,8,26,<br>27,30,32 28,29,31 | 9 P01681,P62804,Q4FZU2,Q6IFW6,Q6IG02,Q6P6Q2,Q6P6R2,Q9QX74,Q9WTT6                       |
| 3288 | 1,3,4,5,25, 2,6,7,8,26,<br>27,31,32 28,29,30 | 5 P01681,P23739,P29315,P62804,Q9QYP1                                                   |
| 3289 | 1,3,4,5,25, 2,6,7,8,26,<br>28,29,30 27,31,32 | 3 P20766,Q6IFW6,Q6IG02                                                                 |
| 3290 | 1,3,4,5,25, 2,6,7,8,26,<br>28,29,31 27,30,32 | 1 P29315                                                                               |
| 3291 | 1,3,4,5,25, 2,6,7,8,26,<br>28,29,32 27,30,31 | 2 P01681,P20766                                                                        |
| 3292 | 1,3,4,5,25, 2,6,7,8,26,<br>28,30,31 27,29,32 | 2 P25809,P29315                                                                        |
| 3293 | 1,3,4,5,25, 2,6,7,8,26,<br>28,30,32 27,29,31 | 6 P01681,P20766,P25809,Q62975,Q9QX74,Q9WTT6                                            |
| 3294 | 1,3,4,5,25, 2,6,7,8,26,<br>28,31,32 27,29,30 | 5 P01681,P25809,P29315,P62804,Q811M5                                                   |
| 3295 | 1,3,4,5,25, 2,6,7,8,26,<br>29,30,31 27,28,32 | 7 P07150,P25809,P50280,Q4FZU2,Q6IFW6,Q6IG02,Q9QWN8                                     |
| 3296 | 1,3,4,5,25, 2,6,7,8,26,<br>29,30,32 27,28,31 | 7 P01681,P07150,P25809,Q4FZU2,Q6IFW6,Q6IG02,Q9WTT6                                     |
| 3297 | 1,3,4,5,25, 2,6,7,8,26,<br>29,31,32 27,28,30 | 5 P01681,P07150,P25809,P62804,Q9WTT6                                                   |
| 3298 | 1,3,4,5,25, 2,6,7,8,26,<br>30,31,32 27,28,29 | 12 P01681,P07150,P25809,P62804,P97584,Q00715,Q4FZU2,Q4G075,Q6P6R2,Q812E4,Q9QX74,Q9WTT6 |
| 3299 | 1,3,4,5,26, 2,6,7,8,25,<br>27,28,29 30,31,32 | 3 O54858,P47967,P97840                                                                 |
| 3300 | 1,3,4,5,26, 2,6,7,8,25,<br>27,28,30 29,31,32 | 2 P21588,P97840                                                                        |
| 3301 | 1,3,4,5,26, 2,6,7,8,25,<br>27,28,31 29,30,32 | 1 Q68G31                                                                               |
| 3302 | 1,3,4,5,26, 2,6,7,8,25,<br>27,28,32 29,30,31 | 3 P62804,P97840,Q62761;Q62762;Q62763                                                   |
| 3303 | 1,3,4,5,26, 2,6,7,8,25,<br>27,29,30 28,31,32 | 5 P21588,P97840,Q6IFW6,Q6IG02,Q6P6Q2                                                   |
| 3304 | 1,3,4,5,26, 2,6,7,8,25,<br>27,29,31 28,30,32 | 2 P02631,Q68G31                                                                        |
| 3305 | 1,3,4,5,26, 2,6,7,8,25,<br>27,29,32 28,30,31 | 1 P12020                                                                               |

|      |                                              |                                                                          |
|------|----------------------------------------------|--------------------------------------------------------------------------|
| 3306 | 1,3,4,5,26, 2,6,7,8,25,<br>27,30,31 28,29,32 | 3 P02631,P62804,Q6IG02                                                   |
| 3307 | 1,3,4,5,26, 2,6,7,8,25,<br>27,30,32 28,29,31 | 2 P12020,P62804                                                          |
| 3308 | 1,3,4,5,26, 2,6,7,8,25,<br>27,31,32 28,29,30 | 3 P02631,P23739,P62804                                                   |
| 3309 | 1,3,4,5,26, 2,6,7,8,25,<br>28,29,30 27,31,32 | 3 P20766,P97840,Q6IG02                                                   |
| 3310 | 1,3,4,5,26, 2,6,7,8,25,<br>28,29,31 27,30,32 | 2 P97840,Q68G31                                                          |
| 3311 | 1,3,4,5,26, 2,6,7,8,25,<br>28,29,32 27,30,31 | 1 P97840                                                                 |
| 3312 | 1,3,4,5,26, 2,6,7,8,25,<br>28,30,31 27,29,32 | 1 P25809                                                                 |
| 3313 | 1,3,4,5,26, 2,6,7,8,25,<br>28,30,32 27,29,31 | 3 P50115,P97840,Q4G075                                                   |
| 3314 | 1,3,4,5,26, 2,6,7,8,25,<br>28,31,32 27,29,30 | 3 O54728,P62804,Q4G075                                                   |
| 3315 | 1,3,4,5,26, 2,6,7,8,25,<br>29,30,31 27,28,32 | 3 P02631,Q6IG02,Q9QWN8                                                   |
| 3316 | 1,3,4,5,26, 2,6,7,8,25,<br>29,30,32 27,28,31 | 2 P50115,Q6IG02                                                          |
| 3317 | 1,3,4,5,26, 2,6,7,8,25,<br>29,31,32 27,28,30 | 2 P02631,P62804                                                          |
| 3318 | 1,3,4,5,26, 2,6,7,8,25,<br>30,31,32 27,28,29 | 10 P02631,P25809,P47727,P50115,P62804,P63081,Q00715,Q4G075,Q812E4,Q9WTT6 |
| 3319 | 1,3,4,5,27, 2,6,7,8,25,<br>28,29,30 26,31,32 | 6 P20766,P47967,P97840,Q6IFW6,Q6IG02,Q6P6Q2                              |
| 3320 | 1,3,4,5,27, 2,6,7,8,25,<br>28,29,31 26,30,32 | 2 P97840,Q68G31                                                          |
| 3321 | 1,3,4,5,27, 2,6,7,8,25,<br>28,29,32 26,30,31 | 5 O54858,P20766,P47967,P97840,Q62761;Q62762;Q62763                       |
| 3322 | 1,3,4,5,27, 2,6,7,8,25,<br>28,30,31 26,29,32 | 2 P23739,Q6IG02                                                          |
| 3323 | 1,3,4,5,27, 2,6,7,8,25,<br>28,30,32 26,29,31 | 3 P97840,Q8VD89,Q9QX74                                                   |
| 3324 | 1,3,4,5,27, 2,6,7,8,25,<br>28,31,32 26,29,30 | 3 P23739,P62804,Q62761;Q62762;Q62763                                     |
| 3325 | 1,3,4,5,27, 2,6,7,8,25,<br>29,30,31 26,28,32 | 7 P02631,P08649,Q4FZU2,Q6IFW6,Q6IG02,Q6IMF3,Q6P6Q2                       |

|      |                                                  |                                                                                 |
|------|--------------------------------------------------|---------------------------------------------------------------------------------|
| 3326 | 1,3,4,5,27, 2,6,7,8,25,<br>29,30,32 26,28,31     | 6 P08649,Q4FZU2,Q63598,Q6IFW6,Q6IG02,Q6P6Q2                                     |
| 3327 | 1,3,4,5,27, 2,6,7,8,25,<br>29,31,32 26,28,30     | 3 P02631,P08649,P62804                                                          |
| 3328 | 1,3,4,5,27, 2,6,7,8,25,<br>30,31,32 26,28,29     | 9 P08649,P23739,P62804,Q4FZU2,Q6IG02,Q6P6Q2,Q6P6R2,Q9QX74,Q9WTT6                |
| 3329 | 1,3,4,5,28, 2,6,7,8,25,<br>29,30,31 26,27,32     | 2 P50115,Q6IG02                                                                 |
| 3330 | 1,3,4,5,28, 2,6,7,8,25,<br>29,30,32 26,27,31     | 5 P20766,P50115,P97840,Q62894,Q6IG02                                            |
| 3331 | 1,3,4,5,28, 2,6,7,8,25,<br>29,31,32 26,27,30     | 1 P50115                                                                        |
| 3332 | 1,3,4,5,28, 2,6,7,8,25,<br>30,31,32 26,27,29     | 7 P25809,P50115,P62804,Q00715,Q4G075,Q9QX74,Q9WTT6                              |
| 3333 | 1,3,4,5,29, 2,6,7,8,25,<br>30,31,32 26,27,28     | 9 P07150,P08649,P25809,P26342,P36860,P50115,P63081,Q6IG02,Q9WTT6                |
| 3334 | 1,3,4,6,7,8 2,5,27,28,<br>,25,26 29,30,31,3<br>2 | 5 O70417,P02783,P06911,P49134,Q99041                                            |
| 3335 | 1,3,4,6,7,8 2,5,26,28,<br>,25,27 29,30,31,3<br>2 | 7 O70417,P02783,P06911,P22273,P22282,P50115,Q99041                              |
| 3336 | 1,3,4,6,7,8 2,5,26,27,<br>,25,28 29,30,31,3<br>2 | 10 O70417,P06911,P11598,P22273,P22282,P36860,Q63617,Q99041,Q9JI85,Q9QW07        |
| 3337 | 1,3,4,6,7,8 2,5,26,27,<br>,25,29 28,30,31,3<br>2 | 5 O70417,P02783,P06911,P48032,P49134                                            |
| 3338 | 1,3,4,6,7,8 2,5,26,27,<br>,25,30 28,29,31,3<br>2 | 6 O70417,P06911,P49134,Q6IFW6,Q6IG02,Q99041                                     |
| 3339 | 1,3,4,6,7,8 2,5,26,27,<br>,25,31 28,29,30,3<br>2 | 7 O70417,P01681,P06911,P12020,P49134,Q09030,Q63532                              |
| 3340 | 1,3,4,6,7,8 2,5,26,27,<br>,25,32 28,29,30,3<br>1 | 4 O70417,P01681,P06911,Q99041                                                   |
| 3341 | 1,3,4,6,7,8 2,5,25,28,<br>,26,27 29,30,31,3<br>2 | 11 O70417,P02783,P06911,P11598,P15399,P22273,P22282,P97580,Q30KJ2,Q62894,Q99041 |

|      |                       |                               |    |                                                                                                                        |
|------|-----------------------|-------------------------------|----|------------------------------------------------------------------------------------------------------------------------|
| 3342 | 1,3,4,6,7,8<br>,26,28 | 2,5,25,27,<br>29,30,31,3<br>2 | 14 | D3ZUC6,O70417,P02783,P06761,P06911,P11598,P21674,P22273,P22282,P49134,Q63617,Q99041,Q9JI85,Q9QW07                      |
| 3343 | 1,3,4,6,7,8<br>,26,29 | 2,5,25,27,<br>28,30,31,3<br>2 | 9  | P02783,P06911,P11598,P21674,P22273,P49134,P70549,Q99041,Q9QX74                                                         |
| 3344 | 1,3,4,6,7,8<br>,26,30 | 2,5,25,27,<br>28,29,31,3<br>2 | 4  | O70417,P02783,P49134,Q99041                                                                                            |
| 3345 | 1,3,4,6,7,8<br>,26,31 | 2,5,25,27,<br>28,29,30,3<br>2 | 7  | P02783,P06911,P49134,P57113,Q05702,Q63532,Q99041                                                                       |
| 3346 | 1,3,4,6,7,8<br>,26,32 | 2,5,25,27,<br>28,29,30,3<br>1 | 5  | O70417,P02783,P11598,P57113,Q99041                                                                                     |
| 3347 | 1,3,4,6,7,8<br>,27,28 | 2,5,25,26,<br>29,30,31,3<br>2 | 17 | D3ZUC6,O70417,P02783,P06761,P06911,P11598,P19218,P22273,P22282,P22283,Q5M8C6,Q62902,Q63617,Q68FX1,Q99041,Q9JI85,Q9QW07 |
| 3348 | 1,3,4,6,7,8<br>,27,29 | 2,5,25,26,<br>28,30,31,3<br>2 | 11 | O70417,P02783,P06761,P06911,P09656,P11598,P22273,P22282,Q4G075,Q63617,Q99041                                           |
| 3349 | 1,3,4,6,7,8<br>,27,30 | 2,5,25,26,<br>28,29,31,3<br>2 | 12 | O70417,P02783,P06911,P19218,P22273,P22282,P97580,Q6IFU7,Q6IFW6,Q6IG02,Q6P6Q2,Q99041                                    |
| 3350 | 1,3,4,6,7,8<br>,27,31 | 2,5,25,26,<br>28,29,30,3<br>2 | 9  | O70417,P02783,P06911,P11598,P22273,P22282,Q62894,Q99041,Q9QZK9                                                         |
| 3351 | 1,3,4,6,7,8<br>,27,32 | 2,5,25,26,<br>28,29,30,3<br>1 | 9  | O70417,P00714,P02783,P06911,P11598,P22273,P22282,P98166,Q99041                                                         |
| 3352 | 1,3,4,6,7,8<br>,28,29 | 2,5,25,26,<br>27,30,31,3<br>2 | 17 | D3ZUC6,P02783,P06761,P06911,P11598,P21674,P22273,P22282,P22283,P49134,P97840,Q5M8C6,Q63493,Q63617,Q99041,Q9JI85,Q9QW07 |
| 3353 | 1,3,4,6,7,8<br>,28,30 | 2,5,25,26,<br>27,29,31,3<br>2 | 9  | O70417,P06911,P11598,P19218,P21674,P49134,Q63617,Q99041,Q9QW07                                                         |
| 3354 | 1,3,4,6,7,8<br>,28,31 | 2,5,25,26,<br>27,29,30,3<br>2 | 10 | D3ZUC6,P06911,P11598,P21674,Q63532,Q63617,Q811M5,Q99041,Q9JI85,Q9QW07                                                  |

|      |                        |                               |    |                                                                              |
|------|------------------------|-------------------------------|----|------------------------------------------------------------------------------|
| 3355 | 1,3,4,6,7,8<br>,28,32  | 2,5,25,26,<br>27,29,30,3<br>1 | 11 | O70417,P06911,P08723,P11598,P22282,Q5M8C6,Q62902,Q63617,Q99041,Q9JI85,Q9QW07 |
| 3356 | 1,3,4,6,7,8<br>,29,30  | 2,5,25,26,<br>27,28,31,3<br>2 | 10 | O70417,P02783,P06911,P19218,P21674,P49134,Q5RJR2,Q6IFW6,Q6IG02,Q99041        |
| 3357 | 1,3,4,6,7,8<br>,29,31  | 2,5,25,26,<br>27,28,30,3<br>2 | 5  | P02783,P06911,P21674,P49134,Q99041                                           |
| 3358 | 1,3,4,6,7,8<br>,29,32  | 2,5,25,26,<br>27,28,30,3<br>1 | 4  | P00714,P02783,P11598,Q99041                                                  |
| 3359 | 1,3,4,6,7,8<br>,30,31  | 2,5,25,26,<br>27,28,29,3<br>2 | 8  | O70417,P02783,P06911,P49134,Q5RJR2,Q63532,Q6IFW6,Q99041                      |
| 3360 | 1,3,4,6,7,8<br>,30,32  | 2,5,25,26,<br>27,28,29,3<br>1 | 5  | O70417,P00714,P02783,P35280,Q99041                                           |
| 3361 | 1,3,4,6,7,8<br>,31,32  | 2,5,25,26,<br>27,28,29,3<br>0 | 7  | P01681,P02783,P06911,P57113,Q63532,Q99041,Q9QZK9                             |
| 3362 | 1,3,4,6,7,2<br>5,26,27 | 2,5,8,28,2<br>9,30,31,32      | 2  | P02783,P63081                                                                |
| 3363 | 1,3,4,6,7,2<br>5,26,28 | 2,5,8,27,2<br>9,30,31,32      | 1  | Q62975                                                                       |
| 3364 | 1,3,4,6,7,2<br>5,26,29 | 2,5,8,27,2<br>8,30,31,32      | 2  | P02783,P70549                                                                |
| 3365 | 1,3,4,6,7,2<br>5,26,30 | 2,5,8,27,2<br>8,29,31,32      | 1  | P25809                                                                       |
| 3366 | 1,3,4,6,7,2<br>5,26,31 | 2,5,8,27,2<br>8,29,30,32      | 3  | P25809,P29315,P57113                                                         |
| 3367 | 1,3,4,6,7,2<br>5,26,32 | 2,5,8,27,2<br>8,29,30,31      | 2  | P25809,Q06000                                                                |
| 3368 | 1,3,4,6,7,2<br>5,27,28 | 2,5,8,26,2<br>9,30,31,32      | 3  | P11598,P63081,Q63617                                                         |
| 3369 | 1,3,4,6,7,2<br>5,27,29 | 2,5,8,26,2<br>8,30,31,32      | 2  | P02783,P09656                                                                |
| 3370 | 1,3,4,6,7,2<br>5,27,30 | 2,5,8,26,2<br>8,29,31,32      | 1  | O70417                                                                       |
| 3371 | 1,3,4,6,7,2<br>5,27,31 | 2,5,8,26,2<br>8,29,30,32      | 3  | P29315,Q62894,Q9QYP1                                                         |

|      |                        |                          |                                                    |
|------|------------------------|--------------------------|----------------------------------------------------|
| 3372 | 1,3,4,6,7,2<br>5,27,32 | 2,5,8,26,2<br>8,29,30,31 | 0                                                  |
| 3373 | 1,3,4,6,7,2<br>5,28,29 | 2,5,8,26,2<br>7,30,31,32 | 2 Q63617,Q9QW07                                    |
| 3374 | 1,3,4,6,7,2<br>5,28,30 | 2,5,8,26,2<br>7,29,31,32 | 3 O70417,P25809,Q62975                             |
| 3375 | 1,3,4,6,7,2<br>5,28,31 | 2,5,8,26,2<br>7,29,30,32 | 2 P25809,P29315                                    |
| 3376 | 1,3,4,6,7,2<br>5,28,32 | 2,5,8,26,2<br>7,29,30,31 | 3 P11598,Q5PQL7,Q62975                             |
| 3377 | 1,3,4,6,7,2<br>5,29,30 | 2,5,8,26,2<br>7,28,31,32 | 3 P02783,Q6IG02,Q9QWN8                             |
| 3378 | 1,3,4,6,7,2<br>5,29,31 | 2,5,8,26,2<br>7,28,30,32 | 2 P25809,Q9QWN8                                    |
| 3379 | 1,3,4,6,7,2<br>5,29,32 | 2,5,8,26,2<br>7,28,30,31 | 0                                                  |
| 3380 | 1,3,4,6,7,2<br>5,30,31 | 2,5,8,26,2<br>7,28,29,32 | 2 P25809,Q9QWN8                                    |
| 3381 | 1,3,4,6,7,2<br>5,30,32 | 2,5,8,26,2<br>7,28,29,31 | 5 P25809,P26342,Q5PQL7,Q62975,Q6P6R2               |
| 3382 | 1,3,4,6,7,2<br>5,31,32 | 2,5,8,26,2<br>7,28,29,30 | 2 P01681,P25809                                    |
| 3383 | 1,3,4,6,7,2<br>6,27,28 | 2,5,8,25,2<br>9,30,31,32 | 6 P02783,P09656,P11598,P21588,P97840,Q63617        |
| 3384 | 1,3,4,6,7,2<br>6,27,29 | 2,5,8,25,2<br>8,30,31,32 | 4 P02783,P09656,P21588,P70549                      |
| 3385 | 1,3,4,6,7,2<br>6,27,30 | 2,5,8,25,2<br>8,29,31,32 | 2 P02783,P21588                                    |
| 3386 | 1,3,4,6,7,2<br>6,27,31 | 2,5,8,25,2<br>8,29,30,32 | 2 P02783,Q62894                                    |
| 3387 | 1,3,4,6,7,2<br>6,27,32 | 2,5,8,25,2<br>8,29,30,31 | 2 P02783,P11598                                    |
| 3388 | 1,3,4,6,7,2<br>6,28,29 | 2,5,8,25,2<br>7,30,31,32 | 7 P02783,P11598,P21674,P47967,P70549,P97840,Q63617 |
| 3389 | 1,3,4,6,7,2<br>6,28,30 | 2,5,8,25,2<br>7,29,31,32 | 1 P97840                                           |
| 3390 | 1,3,4,6,7,2<br>6,28,31 | 2,5,8,25,2<br>7,29,30,32 | 2 P11598,P57113                                    |
| 3391 | 1,3,4,6,7,2<br>6,28,32 | 2,5,8,25,2<br>7,29,30,31 | 1 P11598                                           |

|      |                        |                          |   |                                                         |
|------|------------------------|--------------------------|---|---------------------------------------------------------|
| 3392 | 1,3,4,6,7,2<br>6,29,30 | 2,5,8,25,2<br>7,28,31,32 | 1 | P02783                                                  |
| 3393 | 1,3,4,6,7,2<br>6,29,31 | 2,5,8,25,2<br>7,28,30,32 | 2 | P02783,P70549                                           |
| 3394 | 1,3,4,6,7,2<br>6,29,32 | 2,5,8,25,2<br>7,28,30,31 | 1 | P02783                                                  |
| 3395 | 1,3,4,6,7,2<br>6,30,31 | 2,5,8,25,2<br>7,28,29,32 | 3 | P02783,P25809,P57113                                    |
| 3396 | 1,3,4,6,7,2<br>6,30,32 | 2,5,8,25,2<br>7,28,29,31 | 2 | P02783,P25809                                           |
| 3397 | 1,3,4,6,7,2<br>6,31,32 | 2,5,8,25,2<br>7,28,29,30 | 4 | P02783,P22006,P25809,P57113                             |
| 3398 | 1,3,4,6,7,2<br>7,28,29 | 2,5,8,25,2<br>6,30,31,32 | 8 | P00507,P02783,P09656,P11598,P22283,P47967,P97840,Q63617 |
| 3399 | 1,3,4,6,7,2<br>7,28,30 | 2,5,8,25,2<br>6,29,31,32 | 3 | P11598,P19218,P97840                                    |
| 3400 | 1,3,4,6,7,2<br>7,28,31 | 2,5,8,25,2<br>6,29,30,32 | 3 | P11598,Q63617,Q68G31                                    |
| 3401 | 1,3,4,6,7,2<br>7,28,32 | 2,5,8,25,2<br>6,29,30,31 | 4 | P11598,P22283,Q62761;Q62762;Q62763,Q63617               |
| 3402 | 1,3,4,6,7,2<br>7,29,30 | 2,5,8,25,2<br>6,28,31,32 | 3 | P02783,P09656,Q6IG02                                    |
| 3403 | 1,3,4,6,7,2<br>7,29,31 | 2,5,8,25,2<br>6,28,30,32 | 2 | P02783,Q68G31                                           |
| 3404 | 1,3,4,6,7,2<br>7,29,32 | 2,5,8,25,2<br>6,28,30,31 | 4 | P00714,P02783,P09656,P11598                             |
| 3405 | 1,3,4,6,7,2<br>7,30,31 | 2,5,8,25,2<br>6,28,29,32 | 1 | P02783                                                  |
| 3406 | 1,3,4,6,7,2<br>7,30,32 | 2,5,8,25,2<br>6,28,29,31 | 3 | P00714,P02783,Q8VD89                                    |
| 3407 | 1,3,4,6,7,2<br>7,31,32 | 2,5,8,25,2<br>6,28,29,30 | 4 | P00714,P02783,P22006,P80299                             |
| 3408 | 1,3,4,6,7,2<br>8,29,30 | 2,5,8,25,2<br>6,27,31,32 | 4 | P02783,P21674,P97840,Q63617                             |
| 3409 | 1,3,4,6,7,2<br>8,29,31 | 2,5,8,25,2<br>6,27,30,32 | 4 | P11598,P21674,P70549,Q63617                             |
| 3410 | 1,3,4,6,7,2<br>8,29,32 | 2,5,8,25,2<br>6,27,30,31 | 3 | P11598,P97840,Q63617                                    |
| 3411 | 1,3,4,6,7,2<br>8,30,31 | 2,5,8,25,2<br>6,27,29,32 | 1 | P25809                                                  |

|      |                        |                          |                                                                  |
|------|------------------------|--------------------------|------------------------------------------------------------------|
| 3412 | 1,3,4,6,7,2<br>8,30,32 | 2,5,8,25,2<br>6,27,29,31 | 2 Q62975,Q8VVD89                                                 |
| 3413 | 1,3,4,6,7,2<br>8,31,32 | 2,5,8,25,2<br>6,27,29,30 | 3 P11598,P22006,P25809                                           |
| 3414 | 1,3,4,6,7,2<br>9,30,31 | 2,5,8,25,2<br>6,27,28,32 | 4 P02783,P25809,P26342,Q9QWN8                                    |
| 3415 | 1,3,4,6,7,2<br>9,30,32 | 2,5,8,25,2<br>6,27,28,31 | 3 P00714,P02783,P26342                                           |
| 3416 | 1,3,4,6,7,2<br>9,31,32 | 2,5,8,25,2<br>6,27,28,30 | 4 P00714,P02783,P26342,P80299                                    |
| 3417 | 1,3,4,6,7,3<br>0,31,32 | 2,5,8,25,2<br>6,27,28,29 | 6 P02783,P06760,P22006,P25809,P26342,Q6P6R2                      |
| 3418 | 1,3,4,6,8,2<br>5,26,27 | 2,5,7,28,2<br>9,30,31,32 | 8 O70417,P02783,P08649,P15399,P54921,P97580,Q06000,Q30KJ2        |
| 3419 | 1,3,4,6,8,2<br>5,26,28 | 2,5,7,27,2<br>9,30,31,32 | 6 O70417,P06911,P08649,P80299,Q06000,Q9QW07                      |
| 3420 | 1,3,4,6,8,2<br>5,26,29 | 2,5,7,27,2<br>8,30,31,32 | 2 P02783,P70549                                                  |
| 3421 | 1,3,4,6,8,2<br>5,26,30 | 2,5,7,27,2<br>8,29,31,32 | 7 O70417,O88797,P54921,P80299,Q06000,Q6AY61,Q6IFW6               |
| 3422 | 1,3,4,6,8,2<br>5,26,31 | 2,5,7,27,2<br>8,29,30,32 | 3 P29315,P54921,Q05702                                           |
| 3423 | 1,3,4,6,8,2<br>5,26,32 | 2,5,7,27,2<br>8,29,30,31 | 4 P01681,P08649,P13432,Q06000                                    |
| 3424 | 1,3,4,6,8,2<br>5,27,28 | 2,5,7,26,2<br>9,30,31,32 | 6 O70417,P06911,P15399,P36860,Q9JI85,Q9QW07                      |
| 3425 | 1,3,4,6,8,2<br>5,27,29 | 2,5,7,26,2<br>8,30,31,32 | 2 P02783,P09656                                                  |
| 3426 | 1,3,4,6,8,2<br>5,27,30 | 2,5,7,26,2<br>8,29,31,32 | 9 O70417,P15399,P54921,P97580,Q30KJ2,Q6IFU7,Q6IFW6,Q6IG02,Q6P6Q2 |
| 3427 | 1,3,4,6,8,2<br>5,27,31 | 2,5,7,26,2<br>8,29,30,32 | 5 P01681,P06911,P29315,P54921,Q9R168                             |
| 3428 | 1,3,4,6,8,2<br>5,27,32 | 2,5,7,26,2<br>8,29,30,31 | 4 O70417,P00762,P01681,P98166                                    |
| 3429 | 1,3,4,6,8,2<br>5,28,29 | 2,5,7,26,2<br>7,30,31,32 | 2 P06911,Q9QW07                                                  |
| 3430 | 1,3,4,6,8,2<br>5,28,30 | 2,5,7,26,2<br>7,29,31,32 | 3 O70417,P06911,Q9QW07                                           |
| 3431 | 1,3,4,6,8,2<br>5,28,31 | 2,5,7,26,2<br>7,29,30,32 | 2 P06911,P29315                                                  |



|      |                        |                          |   |                                                         |
|------|------------------------|--------------------------|---|---------------------------------------------------------|
| 3432 | 1,3,4,6,8,2<br>5,28,32 | 2,5,7,26,2<br>7,29,30,31 | 3 | P01681,Q9JI85,Q9QW07                                    |
| 3433 | 1,3,4,6,8,2<br>5,29,30 | 2,5,7,26,2<br>7,28,31,32 | 6 | O70417,O88797,P02783,Q6IFU7,Q6IFW6,Q6IG02               |
| 3434 | 1,3,4,6,8,2<br>5,29,31 | 2,5,7,26,2<br>7,28,30,32 | 4 | P02783,P06911,P29315,P70549                             |
| 3435 | 1,3,4,6,8,2<br>5,29,32 | 2,5,7,26,2<br>7,28,30,31 | 3 | P01681,P02783,P13432                                    |
| 3436 | 1,3,4,6,8,2<br>5,30,31 | 2,5,7,26,2<br>7,28,29,32 | 7 | O70417,P02625,P54921,Q09030,Q6AY61,Q6IFW6,Q6IG02        |
| 3437 | 1,3,4,6,8,2<br>5,30,32 | 2,5,7,26,2<br>7,28,29,31 | 5 | O70417,O88797,P01681,P02625,Q6IFW6                      |
| 3438 | 1,3,4,6,8,2<br>5,31,32 | 2,5,7,26,2<br>7,28,29,30 | 2 | P01681,P29315                                           |
| 3439 | 1,3,4,6,8,2<br>6,27,28 | 2,5,7,25,2<br>9,30,31,32 | 8 | P02783,P09656,P15399,P22282,P97580,Q30KJ2,Q9JI85,Q9QW07 |
| 3440 | 1,3,4,6,8,2<br>6,27,29 | 2,5,7,25,2<br>8,30,31,32 | 6 | P02783,P09656,P15399,P70549,P97580,Q30KJ2               |
| 3441 | 1,3,4,6,8,2<br>6,27,30 | 2,5,7,25,2<br>8,29,31,32 | 8 | O70417,P02783,P15399,P97580,Q30KJ2,Q6AY61,Q6IFW6,Q6IG02 |
| 3442 | 1,3,4,6,8,2<br>6,27,31 | 2,5,7,25,2<br>8,29,30,32 | 6 | P02783,P15399,P54921,P97580,Q30KJ2,Q9R168               |
| 3443 | 1,3,4,6,8,2<br>6,27,32 | 2,5,7,25,2<br>8,29,30,31 | 4 | P02783,P15399,P97580,Q30KJ2                             |
| 3444 | 1,3,4,6,8,2<br>6,28,29 | 2,5,7,25,2<br>7,30,31,32 | 6 | P02783,P09656,P21674,P70549,Q9JI85,Q9QW07               |
| 3445 | 1,3,4,6,8,2<br>6,28,30 | 2,5,7,25,2<br>7,29,31,32 | 1 | O70417                                                  |
| 3446 | 1,3,4,6,8,2<br>6,28,31 | 2,5,7,25,2<br>7,29,30,32 | 1 | P70549                                                  |
| 3447 | 1,3,4,6,8,2<br>6,28,32 | 2,5,7,25,2<br>7,29,30,31 | 3 | O54728,Q9JI85,Q9QW07                                    |
| 3448 | 1,3,4,6,8,2<br>6,29,30 | 2,5,7,25,2<br>7,28,31,32 | 3 | O88797,P02783,Q6IG02                                    |
| 3449 | 1,3,4,6,8,2<br>6,29,31 | 2,5,7,25,2<br>7,28,30,32 | 2 | P02783,P70549                                           |
| 3450 | 1,3,4,6,8,2<br>6,29,32 | 2,5,7,25,2<br>7,28,30,31 | 1 | P02783                                                  |
| 3451 | 1,3,4,6,8,2<br>6,30,31 | 2,5,7,25,2<br>7,28,29,32 | 4 | P02783,P54921,Q5RJR2,Q6AY61                             |

|      |                        |                          |    |                                                                       |
|------|------------------------|--------------------------|----|-----------------------------------------------------------------------|
| 3452 | 1,3,4,6,8,2<br>6,30,32 | 2,5,7,25,2<br>7,28,29,31 | 2  | O88797,P02783                                                         |
| 3453 | 1,3,4,6,8,2<br>6,31,32 | 2,5,7,25,2<br>7,28,29,30 | 3  | O54728,P02783,Q05702                                                  |
| 3454 | 1,3,4,6,8,2<br>7,28,29 | 2,5,7,25,2<br>6,30,31,32 | 6  | P02783,P09656,P22282,Q812E4,Q9JI85,Q9QW07                             |
| 3455 | 1,3,4,6,8,2<br>7,28,30 | 2,5,7,25,2<br>6,29,31,32 | 8  | O70417,P15399,P19218,Q10758,Q6IFU7,Q6IG02,Q6P6S4,Q8VD89               |
| 3456 | 1,3,4,6,8,2<br>7,28,31 | 2,5,7,25,2<br>6,29,30,32 | 1  | Q9R168                                                                |
| 3457 | 1,3,4,6,8,2<br>7,28,32 | 2,5,7,25,2<br>6,29,30,31 | 7  | P15399,P22282,Q62902,Q6AYR9,Q6P6S4,Q9JI85,Q9QW07                      |
| 3458 | 1,3,4,6,8,2<br>7,29,30 | 2,5,7,25,2<br>6,28,31,32 | 10 | O70417,P02783,P09656,P19218,Q10758,Q6IFU7,Q6IFW6,Q6IG02,Q6IMF3,Q6P6Q2 |
| 3459 | 1,3,4,6,8,2<br>7,29,31 | 2,5,7,25,2<br>6,28,30,32 | 2  | P02783,Q9R168                                                         |
| 3460 | 1,3,4,6,8,2<br>7,29,32 | 2,5,7,25,2<br>6,28,30,31 | 3  | P02783,P09656,P98166                                                  |
| 3461 | 1,3,4,6,8,2<br>7,30,31 | 2,5,7,25,2<br>6,28,29,32 | 7  | O70417,P02783,P19218,P54921,Q6IFW6,Q6IG02,Q6P6Q2                      |
| 3462 | 1,3,4,6,8,2<br>7,30,32 | 2,5,7,25,2<br>6,28,29,31 | 8  | O70417,P02783,P15399,P19218,Q6IFU7,Q6IFW6,Q6IG02,Q8VD89               |
| 3463 | 1,3,4,6,8,2<br>7,31,32 | 2,5,7,25,2<br>6,28,29,30 | 4  | P01681,P02783,P22006,Q9QZK9                                           |
| 3464 | 1,3,4,6,8,2<br>8,29,30 | 2,5,7,25,2<br>6,27,31,32 | 5  | P02783,P21674,Q6IFU7,Q6IG02,Q9QW07                                    |
| 3465 | 1,3,4,6,8,2<br>8,29,31 | 2,5,7,25,2<br>6,27,30,32 | 3  | P21674,P70549,Q9R168                                                  |
| 3466 | 1,3,4,6,8,2<br>8,29,32 | 2,5,7,25,2<br>6,27,30,31 | 3  | P02783,Q9JI85,Q9QW07                                                  |
| 3467 | 1,3,4,6,8,2<br>8,30,31 | 2,5,7,25,2<br>6,27,29,32 | 1  | Q63532                                                                |
| 3468 | 1,3,4,6,8,2<br>8,30,32 | 2,5,7,25,2<br>6,27,29,31 | 2  | O70417,Q8VD89                                                         |
| 3469 | 1,3,4,6,8,2<br>8,31,32 | 2,5,7,25,2<br>6,27,29,30 | 3  | P22006,Q63532,Q9JI85                                                  |
| 3470 | 1,3,4,6,8,2<br>9,30,31 | 2,5,7,25,2<br>6,27,28,32 | 4  | P02783,Q5RJR2,Q6IFW6,Q6IG02                                           |
| 3471 | 1,3,4,6,8,2<br>9,30,32 | 2,5,7,25,2<br>6,27,28,31 | 5  | O88797,P02783,Q6IFU7,Q6IFW6,Q6IG02                                    |

|      |                         |                          |   |                                                         |
|------|-------------------------|--------------------------|---|---------------------------------------------------------|
| 3472 | 1,3,4,6,8,2<br>9,31,32  | 2,5,7,25,2<br>6,27,28,30 | 1 | P02783                                                  |
| 3473 | 1,3,4,6,8,3<br>0,31,32  | 2,5,7,25,2<br>6,27,28,29 | 4 | P02625,P02783,P20646,P22006                             |
| 3474 | 1,3,4,6,25,<br>26,27,28 | 2,5,7,8,29,<br>30,31,32  | 2 | P09656,Q06000                                           |
| 3475 | 1,3,4,6,25,<br>26,27,29 | 2,5,7,8,28,<br>30,31,32  | 3 | P02783,P09656,P70549                                    |
| 3476 | 1,3,4,6,25,<br>26,27,30 | 2,5,7,8,28,<br>29,31,32  | 2 | P21588,Q06000                                           |
| 3477 | 1,3,4,6,25,<br>26,27,31 | 2,5,7,8,28,<br>29,30,32  | 4 | P29315,P54921,P62804,Q9QYP1                             |
| 3478 | 1,3,4,6,25,<br>26,27,32 | 2,5,7,8,28,<br>29,30,31  | 3 | P06760,P62804,Q06000                                    |
| 3479 | 1,3,4,6,25,<br>26,28,29 | 2,5,7,8,27,<br>30,31,32  | 2 | P09656,P70549                                           |
| 3480 | 1,3,4,6,25,<br>26,28,30 | 2,5,7,8,27,<br>29,31,32  | 4 | P06760,P25809,Q06000,Q62975                             |
| 3481 | 1,3,4,6,25,<br>26,28,31 | 2,5,7,8,27,<br>29,30,32  | 4 | P25809,P29315,P62804,P70549                             |
| 3482 | 1,3,4,6,25,<br>26,28,32 | 2,5,7,8,27,<br>29,30,31  | 5 | P00731,P06760,P62804,Q06000,Q62975                      |
| 3483 | 1,3,4,6,25,<br>26,29,30 | 2,5,7,8,27,<br>28,31,32  | 1 | P02783                                                  |
| 3484 | 1,3,4,6,25,<br>26,29,31 | 2,5,7,8,27,<br>28,30,32  | 4 | P02783,P25809,P29315,P70549                             |
| 3485 | 1,3,4,6,25,<br>26,29,32 | 2,5,7,8,27,<br>28,30,31  | 1 | P02783                                                  |
| 3486 | 1,3,4,6,25,<br>26,30,31 | 2,5,7,8,27,<br>28,29,32  | 8 | P06760,P25809,P29315,P54921,P62804,Q00715,Q4G075,Q812E4 |
| 3487 | 1,3,4,6,25,<br>26,30,32 | 2,5,7,8,27,<br>28,29,31  | 7 | P06760,P25809,P62804,Q00715,Q06000,Q4G075,Q5PQL7        |
| 3488 | 1,3,4,6,25,<br>26,31,32 | 2,5,7,8,27,<br>28,29,30  | 6 | P06760,P25809,P29315,P62804,Q00715,Q4G075               |
| 3489 | 1,3,4,6,25,<br>27,28,29 | 2,5,7,8,26,<br>30,31,32  | 1 | P09656                                                  |
| 3490 | 1,3,4,6,25,<br>27,28,30 | 2,5,7,8,26,<br>29,31,32  | 1 | P06760                                                  |
| 3491 | 1,3,4,6,25,<br>27,28,31 | 2,5,7,8,26,<br>29,30,32  | 1 | P29315                                                  |

|      |                                              |                                                                                 |
|------|----------------------------------------------|---------------------------------------------------------------------------------|
| 3492 | 1,3,4,6,25, 2,5,7,8,26,<br>27,28,32 29,30,31 | 3 P06760,Q62761;Q62762;Q62763,Q9QX74                                            |
| 3493 | 1,3,4,6,25, 2,5,7,8,26,<br>27,29,30 28,31,32 | 3 P02783,P09656,Q6IG02                                                          |
| 3494 | 1,3,4,6,25, 2,5,7,8,26,<br>27,29,31 28,30,32 | 2 P02783,P29315                                                                 |
| 3495 | 1,3,4,6,25, 2,5,7,8,26,<br>27,29,32 28,30,31 | 2 P02783,P09656                                                                 |
| 3496 | 1,3,4,6,25, 2,5,7,8,26,<br>27,30,31 28,29,32 | 5 P06760,P29315,P54921,P62804,Q9QYP1                                            |
| 3497 | 1,3,4,6,25, 2,5,7,8,26,<br>27,30,32 28,29,31 | 5 P06760,P62804,Q6P6R2,Q9QX74,Q9WTT6                                            |
| 3498 | 1,3,4,6,25, 2,5,7,8,26,<br>27,31,32 28,29,30 | 7 P01681,P06760,P29315,P62804,Q9QX74,Q9QYP1,Q9WTT6                              |
| 3499 | 1,3,4,6,25, 2,5,7,8,26,<br>28,29,30 27,31,32 | 0                                                                               |
| 3500 | 1,3,4,6,25, 2,5,7,8,26,<br>28,29,31 27,30,32 | 2 P29315,P70549                                                                 |
| 3501 | 1,3,4,6,25, 2,5,7,8,26,<br>28,29,32 27,30,31 | 0                                                                               |
| 3502 | 1,3,4,6,25, 2,5,7,8,26,<br>28,30,31 27,29,32 | 5 P06760,P25809,P29315,Q62975,Q9JJ50                                            |
| 3503 | 1,3,4,6,25, 2,5,7,8,26,<br>28,30,32 27,29,31 | 7 P06760,P25809,Q4G075,Q5PQL7,Q62975,Q9QX74,Q9WTT6                              |
| 3504 | 1,3,4,6,25, 2,5,7,8,26,<br>28,31,32 27,29,30 | 9 P06760,P22006,P25809,P29315,P62804,Q4G075,Q62975,Q9QX74,Q9WTT6                |
| 3505 | 1,3,4,6,25, 2,5,7,8,26,<br>29,30,31 27,28,32 | 5 P07150,P25809,Q6IG02,Q9QWN8,Q9WTT6                                            |
| 3506 | 1,3,4,6,25, 2,5,7,8,26,<br>29,30,32 27,28,31 | 3 P07150,P25809,Q9WTT6                                                          |
| 3507 | 1,3,4,6,25, 2,5,7,8,26,<br>29,31,32 27,28,30 | 4 P07150,P25809,P62804,Q9WTT6                                                   |
| 3508 | 1,3,4,6,25, 2,5,7,8,26,<br>30,31,32 27,28,29 | 11 P01681,P06760,P25809,P47967,P62804,P97584,Q00715,Q4G075,Q6P6R2,Q9QX74,Q9WTT6 |
| 3509 | 1,3,4,6,26, 2,5,7,8,25,<br>27,28,29 30,31,32 | 3 P02783,P09656,P70549                                                          |
| 3510 | 1,3,4,6,26, 2,5,7,8,25,<br>27,28,30 29,31,32 | 3 P09656,P21588,Q8VD89                                                          |
| 3511 | 1,3,4,6,26, 2,5,7,8,25,<br>27,28,31 29,30,32 | 1 P62804                                                                        |

|      |                                              |                                                                  |
|------|----------------------------------------------|------------------------------------------------------------------|
| 3512 | 1,3,4,6,26, 2,5,7,8,25,<br>27,28,32 29,30,31 | 2 P09656,P62804                                                  |
| 3513 | 1,3,4,6,26, 2,5,7,8,25,<br>27,29,30 28,31,32 | 5 P02783,P09656,P21588,Q6IG02,Q811M5                             |
| 3514 | 1,3,4,6,26, 2,5,7,8,25,<br>27,29,31 28,30,32 | 2 P02783,P70549                                                  |
| 3515 | 1,3,4,6,26, 2,5,7,8,25,<br>27,29,32 28,30,31 | 2 P02783,P09656                                                  |
| 3516 | 1,3,4,6,26, 2,5,7,8,25,<br>27,30,31 28,29,32 | 4 P02783,P06760,P54921,P62804                                    |
| 3517 | 1,3,4,6,26, 2,5,7,8,25,<br>27,30,32 28,29,31 | 4 P02783,P06760,P62804,Q8VD89                                    |
| 3518 | 1,3,4,6,26, 2,5,7,8,25,<br>27,31,32 28,29,30 | 4 P02783,P06760,P22006,P62804                                    |
| 3519 | 1,3,4,6,26, 2,5,7,8,25,<br>28,29,30 27,31,32 | 2 P02783,P09656                                                  |
| 3520 | 1,3,4,6,26, 2,5,7,8,25,<br>28,29,31 27,30,32 | 2 P02783,P70549                                                  |
| 3521 | 1,3,4,6,26, 2,5,7,8,25,<br>28,29,32 27,30,31 | 2 P02783,P09656                                                  |
| 3522 | 1,3,4,6,26, 2,5,7,8,25,<br>28,30,31 27,29,32 | 3 P06760,P25809,Q4G075                                           |
| 3523 | 1,3,4,6,26, 2,5,7,8,25,<br>28,30,32 27,29,31 | 4 P06760,P62804,Q4G075,Q8VD89                                    |
| 3524 | 1,3,4,6,26, 2,5,7,8,25,<br>28,31,32 27,29,30 | 7 O54728,P00731,P06760,P22006,P25809,P62804,Q4G075               |
| 3525 | 1,3,4,6,26, 2,5,7,8,25,<br>29,30,31 27,28,32 | 2 P02783,P25809                                                  |
| 3526 | 1,3,4,6,26, 2,5,7,8,25,<br>29,30,32 27,28,31 | 1 P02783                                                         |
| 3527 | 1,3,4,6,26, 2,5,7,8,25,<br>29,31,32 27,28,30 | 3 P02783,P62804,P70549                                           |
| 3528 | 1,3,4,6,26, 2,5,7,8,25,<br>30,31,32 27,28,29 | 9 P02783,P06760,P22006,P25809,P62804,Q00715,Q4G075,Q8VD89,Q9WTT6 |
| 3529 | 1,3,4,6,27, 2,5,7,8,25,<br>28,29,30 26,31,32 | 3 P02783,P09656,Q6IG02                                           |
| 3530 | 1,3,4,6,27, 2,5,7,8,25,<br>28,29,31 26,30,32 | 1 P02783                                                         |
| 3531 | 1,3,4,6,27, 2,5,7,8,25,<br>28,29,32 26,30,31 | 5 O35547,P02783,P09656,Q62761;Q62762;Q62763,Q6AYR9               |

|      |                                              |                                                                  |
|------|----------------------------------------------|------------------------------------------------------------------|
| 3532 | 1,3,4,6,27, 2,5,7,8,25,<br>28,30,31 26,29,32 | 2 P06760,Q8VD89                                                  |
| 3533 | 1,3,4,6,27, 2,5,7,8,25,<br>28,30,32 26,29,31 | 4 P06760,P09656,Q8VD89,Q9QX74                                    |
| 3534 | 1,3,4,6,27, 2,5,7,8,25,<br>28,31,32 26,29,30 | 4 P06760,P22006,P62804,Q9QX74                                    |
| 3535 | 1,3,4,6,27, 2,5,7,8,25,<br>29,30,31 26,28,32 | 2 P02783,Q6IG02                                                  |
| 3536 | 1,3,4,6,27, 2,5,7,8,25,<br>29,30,32 26,28,31 | 5 P02783,P09656,Q6IG02,Q9WTT6,Q9Z0V6                             |
| 3537 | 1,3,4,6,27, 2,5,7,8,25,<br>29,31,32 26,28,30 | 2 P02783,P62804                                                  |
| 3538 | 1,3,4,6,27, 2,5,7,8,25,<br>30,31,32 26,28,29 | 9 P02783,P06760,P22006,P62804,Q6P6R2,Q8VD89,Q9QX74,Q9QYP1,Q9WTT6 |
| 3539 | 1,3,4,6,28, 2,5,7,8,25,<br>29,30,31 26,27,32 | 0                                                                |
| 3540 | 1,3,4,6,28, 2,5,7,8,25,<br>29,30,32 26,27,31 | 2 Q9WTT6,Q9Z0V6                                                  |
| 3541 | 1,3,4,6,28, 2,5,7,8,25,<br>29,31,32 26,27,30 | 1 P22006                                                         |
| 3542 | 1,3,4,6,28, 2,5,7,8,25,<br>30,31,32 26,27,29 | 8 P06760,P22006,P25809,P62804,Q4G075,Q8VD89,Q9QX74,Q9WTT6        |
| 3543 | 1,3,4,6,29, 2,5,7,8,25,<br>30,31,32 26,27,28 | 6 P02783,P07150,P25809,P26342,P36860,Q9WTT6                      |
| 3544 | 1,3,4,7,8,2 2,5,6,28,2<br>5,26,27 9,30,31,32 | 2 O70417,P36860                                                  |
| 3545 | 1,3,4,7,8,2 2,5,6,27,2<br>5,26,28 9,30,31,32 | 4 O70417,P01039,P36860,Q5I0J9                                    |
| 3546 | 1,3,4,7,8,2 2,5,6,27,2<br>5,26,29 8,30,31,32 | 5 P01039,P22006,P49134,Q5I0J9,Q9QX74                             |
| 3547 | 1,3,4,7,8,2 2,5,6,27,2<br>5,26,30 8,29,31,32 | 4 O70417,P49134,Q05511,Q6IFW6                                    |
| 3548 | 1,3,4,7,8,2 2,5,6,27,2<br>5,26,31 8,29,30,32 | 3 P01681,P29315,Q5I0J9                                           |
| 3549 | 1,3,4,7,8,2 2,5,6,27,2<br>5,26,32 8,29,30,31 | 2 O70417,P01681                                                  |
| 3550 | 1,3,4,7,8,2 2,5,6,26,2<br>5,27,28 9,30,31,32 | 4 O70417,P01681,P22282,P36860                                    |
| 3551 | 1,3,4,7,8,2 2,5,6,26,2<br>5,27,29 8,30,31,32 | 3 O70417,P10758,Q4G075                                           |

|      |                        |                          |    |                                                                                     |
|------|------------------------|--------------------------|----|-------------------------------------------------------------------------------------|
| 3552 | 1,3,4,7,8,2<br>5,27,30 | 2,5,6,26,2<br>8,29,31,32 | 8  | O70417,P01681,Q05511,Q4FZU2,Q6IFW6,Q6IG02,Q6IMF3,Q6P6Q2                             |
| 3553 | 1,3,4,7,8,2<br>5,27,31 | 2,5,6,26,2<br>8,29,30,32 | 4  | O70417,P01681,P29315,Q68G31                                                         |
| 3554 | 1,3,4,7,8,2<br>5,27,32 | 2,5,6,26,2<br>8,29,30,31 | 4  | O70417,P00762,P01681,Q01984                                                         |
| 3555 | 1,3,4,7,8,2<br>5,28,29 | 2,5,6,26,2<br>7,30,31,32 | 4  | O70417,P01039,P36860,Q9QW07                                                         |
| 3556 | 1,3,4,7,8,2<br>5,28,30 | 2,5,6,26,2<br>7,29,31,32 | 3  | O70417,P01039,Q6IFW6                                                                |
| 3557 | 1,3,4,7,8,2<br>5,28,31 | 2,5,6,26,2<br>7,29,30,32 | 8  | O70417,P01039,P01681,P29315,Q5I0J9,Q811M5,Q923V8,Q9JJ50                             |
| 3558 | 1,3,4,7,8,2<br>5,28,32 | 2,5,6,26,2<br>7,29,30,31 | 5  | O70417,P01039,P01681,P36860,Q811M5                                                  |
| 3559 | 1,3,4,7,8,2<br>5,29,30 | 2,5,6,26,2<br>7,28,31,32 | 7  | O70417,P01039,Q4FZU2,Q6IFW6,Q6IG02,Q6IMF3,Q6P6Q2                                    |
| 3560 | 1,3,4,7,8,2<br>5,29,31 | 2,5,6,26,2<br>7,28,30,32 | 3  | P01039,P01681,Q5I0J9                                                                |
| 3561 | 1,3,4,7,8,2<br>5,29,32 | 2,5,6,26,2<br>7,28,30,31 | 2  | P01039,P01681                                                                       |
| 3562 | 1,3,4,7,8,2<br>5,30,31 | 2,5,6,26,2<br>7,28,29,32 | 6  | O70417,P01681,Q05511,Q4FZU2,Q6IFW6,Q6IG02                                           |
| 3563 | 1,3,4,7,8,2<br>5,30,32 | 2,5,6,26,2<br>7,28,29,31 | 7  | O70417,P01681,P02625,P35280,Q05511,Q4FZU2,Q6IFW6                                    |
| 3564 | 1,3,4,7,8,2<br>5,31,32 | 2,5,6,26,2<br>7,28,29,30 | 3  | P01681,P21588,Q811M5                                                                |
| 3565 | 1,3,4,7,8,2<br>6,27,28 | 2,5,6,25,2<br>9,30,31,32 | 8  | D3ZUC6,O70417,P07150,P22282,P36860,P47967,P97840,Q9WTT6                             |
| 3566 | 1,3,4,7,8,2<br>6,27,29 | 2,5,6,25,2<br>8,30,31,32 | 3  | Q4G075,Q9QX74,Q9WTT6                                                                |
| 3567 | 1,3,4,7,8,2<br>6,27,30 | 2,5,6,25,2<br>8,29,31,32 | 4  | O70417,Q6IFW6,Q6IG02,Q6P6Q2                                                         |
| 3568 | 1,3,4,7,8,2<br>6,27,31 | 2,5,6,25,2<br>8,29,30,32 | 1  | Q68G31                                                                              |
| 3569 | 1,3,4,7,8,2<br>6,27,32 | 2,5,6,25,2<br>8,29,30,31 | 0  |                                                                                     |
| 3570 | 1,3,4,7,8,2<br>6,28,29 | 2,5,6,25,2<br>7,30,31,32 | 12 | D3ZUC6,P01039,P20646,P21674,P47967,P49134,P97840,Q63424,Q64093,Q6P6R2,Q9QX74,Q9WTT6 |
| 3571 | 1,3,4,7,8,2<br>6,28,30 | 2,5,6,25,2<br>7,29,31,32 | 3  | O70417,P01039,P97840                                                                |

|      |                        |                          |                                                                                        |
|------|------------------------|--------------------------|----------------------------------------------------------------------------------------|
| 3572 | 1,3,4,7,8,2<br>6,28,31 | 2,5,6,25,2<br>7,29,30,32 | 1 Q811M5                                                                               |
| 3573 | 1,3,4,7,8,2<br>6,28,32 | 2,5,6,25,2<br>7,29,30,31 | 2 O54728,P01039                                                                        |
| 3574 | 1,3,4,7,8,2<br>6,29,30 | 2,5,6,25,2<br>7,28,31,32 | 4 P01039,P49134,Q6IFW6,Q6IG02                                                          |
| 3575 | 1,3,4,7,8,2<br>6,29,31 | 2,5,6,25,2<br>7,28,30,32 | 5 P49134,P70549,Q63424,Q64093,Q9QX74                                                   |
| 3576 | 1,3,4,7,8,2<br>6,29,32 | 2,5,6,25,2<br>7,28,30,31 | 1 P01039                                                                               |
| 3577 | 1,3,4,7,8,2<br>6,30,31 | 2,5,6,25,2<br>7,28,29,32 | 2 P49134,Q6IFW6                                                                        |
| 3578 | 1,3,4,7,8,2<br>6,30,32 | 2,5,6,25,2<br>7,28,29,31 | 2 O70417,P35280                                                                        |
| 3579 | 1,3,4,7,8,2<br>6,31,32 | 2,5,6,25,2<br>7,28,29,30 | 2 O54728,P01681                                                                        |
| 3580 | 1,3,4,7,8,2<br>7,28,29 | 2,5,6,25,2<br>6,30,31,32 | 12 D3ZUC6,P00507,P21674,P22282,P47967,P97840,Q4G075,Q63493,Q63617,Q812E4,Q9EQS0,Q9Z2L0 |
| 3581 | 1,3,4,7,8,2<br>7,28,30 | 2,5,6,25,2<br>6,29,31,32 | 6 O70417,P19218,P97840,Q6IFW6,Q6IG02,Q6P6Q2                                            |
| 3582 | 1,3,4,7,8,2<br>7,28,31 | 2,5,6,25,2<br>6,29,30,32 | 2 D3ZUC6,Q68G31                                                                        |
| 3583 | 1,3,4,7,8,2<br>7,28,32 | 2,5,6,25,2<br>6,29,30,31 | 7 O70417,P08723,P22282,P97840,Q62902,Q6AYR9,Q812E4                                     |
| 3584 | 1,3,4,7,8,2<br>7,29,30 | 2,5,6,25,2<br>6,28,31,32 | 9 O70417,Q4FZU2,Q4G075,Q6IFU7,Q6IFU8,Q6IFW6,Q6IG02,Q6IMF3,Q6P6Q2                       |
| 3585 | 1,3,4,7,8,2<br>7,29,31 | 2,5,6,25,2<br>6,28,30,32 | 2 Q4G075,Q68G31                                                                        |
| 3586 | 1,3,4,7,8,2<br>7,29,32 | 2,5,6,25,2<br>6,28,30,31 | 0                                                                                      |
| 3587 | 1,3,4,7,8,2<br>7,30,31 | 2,5,6,25,2<br>6,28,29,32 | 6 O70417,Q4FZU2,Q6IFW6,Q6IG02,Q6IMF3,Q6P6Q2                                            |
| 3588 | 1,3,4,7,8,2<br>7,30,32 | 2,5,6,25,2<br>6,28,29,31 | 7 O70417,P01681,P35280,Q4FZU2,Q6IFW6,Q6IG02,Q6P6Q2                                     |
| 3589 | 1,3,4,7,8,2<br>7,31,32 | 2,5,6,25,2<br>6,28,29,30 | 1 P01681                                                                               |
| 3590 | 1,3,4,7,8,2<br>8,29,30 | 2,5,6,25,2<br>6,27,31,32 | 6 O70417,P01039,P21674,P97840,Q6IFW6,Q6IG02                                            |
| 3591 | 1,3,4,7,8,2<br>8,29,31 | 2,5,6,25,2<br>6,27,30,32 | 6 D3ZUC6,P01039,P21674,P82471,Q63493,Q811M5                                            |



|      |                         |                          |   |                                                         |
|------|-------------------------|--------------------------|---|---------------------------------------------------------|
| 3592 | 1,3,4,7,8,2<br>8,29,32  | 2,5,6,25,2<br>6,27,30,31 | 8 | P01039,P08723,P21674,P30120,P97840,Q63493,Q812E4,Q9Z2L0 |
| 3593 | 1,3,4,7,8,2<br>8,30,31  | 2,5,6,25,2<br>6,27,29,32 | 3 | O70417,P82471,Q9JJ50                                    |
| 3594 | 1,3,4,7,8,2<br>8,30,32  | 2,5,6,25,2<br>6,27,29,31 | 2 | O70417,P35280                                           |
| 3595 | 1,3,4,7,8,2<br>8,31,32  | 2,5,6,25,2<br>6,27,29,30 | 4 | P01681,P82471,Q811M5,Q923V8                             |
| 3596 | 1,3,4,7,8,2<br>9,30,31  | 2,5,6,25,2<br>6,27,28,32 | 7 | P82471,Q4FZU2,Q6IFW6,Q6IG02,Q6IMF3,Q6P6Q2,Q9QWN8        |
| 3597 | 1,3,4,7,8,2<br>9,30,32  | 2,5,6,25,2<br>6,27,28,31 | 7 | B0BNN3,P35280,Q4FZU2,Q6IFW6,Q6IG02,Q6IMF3,Q6P6Q2        |
| 3598 | 1,3,4,7,8,2<br>9,31,32  | 2,5,6,25,2<br>6,27,28,30 | 2 | P01681,P82471                                           |
| 3599 | 1,3,4,7,8,3<br>0,31,32  | 2,5,6,25,2<br>6,27,28,29 | 5 | P01681,P02625,P35280,P82471,Q6IFW6                      |
| 3600 | 1,3,4,7,25,<br>26,27,28 | 2,5,6,8,29,<br>30,31,32  | 2 | P20646,P36860                                           |
| 3601 | 1,3,4,7,25,<br>26,27,29 | 2,5,6,8,28,<br>30,31,32  | 2 | O89117,P10758                                           |
| 3602 | 1,3,4,7,25,<br>26,27,30 | 2,5,6,8,28,<br>29,31,32  | 0 |                                                         |
| 3603 | 1,3,4,7,25,<br>26,27,31 | 2,5,6,8,28,<br>29,30,32  | 4 | P29315,Q5I0J9,Q68G31,Q9QYP1                             |
| 3604 | 1,3,4,7,25,<br>26,27,32 | 2,5,6,8,28,<br>29,30,31  | 0 |                                                         |
| 3605 | 1,3,4,7,25,<br>26,28,29 | 2,5,6,8,27,<br>30,31,32  | 4 | P01039,P20646,P97840,Q5I0J9                             |
| 3606 | 1,3,4,7,25,<br>26,28,30 | 2,5,6,8,27,<br>29,31,32  | 1 | Q62975                                                  |
| 3607 | 1,3,4,7,25,<br>26,28,31 | 2,5,6,8,27,<br>29,30,32  | 3 | P29315,Q5I0J9,Q64268                                    |
| 3608 | 1,3,4,7,25,<br>26,28,32 | 2,5,6,8,27,<br>29,30,31  | 2 | P00731,Q62975                                           |
| 3609 | 1,3,4,7,25,<br>26,29,30 | 2,5,6,8,27,<br>28,31,32  | 0 |                                                         |
| 3610 | 1,3,4,7,25,<br>26,29,31 | 2,5,6,8,27,<br>28,30,32  | 3 | P29315,P70549,Q5I0J9                                    |
| 3611 | 1,3,4,7,25,<br>26,29,32 | 2,5,6,8,27,<br>28,30,31  | 0 |                                                         |

|      |                                              |                                                    |
|------|----------------------------------------------|----------------------------------------------------|
| 3612 | 1,3,4,7,25, 2,5,6,8,27,<br>26,30,31 28,29,32 | 2 P25809,P29315                                    |
| 3613 | 1,3,4,7,25, 2,5,6,8,27,<br>26,30,32 28,29,31 | 2 P25809,Q62975                                    |
| 3614 | 1,3,4,7,25, 2,5,6,8,27,<br>26,31,32 28,29,30 | 5 P01681,P25809,P29315,P51792;P51794;P51796,Q5I0J9 |
| 3615 | 1,3,4,7,25, 2,5,6,8,26,<br>27,28,29 30,31,32 | 5 O89117,P10758,P97840,Q99MH3,Q9Z2L0               |
| 3616 | 1,3,4,7,25, 2,5,6,8,26,<br>27,28,30 29,31,32 | 0                                                  |
| 3617 | 1,3,4,7,25, 2,5,6,8,26,<br>27,28,31 29,30,32 | 2 P29315,Q68G31                                    |
| 3618 | 1,3,4,7,25, 2,5,6,8,26,<br>27,28,32 29,30,31 | 3 P01681,Q5RJR2,Q62761;Q62762;Q62763               |
| 3619 | 1,3,4,7,25, 2,5,6,8,26,<br>27,29,30 28,31,32 | 2 Q6IFW6,Q6IG02                                    |
| 3620 | 1,3,4,7,25, 2,5,6,8,26,<br>27,29,31 28,30,32 | 2 P10758,Q68G31                                    |
| 3621 | 1,3,4,7,25, 2,5,6,8,26,<br>27,29,32 28,30,31 | 1 P10758                                           |
| 3622 | 1,3,4,7,25, 2,5,6,8,26,<br>27,30,31 28,29,32 | 2 Q6IG02,Q9QYP1                                    |
| 3623 | 1,3,4,7,25, 2,5,6,8,26,<br>27,30,32 28,29,31 | 2 P00762,P01681                                    |
| 3624 | 1,3,4,7,25, 2,5,6,8,26,<br>27,31,32 28,29,30 | 2 P01681,Q9QYP1                                    |
| 3625 | 1,3,4,7,25, 2,5,6,8,26,<br>28,29,30 27,31,32 | 1 P01039                                           |
| 3626 | 1,3,4,7,25, 2,5,6,8,26,<br>28,29,31 27,30,32 | 3 P01039,Q5I0J9,Q9JJ50                             |
| 3627 | 1,3,4,7,25, 2,5,6,8,26,<br>28,29,32 27,30,31 | 1 P01039                                           |
| 3628 | 1,3,4,7,25, 2,5,6,8,26,<br>28,30,31 27,29,32 | 3 P25809,Q62975,Q9JJ50                             |
| 3629 | 1,3,4,7,25, 2,5,6,8,26,<br>28,30,32 27,29,31 | 2 P25809,Q62975                                    |
| 3630 | 1,3,4,7,25, 2,5,6,8,26,<br>28,31,32 27,29,30 | 5 P01681,P25809,Q62975,Q811M5,Q9JJ50               |
| 3631 | 1,3,4,7,25, 2,5,6,8,26,<br>29,30,31 27,28,32 | 3 P25809,Q6IG02,Q9QWN8                             |

|      |                                              |                                             |
|------|----------------------------------------------|---------------------------------------------|
| 3632 | 1,3,4,7,25, 2,5,6,8,26,<br>29,30,32 27,28,31 | 0                                           |
| 3633 | 1,3,4,7,25, 2,5,6,8,26,<br>29,31,32 27,28,30 | 1 P01681                                    |
| 3634 | 1,3,4,7,25, 2,5,6,8,26,<br>30,31,32 27,28,29 | 6 P01681,P25809,P26342,Q00715,Q6P6R2,Q9QYP1 |
| 3635 | 1,3,4,7,26, 2,5,6,8,25,<br>27,28,29 30,31,32 | 5 O54858,P10758,P20646,P47967,P97840        |
| 3636 | 1,3,4,7,26, 2,5,6,8,25,<br>27,28,30 29,31,32 | 1 P97840                                    |
| 3637 | 1,3,4,7,26, 2,5,6,8,25,<br>27,28,31 29,30,32 | 1 Q68G31                                    |
| 3638 | 1,3,4,7,26, 2,5,6,8,25,<br>27,28,32 29,30,31 | 2 P97840,Q62761;Q62762;Q62763               |
| 3639 | 1,3,4,7,26, 2,5,6,8,25,<br>27,29,30 28,31,32 | 2 P97840,Q6IG02                             |
| 3640 | 1,3,4,7,26, 2,5,6,8,25,<br>27,29,31 28,30,32 | 2 P10758,Q68G31                             |
| 3641 | 1,3,4,7,26, 2,5,6,8,25,<br>27,29,32 28,30,31 | 1 P10758                                    |
| 3642 | 1,3,4,7,26, 2,5,6,8,25,<br>27,30,31 28,29,32 | 1 Q9QYP1                                    |
| 3643 | 1,3,4,7,26, 2,5,6,8,25,<br>27,30,32 28,29,31 | 0                                           |
| 3644 | 1,3,4,7,26, 2,5,6,8,25,<br>27,31,32 28,29,30 | 0                                           |
| 3645 | 1,3,4,7,26, 2,5,6,8,25,<br>28,29,30 27,31,32 | 2 P01039,P97840                             |
| 3646 | 1,3,4,7,26, 2,5,6,8,25,<br>28,29,31 27,30,32 | 5 P01039,P70549,P97840,Q63424,Q68G31        |
| 3647 | 1,3,4,7,26, 2,5,6,8,25,<br>28,29,32 27,30,31 | 2 P01039,P97840                             |
| 3648 | 1,3,4,7,26, 2,5,6,8,25,<br>28,30,31 27,29,32 | 0                                           |
| 3649 | 1,3,4,7,26, 2,5,6,8,25,<br>28,30,32 27,29,31 | 1 P97840                                    |
| 3650 | 1,3,4,7,26, 2,5,6,8,25,<br>28,31,32 27,29,30 | 1 O54728                                    |
| 3651 | 1,3,4,7,26, 2,5,6,8,25,<br>29,30,31 27,28,32 | 1 Q9QWN8                                    |

|      |                                              |                                                                                |
|------|----------------------------------------------|--------------------------------------------------------------------------------|
| 3652 | 1,3,4,7,26, 2,5,6,8,25,<br>29,30,32 27,28,31 | 0                                                                              |
| 3653 | 1,3,4,7,26, 2,5,6,8,25,<br>29,31,32 27,28,30 | 0                                                                              |
| 3654 | 1,3,4,7,26, 2,5,6,8,25,<br>30,31,32 27,28,29 | 2 P25809,Q00715                                                                |
| 3655 | 1,3,4,7,27, 2,5,6,8,25,<br>28,29,30 26,31,32 | 5 O54858,P00507,P47967,P97840,Q6IG02                                           |
| 3656 | 1,3,4,7,27, 2,5,6,8,25,<br>28,29,31 26,30,32 | 5 P00507,P10758,P97840,Q68G31,Q99MH3                                           |
| 3657 | 1,3,4,7,27, 2,5,6,8,25,<br>28,29,32 26,30,31 | 9 O54858,P10758,P47967,P97840,Q62761;Q62762;Q62763,Q6AYR9,Q812E4,Q8CGS4,Q9Z2L0 |
| 3658 | 1,3,4,7,27, 2,5,6,8,25,<br>28,30,31 26,29,32 | 0                                                                              |
| 3659 | 1,3,4,7,27, 2,5,6,8,25,<br>28,30,32 26,29,31 | 1 P97840                                                                       |
| 3660 | 1,3,4,7,27, 2,5,6,8,25,<br>28,31,32 26,29,30 | 1 Q62761;Q62762;Q62763                                                         |
| 3661 | 1,3,4,7,27, 2,5,6,8,25,<br>29,30,31 26,28,32 | 2 P08649,Q6IG02                                                                |
| 3662 | 1,3,4,7,27, 2,5,6,8,25,<br>29,30,32 26,28,31 | 2 B0BNN3,Q6IG02                                                                |
| 3663 | 1,3,4,7,27, 2,5,6,8,25,<br>29,31,32 26,28,30 | 3 B0BNN3,P10758,P80299                                                         |
| 3664 | 1,3,4,7,27, 2,5,6,8,25,<br>30,31,32 26,28,29 | 2 P08649,Q9QYP1                                                                |
| 3665 | 1,3,4,7,28, 2,5,6,8,25,<br>29,30,31 26,27,32 | 2 P97840,Q9JJ50                                                                |
| 3666 | 1,3,4,7,28, 2,5,6,8,25,<br>29,30,32 26,27,31 | 3 P01039,P17559,P97840                                                         |
| 3667 | 1,3,4,7,28, 2,5,6,8,25,<br>29,31,32 26,27,30 | 1 P17559                                                                       |
| 3668 | 1,3,4,7,28, 2,5,6,8,25,<br>30,31,32 26,27,29 | 2 P25809,Q9JJ50                                                                |
| 3669 | 1,3,4,7,29, 2,5,6,8,25,<br>30,31,32 26,27,28 | 5 B0BNN3,P08649,P17559,P25809,P26342                                           |
| 3670 | 1,3,4,8,25, 2,5,6,7,29,<br>26,27,28 30,31,32 | 3 P01835,P26342,P36860                                                         |
| 3671 | 1,3,4,8,25, 2,5,6,7,28,<br>26,27,29 30,31,32 | 0                                                                              |

|      |                                              |                                                           |
|------|----------------------------------------------|-----------------------------------------------------------|
| 3672 | 1,3,4,8,25, 2,5,6,7,28,<br>26,27,30 29,31,32 | 5 O70417,P01835,Q05511,Q6IFW6,Q6IG02                      |
| 3673 | 1,3,4,8,25, 2,5,6,7,28,<br>26,27,31 29,30,32 | 4 P01681,P01835,P29315,P54921                             |
| 3674 | 1,3,4,8,25, 2,5,6,7,28,<br>26,27,32 29,30,31 | 3 P00762,P01681,P01835                                    |
| 3675 | 1,3,4,8,25, 2,5,6,7,27,<br>26,28,29 30,31,32 | 3 P01039,P50116,P70549                                    |
| 3676 | 1,3,4,8,25, 2,5,6,7,27,<br>26,28,30 29,31,32 | 4 O70417,P01039,P50116,P80299                             |
| 3677 | 1,3,4,8,25, 2,5,6,7,27,<br>26,28,31 29,30,32 | 4 P01039,P01835,P29315,P50116                             |
| 3678 | 1,3,4,8,25, 2,5,6,7,27,<br>26,28,32 29,30,31 | 4 O54728,P01039,P01681,P50116                             |
| 3679 | 1,3,4,8,25, 2,5,6,7,27,<br>26,29,30 28,31,32 | 5 O88797,P01039,P50116,Q6IFW6,Q6IG02                      |
| 3680 | 1,3,4,8,25, 2,5,6,7,27,<br>26,29,31 28,30,32 | 4 P01039,P29315,P50116,P70549                             |
| 3681 | 1,3,4,8,25, 2,5,6,7,27,<br>26,29,32 28,30,31 | 3 P01039,P01681,P50116                                    |
| 3682 | 1,3,4,8,25, 2,5,6,7,27,<br>26,30,31 28,29,32 | 5 P29315,P50116,P54921,Q6AY61,Q6IFW6                      |
| 3683 | 1,3,4,8,25, 2,5,6,7,27,<br>26,30,32 28,29,31 | 4 O88797,P00762,P01681,P50116                             |
| 3684 | 1,3,4,8,25, 2,5,6,7,27,<br>26,31,32 28,29,30 | 5 O54728,P00762,P01681,P29315,P50116                      |
| 3685 | 1,3,4,8,25, 2,5,6,7,26,<br>27,28,29 30,31,32 | 2 P36860,Q812E4                                           |
| 3686 | 1,3,4,8,25, 2,5,6,7,26,<br>27,28,30 29,31,32 | 7 O70417,P01835,P36860,Q6IFU7,Q6IFW6,Q6IG02,Q6P6Q2        |
| 3687 | 1,3,4,8,25, 2,5,6,7,26,<br>27,28,31 29,30,32 | 6 D3ZTX0,P01681,P01835,P29315,P36860,Q9R168               |
| 3688 | 1,3,4,8,25, 2,5,6,7,26,<br>27,28,32 29,30,31 | 6 P00762,P01681,P01835,P36860,Q6AYR9,Q9QWN8               |
| 3689 | 1,3,4,8,25, 2,5,6,7,26,<br>27,29,30 28,31,32 | 8 O70417,Q4FZU2,Q6IFU7,Q6IFU8,Q6IFW6,Q6IG02,Q6IMF3,Q6P6Q2 |
| 3690 | 1,3,4,8,25, 2,5,6,7,26,<br>27,29,31 28,30,32 | 3 P01681,P29315,Q9R168                                    |
| 3691 | 1,3,4,8,25, 2,5,6,7,26,<br>27,29,32 28,30,31 | 2 P00762,P01681                                           |

|      |                                              |    |                                                                                         |
|------|----------------------------------------------|----|-----------------------------------------------------------------------------------------|
| 3692 | 1,3,4,8,25, 2,5,6,7,26,<br>27,30,31 28,29,32 | 12 | O70417,P01681,P01835,P29315,P54921,Q05511,Q4FZU2,Q6IFW6,Q6IG02,Q6IMF3,Q6P6Q2,Q9<br>QYP1 |
| 3693 | 1,3,4,8,25, 2,5,6,7,26,<br>27,30,32 28,29,31 | 11 | O70417,P00762,P01681,P01835,P02625,Q05511,Q4FZU2,Q6IFU7,Q6IFW6,Q6IG02,Q6P6Q2            |
| 3694 | 1,3,4,8,25, 2,5,6,7,26,<br>27,31,32 28,29,30 | 5  | P00762,P01681,P01835,P29315,Q9QYP1                                                      |
| 3695 | 1,3,4,8,25, 2,5,6,7,26,<br>28,29,30 27,31,32 | 4  | P01039,P50116,Q6IFW6,Q6IG02                                                             |
| 3696 | 1,3,4,8,25, 2,5,6,7,26,<br>28,29,31 27,30,32 | 5  | D3ZTX0,P01039,P29315,P50116,Q9JJ50                                                      |
| 3697 | 1,3,4,8,25, 2,5,6,7,26,<br>28,29,32 27,30,31 | 3  | P01039,P01681,P50116                                                                    |
| 3698 | 1,3,4,8,25, 2,5,6,7,26,<br>28,30,31 27,29,32 | 6  | P01039,P01681,P29315,P50116,Q6IFW6,Q9JJ50                                               |
| 3699 | 1,3,4,8,25, 2,5,6,7,26,<br>28,30,32 27,29,31 | 5  | O70417,O88797,P01039,P01681,P50116                                                      |
| 3700 | 1,3,4,8,25, 2,5,6,7,26,<br>28,31,32 27,29,30 | 8  | P01039,P01681,P21588,P29315,P50116,Q811M5,Q923V8,Q9JJ50                                 |
| 3701 | 1,3,4,8,25, 2,5,6,7,26,<br>29,30,31 27,28,32 | 6  | P01039,P50116,Q4FZU2,Q6IFW6,Q6IG02,Q6IMF3                                               |
| 3702 | 1,3,4,8,25, 2,5,6,7,26,<br>29,30,32 27,28,31 | 8  | O88797,P00762,P01039,P01681,P50116,Q4FZU2,Q6IFW6,Q6IG02                                 |
| 3703 | 1,3,4,8,25, 2,5,6,7,26,<br>29,31,32 27,28,30 | 4  | P01039,P01681,P21588,P50116                                                             |
| 3704 | 1,3,4,8,25, 2,5,6,7,26,<br>30,31,32 27,28,29 | 8  | O88797,P00762,P01681,P02625,P50116,Q00715,Q4FZU2,Q6IFW6                                 |
| 3705 | 1,3,4,8,26, 2,5,6,7,25,<br>27,28,29 30,31,32 | 2  | P26342,Q6P6R2                                                                           |
| 3706 | 1,3,4,8,26, 2,5,6,7,25,<br>27,28,30 29,31,32 | 1  | Q6IG02                                                                                  |
| 3707 | 1,3,4,8,26, 2,5,6,7,25,<br>27,28,31 29,30,32 | 1  | Q9R168                                                                                  |
| 3708 | 1,3,4,8,26, 2,5,6,7,25,<br>27,28,32 29,30,31 | 3  | O54728,Q6AYR9,Q9QWN8                                                                    |
| 3709 | 1,3,4,8,26, 2,5,6,7,25,<br>27,29,30 28,31,32 | 4  | Q6IFU7,Q6IFW6,Q6IG02,Q6P6Q2                                                             |
| 3710 | 1,3,4,8,26, 2,5,6,7,25,<br>27,29,31 28,30,32 | 1  | Q9R168                                                                                  |
| 3711 | 1,3,4,8,26, 2,5,6,7,25,<br>27,29,32 28,30,31 | 1  | P00762                                                                                  |

|      |                                              |                                             |
|------|----------------------------------------------|---------------------------------------------|
| 3712 | 1,3,4,8,26, 2,5,6,7,25,<br>27,30,31 28,29,32 | 3 Q6AY61,Q6IFW6,Q6IG02                      |
| 3713 | 1,3,4,8,26, 2,5,6,7,25,<br>27,30,32 28,29,31 | 2 P00762,Q6IG02                             |
| 3714 | 1,3,4,8,26, 2,5,6,7,25,<br>27,31,32 28,29,30 | 2 O54728,P00762                             |
| 3715 | 1,3,4,8,26, 2,5,6,7,25,<br>28,29,30 27,31,32 | 3 P01039,P50116,Q6IG02                      |
| 3716 | 1,3,4,8,26, 2,5,6,7,25,<br>28,29,31 27,30,32 | 3 P01039,P50116,P70549                      |
| 3717 | 1,3,4,8,26, 2,5,6,7,25,<br>28,29,32 27,30,31 | 3 O54728,P01039,P50116                      |
| 3718 | 1,3,4,8,26, 2,5,6,7,25,<br>28,30,31 27,29,32 | 2 P01039,P50116                             |
| 3719 | 1,3,4,8,26, 2,5,6,7,25,<br>28,30,32 27,29,31 | 3 O54728,P01039,P50116                      |
| 3720 | 1,3,4,8,26, 2,5,6,7,25,<br>28,31,32 27,29,30 | 3 O54728,P01039,P50116                      |
| 3721 | 1,3,4,8,26, 2,5,6,7,25,<br>29,30,31 27,28,32 | 4 P01039,P50116,Q6IFW6,Q6IG02               |
| 3722 | 1,3,4,8,26, 2,5,6,7,25,<br>29,30,32 27,28,31 | 4 O88797,P01039,P50116,Q6IG02               |
| 3723 | 1,3,4,8,26, 2,5,6,7,25,<br>29,31,32 27,28,30 | 3 O54728,P01039,P50116                      |
| 3724 | 1,3,4,8,26, 2,5,6,7,25,<br>30,31,32 27,28,29 | 3 O54728,P50116,Q00715                      |
| 3725 | 1,3,4,8,27, 2,5,6,7,25,<br>28,29,30 26,31,32 | 4 Q6IFU7,Q6IFW6,Q6IG02,Q6P6Q2               |
| 3726 | 1,3,4,8,27, 2,5,6,7,25,<br>28,29,31 26,30,32 | 1 Q9R168                                    |
| 3727 | 1,3,4,8,27, 2,5,6,7,25,<br>28,29,32 26,30,31 | 4 O35547,Q6AYR9,Q812E4,Q9Z2L0               |
| 3728 | 1,3,4,8,27, 2,5,6,7,25,<br>28,30,31 26,29,32 | 2 Q6IFW6,Q6IG02                             |
| 3729 | 1,3,4,8,27, 2,5,6,7,25,<br>28,30,32 26,29,31 | 4 P00762,Q6AYR9,Q6IG02,Q8VD89               |
| 3730 | 1,3,4,8,27, 2,5,6,7,25,<br>28,31,32 26,29,30 | 3 P00762,P01681,Q6AYR9                      |
| 3731 | 1,3,4,8,27, 2,5,6,7,25,<br>29,30,31 26,28,32 | 6 Q4FZU2,Q6IFU7,Q6IFW6,Q6IG02,Q6IMF3,Q6P6Q2 |

|      |                                              |                                                           |
|------|----------------------------------------------|-----------------------------------------------------------|
| 3732 | 1,3,4,8,27, 2,5,6,7,25,<br>29,30,32 26,28,31 | 8 B0BNN3,P00762,Q4FZU2,Q6IFU7,Q6IFW6,Q6IG02,Q6IMF3,Q6P6Q2 |
| 3733 | 1,3,4,8,27, 2,5,6,7,25,<br>29,31,32 26,28,30 | 2 B0BNN3,P00762                                           |
| 3734 | 1,3,4,8,27, 2,5,6,7,25,<br>30,31,32 26,28,29 | 6 P00762,P01681,Q4FZU2,Q6IFW6,Q6IG02,Q6P6Q2               |
| 3735 | 1,3,4,8,28, 2,5,6,7,25,<br>29,30,31 26,27,32 | 5 P01039,P50116,Q6IFW6,Q6IG02,Q9JJ50                      |
| 3736 | 1,3,4,8,28, 2,5,6,7,25,<br>29,30,32 26,27,31 | 4 O88797,P01039,P50116,Q6IG02                             |
| 3737 | 1,3,4,8,28, 2,5,6,7,25,<br>29,31,32 26,27,30 | 3 P01039,P21588,P50116                                    |
| 3738 | 1,3,4,8,28, 2,5,6,7,25,<br>30,31,32 26,27,29 | 2 P50116,Q9JJ50                                           |
| 3739 | 1,3,4,8,29, 2,5,6,7,25,<br>30,31,32 26,27,28 | 6 B0BNN3,P50116,P63081,Q6IFW6,Q6IG02,Q6IMF3               |
| 3740 | 1,3,4,25,2 2,5,6,7,8,3<br>6,27,28,29 0,31,32 | 3 O54858,P10758,P20646                                    |
| 3741 | 1,3,4,25,2 2,5,6,7,8,2<br>6,27,28,30 9,31,32 | 0                                                         |
| 3742 | 1,3,4,25,2 2,5,6,7,8,2<br>6,27,28,31 9,30,32 | 2 P29315,P62804                                           |
| 3743 | 1,3,4,25,2 2,5,6,7,8,2<br>6,27,28,32 9,30,31 | 2 P62804,Q5RJR2                                           |
| 3744 | 1,3,4,25,2 2,5,6,7,8,2<br>6,27,29,30 8,31,32 | 2 O54858,Q6IG02                                           |
| 3745 | 1,3,4,25,2 2,5,6,7,8,2<br>6,27,29,31 8,30,32 | 2 P10758,P29315                                           |
| 3746 | 1,3,4,25,2 2,5,6,7,8,2<br>6,27,29,32 8,30,31 | 3 O54858,P00762,P10758                                    |
| 3747 | 1,3,4,25,2 2,5,6,7,8,2<br>6,27,30,31 8,29,32 | 4 P29315,P54921,P62804,Q9QYP1                             |
| 3748 | 1,3,4,25,2 2,5,6,7,8,2<br>6,27,30,32 8,29,31 | 3 P00762,P06760,P62804                                    |
| 3749 | 1,3,4,25,2 2,5,6,7,8,2<br>6,27,31,32 8,29,30 | 5 P00762,P01681,P29315,P62804,Q9QYP1                      |
| 3750 | 1,3,4,25,2 2,5,6,7,8,2<br>6,28,29,30 7,31,32 | 5 O54858,P01039,P50115,P50116,Q62714                      |
| 3751 | 1,3,4,25,2 2,5,6,7,8,2<br>6,28,29,31 7,30,32 | 8 P01039,P19218,P29315,P50115,P50116,P70549,Q08163,Q5I0J9 |



|      |                                              |                                                                                 |
|------|----------------------------------------------|---------------------------------------------------------------------------------|
| 3752 | 1,3,4,25,2 2,5,6,7,8,2<br>6,28,29,32 7,30,31 | 5 O54858,P00731,P01039,P50115,P50116                                            |
| 3753 | 1,3,4,25,2 2,5,6,7,8,2<br>6,28,30,31 7,29,32 | 9 P25809,P29315,P50115,P50116,P62804,Q00715,Q08163,Q4G075,Q9JJ50                |
| 3754 | 1,3,4,25,2 2,5,6,7,8,2<br>6,28,30,32 7,29,31 | 8 P06760,P25809,P50115,P50116,P62804,Q00715,Q4G075,Q62975                       |
| 3755 | 1,3,4,25,2 2,5,6,7,8,2<br>6,28,31,32 7,29,30 | 11 O54728,P00731,P19218,P25809,P29315,P50115,P50116,P62804,Q00715,Q08163,Q4G075 |
| 3756 | 1,3,4,25,2 2,5,6,7,8,2<br>6,29,30,31 7,28,32 | 4 P25809,P29315,P50115,P50116                                                   |
| 3757 | 1,3,4,25,2 2,5,6,7,8,2<br>6,29,30,32 7,28,31 | 2 P50115,P50116                                                                 |
| 3758 | 1,3,4,25,2 2,5,6,7,8,2<br>6,29,31,32 7,28,30 | 5 P19218,P29315,P50115,P50116,P62804                                            |
| 3759 | 1,3,4,25,2 2,5,6,7,8,2<br>6,30,31,32 7,28,29 | 9 P06760,P25809,P29315,P50115,P50116,P62804,Q00715,Q4G075,Q9QYP1                |
| 3760 | 1,3,4,25,2 2,5,6,7,8,2<br>7,28,29,30 6,31,32 | 4 O54858,P20766,Q62714,Q6IG02                                                   |
| 3761 | 1,3,4,25,2 2,5,6,7,8,2<br>7,28,29,31 6,30,32 | 4 D3ZTX0,O54858,P10758,P29315                                                   |
| 3762 | 1,3,4,25,2 2,5,6,7,8,2<br>7,28,29,32 6,30,31 | 6 O54858,P00758,P10758,P20766,Q62761;Q62762;Q62763,Q8CGS4                       |
| 3763 | 1,3,4,25,2 2,5,6,7,8,2<br>7,28,30,31 6,29,32 | 3 P06760,P29315,Q9QYP1                                                          |
| 3764 | 1,3,4,25,2 2,5,6,7,8,2<br>7,28,30,32 6,29,31 | 3 P00762,P06760,Q9QX74                                                          |
| 3765 | 1,3,4,25,2 2,5,6,7,8,2<br>7,28,31,32 6,29,30 | 6 P00762,P01681,P06760,P29315,P62804,Q9QYP1                                     |
| 3766 | 1,3,4,25,2 2,5,6,7,8,2<br>7,29,30,31 6,28,32 | 3 Q6IFW6,Q6IG02,Q9QYP1                                                          |
| 3767 | 1,3,4,25,2 2,5,6,7,8,2<br>7,29,30,32 6,28,31 | 3 O54858,P00762,Q6IG02                                                          |
| 3768 | 1,3,4,25,2 2,5,6,7,8,2<br>7,29,31,32 6,28,30 | 6 P00762,P01681,P10758,P29315,P62804,Q9QYP1                                     |
| 3769 | 1,3,4,25,2 2,5,6,7,8,2<br>7,30,31,32 6,28,29 | 9 P00762,P01681,P06760,P62804,Q00715,Q6P6R2,Q9QX74,Q9QYP1,Q9WTT6                |
| 3770 | 1,3,4,25,2 2,5,6,7,8,2<br>8,29,30,31 6,27,32 | 5 P01039,P25809,P50115,P50116,Q9JJ50                                            |
| 3771 | 1,3,4,25,2 2,5,6,7,8,2<br>8,29,30,32 6,27,31 | 6 O54858,P01039,P20766,P50115,P50116,Q62975                                     |

|      |                                              |                                                                                        |
|------|----------------------------------------------|----------------------------------------------------------------------------------------|
| 3772 | 1,3,4,25,2 2,5,6,7,8,2<br>8,29,31,32 6,27,30 | 6 P01039,P50115,P50116,P62804,Q8CJD3,Q9JJ50                                            |
| 3773 | 1,3,4,25,2 2,5,6,7,8,2<br>8,30,31,32 6,27,29 | 12 P01681,P06760,P25809,P50115,P50116,P62804,Q00715,Q4G075,Q62975,Q9JJ50,Q9QX74,Q9WTT6 |
| 3774 | 1,3,4,25,2 2,5,6,7,8,2<br>9,30,31,32 6,27,28 | 7 P07150,P25809,P50115,P50116,P62804,Q00715,Q9WTT6                                     |
| 3775 | 1,3,4,26,2 2,5,6,7,8,2<br>7,28,29,30 5,31,32 | 2 O54858,Q6IG02                                                                        |
| 3776 | 1,3,4,26,2 2,5,6,7,8,2<br>7,28,29,31 5,30,32 | 3 O54858,P02631,P70549                                                                 |
| 3777 | 1,3,4,26,2 2,5,6,7,8,2<br>7,28,29,32 5,30,31 | 4 O54858,P00758,Q62761;Q62762;Q62763,Q8CGS4                                            |
| 3778 | 1,3,4,26,2 2,5,6,7,8,2<br>7,28,30,31 5,29,32 | 0                                                                                      |
| 3779 | 1,3,4,26,2 2,5,6,7,8,2<br>7,28,30,32 5,29,31 | 2 P06760,Q8VD89                                                                        |
| 3780 | 1,3,4,26,2 2,5,6,7,8,2<br>7,28,31,32 5,29,30 | 2 O54728,P62804                                                                        |
| 3781 | 1,3,4,26,2 2,5,6,7,8,2<br>7,29,30,31 5,28,32 | 3 O54858,P02631,Q6IG02                                                                 |
| 3782 | 1,3,4,26,2 2,5,6,7,8,2<br>7,29,30,32 5,28,31 | 3 O54858,P50115,Q6IG02                                                                 |
| 3783 | 1,3,4,26,2 2,5,6,7,8,2<br>7,29,31,32 5,28,30 | 3 O54858,P02631,P62804                                                                 |
| 3784 | 1,3,4,26,2 2,5,6,7,8,2<br>7,30,31,32 5,28,29 | 7 P00762,P02631,P06760,P50115,P62804,Q00715,Q9QYP1                                     |
| 3785 | 1,3,4,26,2 2,5,6,7,8,2<br>8,29,30,31 5,27,32 | 4 O54858,P01039,P50115,P50116                                                          |
| 3786 | 1,3,4,26,2 2,5,6,7,8,2<br>8,29,30,32 5,27,31 | 5 O54858,P01039,P20766,P50115,P50116                                                   |
| 3787 | 1,3,4,26,2 2,5,6,7,8,2<br>8,29,31,32 5,27,30 | 6 O54728,O54858,P01039,P50115,P50116,P62804                                            |
| 3788 | 1,3,4,26,2 2,5,6,7,8,2<br>8,30,31,32 5,27,29 | 9 O54728,P06760,P25809,P50115,P50116,P62804,Q00715,Q08163,Q4G075                       |
| 3789 | 1,3,4,26,2 2,5,6,7,8,2<br>9,30,31,32 5,27,28 | 7 P02631,P25809,P50115,P50116,P62804,Q00715,Q4G075                                     |
| 3790 | 1,3,4,27,2 2,5,6,7,8,2<br>8,29,30,31 5,26,32 | 3 O54858,P50115,Q6IG02                                                                 |
| 3791 | 1,3,4,27,2 2,5,6,7,8,2<br>8,29,30,32 5,26,31 | 4 O54858,P20766,P50115,Q6IG02                                                          |

|      |                          |                               |                                                                  |
|------|--------------------------|-------------------------------|------------------------------------------------------------------|
| 3792 | 1,3,4,27,2<br>8,29,31,32 | 2,5,6,7,8,2<br>5,26,30        | 3 O54858,P50115,Q62761;Q62762;Q62763                             |
| 3793 | 1,3,4,27,2<br>8,30,31,32 | 2,5,6,7,8,2<br>5,26,29        | 6 P06760,P22006,P50115,P62804,Q8VD89,Q9QX74                      |
| 3794 | 1,3,4,27,2<br>9,30,31,32 | 2,5,6,7,8,2<br>5,26,28        | 7 B0BNN3,O54858,P00762,P08649,P50115,Q6IG02,Q9WTT6               |
| 3795 | 1,3,4,28,2<br>9,30,31,32 | 2,5,6,7,8,2<br>5,26,27        | 7 O54858,P01039,P17559,P50115,P50116,Q9JJ50,Q9WTT6               |
| 3796 | 1,3,5,6,7,8<br>,25,26    | 2,4,27,28,<br>29,30,31,3<br>2 | 2 P49134,P80299                                                  |
| 3797 | 1,3,5,6,7,8<br>,25,27    | 2,4,26,28,<br>29,30,31,3<br>2 | 2 P50115,P50116                                                  |
| 3798 | 1,3,5,6,7,8<br>,25,28    | 2,4,26,27,<br>29,30,31,3<br>2 | 3 P06911,Q09030,Q9QW07                                           |
| 3799 | 1,3,5,6,7,8<br>,25,29    | 2,4,26,27,<br>28,30,31,3<br>2 | 1 P49134                                                         |
| 3800 | 1,3,5,6,7,8<br>,25,30    | 2,4,26,27,<br>28,29,31,3<br>2 | 9 O70417,P49134,P80299,Q05511,Q09030,Q6IFU7,Q6IFW6,Q6IG05,Q6IMF3 |
| 3801 | 1,3,5,6,7,8<br>,25,31    | 2,4,26,27,<br>28,29,30,3<br>2 | 2 P49134,Q09030                                                  |
| 3802 | 1,3,5,6,7,8<br>,25,32    | 2,4,26,27,<br>28,29,30,3<br>1 | 3 P01681,P13432,Q09030                                           |
| 3803 | 1,3,5,6,7,8<br>,26,27    | 2,4,25,28,<br>29,30,31,3<br>2 | 4 D3ZUC6,P50115,P50116,Q62714                                    |
| 3804 | 1,3,5,6,7,8<br>,26,28    | 2,4,25,27,<br>29,30,31,3<br>2 | 7 D3ZUC6,P47967,P49134,P80299,Q5RLM2,Q9QW07,Q9QYP1               |
| 3805 | 1,3,5,6,7,8<br>,26,29    | 2,4,25,27,<br>28,30,31,3<br>2 | 7 D3ZUC6,O70594,P06760,P47967,P49134,Q9QX74,Q9QYP1               |
| 3806 | 1,3,5,6,7,8<br>,26,30    | 2,4,25,27,<br>28,29,31,3<br>2 | 4 P36374,P49134,P80299,Q6IG05                                    |

|      |                       |                               |                                                           |
|------|-----------------------|-------------------------------|-----------------------------------------------------------|
| 3807 | 1,3,5,6,7,8<br>,26,31 | 2,4,25,27,<br>28,29,30,3<br>2 | 4 D3ZUC6,P49134,P57113,Q62714                             |
| 3808 | 1,3,5,6,7,8<br>,26,32 | 2,4,25,27,<br>28,29,30,3<br>1 | 2 P57113,Q62714                                           |
| 3809 | 1,3,5,6,7,8<br>,27,28 | 2,4,25,26,<br>29,30,31,3<br>2 | 6 D3ZUC6,P19218,P47967,P50115,P50116,Q5I0D1               |
| 3810 | 1,3,5,6,7,8<br>,27,29 | 2,4,25,26,<br>28,30,31,3<br>2 | 5 D3ZUC6,P19218,P47967,P50115,Q5I0D1                      |
| 3811 | 1,3,5,6,7,8<br>,27,30 | 2,4,25,26,<br>28,29,31,3<br>2 | 6 P19218,Q6IFU7,Q6IFW6,Q6IG05,Q6IMF3,Q6P6Q2               |
| 3812 | 1,3,5,6,7,8<br>,27,31 | 2,4,25,26,<br>28,29,30,3<br>2 | 4 D3ZUC6,P19218,P50115,Q62714                             |
| 3813 | 1,3,5,6,7,8<br>,27,32 | 2,4,25,26,<br>28,29,30,3<br>1 | 2 P19218,Q62714                                           |
| 3814 | 1,3,5,6,7,8<br>,28,29 | 2,4,25,26,<br>27,30,31,3<br>2 | 8 D3ZUC6,P00762,P21674,P47967,P49134,P97840,Q9QW07,Q9QYP1 |
| 3815 | 1,3,5,6,7,8<br>,28,30 | 2,4,25,26,<br>27,29,31,3<br>2 | 6 D3ZUC6,P19218,P47967,P49134,Q6IFU7,Q6IG05               |
| 3816 | 1,3,5,6,7,8<br>,28,31 | 2,4,25,26,<br>27,29,30,3<br>2 | 4 D3ZUC6,P21674,P49134,Q811M5                             |
| 3817 | 1,3,5,6,7,8<br>,28,32 | 2,4,25,26,<br>27,29,30,3<br>1 | 4 D3ZUC6,P47967,Q9QW07,Q9QYP1                             |
| 3818 | 1,3,5,6,7,8<br>,29,30 | 2,4,25,26,<br>27,28,31,3<br>2 | 8 P19218,P49134,Q5RJR2,Q6IFU7,Q6IFW6,Q6IG05,Q6IMF3,Q6P6Q2 |
| 3819 | 1,3,5,6,7,8<br>,29,31 | 2,4,25,26,<br>27,28,30,3<br>2 | 5 D3ZUC6,O70594,P21674,P49134,Q5RJR2                      |

|      |                        |                               |                                                                  |
|------|------------------------|-------------------------------|------------------------------------------------------------------|
| 3820 | 1,3,5,6,7,8<br>,29,32  | 2,4,25,26,<br>27,28,30,3<br>1 | 1 Q9QYP1                                                         |
| 3821 | 1,3,5,6,7,8<br>,30,31  | 2,4,25,26,<br>27,28,29,3<br>2 | 9 P19218,P49134,Q09030,Q5RJR2,Q62714,Q6IFW6,Q6IG05,Q6IMF3,Q8CGS4 |
| 3822 | 1,3,5,6,7,8<br>,30,32  | 2,4,25,26,<br>27,28,29,3<br>1 | 5 P19218,P35280,Q6IFU7,Q6IG05,Q6IMF3                             |
| 3823 | 1,3,5,6,7,8<br>,31,32  | 2,4,25,26,<br>27,28,29,3<br>0 | 2 P57113,Q62714                                                  |
| 3824 | 1,3,5,6,7,2<br>5,26,27 | 2,4,8,28,2<br>9,30,31,32      | 1 P63081                                                         |
| 3825 | 1,3,5,6,7,2<br>5,26,28 | 2,4,8,27,2<br>9,30,31,32      | 0                                                                |
| 3826 | 1,3,5,6,7,2<br>5,26,29 | 2,4,8,27,2<br>8,30,31,32      | 0                                                                |
| 3827 | 1,3,5,6,7,2<br>5,26,30 | 2,4,8,27,2<br>8,29,31,32      | 4 P25809,P36374,P80299,Q6AYR9                                    |
| 3828 | 1,3,5,6,7,2<br>5,26,31 | 2,4,8,27,2<br>8,29,30,32      | 4 P25809,P57113,Q63150,Q6AYR9                                    |
| 3829 | 1,3,5,6,7,2<br>5,26,32 | 2,4,8,27,2<br>8,29,30,31      | 1 Q5PQL7                                                         |
| 3830 | 1,3,5,6,7,2<br>5,27,28 | 2,4,8,26,2<br>9,30,31,32      | 1 P63081                                                         |
| 3831 | 1,3,5,6,7,2<br>5,27,29 | 2,4,8,26,2<br>8,30,31,32      | 3 O54728,P05539,Q07523                                           |
| 3832 | 1,3,5,6,7,2<br>5,27,30 | 2,4,8,26,2<br>8,29,31,32      | 1 O54728                                                         |
| 3833 | 1,3,5,6,7,2<br>5,27,31 | 2,4,8,26,2<br>8,29,30,32      | 1 O54728                                                         |
| 3834 | 1,3,5,6,7,2<br>5,27,32 | 2,4,8,26,2<br>8,29,30,31      | 0                                                                |
| 3835 | 1,3,5,6,7,2<br>5,28,29 | 2,4,8,26,2<br>7,30,31,32      | 1 P05539                                                         |
| 3836 | 1,3,5,6,7,2<br>5,28,30 | 2,4,8,26,2<br>7,29,31,32      | 2 Q5PQL7,Q62975                                                  |
| 3837 | 1,3,5,6,7,2<br>5,28,31 | 2,4,8,26,2<br>7,29,30,32      | 1 P25809                                                         |

|      |                                              |                                                    |
|------|----------------------------------------------|----------------------------------------------------|
| 3838 | 1,3,5,6,7,2 2,4,8,26,2<br>5,28,32 7,29,30,31 | 2 Q5PQL7,Q62975                                    |
| 3839 | 1,3,5,6,7,2 2,4,8,26,2<br>5,29,30 7,28,31,32 | 2 O54728,Q9QWN8                                    |
| 3840 | 1,3,5,6,7,2 2,4,8,26,2<br>5,29,31 7,28,30,32 | 2 O54728,Q9QWN8                                    |
| 3841 | 1,3,5,6,7,2 2,4,8,26,2<br>5,29,32 7,28,30,31 | 0                                                  |
| 3842 | 1,3,5,6,7,2 2,4,8,26,2<br>5,30,31 7,28,29,32 | 6 O54728,P25809,Q09030,Q6AYR9,Q812E4,Q9QWN8        |
| 3843 | 1,3,5,6,7,2 2,4,8,26,2<br>5,30,32 7,28,29,31 | 5 P25809,Q5BJY9,Q5PQL7,Q62975,Q6P6R2               |
| 3844 | 1,3,5,6,7,2 2,4,8,26,2<br>5,31,32 7,28,29,30 | 1 P25809                                           |
| 3845 | 1,3,5,6,7,2 2,4,8,25,2<br>6,27,28 9,30,31,32 | 4 D3ZUC6,P21588,P47967,P97840                      |
| 3846 | 1,3,5,6,7,2 2,4,8,25,2<br>6,27,29 8,30,31,32 | 3 P21588,P47967,Q9JJ50                             |
| 3847 | 1,3,5,6,7,2 2,4,8,25,2<br>6,27,30 8,29,31,32 | 1 P21588                                           |
| 3848 | 1,3,5,6,7,2 2,4,8,25,2<br>6,27,31 8,29,30,32 | 1 Q62714                                           |
| 3849 | 1,3,5,6,7,2 2,4,8,25,2<br>6,27,32 8,29,30,31 | 2 Q62714,Q9JJ50                                    |
| 3850 | 1,3,5,6,7,2 2,4,8,25,2<br>6,28,29 7,30,31,32 | 7 D3ZUC6,P00762,P21674,P47967,P97840,Q01205,Q9QYP1 |
| 3851 | 1,3,5,6,7,2 2,4,8,25,2<br>6,28,30 7,29,31,32 | 3 P00762,P47967,P97840                             |
| 3852 | 1,3,5,6,7,2 2,4,8,25,2<br>6,28,31 7,29,30,32 | 2 P00762,P57113                                    |
| 3853 | 1,3,5,6,7,2 2,4,8,25,2<br>6,28,32 7,29,30,31 | 1 P47967                                           |
| 3854 | 1,3,5,6,7,2 2,4,8,25,2<br>6,29,30 7,28,31,32 | 0                                                  |
| 3855 | 1,3,5,6,7,2 2,4,8,25,2<br>6,29,31 7,28,30,32 | 1 P57113                                           |
| 3856 | 1,3,5,6,7,2 2,4,8,25,2<br>6,29,32 7,28,30,31 | 0                                                  |
| 3857 | 1,3,5,6,7,2 2,4,8,25,2<br>6,30,31 7,28,29,32 | 5 P25809,P47727,P57113,Q6AYR9,Q812E4               |

|      |                        |                          |                                                    |
|------|------------------------|--------------------------|----------------------------------------------------|
| 3858 | 1,3,5,6,7,2<br>6,30,32 | 2,4,8,25,2<br>7,28,29,31 | 0                                                  |
| 3859 | 1,3,5,6,7,2<br>6,31,32 | 2,4,8,25,2<br>7,28,29,30 | 2 P57113,Q62714                                    |
| 3860 | 1,3,5,6,7,2<br>7,28,29 | 2,4,8,25,2<br>6,30,31,32 | 7 D3ZUC6,P00507,P05539,P47967,P97840,Q07523,Q6AY61 |
| 3861 | 1,3,5,6,7,2<br>7,28,30 | 2,4,8,25,2<br>6,29,31,32 | 3 P19218,P47967,P97840                             |
| 3862 | 1,3,5,6,7,2<br>7,28,31 | 2,4,8,25,2<br>6,29,30,32 | 2 D3ZUC6,Q68G31                                    |
| 3863 | 1,3,5,6,7,2<br>7,28,32 | 2,4,8,25,2<br>6,29,30,31 | 3 P47967,Q62761;Q62762;Q62763,Q6AY61               |
| 3864 | 1,3,5,6,7,2<br>7,29,30 | 2,4,8,25,2<br>6,28,31,32 | 3 O54728,P19218,P47967                             |
| 3865 | 1,3,5,6,7,2<br>7,29,31 | 2,4,8,25,2<br>6,28,30,32 | 2 O54728,Q07523                                    |
| 3866 | 1,3,5,6,7,2<br>7,29,32 | 2,4,8,25,2<br>6,28,30,31 | 3 P47967,Q07523,Q6AY61                             |
| 3867 | 1,3,5,6,7,2<br>7,30,31 | 2,4,8,25,2<br>6,28,29,32 | 2 O54728,P19218                                    |
| 3868 | 1,3,5,6,7,2<br>7,30,32 | 2,4,8,25,2<br>6,28,29,31 | 1 P19218                                           |
| 3869 | 1,3,5,6,7,2<br>7,31,32 | 2,4,8,25,2<br>6,28,29,30 | 1 Q62714                                           |
| 3870 | 1,3,5,6,7,2<br>8,29,30 | 2,4,8,25,2<br>6,27,31,32 | 3 P00762,P47967,P97840                             |
| 3871 | 1,3,5,6,7,2<br>8,29,31 | 2,4,8,25,2<br>6,27,30,32 | 4 D3ZUC6,P00762,P21674,P47967                      |
| 3872 | 1,3,5,6,7,2<br>8,29,32 | 2,4,8,25,2<br>6,27,30,31 | 5 P47967,P54921,P97840,Q6AY61,Q9QYP1               |
| 3873 | 1,3,5,6,7,2<br>8,30,31 | 2,4,8,25,2<br>6,27,29,32 | 2 P00762,P25809                                    |
| 3874 | 1,3,5,6,7,2<br>8,30,32 | 2,4,8,25,2<br>6,27,29,31 | 2 Q5BJY9,Q62975                                    |
| 3875 | 1,3,5,6,7,2<br>8,31,32 | 2,4,8,25,2<br>6,27,29,30 | 0                                                  |
| 3876 | 1,3,5,6,7,2<br>9,30,31 | 2,4,8,25,2<br>6,27,28,32 | 3 O54728,P36860,Q9QWN8                             |
| 3877 | 1,3,5,6,7,2<br>9,30,32 | 2,4,8,25,2<br>6,27,28,31 | 3 P01835,P26342,Q5BJY9                             |

|      |                        |                          |                                                                  |
|------|------------------------|--------------------------|------------------------------------------------------------------|
| 3878 | 1,3,5,6,7,2<br>9,31,32 | 2,4,8,25,2<br>6,27,28,30 | 0                                                                |
| 3879 | 1,3,5,6,7,3<br>0,31,32 | 2,4,8,25,2<br>6,27,28,29 | 7 P20646,P25809,P26342,P36860,Q5BJY9,Q62714,Q6P6R2               |
| 3880 | 1,3,5,6,8,2<br>5,26,27 | 2,4,7,28,2<br>9,30,31,32 | 1 P80299                                                         |
| 3881 | 1,3,5,6,8,2<br>5,26,28 | 2,4,7,27,2<br>9,30,31,32 | 2 P00714,P80299                                                  |
| 3882 | 1,3,5,6,8,2<br>5,26,29 | 2,4,7,27,2<br>8,30,31,32 | 2 P13432,P80299                                                  |
| 3883 | 1,3,5,6,8,2<br>5,26,30 | 2,4,7,27,2<br>8,29,31,32 | 6 O88797,P80299,Q05511,Q06000,Q6IFU7,Q6IG05                      |
| 3884 | 1,3,5,6,8,2<br>5,26,31 | 2,4,7,27,2<br>8,29,30,32 | 1 P80299                                                         |
| 3885 | 1,3,5,6,8,2<br>5,26,32 | 2,4,7,27,2<br>8,29,30,31 | 4 P01681,P13432,P80299,Q06000                                    |
| 3886 | 1,3,5,6,8,2<br>5,27,28 | 2,4,7,26,2<br>9,30,31,32 | 2 P36860,P80299                                                  |
| 3887 | 1,3,5,6,8,2<br>5,27,29 | 2,4,7,26,2<br>8,30,31,32 | 0                                                                |
| 3888 | 1,3,5,6,8,2<br>5,27,30 | 2,4,7,26,2<br>8,29,31,32 | 9 P19218,P80299,Q05511,Q6IFU7,Q6IFW6,Q6IG02,Q6IG05,Q6IMF3,Q6P6Q2 |
| 3889 | 1,3,5,6,8,2<br>5,27,31 | 2,4,7,26,2<br>8,29,30,32 | 3 P23739,Q80WL1,Q9R168                                           |
| 3890 | 1,3,5,6,8,2<br>5,27,32 | 2,4,7,26,2<br>8,29,30,31 | 2 P01681,Q80WL1                                                  |
| 3891 | 1,3,5,6,8,2<br>5,28,29 | 2,4,7,26,2<br>7,30,31,32 | 1 P80299                                                         |
| 3892 | 1,3,5,6,8,2<br>5,28,30 | 2,4,7,26,2<br>7,29,31,32 | 5 O88797,P80299,Q09030,Q6IFU7,Q6IG05                             |
| 3893 | 1,3,5,6,8,2<br>5,28,31 | 2,4,7,26,2<br>7,29,30,32 | 4 P36376,Q09030,Q80WL1,Q9R168                                    |
| 3894 | 1,3,5,6,8,2<br>5,28,32 | 2,4,7,26,2<br>7,29,30,31 | 2 P01681,Q80WL1                                                  |
| 3895 | 1,3,5,6,8,2<br>5,29,30 | 2,4,7,26,2<br>7,28,31,32 | 8 O88797,P80299,Q6IFU7,Q6IFW6,Q6IG02,Q6IG05,Q6IMF3,Q6P6Q2        |
| 3896 | 1,3,5,6,8,2<br>5,29,31 | 2,4,7,26,2<br>7,28,30,32 | 2 Q80WL1,Q9R168                                                  |
| 3897 | 1,3,5,6,8,2<br>5,29,32 | 2,4,7,26,2<br>7,28,30,31 | 3 P01681,P13432,Q80WL1                                           |



|      |                        |                          |   |                                                         |
|------|------------------------|--------------------------|---|---------------------------------------------------------|
| 3898 | 1,3,5,6,8,2<br>5,30,31 | 2,4,7,26,2<br>7,28,29,32 | 7 | P20646,Q09030,Q6IFU7,Q6IFW6,Q6IG05,Q6IMF3,Q8CGS4        |
| 3899 | 1,3,5,6,8,2<br>5,30,32 | 2,4,7,26,2<br>7,28,29,31 | 8 | O88797,P01681,P20646,P80299,Q09030,Q6IFU7,Q6IG05,Q6IMF3 |
| 3900 | 1,3,5,6,8,2<br>5,31,32 | 2,4,7,26,2<br>7,28,29,30 | 4 | P01681,P20646,Q09030,Q80WL1                             |
| 3901 | 1,3,5,6,8,2<br>6,27,28 | 2,4,7,25,2<br>9,30,31,32 | 2 | D3ZUC6,P80299                                           |
| 3902 | 1,3,5,6,8,2<br>6,27,29 | 2,4,7,25,2<br>8,30,31,32 | 0 |                                                         |
| 3903 | 1,3,5,6,8,2<br>6,27,30 | 2,4,7,25,2<br>8,29,31,32 | 3 | P80299,Q6IFU7,Q6IG05                                    |
| 3904 | 1,3,5,6,8,2<br>6,27,31 | 2,4,7,25,2<br>8,29,30,32 | 1 | Q9R168                                                  |
| 3905 | 1,3,5,6,8,2<br>6,27,32 | 2,4,7,25,2<br>8,29,30,31 | 0 |                                                         |
| 3906 | 1,3,5,6,8,2<br>6,28,29 | 2,4,7,25,2<br>7,30,31,32 | 4 | D3ZUC6,P21674,P80299,Q9QYP1                             |
| 3907 | 1,3,5,6,8,2<br>6,28,30 | 2,4,7,25,2<br>7,29,31,32 | 2 | P80299,Q6IFU7                                           |
| 3908 | 1,3,5,6,8,2<br>6,28,31 | 2,4,7,25,2<br>7,29,30,32 | 2 | D3ZUC6,Q9R168                                           |
| 3909 | 1,3,5,6,8,2<br>6,28,32 | 2,4,7,25,2<br>7,29,30,31 | 2 | P80299,Q9QYP1                                           |
| 3910 | 1,3,5,6,8,2<br>6,29,30 | 2,4,7,25,2<br>7,28,31,32 | 4 | O88797,P80299,Q5RJR2,Q6IFU7                             |
| 3911 | 1,3,5,6,8,2<br>6,29,31 | 2,4,7,25,2<br>7,28,30,32 | 2 | P70549,Q9R168                                           |
| 3912 | 1,3,5,6,8,2<br>6,29,32 | 2,4,7,25,2<br>7,28,30,31 | 2 | P13432,Q9QYP1                                           |
| 3913 | 1,3,5,6,8,2<br>6,30,31 | 2,4,7,25,2<br>7,28,29,32 | 4 | P0C0A9,Q5RJR2,Q6IG05,Q8CGS4                             |
| 3914 | 1,3,5,6,8,2<br>6,30,32 | 2,4,7,25,2<br>7,28,29,31 | 2 | O88797,P80299                                           |
| 3915 | 1,3,5,6,8,2<br>6,31,32 | 2,4,7,25,2<br>7,28,29,30 | 1 | Q62714                                                  |
| 3916 | 1,3,5,6,8,2<br>7,28,29 | 2,4,7,25,2<br>6,30,31,32 | 3 | D3ZUC6,P19218,P47967                                    |
| 3917 | 1,3,5,6,8,2<br>7,28,30 | 2,4,7,25,2<br>6,29,31,32 | 4 | P19218,Q6IFU7,Q6IG05,Q6P6Q2                             |

|      |                         |                          |                                                           |
|------|-------------------------|--------------------------|-----------------------------------------------------------|
| 3918 | 1,3,5,6,8,2<br>7,28,31  | 2,4,7,25,2<br>6,29,30,32 | 2 D3ZUC6,Q9R168                                           |
| 3919 | 1,3,5,6,8,2<br>7,28,32  | 2,4,7,25,2<br>6,29,30,31 | 1 P19218                                                  |
| 3920 | 1,3,5,6,8,2<br>7,29,30  | 2,4,7,25,2<br>6,28,31,32 | 7 P19218,Q6IFU7,Q6IFW6,Q6IG02,Q6IG05,Q6IMF3,Q6P6Q2        |
| 3921 | 1,3,5,6,8,2<br>7,29,31  | 2,4,7,25,2<br>6,28,30,32 | 1 Q9R168                                                  |
| 3922 | 1,3,5,6,8,2<br>7,29,32  | 2,4,7,25,2<br>6,28,30,31 | 0                                                         |
| 3923 | 1,3,5,6,8,2<br>7,30,31  | 2,4,7,25,2<br>6,28,29,32 | 8 P19218,P20646,Q6IFU7,Q6IFW6,Q6IG05,Q6IMF3,Q6P6Q2,Q9R168 |
| 3924 | 1,3,5,6,8,2<br>7,30,32  | 2,4,7,25,2<br>6,28,29,31 | 7 P19218,P20646,Q5I0J9,Q6IFU7,Q6IG05,Q6IMF3,Q6P6Q2        |
| 3925 | 1,3,5,6,8,2<br>7,31,32  | 2,4,7,25,2<br>6,28,29,30 | 4 P20646,P23739,Q62714,Q80WL1                             |
| 3926 | 1,3,5,6,8,2<br>8,29,30  | 2,4,7,25,2<br>6,27,31,32 | 5 O88797,P19218,Q6IFU7,Q6IMF3,Q9QYP1                      |
| 3927 | 1,3,5,6,8,2<br>8,29,31  | 2,4,7,25,2<br>6,27,30,32 | 3 D3ZUC6,P21674,Q9R168                                    |
| 3928 | 1,3,5,6,8,2<br>8,29,32  | 2,4,7,25,2<br>6,27,30,31 | 1 Q9QYP1                                                  |
| 3929 | 1,3,5,6,8,2<br>8,30,31  | 2,4,7,25,2<br>6,27,29,32 | 3 P19218,Q6IFU7,Q6IG05                                    |
| 3930 | 1,3,5,6,8,2<br>8,30,32  | 2,4,7,25,2<br>6,27,29,31 | 3 O88797,P19218,Q6IFU7                                    |
| 3931 | 1,3,5,6,8,2<br>8,31,32  | 2,4,7,25,2<br>6,27,29,30 | 1 Q80WL1                                                  |
| 3932 | 1,3,5,6,8,2<br>9,30,31  | 2,4,7,25,2<br>6,27,28,32 | 6 Q5RJR2,Q6IFU7,Q6IFW6,Q6IG02,Q6IG05,Q6IMF3               |
| 3933 | 1,3,5,6,8,2<br>9,30,32  | 2,4,7,25,2<br>6,27,28,31 | 4 O88797,Q5I0J9,Q6IFU7,Q6IMF3                             |
| 3934 | 1,3,5,6,8,2<br>9,31,32  | 2,4,7,25,2<br>6,27,28,30 | 1 Q80WL1                                                  |
| 3935 | 1,3,5,6,8,3<br>0,31,32  | 2,4,7,25,2<br>6,27,28,29 | 5 O88797,O89117,P20646,Q6IG05,Q6IMF3                      |
| 3936 | 1,3,5,6,25,<br>26,27,28 | 2,4,7,8,29,<br>30,31,32  | 3 P63081,P80299,P82471                                    |
| 3937 | 1,3,5,6,25,<br>26,27,29 | 2,4,7,8,28,<br>30,31,32  | 1 P82471                                                  |

|      |                                              |                                                                  |
|------|----------------------------------------------|------------------------------------------------------------------|
| 3938 | 1,3,5,6,25, 2,4,7,8,28,<br>26,27,30 29,31,32 | 4 P21588,P80299,P82471,Q06000                                    |
| 3939 | 1,3,5,6,25, 2,4,7,8,28,<br>26,27,31 29,30,32 | 1 P62804                                                         |
| 3940 | 1,3,5,6,25, 2,4,7,8,28,<br>26,27,32 29,30,31 | 3 P62804,P82471,Q06000                                           |
| 3941 | 1,3,5,6,25, 2,4,7,8,27,<br>26,28,29 30,31,32 | 4 P00714,P80299,P82471,Q01205                                    |
| 3942 | 1,3,5,6,25, 2,4,7,8,27,<br>26,28,30 29,31,32 | 7 P00714,P80299,P82471,Q4G075,Q5PQL7,Q62975,Q6TMA8               |
| 3943 | 1,3,5,6,25, 2,4,7,8,27,<br>26,28,31 29,30,32 | 4 P00714,P25809,P62804,Q4G075                                    |
| 3944 | 1,3,5,6,25, 2,4,7,8,27,<br>26,28,32 29,30,31 | 7 P19223,P62804,P82471,Q06000,Q4G075,Q5PQL7,Q62975               |
| 3945 | 1,3,5,6,25, 2,4,7,8,27,<br>26,29,30 28,31,32 | 2 P80299,P82471                                                  |
| 3946 | 1,3,5,6,25, 2,4,7,8,27,<br>26,29,31 28,30,32 | 1 P70549                                                         |
| 3947 | 1,3,5,6,25, 2,4,7,8,27,<br>26,29,32 28,30,31 | 1 P82471                                                         |
| 3948 | 1,3,5,6,25, 2,4,7,8,27,<br>26,30,31 28,29,32 | 9 P01946,P22282,P25809,P47727,P62804,Q00715,Q4G075,Q6AYR9,Q812E4 |
| 3949 | 1,3,5,6,25, 2,4,7,8,27,<br>26,30,32 28,29,31 | 8 P25809,P62804,P80299,P82471,Q00715,Q06000,Q4G075,Q5PQL7        |
| 3950 | 1,3,5,6,25, 2,4,7,8,27,<br>26,31,32 28,29,30 | 4 P25809,P62804,Q00715,Q4G075                                    |
| 3951 | 1,3,5,6,25, 2,4,7,8,26,<br>27,28,29 30,31,32 | 2 P05539,P82471                                                  |
| 3952 | 1,3,5,6,25, 2,4,7,8,26,<br>27,28,30 29,31,32 | 1 P82471                                                         |
| 3953 | 1,3,5,6,25, 2,4,7,8,26,<br>27,28,31 29,30,32 | 0                                                                |
| 3954 | 1,3,5,6,25, 2,4,7,8,26,<br>27,28,32 29,30,31 | 3 P62804,P82471,Q62761;Q62762;Q62763                             |
| 3955 | 1,3,5,6,25, 2,4,7,8,26,<br>27,29,30 28,31,32 | 3 O54728,P82471,Q6IG02                                           |
| 3956 | 1,3,5,6,25, 2,4,7,8,26,<br>27,29,31 28,30,32 | 1 O54728                                                         |
| 3957 | 1,3,5,6,25, 2,4,7,8,26,<br>27,29,32 28,30,31 | 2 P82471,Q9Z1F2                                                  |

|      |                                              |                                                                                               |
|------|----------------------------------------------|-----------------------------------------------------------------------------------------------|
| 3958 | 1,3,5,6,25, 2,4,7,8,26,<br>27,30,31 28,29,32 | 3 O54728,P30120,P62804                                                                        |
| 3959 | 1,3,5,6,25, 2,4,7,8,26,<br>27,30,32 28,29,31 | 6 P20646,P62804,P82471,Q6P6R2,Q9QX74,Q9WTT6                                                   |
| 3960 | 1,3,5,6,25, 2,4,7,8,26,<br>27,31,32 28,29,30 | 5 P20646,P23739,P62804,Q80WL1,Q9WTT6                                                          |
| 3961 | 1,3,5,6,25, 2,4,7,8,26,<br>28,29,30 27,31,32 | 1 P82471                                                                                      |
| 3962 | 1,3,5,6,25, 2,4,7,8,26,<br>28,29,31 27,30,32 | 1 P20762                                                                                      |
| 3963 | 1,3,5,6,25, 2,4,7,8,26,<br>28,29,32 27,30,31 | 2 P20762,P82471                                                                               |
| 3964 | 1,3,5,6,25, 2,4,7,8,26,<br>28,30,31 27,29,32 | 2 P25809,Q4G075                                                                               |
| 3965 | 1,3,5,6,25, 2,4,7,8,26,<br>28,30,32 27,29,31 | 8 P25809,P82471,Q4G075,Q5BJY9,Q5PQL7,Q62975,Q9QX74,Q9WTT6                                     |
| 3966 | 1,3,5,6,25, 2,4,7,8,26,<br>28,31,32 27,29,30 | 6 P20762,P25809,P62804,Q4G075,Q80WL1,Q9WTT6                                                   |
| 3967 | 1,3,5,6,25, 2,4,7,8,26,<br>29,30,31 27,28,32 | 8 O54728,P07150,P20762,P22282,P25809,Q6AYR9,Q9QWN8,Q9WTT6                                     |
| 3968 | 1,3,5,6,25, 2,4,7,8,26,<br>29,30,32 27,28,31 | 7 P07150,P25809,P82471,Q4G075,Q5BJY9,Q9WTT6,Q9Z1F2                                            |
| 3969 | 1,3,5,6,25, 2,4,7,8,26,<br>29,31,32 27,28,30 | 8 P07150,P20762,P25809,P62804,Q4G075,Q80WL1,Q9WTT6,Q9Z1F2                                     |
| 3970 | 1,3,5,6,25, 2,4,7,8,26,<br>30,31,32 27,28,29 | 13 P07150,P20646,P22273,P25809,P62804,P97584,Q00715,Q4G075,Q5BJY9,Q6P6R2,Q812E4,Q9QX74,Q9WTT6 |
| 3971 | 1,3,5,6,26, 2,4,7,8,25,<br>27,28,29 30,31,32 | 2 P47967,P82471                                                                               |
| 3972 | 1,3,5,6,26, 2,4,7,8,25,<br>27,28,30 29,31,32 | 2 P21588,P82471                                                                               |
| 3973 | 1,3,5,6,26, 2,4,7,8,25,<br>27,28,31 29,30,32 | 1 P62804                                                                                      |
| 3974 | 1,3,5,6,26, 2,4,7,8,25,<br>27,28,32 29,30,31 | 2 P62804,P82471                                                                               |
| 3975 | 1,3,5,6,26, 2,4,7,8,25,<br>27,29,30 28,31,32 | 3 P21588,P82471,Q811M5                                                                        |
| 3976 | 1,3,5,6,26, 2,4,7,8,25,<br>27,29,31 28,30,32 | 0                                                                                             |
| 3977 | 1,3,5,6,26, 2,4,7,8,25,<br>27,29,32 28,30,31 | 2 P82471,Q9JJ50                                                                               |

|      |                                              |                                                                                 |
|------|----------------------------------------------|---------------------------------------------------------------------------------|
| 3978 | 1,3,5,6,26, 2,4,7,8,25,<br>27,30,31 28,29,32 | 2 P30120,P62804                                                                 |
| 3979 | 1,3,5,6,26, 2,4,7,8,25,<br>27,30,32 28,29,31 | 2 P62804,P82471                                                                 |
| 3980 | 1,3,5,6,26, 2,4,7,8,25,<br>27,31,32 28,29,30 | 2 P62804,Q62714                                                                 |
| 3981 | 1,3,5,6,26, 2,4,7,8,25,<br>28,29,30 27,31,32 | 2 P82471,Q6TMA8                                                                 |
| 3982 | 1,3,5,6,26, 2,4,7,8,25,<br>28,29,31 27,30,32 | 2 P70549,Q01205                                                                 |
| 3983 | 1,3,5,6,26, 2,4,7,8,25,<br>28,29,32 27,30,31 | 2 P82471,Q9QYP1                                                                 |
| 3984 | 1,3,5,6,26, 2,4,7,8,25,<br>28,30,31 27,29,32 | 4 P25809,P62804,Q4G075,Q6TMA8                                                   |
| 3985 | 1,3,5,6,26, 2,4,7,8,25,<br>28,30,32 27,29,31 | 3 P62804,P82471,Q4G075                                                          |
| 3986 | 1,3,5,6,26, 2,4,7,8,25,<br>28,31,32 27,29,30 | 3 P22006,P62804,Q4G075                                                          |
| 3987 | 1,3,5,6,26, 2,4,7,8,25,<br>29,30,31 27,28,32 | 6 P0C0A9,P22282,P36860,Q4G075,Q6AYR9,Q9QWN8                                     |
| 3988 | 1,3,5,6,26, 2,4,7,8,25,<br>29,30,32 27,28,31 | 3 P36860,P82471,Q4G075                                                          |
| 3989 | 1,3,5,6,26, 2,4,7,8,25,<br>29,31,32 27,28,30 | 3 P36860,P62804,Q4G075                                                          |
| 3990 | 1,3,5,6,26, 2,4,7,8,25,<br>30,31,32 27,28,29 | 11 P0C0A9,P20646,P22273,P25809,P36860,P47727,P62804,Q00715,Q4G075,Q812E4,Q9WTT6 |
| 3991 | 1,3,5,6,27, 2,4,7,8,25,<br>28,29,30 26,31,32 | 2 P19218,P82471                                                                 |
| 3992 | 1,3,5,6,27, 2,4,7,8,25,<br>28,29,31 26,30,32 | 1 P05539                                                                        |
| 3993 | 1,3,5,6,27, 2,4,7,8,25,<br>28,29,32 26,30,31 | 3 P82471,Q62761;Q62762;Q62763,Q6AY61                                            |
| 3994 | 1,3,5,6,27, 2,4,7,8,25,<br>28,30,31 26,29,32 | 0                                                                               |
| 3995 | 1,3,5,6,27, 2,4,7,8,25,<br>28,30,32 26,29,31 | 5 P19218,P82471,Q5I0J9,Q8VD89,Q9QX74                                            |
| 3996 | 1,3,5,6,27, 2,4,7,8,25,<br>28,31,32 26,29,30 | 2 P22006,P62804                                                                 |
| 3997 | 1,3,5,6,27, 2,4,7,8,25,<br>29,30,31 26,28,32 | 1 O54728                                                                        |

|      |                                              |                                                                          |
|------|----------------------------------------------|--------------------------------------------------------------------------|
| 3998 | 1,3,5,6,27, 2,4,7,8,25,<br>29,30,32 26,28,31 | 5 P82471,Q5I0J9,Q9WTT6,Q9Z0V6,Q9Z1F2                                     |
| 3999 | 1,3,5,6,27, 2,4,7,8,25,<br>29,31,32 26,28,30 | 2 P62804,Q9Z1F2                                                          |
| 4000 | 1,3,5,6,27, 2,4,7,8,25,<br>30,31,32 26,28,29 | 5 P20646,P62804,Q6P6R2,Q9QX74,Q9WTT6                                     |
| 4001 | 1,3,5,6,28, 2,4,7,8,25,<br>29,30,31 26,27,32 | 0                                                                        |
| 4002 | 1,3,5,6,28, 2,4,7,8,25,<br>29,30,32 26,27,31 | 5 P82471,Q4G075,Q5BJY9,Q9WTT6,Q9Z0V6                                     |
| 4003 | 1,3,5,6,28, 2,4,7,8,25,<br>29,31,32 26,27,30 | 2 P20762,Q4G075                                                          |
| 4004 | 1,3,5,6,28, 2,4,7,8,25,<br>30,31,32 26,27,29 | 7 P22006,P25809,P62804,Q4G075,Q5BJY9,Q9QX74,Q9WTT6                       |
| 4005 | 1,3,5,6,29, 2,4,7,8,25,<br>30,31,32 26,27,28 | 10 P07150,P20646,P25809,P26342,P36860,P62804,Q4G075,Q5BJY9,Q9WTT6,Q9Z1F2 |
| 4006 | 1,3,5,7,8,2 2,4,6,28,2<br>5,26,27 9,30,31,32 | 4 O55145,P22006,P80299,Q9WTT6                                            |
| 4007 | 1,3,5,7,8,2 2,4,6,27,2<br>5,26,28 9,30,31,32 | 4 O55145,P00714,P80299,Q9WTT6                                            |
| 4008 | 1,3,5,7,8,2 2,4,6,27,2<br>5,26,29 8,30,31,32 | 5 P06760,P22006,P49134,P80299,Q9QX74                                     |
| 4009 | 1,3,5,7,8,2 2,4,6,27,2<br>5,26,30 8,29,31,32 | 7 P22006,P49134,P80299,Q05511,Q6IFW6,Q6IG05,Q6IMF3                       |
| 4010 | 1,3,5,7,8,2 2,4,6,27,2<br>5,26,31 8,29,30,32 | 2 O55145,P49134                                                          |
| 4011 | 1,3,5,7,8,2 2,4,6,27,2<br>5,26,32 8,29,30,31 | 2 P01681,P80299                                                          |
| 4012 | 1,3,5,7,8,2 2,4,6,26,2<br>5,27,28 9,30,31,32 | 2 O55145,P36860                                                          |
| 4013 | 1,3,5,7,8,2 2,4,6,26,2<br>5,27,29 8,30,31,32 | 3 P06760,P22006,Q4G075                                                   |
| 4014 | 1,3,5,7,8,2 2,4,6,26,2<br>5,27,30 8,29,31,32 | 9 P22006,Q05511,Q4FZU2,Q6IFU7,Q6IFW6,Q6IG02,Q6IG05,Q6IMF3,Q6P6Q2         |
| 4015 | 1,3,5,7,8,2 2,4,6,26,2<br>5,27,31 8,29,30,32 | 4 O55145,P23739,Q68G31,Q80WL1                                            |
| 4016 | 1,3,5,7,8,2 2,4,6,26,2<br>5,27,32 8,29,30,31 | 2 P01681,Q80WL1                                                          |
| 4017 | 1,3,5,7,8,2 2,4,6,26,2<br>5,28,29 7,30,31,32 | 2 P06760,P22006                                                          |

|      |                        |                          |    |                                                                       |
|------|------------------------|--------------------------|----|-----------------------------------------------------------------------|
| 4018 | 1,3,5,7,8,2<br>5,28,30 | 2,4,6,26,2<br>7,29,31,32 | 5  | P80299,Q6IFU7,Q6IFW6,Q6IG05,Q6IMF3                                    |
| 4019 | 1,3,5,7,8,2<br>5,28,31 | 2,4,6,26,2<br>7,29,30,32 | 3  | O55145,Q80WL1,Q811M5                                                  |
| 4020 | 1,3,5,7,8,2<br>5,28,32 | 2,4,6,26,2<br>7,29,30,31 | 3  | P01681,Q80WL1,Q811M5                                                  |
| 4021 | 1,3,5,7,8,2<br>5,29,30 | 2,4,6,26,2<br>7,28,31,32 | 10 | O88797,P22006,Q05511,Q4FZU2,Q6IFU7,Q6IFW6,Q6IG02,Q6IG05,Q6IMF3,Q6P6Q2 |
| 4022 | 1,3,5,7,8,2<br>5,29,31 | 2,4,6,26,2<br>7,28,30,32 | 1  | Q80WL1                                                                |
| 4023 | 1,3,5,7,8,2<br>5,29,32 | 2,4,6,26,2<br>7,28,30,31 | 2  | P01681,Q80WL1                                                         |
| 4024 | 1,3,5,7,8,2<br>5,30,31 | 2,4,6,26,2<br>7,28,29,32 | 6  | Q05511,Q4FZU2,Q6IFW6,Q6IG05,Q6IMF3,Q6P6Q2                             |
| 4025 | 1,3,5,7,8,2<br>5,30,32 | 2,4,6,26,2<br>7,28,29,31 | 9  | O88797,P01681,P35280,Q05511,Q4FZU2,Q6IFW6,Q6IG05,Q6IMF3,Q6P6Q2        |
| 4026 | 1,3,5,7,8,2<br>5,31,32 | 2,4,6,26,2<br>7,28,29,30 | 4  | P01681,P21588,Q80WL1,Q811M5                                           |
| 4027 | 1,3,5,7,8,2<br>6,27,28 | 2,4,6,25,2<br>9,30,31,32 | 6  | D3ZUC6,O55145,P47967,P97840,Q5RLM2,Q9WTT6                             |
| 4028 | 1,3,5,7,8,2<br>6,27,29 | 2,4,6,25,2<br>8,30,31,32 | 7  | D3ZUC6,P06760,P22006,P47967,Q5I0D1,Q9QX74,Q9WTT6                      |
| 4029 | 1,3,5,7,8,2<br>6,27,30 | 2,4,6,25,2<br>8,29,31,32 | 5  | Q6IFU7,Q6IFW6,Q6IG05,Q6IMF3,Q6P6Q2                                    |
| 4030 | 1,3,5,7,8,2<br>6,27,31 | 2,4,6,25,2<br>8,29,30,32 | 2  | O55145,Q68G31                                                         |
| 4031 | 1,3,5,7,8,2<br>6,27,32 | 2,4,6,25,2<br>8,29,30,31 | 0  |                                                                       |
| 4032 | 1,3,5,7,8,2<br>6,28,29 | 2,4,6,25,2<br>7,30,31,32 | 10 | D3ZUC6,P06760,P21674,P47967,P49134,P97840,Q6P6R2,Q9QX74,Q9QYP1,Q9WTT6 |
| 4033 | 1,3,5,7,8,2<br>6,28,30 | 2,4,6,25,2<br>7,29,31,32 | 4  | P47967,P49134,P80299,P97840                                           |
| 4034 | 1,3,5,7,8,2<br>6,28,31 | 2,4,6,25,2<br>7,29,30,32 | 4  | D3ZUC6,O55145,Q5RLM2,Q811M5                                           |
| 4035 | 1,3,5,7,8,2<br>6,28,32 | 2,4,6,25,2<br>7,29,30,31 | 2  | D3ZUC6,P47967                                                         |
| 4036 | 1,3,5,7,8,2<br>6,29,30 | 2,4,6,25,2<br>7,28,31,32 | 6  | P22006,P49134,Q6IFU7,Q6IFW6,Q6IMF3,Q9QX74                             |
| 4037 | 1,3,5,7,8,2<br>6,29,31 | 2,4,6,25,2<br>7,28,30,32 | 3  | P06760,P49134,Q9QX74                                                  |

|      |                        |                          |                                                                          |
|------|------------------------|--------------------------|--------------------------------------------------------------------------|
| 4038 | 1,3,5,7,8,2<br>6,29,32 | 2,4,6,25,2<br>7,28,30,31 | 0                                                                        |
| 4039 | 1,3,5,7,8,2<br>6,30,31 | 2,4,6,25,2<br>7,28,29,32 | 3 P49134,Q6IG05,Q6IMF3                                                   |
| 4040 | 1,3,5,7,8,2<br>6,30,32 | 2,4,6,25,2<br>7,28,29,31 | 1 P35280                                                                 |
| 4041 | 1,3,5,7,8,2<br>6,31,32 | 2,4,6,25,2<br>7,28,29,30 | 1 Q62714                                                                 |
| 4042 | 1,3,5,7,8,2<br>7,28,29 | 2,4,6,25,2<br>6,30,31,32 | 7 D3ZUC6,P00507,P06760,P47967,P97840,Q5I0D1,Q812E4                       |
| 4043 | 1,3,5,7,8,2<br>7,28,30 | 2,4,6,25,2<br>6,29,31,32 | 9 D3ZUC6,P19218,P47967,P97840,Q6IFU7,Q6IFW6,Q6IG05,Q6IMF3,Q6P6Q2         |
| 4044 | 1,3,5,7,8,2<br>7,28,31 | 2,4,6,25,2<br>6,29,30,32 | 4 D3ZUC6,O55145,P47967,Q68G31                                            |
| 4045 | 1,3,5,7,8,2<br>7,28,32 | 2,4,6,25,2<br>6,29,30,31 | 3 D3ZUC6,P47967,P97840                                                   |
| 4046 | 1,3,5,7,8,2<br>7,29,30 | 2,4,6,25,2<br>6,28,31,32 | 10 P19218,P22006,P47967,Q4FZU2,Q6IFU7,Q6IFW6,Q6IG02,Q6IG05,Q6IMF3,Q6P6Q2 |
| 4047 | 1,3,5,7,8,2<br>7,29,31 | 2,4,6,25,2<br>6,28,30,32 | 3 D3ZUC6,P06760,Q68G31                                                   |
| 4048 | 1,3,5,7,8,2<br>7,29,32 | 2,4,6,25,2<br>6,28,30,31 | 1 P47967                                                                 |
| 4049 | 1,3,5,7,8,2<br>7,30,31 | 2,4,6,25,2<br>6,28,29,32 | 9 P19218,P23739,Q4FZU2,Q6AYR8,Q6IFU7,Q6IFW6,Q6IG05,Q6IMF3,Q6P6Q2         |
| 4050 | 1,3,5,7,8,2<br>7,30,32 | 2,4,6,25,2<br>6,28,29,31 | 8 P19218,P35280,Q4FZU2,Q6IFU7,Q6IFW6,Q6IG05,Q6IMF3,Q6P6Q2                |
| 4051 | 1,3,5,7,8,2<br>7,31,32 | 2,4,6,25,2<br>6,28,29,30 | 3 P23739,Q62714,Q80WL1                                                   |
| 4052 | 1,3,5,7,8,2<br>8,29,30 | 2,4,6,25,2<br>6,27,31,32 | 9 D3ZUC6,P21674,P47967,P97840,Q6IFU7,Q6IFW6,Q6IMF3,Q6P6Q2,Q9QYP1         |
| 4053 | 1,3,5,7,8,2<br>8,29,31 | 2,4,6,25,2<br>6,27,30,32 | 4 D3ZUC6,P21674,P47967,Q811M5                                            |
| 4054 | 1,3,5,7,8,2<br>8,29,32 | 2,4,6,25,2<br>6,27,30,31 | 6 D3ZUC6,P21674,P47967,P54921,P97840,Q9QYP1                              |
| 4055 | 1,3,5,7,8,2<br>8,30,31 | 2,4,6,25,2<br>6,27,29,32 | 2 Q6IG05,Q6IMF3                                                          |
| 4056 | 1,3,5,7,8,2<br>8,30,32 | 2,4,6,25,2<br>6,27,29,31 | 2 P35280,Q6IMF3                                                          |
| 4057 | 1,3,5,7,8,2<br>8,31,32 | 2,4,6,25,2<br>6,27,29,30 | 3 D3ZUC6,Q80WL1,Q811M5                                                   |



|      |                         |                          |   |                                                                |
|------|-------------------------|--------------------------|---|----------------------------------------------------------------|
| 4058 | 1,3,5,7,8,2<br>9,30,31  | 2,4,6,25,2<br>6,27,28,32 | 9 | P49134,Q4FZU2,Q5RJR2,Q6IFW6,Q6IG02,Q6IG05,Q6IMF3,Q6P6Q2,Q9QWN8 |
| 4059 | 1,3,5,7,8,2<br>9,30,32  | 2,4,6,25,2<br>6,27,28,31 | 7 | O88797,P35280,Q4FZU2,Q6IFU7,Q6IFW6,Q6IMF3,Q6P6Q2               |
| 4060 | 1,3,5,7,8,2<br>9,31,32  | 2,4,6,25,2<br>6,27,28,30 | 2 | P21588,Q80WL1                                                  |
| 4061 | 1,3,5,7,8,3<br>0,31,32  | 2,4,6,25,2<br>6,27,28,29 | 4 | P35280,Q4FZU2,Q6IG05,Q6IMF3                                    |
| 4062 | 1,3,5,7,25,<br>26,27,28 | 2,4,6,8,29,<br>30,31,32  | 2 | O55145,P00714                                                  |
| 4063 | 1,3,5,7,25,<br>26,27,29 | 2,4,6,8,28,<br>30,31,32  | 2 | P22006,Q63532                                                  |
| 4064 | 1,3,5,7,25,<br>26,27,30 | 2,4,6,8,28,<br>29,31,32  | 1 | Q05511                                                         |
| 4065 | 1,3,5,7,25,<br>26,27,31 | 2,4,6,8,28,<br>29,30,32  | 2 | O55145,Q68G31                                                  |
| 4066 | 1,3,5,7,25,<br>26,27,32 | 2,4,6,8,28,<br>29,30,31  | 0 |                                                                |
| 4067 | 1,3,5,7,25,<br>26,28,29 | 2,4,6,8,27,<br>30,31,32  | 3 | P00714,P22006,P47967                                           |
| 4068 | 1,3,5,7,25,<br>26,28,30 | 2,4,6,8,27,<br>29,31,32  | 3 | P00714,P80299,Q62975                                           |
| 4069 | 1,3,5,7,25,<br>26,28,31 | 2,4,6,8,27,<br>29,30,32  | 2 | O55145,P00714                                                  |
| 4070 | 1,3,5,7,25,<br>26,28,32 | 2,4,6,8,27,<br>29,30,31  | 1 | Q62975                                                         |
| 4071 | 1,3,5,7,25,<br>26,29,30 | 2,4,6,8,27,<br>28,31,32  | 1 | P22006                                                         |
| 4072 | 1,3,5,7,25,<br>26,29,31 | 2,4,6,8,27,<br>28,30,32  | 0 |                                                                |
| 4073 | 1,3,5,7,25,<br>26,29,32 | 2,4,6,8,27,<br>28,30,31  | 0 |                                                                |
| 4074 | 1,3,5,7,25,<br>26,30,31 | 2,4,6,8,27,<br>28,29,32  | 5 | P22282,P25809,P47727,Q6AYR9,Q812E4                             |
| 4075 | 1,3,5,7,25,<br>26,30,32 | 2,4,6,8,27,<br>28,29,31  | 1 | Q62975                                                         |
| 4076 | 1,3,5,7,25,<br>26,31,32 | 2,4,6,8,27,<br>28,29,30  | 1 | P25809                                                         |
| 4077 | 1,3,5,7,25,<br>27,28,29 | 2,4,6,8,26,<br>30,31,32  | 3 | P47967,P97840,Q6AY61                                           |

|      |                                              |                                             |
|------|----------------------------------------------|---------------------------------------------|
| 4078 | 1,3,5,7,25, 2,4,6,8,26,<br>27,28,30 29,31,32 | 0                                           |
| 4079 | 1,3,5,7,25, 2,4,6,8,26,<br>27,28,31 29,30,32 | 2 O55145,Q68G31                             |
| 4080 | 1,3,5,7,25, 2,4,6,8,26,<br>27,28,32 29,30,31 | 2 Q62761;Q62762;Q62763,Q6AY61               |
| 4081 | 1,3,5,7,25, 2,4,6,8,26,<br>27,29,30 28,31,32 | 6 O54728,P08649,P22006,Q63532,Q6IFW6,Q6IG02 |
| 4082 | 1,3,5,7,25, 2,4,6,8,26,<br>27,29,31 28,30,32 | 3 O54728,P08649,Q68G31                      |
| 4083 | 1,3,5,7,25, 2,4,6,8,26,<br>27,29,32 28,30,31 | 2 Q63532,Q6AY61                             |
| 4084 | 1,3,5,7,25, 2,4,6,8,26,<br>27,30,31 28,29,32 | 3 O54728,P08649,Q05511                      |
| 4085 | 1,3,5,7,25, 2,4,6,8,26,<br>27,30,32 28,29,31 | 1 Q05511                                    |
| 4086 | 1,3,5,7,25, 2,4,6,8,26,<br>27,31,32 28,29,30 | 2 P23739,Q80WL1                             |
| 4087 | 1,3,5,7,25, 2,4,6,8,26,<br>28,29,30 27,31,32 | 0                                           |
| 4088 | 1,3,5,7,25, 2,4,6,8,26,<br>28,29,31 27,30,32 | 1 P20762                                    |
| 4089 | 1,3,5,7,25, 2,4,6,8,26,<br>28,29,32 27,30,31 | 3 P20762,P54921,Q6AY61                      |
| 4090 | 1,3,5,7,25, 2,4,6,8,26,<br>28,30,31 27,29,32 | 2 P25809,Q62975                             |
| 4091 | 1,3,5,7,25, 2,4,6,8,26,<br>28,30,32 27,29,31 | 2 Q5BJY9,Q62975                             |
| 4092 | 1,3,5,7,25, 2,4,6,8,26,<br>28,31,32 27,29,30 | 3 Q62975,Q80WL1,Q811M5                      |
| 4093 | 1,3,5,7,25, 2,4,6,8,26,<br>29,30,31 27,28,32 | 6 O54728,P08649,P22282,P25809,P50280,Q9QWN8 |
| 4094 | 1,3,5,7,25, 2,4,6,8,26,<br>29,30,32 27,28,31 | 1 Q5BJY9                                    |
| 4095 | 1,3,5,7,25, 2,4,6,8,26,<br>29,31,32 27,28,30 | 3 P08649,P20762,Q80WL1                      |
| 4096 | 1,3,5,7,25, 2,4,6,8,26,<br>30,31,32 27,28,29 | 5 P08649,P22273,P25809,Q5BJY9,Q6P6R2        |
| 4097 | 1,3,5,7,26, 2,4,6,8,25,<br>27,28,29 30,31,32 | 3 D3ZUC6,P47967,P97840                      |

|      |                                              |                               |
|------|----------------------------------------------|-------------------------------|
| 4098 | 1,3,5,7,26, 2,4,6,8,25,<br>27,28,30 29,31,32 | 2 P47967,P97840               |
| 4099 | 1,3,5,7,26, 2,4,6,8,25,<br>27,28,31 29,30,32 | 3 O55145,P47967,Q68G31        |
| 4100 | 1,3,5,7,26, 2,4,6,8,25,<br>27,28,32 29,30,31 | 2 P47967,P97840               |
| 4101 | 1,3,5,7,26, 2,4,6,8,25,<br>27,29,30 28,31,32 | 3 P47967,P97840,Q63532        |
| 4102 | 1,3,5,7,26, 2,4,6,8,25,<br>27,29,31 28,30,32 | 3 P02631,P08649,Q68G31        |
| 4103 | 1,3,5,7,26, 2,4,6,8,25,<br>27,29,32 28,30,31 | 2 P47967,Q63532               |
| 4104 | 1,3,5,7,26, 2,4,6,8,25,<br>27,30,31 28,29,32 | 1 P08649                      |
| 4105 | 1,3,5,7,26, 2,4,6,8,25,<br>27,30,32 28,29,31 | 1 P12020                      |
| 4106 | 1,3,5,7,26, 2,4,6,8,25,<br>27,31,32 28,29,30 | 0                             |
| 4107 | 1,3,5,7,26, 2,4,6,8,25,<br>28,29,30 27,31,32 | 2 P47967,P97840               |
| 4108 | 1,3,5,7,26, 2,4,6,8,25,<br>28,29,31 27,30,32 | 4 P47967,P97840,Q01205,Q68G31 |
| 4109 | 1,3,5,7,26, 2,4,6,8,25,<br>28,29,32 27,30,31 | 3 P47967,P54921,P97840        |
| 4110 | 1,3,5,7,26, 2,4,6,8,25,<br>28,30,31 27,29,32 | 0                             |
| 4111 | 1,3,5,7,26, 2,4,6,8,25,<br>28,30,32 27,29,31 | 1 P97840                      |
| 4112 | 1,3,5,7,26, 2,4,6,8,25,<br>28,31,32 27,29,30 | 0                             |
| 4113 | 1,3,5,7,26, 2,4,6,8,25,<br>29,30,31 27,28,32 | 3 P08649,Q6AYR9,Q9QWN8        |
| 4114 | 1,3,5,7,26, 2,4,6,8,25,<br>29,30,32 27,28,31 | 0                             |
| 4115 | 1,3,5,7,26, 2,4,6,8,25,<br>29,31,32 27,28,30 | 1 P08649                      |
| 4116 | 1,3,5,7,26, 2,4,6,8,25,<br>30,31,32 27,28,29 | 2 P08649,P25809               |
| 4117 | 1,3,5,7,27, 2,4,6,8,25,<br>28,29,30 26,31,32 | 4 P00507,P08649,P47967,P97840 |

|      |                                              |                                                           |
|------|----------------------------------------------|-----------------------------------------------------------|
| 4118 | 1,3,5,7,27, 2,4,6,8,25,<br>28,29,31 26,30,32 | 6 D3ZUC6,P00507,P08649,P47967,P97840,Q68G31               |
| 4119 | 1,3,5,7,27, 2,4,6,8,25,<br>28,29,32 26,30,31 | 6 P08649,P47967,P54921,P97840,Q62761;Q62762;Q62763,Q6AY61 |
| 4120 | 1,3,5,7,27, 2,4,6,8,25,<br>28,30,31 26,29,32 | 1 P08649                                                  |
| 4121 | 1,3,5,7,27, 2,4,6,8,25,<br>28,30,32 26,29,31 | 3 P08649,P47967,P97840                                    |
| 4122 | 1,3,5,7,27, 2,4,6,8,25,<br>28,31,32 26,29,30 | 1 P08649                                                  |
| 4123 | 1,3,5,7,27, 2,4,6,8,25,<br>29,30,31 26,28,32 | 2 O54728,P08649                                           |
| 4124 | 1,3,5,7,27, 2,4,6,8,25,<br>29,30,32 26,28,31 | 1 P08649                                                  |
| 4125 | 1,3,5,7,27, 2,4,6,8,25,<br>29,31,32 26,28,30 | 1 P08649                                                  |
| 4126 | 1,3,5,7,27, 2,4,6,8,25,<br>30,31,32 26,28,29 | 2 P08649,P23739                                           |
| 4127 | 1,3,5,7,28, 2,4,6,8,25,<br>29,30,31 26,27,32 | 2 P08649,P17559                                           |
| 4128 | 1,3,5,7,28, 2,4,6,8,25,<br>29,30,32 26,27,31 | 6 P08649,P17559,P47967,P54921,P97840,Q5BJY9               |
| 4129 | 1,3,5,7,28, 2,4,6,8,25,<br>29,31,32 26,27,30 | 5 P08649,P17559,P20762,P54921,Q6AY61                      |
| 4130 | 1,3,5,7,28, 2,4,6,8,25,<br>30,31,32 26,27,29 | 4 P08649,P17559,P25809,Q5BJY9                             |
| 4131 | 1,3,5,7,29, 2,4,6,8,25,<br>30,31,32 26,27,28 | 5 P08649,P17559,P26342,P36860,Q5BJY9                      |
| 4132 | 1,3,5,8,25, 2,4,6,7,29,<br>26,27,28 30,31,32 | 5 O55145,P00714,P26342,P36860,P80299                      |
| 4133 | 1,3,5,8,25, 2,4,6,7,28,<br>26,27,29 30,31,32 | 2 P22006,P80299                                           |
| 4134 | 1,3,5,8,25, 2,4,6,7,28,<br>26,27,30 29,31,32 | 8 P80299,Q05511,Q63617,Q6IFU7,Q6IFW6,Q6IG05,Q6IMF3,Q6P6Q2 |
| 4135 | 1,3,5,8,25, 2,4,6,7,28,<br>26,27,31 29,30,32 | 5 O55145,P00714,P23739,Q80WL1,Q9R168                      |
| 4136 | 1,3,5,8,25, 2,4,6,7,28,<br>26,27,32 29,30,31 | 3 P01681,P80299,Q80WL1                                    |
| 4137 | 1,3,5,8,25, 2,4,6,7,27,<br>26,28,29 30,31,32 | 5 P00714,P01039,P22006,P80299,Q9Z0J6                      |

|      |                                              |                                                                                 |
|------|----------------------------------------------|---------------------------------------------------------------------------------|
| 4138 | 1,3,5,8,25, 2,4,6,7,27,<br>26,28,30 29,31,32 | 3 O88797,P00714,P80299                                                          |
| 4139 | 1,3,5,8,25, 2,4,6,7,27,<br>26,28,31 29,30,32 | 4 O55145,P00714,P80299,Q80WL1                                                   |
| 4140 | 1,3,5,8,25, 2,4,6,7,27,<br>26,28,32 29,30,31 | 3 P01681,P80299,Q80WL1                                                          |
| 4141 | 1,3,5,8,25, 2,4,6,7,27,<br>26,29,30 28,31,32 | 10 O88797,P00714,P05964,P11598,P22006,P80299,Q6IFU7,Q6IFW6,Q6IG02,Q6IMF3        |
| 4142 | 1,3,5,8,25, 2,4,6,7,27,<br>26,29,31 28,30,32 | 2 P00714,Q80WL1                                                                 |
| 4143 | 1,3,5,8,25, 2,4,6,7,27,<br>26,29,32 28,30,31 | 4 P01681,P13432,P80299,Q80WL1                                                   |
| 4144 | 1,3,5,8,25, 2,4,6,7,27,<br>26,30,31 28,29,32 | 9 O88797,P00714,P11598,P80299,Q05511,Q63617,Q6IFW6,Q6IG05,Q6IMF3                |
| 4145 | 1,3,5,8,25, 2,4,6,7,27,<br>26,30,32 28,29,31 | 5 O88797,P01681,P80299,Q05511,Q63617                                            |
| 4146 | 1,3,5,8,25, 2,4,6,7,27,<br>26,31,32 28,29,30 | 3 P01681,Q63617,Q80WL1                                                          |
| 4147 | 1,3,5,8,25, 2,4,6,7,26,<br>27,28,29 30,31,32 | 3 P22006,P36860,Q80WL1                                                          |
| 4148 | 1,3,5,8,25, 2,4,6,7,26,<br>27,28,30 29,31,32 | 7 P80299,Q05511,Q6IFU7,Q6IFW6,Q6IG05,Q6IMF3,Q6P6Q2                              |
| 4149 | 1,3,5,8,25, 2,4,6,7,26,<br>27,28,31 29,30,32 | 5 O55145,P00714,P23739,Q80WL1,Q9R168                                            |
| 4150 | 1,3,5,8,25, 2,4,6,7,26,<br>27,28,32 29,30,31 | 2 P01681,Q80WL1                                                                 |
| 4151 | 1,3,5,8,25, 2,4,6,7,26,<br>27,29,30 28,31,32 | 10 O88797,P22006,Q05511,Q4FZU2,Q6IFU7,Q6IFW6,Q6IG02,Q6IG05,Q6IMF3,Q6P6Q2        |
| 4152 | 1,3,5,8,25, 2,4,6,7,26,<br>27,29,31 28,30,32 | 2 Q80WL1,Q9R168                                                                 |
| 4153 | 1,3,5,8,25, 2,4,6,7,26,<br>27,29,32 28,30,31 | 2 P01681,Q80WL1                                                                 |
| 4154 | 1,3,5,8,25, 2,4,6,7,26,<br>27,30,31 28,29,32 | 11 P11598,P23739,Q05511,Q4FZU2,Q63617,Q6IFU7,Q6IFW6,Q6IG02,Q6IG05,Q6IMF3,Q6P6Q2 |
| 4155 | 1,3,5,8,25, 2,4,6,7,26,<br>27,30,32 28,29,31 | 9 O88797,P01681,Q05511,Q4FZU2,Q6IFU7,Q6IFW6,Q6IG05,Q6IMF3,Q6P6Q2                |
| 4156 | 1,3,5,8,25, 2,4,6,7,26,<br>27,31,32 28,29,30 | 3 P01681,P23739,Q80WL1                                                          |
| 4157 | 1,3,5,8,25, 2,4,6,7,26,<br>28,29,30 27,31,32 | 9 O88797,P00714,P22006,P80299,Q6IFU7,Q6IFW6,Q6IMF3,Q6P6Q2,Q9Z0J6                |

|      |                                              |                                                                                        |
|------|----------------------------------------------|----------------------------------------------------------------------------------------|
| 4158 | 1,3,5,8,25, 2,4,6,7,26,<br>28,29,31 27,30,32 | 3 P00714,Q80WL1,Q9R168                                                                 |
| 4159 | 1,3,5,8,25, 2,4,6,7,26,<br>28,29,32 27,30,31 | 3 P01039,P01681,Q80WL1                                                                 |
| 4160 | 1,3,5,8,25, 2,4,6,7,26,<br>28,30,31 27,29,32 | 4 P00714,Q6IFW6,Q6IG05,Q6IMF3                                                          |
| 4161 | 1,3,5,8,25, 2,4,6,7,26,<br>28,30,32 27,29,31 | 4 O88797,P01681,P80299,Q6IFU7                                                          |
| 4162 | 1,3,5,8,25, 2,4,6,7,26,<br>28,31,32 27,29,30 | 4 P01681,P21588,Q80WL1,Q811M5                                                          |
| 4163 | 1,3,5,8,25, 2,4,6,7,26,<br>29,30,31 27,28,32 | 10 O88797,P05964,P11598,Q4FZU2,Q6IFU7,Q6IFW6,Q6IG02,Q6IG05,Q6IMF3,Q6P6Q2               |
| 4164 | 1,3,5,8,25, 2,4,6,7,26,<br>29,30,32 27,28,31 | 8 O88797,P01681,P11598,Q4FZU2,Q6IFU7,Q6IFW6,Q6IMF3,Q6P6Q2                              |
| 4165 | 1,3,5,8,25, 2,4,6,7,26,<br>29,31,32 27,28,30 | 3 P01681,P21588,Q80WL1                                                                 |
| 4166 | 1,3,5,8,25, 2,4,6,7,26,<br>30,31,32 27,28,29 | 12 O88797,P01681,P11598,P20646,P21588,Q05511,Q4FZU2,Q63617,Q6IFW6,Q6IG05,Q6IMF3,Q80WL1 |
| 4167 | 1,3,5,8,26, 2,4,6,7,25,<br>27,28,29 30,31,32 | 4 D3ZUC6,P26342,P47967,Q6P6R2                                                          |
| 4168 | 1,3,5,8,26, 2,4,6,7,25,<br>27,28,30 29,31,32 | 2 P80299,Q6IFU7                                                                        |
| 4169 | 1,3,5,8,26, 2,4,6,7,25,<br>27,28,31 29,30,32 | 3 O55145,P00714,Q9R168                                                                 |
| 4170 | 1,3,5,8,26, 2,4,6,7,25,<br>27,28,32 29,30,31 | 1 Q9QWN8                                                                               |
| 4171 | 1,3,5,8,26, 2,4,6,7,25,<br>27,29,30 28,31,32 | 6 Q6IFU7,Q6IFW6,Q6IG02,Q6IG05,Q6IMF3,Q6P6Q2                                            |
| 4172 | 1,3,5,8,26, 2,4,6,7,25,<br>27,29,31 28,30,32 | 1 Q9R168                                                                               |
| 4173 | 1,3,5,8,26, 2,4,6,7,25,<br>27,29,32 28,30,31 | 0                                                                                      |
| 4174 | 1,3,5,8,26, 2,4,6,7,25,<br>27,30,31 28,29,32 | 4 P23739,Q6IFW6,Q6IG05,Q6IMF3                                                          |
| 4175 | 1,3,5,8,26, 2,4,6,7,25,<br>27,30,32 28,29,31 | 3 Q6IFU7,Q6IG05,Q6IMF3                                                                 |
| 4176 | 1,3,5,8,26, 2,4,6,7,25,<br>27,31,32 28,29,30 | 2 P23739,Q80WL1                                                                        |
| 4177 | 1,3,5,8,26, 2,4,6,7,25,<br>28,29,30 27,31,32 | 5 O88797,P00714,P80299,Q6IFU7,Q9QYP1                                                   |

|      |                                              |                                                                  |
|------|----------------------------------------------|------------------------------------------------------------------|
| 4178 | 1,3,5,8,26, 2,4,6,7,25,<br>28,29,31 27,30,32 | 2 P00714,Q9R168                                                  |
| 4179 | 1,3,5,8,26, 2,4,6,7,25,<br>28,29,32 27,30,31 | 1 Q9QYP1                                                         |
| 4180 | 1,3,5,8,26, 2,4,6,7,25,<br>28,30,31 27,29,32 | 1 P00714                                                         |
| 4181 | 1,3,5,8,26, 2,4,6,7,25,<br>28,30,32 27,29,31 | 2 O88797,P80299                                                  |
| 4182 | 1,3,5,8,26, 2,4,6,7,25,<br>28,31,32 27,29,30 | 1 Q80WL1                                                         |
| 4183 | 1,3,5,8,26, 2,4,6,7,25,<br>29,30,31 27,28,32 | 2 Q6IFW6,Q6IMF3                                                  |
| 4184 | 1,3,5,8,26, 2,4,6,7,25,<br>29,30,32 27,28,31 | 3 O88797,Q6IFU7,Q6IMF3                                           |
| 4185 | 1,3,5,8,26, 2,4,6,7,25,<br>29,31,32 27,28,30 | 1 Q80WL1                                                         |
| 4186 | 1,3,5,8,26, 2,4,6,7,25,<br>30,31,32 27,28,29 | 2 O88797,Q63617                                                  |
| 4187 | 1,3,5,8,27, 2,4,6,7,25,<br>28,29,30 26,31,32 | 8 P19218,P47967,Q6IFU7,Q6IFW6,Q6IG02,Q6IMF3,Q6P6Q2,Q9WVH8        |
| 4188 | 1,3,5,8,27, 2,4,6,7,25,<br>28,29,31 26,30,32 | 3 D3ZUC6,Q80WL1,Q9R168                                           |
| 4189 | 1,3,5,8,27, 2,4,6,7,25,<br>28,29,32 26,30,31 | 3 P47967,Q80WL1,Q812E4                                           |
| 4190 | 1,3,5,8,27, 2,4,6,7,25,<br>28,30,31 26,29,32 | 8 P23739,Q6AYR8,Q6IFU7,Q6IFW6,Q6IG05,Q6IMF3,Q6P6Q2,Q9WVH8        |
| 4191 | 1,3,5,8,27, 2,4,6,7,25,<br>28,30,32 26,29,31 | 5 P19218,Q6IFU7,Q6IMF3,Q6P6Q2,Q9WVH8                             |
| 4192 | 1,3,5,8,27, 2,4,6,7,25,<br>28,31,32 26,29,30 | 2 P23739,Q80WL1                                                  |
| 4193 | 1,3,5,8,27, 2,4,6,7,25,<br>29,30,31 26,28,32 | 7 Q4FZU2,Q6IFU7,Q6IFW6,Q6IG02,Q6IG05,Q6IMF3,Q6P6Q2               |
| 4194 | 1,3,5,8,27, 2,4,6,7,25,<br>29,30,32 26,28,31 | 9 O88797,Q4FZU2,Q6IFU7,Q6IFW6,Q6IG02,Q6IG05,Q6IMF3,Q6P6Q2,Q9WVH8 |
| 4195 | 1,3,5,8,27, 2,4,6,7,25,<br>29,31,32 26,28,30 | 1 Q80WL1                                                         |
| 4196 | 1,3,5,8,27, 2,4,6,7,25,<br>30,31,32 26,28,29 | 8 P20646,P23739,Q4FZU2,Q6IFU7,Q6IFW6,Q6IG05,Q6IMF3,Q6P6Q2        |
| 4197 | 1,3,5,8,28, 2,4,6,7,25,<br>29,30,31 26,27,32 | 3 Q6IFU7,Q6IFW6,Q6IMF3                                           |

|      |                                              |                                                                          |
|------|----------------------------------------------|--------------------------------------------------------------------------|
| 4198 | 1,3,5,8,28, 2,4,6,7,25,<br>29,30,32 26,27,31 | 3 O88797,Q6IFU7,Q6IMF3                                                   |
| 4199 | 1,3,5,8,28, 2,4,6,7,25,<br>29,31,32 26,27,30 | 2 P21588,Q80WL1                                                          |
| 4200 | 1,3,5,8,28, 2,4,6,7,25,<br>30,31,32 26,27,29 | 0                                                                        |
| 4201 | 1,3,5,8,29, 2,4,6,7,25,<br>30,31,32 26,27,28 | 6 O88797,P63081,Q6IFU7,Q6IFW6,Q6IMF3,Q6P6Q2                              |
| 4202 | 1,3,5,25,2 2,4,6,7,8,3<br>6,27,28,29 0,31,32 | 6 O54858,P00714,P15999,P26342,P82471,Q63532                              |
| 4203 | 1,3,5,25,2 2,4,6,7,8,2<br>6,27,28,30 9,31,32 | 4 O55004,P00714,P80299,P82471                                            |
| 4204 | 1,3,5,25,2 2,4,6,7,8,2<br>6,27,28,31 9,30,32 | 5 O55145,P00714,P02631,P62804,Q99041                                     |
| 4205 | 1,3,5,25,2 2,4,6,7,8,2<br>6,27,28,32 9,30,31 | 4 P12020,P62804,P82471,Q5RJR2                                            |
| 4206 | 1,3,5,25,2 2,4,6,7,8,2<br>6,27,29,30 8,31,32 | 7 P02631,P11598,P12020,P22006,P82471,Q63532,Q63617                       |
| 4207 | 1,3,5,25,2 2,4,6,7,8,2<br>6,27,29,31 8,30,32 | 3 P02631,Q63617,Q99041                                                   |
| 4208 | 1,3,5,25,2 2,4,6,7,8,2<br>6,27,29,32 8,30,31 | 5 P07171,P12020,P82471,Q63532,Q99041                                     |
| 4209 | 1,3,5,25,2 2,4,6,7,8,2<br>6,27,30,31 8,29,32 | 10 P00714,P02631,P02780,P11598,P22273,P22282,P30120,P62804,Q63617,Q99041 |
| 4210 | 1,3,5,25,2 2,4,6,7,8,2<br>6,27,30,32 8,29,31 | 7 P11598,P12020,P21674,P22273,P62804,P82471,Q63617                       |
| 4211 | 1,3,5,25,2 2,4,6,7,8,2<br>6,27,31,32 8,29,30 | 7 P02631,P22273,P23739,P62804,Q63617,Q80WL1,Q99041                       |
| 4212 | 1,3,5,25,2 2,4,6,7,8,2<br>6,28,29,30 7,31,32 | 7 P00714,P22273,P22282,P80299,P82471,Q63532,Q6TMA8                       |
| 4213 | 1,3,5,25,2 2,4,6,7,8,2<br>6,28,29,31 7,30,32 | 6 P00714,P02631,P22273,P22282,Q01205,Q99041                              |
| 4214 | 1,3,5,25,2 2,4,6,7,8,2<br>6,28,29,32 7,30,31 | 4 P22273,P82471,Q63532,Q99041                                            |
| 4215 | 1,3,5,25,2 2,4,6,7,8,2<br>6,28,30,31 7,29,32 | 10 P00714,P02631,P11598,P22273,P22282,P25809,P62804,Q4G075,Q6TMA8,Q99041 |
| 4216 | 1,3,5,25,2 2,4,6,7,8,2<br>6,28,30,32 7,29,31 | 9 P19223,P22273,P50115,P62804,P80299,P82471,Q00715,Q4G075,Q62975         |
| 4217 | 1,3,5,25,2 2,4,6,7,8,2<br>6,28,31,32 7,29,30 | 7 P19223,P22273,P62804,Q00715,Q4G075,Q80WL1,Q99041                       |



|      |                                              |    |                                                                                                                                      |
|------|----------------------------------------------|----|--------------------------------------------------------------------------------------------------------------------------------------|
| 4218 | 1,3,5,25,2 2,4,6,7,8,2<br>6,29,30,31 7,28,32 | 12 | P00714,P02631,P05964,P06761,P11598,P22273,P22282,P25809,P50280,Q63617,Q6AYR9,Q99041                                                  |
| 4219 | 1,3,5,25,2 2,4,6,7,8,2<br>6,29,30,32 7,28,31 | 11 | P06761,P11598,P12020,P22273,P22282,P50115,P82471,Q4G075,Q63532,Q63617,Q99041                                                         |
| 4220 | 1,3,5,25,2 2,4,6,7,8,2<br>6,29,31,32 7,28,30 | 10 | P02631,P11598,P19218,P22273,P22282,P62804,Q4G075,Q63617,Q80WL1,Q99041                                                                |
| 4221 | 1,3,5,25,2 2,4,6,7,8,2<br>6,30,31,32 7,28,29 | 15 | P02631,P06761,P11598,P22273,P22282,P22283,P25809,P47727,P50115,P62804,Q00715,Q4G075,Q63617,Q812E4,Q99041                             |
| 4222 | 1,3,5,25,2 2,4,6,7,8,2<br>7,28,29,30 6,31,32 | 5  | O54858,O55004,P20766,P82471,Q63532                                                                                                   |
| 4223 | 1,3,5,25,2 2,4,6,7,8,2<br>7,28,29,31 6,30,32 | 5  | O55004,P02631,P20762,Q80WL1,Q99041                                                                                                   |
| 4224 | 1,3,5,25,2 2,4,6,7,8,2<br>7,28,29,32 6,30,31 | 7  | O54858,P20762,P82471,Q62761,Q62762,Q62763,Q63532,Q6AY61,Q80WL1                                                                       |
| 4225 | 1,3,5,25,2 2,4,6,7,8,2<br>7,28,30,31 6,29,32 | 5  | O55004,P00714,P02631,P22273,P23739                                                                                                   |
| 4226 | 1,3,5,25,2 2,4,6,7,8,2<br>7,28,30,32 6,29,31 | 3  | P22273,P82471,Q9QX74                                                                                                                 |
| 4227 | 1,3,5,25,2 2,4,6,7,8,2<br>7,28,31,32 6,29,30 | 6  | P20762,P22273,P23739,P62804,Q80WL1,Q99041                                                                                            |
| 4228 | 1,3,5,25,2 2,4,6,7,8,2<br>7,29,30,31 6,28,32 | 13 | O54728,O55004,P02631,P07150,P08649,P11598,P20762,P22273,P22282,Q63617,Q6IFW6,Q6IG02,Q99041                                           |
| 4229 | 1,3,5,25,2 2,4,6,7,8,2<br>7,29,30,32 6,28,31 | 8  | P07150,P11598,P12020,P20762,P22273,P82471,Q63532,Q63617                                                                              |
| 4230 | 1,3,5,25,2 2,4,6,7,8,2<br>7,29,31,32 6,28,30 | 8  | P02631,P07150,P08649,P20762,P22273,P62804,Q80WL1,Q99041                                                                              |
| 4231 | 1,3,5,25,2 2,4,6,7,8,2<br>7,30,31,32 6,28,29 | 16 | P02631,P06761,P07150,P08649,P11598,P20762,P21674,P22273,P23739,P62804,Q00715,Q63617,Q6P6R2,Q99041,Q9QX74,Q9WTT6                      |
| 4232 | 1,3,5,25,2 2,4,6,7,8,2<br>8,29,30,31 6,27,32 | 10 | O55004,P00714,P02631,P11598,P20762,P22273,P22282,P50115,P50280,Q99041                                                                |
| 4233 | 1,3,5,25,2 2,4,6,7,8,2<br>8,29,30,32 6,27,31 | 7  | P20762,P20766,P22273,P50115,Q5BJY9,Q62894,Q62975                                                                                     |
| 4234 | 1,3,5,25,2 2,4,6,7,8,2<br>8,29,31,32 6,27,30 | 6  | P20762,P22273,P50115,P62804,Q80WL1,Q99041                                                                                            |
| 4235 | 1,3,5,25,2 2,4,6,7,8,2<br>8,30,31,32 6,27,29 | 13 | P20762,P22273,P22282,P25809,P50115,P62804,Q00715,Q4G075,Q5BJY9,Q62975,Q99041,Q9QX74,Q9WTT6                                           |
| 4236 | 1,3,5,25,2 2,4,6,7,8,2<br>9,30,31,32 6,27,28 | 19 | P02631,P06761,P07150,P08649,P11598,P17559,P20762,P22273,P22282,P25809,P50115,P50116,P50280,P62804,Q4G075,Q5BJY9,Q63617,Q99041,Q9WTT6 |
| 4237 | 1,3,5,26,2 2,4,6,7,8,2<br>7,28,29,30 5,31,32 | 7  | O54858,O55004,P02631,P12020,P47967,P82471,Q63532                                                                                     |

|      |                                              |                                                                                                      |
|------|----------------------------------------------|------------------------------------------------------------------------------------------------------|
| 4238 | 1,3,5,26,2 2,4,6,7,8,2<br>7,28,29,31 5,30,32 | 3 O54858,P02631,Q01205                                                                               |
| 4239 | 1,3,5,26,2 2,4,6,7,8,2<br>7,28,29,32 5,30,31 | 6 O54858,P02631,P12020,P47967,P82471,Q63532                                                          |
| 4240 | 1,3,5,26,2 2,4,6,7,8,2<br>7,28,30,31 5,29,32 | 2 P00714,P02631                                                                                      |
| 4241 | 1,3,5,26,2 2,4,6,7,8,2<br>7,28,30,32 5,29,31 | 3 P02631,P12020,P82471                                                                               |
| 4242 | 1,3,5,26,2 2,4,6,7,8,2<br>7,28,31,32 5,29,30 | 2 P02631,P62804                                                                                      |
| 4243 | 1,3,5,26,2 2,4,6,7,8,2<br>7,29,30,31 5,28,32 | 7 P02454,P02631,P08649,P11598,P22273,P22282,Q63617                                                   |
| 4244 | 1,3,5,26,2 2,4,6,7,8,2<br>7,29,30,32 5,28,31 | 7 O54858,P02631,P06911,P12020,P22273,P82471,Q63532                                                   |
| 4245 | 1,3,5,26,2 2,4,6,7,8,2<br>7,29,31,32 5,28,30 | 3 P02631,P22273,P62804                                                                               |
| 4246 | 1,3,5,26,2 2,4,6,7,8,2<br>7,30,31,32 5,28,29 | 7 P02631,P08649,P12020,P22273,P62804,Q00715,Q63617                                                   |
| 4247 | 1,3,5,26,2 2,4,6,7,8,2<br>8,29,30,31 5,27,32 | 7 P00714,P02631,P22273,P22282,P50115,Q4G075,Q6TMA8                                                   |
| 4248 | 1,3,5,26,2 2,4,6,7,8,2<br>8,29,30,32 5,27,31 | 8 O54858,P02631,P12020,P22273,P50115,P82471,Q4G075,Q62894                                            |
| 4249 | 1,3,5,26,2 2,4,6,7,8,2<br>8,29,31,32 5,27,30 | 6 P02631,P22273,P50115,P62804,Q4G075,Q99041                                                          |
| 4250 | 1,3,5,26,2 2,4,6,7,8,2<br>8,30,31,32 5,27,29 | 8 P02631,P22273,P22282,P25809,P50115,P62804,Q00715,Q4G075                                            |
| 4251 | 1,3,5,26,2 2,4,6,7,8,2<br>9,30,31,32 5,27,28 | 14 P02631,P06761,P06911,P08649,P0C0A9,P11598,P22273,P22282,P36860,P50115,P62804,Q4G075,Q63617,Q99041 |
| 4252 | 1,3,5,27,2 2,4,6,7,8,2<br>8,29,30,31 5,26,32 | 5 O54858,O55004,P02631,P08649,Q9WVH8                                                                 |
| 4253 | 1,3,5,27,2 2,4,6,7,8,2<br>8,29,30,32 5,26,31 | 7 O54858,P02631,P08649,P12020,P20766,Q63532,Q9WVH8                                                   |
| 4254 | 1,3,5,27,2 2,4,6,7,8,2<br>8,29,31,32 5,26,30 | 5 O54858,P02631,P08649,P20762,Q80WL1                                                                 |
| 4255 | 1,3,5,27,2 2,4,6,7,8,2<br>8,30,31,32 5,26,29 | 7 P02631,P08649,P22273,P23739,P62804,Q9QX74,Q9WVH8                                                   |
| 4256 | 1,3,5,27,2 2,4,6,7,8,2<br>9,30,31,32 5,26,28 | 6 P02631,P07150,P08649,P20762,P22273,Q9WTT6                                                          |
| 4257 | 1,3,5,28,2 2,4,6,7,8,2<br>9,30,31,32 5,26,27 | 10 P02631,P08649,P17559,P20762,P22273,P50115,P50116,Q4G075,Q5BJY9,Q9WTT6                             |

|      |                        |                          |   |                                           |
|------|------------------------|--------------------------|---|-------------------------------------------|
| 4258 | 1,3,6,7,8,2<br>5,26,27 | 2,4,5,28,2<br>9,30,31,32 | 2 | P63081,P70549                             |
| 4259 | 1,3,6,7,8,2<br>5,26,28 | 2,4,5,27,2<br>9,30,31,32 | 5 | P06911,P70549,P80299,Q63598,Q9QW07        |
| 4260 | 1,3,6,7,8,2<br>5,26,29 | 2,4,5,27,2<br>8,30,31,32 | 2 | P70549,Q9QX74                             |
| 4261 | 1,3,6,7,8,2<br>5,26,30 | 2,4,5,27,2<br>8,29,31,32 | 2 | O70417,P80299                             |
| 4262 | 1,3,6,7,8,2<br>5,26,31 | 2,4,5,27,2<br>8,29,30,32 | 3 | P57113,P70549,Q63598                      |
| 4263 | 1,3,6,7,8,2<br>5,26,32 | 2,4,5,27,2<br>8,29,30,31 | 2 | P13432,P57113                             |
| 4264 | 1,3,6,7,8,2<br>5,27,28 | 2,4,5,26,2<br>9,30,31,32 | 6 | O70417,P06911,P19629,P36860,P63081,Q9QW07 |
| 4265 | 1,3,6,7,8,2<br>5,27,29 | 2,4,5,26,2<br>8,30,31,32 | 2 | P06911,P70549                             |
| 4266 | 1,3,6,7,8,2<br>5,27,30 | 2,4,5,26,2<br>8,29,31,32 | 2 | O70417,Q6IFW6                             |
| 4267 | 1,3,6,7,8,2<br>5,27,31 | 2,4,5,26,2<br>8,29,30,32 | 2 | P06911,Q62894                             |
| 4268 | 1,3,6,7,8,2<br>5,27,32 | 2,4,5,26,2<br>8,29,30,31 | 2 | P01681,P98166                             |
| 4269 | 1,3,6,7,8,2<br>5,28,29 | 2,4,5,26,2<br>7,30,31,32 | 4 | P06911,P21674,P70549,Q9QW07               |
| 4270 | 1,3,6,7,8,2<br>5,28,30 | 2,4,5,26,2<br>7,29,31,32 | 3 | O70417,P06911,Q9QW07                      |
| 4271 | 1,3,6,7,8,2<br>5,28,31 | 2,4,5,26,2<br>7,29,30,32 | 4 | P06911,Q63598,Q811M5,Q9QW07               |
| 4272 | 1,3,6,7,8,2<br>5,28,32 | 2,4,5,26,2<br>7,29,30,31 | 2 | P06911,Q9QW07                             |
| 4273 | 1,3,6,7,8,2<br>5,29,30 | 2,4,5,26,2<br>7,28,31,32 | 2 | O70417,Q6IFW6                             |
| 4274 | 1,3,6,7,8,2<br>5,29,31 | 2,4,5,26,2<br>7,28,30,32 | 2 | P06911,P70549                             |
| 4275 | 1,3,6,7,8,2<br>5,29,32 | 2,4,5,26,2<br>7,28,30,31 | 1 | P13432                                    |
| 4276 | 1,3,6,7,8,2<br>5,30,31 | 2,4,5,26,2<br>7,28,29,32 | 2 | O70417,P06911                             |
| 4277 | 1,3,6,7,8,2<br>5,30,32 | 2,4,5,26,2<br>7,28,29,31 | 3 | O70417,P01681,P35280                      |

|      |                        |                          |    |                                                                                     |
|------|------------------------|--------------------------|----|-------------------------------------------------------------------------------------|
| 4278 | 1,3,6,7,8,2<br>5,31,32 | 2,4,5,26,2<br>7,28,29,30 | 3  | P01681,P21588,P57113                                                                |
| 4279 | 1,3,6,7,8,2<br>6,27,28 | 2,4,5,25,2<br>9,30,31,32 | 5  | D3ZUC6,P63081,P70549,Q9QW07,Q9WTT6                                                  |
| 4280 | 1,3,6,7,8,2<br>6,27,29 | 2,4,5,25,2<br>8,30,31,32 | 4  | P02783,P20759,P70549,Q9QX74                                                         |
| 4281 | 1,3,6,7,8,2<br>6,27,30 | 2,4,5,25,2<br>8,29,31,32 | 2  | O70417,P02783                                                                       |
| 4282 | 1,3,6,7,8,2<br>6,27,31 | 2,4,5,25,2<br>8,29,30,32 | 2  | P70549,Q62894                                                                       |
| 4283 | 1,3,6,7,8,2<br>6,27,32 | 2,4,5,25,2<br>8,29,30,31 | 0  |                                                                                     |
| 4284 | 1,3,6,7,8,2<br>6,28,29 | 2,4,5,25,2<br>7,30,31,32 | 8  | D3ZUC6,P20759,P21674,P70549,Q6P6R2,Q9QW07,Q9QX74,Q9QYP1                             |
| 4285 | 1,3,6,7,8,2<br>6,28,30 | 2,4,5,25,2<br>7,29,31,32 | 1  | Q9QW07                                                                              |
| 4286 | 1,3,6,7,8,2<br>6,28,31 | 2,4,5,25,2<br>7,29,30,32 | 3  | P57113,P70549,Q63598                                                                |
| 4287 | 1,3,6,7,8,2<br>6,28,32 | 2,4,5,25,2<br>7,29,30,31 | 2  | P57113,Q9QW07                                                                       |
| 4288 | 1,3,6,7,8,2<br>6,29,30 | 2,4,5,25,2<br>7,28,31,32 | 2  | P02783,P49134                                                                       |
| 4289 | 1,3,6,7,8,2<br>6,29,31 | 2,4,5,25,2<br>7,28,30,32 | 4  | P02783,P57113,P70549,Q9QX74                                                         |
| 4290 | 1,3,6,7,8,2<br>6,29,32 | 2,4,5,25,2<br>7,28,30,31 | 2  | P02783,P70549                                                                       |
| 4291 | 1,3,6,7,8,2<br>6,30,31 | 2,4,5,25,2<br>7,28,29,32 | 1  | P57113                                                                              |
| 4292 | 1,3,6,7,8,2<br>6,30,32 | 2,4,5,25,2<br>7,28,29,31 | 2  | O89117,P35280                                                                       |
| 4293 | 1,3,6,7,8,2<br>6,31,32 | 2,4,5,25,2<br>7,28,29,30 | 3  | O89117,P57113,Q62714                                                                |
| 4294 | 1,3,6,7,8,2<br>7,28,29 | 2,4,5,25,2<br>6,30,31,32 | 12 | D3ZUC6,P00507,P21674,P22283,P47967,P70549,Q63493,Q63617,Q812E4,Q9JI85,Q9QW07,Q9Z2L0 |
| 4295 | 1,3,6,7,8,2<br>7,28,30 | 2,4,5,25,2<br>6,29,31,32 | 4  | O70417,P19218,Q6P6S4,Q9QW07                                                         |
| 4296 | 1,3,6,7,8,2<br>7,28,31 | 2,4,5,25,2<br>6,29,30,32 | 3  | D3ZUC6,Q62894,Q9QZK9                                                                |
| 4297 | 1,3,6,7,8,2<br>7,28,32 | 2,4,5,25,2<br>6,29,30,31 | 7  | P08723,P22283,Q6AYR9,Q6P6S4,Q812E4,Q9JI85,Q9QW07                                    |

|      |                         |                          |   |                                                                |
|------|-------------------------|--------------------------|---|----------------------------------------------------------------|
| 4298 | 1,3,6,7,8,2<br>7,29,30  | 2,4,5,25,2<br>6,28,31,32 | 4 | P02783,P19218,Q6IFU7,Q6IFW6                                    |
| 4299 | 1,3,6,7,8,2<br>7,29,31  | 2,4,5,25,2<br>6,28,30,32 | 2 | P02783,P70549                                                  |
| 4300 | 1,3,6,7,8,2<br>7,29,32  | 2,4,5,25,2<br>6,28,30,31 | 1 | P02783                                                         |
| 4301 | 1,3,6,7,8,2<br>7,30,31  | 2,4,5,25,2<br>6,28,29,32 | 2 | P19218,Q9QZK9                                                  |
| 4302 | 1,3,6,7,8,2<br>7,30,32  | 2,4,5,25,2<br>6,28,29,31 | 3 | O70417,P19218,P35280                                           |
| 4303 | 1,3,6,7,8,2<br>7,31,32  | 2,4,5,25,2<br>6,28,29,30 | 2 | Q62714,Q9QZK9                                                  |
| 4304 | 1,3,6,7,8,2<br>8,29,30  | 2,4,5,25,2<br>6,27,31,32 | 2 | P21674,Q9QW07                                                  |
| 4305 | 1,3,6,7,8,2<br>8,29,31  | 2,4,5,25,2<br>6,27,30,32 | 5 | D3ZUC6,P21674,P70549,Q63493,Q9QW07                             |
| 4306 | 1,3,6,7,8,2<br>8,29,32  | 2,4,5,25,2<br>6,27,30,31 | 9 | P08723,P21674,P30120,Q63493,Q63617,Q812E4,Q9J185,Q9QW07,Q9QYP1 |
| 4307 | 1,3,6,7,8,2<br>8,30,31  | 2,4,5,25,2<br>6,27,29,32 | 0 |                                                                |
| 4308 | 1,3,6,7,8,2<br>8,30,32  | 2,4,5,25,2<br>6,27,29,31 | 3 | O89117,P35280,Q9QW07                                           |
| 4309 | 1,3,6,7,8,2<br>8,31,32  | 2,4,5,25,2<br>6,27,29,30 | 5 | O89117,P22006,P57113,Q811M5,Q9QZK9                             |
| 4310 | 1,3,6,7,8,2<br>9,30,31  | 2,4,5,25,2<br>6,27,28,32 | 1 | Q9QWN8                                                         |
| 4311 | 1,3,6,7,8,2<br>9,30,32  | 2,4,5,25,2<br>6,27,28,31 | 1 | P35280                                                         |
| 4312 | 1,3,6,7,8,2<br>9,31,32  | 2,4,5,25,2<br>6,27,28,30 | 2 | P21588,P70549                                                  |
| 4313 | 1,3,6,7,8,3<br>0,31,32  | 2,4,5,25,2<br>6,27,28,29 | 3 | O89117,P35280,Q9QZK9                                           |
| 4314 | 1,3,6,7,25,<br>26,27,28 | 2,4,5,8,29,<br>30,31,32  | 2 | P63081,P70549                                                  |
| 4315 | 1,3,6,7,25,<br>26,27,29 | 2,4,5,8,28,<br>30,31,32  | 3 | P05539,P63081,P70549                                           |
| 4316 | 1,3,6,7,25,<br>26,27,30 | 2,4,5,8,28,<br>29,31,32  | 0 |                                                                |
| 4317 | 1,3,6,7,25,<br>26,27,31 | 2,4,5,8,28,<br>29,30,32  | 2 | P70549,Q62894                                                  |

|      |                                              |                                      |
|------|----------------------------------------------|--------------------------------------|
| 4318 | 1,3,6,7,25, 2,4,5,8,28,<br>26,27,32 29,30,31 | 0                                    |
| 4319 | 1,3,6,7,25, 2,4,5,8,27,<br>26,28,29 30,31,32 | 3 P05539,P70549,Q9QW07               |
| 4320 | 1,3,6,7,25, 2,4,5,8,27,<br>26,28,30 29,31,32 | 2 Q5PQL7,Q62975                      |
| 4321 | 1,3,6,7,25, 2,4,5,8,27,<br>26,28,31 29,30,32 | 3 P57113,P70549,Q63598               |
| 4322 | 1,3,6,7,25, 2,4,5,8,27,<br>26,28,32 29,30,31 | 3 P00731,Q5PQL7,Q62975               |
| 4323 | 1,3,6,7,25, 2,4,5,8,27,<br>26,29,30 28,31,32 | 0                                    |
| 4324 | 1,3,6,7,25, 2,4,5,8,27,<br>26,29,31 28,30,32 | 2 P57113,P70549                      |
| 4325 | 1,3,6,7,25, 2,4,5,8,27,<br>26,29,32 28,30,31 | 1 P70549                             |
| 4326 | 1,3,6,7,25, 2,4,5,8,27,<br>26,30,31 28,29,32 | 2 P25809,P57113                      |
| 4327 | 1,3,6,7,25, 2,4,5,8,27,<br>26,30,32 28,29,31 | 3 P25809,Q5PQL7,Q62975               |
| 4328 | 1,3,6,7,25, 2,4,5,8,27,<br>26,31,32 28,29,30 | 3 P25809,P51792;P51794;P51796,P57113 |
| 4329 | 1,3,6,7,25, 2,4,5,8,26,<br>27,28,29 30,31,32 | 3 P05539,P63081,P70549               |
| 4330 | 1,3,6,7,25, 2,4,5,8,26,<br>27,28,30 29,31,32 | 0                                    |
| 4331 | 1,3,6,7,25, 2,4,5,8,26,<br>27,28,31 29,30,32 | 0                                    |
| 4332 | 1,3,6,7,25, 2,4,5,8,26,<br>27,28,32 29,30,31 | 2 Q5RJR2,Q62761;Q62762;Q62763        |
| 4333 | 1,3,6,7,25, 2,4,5,8,26,<br>27,29,30 28,31,32 | 1 O54728                             |
| 4334 | 1,3,6,7,25, 2,4,5,8,26,<br>27,29,31 28,30,32 | 3 O54728,P05539,P70549               |
| 4335 | 1,3,6,7,25, 2,4,5,8,26,<br>27,29,32 28,30,31 | 0                                    |
| 4336 | 1,3,6,7,25, 2,4,5,8,26,<br>27,30,31 28,29,32 | 1 O54728                             |
| 4337 | 1,3,6,7,25, 2,4,5,8,26,<br>27,30,32 28,29,31 | 0                                    |

|      |                                              |                               |
|------|----------------------------------------------|-------------------------------|
| 4338 | 1,3,6,7,25, 2,4,5,8,26,<br>27,31,32 28,29,30 | 0                             |
| 4339 | 1,3,6,7,25, 2,4,5,8,26,<br>28,29,30 27,31,32 | 2 P05539,Q62975               |
| 4340 | 1,3,6,7,25, 2,4,5,8,26,<br>28,29,31 27,30,32 | 3 P05539,P20762,P70549        |
| 4341 | 1,3,6,7,25, 2,4,5,8,26,<br>28,29,32 27,30,31 | 4 P05539,P20762,Q62975,Q9QW07 |
| 4342 | 1,3,6,7,25, 2,4,5,8,26,<br>28,30,31 27,29,32 | 3 P25809,Q62975,Q9JJS8        |
| 4343 | 1,3,6,7,25, 2,4,5,8,26,<br>28,30,32 27,29,31 | 3 P25809,Q5PQL7,Q62975        |
| 4344 | 1,3,6,7,25, 2,4,5,8,26,<br>28,31,32 27,29,30 | 3 P20762,P25809,Q62975        |
| 4345 | 1,3,6,7,25, 2,4,5,8,26,<br>29,30,31 27,28,32 | 3 O54728,P25809,Q9QWN8        |
| 4346 | 1,3,6,7,25, 2,4,5,8,26,<br>29,30,32 27,28,31 | 1 Q5BJY9                      |
| 4347 | 1,3,6,7,25, 2,4,5,8,26,<br>29,31,32 27,28,30 | 3 P20762,P25809,P70549        |
| 4348 | 1,3,6,7,25, 2,4,5,8,26,<br>30,31,32 27,28,29 | 4 P06760,P25809,Q62975,Q6P6R2 |
| 4349 | 1,3,6,7,26, 2,4,5,8,25,<br>27,28,29 30,31,32 | 4 P05539,P47967,P63081,P70549 |
| 4350 | 1,3,6,7,26, 2,4,5,8,25,<br>27,28,30 29,31,32 | 0                             |
| 4351 | 1,3,6,7,26, 2,4,5,8,25,<br>27,28,31 29,30,32 | 1 P70549                      |
| 4352 | 1,3,6,7,26, 2,4,5,8,25,<br>27,28,32 29,30,31 | 0                             |
| 4353 | 1,3,6,7,26, 2,4,5,8,25,<br>27,29,30 28,31,32 | 2 P02783,Q811M5               |
| 4354 | 1,3,6,7,26, 2,4,5,8,25,<br>27,29,31 28,30,32 | 2 P02783,P70549               |
| 4355 | 1,3,6,7,26, 2,4,5,8,25,<br>27,29,32 28,30,31 | 2 P02783,P70549               |
| 4356 | 1,3,6,7,26, 2,4,5,8,25,<br>27,30,31 28,29,32 | 0                             |
| 4357 | 1,3,6,7,26, 2,4,5,8,25,<br>27,30,32 28,29,31 | 0                             |

|      |                                              |                                                           |
|------|----------------------------------------------|-----------------------------------------------------------|
| 4358 | 1,3,6,7,26, 2,4,5,8,25,<br>27,31,32 28,29,30 | 0                                                         |
| 4359 | 1,3,6,7,26, 2,4,5,8,25,<br>28,29,30 27,31,32 | 2 P01835,P23739                                           |
| 4360 | 1,3,6,7,26, 2,4,5,8,25,<br>28,29,31 27,30,32 | 4 P01835,P21674,P70549,Q01205                             |
| 4361 | 1,3,6,7,26, 2,4,5,8,25,<br>28,29,32 27,30,31 | 2 P01835,P70549                                           |
| 4362 | 1,3,6,7,26, 2,4,5,8,25,<br>28,30,31 27,29,32 | 0                                                         |
| 4363 | 1,3,6,7,26, 2,4,5,8,25,<br>28,30,32 27,29,31 | 1 Q62975                                                  |
| 4364 | 1,3,6,7,26, 2,4,5,8,25,<br>28,31,32 27,29,30 | 3 P22006,P57113,P70549                                    |
| 4365 | 1,3,6,7,26, 2,4,5,8,25,<br>29,30,31 27,28,32 | 2 P01835,Q9QWN8                                           |
| 4366 | 1,3,6,7,26, 2,4,5,8,25,<br>29,30,32 27,28,31 | 1 P01835                                                  |
| 4367 | 1,3,6,7,26, 2,4,5,8,25,<br>29,31,32 27,28,30 | 3 P01835,P57113,P70549                                    |
| 4368 | 1,3,6,7,26, 2,4,5,8,25,<br>30,31,32 27,28,29 | 3 P22006,P25809,P57113                                    |
| 4369 | 1,3,6,7,27, 2,4,5,8,25,<br>28,29,30 26,31,32 | 2 P00507,P05539                                           |
| 4370 | 1,3,6,7,27, 2,4,5,8,25,<br>28,29,31 26,30,32 | 3 P00507,P05539,P70549                                    |
| 4371 | 1,3,6,7,27, 2,4,5,8,25,<br>28,29,32 26,30,31 | 6 O35547,P05539,P22283,Q62761;Q62762;Q62763,Q6AY61,Q812E4 |
| 4372 | 1,3,6,7,27, 2,4,5,8,25,<br>28,30,31 26,29,32 | 0                                                         |
| 4373 | 1,3,6,7,27, 2,4,5,8,25,<br>28,30,32 26,29,31 | 0                                                         |
| 4374 | 1,3,6,7,27, 2,4,5,8,25,<br>28,31,32 26,29,30 | 1 P22006                                                  |
| 4375 | 1,3,6,7,27, 2,4,5,8,25,<br>29,30,31 26,28,32 | 1 O54728                                                  |
| 4376 | 1,3,6,7,27, 2,4,5,8,25,<br>29,30,32 26,28,31 | 0                                                         |
| 4377 | 1,3,6,7,27, 2,4,5,8,25,<br>29,31,32 26,28,30 | 0                                                         |



|      |                                              |                                                           |
|------|----------------------------------------------|-----------------------------------------------------------|
| 4378 | 1,3,6,7,27, 2,4,5,8,25,<br>30,31,32 26,28,29 | 2 P06760,P22006                                           |
| 4379 | 1,3,6,7,28, 2,4,5,8,25,<br>29,30,31 26,27,32 | 1 P01835                                                  |
| 4380 | 1,3,6,7,28, 2,4,5,8,25,<br>29,30,32 26,27,31 | 2 P01835,Q5BJY9                                           |
| 4381 | 1,3,6,7,28, 2,4,5,8,25,<br>29,31,32 26,27,30 | 3 P01835,P20762,P70549                                    |
| 4382 | 1,3,6,7,28, 2,4,5,8,25,<br>30,31,32 26,27,29 | 3 P06760,P22006,P25809                                    |
| 4383 | 1,3,6,7,29, 2,4,5,8,25,<br>30,31,32 26,27,28 | 5 P01835,P25809,P26342,P36860,Q5BJY9                      |
| 4384 | 1,3,6,8,25, 2,4,5,7,29,<br>26,27,28 30,31,32 | 8 P08649,P15399,P26342,P36860,P63081,P70549,P80299,Q9QW07 |
| 4385 | 1,3,6,8,25, 2,4,5,7,28,<br>26,27,29 30,31,32 | 1 P70549                                                  |
| 4386 | 1,3,6,8,25, 2,4,5,7,28,<br>26,27,30 29,31,32 | 2 P15399,P80299                                           |
| 4387 | 1,3,6,8,25, 2,4,5,7,28,<br>26,27,31 29,30,32 | 3 P54921,P70549,Q9R168                                    |
| 4388 | 1,3,6,8,25, 2,4,5,7,28,<br>26,27,32 29,30,31 | 3 P13432,P15399,Q06000                                    |
| 4389 | 1,3,6,8,25, 2,4,5,7,27,<br>26,28,29 30,31,32 | 4 P70549,P80299,Q9QW07,Q9Z0J6                             |
| 4390 | 1,3,6,8,25, 2,4,5,7,27,<br>26,28,30 29,31,32 | 2 P80299,Q6TMA8                                           |
| 4391 | 1,3,6,8,25, 2,4,5,7,27,<br>26,28,31 29,30,32 | 2 P70549,Q63598                                           |
| 4392 | 1,3,6,8,25, 2,4,5,7,27,<br>26,28,32 29,30,31 | 4 P08649,P13432,P80299,Q9QW07                             |
| 4393 | 1,3,6,8,25, 2,4,5,7,27,<br>26,29,30 28,31,32 | 2 P80299,Q9Z0J6                                           |
| 4394 | 1,3,6,8,25, 2,4,5,7,27,<br>26,29,31 28,30,32 | 1 P70549                                                  |
| 4395 | 1,3,6,8,25, 2,4,5,7,27,<br>26,29,32 28,30,31 | 3 P13432,P70549,Q9Z0J6                                    |
| 4396 | 1,3,6,8,25, 2,4,5,7,27,<br>26,30,31 28,29,32 | 1 P54921                                                  |
| 4397 | 1,3,6,8,25, 2,4,5,7,27,<br>26,30,32 28,29,31 | 2 P80299,Q06000                                           |

|      |                                              |                               |
|------|----------------------------------------------|-------------------------------|
| 4398 | 1,3,6,8,25, 2,4,5,7,27,<br>26,31,32 28,29,30 | 3 P00507,P13432,P70549        |
| 4399 | 1,3,6,8,25, 2,4,5,7,26,<br>27,28,29 30,31,32 | 4 P36860,P70549,Q812E4,Q9QW07 |
| 4400 | 1,3,6,8,25, 2,4,5,7,26,<br>27,28,30 29,31,32 | 1 O70417                      |
| 4401 | 1,3,6,8,25, 2,4,5,7,26,<br>27,28,31 29,30,32 | 1 Q9R168                      |
| 4402 | 1,3,6,8,25, 2,4,5,7,26,<br>27,28,32 29,30,31 | 4 P36860,Q6AYR9,Q9QW07,Q9QWN8 |
| 4403 | 1,3,6,8,25, 2,4,5,7,26,<br>27,29,30 28,31,32 | 3 Q6IFU7,Q6IFW6,Q6IG02        |
| 4404 | 1,3,6,8,25, 2,4,5,7,26,<br>27,29,31 28,30,32 | 2 P70549,Q9R168               |
| 4405 | 1,3,6,8,25, 2,4,5,7,26,<br>27,29,32 28,30,31 | 1 P98166                      |
| 4406 | 1,3,6,8,25, 2,4,5,7,26,<br>27,30,31 28,29,32 | 1 P54921                      |
| 4407 | 1,3,6,8,25, 2,4,5,7,26,<br>27,30,32 28,29,31 | 1 P01681                      |
| 4408 | 1,3,6,8,25, 2,4,5,7,26,<br>27,31,32 28,29,30 | 2 P01681,Q80WL1               |
| 4409 | 1,3,6,8,25, 2,4,5,7,26,<br>28,29,30 27,31,32 | 3 P80299,Q9QW07,Q9Z0J6        |
| 4410 | 1,3,6,8,25, 2,4,5,7,26,<br>28,29,31 27,30,32 | 2 P70549,Q9R168               |
| 4411 | 1,3,6,8,25, 2,4,5,7,26,<br>28,29,32 27,30,31 | 2 Q9QW07,Q9Z0J6               |
| 4412 | 1,3,6,8,25, 2,4,5,7,26,<br>28,30,31 27,29,32 | 0                             |
| 4413 | 1,3,6,8,25, 2,4,5,7,26,<br>28,30,32 27,29,31 | 1 Q62975                      |
| 4414 | 1,3,6,8,25, 2,4,5,7,26,<br>28,31,32 27,29,30 | 2 P21588,Q80WL1               |
| 4415 | 1,3,6,8,25, 2,4,5,7,26,<br>29,30,31 27,28,32 | 0                             |
| 4416 | 1,3,6,8,25, 2,4,5,7,26,<br>29,30,32 27,28,31 | 2 O88797,Q9Z0J6               |
| 4417 | 1,3,6,8,25, 2,4,5,7,26,<br>29,31,32 27,28,30 | 3 P21588,P70549,Q80WL1        |

|      |                                              |                                      |
|------|----------------------------------------------|--------------------------------------|
| 4418 | 1,3,6,8,25, 2,4,5,7,26,<br>30,31,32 27,28,29 | 5 P01681,P02625,P20646,P21588,P47967 |
| 4419 | 1,3,6,8,26, 2,4,5,7,25,<br>27,28,29 30,31,32 | 4 P26342,P70549,Q6P6R2,Q9QW07        |
| 4420 | 1,3,6,8,26, 2,4,5,7,25,<br>27,28,30 29,31,32 | 1 P15399                             |
| 4421 | 1,3,6,8,26, 2,4,5,7,25,<br>27,28,31 29,30,32 | 2 P70549,Q9R168                      |
| 4422 | 1,3,6,8,26, 2,4,5,7,25,<br>27,28,32 29,30,31 | 4 P15399,Q6AYR9,Q6P6S4,Q9QWN8        |
| 4423 | 1,3,6,8,26, 2,4,5,7,25,<br>27,29,30 28,31,32 | 2 P02783,Q811M5                      |
| 4424 | 1,3,6,8,26, 2,4,5,7,25,<br>27,29,31 28,30,32 | 3 P02783,P70549,Q9R168               |
| 4425 | 1,3,6,8,26, 2,4,5,7,25,<br>27,29,32 28,30,31 | 2 P02783,P70549                      |
| 4426 | 1,3,6,8,26, 2,4,5,7,25,<br>27,30,31 28,29,32 | 0                                    |
| 4427 | 1,3,6,8,26, 2,4,5,7,25,<br>27,30,32 28,29,31 | 1 P15399                             |
| 4428 | 1,3,6,8,26, 2,4,5,7,25,<br>27,31,32 28,29,30 | 0                                    |
| 4429 | 1,3,6,8,26, 2,4,5,7,25,<br>28,29,30 27,31,32 | 1 P80299                             |
| 4430 | 1,3,6,8,26, 2,4,5,7,25,<br>28,29,31 27,30,32 | 3 P21674,P70549,Q9R168               |
| 4431 | 1,3,6,8,26, 2,4,5,7,25,<br>28,29,32 27,30,31 | 3 P70549,Q9QW07,Q9QYP1               |
| 4432 | 1,3,6,8,26, 2,4,5,7,25,<br>28,30,31 27,29,32 | 2 O89117,Q6TMA8                      |
| 4433 | 1,3,6,8,26, 2,4,5,7,25,<br>28,30,32 27,29,31 | 1 O89117                             |
| 4434 | 1,3,6,8,26, 2,4,5,7,25,<br>28,31,32 27,29,30 | 3 O89117,P22006,P70549               |
| 4435 | 1,3,6,8,26, 2,4,5,7,25,<br>29,30,31 27,28,32 | 0                                    |
| 4436 | 1,3,6,8,26, 2,4,5,7,25,<br>29,30,32 27,28,31 | 0                                    |
| 4437 | 1,3,6,8,26, 2,4,5,7,25,<br>29,31,32 27,28,30 | 1 P70549                             |

|      |                                              |                                             |
|------|----------------------------------------------|---------------------------------------------|
| 4438 | 1,3,6,8,26, 2,4,5,7,25,<br>30,31,32 27,28,29 | 1 O89117                                    |
| 4439 | 1,3,6,8,27, 2,4,5,7,25,<br>28,29,30 26,31,32 | 3 P19218,Q6IFU7,Q6P6S4                      |
| 4440 | 1,3,6,8,27, 2,4,5,7,25,<br>28,29,31 26,30,32 | 2 P70549,Q9R168                             |
| 4441 | 1,3,6,8,27, 2,4,5,7,25,<br>28,29,32 26,30,31 | 6 O35547,Q6AYR9,Q6P6S4,Q812E4,Q9JI85,Q9QW07 |
| 4442 | 1,3,6,8,27, 2,4,5,7,25,<br>28,30,31 26,29,32 | 0                                           |
| 4443 | 1,3,6,8,27, 2,4,5,7,25,<br>28,30,32 26,29,31 | 2 Q6P6S4,Q8VD89                             |
| 4444 | 1,3,6,8,27, 2,4,5,7,25,<br>28,31,32 26,29,30 | 2 P22006,Q9QZK9                             |
| 4445 | 1,3,6,8,27, 2,4,5,7,25,<br>29,30,31 26,28,32 | 1 Q6IG02                                    |
| 4446 | 1,3,6,8,27, 2,4,5,7,25,<br>29,30,32 26,28,31 | 1 Q6IFU7                                    |
| 4447 | 1,3,6,8,27, 2,4,5,7,25,<br>29,31,32 26,28,30 | 0                                           |
| 4448 | 1,3,6,8,27, 2,4,5,7,25,<br>30,31,32 26,28,29 | 2 P20646,Q9QZK9                             |
| 4449 | 1,3,6,8,28, 2,4,5,7,25,<br>29,30,31 26,27,32 | 0                                           |
| 4450 | 1,3,6,8,28, 2,4,5,7,25,<br>29,30,32 26,27,31 | 0                                           |
| 4451 | 1,3,6,8,28, 2,4,5,7,25,<br>29,31,32 26,27,30 | 2 P21588,P70549                             |
| 4452 | 1,3,6,8,28, 2,4,5,7,25,<br>30,31,32 26,27,29 | 2 O89117,P22006                             |
| 4453 | 1,3,6,8,29, 2,4,5,7,25,<br>30,31,32 26,27,28 | 0                                           |
| 4454 | 1,3,6,25,2 2,4,5,7,8,3<br>6,27,28,29 0,31,32 | 4 P05539,P63081,P70549,P82471               |
| 4455 | 1,3,6,25,2 2,4,5,7,8,2<br>6,27,28,30 9,31,32 | 1 P82471                                    |
| 4456 | 1,3,6,25,2 2,4,5,7,8,2<br>6,27,28,31 9,30,32 | 2 P62804,P70549                             |
| 4457 | 1,3,6,25,2 2,4,5,7,8,2<br>6,27,28,32 9,30,31 | 3 P62804,P82471,Q5RJR2                      |

|      |                                              |                                                           |
|------|----------------------------------------------|-----------------------------------------------------------|
| 4458 | 1,3,6,25,2 2,4,5,7,8,2<br>6,27,29,30 8,31,32 | 2 P82471,Q811M5                                           |
| 4459 | 1,3,6,25,2 2,4,5,7,8,2<br>6,27,29,31 8,30,32 | 1 P70549                                                  |
| 4460 | 1,3,6,25,2 2,4,5,7,8,2<br>6,27,29,32 8,30,31 | 2 P70549,P82471                                           |
| 4461 | 1,3,6,25,2 2,4,5,7,8,2<br>6,27,30,31 8,29,32 | 4 P01946,P06760,P54921,P62804                             |
| 4462 | 1,3,6,25,2 2,4,5,7,8,2<br>6,27,30,32 8,29,31 | 4 P06760,P62804,P82471,Q06000                             |
| 4463 | 1,3,6,25,2 2,4,5,7,8,2<br>6,27,31,32 8,29,30 | 2 P06760,P62804                                           |
| 4464 | 1,3,6,25,2 2,4,5,7,8,2<br>6,28,29,30 7,31,32 | 3 P82471,Q6TMA8,Q9Z0J6                                    |
| 4465 | 1,3,6,25,2 2,4,5,7,8,2<br>6,28,29,31 7,30,32 | 3 P70549,Q01205,Q6TMA8                                    |
| 4466 | 1,3,6,25,2 2,4,5,7,8,2<br>6,28,29,32 7,30,31 | 3 P00731,P70549,P82471                                    |
| 4467 | 1,3,6,25,2 2,4,5,7,8,2<br>6,28,30,31 7,29,32 | 7 P00714,P01946,P06760,P25809,P62804,Q4G075,Q6TMA8        |
| 4468 | 1,3,6,25,2 2,4,5,7,8,2<br>6,28,30,32 7,29,31 | 8 P06760,P25809,P62804,P82471,Q06000,Q4G075,Q5PQL7,Q62975 |
| 4469 | 1,3,6,25,2 2,4,5,7,8,2<br>6,28,31,32 7,29,30 | 7 P00731,P06760,P25809,P62804,P70549,Q4G075,Q62975        |
| 4470 | 1,3,6,25,2 2,4,5,7,8,2<br>6,29,30,31 7,28,32 | 4 P01946,P22282,P25809,Q4G075                             |
| 4471 | 1,3,6,25,2 2,4,5,7,8,2<br>6,29,30,32 7,28,31 | 3 P50116,P82471,Q4G075                                    |
| 4472 | 1,3,6,25,2 2,4,5,7,8,2<br>6,29,31,32 7,28,30 | 5 P19218,P25809,P62804,P70549,Q4G075                      |
| 4473 | 1,3,6,25,2 2,4,5,7,8,2<br>6,30,31,32 7,28,29 | 8 P00507,P06760,P22273,P25809,P47967,P62804,Q00715,Q4G075 |
| 4474 | 1,3,6,25,2 2,4,5,7,8,2<br>7,28,29,30 6,31,32 | 2 P05539,P82471                                           |
| 4475 | 1,3,6,25,2 2,4,5,7,8,2<br>7,28,29,31 6,30,32 | 3 P05539,P20762,P70549                                    |
| 4476 | 1,3,6,25,2 2,4,5,7,8,2<br>7,28,29,32 6,30,31 | 6 P00758,P05539,P20762,P82471,Q5RJR2,Q62761;Q62762;Q62763 |
| 4477 | 1,3,6,25,2 2,4,5,7,8,2<br>7,28,30,31 6,29,32 | 1 P06760                                                  |

|      |                                              |                                                                                 |
|------|----------------------------------------------|---------------------------------------------------------------------------------|
| 4478 | 1,3,6,25,2 2,4,5,7,8,2<br>7,28,30,32 6,29,31 | 3 P06760,P82471,Q9QX74                                                          |
| 4479 | 1,3,6,25,2 2,4,5,7,8,2<br>7,28,31,32 6,29,30 | 6 P06760,P20762,P22006,P62804,Q5RJR2,Q9QX74                                     |
| 4480 | 1,3,6,25,2 2,4,5,7,8,2<br>7,29,30,31 6,28,32 | 2 O54728,P20762                                                                 |
| 4481 | 1,3,6,25,2 2,4,5,7,8,2<br>7,29,30,32 6,28,31 | 3 P20762,P82471,Q5RLM2                                                          |
| 4482 | 1,3,6,25,2 2,4,5,7,8,2<br>7,29,31,32 6,28,30 | 2 P20762,P62804                                                                 |
| 4483 | 1,3,6,25,2 2,4,5,7,8,2<br>7,30,31,32 6,28,29 | 8 P06760,P20646,P20762,P62804,Q00715,Q6P6R2,Q9QX74,Q9WTT6                       |
| 4484 | 1,3,6,25,2 2,4,5,7,8,2<br>8,29,30,31 6,27,32 | 4 P20762,P25809,P50116,Q4G075                                                   |
| 4485 | 1,3,6,25,2 2,4,5,7,8,2<br>8,29,30,32 6,27,31 | 6 P20762,P50116,P82471,Q4G075,Q5BJY9,Q62975                                     |
| 4486 | 1,3,6,25,2 2,4,5,7,8,2<br>8,29,31,32 6,27,30 | 5 P20762,P50116,P62804,P70549,Q4G075                                            |
| 4487 | 1,3,6,25,2 2,4,5,7,8,2<br>8,30,31,32 6,27,29 | 11 P06760,P20762,P22006,P25809,P50116,P62804,Q00715,Q4G075,Q62975,Q9QX74,Q9WTT6 |
| 4488 | 1,3,6,25,2 2,4,5,7,8,2<br>9,30,31,32 6,27,28 | 10 P07150,P20762,P22273,P25809,P50116,P62804,Q4G075,Q5BJY9,Q5RLM2,Q9WTT6        |
| 4489 | 1,3,6,26,2 2,4,5,7,8,2<br>7,28,29,30 5,31,32 | 3 P09656,P82471,Q811M5                                                          |
| 4490 | 1,3,6,26,2 2,4,5,7,8,2<br>7,28,29,31 5,30,32 | 3 P05539,P70549,Q01205                                                          |
| 4491 | 1,3,6,26,2 2,4,5,7,8,2<br>7,28,29,32 5,30,31 | 4 P00758,P09656,P70549,P82471                                                   |
| 4492 | 1,3,6,26,2 2,4,5,7,8,2<br>7,28,30,31 5,29,32 | 1 P06760                                                                        |
| 4493 | 1,3,6,26,2 2,4,5,7,8,2<br>7,28,30,32 5,29,31 | 4 P06760,P62804,P82471,Q8VD89                                                   |
| 4494 | 1,3,6,26,2 2,4,5,7,8,2<br>7,28,31,32 5,29,30 | 3 P06760,P22006,P62804                                                          |
| 4495 | 1,3,6,26,2 2,4,5,7,8,2<br>7,29,30,31 5,28,32 | 2 P39069,Q811M5                                                                 |
| 4496 | 1,3,6,26,2 2,4,5,7,8,2<br>7,29,30,32 5,28,31 | 2 P82471,Q811M5                                                                 |
| 4497 | 1,3,6,26,2 2,4,5,7,8,2<br>7,29,31,32 5,28,30 | 2 P62804,P70549                                                                 |

|      |                                              |                                                                  |
|------|----------------------------------------------|------------------------------------------------------------------|
| 4498 | 1,3,6,26,2 2,4,5,7,8,2<br>7,30,31,32 5,28,29 | 5 P06760,P22006,P39069,P62804,Q00715                             |
| 4499 | 1,3,6,26,2 2,4,5,7,8,2<br>8,29,30,31 5,27,32 | 3 P50116,Q4G075,Q6TMA8                                           |
| 4500 | 1,3,6,26,2 2,4,5,7,8,2<br>8,29,30,32 5,27,31 | 4 P50115,P50116,P82471,Q4G075                                    |
| 4501 | 1,3,6,26,2 2,4,5,7,8,2<br>8,29,31,32 5,27,30 | 3 P62804,P70549,Q4G075                                           |
| 4502 | 1,3,6,26,2 2,4,5,7,8,2<br>8,30,31,32 5,27,29 | 9 O89117,P06760,P22006,P25809,P50115,P50116,P62804,Q00715,Q4G075 |
| 4503 | 1,3,6,26,2 2,4,5,7,8,2<br>9,30,31,32 5,27,28 | 6 P25809,P36860,P50115,P50116,P62804,Q4G075                      |
| 4504 | 1,3,6,27,2 2,4,5,7,8,2<br>8,29,30,31 5,26,32 | 0                                                                |
| 4505 | 1,3,6,27,2 2,4,5,7,8,2<br>8,29,30,32 5,26,31 | 3 P00758,P82471,Q9Z0V6                                           |
| 4506 | 1,3,6,27,2 2,4,5,7,8,2<br>8,29,31,32 5,26,30 | 2 P20762,P22006                                                  |
| 4507 | 1,3,6,27,2 2,4,5,7,8,2<br>8,30,31,32 5,26,29 | 6 P06760,P22006,P62804,Q8VD89,Q9QX74,Q9WTT6                      |
| 4508 | 1,3,6,27,2 2,4,5,7,8,2<br>9,30,31,32 5,26,28 | 3 P07150,P20762,Q9WTT6                                           |
| 4509 | 1,3,6,28,2 2,4,5,7,8,2<br>9,30,31,32 5,26,27 | 7 P20762,P22006,P50115,P50116,Q4G075,Q5BJY9,Q9WTT6               |
| 4510 | 1,3,7,8,25, 2,4,5,6,29,<br>26,27,28 30,31,32 | 4 O55145,P26342,P36860,Q9WTT6                                    |
| 4511 | 1,3,7,8,25, 2,4,5,6,28,<br>26,27,29 30,31,32 | 4 P22006,P70549,Q9QX74,Q9WTT6                                    |
| 4512 | 1,3,7,8,25, 2,4,5,6,28,<br>26,27,30 29,31,32 | 2 O70417,Q05511                                                  |
| 4513 | 1,3,7,8,25, 2,4,5,6,28,<br>26,27,31 29,30,32 | 1 O55145                                                         |
| 4514 | 1,3,7,8,25, 2,4,5,6,28,<br>26,27,32 29,30,31 | 1 P01681                                                         |
| 4515 | 1,3,7,8,25, 2,4,5,6,27,<br>26,28,29 30,31,32 | 9 P01039,P20646,P70549,P80299,Q64093,Q6P6R2,Q9QX74,Q9WTT6,Q9Z0J6 |
| 4516 | 1,3,7,8,25, 2,4,5,6,27,<br>26,28,30 29,31,32 | 2 P01039,P80299                                                  |
| 4517 | 1,3,7,8,25, 2,4,5,6,27,<br>26,28,31 29,30,32 | 6 O55145,P01039,P70549,Q63598,Q811M5,Q923V8                      |

|      |                                              |                                      |
|------|----------------------------------------------|--------------------------------------|
| 4518 | 1,3,7,8,25, 2,4,5,6,27,<br>26,28,32 29,30,31 | 2 P01039,Q923V8                      |
| 4519 | 1,3,7,8,25, 2,4,5,6,27,<br>26,29,30 28,31,32 | 4 P01039,P22006,P80299,Q9Z0J6        |
| 4520 | 1,3,7,8,25, 2,4,5,6,27,<br>26,29,31 28,30,32 | 4 P01039,P70549,Q64093,Q9QX74        |
| 4521 | 1,3,7,8,25, 2,4,5,6,27,<br>26,29,32 28,30,31 | 1 P01039                             |
| 4522 | 1,3,7,8,25, 2,4,5,6,27,<br>26,30,31 28,29,32 | 0                                    |
| 4523 | 1,3,7,8,25, 2,4,5,6,27,<br>26,30,32 28,29,31 | 2 P01681,P35280                      |
| 4524 | 1,3,7,8,25, 2,4,5,6,27,<br>26,31,32 28,29,30 | 3 P01681,P21588,Q923V8               |
| 4525 | 1,3,7,8,25, 2,4,5,6,26,<br>27,28,29 30,31,32 | 4 P36860,Q812E4,Q9EQS0,Q9Z2L0        |
| 4526 | 1,3,7,8,25, 2,4,5,6,26,<br>27,28,30 29,31,32 | 2 O70417,P36860                      |
| 4527 | 1,3,7,8,25, 2,4,5,6,26,<br>27,28,31 29,30,32 | 2 O55145,P36860                      |
| 4528 | 1,3,7,8,25, 2,4,5,6,26,<br>27,28,32 29,30,31 | 5 P01681,P36860,Q5RJR2,Q6AYR9,Q812E4 |
| 4529 | 1,3,7,8,25, 2,4,5,6,26,<br>27,29,30 28,31,32 | 3 P22006,Q6IFW6,Q6IG02               |
| 4530 | 1,3,7,8,25, 2,4,5,6,26,<br>27,29,31 28,30,32 | 0                                    |
| 4531 | 1,3,7,8,25, 2,4,5,6,26,<br>27,29,32 28,30,31 | 1 P01681                             |
| 4532 | 1,3,7,8,25, 2,4,5,6,26,<br>27,30,31 28,29,32 | 2 Q05511,Q6IFW6                      |
| 4533 | 1,3,7,8,25, 2,4,5,6,26,<br>27,30,32 28,29,31 | 5 O70417,P01681,P35280,Q05511,Q6IFW6 |
| 4534 | 1,3,7,8,25, 2,4,5,6,26,<br>27,31,32 28,29,30 | 3 P01681,P21588,Q80WL1               |
| 4535 | 1,3,7,8,25, 2,4,5,6,26,<br>28,29,30 27,31,32 | 2 P01039,Q9Z0J6                      |
| 4536 | 1,3,7,8,25, 2,4,5,6,26,<br>28,29,31 27,30,32 | 4 P01039,P21588,P70549,Q811M5        |
| 4537 | 1,3,7,8,25, 2,4,5,6,26,<br>28,29,32 27,30,31 | 4 P01039,P30120,Q812E4,Q9Z0J6        |



|      |                                              |                                                           |
|------|----------------------------------------------|-----------------------------------------------------------|
| 4538 | 1,3,7,8,25, 2,4,5,6,26,<br>28,30,31 27,29,32 | 2 P01039,Q9JJ50                                           |
| 4539 | 1,3,7,8,25, 2,4,5,6,26,<br>28,30,32 27,29,31 | 4 P01039,P01681,P35280,Q62975                             |
| 4540 | 1,3,7,8,25, 2,4,5,6,26,<br>28,31,32 27,29,30 | 6 P01039,P01681,P21588,Q80WL1,Q811M5,Q923V8               |
| 4541 | 1,3,7,8,25, 2,4,5,6,26,<br>29,30,31 27,28,32 | 2 P01039,Q6IFW6                                           |
| 4542 | 1,3,7,8,25, 2,4,5,6,26,<br>29,30,32 27,28,31 | 3 P01039,P01681,P35280                                    |
| 4543 | 1,3,7,8,25, 2,4,5,6,26,<br>29,31,32 27,28,30 | 4 P01039,P01681,P21588,Q80WL1                             |
| 4544 | 1,3,7,8,25, 2,4,5,6,26,<br>30,31,32 27,28,29 | 4 P01681,P02625,P21588,P35280                             |
| 4545 | 1,3,7,8,26, 2,4,5,6,25,<br>27,28,29 30,31,32 | 8 P20646,P47967,P70549,Q64093,Q6P6R2,Q812E4,Q9QX74,Q9WTT6 |
| 4546 | 1,3,7,8,26, 2,4,5,6,25,<br>27,28,30 29,31,32 | 1 Q9WTT6                                                  |
| 4547 | 1,3,7,8,26, 2,4,5,6,25,<br>27,28,31 29,30,32 | 3 O55145,Q63598,Q9WTT6                                    |
| 4548 | 1,3,7,8,26, 2,4,5,6,25,<br>27,28,32 29,30,31 | 2 Q6AYR9,Q9QWN8                                           |
| 4549 | 1,3,7,8,26, 2,4,5,6,25,<br>27,29,30 28,31,32 | 0                                                         |
| 4550 | 1,3,7,8,26, 2,4,5,6,25,<br>27,29,31 28,30,32 | 2 P70549,Q9QX74                                           |
| 4551 | 1,3,7,8,26, 2,4,5,6,25,<br>27,29,32 28,30,31 | 0                                                         |
| 4552 | 1,3,7,8,26, 2,4,5,6,25,<br>27,30,31 28,29,32 | 0                                                         |
| 4553 | 1,3,7,8,26, 2,4,5,6,25,<br>27,30,32 28,29,31 | 1 P35280                                                  |
| 4554 | 1,3,7,8,26, 2,4,5,6,25,<br>27,31,32 28,29,30 | 0                                                         |
| 4555 | 1,3,7,8,26, 2,4,5,6,25,<br>28,29,30 27,31,32 | 2 P01039,P21674                                           |
| 4556 | 1,3,7,8,26, 2,4,5,6,25,<br>28,29,31 27,30,32 | 7 P01039,P21674,P70549,Q63424,Q64093,Q6P6R2,Q9QX74        |
| 4557 | 1,3,7,8,26, 2,4,5,6,25,<br>28,29,32 27,30,31 | 4 P01039,P30120,P70549,Q64093                             |

|      |                                              |                                                    |
|------|----------------------------------------------|----------------------------------------------------|
| 4558 | 1,3,7,8,26, 2,4,5,6,25,<br>28,30,31 27,29,32 | 0                                                  |
| 4559 | 1,3,7,8,26, 2,4,5,6,25,<br>28,30,32 27,29,31 | 2 P01039,P35280                                    |
| 4560 | 1,3,7,8,26, 2,4,5,6,25,<br>28,31,32 27,29,30 | 3 P01039,Q811M5,Q923V8                             |
| 4561 | 1,3,7,8,26, 2,4,5,6,25,<br>29,30,31 27,28,32 | 0                                                  |
| 4562 | 1,3,7,8,26, 2,4,5,6,25,<br>29,30,32 27,28,31 | 2 P01039,P35280                                    |
| 4563 | 1,3,7,8,26, 2,4,5,6,25,<br>29,31,32 27,28,30 | 2 P70549,Q64093                                    |
| 4564 | 1,3,7,8,26, 2,4,5,6,25,<br>30,31,32 27,28,29 | 1 P35280                                           |
| 4565 | 1,3,7,8,27, 2,4,5,6,25,<br>28,29,30 26,31,32 | 3 P00507,P47967,Q812E4                             |
| 4566 | 1,3,7,8,27, 2,4,5,6,25,<br>28,29,31 26,30,32 | 4 D3ZUC6,P00507,Q812E4,Q9EQS0                      |
| 4567 | 1,3,7,8,27, 2,4,5,6,25,<br>28,29,32 26,30,31 | 7 P08723,P47727,P47967,Q6AYR9,Q812E4,Q9EQS0,Q9Z2L0 |
| 4568 | 1,3,7,8,27, 2,4,5,6,25,<br>28,30,31 26,29,32 | 0                                                  |
| 4569 | 1,3,7,8,27, 2,4,5,6,25,<br>28,30,32 26,29,31 | 2 P35280,Q6AYR9                                    |
| 4570 | 1,3,7,8,27, 2,4,5,6,25,<br>28,31,32 26,29,30 | 1 P21588                                           |
| 4571 | 1,3,7,8,27, 2,4,5,6,25,<br>29,30,31 26,28,32 | 2 Q6IFW6,Q6IG02                                    |
| 4572 | 1,3,7,8,27, 2,4,5,6,25,<br>29,30,32 26,28,31 | 1 P35280                                           |
| 4573 | 1,3,7,8,27, 2,4,5,6,25,<br>29,31,32 26,28,30 | 1 P21588                                           |
| 4574 | 1,3,7,8,27, 2,4,5,6,25,<br>30,31,32 26,28,29 | 1 P35280                                           |
| 4575 | 1,3,7,8,28, 2,4,5,6,25,<br>29,30,31 26,27,32 | 2 P01039,P21674                                    |
| 4576 | 1,3,7,8,28, 2,4,5,6,25,<br>29,30,32 26,27,31 | 2 P01039,P35280                                    |
| 4577 | 1,3,7,8,28, 2,4,5,6,25,<br>29,31,32 26,27,30 | 4 P01039,P21588,P21674,Q811M5                      |

|      |                                              |                                      |
|------|----------------------------------------------|--------------------------------------|
| 4578 | 1,3,7,8,28, 2,4,5,6,25,<br>30,31,32 26,27,29 | 2 P21588,P35280                      |
| 4579 | 1,3,7,8,29, 2,4,5,6,25,<br>30,31,32 26,27,28 | 2 P21588,P35280                      |
| 4580 | 1,3,7,25,2 2,4,5,6,8,3<br>6,27,28,29 0,31,32 | 4 O54858,P20646,P70549,Q63532        |
| 4581 | 1,3,7,25,2 2,4,5,6,8,2<br>6,27,28,30 9,31,32 | 0                                    |
| 4582 | 1,3,7,25,2 2,4,5,6,8,2<br>6,27,28,31 9,30,32 | 1 O55145                             |
| 4583 | 1,3,7,25,2 2,4,5,6,8,2<br>6,27,28,32 9,30,31 | 1 Q5RJR2                             |
| 4584 | 1,3,7,25,2 2,4,5,6,8,2<br>6,27,29,30 8,31,32 | 1 Q63532                             |
| 4585 | 1,3,7,25,2 2,4,5,6,8,2<br>6,27,29,31 8,30,32 | 1 P70549                             |
| 4586 | 1,3,7,25,2 2,4,5,6,8,2<br>6,27,29,32 8,30,31 | 2 O54858,Q63532                      |
| 4587 | 1,3,7,25,2 2,4,5,6,8,2<br>6,27,30,31 8,29,32 | 0                                    |
| 4588 | 1,3,7,25,2 2,4,5,6,8,2<br>6,27,30,32 8,29,31 | 0                                    |
| 4589 | 1,3,7,25,2 2,4,5,6,8,2<br>6,27,31,32 8,29,30 | 0                                    |
| 4590 | 1,3,7,25,2 2,4,5,6,8,2<br>6,28,29,30 7,31,32 | 2 P01039,Q63532                      |
| 4591 | 1,3,7,25,2 2,4,5,6,8,2<br>6,28,29,31 7,30,32 | 5 P01039,P19218,P70549,Q01205,Q64093 |
| 4592 | 1,3,7,25,2 2,4,5,6,8,2<br>6,28,29,32 7,30,31 | 4 O54858,P01039,P70549,Q63532        |
| 4593 | 1,3,7,25,2 2,4,5,6,8,2<br>6,28,30,31 7,29,32 | 2 P00714,Q62975                      |
| 4594 | 1,3,7,25,2 2,4,5,6,8,2<br>6,28,30,32 7,29,31 | 1 Q62975                             |
| 4595 | 1,3,7,25,2 2,4,5,6,8,2<br>6,28,31,32 7,29,30 | 4 P00731,P19218,Q10758,Q62975        |
| 4596 | 1,3,7,25,2 2,4,5,6,8,2<br>6,29,30,31 7,28,32 | 3 P22282,Q9QWN8,Q9QZQ5               |
| 4597 | 1,3,7,25,2 2,4,5,6,8,2<br>6,29,30,32 7,28,31 | 1 Q63532                             |

|      |                                              |                                                                                |
|------|----------------------------------------------|--------------------------------------------------------------------------------|
| 4598 | 1,3,7,25,2 2,4,5,6,8,2<br>6,29,31,32 7,28,30 | 2 P19218,P70549                                                                |
| 4599 | 1,3,7,25,2 2,4,5,6,8,2<br>6,30,31,32 7,28,29 | 3 P22273,P25809,Q00715                                                         |
| 4600 | 1,3,7,25,2 2,4,5,6,8,2<br>7,28,29,30 6,31,32 | 2 O54858,Q63532                                                                |
| 4601 | 1,3,7,25,2 2,4,5,6,8,2<br>7,28,29,31 6,30,32 | 1 P20762                                                                       |
| 4602 | 1,3,7,25,2 2,4,5,6,8,2<br>7,28,29,32 6,30,31 | 9 O54858,P00758,P20762,Q5RJR2,Q62761;Q62762;Q62763,Q63532,Q6AY61,Q812E4,Q8CGS4 |
| 4603 | 1,3,7,25,2 2,4,5,6,8,2<br>7,28,30,31 6,29,32 | 0                                                                              |
| 4604 | 1,3,7,25,2 2,4,5,6,8,2<br>7,28,30,32 6,29,31 | 1 Q5RJR2                                                                       |
| 4605 | 1,3,7,25,2 2,4,5,6,8,2<br>7,28,31,32 6,29,30 | 2 P20762,Q5RJR2                                                                |
| 4606 | 1,3,7,25,2 2,4,5,6,8,2<br>7,29,30,31 6,28,32 | 2 O54728,P08649                                                                |
| 4607 | 1,3,7,25,2 2,4,5,6,8,2<br>7,29,30,32 6,28,31 | 1 Q63532                                                                       |
| 4608 | 1,3,7,25,2 2,4,5,6,8,2<br>7,29,31,32 6,28,30 | 1 P20762                                                                       |
| 4609 | 1,3,7,25,2 2,4,5,6,8,2<br>7,30,31,32 6,28,29 | 0                                                                              |
| 4610 | 1,3,7,25,2 2,4,5,6,8,2<br>8,29,30,31 6,27,32 | 4 P01039,P17559,P20762,Q9JJ50                                                  |
| 4611 | 1,3,7,25,2 2,4,5,6,8,2<br>8,29,30,32 6,27,31 | 5 P01039,P17559,P20762,Q5BJY9,Q62975                                           |
| 4612 | 1,3,7,25,2 2,4,5,6,8,2<br>8,29,31,32 6,27,30 | 4 P01039,P17559,P20762,P21588                                                  |
| 4613 | 1,3,7,25,2 2,4,5,6,8,2<br>8,30,31,32 6,27,29 | 5 P17559,P20762,P25809,Q62975,Q9JJ50                                           |
| 4614 | 1,3,7,25,2 2,4,5,6,8,2<br>9,30,31,32 6,27,28 | 5 P08649,P17559,P20762,P25809,Q5BJY9                                           |
| 4615 | 1,3,7,26,2 2,4,5,6,8,2<br>7,28,29,30 5,31,32 | 3 O54858,P47967,Q63532                                                         |
| 4616 | 1,3,7,26,2 2,4,5,6,8,2<br>7,28,29,31 5,30,32 | 3 O54858,P70549,Q01205                                                         |
| 4617 | 1,3,7,26,2 2,4,5,6,8,2<br>7,28,29,32 5,30,31 | 4 O54858,P00758,P47967,Q63532                                                  |

|      |                                              |                                             |
|------|----------------------------------------------|---------------------------------------------|
| 4618 | 1,3,7,26,2 2,4,5,6,8,2<br>7,28,30,31 5,29,32 | 0                                           |
| 4619 | 1,3,7,26,2 2,4,5,6,8,2<br>7,28,30,32 5,29,31 | 0                                           |
| 4620 | 1,3,7,26,2 2,4,5,6,8,2<br>7,28,31,32 5,29,30 | 0                                           |
| 4621 | 1,3,7,26,2 2,4,5,6,8,2<br>7,29,30,31 5,28,32 | 2 P08649,Q9QZQ5                             |
| 4622 | 1,3,7,26,2 2,4,5,6,8,2<br>7,29,30,32 5,28,31 | 3 O54858,P36376,Q63532                      |
| 4623 | 1,3,7,26,2 2,4,5,6,8,2<br>7,29,31,32 5,28,30 | 0                                           |
| 4624 | 1,3,7,26,2 2,4,5,6,8,2<br>7,30,31,32 5,28,29 | 0                                           |
| 4625 | 1,3,7,26,2 2,4,5,6,8,2<br>8,29,30,31 5,27,32 | 3 P01039,P17559,Q9QZQ5                      |
| 4626 | 1,3,7,26,2 2,4,5,6,8,2<br>8,29,30,32 5,27,31 | 3 O54858,P01039,P17559                      |
| 4627 | 1,3,7,26,2 2,4,5,6,8,2<br>8,29,31,32 5,27,30 | 3 P01039,P17559,P70549                      |
| 4628 | 1,3,7,26,2 2,4,5,6,8,2<br>8,30,31,32 5,27,29 | 1 P17559                                    |
| 4629 | 1,3,7,26,2 2,4,5,6,8,2<br>9,30,31,32 5,27,28 | 2 P17559,Q9QZQ5                             |
| 4630 | 1,3,7,27,2 2,4,5,6,8,2<br>8,29,30,31 5,26,32 | 3 O54858,P00507,P08649                      |
| 4631 | 1,3,7,27,2 2,4,5,6,8,2<br>8,29,30,32 5,26,31 | 4 O54858,P00758,Q63150,Q63532               |
| 4632 | 1,3,7,27,2 2,4,5,6,8,2<br>8,29,31,32 5,26,30 | 3 O54858,P08649,P20762                      |
| 4633 | 1,3,7,27,2 2,4,5,6,8,2<br>8,30,31,32 5,26,29 | 1 P08649                                    |
| 4634 | 1,3,7,27,2 2,4,5,6,8,2<br>9,30,31,32 5,26,28 | 1 P08649                                    |
| 4635 | 1,3,7,28,2 2,4,5,6,8,2<br>9,30,31,32 5,26,27 | 4 P08649,P17559,P20762,Q5BJY9               |
| 4636 | 1,3,8,25,2 2,4,5,6,7,3<br>6,27,28,29 0,31,32 | 6 P26342,P36860,P70549,P80299,Q6P6R2,Q9Z0J6 |
| 4637 | 1,3,8,25,2 2,4,5,6,7,2<br>6,27,28,30 9,31,32 | 4 P00714,P26342,P36860,P80299               |

|      |                                              |                                                    |
|------|----------------------------------------------|----------------------------------------------------|
| 4638 | 1,3,8,25,2 2,4,5,6,7,2<br>6,27,28,31 9,30,32 | 5 O55145,P00714,P26342,P36860,Q80WL1               |
| 4639 | 1,3,8,25,2 2,4,5,6,7,2<br>6,27,28,32 9,30,31 | 6 P26342,P36860,Q5RJR2,Q6AYR9,Q80WL1,Q9QWN8        |
| 4640 | 1,3,8,25,2 2,4,5,6,7,2<br>6,27,29,30 8,31,32 | 4 P22006,P80299,Q6IFW6,Q9Z0J6                      |
| 4641 | 1,3,8,25,2 2,4,5,6,7,2<br>6,27,29,31 8,30,32 | 2 P70549,Q9Z0J6                                    |
| 4642 | 1,3,8,25,2 2,4,5,6,7,2<br>6,27,29,32 8,30,31 | 2 P00762,Q9Z0J6                                    |
| 4643 | 1,3,8,25,2 2,4,5,6,7,2<br>6,27,30,31 8,29,32 | 1 P54921                                           |
| 4644 | 1,3,8,25,2 2,4,5,6,7,2<br>6,27,30,32 8,29,31 | 1 P00762                                           |
| 4645 | 1,3,8,25,2 2,4,5,6,7,2<br>6,27,31,32 8,29,30 | 3 P00762,P01681,Q80WL1                             |
| 4646 | 1,3,8,25,2 2,4,5,6,7,2<br>6,28,29,30 7,31,32 | 5 P00714,P01039,P50116,P80299,Q9Z0J6               |
| 4647 | 1,3,8,25,2 2,4,5,6,7,2<br>6,28,29,31 7,30,32 | 6 P00714,P01039,P50116,P70549,Q80WL1,Q9Z0J6        |
| 4648 | 1,3,8,25,2 2,4,5,6,7,2<br>6,28,29,32 7,30,31 | 6 P01039,P50116,P70549,P80299,Q80WL1,Q9Z0J6        |
| 4649 | 1,3,8,25,2 2,4,5,6,7,2<br>6,28,30,31 7,29,32 | 6 O08839,P00714,P01039,P50116,P80299,Q6TMA8        |
| 4650 | 1,3,8,25,2 2,4,5,6,7,2<br>6,28,30,32 7,29,31 | 4 O08839,P01039,P50116,P80299                      |
| 4651 | 1,3,8,25,2 2,4,5,6,7,2<br>6,28,31,32 7,29,30 | 5 P01039,P21588,P50116,Q80WL1,Q923V8               |
| 4652 | 1,3,8,25,2 2,4,5,6,7,2<br>6,29,30,31 7,28,32 | 4 P01039,P11598,P50116,Q9Z0J6                      |
| 4653 | 1,3,8,25,2 2,4,5,6,7,2<br>6,29,30,32 7,28,31 | 5 O88797,P01039,P50116,P80299,Q9Z0J6               |
| 4654 | 1,3,8,25,2 2,4,5,6,7,2<br>6,29,31,32 7,28,30 | 7 P01039,P19218,P21588,P50116,P70549,Q80WL1,Q9Z0J6 |
| 4655 | 1,3,8,25,2 2,4,5,6,7,2<br>6,30,31,32 7,28,29 | 6 P00507,P01681,P11598,P50116,Q00715,Q63617        |
| 4656 | 1,3,8,25,2 2,4,5,6,7,2<br>7,28,29,30 6,31,32 | 4 Q6IFU7,Q6IFW6,Q9WVH8,Q9Z0J6                      |
| 4657 | 1,3,8,25,2 2,4,5,6,7,2<br>7,28,29,31 6,30,32 | 5 D3ZTX0,P70549,Q80WL1,Q9R168,Q9Z0J6               |

|      |                                              |                                             |
|------|----------------------------------------------|---------------------------------------------|
| 4658 | 1,3,8,25,2 2,4,5,6,7,2<br>7,28,29,32 6,30,31 | 6 P00758,P36860,Q6AYR9,Q80WL1,Q812E4,Q9Z0J6 |
| 4659 | 1,3,8,25,2 2,4,5,6,7,2<br>7,28,30,31 6,29,32 | 0                                           |
| 4660 | 1,3,8,25,2 2,4,5,6,7,2<br>7,28,30,32 6,29,31 | 2 P00762,P01681                             |
| 4661 | 1,3,8,25,2 2,4,5,6,7,2<br>7,28,31,32 6,29,30 | 4 P00762,P01681,P21588,Q80WL1               |
| 4662 | 1,3,8,25,2 2,4,5,6,7,2<br>7,29,30,31 6,28,32 | 3 Q6IFW6,Q6IG02,Q9Z0J6                      |
| 4663 | 1,3,8,25,2 2,4,5,6,7,2<br>7,29,30,32 6,28,31 | 3 P00762,Q6IFW6,Q9Z0J6                      |
| 4664 | 1,3,8,25,2 2,4,5,6,7,2<br>7,29,31,32 6,28,30 | 5 P00762,P01681,P21588,Q80WL1,Q9Z0J6        |
| 4665 | 1,3,8,25,2 2,4,5,6,7,2<br>7,30,31,32 6,28,29 | 4 P00762,P01681,P02625,P21588               |
| 4666 | 1,3,8,25,2 2,4,5,6,7,2<br>8,29,30,31 6,27,32 | 4 P01039,P50116,Q9JJ50,Q9Z0J6               |
| 4667 | 1,3,8,25,2 2,4,5,6,7,2<br>8,29,30,32 6,27,31 | 3 P01039,P50116,Q9Z0J6                      |
| 4668 | 1,3,8,25,2 2,4,5,6,7,2<br>8,29,31,32 6,27,30 | 5 P01039,P21588,P50116,Q80WL1,Q9Z0J6        |
| 4669 | 1,3,8,25,2 2,4,5,6,7,2<br>8,30,31,32 6,27,29 | 6 O08839,P01039,P01681,P21588,P50116,Q9JJ50 |
| 4670 | 1,3,8,25,2 2,4,5,6,7,2<br>9,30,31,32 6,27,28 | 6 P01039,P01681,P11598,P21588,P50116,Q9Z0J6 |
| 4671 | 1,3,8,26,2 2,4,5,6,7,2<br>7,28,29,30 5,31,32 | 0                                           |
| 4672 | 1,3,8,26,2 2,4,5,6,7,2<br>7,28,29,31 5,30,32 | 4 P26342,P70549,Q6P6R2,Q9R168               |
| 4673 | 1,3,8,26,2 2,4,5,6,7,2<br>7,28,29,32 5,30,31 | 5 P00758,P08010,Q6AYR9,Q812E4,Q9QWN8        |
| 4674 | 1,3,8,26,2 2,4,5,6,7,2<br>7,28,30,31 5,29,32 | 0                                           |
| 4675 | 1,3,8,26,2 2,4,5,6,7,2<br>7,28,30,32 5,29,31 | 1 Q9QWN8                                    |
| 4676 | 1,3,8,26,2 2,4,5,6,7,2<br>7,28,31,32 5,29,30 | 2 Q80WL1,Q9QWN8                             |
| 4677 | 1,3,8,26,2 2,4,5,6,7,2<br>7,29,30,31 5,28,32 | 0                                           |

|      |                                                  |                                                           |
|------|--------------------------------------------------|-----------------------------------------------------------|
| 4678 | 1,3,8,26,2 2,4,5,6,7,2<br>7,29,30,32 5,28,31     | 0                                                         |
| 4679 | 1,3,8,26,2 2,4,5,6,7,2<br>7,29,31,32 5,28,30     | 2 P70549,Q80WL1                                           |
| 4680 | 1,3,8,26,2 2,4,5,6,7,2<br>7,30,31,32 5,28,29     | 1 P00762                                                  |
| 4681 | 1,3,8,26,2 2,4,5,6,7,2<br>8,29,30,31 5,27,32     | 3 P01039,P50116,Q03191                                    |
| 4682 | 1,3,8,26,2 2,4,5,6,7,2<br>8,29,30,32 5,27,31     | 2 P01039,P50116                                           |
| 4683 | 1,3,8,26,2 2,4,5,6,7,2<br>8,29,31,32 5,27,30     | 4 P01039,P50116,P70549,Q80WL1                             |
| 4684 | 1,3,8,26,2 2,4,5,6,7,2<br>8,30,31,32 5,27,29     | 4 O08839,O89117,P01039,P50116                             |
| 4685 | 1,3,8,26,2 2,4,5,6,7,2<br>9,30,31,32 5,27,28     | 3 P01039,P50115,P50116                                    |
| 4686 | 1,3,8,27,2 2,4,5,6,7,2<br>8,29,30,31 5,26,32     | 1 Q9WVH8                                                  |
| 4687 | 1,3,8,27,2 2,4,5,6,7,2<br>8,29,30,32 5,26,31     | 4 Q63150,Q6AYR9,Q812E4,Q9WVH8                             |
| 4688 | 1,3,8,27,2 2,4,5,6,7,2<br>8,29,31,32 5,26,30     | 5 P21588,Q6AYR9,Q80WL1,Q812E4,Q9EQS0                      |
| 4689 | 1,3,8,27,2 2,4,5,6,7,2<br>8,30,31,32 5,26,29     | 1 Q9WVH8                                                  |
| 4690 | 1,3,8,27,2 2,4,5,6,7,2<br>9,30,31,32 5,26,28     | 1 P00762                                                  |
| 4691 | 1,3,8,28,2 2,4,5,6,7,2<br>9,30,31,32 5,26,27     | 4 P01039,P21588,P50115,P50116                             |
| 4692 | 1,3,25,26,<br>27,28,29,3 2,4,5,6,7,8<br>0 ,31,32 | 7 O54858,P00714,P02454,P82471,Q63532,Q9QZQ5,Q9Z0J6        |
| 4693 | 1,3,25,26,<br>27,28,29,3 2,4,5,6,7,8<br>1 ,30,32 | 8 O54858,P00714,P02454,P02631,P70549,Q01205,Q99041,Q9Z0J6 |
| 4694 | 1,3,25,26,<br>27,28,29,3 2,4,5,6,7,8<br>2 ,30,31 | 8 O54858,P00758,P82471,Q5RJR2,Q63532,Q8CGS4,Q99041,Q9Z0J6 |
| 4695 | 1,3,25,26,<br>27,28,30,3 2,4,5,6,7,8<br>1 ,29,32 | 5 P00714,P02631,P22273,P62804,Q99041                      |



|      |                               |                       |    |                                                                                                                     |
|------|-------------------------------|-----------------------|----|---------------------------------------------------------------------------------------------------------------------|
| 4696 | 1,3,25,26,<br>27,28,30,3<br>2 | 2,4,5,6,7,8<br>,29,31 | 5  | P22273,P62804,P82471,Q5RJR2,Q63532                                                                                  |
| 4697 | 1,3,25,26,<br>27,28,31,3<br>2 | 2,4,5,6,7,8<br>,29,30 | 5  | P22273,P62804,Q5RJR2,Q80WL1,Q99041                                                                                  |
| 4698 | 1,3,25,26,<br>27,29,30,3<br>1 | 2,4,5,6,7,8<br>,28,32 | 12 | O54858,P01946,P02454,P02631,P07171,P11598,P22273,P22282,Q63617,Q99041,Q9QZQ5,Q9Z<br>OJ6                             |
| 4699 | 1,3,25,26,<br>27,29,30,3<br>2 | 2,4,5,6,7,8<br>,28,31 | 8  | O54858,P07171,P22273,P50115,P82471,Q63532,Q99041,Q9Z0J6                                                             |
| 4700 | 1,3,25,26,<br>27,29,31,3<br>2 | 2,4,5,6,7,8<br>,28,30 | 8  | O54858,P02631,P07171,P19218,P22273,P62804,P70549,Q99041                                                             |
| 4701 | 1,3,25,26,<br>27,30,31,3<br>2 | 2,4,5,6,7,8<br>,28,29 | 13 | P00762,P02631,P06760,P06761,P07171,P11598,P21674,P22273,P50115,P62804,Q00715,Q6361<br>7,Q99041                      |
| 4702 | 1,3,25,26,<br>28,29,30,3<br>1 | 2,4,5,6,7,8<br>,27,32 | 15 | O54858,P00714,P01039,P02454,P02631,P22273,P22282,P50115,P50116,Q08163,Q4G075,Q6T<br>MA8,Q99041,Q9QZQ5,Q9Z0J6        |
| 4703 | 1,3,25,26,<br>28,29,30,3<br>2 | 2,4,5,6,7,8<br>,27,31 | 12 | O54858,P01039,P22273,P50115,P50116,P82471,Q4G075,Q62975,Q63532,Q99041,Q9QZQ5,Q9<br>Z0J6                             |
| 4704 | 1,3,25,26,<br>28,29,31,3<br>2 | 2,4,5,6,7,8<br>,27,30 | 14 | O54858,P00731,P01039,P19218,P22273,P50115,P50116,P62804,P70549,Q08163,Q4G075,Q80<br>WL1,Q99041,Q9Z0J6               |
| 4705 | 1,3,25,26,<br>28,30,31,3<br>2 | 2,4,5,6,7,8<br>,27,29 | 13 | O08839,P06760,P22273,P22282,P25809,P50115,P50116,P62804,Q00715,Q08163,Q4G075,Q629<br>75,Q99041                      |
| 4706 | 1,3,25,26,<br>29,30,31,3<br>2 | 2,4,5,6,7,8<br>,27,28 | 16 | P02631,P06761,P11598,P19218,P22273,P22282,P25809,P50115,P50116,P62804,Q00715,Q4G07<br>5,Q63617,Q99041,Q9QZQ5,Q9Z0J6 |
| 4707 | 1,3,25,27,<br>28,29,30,3<br>1 | 2,4,5,6,7,8<br>,26,32 | 9  | O54858,O55004,P02454,P02631,P20762,P22273,Q99041,Q9QZQ5,Q9Z0J6                                                      |
| 4708 | 1,3,25,27,<br>28,29,30,3<br>2 | 2,4,5,6,7,8<br>,26,31 | 11 | O54858,P00758,P20762,P20766,P22273,P50115,P82471,Q5RJR2,Q63532,Q9WVH8,Q9Z0J6                                        |

|      |                               |                               |    |                                                                                                                 |
|------|-------------------------------|-------------------------------|----|-----------------------------------------------------------------------------------------------------------------|
| 4709 | 1,3,25,27,<br>28,29,31,3<br>2 | 2,4,5,6,7,8<br>,26,30         | 8  | O54858,P20762,P22273,P62804,Q5RJR2,Q80WL1,Q99041,Q9Z0J6                                                         |
| 4710 | 1,3,25,27,<br>28,30,31,3<br>2 | 2,4,5,6,7,8<br>,26,29         | 9  | P06760,P13852,P20762,P22273,P50115,P62804,Q5RJR2,Q99041,Q9QX74                                                  |
| 4711 | 1,3,25,27,<br>29,30,31,3<br>2 | 2,4,5,6,7,8<br>,26,28         | 11 | O54858,P00762,P02631,P07150,P11598,P20762,P22273,P50115,P62804,Q5RLM2,Q99041                                    |
| 4712 | 1,3,25,28,<br>29,30,31,3<br>2 | 2,4,5,6,7,8<br>,26,27         | 16 | O54858,P01039,P07150,P17559,P20762,P21588,P22273,P22282,P25809,P50115,P50116,Q4G075,Q99041,Q9JJ50,Q9QZQ5,Q9Z0J6 |
| 4713 | 1,3,26,27,<br>28,29,30,3<br>1 | 2,4,5,6,7,8<br>,25,32         | 5  | O54858,P02454,P02631,P50115,Q9QZQ5                                                                              |
| 4714 | 1,3,26,27,<br>28,29,30,3<br>2 | 2,4,5,6,7,8<br>,25,31         | 7  | O54858,P00758,P02631,P50115,P82471,Q63532,Q9QZQ5                                                                |
| 4715 | 1,3,26,27,<br>28,29,31,3<br>2 | 2,4,5,6,7,8<br>,25,30         | 5  | O54858,P02631,P50115,P62804,P70549                                                                              |
| 4716 | 1,3,26,27,<br>28,30,31,3<br>2 | 2,4,5,6,7,8<br>,25,29         | 5  | P02631,P06760,P22273,P50115,P62804                                                                              |
| 4717 | 1,3,26,27,<br>29,30,31,3<br>2 | 2,4,5,6,7,8<br>,25,28         | 8  | O54858,P02454,P02631,P22273,P50115,P62804,Q99041,Q9QZQ5                                                         |
| 4718 | 1,3,26,28,<br>29,30,31,3<br>2 | 2,4,5,6,7,8<br>,25,27         | 11 | O54858,P01039,P02631,P17559,P22273,P50115,P50116,P62804,Q4G075,Q99041,Q9QZQ5                                    |
| 4719 | 1,3,27,28,<br>29,30,31,3<br>2 | 2,4,5,6,7,8<br>,25,26         | 9  | O54858,P02631,P08649,P13852,P20762,P22273,P50115,Q9QZQ5,Q9WVH8                                                  |
| 4720 | 1,4,5,6,7,8<br>,25,26         | 2,3,27,28,<br>29,30,31,3<br>2 | 6  | P06911,P13432,P22273,P49134,Q99041,Q9WVK7                                                                       |
| 4721 | 1,4,5,6,7,8<br>,25,27         | 2,3,26,28,<br>29,30,31,3<br>2 | 8  | P06911,P22273,P22282,P50115,P50116,Q03191,Q4G075,Q99041                                                         |

|      |                       |                               |    |                                                                                                                        |
|------|-----------------------|-------------------------------|----|------------------------------------------------------------------------------------------------------------------------|
| 4722 | 1,4,5,6,7,8<br>,25,28 | 2,3,26,27,<br>29,30,31,3<br>2 | 9  | P06761,P06911,P11598,P22273,P22282,P49134,Q63617,Q99041,Q9QW07                                                         |
| 4723 | 1,4,5,6,7,8<br>,25,29 | 2,3,26,27,<br>28,30,31,3<br>2 | 7  | P06760,P06911,P13432,P22273,P48032,P49134,Q99041                                                                       |
| 4724 | 1,4,5,6,7,8<br>,25,30 | 2,3,26,27,<br>28,29,31,3<br>2 | 8  | P06911,P19218,P49134,Q4FZU2,Q6IMF3,Q6P6Q2,Q99041,Q9WVK7                                                                |
| 4725 | 1,4,5,6,7,8<br>,25,31 | 2,3,26,27,<br>28,29,30,3<br>2 | 5  | O54858,P06911,P49134,Q99041,Q9WVK7                                                                                     |
| 4726 | 1,4,5,6,7,8<br>,25,32 | 2,3,26,27,<br>28,29,30,3<br>1 | 5  | P01681,P06911,P13432,Q99041,Q9WVK7                                                                                     |
| 4727 | 1,4,5,6,7,8<br>,26,27 | 2,3,25,28,<br>29,30,31,3<br>2 | 11 | P06761,P11598,P21588,P22273,P22282,P50115,P50116,Q03191,Q4G075,Q99041,Q9Z0J6                                           |
| 4728 | 1,4,5,6,7,8<br>,26,28 | 2,3,25,27,<br>29,30,31,3<br>2 | 14 | D3ZUC6,P00762,P06761,P06911,P07150,P11598,P21674,P22273,P22282,P49134,Q63617,Q99041,Q9JI85,Q9QW07                      |
| 4729 | 1,4,5,6,7,8<br>,26,29 | 2,3,25,27,<br>28,30,31,3<br>2 | 8  | P06760,P11598,P21674,P22273,P49134,Q5RJR2,Q99041,Q9QX74                                                                |
| 4730 | 1,4,5,6,7,8<br>,26,30 | 2,3,25,27,<br>28,29,31,3<br>2 | 4  | P49134,Q5RJR2,Q6P6Q2,Q99041                                                                                            |
| 4731 | 1,4,5,6,7,8<br>,26,31 | 2,3,25,27,<br>28,29,30,3<br>2 | 6  | P49134,P57113,Q5RJR2,Q63532,Q99041,Q9Z0J6                                                                              |
| 4732 | 1,4,5,6,7,8<br>,26,32 | 2,3,25,27,<br>28,29,30,3<br>1 | 6  | P11598,P13432,P18418,P22282,P49134,Q99041                                                                              |
| 4733 | 1,4,5,6,7,8<br>,27,28 | 2,3,25,26,<br>29,30,31,3<br>2 | 17 | D3ZUC6,P06761,P06911,P11598,P19218,P22273,P22282,P22283,P50115,P50116,Q03191,Q4G075,Q63617,Q99041,Q9JI85,Q9QW07,Q9Z0J6 |
| 4734 | 1,4,5,6,7,8<br>,27,29 | 2,3,25,26,<br>28,30,31,3<br>2 | 13 | P06760,P06761,P11598,P19218,P22273,P22282,P50115,P50116,Q03191,Q4G075,Q5I0D1,Q63617,Q99041                             |

|      |                        |                               |    |                                                                                                                               |
|------|------------------------|-------------------------------|----|-------------------------------------------------------------------------------------------------------------------------------|
| 4735 | 1,4,5,6,7,8<br>,27,30  | 2,3,25,26,<br>28,29,31,3<br>2 | 11 | P19218,P22273,P22282,P49744,P50116,Q03191,Q4FZU2,Q6IMF3,Q6P6Q2,Q99041,Q9Z0J6                                                  |
| 4736 | 1,4,5,6,7,8<br>,27,31  | 2,3,25,26,<br>28,29,30,3<br>2 | 11 | P06911,P11598,P19218,P22273,P22282,P23739,P50115,P50116,Q03191,Q99041,Q9Z0J6                                                  |
| 4737 | 1,4,5,6,7,8<br>,27,32  | 2,3,25,26,<br>28,29,30,3<br>1 | 9  | P00714,P11598,P19218,P22273,P22282,P50116,Q03191,Q99041,Q9Z0J6                                                                |
| 4738 | 1,4,5,6,7,8<br>,28,29  | 2,3,25,26,<br>27,30,31,3<br>2 | 18 | D3ZUC6,P00762,P06760,P06761,P06911,P11598,P19218,P21674,P22273,P22282,P22283,P49134,P97840,Q63493,Q63617,Q99041,Q9JI85,Q9QW07 |
| 4739 | 1,4,5,6,7,8<br>,28,30  | 2,3,25,26,<br>27,29,31,3<br>2 | 11 | P06911,P07171,P11598,P19218,P22273,P22282,P49134,Q63617,Q6P6Q2,Q99041,Q9QW07                                                  |
| 4740 | 1,4,5,6,7,8<br>,28,31  | 2,3,25,26,<br>27,29,30,3<br>2 | 14 | D3ZUC6,P06761,P06911,P07171,P11598,P21674,P22273,P22282,P49134,P82471,Q63532,Q63617,Q99041,Q9Z0J6                             |
| 4741 | 1,4,5,6,7,8<br>,28,32  | 2,3,25,26,<br>27,29,30,3<br>1 | 8  | P06761,P11598,P22273,P22282,Q63617,Q99041,Q9JI85,Q9QW07                                                                       |
| 4742 | 1,4,5,6,7,8<br>,29,30  | 2,3,25,26,<br>27,28,31,3<br>2 | 7  | P19218,P22273,P49134,Q5RJR2,Q6IMF3,Q6P6Q2,Q99041                                                                              |
| 4743 | 1,4,5,6,7,8<br>,29,31  | 2,3,25,26,<br>27,28,30,3<br>2 | 6  | P06911,P21674,P49134,P82471,Q5RJR2,Q99041                                                                                     |
| 4744 | 1,4,5,6,7,8<br>,29,32  | 2,3,25,26,<br>27,28,30,3<br>1 | 7  | P00714,P11598,P13432,P22273,P22282,P49134,Q99041                                                                              |
| 4745 | 1,4,5,6,7,8<br>,30,31  | 2,3,25,26,<br>27,28,29,3<br>2 | 8  | P19218,P49134,Q5RJR2,Q63532,Q6IMF3,Q6P6Q2,Q99041,Q9Z0J6                                                                       |
| 4746 | 1,4,5,6,7,8<br>,30,32  | 2,3,25,26,<br>27,28,29,3<br>1 | 5  | P19218,P49134,Q6IMF3,Q6P6Q2,Q99041                                                                                            |
| 4747 | 1,4,5,6,7,8<br>,31,32  | 2,3,25,26,<br>27,28,29,3<br>0 | 5  | P11598,P82471,Q63532,Q99041,Q9Z0J6                                                                                            |
| 4748 | 1,4,5,6,7,2<br>5,26,27 | 2,3,8,28,2<br>9,30,31,32      | 3  | P21588,P50116,Q03191                                                                                                          |

|      |                        |                          |                                                    |
|------|------------------------|--------------------------|----------------------------------------------------|
| 4749 | 1,4,5,6,7,2<br>5,26,28 | 2,3,8,27,2<br>9,30,31,32 | 3 P00762,P11598,Q5PQL7                             |
| 4750 | 1,4,5,6,7,2<br>5,26,29 | 2,3,8,27,2<br>8,30,31,32 | 0                                                  |
| 4751 | 1,4,5,6,7,2<br>5,26,30 | 2,3,8,27,2<br>8,29,31,32 | 4 P21588,Q5PQL7,Q9EQS0,Q9WVK7                      |
| 4752 | 1,4,5,6,7,2<br>5,26,31 | 2,3,8,27,2<br>8,29,30,32 | 3 P25809,Q63150,Q9WVK7                             |
| 4753 | 1,4,5,6,7,2<br>5,26,32 | 2,3,8,27,2<br>8,29,30,31 | 2 Q5PQL7,Q9WVK7                                    |
| 4754 | 1,4,5,6,7,2<br>5,27,28 | 2,3,8,26,2<br>9,30,31,32 | 3 P11598,P50116,Q03191                             |
| 4755 | 1,4,5,6,7,2<br>5,27,29 | 2,3,8,26,2<br>8,30,31,32 | 3 O89117,P50116,Q03191                             |
| 4756 | 1,4,5,6,7,2<br>5,27,30 | 2,3,8,26,2<br>8,29,31,32 | 3 P50116,Q03191,Q99376                             |
| 4757 | 1,4,5,6,7,2<br>5,27,31 | 2,3,8,26,2<br>8,29,30,32 | 3 P50116,Q03191,Q9QYP1                             |
| 4758 | 1,4,5,6,7,2<br>5,27,32 | 2,3,8,26,2<br>8,29,30,31 | 2 P50116,Q03191                                    |
| 4759 | 1,4,5,6,7,2<br>5,28,29 | 2,3,8,26,2<br>7,30,31,32 | 2 P00762,Q63617                                    |
| 4760 | 1,4,5,6,7,2<br>5,28,30 | 2,3,8,26,2<br>7,29,31,32 | 1 Q5PQL7                                           |
| 4761 | 1,4,5,6,7,2<br>5,28,31 | 2,3,8,26,2<br>7,29,30,32 | 0                                                  |
| 4762 | 1,4,5,6,7,2<br>5,28,32 | 2,3,8,26,2<br>7,29,30,31 | 3 P11598,Q5PQL7,Q62975                             |
| 4763 | 1,4,5,6,7,2<br>5,29,30 | 2,3,8,26,2<br>7,28,31,32 | 1 Q9QWN8                                           |
| 4764 | 1,4,5,6,7,2<br>5,29,31 | 2,3,8,26,2<br>7,28,30,32 | 1 Q9QWN8                                           |
| 4765 | 1,4,5,6,7,2<br>5,29,32 | 2,3,8,26,2<br>7,28,30,31 | 0                                                  |
| 4766 | 1,4,5,6,7,2<br>5,30,31 | 2,3,8,26,2<br>7,28,29,32 | 3 P25809,Q9QWN8,Q9WVK7                             |
| 4767 | 1,4,5,6,7,2<br>5,30,32 | 2,3,8,26,2<br>7,28,29,31 | 7 P25809,P26342,Q5BJY9,Q5PQL7,Q6P6R2,Q9R168,Q9WVK7 |
| 4768 | 1,4,5,6,7,2<br>5,31,32 | 2,3,8,26,2<br>7,28,29,30 | 3 P10719,P25809,Q9WVK7                             |

|      |                        |                          |   |                                                                |
|------|------------------------|--------------------------|---|----------------------------------------------------------------|
| 4769 | 1,4,5,6,7,2<br>6,27,28 | 2,3,8,25,2<br>9,30,31,32 | 8 | P02625,P11598,P21588,P50116,P97840,Q63617,Q99041,Q9Z0J6        |
| 4770 | 1,4,5,6,7,2<br>6,27,29 | 2,3,8,25,2<br>8,30,31,32 | 4 | P02625,P11598,P21588,P50116                                    |
| 4771 | 1,4,5,6,7,2<br>6,27,30 | 2,3,8,25,2<br>8,29,31,32 | 4 | P21588,P50116,Q03191,Q9Z0J6                                    |
| 4772 | 1,4,5,6,7,2<br>6,27,31 | 2,3,8,25,2<br>8,29,30,32 | 3 | P50116,Q03191,Q9Z0J6                                           |
| 4773 | 1,4,5,6,7,2<br>6,27,32 | 2,3,8,25,2<br>8,29,30,31 | 4 | P11598,P50116,Q03191,Q9Z0J6                                    |
| 4774 | 1,4,5,6,7,2<br>6,28,29 | 2,3,8,25,2<br>7,30,31,32 | 8 | P00762,P02625,P11598,P21588,P21674,P47967,P97840,Q63617        |
| 4775 | 1,4,5,6,7,2<br>6,28,30 | 2,3,8,25,2<br>7,29,31,32 | 3 | P00762,P21588,P97840                                           |
| 4776 | 1,4,5,6,7,2<br>6,28,31 | 2,3,8,25,2<br>7,29,30,32 | 3 | P00762,P11598,Q9Z0J6                                           |
| 4777 | 1,4,5,6,7,2<br>6,28,32 | 2,3,8,25,2<br>7,29,30,31 | 2 | P11598,Q9Z0J6                                                  |
| 4778 | 1,4,5,6,7,2<br>6,29,30 | 2,3,8,25,2<br>7,28,31,32 | 5 | P00762,P21588,P36376,P36860,P49134                             |
| 4779 | 1,4,5,6,7,2<br>6,29,31 | 2,3,8,25,2<br>7,28,30,32 | 4 | B1H234,P00762,P36860,P49134                                    |
| 4780 | 1,4,5,6,7,2<br>6,29,32 | 2,3,8,25,2<br>7,28,30,31 | 2 | P36376,P36860                                                  |
| 4781 | 1,4,5,6,7,2<br>6,30,31 | 2,3,8,25,2<br>7,28,29,32 | 5 | P25809,P36860,Q5RJR2,Q9WVK7,Q9Z0J6                             |
| 4782 | 1,4,5,6,7,2<br>6,30,32 | 2,3,8,25,2<br>7,28,29,31 | 5 | P36376,P36860,Q8VD89,Q9WVK7,Q9Z0J6                             |
| 4783 | 1,4,5,6,7,2<br>6,31,32 | 2,3,8,25,2<br>7,28,29,30 | 3 | P36860,Q9WVK7,Q9Z0J6                                           |
| 4784 | 1,4,5,6,7,2<br>7,28,29 | 2,3,8,25,2<br>6,30,31,32 | 7 | P02625,P11598,P22283,P47967,P50116,P97840,Q63617               |
| 4785 | 1,4,5,6,7,2<br>7,28,30 | 2,3,8,25,2<br>6,29,31,32 | 9 | P11598,P19218,P21588,P50116,P97840,Q03191,Q8VD89,Q99041,Q9Z0J6 |
| 4786 | 1,4,5,6,7,2<br>7,28,31 | 2,3,8,25,2<br>6,29,30,32 | 6 | P11598,P50116,Q03191,Q63617,Q68G31,Q9Z0J6                      |
| 4787 | 1,4,5,6,7,2<br>7,28,32 | 2,3,8,25,2<br>6,29,30,31 | 7 | P11598,P22283,P50116,Q03191,Q62761;Q62762;Q62763,Q63617,Q9Z0J6 |
| 4788 | 1,4,5,6,7,2<br>7,29,30 | 2,3,8,25,2<br>6,28,31,32 | 4 | P19218,P21588,Q03191,Q923V8                                    |

|      |                        |                          |                                                           |
|------|------------------------|--------------------------|-----------------------------------------------------------|
| 4789 | 1,4,5,6,7,2<br>7,29,31 | 2,3,8,25,2<br>6,28,30,32 | 1 Q03191                                                  |
| 4790 | 1,4,5,6,7,2<br>7,29,32 | 2,3,8,25,2<br>6,28,30,31 | 3 P00714,P11598,Q03191                                    |
| 4791 | 1,4,5,6,7,2<br>7,30,31 | 2,3,8,25,2<br>6,28,29,32 | 4 P19218,P36860,Q03191,Q9Z0J6                             |
| 4792 | 1,4,5,6,7,2<br>7,30,32 | 2,3,8,25,2<br>6,28,29,31 | 5 P00714,P19218,Q03191,Q8VD89,Q9Z0J6                      |
| 4793 | 1,4,5,6,7,2<br>7,31,32 | 2,3,8,25,2<br>6,28,29,30 | 5 P00714,P22006,P80299,Q03191,Q9Z0J6                      |
| 4794 | 1,4,5,6,7,2<br>8,29,30 | 2,3,8,25,2<br>6,27,31,32 | 4 P00762,P19218,P97840,Q63617                             |
| 4795 | 1,4,5,6,7,2<br>8,29,31 | 2,3,8,25,2<br>6,27,30,32 | 5 B1H234,P00762,P11598,P21674,Q63617                      |
| 4796 | 1,4,5,6,7,2<br>8,29,32 | 2,3,8,25,2<br>6,27,30,31 | 3 P11598,P97840,Q63617                                    |
| 4797 | 1,4,5,6,7,2<br>8,30,31 | 2,3,8,25,2<br>6,27,29,32 | 2 P00762,Q9Z0J6                                           |
| 4798 | 1,4,5,6,7,2<br>8,30,32 | 2,3,8,25,2<br>6,27,29,31 | 5 P11598,P19218,Q5BJY9,Q8VD89,Q9Z0J6                      |
| 4799 | 1,4,5,6,7,2<br>8,31,32 | 2,3,8,25,2<br>6,27,29,30 | 3 P11598,P22006,Q9Z0J6                                    |
| 4800 | 1,4,5,6,7,2<br>9,30,31 | 2,3,8,25,2<br>6,27,28,32 | 5 B1H234,P26342,P36860,Q5RJR2,Q9QWN8                      |
| 4801 | 1,4,5,6,7,2<br>9,30,32 | 2,3,8,25,2<br>6,27,28,31 | 5 P00714,P26342,P36376,P36860,Q5BJY9                      |
| 4802 | 1,4,5,6,7,2<br>9,31,32 | 2,3,8,25,2<br>6,27,28,30 | 2 P26342,P36860                                           |
| 4803 | 1,4,5,6,7,3<br>0,31,32 | 2,3,8,25,2<br>6,27,28,29 | 8 P22006,P25809,P26342,P36860,Q5BJY9,Q6P6R2,Q9WVK7,Q9Z0J6 |
| 4804 | 1,4,5,6,8,2<br>5,26,27 | 2,3,7,28,2<br>9,30,31,32 | 3 P13432,P15399,P54921                                    |
| 4805 | 1,4,5,6,8,2<br>5,26,28 | 2,3,7,27,2<br>9,30,31,32 | 4 P08649,P13432,P80299,Q9QW07                             |
| 4806 | 1,4,5,6,8,2<br>5,26,29 | 2,3,7,27,2<br>8,30,31,32 | 2 P13432,P49134                                           |
| 4807 | 1,4,5,6,8,2<br>5,26,30 | 2,3,7,27,2<br>8,29,31,32 | 7 P35952,P49134,P54921,P80299,Q6AY61,Q6P6Q2,Q9WVK7        |
| 4808 | 1,4,5,6,8,2<br>5,26,31 | 2,3,7,27,2<br>8,29,30,32 | 4 P13432,P54921,Q63150,Q9WVK7                             |

|      |                        |                          |   |                                           |
|------|------------------------|--------------------------|---|-------------------------------------------|
| 4809 | 1,4,5,6,8,2<br>5,26,32 | 2,3,7,27,2<br>8,29,30,31 | 3 | P00507,P13432,Q9WVK7                      |
| 4810 | 1,4,5,6,8,2<br>5,27,28 | 2,3,7,26,2<br>9,30,31,32 | 4 | P06911,P20766,P22282,Q9QW07               |
| 4811 | 1,4,5,6,8,2<br>5,27,29 | 2,3,7,26,2<br>8,30,31,32 | 1 | P13432                                    |
| 4812 | 1,4,5,6,8,2<br>5,27,30 | 2,3,7,26,2<br>8,29,31,32 | 4 | P19218,Q4FZU2,Q6IMF3,Q6P6Q2               |
| 4813 | 1,4,5,6,8,2<br>5,27,31 | 2,3,7,26,2<br>8,29,30,32 | 3 | P23739,P54921,Q03191                      |
| 4814 | 1,4,5,6,8,2<br>5,27,32 | 2,3,7,26,2<br>8,29,30,31 | 3 | P01681,P13432,Q03191                      |
| 4815 | 1,4,5,6,8,2<br>5,28,29 | 2,3,7,26,2<br>7,30,31,32 | 3 | P13432,P20766,Q9QW07                      |
| 4816 | 1,4,5,6,8,2<br>5,28,30 | 2,3,7,26,2<br>7,29,31,32 | 2 | P20766,Q6P6Q2                             |
| 4817 | 1,4,5,6,8,2<br>5,28,31 | 2,3,7,26,2<br>7,29,30,32 | 1 | P06911                                    |
| 4818 | 1,4,5,6,8,2<br>5,28,32 | 2,3,7,26,2<br>7,29,30,31 | 4 | P01681,P13432,P20766,Q9QW07               |
| 4819 | 1,4,5,6,8,2<br>5,29,30 | 2,3,7,26,2<br>7,28,31,32 | 4 | P20766,Q4FZU2,Q6IMF3,Q6P6Q2               |
| 4820 | 1,4,5,6,8,2<br>5,29,31 | 2,3,7,26,2<br>7,28,30,32 | 1 | P13432                                    |
| 4821 | 1,4,5,6,8,2<br>5,29,32 | 2,3,7,26,2<br>7,28,30,31 | 2 | P13432,P20766                             |
| 4822 | 1,4,5,6,8,2<br>5,30,31 | 2,3,7,26,2<br>7,28,29,32 | 5 | P54921,Q4FZU2,Q6IMF3,Q6P6Q2,Q9WVK7        |
| 4823 | 1,4,5,6,8,2<br>5,30,32 | 2,3,7,26,2<br>7,28,29,31 | 6 | O88797,P01681,P13432,Q6IMF3,Q6P6Q2,Q9WVK7 |
| 4824 | 1,4,5,6,8,2<br>5,31,32 | 2,3,7,26,2<br>7,28,29,30 | 3 | P01681,P13432,Q9WVK7                      |
| 4825 | 1,4,5,6,8,2<br>6,27,28 | 2,3,7,25,2<br>9,30,31,32 | 4 | P15399,P21588,P22282,Q9JI85               |
| 4826 | 1,4,5,6,8,2<br>6,27,29 | 2,3,7,25,2<br>8,30,31,32 | 0 |                                           |
| 4827 | 1,4,5,6,8,2<br>6,27,30 | 2,3,7,25,2<br>8,29,31,32 | 4 | P15399,P21588,Q30KJ2,Q6P6Q2               |
| 4828 | 1,4,5,6,8,2<br>6,27,31 | 2,3,7,25,2<br>8,29,30,32 | 1 | P54921                                    |



|      |                        |                          |   |                                                                |
|------|------------------------|--------------------------|---|----------------------------------------------------------------|
| 4829 | 1,4,5,6,8,2<br>6,27,32 | 2,3,7,25,2<br>8,29,30,31 | 3 | P13432,P15399,P18418                                           |
| 4830 | 1,4,5,6,8,2<br>6,28,29 | 2,3,7,25,2<br>7,30,31,32 | 5 | P20766,P21674,P49134,Q9JI85,Q9QW07                             |
| 4831 | 1,4,5,6,8,2<br>6,28,30 | 2,3,7,25,2<br>7,29,31,32 | 2 | P20766,Q8VD89                                                  |
| 4832 | 1,4,5,6,8,2<br>6,28,31 | 2,3,7,25,2<br>7,29,30,32 | 0 |                                                                |
| 4833 | 1,4,5,6,8,2<br>6,28,32 | 2,3,7,25,2<br>7,29,30,31 | 4 | O54728,P13432,P18418,Q9JI85                                    |
| 4834 | 1,4,5,6,8,2<br>6,29,30 | 2,3,7,25,2<br>7,28,31,32 | 4 | P49134,Q5RJR2,Q6IMF3,Q6P6Q2                                    |
| 4835 | 1,4,5,6,8,2<br>6,29,31 | 2,3,7,25,2<br>7,28,30,32 | 2 | P49134,Q5RJR2                                                  |
| 4836 | 1,4,5,6,8,2<br>6,29,32 | 2,3,7,25,2<br>7,28,30,31 | 1 | P13432                                                         |
| 4837 | 1,4,5,6,8,2<br>6,30,31 | 2,3,7,25,2<br>7,28,29,32 | 5 | P49134,P54921,Q5RJR2,Q6AY61,Q6P6Q2                             |
| 4838 | 1,4,5,6,8,2<br>6,30,32 | 2,3,7,25,2<br>7,28,29,31 | 1 | Q8VD89                                                         |
| 4839 | 1,4,5,6,8,2<br>6,31,32 | 2,3,7,25,2<br>7,28,29,30 | 3 | O54728,P13432,P18418                                           |
| 4840 | 1,4,5,6,8,2<br>7,28,29 | 2,3,7,25,2<br>6,30,31,32 | 5 | P19218,P20766,P22282,Q812E4,Q9JI85                             |
| 4841 | 1,4,5,6,8,2<br>7,28,30 | 2,3,7,25,2<br>6,29,31,32 | 6 | P19218,P20766,P22282,Q10758,Q6P6Q2,Q8VD89                      |
| 4842 | 1,4,5,6,8,2<br>7,28,31 | 2,3,7,25,2<br>6,29,30,32 | 3 | P19218,P22282,P23739                                           |
| 4843 | 1,4,5,6,8,2<br>7,28,32 | 2,3,7,25,2<br>6,29,30,31 | 7 | B0LT89,P19218,P20766,P22282,Q6AYR9,Q8VD89,Q9JI85               |
| 4844 | 1,4,5,6,8,2<br>7,29,30 | 2,3,7,25,2<br>6,28,31,32 | 9 | P19218,P20766,Q10758,Q4FZU2,Q6IFU7,Q6IFU8,Q6IG02,Q6IMF3,Q6P6Q2 |
| 4845 | 1,4,5,6,8,2<br>7,29,31 | 2,3,7,25,2<br>6,28,30,32 | 0 |                                                                |
| 4846 | 1,4,5,6,8,2<br>7,29,32 | 2,3,7,25,2<br>6,28,30,31 | 2 | P13432,P22282                                                  |
| 4847 | 1,4,5,6,8,2<br>7,30,31 | 2,3,7,25,2<br>6,28,29,32 | 5 | P19218,P23739,Q10758,Q6IMF3,Q6P6Q2                             |
| 4848 | 1,4,5,6,8,2<br>7,30,32 | 2,3,7,25,2<br>6,28,29,31 | 5 | P19218,Q03191,Q6IMF3,Q6P6Q2,Q8VD89                             |

|      |                         |                          |   |                                           |
|------|-------------------------|--------------------------|---|-------------------------------------------|
| 4849 | 1,4,5,6,8,2<br>7,31,32  | 2,3,7,25,2<br>6,28,29,30 | 2 | P23739,Q03191                             |
| 4850 | 1,4,5,6,8,2<br>8,29,30  | 2,3,7,25,2<br>6,27,31,32 | 5 | P19218,P20766,P21674,Q6IMF3,Q6P6Q2        |
| 4851 | 1,4,5,6,8,2<br>8,29,31  | 2,3,7,25,2<br>6,27,30,32 | 1 | P21674                                    |
| 4852 | 1,4,5,6,8,2<br>8,29,32  | 2,3,7,25,2<br>6,27,30,31 | 3 | P20766,Q9JI85,Q9QW07                      |
| 4853 | 1,4,5,6,8,2<br>8,30,31  | 2,3,7,25,2<br>6,27,29,32 | 3 | P19218,Q6P6Q2,Q8VD89                      |
| 4854 | 1,4,5,6,8,2<br>8,30,32  | 2,3,7,25,2<br>6,27,29,31 | 4 | P19218,P20766,Q6P6Q2,Q8VD89               |
| 4855 | 1,4,5,6,8,2<br>8,31,32  | 2,3,7,25,2<br>6,27,29,30 | 2 | P22006,Q63532                             |
| 4856 | 1,4,5,6,8,2<br>9,30,31  | 2,3,7,25,2<br>6,27,28,32 | 4 | P36860,Q5RJR2,Q6IMF3,Q6P6Q2               |
| 4857 | 1,4,5,6,8,2<br>9,30,32  | 2,3,7,25,2<br>6,27,28,31 | 4 | P20766,P36860,Q6IMF3,Q6P6Q2               |
| 4858 | 1,4,5,6,8,2<br>9,31,32  | 2,3,7,25,2<br>6,27,28,30 | 2 | P13432,P36860                             |
| 4859 | 1,4,5,6,8,3<br>0,31,32  | 2,3,7,25,2<br>6,27,28,29 | 6 | P20646,P36860,Q6IMF3,Q6P6Q2,Q8VD89,Q9WVK7 |
| 4860 | 1,4,5,6,25,<br>26,27,28 | 2,3,7,8,29,<br>30,31,32  | 3 | P20766,P21588,P35280                      |
| 4861 | 1,4,5,6,25,<br>26,27,29 | 2,3,7,8,28,<br>30,31,32  | 3 | P20766,P21588,P35280                      |
| 4862 | 1,4,5,6,25,<br>26,27,30 | 2,3,7,8,28,<br>29,31,32  | 1 | P21588                                    |
| 4863 | 1,4,5,6,25,<br>26,27,31 | 2,3,7,8,28,<br>29,30,32  | 3 | P35280,P54921,P62804                      |
| 4864 | 1,4,5,6,25,<br>26,27,32 | 2,3,7,8,28,<br>29,30,31  | 2 | P62804,Q03191                             |
| 4865 | 1,4,5,6,25,<br>26,28,29 | 2,3,7,8,27,<br>30,31,32  | 2 | P20766,P35280                             |
| 4866 | 1,4,5,6,25,<br>26,28,30 | 2,3,7,8,27,<br>29,31,32  | 3 | P20766,P21588,Q5PQL7                      |
| 4867 | 1,4,5,6,25,<br>26,28,31 | 2,3,7,8,27,<br>29,30,32  | 2 | P35280,P62804                             |
| 4868 | 1,4,5,6,25,<br>26,28,32 | 2,3,7,8,27,<br>29,30,31  | 3 | P20766,P62804,Q5PQL7                      |

|      |                                              |                                                           |
|------|----------------------------------------------|-----------------------------------------------------------|
| 4869 | 1,4,5,6,25, 2,3,7,8,27,<br>26,29,30 28,31,32 | 2 P20766,P21588                                           |
| 4870 | 1,4,5,6,25, 2,3,7,8,27,<br>26,29,31 28,30,32 | 1 P35280                                                  |
| 4871 | 1,4,5,6,25, 2,3,7,8,27,<br>26,29,32 28,30,31 | 1 P20766                                                  |
| 4872 | 1,4,5,6,25, 2,3,7,8,27,<br>26,30,31 28,29,32 | 7 P25809,P54921,P62804,Q00715,Q812E4,Q9EQS0,Q9WVK7        |
| 4873 | 1,4,5,6,25, 2,3,7,8,27,<br>26,30,32 28,29,31 | 8 P00507,P20766,P25809,P62804,Q00715,Q5PQL7,Q9EQS0,Q9WVK7 |
| 4874 | 1,4,5,6,25, 2,3,7,8,27,<br>26,31,32 28,29,30 | 5 P00507,P25809,P62804,Q00715,Q9WVK7                      |
| 4875 | 1,4,5,6,25, 2,3,7,8,26,<br>27,28,29 30,31,32 | 3 P20766,P35280,P97615                                    |
| 4876 | 1,4,5,6,25, 2,3,7,8,26,<br>27,28,30 29,31,32 | 1 P20766                                                  |
| 4877 | 1,4,5,6,25, 2,3,7,8,26,<br>27,28,31 29,30,32 | 2 P23739,P35280                                           |
| 4878 | 1,4,5,6,25, 2,3,7,8,26,<br>27,28,32 29,30,31 | 3 P20766,Q03191,Q62761;Q62762;Q62763                      |
| 4879 | 1,4,5,6,25, 2,3,7,8,26,<br>27,29,30 28,31,32 | 2 P20766,Q923V8                                           |
| 4880 | 1,4,5,6,25, 2,3,7,8,26,<br>27,29,31 28,30,32 | 1 P35280                                                  |
| 4881 | 1,4,5,6,25, 2,3,7,8,26,<br>27,29,32 28,30,31 | 2 P20766,Q03191                                           |
| 4882 | 1,4,5,6,25, 2,3,7,8,26,<br>27,30,31 28,29,32 | 4 P23739,P54921,Q03191,Q9QYP1                             |
| 4883 | 1,4,5,6,25, 2,3,7,8,26,<br>27,30,32 28,29,31 | 7 P20766,Q03191,Q62687,Q63424,Q64093,Q6P6R2,Q9QX74        |
| 4884 | 1,4,5,6,25, 2,3,7,8,26,<br>27,31,32 28,29,30 | 4 P23739,P62804,Q03191,Q9QYP1                             |
| 4885 | 1,4,5,6,25, 2,3,7,8,26,<br>28,29,30 27,31,32 | 1 P20766                                                  |
| 4886 | 1,4,5,6,25, 2,3,7,8,26,<br>28,29,31 27,30,32 | 1 P35280                                                  |
| 4887 | 1,4,5,6,25, 2,3,7,8,26,<br>28,29,32 27,30,31 | 1 P20766                                                  |
| 4888 | 1,4,5,6,25, 2,3,7,8,26,<br>28,30,31 27,29,32 | 1 P25809                                                  |

|      |                                              |                                                                                 |
|------|----------------------------------------------|---------------------------------------------------------------------------------|
| 4889 | 1,4,5,6,25, 2,3,7,8,26,<br>28,30,32 27,29,31 | 6 P20766,P25809,Q5PQL7,Q62975,Q8VD89,Q9QX74                                     |
| 4890 | 1,4,5,6,25, 2,3,7,8,26,<br>28,31,32 27,29,30 | 3 P22006,P25809,P62804                                                          |
| 4891 | 1,4,5,6,25, 2,3,7,8,26,<br>29,30,31 27,28,32 | 3 P25809,P36860,Q9QWN8                                                          |
| 4892 | 1,4,5,6,25, 2,3,7,8,26,<br>29,30,32 27,28,31 | 6 P20766,P25809,P36860,Q5BJY9,Q9WTT6,Q9WVK7                                     |
| 4893 | 1,4,5,6,25, 2,3,7,8,26,<br>29,31,32 27,28,30 | 5 P11883,P25809,P36860,P62804,Q9WTT6                                            |
| 4894 | 1,4,5,6,25, 2,3,7,8,26,<br>30,31,32 27,28,29 | 11 P25809,P36860,P47967,P62804,P97584,Q00715,Q5U2V4,Q6P6R2,Q9QX74,Q9WTT6,Q9WVK7 |
| 4895 | 1,4,5,6,26, 2,3,7,8,25,<br>27,28,29 30,31,32 | 4 P02625,P20766,P21588,P35280                                                   |
| 4896 | 1,4,5,6,26, 2,3,7,8,25,<br>27,28,30 29,31,32 | 3 P20766,P21588,Q8VD89                                                          |
| 4897 | 1,4,5,6,26, 2,3,7,8,25,<br>27,28,31 29,30,32 | 1 P35280                                                                        |
| 4898 | 1,4,5,6,26, 2,3,7,8,25,<br>27,28,32 29,30,31 | 2 P20766,Q8VD89                                                                 |
| 4899 | 1,4,5,6,26, 2,3,7,8,25,<br>27,29,30 28,31,32 | 4 P20766,P21588,Q811M5,Q923V8                                                   |
| 4900 | 1,4,5,6,26, 2,3,7,8,25,<br>27,29,31 28,30,32 | 1 P35280                                                                        |
| 4901 | 1,4,5,6,26, 2,3,7,8,25,<br>27,29,32 28,30,31 | 1 P20766                                                                        |
| 4902 | 1,4,5,6,26, 2,3,7,8,25,<br>27,30,31 28,29,32 | 1 P36860                                                                        |
| 4903 | 1,4,5,6,26, 2,3,7,8,25,<br>27,30,32 28,29,31 | 3 P21588,P36860,Q8VD89                                                          |
| 4904 | 1,4,5,6,26, 2,3,7,8,25,<br>27,31,32 28,29,30 | 4 P22006,P36860,P62804,Q03191                                                   |
| 4905 | 1,4,5,6,26, 2,3,7,8,25,<br>28,29,30 27,31,32 | 2 P20766,P21588                                                                 |
| 4906 | 1,4,5,6,26, 2,3,7,8,25,<br>28,29,31 27,30,32 | 1 P35280                                                                        |
| 4907 | 1,4,5,6,26, 2,3,7,8,25,<br>28,29,32 27,30,31 | 1 P20766                                                                        |
| 4908 | 1,4,5,6,26, 2,3,7,8,25,<br>28,30,31 27,29,32 | 1 Q8VD89                                                                        |

|      |                                              |                                                                          |
|------|----------------------------------------------|--------------------------------------------------------------------------|
| 4909 | 1,4,5,6,26, 2,3,7,8,25,<br>28,30,32 27,29,31 | 2 P20766,Q8VD89                                                          |
| 4910 | 1,4,5,6,26, 2,3,7,8,25,<br>28,31,32 27,29,30 | 3 O54728,P22006,P62804                                                   |
| 4911 | 1,4,5,6,26, 2,3,7,8,25,<br>29,30,31 27,28,32 | 3 B1H234,P36860,Q5RJR2                                                   |
| 4912 | 1,4,5,6,26, 2,3,7,8,25,<br>29,30,32 27,28,31 | 3 P20766,P36376,P36860                                                   |
| 4913 | 1,4,5,6,26, 2,3,7,8,25,<br>29,31,32 27,28,30 | 2 P36860,P62804                                                          |
| 4914 | 1,4,5,6,26, 2,3,7,8,25,<br>30,31,32 27,28,29 | 10 P22006,P25809,P36860,P62804,Q00715,Q4G075,Q8VD89,Q9EQS0,Q9WTT6,Q9WVK7 |
| 4915 | 1,4,5,6,27, 2,3,7,8,25,<br>28,29,30 26,31,32 | 4 P19218,P20766,P21588,Q923V8                                            |
| 4916 | 1,4,5,6,27, 2,3,7,8,25,<br>28,29,31 26,30,32 | 1 P35280                                                                 |
| 4917 | 1,4,5,6,27, 2,3,7,8,25,<br>28,29,32 26,30,31 | 4 O35547,P20766,Q62761;Q62762;Q62763,Q6AYR9                              |
| 4918 | 1,4,5,6,27, 2,3,7,8,25,<br>28,30,31 26,29,32 | 2 P19218,Q8VD89                                                          |
| 4919 | 1,4,5,6,27, 2,3,7,8,25,<br>28,30,32 26,29,31 | 4 P19218,P20766,Q8VD89,Q9QX74                                            |
| 4920 | 1,4,5,6,27, 2,3,7,8,25,<br>28,31,32 26,29,30 | 5 P22006,P23739,P62804,Q03191,Q8VD89                                     |
| 4921 | 1,4,5,6,27, 2,3,7,8,25,<br>29,30,31 26,28,32 | 3 B1H234,P36860,Q923V8                                                   |
| 4922 | 1,4,5,6,27, 2,3,7,8,25,<br>29,30,32 26,28,31 | 4 P20766,P36860,Q63598,Q923V8                                            |
| 4923 | 1,4,5,6,27, 2,3,7,8,25,<br>29,31,32 26,28,30 | 2 P36860,Q03191                                                          |
| 4924 | 1,4,5,6,27, 2,3,7,8,25,<br>30,31,32 26,28,29 | 9 P22006,P23739,P36860,P62804,Q03191,Q64093,Q6P6R2,Q8VD89,Q9WTT6         |
| 4925 | 1,4,5,6,28, 2,3,7,8,25,<br>29,30,31 26,27,32 | 2 B1H234,P36860                                                          |
| 4926 | 1,4,5,6,28, 2,3,7,8,25,<br>29,30,32 26,27,31 | 3 P20766,P36860,Q5BJY9                                                   |
| 4927 | 1,4,5,6,28, 2,3,7,8,25,<br>29,31,32 26,27,30 | 1 P22006                                                                 |
| 4928 | 1,4,5,6,28, 2,3,7,8,25,<br>30,31,32 26,27,29 | 9 P22006,P25809,P36860,P62804,Q4G075,Q5BJY9,Q8VD89,Q9QX74,Q9WTT6         |

|      |                                              |                                                                  |
|------|----------------------------------------------|------------------------------------------------------------------|
| 4929 | 1,4,5,6,29, 2,3,7,8,25,<br>30,31,32 26,27,28 | 6 B1H234,P25809,P26342,P36860,Q5BJY9,Q9WTT6                      |
| 4930 | 1,4,5,7,8,2 2,3,6,28,2<br>5,26,27 9,30,31,32 | 3 Q03191,Q4G075,Q9WTT6                                           |
| 4931 | 1,4,5,7,8,2 2,3,6,27,2<br>5,26,28 9,30,31,32 | 2 P49134,Q9WTT6                                                  |
| 4932 | 1,4,5,7,8,2 2,3,6,27,2<br>5,26,29 8,30,31,32 | 5 P06760,P22006,P48032,P49134,Q9QX74                             |
| 4933 | 1,4,5,7,8,2 2,3,6,27,2<br>5,26,30 8,29,31,32 | 5 P49134,Q4FZU2,Q6IMF3,Q6P6Q2,Q9WVK7                             |
| 4934 | 1,4,5,7,8,2 2,3,6,27,2<br>5,26,31 8,29,30,32 | 3 P49134,Q9WVK7,Q9Z0V6                                           |
| 4935 | 1,4,5,7,8,2 2,3,6,27,2<br>5,26,32 8,29,30,31 | 3 P01681,P13432,Q9WVK7                                           |
| 4936 | 1,4,5,7,8,2 2,3,6,26,2<br>5,27,28 9,30,31,32 | 3 P22282,Q03191,Q4G075                                           |
| 4937 | 1,4,5,7,8,2 2,3,6,26,2<br>5,27,29 8,30,31,32 | 6 O89117,P06760,P22006,Q03191,Q4G075,Q99MH3                      |
| 4938 | 1,4,5,7,8,2 2,3,6,26,2<br>5,27,30 8,29,31,32 | 7 Q03191,Q4FZU2,Q4G075,Q6IFU8,Q6IFW6,Q6IMF3,Q6P6Q2               |
| 4939 | 1,4,5,7,8,2 2,3,6,26,2<br>5,27,31 8,29,30,32 | 4 P23739,Q03191,Q4G075,Q68G31                                    |
| 4940 | 1,4,5,7,8,2 2,3,6,26,2<br>5,27,32 8,29,30,31 | 4 P01681,P22282,Q01984,Q03191                                    |
| 4941 | 1,4,5,7,8,2 2,3,6,26,2<br>5,28,29 7,30,31,32 | 3 P06760,P49134,Q99MH3                                           |
| 4942 | 1,4,5,7,8,2 2,3,6,26,2<br>5,28,30 7,29,31,32 | 2 Q6IMF3,Q6P6Q2                                                  |
| 4943 | 1,4,5,7,8,2 2,3,6,26,2<br>5,28,31 7,29,30,32 | 2 P82471,Q811M5                                                  |
| 4944 | 1,4,5,7,8,2 2,3,6,26,2<br>5,28,32 7,29,30,31 | 2 P01681,Q811M5                                                  |
| 4945 | 1,4,5,7,8,2 2,3,6,26,2<br>5,29,30 7,28,31,32 | 9 P06760,P22006,P48032,P49134,Q4FZU2,Q6IFU8,Q6IFW6,Q6IMF3,Q6P6Q2 |
| 4946 | 1,4,5,7,8,2 2,3,6,26,2<br>5,29,31 7,28,30,32 | 3 P06760,P49134,P82471                                           |
| 4947 | 1,4,5,7,8,2 2,3,6,26,2<br>5,29,32 7,28,30,31 | 3 P01681,P06760,P13432                                           |
| 4948 | 1,4,5,7,8,2 2,3,6,26,2<br>5,30,31 7,28,29,32 | 5 P49134,Q4FZU2,Q6IMF3,Q6P6Q2,Q9WVK7                             |

|      |                        |                          |    |                                                                                                   |
|------|------------------------|--------------------------|----|---------------------------------------------------------------------------------------------------|
| 4949 | 1,4,5,7,8,2<br>5,30,32 | 2,3,6,26,2<br>7,28,29,31 | 5  | P01681,Q4FZU2,Q6IMF3,Q6P6Q2,Q9WVK7                                                                |
| 4950 | 1,4,5,7,8,2<br>5,31,32 | 2,3,6,26,2<br>7,28,29,30 | 4  | P01681,P82471,Q811M5,Q9WVK7                                                                       |
| 4951 | 1,4,5,7,8,2<br>6,27,28 | 2,3,6,25,2<br>9,30,31,32 | 7  | D3ZUC6,P07150,P22282,P47967,P97840,Q4G075,Q9WTT6                                                  |
| 4952 | 1,4,5,7,8,2<br>6,27,29 | 2,3,6,25,2<br>8,30,31,32 | 4  | P06760,Q4G075,Q9QX74,Q9WTT6                                                                       |
| 4953 | 1,4,5,7,8,2<br>6,27,30 | 2,3,6,25,2<br>8,29,31,32 | 3  | Q4FZU2,Q6IMF3,Q6P6Q2                                                                              |
| 4954 | 1,4,5,7,8,2<br>6,27,31 | 2,3,6,25,2<br>8,29,30,32 | 2  | P23739,Q68G31                                                                                     |
| 4955 | 1,4,5,7,8,2<br>6,27,32 | 2,3,6,25,2<br>8,29,30,31 | 2  | P22282,Q03191                                                                                     |
| 4956 | 1,4,5,7,8,2<br>6,28,29 | 2,3,6,25,2<br>7,30,31,32 | 10 | D3ZUC6,P06760,P20646,P21674,P47967,P49134,P97840,Q6P6R2,Q9QX74,Q9WTT6                             |
| 4957 | 1,4,5,7,8,2<br>6,28,30 | 2,3,6,25,2<br>7,29,31,32 | 3  | P49134,P97840,Q6P6Q2                                                                              |
| 4958 | 1,4,5,7,8,2<br>6,28,31 | 2,3,6,25,2<br>7,29,30,32 | 3  | P49134,P82471,Q5RLM2                                                                              |
| 4959 | 1,4,5,7,8,2<br>6,28,32 | 2,3,6,25,2<br>7,29,30,31 | 1  | O54728                                                                                            |
| 4960 | 1,4,5,7,8,2<br>6,29,30 | 2,3,6,25,2<br>7,28,31,32 | 6  | P06760,P49134,Q5RJR2,Q6IMF3,Q6P6Q2,Q9QX74                                                         |
| 4961 | 1,4,5,7,8,2<br>6,29,31 | 2,3,6,25,2<br>7,28,30,32 | 5  | P06760,P49134,P82471,Q5RJR2,Q9QX74                                                                |
| 4962 | 1,4,5,7,8,2<br>6,29,32 | 2,3,6,25,2<br>7,28,30,31 | 3  | P06760,P49134,Q9QX74                                                                              |
| 4963 | 1,4,5,7,8,2<br>6,30,31 | 2,3,6,25,2<br>7,28,29,32 | 4  | P49134,Q5RJR2,Q6IMF3,Q6P6Q2                                                                       |
| 4964 | 1,4,5,7,8,2<br>6,30,32 | 2,3,6,25,2<br>7,28,29,31 | 2  | P49134,Q6P6Q2                                                                                     |
| 4965 | 1,4,5,7,8,2<br>6,31,32 | 2,3,6,25,2<br>7,28,29,30 | 2  | O54728,P82471                                                                                     |
| 4966 | 1,4,5,7,8,2<br>7,28,29 | 2,3,6,25,2<br>6,30,31,32 | 14 | D3ZUC6,P06760,P22273,P22282,P22283,P47967,P97840,Q4G075,Q5I0D1,Q63493,Q63617,Q812E4,Q99MH3,Q9Z2L0 |
| 4967 | 1,4,5,7,8,2<br>7,28,30 | 2,3,6,25,2<br>6,29,31,32 | 6  | P19218,P22282,P97840,Q4G075,Q6IMF3,Q6P6Q2                                                         |
| 4968 | 1,4,5,7,8,2<br>7,28,31 | 2,3,6,25,2<br>6,29,30,32 | 5  | D3ZUC6,P22282,P23739,P82471,Q68G31                                                                |

|      |                         |                          |   |                                                                |
|------|-------------------------|--------------------------|---|----------------------------------------------------------------|
| 4969 | 1,4,5,7,8,2<br>7,28,32  | 2,3,6,25,2<br>6,29,30,31 | 6 | P04905,P22282,P97840,Q03191,Q6AYR9,Q812E4                      |
| 4970 | 1,4,5,7,8,2<br>7,29,30  | 2,3,6,25,2<br>6,28,31,32 | 9 | P06760,P19218,Q4FZU2,Q4G075,Q6IFU8,Q6IFW6,Q6IG02,Q6IMF3,Q6P6Q2 |
| 4971 | 1,4,5,7,8,2<br>7,29,31  | 2,3,6,25,2<br>6,28,30,32 | 6 | P06760,P82471,Q4G075,Q68G31,Q99MH3,Q9QX74                      |
| 4972 | 1,4,5,7,8,2<br>7,29,32  | 2,3,6,25,2<br>6,28,30,31 | 4 | P06760,P22282,Q03191,Q4G075                                    |
| 4973 | 1,4,5,7,8,2<br>7,30,31  | 2,3,6,25,2<br>6,28,29,32 | 6 | P19218,P23739,Q4FZU2,Q6IFU8,Q6IMF3,Q6P6Q2                      |
| 4974 | 1,4,5,7,8,2<br>7,30,32  | 2,3,6,25,2<br>6,28,29,31 | 5 | P19218,Q03191,Q4FZU2,Q6IMF3,Q6P6Q2                             |
| 4975 | 1,4,5,7,8,2<br>7,31,32  | 2,3,6,25,2<br>6,28,29,30 | 3 | P23739,P82471,Q03191                                           |
| 4976 | 1,4,5,7,8,2<br>8,29,30  | 2,3,6,25,2<br>6,27,31,32 | 7 | P06760,P19218,P21674,P49134,P97840,Q6IMF3,Q6P6Q2               |
| 4977 | 1,4,5,7,8,2<br>8,29,31  | 2,3,6,25,2<br>6,27,30,32 | 6 | D3ZUC6,P06760,P21674,P49134,P82471,Q63493                      |
| 4978 | 1,4,5,7,8,2<br>8,29,32  | 2,3,6,25,2<br>6,27,30,31 | 7 | P06760,P08723,P21674,P30120,P97840,Q63493,Q812E4               |
| 4979 | 1,4,5,7,8,2<br>8,30,31  | 2,3,6,25,2<br>6,27,29,32 | 5 | P35745,P49134,P82471,Q6IMF3,Q6P6Q2                             |
| 4980 | 1,4,5,7,8,2<br>8,30,32  | 2,3,6,25,2<br>6,27,29,31 | 3 | P19218,Q6IMF3,Q6P6Q2                                           |
| 4981 | 1,4,5,7,8,2<br>8,31,32  | 2,3,6,25,2<br>6,27,29,30 | 2 | P82471,Q811M5                                                  |
| 4982 | 1,4,5,7,8,2<br>9,30,31  | 2,3,6,25,2<br>6,27,28,32 | 7 | P49134,P82471,Q4FZU2,Q5RJR2,Q6IMF3,Q6P6Q2,Q9QWN8               |
| 4983 | 1,4,5,7,8,2<br>9,30,32  | 2,3,6,25,2<br>6,27,28,31 | 3 | Q4FZU2,Q6IMF3,Q6P6Q2                                           |
| 4984 | 1,4,5,7,8,2<br>9,31,32  | 2,3,6,25,2<br>6,27,28,30 | 1 | P82471                                                         |
| 4985 | 1,4,5,7,8,3<br>0,31,32  | 2,3,6,25,2<br>6,27,28,29 | 5 | P82471,Q4FZU2,Q6IMF3,Q6P6Q2,Q9WVK7                             |
| 4986 | 1,4,5,7,25,<br>26,27,28 | 2,3,6,8,29,<br>30,31,32  | 1 | P20646                                                         |
| 4987 | 1,4,5,7,25,<br>26,27,29 | 2,3,6,8,28,<br>30,31,32  | 1 | O89117                                                         |
| 4988 | 1,4,5,7,25,<br>26,27,30 | 2,3,6,8,28,<br>29,31,32  | 2 | P21588,Q03191                                                  |



|      |                                              |                                      |
|------|----------------------------------------------|--------------------------------------|
| 4989 | 1,4,5,7,25, 2,3,6,8,28,<br>26,27,31 29,30,32 | 4 P23739,Q03191,Q68G31,Q9QYP1        |
| 4990 | 1,4,5,7,25, 2,3,6,8,28,<br>26,27,32 29,30,31 | 1 Q03191                             |
| 4991 | 1,4,5,7,25, 2,3,6,8,27,<br>26,28,29 30,31,32 | 1 P20646                             |
| 4992 | 1,4,5,7,25, 2,3,6,8,27,<br>26,28,30 29,31,32 | 0                                    |
| 4993 | 1,4,5,7,25, 2,3,6,8,27,<br>26,28,31 29,30,32 | 0                                    |
| 4994 | 1,4,5,7,25, 2,3,6,8,27,<br>26,28,32 29,30,31 | 0                                    |
| 4995 | 1,4,5,7,25, 2,3,6,8,27,<br>26,29,30 28,31,32 | 0                                    |
| 4996 | 1,4,5,7,25, 2,3,6,8,27,<br>26,29,31 28,30,32 | 1 Q6P6S4                             |
| 4997 | 1,4,5,7,25, 2,3,6,8,27,<br>26,29,32 28,30,31 | 1 P36376                             |
| 4998 | 1,4,5,7,25, 2,3,6,8,27,<br>26,30,31 28,29,32 | 2 P25809,Q9WVK7                      |
| 4999 | 1,4,5,7,25, 2,3,6,8,27,<br>26,30,32 28,29,31 | 2 Q9R168,Q9WVK7                      |
| 5000 | 1,4,5,7,25, 2,3,6,8,27,<br>26,31,32 28,29,30 | 1 Q9WVK7                             |
| 5001 | 1,4,5,7,25, 2,3,6,8,26,<br>27,28,29 30,31,32 | 4 O89117,P97615,P97840,Q99MH3        |
| 5002 | 1,4,5,7,25, 2,3,6,8,26,<br>27,28,30 29,31,32 | 1 Q03191                             |
| 5003 | 1,4,5,7,25, 2,3,6,8,26,<br>27,28,31 29,30,32 | 4 P23739,Q03191,Q68G31,Q99MH3        |
| 5004 | 1,4,5,7,25, 2,3,6,8,26,<br>27,28,32 29,30,31 | 3 Q03191,Q62761;Q62762;Q62763,Q99MH3 |
| 5005 | 1,4,5,7,25, 2,3,6,8,26,<br>27,29,30 28,31,32 | 3 O89117,Q03191,Q99MH3               |
| 5006 | 1,4,5,7,25, 2,3,6,8,26,<br>27,29,31 28,30,32 | 4 O89117,Q03191,Q68G31,Q99MH3        |
| 5007 | 1,4,5,7,25, 2,3,6,8,26,<br>27,29,32 28,30,31 | 3 O89117,Q03191,Q99MH3               |
| 5008 | 1,4,5,7,25, 2,3,6,8,26,<br>27,30,31 28,29,32 | 3 P23739,Q03191,Q9QYP1               |

|      |                                              |                                      |
|------|----------------------------------------------|--------------------------------------|
| 5009 | 1,4,5,7,25, 2,3,6,8,26,<br>27,30,32 28,29,31 | 1 Q03191                             |
| 5010 | 1,4,5,7,25, 2,3,6,8,26,<br>27,31,32 28,29,30 | 3 P23739,Q03191,Q9QYP1               |
| 5011 | 1,4,5,7,25, 2,3,6,8,26,<br>28,29,30 27,31,32 | 1 Q99MH3                             |
| 5012 | 1,4,5,7,25, 2,3,6,8,26,<br>28,29,31 27,30,32 | 1 Q99MH3                             |
| 5013 | 1,4,5,7,25, 2,3,6,8,26,<br>28,29,32 27,30,31 | 1 Q99MH3                             |
| 5014 | 1,4,5,7,25, 2,3,6,8,26,<br>28,30,31 27,29,32 | 1 P25809                             |
| 5015 | 1,4,5,7,25, 2,3,6,8,26,<br>28,30,32 27,29,31 | 3 Q5BJY9,Q62975,Q9R168               |
| 5016 | 1,4,5,7,25, 2,3,6,8,26,<br>28,31,32 27,29,30 | 1 Q811M5                             |
| 5017 | 1,4,5,7,25, 2,3,6,8,26,<br>29,30,31 27,28,32 | 2 Q9QWN8,Q9WVK7                      |
| 5018 | 1,4,5,7,25, 2,3,6,8,26,<br>29,30,32 27,28,31 | 3 Q5BJY9,Q9R168,Q9WVK7               |
| 5019 | 1,4,5,7,25, 2,3,6,8,26,<br>29,31,32 27,28,30 | 1 Q9WVK7                             |
| 5020 | 1,4,5,7,25, 2,3,6,8,26,<br>30,31,32 27,28,29 | 5 P25809,P26342,Q6P6R2,Q9QYP1,Q9WVK7 |
| 5021 | 1,4,5,7,26, 2,3,6,8,25,<br>27,28,29 30,31,32 | 5 P02625,P20646,P21588,P47967,P97840 |
| 5022 | 1,4,5,7,26, 2,3,6,8,25,<br>27,28,30 29,31,32 | 2 P21588,P97840                      |
| 5023 | 1,4,5,7,26, 2,3,6,8,25,<br>27,28,31 29,30,32 | 1 Q68G31                             |
| 5024 | 1,4,5,7,26, 2,3,6,8,25,<br>27,28,32 29,30,31 | 3 P97840,Q03191,Q62761;Q62762;Q62763 |
| 5025 | 1,4,5,7,26, 2,3,6,8,25,<br>27,29,30 28,31,32 | 3 P21588,P36376,P97840               |
| 5026 | 1,4,5,7,26, 2,3,6,8,25,<br>27,29,31 28,30,32 | 1 Q68G31                             |
| 5027 | 1,4,5,7,26, 2,3,6,8,25,<br>27,29,32 28,30,31 | 2 P36376,Q03191                      |
| 5028 | 1,4,5,7,26, 2,3,6,8,25,<br>27,30,31 28,29,32 | 0                                    |

|      |                                              |                                                                         |
|------|----------------------------------------------|-------------------------------------------------------------------------|
| 5029 | 1,4,5,7,26, 2,3,6,8,25,<br>27,30,32 28,29,31 | 2 P36376,Q03191                                                         |
| 5030 | 1,4,5,7,26, 2,3,6,8,25,<br>27,31,32 28,29,30 | 3 P23739,Q03191,Q9Z0J6                                                  |
| 5031 | 1,4,5,7,26, 2,3,6,8,25,<br>28,29,30 27,31,32 | 1 P97840                                                                |
| 5032 | 1,4,5,7,26, 2,3,6,8,25,<br>28,29,31 27,30,32 | 3 P02625,P97840,Q68G31                                                  |
| 5033 | 1,4,5,7,26, 2,3,6,8,25,<br>28,29,32 27,30,31 | 1 P97840                                                                |
| 5034 | 1,4,5,7,26, 2,3,6,8,25,<br>28,30,31 27,29,32 | 0                                                                       |
| 5035 | 1,4,5,7,26, 2,3,6,8,25,<br>28,30,32 27,29,31 | 2 P97840,Q9R168                                                         |
| 5036 | 1,4,5,7,26, 2,3,6,8,25,<br>28,31,32 27,29,30 | 1 O54728                                                                |
| 5037 | 1,4,5,7,26, 2,3,6,8,25,<br>29,30,31 27,28,32 | 2 P36860,Q9QWN8                                                         |
| 5038 | 1,4,5,7,26, 2,3,6,8,25,<br>29,30,32 27,28,31 | 3 P36376,P36860,Q9R168                                                  |
| 5039 | 1,4,5,7,26, 2,3,6,8,25,<br>29,31,32 27,28,30 | 1 P36860                                                                |
| 5040 | 1,4,5,7,26, 2,3,6,8,25,<br>30,31,32 27,28,29 | 3 P25809,P36860,Q9WVK7                                                  |
| 5041 | 1,4,5,7,27, 2,3,6,8,25,<br>28,29,30 26,31,32 | 3 P47967,P97840,Q99MH3                                                  |
| 5042 | 1,4,5,7,27, 2,3,6,8,25,<br>28,29,31 26,30,32 | 3 P97840,Q68G31,Q99MH3                                                  |
| 5043 | 1,4,5,7,27, 2,3,6,8,25,<br>28,29,32 26,30,31 | 8 O35547,P47967,P97840,Q03191,Q62761;Q62762;Q62763,Q6AYR9,Q812E4,Q99MH3 |
| 5044 | 1,4,5,7,27, 2,3,6,8,25,<br>28,30,31 26,29,32 | 2 P08649,P23739                                                         |
| 5045 | 1,4,5,7,27, 2,3,6,8,25,<br>28,30,32 26,29,31 | 3 P97840,Q03191,Q8VD89                                                  |
| 5046 | 1,4,5,7,27, 2,3,6,8,25,<br>28,31,32 26,29,30 | 3 P23739,Q03191,Q62761;Q62762;Q62763                                    |
| 5047 | 1,4,5,7,27, 2,3,6,8,25,<br>29,30,31 26,28,32 | 2 P08649,Q99MH3                                                         |
| 5048 | 1,4,5,7,27, 2,3,6,8,25,<br>29,30,32 26,28,31 | 3 P08649,P36376,Q03191                                                  |

|      |                                              |                                             |
|------|----------------------------------------------|---------------------------------------------|
| 5049 | 1,4,5,7,27, 2,3,6,8,25,<br>29,31,32 26,28,30 | 4 P08649,P80299,Q03191,Q99MH3               |
| 5050 | 1,4,5,7,27, 2,3,6,8,25,<br>30,31,32 26,28,29 | 6 P08649,P23739,P36860,Q03191,Q9QYP1,Q9Z0J6 |
| 5051 | 1,4,5,7,28, 2,3,6,8,25,<br>29,30,31 26,27,32 | 1 P08649                                    |
| 5052 | 1,4,5,7,28, 2,3,6,8,25,<br>29,30,32 26,27,31 | 2 P97840,Q5BJY9                             |
| 5053 | 1,4,5,7,28, 2,3,6,8,25,<br>29,31,32 26,27,30 | 0                                           |
| 5054 | 1,4,5,7,28, 2,3,6,8,25,<br>30,31,32 26,27,29 | 1 Q5BJY9                                    |
| 5055 | 1,4,5,7,29, 2,3,6,8,25,<br>30,31,32 26,27,28 | 6 P08649,P17559,P26342,P36860,P63081,Q5BJY9 |
| 5056 | 1,4,5,8,25, 2,3,6,7,29,<br>26,27,28 30,31,32 | 3 P01835,P20766,P26342                      |
| 5057 | 1,4,5,8,25, 2,3,6,7,28,<br>26,27,29 30,31,32 | 2 P06760,P22006                             |
| 5058 | 1,4,5,8,25, 2,3,6,7,28,<br>26,27,30 29,31,32 | 4 P01835,Q4FZU2,Q6IMF3,Q6P6Q2               |
| 5059 | 1,4,5,8,25, 2,3,6,7,28,<br>26,27,31 29,30,32 | 3 P01835,P23739,P54921                      |
| 5060 | 1,4,5,8,25, 2,3,6,7,28,<br>26,27,32 29,30,31 | 3 P01681,P01835,P13432                      |
| 5061 | 1,4,5,8,25, 2,3,6,7,27,<br>26,28,29 30,31,32 | 3 P06760,P20766,P80299                      |
| 5062 | 1,4,5,8,25, 2,3,6,7,27,<br>26,28,30 29,31,32 | 3 P20766,P80299,Q6P6Q2                      |
| 5063 | 1,4,5,8,25, 2,3,6,7,27,<br>26,28,31 29,30,32 | 0                                           |
| 5064 | 1,4,5,8,25, 2,3,6,7,27,<br>26,28,32 29,30,31 | 4 O54728,P01681,P13432,P20766               |
| 5065 | 1,4,5,8,25, 2,3,6,7,27,<br>26,29,30 28,31,32 | 6 P20766,P22006,P80299,Q4FZU2,Q6IMF3,Q6P6Q2 |
| 5066 | 1,4,5,8,25, 2,3,6,7,27,<br>26,29,31 28,30,32 | 0                                           |
| 5067 | 1,4,5,8,25, 2,3,6,7,27,<br>26,29,32 28,30,31 | 3 P00507,P13432,P20766                      |
| 5068 | 1,4,5,8,25, 2,3,6,7,27,<br>26,30,31 28,29,32 | 5 P54921,Q6AY61,Q6IMF3,Q6P6Q2,Q9WVK7        |

|      |                                              |                                                                  |
|------|----------------------------------------------|------------------------------------------------------------------|
| 5069 | 1,4,5,8,25, 2,3,6,7,27,<br>26,30,32 28,29,31 | 6 O88797,P00507,P01681,P20766,Q6P6Q2,Q9WVK7                      |
| 5070 | 1,4,5,8,25, 2,3,6,7,27,<br>26,31,32 28,29,30 | 5 O54728,P00507,P01681,P13432,Q9WVK7                             |
| 5071 | 1,4,5,8,25, 2,3,6,7,26,<br>27,28,29 30,31,32 | 3 P20766,Q812E4,Q99MH3                                           |
| 5072 | 1,4,5,8,25, 2,3,6,7,26,<br>27,28,30 29,31,32 | 4 P01835,P20766,Q6IMF3,Q6P6Q2                                    |
| 5073 | 1,4,5,8,25, 2,3,6,7,26,<br>27,28,31 29,30,32 | 2 P01835,P23739                                                  |
| 5074 | 1,4,5,8,25, 2,3,6,7,26,<br>27,28,32 29,30,31 | 5 P01681,P01835,P20766,Q6AYR9,Q9QWN8                             |
| 5075 | 1,4,5,8,25, 2,3,6,7,26,<br>27,29,30 28,31,32 | 8 P20766,Q4FZU2,Q6IFU7,Q6IFU8,Q6IFW6,Q6IG02,Q6IMF3,Q6P6Q2        |
| 5076 | 1,4,5,8,25, 2,3,6,7,26,<br>27,29,31 28,30,32 | 2 P23739,Q99MH3                                                  |
| 5077 | 1,4,5,8,25, 2,3,6,7,26,<br>27,29,32 28,30,31 | 3 P01681,P13432,P20766                                           |
| 5078 | 1,4,5,8,25, 2,3,6,7,26,<br>27,30,31 28,29,32 | 9 P01835,P23739,P54921,Q4FZU2,Q6IFU8,Q6IFW6,Q6IMF3,Q6P6Q2,Q9QYP1 |
| 5079 | 1,4,5,8,25, 2,3,6,7,26,<br>27,30,32 28,29,31 | 7 P01681,P01835,P20766,Q03191,Q4FZU2,Q6IMF3,Q6P6Q2               |
| 5080 | 1,4,5,8,25, 2,3,6,7,26,<br>27,31,32 28,29,30 | 4 P01681,P01835,P23739,Q03191                                    |
| 5081 | 1,4,5,8,25, 2,3,6,7,26,<br>28,29,30 27,31,32 | 3 P20766,Q6IMF3,Q6P6Q2                                           |
| 5082 | 1,4,5,8,25, 2,3,6,7,26,<br>28,29,31 27,30,32 | 0                                                                |
| 5083 | 1,4,5,8,25, 2,3,6,7,26,<br>28,29,32 27,30,31 | 2 P01681,P20766                                                  |
| 5084 | 1,4,5,8,25, 2,3,6,7,26,<br>28,30,31 27,29,32 | 2 Q6IMF3,Q6P6Q2                                                  |
| 5085 | 1,4,5,8,25, 2,3,6,7,26,<br>28,30,32 27,29,31 | 3 P01681,P20766,Q6P6Q2                                           |
| 5086 | 1,4,5,8,25, 2,3,6,7,26,<br>28,31,32 27,29,30 | 2 P01681,Q811M5                                                  |
| 5087 | 1,4,5,8,25, 2,3,6,7,26,<br>29,30,31 27,28,32 | 4 Q4FZU2,Q6IFW6,Q6IMF3,Q6P6Q2                                    |
| 5088 | 1,4,5,8,25, 2,3,6,7,26,<br>29,30,32 27,28,31 | 7 O88797,P01681,P20766,Q4FZU2,Q62894,Q6IMF3,Q6P6Q2               |

|      |                                              |                                      |
|------|----------------------------------------------|--------------------------------------|
| 5089 | 1,4,5,8,25, 2,3,6,7,26,<br>29,31,32 27,28,30 | 2 P01681,P13432                      |
| 5090 | 1,4,5,8,25, 2,3,6,7,26,<br>30,31,32 27,28,29 | 5 P01681,Q4FZU2,Q6IMF3,Q6P6Q2,Q9WVK7 |
| 5091 | 1,4,5,8,26, 2,3,6,7,25,<br>27,28,29 30,31,32 | 3 P06760,P20766,Q6P6R2               |
| 5092 | 1,4,5,8,26, 2,3,6,7,25,<br>27,28,30 29,31,32 | 2 P20766,Q6P6Q2                      |
| 5093 | 1,4,5,8,26, 2,3,6,7,25,<br>27,28,31 29,30,32 | 1 P23739                             |
| 5094 | 1,4,5,8,26, 2,3,6,7,25,<br>27,28,32 29,30,31 | 4 O54728,P20766,Q6AYR9,Q9QWN8        |
| 5095 | 1,4,5,8,26, 2,3,6,7,25,<br>27,29,30 28,31,32 | 5 P20766,Q6IFU8,Q6IG02,Q6IMF3,Q6P6Q2 |
| 5096 | 1,4,5,8,26, 2,3,6,7,25,<br>27,29,31 28,30,32 | 0                                    |
| 5097 | 1,4,5,8,26, 2,3,6,7,25,<br>27,29,32 28,30,31 | 1 P20766                             |
| 5098 | 1,4,5,8,26, 2,3,6,7,25,<br>27,30,31 28,29,32 | 4 P23739,Q6AY61,Q6IMF3,Q6P6Q2        |
| 5099 | 1,4,5,8,26, 2,3,6,7,25,<br>27,30,32 28,29,31 | 2 Q6IMF3,Q6P6Q2                      |
| 5100 | 1,4,5,8,26, 2,3,6,7,25,<br>27,31,32 28,29,30 | 2 O54728,P23739                      |
| 5101 | 1,4,5,8,26, 2,3,6,7,25,<br>28,29,30 27,31,32 | 2 P20766,Q6P6Q2                      |
| 5102 | 1,4,5,8,26, 2,3,6,7,25,<br>28,29,31 27,30,32 | 0                                    |
| 5103 | 1,4,5,8,26, 2,3,6,7,25,<br>28,29,32 27,30,31 | 2 O54728,P20766                      |
| 5104 | 1,4,5,8,26, 2,3,6,7,25,<br>28,30,31 27,29,32 | 1 Q6P6Q2                             |
| 5105 | 1,4,5,8,26, 2,3,6,7,25,<br>28,30,32 27,29,31 | 3 O54728,P20766,Q8VD89               |
| 5106 | 1,4,5,8,26, 2,3,6,7,25,<br>28,31,32 27,29,30 | 1 O54728                             |
| 5107 | 1,4,5,8,26, 2,3,6,7,25,<br>29,30,31 27,28,32 | 3 Q5RJR2,Q6IMF3,Q6P6Q2               |
| 5108 | 1,4,5,8,26, 2,3,6,7,25,<br>29,30,32 27,28,31 | 4 O88797,P20766,Q6IMF3,Q6P6Q2        |

|      |                                              |                                                    |
|------|----------------------------------------------|----------------------------------------------------|
| 5109 | 1,4,5,8,26, 2,3,6,7,25,<br>29,31,32 27,28,30 | 1 O54728                                           |
| 5110 | 1,4,5,8,26, 2,3,6,7,25,<br>30,31,32 27,28,29 | 4 O54728,P63081,Q6P6Q2,Q9WVK7                      |
| 5111 | 1,4,5,8,27, 2,3,6,7,25,<br>28,29,30 26,31,32 | 5 P19218,P20766,Q6IG02,Q6IMF3,Q6P6Q2               |
| 5112 | 1,4,5,8,27, 2,3,6,7,25,<br>28,29,31 26,30,32 | 1 Q99MH3                                           |
| 5113 | 1,4,5,8,27, 2,3,6,7,25,<br>28,29,32 26,30,31 | 5 O35547,P04905,P20766,Q6AYR9,Q812E4               |
| 5114 | 1,4,5,8,27, 2,3,6,7,25,<br>28,30,31 26,29,32 | 4 P19218,P23739,Q6IMF3,Q6P6Q2                      |
| 5115 | 1,4,5,8,27, 2,3,6,7,25,<br>28,30,32 26,29,31 | 7 B0LT89,P19218,P20766,Q6AYR9,Q6IMF3,Q6P6Q2,Q8VD89 |
| 5116 | 1,4,5,8,27, 2,3,6,7,25,<br>28,31,32 26,29,30 | 1 P23739                                           |
| 5117 | 1,4,5,8,27, 2,3,6,7,25,<br>29,30,31 26,28,32 | 7 P23739,Q4FZU2,Q6IFU8,Q6IFW6,Q6IG02,Q6IMF3,Q6P6Q2 |
| 5118 | 1,4,5,8,27, 2,3,6,7,25,<br>29,30,32 26,28,31 | 6 P20766,Q4FZU2,Q6IFU8,Q6IG02,Q6IMF3,Q6P6Q2        |
| 5119 | 1,4,5,8,27, 2,3,6,7,25,<br>29,31,32 26,28,30 | 1 P23739                                           |
| 5120 | 1,4,5,8,27, 2,3,6,7,25,<br>30,31,32 26,28,29 | 4 P23739,Q4FZU2,Q6IMF3,Q6P6Q2                      |
| 5121 | 1,4,5,8,28, 2,3,6,7,25,<br>29,30,31 26,27,32 | 2 Q6IMF3,Q6P6Q2                                    |
| 5122 | 1,4,5,8,28, 2,3,6,7,25,<br>29,30,32 26,27,31 | 4 P20766,Q62894,Q6IMF3,Q6P6Q2                      |
| 5123 | 1,4,5,8,28, 2,3,6,7,25,<br>29,31,32 26,27,30 | 0                                                  |
| 5124 | 1,4,5,8,28, 2,3,6,7,25,<br>30,31,32 26,27,29 | 2 Q6P6Q2,Q8VD89                                    |
| 5125 | 1,4,5,8,29, 2,3,6,7,25,<br>30,31,32 26,27,28 | 5 P36860,P63081,Q4FZU2,Q6IMF3,Q6P6Q2               |
| 5126 | 1,4,5,25,2 2,3,6,7,8,3<br>6,27,28,29 0,31,32 | 6 O89117,P02625,P20646,P20766,P35280,P97615        |
| 5127 | 1,4,5,25,2 2,3,6,7,8,2<br>6,27,28,30 9,31,32 | 2 P20766,P21588                                    |
| 5128 | 1,4,5,25,2 2,3,6,7,8,2<br>6,27,28,31 9,30,32 | 2 P23739,P35280                                    |

|      |                                              |                                                           |
|------|----------------------------------------------|-----------------------------------------------------------|
| 5129 | 1,4,5,25,2 2,3,6,7,8,2<br>6,27,28,32 9,30,31 | 3 P20766,P62804,Q9QWN8                                    |
| 5130 | 1,4,5,25,2 2,3,6,7,8,2<br>6,27,29,30 8,31,32 | 3 O89117,P20766,P21588                                    |
| 5131 | 1,4,5,25,2 2,3,6,7,8,2<br>6,27,29,31 8,30,32 | 2 O89117,P35280                                           |
| 5132 | 1,4,5,25,2 2,3,6,7,8,2<br>6,27,29,32 8,30,31 | 1 P20766                                                  |
| 5133 | 1,4,5,25,2 2,3,6,7,8,2<br>6,27,30,31 8,29,32 | 4 P23739,P54921,P62804,Q9QYP1                             |
| 5134 | 1,4,5,25,2 2,3,6,7,8,2<br>6,27,30,32 8,29,31 | 3 P20766,P21674,P62804                                    |
| 5135 | 1,4,5,25,2 2,3,6,7,8,2<br>6,27,31,32 8,29,30 | 4 P23739,P62804,Q03191,Q9QYP1                             |
| 5136 | 1,4,5,25,2 2,3,6,7,8,2<br>6,28,29,30 7,31,32 | 2 P20766,Q9QZK9                                           |
| 5137 | 1,4,5,25,2 2,3,6,7,8,2<br>6,28,29,31 7,30,32 | 1 P35280                                                  |
| 5138 | 1,4,5,25,2 2,3,6,7,8,2<br>6,28,29,32 7,30,31 | 2 P20766,Q62894                                           |
| 5139 | 1,4,5,25,2 2,3,6,7,8,2<br>6,28,30,31 7,29,32 | 1 P25809                                                  |
| 5140 | 1,4,5,25,2 2,3,6,7,8,2<br>6,28,30,32 7,29,31 | 4 P20766,P50115,Q00715,Q62894                             |
| 5141 | 1,4,5,25,2 2,3,6,7,8,2<br>6,28,31,32 7,29,30 | 3 O54728,P00731,P62804                                    |
| 5142 | 1,4,5,25,2 2,3,6,7,8,2<br>6,29,30,31 7,28,32 | 0                                                         |
| 5143 | 1,4,5,25,2 2,3,6,7,8,2<br>6,29,30,32 7,28,31 | 3 P20766,P50115,Q62894                                    |
| 5144 | 1,4,5,25,2 2,3,6,7,8,2<br>6,29,31,32 7,28,30 | 3 P00507,P19218,P62804                                    |
| 5145 | 1,4,5,25,2 2,3,6,7,8,2<br>6,30,31,32 7,28,29 | 8 P00507,P04636,P25809,P50115,P62804,Q00715,Q4G075,Q9WVK7 |
| 5146 | 1,4,5,25,2 2,3,6,7,8,2<br>7,28,29,30 6,31,32 | 3 O89117,P20766,Q99MH3                                    |
| 5147 | 1,4,5,25,2 2,3,6,7,8,2<br>7,28,29,31 6,30,32 | 4 O89117,P35280,P97615,Q99MH3                             |
| 5148 | 1,4,5,25,2 2,3,6,7,8,2<br>7,28,29,32 6,30,31 | 5 O35547,P20766,Q62761;Q62762;Q62763,Q8CGS4,Q99MH3        |



|      |                                              |                                                    |
|------|----------------------------------------------|----------------------------------------------------|
| 5149 | 1,4,5,25,2 2,3,6,7,8,2<br>7,28,30,31 6,29,32 | 2 P23739,Q9QYP1                                    |
| 5150 | 1,4,5,25,2 2,3,6,7,8,2<br>7,28,30,32 6,29,31 | 1 P20766                                           |
| 5151 | 1,4,5,25,2 2,3,6,7,8,2<br>7,28,31,32 6,29,30 | 3 P23739,P62804,Q03191                             |
| 5152 | 1,4,5,25,2 2,3,6,7,8,2<br>7,29,30,31 6,28,32 | 1 Q9QYP1                                           |
| 5153 | 1,4,5,25,2 2,3,6,7,8,2<br>7,29,30,32 6,28,31 | 2 P20766,Q63598                                    |
| 5154 | 1,4,5,25,2 2,3,6,7,8,2<br>7,29,31,32 6,28,30 | 3 P23739,P62804,Q99MH3                             |
| 5155 | 1,4,5,25,2 2,3,6,7,8,2<br>7,30,31,32 6,28,29 | 7 P23739,P62804,Q00715,Q03191,Q6P6R2,Q9QYP1,Q9WTT6 |
| 5156 | 1,4,5,25,2 2,3,6,7,8,2<br>8,29,30,31 6,27,32 | 1 P50115                                           |
| 5157 | 1,4,5,25,2 2,3,6,7,8,2<br>8,29,30,32 6,27,31 | 4 P20766,P50115,Q5BJY9,Q62894                      |
| 5158 | 1,4,5,25,2 2,3,6,7,8,2<br>8,29,31,32 6,27,30 | 1 P50115                                           |
| 5159 | 1,4,5,25,2 2,3,6,7,8,2<br>8,30,31,32 6,27,29 | 5 P25809,P50115,P62804,Q00715,Q9WTT6               |
| 5160 | 1,4,5,25,2 2,3,6,7,8,2<br>9,30,31,32 6,27,28 | 7 P07150,P25809,P36860,P50115,Q5BJY9,Q9WTT6,Q9WVK7 |
| 5161 | 1,4,5,26,2 2,3,6,7,8,2<br>7,28,29,30 5,31,32 | 2 P20766,P21588                                    |
| 5162 | 1,4,5,26,2 2,3,6,7,8,2<br>7,28,29,31 5,30,32 | 4 P02625,P02631,P35280,P97615                      |
| 5163 | 1,4,5,26,2 2,3,6,7,8,2<br>7,28,29,32 5,30,31 | 2 P20766,Q62761;Q62762;Q62763                      |
| 5164 | 1,4,5,26,2 2,3,6,7,8,2<br>7,28,30,31 5,29,32 | 0                                                  |
| 5165 | 1,4,5,26,2 2,3,6,7,8,2<br>7,28,30,32 5,29,31 | 2 P20766,Q8VD89                                    |
| 5166 | 1,4,5,26,2 2,3,6,7,8,2<br>7,28,31,32 5,29,30 | 3 O54728,P23739,P62804                             |
| 5167 | 1,4,5,26,2 2,3,6,7,8,2<br>7,29,30,31 5,28,32 | 2 P02631,P36860                                    |
| 5168 | 1,4,5,26,2 2,3,6,7,8,2<br>7,29,30,32 5,28,31 | 2 P20766,P36376                                    |

|      |                                              |                                                                                                                                  |
|------|----------------------------------------------|----------------------------------------------------------------------------------------------------------------------------------|
| 5169 | 1,4,5,26,2 2,3,6,7,8,2<br>7,29,31,32 5,28,30 | 3 O70417,P02631,P62804                                                                                                           |
| 5170 | 1,4,5,26,2 2,3,6,7,8,2<br>7,30,31,32 5,28,29 | 5 P02631,P23739,P36860,P62804,Q00715                                                                                             |
| 5171 | 1,4,5,26,2 2,3,6,7,8,2<br>8,29,30,31 5,27,32 | 1 P50115                                                                                                                         |
| 5172 | 1,4,5,26,2 2,3,6,7,8,2<br>8,29,30,32 5,27,31 | 3 P20766,P50115,Q62894                                                                                                           |
| 5173 | 1,4,5,26,2 2,3,6,7,8,2<br>8,29,31,32 5,27,30 | 3 O54728,O70417,P50115                                                                                                           |
| 5174 | 1,4,5,26,2 2,3,6,7,8,2<br>8,30,31,32 5,27,29 | 6 O54728,P50115,P62804,Q00715,Q4G075,Q8VD89                                                                                      |
| 5175 | 1,4,5,26,2 2,3,6,7,8,2<br>9,30,31,32 5,27,28 | 6 P02631,P36860,P50115,P62804,P63081,Q5QE79                                                                                      |
| 5176 | 1,4,5,27,2 2,3,6,7,8,2<br>8,29,30,31 5,26,32 | 2 P08649,Q99MH3                                                                                                                  |
| 5177 | 1,4,5,27,2 2,3,6,7,8,2<br>8,29,30,32 5,26,31 | 1 P20766                                                                                                                         |
| 5178 | 1,4,5,27,2 2,3,6,7,8,2<br>8,29,31,32 5,26,30 | 4 O35547,P36374,Q62761;Q62762;Q62763,Q99MH3                                                                                      |
| 5179 | 1,4,5,27,2 2,3,6,7,8,2<br>8,30,31,32 5,26,29 | 3 P23739,P62804,Q8VD89                                                                                                           |
| 5180 | 1,4,5,27,2 2,3,6,7,8,2<br>9,30,31,32 5,26,28 | 2 P08649,P36860                                                                                                                  |
| 5181 | 1,4,5,28,2 2,3,6,7,8,2<br>9,30,31,32 5,26,27 | 6 P17559,P36860,P50115,P63081,Q5BJY9,Q62894                                                                                      |
| 5182 | 1,4,6,7,8,2 2,3,5,28,2<br>5,26,27 9,30,31,32 | 10 P06761,P06911,P11598,P13432,P15399,P22273,P22282,Q4G075,Q99041,Q9WTT6                                                         |
| 5183 | 1,4,6,7,8,2 2,3,5,27,2<br>5,26,28 9,30,31,32 | 11 P06761,P06911,P08649,P11598,P22273,P22282,Q63617,Q99041,Q9JI85,Q9QW07,Q9WTT6                                                  |
| 5184 | 1,4,6,7,8,2 2,3,5,27,2<br>5,26,29 8,30,31,32 | 7 P06911,P13432,P22273,P48032,P49134,P70549,Q9QX74                                                                               |
| 5185 | 1,4,6,7,8,2 2,3,5,27,2<br>5,26,30 8,29,31,32 | 4 P06911,P49134,Q6AY61,Q99041                                                                                                    |
| 5186 | 1,4,6,7,8,2 2,3,5,27,2<br>5,26,31 8,29,30,32 | 5 P06911,P12020,P13432,P49134,P57113                                                                                             |
| 5187 | 1,4,6,7,8,2 2,3,5,27,2<br>5,26,32 8,29,30,31 | 5 P06911,P11598,P13432,Q99041,Q9WVK7                                                                                             |
| 5188 | 1,4,6,7,8,2 2,3,5,26,2<br>5,27,28 9,30,31,32 | 18 P06761,P06911,P0C0A9,P11598,P19629,P22273,P22282,P22283,P63081,Q4G075,Q5GRG2,Q5M8C6,Q63617,Q6AYR9,Q812E4,Q99041,Q9JI85,Q9QW07 |

|      |                                              |    |                                                                                                                                             |
|------|----------------------------------------------|----|---------------------------------------------------------------------------------------------------------------------------------------------|
| 5189 | 1,4,6,7,8,2 2,3,5,26,2<br>5,27,29 8,30,31,32 | 9  | P06761,P06911,P11598,P22273,P22282,P22283,Q4G075,Q63617,Q99041                                                                              |
| 5190 | 1,4,6,7,8,2 2,3,5,26,2<br>5,27,30 8,29,31,32 | 6  | O70417,P06911,P22273,P22282,Q99041,Q99376                                                                                                   |
| 5191 | 1,4,6,7,8,2 2,3,5,26,2<br>5,27,31 8,29,30,32 | 7  | P06911,P12020,P22273,P22282,Q5GRG2,Q99041,Q9QYP1                                                                                            |
| 5192 | 1,4,6,7,8,2 2,3,5,26,2<br>5,27,32 8,29,30,31 | 11 | P00714,P06911,P0C0A9,P11598,P13432,P22273,P22282,P98166,Q01984,Q99041,Q9JHB9                                                                |
| 5193 | 1,4,6,7,8,2 2,3,5,26,2<br>5,28,29 7,30,31,32 | 20 | P06761,P06911,P0C0A9,P11598,P12020,P21674,P22273,P22282,P22283,P47727,P48032,Q5GRG2,Q5M8C6,Q63493,Q63617,Q812E4,Q99041,Q9JI85,Q9QW07,Q9Z2L0 |
| 5194 | 1,4,6,7,8,2 2,3,5,26,2<br>5,28,30 7,29,31,32 | 7  | O70417,P06911,P11598,P22282,Q63617,Q99041,Q9QW07                                                                                            |
| 5195 | 1,4,6,7,8,2 2,3,5,26,2<br>5,28,31 7,29,30,32 | 8  | P06911,P11598,P12020,P22282,Q5GRG2,Q63617,Q99041,Q9QW07                                                                                     |
| 5196 | 1,4,6,7,8,2 2,3,5,26,2<br>5,28,32 7,29,30,31 | 14 | P06761,P06911,P07647,P08723,P0C0A9,P11598,P13432,P22282,P22283,Q5M8C6,Q63617,Q99041,Q9JI85,Q9QW07                                           |
| 5197 | 1,4,6,7,8,2 2,3,5,26,2<br>5,29,30 7,28,31,32 | 3  | P06911,P48032,Q99041                                                                                                                        |
| 5198 | 1,4,6,7,8,2 2,3,5,26,2<br>5,29,31 7,28,30,32 | 3  | P06911,P12020,Q5GRG2                                                                                                                        |
| 5199 | 1,4,6,7,8,2 2,3,5,26,2<br>5,29,32 7,28,30,31 | 4  | P06911,P11598,P13432,P22282                                                                                                                 |
| 5200 | 1,4,6,7,8,2 2,3,5,26,2<br>5,30,31 7,28,29,32 | 4  | P06911,P12020,Q6AY61,Q9WVK7                                                                                                                 |
| 5201 | 1,4,6,7,8,2 2,3,5,26,2<br>5,30,32 7,28,29,31 | 4  | P06911,Q5PQL7,Q99041,Q9WVK7                                                                                                                 |
| 5202 | 1,4,6,7,8,2 2,3,5,26,2<br>5,31,32 7,28,29,30 | 4  | P06911,P12020,P13432,Q9WVK7                                                                                                                 |
| 5203 | 1,4,6,7,8,2 2,3,5,25,2<br>6,27,28 9,30,31,32 | 15 | P02782,P06761,P06911,P07150,P11598,P15399,P22273,P22282,P22283,Q63617,Q6AYR9,Q99041,Q9JI85,Q9QW07,Q9WTT6                                    |
| 5204 | 1,4,6,7,8,2 2,3,5,25,2<br>6,27,29 8,30,31,32 | 12 | P06761,P06911,P11598,P22273,P22282,P22283,P70549,Q4G075,Q63617,Q99041,Q9QX74,Q9WTT6                                                         |
| 5205 | 1,4,6,7,8,2 2,3,5,25,2<br>6,27,30 8,29,31,32 | 6  | P11598,P15399,P22273,P22282,Q30KJ2,Q99041                                                                                                   |
| 5206 | 1,4,6,7,8,2 2,3,5,25,2<br>6,27,31 8,29,30,32 | 6  | P06911,P11598,P22273,P22282,Q62894,Q99041                                                                                                   |
| 5207 | 1,4,6,7,8,2 2,3,5,25,2<br>6,27,32 8,29,30,31 | 8  | P06761,P11598,P13432,P15399,P18418,P22273,P22282,Q99041                                                                                     |
| 5208 | 1,4,6,7,8,2 2,3,5,25,2<br>6,28,29 7,30,31,32 | 18 | P06761,P06911,P11598,P20646,P21674,P22273,P22282,P22283,P49134,P70549,Q63493,Q63617,Q6P6R2,Q99041,Q9JI85,Q9QW07,Q9QX74,Q9WTT6               |

|      |                        |                          |    |                                                                                                                                                                         |
|------|------------------------|--------------------------|----|-------------------------------------------------------------------------------------------------------------------------------------------------------------------------|
| 5209 | 1,4,6,7,8,2<br>6,28,30 | 2,3,5,25,2<br>7,29,31,32 | 9  | P06911,P11598,P22273,P22282,P49134,Q63617,Q99041,Q9JI85,Q9QW07                                                                                                          |
| 5210 | 1,4,6,7,8,2<br>6,28,31 | 2,3,5,25,2<br>7,29,30,32 | 12 | P06761,P06911,P11598,P21674,P22273,P22282,P49134,P57113,Q63617,Q99041,Q9JI85,Q9QW07                                                                                     |
| 5211 | 1,4,6,7,8,2<br>6,28,32 | 2,3,5,25,2<br>7,29,30,31 | 13 | O54728,P06761,P06911,P08723,P11598,P18418,P22273,P22282,P22283,Q63617,Q99041,Q9JI85,Q9QW07                                                                              |
| 5212 | 1,4,6,7,8,2<br>6,29,30 | 2,3,5,25,2<br>7,28,31,32 | 3  | P49134,Q99041,Q9QX74                                                                                                                                                    |
| 5213 | 1,4,6,7,8,2<br>6,29,31 | 2,3,5,25,2<br>7,28,30,32 | 8  | P06911,P11598,P21674,P49134,P70549,Q63474,Q99041,Q9QX74                                                                                                                 |
| 5214 | 1,4,6,7,8,2<br>6,29,32 | 2,3,5,25,2<br>7,28,30,31 | 5  | P11598,P13432,P22282,Q63617,Q99041                                                                                                                                      |
| 5215 | 1,4,6,7,8,2<br>6,30,31 | 2,3,5,25,2<br>7,28,29,32 | 4  | P06911,P49134,Q6AY61,Q99041                                                                                                                                             |
| 5216 | 1,4,6,7,8,2<br>6,30,32 | 2,3,5,25,2<br>7,28,29,31 | 1  | Q99041                                                                                                                                                                  |
| 5217 | 1,4,6,7,8,2<br>6,31,32 | 2,3,5,25,2<br>7,28,29,30 | 6  | O54728,P11598,P13432,P22006,P57113,Q99041                                                                                                                               |
| 5218 | 1,4,6,7,8,2<br>7,28,29 | 2,3,5,25,2<br>6,30,31,32 | 22 | P02782,P06761,P06911,P08723,P0C0A9,P11598,P21674,P22273,P22282,P22283,P46462,P47727,Q4G075,Q5M8C6,Q63493,Q63617,Q6AYR9,Q812E4,Q99041,Q9JI85,Q9QW07,Q9Z2L0               |
| 5219 | 1,4,6,7,8,2<br>7,28,30 | 2,3,5,25,2<br>6,29,31,32 | 12 | P06761,P06911,P11598,P19218,P22273,P22282,P22283,Q63617,Q8VD89,Q99041,Q9JI85,Q9QW07                                                                                     |
| 5220 | 1,4,6,7,8,2<br>7,28,31 | 2,3,5,25,2<br>6,29,30,32 | 14 | P06761,P06911,P11598,P12020,P22273,P22282,P22283,Q5GRG2,Q63493,Q63617,Q99041,Q9JI85,Q9QW07,Q9QZK9                                                                       |
| 5221 | 1,4,6,7,8,2<br>7,28,32 | 2,3,5,25,2<br>6,29,30,31 | 24 | P02780,P02781,P04905,P06761,P06911,P07647,P08723,P0C0A9,P11598,P22273,P22282,P22283,P46462,Q5M8C6,Q62902,Q63493,Q63617,Q6AYR9,Q6RUV5,Q812E4,Q99041,Q9JI85,Q9QW07,Q9Z2L0 |
| 5222 | 1,4,6,7,8,2<br>7,29,30 | 2,3,5,25,2<br>6,28,31,32 | 8  | P06911,P11598,P19218,P22273,P22282,Q4G075,Q63617,Q99041                                                                                                                 |
| 5223 | 1,4,6,7,8,2<br>7,29,31 | 2,3,5,25,2<br>6,28,30,32 | 10 | P06761,P06911,P11598,P22273,P22282,P82471,Q4G075,Q63493,Q63617,Q99041                                                                                                   |
| 5224 | 1,4,6,7,8,2<br>7,29,32 | 2,3,5,25,2<br>6,28,30,31 | 12 | P00714,P06761,P06911,P11598,P22273,P22282,P22283,Q4G075,Q63493,Q63617,Q99041,Q9Z2L0                                                                                     |
| 5225 | 1,4,6,7,8,2<br>7,30,31 | 2,3,5,25,2<br>6,28,29,32 | 4  | P06911,P19218,P22282,Q99041                                                                                                                                             |
| 5226 | 1,4,6,7,8,2<br>7,30,32 | 2,3,5,25,2<br>6,28,29,31 | 6  | P00714,P11598,P19218,P22282,Q8VD89,Q99041                                                                                                                               |
| 5227 | 1,4,6,7,8,2<br>7,31,32 | 2,3,5,25,2<br>6,28,29,30 | 8  | P00714,P06911,P11598,P22006,P22282,P82471,Q99041,Q9QZK9                                                                                                                 |
| 5228 | 1,4,6,7,8,2<br>8,29,30 | 2,3,5,25,2<br>6,27,31,32 | 12 | P06761,P06911,P11598,P21674,P22273,P22282,P22283,Q63493,Q63617,Q99041,Q9JI85,Q9QW07                                                                                     |

|      |                         |                          |    |                                                                                                                                                                  |
|------|-------------------------|--------------------------|----|------------------------------------------------------------------------------------------------------------------------------------------------------------------|
| 5229 | 1,4,6,7,8,2<br>8,29,31  | 2,3,5,25,2<br>6,27,30,32 | 17 | P06761,P06911,P11598,P12020,P21674,P22273,P22282,P22283,P70549,P82471,Q5GRG2,Q63474,Q63493,Q63617,Q99041,Q9JI85,Q9QW07                                           |
| 5230 | 1,4,6,7,8,2<br>8,29,32  | 2,3,5,25,2<br>6,27,30,31 | 23 | P02780,P04905,P06761,P06911,P07647,P08723,P0C0A9,P11598,P21674,P22273,P22282,P22283,P30120,P47727,Q5M8C6,Q63493,Q63617,Q6AYR9,Q812E4,Q99041,Q9JI85,Q9QW07,Q9Z2L0 |
| 5231 | 1,4,6,7,8,2<br>8,30,31  | 2,3,5,25,2<br>6,27,29,32 |    | 7 P06911,P11598,P12020,P35745,P82471,Q63617,Q99041                                                                                                               |
| 5232 | 1,4,6,7,8,2<br>8,30,32  | 2,3,5,25,2<br>6,27,29,31 | 10 | P02780,P06911,P08723,P11598,P22282,Q63617,Q8VD89,Q99041,Q9JI85,Q9QW07                                                                                            |
| 5233 | 1,4,6,7,8,2<br>8,31,32  | 2,3,5,25,2<br>6,27,29,30 | 14 | P06911,P08723,P11598,P12020,P22006,P22282,P82471,Q63493,Q63532,Q63617,Q99041,Q9JI85,Q9QW07,Q9QZK9                                                                |
| 5234 | 1,4,6,7,8,2<br>9,30,31  | 2,3,5,25,2<br>6,27,28,32 |    | 7 P06911,P12020,P49134,P82471,Q5RJR2,Q63474,Q99041                                                                                                               |
| 5235 | 1,4,6,7,8,2<br>9,30,32  | 2,3,5,25,2<br>6,27,28,31 | 2  | P00714,Q99041                                                                                                                                                    |
| 5236 | 1,4,6,7,8,2<br>9,31,32  | 2,3,5,25,2<br>6,27,28,30 | 7  | P00714,P06911,P11598,P82471,Q63474,Q63493,Q99041                                                                                                                 |
| 5237 | 1,4,6,7,8,3<br>0,31,32  | 2,3,5,25,2<br>6,27,28,29 | 5  | P00714,P22006,P26342,P82471,Q99041                                                                                                                               |
| 5238 | 1,4,6,7,25,<br>26,27,28 | 2,3,5,8,29,<br>30,31,32  | 5  | P11598,P22283,P63081,Q63617,Q9QW07                                                                                                                               |
| 5239 | 1,4,6,7,25,<br>26,27,29 | 2,3,5,8,28,<br>30,31,32  | 2  | P36376,P70549                                                                                                                                                    |
| 5240 | 1,4,6,7,25,<br>26,27,30 | 2,3,5,8,28,<br>29,31,32  | 2  | P21588,P36376                                                                                                                                                    |
| 5241 | 1,4,6,7,25,<br>26,27,31 | 2,3,5,8,28,<br>29,30,32  | 1  | Q9QYP1                                                                                                                                                           |
| 5242 | 1,4,6,7,25,<br>26,27,32 | 2,3,5,8,28,<br>29,30,31  | 1  | P36376                                                                                                                                                           |
| 5243 | 1,4,6,7,25,<br>26,28,29 | 2,3,5,8,27,<br>30,31,32  | 5  | P11598,P20646,P70549,Q63617,Q9QW07                                                                                                                               |
| 5244 | 1,4,6,7,25,<br>26,28,30 | 2,3,5,8,27,<br>29,31,32  | 2  | Q5PQL7,Q62975                                                                                                                                                    |
| 5245 | 1,4,6,7,25,<br>26,28,31 | 2,3,5,8,27,<br>29,30,32  | 1  | Q6IFU7                                                                                                                                                           |
| 5246 | 1,4,6,7,25,<br>26,28,32 | 2,3,5,8,27,<br>29,30,31  | 7  | P00731,P07647,P11598,Q5PQL7,Q62975,Q6AYR8,Q9QW07                                                                                                                 |
| 5247 | 1,4,6,7,25,<br>26,29,30 | 2,3,5,8,27,<br>28,31,32  | 1  | P36376                                                                                                                                                           |
| 5248 | 1,4,6,7,25,<br>26,29,31 | 2,3,5,8,27,<br>28,30,32  | 1  | P70549                                                                                                                                                           |

|      |                                              |                                                                         |
|------|----------------------------------------------|-------------------------------------------------------------------------|
| 5249 | 1,4,6,7,25, 2,3,5,8,27,<br>26,29,32 28,30,31 | 2 P36376,Q6AYR8                                                         |
| 5250 | 1,4,6,7,25, 2,3,5,8,27,<br>26,30,31 28,29,32 | 3 P25809,Q9QYP1,Q9WVK7                                                  |
| 5251 | 1,4,6,7,25, 2,3,5,8,27,<br>26,30,32 28,29,31 | 5 P25809,P36376,Q5PQL7,Q9R168,Q9WVK7                                    |
| 5252 | 1,4,6,7,25, 2,3,5,8,27,<br>26,31,32 28,29,30 | 4 P00731,P25809,Q6IFU7,Q9WVK7                                           |
| 5253 | 1,4,6,7,25, 2,3,5,8,26,<br>27,28,29 30,31,32 | 9 P05539,P0C0A9,P11598,P22283,Q63617,Q812E4,Q99MH3,Q9QW07,Q9Z2L0        |
| 5254 | 1,4,6,7,25, 2,3,5,8,26,<br>27,28,30 29,31,32 | 0                                                                       |
| 5255 | 1,4,6,7,25, 2,3,5,8,26,<br>27,28,31 29,30,32 | 4 O88797,P11598,Q63617,Q9QYP1                                           |
| 5256 | 1,4,6,7,25, 2,3,5,8,26,<br>27,28,32 29,30,31 | 8 P07647,P0C0A9,P11598,P22283,Q62761;Q62762;Q62763,Q63617,Q6AYR9,Q9QW07 |
| 5257 | 1,4,6,7,25, 2,3,5,8,26,<br>27,29,30 28,31,32 | 1 P36376                                                                |
| 5258 | 1,4,6,7,25, 2,3,5,8,26,<br>27,29,31 28,30,32 | 1 Q9QYP1                                                                |
| 5259 | 1,4,6,7,25, 2,3,5,8,26,<br>27,29,32 28,30,31 | 3 P00714,P36376,Q6AYR8                                                  |
| 5260 | 1,4,6,7,25, 2,3,5,8,26,<br>27,30,31 28,29,32 | 1 Q9QYP1                                                                |
| 5261 | 1,4,6,7,25, 2,3,5,8,26,<br>27,30,32 28,29,31 | 2 P36376,Q99376                                                         |
| 5262 | 1,4,6,7,25, 2,3,5,8,26,<br>27,31,32 28,29,30 | 1 Q9QYP1                                                                |
| 5263 | 1,4,6,7,25, 2,3,5,8,26,<br>28,29,30 27,31,32 | 2 Q63617,Q9QW07                                                         |
| 5264 | 1,4,6,7,25, 2,3,5,8,26,<br>28,29,31 27,30,32 | 2 P70549,Q63617                                                         |
| 5265 | 1,4,6,7,25, 2,3,5,8,26,<br>28,29,32 27,30,31 | 9 P07647,P08723,P0C0A9,P11598,P22283,Q63617,Q6AYR8,Q9QW07,Q9Z2L0        |
| 5266 | 1,4,6,7,25, 2,3,5,8,26,<br>28,30,31 27,29,32 | 2 P25809,Q9JJ50                                                         |
| 5267 | 1,4,6,7,25, 2,3,5,8,26,<br>28,30,32 27,29,31 | 3 Q5PQL7,Q62975,Q9R168                                                  |
| 5268 | 1,4,6,7,25, 2,3,5,8,26,<br>28,31,32 27,29,30 | 4 P00731,P11598,P22006,P25809                                           |

|      |                                              |                                                                  |
|------|----------------------------------------------|------------------------------------------------------------------|
| 5269 | 1,4,6,7,25, 2,3,5,8,26,<br>29,30,31 27,28,32 | 2 P25809,Q9QWN8                                                  |
| 5270 | 1,4,6,7,25, 2,3,5,8,26,<br>29,30,32 27,28,31 | 3 P36376,Q5BJY9,Q9R168                                           |
| 5271 | 1,4,6,7,25, 2,3,5,8,26,<br>29,31,32 27,28,30 | 1 Q6AYR8                                                         |
| 5272 | 1,4,6,7,25, 2,3,5,8,26,<br>30,31,32 27,28,29 | 7 P22006,P25809,P26342,P47967,Q6P6R2,Q9QYP1,Q9WVK7               |
| 5273 | 1,4,6,7,26, 2,3,5,8,25,<br>27,28,29 30,31,32 | 9 P02625,P11598,P20646,P21588,P22283,P36376,P70549,Q63617,Q9QW07 |
| 5274 | 1,4,6,7,26, 2,3,5,8,25,<br>27,28,30 29,31,32 | 6 P11598,P21588,P36376,Q63617,Q80WL1,Q8VD89                      |
| 5275 | 1,4,6,7,26, 2,3,5,8,25,<br>27,28,31 29,30,32 | 4 O88797,P11598,P22283,Q63617                                    |
| 5276 | 1,4,6,7,26, 2,3,5,8,25,<br>27,28,32 29,30,31 | 7 P11598,P22283,P36376,Q62761;Q62762;Q62763,Q63617,Q6AYR9,Q8CJ52 |
| 5277 | 1,4,6,7,26, 2,3,5,8,25,<br>27,29,30 28,31,32 | 4 P21588,P36376,Q80WL1,Q811M5                                    |
| 5278 | 1,4,6,7,26, 2,3,5,8,25,<br>27,29,31 28,30,32 | 1 P70549                                                         |
| 5279 | 1,4,6,7,26, 2,3,5,8,25,<br>27,29,32 28,30,31 | 3 P00714,P11598,P36376                                           |
| 5280 | 1,4,6,7,26, 2,3,5,8,25,<br>27,30,31 28,29,32 | 1 Q9QYP1                                                         |
| 5281 | 1,4,6,7,26, 2,3,5,8,25,<br>27,30,32 28,29,31 | 2 P36376,Q8VD89                                                  |
| 5282 | 1,4,6,7,26, 2,3,5,8,25,<br>27,31,32 28,29,30 | 2 P11598,P22006                                                  |
| 5283 | 1,4,6,7,26, 2,3,5,8,25,<br>28,29,30 27,31,32 | 4 P11598,P36376,Q63617,Q80WL1                                    |
| 5284 | 1,4,6,7,26, 2,3,5,8,25,<br>28,29,31 27,30,32 | 5 P11598,P21674,P70549,Q63474,Q63617                             |
| 5285 | 1,4,6,7,26, 2,3,5,8,25,<br>28,29,32 27,30,31 | 8 P07647,P11598,P22283,P36376,Q63617,Q6AYR8,Q8CJ52,Q9QW07        |
| 5286 | 1,4,6,7,26, 2,3,5,8,25,<br>28,30,31 27,29,32 | 0                                                                |
| 5287 | 1,4,6,7,26, 2,3,5,8,25,<br>28,30,32 27,29,31 | 4 P11598,P36376,Q8VD89,Q9R168                                    |
| 5288 | 1,4,6,7,26, 2,3,5,8,25,<br>28,31,32 27,29,30 | 5 O54728,P00731,P11598,P22006,Q6IFU7                             |

|      |                                              |                                                                                                                                                           |
|------|----------------------------------------------|-----------------------------------------------------------------------------------------------------------------------------------------------------------|
| 5289 | 1,4,6,7,26, 2,3,5,8,25,<br>29,30,31 27,28,32 | 3 B1H234,P36860,Q63474                                                                                                                                    |
| 5290 | 1,4,6,7,26, 2,3,5,8,25,<br>29,30,32 27,28,31 | 3 P36376,P36860,Q9R168                                                                                                                                    |
| 5291 | 1,4,6,7,26, 2,3,5,8,25,<br>29,31,32 27,28,30 | 3 P36376,P36860,Q63474                                                                                                                                    |
| 5292 | 1,4,6,7,26, 2,3,5,8,25,<br>30,31,32 27,28,29 | 4 P22006,P25809,P36860,Q9WVK7                                                                                                                             |
| 5293 | 1,4,6,7,27, 2,3,5,8,25,<br>28,29,30 26,31,32 | 5 P11598,P22283,P36376,Q63617,Q9Z2L0                                                                                                                      |
| 5294 | 1,4,6,7,27, 2,3,5,8,25,<br>28,29,31 26,30,32 | 5 O88797,P11598,P22283,P80299,Q63617                                                                                                                      |
| 5295 | 1,4,6,7,27, 2,3,5,8,25,<br>28,29,32 26,30,31 | 19 O08815,O35547,P00714,P00758,P07647,P08723,P0C0A9,P11598,P22283,P36374,P36376,P8155<br>6,Q62761;Q62762;Q62763,Q63617,Q6AYR9,Q812E4,Q8CGS4,Q9QW07,Q9Z2L0 |
| 5296 | 1,4,6,7,27, 2,3,5,8,25,<br>28,30,31 26,29,32 | 3 P11598,Q63617,Q8VD89                                                                                                                                    |
| 5297 | 1,4,6,7,27, 2,3,5,8,25,<br>28,30,32 26,29,31 | 6 P11598,P22283,P36376,Q63617,Q6AYR9,Q8VD89                                                                                                               |
| 5298 | 1,4,6,7,27, 2,3,5,8,25,<br>28,31,32 26,29,30 | 8 O88797,P11598,P22006,P22283,P36374,P80299,Q62761;Q62762;Q62763,Q63617                                                                                   |
| 5299 | 1,4,6,7,27, 2,3,5,8,25,<br>29,30,31 26,28,32 | 2 B1H234,P80299                                                                                                                                           |
| 5300 | 1,4,6,7,27, 2,3,5,8,25,<br>29,30,32 26,28,31 | 2 P00714,P36376                                                                                                                                           |
| 5301 | 1,4,6,7,27, 2,3,5,8,25,<br>29,31,32 26,28,30 | 3 P00714,P11598,P80299                                                                                                                                    |
| 5302 | 1,4,6,7,27, 2,3,5,8,25,<br>30,31,32 26,28,29 | 5 P00714,P22006,P80299,Q8VD89,Q9QYP1                                                                                                                      |
| 5303 | 1,4,6,7,28, 2,3,5,8,25,<br>29,30,31 26,27,32 | 3 B1H234,Q63474,Q63617                                                                                                                                    |
| 5304 | 1,4,6,7,28, 2,3,5,8,25,<br>29,30,32 26,27,31 | 4 P11598,P36376,Q5BJY9,Q63617                                                                                                                             |
| 5305 | 1,4,6,7,28, 2,3,5,8,25,<br>29,31,32 26,27,30 | 6 P11598,P22006,P22283,P80299,Q63474,Q63617                                                                                                               |
| 5306 | 1,4,6,7,28, 2,3,5,8,25,<br>30,31,32 26,27,29 | 3 P22006,P25809,Q8VD89                                                                                                                                    |
| 5307 | 1,4,6,7,29, 2,3,5,8,25,<br>30,31,32 26,27,28 | 7 B1H234,P00714,P26342,P36860,P80299,Q5BJY9,Q63474                                                                                                        |
| 5308 | 1,4,6,8,25, 2,3,5,7,29,<br>26,27,28 30,31,32 | 7 P06911,P08649,P15399,P22282,P26342,Q9JI85,Q9QW07                                                                                                        |



|      |                                              |                                                                                               |
|------|----------------------------------------------|-----------------------------------------------------------------------------------------------|
| 5309 | 1,4,6,8,25, 2,3,5,7,28,<br>26,27,29 30,31,32 | 3 P13432,P15399,P70549                                                                        |
| 5310 | 1,4,6,8,25, 2,3,5,7,28,<br>26,27,30 29,31,32 | 4 P15399,P54921,Q30KJ2,Q6AY61                                                                 |
| 5311 | 1,4,6,8,25, 2,3,5,7,28,<br>26,27,31 29,30,32 | 3 P15399,P47967,P54921                                                                        |
| 5312 | 1,4,6,8,25, 2,3,5,7,28,<br>26,27,32 29,30,31 | 3 P13432,P15399,P54921                                                                        |
| 5313 | 1,4,6,8,25, 2,3,5,7,27,<br>26,28,29 30,31,32 | 8 P06911,P08649,P13432,P20766,P70549,Q6P6R2,Q9JI85,Q9QW07                                     |
| 5314 | 1,4,6,8,25, 2,3,5,7,27,<br>26,28,30 29,31,32 | 4 P08649,P80299,Q6AY61,Q9QW07                                                                 |
| 5315 | 1,4,6,8,25, 2,3,5,7,27,<br>26,28,31 29,30,32 | 3 P06911,P08649,P70549                                                                        |
| 5316 | 1,4,6,8,25, 2,3,5,7,27,<br>26,28,32 29,30,31 | 5 O54728,P08649,P13432,Q9JI85,Q9QW07                                                          |
| 5317 | 1,4,6,8,25, 2,3,5,7,27,<br>26,29,30 28,31,32 | 1 Q6AY61                                                                                      |
| 5318 | 1,4,6,8,25, 2,3,5,7,27,<br>26,29,31 28,30,32 | 2 P13432,P70549                                                                               |
| 5319 | 1,4,6,8,25, 2,3,5,7,27,<br>26,29,32 28,30,31 | 2 P00507,P13432                                                                               |
| 5320 | 1,4,6,8,25, 2,3,5,7,27,<br>26,30,31 28,29,32 | 4 P47967,P54921,Q6AY61,Q9WVK7                                                                 |
| 5321 | 1,4,6,8,25, 2,3,5,7,27,<br>26,30,32 28,29,31 | 6 P00507,P13432,P47967,P54921,Q6AY61,Q9WVK7                                                   |
| 5322 | 1,4,6,8,25, 2,3,5,7,27,<br>26,31,32 28,29,30 | 6 O54728,P00507,P13432,P47967,P54921,Q9WVK7                                                   |
| 5323 | 1,4,6,8,25, 2,3,5,7,26,<br>27,28,29 30,31,32 | 10 P06911,P0C0A9,P20766,P22282,P47727,Q6AYR9,Q812E4,Q9JI85,Q9QW07,Q9Z2L0                      |
| 5324 | 1,4,6,8,25, 2,3,5,7,26,<br>27,28,30 29,31,32 | 4 P06911,P15399,P20766,Q9QW07                                                                 |
| 5325 | 1,4,6,8,25, 2,3,5,7,26,<br>27,28,31 29,30,32 | 3 P06911,P19629,Q5GRG2                                                                        |
| 5326 | 1,4,6,8,25, 2,3,5,7,26,<br>27,28,32 29,30,31 | 13 P06911,P08723,P0C0A9,P13432,P15399,P19629,P20766,P22282,Q6AYR9,Q812E4,Q9JI85,Q9QW07,Q9QWN8 |
| 5327 | 1,4,6,8,25, 2,3,5,7,26,<br>27,29,30 28,31,32 | 0                                                                                             |
| 5328 | 1,4,6,8,25, 2,3,5,7,26,<br>27,29,31 28,30,32 | 1 P06911                                                                                      |

|      |                                              |                                                                          |
|------|----------------------------------------------|--------------------------------------------------------------------------|
| 5329 | 1,4,6,8,25, 2,3,5,7,26,<br>27,29,32 28,30,31 | 1 P13432                                                                 |
| 5330 | 1,4,6,8,25, 2,3,5,7,26,<br>27,30,31 28,29,32 | 5 P06911,P47967,P54921,Q6AY61,Q9QYP1                                     |
| 5331 | 1,4,6,8,25, 2,3,5,7,26,<br>27,30,32 28,29,31 | 2 P15399,P54921                                                          |
| 5332 | 1,4,6,8,25, 2,3,5,7,26,<br>27,31,32 28,29,30 | 4 P13432,P47967,P54921,Q9QYP1                                            |
| 5333 | 1,4,6,8,25, 2,3,5,7,26,<br>28,29,30 27,31,32 | 3 P06911,P20766,Q9QW07                                                   |
| 5334 | 1,4,6,8,25, 2,3,5,7,26,<br>28,29,31 27,30,32 | 5 P06911,P12020,P70549,Q5GRG2,Q9QW07                                     |
| 5335 | 1,4,6,8,25, 2,3,5,7,26,<br>28,29,32 27,30,31 | 9 P07647,P08723,P0C0A9,P13432,P20766,P30120,Q812E4,Q9JI85,Q9QW07         |
| 5336 | 1,4,6,8,25, 2,3,5,7,26,<br>28,30,31 27,29,32 | 3 P06911,Q6AY61,Q9JJ50                                                   |
| 5337 | 1,4,6,8,25, 2,3,5,7,26,<br>28,30,32 27,29,31 | 3 P20766,Q5PQL7,Q9QW07                                                   |
| 5338 | 1,4,6,8,25, 2,3,5,7,26,<br>28,31,32 27,29,30 | 3 P06911,P13432,P22006                                                   |
| 5339 | 1,4,6,8,25, 2,3,5,7,26,<br>29,30,31 27,28,32 | 2 P47967,Q6AY61                                                          |
| 5340 | 1,4,6,8,25, 2,3,5,7,26,<br>29,30,32 27,28,31 | 3 P13432,P20766,Q5RLM2                                                   |
| 5341 | 1,4,6,8,25, 2,3,5,7,26,<br>29,31,32 27,28,30 | 2 P13432,P47967                                                          |
| 5342 | 1,4,6,8,25, 2,3,5,7,26,<br>30,31,32 27,28,29 | 4 P47967,P54921,Q6AY61,Q9WVK7                                            |
| 5343 | 1,4,6,8,26, 2,3,5,7,25,<br>27,28,29 30,31,32 | 9 P02782,P15399,P22282,P70549,Q6AYR9,Q6P6R2,Q812E4,Q9JI85,Q9QW07         |
| 5344 | 1,4,6,8,26, 2,3,5,7,25,<br>27,28,30 29,31,32 | 4 P15399,P22282,Q6AY61,Q8VD89                                            |
| 5345 | 1,4,6,8,26, 2,3,5,7,25,<br>27,28,31 29,30,32 | 3 P15399,P22282,Q9JI85                                                   |
| 5346 | 1,4,6,8,26, 2,3,5,7,25,<br>27,28,32 29,30,31 | 10 O54728,P08723,P15399,P18418,P22282,Q6AYR9,Q8VD89,Q9JI85,Q9QW07,Q9QWN8 |
| 5347 | 1,4,6,8,26, 2,3,5,7,25,<br>27,29,30 28,31,32 | 3 P15399,Q6AY61,Q811M5                                                   |
| 5348 | 1,4,6,8,26, 2,3,5,7,25,<br>27,29,31 28,30,32 | 3 P15399,P70549,Q63474                                                   |

|      |                                              |                                                                                                                                                |
|------|----------------------------------------------|------------------------------------------------------------------------------------------------------------------------------------------------|
| 5349 | 1,4,6,8,26, 2,3,5,7,25,<br>27,29,32 28,30,31 | 3 P13432,P15399,P22282                                                                                                                         |
| 5350 | 1,4,6,8,26, 2,3,5,7,25,<br>27,30,31 28,29,32 | 3 P15399,P54921,Q6AY61                                                                                                                         |
| 5351 | 1,4,6,8,26, 2,3,5,7,25,<br>27,30,32 28,29,31 | 3 P15399,P54921,Q8VD89                                                                                                                         |
| 5352 | 1,4,6,8,26, 2,3,5,7,25,<br>27,31,32 28,29,30 | 4 O54728,P15399,P22006,P54921                                                                                                                  |
| 5353 | 1,4,6,8,26, 2,3,5,7,25,<br>28,29,30 27,31,32 | 2 P20766,Q9QW07                                                                                                                                |
| 5354 | 1,4,6,8,26, 2,3,5,7,25,<br>28,29,31 27,30,32 | 4 P21674,P70549,Q63474,Q9JI85                                                                                                                  |
| 5355 | 1,4,6,8,26, 2,3,5,7,25,<br>28,29,32 27,30,31 | 7 O54728,P08723,P13432,P20766,P30120,Q9JI85,Q9QW07                                                                                             |
| 5356 | 1,4,6,8,26, 2,3,5,7,25,<br>28,30,31 27,29,32 | 2 Q6AY61,Q8VD89                                                                                                                                |
| 5357 | 1,4,6,8,26, 2,3,5,7,25,<br>28,30,32 27,29,31 | 5 O54728,P20766,Q8VD89,Q9JI85,Q9QW07                                                                                                           |
| 5358 | 1,4,6,8,26, 2,3,5,7,25,<br>28,31,32 27,29,30 | 3 O54728,P22006,Q9JI85                                                                                                                         |
| 5359 | 1,4,6,8,26, 2,3,5,7,25,<br>29,30,31 27,28,32 | 3 Q5RJR2,Q63474,Q6AY61                                                                                                                         |
| 5360 | 1,4,6,8,26, 2,3,5,7,25,<br>29,30,32 27,28,31 | 0                                                                                                                                              |
| 5361 | 1,4,6,8,26, 2,3,5,7,25,<br>29,31,32 27,28,30 | 4 O54728,P13432,P70549,Q63474                                                                                                                  |
| 5362 | 1,4,6,8,26, 2,3,5,7,25,<br>30,31,32 27,28,29 | 6 O54728,P00507,P22006,P54921,Q6AY61,Q8VD89                                                                                                    |
| 5363 | 1,4,6,8,27, 2,3,5,7,25,<br>28,29,30 26,31,32 | 7 P19218,P20766,P22282,Q6AYR9,Q812E4,Q9JI85,Q9QW07                                                                                             |
| 5364 | 1,4,6,8,27, 2,3,5,7,25,<br>28,29,31 26,30,32 | 7 P22282,P36374,Q63474,Q63493,Q6AYR9,Q812E4,Q9JI85                                                                                             |
| 5365 | 1,4,6,8,27, 2,3,5,7,25,<br>28,29,32 26,30,31 | 20 O08815,O35547,P00758,P04905,P07647,P08723,P0C0A9,P20766,P22282,P22283,P30120,P36374,P47727,Q63493,Q6AYR9,Q812E4,Q8CFN2,Q9JI85,Q9QW07,Q9Z2L0 |
| 5366 | 1,4,6,8,27, 2,3,5,7,25,<br>28,30,31 26,29,32 | 2 P19218,Q8VD89                                                                                                                                |
| 5367 | 1,4,6,8,27, 2,3,5,7,25,<br>28,30,32 26,29,31 | 10 B0LT89,P15399,P19218,P20766,P22282,Q6AYR9,Q6P6S4,Q6RUV5,Q8VD89,Q9JI85                                                                       |
| 5368 | 1,4,6,8,27, 2,3,5,7,25,<br>28,31,32 26,29,30 | 9 B0LT89,P08723,P22006,P22282,P36374,Q6AYR9,Q8VD89,Q9JI85,Q9QZK9                                                                               |

|      |                                              |                                             |
|------|----------------------------------------------|---------------------------------------------|
| 5369 | 1,4,6,8,27, 2,3,5,7,25,<br>29,30,31 26,28,32 | 1 Q63474                                    |
| 5370 | 1,4,6,8,27, 2,3,5,7,25,<br>29,30,32 26,28,31 | 2 P00714,P20766                             |
| 5371 | 1,4,6,8,27, 2,3,5,7,25,<br>29,31,32 26,28,30 | 2 P00714,Q63474                             |
| 5372 | 1,4,6,8,27, 2,3,5,7,25,<br>30,31,32 26,28,29 | 3 P22006,P54921,Q8VD89                      |
| 5373 | 1,4,6,8,28, 2,3,5,7,25,<br>29,30,31 26,27,32 | 1 Q63474                                    |
| 5374 | 1,4,6,8,28, 2,3,5,7,25,<br>29,30,32 26,27,31 | 5 P08723,P20766,P30120,Q9JI85,Q9QW07        |
| 5375 | 1,4,6,8,28, 2,3,5,7,25,<br>29,31,32 26,27,30 | 6 P08723,P22006,P30120,Q63474,Q63493,Q9JI85 |
| 5376 | 1,4,6,8,28, 2,3,5,7,25,<br>30,31,32 26,27,29 | 2 P22006,Q8VD89                             |
| 5377 | 1,4,6,8,29, 2,3,5,7,25,<br>30,31,32 26,27,28 | 2 P36860,Q63474                             |
| 5378 | 1,4,6,25,2 2,3,5,7,8,3<br>6,27,28,29 0,31,32 | 3 P20766,P35280,P70549                      |
| 5379 | 1,4,6,25,2 2,3,5,7,8,2<br>6,27,28,30 9,31,32 | 2 P20766,P21588                             |
| 5380 | 1,4,6,25,2 2,3,5,7,8,2<br>6,27,28,31 9,30,32 | 2 P35280,P62804                             |
| 5381 | 1,4,6,25,2 2,3,5,7,8,2<br>6,27,28,32 9,30,31 | 4 P20766,P62804,Q6AYR9,Q9QWN8               |
| 5382 | 1,4,6,25,2 2,3,5,7,8,2<br>6,27,29,30 8,31,32 | 4 P20766,P21588,P36376,Q811M5               |
| 5383 | 1,4,6,25,2 2,3,5,7,8,2<br>6,27,29,31 8,30,32 | 2 P35280,P70549                             |
| 5384 | 1,4,6,25,2 2,3,5,7,8,2<br>6,27,29,32 8,30,31 | 3 P20766,P36376,Q6AYR8                      |
| 5385 | 1,4,6,25,2 2,3,5,7,8,2<br>6,27,30,31 8,29,32 | 4 P47967,P54921,P62804,Q9QYP1               |
| 5386 | 1,4,6,25,2 2,3,5,7,8,2<br>6,27,30,32 8,29,31 | 5 D3ZUC6,P06760,P36376,P54921,P62804        |
| 5387 | 1,4,6,25,2 2,3,5,7,8,2<br>6,27,31,32 8,29,30 | 5 P22006,P47967,P54921,P62804,Q9QYP1        |
| 5388 | 1,4,6,25,2 2,3,5,7,8,2<br>6,28,29,30 7,31,32 | 1 P20766                                    |

|      |                                              |    |                                                                                                          |
|------|----------------------------------------------|----|----------------------------------------------------------------------------------------------------------|
| 5389 | 1,4,6,25,2 2,3,5,7,8,2<br>6,28,29,31 7,30,32 | 2  | P35280,P70549                                                                                            |
| 5390 | 1,4,6,25,2 2,3,5,7,8,2<br>6,28,29,32 7,30,31 | 3  | P00731,P20766,Q6AYR8                                                                                     |
| 5391 | 1,4,6,25,2 2,3,5,7,8,2<br>6,28,30,31 7,29,32 | 1  | P25809                                                                                                   |
| 5392 | 1,4,6,25,2 2,3,5,7,8,2<br>6,28,30,32 7,29,31 | 7  | P00731,P06760,P20766,P25809,P62804,Q5PQL7,Q62975                                                         |
| 5393 | 1,4,6,25,2 2,3,5,7,8,2<br>6,28,31,32 7,29,30 | 5  | O54728,P00731,P22006,P25809,P62804                                                                       |
| 5394 | 1,4,6,25,2 2,3,5,7,8,2<br>6,29,30,31 7,28,32 | 2  | P25809,P47967                                                                                            |
| 5395 | 1,4,6,25,2 2,3,5,7,8,2<br>6,29,30,32 7,28,31 | 5  | D3ZUC6,P00507,P20766,P36376,Q6AYR8                                                                       |
| 5396 | 1,4,6,25,2 2,3,5,7,8,2<br>6,29,31,32 7,28,30 | 7  | P00507,P00731,P19218,P47967,P62804,P70549,Q6AYR8                                                         |
| 5397 | 1,4,6,25,2 2,3,5,7,8,2<br>6,30,31,32 7,28,29 | 12 | D3ZUC6,P00507,P06760,P22006,P25809,P47967,P54921,P62804,Q00715,Q4G075,Q9QYP1,Q9WVK7                      |
| 5398 | 1,4,6,25,2 2,3,5,7,8,2<br>7,28,29,30 6,31,32 | 1  | P20766                                                                                                   |
| 5399 | 1,4,6,25,2 2,3,5,7,8,2<br>7,28,29,31 6,30,32 | 2  | P35280,P36374                                                                                            |
| 5400 | 1,4,6,25,2 2,3,5,7,8,2<br>7,28,29,32 6,30,31 | 13 | O08815,O35547,P00758,P07647,P0C0A9,P20766,P36374,Q62761;Q62762;Q62763,Q6AYR8,Q6AYR9,Q812E4,Q8CGS4,Q9Z2L0 |
| 5401 | 1,4,6,25,2 2,3,5,7,8,2<br>7,28,30,31 6,29,32 | 1  | Q9QYP1                                                                                                   |
| 5402 | 1,4,6,25,2 2,3,5,7,8,2<br>7,28,30,32 6,29,31 | 4  | P06760,P20766,Q8VD89,Q9QX74                                                                              |
| 5403 | 1,4,6,25,2 2,3,5,7,8,2<br>7,28,31,32 6,29,30 | 5  | P22006,P36374,P62804,Q9QYP1,Q9WUW8                                                                       |
| 5404 | 1,4,6,25,2 2,3,5,7,8,2<br>7,29,30,31 6,28,32 | 1  | Q9QYP1                                                                                                   |
| 5405 | 1,4,6,25,2 2,3,5,7,8,2<br>7,29,30,32 6,28,31 | 3  | P20766,P36376,Q5RLM2                                                                                     |
| 5406 | 1,4,6,25,2 2,3,5,7,8,2<br>7,29,31,32 6,28,30 | 2  | P62804,Q9QYP1                                                                                            |
| 5407 | 1,4,6,25,2 2,3,5,7,8,2<br>7,30,31,32 6,28,29 | 10 | D3ZUC6,P06760,P22006,P47967,P54921,P62804,Q6P6R2,Q9QX74,Q9QYP1,Q9WTT6                                    |
| 5408 | 1,4,6,25,2 2,3,5,7,8,2<br>8,29,30,31 6,27,32 | 2  | P25809,Q9JJ50                                                                                            |

|      |                                              |                                                                                 |
|------|----------------------------------------------|---------------------------------------------------------------------------------|
| 5409 | 1,4,6,25,2 2,3,5,7,8,2<br>8,29,30,32 6,27,31 | 1 P20766                                                                        |
| 5410 | 1,4,6,25,2 2,3,5,7,8,2<br>8,29,31,32 6,27,30 | 2 P00731,Q6AYR8                                                                 |
| 5411 | 1,4,6,25,2 2,3,5,7,8,2<br>8,30,31,32 6,27,29 | 11 P06760,P22006,P25809,P47967,P62804,Q00715,Q4G075,Q62975,Q9JJ50,Q9QX74,Q9WTT6 |
| 5412 | 1,4,6,25,2 2,3,5,7,8,2<br>9,30,31,32 6,27,28 | 6 D3ZUC6,P25809,P36860,P47967,Q5RLM2,Q9WTT6                                     |
| 5413 | 1,4,6,26,2 2,3,5,7,8,2<br>7,28,29,30 5,31,32 | 3 P20766,P21588,Q811M5                                                          |
| 5414 | 1,4,6,26,2 2,3,5,7,8,2<br>7,28,29,31 5,30,32 | 4 P35280,P36374,P70549,Q63474                                                   |
| 5415 | 1,4,6,26,2 2,3,5,7,8,2<br>7,28,29,32 5,30,31 | 7 O35547,P00758,P20766,P36374,P36376,Q6AYR9,Q8CGS4                              |
| 5416 | 1,4,6,26,2 2,3,5,7,8,2<br>7,28,30,31 5,29,32 | 1 Q8VD89                                                                        |
| 5417 | 1,4,6,26,2 2,3,5,7,8,2<br>7,28,30,32 5,29,31 | 2 P20766,Q8VD89                                                                 |
| 5418 | 1,4,6,26,2 2,3,5,7,8,2<br>7,28,31,32 5,29,30 | 5 O54728,P22006,P36374,P62804,Q8VD89                                            |
| 5419 | 1,4,6,26,2 2,3,5,7,8,2<br>7,29,30,31 5,28,32 | 2 P36860,Q811M5                                                                 |
| 5420 | 1,4,6,26,2 2,3,5,7,8,2<br>7,29,30,32 5,28,31 | 3 P20766,P36376,Q811M5                                                          |
| 5421 | 1,4,6,26,2 2,3,5,7,8,2<br>7,29,31,32 5,28,30 | 3 P22006,P62804,Q63474                                                          |
| 5422 | 1,4,6,26,2 2,3,5,7,8,2<br>7,30,31,32 5,28,29 | 7 P06760,P22006,P36860,P54921,P62804,Q8VD89,Q9QYP1                              |
| 5423 | 1,4,6,26,2 2,3,5,7,8,2<br>8,29,30,31 5,27,32 | 1 Q63474                                                                        |
| 5424 | 1,4,6,26,2 2,3,5,7,8,2<br>8,29,30,32 5,27,31 | 3 P20766,P36376,P50115                                                          |
| 5425 | 1,4,6,26,2 2,3,5,7,8,2<br>8,29,31,32 5,27,30 | 5 O54728,P00731,P22006,P70549,Q63474                                            |
| 5426 | 1,4,6,26,2 2,3,5,7,8,2<br>8,30,31,32 5,27,29 | 9 O54728,P06760,P22006,P25809,P50115,P62804,Q00715,Q4G075,Q8VD89                |
| 5427 | 1,4,6,26,2 2,3,5,7,8,2<br>9,30,31,32 5,27,28 | 5 P22006,P36860,P50115,P62804,Q63474                                            |
| 5428 | 1,4,6,27,2 2,3,5,7,8,2<br>8,29,30,31 5,26,32 | 1 Q63474                                                                        |

|      |                                              |                                                                                 |
|------|----------------------------------------------|---------------------------------------------------------------------------------|
| 5429 | 1,4,6,27,2 2,3,5,7,8,2<br>8,29,30,32 5,26,31 | 4 O35547,P00758,P20766,Q6AYR9                                                   |
| 5430 | 1,4,6,27,2 2,3,5,7,8,2<br>8,29,31,32 5,26,30 | 7 O08815,O35547,P22006,P36374,P80299,Q63474,Q6AYR9                              |
| 5431 | 1,4,6,27,2 2,3,5,7,8,2<br>8,30,31,32 5,26,29 | 5 P06760,P22006,P62804,Q8VD89,Q9QX74                                            |
| 5432 | 1,4,6,27,2 2,3,5,7,8,2<br>9,30,31,32 5,26,28 | 5 P00714,P22006,P36860,P80299,Q9WTT6                                            |
| 5433 | 1,4,6,28,2 2,3,5,7,8,2<br>9,30,31,32 5,26,27 | 5 P22006,P36860,P50115,Q63474,Q9WTT6                                            |
| 5434 | 1,4,7,8,25, 2,3,5,6,29,<br>26,27,28 30,31,32 | 11 P02782,P07150,P0C0A9,P20646,P22282,P26342,P36860,Q4G075,Q9QW07,Q9WTT6,Q9Z1F2 |
| 5435 | 1,4,7,8,25, 2,3,5,6,28,<br>26,27,29 30,31,32 | 4 P20646,Q4G075,Q9QX74,Q9WTT6                                                   |
| 5436 | 1,4,7,8,25, 2,3,5,6,28,<br>26,27,30 29,31,32 | 1 Q9Z1F2                                                                        |
| 5437 | 1,4,7,8,25, 2,3,5,6,28,<br>26,27,31 29,30,32 | 4 Q5I0J9,Q9QYP1,Q9Z0V6,Q9Z1F2                                                   |
| 5438 | 1,4,7,8,25, 2,3,5,6,28,<br>26,27,32 29,30,31 | 2 P13432,Q9JHB9                                                                 |
| 5439 | 1,4,7,8,25, 2,3,5,6,27,<br>26,28,29 30,31,32 | 8 P01039,P20646,Q5I0J9,Q6P6R2,Q9QW07,Q9QX74,Q9WTT6,Q9Z2L0                       |
| 5440 | 1,4,7,8,25, 2,3,5,6,27,<br>26,28,30 29,31,32 | 1 Q9Z1F2                                                                        |
| 5441 | 1,4,7,8,25, 2,3,5,6,27,<br>26,28,31 29,30,32 | 4 Q5I0J9,Q63598,Q9Z0V6,Q9Z1F2                                                   |
| 5442 | 1,4,7,8,25, 2,3,5,6,27,<br>26,28,32 29,30,31 | 5 O54728,P01039,P08723,Q9QW07,Q9Z1F2                                            |
| 5443 | 1,4,7,8,25, 2,3,5,6,27,<br>26,29,30 28,31,32 | 1 Q9QX74                                                                        |
| 5444 | 1,4,7,8,25, 2,3,5,6,27,<br>26,29,31 28,30,32 | 3 P70549,Q5I0J9,Q9QX74                                                          |
| 5445 | 1,4,7,8,25, 2,3,5,6,27,<br>26,29,32 28,30,31 | 1 P13432                                                                        |
| 5446 | 1,4,7,8,25, 2,3,5,6,27,<br>26,30,31 28,29,32 | 3 Q6AY61,Q9WVK7,Q9Z1F2                                                          |
| 5447 | 1,4,7,8,25, 2,3,5,6,27,<br>26,30,32 28,29,31 | 1 Q9WVK7                                                                        |
| 5448 | 1,4,7,8,25, 2,3,5,6,27,<br>26,31,32 28,29,30 | 4 O54728,P13432,Q5I0J9,Q9WVK7                                                   |

|      |                                              |    |                                                                                                              |
|------|----------------------------------------------|----|--------------------------------------------------------------------------------------------------------------|
| 5449 | 1,4,7,8,25, 2,3,5,6,26,<br>27,28,29 30,31,32 | 15 | P0C0A9,P10758,P20646,P22282,P22283,P47727,Q4G075,Q63493,Q63617,Q6AYR9,Q812E4,Q9<br>9MH3,Q9QW07,Q9WTT6,Q9Z2L0 |
| 5450 | 1,4,7,8,25, 2,3,5,6,26,<br>27,28,30 29,31,32 | 3  | P22282,Q4G075,Q9Z1F2                                                                                         |
| 5451 | 1,4,7,8,25, 2,3,5,6,26,<br>27,28,31 29,30,32 | 5  | P06911,P0C0A9,P22282,P82471,Q99MH3                                                                           |
| 5452 | 1,4,7,8,25, 2,3,5,6,26,<br>27,28,32 29,30,31 | 10 | P02781,P04905,P08723,P0C0A9,P22282,Q6AYR9,Q812E4,Q9JHB9,Q9QW07,Q9Z2L0                                        |
| 5453 | 1,4,7,8,25, 2,3,5,6,26,<br>27,29,30 28,31,32 | 3  | Q4G075,Q6P6Q2,Q99MH3                                                                                         |
| 5454 | 1,4,7,8,25, 2,3,5,6,26,<br>27,29,31 28,30,32 | 4  | P10758,P82471,Q4G075,Q99MH3                                                                                  |
| 5455 | 1,4,7,8,25, 2,3,5,6,26,<br>27,29,32 28,30,31 | 5  | P0C0A9,P22282,Q4G075,Q99MH3,Q9Z2L0                                                                           |
| 5456 | 1,4,7,8,25, 2,3,5,6,26,<br>27,30,31 28,29,32 | 1  | Q9QYP1                                                                                                       |
| 5457 | 1,4,7,8,25, 2,3,5,6,26,<br>27,30,32 28,29,31 | 1  | Q9JHB9                                                                                                       |
| 5458 | 1,4,7,8,25, 2,3,5,6,26,<br>27,31,32 28,29,30 | 3  | P01681,P82471,Q9QYP1                                                                                         |
| 5459 | 1,4,7,8,25, 2,3,5,6,26,<br>28,29,30 27,31,32 | 3  | P01039,Q9QW07,Q9Z2L0                                                                                         |
| 5460 | 1,4,7,8,25, 2,3,5,6,26,<br>28,29,31 27,30,32 | 6  | P01039,P82471,Q5I0J9,Q63493,Q99MH3,Q9JJ50                                                                    |
| 5461 | 1,4,7,8,25, 2,3,5,6,26,<br>28,29,32 27,30,31 | 11 | P01039,P08723,P0C0A9,P24368,P30120,P47727,Q63493,Q812E4,Q99MH3,Q9QW07,Q9Z2L0                                 |
| 5462 | 1,4,7,8,25, 2,3,5,6,26,<br>28,30,31 27,29,32 | 3  | P82471,Q9JJ50,Q9Z1F2                                                                                         |
| 5463 | 1,4,7,8,25, 2,3,5,6,26,<br>28,30,32 27,29,31 | 1  | P08723                                                                                                       |
| 5464 | 1,4,7,8,25, 2,3,5,6,26,<br>28,31,32 27,29,30 | 5  | P08723,P21588,P82471,Q811M5,Q9JJ50                                                                           |
| 5465 | 1,4,7,8,25, 2,3,5,6,26,<br>29,30,31 27,28,32 | 1  | P82471                                                                                                       |
| 5466 | 1,4,7,8,25, 2,3,5,6,26,<br>29,30,32 27,28,31 | 0  |                                                                                                              |
| 5467 | 1,4,7,8,25, 2,3,5,6,26,<br>29,31,32 27,28,30 | 2  | P21588,P82471                                                                                                |
| 5468 | 1,4,7,8,25, 2,3,5,6,26,<br>30,31,32 27,28,29 | 3  | P82471,Q9QYP1,Q9WVK7                                                                                         |



|      |                                              |    |                                                                                                                 |
|------|----------------------------------------------|----|-----------------------------------------------------------------------------------------------------------------|
| 5469 | 1,4,7,8,26, 2,3,5,6,25,<br>27,28,29 30,31,32 | 16 | P02782,P07150,P20646,P22273,P22282,P22283,P47727,Q4G075,Q63617,Q6AYR9,Q6P6R2,Q812E4,Q9QW07,Q9QX74,Q9WTT6,Q9Z2L0 |
| 5470 | 1,4,7,8,26, 2,3,5,6,25,<br>27,28,30 29,31,32 | 4  | P07150,P22282,Q9WTT6,Q9Z1F2                                                                                     |
| 5471 | 1,4,7,8,26, 2,3,5,6,25,<br>27,28,31 29,30,32 | 6  | P02782,P07150,P22282,P97523,Q9WTT6,Q9Z1F2                                                                       |
| 5472 | 1,4,7,8,26, 2,3,5,6,25,<br>27,28,32 29,30,31 | 10 | O54728,P02782,P07150,P08723,P22282,Q6AYR9,Q812E4,Q9QWN8,Q9WTT6,Q9Z1F2                                           |
| 5473 | 1,4,7,8,26, 2,3,5,6,25,<br>27,29,30 28,31,32 | 2  | Q4G075,Q9QX74                                                                                                   |
| 5474 | 1,4,7,8,26, 2,3,5,6,25,<br>27,29,31 28,30,32 | 3  | Q4G075,Q9QX74,Q9WTT6                                                                                            |
| 5475 | 1,4,7,8,26, 2,3,5,6,25,<br>27,29,32 28,30,31 | 3  | P22282,Q4G075,Q9QX74                                                                                            |
| 5476 | 1,4,7,8,26, 2,3,5,6,25,<br>27,30,31 28,29,32 | 2  | Q6AY61,Q9Z1F2                                                                                                   |
| 5477 | 1,4,7,8,26, 2,3,5,6,25,<br>27,30,32 28,29,31 | 0  |                                                                                                                 |
| 5478 | 1,4,7,8,26, 2,3,5,6,25,<br>27,31,32 28,29,30 | 2  | O54728,P82471                                                                                                   |
| 5479 | 1,4,7,8,26, 2,3,5,6,25,<br>28,29,30 27,31,32 | 5  | P01039,P20646,P21674,Q6P6R2,Q9QX74                                                                              |
| 5480 | 1,4,7,8,26, 2,3,5,6,25,<br>28,29,31 27,30,32 | 9  | P01039,P20646,P21674,P70549,P82471,Q63474,Q6P6R2,Q9QX74,Q9WTT6                                                  |
| 5481 | 1,4,7,8,26, 2,3,5,6,25,<br>28,29,32 27,30,31 | 10 | O54728,P01039,P08723,P21674,P24368,P30120,Q63493,Q812E4,Q9QW07,Q9Z2L0                                           |
| 5482 | 1,4,7,8,26, 2,3,5,6,25,<br>28,30,31 27,29,32 | 2  | P82471,Q9Z1F2                                                                                                   |
| 5483 | 1,4,7,8,26, 2,3,5,6,25,<br>28,30,32 27,29,31 | 2  | O54728,Q9Z1F2                                                                                                   |
| 5484 | 1,4,7,8,26, 2,3,5,6,25,<br>28,31,32 27,29,30 | 4  | O54728,P08723,P82471,Q9Z1F2                                                                                     |
| 5485 | 1,4,7,8,26, 2,3,5,6,25,<br>29,30,31 27,28,32 | 4  | P49134,P82471,Q63474,Q9QX74                                                                                     |
| 5486 | 1,4,7,8,26, 2,3,5,6,25,<br>29,30,32 27,28,31 | 0  |                                                                                                                 |
| 5487 | 1,4,7,8,26, 2,3,5,6,25,<br>29,31,32 27,28,30 | 4  | O54728,P82471,Q63474,Q9QX74                                                                                     |
| 5488 | 1,4,7,8,26, 2,3,5,6,25,<br>30,31,32 27,28,29 | 2  | O54728,P82471                                                                                                   |

|      |                                              |    |                                                                                                                                                                  |
|------|----------------------------------------------|----|------------------------------------------------------------------------------------------------------------------------------------------------------------------|
| 5489 | 1,4,7,8,27, 2,3,5,6,25,<br>28,29,30 26,31,32 | 8  | P22282,P47727,Q4G075,Q63617,Q6AYR9,Q812E4,Q99MH3,Q9Z2L0                                                                                                          |
| 5490 | 1,4,7,8,27, 2,3,5,6,25,<br>28,29,31 26,30,32 | 13 | P22282,P22283,P36374,P47727,P82471,P97523,Q4G075,Q63493,Q63617,Q6AYR9,Q812E4,Q99MH3,Q9Z2L0                                                                       |
| 5491 | 1,4,7,8,27, 2,3,5,6,25,<br>28,29,32 26,30,31 | 23 | O08815,O35547,P00758,P02780,P02781,P04905,P08723,P0C0A9,P18298,P22282,P22283,P24368,P30120,P36374,P47727,Q4G075,Q63493,Q63617,Q6AYR9,Q812E4,Q99MH3,Q9QW07,Q9Z2L0 |
| 5492 | 1,4,7,8,27, 2,3,5,6,25,<br>28,30,31 26,29,32 | 2  | P82471,Q9Z1F2                                                                                                                                                    |
| 5493 | 1,4,7,8,27, 2,3,5,6,25,<br>28,30,32 26,29,31 | 7  | P08723,P18298,P22282,Q6AYR9,Q812E4,Q8VD89,Q9Z2L0                                                                                                                 |
| 5494 | 1,4,7,8,27, 2,3,5,6,25,<br>28,31,32 26,29,30 | 6  | P08723,P22282,P36374,P82471,Q6AYR9,Q812E4                                                                                                                        |
| 5495 | 1,4,7,8,27, 2,3,5,6,25,<br>29,30,31 26,28,32 | 2  | P82471,Q4G075                                                                                                                                                    |
| 5496 | 1,4,7,8,27, 2,3,5,6,25,<br>29,30,32 26,28,31 | 2  | P00714,Q4G075                                                                                                                                                    |
| 5497 | 1,4,7,8,27, 2,3,5,6,25,<br>29,31,32 26,28,30 | 4  | P00714,P80299,P82471,Q99MH3                                                                                                                                      |
| 5498 | 1,4,7,8,27, 2,3,5,6,25,<br>30,31,32 26,28,29 | 2  | P82471,Q9QYP1                                                                                                                                                    |
| 5499 | 1,4,7,8,28, 2,3,5,6,25,<br>29,30,31 26,27,32 | 5  | P01039,P21674,P82471,Q63474,Q9JJ50                                                                                                                               |
| 5500 | 1,4,7,8,28, 2,3,5,6,25,<br>29,30,32 26,27,31 | 6  | P01039,P02780,P08723,P30120,Q812E4,Q9Z2L0                                                                                                                        |
| 5501 | 1,4,7,8,28, 2,3,5,6,25,<br>29,31,32 26,27,30 | 8  | P01039,P08723,P21674,P30120,P82471,Q63474,Q63493,Q812E4                                                                                                          |
| 5502 | 1,4,7,8,28, 2,3,5,6,25,<br>30,31,32 26,27,29 | 2  | P82471,Q9JJ50                                                                                                                                                    |
| 5503 | 1,4,7,8,29, 2,3,5,6,25,<br>30,31,32 26,27,28 | 3  | B0BNN3,P82471,Q63474                                                                                                                                             |
| 5504 | 1,4,7,25,2 2,3,5,6,8,3<br>6,27,28,29 0,31,32 | 7  | O89117,P10758,P20646,Q6P6R2,Q8CGS4,Q99MH3,Q9Z2L0                                                                                                                 |
| 5505 | 1,4,7,25,2 2,3,5,6,8,2<br>6,27,28,30 9,31,32 | 2  | P20646,Q9Z1F2                                                                                                                                                    |
| 5506 | 1,4,7,25,2 2,3,5,6,8,2<br>6,27,28,31 9,30,32 | 4  | O88797,P20646,Q5I0J9,Q9QYP1                                                                                                                                      |
| 5507 | 1,4,7,25,2 2,3,5,6,8,2<br>6,27,28,32 9,30,31 | 4  | P0C0A9,Q5RJR2,Q62761;Q62762;Q62763,Q6AYR9                                                                                                                        |
| 5508 | 1,4,7,25,2 2,3,5,6,8,2<br>6,27,29,30 8,31,32 | 1  | P36376                                                                                                                                                           |

|      |                                              |                                                                                                                                  |
|------|----------------------------------------------|----------------------------------------------------------------------------------------------------------------------------------|
| 5509 | 1,4,7,25,2 2,3,5,6,8,2<br>6,27,29,31 8,30,32 | 3 P10758,Q5I0J9,Q9QYP1                                                                                                           |
| 5510 | 1,4,7,25,2 2,3,5,6,8,2<br>6,27,29,32 8,30,31 | 3 P10758,P36376,Q6AYR8                                                                                                           |
| 5511 | 1,4,7,25,2 2,3,5,6,8,2<br>6,27,30,31 8,29,32 | 1 Q9QYP1                                                                                                                         |
| 5512 | 1,4,7,25,2 2,3,5,6,8,2<br>6,27,30,32 8,29,31 | 2 P36376,Q9R168                                                                                                                  |
| 5513 | 1,4,7,25,2 2,3,5,6,8,2<br>6,27,31,32 8,29,30 | 1 Q9QYP1                                                                                                                         |
| 5514 | 1,4,7,25,2 2,3,5,6,8,2<br>6,28,29,30 7,31,32 | 3 P01039,P20646,P36376                                                                                                           |
| 5515 | 1,4,7,25,2 2,3,5,6,8,2<br>6,28,29,31 7,30,32 | 3 P20646,P70549,Q5I0J9                                                                                                           |
| 5516 | 1,4,7,25,2 2,3,5,6,8,2<br>6,28,29,32 7,30,31 | 5 P00731,P01039,P20646,P36376,Q6AYR8                                                                                             |
| 5517 | 1,4,7,25,2 2,3,5,6,8,2<br>6,28,30,31 7,29,32 | 2 Q9JJ50,Q9Z1F2                                                                                                                  |
| 5518 | 1,4,7,25,2 2,3,5,6,8,2<br>6,28,30,32 7,29,31 | 4 P00731,P36376,Q62975,Q9R168                                                                                                    |
| 5519 | 1,4,7,25,2 2,3,5,6,8,2<br>6,28,31,32 7,29,30 | 4 O54728,P00731,Q5I0J9,Q6IFU7                                                                                                    |
| 5520 | 1,4,7,25,2 2,3,5,6,8,2<br>6,29,30,31 7,28,32 | 0                                                                                                                                |
| 5521 | 1,4,7,25,2 2,3,5,6,8,2<br>6,29,30,32 7,28,31 | 2 P36376,Q9R168                                                                                                                  |
| 5522 | 1,4,7,25,2 2,3,5,6,8,2<br>6,29,31,32 7,28,30 | 3 P19218,Q5I0J9,Q6AYR8                                                                                                           |
| 5523 | 1,4,7,25,2 2,3,5,6,8,2<br>6,30,31,32 7,28,29 | 4 P25809,Q00715,Q9QYP1,Q9WVK7                                                                                                    |
| 5524 | 1,4,7,25,2 2,3,5,6,8,2<br>7,28,29,30 6,31,32 | 2 Q99MH3,Q9Z2L0                                                                                                                  |
| 5525 | 1,4,7,25,2 2,3,5,6,8,2<br>7,28,29,31 6,30,32 | 3 P10758,P36374,Q99MH3                                                                                                           |
| 5526 | 1,4,7,25,2 2,3,5,6,8,2<br>7,28,29,32 6,30,31 | 16 O08815,O35547,P00758,P08723,P0C0A9,P10758,P22283,P36374,Q5RJR2,Q62761;Q62762;Q62763,Q6AYR8,Q6AYR9,Q812E4,Q8CGS4,Q99MH3,Q9Z2L0 |
| 5527 | 1,4,7,25,2 2,3,5,6,8,2<br>7,28,30,31 6,29,32 | 2 Q99MH3,Q9QYP1                                                                                                                  |
| 5528 | 1,4,7,25,2 2,3,5,6,8,2<br>7,28,30,32 6,29,31 | 1 Q9R168                                                                                                                         |

|      |                                              |                                                                                                      |
|------|----------------------------------------------|------------------------------------------------------------------------------------------------------|
| 5529 | 1,4,7,25,2 2,3,5,6,8,2<br>7,28,31,32 6,29,30 | 4 P36374,Q62761;Q62762;Q62763,Q99MH3,Q9QYP1                                                          |
| 5530 | 1,4,7,25,2 2,3,5,6,8,2<br>7,29,30,31 6,28,32 | 2 Q99MH3,Q9QYP1                                                                                      |
| 5531 | 1,4,7,25,2 2,3,5,6,8,2<br>7,29,30,32 6,28,31 | 3 P36376,Q99MH3,Q9R168                                                                               |
| 5532 | 1,4,7,25,2 2,3,5,6,8,2<br>7,29,31,32 6,28,30 | 4 P10758,P80299,Q99MH3,Q9QYP1                                                                        |
| 5533 | 1,4,7,25,2 2,3,5,6,8,2<br>7,30,31,32 6,28,29 | 1 Q9QYP1                                                                                             |
| 5534 | 1,4,7,25,2 2,3,5,6,8,2<br>8,29,30,31 6,27,32 | 2 Q99MH3,Q9JJ50                                                                                      |
| 5535 | 1,4,7,25,2 2,3,5,6,8,2<br>8,29,30,32 6,27,31 | 4 P36376,Q62975,Q99MH3,Q9R168                                                                        |
| 5536 | 1,4,7,25,2 2,3,5,6,8,2<br>8,29,31,32 6,27,30 | 2 Q99MH3,Q9JJ50                                                                                      |
| 5537 | 1,4,7,25,2 2,3,5,6,8,2<br>8,30,31,32 6,27,29 | 4 P25809,Q62975,Q9JJ50,Q9QYP1                                                                        |
| 5538 | 1,4,7,25,2 2,3,5,6,8,2<br>9,30,31,32 6,27,28 | 3 P25809,Q9QYP1,Q9WVK7                                                                               |
| 5539 | 1,4,7,26,2 2,3,5,6,8,2<br>7,28,29,30 5,31,32 | 2 P20646,P36376                                                                                      |
| 5540 | 1,4,7,26,2 2,3,5,6,8,2<br>7,28,29,31 5,30,32 | 4 O88797,P10758,P20646,P36374                                                                        |
| 5541 | 1,4,7,26,2 2,3,5,6,8,2<br>7,28,29,32 5,30,31 | 12 O35547,P00758,P10758,P20646,P22283,P36374,P36376,Q62761;Q62762;Q62763,Q6AYR9,Q812E4,Q8CGS4,Q9Z2L0 |
| 5542 | 1,4,7,26,2 2,3,5,6,8,2<br>7,28,30,31 5,29,32 | 1 Q9Z1F2                                                                                             |
| 5543 | 1,4,7,26,2 2,3,5,6,8,2<br>7,28,30,32 5,29,31 | 3 P36376,Q8VD89,Q9R168                                                                               |
| 5544 | 1,4,7,26,2 2,3,5,6,8,2<br>7,28,31,32 5,29,30 | 4 O54728,O88797,P22006,P36374                                                                        |
| 5545 | 1,4,7,26,2 2,3,5,6,8,2<br>7,29,30,31 5,28,32 | 1 P36376                                                                                             |
| 5546 | 1,4,7,26,2 2,3,5,6,8,2<br>7,29,30,32 5,28,31 | 1 P36376                                                                                             |
| 5547 | 1,4,7,26,2 2,3,5,6,8,2<br>7,29,31,32 5,28,30 | 3 P10758,P36376,P80299                                                                               |
| 5548 | 1,4,7,26,2 2,3,5,6,8,2<br>7,30,31,32 5,28,29 | 2 P36376,Q9QYP1                                                                                      |

|      |                                              |                                                                                        |
|------|----------------------------------------------|----------------------------------------------------------------------------------------|
| 5549 | 1,4,7,26,2 2,3,5,6,8,2<br>8,29,30,31 5,27,32 | 1 Q63474                                                                               |
| 5550 | 1,4,7,26,2 2,3,5,6,8,2<br>8,29,30,32 5,27,31 | 2 P36376,Q9R168                                                                        |
| 5551 | 1,4,7,26,2 2,3,5,6,8,2<br>8,29,31,32 5,27,30 | 3 O54728,Q63474,Q6IFU7                                                                 |
| 5552 | 1,4,7,26,2 2,3,5,6,8,2<br>8,30,31,32 5,27,29 | 2 O54728,P22006                                                                        |
| 5553 | 1,4,7,26,2 2,3,5,6,8,2<br>9,30,31,32 5,27,28 | 3 P36376,P36860,Q63474                                                                 |
| 5554 | 1,4,7,27,2 2,3,5,6,8,2<br>8,29,30,31 5,26,32 | 1 Q99MH3                                                                               |
| 5555 | 1,4,7,27,2 2,3,5,6,8,2<br>8,29,30,32 5,26,31 | 8 O35547,P00758,P36376,Q62761;Q62762;Q62763,Q6AYR9,Q812E4,Q99MH3,Q9Z2L0                |
| 5556 | 1,4,7,27,2 2,3,5,6,8,2<br>8,29,31,32 5,26,30 | 10 O08815,O35547,P10758,P36374,P80299,Q62761;Q62762;Q62763,Q6AYR9,Q812E4,Q8CGS4,Q99MH3 |
| 5557 | 1,4,7,27,2 2,3,5,6,8,2<br>8,30,31,32 5,26,29 | 4 P22006,P80299,Q8VD89,Q9QYP1                                                          |
| 5558 | 1,4,7,27,2 2,3,5,6,8,2<br>9,30,31,32 5,26,28 | 6 B0BNN3,P00714,P08649,P80299,Q99MH3,Q9QYP1                                            |
| 5559 | 1,4,7,28,2 2,3,5,6,8,2<br>9,30,31,32 5,26,27 | 4 P17559,Q5BJY9,Q63474,Q9JJ50                                                          |
| 5560 | 1,4,8,25,2 2,3,5,6,7,3<br>6,27,28,29 0,31,32 | 8 P20646,P20766,P26342,P47727,Q6AYR9,Q6P6R2,Q812E4,Q9Z2L0                              |
| 5561 | 1,4,8,25,2 2,3,5,6,7,2<br>6,27,28,30 9,31,32 | 1 P20766                                                                               |
| 5562 | 1,4,8,25,2 2,3,5,6,7,2<br>6,27,28,31 9,30,32 | 2 P01835,P26342                                                                        |
| 5563 | 1,4,8,25,2 2,3,5,6,7,2<br>6,27,28,32 9,30,31 | 5 O54728,P20766,P36374,Q6AYR9,Q9QWN8                                                   |
| 5564 | 1,4,8,25,2 2,3,5,6,7,2<br>6,27,29,30 8,31,32 | 1 P20766                                                                               |
| 5565 | 1,4,8,25,2 2,3,5,6,7,2<br>6,27,29,31 8,30,32 | 0                                                                                      |
| 5566 | 1,4,8,25,2 2,3,5,6,7,2<br>6,27,29,32 8,30,31 | 1 P13432                                                                               |
| 5567 | 1,4,8,25,2 2,3,5,6,7,2<br>6,27,30,31 8,29,32 | 4 P47967,P54921,Q6AY61,Q9QYP1                                                          |
| 5568 | 1,4,8,25,2 2,3,5,6,7,2<br>6,27,30,32 8,29,31 | 2 P00762,P54921                                                                        |

|      |                                              |    |                                                                                                   |
|------|----------------------------------------------|----|---------------------------------------------------------------------------------------------------|
| 5569 | 1,4,8,25,2 2,3,5,6,7,2<br>6,27,31,32 8,29,30 | 5  | O54728,P00762,P47967,P54921,Q9QYP1                                                                |
| 5570 | 1,4,8,25,2 2,3,5,6,7,2<br>6,28,29,30 7,31,32 | 4  | P01039,P20766,P50116,Q62714                                                                       |
| 5571 | 1,4,8,25,2 2,3,5,6,7,2<br>6,28,29,31 7,30,32 | 4  | P01039,P50116,P70549,Q5I0J9                                                                       |
| 5572 | 1,4,8,25,2 2,3,5,6,7,2<br>6,28,29,32 7,30,31 | 7  | O54728,P01039,P08723,P13432,P20766,P30120,P50116                                                  |
| 5573 | 1,4,8,25,2 2,3,5,6,7,2<br>6,28,30,31 7,29,32 | 5  | O08839,P50116,Q07523,Q6AY61,Q9JJ50                                                                |
| 5574 | 1,4,8,25,2 2,3,5,6,7,2<br>6,28,30,32 7,29,31 | 4  | O54728,P01039,P20766,P50116                                                                       |
| 5575 | 1,4,8,25,2 2,3,5,6,7,2<br>6,28,31,32 7,29,30 | 3  | O54728,P01039,P50116                                                                              |
| 5576 | 1,4,8,25,2 2,3,5,6,7,2<br>6,29,30,31 7,28,32 | 3  | P47967,P50116,Q6AY61                                                                              |
| 5577 | 1,4,8,25,2 2,3,5,6,7,2<br>6,29,30,32 7,28,31 | 4  | P00507,P01039,P20766,P50116                                                                       |
| 5578 | 1,4,8,25,2 2,3,5,6,7,2<br>6,29,31,32 7,28,30 | 7  | O54728,P00507,P01039,P13432,P19218,P47967,P50116                                                  |
| 5579 | 1,4,8,25,2 2,3,5,6,7,2<br>6,30,31,32 7,28,29 | 8  | O54728,P00507,P47967,P50116,P54921,Q00715,Q6AY61,Q9WVK7                                           |
| 5580 | 1,4,8,25,2 2,3,5,6,7,2<br>7,28,29,30 6,31,32 | 6  | P20766,Q62714,Q6AYR9,Q812E4,Q99MH3,Q9Z2L0                                                         |
| 5581 | 1,4,8,25,2 2,3,5,6,7,2<br>7,28,29,31 6,30,32 | 4  | D3ZTX0,P36374,Q812E4,Q99MH3                                                                       |
| 5582 | 1,4,8,25,2 2,3,5,6,7,2<br>7,28,29,32 6,30,31 | 14 | O08815,O35547,P00758,P04905,P08723,P0C0A9,P20766,P30120,P36374,P47727,Q6AYR9,Q812E4,Q99MH3,Q9Z2L0 |
| 5583 | 1,4,8,25,2 2,3,5,6,7,2<br>7,28,30,31 6,29,32 | 1  | Q9QYP1                                                                                            |
| 5584 | 1,4,8,25,2 2,3,5,6,7,2<br>7,28,30,32 6,29,31 | 2  | P20766,Q6AYR9                                                                                     |
| 5585 | 1,4,8,25,2 2,3,5,6,7,2<br>7,28,31,32 6,29,30 | 2  | P36374,Q6AYR9                                                                                     |
| 5586 | 1,4,8,25,2 2,3,5,6,7,2<br>7,29,30,31 6,28,32 | 1  | Q9QYP1                                                                                            |
| 5587 | 1,4,8,25,2 2,3,5,6,7,2<br>7,29,30,32 6,28,31 | 3  | P00762,P20766,Q5RLM2                                                                              |
| 5588 | 1,4,8,25,2 2,3,5,6,7,2<br>7,29,31,32 6,28,30 | 1  | P00762                                                                                            |

|      |                                              |                                                                                                                               |
|------|----------------------------------------------|-------------------------------------------------------------------------------------------------------------------------------|
| 5589 | 1,4,8,25,2 2,3,5,6,7,2<br>7,30,31,32 6,28,29 | 4 P00762,P47967,P54921,Q9QYP1                                                                                                 |
| 5590 | 1,4,8,25,2 2,3,5,6,7,2<br>8,29,30,31 6,27,32 | 3 P01039,P50116,Q9JJ50                                                                                                        |
| 5591 | 1,4,8,25,2 2,3,5,6,7,2<br>8,29,30,32 6,27,31 | 5 P01039,P20766,P30120,P50116,Q62714                                                                                          |
| 5592 | 1,4,8,25,2 2,3,5,6,7,2<br>8,29,31,32 6,27,30 | 6 P01039,P21588,P30120,P36374,P50116,Q9JJ50                                                                                   |
| 5593 | 1,4,8,25,2 2,3,5,6,7,2<br>8,30,31,32 6,27,29 | 4 O08839,P47967,P50116,Q9JJ50                                                                                                 |
| 5594 | 1,4,8,25,2 2,3,5,6,7,2<br>9,30,31,32 6,27,28 | 3 P21588,P47967,P50116                                                                                                        |
| 5595 | 1,4,8,26,2 2,3,5,6,7,2<br>7,28,29,30 5,31,32 | 3 P20766,Q6AYR9,Q6P6R2                                                                                                        |
| 5596 | 1,4,8,26,2 2,3,5,6,7,2<br>7,28,29,31 5,30,32 | 4 P36374,P97523,Q63474,Q6P6R2                                                                                                 |
| 5597 | 1,4,8,26,2 2,3,5,6,7,2<br>7,28,29,32 5,30,31 | 17 O08815,O35547,O54728,P00758,P04905,P08010,P08723,P20766,P30120,P36374,P47727,Q6AY<br>R9,Q6P6R2,Q812E4,Q8CFN2,Q9QWN8,Q9Z2L0 |
| 5598 | 1,4,8,26,2 2,3,5,6,7,2<br>7,28,30,31 5,29,32 | 1 Q6AY61                                                                                                                      |
| 5599 | 1,4,8,26,2 2,3,5,6,7,2<br>7,28,30,32 5,29,31 | 6 B0LT89,O54728,P20766,Q6AYR9,Q8VD89,Q9QWN8                                                                                   |
| 5600 | 1,4,8,26,2 2,3,5,6,7,2<br>7,28,31,32 5,29,30 | 4 O54728,P36374,Q6AYR9,Q9QWN8                                                                                                 |
| 5601 | 1,4,8,26,2 2,3,5,6,7,2<br>7,29,30,31 5,28,32 | 2 Q63474,Q6AY61                                                                                                               |
| 5602 | 1,4,8,26,2 2,3,5,6,7,2<br>7,29,30,32 5,28,31 | 1 P20766                                                                                                                      |
| 5603 | 1,4,8,26,2 2,3,5,6,7,2<br>7,29,31,32 5,28,30 | 2 O54728,Q63474                                                                                                               |
| 5604 | 1,4,8,26,2 2,3,5,6,7,2<br>7,30,31,32 5,28,29 | 4 O54728,P54921,Q6AY61,Q9QYP1                                                                                                 |
| 5605 | 1,4,8,26,2 2,3,5,6,7,2<br>8,29,30,31 5,27,32 | 3 P01039,P50116,Q63474                                                                                                        |
| 5606 | 1,4,8,26,2 2,3,5,6,7,2<br>8,29,30,32 5,27,31 | 5 O54728,P01039,P20766,P30120,P50116                                                                                          |
| 5607 | 1,4,8,26,2 2,3,5,6,7,2<br>8,29,31,32 5,27,30 | 5 O54728,P01039,P30120,P50116,Q63474                                                                                          |
| 5608 | 1,4,8,26,2 2,3,5,6,7,2<br>8,30,31,32 5,27,29 | 3 O08839,O54728,P50116                                                                                                        |

|      |                               |                        |    |                                                                              |
|------|-------------------------------|------------------------|----|------------------------------------------------------------------------------|
| 5609 | 1,4,8,26,2<br>9,30,31,32      | 2,3,5,6,7,2<br>5,27,28 | 5  | O54728,P50115,P50116,P63081,Q63474                                           |
| 5610 | 1,4,8,27,2<br>8,29,30,31      | 2,3,5,6,7,2<br>5,26,32 | 1  | Q63474                                                                       |
| 5611 | 1,4,8,27,2<br>8,29,30,32      | 2,3,5,6,7,2<br>5,26,31 | 11 | O35547,P00758,P08723,P18298,P20766,P36374,P60905,Q63150,Q6AYR9,Q812E4,Q9Z2L0 |
| 5612 | 1,4,8,27,2<br>8,29,31,32      | 2,3,5,6,7,2<br>5,26,30 | 9  | O08815,O35547,P08723,P30120,P36374,P47727,Q63474,Q6AYR9,Q812E4               |
| 5613 | 1,4,8,27,2<br>8,30,31,32      | 2,3,5,6,7,2<br>5,26,29 | 4  | B0LT89,P36374,Q6AYR9,Q8VD89                                                  |
| 5614 | 1,4,8,27,2<br>9,30,31,32      | 2,3,5,6,7,2<br>5,26,28 | 2  | B0BNN3,Q63474                                                                |
| 5615 | 1,4,8,28,2<br>9,30,31,32      | 2,3,5,6,7,2<br>5,26,27 | 5  | P01039,P50115,P50116,Q63474,Q9JJ50                                           |
| 5616 | 1,4,25,26,<br>27,28,29,3<br>0 | 2,3,5,6,7,8<br>,31,32  | 2  | P20766,Q62714                                                                |
| 5617 | 1,4,25,26,<br>27,28,29,3<br>1 | 2,3,5,6,7,8<br>,30,32  | 4  | P10758,P20646,P35280,P36374                                                  |
| 5618 | 1,4,25,26,<br>27,28,29,3<br>2 | 2,3,5,6,7,8<br>,30,31  | 8  | O35547,P00758,P20766,P36374,Q5RJR2,Q6AYR8,Q6AYR9,Q8CGS4                      |
| 5619 | 1,4,25,26,<br>27,28,30,3<br>1 | 2,3,5,6,7,8<br>,29,32  | 1  | Q9QYP1                                                                       |
| 5620 | 1,4,25,26,<br>27,28,30,3<br>2 | 2,3,5,6,7,8<br>,29,31  | 2  | O70594,P20766                                                                |
| 5621 | 1,4,25,26,<br>27,28,31,3<br>2 | 2,3,5,6,7,8<br>,29,30  | 5  | O54728,P36374,P62804,Q5RJR2,Q9QYP1                                           |
| 5622 | 1,4,25,26,<br>27,29,30,3<br>1 | 2,3,5,6,7,8<br>,28,32  | 1  | Q9QYP1                                                                       |
| 5623 | 1,4,25,26,<br>27,29,30,3<br>2 | 2,3,5,6,7,8<br>,28,31  | 5  | D3ZUC6,P20766,P36376,P50115,Q63532                                           |
| 5624 | 1,4,25,26,<br>27,29,31,3<br>2 | 2,3,5,6,7,8<br>,28,30  | 3  | P19218,P62804,Q9QYP1                                                         |



|      |                               |                       |    |                                                                              |
|------|-------------------------------|-----------------------|----|------------------------------------------------------------------------------|
| 5625 | 1,4,25,26,<br>27,30,31,3<br>2 | 2,3,5,6,7,8<br>,28,29 | 8  | D3ZUC6,P21674,P47967,P50115,P54921,P62804,Q00715,Q9QYP1                      |
| 5626 | 1,4,25,26,<br>28,29,30,3<br>1 | 2,3,5,6,7,8<br>,27,32 | 6  | P01039,P50115,P50116,Q62714,Q9JJ50,Q9QZQ5                                    |
| 5627 | 1,4,25,26,<br>28,29,30,3<br>2 | 2,3,5,6,7,8<br>,27,31 | 7  | P00731,P01039,P20766,P36376,P50115,P50116,Q62714                             |
| 5628 | 1,4,25,26,<br>28,29,31,3<br>2 | 2,3,5,6,7,8<br>,27,30 | 8  | O54728,P00731,P01039,P19218,P36374,P50115,P50116,P62804                      |
| 5629 | 1,4,25,26,<br>28,30,31,3<br>2 | 2,3,5,6,7,8<br>,27,29 | 11 | O08839,O54728,P00731,P25809,P47967,P50115,P50116,P62804,Q00715,Q4G075,Q9JJ50 |
| 5630 | 1,4,25,26,<br>29,30,31,3<br>2 | 2,3,5,6,7,8<br>,27,28 | 9  | D3ZUC6,P00507,P19218,P25809,P47967,P50115,P50116,P62804,Q00715               |
| 5631 | 1,4,25,27,<br>28,29,30,3<br>1 | 2,3,5,6,7,8<br>,26,32 | 4  | P50115,Q62714,Q99MH3,Q9QYP1                                                  |
| 5632 | 1,4,25,27,<br>28,29,30,3<br>2 | 2,3,5,6,7,8<br>,26,31 | 7  | P00758,P20766,P36374,P50115,Q62714,Q6AYR9,Q99MH3                             |
| 5633 | 1,4,25,27,<br>28,29,31,3<br>2 | 2,3,5,6,7,8<br>,26,30 | 8  | O08815,O35547,P10758,P36374,P50115,Q6AYR9,Q8CGS4,Q99MH3                      |
| 5634 | 1,4,25,27,<br>28,30,31,3<br>2 | 2,3,5,6,7,8<br>,26,29 | 7  | O70594,P06760,P36374,P50115,P62804,Q9QX74,Q9QYP1                             |
| 5635 | 1,4,25,27,<br>29,30,31,3<br>2 | 2,3,5,6,7,8<br>,26,28 | 5  | D3ZUC6,P47967,P50115,Q5RLM2,Q9QYP1                                           |
| 5636 | 1,4,25,28,<br>29,30,31,3<br>2 | 2,3,5,6,7,8<br>,26,27 | 3  | P50115,P50116,Q9JJ50                                                         |
| 5637 | 1,4,26,27,<br>28,29,30,3<br>1 | 2,3,5,6,7,8<br>,25,32 | 2  | P50115,Q63474                                                                |

|      |                               |                          |   |                                                  |
|------|-------------------------------|--------------------------|---|--------------------------------------------------|
| 5638 | 1,4,26,27,<br>28,29,30,3<br>2 | 2,3,5,6,7,8<br>,25,31    | 5 | P00758,P20766,P36376,P50115,Q6AYR9               |
| 5639 | 1,4,26,27,<br>28,29,31,3<br>2 | 2,3,5,6,7,8<br>,25,30    | 7 | O35547,O54728,P36374,P50115,Q63474,Q6AYR9,Q8CGS4 |
| 5640 | 1,4,26,27,<br>28,30,31,3<br>2 | 2,3,5,6,7,8<br>,25,29    | 7 | O54728,O70594,P22006,P36374,P50115,P62804,Q8VD89 |
| 5641 | 1,4,26,27,<br>29,30,31,3<br>2 | 2,3,5,6,7,8<br>,25,28    | 3 | P02631,P36860,P50115                             |
| 5642 | 1,4,26,28,<br>29,30,31,3<br>2 | 2,3,5,6,7,8<br>,25,27    | 4 | O54728,P50115,P50116,Q63474                      |
| 5643 | 1,4,27,28,<br>29,30,31,3<br>2 | 2,3,5,6,7,8<br>,25,26    | 3 | P36374,P50115,Q63474                             |
| 5644 | 1,5,6,7,8,2<br>5,26,27        | 2,3,4,28,2<br>9,30,31,32 | 4 | P13432,P50115,P50116,Q9WTT6                      |
| 5645 | 1,5,6,7,8,2<br>5,26,28        | 2,3,4,27,2<br>9,30,31,32 | 6 | P00762,P13432,P35745,P80299,Q9QW07,Q9WTT6        |
| 5646 | 1,5,6,7,8,2<br>5,26,29        | 2,3,4,27,2<br>8,30,31,32 | 4 | P06760,P13432,P49134,Q9QX74                      |
| 5647 | 1,5,6,7,8,2<br>5,26,30        | 2,3,4,27,2<br>8,29,31,32 | 4 | P35745,P49134,P80299,Q9WVK7                      |
| 5648 | 1,5,6,7,8,2<br>5,26,31        | 2,3,4,27,2<br>8,29,30,32 | 5 | P13432,P35745,P49134,P57113,Q9WVK7               |
| 5649 | 1,5,6,7,8,2<br>5,26,32        | 2,3,4,27,2<br>8,29,30,31 | 3 | P13432,Q5PQL7,Q9WVK7                             |
| 5650 | 1,5,6,7,8,2<br>5,27,28        | 2,3,4,26,2<br>9,30,31,32 | 5 | P06911,P50115,P50116,P63081,Q9QW07               |
| 5651 | 1,5,6,7,8,2<br>5,27,29        | 2,3,4,26,2<br>8,30,31,32 | 3 | P06760,P50115,Q4G075                             |
| 5652 | 1,5,6,7,8,2<br>5,27,30        | 2,3,4,26,2<br>8,29,31,32 | 2 | P19218,Q6IG05                                    |
| 5653 | 1,5,6,7,8,2<br>5,27,31        | 2,3,4,26,2<br>8,29,30,32 | 2 | P23739,P50115                                    |
| 5654 | 1,5,6,7,8,2<br>5,27,32        | 2,3,4,26,2<br>8,29,30,31 | 2 | P13432,Q03191                                    |

|      |                        |                          |                                                                                        |
|------|------------------------|--------------------------|----------------------------------------------------------------------------------------|
| 5655 | 1,5,6,7,8,2<br>5,28,29 | 2,3,4,26,2<br>7,30,31,32 | 5 P00762,P06760,P06911,P21674,Q9QW07                                                   |
| 5656 | 1,5,6,7,8,2<br>5,28,30 | 2,3,4,26,2<br>7,29,31,32 | 3 P35745,Q5PQL7,Q9QW07                                                                 |
| 5657 | 1,5,6,7,8,2<br>5,28,31 | 2,3,4,26,2<br>7,29,30,32 | 2 P06911,P35745                                                                        |
| 5658 | 1,5,6,7,8,2<br>5,28,32 | 2,3,4,26,2<br>7,29,30,31 | 3 P13432,Q5PQL7,Q9QW07                                                                 |
| 5659 | 1,5,6,7,8,2<br>5,29,30 | 2,3,4,26,2<br>7,28,31,32 | 1 P35745                                                                               |
| 5660 | 1,5,6,7,8,2<br>5,29,31 | 2,3,4,26,2<br>7,28,30,32 | 1 P06760                                                                               |
| 5661 | 1,5,6,7,8,2<br>5,29,32 | 2,3,4,26,2<br>7,28,30,31 | 1 P13432                                                                               |
| 5662 | 1,5,6,7,8,2<br>5,30,31 | 2,3,4,26,2<br>7,28,29,32 | 2 P35745,Q9WVK7                                                                        |
| 5663 | 1,5,6,7,8,2<br>5,30,32 | 2,3,4,26,2<br>7,28,29,31 | 3 P35745,Q5PQL7,Q9WVK7                                                                 |
| 5664 | 1,5,6,7,8,2<br>5,31,32 | 2,3,4,26,2<br>7,28,29,30 | 2 P13432,Q9WVK7                                                                        |
| 5665 | 1,5,6,7,8,2<br>6,27,28 | 2,3,4,25,2<br>9,30,31,32 | 6 D3ZUC6,P07150,P29315,P50116,Q9QW07,Q9WTT6                                            |
| 5666 | 1,5,6,7,8,2<br>6,27,29 | 2,3,4,25,2<br>8,30,31,32 | 7 P06760,P29315,P50116,Q4G075,Q9JJ50,Q9QX74,Q9WTT6                                     |
| 5667 | 1,5,6,7,8,2<br>6,27,30 | 2,3,4,25,2<br>8,29,31,32 | 4 P19218,P29315,P35745,P50116                                                          |
| 5668 | 1,5,6,7,8,2<br>6,27,31 | 2,3,4,25,2<br>8,29,30,32 | 2 P50116,Q62714                                                                        |
| 5669 | 1,5,6,7,8,2<br>6,27,32 | 2,3,4,25,2<br>8,29,30,31 | 3 P13432,P29315,P50116                                                                 |
| 5670 | 1,5,6,7,8,2<br>6,28,29 | 2,3,4,25,2<br>7,30,31,32 | 12 D3ZUC6,P00762,P06760,P21674,P29315,P35745,P49134,Q6P6R2,Q9QW07,Q9QX74,Q9QYP1,Q9WTT6 |
| 5671 | 1,5,6,7,8,2<br>6,28,30 | 2,3,4,25,2<br>7,29,31,32 | 4 P00762,P29315,P35745,P49134                                                          |
| 5672 | 1,5,6,7,8,2<br>6,28,31 | 2,3,4,25,2<br>7,29,30,32 | 4 P00762,P35745,P49134,P57113                                                          |
| 5673 | 1,5,6,7,8,2<br>6,28,32 | 2,3,4,25,2<br>7,29,30,31 | 4 P13432,P29315,P35745,Q9QW07                                                          |
| 5674 | 1,5,6,7,8,2<br>6,29,30 | 2,3,4,25,2<br>7,28,31,32 | 6 P00762,P06760,P29315,P35745,P49134,Q9QX74                                            |

|      |                        |                          |    |                                                                                            |
|------|------------------------|--------------------------|----|--------------------------------------------------------------------------------------------|
| 5675 | 1,5,6,7,8,2<br>6,29,31 | 2,3,4,25,2<br>7,28,30,32 | 5  | P00762,P06760,P35745,P49134,Q9QX74                                                         |
| 5676 | 1,5,6,7,8,2<br>6,29,32 | 2,3,4,25,2<br>7,28,30,31 | 4  | P06760,P13432,P29315,Q9QX74                                                                |
| 5677 | 1,5,6,7,8,2<br>6,30,31 | 2,3,4,25,2<br>7,28,29,32 | 4  | P35745,P49134,Q5RJR2,Q9WVK7                                                                |
| 5678 | 1,5,6,7,8,2<br>6,30,32 | 2,3,4,25,2<br>7,28,29,31 | 3  | P29315,P35745,Q9WVK7                                                                       |
| 5679 | 1,5,6,7,8,2<br>6,31,32 | 2,3,4,25,2<br>7,28,29,30 | 5  | P13432,P35745,P57113,Q62714,Q9WVK7                                                         |
| 5680 | 1,5,6,7,8,2<br>7,28,29 | 2,3,4,25,2<br>6,30,31,32 | 13 | D3ZUC6,P06760,P06761,P19218,P21674,P22283,P29315,P47967,Q4G075,Q63493,Q63617,Q812E4,Q9QW07 |
| 5681 | 1,5,6,7,8,2<br>7,28,30 | 2,3,4,25,2<br>6,29,31,32 | 3  | P19218,P29315,P35745                                                                       |
| 5682 | 1,5,6,7,8,2<br>7,28,31 | 2,3,4,25,2<br>6,29,30,32 | 3  | D3ZUC6,P19218,P35745                                                                       |
| 5683 | 1,5,6,7,8,2<br>7,28,32 | 2,3,4,25,2<br>6,29,30,31 | 8  | P19218,P22282,P22283,P29315,Q6AYR9,Q812E4,Q9JI85,Q9QW07                                    |
| 5684 | 1,5,6,7,8,2<br>7,29,30 | 2,3,4,25,2<br>6,28,31,32 | 3  | P19218,P29315,Q6IMF3                                                                       |
| 5685 | 1,5,6,7,8,2<br>7,29,31 | 2,3,4,25,2<br>6,28,30,32 | 1  | P06760                                                                                     |
| 5686 | 1,5,6,7,8,2<br>7,29,32 | 2,3,4,25,2<br>6,28,30,31 | 1  | P29315                                                                                     |
| 5687 | 1,5,6,7,8,2<br>7,30,31 | 2,3,4,25,2<br>6,28,29,32 | 3  | P19218,P35745,Q6IG05                                                                       |
| 5688 | 1,5,6,7,8,2<br>7,30,32 | 2,3,4,25,2<br>6,28,29,31 | 2  | P19218,P29315                                                                              |
| 5689 | 1,5,6,7,8,2<br>7,31,32 | 2,3,4,25,2<br>6,28,29,30 | 2  | P23739,Q62714                                                                              |
| 5690 | 1,5,6,7,8,2<br>8,29,30 | 2,3,4,25,2<br>6,27,31,32 | 6  | P00762,P19218,P21674,P29315,P35745,Q9QW07                                                  |
| 5691 | 1,5,6,7,8,2<br>8,29,31 | 2,3,4,25,2<br>6,27,30,32 | 6  | D3ZUC6,P00762,P06760,P21674,P35745,Q63493                                                  |
| 5692 | 1,5,6,7,8,2<br>8,29,32 | 2,3,4,25,2<br>6,27,30,31 | 8  | P21674,P29315,P30120,Q63493,Q63617,Q812E4,Q9QW07,Q9QYP1                                    |
| 5693 | 1,5,6,7,8,2<br>8,30,31 | 2,3,4,25,2<br>6,27,29,32 | 3  | P00762,P19218,P35745                                                                       |
| 5694 | 1,5,6,7,8,2<br>8,30,32 | 2,3,4,25,2<br>6,27,29,31 | 3  | P19218,P29315,P35745                                                                       |

|      |                         |                          |                                      |
|------|-------------------------|--------------------------|--------------------------------------|
| 5695 | 1,5,6,7,8,2<br>8,31,32  | 2,3,4,25,2<br>6,27,29,30 | 1 P35745                             |
| 5696 | 1,5,6,7,8,2<br>9,30,31  | 2,3,4,25,2<br>6,27,28,32 | 5 P35745,P36860,P49134,Q5RJR2,Q9QWN8 |
| 5697 | 1,5,6,7,8,2<br>9,30,32  | 2,3,4,25,2<br>6,27,28,31 | 3 P29315,P35745,P36860               |
| 5698 | 1,5,6,7,8,2<br>9,31,32  | 2,3,4,25,2<br>6,27,28,30 | 1 P36860                             |
| 5699 | 1,5,6,7,8,3<br>0,31,32  | 2,3,4,25,2<br>6,27,28,29 | 3 P35745,P36860,Q9WVK7               |
| 5700 | 1,5,6,7,25,<br>26,27,28 | 2,3,4,8,29,<br>30,31,32  | 1 P63081                             |
| 5701 | 1,5,6,7,25,<br>26,27,29 | 2,3,4,8,28,<br>30,31,32  | 1 P05539                             |
| 5702 | 1,5,6,7,25,<br>26,27,30 | 2,3,4,8,28,<br>29,31,32  | 1 P21588                             |
| 5703 | 1,5,6,7,25,<br>26,27,31 | 2,3,4,8,28,<br>29,30,32  | 0                                    |
| 5704 | 1,5,6,7,25,<br>26,27,32 | 2,3,4,8,28,<br>29,30,31  | 1 Q03191                             |
| 5705 | 1,5,6,7,25,<br>26,28,29 | 2,3,4,8,27,<br>30,31,32  | 3 P00762,P02625,P05539               |
| 5706 | 1,5,6,7,25,<br>26,28,30 | 2,3,4,8,27,<br>29,31,32  | 2 P00762,Q5PQL7                      |
| 5707 | 1,5,6,7,25,<br>26,28,31 | 2,3,4,8,27,<br>29,30,32  | 1 P00762                             |
| 5708 | 1,5,6,7,25,<br>26,28,32 | 2,3,4,8,27,<br>29,30,31  | 2 Q5PQL7,Q6IG02                      |
| 5709 | 1,5,6,7,25,<br>26,29,30 | 2,3,4,8,27,<br>28,31,32  | 3 P00762,P36376,Q9WVK7               |
| 5710 | 1,5,6,7,25,<br>26,29,31 | 2,3,4,8,27,<br>28,30,32  | 2 P00762,Q9WVK7                      |
| 5711 | 1,5,6,7,25,<br>26,29,32 | 2,3,4,8,27,<br>28,30,31  | 2 P36376,Q9WVK7                      |
| 5712 | 1,5,6,7,25,<br>26,30,31 | 2,3,4,8,27,<br>28,29,32  | 2 P25809,Q9WVK7                      |
| 5713 | 1,5,6,7,25,<br>26,30,32 | 2,3,4,8,27,<br>28,29,31  | 4 P36376,Q5PQL7,Q9R168,Q9WVK7        |
| 5714 | 1,5,6,7,25,<br>26,31,32 | 2,3,4,8,27,<br>28,29,30  | 2 P25809,Q9WVK7                      |

|      |                                              |                                      |
|------|----------------------------------------------|--------------------------------------|
| 5715 | 1,5,6,7,25, 2,3,4,8,26,<br>27,28,29 30,31,32 | 4 P05539,P63081,P97615,Q9WUC4        |
| 5716 | 1,5,6,7,25, 2,3,4,8,26,<br>27,28,30 29,31,32 | 0                                    |
| 5717 | 1,5,6,7,25, 2,3,4,8,26,<br>27,28,31 29,30,32 | 0                                    |
| 5718 | 1,5,6,7,25, 2,3,4,8,26,<br>27,28,32 29,30,31 | 2 Q03191,Q62761;Q62762;Q62763        |
| 5719 | 1,5,6,7,25, 2,3,4,8,26,<br>27,29,30 28,31,32 | 2 O54728,P05539                      |
| 5720 | 1,5,6,7,25, 2,3,4,8,26,<br>27,29,31 28,30,32 | 2 O54728,P05539                      |
| 5721 | 1,5,6,7,25, 2,3,4,8,26,<br>27,29,32 28,30,31 | 2 P05539,Q03191                      |
| 5722 | 1,5,6,7,25, 2,3,4,8,26,<br>27,30,31 28,29,32 | 1 O54728                             |
| 5723 | 1,5,6,7,25, 2,3,4,8,26,<br>27,30,32 28,29,31 | 1 Q03191                             |
| 5724 | 1,5,6,7,25, 2,3,4,8,26,<br>27,31,32 28,29,30 | 2 P23739,Q03191                      |
| 5725 | 1,5,6,7,25, 2,3,4,8,26,<br>28,29,30 27,31,32 | 3 P00762,P05539,Q5BJY9               |
| 5726 | 1,5,6,7,25, 2,3,4,8,26,<br>28,29,31 27,30,32 | 2 P00762,P05539                      |
| 5727 | 1,5,6,7,25, 2,3,4,8,26,<br>28,29,32 27,30,31 | 2 P05539,Q5BJY9                      |
| 5728 | 1,5,6,7,25, 2,3,4,8,26,<br>28,30,31 27,29,32 | 4 P00762,P25809,P35745,Q5BJY9        |
| 5729 | 1,5,6,7,25, 2,3,4,8,26,<br>28,30,32 27,29,31 | 3 Q5BJY9,Q5PQL7,Q62975               |
| 5730 | 1,5,6,7,25, 2,3,4,8,26,<br>28,31,32 27,29,30 | 1 Q5BJY9                             |
| 5731 | 1,5,6,7,25, 2,3,4,8,26,<br>29,30,31 27,28,32 | 5 O54728,P36860,Q5BJY9,Q9QWN8,Q9WVK7 |
| 5732 | 1,5,6,7,25, 2,3,4,8,26,<br>29,30,32 27,28,31 | 4 P36376,P36860,Q5BJY9,Q9WVK7        |
| 5733 | 1,5,6,7,25, 2,3,4,8,26,<br>29,31,32 27,28,30 | 3 P36860,Q5BJY9,Q9WVK7               |
| 5734 | 1,5,6,7,25, 2,3,4,8,26,<br>30,31,32 27,28,29 | 5 P25809,P36860,Q5BJY9,Q6P6R2,Q9WVK7 |

|      |                                              |                                             |
|------|----------------------------------------------|---------------------------------------------|
| 5735 | 1,5,6,7,26, 2,3,4,8,25,<br>27,28,29 30,31,32 | 6 P00762,P02625,P05539,P21588,P29315,P47967 |
| 5736 | 1,5,6,7,26, 2,3,4,8,25,<br>27,28,30 29,31,32 | 3 P00762,P21588,P29315                      |
| 5737 | 1,5,6,7,26, 2,3,4,8,25,<br>27,28,31 29,30,32 | 2 O88797,P00762                             |
| 5738 | 1,5,6,7,26, 2,3,4,8,25,<br>27,28,32 29,30,31 | 1 P29315                                    |
| 5739 | 1,5,6,7,26, 2,3,4,8,25,<br>27,29,30 28,31,32 | 5 P21588,P29315,P36376,Q811M5,Q923V8        |
| 5740 | 1,5,6,7,26, 2,3,4,8,25,<br>27,29,31 28,30,32 | 2 P02625,P05539                             |
| 5741 | 1,5,6,7,26, 2,3,4,8,25,<br>27,29,32 28,30,31 | 3 P29315,P36376,Q9JJ50                      |
| 5742 | 1,5,6,7,26, 2,3,4,8,25,<br>27,30,31 28,29,32 | 1 P36860                                    |
| 5743 | 1,5,6,7,26, 2,3,4,8,25,<br>27,30,32 28,29,31 | 3 P29315,P36376,P36860                      |
| 5744 | 1,5,6,7,26, 2,3,4,8,25,<br>27,31,32 28,29,30 | 2 P36860,Q62714                             |
| 5745 | 1,5,6,7,26, 2,3,4,8,25,<br>28,29,30 27,31,32 | 4 P00762,P01835,P29315,P35745               |
| 5746 | 1,5,6,7,26, 2,3,4,8,25,<br>28,29,31 27,30,32 | 6 P00762,P01835,P02625,P05539,P70549,Q01205 |
| 5747 | 1,5,6,7,26, 2,3,4,8,25,<br>28,29,32 27,30,31 | 4 P01835,P02625,P29315,P36376               |
| 5748 | 1,5,6,7,26, 2,3,4,8,25,<br>28,30,31 27,29,32 | 2 P00762,P35745                             |
| 5749 | 1,5,6,7,26, 2,3,4,8,25,<br>28,30,32 27,29,31 | 2 P29315,Q5PQL7                             |
| 5750 | 1,5,6,7,26, 2,3,4,8,25,<br>28,31,32 27,29,30 | 2 P22006,Q6IG02                             |
| 5751 | 1,5,6,7,26, 2,3,4,8,25,<br>29,30,31 27,28,32 | 5 P00762,P01835,P35745,P36860,Q9QWN8        |
| 5752 | 1,5,6,7,26, 2,3,4,8,25,<br>29,30,32 27,28,31 | 5 P01835,P29315,P36376,P36860,Q5BJY9        |
| 5753 | 1,5,6,7,26, 2,3,4,8,25,<br>29,31,32 27,28,30 | 3 O70417,P01835,P36860                      |
| 5754 | 1,5,6,7,26, 2,3,4,8,25,<br>30,31,32 27,28,29 | 3 P25809,P36860,Q9WVK7                      |

|      |                                              |                                                                  |
|------|----------------------------------------------|------------------------------------------------------------------|
| 5755 | 1,5,6,7,27, 2,3,4,8,25,<br>28,29,30 26,31,32 | 4 P00762,P05539,P19218,P29315                                    |
| 5756 | 1,5,6,7,27, 2,3,4,8,25,<br>28,29,31 26,30,32 | 3 P00762,P02625,P05539                                           |
| 5757 | 1,5,6,7,27, 2,3,4,8,25,<br>28,29,32 26,30,31 | 7 O35547,P05539,P22283,P29315,Q62761;Q62762;Q62763,Q6AY61,Q812E4 |
| 5758 | 1,5,6,7,27, 2,3,4,8,25,<br>28,30,31 26,29,32 | 2 P19218,P35745                                                  |
| 5759 | 1,5,6,7,27, 2,3,4,8,25,<br>28,30,32 26,29,31 | 3 P19218,P29315,Q8VD89                                           |
| 5760 | 1,5,6,7,27, 2,3,4,8,25,<br>28,31,32 26,29,30 | 1 P22006                                                         |
| 5761 | 1,5,6,7,27, 2,3,4,8,25,<br>29,30,31 26,28,32 | 2 O54728,P36860                                                  |
| 5762 | 1,5,6,7,27, 2,3,4,8,25,<br>29,30,32 26,28,31 | 3 P29315,P36376,P36860                                           |
| 5763 | 1,5,6,7,27, 2,3,4,8,25,<br>29,31,32 26,28,30 | 1 P36860                                                         |
| 5764 | 1,5,6,7,27, 2,3,4,8,25,<br>30,31,32 26,28,29 | 1 P36860                                                         |
| 5765 | 1,5,6,7,28, 2,3,4,8,25,<br>29,30,31 26,27,32 | 6 P00762,P01835,P05539,P35745,P36860,Q5BJY9                      |
| 5766 | 1,5,6,7,28, 2,3,4,8,25,<br>29,30,32 26,27,31 | 4 P01835,P29315,P36860,Q5BJY9                                    |
| 5767 | 1,5,6,7,28, 2,3,4,8,25,<br>29,31,32 26,27,30 | 4 O70417,P01835,P05539,Q5BJY9                                    |
| 5768 | 1,5,6,7,28, 2,3,4,8,25,<br>30,31,32 26,27,29 | 4 P22006,P35745,P36860,Q5BJY9                                    |
| 5769 | 1,5,6,7,29, 2,3,4,8,25,<br>30,31,32 26,27,28 | 5 P01835,P26342,P36860,Q5BJY9,Q9WVK7                             |
| 5770 | 1,5,6,8,25, 2,3,4,7,29,<br>26,27,28 30,31,32 | 2 P26342,P80299                                                  |
| 5771 | 1,5,6,8,25, 2,3,4,7,28,<br>26,27,29 30,31,32 | 2 P13432,P80299                                                  |
| 5772 | 1,5,6,8,25, 2,3,4,7,28,<br>26,27,30 29,31,32 | 1 P80299                                                         |
| 5773 | 1,5,6,8,25, 2,3,4,7,28,<br>26,27,31 29,30,32 | 3 P13432,P23739,P54921                                           |
| 5774 | 1,5,6,8,25, 2,3,4,7,28,<br>26,27,32 29,30,31 | 1 P13432                                                         |



|      |                                              |                                      |
|------|----------------------------------------------|--------------------------------------|
| 5775 | 1,5,6,8,25, 2,3,4,7,27,<br>26,28,29 30,31,32 | 4 P13432,P20766,P80299,Q9QW07        |
| 5776 | 1,5,6,8,25, 2,3,4,7,27,<br>26,28,30 29,31,32 | 3 P35745,P80299,Q5PQL7               |
| 5777 | 1,5,6,8,25, 2,3,4,7,27,<br>26,28,31 29,30,32 | 3 P00714,P13432,P80299               |
| 5778 | 1,5,6,8,25, 2,3,4,7,27,<br>26,28,32 29,30,31 | 3 P13432,P80299,Q5PQL7               |
| 5779 | 1,5,6,8,25, 2,3,4,7,27,<br>26,29,30 28,31,32 | 1 P80299                             |
| 5780 | 1,5,6,8,25, 2,3,4,7,27,<br>26,29,31 28,30,32 | 2 P13432,P70549                      |
| 5781 | 1,5,6,8,25, 2,3,4,7,27,<br>26,29,32 28,30,31 | 2 P00507,P13432                      |
| 5782 | 1,5,6,8,25, 2,3,4,7,27,<br>26,30,31 28,29,32 | 4 P35745,P54921,P80299,Q9WVK7        |
| 5783 | 1,5,6,8,25, 2,3,4,7,27,<br>26,30,32 28,29,31 | 5 P00507,P13432,P80299,Q5PQL7,Q9WVK7 |
| 5784 | 1,5,6,8,25, 2,3,4,7,27,<br>26,31,32 28,29,30 | 4 P00507,P13432,Q80WL1,Q9WVK7        |
| 5785 | 1,5,6,8,25, 2,3,4,7,26,<br>27,28,29 30,31,32 | 3 P20766,Q812E4,Q9QW07               |
| 5786 | 1,5,6,8,25, 2,3,4,7,26,<br>27,28,30 29,31,32 | 3 P19218,P20766,P80299               |
| 5787 | 1,5,6,8,25, 2,3,4,7,26,<br>27,28,31 29,30,32 | 1 P23739                             |
| 5788 | 1,5,6,8,25, 2,3,4,7,26,<br>27,28,32 29,30,31 | 3 P13432,Q6AYR9,Q9QWN8               |
| 5789 | 1,5,6,8,25, 2,3,4,7,26,<br>27,29,30 28,31,32 | 1 Q6IMF3                             |
| 5790 | 1,5,6,8,25, 2,3,4,7,26,<br>27,29,31 28,30,32 | 0                                    |
| 5791 | 1,5,6,8,25, 2,3,4,7,26,<br>27,29,32 28,30,31 | 1 P13432                             |
| 5792 | 1,5,6,8,25, 2,3,4,7,26,<br>27,30,31 28,29,32 | 3 P23739,P54921,Q6IG05               |
| 5793 | 1,5,6,8,25, 2,3,4,7,26,<br>27,30,32 28,29,31 | 1 Q63424                             |
| 5794 | 1,5,6,8,25, 2,3,4,7,26,<br>27,31,32 28,29,30 | 3 P13432,P23739,Q80WL1               |

|      |                                              |                               |
|------|----------------------------------------------|-------------------------------|
| 5795 | 1,5,6,8,25, 2,3,4,7,26,<br>28,29,30 27,31,32 | 2 P20766,P80299               |
| 5796 | 1,5,6,8,25, 2,3,4,7,26,<br>28,29,31 27,30,32 | 0                             |
| 5797 | 1,5,6,8,25, 2,3,4,7,26,<br>28,29,32 27,30,31 | 3 P13432,P20766,Q9QW07        |
| 5798 | 1,5,6,8,25, 2,3,4,7,26,<br>28,30,31 27,29,32 | 1 P35745                      |
| 5799 | 1,5,6,8,25, 2,3,4,7,26,<br>28,30,32 27,29,31 | 2 P20766,Q5PQL7               |
| 5800 | 1,5,6,8,25, 2,3,4,7,26,<br>28,31,32 27,29,30 | 2 P13432,Q80WL1               |
| 5801 | 1,5,6,8,25, 2,3,4,7,26,<br>29,30,31 27,28,32 | 0                             |
| 5802 | 1,5,6,8,25, 2,3,4,7,26,<br>29,30,32 27,28,31 | 3 P13432,P20766,Q9WVK7        |
| 5803 | 1,5,6,8,25, 2,3,4,7,26,<br>29,31,32 27,28,30 | 2 P13432,Q80WL1               |
| 5804 | 1,5,6,8,25, 2,3,4,7,26,<br>30,31,32 27,28,29 | 3 P20646,P47967,Q9WVK7        |
| 5805 | 1,5,6,8,26, 2,3,4,7,25,<br>27,28,29 30,31,32 | 3 P26342,P29315,Q6P6R2        |
| 5806 | 1,5,6,8,26, 2,3,4,7,25,<br>27,28,30 29,31,32 | 2 P29315,P80299               |
| 5807 | 1,5,6,8,26, 2,3,4,7,25,<br>27,28,31 29,30,32 | 0                             |
| 5808 | 1,5,6,8,26, 2,3,4,7,25,<br>27,28,32 29,30,31 | 4 B0LT89,P29315,Q6AYR9,Q9QWN8 |
| 5809 | 1,5,6,8,26, 2,3,4,7,25,<br>27,29,30 28,31,32 | 2 P29315,Q811M5               |
| 5810 | 1,5,6,8,26, 2,3,4,7,25,<br>27,29,31 28,30,32 | 0                             |
| 5811 | 1,5,6,8,26, 2,3,4,7,25,<br>27,29,32 28,30,31 | 2 P13432,P29315               |
| 5812 | 1,5,6,8,26, 2,3,4,7,25,<br>27,30,31 28,29,32 | 0                             |
| 5813 | 1,5,6,8,26, 2,3,4,7,25,<br>27,30,32 28,29,31 | 1 P29315                      |
| 5814 | 1,5,6,8,26, 2,3,4,7,25,<br>27,31,32 28,29,30 | 2 P13432,P23739               |

|      |                                              |                                             |
|------|----------------------------------------------|---------------------------------------------|
| 5815 | 1,5,6,8,26, 2,3,4,7,25,<br>28,29,30 27,31,32 | 5 P20766,P29315,P35745,P80299,Q9QYP1        |
| 5816 | 1,5,6,8,26, 2,3,4,7,25,<br>28,29,31 27,30,32 | 2 P00762,P70549                             |
| 5817 | 1,5,6,8,26, 2,3,4,7,25,<br>28,29,32 27,30,31 | 4 P13432,P20766,P29315,Q9QYP1               |
| 5818 | 1,5,6,8,26, 2,3,4,7,25,<br>28,30,31 27,29,32 | 1 P35745                                    |
| 5819 | 1,5,6,8,26, 2,3,4,7,25,<br>28,30,32 27,29,31 | 3 P29315,P35745,Q8VD89                      |
| 5820 | 1,5,6,8,26, 2,3,4,7,25,<br>28,31,32 27,29,30 | 0                                           |
| 5821 | 1,5,6,8,26, 2,3,4,7,25,<br>29,30,31 27,28,32 | 3 P35745,P36860,Q5RJR2                      |
| 5822 | 1,5,6,8,26, 2,3,4,7,25,<br>29,30,32 27,28,31 | 2 P29315,P36860                             |
| 5823 | 1,5,6,8,26, 2,3,4,7,25,<br>29,31,32 27,28,30 | 2 P13432,P36860                             |
| 5824 | 1,5,6,8,26, 2,3,4,7,25,<br>30,31,32 27,28,29 | 5 O89117,P00507,P35745,P36860,Q9WVK7        |
| 5825 | 1,5,6,8,27, 2,3,4,7,25,<br>28,29,30 26,31,32 | 3 P19218,P20766,P29315                      |
| 5826 | 1,5,6,8,27, 2,3,4,7,25,<br>28,29,31 26,30,32 | 1 Q9R168                                    |
| 5827 | 1,5,6,8,27, 2,3,4,7,25,<br>28,29,32 26,30,31 | 5 O35547,P20766,P29315,Q6AYR9,Q812E4        |
| 5828 | 1,5,6,8,27, 2,3,4,7,25,<br>28,30,31 26,29,32 | 2 P19218,P35745                             |
| 5829 | 1,5,6,8,27, 2,3,4,7,25,<br>28,30,32 26,29,31 | 6 B0LT89,P19218,P20766,P29315,Q5I0J9,Q8VD89 |
| 5830 | 1,5,6,8,27, 2,3,4,7,25,<br>28,31,32 26,29,30 | 4 B0LT89,P22006,P23739,Q80WL1               |
| 5831 | 1,5,6,8,27, 2,3,4,7,25,<br>29,30,31 26,28,32 | 1 Q6IMF3                                    |
| 5832 | 1,5,6,8,27, 2,3,4,7,25,<br>29,30,32 26,28,31 | 3 P19218,P29315,Q5I0J9                      |
| 5833 | 1,5,6,8,27, 2,3,4,7,25,<br>29,31,32 26,28,30 | 0                                           |
| 5834 | 1,5,6,8,27, 2,3,4,7,25,<br>30,31,32 26,28,29 | 2 P20646,P23739                             |

|      |                                              |                                             |
|------|----------------------------------------------|---------------------------------------------|
| 5835 | 1,5,6,8,28, 2,3,4,7,25,<br>29,30,31 26,27,32 | 1 P35745                                    |
| 5836 | 1,5,6,8,28, 2,3,4,7,25,<br>29,30,32 26,27,31 | 2 P20766,P29315                             |
| 5837 | 1,5,6,8,28, 2,3,4,7,25,<br>29,31,32 26,27,30 | 1 Q80WL1                                    |
| 5838 | 1,5,6,8,28, 2,3,4,7,25,<br>30,31,32 26,27,29 | 4 O89117,P22006,P35745,Q8VD89               |
| 5839 | 1,5,6,8,29, 2,3,4,7,25,<br>30,31,32 26,27,28 | 2 P20646,P36860                             |
| 5840 | 1,5,6,25,2 2,3,4,7,8,3<br>6,27,28,29 0,31,32 | 6 P02625,P05539,P20766,P35280,P82471,P97615 |
| 5841 | 1,5,6,25,2 2,3,4,7,8,2<br>6,27,28,30 9,31,32 | 4 P20766,P21588,P80299,P82471               |
| 5842 | 1,5,6,25,2 2,3,4,7,8,2<br>6,27,28,31 9,30,32 | 2 P35280,P62804                             |
| 5843 | 1,5,6,25,2 2,3,4,7,8,2<br>6,27,28,32 9,30,31 | 3 P20766,P62804,P82471                      |
| 5844 | 1,5,6,25,2 2,3,4,7,8,2<br>6,27,29,30 8,31,32 | 4 P20766,P82471,Q811M5,Q923V8               |
| 5845 | 1,5,6,25,2 2,3,4,7,8,2<br>6,27,29,31 8,30,32 | 3 O70417,P05539,P35280                      |
| 5846 | 1,5,6,25,2 2,3,4,7,8,2<br>6,27,29,32 8,30,31 | 2 P20766,P82471                             |
| 5847 | 1,5,6,25,2 2,3,4,7,8,2<br>6,27,30,31 8,29,32 | 2 P54921,P62804                             |
| 5848 | 1,5,6,25,2 2,3,4,7,8,2<br>6,27,30,32 8,29,31 | 2 P62804,P82471                             |
| 5849 | 1,5,6,25,2 2,3,4,7,8,2<br>6,27,31,32 8,29,30 | 1 P62804                                    |
| 5850 | 1,5,6,25,2 2,3,4,7,8,2<br>6,28,29,30 7,31,32 | 3 P20766,P80299,P82471                      |
| 5851 | 1,5,6,25,2 2,3,4,7,8,2<br>6,28,29,31 7,30,32 | 6 O70417,P00762,P05539,P35280,P70549,Q01205 |
| 5852 | 1,5,6,25,2 2,3,4,7,8,2<br>6,28,29,32 7,30,31 | 2 P20766,P82471                             |
| 5853 | 1,5,6,25,2 2,3,4,7,8,2<br>6,28,30,31 7,29,32 | 4 P00714,P25809,Q4G075,Q6TMA8               |
| 5854 | 1,5,6,25,2 2,3,4,7,8,2<br>6,28,30,32 7,29,31 | 6 P20766,P62804,P82471,Q4G075,Q5PQL7,Q62975 |

|      |                                              |                                                                          |
|------|----------------------------------------------|--------------------------------------------------------------------------|
| 5855 | 1,5,6,25,2 2,3,4,7,8,2<br>6,28,31,32 7,29,30 | 5 O70417,P00731,P62804,Q4G075,Q6IG02                                     |
| 5856 | 1,5,6,25,2 2,3,4,7,8,2<br>6,29,30,31 7,28,32 | 3 A0JPJ7,P36860,Q9WVK7                                                   |
| 5857 | 1,5,6,25,2 2,3,4,7,8,2<br>6,29,30,32 7,28,31 | 6 P00507,P20766,P36860,P82471,Q5BJY9,Q9WVK7                              |
| 5858 | 1,5,6,25,2 2,3,4,7,8,2<br>6,29,31,32 7,28,30 | 5 O70417,P00507,P36860,P62804,Q9WVK7                                     |
| 5859 | 1,5,6,25,2 2,3,4,7,8,2<br>6,30,31,32 7,28,29 | 10 P00507,P22273,P25809,P36860,P47967,P62804,Q00715,Q4G075,Q9EQS0,Q9WVK7 |
| 5860 | 1,5,6,25,2 2,3,4,7,8,2<br>7,28,29,30 6,31,32 | 3 P05539,P20766,P82471                                                   |
| 5861 | 1,5,6,25,2 2,3,4,7,8,2<br>7,28,29,31 6,30,32 | 5 P05539,P20761,P20762,P35280,P97615                                     |
| 5862 | 1,5,6,25,2 2,3,4,7,8,2<br>7,28,29,32 6,30,31 | 5 O35547,P05539,P20766,P82471,Q62761;Q62762;Q62763                       |
| 5863 | 1,5,6,25,2 2,3,4,7,8,2<br>7,28,30,31 6,29,32 | 1 P20761                                                                 |
| 5864 | 1,5,6,25,2 2,3,4,7,8,2<br>7,28,30,32 6,29,31 | 4 P20766,P82471,Q63424,Q9QX74                                            |
| 5865 | 1,5,6,25,2 2,3,4,7,8,2<br>7,28,31,32 6,29,30 | 3 P20761,P23739,P62804                                                   |
| 5866 | 1,5,6,25,2 2,3,4,7,8,2<br>7,29,30,31 6,28,32 | 1 O54728                                                                 |
| 5867 | 1,5,6,25,2 2,3,4,7,8,2<br>7,29,30,32 6,28,31 | 2 P20766,P82471                                                          |
| 5868 | 1,5,6,25,2 2,3,4,7,8,2<br>7,29,31,32 6,28,30 | 3 O70417,P20762,P62804                                                   |
| 5869 | 1,5,6,25,2 2,3,4,7,8,2<br>7,30,31,32 6,28,29 | 7 P20646,P23739,P62804,Q63424,Q6P6R2,Q9QX74,Q9WTT6                       |
| 5870 | 1,5,6,25,2 2,3,4,7,8,2<br>8,29,30,31 6,27,32 | 4 P05539,P20761,P20762,Q5BJY9                                            |
| 5871 | 1,5,6,25,2 2,3,4,7,8,2<br>8,29,30,32 6,27,31 | 3 P20762,P20766,Q5BJY9                                                   |
| 5872 | 1,5,6,25,2 2,3,4,7,8,2<br>8,29,31,32 6,27,30 | 5 O70417,P05539,P20761,P20762,Q5BJY9                                     |
| 5873 | 1,5,6,25,2 2,3,4,7,8,2<br>8,30,31,32 6,27,29 | 10 P20761,P20762,P25809,P62804,Q00715,Q4G075,Q5BJY9,Q62975,Q9QX74,Q9WTT6 |
| 5874 | 1,5,6,25,2 2,3,4,7,8,2<br>9,30,31,32 6,27,28 | 9 P07150,P20762,P25809,P36860,P62804,Q4G075,Q5BJY9,Q9WTT6,Q9WVK7         |

|      |                                              |                                                    |
|------|----------------------------------------------|----------------------------------------------------|
| 5875 | 1,5,6,26,2 2,3,4,7,8,2<br>7,28,29,30 5,31,32 | 6 P05539,P20766,P21588,P29315,P82471,Q811M5        |
| 5876 | 1,5,6,26,2 2,3,4,7,8,2<br>7,28,29,31 5,30,32 | 4 O70417,P02625,P05539,P35280                      |
| 5877 | 1,5,6,26,2 2,3,4,7,8,2<br>7,28,29,32 5,30,31 | 7 O35547,O70417,P02625,P05539,P20766,P29315,P82471 |
| 5878 | 1,5,6,26,2 2,3,4,7,8,2<br>7,28,30,31 5,29,32 | 0                                                  |
| 5879 | 1,5,6,26,2 2,3,4,7,8,2<br>7,28,30,32 5,29,31 | 4 P20766,P29315,P82471,Q8VD89                      |
| 5880 | 1,5,6,26,2 2,3,4,7,8,2<br>7,28,31,32 5,29,30 | 3 O70417,P22006,P62804                             |
| 5881 | 1,5,6,26,2 2,3,4,7,8,2<br>7,29,30,31 5,28,32 | 2 P36860,Q811M5                                    |
| 5882 | 1,5,6,26,2 2,3,4,7,8,2<br>7,29,30,32 5,28,31 | 6 P20766,P29315,P36376,P36860,P82471,Q811M5        |
| 5883 | 1,5,6,26,2 2,3,4,7,8,2<br>7,29,31,32 5,28,30 | 3 O70417,P36860,P62804                             |
| 5884 | 1,5,6,26,2 2,3,4,7,8,2<br>7,30,31,32 5,28,29 | 3 P36860,P62804,Q8VD89                             |
| 5885 | 1,5,6,26,2 2,3,4,7,8,2<br>8,29,30,31 5,27,32 | 3 O70417,P00762,P36860                             |
| 5886 | 1,5,6,26,2 2,3,4,7,8,2<br>8,29,30,32 5,27,31 | 5 P20766,P29315,P36860,P82471,Q5BJY9               |
| 5887 | 1,5,6,26,2 2,3,4,7,8,2<br>8,29,31,32 5,27,30 | 2 O70417,P36860                                    |
| 5888 | 1,5,6,26,2 2,3,4,7,8,2<br>8,30,31,32 5,27,29 | 6 P22006,P36860,P62804,Q00715,Q4G075,Q8VD89        |
| 5889 | 1,5,6,26,2 2,3,4,7,8,2<br>9,30,31,32 5,27,28 | 5 O70417,P36860,P62804,Q4G075,Q5BJY9               |
| 5890 | 1,5,6,27,2 2,3,4,7,8,2<br>8,29,30,31 5,26,32 | 1 P05539                                           |
| 5891 | 1,5,6,27,2 2,3,4,7,8,2<br>8,29,30,32 5,26,31 | 3 P20766,P29315,Q5I0J9                             |
| 5892 | 1,5,6,27,2 2,3,4,7,8,2<br>8,29,31,32 5,26,30 | 3 O35547,O70417,P05539                             |
| 5893 | 1,5,6,27,2 2,3,4,7,8,2<br>8,30,31,32 5,26,29 | 3 P22006,P62804,Q8VD89                             |
| 5894 | 1,5,6,27,2 2,3,4,7,8,2<br>9,30,31,32 5,26,28 | 1 P36860                                           |

|      |                          |                         |   |                                                  |
|------|--------------------------|-------------------------|---|--------------------------------------------------|
| 5895 | 1,5,6,28,2<br>9,30,31,32 | 2,3,4,7,8,2<br>5,26,27  | 7 | O70417,P20761,P20762,P36860,Q4G075,Q5BJY9,Q9WTT6 |
| 5896 | 1,5,7,8,25,<br>26,27,28  | 2,3,4,6,29,<br>30,31,32 | 4 | O55145,P26342,P80299,Q9WTT6                      |
| 5897 | 1,5,7,8,25,<br>26,27,29  | 2,3,4,6,28,<br>30,31,32 | 5 | P06760,P22006,Q4G075,Q9QX74,Q9WTT6               |
| 5898 | 1,5,7,8,25,<br>26,27,30  | 2,3,4,6,28,<br>29,31,32 | 1 | P80299                                           |
| 5899 | 1,5,7,8,25,<br>26,27,31  | 2,3,4,6,28,<br>29,30,32 | 4 | O55145,P23739,Q9WTT6,Q9Z0V6                      |
| 5900 | 1,5,7,8,25,<br>26,27,32  | 2,3,4,6,28,<br>29,30,31 | 1 | P13432                                           |
| 5901 | 1,5,7,8,25,<br>26,28,29  | 2,3,4,6,27,<br>30,31,32 | 6 | P06760,P22006,P80299,Q6P6R2,Q9QX74,Q9WTT6        |
| 5902 | 1,5,7,8,25,<br>26,28,30  | 2,3,4,6,27,<br>29,31,32 | 2 | P35745,P80299                                    |
| 5903 | 1,5,7,8,25,<br>26,28,31  | 2,3,4,6,27,<br>29,30,32 | 5 | O55145,P00714,P35745,Q9WTT6,Q9Z0V6               |
| 5904 | 1,5,7,8,25,<br>26,28,32  | 2,3,4,6,27,<br>29,30,31 | 1 | P13432                                           |
| 5905 | 1,5,7,8,25,<br>26,29,30  | 2,3,4,6,27,<br>28,31,32 | 5 | P06760,P22006,P35745,P80299,Q9QX74               |
| 5906 | 1,5,7,8,25,<br>26,29,31  | 2,3,4,6,27,<br>28,30,32 | 2 | P06760,Q9QX74                                    |
| 5907 | 1,5,7,8,25,<br>26,29,32  | 2,3,4,6,27,<br>28,30,31 | 3 | P06760,P13432,Q9QX74                             |
| 5908 | 1,5,7,8,25,<br>26,30,31  | 2,3,4,6,27,<br>28,29,32 | 2 | P35745,Q9WVK7                                    |
| 5909 | 1,5,7,8,25,<br>26,30,32  | 2,3,4,6,27,<br>28,29,31 | 1 | Q9WVK7                                           |
| 5910 | 1,5,7,8,25,<br>26,31,32  | 2,3,4,6,27,<br>28,29,30 | 3 | P13432,Q80WL1,Q9WVK7                             |
| 5911 | 1,5,7,8,25,<br>27,28,29  | 2,3,4,6,26,<br>30,31,32 | 7 | P06760,P22006,Q4G075,Q812E4,Q99MH3,Q9WTT6,Q9WUC4 |
| 5912 | 1,5,7,8,25,<br>27,28,30  | 2,3,4,6,26,<br>29,31,32 | 0 |                                                  |
| 5913 | 1,5,7,8,25,<br>27,28,31  | 2,3,4,6,26,<br>29,30,32 | 2 | O55145,P23739                                    |
| 5914 | 1,5,7,8,25,<br>27,28,32  | 2,3,4,6,26,<br>29,30,31 | 2 | Q6AYR9,Q812E4                                    |

|      |                                              |                                                           |
|------|----------------------------------------------|-----------------------------------------------------------|
| 5915 | 1,5,7,8,25, 2,3,4,6,26,<br>27,29,30 28,31,32 | 5 P06760,P22006,Q4G075,Q6IMF3,Q6P6Q2                      |
| 5916 | 1,5,7,8,25, 2,3,4,6,26,<br>27,29,31 28,30,32 | 2 P06760,Q4G075                                           |
| 5917 | 1,5,7,8,25, 2,3,4,6,26,<br>27,29,32 28,30,31 | 1 P06760                                                  |
| 5918 | 1,5,7,8,25, 2,3,4,6,26,<br>27,30,31 28,29,32 | 3 P23739,Q6IG05,Q6IMF3                                    |
| 5919 | 1,5,7,8,25, 2,3,4,6,26,<br>27,30,32 28,29,31 | 0                                                         |
| 5920 | 1,5,7,8,25, 2,3,4,6,26,<br>27,31,32 28,29,30 | 2 P23739,Q80WL1                                           |
| 5921 | 1,5,7,8,25, 2,3,4,6,26,<br>28,29,30 27,31,32 | 2 P06760,P35745                                           |
| 5922 | 1,5,7,8,25, 2,3,4,6,26,<br>28,29,31 27,30,32 | 2 P06760,P35745                                           |
| 5923 | 1,5,7,8,25, 2,3,4,6,26,<br>28,29,32 27,30,31 | 3 P06760,P30120,Q812E4                                    |
| 5924 | 1,5,7,8,25, 2,3,4,6,26,<br>28,30,31 27,29,32 | 1 P35745                                                  |
| 5925 | 1,5,7,8,25, 2,3,4,6,26,<br>28,30,32 27,29,31 | 1 P35745                                                  |
| 5926 | 1,5,7,8,25, 2,3,4,6,26,<br>28,31,32 27,29,30 | 3 P21588,Q80WL1,Q811M5                                    |
| 5927 | 1,5,7,8,25, 2,3,4,6,26,<br>29,30,31 27,28,32 | 3 P35745,Q6IMF3,Q9WVK7                                    |
| 5928 | 1,5,7,8,25, 2,3,4,6,26,<br>29,30,32 27,28,31 | 2 Q6IMF3,Q9WVK7                                           |
| 5929 | 1,5,7,8,25, 2,3,4,6,26,<br>29,31,32 27,28,30 | 3 P21588,Q80WL1,Q9WVK7                                    |
| 5930 | 1,5,7,8,25, 2,3,4,6,26,<br>30,31,32 27,28,29 | 3 P09656,P35745,Q9WVK7                                    |
| 5931 | 1,5,7,8,26, 2,3,4,6,25,<br>27,28,29 30,31,32 | 8 P06760,P29315,P47967,Q4G075,Q6P6R2,Q812E4,Q9QX74,Q9WTT6 |
| 5932 | 1,5,7,8,26, 2,3,4,6,25,<br>27,28,30 29,31,32 | 3 P29315,P35745,Q9WTT6                                    |
| 5933 | 1,5,7,8,26, 2,3,4,6,25,<br>27,28,31 29,30,32 | 3 O55145,P35745,Q9WTT6                                    |
| 5934 | 1,5,7,8,26, 2,3,4,6,25,<br>27,28,32 29,30,31 | 4 P29315,Q6AYR9,Q9QWN8,Q9WTT6                             |



|      |                                              |                                                                          |
|------|----------------------------------------------|--------------------------------------------------------------------------|
| 5935 | 1,5,7,8,26, 2,3,4,6,25,<br>27,29,30 28,31,32 | 4 P06760,P29315,Q9QX74,Q9WTT6                                            |
| 5936 | 1,5,7,8,26, 2,3,4,6,25,<br>27,29,31 28,30,32 | 3 P06760,Q9QX74,Q9WTT6                                                   |
| 5937 | 1,5,7,8,26, 2,3,4,6,25,<br>27,29,32 28,30,31 | 3 P06760,P29315,Q9QX74                                                   |
| 5938 | 1,5,7,8,26, 2,3,4,6,25,<br>27,30,31 28,29,32 | 2 P23739,P35745                                                          |
| 5939 | 1,5,7,8,26, 2,3,4,6,25,<br>27,30,32 28,29,31 | 1 P29315                                                                 |
| 5940 | 1,5,7,8,26, 2,3,4,6,25,<br>27,31,32 28,29,30 | 1 P23739                                                                 |
| 5941 | 1,5,7,8,26, 2,3,4,6,25,<br>28,29,30 27,31,32 | 6 P06760,P21674,P29315,P35745,Q9QX74,Q9WTT6                              |
| 5942 | 1,5,7,8,26, 2,3,4,6,25,<br>28,29,31 27,30,32 | 6 P06760,P21674,P35745,Q6P6R2,Q9QX74,Q9WTT6                              |
| 5943 | 1,5,7,8,26, 2,3,4,6,25,<br>28,29,32 27,30,31 | 5 P06760,P29315,P30120,Q9QX74,Q9QYP1                                     |
| 5944 | 1,5,7,8,26, 2,3,4,6,25,<br>28,30,31 27,29,32 | 1 P35745                                                                 |
| 5945 | 1,5,7,8,26, 2,3,4,6,25,<br>28,30,32 27,29,31 | 2 P29315,P35745                                                          |
| 5946 | 1,5,7,8,26, 2,3,4,6,25,<br>28,31,32 27,29,30 | 1 P35745                                                                 |
| 5947 | 1,5,7,8,26, 2,3,4,6,25,<br>29,30,31 27,28,32 | 4 P06760,P35745,P49134,Q9QX74                                            |
| 5948 | 1,5,7,8,26, 2,3,4,6,25,<br>29,30,32 27,28,31 | 2 P29315,P35745                                                          |
| 5949 | 1,5,7,8,26, 2,3,4,6,25,<br>29,31,32 27,28,30 | 2 P06760,Q9QX74                                                          |
| 5950 | 1,5,7,8,26, 2,3,4,6,25,<br>30,31,32 27,28,29 | 3 B2RYW9,P35745,Q9WVK7                                                   |
| 5951 | 1,5,7,8,27, 2,3,4,6,25,<br>28,29,30 26,31,32 | 8 P06760,P19218,P29315,P35745,P47967,Q4G075,Q6IMF3,Q812E4                |
| 5952 | 1,5,7,8,27, 2,3,4,6,25,<br>28,29,31 26,30,32 | 4 D3ZUC6,P06760,Q06000,Q812E4                                            |
| 5953 | 1,5,7,8,27, 2,3,4,6,25,<br>28,29,32 26,30,31 | 10 O35547,P06760,P08010,P29315,P30120,P47727,P47967,Q6AYR9,Q812E4,Q9Z2L0 |
| 5954 | 1,5,7,8,27, 2,3,4,6,25,<br>28,30,31 26,29,32 | 3 P19218,P23739,P35745                                                   |

|      |                                              |                                             |
|------|----------------------------------------------|---------------------------------------------|
| 5955 | 1,5,7,8,27, 2,3,4,6,25,<br>28,30,32 26,29,31 | 3 P19218,P29315,P35745                      |
| 5956 | 1,5,7,8,27, 2,3,4,6,25,<br>28,31,32 26,29,30 | 2 P23739,Q80WL1                             |
| 5957 | 1,5,7,8,27, 2,3,4,6,25,<br>29,30,31 26,28,32 | 6 P06760,P08649,P35745,Q06000,Q6IMF3,Q6P6Q2 |
| 5958 | 1,5,7,8,27, 2,3,4,6,25,<br>29,30,32 26,28,31 | 3 P29315,Q6IMF3,Q6P6Q2                      |
| 5959 | 1,5,7,8,27, 2,3,4,6,25,<br>29,31,32 26,28,30 | 0                                           |
| 5960 | 1,5,7,8,27, 2,3,4,6,25,<br>30,31,32 26,28,29 | 4 P08649,P23739,P35745,Q6IMF3               |
| 5961 | 1,5,7,8,28, 2,3,4,6,25,<br>29,30,31 26,27,32 | 3 P21674,P35745,Q06000                      |
| 5962 | 1,5,7,8,28, 2,3,4,6,25,<br>29,30,32 26,27,31 | 2 P29315,P35745                             |
| 5963 | 1,5,7,8,28, 2,3,4,6,25,<br>29,31,32 26,27,30 | 2 P21588,P35745                             |
| 5964 | 1,5,7,8,28, 2,3,4,6,25,<br>30,31,32 26,27,29 | 1 P35745                                    |
| 5965 | 1,5,7,8,29, 2,3,4,6,25,<br>30,31,32 26,27,28 | 4 P08649,P35745,P36860,Q6IMF3               |
| 5966 | 1,5,7,25,2 2,3,4,6,8,3<br>6,27,28,29 0,31,32 | 5 P02625,P20646,P97615,Q63532,Q9WUC4        |
| 5967 | 1,5,7,25,2 2,3,4,6,8,2<br>6,27,28,30 9,31,32 | 0                                           |
| 5968 | 1,5,7,25,2 2,3,4,6,8,2<br>6,27,28,31 9,30,32 | 1 O55145                                    |
| 5969 | 1,5,7,25,2 2,3,4,6,8,2<br>6,27,28,32 9,30,31 | 1 Q5RJR2                                    |
| 5970 | 1,5,7,25,2 2,3,4,6,8,2<br>6,27,29,30 8,31,32 | 3 P22006,P36376,Q63532                      |
| 5971 | 1,5,7,25,2 2,3,4,6,8,2<br>6,27,29,31 8,30,32 | 0                                           |
| 5972 | 1,5,7,25,2 2,3,4,6,8,2<br>6,27,29,32 8,30,31 | 2 P36376,Q63532                             |
| 5973 | 1,5,7,25,2 2,3,4,6,8,2<br>6,27,30,31 8,29,32 | 0                                           |
| 5974 | 1,5,7,25,2 2,3,4,6,8,2<br>6,27,30,32 8,29,31 | 3 P36376,Q63532,Q9R168                      |

|      |                                              |                                                                  |
|------|----------------------------------------------|------------------------------------------------------------------|
| 5975 | 1,5,7,25,2 2,3,4,6,8,2<br>6,27,31,32 8,29,30 | 1 P23739                                                         |
| 5976 | 1,5,7,25,2 2,3,4,6,8,2<br>6,28,29,30 7,31,32 | 1 Q63532                                                         |
| 5977 | 1,5,7,25,2 2,3,4,6,8,2<br>6,28,29,31 7,30,32 | 1 Q01205                                                         |
| 5978 | 1,5,7,25,2 2,3,4,6,8,2<br>6,28,29,32 7,30,31 | 1 Q63532                                                         |
| 5979 | 1,5,7,25,2 2,3,4,6,8,2<br>6,28,30,31 7,29,32 | 2 P00714,P35745                                                  |
| 5980 | 1,5,7,25,2 2,3,4,6,8,2<br>6,28,30,32 7,29,31 | 3 Q5PQL7,Q62975,Q9R168                                           |
| 5981 | 1,5,7,25,2 2,3,4,6,8,2<br>6,28,31,32 7,29,30 | 0                                                                |
| 5982 | 1,5,7,25,2 2,3,4,6,8,2<br>6,29,30,31 7,28,32 | 2 Q9QWN8,Q9WVK7                                                  |
| 5983 | 1,5,7,25,2 2,3,4,6,8,2<br>6,29,30,32 7,28,31 | 5 P36376,Q5BJY9,Q63532,Q9R168,Q9WVK7                             |
| 5984 | 1,5,7,25,2 2,3,4,6,8,2<br>6,29,31,32 7,28,30 | 3 O70417,P19218,Q9WVK7                                           |
| 5985 | 1,5,7,25,2 2,3,4,6,8,2<br>6,30,31,32 7,28,29 | 3 P25809,Q00715,Q9WVK7                                           |
| 5986 | 1,5,7,25,2 2,3,4,6,8,2<br>7,28,29,30 6,31,32 | 3 Q05702,Q63532,Q99MH3                                           |
| 5987 | 1,5,7,25,2 2,3,4,6,8,2<br>7,28,29,31 6,30,32 | 2 P97615,Q99MH3                                                  |
| 5988 | 1,5,7,25,2 2,3,4,6,8,2<br>7,28,29,32 6,30,31 | 7 Q05702,Q62761;Q62762;Q62763,Q63532,Q6AY61,Q812E4,Q99MH3,Q9WUC4 |
| 5989 | 1,5,7,25,2 2,3,4,6,8,2<br>7,28,30,31 6,29,32 | 1 P23739                                                         |
| 5990 | 1,5,7,25,2 2,3,4,6,8,2<br>7,28,30,32 6,29,31 | 1 Q05702                                                         |
| 5991 | 1,5,7,25,2 2,3,4,6,8,2<br>7,28,31,32 6,29,30 | 1 P23739                                                         |
| 5992 | 1,5,7,25,2 2,3,4,6,8,2<br>7,29,30,31 6,28,32 | 2 O54728,P08649                                                  |
| 5993 | 1,5,7,25,2 2,3,4,6,8,2<br>7,29,30,32 6,28,31 | 3 P08649,P36376,Q63532                                           |
| 5994 | 1,5,7,25,2 2,3,4,6,8,2<br>7,29,31,32 6,28,30 | 1 P08649                                                         |

|      |                                              |                                                                  |
|------|----------------------------------------------|------------------------------------------------------------------|
| 5995 | 1,5,7,25,2 2,3,4,6,8,2<br>7,30,31,32 6,28,29 | 2 P08649,P23739                                                  |
| 5996 | 1,5,7,25,2 2,3,4,6,8,2<br>8,29,30,31 6,27,32 | 4 P08649,P17559,P35745,Q5BJY9                                    |
| 5997 | 1,5,7,25,2 2,3,4,6,8,2<br>8,29,30,32 6,27,31 | 4 P17559,Q5BJY9,Q63532,Q9R168                                    |
| 5998 | 1,5,7,25,2 2,3,4,6,8,2<br>8,29,31,32 6,27,30 | 3 P17559,P20762,Q5BJY9                                           |
| 5999 | 1,5,7,25,2 2,3,4,6,8,2<br>8,30,31,32 6,27,29 | 4 P17559,P25809,Q5BJY9,Q62975                                    |
| 6000 | 1,5,7,25,2 2,3,4,6,8,2<br>9,30,31,32 6,27,28 | 6 P08649,P17559,P20762,P36860,Q5BJY9,Q9WVK7                      |
| 6001 | 1,5,7,26,2 2,3,4,6,8,2<br>7,28,29,30 5,31,32 | 5 P29315,P36376,P47967,Q05702,Q63532                             |
| 6002 | 1,5,7,26,2 2,3,4,6,8,2<br>7,28,29,31 5,30,32 | 3 O70417,P02625,P97615                                           |
| 6003 | 1,5,7,26,2 2,3,4,6,8,2<br>7,28,29,32 5,30,31 | 7 P02625,P29315,P36376,P47967,Q62761;Q62762;Q62763,Q63532,Q812E4 |
| 6004 | 1,5,7,26,2 2,3,4,6,8,2<br>7,28,30,31 5,29,32 | 0                                                                |
| 6005 | 1,5,7,26,2 2,3,4,6,8,2<br>7,28,30,32 5,29,31 | 2 P29315,P36376                                                  |
| 6006 | 1,5,7,26,2 2,3,4,6,8,2<br>7,28,31,32 5,29,30 | 0                                                                |
| 6007 | 1,5,7,26,2 2,3,4,6,8,2<br>7,29,30,31 5,28,32 | 3 P02631,P08649,P36860                                           |
| 6008 | 1,5,7,26,2 2,3,4,6,8,2<br>7,29,30,32 5,28,31 | 4 P08649,P29315,P36376,Q63532                                    |
| 6009 | 1,5,7,26,2 2,3,4,6,8,2<br>7,29,31,32 5,28,30 | 2 O70417,P08649                                                  |
| 6010 | 1,5,7,26,2 2,3,4,6,8,2<br>7,30,31,32 5,28,29 | 2 P08649,P36860                                                  |
| 6011 | 1,5,7,26,2 2,3,4,6,8,2<br>8,29,30,31 5,27,32 | 3 P00762,P35745,P98166                                           |
| 6012 | 1,5,7,26,2 2,3,4,6,8,2<br>8,29,30,32 5,27,31 | 5 P17559,P29315,P36376,Q5BJY9,Q63532                             |
| 6013 | 1,5,7,26,2 2,3,4,6,8,2<br>8,29,31,32 5,27,30 | 2 O70417,P17559                                                  |
| 6014 | 1,5,7,26,2 2,3,4,6,8,2<br>8,30,31,32 5,27,29 | 1 P35745                                                         |

|      |                                              |                                                    |
|------|----------------------------------------------|----------------------------------------------------|
| 6015 | 1,5,7,26,2 2,3,4,6,8,2<br>9,30,31,32 5,27,28 | 6 O70417,P08649,P17559,P36860,Q5BJY9,Q9WVK7        |
| 6016 | 1,5,7,27,2 2,3,4,6,8,2<br>8,29,30,31 5,26,32 | 2 P08649,Q06000                                    |
| 6017 | 1,5,7,27,2 2,3,4,6,8,2<br>8,29,30,32 5,26,31 | 5 P08649,P29315,P36376,Q05702,Q63532               |
| 6018 | 1,5,7,27,2 2,3,4,6,8,2<br>8,29,31,32 5,26,30 | 4 O70417,P08649,Q62761;Q62762;Q62763,Q6AY61        |
| 6019 | 1,5,7,27,2 2,3,4,6,8,2<br>8,30,31,32 5,26,29 | 2 P08649,P23739                                    |
| 6020 | 1,5,7,27,2 2,3,4,6,8,2<br>9,30,31,32 5,26,28 | 3 P08649,P36860,Q99PP0                             |
| 6021 | 1,5,7,28,2 2,3,4,6,8,2<br>9,30,31,32 5,26,27 | 5 P08649,P17559,P35745,P36860,Q5BJY9               |
| 6022 | 1,5,8,25,2 2,3,4,6,7,3<br>6,27,28,29 0,31,32 | 7 P00714,P06760,P20766,P26342,P80299,P97615,Q6P6R2 |
| 6023 | 1,5,8,25,2 2,3,4,6,7,2<br>6,27,28,30 9,31,32 | 4 P00714,P20766,P26342,P80299                      |
| 6024 | 1,5,8,25,2 2,3,4,6,7,2<br>6,27,28,31 9,30,32 | 5 O55145,P00714,P23739,P26342,Q80WL1               |
| 6025 | 1,5,8,25,2 2,3,4,6,7,2<br>6,27,28,32 9,30,31 | 5 P20766,P26342,P80299,Q80WL1,Q9QWN8               |
| 6026 | 1,5,8,25,2 2,3,4,6,7,2<br>6,27,29,30 8,31,32 | 3 P20766,P22006,P80299                             |
| 6027 | 1,5,8,25,2 2,3,4,6,7,2<br>6,27,29,31 8,30,32 | 1 Q80WL1                                           |
| 6028 | 1,5,8,25,2 2,3,4,6,7,2<br>6,27,29,32 8,30,31 | 2 P13432,Q80WL1                                    |
| 6029 | 1,5,8,25,2 2,3,4,6,7,2<br>6,27,30,31 8,29,32 | 1 P23739                                           |
| 6030 | 1,5,8,25,2 2,3,4,6,7,2<br>6,27,30,32 8,29,31 | 1 P80299                                           |
| 6031 | 1,5,8,25,2 2,3,4,6,7,2<br>6,27,31,32 8,29,30 | 3 P13432,P23739,Q80WL1                             |
| 6032 | 1,5,8,25,2 2,3,4,6,7,2<br>6,28,29,30 7,31,32 | 3 P00714,P20766,P80299                             |
| 6033 | 1,5,8,25,2 2,3,4,6,7,2<br>6,28,29,31 7,30,32 | 2 P00714,Q80WL1                                    |
| 6034 | 1,5,8,25,2 2,3,4,6,7,2<br>6,28,29,32 7,30,31 | 4 P13432,P20766,P80299,Q80WL1                      |

|      |                                              |                               |
|------|----------------------------------------------|-------------------------------|
| 6035 | 1,5,8,25,2 2,3,4,6,7,2<br>6,28,30,31 7,29,32 | 3 P00714,P35745,P80299        |
| 6036 | 1,5,8,25,2 2,3,4,6,7,2<br>6,28,30,32 7,29,31 | 2 P20766,P80299               |
| 6037 | 1,5,8,25,2 2,3,4,6,7,2<br>6,28,31,32 7,29,30 | 1 Q80WL1                      |
| 6038 | 1,5,8,25,2 2,3,4,6,7,2<br>6,29,30,31 7,28,32 | 1 P11598                      |
| 6039 | 1,5,8,25,2 2,3,4,6,7,2<br>6,29,30,32 7,28,31 | 3 P00507,P20766,P80299        |
| 6040 | 1,5,8,25,2 2,3,4,6,7,2<br>6,29,31,32 7,28,30 | 3 P00507,P13432,Q80WL1        |
| 6041 | 1,5,8,25,2 2,3,4,6,7,2<br>6,30,31,32 7,28,29 | 4 P00507,Q00715,Q63617,Q9WVK7 |
| 6042 | 1,5,8,25,2 2,3,4,6,7,2<br>7,28,29,30 6,31,32 | 2 P20766,Q9WVH8               |
| 6043 | 1,5,8,25,2 2,3,4,6,7,2<br>7,28,29,31 6,30,32 | 2 P97615,Q80WL1               |
| 6044 | 1,5,8,25,2 2,3,4,6,7,2<br>7,28,29,32 6,30,31 | 4 P20766,Q6AYR9,Q80WL1,Q812E4 |
| 6045 | 1,5,8,25,2 2,3,4,6,7,2<br>7,28,30,31 6,29,32 | 1 P23739                      |
| 6046 | 1,5,8,25,2 2,3,4,6,7,2<br>7,28,30,32 6,29,31 | 1 P20766                      |
| 6047 | 1,5,8,25,2 2,3,4,6,7,2<br>7,28,31,32 6,29,30 | 2 P23739,Q80WL1               |
| 6048 | 1,5,8,25,2 2,3,4,6,7,2<br>7,29,30,31 6,28,32 | 2 P23739,Q6IMF3               |
| 6049 | 1,5,8,25,2 2,3,4,6,7,2<br>7,29,30,32 6,28,31 | 2 P20766,Q6IMF3               |
| 6050 | 1,5,8,25,2 2,3,4,6,7,2<br>7,29,31,32 6,28,30 | 2 P23739,Q80WL1               |
| 6051 | 1,5,8,25,2 2,3,4,6,7,2<br>7,30,31,32 6,28,29 | 1 P23739                      |
| 6052 | 1,5,8,25,2 2,3,4,6,7,2<br>8,29,30,31 6,27,32 | 1 P35745                      |
| 6053 | 1,5,8,25,2 2,3,4,6,7,2<br>8,29,30,32 6,27,31 | 2 P20766,Q62894               |
| 6054 | 1,5,8,25,2 2,3,4,6,7,2<br>8,29,31,32 6,27,30 | 2 P21588,Q80WL1               |

|      |                                              |                                             |
|------|----------------------------------------------|---------------------------------------------|
| 6055 | 1,5,8,25,2 2,3,4,6,7,2<br>8,30,31,32 6,27,29 | 2 P21588,Q80WL1                             |
| 6056 | 1,5,8,25,2 2,3,4,6,7,2<br>9,30,31,32 6,27,28 | 2 P21588,Q9WVK7                             |
| 6057 | 1,5,8,26,2 2,3,4,6,7,2<br>7,28,29,30 5,31,32 | 2 P20766,P29315                             |
| 6058 | 1,5,8,26,2 2,3,4,6,7,2<br>7,28,29,31 5,30,32 | 2 P26342,Q6P6R2                             |
| 6059 | 1,5,8,26,2 2,3,4,6,7,2<br>7,28,29,32 5,30,31 | 6 P08010,P20766,P29315,Q6AYR9,Q812E4,Q9QWN8 |
| 6060 | 1,5,8,26,2 2,3,4,6,7,2<br>7,28,30,31 5,29,32 | 2 P23739,P35745                             |
| 6061 | 1,5,8,26,2 2,3,4,6,7,2<br>7,28,30,32 5,29,31 | 4 B0LT89,P20766,P29315,Q9QWN8               |
| 6062 | 1,5,8,26,2 2,3,4,6,7,2<br>7,28,31,32 5,29,30 | 3 P23739,Q80WL1,Q9QWN8                      |
| 6063 | 1,5,8,26,2 2,3,4,6,7,2<br>7,29,30,31 5,28,32 | 0                                           |
| 6064 | 1,5,8,26,2 2,3,4,6,7,2<br>7,29,30,32 5,28,31 | 2 P20766,P29315                             |
| 6065 | 1,5,8,26,2 2,3,4,6,7,2<br>7,29,31,32 5,28,30 | 1 Q80WL1                                    |
| 6066 | 1,5,8,26,2 2,3,4,6,7,2<br>7,30,31,32 5,28,29 | 1 P23739                                    |
| 6067 | 1,5,8,26,2 2,3,4,6,7,2<br>8,29,30,31 5,27,32 | 1 P35745                                    |
| 6068 | 1,5,8,26,2 2,3,4,6,7,2<br>8,29,30,32 5,27,31 | 3 P20766,P29315,Q62894                      |
| 6069 | 1,5,8,26,2 2,3,4,6,7,2<br>8,29,31,32 5,27,30 | 1 Q80WL1                                    |
| 6070 | 1,5,8,26,2 2,3,4,6,7,2<br>8,30,31,32 5,27,29 | 1 P35745                                    |
| 6071 | 1,5,8,26,2 2,3,4,6,7,2<br>9,30,31,32 5,27,28 | 3 P36860,P63081,Q5QE79                      |
| 6072 | 1,5,8,27,2 2,3,4,6,7,2<br>8,29,30,31 5,26,32 | 1 Q9WVH8                                    |
| 6073 | 1,5,8,27,2 2,3,4,6,7,2<br>8,29,30,32 5,26,31 | 6 P18298,P20766,P29315,Q6AYR9,Q812E4,Q9WVH8 |
| 6074 | 1,5,8,27,2 2,3,4,6,7,2<br>8,29,31,32 5,26,30 | 3 Q6AYR9,Q80WL1,Q812E4                      |

|      |                               |                        |    |                                                                       |
|------|-------------------------------|------------------------|----|-----------------------------------------------------------------------|
| 6075 | 1,5,8,27,2<br>8,30,31,32      | 2,3,4,6,7,2<br>5,26,29 | 3  | B0LT89,P23739,Q9WVH8                                                  |
| 6076 | 1,5,8,27,2<br>9,30,31,32      | 2,3,4,6,7,2<br>5,26,28 | 3  | P08649,P23739,Q6IMF3                                                  |
| 6077 | 1,5,8,28,2<br>9,30,31,32      | 2,3,4,6,7,2<br>5,26,27 | 1  | P35745                                                                |
| 6078 | 1,5,25,26,<br>27,28,29,3<br>0 | 2,3,4,6,7,8<br>,31,32  | 6  | O55004,P00714,P20766,P82471,P97615,Q63532                             |
| 6079 | 1,5,25,26,<br>27,28,29,3<br>1 | 2,3,4,6,7,8<br>,30,32  | 6  | O70417,P00714,P02631,P35280,P97615,Q99041                             |
| 6080 | 1,5,25,26,<br>27,28,29,3<br>2 | 2,3,4,6,7,8<br>,30,31  | 6  | O70417,P20766,P82471,P97615,Q5RJR2,Q63532                             |
| 6081 | 1,5,25,26,<br>27,28,30,3<br>1 | 2,3,4,6,7,8<br>,29,32  | 5  | O55004,P00714,P02631,P20761,P42854                                    |
| 6082 | 1,5,25,26,<br>27,28,30,3<br>2 | 2,3,4,6,7,8<br>,29,31  | 4  | O70594,P20766,P82471,Q63532                                           |
| 6083 | 1,5,25,26,<br>27,28,31,3<br>2 | 2,3,4,6,7,8<br>,29,30  | 4  | O70417,P23739,P62804,Q80WL1                                           |
| 6084 | 1,5,25,26,<br>27,29,30,3<br>1 | 2,3,4,6,7,8<br>,28,32  | 7  | P02631,P11598,P22273,Q63617,Q99041,Q99PP0,Q9QZQ5                      |
| 6085 | 1,5,25,26,<br>27,29,30,3<br>2 | 2,3,4,6,7,8<br>,28,31  | 7  | P12020,P20766,P22273,P36376,P82471,Q63532,Q99PP0                      |
| 6086 | 1,5,25,26,<br>27,29,31,3<br>2 | 2,3,4,6,7,8<br>,28,30  | 6  | O70417,P02631,P22273,P62804,Q80WL1,Q99041                             |
| 6087 | 1,5,25,26,<br>27,30,31,3<br>2 | 2,3,4,6,7,8<br>,28,29  | 10 | P02631,P11598,P21674,P22273,P23739,P42854,P62804,Q00715,Q63617,Q99041 |
| 6088 | 1,5,25,26,<br>28,29,30,3<br>1 | 2,3,4,6,7,8<br>,27,32  | 10 | O70417,P00714,P02631,P20761,P22273,P22282,P50115,P98166,Q99041,Q9QZQ5 |



|      |                               |                       |    |                                                                                                                 |
|------|-------------------------------|-----------------------|----|-----------------------------------------------------------------------------------------------------------------|
| 6089 | 1,5,25,26,<br>28,29,30,3<br>2 | 2,3,4,6,7,8<br>,27,31 | 5  | P20766,P22273,P50115,Q62894,Q63532                                                                              |
| 6090 | 1,5,25,26,<br>28,29,31,3<br>2 | 2,3,4,6,7,8<br>,27,30 | 7  | O70417,P19218,P22273,P50115,P62804,Q80WL1,Q99041                                                                |
| 6091 | 1,5,25,26,<br>28,30,31,3<br>2 | 2,3,4,6,7,8<br>,27,29 | 8  | P20761,P22273,P25809,P50115,P62804,Q00715,Q4G075,Q99041                                                         |
| 6092 | 1,5,25,26,<br>29,30,31,3<br>2 | 2,3,4,6,7,8<br>,27,28 | 16 | O70417,P00507,P02631,P06761,P11598,P22273,P22282,P36860,P50115,P62804,Q00715,Q4G075,Q63617,Q99041,Q9QZQ5,Q9WVK7 |
| 6093 | 1,5,25,27,<br>28,29,30,3<br>1 | 2,3,4,6,7,8<br>,26,32 | 6  | O55004,P02631,P20761,P20762,P97615,Q99PP0                                                                       |
| 6094 | 1,5,25,27,<br>28,29,30,3<br>2 | 2,3,4,6,7,8<br>,26,31 | 5  | P20762,P20766,Q05702,Q63532,Q99PP0                                                                              |
| 6095 | 1,5,25,27,<br>28,29,31,3<br>2 | 2,3,4,6,7,8<br>,26,30 | 6  | O70417,P20761,P20762,P97615,Q80WL1,Q99041                                                                       |
| 6096 | 1,5,25,27,<br>28,30,31,3<br>2 | 2,3,4,6,7,8<br>,26,29 | 7  | O70594,P20761,P20762,P22273,P23739,P42854,P62804                                                                |
| 6097 | 1,5,25,27,<br>29,30,31,3<br>2 | 2,3,4,6,7,8<br>,26,28 | 8  | P02631,P07150,P08649,P11598,P20762,P22273,Q99041,Q99PP0                                                         |
| 6098 | 1,5,25,28,<br>29,30,31,3<br>2 | 2,3,4,6,7,8<br>,26,27 | 10 | O70417,P17559,P20761,P20762,P22273,P50115,P50116,Q5BJY9,Q62894,Q99041                                           |
| 6099 | 1,5,26,27,<br>28,29,30,3<br>1 | 2,3,4,6,7,8<br>,25,32 | 5  | O55004,O70417,P02631,Q99PP0,Q9QZQ5                                                                              |
| 6100 | 1,5,26,27,<br>28,29,30,3<br>2 | 2,3,4,6,7,8<br>,25,31 | 8  | O70417,P02631,P12020,P20766,P29315,P36376,Q63532,Q99PP0                                                         |
| 6101 | 1,5,26,27,<br>28,29,31,3<br>2 | 2,3,4,6,7,8<br>,25,30 | 2  | O70417,P02631                                                                                                   |

|      |                               |                         |    |                                                                       |
|------|-------------------------------|-------------------------|----|-----------------------------------------------------------------------|
| 6102 | 1,5,26,27,<br>28,30,31,3<br>2 | 2,3,4,6,7,8<br>,25,29   | 6  | O70417,P02631,P22273,P23739,P42854,P62804                             |
| 6103 | 1,5,26,27,<br>29,30,31,3<br>2 | 2,3,4,6,7,8<br>,25,28   | 7  | O70417,P02631,P08649,P22273,P36860,P62804,Q99PP0                      |
| 6104 | 1,5,26,28,<br>29,30,31,3<br>2 | 2,3,4,6,7,8<br>,25,27   | 10 | O70417,P02631,P17559,P22273,P36860,P50115,Q4G075,Q5BJY9,Q5QE79,Q9QZQ5 |
| 6105 | 1,5,27,28,<br>29,30,31,3<br>2 | 2,3,4,6,7,8<br>,25,26   | 8  | O70417,P02631,P08649,P20761,P20762,P50115,Q99PP0,Q9WVH8               |
| 6106 | 1,6,7,8,25,<br>26,27,28       | 2,3,4,5,29,<br>30,31,32 | 10 | P06911,P07150,P19629,P22283,P26342,P63081,P70549,Q63598,Q9QW07,Q9WTT6 |
| 6107 | 1,6,7,8,25,<br>26,27,29       | 2,3,4,5,28,<br>30,31,32 | 4  | P13432,P70549,Q9QX74,Q9WTT6                                           |
| 6108 | 1,6,7,8,25,<br>26,27,30       | 2,3,4,5,28,<br>29,31,32 | 0  |                                                                       |
| 6109 | 1,6,7,8,25,<br>26,27,31       | 2,3,4,5,28,<br>29,30,32 | 4  | P06911,P19629,P70549,Q62894                                           |
| 6110 | 1,6,7,8,25,<br>26,27,32       | 2,3,4,5,28,<br>29,30,31 | 3  | P13432,P19629,Q9JHB9                                                  |
| 6111 | 1,6,7,8,25,<br>26,28,29       | 2,3,4,5,27,<br>30,31,32 | 7  | P06911,P13432,P70549,Q6P6R2,Q9QW07,Q9QX74,Q9WTT6                      |
| 6112 | 1,6,7,8,25,<br>26,28,30       | 2,3,4,5,27,<br>29,31,32 | 5  | P06911,P35745,P80299,Q5PQL7,Q9QW07                                    |
| 6113 | 1,6,7,8,25,<br>26,28,31       | 2,3,4,5,27,<br>29,30,32 | 7  | P06911,P19629,P35745,P57113,P70549,Q63598,Q9QW07                      |
| 6114 | 1,6,7,8,25,<br>26,28,32       | 2,3,4,5,27,<br>29,30,31 | 5  | P08723,P13432,P19629,Q5PQL7,Q9QW07                                    |
| 6115 | 1,6,7,8,25,<br>26,29,30       | 2,3,4,5,27,<br>28,31,32 | 0  |                                                                       |
| 6116 | 1,6,7,8,25,<br>26,29,31       | 2,3,4,5,27,<br>28,30,32 | 3  | P13432,P70549,Q9QX74                                                  |
| 6117 | 1,6,7,8,25,<br>26,29,32       | 2,3,4,5,27,<br>28,30,31 | 2  | P13432,P70549                                                         |
| 6118 | 1,6,7,8,25,<br>26,30,31       | 2,3,4,5,27,<br>28,29,32 | 2  | P35745,Q9WVK7                                                         |
| 6119 | 1,6,7,8,25,<br>26,30,32       | 2,3,4,5,27,<br>28,29,31 | 3  | P13432,Q5PQL7,Q9WVK7                                                  |

|      |                                              |                                                                                                                                             |
|------|----------------------------------------------|---------------------------------------------------------------------------------------------------------------------------------------------|
| 6120 | 1,6,7,8,25, 2,3,4,5,27,<br>26,31,32 28,29,30 | 3 P13432,P57113,Q9WVK7                                                                                                                      |
| 6121 | 1,6,7,8,25, 2,3,4,5,26,<br>27,28,29 30,31,32 | 19 P05539,P06761,P06911,P0C0A9,P19629,P22283,P47727,P63081,P70549,Q4G075,Q5GRG2,Q63<br>617,Q6AYR9,Q812E4,Q9JI85,Q9QW07,Q9WTT6,Q9WUC4,Q9Z2L0 |
| 6122 | 1,6,7,8,25, 2,3,4,5,26,<br>27,28,30 29,31,32 | 3 P06911,P19629,Q9QW07                                                                                                                      |
| 6123 | 1,6,7,8,25, 2,3,4,5,26,<br>27,28,31 29,30,32 | 4 P06911,P19629,Q5GRG2,Q9QW07                                                                                                               |
| 6124 | 1,6,7,8,25, 2,3,4,5,26,<br>27,28,32 29,30,31 | 10 P06911,P08723,P0C0A9,P19629,P22283,Q6AYR9,Q812E4,Q9JHB9,Q9JI85,Q9QW07                                                                    |
| 6125 | 1,6,7,8,25, 2,3,4,5,26,<br>27,29,30 28,31,32 | 0                                                                                                                                           |
| 6126 | 1,6,7,8,25, 2,3,4,5,26,<br>27,29,31 28,30,32 | 2 P06911,P70549                                                                                                                             |
| 6127 | 1,6,7,8,25, 2,3,4,5,26,<br>27,29,32 28,30,31 | 1 P13432                                                                                                                                    |
| 6128 | 1,6,7,8,25, 2,3,4,5,26,<br>27,30,31 28,29,32 | 1 P06911                                                                                                                                    |
| 6129 | 1,6,7,8,25, 2,3,4,5,26,<br>27,30,32 28,29,31 | 1 Q9JHB9                                                                                                                                    |
| 6130 | 1,6,7,8,25, 2,3,4,5,26,<br>27,31,32 28,29,30 | 2 P13432,P19629                                                                                                                             |
| 6131 | 1,6,7,8,25, 2,3,4,5,26,<br>28,29,30 27,31,32 | 3 P06911,P35745,Q9QW07                                                                                                                      |
| 6132 | 1,6,7,8,25, 2,3,4,5,26,<br>28,29,31 27,30,32 | 7 P06911,P12020,P21674,P35745,P70549,Q5GRG2,Q9QW07                                                                                          |
| 6133 | 1,6,7,8,25, 2,3,4,5,26,<br>28,29,32 27,30,31 | 12 P06911,P08723,P13432,P22283,P24368,P30120,P47727,Q63617,Q812E4,Q9JI85,Q9QW07,Q9Z2<br>L0                                                  |
| 6134 | 1,6,7,8,25, 2,3,4,5,26,<br>28,30,31 27,29,32 | 4 P06911,P35745,Q5GRG2,Q9QW07                                                                                                               |
| 6135 | 1,6,7,8,25, 2,3,4,5,26,<br>28,30,32 27,29,31 | 4 P06911,P35745,Q5PQL7,Q9QW07                                                                                                               |
| 6136 | 1,6,7,8,25, 2,3,4,5,26,<br>28,31,32 27,29,30 | 6 P06911,P08723,P19629,P21588,Q5GRG2,Q9QW07                                                                                                 |
| 6137 | 1,6,7,8,25, 2,3,4,5,26,<br>29,30,31 27,28,32 | 2 P06911,P35745                                                                                                                             |
| 6138 | 1,6,7,8,25, 2,3,4,5,26,<br>29,30,32 27,28,31 | 0                                                                                                                                           |
| 6139 | 1,6,7,8,25, 2,3,4,5,26,<br>29,31,32 27,28,30 | 3 P13432,P21588,P70549                                                                                                                      |

|      |                                              |                                                                                                                    |
|------|----------------------------------------------|--------------------------------------------------------------------------------------------------------------------|
| 6140 | 1,6,7,8,25, 2,3,4,5,26,<br>30,31,32 27,28,29 | 3 P35745,P47967,Q9WVK7                                                                                             |
| 6141 | 1,6,7,8,26, 2,3,4,5,25,<br>27,28,29 30,31,32 | 16 P02782,P06761,P21674,P22283,P29315,P47727,P70549,Q63617,Q6AYR9,Q6P6R2,Q812E4,Q9JI85,Q9QW07,Q9QX74,Q9WTT6,Q9Z2L0 |
| 6142 | 1,6,7,8,26, 2,3,4,5,25,<br>27,28,30 29,31,32 | 5 P07150,P29315,P35745,Q9QW07,Q9WTT6                                                                               |
| 6143 | 1,6,7,8,26, 2,3,4,5,25,<br>27,28,31 29,30,32 | 6 iRT-Kit_WR_fusion,P07150,P70549,Q63598,Q9QW07,Q9WTT6                                                             |
| 6144 | 1,6,7,8,26, 2,3,4,5,25,<br>27,28,32 29,30,31 | 11 P07150,P08723,P22282,P22283,P29315,Q63617,Q6AYR9,Q812E4,Q9JI85,Q9QW07,Q9QWN8                                    |
| 6145 | 1,6,7,8,26, 2,3,4,5,25,<br>27,29,30 28,31,32 | 3 P29315,Q811M5,Q9QX74                                                                                             |
| 6146 | 1,6,7,8,26, 2,3,4,5,25,<br>27,29,31 28,30,32 | 3 P70549,Q63474,Q9QX74                                                                                             |
| 6147 | 1,6,7,8,26, 2,3,4,5,25,<br>27,29,32 28,30,31 | 3 P13432,P29315,P70549                                                                                             |
| 6148 | 1,6,7,8,26, 2,3,4,5,25,<br>27,30,31 28,29,32 | 1 P35745                                                                                                           |
| 6149 | 1,6,7,8,26, 2,3,4,5,25,<br>27,30,32 28,29,31 | 1 P29315                                                                                                           |
| 6150 | 1,6,7,8,26, 2,3,4,5,25,<br>27,31,32 28,29,30 | 0                                                                                                                  |
| 6151 | 1,6,7,8,26, 2,3,4,5,25,<br>28,29,30 27,31,32 | 4 P21674,P29315,P35745,Q9QW07                                                                                      |
| 6152 | 1,6,7,8,26, 2,3,4,5,25,<br>28,29,31 27,30,32 | 8 P21674,P35745,P70549,Q63474,Q63617,Q6P6R2,Q9QW07,Q9QX74                                                          |
| 6153 | 1,6,7,8,26, 2,3,4,5,25,<br>28,29,32 27,30,31 | 10 P08723,P21674,P22283,P29315,P30120,P70549,Q63617,Q812E4,Q9JI85,Q9QW07                                           |
| 6154 | 1,6,7,8,26, 2,3,4,5,25,<br>28,30,31 27,29,32 | 1 P35745                                                                                                           |
| 6155 | 1,6,7,8,26, 2,3,4,5,25,<br>28,30,32 27,29,31 | 4 O89117,P29315,P35745,Q9QW07                                                                                      |
| 6156 | 1,6,7,8,26, 2,3,4,5,25,<br>28,31,32 27,29,30 | 8 O89117,P08723,P22006,P35745,P57113,P70549,Q6IG02,Q9QW07                                                          |
| 6157 | 1,6,7,8,26, 2,3,4,5,25,<br>29,30,31 27,28,32 | 3 P35745,Q63474,Q9QX74                                                                                             |
| 6158 | 1,6,7,8,26, 2,3,4,5,25,<br>29,30,32 27,28,31 | 2 P29315,P35745                                                                                                    |
| 6159 | 1,6,7,8,26, 2,3,4,5,25,<br>29,31,32 27,28,30 | 4 P13432,P57113,P70549,Q63474                                                                                      |

|      |                                              |                                                                                                                                         |
|------|----------------------------------------------|-----------------------------------------------------------------------------------------------------------------------------------------|
| 6160 | 1,6,7,8,26, 2,3,4,5,25,<br>30,31,32 27,28,29 | 5 B2RYW9,O89117,P35745,P57113,Q9WVK7                                                                                                    |
| 6161 | 1,6,7,8,27, 2,3,4,5,25,<br>28,29,30 26,31,32 | 11 P19218,P21674,P22283,P29315,P35745,P47727,Q63617,Q6AYR9,Q812E4,Q9QW07,Q9Z2L0                                                         |
| 6162 | 1,6,7,8,27, 2,3,4,5,25,<br>28,29,31 26,30,32 | 12 P05539,P21674,P22283,P47727,P70549,P97523,Q5GRG2,Q63474,Q63493,Q63617,Q812E4,Q9QW07                                                  |
| 6163 | 1,6,7,8,27, 2,3,4,5,25,<br>28,29,32 26,30,31 | 19 O35547,P00758,P04905,P06761,P08723,P18298,P22282,P22283,P29315,P30120,P47727,Q63493,Q63617,Q6AYR9,Q812E4,Q8CFN2,Q9JI85,Q9QW07,Q9Z2L0 |
| 6164 | 1,6,7,8,27, 2,3,4,5,25,<br>28,30,31 26,29,32 | 2 P19218,P35745                                                                                                                         |
| 6165 | 1,6,7,8,27, 2,3,4,5,25,<br>28,30,32 26,29,31 | 9 B0LT89,P08723,P19218,P29315,Q6AYR9,Q6P6S4,Q812E4,Q8VD89,Q9QW07                                                                        |
| 6166 | 1,6,7,8,27, 2,3,4,5,25,<br>28,31,32 26,29,30 | 9 P08723,P22006,P22283,Q63617,Q6AYR9,Q812E4,Q9JI85,Q9QW07,Q9QZK9                                                                        |
| 6167 | 1,6,7,8,27, 2,3,4,5,25,<br>29,30,31 26,28,32 | 2 P35745,Q63474                                                                                                                         |
| 6168 | 1,6,7,8,27, 2,3,4,5,25,<br>29,30,32 26,28,31 | 1 P29315                                                                                                                                |
| 6169 | 1,6,7,8,27, 2,3,4,5,25,<br>29,31,32 26,28,30 | 1 Q63474                                                                                                                                |
| 6170 | 1,6,7,8,27, 2,3,4,5,25,<br>30,31,32 26,28,29 | 2 P22006,Q9QZK9                                                                                                                         |
| 6171 | 1,6,7,8,28, 2,3,4,5,25,<br>29,30,31 26,27,32 | 4 P21674,P35745,Q63474,Q9QW07                                                                                                           |
| 6172 | 1,6,7,8,28, 2,3,4,5,25,<br>29,30,32 26,27,31 | 8 P08723,P21674,P29315,P30120,P35745,Q63617,Q812E4,Q9QW07                                                                               |
| 6173 | 1,6,7,8,28, 2,3,4,5,25,<br>29,31,32 26,27,30 | 11 P08723,P21588,P21674,P30120,P35745,P70549,Q63474,Q63493,Q63617,Q812E4,Q9QW07                                                         |
| 6174 | 1,6,7,8,28, 2,3,4,5,25,<br>30,31,32 26,27,29 | 4 O89117,P22006,P35745,Q9QZK9                                                                                                           |
| 6175 | 1,6,7,8,29, 2,3,4,5,25,<br>30,31,32 26,27,28 | 3 P35745,P36860,Q63474                                                                                                                  |
| 6176 | 1,6,7,25,2 2,3,4,5,8,3<br>6,27,28,29 0,31,32 | 7 P05539,P22283,P36376,P63081,P70549,Q9QW07,Q9WUC4                                                                                      |
| 6177 | 1,6,7,25,2 2,3,4,5,8,2<br>6,27,28,30 9,31,32 | 0                                                                                                                                       |
| 6178 | 1,6,7,25,2 2,3,4,5,8,2<br>6,27,28,31 9,30,32 | 4 O88797,P70549,Q63598,Q6IFU7                                                                                                           |
| 6179 | 1,6,7,25,2 2,3,4,5,8,2<br>6,27,28,32 9,30,31 | 3 P36376,Q5RJR2,Q6IG02                                                                                                                  |

|      |                                              |                                                                                                                           |
|------|----------------------------------------------|---------------------------------------------------------------------------------------------------------------------------|
| 6180 | 1,6,7,25,2 2,3,4,5,8,2<br>6,27,29,30 8,31,32 | 3 P05539,P36376,Q811M5                                                                                                    |
| 6181 | 1,6,7,25,2 2,3,4,5,8,2<br>6,27,29,31 8,30,32 | 2 P05539,P70549                                                                                                           |
| 6182 | 1,6,7,25,2 2,3,4,5,8,2<br>6,27,29,32 8,30,31 | 4 P05539,P36376,P70549,Q6AYR8                                                                                             |
| 6183 | 1,6,7,25,2 2,3,4,5,8,2<br>6,27,30,31 8,29,32 | 0                                                                                                                         |
| 6184 | 1,6,7,25,2 2,3,4,5,8,2<br>6,27,30,32 8,29,31 | 2 P36376,Q9R168                                                                                                           |
| 6185 | 1,6,7,25,2 2,3,4,5,8,2<br>6,27,31,32 8,29,30 | 1 Q6IFU7                                                                                                                  |
| 6186 | 1,6,7,25,2 2,3,4,5,8,2<br>6,28,29,30 7,31,32 | 2 P05539,P36376                                                                                                           |
| 6187 | 1,6,7,25,2 2,3,4,5,8,2<br>6,28,29,31 7,30,32 | 4 P05539,P70549,Q01205,Q6IFU7                                                                                             |
| 6188 | 1,6,7,25,2 2,3,4,5,8,2<br>6,28,29,32 7,30,31 | 6 P00731,P05539,P36376,P70549,Q6AYR8,Q9QW07                                                                               |
| 6189 | 1,6,7,25,2 2,3,4,5,8,2<br>6,28,30,31 7,29,32 | 1 P35745                                                                                                                  |
| 6190 | 1,6,7,25,2 2,3,4,5,8,2<br>6,28,30,32 7,29,31 | 5 P00731,P36376,Q5PQL7,Q62975,Q9R168                                                                                      |
| 6191 | 1,6,7,25,2 2,3,4,5,8,2<br>6,28,31,32 7,29,30 | 7 P00731,P22006,P70549,Q10758,Q6IFU7,Q6IFU8,Q6IG02                                                                        |
| 6192 | 1,6,7,25,2 2,3,4,5,8,2<br>6,29,30,31 7,28,32 | 2 P01835,Q9WVK7                                                                                                           |
| 6193 | 1,6,7,25,2 2,3,4,5,8,2<br>6,29,30,32 7,28,31 | 4 P01835,P36376,Q9R168,Q9WVK7                                                                                             |
| 6194 | 1,6,7,25,2 2,3,4,5,8,2<br>6,29,31,32 7,28,30 | 5 P19218,P70549,Q10758,Q6IFU7,Q9WVK7                                                                                      |
| 6195 | 1,6,7,25,2 2,3,4,5,8,2<br>6,30,31,32 7,28,29 | 6 B2RYW9,P08721,P25809,P47967,Q00715,Q9WVK7                                                                               |
| 6196 | 1,6,7,25,2 2,3,4,5,8,2<br>7,28,29,30 6,31,32 | 1 P05539                                                                                                                  |
| 6197 | 1,6,7,25,2 2,3,4,5,8,2<br>7,28,29,31 6,30,32 | 3 O88797,P05539,P70549                                                                                                    |
| 6198 | 1,6,7,25,2 2,3,4,5,8,2<br>7,28,29,32 6,30,31 | 15 O35547,P00758,P05539,P0C0A9,P22283,P36376,Q5RJR2,Q62761;Q62762;Q62763,Q6AYR8,Q6AYR9,Q812E4,Q8CGS4,Q9QW07,Q9WUC4,Q9Z2L0 |
| 6199 | 1,6,7,25,2 2,3,4,5,8,2<br>7,28,30,31 6,29,32 | 0                                                                                                                         |

|      |                                              |                                                                          |
|------|----------------------------------------------|--------------------------------------------------------------------------|
| 6200 | 1,6,7,25,2 2,3,4,5,8,2<br>7,28,30,32 6,29,31 | 1 Q5RJR2                                                                 |
| 6201 | 1,6,7,25,2 2,3,4,5,8,2<br>7,28,31,32 6,29,30 | 4 O88797,P19629,P22006,Q5RJR2                                            |
| 6202 | 1,6,7,25,2 2,3,4,5,8,2<br>7,29,30,31 6,28,32 | 2 O54728,P05539                                                          |
| 6203 | 1,6,7,25,2 2,3,4,5,8,2<br>7,29,30,32 6,28,31 | 3 P05539,P36376,Q5RLM2                                                   |
| 6204 | 1,6,7,25,2 2,3,4,5,8,2<br>7,29,31,32 6,28,30 | 2 P05539,P20762                                                          |
| 6205 | 1,6,7,25,2 2,3,4,5,8,2<br>7,30,31,32 6,28,29 | 0                                                                        |
| 6206 | 1,6,7,25,2 2,3,4,5,8,2<br>8,29,30,31 6,27,32 | 2 P05539,Q5BJY9                                                          |
| 6207 | 1,6,7,25,2 2,3,4,5,8,2<br>8,29,30,32 6,27,31 | 6 P01835,P05539,P36376,Q5BJY9,Q62975,Q9R168                              |
| 6208 | 1,6,7,25,2 2,3,4,5,8,2<br>8,29,31,32 6,27,30 | 4 P05539,P20762,P70549,Q5BJY9                                            |
| 6209 | 1,6,7,25,2 2,3,4,5,8,2<br>8,30,31,32 6,27,29 | 4 P22006,P25809,Q5BJY9,Q62975                                            |
| 6210 | 1,6,7,25,2 2,3,4,5,8,2<br>9,30,31,32 6,27,28 | 6 P01835,P20762,P25809,P36860,Q5BJY9,Q9WVK7                              |
| 6211 | 1,6,7,26,2 2,3,4,5,8,2<br>7,28,29,30 5,31,32 | 5 P01835,P05539,P29315,P36376,Q811M5                                     |
| 6212 | 1,6,7,26,2 2,3,4,5,8,2<br>7,28,29,31 5,30,32 | 6 O88797,P01835,P02625,P05539,P70549,Q63474                              |
| 6213 | 1,6,7,26,2 2,3,4,5,8,2<br>7,28,29,32 5,30,31 | 10 O35547,P00758,P01835,P05539,P22283,P29315,P36376,P70549,Q6AYR9,Q812E4 |
| 6214 | 1,6,7,26,2 2,3,4,5,8,2<br>7,28,30,31 5,29,32 | 0                                                                        |
| 6215 | 1,6,7,26,2 2,3,4,5,8,2<br>7,28,30,32 5,29,31 | 3 P29315,P36376,Q8VD89                                                   |
| 6216 | 1,6,7,26,2 2,3,4,5,8,2<br>7,28,31,32 5,29,30 | 4 O88797,P22006,Q6IFU7,Q6IG02                                            |
| 6217 | 1,6,7,26,2 2,3,4,5,8,2<br>7,29,30,31 5,28,32 | 5 P01835,P05539,P36376,P36860,Q811M5                                     |
| 6218 | 1,6,7,26,2 2,3,4,5,8,2<br>7,29,30,32 5,28,31 | 4 P01835,P29315,P36376,Q811M5                                            |
| 6219 | 1,6,7,26,2 2,3,4,5,8,2<br>7,29,31,32 5,28,30 | 5 P01835,P05539,P36376,P70549,Q63474                                     |

|      |                                              |                                                                  |
|------|----------------------------------------------|------------------------------------------------------------------|
| 6220 | 1,6,7,26,2 2,3,4,5,8,2<br>7,30,31,32 5,28,29 | 3 P22006,P36376,P36860                                           |
| 6221 | 1,6,7,26,2 2,3,4,5,8,2<br>8,29,30,31 5,27,32 | 6 P00762,P01835,P05539,P35745,Q63474,Q6DGG1                      |
| 6222 | 1,6,7,26,2 2,3,4,5,8,2<br>8,29,30,32 5,27,31 | 4 P01835,P29315,P36376,Q9R168                                    |
| 6223 | 1,6,7,26,2 2,3,4,5,8,2<br>8,29,31,32 5,27,30 | 8 P01835,P05539,P22006,P70549,Q63474,Q6IFU7,Q6IFU8,Q6IG02        |
| 6224 | 1,6,7,26,2 2,3,4,5,8,2<br>8,30,31,32 5,27,29 | 4 O89117,P01835,P22006,P35745                                    |
| 6225 | 1,6,7,26,2 2,3,4,5,8,2<br>9,30,31,32 5,27,28 | 4 P01835,P36376,P36860,Q63474                                    |
| 6226 | 1,6,7,27,2 2,3,4,5,8,2<br>8,29,30,31 5,26,32 | 3 P01835,P05539,Q63474                                           |
| 6227 | 1,6,7,27,2 2,3,4,5,8,2<br>8,29,30,32 5,26,31 | 9 O35547,P00758,P01835,P05539,P22283,P29315,P36376,Q6AYR9,Q812E4 |
| 6228 | 1,6,7,27,2 2,3,4,5,8,2<br>8,29,31,32 5,26,30 | 9 O35547,O88797,P01835,P05539,P22006,P22283,Q63474,Q6AYR9,Q812E4 |
| 6229 | 1,6,7,27,2 2,3,4,5,8,2<br>8,30,31,32 5,26,29 | 2 P22006,Q8VD89                                                  |
| 6230 | 1,6,7,27,2 2,3,4,5,8,2<br>9,30,31,32 5,26,28 | 3 P01835,P36376,P36860                                           |
| 6231 | 1,6,7,28,2 2,3,4,5,8,2<br>9,30,31,32 5,26,27 | 5 P01835,P22006,P36860,Q5BJY9,Q63474                             |
| 6232 | 1,6,8,25,2 2,3,4,5,7,3<br>6,27,28,29 0,31,32 | 7 P26342,P47727,P70549,Q6AYR9,Q6P6R2,Q812E4,Q9QW07               |
| 6233 | 1,6,8,25,2 2,3,4,5,7,2<br>6,27,28,30 9,31,32 | 4 P15399,P26342,P80299,Q9QW07                                    |
| 6234 | 1,6,8,25,2 2,3,4,5,7,2<br>6,27,28,31 9,30,32 | 3 P19629,P26342,P70549                                           |
| 6235 | 1,6,8,25,2 2,3,4,5,7,2<br>6,27,28,32 9,30,31 | 6 P13432,P15399,P19629,Q6AYR9,Q9QW07,Q9QWN8                      |
| 6236 | 1,6,8,25,2 2,3,4,5,7,2<br>6,27,29,30 8,31,32 | 1 Q811M5                                                         |
| 6237 | 1,6,8,25,2 2,3,4,5,7,2<br>6,27,29,31 8,30,32 | 2 P13432,P70549                                                  |
| 6238 | 1,6,8,25,2 2,3,4,5,7,2<br>6,27,29,32 8,30,31 | 2 P13432,P70549                                                  |
| 6239 | 1,6,8,25,2 2,3,4,5,7,2<br>6,27,30,31 8,29,32 | 4 P47967,P54921,P97840,Q6AY61                                    |



|      |                                              |                                                                                                          |
|------|----------------------------------------------|----------------------------------------------------------------------------------------------------------|
| 6240 | 1,6,8,25,2 2,3,4,5,7,2<br>6,27,30,32 8,29,31 | 3 P13432,P15399,P54921                                                                                   |
| 6241 | 1,6,8,25,2 2,3,4,5,7,2<br>6,27,31,32 8,29,30 | 4 P13432,P47967,P54921,P97840                                                                            |
| 6242 | 1,6,8,25,2 2,3,4,5,7,2<br>6,28,29,30 7,31,32 | 3 P20766,P80299,Q9QW07                                                                                   |
| 6243 | 1,6,8,25,2 2,3,4,5,7,2<br>6,28,29,31 7,30,32 | 2 P70549,Q63474                                                                                          |
| 6244 | 1,6,8,25,2 2,3,4,5,7,2<br>6,28,29,32 7,30,31 | 5 P13432,P20766,P30120,P70549,Q9QW07                                                                     |
| 6245 | 1,6,8,25,2 2,3,4,5,7,2<br>6,28,30,31 7,29,32 | 1 P35745                                                                                                 |
| 6246 | 1,6,8,25,2 2,3,4,5,7,2<br>6,28,30,32 7,29,31 | 4 P80299,Q5PQL7,Q68G31,Q9QW07                                                                            |
| 6247 | 1,6,8,25,2 2,3,4,5,7,2<br>6,28,31,32 7,29,30 | 4 P00731,P13432,P47967,P70549                                                                            |
| 6248 | 1,6,8,25,2 2,3,4,5,7,2<br>6,29,30,31 7,28,32 | 2 P47967,P97840                                                                                          |
| 6249 | 1,6,8,25,2 2,3,4,5,7,2<br>6,29,30,32 7,28,31 | 3 P00507,P13432,Q68G31                                                                                   |
| 6250 | 1,6,8,25,2 2,3,4,5,7,2<br>6,29,31,32 7,28,30 | 5 P00507,P13432,P47967,P70549,P97840                                                                     |
| 6251 | 1,6,8,25,2 2,3,4,5,7,2<br>6,30,31,32 7,28,29 | 9 P00507,P13432,P47967,P54921,P70712,P97840,Q00715,Q5I0D1,Q9WVK7                                         |
| 6252 | 1,6,8,25,2 2,3,4,5,7,2<br>7,28,29,30 6,31,32 | 3 P20766,Q812E4,Q9QW07                                                                                   |
| 6253 | 1,6,8,25,2 2,3,4,5,7,2<br>7,28,29,31 6,30,32 | 5 P05539,P19629,P70549,Q5GRG2,Q812E4                                                                     |
| 6254 | 1,6,8,25,2 2,3,4,5,7,2<br>7,28,29,32 6,30,31 | 14 O35547,P00758,P08723,P13432,P19629,P20766,P30120,P47727,Q6AYR9,Q812E4,Q8CFN2,Q9JI<br>85,Q9QW07,Q9Z2L0 |
| 6255 | 1,6,8,25,2 2,3,4,5,7,2<br>7,28,30,31 6,29,32 | 1 P19629                                                                                                 |
| 6256 | 1,6,8,25,2 2,3,4,5,7,2<br>7,28,30,32 6,29,31 | 5 B0LT89,P19629,P20766,Q6AYR9,Q9QW07                                                                     |
| 6257 | 1,6,8,25,2 2,3,4,5,7,2<br>7,28,31,32 6,29,30 | 4 P19629,Q6AYR9,Q80WL1,Q9WUW8                                                                            |
| 6258 | 1,6,8,25,2 2,3,4,5,7,2<br>7,29,30,31 6,28,32 | 1 P97840                                                                                                 |
| 6259 | 1,6,8,25,2 2,3,4,5,7,2<br>7,29,30,32 6,28,31 | 1 Q5RLM2                                                                                                 |

|      |                                              |                                                                                                                 |
|------|----------------------------------------------|-----------------------------------------------------------------------------------------------------------------|
| 6260 | 1,6,8,25,2 2,3,4,5,7,2<br>7,29,31,32 6,28,30 | 3 P13432,P97840,Q80WL1                                                                                          |
| 6261 | 1,6,8,25,2 2,3,4,5,7,2<br>7,30,31,32 6,28,29 | 3 P47967,P54921,P97840                                                                                          |
| 6262 | 1,6,8,25,2 2,3,4,5,7,2<br>8,29,30,31 6,27,32 | 1 P35745                                                                                                        |
| 6263 | 1,6,8,25,2 2,3,4,5,7,2<br>8,29,30,32 6,27,31 | 3 P20766,Q68G31,Q9QW07                                                                                          |
| 6264 | 1,6,8,25,2 2,3,4,5,7,2<br>8,29,31,32 6,27,30 | 6 P13432,P21588,P30120,P70549,Q63474,Q80WL1                                                                     |
| 6265 | 1,6,8,25,2 2,3,4,5,7,2<br>8,30,31,32 6,27,29 | 3 P21588,P22006,P47967                                                                                          |
| 6266 | 1,6,8,25,2 2,3,4,5,7,2<br>9,30,31,32 6,27,28 | 4 P21588,P47967,P97840,Q5RLM2                                                                                   |
| 6267 | 1,6,8,26,2 2,3,4,5,7,2<br>7,28,29,30 5,31,32 | 5 P15399,P29315,Q6P6R2,Q811M5,Q9QW07                                                                            |
| 6268 | 1,6,8,26,2 2,3,4,5,7,2<br>7,28,29,31 5,30,32 | 3 P70549,Q63474,Q6P6R2                                                                                          |
| 6269 | 1,6,8,26,2 2,3,4,5,7,2<br>7,28,29,32 5,30,31 | 15 O35547,P00758,P08010,P08723,P29315,P30120,P47727,P70549,Q6AYR9,Q6P6R2,Q812E4,Q8C<br>FN2,Q9JI85,Q9QW07,Q9QWN8 |
| 6270 | 1,6,8,26,2 2,3,4,5,7,2<br>7,28,30,31 5,29,32 | 1 P15399                                                                                                        |
| 6271 | 1,6,8,26,2 2,3,4,5,7,2<br>7,28,30,32 5,29,31 | 7 B0LT89,P15399,P29315,Q6AYR9,Q6P6S4,Q8VD89,Q9QWN8                                                              |
| 6272 | 1,6,8,26,2 2,3,4,5,7,2<br>7,28,31,32 5,29,30 | 5 B0LT89,P15399,P22006,Q6AYR9,Q9QWN8                                                                            |
| 6273 | 1,6,8,26,2 2,3,4,5,7,2<br>7,29,30,31 5,28,32 | 2 Q63474,Q811M5                                                                                                 |
| 6274 | 1,6,8,26,2 2,3,4,5,7,2<br>7,29,30,32 5,28,31 | 2 P29315,Q811M5                                                                                                 |
| 6275 | 1,6,8,26,2 2,3,4,5,7,2<br>7,29,31,32 5,28,30 | 2 P70549,Q63474                                                                                                 |
| 6276 | 1,6,8,26,2 2,3,4,5,7,2<br>7,30,31,32 5,28,29 | 3 O89117,P22006,P54921                                                                                          |
| 6277 | 1,6,8,26,2 2,3,4,5,7,2<br>8,29,30,31 5,27,32 | 2 P35745,Q63474                                                                                                 |
| 6278 | 1,6,8,26,2 2,3,4,5,7,2<br>8,29,30,32 5,27,31 | 5 P20766,P29315,Q63474,Q68G31,Q9QW07                                                                            |
| 6279 | 1,6,8,26,2 2,3,4,5,7,2<br>8,29,31,32 5,27,30 | 3 P30120,P70549,Q63474                                                                                          |

|      |                               |                        |    |                                                                              |
|------|-------------------------------|------------------------|----|------------------------------------------------------------------------------|
| 6280 | 1,6,8,26,2<br>8,30,31,32      | 2,3,4,5,7,2<br>5,27,29 | 5  | O89117,P22006,P35745,Q63474,Q8VD89                                           |
| 6281 | 1,6,8,26,2<br>9,30,31,32      | 2,3,4,5,7,2<br>5,27,28 | 2  | P36860,Q63474                                                                |
| 6282 | 1,6,8,27,2<br>8,29,30,31      | 2,3,4,5,7,2<br>5,26,32 | 1  | Q63474                                                                       |
| 6283 | 1,6,8,27,2<br>8,29,30,32      | 2,3,4,5,7,2<br>5,26,31 | 11 | BOLT89,O35547,P00758,P18298,P20766,P29315,Q6AYR9,Q6P6S4,Q812E4,Q8CFN2,Q9QW07 |
| 6284 | 1,6,8,27,2<br>8,29,31,32      | 2,3,4,5,7,2<br>5,26,30 | 7  | O35547,P08723,P36374,P47727,Q63474,Q6AYR9,Q812E4                             |
| 6285 | 1,6,8,27,2<br>8,30,31,32      | 2,3,4,5,7,2<br>5,26,29 | 5  | BOLT89,O89117,P22006,Q6AYR9,Q8VD89                                           |
| 6286 | 1,6,8,27,2<br>9,30,31,32      | 2,3,4,5,7,2<br>5,26,28 | 1  | Q63474                                                                       |
| 6287 | 1,6,8,28,2<br>9,30,31,32      | 2,3,4,5,7,2<br>5,26,27 | 3  | P22006,P35745,Q63474                                                         |
| 6288 | 1,6,25,26,<br>27,28,29,3<br>0 | 2,3,4,5,7,8<br>,31,32  | 4  | P05539,P20766,P82471,Q811M5                                                  |
| 6289 | 1,6,25,26,<br>27,28,29,3<br>1 | 2,3,4,5,7,8<br>,30,32  | 3  | P05539,P35280,P70549                                                         |
| 6290 | 1,6,25,26,<br>27,28,29,3<br>2 | 2,3,4,5,7,8<br>,30,31  | 11 | O35547,P00758,P05539,P20766,P36376,P70549,P82471,Q5RJR2,Q6AYR8,Q6AYR9,Q8CGS4 |
| 6291 | 1,6,25,26,<br>27,28,30,3<br>1 | 2,3,4,5,7,8<br>,29,32  | 0  |                                                                              |
| 6292 | 1,6,25,26,<br>27,28,30,3<br>2 | 2,3,4,5,7,8<br>,29,31  | 5  | O70594,P20766,P62804,P82471,Q5RJR2                                           |
| 6293 | 1,6,25,26,<br>27,28,31,3<br>2 | 2,3,4,5,7,8<br>,29,30  | 5  | P22006,P62804,Q5RJR2,Q6IG02,Q9WUW8                                           |
| 6294 | 1,6,25,26,<br>27,29,30,3<br>1 | 2,3,4,5,7,8<br>,28,32  | 2  | P05539,Q811M5                                                                |
| 6295 | 1,6,25,26,<br>27,29,30,3<br>2 | 2,3,4,5,7,8<br>,28,31  | 7  | D3ZUC6,P00758,P20766,P36376,P82471,Q5RLM2,Q811M5                             |

|      |                               |                       |    |                                                                                                   |
|------|-------------------------------|-----------------------|----|---------------------------------------------------------------------------------------------------|
| 6296 | 1,6,25,26,<br>27,29,31,3<br>2 | 2,3,4,5,7,8<br>,28,30 | 3  | P05539,P62804,P70549                                                                              |
| 6297 | 1,6,25,26,<br>27,30,31,3<br>2 | 2,3,4,5,7,8<br>,28,29 | 7  | D3ZUC6,P06760,P47967,P54921,P62804,P97840,Q00715                                                  |
| 6298 | 1,6,25,26,<br>28,29,30,3<br>1 | 2,3,4,5,7,8<br>,27,32 | 2  | P05539,Q6TMA8                                                                                     |
| 6299 | 1,6,25,26,<br>28,29,30,3<br>2 | 2,3,4,5,7,8<br>,27,31 | 6  | P00731,P20766,P36376,P50115,P82471,Q68G31                                                         |
| 6300 | 1,6,25,26,<br>28,29,31,3<br>2 | 2,3,4,5,7,8<br>,27,30 | 9  | O70417,P00731,P05539,P19218,P62804,P70549,Q4G075,Q6IFU7,Q6IFU8                                    |
| 6301 | 1,6,25,26,<br>28,30,31,3<br>2 | 2,3,4,5,7,8<br>,27,29 | 11 | P00731,P06760,P22006,P25809,P47967,P50115,P62804,Q00715,Q4G075,Q5I0D1,Q62975                      |
| 6302 | 1,6,25,26,<br>29,30,31,3<br>2 | 2,3,4,5,7,8<br>,27,28 | 14 | A0JPJ7,D3ZUC6,P00507,P25809,P36860,P47967,P50115,P50116,P62804,P97840,Q00715,Q4G075,Q5I0D1,Q9WVK7 |
| 6303 | 1,6,25,27,<br>28,29,30,3<br>1 | 2,3,4,5,7,8<br>,26,32 | 2  | P05539,P20762                                                                                     |
| 6304 | 1,6,25,27,<br>28,29,30,3<br>2 | 2,3,4,5,7,8<br>,26,31 | 7  | O35547,P00758,P05539,P20762,P20766,P82471,Q5RLM2                                                  |
| 6305 | 1,6,25,27,<br>28,29,31,3<br>2 | 2,3,4,5,7,8<br>,26,30 | 6  | O35547,P00758,P05539,P20762,P36374,Q9WUW8                                                         |
| 6306 | 1,6,25,27,<br>28,30,31,3<br>2 | 2,3,4,5,7,8<br>,26,29 | 6  | O70594,P06760,P20762,P22006,P62804,Q9QX74                                                         |
| 6307 | 1,6,25,27,<br>29,30,31,3<br>2 | 2,3,4,5,7,8<br>,26,28 | 5  | D3ZUC6,P20762,P47967,P97840,Q5RLM2                                                                |
| 6308 | 1,6,25,28,<br>29,30,31,3<br>2 | 2,3,4,5,7,8<br>,26,27 | 7  | P20762,P25809,P50115,P50116,Q4G075,Q5BJY9,Q5RLM2                                                  |

|      |                               |                        |    |                                                                                                |
|------|-------------------------------|------------------------|----|------------------------------------------------------------------------------------------------|
| 6309 | 1,6,26,27,<br>28,29,30,3<br>1 | 2,3,4,5,7,8<br>,25,32  | 3  | P05539,Q63474,Q811M5                                                                           |
| 6310 | 1,6,26,27,<br>28,29,30,3<br>2 | 2,3,4,5,7,8<br>,25,31  | 6  | P00758,P20766,P29315,P36376,P82471,Q811M5                                                      |
| 6311 | 1,6,26,27,<br>28,29,31,3<br>2 | 2,3,4,5,7,8<br>,25,30  | 8  | O35547,O70417,P00758,P05539,P22006,P36374,P70549,Q63474                                        |
| 6312 | 1,6,26,27,<br>28,30,31,3<br>2 | 2,3,4,5,7,8<br>,25,29  | 4  | P06760,P22006,P62804,Q8VD89                                                                    |
| 6313 | 1,6,26,27,<br>29,30,31,3<br>2 | 2,3,4,5,7,8<br>,25,28  | 5  | P36376,P36860,P62804,Q63474,Q811M5                                                             |
| 6314 | 1,6,26,28,<br>29,30,31,3<br>2 | 2,3,4,5,7,8<br>,25,27  | 7  | P01835,P22006,P36860,P50115,P50116,Q4G075,Q63474                                               |
| 6315 | 1,6,27,28,<br>29,30,31,3<br>2 | 2,3,4,5,7,8<br>,25,26  | 5  | O35547,P05539,P20762,P22006,Q63474                                                             |
| 6316 | 1,7,8,25,2<br>6,27,28,29      | 2,3,4,5,6,3<br>0,31,32 | 13 | P20646,P26342,P47727,P70549,Q4G075,Q6AYR9,Q6P6R2,Q812E4,Q9QW07,Q9QX74,Q9WTT6,<br>Q9WUC4,Q9Z2L0 |
| 6317 | 1,7,8,25,2<br>6,27,28,30      | 2,3,4,5,6,2<br>9,31,32 | 2  | O55145,Q9WTT6                                                                                  |
| 6318 | 1,7,8,25,2<br>6,27,28,31      | 2,3,4,5,6,2<br>9,30,32 | 6  | iRT-Kit_WR_fusion,O55145,P26342,Q63598,Q9WTT6,Q9Z0V6                                           |
| 6319 | 1,7,8,25,2<br>6,27,28,32      | 2,3,4,5,6,2<br>9,30,31 | 7  | P08723,Q5RJR2,Q6AYR9,Q812E4,Q9JHB9,Q9QWN8,Q9WTT6                                               |
| 6320 | 1,7,8,25,2<br>6,27,29,30      | 2,3,4,5,6,2<br>8,31,32 | 2  | Q9QX74,Q9WTT6                                                                                  |
| 6321 | 1,7,8,25,2<br>6,27,29,31      | 2,3,4,5,6,2<br>8,30,32 | 3  | P70549,Q9QX74,Q9WTT6                                                                           |
| 6322 | 1,7,8,25,2<br>6,27,29,32      | 2,3,4,5,6,2<br>8,30,31 | 2  | P13432,Q9WTT6                                                                                  |
| 6323 | 1,7,8,25,2<br>6,27,30,31      | 2,3,4,5,6,2<br>8,29,32 | 1  | O55145                                                                                         |
| 6324 | 1,7,8,25,2<br>6,27,30,32      | 2,3,4,5,6,2<br>8,29,31 | 1  | Q9JHB9                                                                                         |
| 6325 | 1,7,8,25,2<br>6,27,31,32      | 2,3,4,5,6,2<br>8,29,30 | 0  |                                                                                                |

|      |                                              |                                                                                                      |
|------|----------------------------------------------|------------------------------------------------------------------------------------------------------|
| 6326 | 1,7,8,25,2 2,3,4,5,6,2<br>6,28,29,30 7,31,32 | 4 P01039,P35745,Q9QX74,Q9WTT6                                                                        |
| 6327 | 1,7,8,25,2 2,3,4,5,6,2<br>6,28,29,31 7,30,32 | 5 P01039,P70549,Q6P6R2,Q9QX74,Q9WTT6                                                                 |
| 6328 | 1,7,8,25,2 2,3,4,5,6,2<br>6,28,29,32 7,30,31 | 10 P01039,P08723,P13432,P24368,P30120,P47727,P70549,Q812E4,Q9QW07,Q9WTT6                             |
| 6329 | 1,7,8,25,2 2,3,4,5,6,2<br>6,28,30,31 7,29,32 | 2 O08839,P35745                                                                                      |
| 6330 | 1,7,8,25,2 2,3,4,5,6,2<br>6,28,30,32 7,29,31 | 2 P01039,P35745                                                                                      |
| 6331 | 1,7,8,25,2 2,3,4,5,6,2<br>6,28,31,32 7,29,30 | 1 P21588                                                                                             |
| 6332 | 1,7,8,25,2 2,3,4,5,6,2<br>6,29,30,31 7,28,32 | 2 P35745,Q9QX74                                                                                      |
| 6333 | 1,7,8,25,2 2,3,4,5,6,2<br>6,29,30,32 7,28,31 | 0                                                                                                    |
| 6334 | 1,7,8,25,2 2,3,4,5,6,2<br>6,29,31,32 7,28,30 | 4 P13432,P19218,P21588,P70549                                                                        |
| 6335 | 1,7,8,25,2 2,3,4,5,6,2<br>6,30,31,32 7,28,29 | 3 B2RYW9,P35745,Q9WVK7                                                                               |
| 6336 | 1,7,8,25,2 2,3,4,5,6,2<br>7,28,29,30 6,31,32 | 3 P47727,Q812E4,Q9Z2L0                                                                               |
| 6337 | 1,7,8,25,2 2,3,4,5,6,2<br>7,28,29,31 6,30,32 | 3 P47727,Q812E4,Q99MH3                                                                               |
| 6338 | 1,7,8,25,2 2,3,4,5,6,2<br>7,28,29,32 6,30,31 | 14 O35547,P00758,P08010,P08723,P0C0A9,P24368,P30120,P47727,Q5RJR2,Q6AYR9,Q812E4,Q9QW07,Q9WUC4,Q9Z2L0 |
| 6339 | 1,7,8,25,2 2,3,4,5,6,2<br>7,28,30,31 6,29,32 | 1 P35745                                                                                             |
| 6340 | 1,7,8,25,2 2,3,4,5,6,2<br>7,28,30,32 6,29,31 | 3 Q6AYR9,Q812E4,Q9JHB9                                                                               |
| 6341 | 1,7,8,25,2 2,3,4,5,6,2<br>7,28,31,32 6,29,30 | 5 P08723,P21588,Q6AYR9,Q80WL1,Q812E4                                                                 |
| 6342 | 1,7,8,25,2 2,3,4,5,6,2<br>7,29,30,31 6,28,32 | 0                                                                                                    |
| 6343 | 1,7,8,25,2 2,3,4,5,6,2<br>7,29,30,32 6,28,31 | 0                                                                                                    |
| 6344 | 1,7,8,25,2 2,3,4,5,6,2<br>7,29,31,32 6,28,30 | 2 P21588,Q80WL1                                                                                      |
| 6345 | 1,7,8,25,2 2,3,4,5,6,2<br>7,30,31,32 6,28,29 | 1 P21588                                                                                             |

|      |                          |                        |    |                                                                                                                        |
|------|--------------------------|------------------------|----|------------------------------------------------------------------------------------------------------------------------|
| 6346 | 1,7,8,25,2<br>8,29,30,31 | 2,3,4,5,6,2<br>6,27,32 | 3  | P01039,P35745,Q9JJ50                                                                                                   |
| 6347 | 1,7,8,25,2<br>8,29,30,32 | 2,3,4,5,6,2<br>6,27,31 | 5  | P01039,P08723,P30120,Q812E4,Q9Z2L0                                                                                     |
| 6348 | 1,7,8,25,2<br>8,29,31,32 | 2,3,4,5,6,2<br>6,27,30 | 6  | P01039,P08723,P21588,P30120,Q80WL1,Q812E4                                                                              |
| 6349 | 1,7,8,25,2<br>8,30,31,32 | 2,3,4,5,6,2<br>6,27,29 | 3  | P21588,P35745,Q9JJ50                                                                                                   |
| 6350 | 1,7,8,25,2<br>9,30,31,32 | 2,3,4,5,6,2<br>6,27,28 | 2  | P21588,Q9WVK7                                                                                                          |
| 6351 | 1,7,8,26,2<br>7,28,29,30 | 2,3,4,5,6,2<br>5,31,32 | 6  | P29315,Q4KLZ6,Q6P6R2,Q812E4,Q9QX74,Q9WTT6                                                                              |
| 6352 | 1,7,8,26,2<br>7,28,29,31 | 2,3,4,5,6,2<br>5,30,32 | 11 | iRT-<br>Kit_WR_fusion,P20646,P70549,P97523,Q4KLZ6,Q63474,Q6P6R2,Q812E4,Q9ES87,Q9QX74,Q9WTT6                            |
| 6353 | 1,7,8,26,2<br>7,28,29,32 | 2,3,4,5,6,2<br>5,30,31 | 17 | O35547,P00758,P08010,P08723,P24368,P29315,P30120,P47727,Q4KLZ6,Q6AYR9,Q6P6R2,Q812E4,Q8CFN2,Q9QWN8,Q9QX74,Q9WTT6,Q9Z2L0 |
| 6354 | 1,7,8,26,2<br>7,28,30,31 | 2,3,4,5,6,2<br>5,29,32 | 5  | iRT-Kit_WR_fusion,O55145,P35745,Q4KLZ6,Q9WTT6                                                                          |
| 6355 | 1,7,8,26,2<br>7,28,30,32 | 2,3,4,5,6,2<br>5,29,31 | 5  | P29315,Q4KLZ6,Q6AYR9,Q812E4,Q9QWN8                                                                                     |
| 6356 | 1,7,8,26,2<br>7,28,31,32 | 2,3,4,5,6,2<br>5,29,30 | 4  | P08723,Q4KLZ6,Q6AYR9,Q9QWN8                                                                                            |
| 6357 | 1,7,8,26,2<br>7,29,30,31 | 2,3,4,5,6,2<br>5,28,32 | 3  | Q4KLZ6,Q63474,Q9QX74                                                                                                   |
| 6358 | 1,7,8,26,2<br>7,29,30,32 | 2,3,4,5,6,2<br>5,28,31 | 2  | P29315,Q4KLZ6                                                                                                          |
| 6359 | 1,7,8,26,2<br>7,29,31,32 | 2,3,4,5,6,2<br>5,28,30 | 3  | Q4KLZ6,Q63474,Q9QX74                                                                                                   |
| 6360 | 1,7,8,26,2<br>7,30,31,32 | 2,3,4,5,6,2<br>5,28,29 | 1  | Q4KLZ6                                                                                                                 |
| 6361 | 1,7,8,26,2<br>8,29,30,31 | 2,3,4,5,6,2<br>5,27,32 | 6  | P01039,P21674,P35745,Q4KLZ6,Q63474,Q9QX74                                                                              |
| 6362 | 1,7,8,26,2<br>8,29,30,32 | 2,3,4,5,6,2<br>5,27,31 | 7  | P01039,P08723,P29315,P30120,P35745,Q4KLZ6,Q812E4                                                                       |
| 6363 | 1,7,8,26,2<br>8,29,31,32 | 2,3,4,5,6,2<br>5,27,30 | 7  | P01039,P08723,P30120,P70549,Q4KLZ6,Q63474,Q9QX74                                                                       |
| 6364 | 1,7,8,26,2<br>8,30,31,32 | 2,3,4,5,6,2<br>5,27,29 | 3  | O08839,P35745,Q4KLZ6                                                                                                   |
| 6365 | 1,7,8,26,2<br>9,30,31,32 | 2,3,4,5,6,2<br>5,27,28 | 3  | P35745,Q4KLZ6,Q63474                                                                                                   |

|      |                                                  |                                                                                                   |
|------|--------------------------------------------------|---------------------------------------------------------------------------------------------------|
| 6366 | 1,7,8,27,2 2,3,4,5,6,2<br>8,29,30,31 5,26,32     | 5 P35745,Q06000,Q4KLZ6,Q63474,Q812E4                                                              |
| 6367 | 1,7,8,27,2 2,3,4,5,6,2<br>8,29,30,32 5,26,31     | 11 P00758,P08723,P18298,P29315,P30120,P47727,Q4KLZ6,Q63150,Q6AYR9,Q812E4,Q9Z2L0                   |
| 6368 | 1,7,8,27,2 2,3,4,5,6,2<br>8,29,31,32 5,26,30     | 13 O08815,O35547,P08723,P21588,P30120,P36374,P47727,Q06000,Q4KLZ6,Q63474,Q63493,Q6A<br>YR9,Q812E4 |
| 6369 | 1,7,8,27,2 2,3,4,5,6,2<br>8,30,31,32 5,26,29     | 4 B0LT89,P35745,Q4KLZ6,Q6AYR9                                                                     |
| 6370 | 1,7,8,27,2 2,3,4,5,6,2<br>9,30,31,32 5,26,28     | 2 Q4KLZ6,Q63474                                                                                   |
| 6371 | 1,7,8,28,2 2,3,4,5,6,2<br>9,30,31,32 5,26,27     | 7 P01039,P08723,P17559,P21588,P35745,Q4KLZ6,Q63474                                                |
| 6372 | 1,7,25,26, 2,3,4,5,6,8<br>27,28,29,3 ,31,32<br>0 | 5 P20646,P36376,Q05702,Q63532,Q9QZQ5                                                              |
| 6373 | 1,7,25,26, 2,3,4,5,6,8<br>27,28,29,3 ,30,32<br>1 | 4 O88797,P20646,P70549,P97615                                                                     |
| 6374 | 1,7,25,26, 2,3,4,5,6,8<br>27,28,29,3 ,30,31<br>2 | 10 P00758,P36376,Q05702,Q5RJR2,Q63532,Q6AYR9,Q812E4,Q8CGS4,Q9WUC4,Q9Z2L0                          |
| 6375 | 1,7,25,26, 2,3,4,5,6,8<br>27,28,30,3 ,29,32<br>1 | 3 O55145,P42854,Q9QZQ5                                                                            |
| 6376 | 1,7,25,26, 2,3,4,5,6,8<br>27,28,30,3 ,29,31<br>2 | 5 P36376,Q05702,Q5RJR2,Q63532,Q9R168                                                              |
| 6377 | 1,7,25,26, 2,3,4,5,6,8<br>27,28,31,3 ,29,30<br>2 | 5 O88797,P42854,Q5RJR2,Q6IFU7,Q6IG02                                                              |
| 6378 | 1,7,25,26, 2,3,4,5,6,8<br>27,29,30,3 ,28,32<br>1 | 1 Q9QZQ5                                                                                          |
| 6379 | 1,7,25,26, 2,3,4,5,6,8<br>27,29,30,3 ,28,31<br>2 | 6 P00758,P36376,Q63532,Q99PP0,Q9QZQ5,Q9R168                                                       |
| 6380 | 1,7,25,26, 2,3,4,5,6,8<br>27,29,31,3 ,28,30<br>2 | 2 P19218,P36376                                                                                   |



|      |                               |                       |                                                                  |
|------|-------------------------------|-----------------------|------------------------------------------------------------------|
| 6381 | 1,7,25,26,<br>27,30,31,3<br>2 | 2,3,4,5,6,8<br>,28,29 | 2 D3ZUC6,P42854                                                  |
| 6382 | 1,7,25,26,<br>28,29,30,3<br>1 | 2,3,4,5,6,8<br>,27,32 | 1 Q9QZQ5                                                         |
| 6383 | 1,7,25,26,<br>28,29,30,3<br>2 | 2,3,4,5,6,8<br>,27,31 | 6 P01039,P17559,P36376,Q63532,Q9QZQ5,Q9R168                      |
| 6384 | 1,7,25,26,<br>28,29,31,3<br>2 | 2,3,4,5,6,8<br>,27,30 | 6 P00731,P01039,P19218,P70549,Q10758,Q6IFU7                      |
| 6385 | 1,7,25,26,<br>28,30,31,3<br>2 | 2,3,4,5,6,8<br>,27,29 | 5 O08839,P00731,P42854,Q62975,Q9QZQ5                             |
| 6386 | 1,7,25,26,<br>29,30,31,3<br>2 | 2,3,4,5,6,8<br>,27,28 | 6 D3ZUC6,P17559,P19218,P36376,Q9QZQ5,Q9WVK7                      |
| 6387 | 1,7,25,27,<br>28,29,30,3<br>1 | 2,3,4,5,6,8<br>,26,32 | 4 P20762,Q64240,Q99MH3,Q9QZQ5                                    |
| 6388 | 1,7,25,27,<br>28,29,30,3<br>2 | 2,3,4,5,6,8<br>,26,31 | 9 P00758,P36376,Q05702,Q5RJR2,Q63532,Q6AYR9,Q812E4,Q99PP0,Q9Z2L0 |
| 6389 | 1,7,25,27,<br>28,29,31,3<br>2 | 2,3,4,5,6,8<br>,26,30 | 7 P00758,P20762,P36374,Q5RJR2,Q812E4,Q8CGS4,Q99MH3               |
| 6390 | 1,7,25,27,<br>28,30,31,3<br>2 | 2,3,4,5,6,8<br>,26,29 | 2 P42854,Q5RJR2                                                  |
| 6391 | 1,7,25,27,<br>29,30,31,3<br>2 | 2,3,4,5,6,8<br>,26,28 | 4 P08649,P20762,Q99PP0,Q9QZQ5                                    |
| 6392 | 1,7,25,28,<br>29,30,31,3<br>2 | 2,3,4,5,6,8<br>,26,27 | 5 P17559,P20762,Q5BJY9,Q9JJ50,Q9QZQ5                             |
| 6393 | 1,7,26,27,<br>28,29,30,3<br>1 | 2,3,4,5,6,8<br>,25,32 | 3 Q4KLZ6,Q63474,Q9QZQ5                                           |

|      |                               |                       |    |                                                                                     |
|------|-------------------------------|-----------------------|----|-------------------------------------------------------------------------------------|
| 6394 | 1,7,26,27,<br>28,29,30,3<br>2 | 2,3,4,5,6,8<br>,25,31 | 10 | P00758,P29315,P36376,Q05702,Q4KLZ6,Q63532,Q6AYR9,Q812E4,Q99PP0,Q9QZQ5               |
| 6395 | 1,7,26,27,<br>28,29,31,3<br>2 | 2,3,4,5,6,8<br>,25,30 | 5  | O88797,P36374,P70549,Q4KLZ6,Q63474                                                  |
| 6396 | 1,7,26,27,<br>28,30,31,3<br>2 | 2,3,4,5,6,8<br>,25,29 | 2  | P42854,Q4KLZ6                                                                       |
| 6397 | 1,7,26,27,<br>29,30,31,3<br>2 | 2,3,4,5,6,8<br>,25,28 | 6  | P08649,P36376,P36860,Q4KLZ6,Q99PP0,Q9QZQ5                                           |
| 6398 | 1,7,26,28,<br>29,30,31,3<br>2 | 2,3,4,5,6,8<br>,25,27 | 6  | P01835,P17559,P36376,Q4KLZ6,Q63474,Q9QZQ5                                           |
| 6399 | 1,7,27,28,<br>29,30,31,3<br>2 | 2,3,4,5,6,8<br>,25,26 | 6  | P08649,Q4KLZ6,Q63474,Q64240,Q99PP0,Q9QZQ5                                           |
| 6400 | 1,8,25,26,<br>27,28,29,3<br>0 | 2,3,4,5,6,7<br>,31,32 | 4  | P20766,P26342,P80299,Q6P6R2                                                         |
| 6401 | 1,8,25,26,<br>27,28,29,3<br>1 | 2,3,4,5,6,7<br>,30,32 | 3  | P26342,P70549,Q6P6R2                                                                |
| 6402 | 1,8,25,26,<br>27,28,29,3<br>2 | 2,3,4,5,6,7<br>,30,31 | 12 | P00758,P08010,P20766,P26342,P30120,P47727,Q5RJR2,Q6AYR9,Q6P6R2,Q812E4,Q8CFN2,Q9QWN8 |
| 6403 | 1,8,25,26,<br>27,28,30,3<br>1 | 2,3,4,5,6,7<br>,29,32 | 3  | O55145,P26342,P42854                                                                |
| 6404 | 1,8,25,26,<br>27,28,30,3<br>2 | 2,3,4,5,6,7<br>,29,31 | 3  | P20766,Q6AYR9,Q9QWN8                                                                |
| 6405 | 1,8,25,26,<br>27,28,31,3<br>2 | 2,3,4,5,6,7<br>,29,30 | 4  | Q5RJR2,Q6AYR9,Q80WL1,Q9QWN8                                                         |
| 6406 | 1,8,25,26,<br>27,29,30,3<br>1 | 2,3,4,5,6,7<br>,28,32 | 0  |                                                                                     |

|      |                               |                       |                                                           |
|------|-------------------------------|-----------------------|-----------------------------------------------------------|
| 6407 | 1,8,25,26,<br>27,29,30,3<br>2 | 2,3,4,5,6,7<br>,28,31 | 1 P20766                                                  |
| 6408 | 1,8,25,26,<br>27,29,31,3<br>2 | 2,3,4,5,6,7<br>,28,30 | 2 P13432,Q80WL1                                           |
| 6409 | 1,8,25,26,<br>27,30,31,3<br>2 | 2,3,4,5,6,7<br>,28,29 | 4 P42854,P47967,P54921,P97840                             |
| 6410 | 1,8,25,26,<br>28,29,30,3<br>1 | 2,3,4,5,6,7<br>,27,32 | 5 O08839,P00714,P01039,P50116,Q5I0D7                      |
| 6411 | 1,8,25,26,<br>28,29,30,3<br>2 | 2,3,4,5,6,7<br>,27,31 | 4 P01039,P20766,P30120,P50116                             |
| 6412 | 1,8,25,26,<br>28,29,31,3<br>2 | 2,3,4,5,6,7<br>,27,30 | 8 P01039,P19218,P21588,P30120,P50116,P70549,Q63474,Q80WL1 |
| 6413 | 1,8,25,26,<br>28,30,31,3<br>2 | 2,3,4,5,6,7<br>,27,29 | 6 O08839,P01039,P42854,P47967,P50116,Q9JJ50               |
| 6414 | 1,8,25,26,<br>29,30,31,3<br>2 | 2,3,4,5,6,7<br>,27,28 | 4 P00507,P47967,P50115,P50116                             |
| 6415 | 1,8,25,27,<br>28,29,30,3<br>1 | 2,3,4,5,6,7<br>,26,32 | 0                                                         |
| 6416 | 1,8,25,27,<br>28,29,30,3<br>2 | 2,3,4,5,6,7<br>,26,31 | 8 P00758,P20766,P47727,Q63150,Q6AYR9,Q812E4,Q9WVH8,Q9Z2L0 |
| 6417 | 1,8,25,27,<br>28,29,31,3<br>2 | 2,3,4,5,6,7<br>,26,30 | 8 O35547,P21588,P30120,P36374,P47727,Q6AYR9,Q80WL1,Q812E4 |
| 6418 | 1,8,25,27,<br>28,30,31,3<br>2 | 2,3,4,5,6,7<br>,26,29 | 2 P21588,P42854                                           |
| 6419 | 1,8,25,27,<br>29,30,31,3<br>2 | 2,3,4,5,6,7<br>,26,28 | 4 P21588,P47967,Q5RLM2,Q99PP0                             |

|      |                                |                       |    |                                                                                                |
|------|--------------------------------|-----------------------|----|------------------------------------------------------------------------------------------------|
| 6420 | 1,8,25,28,<br>29,30,31,3<br>2  | 2,3,4,5,6,7<br>,26,27 | 6  | O08839,P01039,P21588,P50115,P50116,Q9JJ50                                                      |
| 6421 | 1,8,26,27,<br>28,29,30,3<br>1  | 2,3,4,5,6,7<br>,25,32 | 2  | Q4KLZ6,Q63474                                                                                  |
| 6422 | 1,8,26,27,<br>28,29,30,3<br>2  | 2,3,4,5,6,7<br>,25,31 | 10 | P00758,P20766,P29315,Q4KLZ6,Q6AYR9,Q812E4,Q8CFN2,Q99PP0,Q9QWN8,Q9WVH8                          |
| 6423 | 1,8,26,27,<br>28,29,31,3<br>2  | 2,3,4,5,6,7<br>,25,30 | 9  | O35547,P30120,P36374,P70549,Q4KLZ6,Q63474,Q6AYR9,Q812E4,Q9QWN8                                 |
| 6424 | 1,8,26,27,<br>28,30,31,3<br>2  | 2,3,4,5,6,7<br>,25,29 | 4  | B0LT89,P42854,Q4KLZ6,Q9QWN8                                                                    |
| 6425 | 1,8,26,27,<br>29,30,31,3<br>2  | 2,3,4,5,6,7<br>,25,28 | 3  | Q4KLZ6,Q63474,Q99PP0                                                                           |
| 6426 | 1,8,26,28,<br>29,30,31,3<br>2  | 2,3,4,5,6,7<br>,25,27 | 7  | O08839,P01039,P50115,P50116,Q4KLZ6,Q5I0D7,Q63474                                               |
| 6427 | 1,8,27,28,<br>29,30,31,3<br>2  | 2,3,4,5,6,7<br>,25,26 | 7  | Q4KLZ6,Q63150,Q63474,Q6AYR9,Q812E4,Q99PP0,Q9WVH8                                               |
| 6428 | 1,25,26,27<br>,28,29,30,<br>31 | 2,3,4,5,6,7<br>,8,32  | 9  | P02454,P02631,P42854,P50115,P52590,Q64240,Q99041,Q99PP0,Q9QZQ5                                 |
| 6429 | 1,25,26,27<br>,28,29,30,<br>32 | 2,3,4,5,6,7<br>,8,31  | 11 | P00758,P13852,P20766,P36376,P50115,P82471,Q05702,Q5RJR2,Q63532,Q99PP0,Q9QZQ5                   |
| 6430 | 1,25,26,27<br>,28,29,31,<br>32 | 2,3,4,5,6,7<br>,8,30  | 13 | O70417,P00758,P13852,P19218,P36374,P50115,P62804,P70549,Q5RJR2,Q8CGS4,Q99041,Q99P<br>P0,Q9QZQ5 |
| 6431 | 1,25,26,27<br>,28,30,31,<br>32 | 2,3,4,5,6,7<br>,8,29  | 13 | D3ZUC6,O70594,P13852,P22273,P42854,P50115,P52590,P62804,Q00715,Q5RJR2,Q99041,Q99<br>PP0,Q9QZQ5 |
| 6432 | 1,25,26,27<br>,29,30,31,<br>32 | 2,3,4,5,6,7<br>,8,28  | 11 | D3ZUC6,P02631,P13852,P22273,P47967,P50115,P52590,P62804,Q99041,Q99PP0,Q9QZQ5                   |

|      |                                |                      |    |                                                                                                   |
|------|--------------------------------|----------------------|----|---------------------------------------------------------------------------------------------------|
| 6433 | 1,25,26,28<br>,29,30,31,<br>32 | 2,3,4,5,6,7<br>,8,27 | 14 | D3ZUC6,O08839,P00731,P01039,P17559,P19218,P22273,P50115,P50116,P62804,Q4G075,Q99041,Q99PP0,Q9QZQ5 |
| 6434 | 1,25,27,28<br>,29,30,31,<br>32 | 2,3,4,5,6,7<br>,8,26 | 12 | P00758,P13852,P20761,P20762,P22273,P50115,Q5RJR2,Q5RLM2,Q64240,Q99041,Q99PP0,Q9QZQ5               |
| 6435 | 1,26,27,28<br>,29,30,31,<br>32 | 2,3,4,5,6,7<br>,8,25 | 12 | O70417,P00758,P02454,P02631,P13852,P22273,P50115,Q4KLZ6,Q63474,Q64240,Q99PP0,Q9QZQ5               |

#### Day 28

| Random allocation | Group1               | Group2                          | Numbers of differential urinary proteins | Differential protein ID                                                                                                                                                                                                                                            |
|-------------------|----------------------|---------------------------------|------------------------------------------|--------------------------------------------------------------------------------------------------------------------------------------------------------------------------------------------------------------------------------------------------------------------|
| 1                 | 1,2,3,4,5,6<br>,7,8  | 33,34,35,3<br>6,37,38,39<br>,40 | 36                                       | B5DFC9,O35276,O35568,O54858,O88339;Q4V882,P02454,P07897,P0C0K7,P17559,P19218,P20762,P23593,P26453,P33436,P35444,P36374,P36376,P42854,P48199,P49744,P52590,P80202,P85971,Q05702,Q09030,Q4AEF8,Q63149,Q6DGG1,Q8CG08,Q8K4G9,Q91XN4,Q99PP0,Q9JJ50,Q9QW30,Q9QZQ5,Q9Z1F2 |
| 2                 | 1,2,3,4,5,6<br>,7,33 | 8,34,35,36<br>,37,38,39,<br>40  | 19                                       | O35276,O54800;Q5DWV2,P08721,P16636,P35444,P35745,P36374,P42854,P52590,P85971,Q09030,Q4AEF8,Q5I0D7,Q63475,Q6AYQ8,Q91XN4,Q99PP0,Q9QW30,Q9QZQ5                                                                                                                        |
| 3                 | 1,2,3,4,5,6<br>,7,34 | 8,33,35,36<br>,37,38,39,<br>40  | 20                                       | O35276,P33436,P36374,P42854,P48199,P52590,P60905,Q09030,Q4AEF8,Q4TU93,Q5I0D7,Q68G31,Q6AY61,Q8K4G9,Q91XN4,Q99PP0,Q9JJ50,Q9QW30,Q9QWN8,Q9Z1F2                                                                                                                        |
| 4                 | 1,2,3,4,5,6<br>,7,35 | 8,33,34,36<br>,37,38,39,<br>40  | 18                                       | P19132,P19218,P23593,P36374,P42854,P52590,P85971,P97840,Q09030,Q4AEF8,Q4TU93,Q5I0D7,Q5PPH0,Q63149,Q63474,Q8K4G9,Q91XN4,Q9QWN8                                                                                                                                      |
| 5                 | 1,2,3,4,5,6<br>,7,36 | 8,33,34,35<br>,37,38,39,<br>40  | 18                                       | O35276,P09656,P19218,P36374,P42854,P47967,P52590,P97840,Q09030,Q4AEF8,Q5I0D1,Q5I0D7,Q8K4G9,Q91XN4,Q923V8,Q99PP0,Q9JJ50,Q9QWN8                                                                                                                                      |
| 6                 | 1,2,3,4,5,6<br>,7,37 | 8,33,34,35<br>,36,38,39,<br>40  | 18                                       | P01835,P11598,P19132,P19218,P23593,P33436,P42854,P47967,P52590,P82471,P97840,Q00657,Q09030,Q4AEF8,Q6AY61,Q8K4G9,Q91XN4,Q9JJ50                                                                                                                                      |
| 7                 | 1,2,3,4,5,6<br>,7,38 | 8,33,34,35<br>,36,37,39,<br>40  | 17                                       | O35276,P13432,P19218,P24368,P36374,P42854,P50116,P52590,P60905,P84039,Q09030,Q4AEF8,Q6P6R2,Q8K4G9,Q91XN4,Q923V8,Q9QWN8                                                                                                                                             |
| 8                 | 1,2,3,4,5,6<br>,7,39 | 8,33,34,35<br>,36,37,38,<br>40  | 12                                       | P23593,P36374,P42854,P52590,P63029,Q09030,Q4AEF8,Q6AYQ8,Q8K4G9,Q91XN4,Q9QX79,Q9Z1F2                                                                                                                                                                                |
| 9                 | 1,2,3,4,5,6<br>,7,40 | 8,33,34,35<br>,36,37,38,<br>39  | 9                                        | P36374,P42854,P52590,P82471,Q09030,Q4AEF8,Q6P6R2,Q91XN4,Q9QWN8                                                                                                                                                                                                     |

|    |                       |                                |                                                                                                                                                                                                         |
|----|-----------------------|--------------------------------|---------------------------------------------------------------------------------------------------------------------------------------------------------------------------------------------------------|
| 10 | 1,2,3,4,5,6<br>,8,33  | 7,34,35,36<br>,37,38,39,<br>40 | O35276,O54800;Q5DWV2,O54858,P02454,P16636,P17559,P23593,P35745,P36374,P36376,P42<br>26 854,P52590,P80202,P85971,Q05702,Q09030,Q4AEF8,Q5I0D7,Q63475,Q6IG05,Q8CG08,Q91XN<br>4,Q99MH3,Q99PP0,Q9QW30,Q9QZQ5 |
| 11 | 1,2,3,4,5,6<br>,8,34  | 7,33,35,36<br>,37,38,39,<br>40 | O35276,O54858,P17559,P20762,P33436,P36374,P36376,P42854,P48199,P52590,P80202,P8597<br>26 1,P97580,Q05702,Q09030,Q30KJ2,Q4AEF8,Q5I0D7,Q63475,Q6IG05,Q8CG08,Q8K4G9,Q91XN4,<br>Q99PP0,Q9JJ50,Q9QZQ5        |
| 12 | 1,2,3,4,5,6<br>,8,35  | 7,33,34,36<br>,37,38,39,<br>40 | O35276,O54858,P19218,P23593,P30919,P36374,P36376,P42854,P48199,P52590,P80202,P8247<br>23 1,P85971,Q05702,Q09030,Q4AEF8,Q5PPH0,Q63149,Q64093,Q6DGG1,Q8CG08,Q8K4G9,Q91X<br>N4                             |
| 13 | 1,2,3,4,5,6<br>,8,36  | 7,33,34,35<br>,37,38,39,<br>40 | O35276,P09656,P19218,P36374,P36376,P42854,P48199,P52590,P80202,P82471,P85971,Q0570<br>18 2,Q09030,Q4AEF8,Q8K4G9,Q91XN4,Q99PP0,Q9QZQ5                                                                    |
| 14 | 1,2,3,4,5,6<br>,8,37  | 7,33,34,35<br>,36,38,39,<br>40 | P19218,P23593,P33436,P36376,P42854,P52590,P82471,P85971,Q00657,Q05702,Q09030,Q4AE<br>16 F8,Q6DGG1,Q8K4G9,Q91XN4,Q9JJ50                                                                                  |
| 15 | 1,2,3,4,5,6<br>,8,38  | 7,33,34,35<br>,36,37,39,<br>40 | O35276,O88339;Q4V882,P19218,P36374,P36376,P42854,P52590,P82471,P85971,Q05702,Q090<br>16 30,Q4AEF8,Q6DGG1,Q6IG05,Q6P6Q2,Q91XN4                                                                           |
| 16 | 1,2,3,4,5,6<br>,8,39  | 7,33,34,35<br>,36,37,38,<br>40 | P20762,P23593,P30919,P36374,P36376,P42854,P52590,P80202,P82471,P85971,Q05702,Q0903<br>16 0,Q4AEF8,Q8K4G9,Q91XN4,Q9R168                                                                                  |
| 17 | 1,2,3,4,5,6<br>,8,40  | 7,33,34,35<br>,36,37,38,<br>39 | B5DFC9,O35276,O35568,O54858,P23593,P25031,P36374,P36376,P42854,P52590,P80202,P824<br>18 71,P85971,Q05702,Q09030,Q4AEF8,Q8CG08,Q91XN4                                                                    |
| 18 | 1,2,3,4,5,6<br>,33,34 | 7,8,35,36,<br>37,38,39,4<br>0  | O54800;Q5DWV2,P33436,P35745,P42854,P52590,Q09030,Q4AEF8,Q5I0D7,Q63475,Q91XN4,Q<br>13 99MH3,Q99PP0,Q9Z2L0                                                                                                |
| 19 | 1,2,3,4,5,6<br>,33,35 | 7,8,34,36,<br>37,38,39,4<br>0  | O54800;Q5DWV2,P35745,P42854,P52590,P62804,Q09030,Q4AEF8,Q5I0D7,Q5PPH0,Q63149,Q<br>15 63475,Q64093,Q812E4,Q91XN4,Q9Z2L0                                                                                  |
| 20 | 1,2,3,4,5,6<br>,33,36 | 7,8,34,35,<br>37,38,39,4<br>0  | O54800;Q5DWV2,P09656,P11883,P16636,P35745,P42854,P52590,P97584,Q09030,Q4AEF8,Q5I<br>16 0D7,Q91XN4,Q923V8,Q99MH3,Q99PP0,Q9QZQ5                                                                           |
| 21 | 1,2,3,4,5,6<br>,33,37 | 7,8,34,35,<br>36,38,39,4<br>0  | 9 D3ZTX0,O54800;Q5DWV2,P35745,P42854,P52590,Q00657,Q09030,Q4AEF8,Q91XN4                                                                                                                                 |
| 22 | 1,2,3,4,5,6<br>,33,38 | 7,8,34,35,<br>36,37,39,4<br>0  | O54800;Q5DWV2,P35745,P42854,P52590,Q09030,Q4AEF8,Q63475,Q6P6R2,Q812E4,Q91XN4,<br>11 Q923V8                                                                                                              |

|    |                       |                               |    |                                                                                                                                          |
|----|-----------------------|-------------------------------|----|------------------------------------------------------------------------------------------------------------------------------------------|
| 23 | 1,2,3,4,5,6<br>,33,39 | 7,8,34,35,<br>36,37,38,4<br>0 | 11 | O54800;Q5DWV2,P23593,P35745,P42854,P52590,Q09030,Q4AEF8,Q6AYQ8,Q91XN4,Q99MH3,<br>Q9Z2L0                                                  |
| 24 | 1,2,3,4,5,6<br>,33,40 | 7,8,34,35,<br>36,37,38,3<br>9 | 9  | O54800;Q5DWV2,P35745,P42854,P52590,Q09030,Q4AEF8,Q63475,Q6P6R2,Q91XN4                                                                    |
| 25 | 1,2,3,4,5,6<br>,34,35 | 7,8,33,36,<br>37,38,39,4<br>0 | 13 | P36374,P42854,P52590,Q09030,Q4AEF8,Q4TU93,Q5I0D7,Q64093,Q812E4,Q8K4G9,Q91XN4,Q<br>9QWN8,Q9Z2L0                                           |
| 26 | 1,2,3,4,5,6<br>,34,36 | 7,8,33,35,<br>37,38,39,4<br>0 | 12 | O55145,P11883,P42854,P52590,P97584,Q09030,Q4KLZ6,Q5I0D7,Q8K4G9,Q91XN4,Q9JJ50,Q9<br>QWN8                                                  |
| 27 | 1,2,3,4,5,6<br>,34,37 | 7,8,33,35,<br>36,38,39,4<br>0 | 9  | P33436,P52590,Q4AEF8,Q4KLZ6,Q4TU93,Q5I0D7,Q8K4G9,Q91XN4,Q9JJ50                                                                           |
| 28 | 1,2,3,4,5,6<br>,34,38 | 7,8,33,35,<br>36,37,39,4<br>0 | 14 | P01946,P02091,P33436,P36374,P42854,P52590,P60905,Q4KLZ6,Q4TU93,Q6P6R2,Q812E4,Q8K<br>4G9,Q91XN4,Q9QWN8                                    |
| 29 | 1,2,3,4,5,6<br>,34,39 | 7,8,33,35,<br>36,37,38,4<br>0 | 8  | P08723,P30919,P36374,P42854,P52590,Q4AEF8,Q8K4G9,Q91XN4                                                                                  |
| 30 | 1,2,3,4,5,6<br>,34,40 | 7,8,33,35,<br>36,37,38,3<br>9 | 7  | P33436,P36374,P42854,P52590,P97580,Q4KLZ6,Q91XN4                                                                                         |
| 31 | 1,2,3,4,5,6<br>,35,36 | 7,8,33,34,<br>37,38,39,4<br>0 | 15 | P09656,P19132,P19218,P21674,P42854,P52590,P53792,Q09030,Q4AEF8,Q4TU93,Q5I0D7,Q640<br>93,Q8K4G9,Q91XN4,Q9QWN8                             |
| 32 | 1,2,3,4,5,6<br>,35,37 | 7,8,33,34,<br>36,38,39,4<br>0 | 11 | P19132,P19218,P30919,P52590,P82471,Q00657,Q09030,Q4AEF8,Q4TU93,Q64093,Q9QX74                                                             |
| 33 | 1,2,3,4,5,6<br>,35,38 | 7,8,33,34,<br>36,37,39,4<br>0 | 19 | P08723,P19218,P19814,P21674,P24368,P30120,P30919,P36374,P47727,P52590,Q09030,Q4AEF<br>8,Q4TU93,Q63149,Q64093,Q6P6R2,Q812E4,Q9QWN8,Q9QX74 |
| 34 | 1,2,3,4,5,6<br>,35,39 | 7,8,33,34,<br>36,37,38,4<br>0 | 16 | P08723,P09456,P23593,P24368,P30120,P30919,P36374,P47727,P52590,P62898,Q09030,Q4AEF<br>8,Q4TU93,Q5PPH0,Q63149,Q8K4G9                      |
| 35 | 1,2,3,4,5,6<br>,35,40 | 7,8,33,34,<br>36,37,38,3<br>9 | 14 | P08723,P36374,P42854,P52590,P53792,P82471,Q09030,Q4AEF8,Q4TU93,Q63149,Q64093,Q6P<br>6R2,Q91XN4,Q9QX74                                    |

|    |                       |                                |    |                                                                                                              |
|----|-----------------------|--------------------------------|----|--------------------------------------------------------------------------------------------------------------|
| 36 | 1,2,3,4,5,6<br>,36,37 | 7,8,33,34,<br>35,38,39,4<br>0  | 15 | P09656,P11883,P19132,P47967,P52590,P53792,P55091,P82471,P97840,Q00657,Q09030,Q4AEF8,Q8K4G9,Q91XN4,Q9JJ50     |
| 37 | 1,2,3,4,5,6<br>,36,38 | 7,8,33,34,<br>35,37,39,4<br>0  | 11 | P09656,P19218,P21674,P24368,P52590,Q09030,Q4KLZ6,Q91XN4,Q923V8,Q9QWN8,Q9QX74                                 |
| 38 | 1,2,3,4,5,6<br>,36,39 | 7,8,33,34,<br>35,37,38,4<br>0  | 7  | P09656,P42854,P52590,Q09030,Q4AEF8,Q8K4G9,Q91XN4                                                             |
| 39 | 1,2,3,4,5,6<br>,36,40 | 7,8,33,34,<br>35,37,38,3<br>9  | 8  | P42854,P52590,P53792,P82471,Q09030,Q91XN4,Q9QWN8,Q9QX74                                                      |
| 40 | 1,2,3,4,5,6<br>,37,38 | 7,8,33,34,<br>35,36,39,4<br>0  | 8  | P19218,P52590,P82471,Q00657,Q4AEF8,Q4KLZ6,Q4TU93,Q9QX74                                                      |
| 41 | 1,2,3,4,5,6<br>,37,39 | 7,8,33,34,<br>35,36,38,4<br>0  | 8  | P23593,P30919,P52590,P63029,P82471,Q4AEF8,Q8K4G9,Q9QX74                                                      |
| 42 | 1,2,3,4,5,6<br>,37,40 | 7,8,33,34,<br>35,36,38,3<br>9  | 9  | P19132,P33436,P52590,P82471,Q4AEF8,Q4KLZ6,Q91XN4,Q9JJ50,Q9QX74                                               |
| 43 | 1,2,3,4,5,6<br>,38,39 | 7,8,33,34,<br>35,36,37,4<br>0  | 10 | P08723,P24368,P30120,P30919,P36374,P52590,Q4AEF8,Q6P6R2,Q9ES87,Q9QX74                                        |
| 44 | 1,2,3,4,5,6<br>,38,40 | 7,8,33,34,<br>35,36,37,3<br>9  | 9  | P08723,P36374,P52590,P82471,Q4KLZ6,Q6P6R2,Q91XN4,Q9ES87,Q9QX74                                               |
| 45 | 1,2,3,4,5,6<br>,39,40 | 7,8,33,34,<br>35,36,37,3<br>8  | 11 | P08723,P30919,P36374,P42854,P52590,P54921,P82471,Q4AEF8,Q6P6R2,Q91XN4,Q9QX74                                 |
| 46 | 1,2,3,4,5,7<br>,8,33  | 6,34,35,36<br>,37,38,39,<br>40 | 10 | B1H234,P23593,P51740,P70549,P85971,Q09030,Q4AEF8,Q63475,Q6AYQ8,Q91XN4                                        |
| 47 | 1,2,3,4,5,7<br>,8,34  | 6,33,35,36<br>,37,38,39,<br>40 | 15 | B1H234,O35276,P20762,P36374,P47967,P51740,P70549,Q30KJ2,Q4AEF8,Q66H69,Q68G31,Q6I<br>FW6,Q8K4G9,Q91XN4,Q9Z1F2 |
| 48 | 1,2,3,4,5,7<br>,8,35  | 6,33,34,36<br>,37,38,39,<br>40 | 13 | P19218,P23593,P36374,P36376,P36860,P47967,P51740,P85971,P97840,Q4AEF8,Q63149,Q6DG<br>G1,Q9Z1F2               |



|    |                       |                                |    |                                                                                                                 |
|----|-----------------------|--------------------------------|----|-----------------------------------------------------------------------------------------------------------------|
| 49 | 1,2,3,4,5,7<br>,8,36  | 6,33,34,35<br>,37,38,39,<br>40 | 12 | B1H234,P19218,P36374,P47967,P51740,P97840,Q4AEF8,Q5I0D1,Q6DGG1,Q8K4G9,Q91XN4,Q9Z1F2                             |
| 50 | 1,2,3,4,5,7<br>,8,37  | 6,33,34,35<br>,36,38,39,<br>40 | 15 | B1H234,P19218,P22006,P23593,P47967,P51740,P63029,P97840,Q00657,Q4AEF8,Q5I0D1,Q66H69,Q6AYQ8,Q6DGG1,Q6IFW6        |
| 51 | 1,2,3,4,5,7<br>,8,38  | 6,33,34,35<br>,36,37,39,<br>40 | 15 | B1H234,O35276,O88339;Q4V882,P19218,P22006,P35280,P36374,P36376,P70549,Q4AEF8,Q6DGG1,Q6IFU8,Q6IFW6,Q6IG05,Q6P6Q2 |
| 52 | 1,2,3,4,5,7<br>,8,39  | 6,33,34,35<br>,36,37,38,<br>40 | 10 | P20762,P23593,P36374,P36376,P63029,P70549,Q4AEF8,Q6AYQ8,Q8K4G9,Q9Z1F2                                           |
| 53 | 1,2,3,4,5,7<br>,8,40  | 6,33,34,35<br>,36,37,38,<br>39 | 4  | P36374,P36376,Q4AEF8,Q91XN4                                                                                     |
| 54 | 1,2,3,4,5,7<br>,33,34 | 6,8,35,36,<br>37,38,39,4<br>0  | 13 | P08721,P19629,P19939,P35745,P47967,P51740,P70549,P80299,Q5I0D7,Q63475,Q6AYQ8,Q6P6S4,Q9WUW8                      |
| 55 | 1,2,3,4,5,7<br>,33,35 | 6,8,34,36,<br>37,38,39,4<br>0  | 8  | P12020,P19629,P47967,P51740,P97840,Q4AEF8,Q5I0D7,Q63474                                                         |
| 56 | 1,2,3,4,5,7<br>,33,36 | 6,8,34,35,<br>37,38,39,4<br>0  | 7  | P01681,P08721,P47967,P51740,P97840,Q09030,Q5I0D7                                                                |
| 57 | 1,2,3,4,5,7<br>,33,37 | 6,8,34,35,<br>36,38,39,4<br>0  | 5  | P47967,P51740,P97840,Q6AY61,Q6AYQ8                                                                              |
| 58 | 1,2,3,4,5,7<br>,33,38 | 6,8,34,35,<br>36,37,39,4<br>0  | 3  | P13432,P70549,Q6AYQ8                                                                                            |
| 59 | 1,2,3,4,5,7<br>,33,39 | 6,8,34,35,<br>36,37,38,4<br>0  | 2  | Q5RKI1,Q6AYQ8                                                                                                   |
| 60 | 1,2,3,4,5,7<br>,33,40 | 6,8,34,35,<br>36,37,38,3<br>9  | 1  | Q6AYQ8                                                                                                          |
| 61 | 1,2,3,4,5,7<br>,34,35 | 6,8,33,36,<br>37,38,39,4<br>0  | 10 | P19629,P36374,P47967,P51740,P70549,P97840,Q5I0D7,Q63474,Q9QWN8,Q9Z1F2                                           |

|    |                       |                               |                                                                          |
|----|-----------------------|-------------------------------|--------------------------------------------------------------------------|
| 62 | 1,2,3,4,5,7<br>,34,36 | 6,8,33,35,<br>37,38,39,4<br>0 | 9 P47967,P51740,P55091,P97840,Q5I0D7,Q68G31,Q8K4G9,Q9QWN8,Q9Z1F2         |
| 63 | 1,2,3,4,5,7<br>,34,37 | 6,8,33,35,<br>36,38,39,4<br>0 | 6 P47967,P51740,P97840,Q6AY61,Q6AYQ8,Q9JJ50                              |
| 64 | 1,2,3,4,5,7<br>,34,38 | 6,8,33,35,<br>36,37,39,4<br>0 | 10 P01946,P02091,P36374,P60905,P70549,P80299,Q4KLZ6,Q6AY61,Q6P6S4,Q9QWN8 |
| 65 | 1,2,3,4,5,7<br>,34,39 | 6,8,33,35,<br>36,37,38,4<br>0 | 9 P36374,P60905,P63029,P70549,Q68G31,Q6AY61,Q6AYQ8,Q8K4G9,Q9Z1F2         |
| 66 | 1,2,3,4,5,7<br>,34,40 | 6,8,33,35,<br>36,37,38,3<br>9 | 5 P36374,P70549,Q68G31,Q6AY61,Q9WUW8                                     |
| 67 | 1,2,3,4,5,7<br>,35,36 | 6,8,33,34,<br>37,38,39,4<br>0 | 9 P19132,P19218,P21674,P47967,P51740,P97840,Q5I0D1,Q5I0D7,Q9QWN8         |
| 68 | 1,2,3,4,5,7<br>,35,37 | 6,8,33,34,<br>36,38,39,4<br>0 | 5 P19132,P47967,P51740,P97840,Q5I0D1                                     |
| 69 | 1,2,3,4,5,7<br>,35,38 | 6,8,33,34,<br>36,37,39,4<br>0 | 7 P13432,P19218,P24368,P36374,P70549,Q6P6R2,Q9QWN8                       |
| 70 | 1,2,3,4,5,7<br>,35,39 | 6,8,33,34,<br>36,37,38,4<br>0 | 5 P12020,P30120,P36374,Q63474,Q9Z1F2                                     |
| 71 | 1,2,3,4,5,7<br>,35,40 | 6,8,33,34,<br>36,37,38,3<br>9 | 4 P02793;Q7TP54,P36374,Q6P6R2,Q9QWN8                                     |
| 72 | 1,2,3,4,5,7<br>,36,37 | 6,8,33,34,<br>35,38,39,4<br>0 | 6 P19132,P47967,P51740,P55091,P97840,Q5I0D1                              |
| 73 | 1,2,3,4,5,7<br>,36,38 | 6,8,33,34,<br>35,37,39,4<br>0 | 6 P13432,P19218,P47967,P97840,Q923V8,Q9QWN8                              |
| 74 | 1,2,3,4,5,7<br>,36,39 | 6,8,33,34,<br>35,37,38,4<br>0 | 5 P63029,P97840,Q8K4G9,Q9QWN8,Q9Z1F2                                     |

|    |                       |                               |                                                    |
|----|-----------------------|-------------------------------|----------------------------------------------------|
| 75 | 1,2,3,4,5,7<br>,36,40 | 6,8,33,34,<br>35,37,38,3<br>9 | 2 P97840,Q9QWN8                                    |
| 76 | 1,2,3,4,5,7<br>,37,38 | 6,8,33,34,<br>35,36,39,4<br>0 | 4 P22006,P47967,P97840,Q6AY61                      |
| 77 | 1,2,3,4,5,7<br>,37,39 | 6,8,33,34,<br>35,36,38,4<br>0 | 3 P63029,Q6AY61,Q6AYQ8                             |
| 78 | 1,2,3,4,5,7<br>,37,40 | 6,8,33,34,<br>35,36,38,3<br>9 | 2 P19132,Q6AY61                                    |
| 79 | 1,2,3,4,5,7<br>,38,39 | 6,8,33,34,<br>35,36,37,4<br>0 | 7 P02770,P13432,P24368,P36374,P60905,P70549,Q63556 |
| 80 | 1,2,3,4,5,7<br>,38,40 | 6,8,33,34,<br>35,36,37,3<br>9 | 5 P36374,Q6AY61,Q6P6R2,Q9QWN8,Q9QX74               |
| 81 | 1,2,3,4,5,7<br>,39,40 | 6,8,33,34,<br>35,36,37,3<br>8 | 3 O89117,P36374,Q6AYQ8                             |
| 82 | 1,2,3,4,5,8<br>,33,34 | 6,7,35,36,<br>37,38,39,4<br>0 | 7 G3V686,P51740,P70549,Q30KJ2,Q5I0D7,Q63475,Q6IG05 |
| 83 | 1,2,3,4,5,8<br>,33,35 | 6,7,34,36,<br>37,38,39,4<br>0 | 7 P01681,P19629,P36376,P51740,Q09030,Q63475,Q6DGG1 |
| 84 | 1,2,3,4,5,8<br>,33,36 | 6,7,34,35,<br>37,38,39,4<br>0 | 5 O54728,P01681,P51740,Q09030,Q63475               |
| 85 | 1,2,3,4,5,8<br>,33,37 | 6,7,34,35,<br>36,38,39,4<br>0 | 5 P51740,Q00657,Q63475,Q6AYQ8,Q6IFW6               |
| 86 | 1,2,3,4,5,8<br>,33,38 | 6,7,34,35,<br>36,37,39,4<br>0 | 7 P36376,P70549,Q63475,Q6IFU7,Q6IFW6,Q6IG05,Q6P6Q2 |
| 87 | 1,2,3,4,5,8<br>,33,39 | 6,7,34,35,<br>36,37,38,4<br>0 | 5 P01681,P23593,P36376,Q63475,Q6AYQ8               |

|     |                       |                               |    |                                                                                                          |
|-----|-----------------------|-------------------------------|----|----------------------------------------------------------------------------------------------------------|
| 88  | 1,2,3,4,5,8<br>,33,40 | 6,7,34,35,<br>36,37,38,3<br>9 | 4  | P00731,P01681,P36376,Q63475                                                                              |
| 89  | 1,2,3,4,5,8<br>,34,35 | 6,7,33,36,<br>37,38,39,4<br>0 | 9  | P19629,P36374,P36376,P36860,P51740,P70549,P97580,Q30KJ2,Q5I0D7                                           |
| 90  | 1,2,3,4,5,8<br>,34,36 | 6,7,33,35,<br>37,38,39,4<br>0 | 8  | G3V686,P51740,P55091,P97615,Q30KJ2,Q5I0D7,Q8K4G9,Q9Z1F2                                                  |
| 91  | 1,2,3,4,5,8<br>,34,37 | 6,7,33,35,<br>36,38,39,4<br>0 | 6  | P51740,Q30KJ2,Q6IFW6,Q6IG02,Q6IG05,Q6IMF3                                                                |
| 92  | 1,2,3,4,5,8<br>,34,38 | 6,7,33,35,<br>36,37,39,4<br>0 | 15 | B1H234,P01946,P02091,P36374,P36376,P70549,P97580,Q30KJ2,Q4KLZ6,Q6IFU7,Q6IFU8,Q6IFW6,Q6IG05,Q6IMF3,Q6P6Q2 |
| 93  | 1,2,3,4,5,8<br>,34,39 | 6,7,33,35,<br>36,37,38,4<br>0 | 9  | P20762,P36376,P70549,P97580,Q30KJ2,Q6IFW6,Q8K4G9,Q9Z0V6,Q9Z1F2                                           |
| 94  | 1,2,3,4,5,8<br>,34,40 | 6,7,33,35,<br>36,37,38,3<br>9 | 5  | P15399,P36374,P36376,P97580,Q30KJ2                                                                       |
| 95  | 1,2,3,4,5,8<br>,35,36 | 6,7,33,34,<br>37,38,39,4<br>0 | 5  | P19218,P21674,P36376,P51740,Q6DGG1                                                                       |
| 96  | 1,2,3,4,5,8<br>,35,37 | 6,7,33,34,<br>36,38,39,4<br>0 | 7  | F1M3L7,P19218,P36860,P51740,P82471,Q00657,Q6DGG1                                                         |
| 97  | 1,2,3,4,5,8<br>,35,38 | 6,7,33,34,<br>36,37,39,4<br>0 | 6  | P19218,P24368,P36374,P36376,Q6DGG1,Q6IG05                                                                |
| 98  | 1,2,3,4,5,8<br>,35,39 | 6,7,33,34,<br>36,37,38,4<br>0 | 5  | P20762,P23593,P36374,P36376,P36860                                                                       |
| 99  | 1,2,3,4,5,8<br>,35,40 | 6,7,33,34,<br>36,37,38,3<br>9 | 4  | P36374,P36376,P82471,Q6DGG1                                                                              |
| 100 | 1,2,3,4,5,8<br>,36,37 | 6,7,33,34,<br>35,38,39,4<br>0 | 7  | F1M3L7,P47967,P51740,P55091,P97840,Q00657,Q6DGG1                                                         |

|     |                        |                               |                                                                                        |
|-----|------------------------|-------------------------------|----------------------------------------------------------------------------------------|
| 101 | 1,2,3,4,5,8<br>,36,38  | 6,7,33,34,<br>35,37,39,4<br>0 | 2 P19218,Q6IG05                                                                        |
| 102 | 1,2,3,4,5,8<br>,36,39  | 6,7,33,34,<br>35,37,38,4<br>0 | 5 P20762,P36376,Q8K4G9,Q9R168,Q9Z1F2                                                   |
| 103 | 1,2,3,4,5,8<br>,36,40  | 6,7,33,34,<br>35,37,38,3<br>9 | 2 P36376,P82471                                                                        |
| 104 | 1,2,3,4,5,8<br>,37,38  | 6,7,33,34,<br>35,36,39,4<br>0 | 10 P19218,P22006,Q4FZU2,Q6DGG1,Q6IFU8,Q6IFW6,Q6IG02,Q6IG05,Q6IMF3,Q6P6Q2               |
| 105 | 1,2,3,4,5,8<br>,37,39  | 6,7,33,34,<br>35,36,38,4<br>0 | 8 P20762,P23593,P36376,P63029,P82471,Q6AYQ8,Q6IFW6,Q6IG02                              |
| 106 | 1,2,3,4,5,8<br>,37,40  | 6,7,33,34,<br>35,36,38,3<br>9 | 3 P22006,P82471,Q6IFW6                                                                 |
| 107 | 1,2,3,4,5,8<br>,38,39  | 6,7,33,34,<br>35,36,37,4<br>0 | 7 P20762,P36374,P36376,P70549,Q6IFW6,Q6P6Q2,Q6PCU2                                     |
| 108 | 1,2,3,4,5,8<br>,38,40  | 6,7,33,34,<br>35,36,37,3<br>9 | 8 P22006,P36374,P36376,P82471,Q6IFW6,Q6IG05,Q6P6Q2,Q6P6R2                              |
| 109 | 1,2,3,4,5,8<br>,39,40  | 6,7,33,34,<br>35,36,37,3<br>8 | 5 P20762,P23593,P36376,P82471,Q9R168                                                   |
| 110 | 1,2,3,4,5,3<br>3,34,35 | 6,7,8,36,3<br>7,38,39,40      | 10 P06911,P12020,P19629,P35745,P51740,Q5GRG2,Q5I0D7,Q63475,Q812E4,Q9ZZL0               |
| 111 | 1,2,3,4,5,3<br>3,34,36 | 6,7,8,35,3<br>7,38,39,40      | 12 G3V686,P08721,P19939,P35745,P51740,P97584,P98089,Q5I0D7,Q5QE79,Q62635,Q63475,Q99041 |
| 112 | 1,2,3,4,5,3<br>3,34,37 | 6,7,8,35,3<br>6,38,39,40      | 5 P35745,P51740,P98089,Q5I0D7,Q6AYQ8                                                   |
| 113 | 1,2,3,4,5,3<br>3,34,38 | 6,7,8,35,3<br>6,37,39,40      | 8 P01946,P02091,P35745,P70549,P80299,Q4KLZ6,Q63475,Q812E4                              |
| 114 | 1,2,3,4,5,3<br>3,34,39 | 6,7,8,35,3<br>6,37,38,40      | 3 P35745,Q6AYQ8,Q99041                                                                 |
| 115 | 1,2,3,4,5,3<br>3,34,40 | 6,7,8,35,3<br>6,37,38,39      | 2 P35745,Q63475                                                                        |
| 116 | 1,2,3,4,5,3<br>3,35,36 | 6,7,8,34,3<br>7,38,39,40      | 7 P01681,P21674,P35745,P49134,P51740,P97840,Q5I0D7                                     |

|     |                        |                          |                                                           |
|-----|------------------------|--------------------------|-----------------------------------------------------------|
| 117 | 1,2,3,4,5,3<br>3,35,37 | 6,7,8,34,3<br>6,38,39,40 | 2 F1M3L7,P51740                                           |
| 118 | 1,2,3,4,5,3<br>3,35,38 | 6,7,8,34,3<br>6,37,39,40 | 5 P12020,P13432,P19629,Q6P6R2,Q812E4                      |
| 119 | 1,2,3,4,5,3<br>3,35,39 | 6,7,8,34,3<br>6,37,38,40 | 2 P12020,P62804                                           |
| 120 | 1,2,3,4,5,3<br>3,35,40 | 6,7,8,34,3<br>6,37,38,39 | 4 P01681,P12020,P35745,Q6P6R2                             |
| 121 | 1,2,3,4,5,3<br>3,36,37 | 6,7,8,34,3<br>5,38,39,40 | 6 P47967,P51740,P55091,P97840,P98089,Q05695               |
| 122 | 1,2,3,4,5,3<br>3,36,38 | 6,7,8,34,3<br>5,37,39,40 | 3 P01681,P35745,Q923V8                                    |
| 123 | 1,2,3,4,5,3<br>3,36,39 | 6,7,8,34,3<br>5,37,38,40 | 2 P01681,Q99041                                           |
| 124 | 1,2,3,4,5,3<br>3,36,40 | 6,7,8,34,3<br>5,37,38,39 | 2 P01681,P35745                                           |
| 125 | 1,2,3,4,5,3<br>3,37,38 | 6,7,8,34,3<br>5,36,39,40 | 0                                                         |
| 126 | 1,2,3,4,5,3<br>3,37,39 | 6,7,8,34,3<br>5,36,38,40 | 1 Q6AYQ8                                                  |
| 127 | 1,2,3,4,5,3<br>3,37,40 | 6,7,8,34,3<br>5,36,38,39 | 0                                                         |
| 128 | 1,2,3,4,5,3<br>3,38,39 | 6,7,8,34,3<br>5,36,37,40 | 1 Q9QW07                                                  |
| 129 | 1,2,3,4,5,3<br>3,38,40 | 6,7,8,34,3<br>5,36,37,39 | 3 P01039,P35745,Q6P6R2                                    |
| 130 | 1,2,3,4,5,3<br>3,39,40 | 6,7,8,34,3<br>5,36,37,38 | 2 P35745,Q6AYQ8                                           |
| 131 | 1,2,3,4,5,3<br>4,35,36 | 6,7,8,33,3<br>7,38,39,40 | 5 P21674,P51740,P97840,Q5I0D7,Q9QWN8                      |
| 132 | 1,2,3,4,5,3<br>4,35,37 | 6,7,8,33,3<br>6,38,39,40 | 2 P50115,P51740                                           |
| 133 | 1,2,3,4,5,3<br>4,35,38 | 6,7,8,33,3<br>6,37,39,40 | 8 P01946,P08723,P21674,P70549,Q4KLZ6,Q4TU93,Q812E4,Q9QWN8 |
| 134 | 1,2,3,4,5,3<br>4,35,39 | 6,7,8,33,3<br>6,37,38,40 | 4 P08723,P09456,P12020,P30120                             |
| 135 | 1,2,3,4,5,3<br>4,35,40 | 6,7,8,33,3<br>6,37,38,39 | 0                                                         |
| 136 | 1,2,3,4,5,3<br>4,36,37 | 6,7,8,33,3<br>5,38,39,40 | 8 P47967,P51740,P55091,P97840,P98089,Q05695,Q4KLZ6,Q62635 |

|     |                        |                          |    |                                                                       |
|-----|------------------------|--------------------------|----|-----------------------------------------------------------------------|
| 137 | 1,2,3,4,5,3<br>4,36,38 | 6,7,8,33,3<br>5,37,39,40 | 5  | P01946,P02091,P21674,Q4KLZ6,Q9QWN8                                    |
| 138 | 1,2,3,4,5,3<br>4,36,39 | 6,7,8,33,3<br>5,37,38,40 | 2  | Q8K4G9,Q9Z1F2                                                         |
| 139 | 1,2,3,4,5,3<br>4,36,40 | 6,7,8,33,3<br>5,37,38,39 | 1  | Q4KLZ6                                                                |
| 140 | 1,2,3,4,5,3<br>4,37,38 | 6,7,8,33,3<br>5,36,39,40 | 5  | P01946,P02091,Q4KLZ6,Q6AY61,Q6IG02                                    |
| 141 | 1,2,3,4,5,3<br>4,37,39 | 6,7,8,33,3<br>5,36,38,40 | 1  | Q6AYQ8                                                                |
| 142 | 1,2,3,4,5,3<br>4,37,40 | 6,7,8,33,3<br>5,36,38,39 | 1  | Q4KLZ6                                                                |
| 143 | 1,2,3,4,5,3<br>4,38,39 | 6,7,8,33,3<br>5,36,37,40 | 7  | P01946,P02091,P08723,P60905,P70549,Q4KLZ6,Q9QW07                      |
| 144 | 1,2,3,4,5,3<br>4,38,40 | 6,7,8,33,3<br>5,36,37,39 | 6  | P01946,P08723,P70549,P97580,Q4KLZ6,Q6P6R2                             |
| 145 | 1,2,3,4,5,3<br>4,39,40 | 6,7,8,33,3<br>5,36,37,38 | 1  | P08723                                                                |
| 146 | 1,2,3,4,5,3<br>5,36,37 | 6,7,8,33,3<br>4,38,39,40 | 7  | F1M3L7,P19132,P21674,P47967,P51740,P55091,P97840                      |
| 147 | 1,2,3,4,5,3<br>5,36,38 | 6,7,8,33,3<br>4,37,39,40 | 5  | P19218,P21674,P24368,Q9QW07,Q9QWN8                                    |
| 148 | 1,2,3,4,5,3<br>5,36,39 | 6,7,8,33,3<br>4,37,38,40 | 4  | P23739,P30120,Q62714,Q9QW07                                           |
| 149 | 1,2,3,4,5,3<br>5,36,40 | 6,7,8,33,3<br>4,37,38,39 | 3  | P02793;Q7TP54,P21674,P53792                                           |
| 150 | 1,2,3,4,5,3<br>5,37,38 | 6,7,8,33,3<br>4,36,39,40 | 2  | P19218,Q9QX74                                                         |
| 151 | 1,2,3,4,5,3<br>5,37,39 | 6,7,8,33,3<br>4,36,38,40 | 0  |                                                                       |
| 152 | 1,2,3,4,5,3<br>5,37,40 | 6,7,8,33,3<br>4,36,38,39 | 4  | P19132,P50115,P82471,Q9QX74                                           |
| 153 | 1,2,3,4,5,3<br>5,38,39 | 6,7,8,33,3<br>4,36,37,40 | 10 | P08723,P09456,P13432,P24368,P30120,P47727,P62898,Q6P6R2,Q9QW07,Q9QX74 |
| 154 | 1,2,3,4,5,3<br>5,38,40 | 6,7,8,33,3<br>4,36,37,39 | 3  | P08723,Q6P6R2,Q9QX74                                                  |
| 155 | 1,2,3,4,5,3<br>5,39,40 | 6,7,8,33,3<br>4,36,37,38 | 4  | P00774,P08723,Q6P6R2,Q9QX74                                           |
| 156 | 1,2,3,4,5,3<br>6,37,38 | 6,7,8,33,3<br>4,35,39,40 | 3  | P97840,Q4KLZ6,Q9QX74                                                  |

|     |                        |                                |                                                                                                                                                                                |
|-----|------------------------|--------------------------------|--------------------------------------------------------------------------------------------------------------------------------------------------------------------------------|
| 157 | 1,2,3,4,5,3<br>6,37,39 | 6,7,8,33,3<br>4,35,38,40       | 0                                                                                                                                                                              |
| 158 | 1,2,3,4,5,3<br>6,37,40 | 6,7,8,33,3<br>4,35,38,39       | 3 P82471,Q4KLZ6,Q9QX74                                                                                                                                                         |
| 159 | 1,2,3,4,5,3<br>6,38,39 | 6,7,8,33,3<br>4,35,37,40       | 3 P24368,Q9QW07,Q9QX74                                                                                                                                                         |
| 160 | 1,2,3,4,5,3<br>6,38,40 | 6,7,8,33,3<br>4,35,37,39       | 3 Q4KLZ6,Q9QWN8,Q9QX74                                                                                                                                                         |
| 161 | 1,2,3,4,5,3<br>6,39,40 | 6,7,8,33,3<br>4,35,37,38       | 1 Q9QX74                                                                                                                                                                       |
| 162 | 1,2,3,4,5,3<br>7,38,39 | 6,7,8,33,3<br>4,35,36,40       | 1 Q9QX74                                                                                                                                                                       |
| 163 | 1,2,3,4,5,3<br>7,38,40 | 6,7,8,33,3<br>4,35,36,39       | 3 P82471,Q4KLZ6,Q9QX74                                                                                                                                                         |
| 164 | 1,2,3,4,5,3<br>7,39,40 | 6,7,8,33,3<br>4,35,36,38       | 3 O89117,P82471,Q9QX74                                                                                                                                                         |
| 165 | 1,2,3,4,5,3<br>8,39,40 | 6,7,8,33,3<br>4,35,36,37       | 4 O89117,P08723,Q6P6R2,Q9QX74                                                                                                                                                  |
| 166 | 1,2,3,4,6,7<br>,8,33   | 5,34,35,36<br>,37,38,39,<br>40 | 21 G3V686,O54800;Q5DWV2,O54858,P02454,P02631,P0C0K7,P11598,P23593,P42854,P80202,P85971,Q05702,Q09030,Q4AEF8,Q4V885,Q63475,Q6AYQ8,Q91XN4,Q99PP0,Q9QW30,Q9QZQ5                   |
| 167 | 1,2,3,4,6,7<br>,8,34   | 5,33,35,36<br>,37,38,39,<br>40 | G3V686,O54800;Q5DWV2,O54858,P02631,P0C0K7,P11598,P20762,P20766,P33436,P36374,P42854,P80202,P85971,P97580,P97615,Q05702,Q09030,Q30KJ2,Q4AEF8,Q63475,Q91XN4,Q99PP0,Q9QW30,Q9Z1F2 |
| 168 | 1,2,3,4,6,7<br>,8,35   | 5,33,34,36<br>,37,38,39,<br>40 | 15 O54858,P19132,P19218,P23593,P36374,P36860,P42854,P80202,P85971,Q09030,Q4AEF8,Q5PPH0,Q63149,Q91XN4,Q9Z1F2                                                                    |
| 169 | 1,2,3,4,6,7<br>,8,36   | 5,33,34,35<br>,37,38,39,<br>40 | 16 P09656,P0C0K7,P11598,P19218,P42854,P80202,P85971,P97615,Q05702,Q09030,Q4AEF8,Q63617,Q91XN4,Q99PP0,Q9QZQ5,Q9Z1F2                                                             |
| 170 | 1,2,3,4,6,7<br>,8,37   | 5,33,34,35<br>,36,38,39,<br>40 | 14 P02631,P0C0A9,P0C0K7,P11598,P19132,P22273,P23593,P85971,Q05702,Q09030,Q4AEF8,Q63617,Q91XN4,Q99041                                                                           |
| 171 | 1,2,3,4,6,7<br>,8,38   | 5,33,34,35<br>,36,37,39,<br>40 | 11 O70417,O88339;Q4V882,P19218,P35280,P36374,P42854,P85971,Q05702,Q09030,Q4AEF8,Q91XN4                                                                                         |
| 172 | 1,2,3,4,6,7<br>,8,39   | 5,33,34,35<br>,36,37,38,<br>40 | 16 P20762,P20766,P23593,P36374,P36376,P42854,P63029,P80202,P85971,Q05702,Q09030,Q4AEF8,Q6AYQ8,Q91XN4,Q99PP0,Q9Z1F2                                                             |



|     |                       |                                |    |                                                                                                                            |
|-----|-----------------------|--------------------------------|----|----------------------------------------------------------------------------------------------------------------------------|
| 173 | 1,2,3,4,6,7<br>,8,40  | 5,33,34,35<br>,36,37,38,<br>39 | 13 | O54858,P02454,P02631,P23593,P36374,P42854,P80202,P85971,Q05702,Q09030,Q4AEF8,Q91X<br>N4,Q99PP0                             |
| 174 | 1,2,3,4,6,7<br>,33,34 | 5,8,35,36,<br>37,38,39,4<br>0  | 16 | G3V686,O54800;Q5DWV2,P08721,P35745,P42854,P80299,Q09030,Q4AEF8,Q4V885,Q5I0D7,Q<br>63475,Q6AYQ8,Q8K1G0,Q91XN4,Q99PP0,Q9QW30 |
| 175 | 1,2,3,4,6,7<br>,33,35 | 5,8,34,36,<br>37,38,39,4<br>0  | 10 | O54800;Q5DWV2,P08721,P42854,Q09030,Q4AEF8,Q5I0D7,Q5PPH0,Q63149,Q63475,Q99PP0                                               |
| 176 | 1,2,3,4,6,7<br>,33,36 | 5,8,34,35,<br>37,38,39,4<br>0  | 11 | O54800;Q5DWV2,P08721,P09656,P35745,P42854,P97615,Q09030,Q4AEF8,Q5I0D7,Q91XN4,Q<br>99PP0                                    |
| 177 | 1,2,3,4,6,7<br>,33,37 | 5,8,34,35,<br>36,38,39,4<br>0  | 6  | O54800;Q5DWV2,P11598,Q09030,Q4AEF8,Q6AYQ8,Q91XN4                                                                           |
| 178 | 1,2,3,4,6,7<br>,33,38 | 5,8,34,35,<br>36,37,39,4<br>0  | 6  | O54800;Q5DWV2,Q09030,Q4AEF8,Q63475,Q91XN4,Q99PP0                                                                           |
| 179 | 1,2,3,4,6,7<br>,33,39 | 5,8,34,35,<br>36,37,38,4<br>0  | 7  | O54800;Q5DWV2,P42854,Q09030,Q4AEF8,Q5RKI1,Q6AYQ8,Q99PP0                                                                    |
| 180 | 1,2,3,4,6,7<br>,33,40 | 5,8,34,35,<br>36,37,38,3<br>9  | 10 | O54800;Q5DWV2,P06760,P35745,P42854,Q09030,Q4AEF8,Q63475,Q6AYQ8,Q91XN4,Q99PP0                                               |
| 181 | 1,2,3,4,6,7<br>,34,35 | 5,8,33,36,<br>37,38,39,4<br>0  | 8  | O54800;Q5DWV2,P36374,P42854,Q4AEF8,Q5I0D7,Q80WL1,Q9QWN8,Q9Z1F2                                                             |
| 182 | 1,2,3,4,6,7<br>,34,36 | 5,8,33,35,<br>37,38,39,4<br>0  | 11 | G3V686,P11598,P42854,P80299,P97615,Q5I0D7,Q80WL1,Q91XN4,Q99PP0,Q9QWN8,Q9Z1F2                                               |
| 183 | 1,2,3,4,6,7<br>,34,37 | 5,8,33,35,<br>36,38,39,4<br>0  | 7  | O54800;Q5DWV2,P01835,P11598,P19132,P33436,Q6AYQ8,Q80WL1                                                                    |
| 184 | 1,2,3,4,6,7<br>,34,38 | 5,8,33,35,<br>36,37,39,4<br>0  | 8  | O54800;Q5DWV2,P01946,P02091,P36374,P80299,Q4KLZ6,Q80WL1,Q9QWN8                                                             |
| 185 | 1,2,3,4,6,7<br>,34,39 | 5,8,33,35,<br>36,37,38,4<br>0  | 6  | P20766,Q4AEF8,Q6AYQ8,Q80WL1,Q9QX79,Q9Z1F2                                                                                  |

|     |                       |                               |                                                                  |
|-----|-----------------------|-------------------------------|------------------------------------------------------------------|
| 186 | 1,2,3,4,6,7<br>,34,40 | 5,8,33,35,<br>36,37,38,3<br>9 | 4 P42854,P97580,Q80WL1,Q91XN4                                    |
| 187 | 1,2,3,4,6,7<br>,35,36 | 5,8,33,34,<br>37,38,39,4<br>0 | 7 P02793;Q7TP54,P09656,P19132,P19218,Q4AEF8,Q9QWN8,Q9Z1F2        |
| 188 | 1,2,3,4,6,7<br>,35,37 | 5,8,33,34,<br>36,38,39,4<br>0 | 3 P19132,Q4AEF8,Q5PPH0                                           |
| 189 | 1,2,3,4,6,7<br>,35,38 | 5,8,33,34,<br>36,37,39,4<br>0 | 7 P06760,P13432,P19218,P36374,Q4AEF8,Q63149,Q9QWN8               |
| 190 | 1,2,3,4,6,7<br>,35,39 | 5,8,33,34,<br>36,37,38,4<br>0 | 7 P06760,P23593,P36374,Q4AEF8,Q5PPH0,Q63149,Q9Z1F2               |
| 191 | 1,2,3,4,6,7<br>,35,40 | 5,8,33,34,<br>36,37,38,3<br>9 | 6 P02793;Q7TP54,P06760,P19132,P36374,Q4AEF8,Q63149               |
| 192 | 1,2,3,4,6,7<br>,36,37 | 5,8,33,34,<br>35,38,39,4<br>0 | 9 P01835,P09656,P11598,P19132,P47967,P97840,Q4AEF8,Q63617,Q8CJD3 |
| 193 | 1,2,3,4,6,7<br>,36,38 | 5,8,33,34,<br>35,37,39,4<br>0 | 3 P09656,P19218,Q9QWN8                                           |
| 194 | 1,2,3,4,6,7<br>,36,39 | 5,8,33,34,<br>35,37,38,4<br>0 | 3 P09656,Q4AEF8,Q9Z1F2                                           |
| 195 | 1,2,3,4,6,7<br>,36,40 | 5,8,33,34,<br>35,37,38,3<br>9 | 7 P02793;Q7TP54,P06760,P09656,P19132,P42854,Q91XN4,Q9QWN8        |
| 196 | 1,2,3,4,6,7<br>,37,38 | 5,8,33,34,<br>35,36,39,4<br>0 | 4 P01835,P23739,Q4AEF8,Q9QX74                                    |
| 197 | 1,2,3,4,6,7<br>,37,39 | 5,8,33,34,<br>35,36,38,4<br>0 | 4 P01835,P63029,Q4AEF8,Q6AYQ8                                    |
| 198 | 1,2,3,4,6,7<br>,37,40 | 5,8,33,34,<br>35,36,38,3<br>9 | 6 P01835,P11598,P19132,P82471,Q4AEF8,Q9QX74                      |

|     |                       |                               |    |                                                                                                                                                           |
|-----|-----------------------|-------------------------------|----|-----------------------------------------------------------------------------------------------------------------------------------------------------------|
| 199 | 1,2,3,4,6,7<br>,38,39 | 5,8,33,34,<br>35,36,37,4<br>0 | 6  | P02770,P06760,P13432,P36374,Q4AEF8,Q9QX79                                                                                                                 |
| 200 | 1,2,3,4,6,7<br>,38,40 | 5,8,33,34,<br>35,36,37,3<br>9 | 4  | P06760,P36374,Q6P6R2,Q9QX74                                                                                                                               |
| 201 | 1,2,3,4,6,7<br>,39,40 | 5,8,33,34,<br>35,36,37,3<br>8 | 3  | P06760,Q4AEF8,Q6AYQ8                                                                                                                                      |
| 202 | 1,2,3,4,6,8<br>,33,34 | 5,7,35,36,<br>37,38,39,4<br>0 | 21 | G3V686,O54800;Q5DWV2,O55004,P08649,P35745,P42854,P80202,P85971,P97580,P97615,Q05702,Q09030,Q30KJ2,Q4V885,Q5I0D7,Q63475,Q64240,Q91XN4,Q99MH3,Q99PP0,Q9QZQ5 |
| 203 | 1,2,3,4,6,8<br>,33,35 | 5,7,34,36,<br>37,38,39,4<br>0 | 13 | O54800;Q5DWV2,P23593,P42854,P80202,P85971,Q05702,Q09030,Q4V885,Q5PPH0,Q63149,Q63475,Q91XN4,Q99PP0                                                         |
| 204 | 1,2,3,4,6,8<br>,33,36 | 5,7,34,35,<br>37,38,39,4<br>0 | 18 | G3V686,O54728,O54800;Q5DWV2,P01681,P08649,P09656,P42854,P80202,P85971,P97615,Q05702,Q09030,Q4V885,Q63475,Q91XN4,Q99MH3,Q99PP0,Q9QZQ5                      |
| 205 | 1,2,3,4,6,8<br>,33,37 | 5,7,34,35,<br>36,38,39,4<br>0 | 8  | O54800;Q5DWV2,P23593,P85971,Q05702,Q09030,Q63475,Q91XN4,Q99PP0                                                                                            |
| 206 | 1,2,3,4,6,8<br>,33,38 | 5,7,34,35,<br>36,37,39,4<br>0 | 11 | O54800;Q5DWV2,O70417,P42854,P80202,P85971,Q05702,Q09030,Q63475,Q6IG05,Q91XN4,Q99PP0                                                                       |
| 207 | 1,2,3,4,6,8<br>,33,39 | 5,7,34,35,<br>36,37,38,4<br>0 | 14 | O54800;Q5DWV2,P23593,P36376,P42854,P80202,P85971,Q05702,Q09030,Q63475,Q63514,Q6AYQ8,Q91XN4,Q99MH3,Q99PP0                                                  |
| 208 | 1,2,3,4,6,8<br>,33,40 | 5,7,34,35,<br>36,37,38,3<br>9 | 9  | O54800;Q5DWV2,P42854,P80202,P85971,Q05702,Q09030,Q63475,Q91XN4,Q99PP0                                                                                     |
| 209 | 1,2,3,4,6,8<br>,34,35 | 5,7,33,36,<br>37,38,39,4<br>0 | 8  | P36374,P36860,P42854,P85971,P97580,Q05702,Q30KJ2,Q5PPH0                                                                                                   |
| 210 | 1,2,3,4,6,8<br>,34,36 | 5,7,33,35,<br>37,38,39,4<br>0 | 12 | G3V686,P08649,P42854,P97580,P97615,Q05702,Q09030,Q30KJ2,Q5I0D7,Q91XN4,Q99PP0,Q9Z1F2                                                                       |
| 211 | 1,2,3,4,6,8<br>,34,37 | 5,7,33,35,<br>36,38,39,4<br>0 | 5  | P33436,P97580,Q05702,Q30KJ2,Q91XN4                                                                                                                        |

|     |                       |                               |    |                                                                                                |
|-----|-----------------------|-------------------------------|----|------------------------------------------------------------------------------------------------|
| 212 | 1,2,3,4,6,8<br>,34,38 | 5,7,33,35,<br>36,37,39,4<br>0 | 12 | O54800;Q5DWV2,P01946,P02091,P02625,P15399,P36374,P97580,Q05702,Q30KJ2,Q4KLZ6,Q6I<br>G05,Q91XN4 |
| 213 | 1,2,3,4,6,8<br>,34,39 | 5,7,33,35,<br>36,37,38,4<br>0 | 9  | P15399,P20762,P36376,P42854,P97580,Q05702,Q30KJ2,Q63514,Q9Z1F2                                 |
| 214 | 1,2,3,4,6,8<br>,34,40 | 5,7,33,35,<br>36,37,38,3<br>9 | 7  | P15399,P42854,P80202,P97580,Q05702,Q30KJ2,Q91XN4                                               |
| 215 | 1,2,3,4,6,8<br>,35,36 | 5,7,33,34,<br>37,38,39,4<br>0 | 7  | P09656,P19132,P19218,P42854,P85971,Q09030,Q5PPH0                                               |
| 216 | 1,2,3,4,6,8<br>,35,37 | 5,7,33,34,<br>36,38,39,4<br>0 | 7  | P19132,P19218,P23593,P36860,P82471,P85971,Q5PPH0                                               |
| 217 | 1,2,3,4,6,8<br>,35,38 | 5,7,33,34,<br>36,37,39,4<br>0 | 5  | O70417,P19218,P36374,P85971,Q63149                                                             |
| 218 | 1,2,3,4,6,8<br>,35,39 | 5,7,33,34,<br>36,37,38,4<br>0 | 10 | P20762,P23593,P36374,P36376,P36860,P54921,P85971,Q5PPH0,Q63149,Q9Z1F2                          |
| 219 | 1,2,3,4,6,8<br>,35,40 | 5,7,33,34,<br>36,37,38,3<br>9 | 10 | P02793;Q7TP54,P06760,P23593,P36374,P42854,P54921,P82471,P85971,Q5PPH0,Q63149                   |
| 220 | 1,2,3,4,6,8<br>,36,37 | 5,7,33,34,<br>35,38,39,4<br>0 | 7  | P09656,P19132,P82471,Q05702,Q09030,Q91XN4,Q9JI85                                               |
| 221 | 1,2,3,4,6,8<br>,36,38 | 5,7,33,34,<br>35,37,39,4<br>0 | 5  | O70417,P09656,P19218,Q09030,Q91XN4                                                             |
| 222 | 1,2,3,4,6,8<br>,36,39 | 5,7,33,34,<br>35,37,38,4<br>0 | 9  | P08649,P09656,P36376,P85971,P97615,Q05702,Q09030,Q63514,Q9Z1F2                                 |
| 223 | 1,2,3,4,6,8<br>,36,40 | 5,7,33,34,<br>35,37,38,3<br>9 | 7  | P09656,P42854,P82471,P97615,Q05702,Q09030,Q91XN4                                               |
| 224 | 1,2,3,4,6,8<br>,37,38 | 5,7,33,34,<br>35,36,39,4<br>0 | 2  | P19218,Q05702                                                                                  |

|     |                        |                               |    |                                                                                                                                                           |
|-----|------------------------|-------------------------------|----|-----------------------------------------------------------------------------------------------------------------------------------------------------------|
| 225 | 1,2,3,4,6,8<br>,37,39  | 5,7,33,34,<br>35,36,38,4<br>0 | 4  | P23593,P36376,P82471,Q05702                                                                                                                               |
| 226 | 1,2,3,4,6,8<br>,37,40  | 5,7,33,34,<br>35,36,38,3<br>9 | 3  | P19132,P82471,Q05702                                                                                                                                      |
| 227 | 1,2,3,4,6,8<br>,38,39  | 5,7,33,34,<br>35,36,37,4<br>0 | 3  | P20762,P36374,P36376                                                                                                                                      |
| 228 | 1,2,3,4,6,8<br>,38,40  | 5,7,33,34,<br>35,36,37,3<br>9 | 5  | P06760,P36374,P82471,P97580,Q91XN4                                                                                                                        |
| 229 | 1,2,3,4,6,8<br>,39,40  | 5,7,33,34,<br>35,36,37,3<br>8 | 8  | P06760,P20762,P23593,P36376,P54921,P82471,P85971,Q9R168                                                                                                   |
| 230 | 1,2,3,4,6,3<br>3,34,35 | 5,7,8,36,3<br>7,38,39,40      | 12 | D3ZUC6,O54800;Q5DWW2,P08721,P35745,P42854,P80020,P80299,Q09030,Q5I0D7,Q5PPH0,Q63475,Q8K1G0                                                                |
| 231 | 1,2,3,4,6,3<br>3,34,36 | 5,7,8,35,3<br>7,38,39,40      | 21 | D3ZUC6,G3V686,O54800;Q5DWW2,O55145,P08494,P08649,P08721,P09656,P11883,P35745,P42854,P80299,P97584,P97615,Q09030,Q5I0D7,Q63475,Q8K1G0,Q91XN4,Q99MH3,Q99PP0 |
| 232 | 1,2,3,4,6,3<br>3,34,37 | 5,7,8,35,3<br>6,38,39,40      | 8  | O54800;Q5DWW2,O55145,P35745,P80020,Q5I0D7,Q63475,Q6AYQ8,Q8K1G0                                                                                            |
| 233 | 1,2,3,4,6,3<br>3,34,38 | 5,7,8,35,3<br>6,37,39,40      | 8  | O54800;Q5DWW2,P01946,P02091,P35745,P80299,Q4KLZ6,Q63475,Q8K1G0                                                                                            |
| 234 | 1,2,3,4,6,3<br>3,34,39 | 5,7,8,35,3<br>6,37,38,40      | 8  | O54800;Q5DWW2,P35745,P80299,Q63475,Q63514,Q6AYQ8,Q8K1G0,Q99MH3                                                                                            |
| 235 | 1,2,3,4,6,3<br>3,34,40 | 5,7,8,35,3<br>6,37,38,39      | 7  | O54800;Q5DWW2,P35745,P42854,P97580,Q63475,Q8K1G0,Q91XN4                                                                                                   |
| 236 | 1,2,3,4,6,3<br>3,35,36 | 5,7,8,34,3<br>7,38,39,40      | 10 | O54800;Q5DWW2,P06760,P08721,P09656,P11762,P35745,P49134,Q09030,Q5I0D7,Q5PPH0                                                                              |
| 237 | 1,2,3,4,6,3<br>3,35,37 | 5,7,8,34,3<br>6,38,39,40      | 2  | O54800;Q5DWW2,Q5PPH0                                                                                                                                      |
| 238 | 1,2,3,4,6,3<br>3,35,38 | 5,7,8,34,3<br>6,37,39,40      | 4  | O54800;Q5DWW2,P06760,P49134,Q5PPH0                                                                                                                        |
| 239 | 1,2,3,4,6,3<br>3,35,39 | 5,7,8,34,3<br>6,37,38,40      | 5  | O54800;Q5DWW2,P06760,P49134,P62804,Q5PPH0                                                                                                                 |
| 240 | 1,2,3,4,6,3<br>3,35,40 | 5,7,8,34,3<br>6,37,38,39      | 4  | O54800;Q5DWW2,P06760,P35745,Q5PPH0                                                                                                                        |
| 241 | 1,2,3,4,6,3<br>3,36,37 | 5,7,8,34,3<br>5,38,39,40      | 5  | O54800;Q5DWW2,P09656,P11883,Q09030,Q9Z0V6                                                                                                                 |
| 242 | 1,2,3,4,6,3<br>3,36,38 | 5,7,8,34,3<br>5,37,39,40      | 7  | O54800;Q5DWW2,P06760,P09656,P35745,Q09030,Q923V8,Q9Z0V6                                                                                                   |

|     |                        |                          |    |                                                                              |
|-----|------------------------|--------------------------|----|------------------------------------------------------------------------------|
| 243 | 1,2,3,4,6,3<br>3,36,39 | 5,7,8,34,3<br>5,37,38,40 | 7  | O54800;Q5DWV2,P06760,P09656,P35745,Q09030,Q63514,Q99MH3                      |
| 244 | 1,2,3,4,6,3<br>3,36,40 | 5,7,8,34,3<br>5,37,38,39 | 10 | O54800;Q5DWV2,P01681,P06760,P09656,P35745,P42854,Q09030,Q91XN4,Q9WTT6,Q9Z0V6 |
| 245 | 1,2,3,4,6,3<br>3,37,38 | 5,7,8,34,3<br>5,36,39,40 | 1  | O54800;Q5DWV2                                                                |
| 246 | 1,2,3,4,6,3<br>3,37,39 | 5,7,8,34,3<br>5,36,38,40 | 2  | O54800;Q5DWV2,Q6AYQ8                                                         |
| 247 | 1,2,3,4,6,3<br>3,37,40 | 5,7,8,34,3<br>5,36,38,39 | 3  | O54800;Q5DWV2,P06760,P35745                                                  |
| 248 | 1,2,3,4,6,3<br>3,38,39 | 5,7,8,34,3<br>5,36,37,40 | 2  | O54800;Q5DWV2,P06760                                                         |
| 249 | 1,2,3,4,6,3<br>3,38,40 | 5,7,8,34,3<br>5,36,37,39 | 6  | O54800;Q5DWV2,P01039,P06760,P35745,Q6P6R2,Q9QX74                             |
| 250 | 1,2,3,4,6,3<br>3,39,40 | 5,7,8,34,3<br>5,36,37,38 | 4  | O54800;Q5DWV2,P06760,P35745,Q6AYQ8                                           |
| 251 | 1,2,3,4,6,3<br>4,35,36 | 5,7,8,33,3<br>7,38,39,40 | 3  | P09656,Q5I0D7,Q9QWN8                                                         |
| 252 | 1,2,3,4,6,3<br>4,35,37 | 5,7,8,33,3<br>6,38,39,40 | 2  | P19132,P39069                                                                |
| 253 | 1,2,3,4,6,3<br>4,35,38 | 5,7,8,33,3<br>6,37,39,40 | 7  | O54800;Q5DWV2,P01946,P02091,P80299,P97580,Q4KLZ6,Q9QWN8                      |
| 254 | 1,2,3,4,6,3<br>4,35,39 | 5,7,8,33,3<br>6,37,38,40 | 0  |                                                                              |
| 255 | 1,2,3,4,6,3<br>4,35,40 | 5,7,8,33,3<br>6,37,38,39 | 3  | P06760,P15399,P97580                                                         |
| 256 | 1,2,3,4,6,3<br>4,36,37 | 5,7,8,33,3<br>5,38,39,40 | 4  | O55145,P09656,P11883,Q4KLZ6                                                  |
| 257 | 1,2,3,4,6,3<br>4,36,38 | 5,7,8,33,3<br>5,37,39,40 | 6  | P01946,P02091,P09656,P80299,Q4KLZ6,Q9QWN8                                    |
| 258 | 1,2,3,4,6,3<br>4,36,39 | 5,7,8,33,3<br>5,37,38,40 | 2  | P97615,Q9Z1F2                                                                |
| 259 | 1,2,3,4,6,3<br>4,36,40 | 5,7,8,33,3<br>5,37,38,39 | 4  | P06760,P97580,P97615,Q4KLZ6                                                  |
| 260 | 1,2,3,4,6,3<br>4,37,38 | 5,7,8,33,3<br>5,36,39,40 | 3  | P01946,P02091,Q4KLZ6                                                         |
| 261 | 1,2,3,4,6,3<br>4,37,39 | 5,7,8,33,3<br>5,36,38,40 | 0  |                                                                              |
| 262 | 1,2,3,4,6,3<br>4,37,40 | 5,7,8,33,3<br>5,36,38,39 | 3  | P33436,P97580,Q4KLZ6                                                         |

|     |                        |                          |   |                                                         |
|-----|------------------------|--------------------------|---|---------------------------------------------------------|
| 263 | 1,2,3,4,6,3<br>4,38,39 | 5,7,8,33,3<br>5,36,37,40 | 4 | P01946,P02091,P97580,Q4KLZ6                             |
| 264 | 1,2,3,4,6,3<br>4,38,40 | 5,7,8,33,3<br>5,36,37,39 | 6 | P01946,P02091,P06760,P15399,P97580,Q4KLZ6               |
| 265 | 1,2,3,4,6,3<br>4,39,40 | 5,7,8,33,3<br>5,36,37,38 | 3 | P06760,P15399,P97580                                    |
| 266 | 1,2,3,4,6,3<br>5,36,37 | 5,7,8,33,3<br>4,38,39,40 | 3 | P06760,P09656,P19132                                    |
| 267 | 1,2,3,4,6,3<br>5,36,38 | 5,7,8,33,3<br>4,37,39,40 | 6 | P06760,P09656,P19218,P21674,Q9QWN8,Q9QX74               |
| 268 | 1,2,3,4,6,3<br>5,36,39 | 5,7,8,33,3<br>4,37,38,40 | 3 | P06760,P09656,Q62714                                    |
| 269 | 1,2,3,4,6,3<br>5,36,40 | 5,7,8,33,3<br>4,37,38,39 | 7 | P02793;Q7TP54,P06760,P09656,P19132,Q9EQS0,Q9QX74,Q9Z0V6 |
| 270 | 1,2,3,4,6,3<br>5,37,38 | 5,7,8,33,3<br>4,36,39,40 | 2 | P06760,Q9QX74                                           |
| 271 | 1,2,3,4,6,3<br>5,37,39 | 5,7,8,33,3<br>4,36,38,40 | 2 | P06760,Q9QX74                                           |
| 272 | 1,2,3,4,6,3<br>5,37,40 | 5,7,8,33,3<br>4,36,38,39 | 5 | P02793;Q7TP54,P06760,P19132,P82471,Q9QX74               |
| 273 | 1,2,3,4,6,3<br>5,38,39 | 5,7,8,33,3<br>4,36,37,40 | 3 | P06760,Q6P6R2,Q9QX74                                    |
| 274 | 1,2,3,4,6,3<br>5,38,40 | 5,7,8,33,3<br>4,36,37,39 | 4 | P02793;Q7TP54,P06760,Q6P6R2,Q9QX74                      |
| 275 | 1,2,3,4,6,3<br>5,39,40 | 5,7,8,33,3<br>4,36,37,38 | 5 | P00774,P06760,P54921,P82471,Q9QX74                      |
| 276 | 1,2,3,4,6,3<br>6,37,38 | 5,7,8,33,3<br>4,35,39,40 | 4 | P09656,Q4KLZ6,Q9QX74,Q9Z0V6                             |
| 277 | 1,2,3,4,6,3<br>6,37,39 | 5,7,8,33,3<br>4,35,38,40 | 3 | P06760,P09656,Q9QX74                                    |
| 278 | 1,2,3,4,6,3<br>6,37,40 | 5,7,8,33,3<br>4,35,38,39 | 7 | P06760,P09656,P19132,P82471,Q4KLZ6,Q9QX74,Q9Z0V6        |
| 279 | 1,2,3,4,6,3<br>6,38,39 | 5,7,8,33,3<br>4,35,37,40 | 3 | P06760,P09656,Q9QX74                                    |
| 280 | 1,2,3,4,6,3<br>6,38,40 | 5,7,8,33,3<br>4,35,37,39 | 5 | P06760,P09656,Q4KLZ6,Q9QX74,Q9Z0V6                      |
| 281 | 1,2,3,4,6,3<br>6,39,40 | 5,7,8,33,3<br>4,35,37,38 | 3 | P06760,P54921,Q9QX74                                    |
| 282 | 1,2,3,4,6,3<br>7,38,39 | 5,7,8,33,3<br>4,35,36,40 | 2 | P06760,Q9QX74                                           |

|     |                        |                               |                                                           |
|-----|------------------------|-------------------------------|-----------------------------------------------------------|
| 283 | 1,2,3,4,6,3<br>7,38,40 | 5,7,8,33,3<br>4,35,36,39      | 5 P06760,P23739,P82471,Q4KLZ6,Q9QX74                      |
| 284 | 1,2,3,4,6,3<br>7,39,40 | 5,7,8,33,3<br>4,35,36,38      | 3 P06760,P82471,Q9QX74                                    |
| 285 | 1,2,3,4,6,3<br>8,39,40 | 5,7,8,33,3<br>4,35,36,37      | 6 P06760,P51740,P54921,P55091,Q6P6R2,Q9QX74               |
| 286 | 1,2,3,4,7,8<br>,33,34  | 5,6,35,36,<br>37,38,39,4<br>0 | 8 G3V686,P51740,P80299,P97615,Q30KJ2,Q4V885,Q63475,Q6AYQ8 |
| 287 | 1,2,3,4,7,8<br>,33,35  | 5,6,34,36,<br>37,38,39,4<br>0 | 4 P36860,P51740,Q5PPH0,Q63475                             |
| 288 | 1,2,3,4,7,8<br>,33,36  | 5,6,34,35,<br>37,38,39,4<br>0 | 6 G3V686,O54728,P01681,P51740,P97615,Q63475               |
| 289 | 1,2,3,4,7,8<br>,33,37  | 5,6,34,35,<br>36,38,39,4<br>0 | 3 P51740,Q63475,Q6AYQ8                                    |
| 290 | 1,2,3,4,7,8<br>,33,38  | 5,6,34,35,<br>36,37,39,4<br>0 | 4 O70417,P35280,Q63475,Q6AYQ8                             |
| 291 | 1,2,3,4,7,8<br>,33,39  | 5,6,34,35,<br>36,37,38,4<br>0 | 8 D3ZTE0,P04916,P20762,P36376,Q5RKI1,Q63475,Q63514,Q6AYQ8 |
| 292 | 1,2,3,4,7,8<br>,33,40  | 5,6,34,35,<br>36,37,38,3<br>9 | 3 P01681,Q63475,Q6AYQ8                                    |
| 293 | 1,2,3,4,7,8<br>,34,35  | 5,6,33,36,<br>37,38,39,4<br>0 | 7 P20766,P36860,P51740,P97580,Q30KJ2,Q66H69,Q9Z1F2        |
| 294 | 1,2,3,4,7,8<br>,34,36  | 5,6,33,35,<br>37,38,39,4<br>0 | 7 G3V686,P20766,P51740,P97615,Q30KJ2,Q66H69,Q9Z1F2        |
| 295 | 1,2,3,4,7,8<br>,34,37  | 5,6,33,35,<br>36,38,39,4<br>0 | 5 P36860,P51740,Q30KJ2,Q66H69,Q6AYQ8                      |
| 296 | 1,2,3,4,7,8<br>,34,38  | 5,6,33,35,<br>36,37,39,4<br>0 | 5 B1H234,O70417,P35280,P97580,Q30KJ2                      |



|     |                       |                               |    |                                                                              |
|-----|-----------------------|-------------------------------|----|------------------------------------------------------------------------------|
| 297 | 1,2,3,4,7,8<br>,34,39 | 5,6,33,35,<br>36,37,38,4<br>0 | 11 | G3V686,P20762,P20766,P36376,P36860,P97580,Q30KJ2,Q63618,Q6AYQ8,Q9Z0V6,Q9Z1F2 |
| 298 | 1,2,3,4,7,8<br>,34,40 | 5,6,33,35,<br>36,37,38,3<br>9 | 5  | P15399,P20766,P97580,Q30KJ2,Q66H69                                           |
| 299 | 1,2,3,4,7,8<br>,35,36 | 5,6,33,34,<br>37,38,39,4<br>0 | 6  | P19218,P36860,P51740,P97840,Q66H69,Q9Z1F2                                    |
| 300 | 1,2,3,4,7,8<br>,35,37 | 5,6,33,34,<br>36,38,39,4<br>0 | 4  | P19132,P36860,P51740,Q66H69                                                  |
| 301 | 1,2,3,4,7,8<br>,35,38 | 5,6,33,34,<br>36,37,39,4<br>0 | 5  | O70417,P19218,P35280,P36374,P36860                                           |
| 302 | 1,2,3,4,7,8<br>,35,39 | 5,6,33,34,<br>36,37,38,4<br>0 | 5  | P20762,P23593,P36376,P36860,Q9Z1F2                                           |
| 303 | 1,2,3,4,7,8<br>,35,40 | 5,6,33,34,<br>36,37,38,3<br>9 | 5  | P00774,P02793,Q7TP54,P36374,P36860,Q66H69                                    |
| 304 | 1,2,3,4,7,8<br>,36,37 | 5,6,33,34,<br>35,38,39,4<br>0 | 6  | P19132,P47967,P51740,P55091,P97840,Q66H69                                    |
| 305 | 1,2,3,4,7,8<br>,36,38 | 5,6,33,34,<br>35,37,39,4<br>0 | 3  | O70417,P19218,P35280                                                         |
| 306 | 1,2,3,4,7,8<br>,36,39 | 5,6,33,34,<br>35,37,38,4<br>0 | 5  | P20762,P36376,P63029,P97615,Q9Z1F2                                           |
| 307 | 1,2,3,4,7,8<br>,36,40 | 5,6,33,34,<br>35,37,38,3<br>9 | 2  | P97615,Q66H69                                                                |
| 308 | 1,2,3,4,7,8<br>,37,38 | 5,6,33,34,<br>35,36,39,4<br>0 | 4  | P22006,P35280,Q6IFW6,Q9EQS0                                                  |
| 309 | 1,2,3,4,7,8<br>,37,39 | 5,6,33,34,<br>35,36,38,4<br>0 | 4  | P20762,P23593,P63029,Q6AYQ8                                                  |

|     |                        |                               |                                                                          |
|-----|------------------------|-------------------------------|--------------------------------------------------------------------------|
| 310 | 1,2,3,4,7,8<br>,37,40  | 5,6,33,34,<br>35,36,38,3<br>9 | 2 Q66H69,Q6AYQ8                                                          |
| 311 | 1,2,3,4,7,8<br>,38,39  | 5,6,33,34,<br>35,36,37,4<br>0 | 10 D4A5U3,P02770,P11883,P20762,P35280,P36376,Q63556,Q63618,Q6AYQ8,Q9EQS0 |
| 312 | 1,2,3,4,7,8<br>,38,40  | 5,6,33,34,<br>35,36,37,3<br>9 | 2 O70417,P35280                                                          |
| 313 | 1,2,3,4,7,8<br>,39,40  | 5,6,33,34,<br>35,36,37,3<br>8 | 4 P10758,P20762,P36376,Q6AYQ8                                            |
| 314 | 1,2,3,4,7,3<br>3,34,35 | 5,6,8,36,3<br>7,38,39,40      | 7 D3ZUC6,P08721,P51740,P80299,Q5I0D7,Q63475,Q8K1G0                       |
| 315 | 1,2,3,4,7,3<br>3,34,36 | 5,6,8,35,3<br>7,38,39,40      | 9 G3V686,P08721,P51740,P80299,P97615,Q5I0D7,Q63475,Q6AYQ8,Q8K1G0         |
| 316 | 1,2,3,4,7,3<br>3,34,37 | 5,6,8,35,3<br>6,38,39,40      | 4 P51740,P80299,Q6AYQ8,Q8K1G0                                            |
| 317 | 1,2,3,4,7,3<br>3,34,38 | 5,6,8,35,3<br>6,37,39,40      | 4 P80299,Q63475,Q6AYQ8,Q8K1G0                                            |
| 318 | 1,2,3,4,7,3<br>3,34,39 | 5,6,8,35,3<br>6,37,38,40      | 6 G3V686,P80299,Q5RKI1,Q64093,Q6AYQ8,Q8K1G0                              |
| 319 | 1,2,3,4,7,3<br>3,34,40 | 5,6,8,35,3<br>6,37,38,39      | 4 P80299,Q63475,Q6AYQ8,Q8K1G0                                            |
| 320 | 1,2,3,4,7,3<br>3,35,36 | 5,6,8,34,3<br>7,38,39,40      | 4 P08721,P49134,P51740,P97840                                            |
| 321 | 1,2,3,4,7,3<br>3,35,37 | 5,6,8,34,3<br>6,38,39,40      | 1 P51740                                                                 |
| 322 | 1,2,3,4,7,3<br>3,35,38 | 5,6,8,34,3<br>6,37,39,40      | 1 P13432                                                                 |
| 323 | 1,2,3,4,7,3<br>3,35,39 | 5,6,8,34,3<br>6,37,38,40      | 2 Q5RKI1,Q6AYQ8                                                          |
| 324 | 1,2,3,4,7,3<br>3,35,40 | 5,6,8,34,3<br>6,37,38,39      | 0                                                                        |
| 325 | 1,2,3,4,7,3<br>3,36,37 | 5,6,8,34,3<br>5,38,39,40      | 4 P47967,P51740,P97840,Q6AYQ8                                            |
| 326 | 1,2,3,4,7,3<br>3,36,38 | 5,6,8,34,3<br>5,37,39,40      | 0                                                                        |
| 327 | 1,2,3,4,7,3<br>3,36,39 | 5,6,8,34,3<br>5,37,38,40      | 2 Q5RKI1,Q6AYQ8                                                          |

|     |                        |                          |   |                                                         |
|-----|------------------------|--------------------------|---|---------------------------------------------------------|
| 328 | 1,2,3,4,7,3<br>3,36,40 | 5,6,8,34,3<br>5,37,38,39 | 1 | P01681                                                  |
| 329 | 1,2,3,4,7,3<br>3,37,38 | 5,6,8,34,3<br>5,36,39,40 | 1 | Q6AYQ8                                                  |
| 330 | 1,2,3,4,7,3<br>3,37,39 | 5,6,8,34,3<br>5,36,38,40 | 2 | Q5RKI1,Q6AYQ8                                           |
| 331 | 1,2,3,4,7,3<br>3,37,40 | 5,6,8,34,3<br>5,36,38,39 | 1 | Q6AYQ8                                                  |
| 332 | 1,2,3,4,7,3<br>3,38,39 | 5,6,8,34,3<br>5,36,37,40 | 6 | P02770,P13432,Q5RKI1,Q63556,Q64093,Q6AYQ8               |
| 333 | 1,2,3,4,7,3<br>3,38,40 | 5,6,8,34,3<br>5,36,37,39 | 2 | Q6AYQ8,Q9QYP1                                           |
| 334 | 1,2,3,4,7,3<br>3,39,40 | 5,6,8,34,3<br>5,36,37,38 | 2 | Q5RKI1,Q6AYQ8                                           |
| 335 | 1,2,3,4,7,3<br>4,35,36 | 5,6,8,33,3<br>7,38,39,40 | 6 | P25031,P51740,P97840,Q5I0D7,Q9QWN8,Q9Z1F2               |
| 336 | 1,2,3,4,7,3<br>4,35,37 | 5,6,8,33,3<br>6,38,39,40 | 3 | P19132,P25031,P51740                                    |
| 337 | 1,2,3,4,7,3<br>4,35,38 | 5,6,8,33,3<br>6,37,39,40 | 2 | P80299,Q9QWN8                                           |
| 338 | 1,2,3,4,7,3<br>4,35,39 | 5,6,8,33,3<br>6,37,38,40 | 2 | P20766,Q9Z1F2                                           |
| 339 | 1,2,3,4,7,3<br>4,35,40 | 5,6,8,33,3<br>6,37,38,39 | 1 | P10758                                                  |
| 340 | 1,2,3,4,7,3<br>4,36,37 | 5,6,8,33,3<br>5,38,39,40 | 5 | P25031,P47967,P51740,P55091,P97840                      |
| 341 | 1,2,3,4,7,3<br>4,36,38 | 5,6,8,33,3<br>5,37,39,40 | 4 | P02091,P80299,Q4KLZ6,Q9QWN8                             |
| 342 | 1,2,3,4,7,3<br>4,36,39 | 5,6,8,33,3<br>5,37,38,40 | 3 | P20766,P25031,Q9Z1F2                                    |
| 343 | 1,2,3,4,7,3<br>4,36,40 | 5,6,8,33,3<br>5,37,38,39 | 0 |                                                         |
| 344 | 1,2,3,4,7,3<br>4,37,38 | 5,6,8,33,3<br>5,36,39,40 | 2 | Q4KLZ6,Q6AY61                                           |
| 345 | 1,2,3,4,7,3<br>4,37,39 | 5,6,8,33,3<br>5,36,38,40 | 2 | P25031,Q6AYQ8                                           |
| 346 | 1,2,3,4,7,3<br>4,37,40 | 5,6,8,33,3<br>5,36,38,39 | 1 | Q6AYQ8                                                  |
| 347 | 1,2,3,4,7,3<br>4,38,39 | 5,6,8,33,3<br>5,36,37,40 | 8 | P02770,P20766,P50503,P80299,Q63556,Q63618,Q64093,Q6AYQ8 |

|     |                        |                          |   |                                                  |
|-----|------------------------|--------------------------|---|--------------------------------------------------|
| 348 | 1,2,3,4,7,3<br>4,38,40 | 5,6,8,33,3<br>5,36,37,39 | 4 | P10758,P80299,P97580,Q4KLZ6                      |
| 349 | 1,2,3,4,7,3<br>4,39,40 | 5,6,8,33,3<br>5,36,37,38 | 3 | P10758,P20766,Q6AYQ8                             |
| 350 | 1,2,3,4,7,3<br>5,36,37 | 5,6,8,33,3<br>4,38,39,40 | 6 | P02793;Q7TP54,P19132,P25031,P47967,P51740,P97840 |
| 351 | 1,2,3,4,7,3<br>5,36,38 | 5,6,8,33,3<br>4,37,39,40 | 3 | P13432,P21674,Q9QWN8                             |
| 352 | 1,2,3,4,7,3<br>5,36,39 | 5,6,8,33,3<br>4,37,38,40 | 3 | P25031,Q62714,Q9Z1F2                             |
| 353 | 1,2,3,4,7,3<br>5,36,40 | 5,6,8,33,3<br>4,37,38,39 | 3 | P02793;Q7TP54,P19132,Q9QWN8                      |
| 354 | 1,2,3,4,7,3<br>5,37,38 | 5,6,8,33,3<br>4,36,39,40 | 0 |                                                  |
| 355 | 1,2,3,4,7,3<br>5,37,39 | 5,6,8,33,3<br>4,36,38,40 | 1 | P25031                                           |
| 356 | 1,2,3,4,7,3<br>5,37,40 | 5,6,8,33,3<br>4,36,38,39 | 2 | P02793;Q7TP54,P19132                             |
| 357 | 1,2,3,4,7,3<br>5,38,39 | 5,6,8,33,3<br>4,36,37,40 | 3 | P02770,P10758,P13432                             |
| 358 | 1,2,3,4,7,3<br>5,38,40 | 5,6,8,33,3<br>4,36,37,39 | 5 | P00774,P02793;Q7TP54,P06760,P10758,Q6P6R2        |
| 359 | 1,2,3,4,7,3<br>5,39,40 | 5,6,8,33,3<br>4,36,37,38 | 3 | P00774,P06760,P10758                             |
| 360 | 1,2,3,4,7,3<br>6,37,38 | 5,6,8,33,3<br>4,35,39,40 | 1 | P97840                                           |
| 361 | 1,2,3,4,7,3<br>6,37,39 | 5,6,8,33,3<br>4,35,38,40 | 3 | P25031,P63029,Q6AYQ8                             |
| 362 | 1,2,3,4,7,3<br>6,37,40 | 5,6,8,33,3<br>4,35,38,39 | 2 | P02793;Q7TP54,P19132                             |
| 363 | 1,2,3,4,7,3<br>6,38,39 | 5,6,8,33,3<br>4,35,37,40 | 1 | P13432                                           |
| 364 | 1,2,3,4,7,3<br>6,38,40 | 5,6,8,33,3<br>4,35,37,39 | 1 | Q9QWN8                                           |
| 365 | 1,2,3,4,7,3<br>6,39,40 | 5,6,8,33,3<br>4,35,37,38 | 1 | P10758                                           |
| 366 | 1,2,3,4,7,3<br>7,38,39 | 5,6,8,33,3<br>4,35,36,40 | 2 | P02770,Q6AYQ8                                    |
| 367 | 1,2,3,4,7,3<br>7,38,40 | 5,6,8,33,3<br>4,35,36,39 | 1 | Q9QX74                                           |

|     |                        |                          |    |                                                                              |
|-----|------------------------|--------------------------|----|------------------------------------------------------------------------------|
| 368 | 1,2,3,4,7,3<br>7,39,40 | 5,6,8,33,3<br>4,35,36,38 | 1  | Q6AYQ8                                                                       |
| 369 | 1,2,3,4,7,3<br>8,39,40 | 5,6,8,33,3<br>4,35,36,37 | 6  | O89117,P02770,P06760,P10758,P55091,Q9QX74                                    |
| 370 | 1,2,3,4,8,3<br>3,34,35 | 5,6,7,36,3<br>7,38,39,40 | 8  | D3ZUC6,G3V686,P00762,P36860,P51740,P97580,Q30KJ2,Q63475                      |
| 371 | 1,2,3,4,8,3<br>3,34,36 | 5,6,7,35,3<br>7,38,39,40 | 11 | G3V686,O54728,P00762,P01681,P02625,P51740,P97615,Q30KJ2,Q5QE79,Q63475,Q99MH3 |
| 372 | 1,2,3,4,8,3<br>3,34,37 | 5,6,7,35,3<br>6,38,39,40 | 4  | P51740,Q30KJ2,Q63475,Q6AYQ8                                                  |
| 373 | 1,2,3,4,8,3<br>3,34,38 | 5,6,7,35,3<br>6,37,39,40 | 9  | G3V686,P00762,P02091,P02625,P80299,P97580,Q30KJ2,Q63475,Q6IG05               |
| 374 | 1,2,3,4,8,3<br>3,34,39 | 5,6,7,35,3<br>6,37,38,40 | 11 | G3V686,P00762,P02651,P20762,P36376,P97580,Q30KJ2,Q63475,Q63514,Q6AYQ8,Q99MH3 |
| 375 | 1,2,3,4,8,3<br>3,34,40 | 5,6,7,35,3<br>6,37,38,39 | 6  | P00762,P01681,P15399,P97580,Q30KJ2,Q63475                                    |
| 376 | 1,2,3,4,8,3<br>3,35,36 | 5,6,7,34,3<br>7,38,39,40 | 4  | G3V686,O54728,P01681,P51740                                                  |
| 377 | 1,2,3,4,8,3<br>3,35,37 | 5,6,7,34,3<br>6,38,39,40 | 3  | P36860,P50116,P51740                                                         |
| 378 | 1,2,3,4,8,3<br>3,35,38 | 5,6,7,34,3<br>6,37,39,40 | 2  | O70417,Q63475                                                                |
| 379 | 1,2,3,4,8,3<br>3,35,39 | 5,6,7,34,3<br>6,37,38,40 | 3  | P36376,Q5PPH0,Q63514                                                         |
| 380 | 1,2,3,4,8,3<br>3,35,40 | 5,6,7,34,3<br>6,37,38,39 | 2  | P01681,Q63475                                                                |
| 381 | 1,2,3,4,8,3<br>3,36,37 | 5,6,7,34,3<br>5,38,39,40 | 3  | O54728,P01681,P51740                                                         |
| 382 | 1,2,3,4,8,3<br>3,36,38 | 5,6,7,34,3<br>5,37,39,40 | 3  | O54728,P01681,Q63475                                                         |
| 383 | 1,2,3,4,8,3<br>3,36,39 | 5,6,7,34,3<br>5,37,38,40 | 5  | G3V686,O54728,P01681,P36376,Q63514                                           |
| 384 | 1,2,3,4,8,3<br>3,36,40 | 5,6,7,34,3<br>5,37,38,39 | 3  | O54728,P01681,Q63475                                                         |
| 385 | 1,2,3,4,8,3<br>3,37,38 | 5,6,7,34,3<br>5,36,39,40 | 1  | Q6IG05                                                                       |
| 386 | 1,2,3,4,8,3<br>3,37,39 | 5,6,7,34,3<br>5,36,38,40 | 1  | Q6AYQ8                                                                       |
| 387 | 1,2,3,4,8,3<br>3,37,40 | 5,6,7,34,3<br>5,36,38,39 | 1  | Q6AYQ8                                                                       |

|     |                        |                          |   |                                                         |
|-----|------------------------|--------------------------|---|---------------------------------------------------------|
| 388 | 1,2,3,4,8,3<br>3,38,39 | 5,6,7,34,3<br>5,36,37,40 | 3 | P36376,Q63514,Q6AYQ8                                    |
| 389 | 1,2,3,4,8,3<br>3,38,40 | 5,6,7,34,3<br>5,36,37,39 | 2 | P01681,Q63475                                           |
| 390 | 1,2,3,4,8,3<br>3,39,40 | 5,6,7,34,3<br>5,36,37,38 | 3 | P01681,P36376,Q6AYQ8                                    |
| 391 | 1,2,3,4,8,3<br>4,35,36 | 5,6,7,33,3<br>7,38,39,40 | 7 | G3V686,P36860,P50116,P51740,P97580,Q30KJ2,Q9Z1F2        |
| 392 | 1,2,3,4,8,3<br>4,35,37 | 5,6,7,33,3<br>6,38,39,40 | 5 | P36860,P50116,P51740,P97580,Q30KJ2                      |
| 393 | 1,2,3,4,8,3<br>4,35,38 | 5,6,7,33,3<br>6,37,39,40 | 3 | P36860,P97580,Q30KJ2                                    |
| 394 | 1,2,3,4,8,3<br>4,35,39 | 5,6,7,33,3<br>6,37,38,40 | 7 | P20762,P36376,P36860,P50116,P97580,Q30KJ2,Q9Z1F2        |
| 395 | 1,2,3,4,8,3<br>4,35,40 | 5,6,7,33,3<br>6,37,38,39 | 5 | P00774,P15399,P36860,P97580,Q30KJ2                      |
| 396 | 1,2,3,4,8,3<br>4,36,37 | 5,6,7,33,3<br>5,38,39,40 | 3 | P50116,P51740,P55091                                    |
| 397 | 1,2,3,4,8,3<br>4,36,38 | 5,6,7,33,3<br>5,37,39,40 | 6 | G3V686,P02091,P02625,P97580,Q30KJ2,Q4KLZ6               |
| 398 | 1,2,3,4,8,3<br>4,36,39 | 5,6,7,33,3<br>5,37,38,40 | 8 | G3V686,P20762,P36376,P97580,P97615,Q30KJ2,Q63514,Q9Z1F2 |
| 399 | 1,2,3,4,8,3<br>4,36,40 | 5,6,7,33,3<br>5,37,38,39 | 4 | P15399,P97580,P97615,Q30KJ2                             |
| 400 | 1,2,3,4,8,3<br>4,37,38 | 5,6,7,33,3<br>5,36,39,40 | 7 | P97580,Q30KJ2,Q4KLZ6,Q6IFU8,Q6IFW6,Q6IG02,Q6IG05        |
| 401 | 1,2,3,4,8,3<br>4,37,39 | 5,6,7,33,3<br>5,36,38,40 | 5 | P20762,P50116,P97580,Q30KJ2,Q6AYQ8                      |
| 402 | 1,2,3,4,8,3<br>4,37,40 | 5,6,7,33,3<br>5,36,38,39 | 4 | P15399,P97580,Q30KJ2,Q923V8                             |
| 403 | 1,2,3,4,8,3<br>4,38,39 | 5,6,7,33,3<br>5,36,37,40 | 8 | D4A5U3,P02091,P20762,P36376,P50503,P97580,Q30KJ2,Q63618 |
| 404 | 1,2,3,4,8,3<br>4,38,40 | 5,6,7,33,3<br>5,36,37,39 | 4 | P15399,P97580,Q30KJ2,Q4KLZ6                             |
| 405 | 1,2,3,4,8,3<br>4,39,40 | 5,6,7,33,3<br>5,36,37,38 | 5 | P15399,P20762,P36376,P97580,Q30KJ2                      |
| 406 | 1,2,3,4,8,3<br>5,36,37 | 5,6,7,33,3<br>4,38,39,40 | 3 | P19132,P50116,P51740                                    |
| 407 | 1,2,3,4,8,3<br>5,36,38 | 5,6,7,33,3<br>4,37,39,40 | 2 | P19218,P21674                                           |

|     |                         |                          |    |                                                                       |
|-----|-------------------------|--------------------------|----|-----------------------------------------------------------------------|
| 408 | 1,2,3,4,8,3<br>5,36,39  | 5,6,7,33,3<br>4,37,38,40 | 4  | P36376,P50116,Q62714,Q9Z1F2                                           |
| 409 | 1,2,3,4,8,3<br>5,36,40  | 5,6,7,33,3<br>4,37,38,39 | 2  | P02793;Q7TP54,P50116                                                  |
| 410 | 1,2,3,4,8,3<br>5,37,38  | 5,6,7,33,3<br>4,36,39,40 | 1  | P36860                                                                |
| 411 | 1,2,3,4,8,3<br>5,37,39  | 5,6,7,33,3<br>4,36,38,40 | 3  | P36376,P36860,P50116                                                  |
| 412 | 1,2,3,4,8,3<br>5,37,40  | 5,6,7,33,3<br>4,36,38,39 | 4  | P19132,P36860,P50116,P82471                                           |
| 413 | 1,2,3,4,8,3<br>5,38,39  | 5,6,7,33,3<br>4,36,37,40 | 1  | P36376                                                                |
| 414 | 1,2,3,4,8,3<br>5,38,40  | 5,6,7,33,3<br>4,36,37,39 | 3  | P00774,P98089,Q62635                                                  |
| 415 | 1,2,3,4,8,3<br>5,39,40  | 5,6,7,33,3<br>4,36,37,38 | 5  | P00774,P36376,P36860,P50116,P54921                                    |
| 416 | 1,2,3,4,8,3<br>6,37,38  | 5,6,7,33,3<br>4,35,39,40 | 0  |                                                                       |
| 417 | 1,2,3,4,8,3<br>6,37,39  | 5,6,7,33,3<br>4,35,38,40 | 1  | P50116                                                                |
| 418 | 1,2,3,4,8,3<br>6,37,40  | 5,6,7,33,3<br>4,35,38,39 | 2  | P50116,P82471                                                         |
| 419 | 1,2,3,4,8,3<br>6,38,39  | 5,6,7,33,3<br>4,35,37,40 | 2  | P36376,Q5BJY9                                                         |
| 420 | 1,2,3,4,8,3<br>6,38,40  | 5,6,7,33,3<br>4,35,37,39 | 0  |                                                                       |
| 421 | 1,2,3,4,8,3<br>6,39,40  | 5,6,7,33,3<br>4,35,37,38 | 3  | P36376,P54921,Q5BJY9                                                  |
| 422 | 1,2,3,4,8,3<br>7,38,39  | 5,6,7,33,3<br>4,35,36,40 | 4  | P36376,Q63618,Q6IFW6,Q6IG02                                           |
| 423 | 1,2,3,4,8,3<br>7,38,40  | 5,6,7,33,3<br>4,35,36,39 | 1  | Q6IFW6                                                                |
| 424 | 1,2,3,4,8,3<br>7,39,40  | 5,6,7,33,3<br>4,35,36,38 | 4  | P36376,P50116,P82471,Q6AYQ8                                           |
| 425 | 1,2,3,4,8,3<br>8,39,40  | 5,6,7,33,3<br>4,35,36,37 | 7  | D4A5U3,P36376,P54921,P55091,Q5BJY9,Q62635,Q8CIZ5                      |
| 426 | 1,2,3,4,33,<br>34,35,36 | 5,6,7,8,37,<br>38,39,40  | 10 | D3ZUC6,G3V686,P08721,P25031,P35745,P51740,Q5I0D7,Q5QE79,Q6PCU2,Q8K1G0 |
| 427 | 1,2,3,4,33,<br>34,35,37 | 5,6,7,8,36,<br>38,39,40  | 8  | B0BNN3,D3ZUC6,P25031,P50115,P50116,P51740,P80020,Q8K1G0               |

|     |                                              |                                                    |
|-----|----------------------------------------------|----------------------------------------------------|
| 428 | 1,2,3,4,33, 5,6,7,8,36,<br>34,35,38 37,39,40 | 4 D3ZUC6,P80299,Q63475,Q8K1G0                      |
| 429 | 1,2,3,4,33, 5,6,7,8,36,<br>34,35,39 37,38,40 | 2 D3ZUC6,Q8K1G0                                    |
| 430 | 1,2,3,4,33, 5,6,7,8,36,<br>34,35,40 37,38,39 | 5 D3ZUC6,P35745,P50115,Q63475,Q8K1G0               |
| 431 | 1,2,3,4,33, 5,6,7,8,35,<br>34,36,37 38,39,40 | 5 D3ZUC6,P25031,P51740,P98089,Q5QE79               |
| 432 | 1,2,3,4,33, 5,6,7,8,35,<br>34,36,38 37,39,40 | 7 D3ZUC6,G3V686,P02091,P35745,P80299,Q4KLZ6,Q99041 |
| 433 | 1,2,3,4,33, 5,6,7,8,35,<br>34,36,39 37,38,40 | 5 D3ZUC6,G3V686,Q63514,Q99041,Q99MH3               |
| 434 | 1,2,3,4,33, 5,6,7,8,35,<br>34,36,40 37,38,39 | 3 D3ZUC6,P01681,P35745                             |
| 435 | 1,2,3,4,33, 5,6,7,8,35,<br>34,37,38 36,39,40 | 3 B0BNN3,P80299,Q4KLZ6                             |
| 436 | 1,2,3,4,33, 5,6,7,8,35,<br>34,37,39 36,38,40 | 1 Q6AYQ8                                           |
| 437 | 1,2,3,4,33, 5,6,7,8,35,<br>34,37,40 36,38,39 | 2 P50115,Q6AYQ8                                    |
| 438 | 1,2,3,4,33, 5,6,7,8,35,<br>34,38,39 36,37,40 | 3 P80299,Q6AYQ8,Q99041                             |
| 439 | 1,2,3,4,33, 5,6,7,8,35,<br>34,38,40 36,37,39 | 6 P35745,P80299,P97580,Q4KLZ6,Q63475,Q9QYP1        |
| 440 | 1,2,3,4,33, 5,6,7,8,35,<br>34,39,40 36,37,38 | 3 P19218,P35745,Q6AYQ8                             |
| 441 | 1,2,3,4,33, 5,6,7,8,34,<br>35,36,37 38,39,40 | 4 P25031,P50115,P50116,P51740                      |
| 442 | 1,2,3,4,33, 5,6,7,8,34,<br>35,36,38 37,39,40 | 3 P06760,P21674,P49134                             |
| 443 | 1,2,3,4,33, 5,6,7,8,34,<br>35,36,39 37,38,40 | 4 P01681,P06760,P49134,Q62714                      |
| 444 | 1,2,3,4,33, 5,6,7,8,34,<br>35,36,40 37,38,39 | 4 P01681,P06760,P49134,Q9Z0V6                      |
| 445 | 1,2,3,4,33, 5,6,7,8,34,<br>35,37,38 36,39,40 | 1 B0BNN3                                           |
| 446 | 1,2,3,4,33, 5,6,7,8,34,<br>35,37,39 36,38,40 | 1 P50116                                           |
| 447 | 1,2,3,4,33, 5,6,7,8,34,<br>35,37,40 36,38,39 | 3 P06760,P50115,P50116                             |



|     |                                              |                                             |
|-----|----------------------------------------------|---------------------------------------------|
| 448 | 1,2,3,4,33, 5,6,7,8,34,<br>35,38,39 36,37,40 | 2 P06760,P49134                             |
| 449 | 1,2,3,4,33, 5,6,7,8,34,<br>35,38,40 36,37,39 | 3 P06760,Q6P6R2,Q9QYP1                      |
| 450 | 1,2,3,4,33, 5,6,7,8,34,<br>35,39,40 36,37,38 | 1 P06760                                    |
| 451 | 1,2,3,4,33, 5,6,7,8,34,<br>36,37,38 35,39,40 | 0                                           |
| 452 | 1,2,3,4,33, 5,6,7,8,34,<br>36,37,39 35,38,40 | 2 P50116,Q6AYQ8                             |
| 453 | 1,2,3,4,33, 5,6,7,8,34,<br>36,37,40 35,38,39 | 3 P01681,Q9WTT6,Q9Z0V6                      |
| 454 | 1,2,3,4,33, 5,6,7,8,34,<br>36,38,39 35,37,40 | 2 P06760,Q99041                             |
| 455 | 1,2,3,4,33, 5,6,7,8,34,<br>36,38,40 35,37,39 | 3 P01681,P06760,Q9Z0V6                      |
| 456 | 1,2,3,4,33, 5,6,7,8,34,<br>36,39,40 35,37,38 | 2 P01681,P06760                             |
| 457 | 1,2,3,4,33, 5,6,7,8,34,<br>37,38,39 35,36,40 | 2 Q6AYQ8,Q9EQV9                             |
| 458 | 1,2,3,4,33, 5,6,7,8,34,<br>37,38,40 35,36,39 | 2 Q9QX74,Q9Z1F2                             |
| 459 | 1,2,3,4,33, 5,6,7,8,34,<br>37,39,40 35,36,38 | 2 P06760,Q6AYQ8                             |
| 460 | 1,2,3,4,33, 5,6,7,8,34,<br>38,39,40 35,36,37 | 3 P06760,P55091,Q9QX74                      |
| 461 | 1,2,3,4,34, 5,6,7,8,33,<br>35,36,37 38,39,40 | 5 P19132,P25031,P50115,P50116,P51740        |
| 462 | 1,2,3,4,34, 5,6,7,8,33,<br>35,36,38 37,39,40 | 3 P21674,Q4KLZ6,Q9QWN8                      |
| 463 | 1,2,3,4,34, 5,6,7,8,33,<br>35,36,39 37,38,40 | 6 P25031,P50115,P50116,P50137,Q62714,Q9Z1F2 |
| 464 | 1,2,3,4,34, 5,6,7,8,33,<br>35,36,40 37,38,39 | 2 P50115,P50116                             |
| 465 | 1,2,3,4,34, 5,6,7,8,33,<br>35,37,38 36,39,40 | 2 B0BNN3,Q4KLZ6                             |
| 466 | 1,2,3,4,34, 5,6,7,8,33,<br>35,37,39 36,38,40 | 3 P25031,P50115,P50116                      |
| 467 | 1,2,3,4,34, 5,6,7,8,33,<br>35,37,40 36,38,39 | 2 P50115,P50116                             |

|     |                                              |                                                           |
|-----|----------------------------------------------|-----------------------------------------------------------|
| 468 | 1,2,3,4,34, 5,6,7,8,33,<br>35,38,39 36,37,40 | 0                                                         |
| 469 | 1,2,3,4,34, 5,6,7,8,33,<br>35,38,40 36,37,39 | 4 P00774,P10758,P97580,Q4KLZ6                             |
| 470 | 1,2,3,4,34, 5,6,7,8,33,<br>35,39,40 36,37,38 | 6 P00774,P06760,P10758,P50115,P50116,P97580               |
| 471 | 1,2,3,4,34, 5,6,7,8,33,<br>36,37,38 35,39,40 | 4 P02091,P25031,P29315,Q4KLZ6                             |
| 472 | 1,2,3,4,34, 5,6,7,8,33,<br>36,37,39 35,38,40 | 3 P25031,P50115,P50116                                    |
| 473 | 1,2,3,4,34, 5,6,7,8,33,<br>36,37,40 35,38,39 | 3 P50115,P50116,Q4KLZ6                                    |
| 474 | 1,2,3,4,34, 5,6,7,8,33,<br>36,38,39 35,37,40 | 3 P01946,P02091,Q4KLZ6                                    |
| 475 | 1,2,3,4,34, 5,6,7,8,33,<br>36,38,40 35,37,39 | 2 P97580,Q4KLZ6                                           |
| 476 | 1,2,3,4,34, 5,6,7,8,33,<br>36,39,40 35,37,38 | 0                                                         |
| 477 | 1,2,3,4,34, 5,6,7,8,33,<br>37,38,39 35,36,40 | 1 Q4KLZ6                                                  |
| 478 | 1,2,3,4,34, 5,6,7,8,33,<br>37,38,40 35,36,39 | 2 P97580,Q4KLZ6                                           |
| 479 | 1,2,3,4,34, 5,6,7,8,33,<br>37,39,40 35,36,38 | 3 P50115,P50116,Q6AYQ8                                    |
| 480 | 1,2,3,4,34, 5,6,7,8,33,<br>38,39,40 35,36,37 | 4 P10758,P55091,P97580,Q4KLZ6                             |
| 481 | 1,2,3,4,35, 5,6,7,8,33,<br>36,37,38 34,39,40 | 2 P25031,Q9QX74                                           |
| 482 | 1,2,3,4,35, 5,6,7,8,33,<br>36,37,39 34,38,40 | 4 P25031,P50115,P50116,Q62714                             |
| 483 | 1,2,3,4,35, 5,6,7,8,33,<br>36,37,40 34,38,39 | 7 P02793;Q7TP54,P06760,P19132,P50115,P50116,Q9QX74,Q9Z0V6 |
| 484 | 1,2,3,4,35, 5,6,7,8,33,<br>36,38,39 34,37,40 | 3 P06760,Q62714,Q9QW07                                    |
| 485 | 1,2,3,4,35, 5,6,7,8,33,<br>36,38,40 34,37,39 | 4 P02793;Q7TP54,P06760,Q9QX74,Q9Z0V6                      |
| 486 | 1,2,3,4,35, 5,6,7,8,33,<br>36,39,40 34,37,38 | 3 P06760,P50115,P50116                                    |
| 487 | 1,2,3,4,35, 5,6,7,8,33,<br>37,38,39 34,36,40 | 1 Q9QX74                                                  |

|     |                                                  |    |                                                                                                                                      |
|-----|--------------------------------------------------|----|--------------------------------------------------------------------------------------------------------------------------------------|
| 488 | 1,2,3,4,35, 5,6,7,8,33,<br>37,38,40 34,36,39     | 2  | P06760,Q9QX74                                                                                                                        |
| 489 | 1,2,3,4,35, 5,6,7,8,33,<br>37,39,40 34,36,38     | 5  | P00774,P06760,P50115,P50116,Q9QX74                                                                                                   |
| 490 | 1,2,3,4,35, 5,6,7,8,33,<br>38,39,40 34,36,37     | 8  | P00774,P06760,P10758,P55091,P98089,Q62635,Q6P6R2,Q9QX74                                                                              |
| 491 | 1,2,3,4,36, 5,6,7,8,33,<br>37,38,39 34,35,40     | 1  | Q9QX74                                                                                                                               |
| 492 | 1,2,3,4,36, 5,6,7,8,33,<br>37,38,40 34,35,39     | 4  | P06760,Q4KLZ6,Q9QX74,Q9Z0V6                                                                                                          |
| 493 | 1,2,3,4,36, 5,6,7,8,33,<br>37,39,40 34,35,38     | 4  | P06760,P50115,P50116,Q9QX74                                                                                                          |
| 494 | 1,2,3,4,36, 5,6,7,8,33,<br>38,39,40 34,35,37     | 2  | P06760,Q9QX74                                                                                                                        |
| 495 | 1,2,3,4,37, 5,6,7,8,33,<br>38,39,40 34,35,36     | 3  | P06760,P19223,Q9QX74                                                                                                                 |
| 496 | 1,2,3,5,6,7 4,34,35,36<br>,8,33 ,37,38,39,<br>40 | 18 | D3ZTX0,O54800;Q5DWV2,O54858,P16636,P36374,P42854,P52590,P80202,P85971,Q05702,Q09030,Q4AEF8,Q6IG05,Q91XN4,Q99MH3,Q99PP0,Q9QW30,Q9QZQ5 |
| 497 | 1,2,3,5,6,7 4,33,35,36<br>,8,34 ,37,38,39,<br>40 | 14 | O54858,P20766,P36374,P48199,P52590,P80202,Q05702,Q09030,Q4AEF8,Q6IG05,Q8K4G9,Q91XN4,Q9JJ50,Q9QW30                                    |
| 498 | 1,2,3,5,6,7 4,33,34,36<br>,8,35 ,37,38,39,<br>40 | 11 | O54858,P19218,P23593,P36374,P52590,P80202,P85971,Q09030,Q4AEF8,Q63149,Q91XN4                                                         |
| 499 | 1,2,3,5,6,7 4,33,34,35<br>,8,36 ,37,38,39,<br>40 | 14 | B0BNN3,O54858,P19218,P36374,P47967,P52590,P80202,P85971,Q09030,Q4AEF8,Q8K4G9,Q91XN4,Q9JJ50,Q9QZQ5                                    |
| 500 | 1,2,3,5,6,7 4,33,34,35<br>,8,37 ,36,38,39,<br>40 | 14 | B5DFC9,P01835,P19218,P47967,P52590,P80202,P82471,Q09030,Q4AEF8,Q6AY61,Q6AYR8,Q6IG05,Q91XN4,Q9JJ50                                    |
| 501 | 1,2,3,5,6,7 4,33,34,35<br>,8,38 ,36,37,39,<br>40 | 14 | O54858,O88339;Q4V882,P19218,P35280,P36374,P50115,P50116,P52590,P80202,P85971,Q09030,Q4AEF8,Q6IG05,Q91XN4                             |
| 502 | 1,2,3,5,6,7 4,33,34,35<br>,8,39 ,36,37,38,<br>40 | 14 | B0BNN3,O54858,P00714,P20766,P23593,P36374,P36376,P80202,P85971,Q09030,Q4AEF8,Q8K4G9,Q91XN4,Q9Z1F2                                    |
| 503 | 1,2,3,5,6,7 4,33,34,35<br>,8,40 ,36,37,38,<br>39 | 12 | B0BNN3,B5DFC9,O54858,P36374,P52590,P80202,P82471,P85971,Q09030,Q4AEF8,Q91XN4,Q9JJ50                                                  |

|     |                       |                               |    |                                                                                     |
|-----|-----------------------|-------------------------------|----|-------------------------------------------------------------------------------------|
| 504 | 1,2,3,5,6,7<br>,33,34 | 4,8,35,36,<br>37,38,39,4<br>0 | 10 | O54800;Q5DWV2,P08721,P52590,P60905,Q09030,Q5I0D7,Q6AY61,Q91XN4,Q99MH3,Q9ZZL0        |
| 505 | 1,2,3,5,6,7<br>,33,35 | 4,8,34,36,<br>37,38,39,4<br>0 | 8  | O54800;Q5DWV2,P08721,P36374,P52590,Q09030,Q4AEF8,Q5I0D7,Q91XN4                      |
| 506 | 1,2,3,5,6,7<br>,33,36 | 4,8,34,35,<br>37,38,39,4<br>0 | 11 | O54800;Q5DWV2,P08721,P16636,P47967,P52590,P98089,Q09030,Q5I0D7,Q91XN4,Q923V8,Q99MH3 |
| 507 | 1,2,3,5,6,7<br>,33,37 | 4,8,34,35,<br>36,38,39,4<br>0 | 10 | D3ZTX0,O54800;Q5DWV2,P47967,P52590,P98089,Q09030,Q6AY61,Q8CIZ5,Q91XN4,Q9JJ50        |
| 508 | 1,2,3,5,6,7<br>,33,38 | 4,8,34,35,<br>36,37,39,4<br>0 | 9  | O54800;Q5DWV2,P36374,P50116,P52590,P60905,Q09030,Q6AY61,Q91XN4,Q923V8               |
| 509 | 1,2,3,5,6,7<br>,33,39 | 4,8,34,35,<br>36,37,38,4<br>0 | 10 | D3ZTX0,O54800;Q5DWV2,P00714,P52590,Q09030,Q5RKI1,Q6AY61,Q6AYQ8,Q91XN4,Q99MH3        |
| 510 | 1,2,3,5,6,7<br>,33,40 | 4,8,34,35,<br>36,37,38,3<br>9 | 6  | O54800;Q5DWV2,P52590,Q09030,Q62714,Q6AY61,Q91XN4                                    |
| 511 | 1,2,3,5,6,7<br>,34,35 | 4,8,33,36,<br>37,38,39,4<br>0 | 5  | P36374,P52590,Q5I0D7,Q91XN4,Q9QWN8                                                  |
| 512 | 1,2,3,5,6,7<br>,34,36 | 4,8,33,35,<br>37,38,39,4<br>0 | 11 | B0BNN3,P47967,P52590,P98089,Q09030,Q5I0D7,Q62635,Q8K4G9,Q91XN4,Q9JJ50,Q9QWN8        |
| 513 | 1,2,3,5,6,7<br>,34,37 | 4,8,33,35,<br>36,38,39,4<br>0 | 8  | P01835,P20767,P47967,P52590,P98089,Q6AY61,Q91XN4,Q9JJ50                             |
| 514 | 1,2,3,5,6,7<br>,34,38 | 4,8,33,35,<br>36,37,39,4<br>0 | 11 | O54800;Q5DWV2,P01835,P01946,P02091,P36374,P50116,P52590,P60905,Q6AY61,Q91XN4,Q9QWN8 |
| 515 | 1,2,3,5,6,7<br>,34,39 | 4,8,33,35,<br>36,37,38,4<br>0 | 8  | P01835,P20766,P36374,P60905,Q6AY61,Q8K4G9,Q91XN4,Q9QX79                             |
| 516 | 1,2,3,5,6,7<br>,34,40 | 4,8,33,35,<br>36,37,38,3<br>9 | 7  | P01835,P20766,P36374,P52590,Q6AY61,Q91XN4,Q9JJ50                                    |

|     |                       |                               |    |                                                                                                              |
|-----|-----------------------|-------------------------------|----|--------------------------------------------------------------------------------------------------------------|
| 517 | 1,2,3,5,6,7<br>,35,36 | 4,8,33,34,<br>37,38,39,4<br>0 | 12 | B0BNN3,P00762,P19218,P36374,P47967,P52590,P53792,Q09030,Q5I0D7,Q91XN4,Q9JJS8,Q9Q<br>WN8                      |
| 518 | 1,2,3,5,6,7<br>,35,37 | 4,8,33,34,<br>36,38,39,4<br>0 | 7  | P00762,P01835,P19132,P19218,P47967,P52590,Q8CIZ5                                                             |
| 519 | 1,2,3,5,6,7<br>,35,38 | 4,8,33,34,<br>36,37,39,4<br>0 | 8  | P13432,P19218,P19814,P24368,P36374,Q62812,Q6P6R2,Q9QWN8                                                      |
| 520 | 1,2,3,5,6,7<br>,35,39 | 4,8,33,34,<br>36,37,38,4<br>0 | 5  | P00762,P08723,P24368,P30120,P36374                                                                           |
| 521 | 1,2,3,5,6,7<br>,35,40 | 4,8,33,34,<br>36,37,38,3<br>9 | 7  | P00762,P36374,P52590,P82471,Q6P6R2,Q91XN4,Q9QWN8                                                             |
| 522 | 1,2,3,5,6,7<br>,36,37 | 4,8,33,34,<br>35,38,39,4<br>0 | 15 | P00762,P01835,P09656,P19132,P47967,P52590,P55091,P97840,P98089,Q07523,Q09030,Q5I0D<br>1,Q91XN4,Q9JJ50,Q9JJS8 |
| 523 | 1,2,3,5,6,7<br>,36,38 | 4,8,33,34,<br>35,37,39,4<br>0 | 9  | P01835,P19218,P36374,P47967,P52590,Q09030,Q91XN4,Q923V8,Q9QWN8                                               |
| 524 | 1,2,3,5,6,7<br>,36,39 | 4,8,33,34,<br>35,37,38,4<br>0 | 8  | B0BNN3,P00714,P00762,P52590,Q09030,Q8K4G9,Q91XN4,Q9QWN8                                                      |
| 525 | 1,2,3,5,6,7<br>,36,40 | 4,8,33,34,<br>35,37,38,3<br>9 | 11 | B0BNN3,P00762,P01835,P36374,P52590,P53792,P82471,Q09030,Q91XN4,Q9JJ50,Q9QWN8                                 |
| 526 | 1,2,3,5,6,7<br>,37,38 | 4,8,33,34,<br>35,36,39,4<br>0 | 6  | P00762,P01835,P19218,P20767,Q6AY61,Q9JJ50                                                                    |
| 527 | 1,2,3,5,6,7<br>,37,39 | 4,8,33,34,<br>35,36,38,4<br>0 | 3  | P00762,P01835,Q6AY61                                                                                         |
| 528 | 1,2,3,5,6,7<br>,37,40 | 4,8,33,34,<br>35,36,38,3<br>9 | 9  | P00762,P01835,P20767,P52590,P82471,Q62714,Q6AY61,Q91XN4,Q9JJ50                                               |
| 529 | 1,2,3,5,6,7<br>,38,39 | 4,8,33,34,<br>35,36,37,4<br>0 | 10 | P00762,P01835,P02770,P08723,P13432,P24368,P36374,P60905,Q63556,Q6AY61                                        |

|     |                       |                               |    |                                                                                                          |
|-----|-----------------------|-------------------------------|----|----------------------------------------------------------------------------------------------------------|
| 530 | 1,2,3,5,6,7<br>,38,40 | 4,8,33,34,<br>35,36,37,3<br>9 | 11 | P01835,P36374,P50116,P52590,Q62714,Q62812,Q6AY61,Q6P6R2,Q91XN4,Q9QWN8,Q9QX74                             |
| 531 | 1,2,3,5,6,7<br>,39,40 | 4,8,33,34,<br>35,36,37,3<br>8 | 8  | B0BNN3,P00762,P01835,P36374,P52590,P82471,Q6AY61,Q91XN4                                                  |
| 532 | 1,2,3,5,6,8<br>,33,34 | 4,7,35,36,<br>37,38,39,4<br>0 | 14 | O54800;Q5DWV2,O54858,O89117,P52590,P80202,Q05702,Q09030,Q5I0D7,Q6IG05,Q91XN4,Q99MH3,Q99PP0,Q9QZQ5,Q9Z2L0 |
| 533 | 1,2,3,5,6,8<br>,33,35 | 4,7,34,36,<br>37,38,39,4<br>0 | 9  | O54800;Q5DWV2,P36374,P52590,P80202,P85971,Q09030,Q6IG05,Q91XN4,Q99MH3                                    |
| 534 | 1,2,3,5,6,8<br>,33,36 | 4,7,34,35,<br>37,38,39,4<br>0 | 12 | O54800;Q5DWV2,P00714,P08649,P16636,P52590,P80202,Q09030,Q6IG05,Q91XN4,Q99MH3,Q99PP0,Q9QZQ5               |
| 535 | 1,2,3,5,6,8<br>,33,37 | 4,7,34,35,<br>36,38,39,4<br>0 | 10 | D3ZTX0,O54800;Q5DWV2,P52590,P80202,P82471,Q09030,Q6IG05,Q91XN4,Q99MH3,Q9JJ50                             |
| 536 | 1,2,3,5,6,8<br>,33,38 | 4,7,34,35,<br>36,37,39,4<br>0 | 8  | O54800;Q5DWV2,P52590,P80202,Q09030,Q6IFU7,Q6IG05,Q91XN4,Q99MH3                                           |
| 537 | 1,2,3,5,6,8<br>,33,39 | 4,7,34,35,<br>36,37,38,4<br>0 | 8  | O54800;Q5DWV2,P00714,P36376,P52590,P80202,Q09030,Q91XN4,Q99MH3                                           |
| 538 | 1,2,3,5,6,8<br>,33,40 | 4,7,34,35,<br>36,37,38,3<br>9 | 10 | O54800;Q5DWV2,P00731,P25031,P52590,P80202,P82471,Q09030,Q6IG05,Q91XN4,Q99MH3                             |
| 539 | 1,2,3,5,6,8<br>,34,35 | 4,7,33,36,<br>37,38,39,4<br>0 | 9  | P36374,P52590,P80202,P97580,Q09030,Q30KJ2,Q5I0D7,Q6IG05,Q91XN4                                           |
| 540 | 1,2,3,5,6,8<br>,34,36 | 4,7,33,35,<br>37,38,39,4<br>0 | 12 | P00714,P08649,P52590,P80202,P97615,Q09030,Q5I0D7,Q6IG05,Q8K4G9,Q91XN4,Q99MH3,Q9JJ50                      |
| 541 | 1,2,3,5,6,8<br>,34,37 | 4,7,33,35,<br>36,38,39,4<br>0 | 6  | P52590,Q09030,Q6AYR8,Q6IG05,Q91XN4,Q9JJ50                                                                |
| 542 | 1,2,3,5,6,8<br>,34,38 | 4,7,33,35,<br>36,37,39,4<br>0 | 8  | P01946,P02091,P36374,P97580,Q09030,Q30KJ2,Q6IG05,Q91XN4                                                  |

|     |                       |                               |    |                                                                       |
|-----|-----------------------|-------------------------------|----|-----------------------------------------------------------------------|
| 543 | 1,2,3,5,6,8<br>,34,39 | 4,7,33,35,<br>36,37,38,4<br>0 | 10 | P00714,P36374,P36376,P80202,P97580,Q09030,Q30KJ2,Q8K4G9,Q91XN4,Q99MH3 |
| 544 | 1,2,3,5,6,8<br>,34,40 | 4,7,33,35,<br>36,37,38,3<br>9 | 10 | P15399,P36374,P52590,P80202,P97580,Q09030,Q30KJ2,Q6IG05,Q91XN4,Q9JJ50 |
| 545 | 1,2,3,5,6,8<br>,35,36 | 4,7,33,34,<br>37,38,39,4<br>0 | 8  | P19218,P36374,P52590,P53792,P82471,Q09030,Q64093,Q91XN4               |
| 546 | 1,2,3,5,6,8<br>,35,37 | 4,7,33,34,<br>36,38,39,4<br>0 | 6  | F1M3L7,P19218,P52590,P82471,Q09030,Q64093                             |
| 547 | 1,2,3,5,6,8<br>,35,38 | 4,7,33,34,<br>36,37,39,4<br>0 | 9  | P19218,P19814,P24368,P36374,P36376,P82471,Q09030,Q5I0J9,Q6IG05        |
| 548 | 1,2,3,5,6,8<br>,35,39 | 4,7,33,34,<br>36,37,38,4<br>0 | 5  | P23593,P36374,P36376,P82471,Q09030                                    |
| 549 | 1,2,3,5,6,8<br>,35,40 | 4,7,33,34,<br>36,37,38,3<br>9 | 8  | P36374,P36376,P52590,P80202,P82471,Q09030,Q64093,Q91XN4               |
| 550 | 1,2,3,5,6,8<br>,36,37 | 4,7,33,34,<br>35,38,39,4<br>0 | 9  | F1M3L7,P09656,P19218,P52590,P55091,P82471,Q09030,Q91XN4,Q9JJ50        |
| 551 | 1,2,3,5,6,8<br>,36,38 | 4,7,33,34,<br>35,37,39,4<br>0 | 6  | P19218,P36374,P52590,Q09030,Q6IG05,Q91XN4                             |
| 552 | 1,2,3,5,6,8<br>,36,39 | 4,7,33,34,<br>35,37,38,4<br>0 | 10 | B0BNN3,P00714,P36376,P52590,P82471,Q09030,Q8K4G9,Q91XN4,Q99MH3,Q9R168 |
| 553 | 1,2,3,5,6,8<br>,36,40 | 4,7,33,34,<br>35,37,38,3<br>9 | 8  | B0BNN3,P52590,P53792,P80202,P82471,Q09030,Q91XN4,Q9JJ50               |
| 554 | 1,2,3,5,6,8<br>,37,38 | 4,7,33,34,<br>35,36,39,4<br>0 | 4  | P19218,P82471,Q6IG05,Q91XN4                                           |
| 555 | 1,2,3,5,6,8<br>,37,39 | 4,7,33,34,<br>35,36,38,4<br>0 | 4  | P00714,P36376,P82471,Q9R168                                           |

|     |                        |                               |    |                                                                                                   |
|-----|------------------------|-------------------------------|----|---------------------------------------------------------------------------------------------------|
| 556 | 1,2,3,5,6,8<br>,37,40  | 4,7,33,34,<br>35,36,38,3<br>9 | 5  | P52590,P82471,Q09030,Q91XN4,Q9JJ50                                                                |
| 557 | 1,2,3,5,6,8<br>,38,39  | 4,7,33,34,<br>35,36,37,4<br>0 | 5  | P24368,P36374,P36376,Q09030,Q6IG05                                                                |
| 558 | 1,2,3,5,6,8<br>,38,40  | 4,7,33,34,<br>35,36,37,3<br>9 | 9  | P25031,P36374,P36376,P52590,P82471,Q09030,Q6IG05,Q6P6R2,Q91XN4                                    |
| 559 | 1,2,3,5,6,8<br>,39,40  | 4,7,33,34,<br>35,36,37,3<br>8 | 10 | B0BNN3,P25031,P36374,P36376,P52590,P80202,P82471,Q09030,Q91XN4,Q9R168                             |
| 560 | 1,2,3,5,6,3<br>3,34,35 | 4,7,8,36,3<br>7,38,39,40      | 10 | O54800;Q5DWV2,O89117,P08721,P52590,Q09030,Q5I0D7,Q812E4,Q91XN4,Q99MH3,Q9Z2L0                      |
| 561 | 1,2,3,5,6,3<br>3,34,36 | 4,7,8,35,3<br>7,38,39,40      | 13 | O54800;Q5DWV2,P08721,P52590,P97584,P98089,Q09030,Q5I0D7,Q5QE79,Q62635,Q91XN4,Q99041,Q99MH3,Q9Z2L0 |
| 562 | 1,2,3,5,6,3<br>3,34,37 | 4,7,8,35,3<br>6,38,39,40      | 10 | O54800;Q5DWV2,P52590,P98089,Q09030,Q5I0D7,Q62635,Q6AY61,Q91XN4,Q99MH3,Q9JJ50                      |
| 563 | 1,2,3,5,6,3<br>3,34,38 | 4,7,8,35,3<br>6,37,39,40      | 11 | O54800;Q5DWV2,P01946,P02091,P52590,P60905,Q09030,Q6AY61,Q812E4,Q91XN4,Q99MH3,Q9Z2L0               |
| 564 | 1,2,3,5,6,3<br>3,34,39 | 4,7,8,35,3<br>6,37,38,40      | 7  | O54800;Q5DWV2,P00714,P52590,Q09030,Q99041,Q99MH3,Q9Z2L0                                           |
| 565 | 1,2,3,5,6,3<br>3,34,40 | 4,7,8,35,3<br>6,37,38,39      | 8  | O54800;Q5DWV2,P01039,P52590,Q09030,Q6AY61,Q91XN4,Q99MH3,Q9Z2L0                                    |
| 566 | 1,2,3,5,6,3<br>3,35,36 | 4,7,8,34,3<br>7,38,39,40      | 11 | D4A5U3,P08721,P49134,P52590,P53792,Q09030,Q5I0D7,Q5RKI7,Q91XN4,Q99MH3,Q9Z0V6                      |
| 567 | 1,2,3,5,6,3<br>3,35,37 | 4,7,8,34,3<br>6,38,39,40      | 5  | F1M3L7,P52590,Q09030,Q64093,Q8CIZ5                                                                |
| 568 | 1,2,3,5,6,3<br>3,35,38 | 4,7,8,34,3<br>6,37,39,40      | 9  | O54800;Q5DWV2,P22282,P49134,P52590,Q09030,Q5I0J9,Q6P6R2,Q812E4,Q9Z2L0                             |
| 569 | 1,2,3,5,6,3<br>3,35,39 | 4,7,8,34,3<br>6,37,38,40      | 5  | P30120,P62804,Q09030,Q99MH3,Q9Z2L0                                                                |
| 570 | 1,2,3,5,6,3<br>3,35,40 | 4,7,8,34,3<br>6,37,38,39      | 6  | P22282,P52590,P53792,Q09030,Q6P6R2,Q9EQS0                                                         |
| 571 | 1,2,3,5,6,3<br>3,36,37 | 4,7,8,34,3<br>5,38,39,40      | 14 | D3ZTX0,D4A5U3,P09656,P11883,P52590,P98089,Q05695,Q09030,Q62635,Q8CIZ5,Q91XN4,Q99MH3,Q9JJ50,Q9Z0V6 |
| 572 | 1,2,3,5,6,3<br>3,36,38 | 4,7,8,34,3<br>5,37,39,40      | 8  | O54800;Q5DWV2,P22282,P52590,Q09030,Q91XN4,Q923V8,Q99MH3,Q9Z0V6                                    |
| 573 | 1,2,3,5,6,3<br>3,36,39 | 4,7,8,34,3<br>5,37,38,40      | 5  | P00714,P52590,Q09030,Q99041,Q99MH3                                                                |



|     |                        |                          |    |                                                                                     |
|-----|------------------------|--------------------------|----|-------------------------------------------------------------------------------------|
| 574 | 1,2,3,5,6,3<br>3,36,40 | 4,7,8,34,3<br>5,37,38,39 | 7  | P52590,P53792,Q09030,Q91XN4,Q99MH3,Q9WTT6,Q9Z0V6                                    |
| 575 | 1,2,3,5,6,3<br>3,37,38 | 4,7,8,34,3<br>5,36,39,40 | 4  | O54800;Q5DWV2,P52590,Q09030,Q6AY61                                                  |
| 576 | 1,2,3,5,6,3<br>3,37,39 | 4,7,8,34,3<br>5,36,38,40 | 4  | D3ZTX0,Q09030,Q6AY61,Q99MH3                                                         |
| 577 | 1,2,3,5,6,3<br>3,37,40 | 4,7,8,34,3<br>5,36,38,39 | 6  | P52590,P82471,Q09030,Q62714,Q6AY61,Q9Z0V6                                           |
| 578 | 1,2,3,5,6,3<br>3,38,39 | 4,7,8,34,3<br>5,36,37,40 | 5  | O54800;Q5DWV2,P22282,Q09030,Q99041,Q99MH3                                           |
| 579 | 1,2,3,5,6,3<br>3,38,40 | 4,7,8,34,3<br>5,36,37,39 | 10 | O54800;Q5DWV2,P01039,P22282,P52590,Q09030,Q62714,Q6P6R2,Q91XN4,Q9QX74,Q9Z0V6        |
| 580 | 1,2,3,5,6,3<br>3,39,40 | 4,7,8,34,3<br>5,36,37,38 | 4  | P01039,P52590,Q09030,Q99MH3                                                         |
| 581 | 1,2,3,5,6,3<br>4,35,36 | 4,7,8,33,3<br>7,38,39,40 | 5  | P21674,P52590,P53792,Q5I0D7,Q9QWN8                                                  |
| 582 | 1,2,3,5,6,3<br>4,35,37 | 4,7,8,33,3<br>6,38,39,40 | 0  |                                                                                     |
| 583 | 1,2,3,5,6,3<br>4,35,38 | 4,7,8,33,3<br>6,37,39,40 | 12 | P01946,P02091,P02782,P08723,P0C0A9,P30120,P36374,Q4TU93,Q5I0J9,Q812E4,Q9QWN8,Q9Z2L0 |
| 584 | 1,2,3,5,6,3<br>4,35,39 | 4,7,8,33,3<br>6,37,38,40 | 4  | P08723,P30120,P36374,Q9Z2L0                                                         |
| 585 | 1,2,3,5,6,3<br>4,35,40 | 4,7,8,33,3<br>6,37,38,39 | 3  | P08723,P36374,P52590                                                                |
| 586 | 1,2,3,5,6,3<br>4,36,37 | 4,7,8,33,3<br>5,38,39,40 | 8  | P09656,P47967,P52590,P55091,P98089,Q05695,Q62635,Q9JJ50                             |
| 587 | 1,2,3,5,6,3<br>4,36,38 | 4,7,8,33,3<br>5,37,39,40 | 5  | P01946,P02091,P52590,Q91XN4,Q9QWN8                                                  |
| 588 | 1,2,3,5,6,3<br>4,36,39 | 4,7,8,33,3<br>5,37,38,40 | 6  | B0BNN3,P00714,P52590,Q8K4G9,Q99041,Q99MH3                                           |
| 589 | 1,2,3,5,6,3<br>4,36,40 | 4,7,8,33,3<br>5,37,38,39 | 4  | P52590,P53792,Q91XN4,Q9JJ50                                                         |
| 590 | 1,2,3,5,6,3<br>4,37,38 | 4,7,8,33,3<br>5,36,39,40 | 6  | P01835,P01946,P02091,Q4KLZ6,Q6AY61,Q9JJ50                                           |
| 591 | 1,2,3,5,6,3<br>4,37,39 | 4,7,8,33,3<br>5,36,38,40 | 2  | P01835,Q6AY61                                                                       |
| 592 | 1,2,3,5,6,3<br>4,37,40 | 4,7,8,33,3<br>5,36,38,39 | 6  | P01835,P20767,P52590,Q62714,Q6AY61,Q9JJ50                                           |
| 593 | 1,2,3,5,6,3<br>4,38,39 | 4,7,8,33,3<br>5,36,37,40 | 7  | P01946,P02091,P08723,P0C0A9,P36374,P60905,Q6AY61                                    |

|     |                        |                          |    |                                                                                     |
|-----|------------------------|--------------------------|----|-------------------------------------------------------------------------------------|
| 594 | 1,2,3,5,6,3<br>4,38,40 | 4,7,8,33,3<br>5,36,37,39 | 9  | P01946,P02091,P08723,P0C0A9,P36374,P52590,P97580,Q6AY61,Q6P6R2                      |
| 595 | 1,2,3,5,6,3<br>4,39,40 | 4,7,8,33,3<br>5,36,37,38 | 3  | P08723,P52590,Q6AY61                                                                |
| 596 | 1,2,3,5,6,3<br>5,36,37 | 4,7,8,33,3<br>4,38,39,40 | 12 | D4A5U3,F1M3L7,P09656,P19132,P19218,P25236,P52590,P53792,P82471,Q64093,Q8CIZ5,Q9Z0V6 |
| 597 | 1,2,3,5,6,3<br>5,36,38 | 4,7,8,33,3<br>4,37,39,40 | 12 | P0C0A9,P19218,P19814,P21674,P22282,P24368,P52590,P53792,Q5I0J9,Q923V8,Q9QWN8,Q9Z0V6 |
| 598 | 1,2,3,5,6,3<br>5,36,39 | 4,7,8,33,3<br>4,37,38,40 | 5  | B0BNN3,P24368,P30120,P52590,P53792                                                  |
| 599 | 1,2,3,5,6,3<br>5,36,40 | 4,7,8,33,3<br>4,37,38,39 | 8  | P02793;Q7TP54,P20646,P52590,P53792,P82471,Q64093,Q9EQS0,Q9Z0V6                      |
| 600 | 1,2,3,5,6,3<br>5,37,38 | 4,7,8,33,3<br>4,36,39,40 | 6  | P19218,P19814,P20646,P82471,Q5I0J9,Q9QX74                                           |
| 601 | 1,2,3,5,6,3<br>5,37,39 | 4,7,8,33,3<br>4,36,38,40 | 3  | P20646,P30919,P82471                                                                |
| 602 | 1,2,3,5,6,3<br>5,37,40 | 4,7,8,33,3<br>4,36,38,39 | 8  | P19132,P20646,P52590,P53792,P82471,Q64093,Q9QX74,Q9Z0V6                             |
| 603 | 1,2,3,5,6,3<br>5,38,39 | 4,7,8,33,3<br>4,36,37,40 | 12 | P08723,P0C0A9,P19814,P20646,P22282,P24368,P30120,P36374,P47727,P62898,Q6P6R2,Q9QX74 |
| 604 | 1,2,3,5,6,3<br>5,38,40 | 4,7,8,33,3<br>4,36,37,39 | 12 | P08723,P0C0A9,P19814,P20646,P22282,P36374,P52590,P53792,P82471,Q5I0J9,Q6P6R2,Q9QX74 |
| 605 | 1,2,3,5,6,3<br>5,39,40 | 4,7,8,33,3<br>4,36,37,38 | 7  | P08723,P0C0A9,P20646,P36374,P82471,Q6P6R2,Q9QX74                                    |
| 606 | 1,2,3,5,6,3<br>6,37,38 | 4,7,8,33,3<br>4,35,39,40 | 8  | P01835,P09656,P19218,P52590,P82471,Q9JJ50,Q9QX74,Q9Z0V6                             |
| 607 | 1,2,3,5,6,3<br>6,37,39 | 4,7,8,33,3<br>4,35,38,40 | 4  | P00714,P09656,P52590,P82471                                                         |
| 608 | 1,2,3,5,6,3<br>6,37,40 | 4,7,8,33,3<br>4,35,38,39 | 8  | P01835,P09656,P52590,P53792,P82471,Q9JJ50,Q9QX74,Q9Z0V6                             |
| 609 | 1,2,3,5,6,3<br>6,38,39 | 4,7,8,33,3<br>4,35,37,40 | 6  | P00714,P0C0A9,P22282,P24368,Q923V8,Q9QX74                                           |
| 610 | 1,2,3,5,6,3<br>6,38,40 | 4,7,8,33,3<br>4,35,37,39 | 8  | P0C0A9,P22282,P52590,P53792,P82471,Q9QWN8,Q9QX74,Q9Z0V6                             |
| 611 | 1,2,3,5,6,3<br>6,39,40 | 4,7,8,33,3<br>4,35,37,38 | 4  | B0BNN3,P52590,P82471,Q9QX74                                                         |
| 612 | 1,2,3,5,6,3<br>7,38,39 | 4,7,8,33,3<br>4,35,36,40 | 4  | P01835,P82471,Q6AY61,Q9QX74                                                         |
| 613 | 1,2,3,5,6,3<br>7,38,40 | 4,7,8,33,3<br>4,35,36,39 | 9  | P01835,P20646,P20767,P52590,P82471,Q62714,Q6AY61,Q9QX74,Q9Z0V6                      |

|     |                        |                               |    |                                                                              |
|-----|------------------------|-------------------------------|----|------------------------------------------------------------------------------|
| 614 | 1,2,3,5,6,3<br>7,39,40 | 4,7,8,33,3<br>4,35,36,38      | 6  | P00762,P01835,P52590,P82471,Q6AY61,Q9QX74                                    |
| 615 | 1,2,3,5,6,3<br>8,39,40 | 4,7,8,33,3<br>4,35,36,37      | 10 | P08723,P0C0A9,P20646,P22282,P36374,P51740,P82471,Q6AY61,Q6P6R2,Q9QX74        |
| 616 | 1,2,3,5,7,8<br>,33,34  | 4,6,35,36,<br>37,38,39,4<br>0 | 4  | B1H234,P51740,Q6IG05,Q99MH3                                                  |
| 617 | 1,2,3,5,7,8<br>,33,35  | 4,6,34,36,<br>37,38,39,4<br>0 | 1  | P51740                                                                       |
| 618 | 1,2,3,5,7,8<br>,33,36  | 4,6,34,35,<br>37,38,39,4<br>0 | 7  | B1H234,P00714,P01681,P47967,P51740,Q09030,Q99MH3                             |
| 619 | 1,2,3,5,7,8<br>,33,37  | 4,6,34,35,<br>36,38,39,4<br>0 | 6  | B1H234,P47967,P51740,Q6AYQ8,Q6AYR8,Q6IG05                                    |
| 620 | 1,2,3,5,7,8<br>,33,38  | 4,6,34,35,<br>36,37,39,4<br>0 | 3  | B1H234,P35280,Q6IG05                                                         |
| 621 | 1,2,3,5,7,8<br>,33,39  | 4,6,34,35,<br>36,37,38,4<br>0 | 4  | P00714,P36376,Q5RKI1,Q6AYQ8                                                  |
| 622 | 1,2,3,5,7,8<br>,33,40  | 4,6,34,35,<br>36,37,38,3<br>9 | 1  | P00731                                                                       |
| 623 | 1,2,3,5,7,8<br>,34,35  | 4,6,33,36,<br>37,38,39,4<br>0 | 7  | B1H234,P20766,P36374,P36860,P47967,P51740,Q9Z1F2                             |
| 624 | 1,2,3,5,7,8<br>,34,36  | 4,6,33,35,<br>37,38,39,4<br>0 | 11 | B1H234,P00714,P20766,P47967,P51740,P55091,P97615,Q66H69,Q6IG05,Q9JJ50,Q9Z1F2 |
| 625 | 1,2,3,5,7,8<br>,34,37  | 4,6,33,35,<br>36,38,39,4<br>0 | 10 | B1H234,P06760,P47967,P51740,P55091,Q66H69,Q6AY61,Q6AYR8,Q6IG05,Q9JJ50        |
| 626 | 1,2,3,5,7,8<br>,34,38  | 4,6,33,35,<br>36,37,39,4<br>0 | 9  | B1H234,P01946,P02091,P20766,P35280,P36374,P60905,Q6AY61,Q6IG05               |
| 627 | 1,2,3,5,7,8<br>,34,39  | 4,6,33,35,<br>36,37,38,4<br>0 | 7  | P00714,P20762,P20766,P36374,P36376,Q9Z0V6,Q9Z1F2                             |

|     |                       |                               |                                                           |
|-----|-----------------------|-------------------------------|-----------------------------------------------------------|
| 628 | 1,2,3,5,7,8<br>,34,40 | 4,6,33,35,<br>36,37,38,3<br>9 | 4 P20766,P36374,P97580,Q9WUW8                             |
| 629 | 1,2,3,5,7,8<br>,35,36 | 4,6,33,34,<br>37,38,39,4<br>0 | 6 P19218,P36374,P47967,P51740,P97840,Q5I0D1               |
| 630 | 1,2,3,5,7,8<br>,35,37 | 4,6,33,34,<br>36,38,39,4<br>0 | 7 F1M3L7,P19218,P36860,P47967,P51740,Q66H69,Q6AYR8        |
| 631 | 1,2,3,5,7,8<br>,35,38 | 4,6,33,34,<br>36,37,39,4<br>0 | 5 P19218,P19814,P35280,P36374,Q6IG05                      |
| 632 | 1,2,3,5,7,8<br>,35,39 | 4,6,33,34,<br>36,37,38,4<br>0 | 4 P36374,P36376,P36860,Q9Z1F2                             |
| 633 | 1,2,3,5,7,8<br>,35,40 | 4,6,33,34,<br>36,37,38,3<br>9 | 1 P36374                                                  |
| 634 | 1,2,3,5,7,8<br>,36,37 | 4,6,33,34,<br>35,38,39,4<br>0 | 8 P47967,P51740,P55091,P97840,Q5I0D1,Q66H69,Q6AYR8,Q9JJ50 |
| 635 | 1,2,3,5,7,8<br>,36,38 | 4,6,33,34,<br>35,37,39,4<br>0 | 6 B1H234,P19218,P35280,P36374,P47967,Q6IG05               |
| 636 | 1,2,3,5,7,8<br>,36,39 | 4,6,33,34,<br>35,37,38,4<br>0 | 4 B0BNN3,P00714,P36376,Q9Z1F2                             |
| 637 | 1,2,3,5,7,8<br>,36,40 | 4,6,33,34,<br>35,37,38,3<br>9 | 0                                                         |
| 638 | 1,2,3,5,7,8<br>,37,38 | 4,6,33,34,<br>35,36,39,4<br>0 | 7 B1H234,P19218,P22006,P35280,Q6AY61,Q6IFW6,Q6IG05        |
| 639 | 1,2,3,5,7,8<br>,37,39 | 4,6,33,34,<br>35,36,38,4<br>0 | 5 P00714,P36376,P63029,Q6AY61,Q6AYQ8                      |
| 640 | 1,2,3,5,7,8<br>,37,40 | 4,6,33,34,<br>35,36,38,3<br>9 | 6 D3ZUC6,P22006,P82471,Q66H69,Q6AY61,Q6AYR8               |

|     |                        |                               |                                                                  |
|-----|------------------------|-------------------------------|------------------------------------------------------------------|
| 641 | 1,2,3,5,7,8<br>,38,39  | 4,6,33,34,<br>35,36,37,4<br>0 | 7 P02770,P11883,P35280,P36374,P36376,Q63556,Q6IG05               |
| 642 | 1,2,3,5,7,8<br>,38,40  | 4,6,33,34,<br>35,36,37,3<br>9 | 4 P22006,P35280,P36374,Q6IG05                                    |
| 643 | 1,2,3,5,7,8<br>,39,40  | 4,6,33,34,<br>35,36,37,3<br>8 | 2 P36374,P36376                                                  |
| 644 | 1,2,3,5,7,3<br>3,34,35 | 4,6,8,36,3<br>7,38,39,40      | 8 P06911,P08721,P12020,P19629,P47967,P51740,Q5GRG2,Q5IOD7        |
| 645 | 1,2,3,5,7,3<br>3,34,36 | 4,6,8,35,3<br>7,38,39,40      | 9 P08721,P47967,P51740,P98089,Q5IOD7,Q62635,Q99041,Q99MH3,Q9WUW8 |
| 646 | 1,2,3,5,7,3<br>3,34,37 | 4,6,8,35,3<br>6,38,39,40      | 8 P47967,P51740,P54921,P98089,Q62635,Q6AY61,Q6AYQ8,Q9WUW8        |
| 647 | 1,2,3,5,7,3<br>3,34,38 | 4,6,8,35,3<br>6,37,39,40      | 6 P01946,P02091,P60905,P80299,Q6AY61,Q9WUW8                      |
| 648 | 1,2,3,5,7,3<br>3,34,39 | 4,6,8,35,3<br>6,37,38,40      | 8 P00714,P20766,P60905,Q5RKI1,Q6AY61,Q6AYQ8,Q99041,Q99MH3        |
| 649 | 1,2,3,5,7,3<br>3,34,40 | 4,6,8,35,3<br>6,37,38,39      | 2 Q6AY61,Q9WUW8                                                  |
| 650 | 1,2,3,5,7,3<br>3,35,36 | 4,6,8,34,3<br>7,38,39,40      | 5 P08721,P47967,P49134,P51740,P97840                             |
| 651 | 1,2,3,5,7,3<br>3,35,37 | 4,6,8,34,3<br>6,38,39,40      | 2 P47967,P51740                                                  |
| 652 | 1,2,3,5,7,3<br>3,35,38 | 4,6,8,34,3<br>6,37,39,40      | 3 P12020,P13432,P22282                                           |
| 653 | 1,2,3,5,7,3<br>3,35,39 | 4,6,8,34,3<br>6,37,38,40      | 2 P12020,Q5RKI1                                                  |
| 654 | 1,2,3,5,7,3<br>3,35,40 | 4,6,8,34,3<br>6,37,38,39      | 0                                                                |
| 655 | 1,2,3,5,7,3<br>3,36,37 | 4,6,8,34,3<br>5,38,39,40      | 6 P47967,P51740,P55091,P97840,P98089,Q62635                      |
| 656 | 1,2,3,5,7,3<br>3,36,38 | 4,6,8,34,3<br>5,37,39,40      | 2 P47967,Q923V8                                                  |
| 657 | 1,2,3,5,7,3<br>3,36,39 | 4,6,8,34,3<br>5,37,38,40      | 4 P00714,Q5RKI1,Q99041,Q99MH3                                    |
| 658 | 1,2,3,5,7,3<br>3,36,40 | 4,6,8,34,3<br>5,37,38,39      | 1 P01681                                                         |
| 659 | 1,2,3,5,7,3<br>3,37,38 | 4,6,8,34,3<br>5,36,39,40      | 2 P47967,Q6AY61                                                  |

|     |                        |                          |   |                                                                |
|-----|------------------------|--------------------------|---|----------------------------------------------------------------|
| 660 | 1,2,3,5,7,3<br>3,37,39 | 4,6,8,34,3<br>5,36,38,40 | 4 | P00714,Q5RKI1,Q6AY61,Q6AYQ8                                    |
| 661 | 1,2,3,5,7,3<br>3,37,40 | 4,6,8,34,3<br>5,36,38,39 | 2 | Q62714,Q6AY61                                                  |
| 662 | 1,2,3,5,7,3<br>3,38,39 | 4,6,8,34,3<br>5,36,37,40 | 7 | P02770,P13432,P60905,Q5RKI1,Q63556,Q6AY61,Q99041               |
| 663 | 1,2,3,5,7,3<br>3,38,40 | 4,6,8,34,3<br>5,36,37,39 | 6 | P01039,P22282,Q62714,Q6AY61,Q6P6R2,Q9WUW8                      |
| 664 | 1,2,3,5,7,3<br>3,39,40 | 4,6,8,34,3<br>5,36,37,38 | 3 | Q5RKI1,Q6AY61,Q6AYQ8                                           |
| 665 | 1,2,3,5,7,3<br>4,35,36 | 4,6,8,33,3<br>7,38,39,40 | 5 | P47967,P51740,P97840,Q5I0D7,Q9QWN8                             |
| 666 | 1,2,3,5,7,3<br>4,35,37 | 4,6,8,33,3<br>6,38,39,40 | 3 | P47967,P51740,Q6AY61                                           |
| 667 | 1,2,3,5,7,3<br>4,35,38 | 4,6,8,33,3<br>6,37,39,40 | 4 | P01946,P02091,P36374,Q9QWN8                                    |
| 668 | 1,2,3,5,7,3<br>4,35,39 | 4,6,8,33,3<br>6,37,38,40 | 3 | P08723,P12020,P20766                                           |
| 669 | 1,2,3,5,7,3<br>4,35,40 | 4,6,8,33,3<br>6,37,38,39 | 1 | P36374                                                         |
| 670 | 1,2,3,5,7,3<br>4,36,37 | 4,6,8,33,3<br>5,38,39,40 | 9 | P47967,P51740,P55091,P97840,P98089,Q05695,Q5I0D1,Q62635,Q9JJ50 |
| 671 | 1,2,3,5,7,3<br>4,36,38 | 4,6,8,33,3<br>5,37,39,40 | 6 | P01946,P02091,P47967,Q5RLM2,Q9QWN8,Q9WUW8                      |
| 672 | 1,2,3,5,7,3<br>4,36,39 | 4,6,8,33,3<br>5,37,38,40 | 4 | P00714,P20766,Q99041,Q9Z1F2                                    |
| 673 | 1,2,3,5,7,3<br>4,36,40 | 4,6,8,33,3<br>5,37,38,39 | 2 | Q9QWN8,Q9WUW8                                                  |
| 674 | 1,2,3,5,7,3<br>4,37,38 | 4,6,8,33,3<br>5,36,39,40 | 8 | P01835,P01946,P02091,P20767,P47967,P54921,Q6AY61,Q9WUW8        |
| 675 | 1,2,3,5,7,3<br>4,37,39 | 4,6,8,33,3<br>5,36,38,40 | 3 | P01835,Q6AY61,Q6AYQ8                                           |
| 676 | 1,2,3,5,7,3<br>4,37,40 | 4,6,8,33,3<br>5,36,38,39 | 6 | P01835,P20767,Q62714,Q6AY61,Q9JJ50,Q9WUW8                      |
| 677 | 1,2,3,5,7,3<br>4,38,39 | 4,6,8,33,3<br>5,36,37,40 | 8 | P01946,P02091,P02770,P08723,P20766,P60905,Q63556,Q6AY61        |
| 678 | 1,2,3,5,7,3<br>4,38,40 | 4,6,8,33,3<br>5,36,37,39 | 6 | P01946,P02091,Q5RLM2,Q6AY61,Q9QWN8,Q9WUW8                      |
| 679 | 1,2,3,5,7,3<br>4,39,40 | 4,6,8,33,3<br>5,36,37,38 | 2 | P20766,Q6AY61                                                  |

|     |                        |                          |    |                                                                       |
|-----|------------------------|--------------------------|----|-----------------------------------------------------------------------|
| 680 | 1,2,3,5,7,3<br>5,36,37 | 4,6,8,33,3<br>4,38,39,40 | 9  | F1M3L7,P19132,P25031,P47967,P51740,P55091,P97840,Q5I0D1,Q9JJS8        |
| 681 | 1,2,3,5,7,3<br>5,36,38 | 4,6,8,33,3<br>4,37,39,40 | 6  | P13432,P19218,P19814,P21674,P47967,Q9QWN8                             |
| 682 | 1,2,3,5,7,3<br>5,36,39 | 4,6,8,33,3<br>4,37,38,40 | 2  | P23739,Q9QWN8                                                         |
| 683 | 1,2,3,5,7,3<br>5,36,40 | 4,6,8,33,3<br>4,37,38,39 | 3  | P02793;Q7TP54,P53792,Q9QWN8                                           |
| 684 | 1,2,3,5,7,3<br>5,37,38 | 4,6,8,33,3<br>4,36,39,40 | 6  | P08494,P08649,P19218,P19814,P47967,Q6AY61                             |
| 685 | 1,2,3,5,7,3<br>5,37,39 | 4,6,8,33,3<br>4,36,38,40 | 1  | P08649                                                                |
| 686 | 1,2,3,5,7,3<br>5,37,40 | 4,6,8,33,3<br>4,36,38,39 | 3  | P08649,P19132,P20767                                                  |
| 687 | 1,2,3,5,7,3<br>5,38,39 | 4,6,8,33,3<br>4,36,37,40 | 10 | P02770,P08649,P08723,P13432,P19814,P24368,P30120,P36374,Q63556,Q9QW07 |
| 688 | 1,2,3,5,7,3<br>5,38,40 | 4,6,8,33,3<br>4,36,37,39 | 7  | P08649,P19814,P22282,P36374,Q62812,Q6P6R2,Q9QWN8                      |
| 689 | 1,2,3,5,7,3<br>5,39,40 | 4,6,8,33,3<br>4,36,37,38 | 3  | P08649,P08723,P36374                                                  |
| 690 | 1,2,3,5,7,3<br>6,37,38 | 4,6,8,33,3<br>4,35,39,40 | 3  | P01835,P47967,P97840                                                  |
| 691 | 1,2,3,5,7,3<br>6,37,39 | 4,6,8,33,3<br>4,35,38,40 | 2  | P00714,P47967                                                         |
| 692 | 1,2,3,5,7,3<br>6,37,40 | 4,6,8,33,3<br>4,35,38,39 | 3  | P01835,P47967,Q9JJ50                                                  |
| 693 | 1,2,3,5,7,3<br>6,38,39 | 4,6,8,33,3<br>4,35,37,40 | 3  | P00714,Q9QW07,Q9QWN8                                                  |
| 694 | 1,2,3,5,7,3<br>6,38,40 | 4,6,8,33,3<br>4,35,37,39 | 3  | P22282,Q5RLM2,Q9QWN8                                                  |
| 695 | 1,2,3,5,7,3<br>6,39,40 | 4,6,8,33,3<br>4,35,37,38 | 1  | B0BNN3                                                                |
| 696 | 1,2,3,5,7,3<br>7,38,39 | 4,6,8,33,3<br>4,35,36,40 | 5  | P01835,P02770,P08494,P08649,Q6AY61                                    |
| 697 | 1,2,3,5,7,3<br>7,38,40 | 4,6,8,33,3<br>4,35,36,39 | 8  | P01835,P08494,P08649,P20767,P22006,Q62714,Q6AY61,Q9QX74               |
| 698 | 1,2,3,5,7,3<br>7,39,40 | 4,6,8,33,3<br>4,35,36,38 | 4  | P00762,P01835,P08649,Q6AY61                                           |
| 699 | 1,2,3,5,7,3<br>8,39,40 | 4,6,8,33,3<br>4,35,36,37 | 9  | O55004,P02770,P08649,P08723,P22282,Q63556,Q6AY61,Q6P6R2,Q9QX74        |

|     |                        |                          |   |                                                                |
|-----|------------------------|--------------------------|---|----------------------------------------------------------------|
| 700 | 1,2,3,5,8,3<br>3,34,35 | 4,6,7,36,3<br>7,38,39,40 | 4 | O89117,P51740,Q6IG05,Q99MH3                                    |
| 701 | 1,2,3,5,8,3<br>3,34,36 | 4,6,7,35,3<br>7,38,39,40 | 9 | P00714,P01681,P51740,P98089,Q5I0D7,Q5QE79,Q6IG05,Q99041,Q99MH3 |
| 702 | 1,2,3,5,8,3<br>3,34,37 | 4,6,7,35,3<br>6,38,39,40 | 4 | P51740,P98089,Q6AYR8,Q6IG05                                    |
| 703 | 1,2,3,5,8,3<br>3,34,38 | 4,6,7,35,3<br>6,37,39,40 | 6 | B1H234,P01946,P02091,Q6IFU7,Q6IG05,Q99041                      |
| 704 | 1,2,3,5,8,3<br>3,34,39 | 4,6,7,35,3<br>6,37,38,40 | 7 | P00714,P02651,P02793;Q7TP54,P36376,Q6IFU7,Q99041,Q99MH3        |
| 705 | 1,2,3,5,8,3<br>3,34,40 | 4,6,7,35,3<br>6,37,38,39 | 4 | P00731,P97580,Q6IFU7,Q6IG05                                    |
| 706 | 1,2,3,5,8,3<br>3,35,36 | 4,6,7,34,3<br>7,38,39,40 | 4 | P00714,P01681,P51740,Q99MH3                                    |
| 707 | 1,2,3,5,8,3<br>3,35,37 | 4,6,7,34,3<br>6,38,39,40 | 2 | F1M3L7,P51740                                                  |
| 708 | 1,2,3,5,8,3<br>3,35,38 | 4,6,7,34,3<br>6,37,39,40 | 1 | Q6IG05                                                         |
| 709 | 1,2,3,5,8,3<br>3,35,39 | 4,6,7,34,3<br>6,37,38,40 | 3 | P00714,P11598,P36376                                           |
| 710 | 1,2,3,5,8,3<br>3,35,40 | 4,6,7,34,3<br>6,37,38,39 | 1 | P01681                                                         |
| 711 | 1,2,3,5,8,3<br>3,36,37 | 4,6,7,34,3<br>5,38,39,40 | 8 | F1M3L7,P00714,P47967,P51740,P55091,P98089,Q05695,Q6IG05        |
| 712 | 1,2,3,5,8,3<br>3,36,38 | 4,6,7,34,3<br>5,37,39,40 | 5 | P00714,P01681,Q6IFU7,Q6IG05,Q99041                             |
| 713 | 1,2,3,5,8,3<br>3,36,39 | 4,6,7,34,3<br>5,37,38,40 | 5 | P00714,P01681,P36376,Q99041,Q99MH3                             |
| 714 | 1,2,3,5,8,3<br>3,36,40 | 4,6,7,34,3<br>5,37,38,39 | 1 | P01681                                                         |
| 715 | 1,2,3,5,8,3<br>3,37,38 | 4,6,7,34,3<br>5,36,39,40 | 2 | P22006,Q6IG05                                                  |
| 716 | 1,2,3,5,8,3<br>3,37,39 | 4,6,7,34,3<br>5,36,38,40 | 3 | P00714,P36376,Q6AYQ8                                           |
| 717 | 1,2,3,5,8,3<br>3,37,40 | 4,6,7,34,3<br>5,36,38,39 | 0 |                                                                |
| 718 | 1,2,3,5,8,3<br>3,38,39 | 4,6,7,34,3<br>5,36,37,40 | 6 | P00714,P19132,P36376,Q6IFU7,Q6IG05,Q99041                      |
| 719 | 1,2,3,5,8,3<br>3,38,40 | 4,6,7,34,3<br>5,36,37,39 | 2 | Q6IFU7,Q6IG05                                                  |



|     |                        |                          |   |                                                                |
|-----|------------------------|--------------------------|---|----------------------------------------------------------------|
| 720 | 1,2,3,5,8,3<br>3,39,40 | 4,6,7,34,3<br>5,36,37,38 | 2 | P01681,P36376                                                  |
| 721 | 1,2,3,5,8,3<br>4,35,36 | 4,6,7,33,3<br>7,38,39,40 | 1 | P51740                                                         |
| 722 | 1,2,3,5,8,3<br>4,35,37 | 4,6,7,33,3<br>6,38,39,40 | 4 | F1M3L7,P36860,P51740,Q6IG05                                    |
| 723 | 1,2,3,5,8,3<br>4,35,38 | 4,6,7,33,3<br>6,37,39,40 | 5 | P01946,P02091,P36374,P97580,Q6IG05                             |
| 724 | 1,2,3,5,8,3<br>4,35,39 | 4,6,7,33,3<br>6,37,38,40 | 3 | P00714,P36376,P36860                                           |
| 725 | 1,2,3,5,8,3<br>4,35,40 | 4,6,7,33,3<br>6,37,38,39 | 2 | P97580,Q30KJ2                                                  |
| 726 | 1,2,3,5,8,3<br>4,36,37 | 4,6,7,33,3<br>5,38,39,40 | 9 | P00714,P47967,P51740,P55091,P98089,Q05695,Q6AYR8,Q6IG05,Q9JJ50 |
| 727 | 1,2,3,5,8,3<br>4,36,38 | 4,6,7,33,3<br>5,37,39,40 | 3 | P01946,P02091,Q6IG05                                           |
| 728 | 1,2,3,5,8,3<br>4,36,39 | 4,6,7,33,3<br>5,37,38,40 | 4 | P00714,P36376,Q99041,Q9Z1F2                                    |
| 729 | 1,2,3,5,8,3<br>4,36,40 | 4,6,7,33,3<br>5,37,38,39 | 1 | P97580                                                         |
| 730 | 1,2,3,5,8,3<br>4,37,38 | 4,6,7,33,3<br>5,36,39,40 | 6 | P01946,P02091,Q6IFU8,Q6IFW6,Q6IG05,Q6IMF3                      |
| 731 | 1,2,3,5,8,3<br>4,37,39 | 4,6,7,33,3<br>5,36,38,40 | 2 | P00714,P36376                                                  |
| 732 | 1,2,3,5,8,3<br>4,37,40 | 4,6,7,33,3<br>5,36,38,39 | 3 | P97580,Q6AYR8,Q6IG05                                           |
| 733 | 1,2,3,5,8,3<br>4,38,39 | 4,6,7,33,3<br>5,36,37,40 | 7 | P00714,P01946,P02091,P36376,P97580,Q6IFU7,Q6IG05               |
| 734 | 1,2,3,5,8,3<br>4,38,40 | 4,6,7,33,3<br>5,36,37,39 | 7 | P01946,P02091,P15399,P97580,Q30KJ2,Q6IFU7,Q6IG05               |
| 735 | 1,2,3,5,8,3<br>4,39,40 | 4,6,7,33,3<br>5,36,37,38 | 3 | P36376,P97580,Q30KJ2                                           |
| 736 | 1,2,3,5,8,3<br>5,36,37 | 4,6,7,33,3<br>4,38,39,40 | 4 | F1M3L7,P47967,P51740,P55091                                    |
| 737 | 1,2,3,5,8,3<br>5,36,38 | 4,6,7,33,3<br>4,37,39,40 | 4 | P19218,P19814,P21674,Q6IG05                                    |
| 738 | 1,2,3,5,8,3<br>5,36,39 | 4,6,7,33,3<br>4,37,38,40 | 3 | P00714,P23739,P36376                                           |
| 739 | 1,2,3,5,8,3<br>5,36,40 | 4,6,7,33,3<br>4,37,38,39 | 1 | P82471                                                         |

|     |                         |                          |    |                                                                                                   |
|-----|-------------------------|--------------------------|----|---------------------------------------------------------------------------------------------------|
| 740 | 1,2,3,5,8,3<br>5,37,38  | 4,6,7,33,3<br>4,36,39,40 | 4  | F1M3L7,P19218,P19814,Q6IG05                                                                       |
| 741 | 1,2,3,5,8,3<br>5,37,39  | 4,6,7,33,3<br>4,36,38,40 | 3  | F1M3L7,P36376,P80299                                                                              |
| 742 | 1,2,3,5,8,3<br>5,37,40  | 4,6,7,33,3<br>4,36,38,39 | 3  | F1M3L7,P80299,P82471                                                                              |
| 743 | 1,2,3,5,8,3<br>5,38,39  | 4,6,7,33,3<br>4,36,37,40 | 6  | P08723,P0C0A9,P11598,P24368,P36374,P36376                                                         |
| 744 | 1,2,3,5,8,3<br>5,38,40  | 4,6,7,33,3<br>4,36,37,39 | 5  | P0C0A9,P11598,P19814,P36374,Q6IG05                                                                |
| 745 | 1,2,3,5,8,3<br>5,39,40  | 4,6,7,33,3<br>4,36,37,38 | 3  | P11598,P36376,P82471                                                                              |
| 746 | 1,2,3,5,8,3<br>6,37,38  | 4,6,7,33,3<br>4,35,39,40 | 3  | F1M3L7,P19218,Q6IG05                                                                              |
| 747 | 1,2,3,5,8,3<br>6,37,39  | 4,6,7,33,3<br>4,35,38,40 | 3  | P00714,P36376,P80299                                                                              |
| 748 | 1,2,3,5,8,3<br>6,37,40  | 4,6,7,33,3<br>4,35,38,39 | 3  | F1M3L7,P80299,P82471                                                                              |
| 749 | 1,2,3,5,8,3<br>6,38,39  | 4,6,7,33,3<br>4,35,37,40 | 3  | P00714,P36376,Q6IG05                                                                              |
| 750 | 1,2,3,5,8,3<br>6,38,40  | 4,6,7,33,3<br>4,35,37,39 | 1  | Q6IG05                                                                                            |
| 751 | 1,2,3,5,8,3<br>6,39,40  | 4,6,7,33,3<br>4,35,37,38 | 4  | B0BNN3,P36376,P82471,Q9R168                                                                       |
| 752 | 1,2,3,5,8,3<br>7,38,39  | 4,6,7,33,3<br>4,35,36,40 | 4  | P08494,P36376,Q6IFW6,Q6IG05                                                                       |
| 753 | 1,2,3,5,8,3<br>7,38,40  | 4,6,7,33,3<br>4,35,36,39 | 4  | P08494,P22006,P82471,Q6IG05                                                                       |
| 754 | 1,2,3,5,8,3<br>7,39,40  | 4,6,7,33,3<br>4,35,36,38 | 3  | P36376,P80299,P82471                                                                              |
| 755 | 1,2,3,5,8,3<br>8,39,40  | 4,6,7,33,3<br>4,35,36,37 | 5  | P11598,P36376,Q63617,Q6IFU7,Q6PCU2                                                                |
| 756 | 1,2,3,5,33,<br>34,35,36 | 4,6,7,8,37,<br>38,39,40  | 10 | D3ZUC6,P08721,P12020,P22273,P22282,P51740,Q5I0D7,Q5QE79,Q99041,Q99MH3                             |
| 757 | 1,2,3,5,33,<br>34,35,37 | 4,6,7,8,36,<br>38,39,40  | 4  | P12020,P22273,P51740,Q5QE79                                                                       |
| 758 | 1,2,3,5,33,<br>34,35,38 | 4,6,7,8,36,<br>37,39,40  | 14 | P01946,P02091,P06911,P0C0A9,P11598,P12020,P22273,P22282,P46462,Q5M8C6,Q63617,Q812E4,Q99041,Q9Z2L0 |
| 759 | 1,2,3,5,33,<br>34,35,39 | 4,6,7,8,36,<br>37,38,40  | 12 | P00714,P06911,P0C0A9,P11598,P12020,P22273,P22282,Q5GRG2,Q63617,Q99041,Q99MH3,Q9Z2L0               |

|     |                                              |    |                                                                                                   |
|-----|----------------------------------------------|----|---------------------------------------------------------------------------------------------------|
| 760 | 1,2,3,5,33, 4,6,7,8,36,<br>34,35,40 37,38,39 | 8  | P06911,P0C0A9,P12020,P22273,P22282,Q5M8C6,Q63617,Q99041                                           |
| 761 | 1,2,3,5,33, 4,6,7,8,35,<br>34,36,37 38,39,40 | 11 | P22273,P47967,P51740,P54921,P55091,P98089,Q05695,Q5QE79,Q62635,Q99041,Q99MH3                      |
| 762 | 1,2,3,5,33, 4,6,7,8,35,<br>34,36,38 37,39,40 | 6  | P01946,P02091,P22273,P22282,Q63617,Q99041                                                         |
| 763 | 1,2,3,5,33, 4,6,7,8,35,<br>34,36,39 37,38,40 | 6  | P00714,P22273,P22282,Q63617,Q99041,Q99MH3                                                         |
| 764 | 1,2,3,5,33, 4,6,7,8,35,<br>34,36,40 37,38,39 | 6  | P22273,P22282,Q5QE79,Q63617,Q99041,Q99MH3                                                         |
| 765 | 1,2,3,5,33, 4,6,7,8,35,<br>34,37,38 36,39,40 | 5  | P01946,P02091,P54921,Q6AY61,Q99041                                                                |
| 766 | 1,2,3,5,33, 4,6,7,8,35,<br>34,37,39 36,38,40 | 7  | O70417,P00714,P02793;Q7TP54,Q6AY61,Q6AYQ8,Q99041,Q99376                                           |
| 767 | 1,2,3,5,33, 4,6,7,8,35,<br>34,37,40 36,38,39 | 2  | Q62714,Q6AY61                                                                                     |
| 768 | 1,2,3,5,33, 4,6,7,8,35,<br>34,38,39 36,37,40 | 13 | P00714,P01946,P02091,P02793;Q7TP54,P0C0A9,P19132,P22273,P22282,P60905,Q63617,Q6AY61,Q99041,Q9QW07 |
| 769 | 1,2,3,5,33, 4,6,7,8,35,<br>34,38,40 36,37,39 | 10 | P01039,P01946,P02091,P0C0A9,P22273,P22282,Q63617,Q6AY61,Q99041,Q9WUW8                             |
| 770 | 1,2,3,5,33, 4,6,7,8,35,<br>34,39,40 36,37,38 | 7  | P19218,P22273,P22282,Q63617,Q6AY61,Q99041,Q99MH3                                                  |
| 771 | 1,2,3,5,33, 4,6,7,8,34,<br>35,36,37 38,39,40 | 6  | D4A5U3,F1M3L7,P22273,P47967,P51740,Q5QE79                                                         |
| 772 | 1,2,3,5,33, 4,6,7,8,34,<br>35,36,38 37,39,40 | 9  | P0C0A9,P11598,P21674,P22273,P22282,P49134,Q63617,Q99041,Q9QW07                                    |
| 773 | 1,2,3,5,33, 4,6,7,8,34,<br>35,36,39 37,38,40 | 11 | P00714,P0C0A9,P11598,P12020,P22273,P22282,P23739,P49134,Q63617,Q99041,Q99MH3                      |
| 774 | 1,2,3,5,33, 4,6,7,8,34,<br>35,36,40 37,38,39 | 10 | P01681,P0C0A9,P22273,P22282,P49134,P53792,Q63617,Q99041,Q9EQS0,Q9Z0V6                             |
| 775 | 1,2,3,5,33, 4,6,7,8,34,<br>35,37,38 36,39,40 | 1  | P22282                                                                                            |
| 776 | 1,2,3,5,33, 4,6,7,8,34,<br>35,37,39 36,38,40 | 2  | P12020,Q99041                                                                                     |
| 777 | 1,2,3,5,33, 4,6,7,8,34,<br>35,37,40 36,38,39 | 1  | F1M3L7                                                                                            |
| 778 | 1,2,3,5,33, 4,6,7,8,34,<br>35,38,39 36,37,40 | 12 | P06761,P0C0A9,P11598,P12020,P22273,P22282,P30120,P46462,P49134,Q63617,Q99041,Q9QW07               |
| 779 | 1,2,3,5,33, 4,6,7,8,34,<br>35,38,40 36,37,39 | 10 | P06761,P0C0A9,P11598,P22273,P22282,P22283,P46462,P63029,Q63617,Q6P6R2                             |

|     |                                              |                                                                                                                 |
|-----|----------------------------------------------|-----------------------------------------------------------------------------------------------------------------|
| 780 | 1,2,3,5,33, 4,6,7,8,34,<br>35,39,40 36,37,38 | 8 P06761,P0C0A9,P11598,P12020,P22273,P22282,Q63617,Q99041                                                       |
| 781 | 1,2,3,5,33, 4,6,7,8,34,<br>36,37,38 35,39,40 | 3 P22282,Q99041,Q9Z0V6                                                                                          |
| 782 | 1,2,3,5,33, 4,6,7,8,34,<br>36,37,39 35,38,40 | 2 P00714,Q99041                                                                                                 |
| 783 | 1,2,3,5,33, 4,6,7,8,34,<br>36,37,40 35,38,39 | 2 Q9WTT6,Q9Z0V6                                                                                                 |
| 784 | 1,2,3,5,33, 4,6,7,8,34,<br>36,38,39 35,37,40 | 8 P00714,P0C0A9,P22273,P22282,Q63617,Q923V8,Q99041,Q9QW07                                                       |
| 785 | 1,2,3,5,33, 4,6,7,8,34,<br>36,38,40 35,37,39 | 6 P0C0A9,P22273,P22282,Q63617,Q99041,Q9Z0V6                                                                     |
| 786 | 1,2,3,5,33, 4,6,7,8,34,<br>36,39,40 35,37,38 | 5 P01681,P22273,P22282,Q63617,Q99041                                                                            |
| 787 | 1,2,3,5,33, 4,6,7,8,34,<br>37,38,39 35,36,40 | 3 P22282,Q6AY61,Q99041                                                                                          |
| 788 | 1,2,3,5,33, 4,6,7,8,34,<br>37,38,40 35,36,39 | 6 P22282,Q62714,Q6AY61,Q9QX74,Q9Z0V6,Q9Z1F2                                                                     |
| 789 | 1,2,3,5,33, 4,6,7,8,34,<br>37,39,40 35,36,38 | 3 O70417,Q6AY61,Q99041                                                                                          |
| 790 | 1,2,3,5,33, 4,6,7,8,34,<br>38,39,40 35,36,37 | 11 P01039,P06761,P0C0A9,P11598,P19132,P22273,P22282,P55091,Q63617,Q6P6R2,Q99041                                 |
| 791 | 1,2,3,5,34, 4,6,7,8,33,<br>35,36,37 38,39,40 | 7 F1M3L7,P22273,P25031,P47967,P50115,P51740,P55091                                                              |
| 792 | 1,2,3,5,34, 4,6,7,8,33,<br>35,36,38 37,39,40 | 10 P01946,P02091,P0C0A9,P21674,P22273,P22282,Q63617,Q99041,Q9QW07,Q9QWN8                                        |
| 793 | 1,2,3,5,34, 4,6,7,8,33,<br>35,36,39 37,38,40 | 8 P00714,P0C0A9,P22273,P22282,P23739,Q63617,Q99041,Q9QW07                                                       |
| 794 | 1,2,3,5,34, 4,6,7,8,33,<br>35,36,40 37,38,39 | 4 P0C0A9,P22273,P22282,Q63617                                                                                   |
| 795 | 1,2,3,5,34, 4,6,7,8,33,<br>35,37,38 36,39,40 | 3 P01946,P02091,P22273                                                                                          |
| 796 | 1,2,3,5,34, 4,6,7,8,33,<br>35,37,39 36,38,40 | 2 P22273,P50115                                                                                                 |
| 797 | 1,2,3,5,34, 4,6,7,8,33,<br>35,37,40 36,38,39 | 2 P22273,P50115                                                                                                 |
| 798 | 1,2,3,5,34, 4,6,7,8,33,<br>35,38,39 36,37,40 | 15 O08815,P01946,P02091,P06761,P08723,P0C0A9,P11598,P12020,P22273,P22282,P30120,P4646<br>2,Q63617,Q99041,Q9QW07 |
| 799 | 1,2,3,5,34, 4,6,7,8,33,<br>35,38,40 36,37,39 | 11 P01946,P02091,P06761,P08723,P0C0A9,P11598,P22273,P22282,P46462,Q63617,Q6P6R2                                 |

|     |                                              |                                                                                        |
|-----|----------------------------------------------|----------------------------------------------------------------------------------------|
| 800 | 1,2,3,5,34, 4,6,7,8,33,<br>35,39,40 36,37,38 | 7 P06761,P08723,P0C0A9,P11598,P22273,P22282,Q63617                                     |
| 801 | 1,2,3,5,34, 4,6,7,8,33,<br>36,37,38 35,39,40 | 4 P01946,P02091,P22273,Q4KLZ6                                                          |
| 802 | 1,2,3,5,34, 4,6,7,8,33,<br>36,37,39 35,38,40 | 4 O70417,P00714,P22273,Q99041                                                          |
| 803 | 1,2,3,5,34, 4,6,7,8,33,<br>36,37,40 35,38,39 | 2 P22273,Q9JJ50                                                                        |
| 804 | 1,2,3,5,34, 4,6,7,8,33,<br>36,38,39 35,37,40 | 9 P00714,P01946,P02091,P0C0A9,P22273,P22282,Q63617,Q99041,Q9QW07                       |
| 805 | 1,2,3,5,34, 4,6,7,8,33,<br>36,38,40 35,37,39 | 7 P01946,P02091,P0C0A9,P22273,P22282,Q63617,Q99041                                     |
| 806 | 1,2,3,5,34, 4,6,7,8,33,<br>36,39,40 35,37,38 | 5 P0C0A9,P22273,P22282,Q63617,Q99041                                                   |
| 807 | 1,2,3,5,34, 4,6,7,8,33,<br>37,38,39 35,36,40 | 4 P01946,P02091,Q6AY61,Q99041                                                          |
| 808 | 1,2,3,5,34, 4,6,7,8,33,<br>37,38,40 35,36,39 | 6 P01946,P02091,P20767,Q4KLZ6,Q62714,Q6AY61                                            |
| 809 | 1,2,3,5,34, 4,6,7,8,33,<br>37,39,40 35,36,38 | 2 O70417,Q6AY61                                                                        |
| 810 | 1,2,3,5,34, 4,6,7,8,33,<br>38,39,40 35,36,37 | 11 P01946,P02091,P06761,P08723,P0C0A9,P11598,P22273,P22282,Q63617,Q6AY61,Q99041        |
| 811 | 1,2,3,5,35, 4,6,7,8,33,<br>36,37,38 34,39,40 | 4 F1M3L7,P21674,P22273,P22282                                                          |
| 812 | 1,2,3,5,35, 4,6,7,8,33,<br>36,37,39 34,38,40 | 2 F1M3L7,P22273                                                                        |
| 813 | 1,2,3,5,35, 4,6,7,8,33,<br>36,37,40 34,38,39 | 8 F1M3L7,P19132,P22273,P50115,P53792,P82471,Q4G075,Q9Z0V6                              |
| 814 | 1,2,3,5,35, 4,6,7,8,33,<br>36,38,39 34,37,40 | 11 P06761,P0C0A9,P11598,P21674,P22273,P22282,P24368,P30120,Q63617,Q99041,Q9QW07        |
| 815 | 1,2,3,5,35, 4,6,7,8,33,<br>36,38,40 34,37,39 | 12 P06761,P0C0A9,P11598,P19814,P21674,P22273,P22282,P53792,Q63617,Q9QWN8,Q9QX74,Q9Z0V6 |
| 816 | 1,2,3,5,35, 4,6,7,8,33,<br>36,39,40 34,37,38 | 7 P06761,P0C0A9,P11598,P22273,P22282,P23739,Q63617                                     |
| 817 | 1,2,3,5,35, 4,6,7,8,33,<br>37,38,39 34,36,40 | 5 P08494,P08649,P11598,P22282,Q9QX74                                                   |
| 818 | 1,2,3,5,35, 4,6,7,8,33,<br>37,38,40 34,36,39 | 5 P08494,P08649,P22282,P82471,Q9QX74                                                   |
| 819 | 1,2,3,5,35, 4,6,7,8,33,<br>37,39,40 34,36,38 | 7 O70417,P07150,P08649,P11598,P50115,P82471,Q9QX74                                     |

|     |                                                  |    |                                                                                                                     |
|-----|--------------------------------------------------|----|---------------------------------------------------------------------------------------------------------------------|
| 820 | 1,2,3,5,35, 4,6,7,8,33,<br>38,39,40 34,36,37     | 16 | O55004,P06761,P08649,P08723,P0C0A9,P11598,P22273,P22282,P22283,P46462,P55091,P9808<br>9,Q62635,Q63617,Q6P6R2,Q9QX74 |
| 821 | 1,2,3,5,36, 4,6,7,8,33,<br>37,38,39 34,35,40     | 2  | Q99041,Q9QX74                                                                                                       |
| 822 | 1,2,3,5,36, 4,6,7,8,33,<br>37,38,40 34,35,39     | 4  | P22282,P82471,Q9QX74,Q9Z0V6                                                                                         |
| 823 | 1,2,3,5,36, 4,6,7,8,33,<br>37,39,40 34,35,38     | 3  | O70417,P82471,Q9QX74                                                                                                |
| 824 | 1,2,3,5,36, 4,6,7,8,33,<br>38,39,40 34,35,37     | 8  | P06761,P0C0A9,P11598,P22273,P22282,Q63617,Q99041,Q9QX74                                                             |
| 825 | 1,2,3,5,37, 4,6,7,8,33,<br>38,39,40 34,35,36     | 6  | P08494,P08649,P22282,P82471,Q6AY61,Q9QX74                                                                           |
| 826 | 1,2,3,6,7,8 4,5,35,36,<br>,33,34 37,38,39,4<br>0 | 11 | iRT-<br>Kit_WR_fusion,O54800;Q5DWV2,O89117,P02631,P20766,P80202,P97615,Q09030,Q91XN4,Q99<br>MH3,Q99PP0              |
| 827 | 1,2,3,6,7,8 4,5,34,36,<br>,33,35 37,38,39,4<br>0 | 7  | O54800;Q5DWV2,O89117,P80202,P85971,Q09030,Q5PPH0,Q91XN4                                                             |
| 828 | 1,2,3,6,7,8 4,5,34,35,<br>,33,36 37,38,39,4<br>0 | 9  | O54800;Q5DWV2,P08649,P80202,P97615,Q09030,Q91XN4,Q99MH3,Q99PP0,Q9QZQ5                                               |
| 829 | 1,2,3,6,7,8 4,5,34,35,<br>,33,37 36,38,39,4<br>0 | 4  | O54800;Q5DWV2,P80202,Q09030,Q91XN4                                                                                  |
| 830 | 1,2,3,6,7,8 4,5,34,35,<br>,33,38 36,37,39,4<br>0 | 8  | iRT-Kit_WR_fusion,O54800;Q5DWV2,P35280,P50115,P80202,Q09030,Q6IG05,Q91XN4                                           |
| 831 | 1,2,3,6,7,8 4,5,34,35,<br>,33,39 36,37,38,4<br>0 | 8  | O54800;Q5DWV2,P20766,P80202,Q09030,Q5RKI1,Q6AYQ8,Q91XN4,Q99MH3                                                      |
| 832 | 1,2,3,6,7,8 4,5,34,35,<br>,33,40 36,37,38,3<br>9 | 5  | O54800;Q5DWV2,P02631,P80202,Q09030,Q91XN4                                                                           |
| 833 | 1,2,3,6,7,8 4,5,33,36,<br>,34,35 37,38,39,4<br>0 | 9  | O54800;Q5DWV2,P20766,P36374,P36860,P80202,P97580,Q30KJ2,Q91XN4,Q9Z1F2                                               |
| 834 | 1,2,3,6,7,8 4,5,33,35,<br>,34,36 37,38,39,4<br>0 | 8  | iRT-Kit_WR_fusion,P08649,P20766,P80202,P97615,Q09030,Q91XN4,Q9Z1F2                                                  |

|     |                       |                               |                                                                                                                  |
|-----|-----------------------|-------------------------------|------------------------------------------------------------------------------------------------------------------|
| 835 | 1,2,3,6,7,8<br>,34,37 | 4,5,33,35,<br>36,38,39,4<br>0 | 3 P01835,Q66H69,Q91XN4                                                                                           |
| 836 | 1,2,3,6,7,8<br>,34,38 | 4,5,33,35,<br>36,37,39,4<br>0 | iRT-<br>12 Kit_WR_fusion,O54800;Q5DWW2,P01946,P02091,P20766,P35280,P36374,P97580,Q30KJ2,Q628<br>12,Q6IG05,Q91XN4 |
| 837 | 1,2,3,6,7,8<br>,34,39 | 4,5,33,35,<br>36,37,38,4<br>0 | 9 P02651,P20766,P36374,P80202,P97580,Q30KJ2,Q62894,Q9Z0V6,Q9Z1F2                                                 |
| 838 | 1,2,3,6,7,8<br>,34,40 | 4,5,33,35,<br>36,37,38,3<br>9 | 7 P15399,P20766,P36374,P80202,P97580,Q30KJ2,Q91XN4                                                               |
| 839 | 1,2,3,6,7,8<br>,35,36 | 4,5,33,34,<br>37,38,39,4<br>0 | 6 P19218,P85971,Q09030,Q91XN4,Q9JJS8,Q9Z1F2                                                                      |
| 840 | 1,2,3,6,7,8<br>,35,37 | 4,5,33,34,<br>36,38,39,4<br>0 | 3 P19132,P19218,P36860                                                                                           |
| 841 | 1,2,3,6,7,8<br>,35,38 | 4,5,33,34,<br>36,37,39,4<br>0 | 4 P19218,P35280,P36374,Q62812                                                                                    |
| 842 | 1,2,3,6,7,8<br>,35,39 | 4,5,33,34,<br>36,37,38,4<br>0 | 6 P20766,P36374,P36376,P36860,P85971,Q9Z1F2                                                                      |
| 843 | 1,2,3,6,7,8<br>,35,40 | 4,5,33,34,<br>36,37,38,3<br>9 | 3 P36374,P80202,P85971                                                                                           |
| 844 | 1,2,3,6,7,8<br>,36,37 | 4,5,33,34,<br>35,38,39,4<br>0 | 5 P01835,P09656,P19132,Q91XN4,Q9JI85                                                                             |
| 845 | 1,2,3,6,7,8<br>,36,38 | 4,5,33,34,<br>35,37,39,4<br>0 | 3 P19218,P35280,Q91XN4                                                                                           |
| 846 | 1,2,3,6,7,8<br>,36,39 | 4,5,33,34,<br>35,37,38,4<br>0 | 4 B0BNN3,P20766,P97615,Q9Z1F2                                                                                    |
| 847 | 1,2,3,6,7,8<br>,36,40 | 4,5,33,34,<br>35,37,38,3<br>9 | 3 P80202,P97615,Q91XN4                                                                                           |

|     |                        |                               |    |                                                                                     |
|-----|------------------------|-------------------------------|----|-------------------------------------------------------------------------------------|
| 848 | 1,2,3,6,7,8<br>,37,38  | 4,5,33,34,<br>35,36,39,4<br>0 | 4  | P01835,P19218,P35280,Q6IG05                                                         |
| 849 | 1,2,3,6,7,8<br>,37,39  | 4,5,33,34,<br>35,36,38,4<br>0 | 1  | P01835                                                                              |
| 850 | 1,2,3,6,7,8<br>,37,40  | 4,5,33,34,<br>35,36,38,3<br>9 | 4  | P01835,P82471,Q5GRG2,Q9QW07                                                         |
| 851 | 1,2,3,6,7,8<br>,38,39  | 4,5,33,34,<br>35,36,37,4<br>0 | 5  | P02770,P20766,P35280,P36374,P36376                                                  |
| 852 | 1,2,3,6,7,8<br>,38,40  | 4,5,33,34,<br>35,36,37,3<br>9 | 5  | P35280,P36374,P57113,Q62812,Q91XN4                                                  |
| 853 | 1,2,3,6,7,8<br>,39,40  | 4,5,33,34,<br>35,36,37,3<br>8 | 4  | P20766,P36374,P36376,P80202                                                         |
| 854 | 1,2,3,6,7,3<br>3,34,35 | 4,5,8,36,3<br>7,38,39,40      | 6  | D3ZUC6,O54800;Q5DWW2,O89117,P08721,Q5I0D7,Q99MH3                                    |
| 855 | 1,2,3,6,7,3<br>3,34,36 | 4,5,8,35,3<br>7,38,39,40      | 11 | O54800;Q5DWW2,O89117,P08649,P08721,P80299,P97615,P98089,Q09030,Q5I0D7,Q91XN4,Q99MH3 |
| 856 | 1,2,3,6,7,3<br>3,34,37 | 4,5,8,35,3<br>6,38,39,40      | 5  | O54800;Q5DWW2,P98089,Q6AY61,Q6AYQ8,Q99MH3                                           |
| 857 | 1,2,3,6,7,3<br>3,34,38 | 4,5,8,35,3<br>6,37,39,40      | 5  | O54800;Q5DWW2,P01946,P02091,P80299,Q6AY61                                           |
| 858 | 1,2,3,6,7,3<br>3,34,39 | 4,5,8,35,3<br>6,37,38,40      | 7  | O54800;Q5DWW2,P02651,P20766,Q5RKI1,Q62894,Q6AYQ8,Q99MH3                             |
| 859 | 1,2,3,6,7,3<br>3,34,40 | 4,5,8,35,3<br>6,37,38,39      | 5  | O54800;Q5DWW2,P20766,Q6AY61,Q91XN4,Q99MH3                                           |
| 860 | 1,2,3,6,7,3<br>3,35,36 | 4,5,8,34,3<br>7,38,39,40      | 6  | O54800;Q5DWW2,P08721,P09656,P49134,Q09030,Q99MH3                                    |
| 861 | 1,2,3,6,7,3<br>3,35,37 | 4,5,8,34,3<br>6,38,39,40      | 1  | O54800;Q5DWW2                                                                       |
| 862 | 1,2,3,6,7,3<br>3,35,38 | 4,5,8,34,3<br>6,37,39,40      | 2  | O54800;Q5DWW2,Q62812                                                                |
| 863 | 1,2,3,6,7,3<br>3,35,39 | 4,5,8,34,3<br>6,37,38,40      | 3  | O54800;Q5DWW2,Q5RKI1,Q99MH3                                                         |
| 864 | 1,2,3,6,7,3<br>3,35,40 | 4,5,8,34,3<br>6,37,38,39      | 2  | O54800;Q5DWW2,P06760                                                                |



|     |                        |                          |   |                                                         |
|-----|------------------------|--------------------------|---|---------------------------------------------------------|
| 865 | 1,2,3,6,7,3<br>3,36,37 | 4,5,8,34,3<br>5,38,39,40 | 4 | O54800;Q5DWV2,P09656,P98089,Q09030                      |
| 866 | 1,2,3,6,7,3<br>3,36,38 | 4,5,8,34,3<br>5,37,39,40 | 3 | O54800;Q5DWV2,P09656,Q09030                             |
| 867 | 1,2,3,6,7,3<br>3,36,39 | 4,5,8,34,3<br>5,37,38,40 | 4 | O54800;Q5DWV2,Q09030,Q5RKI1,Q99MH3                      |
| 868 | 1,2,3,6,7,3<br>3,36,40 | 4,5,8,34,3<br>5,37,38,39 | 3 | O54800;Q5DWV2,Q09030,Q91XN4                             |
| 869 | 1,2,3,6,7,3<br>3,37,38 | 4,5,8,34,3<br>5,36,39,40 | 4 | O54800;Q5DWV2,P01835,P23739,Q6AY61                      |
| 870 | 1,2,3,6,7,3<br>3,37,39 | 4,5,8,34,3<br>5,36,38,40 | 4 | O54800;Q5DWV2,Q5RKI1,Q6AY61,Q6AYQ8                      |
| 871 | 1,2,3,6,7,3<br>3,37,40 | 4,5,8,34,3<br>5,36,38,39 | 4 | O54800;Q5DWV2,P01835,Q62714,Q6AY61                      |
| 872 | 1,2,3,6,7,3<br>3,38,39 | 4,5,8,34,3<br>5,36,37,40 | 3 | O54800;Q5DWV2,P02770,Q5RKI1                             |
| 873 | 1,2,3,6,7,3<br>3,38,40 | 4,5,8,34,3<br>5,36,37,39 | 6 | O54800;Q5DWV2,P01039,P06760,P23739,Q62714,Q62812        |
| 874 | 1,2,3,6,7,3<br>3,39,40 | 4,5,8,34,3<br>5,36,37,38 | 4 | O54800;Q5DWV2,P06760,Q5RKI1,Q6AYQ8                      |
| 875 | 1,2,3,6,7,3<br>4,35,36 | 4,5,8,33,3<br>7,38,39,40 | 3 | P20766,Q5I0D7,Q9QWN8                                    |
| 876 | 1,2,3,6,7,3<br>4,35,37 | 4,5,8,33,3<br>6,38,39,40 | 3 | P01835,P19132,P20760                                    |
| 877 | 1,2,3,6,7,3<br>4,35,38 | 4,5,8,33,3<br>6,37,39,40 | 7 | O54800;Q5DWV2,P01946,P02091,P20766,P36374,Q62812,Q9QWN8 |
| 878 | 1,2,3,6,7,3<br>4,35,39 | 4,5,8,33,3<br>6,37,38,40 | 2 | P20766,Q9Z1F2                                           |
| 879 | 1,2,3,6,7,3<br>4,35,40 | 4,5,8,33,3<br>6,37,38,39 | 1 | P20766                                                  |
| 880 | 1,2,3,6,7,3<br>4,36,37 | 4,5,8,33,3<br>5,38,39,40 | 5 | P01835,P09656,P47967,P55091,P98089                      |
| 881 | 1,2,3,6,7,3<br>4,36,38 | 4,5,8,33,3<br>5,37,39,40 | 7 | O54800;Q5DWV2,P01835,P01946,P02091,P20766,Q62812,Q9QWN8 |
| 882 | 1,2,3,6,7,3<br>4,36,39 | 4,5,8,33,3<br>5,37,38,40 | 4 | P20766,P97615,Q99MH3,Q9Z1F2                             |
| 883 | 1,2,3,6,7,3<br>4,36,40 | 4,5,8,33,3<br>5,37,38,39 | 2 | P01835,P20766                                           |
| 884 | 1,2,3,6,7,3<br>4,37,38 | 4,5,8,33,3<br>5,36,39,40 | 7 | O54800;Q5DWV2,P01835,P01946,P02091,P20767,P23739,Q6AY61 |

|     |                        |                          |   |                                                                       |
|-----|------------------------|--------------------------|---|-----------------------------------------------------------------------|
| 885 | 1,2,3,6,7,3<br>4,37,39 | 4,5,8,33,3<br>5,36,38,40 | 3 | P01835,P20766,Q6AY61                                                  |
| 886 | 1,2,3,6,7,3<br>4,37,40 | 4,5,8,33,3<br>5,36,38,39 | 3 | P01835,P20767,Q6AY61                                                  |
| 887 | 1,2,3,6,7,3<br>4,38,39 | 4,5,8,33,3<br>5,36,37,40 | 9 | O54800;Q5DWV2,P01835,P01946,P02091,P02770,P20766,P60905,Q6AY61,Q9QX79 |
| 888 | 1,2,3,6,7,3<br>4,38,40 | 4,5,8,33,3<br>5,36,37,39 | 9 | O54800;Q5DWV2,P01835,P01946,P02091,P20766,P23739,P97580,Q62812,Q6AY61 |
| 889 | 1,2,3,6,7,3<br>4,39,40 | 4,5,8,33,3<br>5,36,37,38 | 3 | P01835,P20766,Q6AY61                                                  |
| 890 | 1,2,3,6,7,3<br>5,36,37 | 4,5,8,33,3<br>4,38,39,40 | 3 | P09656,P19132,Q9JJS8                                                  |
| 891 | 1,2,3,6,7,3<br>5,36,38 | 4,5,8,33,3<br>4,37,39,40 | 4 | P09656,P19218,Q62812,Q9QWN8                                           |
| 892 | 1,2,3,6,7,3<br>5,36,39 | 4,5,8,33,3<br>4,37,38,40 | 0 |                                                                       |
| 893 | 1,2,3,6,7,3<br>5,36,40 | 4,5,8,33,3<br>4,37,38,39 | 4 | P02793;Q7TP54,P06760,P19132,Q9QWN8                                    |
| 894 | 1,2,3,6,7,3<br>5,37,38 | 4,5,8,33,3<br>4,36,39,40 | 3 | P01835,P19218,Q62812                                                  |
| 895 | 1,2,3,6,7,3<br>5,37,39 | 4,5,8,33,3<br>4,36,38,40 | 1 | P01835                                                                |
| 896 | 1,2,3,6,7,3<br>5,37,40 | 4,5,8,33,3<br>4,36,38,39 | 3 | P01835,P19132,P20760                                                  |
| 897 | 1,2,3,6,7,3<br>5,38,39 | 4,5,8,33,3<br>4,36,37,40 | 3 | P06760,P13432,P36374                                                  |
| 898 | 1,2,3,6,7,3<br>5,38,40 | 4,5,8,33,3<br>4,36,37,39 | 5 | P06760,P36374,Q62812,Q6P6R2,Q9QX74                                    |
| 899 | 1,2,3,6,7,3<br>5,39,40 | 4,5,8,33,3<br>4,36,37,38 | 1 | P06760                                                                |
| 900 | 1,2,3,6,7,3<br>6,37,38 | 4,5,8,33,3<br>4,35,39,40 | 2 | P01835,P09656                                                         |
| 901 | 1,2,3,6,7,3<br>6,37,39 | 4,5,8,33,3<br>4,35,38,40 | 2 | P01835,P09656                                                         |
| 902 | 1,2,3,6,7,3<br>6,37,40 | 4,5,8,33,3<br>4,35,38,39 | 3 | P01835,P09656,P19132                                                  |
| 903 | 1,2,3,6,7,3<br>6,38,39 | 4,5,8,33,3<br>4,35,37,40 | 1 | P01835                                                                |
| 904 | 1,2,3,6,7,3<br>6,38,40 | 4,5,8,33,3<br>4,35,37,39 | 4 | P01835,P06760,Q62812,Q9QWN8                                           |

|     |                        |                          |   |                                                                       |
|-----|------------------------|--------------------------|---|-----------------------------------------------------------------------|
| 905 | 1,2,3,6,7,3<br>6,39,40 | 4,5,8,33,3<br>4,35,37,38 | 3 | B0BNN3,P01835,P06760                                                  |
| 906 | 1,2,3,6,7,3<br>7,38,39 | 4,5,8,33,3<br>4,35,36,40 | 3 | P01835,P02770,Q6AY61                                                  |
| 907 | 1,2,3,6,7,3<br>7,38,40 | 4,5,8,33,3<br>4,35,36,39 | 7 | P01835,P20767,P23739,Q62714,Q62812,Q6AY61,Q9QX74                      |
| 908 | 1,2,3,6,7,3<br>7,39,40 | 4,5,8,33,3<br>4,35,36,38 | 4 | P00762,P01835,Q6AY61,Q9QX74                                           |
| 909 | 1,2,3,6,7,3<br>8,39,40 | 4,5,8,33,3<br>4,35,36,37 | 6 | P01835,P02770,P06760,P51740,P55091,Q9QX74                             |
| 910 | 1,2,3,6,8,3<br>3,34,35 | 4,5,7,36,3<br>7,38,39,40 | 8 | D3ZUC6,O54800;Q5DWV2,O89117,P80202,P97580,Q09030,Q30KJ2,Q99MH3        |
| 911 | 1,2,3,6,8,3<br>3,34,36 | 4,5,7,35,3<br>7,38,39,40 | 9 | O54800;Q5DWV2,O89117,P02625,P08649,P80202,P97615,Q09030,Q91XN4,Q99MH3 |
| 912 | 1,2,3,6,8,3<br>3,34,37 | 4,5,7,35,3<br>6,38,39,40 | 3 | O54800;Q5DWV2,O89117,Q99MH3                                           |
| 913 | 1,2,3,6,8,3<br>3,34,38 | 4,5,7,35,3<br>6,37,39,40 | 9 | O54800;Q5DWV2,O89117,P01946,P02091,P02625,P97580,Q30KJ2,Q6IG05,Q99MH3 |
| 914 | 1,2,3,6,8,3<br>3,34,39 | 4,5,7,35,3<br>6,37,38,40 | 8 | O54800;Q5DWV2,P02651,P08649,P80202,P97580,Q30KJ2,Q63532,Q99MH3        |
| 915 | 1,2,3,6,8,3<br>3,34,40 | 4,5,7,35,3<br>6,37,38,39 | 9 | O54800;Q5DWV2,O89117,P15399,P80202,P97580,Q09030,Q30KJ2,Q91XN4,Q99MH3 |
| 916 | 1,2,3,6,8,3<br>3,35,36 | 4,5,7,34,3<br>7,38,39,40 | 7 | O54800;Q5DWV2,O89117,P08649,P09656,P49134,Q09030,Q99MH3               |
| 917 | 1,2,3,6,8,3<br>3,35,37 | 4,5,7,34,3<br>6,38,39,40 | 3 | O54800;Q5DWV2,O89117,Q09030                                           |
| 918 | 1,2,3,6,8,3<br>3,35,38 | 4,5,7,34,3<br>6,37,39,40 | 5 | O54800;Q5DWV2,O89117,Q09030,Q68G31,Q6IG05                             |
| 919 | 1,2,3,6,8,3<br>3,35,39 | 4,5,7,34,3<br>6,37,38,40 | 4 | O54800;Q5DWV2,P36376,Q09030,Q99MH3                                    |
| 920 | 1,2,3,6,8,3<br>3,35,40 | 4,5,7,34,3<br>6,37,38,39 | 3 | O54800;Q5DWV2,P80202,Q09030                                           |
| 921 | 1,2,3,6,8,3<br>3,36,37 | 4,5,7,34,3<br>5,38,39,40 | 5 | O54800;Q5DWV2,P08649,P09656,Q09030,Q99MH3                             |
| 922 | 1,2,3,6,8,3<br>3,36,38 | 4,5,7,34,3<br>5,37,39,40 | 6 | O54800;Q5DWV2,P08649,P09656,Q09030,Q6IG05,Q99MH3                      |
| 923 | 1,2,3,6,8,3<br>3,36,39 | 4,5,7,34,3<br>5,37,38,40 | 6 | O54800;Q5DWV2,P00714,P08649,P80202,Q09030,Q99MH3                      |
| 924 | 1,2,3,6,8,3<br>3,36,40 | 4,5,7,34,3<br>5,37,38,39 | 7 | O54800;Q5DWV2,P01681,P08649,P80202,Q09030,Q91XN4,Q99MH3               |

|     |                        |                          |   |                                                  |
|-----|------------------------|--------------------------|---|--------------------------------------------------|
| 925 | 1,2,3,6,8,3<br>3,37,38 | 4,5,7,34,3<br>5,36,39,40 | 3 | O54800;Q5DWV2,Q68G31,Q6IG05                      |
| 926 | 1,2,3,6,8,3<br>3,37,39 | 4,5,7,34,3<br>5,36,38,40 | 2 | O54800;Q5DWV2,Q99MH3                             |
| 927 | 1,2,3,6,8,3<br>3,37,40 | 4,5,7,34,3<br>5,36,38,39 | 3 | O54800;Q5DWV2,P82471,Q9QW07                      |
| 928 | 1,2,3,6,8,3<br>3,38,39 | 4,5,7,34,3<br>5,36,37,40 | 3 | O54800;Q5DWV2,P36376,Q99MH3                      |
| 929 | 1,2,3,6,8,3<br>3,38,40 | 4,5,7,34,3<br>5,36,37,39 | 5 | O54800;Q5DWV2,P01039,P25031,P80202,Q6IG05        |
| 930 | 1,2,3,6,8,3<br>3,39,40 | 4,5,7,34,3<br>5,36,37,38 | 4 | O54800;Q5DWV2,P36376,P80202,Q99MH3               |
| 931 | 1,2,3,6,8,3<br>4,35,36 | 4,5,7,33,3<br>7,38,39,40 | 3 | P08649,Q30KJ2,Q99MH3                             |
| 932 | 1,2,3,6,8,3<br>4,35,37 | 4,5,7,33,3<br>6,38,39,40 | 2 | P36860,Q30KJ2                                    |
| 933 | 1,2,3,6,8,3<br>4,35,38 | 4,5,7,33,3<br>6,37,39,40 | 5 | P01946,P02091,P97580,Q30KJ2,Q6IG05               |
| 934 | 1,2,3,6,8,3<br>4,35,39 | 4,5,7,33,3<br>6,37,38,40 | 4 | P36376,P36860,P97580,Q30KJ2                      |
| 935 | 1,2,3,6,8,3<br>4,35,40 | 4,5,7,33,3<br>6,37,38,39 | 3 | P15399,P97580,Q30KJ2                             |
| 936 | 1,2,3,6,8,3<br>4,36,37 | 4,5,7,33,3<br>5,38,39,40 | 4 | P08649,P09656,P55091,Q9JI85                      |
| 937 | 1,2,3,6,8,3<br>4,36,38 | 4,5,7,33,3<br>5,37,39,40 | 7 | P01946,P02091,P02625,P08649,P97580,Q30KJ2,Q6IG05 |
| 938 | 1,2,3,6,8,3<br>4,36,39 | 4,5,7,33,3<br>5,37,38,40 | 5 | P08649,P97580,P97615,Q99MH3,Q9Z1F2               |
| 939 | 1,2,3,6,8,3<br>4,36,40 | 4,5,7,33,3<br>5,37,38,39 | 6 | P08649,P15399,P97580,P97615,Q30KJ2,Q91XN4        |
| 940 | 1,2,3,6,8,3<br>4,37,38 | 4,5,7,33,3<br>5,36,39,40 | 5 | P01946,P02091,P97580,Q30KJ2,Q6IG05               |
| 941 | 1,2,3,6,8,3<br>4,37,39 | 4,5,7,33,3<br>5,36,38,40 | 1 | P97580                                           |
| 942 | 1,2,3,6,8,3<br>4,37,40 | 4,5,7,33,3<br>5,36,38,39 | 3 | P15399,P97580,Q30KJ2                             |
| 943 | 1,2,3,6,8,3<br>4,38,39 | 4,5,7,33,3<br>5,36,37,40 | 6 | P01946,P02091,P15399,P36376,P97580,Q30KJ2        |
| 944 | 1,2,3,6,8,3<br>4,38,40 | 4,5,7,33,3<br>5,36,37,39 | 6 | P01946,P02091,P15399,P97580,Q30KJ2,Q6IG05        |

|     |                        |                          |                                      |
|-----|------------------------|--------------------------|--------------------------------------|
| 945 | 1,2,3,6,8,3<br>4,39,40 | 4,5,7,33,3<br>5,36,37,38 | 5 P15399,P36376,P97580,P97840,Q30KJ2 |
| 946 | 1,2,3,6,8,3<br>5,36,37 | 4,5,7,33,3<br>4,38,39,40 | 2 P09656,P19132                      |
| 947 | 1,2,3,6,8,3<br>5,36,38 | 4,5,7,33,3<br>4,37,39,40 | 2 P09656,P19218                      |
| 948 | 1,2,3,6,8,3<br>5,36,39 | 4,5,7,33,3<br>4,37,38,40 | 1 P36376                             |
| 949 | 1,2,3,6,8,3<br>5,36,40 | 4,5,7,33,3<br>4,37,38,39 | 2 P02793;Q7TP54,P82471               |
| 950 | 1,2,3,6,8,3<br>5,37,38 | 4,5,7,33,3<br>4,36,39,40 | 2 P19218,Q6IG05                      |
| 951 | 1,2,3,6,8,3<br>5,37,39 | 4,5,7,33,3<br>4,36,38,40 | 2 P36376,P82471                      |
| 952 | 1,2,3,6,8,3<br>5,37,40 | 4,5,7,33,3<br>4,36,38,39 | 2 P19132,P82471                      |
| 953 | 1,2,3,6,8,3<br>5,38,39 | 4,5,7,33,3<br>4,36,37,40 | 1 P36376                             |
| 954 | 1,2,3,6,8,3<br>5,38,40 | 4,5,7,33,3<br>4,36,37,39 | 4 P06760,P36374,P82471,Q62635        |
| 955 | 1,2,3,6,8,3<br>5,39,40 | 4,5,7,33,3<br>4,36,37,38 | 4 P06760,P36376,P54921,P82471        |
| 956 | 1,2,3,6,8,3<br>6,37,38 | 4,5,7,33,3<br>4,35,39,40 | 2 P09656,Q6IG05                      |
| 957 | 1,2,3,6,8,3<br>6,37,39 | 4,5,7,33,3<br>4,35,38,40 | 1 P09656                             |
| 958 | 1,2,3,6,8,3<br>6,37,40 | 4,5,7,33,3<br>4,35,38,39 | 4 P09656,P19629,P82471,Q5GRG2        |
| 959 | 1,2,3,6,8,3<br>6,38,39 | 4,5,7,33,3<br>4,35,37,40 | 1 P36376                             |
| 960 | 1,2,3,6,8,3<br>6,38,40 | 4,5,7,33,3<br>4,35,37,39 | 0                                    |
| 961 | 1,2,3,6,8,3<br>6,39,40 | 4,5,7,33,3<br>4,35,37,38 | 5 B0BNN3,P36376,P54921,P82471,Q9R168 |
| 962 | 1,2,3,6,8,3<br>7,38,39 | 4,5,7,33,3<br>4,35,36,40 | 0                                    |
| 963 | 1,2,3,6,8,3<br>7,38,40 | 4,5,7,33,3<br>4,35,36,39 | 2 P82471,Q5GRG2                      |
| 964 | 1,2,3,6,8,3<br>7,39,40 | 4,5,7,33,3<br>4,35,36,38 | 2 P36376,P82471                      |

|     |                         |                          |    |                                                                                                   |
|-----|-------------------------|--------------------------|----|---------------------------------------------------------------------------------------------------|
| 965 | 1,2,3,6,8,3<br>8,39,40  | 4,5,7,33,3<br>4,35,36,37 | 7  | P06760,P36376,P51740,P54921,P55091,P97840,Q62635                                                  |
| 966 | 1,2,3,6,33,<br>34,35,36 | 4,5,7,8,37,<br>38,39,40  | 13 | D3ZUC6,O54800;Q5DWV2,O89117,P08649,P08721,P22273,P39069,P49134,Q498R7,Q5I0D7,Q5QE79,Q6PCU2,Q99MH3 |
| 967 | 1,2,3,6,33,<br>34,35,37 | 4,5,7,8,36,<br>38,39,40  | 5  | D3ZUC6,O54800;Q5DWV2,O89117,P39069,Q99MH3                                                         |
| 968 | 1,2,3,6,33,<br>34,35,38 | 4,5,7,8,36,<br>37,39,40  | 7  | D3ZUC6,O54800;Q5DWV2,O89117,P01946,P02091,P63029,P80299                                           |
| 969 | 1,2,3,6,33,<br>34,35,39 | 4,5,7,8,36,<br>37,38,40  | 3  | D3ZUC6,O54800;Q5DWV2,Q99MH3                                                                       |
| 970 | 1,2,3,6,33,<br>34,35,40 | 4,5,7,8,36,<br>37,38,39  | 6  | D3ZUC6,O54800;Q5DWV2,O89117,P06760,Q06000,Q99MH3                                                  |
| 971 | 1,2,3,6,33,<br>34,36,37 | 4,5,7,8,35,<br>38,39,40  | 8  | O54800;Q5DWV2,O89117,P08649,P09656,P98089,Q05695,Q62635,Q99MH3                                    |
| 972 | 1,2,3,6,33,<br>34,36,38 | 4,5,7,8,35,<br>37,39,40  | 8  | D3ZUC6,O54800;Q5DWV2,O89117,P01946,P02091,P80299,Q99041,Q99MH3                                    |
| 973 | 1,2,3,6,33,<br>34,36,39 | 4,5,7,8,35,<br>37,38,40  | 5  | D3ZUC6,O54800;Q5DWV2,P08649,Q99041,Q99MH3                                                         |
| 974 | 1,2,3,6,33,<br>34,36,40 | 4,5,7,8,35,<br>37,38,39  | 2  | O54800;Q5DWV2,Q99MH3                                                                              |
| 975 | 1,2,3,6,33,<br>34,37,38 | 4,5,7,8,35,<br>36,39,40  | 4  | O54800;Q5DWV2,P01946,P02091,Q6AY61                                                                |
| 976 | 1,2,3,6,33,<br>34,37,39 | 4,5,7,8,35,<br>36,38,40  | 3  | O54800;Q5DWV2,Q99376,Q99MH3                                                                       |
| 977 | 1,2,3,6,33,<br>34,37,40 | 4,5,7,8,35,<br>36,38,39  | 2  | O54800;Q5DWV2,Q62714                                                                              |
| 978 | 1,2,3,6,33,<br>34,38,39 | 4,5,7,8,35,<br>36,37,40  | 6  | O54800;Q5DWV2,P01946,P02091,P19132,Q99041,Q99MH3                                                  |
| 979 | 1,2,3,6,33,<br>34,38,40 | 4,5,7,8,35,<br>36,37,39  | 6  | O54800;Q5DWV2,P01039,P01946,P02091,P63029,P97580                                                  |
| 980 | 1,2,3,6,33,<br>34,39,40 | 4,5,7,8,35,<br>36,37,38  | 4  | O54800;Q5DWV2,P06760,P19218,Q99MH3                                                                |
| 981 | 1,2,3,6,33,<br>35,36,37 | 4,5,7,8,34,<br>38,39,40  | 6  | D4A5U3,P09656,P49134,Q4G075,Q99MH3,Q9Z0V6                                                         |
| 982 | 1,2,3,6,33,<br>35,36,38 | 4,5,7,8,34,<br>37,39,40  | 6  | O54800;Q5DWV2,P06760,P09656,P49134,P63029,Q9Z0V6                                                  |
| 983 | 1,2,3,6,33,<br>35,36,39 | 4,5,7,8,34,<br>37,38,40  | 3  | P06760,P49134,Q99MH3                                                                              |
| 984 | 1,2,3,6,33,<br>35,36,40 | 4,5,7,8,34,<br>37,38,39  | 6  | P06760,P49134,Q99MH3,Q9EQS0,Q9WTT6,Q9Z0V6                                                         |

|      |                                              |                                                                         |
|------|----------------------------------------------|-------------------------------------------------------------------------|
| 985  | 1,2,3,6,33, 4,5,7,8,34,<br>35,37,38 36,39,40 | 3 O54800;Q5DWV2,Q68G31,Q9Z0V6                                           |
| 986  | 1,2,3,6,33, 4,5,7,8,34,<br>35,37,39 36,38,40 | 2 P06760,Q68G31                                                         |
| 987  | 1,2,3,6,33, 4,5,7,8,34,<br>35,37,40 36,38,39 | 4 P06760,Q4G075,Q68G31,Q9Z0V6                                           |
| 988  | 1,2,3,6,33, 4,5,7,8,34,<br>35,38,39 36,37,40 | 4 O54800;Q5DWV2,P06760,P49134,Q68G31                                    |
| 989  | 1,2,3,6,33, 4,5,7,8,34,<br>35,38,40 36,37,39 | 8 O54800;Q5DWV2,P01039,P06760,P22282,P63029,Q68G31,Q6P6R2,Q9Z0V6        |
| 990  | 1,2,3,6,33, 4,5,7,8,34,<br>35,39,40 36,37,38 | 1 P06760                                                                |
| 991  | 1,2,3,6,33, 4,5,7,8,34,<br>36,37,38 35,39,40 | 4 O54800;Q5DWV2,P09656,Q68G31,Q9Z0V6                                    |
| 992  | 1,2,3,6,33, 4,5,7,8,34,<br>36,37,39 35,38,40 | 2 P09656,Q99MH3                                                         |
| 993  | 1,2,3,6,33, 4,5,7,8,34,<br>36,37,40 35,38,39 | 5 P06760,P09656,Q4G075,Q9WTT6,Q9Z0V6                                    |
| 994  | 1,2,3,6,33, 4,5,7,8,34,<br>36,38,39 35,37,40 | 4 O54800;Q5DWV2,P06760,Q99041,Q99MH3                                    |
| 995  | 1,2,3,6,33, 4,5,7,8,34,<br>36,38,40 35,37,39 | 6 O54800;Q5DWV2,P01039,P06760,P63029,Q9WTT6,Q9Z0V6                      |
| 996  | 1,2,3,6,33, 4,5,7,8,34,<br>36,39,40 35,37,38 | 2 P06760,Q99MH3                                                         |
| 997  | 1,2,3,6,33, 4,5,7,8,34,<br>37,38,39 35,36,40 | 2 O54800;Q5DWV2,Q68G31                                                  |
| 998  | 1,2,3,6,33, 4,5,7,8,34,<br>37,38,40 35,36,39 | 9 O54800;Q5DWV2,P01039,P06760,P23739,Q62714,Q68G31,Q9QX74,Q9Z0V6,Q9Z1F2 |
| 999  | 1,2,3,6,33, 4,5,7,8,34,<br>37,39,40 35,36,38 | 1 P06760                                                                |
| 1000 | 1,2,3,6,33, 4,5,7,8,34,<br>38,39,40 35,36,37 | 8 O54800;Q5DWV2,P01039,P06760,P22282,P51740,P55091,P97840,Q9QX74        |
| 1001 | 1,2,3,6,34, 4,5,7,8,33,<br>35,36,37 38,39,40 | 4 P09656,P19132,P39069,Q4G075                                           |
| 1002 | 1,2,3,6,34, 4,5,7,8,33,<br>35,36,38 37,39,40 | 4 P01946,P02091,P22273,Q9QWN8                                           |
| 1003 | 1,2,3,6,34, 4,5,7,8,33,<br>35,36,39 37,38,40 | 2 P22273,Q99MH3                                                         |
| 1004 | 1,2,3,6,34, 4,5,7,8,33,<br>35,36,40 37,38,39 | 3 P06760,P22273,Q9EQS0                                                  |

|      |                                              |                                                                  |
|------|----------------------------------------------|------------------------------------------------------------------|
| 1005 | 1,2,3,6,34, 4,5,7,8,33,<br>35,37,38 36,39,40 | 2 P01946,P02091                                                  |
| 1006 | 1,2,3,6,34, 4,5,7,8,33,<br>35,37,39 36,38,40 | 0                                                                |
| 1007 | 1,2,3,6,34, 4,5,7,8,33,<br>35,37,40 36,38,39 | 1 Q4G075                                                         |
| 1008 | 1,2,3,6,34, 4,5,7,8,33,<br>35,38,39 36,37,40 | 2 P01946,P02091                                                  |
| 1009 | 1,2,3,6,34, 4,5,7,8,33,<br>35,38,40 36,37,39 | 5 P01946,P02091,P06760,P15399,P97580                             |
| 1010 | 1,2,3,6,34, 4,5,7,8,33,<br>35,39,40 36,37,38 | 2 P06760,P97580                                                  |
| 1011 | 1,2,3,6,34, 4,5,7,8,33,<br>36,37,38 35,39,40 | 5 P01835,P01946,P02091,P09656,Q4KLZ6                             |
| 1012 | 1,2,3,6,34, 4,5,7,8,33,<br>36,37,39 35,38,40 | 1 P09656                                                         |
| 1013 | 1,2,3,6,34, 4,5,7,8,33,<br>36,37,40 35,38,39 | 3 P01835,P09656,Q4G075                                           |
| 1014 | 1,2,3,6,34, 4,5,7,8,33,<br>36,38,39 35,37,40 | 2 P01946,P02091                                                  |
| 1015 | 1,2,3,6,34, 4,5,7,8,33,<br>36,38,40 35,37,39 | 3 P01946,P02091,P06760                                           |
| 1016 | 1,2,3,6,34, 4,5,7,8,33,<br>36,39,40 35,37,38 | 1 P06760                                                         |
| 1017 | 1,2,3,6,34, 4,5,7,8,33,<br>37,38,39 35,36,40 | 4 P01835,P01946,P02091,Q6AY61                                    |
| 1018 | 1,2,3,6,34, 4,5,7,8,33,<br>37,38,40 35,36,39 | 8 P01835,P01946,P02091,P20767,P23739,Q4KLZ6,Q62714,Q6AY61        |
| 1019 | 1,2,3,6,34, 4,5,7,8,33,<br>37,39,40 35,36,38 | 1 P01835                                                         |
| 1020 | 1,2,3,6,34, 4,5,7,8,33,<br>38,39,40 35,36,37 | 8 P01946,P02091,P06760,P15399,P51740,P55091,P97580,P97840        |
| 1021 | 1,2,3,6,35, 4,5,7,8,33,<br>36,37,38 34,39,40 | 4 P06760,P09656,Q9QX74,Q9Z0V6                                    |
| 1022 | 1,2,3,6,35, 4,5,7,8,33,<br>36,37,39 34,38,40 | 3 P06760,P09656,P50116                                           |
| 1023 | 1,2,3,6,35, 4,5,7,8,33,<br>36,37,40 34,38,39 | 8 P02793;Q7TP54,P06760,P09656,P19132,P82471,Q4G075,Q9QX74,Q9Z0V6 |
| 1024 | 1,2,3,6,35, 4,5,7,8,33,<br>36,38,39 34,37,40 | 1 P06760                                                         |



|      |                                              |                                                                      |
|------|----------------------------------------------|----------------------------------------------------------------------|
| 1025 | 1,2,3,6,35, 4,5,7,8,33,<br>36,38,40 34,37,39 | 5 P02793;Q7TP54,P06760,P22282,Q9QX74,Q9Z0V6                          |
| 1026 | 1,2,3,6,35, 4,5,7,8,33,<br>36,39,40 34,37,38 | 2 P06760,Q9QX74                                                      |
| 1027 | 1,2,3,6,35, 4,5,7,8,33,<br>37,38,39 34,36,40 | 2 P06760,Q9QX74                                                      |
| 1028 | 1,2,3,6,35, 4,5,7,8,33,<br>37,38,40 34,36,39 | 5 P06760,P20646,P82471,Q9QX74,Q9Z0V6                                 |
| 1029 | 1,2,3,6,35, 4,5,7,8,33,<br>37,39,40 34,36,38 | 3 P06760,P82471,Q9QX74                                               |
| 1030 | 1,2,3,6,35, 4,5,7,8,33,<br>38,39,40 34,36,37 | 9 P06760,P0C0A9,P22282,P51740,P55091,P98089,Q62635,Q6P6R2,Q9QX74     |
| 1031 | 1,2,3,6,36, 4,5,7,8,33,<br>37,38,39 34,35,40 | 4 P01835,P06760,P09656,Q9QX74                                        |
| 1032 | 1,2,3,6,36, 4,5,7,8,33,<br>37,38,40 34,35,39 | 8 P01835,P06760,P09656,P19629,P82471,Q5GRG2,Q9QX74,Q9Z0V6            |
| 1033 | 1,2,3,6,36, 4,5,7,8,33,<br>37,39,40 34,35,38 | 6 P01835,P06760,P09656,P19629,P82471,Q9QX74                          |
| 1034 | 1,2,3,6,36, 4,5,7,8,33,<br>38,39,40 34,35,37 | 3 P06760,P51740,Q9QX74                                               |
| 1035 | 1,2,3,6,37, 4,5,7,8,33,<br>38,39,40 34,35,36 | 5 P01835,P06760,P51740,P82471,Q9QX74                                 |
| 1036 | 1,2,3,7,8,3 4,5,6,36,3<br>3,34,35 7,38,39,40 | 5 iRT-Kit_WR_fusion,O89117,P20766,P36860,P51740                      |
| 1037 | 1,2,3,7,8,3 4,5,6,35,3<br>3,34,36 7,38,39,40 | 7 iRT-Kit_WR_fusion,P08721,P20766,P51740,P97615,Q99MH3,Q9QX74        |
| 1038 | 1,2,3,7,8,3 4,5,6,35,3<br>3,34,37 6,38,39,40 | 2 P51740,Q6AYQ8                                                      |
| 1039 | 1,2,3,7,8,3 4,5,6,35,3<br>3,34,38 6,37,39,40 | 8 B1H234,iRT-Kit_WR_fusion,P02091,P02625,P20766,P35280,Q64093,Q6IG05 |
| 1040 | 1,2,3,7,8,3 4,5,6,35,3<br>3,34,39 6,37,38,40 | 7 P02651,P20766,Q5RKI1,Q64093,Q6AYQ8,Q99MH3,Q9Z0V6                   |
| 1041 | 1,2,3,7,8,3 4,5,6,35,3<br>3,34,40 6,37,38,39 | 3 iRT-Kit_WR_fusion,P20766,P97580                                    |
| 1042 | 1,2,3,7,8,3 4,5,6,34,3<br>3,35,36 7,38,39,40 | 2 P01681,P51740                                                      |
| 1043 | 1,2,3,7,8,3 4,5,6,34,3<br>3,35,37 6,38,39,40 | 2 P36860,P51740                                                      |
| 1044 | 1,2,3,7,8,3 4,5,6,34,3<br>3,35,38 6,37,39,40 | 1 P35280                                                             |

|      |                        |                          |   |                                                                           |
|------|------------------------|--------------------------|---|---------------------------------------------------------------------------|
| 1045 | 1,2,3,7,8,3<br>3,35,39 | 4,5,6,34,3<br>6,37,38,40 | 2 | Q4KLZ6,Q5RKI1                                                             |
| 1046 | 1,2,3,7,8,3<br>3,35,40 | 4,5,6,34,3<br>6,37,38,39 | 0 |                                                                           |
| 1047 | 1,2,3,7,8,3<br>3,36,37 | 4,5,6,34,3<br>5,38,39,40 | 3 | P08723,P47967,P51740                                                      |
| 1048 | 1,2,3,7,8,3<br>3,36,38 | 4,5,6,34,3<br>5,37,39,40 | 2 | iRT-Kit_WR_fusion,P35280                                                  |
| 1049 | 1,2,3,7,8,3<br>3,36,39 | 4,5,6,34,3<br>5,37,38,40 | 4 | P00714,Q5RKI1,Q64093,Q99MH3                                               |
| 1050 | 1,2,3,7,8,3<br>3,36,40 | 4,5,6,34,3<br>5,37,38,39 | 1 | P01681                                                                    |
| 1051 | 1,2,3,7,8,3<br>3,37,38 | 4,5,6,34,3<br>5,36,39,40 | 2 | P35280,Q6IG05                                                             |
| 1052 | 1,2,3,7,8,3<br>3,37,39 | 4,5,6,34,3<br>5,36,38,40 | 2 | Q5RKI1,Q6AYQ8                                                             |
| 1053 | 1,2,3,7,8,3<br>3,37,40 | 4,5,6,34,3<br>5,36,38,39 | 1 | Q6AYQ8                                                                    |
| 1054 | 1,2,3,7,8,3<br>3,38,39 | 4,5,6,34,3<br>5,36,37,40 | 8 | P02770,P07174,P11883,P35280,Q5RKI1,Q63556,Q64093,Q6AYQ8                   |
| 1055 | 1,2,3,7,8,3<br>3,38,40 | 4,5,6,34,3<br>5,36,37,39 | 1 | P35280                                                                    |
| 1056 | 1,2,3,7,8,3<br>3,39,40 | 4,5,6,34,3<br>5,36,37,38 | 2 | Q5RKI1,Q6AYQ8                                                             |
| 1057 | 1,2,3,7,8,3<br>4,35,36 | 4,5,6,33,3<br>7,38,39,40 | 6 | iRT-Kit_WR_fusion,P20766,P36860,P51740,Q66H69,Q9Z1F2                      |
| 1058 | 1,2,3,7,8,3<br>4,35,37 | 4,5,6,33,3<br>6,38,39,40 | 4 | P36860,P51740,Q66H69,Q923V8                                               |
| 1059 | 1,2,3,7,8,3<br>4,35,38 | 4,5,6,33,3<br>6,37,39,40 | 9 | iRT-Kit_WR_fusion,P02091,P20766,P25809,P35280,P36860,P97580,Q30KJ2,Q6IG05 |
| 1060 | 1,2,3,7,8,3<br>4,35,39 | 4,5,6,33,3<br>6,37,38,40 | 4 | P20766,P36860,Q9Z0V6,Q9Z1F2                                               |
| 1061 | 1,2,3,7,8,3<br>4,35,40 | 4,5,6,33,3<br>6,37,38,39 | 5 | P20766,P36860,P97580,Q30KJ2,Q66H69                                        |
| 1062 | 1,2,3,7,8,3<br>4,36,37 | 4,5,6,33,3<br>5,38,39,40 | 5 | P47967,P51740,P55091,Q66H69,Q811M5                                        |
| 1063 | 1,2,3,7,8,3<br>4,36,38 | 4,5,6,33,3<br>5,37,39,40 | 7 | iRT-Kit_WR_fusion,P02091,P02625,P20766,P35280,Q64093,Q6IG05               |
| 1064 | 1,2,3,7,8,3<br>4,36,39 | 4,5,6,33,3<br>5,37,38,40 | 5 | P00714,P20766,P97615,Q64093,Q9Z1F2                                        |

|      |                        |                          |    |                                                                       |
|------|------------------------|--------------------------|----|-----------------------------------------------------------------------|
| 1065 | 1,2,3,7,8,3<br>4,36,40 | 4,5,6,33,3<br>5,37,38,39 | 4  | P20766,P97580,P97615,Q66H69                                           |
| 1066 | 1,2,3,7,8,3<br>4,37,38 | 4,5,6,33,3<br>5,36,39,40 | 5  | P02091,P35280,P62804,Q6IG05,Q9EQS0                                    |
| 1067 | 1,2,3,7,8,3<br>4,37,39 | 4,5,6,33,3<br>5,36,38,40 | 6  | P20766,Q64093,Q66H69,Q6AYQ8,Q923V8,Q9Z0V6                             |
| 1068 | 1,2,3,7,8,3<br>4,37,40 | 4,5,6,33,3<br>5,36,38,39 | 5  | P62804,P97580,Q66H69,Q811M5,Q923V8                                    |
| 1069 | 1,2,3,7,8,3<br>4,38,39 | 4,5,6,33,3<br>5,36,37,40 | 10 | P02091,P02770,P11883,P20766,P35280,P50503,P97580,Q64093,Q9EQS0,Q9Z0V6 |
| 1070 | 1,2,3,7,8,3<br>4,38,40 | 4,5,6,33,3<br>5,36,37,39 | 8  | iRT-Kit_WR_fusion,P02091,P15399,P20766,P35280,P97580,Q30KJ2,Q6IG05    |
| 1071 | 1,2,3,7,8,3<br>4,39,40 | 4,5,6,33,3<br>5,36,37,38 | 4  | P20766,P97580,Q30KJ2,Q64093                                           |
| 1072 | 1,2,3,7,8,3<br>5,36,37 | 4,5,6,33,3<br>4,38,39,40 | 4  | P19132,P47967,P51740,Q66H69                                           |
| 1073 | 1,2,3,7,8,3<br>5,36,38 | 4,5,6,33,3<br>4,37,39,40 | 2  | P19218,P35280                                                         |
| 1074 | 1,2,3,7,8,3<br>5,36,39 | 4,5,6,33,3<br>4,37,38,40 | 1  | Q9Z1F2                                                                |
| 1075 | 1,2,3,7,8,3<br>5,36,40 | 4,5,6,33,3<br>4,37,38,39 | 1  | P02793;Q7TP54                                                         |
| 1076 | 1,2,3,7,8,3<br>5,37,38 | 4,5,6,33,3<br>4,36,39,40 | 2  | P35280,P36860                                                         |
| 1077 | 1,2,3,7,8,3<br>5,37,39 | 4,5,6,33,3<br>4,36,38,40 | 1  | P36860                                                                |
| 1078 | 1,2,3,7,8,3<br>5,37,40 | 4,5,6,33,3<br>4,36,38,39 | 2  | P36860,Q66H69                                                         |
| 1079 | 1,2,3,7,8,3<br>5,38,39 | 4,5,6,33,3<br>4,36,37,40 | 3  | P02770,P11883,P35280                                                  |
| 1080 | 1,2,3,7,8,3<br>5,38,40 | 4,5,6,33,3<br>4,36,37,39 | 3  | P35280,Q62635,Q62812                                                  |
| 1081 | 1,2,3,7,8,3<br>5,39,40 | 4,5,6,33,3<br>4,36,37,38 | 2  | P00774,P36860                                                         |
| 1082 | 1,2,3,7,8,3<br>6,37,38 | 4,5,6,33,3<br>4,35,39,40 | 1  | P35280                                                                |
| 1083 | 1,2,3,7,8,3<br>6,37,39 | 4,5,6,33,3<br>4,35,38,40 | 0  |                                                                       |
| 1084 | 1,2,3,7,8,3<br>6,37,40 | 4,5,6,33,3<br>4,35,38,39 | 2  | Q66H69,Q811M5                                                         |

|      |                         |                          |    |                                                                                     |
|------|-------------------------|--------------------------|----|-------------------------------------------------------------------------------------|
| 1085 | 1,2,3,7,8,3<br>6,38,39  | 4,5,6,33,3<br>4,35,37,40 | 3  | P02770,P35280,Q64093                                                                |
| 1086 | 1,2,3,7,8,3<br>6,38,40  | 4,5,6,33,3<br>4,35,37,39 | 1  | P35280                                                                              |
| 1087 | 1,2,3,7,8,3<br>6,39,40  | 4,5,6,33,3<br>4,35,37,38 | 0  |                                                                                     |
| 1088 | 1,2,3,7,8,3<br>7,38,39  | 4,5,6,33,3<br>4,35,36,40 | 6  | P02770,P08494,P11883,P35280,Q64093,Q9EQS0                                           |
| 1089 | 1,2,3,7,8,3<br>7,38,40  | 4,5,6,33,3<br>4,35,36,39 | 3  | P08494,P22006,P35280                                                                |
| 1090 | 1,2,3,7,8,3<br>7,39,40  | 4,5,6,33,3<br>4,35,36,38 | 1  | Q6AYQ8                                                                              |
| 1091 | 1,2,3,7,8,3<br>8,39,40  | 4,5,6,33,3<br>4,35,36,37 | 7  | D4A5U3,P02770,P11883,P35280,P55091,Q62635,Q64093                                    |
| 1092 | 1,2,3,7,33,<br>34,35,36 | 4,5,6,8,37,<br>38,39,40  | 6  | D3ZUC6,P08721,P25031,P51740,Q5I0D7,Q6PCU2                                           |
| 1093 | 1,2,3,7,33,<br>34,35,37 | 4,5,6,8,36,<br>38,39,40  | 3  | P25031,P51740,P54921                                                                |
| 1094 | 1,2,3,7,33,<br>34,35,38 | 4,5,6,8,36,<br>37,39,40  | 2  | P80299,Q9R168                                                                       |
| 1095 | 1,2,3,7,33,<br>34,35,39 | 4,5,6,8,36,<br>37,38,40  | 2  | P20766,Q5RKI1                                                                       |
| 1096 | 1,2,3,7,33,<br>34,35,40 | 4,5,6,8,36,<br>37,38,39  | 0  |                                                                                     |
| 1097 | 1,2,3,7,33,<br>34,36,37 | 4,5,6,8,35,<br>38,39,40  | 7  | P08721,P25031,P47967,P51740,P54921,P98089,Q62635                                    |
| 1098 | 1,2,3,7,33,<br>34,36,38 | 4,5,6,8,35,<br>37,39,40  | 5  | P02091,P08721,P80299,Q64093,Q99041                                                  |
| 1099 | 1,2,3,7,33,<br>34,36,39 | 4,5,6,8,35,<br>37,38,40  | 5  | P20766,Q5RKI1,Q64093,Q99041,Q99MH3                                                  |
| 1100 | 1,2,3,7,33,<br>34,36,40 | 4,5,6,8,35,<br>37,38,39  | 0  |                                                                                     |
| 1101 | 1,2,3,7,33,<br>34,37,38 | 4,5,6,8,35,<br>36,39,40  | 4  | P02091,P54921,Q64093,Q6AY61                                                         |
| 1102 | 1,2,3,7,33,<br>34,37,39 | 4,5,6,8,35,<br>36,38,40  | 4  | Q5RKI1,Q64093,Q6AY61,Q6AYQ8                                                         |
| 1103 | 1,2,3,7,33,<br>34,37,40 | 4,5,6,8,35,<br>36,38,39  | 3  | Q62714,Q6AY61,Q6AYQ8                                                                |
| 1104 | 1,2,3,7,33,<br>34,38,39 | 4,5,6,8,35,<br>36,37,40  | 12 | P02091,P02770,P19132,P20766,P46720,P80299,Q5RKI1,Q63556,Q64093,Q6AY61,Q6AYQ8,Q99041 |

|      |                                              |                                             |
|------|----------------------------------------------|---------------------------------------------|
| 1105 | 1,2,3,7,33, 4,5,6,8,35,<br>34,38,40 36,37,39 | 3 P80299,Q64093,Q6AY61                      |
| 1106 | 1,2,3,7,33, 4,5,6,8,35,<br>34,39,40 36,37,38 | 6 P19218,P20766,Q5RKI1,Q64093,Q6AY61,Q6AYQ8 |
| 1107 | 1,2,3,7,33, 4,5,6,8,34,<br>35,36,37 38,39,40 | 3 P25031,P47967,P51740                      |
| 1108 | 1,2,3,7,33, 4,5,6,8,34,<br>35,36,38 37,39,40 | 1 P49134                                    |
| 1109 | 1,2,3,7,33, 4,5,6,8,34,<br>35,36,39 37,38,40 | 2 P49134,Q5RKI1                             |
| 1110 | 1,2,3,7,33, 4,5,6,8,34,<br>35,36,40 37,38,39 | 1 P49134                                    |
| 1111 | 1,2,3,7,33, 4,5,6,8,34,<br>35,37,38 36,39,40 | 0                                           |
| 1112 | 1,2,3,7,33, 4,5,6,8,34,<br>35,37,39 36,38,40 | 1 Q5RKI1                                    |
| 1113 | 1,2,3,7,33, 4,5,6,8,34,<br>35,37,40 36,38,39 | 0                                           |
| 1114 | 1,2,3,7,33, 4,5,6,8,34,<br>35,38,39 36,37,40 | 4 P02770,P13432,P49134,Q5RKI1               |
| 1115 | 1,2,3,7,33, 4,5,6,8,34,<br>35,38,40 36,37,39 | 1 Q62812                                    |
| 1116 | 1,2,3,7,33, 4,5,6,8,34,<br>35,39,40 36,37,38 | 1 Q5RKI1                                    |
| 1117 | 1,2,3,7,33, 4,5,6,8,34,<br>36,37,38 35,39,40 | 0                                           |
| 1118 | 1,2,3,7,33, 4,5,6,8,34,<br>36,37,39 35,38,40 | 2 Q5RKI1,Q6AYQ8                             |
| 1119 | 1,2,3,7,33, 4,5,6,8,34,<br>36,37,40 35,38,39 | 0                                           |
| 1120 | 1,2,3,7,33, 4,5,6,8,34,<br>36,38,39 35,37,40 | 4 P02770,Q5RKI1,Q64093,Q99041               |
| 1121 | 1,2,3,7,33, 4,5,6,8,34,<br>36,38,40 35,37,39 | 0                                           |
| 1122 | 1,2,3,7,33, 4,5,6,8,34,<br>36,39,40 35,37,38 | 2 Q5RKI1,Q64093                             |
| 1123 | 1,2,3,7,33, 4,5,6,8,34,<br>37,38,39 35,36,40 | 6 P02770,P17475,Q5RKI1,Q64093,Q6AY61,Q6AYQ8 |
| 1124 | 1,2,3,7,33, 4,5,6,8,34,<br>37,38,40 35,36,39 | 3 Q62714,Q6AY61,Q9Z1F2                      |

|      |                                              |                                      |
|------|----------------------------------------------|--------------------------------------|
| 1125 | 1,2,3,7,33, 4,5,6,8,34,<br>37,39,40 35,36,38 | 3 Q5RKI1,Q6AY61,Q6AYQ8               |
| 1126 | 1,2,3,7,33, 4,5,6,8,34,<br>38,39,40 35,36,37 | 4 P02770,P55091,Q5RKI1,Q64093        |
| 1127 | 1,2,3,7,34, 4,5,6,8,33,<br>35,36,37 38,39,40 | 3 P25031,P47967,P51740               |
| 1128 | 1,2,3,7,34, 4,5,6,8,33,<br>35,36,38 37,39,40 | 3 P02091,P25031,Q9QWN8               |
| 1129 | 1,2,3,7,34, 4,5,6,8,33,<br>35,36,39 37,38,40 | 3 P20766,P25031,Q9Z1F2               |
| 1130 | 1,2,3,7,34, 4,5,6,8,33,<br>35,36,40 37,38,39 | 0                                    |
| 1131 | 1,2,3,7,34, 4,5,6,8,33,<br>35,37,38 36,39,40 | 1 P25031                             |
| 1132 | 1,2,3,7,34, 4,5,6,8,33,<br>35,37,39 36,38,40 | 1 P25031                             |
| 1133 | 1,2,3,7,34, 4,5,6,8,33,<br>35,37,40 36,38,39 | 1 P20767                             |
| 1134 | 1,2,3,7,34, 4,5,6,8,33,<br>35,38,39 36,37,40 | 2 P02770,P20766                      |
| 1135 | 1,2,3,7,34, 4,5,6,8,33,<br>35,38,40 36,37,39 | 1 Q62812                             |
| 1136 | 1,2,3,7,34, 4,5,6,8,33,<br>35,39,40 36,37,38 | 1 P20766                             |
| 1137 | 1,2,3,7,34, 4,5,6,8,33,<br>36,37,38 35,39,40 | 3 P01835,P02091,P25031               |
| 1138 | 1,2,3,7,34, 4,5,6,8,33,<br>36,37,39 35,38,40 | 2 P25031,Q64093                      |
| 1139 | 1,2,3,7,34, 4,5,6,8,33,<br>36,37,40 35,38,39 | 2 P01835,Q811M5                      |
| 1140 | 1,2,3,7,34, 4,5,6,8,33,<br>36,38,39 35,37,40 | 4 P01946,P02091,P20766,Q64093        |
| 1141 | 1,2,3,7,34, 4,5,6,8,33,<br>36,38,40 35,37,39 | 2 P02091,Q64093                      |
| 1142 | 1,2,3,7,34, 4,5,6,8,33,<br>36,39,40 35,37,38 | 2 P20766,Q64093                      |
| 1143 | 1,2,3,7,34, 4,5,6,8,33,<br>37,38,39 35,36,40 | 5 P01835,P02091,P02770,Q64093,Q6AY61 |
| 1144 | 1,2,3,7,34, 4,5,6,8,33,<br>37,38,40 35,36,39 | 4 P01835,P20767,P23739,Q6AY61        |

|      |                                              |                                                           |
|------|----------------------------------------------|-----------------------------------------------------------|
| 1145 | 1,2,3,7,34, 4,5,6,8,33,<br>37,39,40 35,36,38 | 3 P01835,Q6AY61,Q6AYQ8                                    |
| 1146 | 1,2,3,7,34, 4,5,6,8,33,<br>38,39,40 35,36,37 | 5 P02770,P20766,P50503,Q64093,Q6AY61                      |
| 1147 | 1,2,3,7,35, 4,5,6,8,33,<br>36,37,38 34,39,40 | 1 P25031                                                  |
| 1148 | 1,2,3,7,35, 4,5,6,8,33,<br>36,37,39 34,38,40 | 1 P25031                                                  |
| 1149 | 1,2,3,7,35, 4,5,6,8,33,<br>36,37,40 34,38,39 | 2 P02793;Q7TP54,P19132                                    |
| 1150 | 1,2,3,7,35, 4,5,6,8,33,<br>36,38,39 34,37,40 | 1 P13432                                                  |
| 1151 | 1,2,3,7,35, 4,5,6,8,33,<br>36,38,40 34,37,39 | 3 P02793;Q7TP54,Q62812,Q9QWN8                             |
| 1152 | 1,2,3,7,35, 4,5,6,8,33,<br>36,39,40 34,37,38 | 0                                                         |
| 1153 | 1,2,3,7,35, 4,5,6,8,33,<br>37,38,39 34,36,40 | 3 P02770,P08494,P08649                                    |
| 1154 | 1,2,3,7,35, 4,5,6,8,33,<br>37,38,40 34,36,39 | 4 P08494,P08649,P20767,Q9QX74                             |
| 1155 | 1,2,3,7,35, 4,5,6,8,33,<br>37,39,40 34,36,38 | 1 P08649                                                  |
| 1156 | 1,2,3,7,35, 4,5,6,8,33,<br>38,39,40 34,36,37 | 8 P00774,P02770,P06760,P08649,P11883,P55091,P98089,Q62635 |
| 1157 | 1,2,3,7,36, 4,5,6,8,33,<br>37,38,39 34,35,40 | 2 P01835,Q64093                                           |
| 1158 | 1,2,3,7,36, 4,5,6,8,33,<br>37,38,40 34,35,39 | 1 P01835                                                  |
| 1159 | 1,2,3,7,36, 4,5,6,8,33,<br>37,39,40 34,35,38 | 1 P01835                                                  |
| 1160 | 1,2,3,7,36, 4,5,6,8,33,<br>38,39,40 34,35,37 | 2 P02770,Q64093                                           |
| 1161 | 1,2,3,7,37, 4,5,6,8,33,<br>38,39,40 34,35,36 | 7 P01835,P02770,P08494,P08649,Q64093,Q6AY61,Q9QX74        |
| 1162 | 1,2,3,8,33, 4,5,6,7,37,<br>34,35,36 38,39,40 | 5 D3ZUC6,O89117,P51740,Q5QE79,Q99MH3                      |
| 1163 | 1,2,3,8,33, 4,5,6,7,36,<br>34,35,37 38,39,40 | 4 O89117,P36860,P50116,P51740                             |
| 1164 | 1,2,3,8,33, 4,5,6,7,36,<br>34,35,38 37,39,40 | 6 O89117,P02091,P25809,P97580,Q30KJ2,Q6IG05               |

|      |                                              |                                                                         |
|------|----------------------------------------------|-------------------------------------------------------------------------|
| 1165 | 1,2,3,8,33, 4,5,6,7,36,<br>34,35,39 37,38,40 | 2 Q99041,Q99MH3                                                         |
| 1166 | 1,2,3,8,33, 4,5,6,7,36,<br>34,35,40 37,38,39 | 4 O89117,P15399,P97580,Q30KJ2                                           |
| 1167 | 1,2,3,8,33, 4,5,6,7,35,<br>34,36,37 38,39,40 | 5 O89117,P51740,P98089,Q5QE79,Q99MH3                                    |
| 1168 | 1,2,3,8,33, 4,5,6,7,35,<br>34,36,38 37,39,40 | 5 P02091,P02625,Q6IG05,Q99041,Q99MH3                                    |
| 1169 | 1,2,3,8,33, 4,5,6,7,35,<br>34,36,39 37,38,40 | 3 P00714,Q99041,Q99MH3                                                  |
| 1170 | 1,2,3,8,33, 4,5,6,7,35,<br>34,36,40 37,38,39 | 4 P01681,P97580,Q99MH3,Q9Z0J6                                           |
| 1171 | 1,2,3,8,33, 4,5,6,7,35,<br>34,37,38 36,39,40 | 2 P02091,Q6IG05                                                         |
| 1172 | 1,2,3,8,33, 4,5,6,7,35,<br>34,37,39 36,38,40 | 4 Q6AYQ8,Q99376,Q99MH3,Q9QWN8                                           |
| 1173 | 1,2,3,8,33, 4,5,6,7,35,<br>34,37,40 36,38,39 | 1 P97580                                                                |
| 1174 | 1,2,3,8,33, 4,5,6,7,35,<br>34,38,39 36,37,40 | 9 P02091,P02793,Q7TP54,P19132,P97580,Q30KJ2,Q64093,Q6IFU7,Q99041,Q99MH3 |
| 1175 | 1,2,3,8,33, 4,5,6,7,35,<br>34,38,40 36,37,39 | 6 P02091,P15399,P63029,P97580,Q30KJ2,Q6IG05                             |
| 1176 | 1,2,3,8,33, 4,5,6,7,35,<br>34,39,40 36,37,38 | 6 P15399,P19218,P97580,Q30KJ2,Q99041,Q99MH3                             |
| 1177 | 1,2,3,8,33, 4,5,6,7,34,<br>35,36,37 38,39,40 | 2 P50116,P51740                                                         |
| 1178 | 1,2,3,8,33, 4,5,6,7,34,<br>35,36,38 37,39,40 | 1 P49134                                                                |
| 1179 | 1,2,3,8,33, 4,5,6,7,34,<br>35,36,39 37,38,40 | 5 P01681,P49134,P50116,Q99041,Q99MH3                                    |
| 1180 | 1,2,3,8,33, 4,5,6,7,34,<br>35,36,40 37,38,39 | 1 P01681                                                                |
| 1181 | 1,2,3,8,33, 4,5,6,7,34,<br>35,37,38 36,39,40 | 2 Q68G31,Q6IG05                                                         |
| 1182 | 1,2,3,8,33, 4,5,6,7,34,<br>35,37,39 36,38,40 | 1 P50116                                                                |
| 1183 | 1,2,3,8,33, 4,5,6,7,34,<br>35,37,40 36,38,39 | 1 P50116                                                                |
| 1184 | 1,2,3,8,33, 4,5,6,7,34,<br>35,38,39 36,37,40 | 4 P11598,P11883,P49134,Q68G31                                           |



|      |                                              |                                      |
|------|----------------------------------------------|--------------------------------------|
| 1185 | 1,2,3,8,33, 4,5,6,7,34,<br>35,38,40 36,37,39 | 3 P11598,P63029,Q68G31               |
| 1186 | 1,2,3,8,33, 4,5,6,7,34,<br>35,39,40 36,37,38 | 1 P11598                             |
| 1187 | 1,2,3,8,33, 4,5,6,7,34,<br>36,37,38 35,39,40 | 1 Q6IG05                             |
| 1188 | 1,2,3,8,33, 4,5,6,7,34,<br>36,37,39 35,38,40 | 3 P00714,P50116,Q99MH3               |
| 1189 | 1,2,3,8,33, 4,5,6,7,34,<br>36,37,40 35,38,39 | 1 P01681                             |
| 1190 | 1,2,3,8,33, 4,5,6,7,34,<br>36,38,39 35,37,40 | 3 P00714,Q64093,Q99041               |
| 1191 | 1,2,3,8,33, 4,5,6,7,34,<br>36,38,40 35,37,39 | 2 P01681,P63029                      |
| 1192 | 1,2,3,8,33, 4,5,6,7,34,<br>36,39,40 35,37,38 | 3 P01681,Q99041,Q99MH3               |
| 1193 | 1,2,3,8,33, 4,5,6,7,34,<br>37,38,39 35,36,40 | 1 Q68G31                             |
| 1194 | 1,2,3,8,33, 4,5,6,7,34,<br>37,38,40 35,36,39 | 3 Q68G31,Q6IG05,Q9Z1F2               |
| 1195 | 1,2,3,8,33, 4,5,6,7,34,<br>37,39,40 35,36,38 | 2 Q6AYQ8,Q9QWN8                      |
| 1196 | 1,2,3,8,33, 4,5,6,7,34,<br>38,39,40 35,36,37 | 5 P11883,P19132,P55091,P97840,Q62635 |
| 1197 | 1,2,3,8,34, 4,5,6,7,33,<br>35,36,37 38,39,40 | 2 P50116,P51740                      |
| 1198 | 1,2,3,8,34, 4,5,6,7,33,<br>35,36,38 37,39,40 | 2 P02091,P97580                      |
| 1199 | 1,2,3,8,34, 4,5,6,7,33,<br>35,36,39 37,38,40 | 2 P50116,Q9Z1F2                      |
| 1200 | 1,2,3,8,34, 4,5,6,7,33,<br>35,36,40 37,38,39 | 3 P15399,P50116,P97580               |
| 1201 | 1,2,3,8,34, 4,5,6,7,33,<br>35,37,38 36,39,40 | 5 P02091,P25809,P36860,P97580,Q6IG05 |
| 1202 | 1,2,3,8,34, 4,5,6,7,33,<br>35,37,39 36,38,40 | 4 P25809,P36860,P50116,Q923V8        |
| 1203 | 1,2,3,8,34, 4,5,6,7,33,<br>35,37,40 36,38,39 | 5 P15399,P36860,P50116,P97580,Q923V8 |
| 1204 | 1,2,3,8,34, 4,5,6,7,33,<br>35,38,39 36,37,40 | 5 P02091,P11883,P25809,P97580,Q30KJ2 |

|      |                                              |                                                                          |
|------|----------------------------------------------|--------------------------------------------------------------------------|
| 1205 | 1,2,3,8,34, 4,5,6,7,33,<br>35,38,40 36,37,39 | 3 P15399,P97580,Q30KJ2                                                   |
| 1206 | 1,2,3,8,34, 4,5,6,7,33,<br>35,39,40 36,37,38 | 6 P00774,P15399,P36860,P50116,P97580,Q30KJ2                              |
| 1207 | 1,2,3,8,34, 4,5,6,7,33,<br>36,37,38 35,39,40 | 2 P02091,Q6IG05                                                          |
| 1208 | 1,2,3,8,34, 4,5,6,7,33,<br>36,37,39 35,38,40 | 1 P50116                                                                 |
| 1209 | 1,2,3,8,34, 4,5,6,7,33,<br>36,37,40 35,38,39 | 3 P50116,P97580,Q811M5                                                   |
| 1210 | 1,2,3,8,34, 4,5,6,7,33,<br>36,38,39 35,37,40 | 5 P01946,P02091,P97580,Q64093,Q99041                                     |
| 1211 | 1,2,3,8,34, 4,5,6,7,33,<br>36,38,40 35,37,39 | 4 P02091,P15399,P97580,Q30KJ2                                            |
| 1212 | 1,2,3,8,34, 4,5,6,7,33,<br>36,39,40 35,37,38 | 2 P15399,P97580                                                          |
| 1213 | 1,2,3,8,34, 4,5,6,7,33,<br>37,38,39 35,36,40 | 2 P02091,P97580                                                          |
| 1214 | 1,2,3,8,34, 4,5,6,7,33,<br>37,38,40 35,36,39 | 5 P02091,P15399,P97580,Q30KJ2,Q6IG05                                     |
| 1215 | 1,2,3,8,34, 4,5,6,7,33,<br>37,39,40 35,36,38 | 4 P15399,P50116,P97580,Q923V8                                            |
| 1216 | 1,2,3,8,34, 4,5,6,7,33,<br>38,39,40 35,36,37 | 10 D4A5U3,P02091,P11883,P15399,P50503,P97580,P97840,Q30KJ2,Q64093,Q8CIZ5 |
| 1217 | 1,2,3,8,35, 4,5,6,7,33,<br>36,37,38 34,39,40 | 0                                                                        |
| 1218 | 1,2,3,8,35, 4,5,6,7,33,<br>36,37,39 34,38,40 | 1 P50116                                                                 |
| 1219 | 1,2,3,8,35, 4,5,6,7,33,<br>36,37,40 34,38,39 | 2 P02793;Q7TP54,P50116                                                   |
| 1220 | 1,2,3,8,35, 4,5,6,7,33,<br>36,38,39 34,37,40 | 0                                                                        |
| 1221 | 1,2,3,8,35, 4,5,6,7,33,<br>36,38,40 34,37,39 | 0                                                                        |
| 1222 | 1,2,3,8,35, 4,5,6,7,33,<br>36,39,40 34,37,38 | 1 P50116                                                                 |
| 1223 | 1,2,3,8,35, 4,5,6,7,33,<br>37,38,39 34,36,40 | 2 P08494,P11883                                                          |
| 1224 | 1,2,3,8,35, 4,5,6,7,33,<br>37,38,40 34,36,39 | 1 P08494                                                                 |

|      |                                              |                                                                          |
|------|----------------------------------------------|--------------------------------------------------------------------------|
| 1225 | 1,2,3,8,35, 4,5,6,7,33,<br>37,39,40 34,36,38 | 3 P50116,P80299,P82471                                                   |
| 1226 | 1,2,3,8,35, 4,5,6,7,33,<br>38,39,40 34,36,37 | 7 P00774,P11598,P11883,P36376,P55091,P98089,Q62635                       |
| 1227 | 1,2,3,8,36, 4,5,6,7,33,<br>37,38,39 34,35,40 | 0                                                                        |
| 1228 | 1,2,3,8,36, 4,5,6,7,33,<br>37,38,40 34,35,39 | 0                                                                        |
| 1229 | 1,2,3,8,36, 4,5,6,7,33,<br>37,39,40 34,35,38 | 1 P50116                                                                 |
| 1230 | 1,2,3,8,36, 4,5,6,7,33,<br>38,39,40 34,35,37 | 1 Q5BJY9                                                                 |
| 1231 | 1,2,3,8,37, 4,5,6,7,33,<br>38,39,40 34,35,36 | 4 P08494,P08721,P11883,Q5I0D7                                            |
| 1232 | 1,2,3,33,3 4,5,6,7,8,3<br>4,35,36,37 8,39,40 | 10 D3ZUC6,O89117,P22273,P25031,P50115,P50116,P51740,Q5QE79,Q6PCU2,Q99041 |
| 1233 | 1,2,3,33,3 4,5,6,7,8,3<br>4,35,36,38 7,39,40 | 7 D3ZUC6,P02091,P22273,P22282,P49134,P63029,Q99041                       |
| 1234 | 1,2,3,33,3 4,5,6,7,8,3<br>4,35,36,39 7,38,40 | 6 D3ZUC6,P22273,P49134,Q6PCU2,Q99041,Q99MH3                              |
| 1235 | 1,2,3,33,3 4,5,6,7,8,3<br>4,35,36,40 7,38,39 | 6 D3ZUC6,P22273,Q5QE79,Q6PCU2,Q99041,Q9Z0J6                              |
| 1236 | 1,2,3,33,3 4,5,6,7,8,3<br>4,35,37,38 6,39,40 | 2 B0BNN3,P22273                                                          |
| 1237 | 1,2,3,33,3 4,5,6,7,8,3<br>4,35,37,39 6,38,40 | 6 P22273,P25031,P50115,P50116,Q99041,Q99376                              |
| 1238 | 1,2,3,33,3 4,5,6,7,8,3<br>4,35,37,40 6,38,39 | 4 P22273,P50115,P50116,Q4G075                                            |
| 1239 | 1,2,3,33,3 4,5,6,7,8,3<br>4,35,38,39 6,37,40 | 8 P02091,P07171,P11598,P22273,P22282,P49134,Q63617,Q99041                |
| 1240 | 1,2,3,33,3 4,5,6,7,8,3<br>4,35,38,40 6,37,39 | 6 P07171,P11598,P22273,P22282,P63029,Q63617                              |
| 1241 | 1,2,3,33,3 4,5,6,7,8,3<br>4,35,39,40 6,37,38 | 7 P07171,P11598,P19218,P22273,P22282,Q63617,Q99041                       |
| 1242 | 1,2,3,33,3 4,5,6,7,8,3<br>4,36,37,38 5,39,40 | 3 P02091,P22273,Q99041                                                   |
| 1243 | 1,2,3,33,3 4,5,6,7,8,3<br>4,36,37,39 5,38,40 | 5 P22273,P25031,Q99041,Q99376,Q99MH3                                     |
| 1244 | 1,2,3,33,3 4,5,6,7,8,3<br>4,36,37,40 5,38,39 | 4 P22273,Q4G075,Q99041,Q9Z0J6                                            |

|      |                                              |                                                                                                      |
|------|----------------------------------------------|------------------------------------------------------------------------------------------------------|
| 1245 | 1,2,3,33,3 4,5,6,7,8,3<br>4,36,38,39 5,37,40 | 9 P01946,P02091,P19132,P22273,P22282,Q63617,Q64093,Q99041,Q99MH3                                     |
| 1246 | 1,2,3,33,3 4,5,6,7,8,3<br>4,36,38,40 5,37,39 | 7 P02091,P22273,P22282,P63029,Q63617,Q99041,Q9Z0J6                                                   |
| 1247 | 1,2,3,33,3 4,5,6,7,8,3<br>4,36,39,40 5,37,38 | 6 P19218,P22273,Q63617,Q99041,Q99MH3,Q9Z0J6                                                          |
| 1248 | 1,2,3,33,3 4,5,6,7,8,3<br>4,37,38,39 5,36,40 | 7 P02091,P22273,Q64093,Q6AY61,Q99041,Q99376,Q9EQV9                                                   |
| 1249 | 1,2,3,33,3 4,5,6,7,8,3<br>4,37,38,40 5,36,39 | 4 P63029,Q62714,Q6AY61,Q9Z1F2                                                                        |
| 1250 | 1,2,3,33,3 4,5,6,7,8,3<br>4,37,39,40 5,36,38 | 4 P19218,Q6AYQ8,Q99041,Q99376                                                                        |
| 1251 | 1,2,3,33,3 4,5,6,7,8,3<br>4,38,39,40 5,36,37 | 14 P02091,P07171,P11598,P19132,P19218,P22273,P22282,P48199,P55091,P97840,Q5I0D1,Q63617,Q64093,Q99041 |
| 1252 | 1,2,3,33,3 4,5,6,7,8,3<br>5,36,37,38 4,39,40 | 4 P22273,P49134,Q68G31,Q9Z0V6                                                                        |
| 1253 | 1,2,3,33,3 4,5,6,7,8,3<br>5,36,37,39 4,38,40 | 5 P22273,P25031,P49134,P50116,Q99041                                                                 |
| 1254 | 1,2,3,33,3 4,5,6,7,8,3<br>5,36,37,40 4,38,39 | 6 P22273,P50115,P50116,Q4G075,Q9WTT6,Q9Z0V6                                                          |
| 1255 | 1,2,3,33,3 4,5,6,7,8,3<br>5,36,38,39 4,37,40 | 7 P06760,P11598,P22273,P22282,P49134,Q63617,Q99041                                                   |
| 1256 | 1,2,3,33,3 4,5,6,7,8,3<br>5,36,38,40 4,37,39 | 9 P06760,P11598,P22273,P22282,P49134,P63029,Q63617,Q99041,Q9Z0V6                                     |
| 1257 | 1,2,3,33,3 4,5,6,7,8,3<br>5,36,39,40 4,37,38 | 7 P06760,P11598,P22273,P22282,P49134,Q63617,Q99041                                                   |
| 1258 | 1,2,3,33,3 4,5,6,7,8,3<br>5,37,38,39 4,36,40 | 2 Q68G31,Q99041                                                                                      |
| 1259 | 1,2,3,33,3 4,5,6,7,8,3<br>5,37,38,40 4,36,39 | 5 P22282,P63029,Q68G31,Q9Z0V6,Q9Z1F2                                                                 |
| 1260 | 1,2,3,33,3 4,5,6,7,8,3<br>5,37,39,40 4,36,38 | 4 P06760,P50115,P50116,Q68G31                                                                        |
| 1261 | 1,2,3,33,3 4,5,6,7,8,3<br>5,38,39,40 4,36,37 | 14 P06760,P06761,P0C0A9,P11598,P22273,P22282,P48199,P49134,P55091,P98089,Q62635,Q63617,Q68G31,Q99041 |
| 1262 | 1,2,3,33,3 4,5,6,7,8,3<br>6,37,38,39 4,35,40 | 3 P22273,Q68G31,Q99041                                                                               |
| 1263 | 1,2,3,33,3 4,5,6,7,8,3<br>6,37,38,40 4,35,39 | 4 P22273,Q9WTT6,Q9Z0V6,Q9Z1F2                                                                        |
| 1264 | 1,2,3,33,3 4,5,6,7,8,3<br>6,37,39,40 4,35,38 | 2 P50116,Q99041                                                                                      |

|      |                          |                        |         |                                                                                    |
|------|--------------------------|------------------------|---------|------------------------------------------------------------------------------------|
| 1265 | 1,2,3,33,3<br>6,38,39,40 | 4,5,6,7,8,3<br>4,35,37 | 7       | P06760,P11598,P22273,P22282,P48199,Q63617,Q99041                                   |
| 1266 | 1,2,3,33,3<br>7,38,39,40 | 4,5,6,7,8,3<br>4,35,36 | 5       | P48199,Q68G31,Q99041,Q9QX74,Q9Z1F2                                                 |
| 1267 | 1,2,3,34,3<br>5,36,37,38 | 4,5,6,7,8,3<br>3,39,40 | 4       | D3ZTE0,P02091,P22273,P25031                                                        |
| 1268 | 1,2,3,34,3<br>5,36,37,39 | 4,5,6,7,8,3<br>3,38,40 | 5       | P22273,P25031,P50115,P50116,Q99041                                                 |
| 1269 | 1,2,3,34,3<br>5,36,37,40 | 4,5,6,7,8,3<br>3,38,39 | 4       | P22273,P50115,P50116,Q4G075                                                        |
| 1270 | 1,2,3,34,3<br>5,36,38,39 | 4,5,6,7,8,3<br>3,37,40 | 8       | P02091,P0C0A9,P11598,P22273,P22282,Q63617,Q99041,Q9QW07                            |
| 1271 | 1,2,3,34,3<br>5,36,38,40 | 4,5,6,7,8,3<br>3,37,39 | 5       | P02091,P0C0A9,P22273,P22282,Q63617                                                 |
| 1272 | 1,2,3,34,3<br>5,36,39,40 | 4,5,6,7,8,3<br>3,37,38 | 5       | P22273,P50115,P50116,Q63617,Q99041                                                 |
| 1273 | 1,2,3,34,3<br>5,37,38,39 | 4,5,6,7,8,3<br>3,36,40 | 1       | P22273                                                                             |
| 1274 | 1,2,3,34,3<br>5,37,38,40 | 4,5,6,7,8,3<br>3,36,39 | 1       | P22273                                                                             |
| 1275 | 1,2,3,34,3<br>5,37,39,40 | 4,5,6,7,8,3<br>3,36,38 | 3       | P22273,P50115,P50116                                                               |
| 1276 | 1,2,3,34,3<br>5,38,39,40 | 4,5,6,7,8,3<br>3,36,37 | 12<br>7 | P00774,P06761,P07171,P0C0A9,P11598,P22273,P22282,P55091,P97580,P98089,Q62635,Q6361 |
| 1277 | 1,2,3,34,3<br>6,37,38,39 | 4,5,6,7,8,3<br>3,35,40 | 4       | P01946,P02091,P22273,Q99041                                                        |
| 1278 | 1,2,3,34,3<br>6,37,38,40 | 4,5,6,7,8,3<br>3,35,39 | 3       | P02091,P22273,Q4KLZ6                                                               |
| 1279 | 1,2,3,34,3<br>6,37,39,40 | 4,5,6,7,8,3<br>3,35,38 | 4       | P22273,P50115,P50116,Q99041                                                        |
| 1280 | 1,2,3,34,3<br>6,38,39,40 | 4,5,6,7,8,3<br>3,35,37 | 8       | P01946,P02091,P22273,P22282,P48032,Q63617,Q64093,Q99041                            |
| 1281 | 1,2,3,34,3<br>7,38,39,40 | 4,5,6,7,8,3<br>3,35,36 | 1       | Q6AY61                                                                             |
| 1282 | 1,2,3,35,3<br>6,37,38,39 | 4,5,6,7,8,3<br>3,34,40 | 4       | O54858,P22273,P25031,Q9QX74                                                        |
| 1283 | 1,2,3,35,3<br>6,37,38,40 | 4,5,6,7,8,3<br>3,34,39 | 5       | D3ZTE0,P06760,P22273,Q9QX74,Q9Z0V6                                                 |
| 1284 | 1,2,3,35,3<br>6,37,39,40 | 4,5,6,7,8,3<br>3,34,38 | 6       | P06760,P22273,P50115,P50116,Q4G075,Q9QX74                                          |

|      |                          |                                |    |                                                                                                                                                                                       |
|------|--------------------------|--------------------------------|----|---------------------------------------------------------------------------------------------------------------------------------------------------------------------------------------|
| 1285 | 1,2,3,35,3<br>6,38,39,40 | 4,5,6,7,8,3<br>3,34,37         | 10 | P06760,P06761,P0C0A9,P11598,P22273,P22282,P98089,Q62635,Q63617,Q9QX74                                                                                                                 |
| 1286 | 1,2,3,35,3<br>7,38,39,40 | 4,5,6,7,8,3<br>3,34,36         | 10 | P06760,P08494,P08649,P11598,P26772,P98089,Q62635,Q63751,Q9QW30,Q9QX74                                                                                                                 |
| 1287 | 1,2,3,36,3<br>7,38,39,40 | 4,5,6,7,8,3<br>3,34,35         | 4  | O54858,P06760,P19629,Q9QX74                                                                                                                                                           |
| 1288 | 1,2,4,5,6,7<br>,8,33     | 3,34,35,36<br>,37,38,39,<br>40 | 25 | B5DFC9,D3ZTX0,O35276,O54858,P02454,P02631,P11598,P16636,P17559,P22273,P23593,P35444,P42854,P48032,P52590,P80202,Q09030,Q4AEF8,Q63467,Q63751,Q91XN4,Q99PP0,Q9QW30,Q9QZQ5,Q9Z0J6        |
| 1289 | 1,2,4,5,6,7<br>,8,34     | 3,33,35,36<br>,37,38,39,<br>40 | 26 | B5DFC9,O35276,O35568,O54858,P02454,P02631,P0C0K7,P11030,P11598,P20762,P36374,P42854,P48199,P52590,Q30KJ2,Q4AEF8,Q63751,Q66H69,Q8K4G9,Q91XN4,Q99PP0,Q9JJ50,Q9QW30,Q9QZQ5,Q9Z0J6,Q9Z1F2 |
| 1290 | 1,2,4,5,6,7<br>,8,35     | 3,33,34,36<br>,37,38,39,<br>40 | 18 | O35276,O54858,P02454,P19218,P23593,P36374,P42854,P48032,P48199,P49744,P52590,Q4AEF8,Q64093,Q91XN4,Q99041,Q9QW30,Q9Z0J6,Q9Z1F2                                                         |
| 1291 | 1,2,4,5,6,7<br>,8,36     | 3,33,34,35<br>,37,38,39,<br>40 | 20 | B5DFC9,O35276,O54858,P02454,P11598,P19218,P42854,P48199,P52590,Q09030,Q4AEF8,Q63617,Q63751,Q91XN4,Q99PP0,Q9JJ50,Q9QW30,Q9QZQ5,Q9Z0J6,Q9Z1F2                                           |
| 1292 | 1,2,4,5,6,7<br>,8,37     | 3,33,34,35<br>,36,38,39,<br>40 | 24 | B5DFC9,O35276,O35568,O54858,P02454,P02631,P0C0A9,P0C0K7,P11598,P19218,P22273,P23593,P48032,P48199,P52590,P63029,Q00657,Q4AEF8,Q63617,Q66H69,Q91XN4,Q99041,Q9JJ50,Q9Z0J6               |
| 1293 | 1,2,4,5,6,7<br>,8,38     | 3,33,34,35<br>,36,37,39,<br>40 | 18 | B5DFC9,O35276,O35568,O54858,P02454,P19218,P19814,P22273,P36374,P49744,P50115,P50116,P52590,Q4AEF8,Q6IG05,Q6PCU2,Q91XN4,Q9Z0J6                                                         |
| 1294 | 1,2,4,5,6,7<br>,8,39     | 3,33,34,35<br>,36,37,38,<br>40 | 14 | O35276,O54858,P02454,P20762,P22273,P23593,P36374,P52590,P63029,Q4AEF8,Q6PCU2,Q91XN4,Q9Z0J6,Q9Z1F2                                                                                     |
| 1295 | 1,2,4,5,6,7<br>,8,40     | 3,33,34,35<br>,36,37,38,<br>39 | 16 | B5DFC9,O35276,O35568,O54858,P02454,P02631,P22273,P25031,P36374,P42854,P49744,P52590,Q4AEF8,Q91XN4,Q99041,Q9Z0J6                                                                       |
| 1296 | 1,2,4,5,6,7<br>,33,34    | 3,8,35,36,<br>37,38,39,4<br>0  | 15 | O35276,P08721,P11030,P11598,P16636,P19939,P42854,P52590,P80299,Q4AEF8,Q5I0D7,Q63751,Q91XN4,Q99PP0,Q9QW30                                                                              |
| 1297 | 1,2,4,5,6,7<br>,33,35    | 3,8,34,36,<br>37,38,39,4<br>0  | 7  | P08721,P16636,P42854,P52590,Q4AEF8,Q64093,Q9EQS0                                                                                                                                      |
| 1298 | 1,2,4,5,6,7<br>,33,36    | 3,8,34,35,<br>37,38,39,4<br>0  | 14 | P08721,P11598,P11883,P16636,P42854,P52590,Q09030,Q4AEF8,Q63751,Q91XN4,Q923V8,Q99PP0,Q9QW30,Q9QZQ5                                                                                     |

|      |                       |                               |                                                                                               |
|------|-----------------------|-------------------------------|-----------------------------------------------------------------------------------------------|
| 1299 | 1,2,4,5,6,7<br>,33,37 | 3,8,34,35,<br>36,38,39,4<br>0 | 8 D3ZTX0,P00762,P11598,P16636,P52590,Q4AEF8,Q63751,Q9QZ76                                     |
| 1300 | 1,2,4,5,6,7<br>,33,38 | 3,8,34,35,<br>36,37,39,4<br>0 | 6 O35276,P16636,P50116,P52590,Q4AEF8,Q923V8                                                   |
| 1301 | 1,2,4,5,6,7<br>,33,39 | 3,8,34,35,<br>36,37,38,4<br>0 | 8 D3ZTX0,P16636,P52590,Q4AEF8,Q6AYQ8,Q923V8,Q9QZ76,Q9Z0J6                                     |
| 1302 | 1,2,4,5,6,7<br>,33,40 | 3,8,34,35,<br>36,37,38,3<br>9 | 8 P01039,P16636,P42854,P52590,Q4AEF8,Q63751,Q91XN4,Q9EQS0                                     |
| 1303 | 1,2,4,5,6,7<br>,34,35 | 3,8,33,36,<br>37,38,39,4<br>0 | 8 O35276,P48199,P52590,Q4AEF8,Q5I0D7,Q80WL1,Q9QWN8,Q9Z1F2                                     |
| 1304 | 1,2,4,5,6,7<br>,34,36 | 3,8,33,35,<br>37,38,39,4<br>0 | 13 O35276,P11598,P11883,P48199,P52590,Q5I0D7,Q63751,Q80WL1,Q8K4G9,Q91XN4,Q9JJ50,Q9QWN8,Q9Z1F2 |
| 1305 | 1,2,4,5,6,7<br>,34,37 | 3,8,33,35,<br>36,38,39,4<br>0 | 8 O35276,P01835,P11598,P48199,P52590,Q4AEF8,Q80WL1,Q9JJ50                                     |
| 1306 | 1,2,4,5,6,7<br>,34,38 | 3,8,33,35,<br>36,37,39,4<br>0 | 9 O35276,P50116,P52590,P70549,P80299,Q4KLZ6,Q80WL1,Q9QWN8,Q9Z0J6                              |
| 1307 | 1,2,4,5,6,7<br>,34,39 | 3,8,33,35,<br>36,37,38,4<br>0 | 7 O35276,P20762,P52590,Q4AEF8,Q8K4G9,Q9Z0J6,Q9Z1F2                                            |
| 1308 | 1,2,4,5,6,7<br>,34,40 | 3,8,33,35,<br>36,37,38,3<br>9 | 4 O35276,P52590,Q80WL1,Q91XN4                                                                 |
| 1309 | 1,2,4,5,6,7<br>,35,36 | 3,8,33,34,<br>37,38,39,4<br>0 | 12 P00762,P19132,P19218,P48199,P52590,Q4AEF8,Q64093,Q923V8,Q9EQS0,Q9QWN8,Q9Z0J6,Q9Z1F2        |
| 1310 | 1,2,4,5,6,7<br>,35,37 | 3,8,33,34,<br>36,38,39,4<br>0 | 7 P00762,P19132,P19218,P52590,Q4AEF8,Q64093,Q9Z0J6                                            |
| 1311 | 1,2,4,5,6,7<br>,35,38 | 3,8,33,34,<br>36,37,39,4<br>0 | 13 O35276,P00762,P19218,P19814,P36374,P50116,P52590,Q4AEF8,Q6P6R2,Q7TP52,Q923V8,Q9QWN8,Q9Z0J6 |

|      |                       |                               |    |                                                                                                                                   |
|------|-----------------------|-------------------------------|----|-----------------------------------------------------------------------------------------------------------------------------------|
| 1312 | 1,2,4,5,6,7<br>,35,39 | 3,8,33,34,<br>36,37,38,4<br>0 | 5  | P00762,P52590,Q4AEF8,Q9Z0J6,Q9Z1F2                                                                                                |
| 1313 | 1,2,4,5,6,7<br>,35,40 | 3,8,33,34,<br>36,37,38,3<br>9 | 8  | P00762,P36374,P52590,Q4AEF8,Q64093,Q6P6R2,Q9EQS0,Q9Z0J6                                                                           |
| 1314 | 1,2,4,5,6,7<br>,36,37 | 3,8,33,34,<br>35,38,39,4<br>0 | 15 | P00762,P01835,P11598,P11883,P19132,P19218,P47967,P52590,P97840,Q4AEF8,Q5I0D1,Q6361<br>7,Q9JJ50,Q9QZ76,Q9Z0J6                      |
| 1315 | 1,2,4,5,6,7<br>,36,38 | 3,8,33,34,<br>35,37,39,4<br>0 | 9  | O35276,P00762,P19218,P19814,P50116,P52590,Q923V8,Q9QWN8,Q9Z0J6                                                                    |
| 1316 | 1,2,4,5,6,7<br>,36,39 | 3,8,33,34,<br>35,37,38,4<br>0 | 7  | P00762,P52590,Q4AEF8,Q923V8,Q9QZ76,Q9Z0J6,Q9Z1F2                                                                                  |
| 1317 | 1,2,4,5,6,7<br>,36,40 | 3,8,33,34,<br>35,37,38,3<br>9 | 7  | P00762,P52590,Q4AEF8,Q91XN4,Q923V8,Q9EQS0,Q9QWN8                                                                                  |
| 1318 | 1,2,4,5,6,7<br>,37,38 | 3,8,33,34,<br>35,36,39,4<br>0 | 10 | O35276,P00762,P01835,P11598,P14173,P19218,P19814,P52590,Q4AEF8,Q9Z0J6                                                             |
| 1319 | 1,2,4,5,6,7<br>,37,39 | 3,8,33,34,<br>35,36,38,4<br>0 | 8  | P00762,P01835,P11598,P52590,P63029,Q4AEF8,Q9QZ76,Q9Z0J6                                                                           |
| 1320 | 1,2,4,5,6,7<br>,37,40 | 3,8,33,34,<br>35,36,38,3<br>9 | 7  | P00762,P01835,P11598,P52590,Q4AEF8,Q9JJ50,Q9Z0J6                                                                                  |
| 1321 | 1,2,4,5,6,7<br>,38,39 | 3,8,33,34,<br>35,36,37,4<br>0 | 9  | O35276,P00762,P19814,P50116,Q4AEF8,Q63556,Q6PCU2,Q923V8,Q9Z0J6                                                                    |
| 1322 | 1,2,4,5,6,7<br>,38,40 | 3,8,33,34,<br>35,36,37,3<br>9 | 11 | O35276,P00762,P01835,P19814,P50116,P52590,Q4AEF8,Q6P6R2,Q6PCU2,Q923V8,Q9Z0J6                                                      |
| 1323 | 1,2,4,5,6,7<br>,39,40 | 3,8,33,34,<br>35,36,37,3<br>8 | 5  | P00762,P02625,P52590,Q4AEF8,Q9Z0J6                                                                                                |
| 1324 | 1,2,4,5,6,8<br>,33,34 | 3,7,35,36,<br>37,38,39,4<br>0 | 18 | G3V686,O35276,O54858,P08649,P16636,P19939,P35952,P42854,P52590,Q05702,Q09030,Q30<br>KJ2,Q63475,Q63751,Q91XN4,Q99PP0,Q9QW30,Q9QZQ5 |



|      |                       |                               |    |                                                                                                          |
|------|-----------------------|-------------------------------|----|----------------------------------------------------------------------------------------------------------|
| 1325 | 1,2,4,5,6,8<br>,33,35 | 3,7,34,36,<br>37,38,39,4<br>0 | 8  | O35276,O54858,P42854,P52590,Q09030,Q4AEF8,Q64093,Q9QZQ5                                                  |
| 1326 | 1,2,4,5,6,8<br>,33,36 | 3,7,34,35,<br>37,38,39,4<br>0 | 13 | O35276,O54728,O54858,P02454,P08649,P16636,P42854,P52590,Q09030,Q63751,Q91XN4,Q99PP0,Q9QZQ5               |
| 1327 | 1,2,4,5,6,8<br>,33,37 | 3,7,34,35,<br>36,38,39,4<br>0 | 8  | D3ZTX0,O54858,P16636,P52590,Q00657,Q09030,Q63751,Q9QZQ5                                                  |
| 1328 | 1,2,4,5,6,8<br>,33,38 | 3,7,34,35,<br>36,37,39,4<br>0 | 7  | O35276,O54858,P52590,Q09030,Q6IG05,Q91XN4,Q9QZQ5                                                         |
| 1329 | 1,2,4,5,6,8<br>,33,39 | 3,7,34,35,<br>36,37,38,4<br>0 | 9  | O54858,P16636,P20762,P23593,P42854,P52590,Q09030,Q4AEF8,Q9QZQ5                                           |
| 1330 | 1,2,4,5,6,8<br>,33,40 | 3,7,34,35,<br>36,37,38,3<br>9 | 11 | O35276,O54858,P02454,P16636,P25031,P42854,P52590,Q09030,Q63751,Q91XN4,Q9QZQ5                             |
| 1331 | 1,2,4,5,6,8<br>,34,35 | 3,7,33,36,<br>37,38,39,4<br>0 | 10 | O35276,O54858,P42854,P48199,P52590,P97580,Q30KJ2,Q5RKI1,Q64093,Q9Z1F2                                    |
| 1332 | 1,2,4,5,6,8<br>,34,36 | 3,7,33,35,<br>37,38,39,4<br>0 | 15 | G3V686,O35276,O54858,P08649,P42854,P48199,P52590,Q30KJ2,Q5RKI1,Q63751,Q91XN4,Q91ZS3,Q9JJ50,Q9QZQ5,Q9Z1F2 |
| 1333 | 1,2,4,5,6,8<br>,34,37 | 3,7,33,35,<br>36,38,39,4<br>0 | 7  | O35276,O54858,P48199,P52590,Q30KJ2,Q5RKI1,Q9JJ50                                                         |
| 1334 | 1,2,4,5,6,8<br>,34,38 | 3,7,33,35,<br>36,37,39,4<br>0 | 10 | O35276,O54858,P20762,P52590,P70549,P97580,Q30KJ2,Q4KLZ6,Q5RKI1,Q6IG05                                    |
| 1335 | 1,2,4,5,6,8<br>,34,39 | 3,7,33,35,<br>36,37,38,4<br>0 | 8  | O35276,O54858,P20762,P52590,P97580,Q30KJ2,Q9Z0V6,Q9Z1F2                                                  |
| 1336 | 1,2,4,5,6,8<br>,34,40 | 3,7,33,35,<br>36,37,38,3<br>9 | 9  | O35276,O54858,P15399,P42854,P52590,P97580,Q30KJ2,Q5RKI1,Q91XN4                                           |
| 1337 | 1,2,4,5,6,8<br>,35,36 | 3,7,33,34,<br>37,38,39,4<br>0 | 8  | O54858,P19218,P46720,P48199,P52590,Q5RKI1,Q64093,Q9Z1F2                                                  |

|      |                       |                               |                                                                  |
|------|-----------------------|-------------------------------|------------------------------------------------------------------|
| 1338 | 1,2,4,5,6,8<br>,35,37 | 3,7,33,34,<br>36,38,39,4<br>0 | 9 F1M3L7,P19218,P48199,P52590,P82471,Q00657,Q5RKI1,Q64093,Q9Z0J6 |
| 1339 | 1,2,4,5,6,8<br>,35,38 | 3,7,33,34,<br>36,37,39,4<br>0 | 9 O35276,O54858,P19218,P19814,P36374,P52590,Q5RKI1,Q64093,Q9Z0J6 |
| 1340 | 1,2,4,5,6,8<br>,35,39 | 3,7,33,34,<br>36,37,38,4<br>0 | 9 O54858,P20762,P23593,P36376,P54921,Q4AEF8,Q64093,Q9Z0J6,Q9Z1F2 |
| 1341 | 1,2,4,5,6,8<br>,35,40 | 3,7,33,34,<br>36,37,38,3<br>9 | 6 O54858,P52590,P54921,P82471,Q5RKI1,Q64093                      |
| 1342 | 1,2,4,5,6,8<br>,36,37 | 3,7,33,34,<br>35,38,39,4<br>0 | 8 F1M3L7,P19218,P52590,Q00657,Q5RKI1,Q64093,Q9JI85,Q9JJ50        |
| 1343 | 1,2,4,5,6,8<br>,36,38 | 3,7,33,34,<br>35,37,39,4<br>0 | 6 O35276,P19218,P19814,P52590,Q5RKI1,Q923V8                      |
| 1344 | 1,2,4,5,6,8<br>,36,39 | 3,7,33,34,<br>35,37,38,4<br>0 | 3 P20762,P52590,Q9Z1F2                                           |
| 1345 | 1,2,4,5,6,8<br>,36,40 | 3,7,33,34,<br>35,37,38,3<br>9 | 7 O54858,P07174,P42854,P52590,P82471,Q5RKI1,Q91XN4               |
| 1346 | 1,2,4,5,6,8<br>,37,38 | 3,7,33,34,<br>35,36,39,4<br>0 | 8 O35276,P19218,P52590,Q00657,Q5RKI1,Q6IG05,Q6PCU2,Q9Z0J6        |
| 1347 | 1,2,4,5,6,8<br>,37,39 | 3,7,33,34,<br>35,36,38,4<br>0 | 6 P20762,P23593,P52590,P63029,P82471,Q9Z0J6                      |
| 1348 | 1,2,4,5,6,8<br>,37,40 | 3,7,33,34,<br>35,36,38,3<br>9 | 4 P52590,P82471,Q5RKI1,Q64093                                    |
| 1349 | 1,2,4,5,6,8<br>,38,39 | 3,7,33,34,<br>35,36,37,4<br>0 | 4 O35276,P20762,Q6PCU2,Q9Z0J6                                    |
| 1350 | 1,2,4,5,6,8<br>,38,40 | 3,7,33,34,<br>35,36,37,3<br>9 | 7 O35276,O54858,P25031,P52590,P82471,Q5RKI1,Q6PCU2               |

|      |                        |                               |    |                                                                                                                                   |
|------|------------------------|-------------------------------|----|-----------------------------------------------------------------------------------------------------------------------------------|
| 1351 | 1,2,4,5,6,8<br>,39,40  | 3,7,33,34,<br>35,36,37,3<br>8 | 9  | O54858,P20762,P23593,P25031,P36376,P52590,P54921,P82471,Q6PCU2                                                                    |
| 1352 | 1,2,4,5,6,3<br>3,34,35 | 3,7,8,36,3<br>7,38,39,40      | 8  | D3ZUC6,P08721,P19939,P35280,P52590,Q5I0D7,Q64093,Q9EQS0                                                                           |
| 1353 | 1,2,4,5,6,3<br>3,34,36 | 3,7,8,35,3<br>7,38,39,40      | 18 | D3ZUC6,G3V686,O55145,P08494,P08649,P08721,P11883,P16636,P19939,P35280,P52590,P802<br>99,P97584,Q5I0D7,Q5QE79,Q63751,Q99MH3,Q9EQS0 |
| 1354 | 1,2,4,5,6,3<br>3,34,37 | 3,7,8,35,3<br>6,38,39,40      | 7  | D3ZTX0,P11883,P16636,P19939,P35280,P52590,Q63751                                                                                  |
| 1355 | 1,2,4,5,6,3<br>3,34,38 | 3,7,8,35,3<br>6,37,39,40      | 4  | P19939,P52590,P80299,Q4KLZ6                                                                                                       |
| 1356 | 1,2,4,5,6,3<br>3,34,39 | 3,7,8,35,3<br>6,37,38,40      | 2  | P35280,P52590                                                                                                                     |
| 1357 | 1,2,4,5,6,3<br>3,34,40 | 3,7,8,35,3<br>6,37,38,39      | 5  | P01039,P35280,P52590,Q63751,Q9EQS0                                                                                                |
| 1358 | 1,2,4,5,6,3<br>3,35,36 | 3,7,8,34,3<br>7,38,39,40      | 10 | P08721,P11883,P35280,P49134,P52590,Q05175,Q5I0D7,Q64093,Q923V8,Q9EQS0                                                             |
| 1359 | 1,2,4,5,6,3<br>3,35,37 | 3,7,8,34,3<br>6,38,39,40      | 6  | F1M3L7,P35280,P52590,Q64093,Q6AY41,Q9EQS0                                                                                         |
| 1360 | 1,2,4,5,6,3<br>3,35,38 | 3,7,8,34,3<br>6,37,39,40      | 4  | P52590,Q64093,Q6P6R2,Q923V8                                                                                                       |
| 1361 | 1,2,4,5,6,3<br>3,35,39 | 3,7,8,34,3<br>6,37,38,40      | 4  | P35280,P52590,Q811M5,Q9EQS0                                                                                                       |
| 1362 | 1,2,4,5,6,3<br>3,35,40 | 3,7,8,34,3<br>6,37,38,39      | 5  | P35280,P52590,Q64093,Q6AY41,Q9EQS0                                                                                                |
| 1363 | 1,2,4,5,6,3<br>3,36,37 | 3,7,8,34,3<br>5,38,39,40      | 6  | D3ZTX0,P11883,P16636,P35280,P52590,Q63751                                                                                         |
| 1364 | 1,2,4,5,6,3<br>3,36,38 | 3,7,8,34,3<br>5,37,39,40      | 5  | P16636,P36860,P52590,Q03191,Q923V8                                                                                                |
| 1365 | 1,2,4,5,6,3<br>3,36,39 | 3,7,8,34,3<br>5,37,38,40      | 5  | P16636,P35280,P36860,P52590,Q923V8                                                                                                |
| 1366 | 1,2,4,5,6,3<br>3,36,40 | 3,7,8,34,3<br>5,37,38,39      | 8  | P11883,P16636,P35280,P36860,P52590,Q63751,Q923V8,Q9EQS0                                                                           |
| 1367 | 1,2,4,5,6,3<br>3,37,38 | 3,7,8,34,3<br>5,36,39,40      | 1  | P52590                                                                                                                            |
| 1368 | 1,2,4,5,6,3<br>3,37,39 | 3,7,8,34,3<br>5,36,38,40      | 4  | D3ZTX0,O70417,P35280,P52590                                                                                                       |
| 1369 | 1,2,4,5,6,3<br>3,37,40 | 3,7,8,34,3<br>5,36,38,39      | 4  | P35280,P52590,Q64093,Q9EQS0                                                                                                       |
| 1370 | 1,2,4,5,6,3<br>3,38,39 | 3,7,8,34,3<br>5,36,37,40      | 3  | P52590,P70502,Q923V8                                                                                                              |

|      |                        |                          |    |                                                                                     |
|------|------------------------|--------------------------|----|-------------------------------------------------------------------------------------|
| 1371 | 1,2,4,5,6,3<br>3,38,40 | 3,7,8,34,3<br>5,36,37,39 | 6  | P01039,P25031,P36860,P52590,Q6P6R2,Q923V8                                           |
| 1372 | 1,2,4,5,6,3<br>3,39,40 | 3,7,8,34,3<br>5,36,37,38 | 4  | P01039,P35280,P52590,Q9EQS0                                                         |
| 1373 | 1,2,4,5,6,3<br>4,35,36 | 3,7,8,33,3<br>7,38,39,40 | 10 | P11883,P35280,P48199,P52590,Q5I0D7,Q5RKI1,Q64093,Q9EQS0,Q9QWN8,Q9Z1F2               |
| 1374 | 1,2,4,5,6,3<br>4,35,37 | 3,7,8,33,3<br>6,38,39,40 | 4  | P35280,P52590,Q5RKI1,Q64093                                                         |
| 1375 | 1,2,4,5,6,3<br>4,35,38 | 3,7,8,33,3<br>6,37,39,40 | 4  | P52590,Q4KLZ6,Q5RKI1,Q9QWN8                                                         |
| 1376 | 1,2,4,5,6,3<br>4,35,39 | 3,7,8,33,3<br>6,37,38,40 | 2  | P35280,Q9Z1F2                                                                       |
| 1377 | 1,2,4,5,6,3<br>4,35,40 | 3,7,8,33,3<br>6,37,38,39 | 6  | P07174,P35280,P52590,Q5RKI1,Q64093,Q9EQS0                                           |
| 1378 | 1,2,4,5,6,3<br>4,36,37 | 3,7,8,33,3<br>5,38,39,40 | 7  | O55145,P11883,P35280,P52590,Q4KLZ6,Q5RKI1,Q9JJ50                                    |
| 1379 | 1,2,4,5,6,3<br>4,36,38 | 3,7,8,33,3<br>5,37,39,40 | 5  | P52590,Q4KLZ6,Q5RKI1,Q923V8,Q9QWN8                                                  |
| 1380 | 1,2,4,5,6,3<br>4,36,39 | 3,7,8,33,3<br>5,37,38,40 | 3  | P35280,P52590,Q9Z1F2                                                                |
| 1381 | 1,2,4,5,6,3<br>4,36,40 | 3,7,8,33,3<br>5,37,38,39 | 7  | P07174,P11883,P35280,P52590,Q4KLZ6,Q5RKI1,Q9EQS0                                    |
| 1382 | 1,2,4,5,6,3<br>4,37,38 | 3,7,8,33,3<br>5,36,39,40 | 3  | P52590,Q4KLZ6,Q5RKI1                                                                |
| 1383 | 1,2,4,5,6,3<br>4,37,39 | 3,7,8,33,3<br>5,36,38,40 | 2  | O70417,P35280                                                                       |
| 1384 | 1,2,4,5,6,3<br>4,37,40 | 3,7,8,33,3<br>5,36,38,39 | 6  | P07174,P35280,P52590,Q4KLZ6,Q5RKI1,Q9JJ50                                           |
| 1385 | 1,2,4,5,6,3<br>4,38,39 | 3,7,8,33,3<br>5,36,37,40 | 1  | Q4KLZ6                                                                              |
| 1386 | 1,2,4,5,6,3<br>4,38,40 | 3,7,8,33,3<br>5,36,37,39 | 5  | P52590,P97580,Q4KLZ6,Q5RKI1,Q6P6R2                                                  |
| 1387 | 1,2,4,5,6,3<br>4,39,40 | 3,7,8,33,3<br>5,36,37,38 | 2  | P35280,P52590                                                                       |
| 1388 | 1,2,4,5,6,3<br>5,36,37 | 3,7,8,33,3<br>4,38,39,40 | 12 | F1M3L7,P11883,P12368,P19132,P19218,P25236,P35280,P46720,P52590,Q5RKI1,Q64093,Q9EQS0 |
| 1389 | 1,2,4,5,6,3<br>5,36,38 | 3,7,8,33,3<br>4,37,39,40 | 9  | P19218,P19814,P21674,P52590,Q5RKI1,Q64093,Q8VD89,Q923V8,Q9QWN8                      |
| 1390 | 1,2,4,5,6,3<br>5,36,39 | 3,7,8,33,3<br>4,37,38,40 | 7  | P23739,P35280,P52590,Q64093,Q923V8,Q9EQS0,Q9Z1F2                                    |

|      |                        |                           |    |                                                                                     |
|------|------------------------|---------------------------|----|-------------------------------------------------------------------------------------|
| 1391 | 1,2,4,5,6,3<br>5,36,40 | 3,7,8,33,3<br>4,37,38,39  | 9  | P02793;Q7TP54,P07174,P11883,P35280,P46720,P52590,Q5RKI1,Q64093,Q9EQS0               |
| 1392 | 1,2,4,5,6,3<br>5,37,38 | 3,7,8,33,3<br>4,36,39,40  | 8  | P14173,P19218,P19814,P52590,Q5RKI1,Q64093,Q9QX74,Q9Z0J6                             |
| 1393 | 1,2,4,5,6,3<br>5,37,39 | 3,7,8,33,3<br>4,36,38,40  | 6  | O70417,P00762,P02625,P35280,Q64093,Q9Z0J6                                           |
| 1394 | 1,2,4,5,6,3<br>5,37,40 | 3,7,8,33,3<br>4,36,38,39  | 12 | P00762,P02625,P07174,P19132,P35280,P52590,P82471,Q5RKI1,Q64093,Q6AY41,Q9EQS0,Q9QX74 |
| 1395 | 1,2,4,5,6,3<br>5,38,39 | 3,7,8,33,3<br>4,36,37,40  | 7  | P19814,P24368,P62898,P70502,Q6P6R2,Q923V8,Q9Z0J6                                    |
| 1396 | 1,2,4,5,6,3<br>5,38,40 | 3,7,8,33,3<br>4,36,37,39  | 6  | P19814,P52590,Q5RKI1,Q64093,Q6P6R2,Q9QX74                                           |
| 1397 | 1,2,4,5,6,3<br>5,39,40 | 3,7,8,33,3<br>4,36,37,38  | 8  | P02625,P35280,P52590,P54921,Q64093,Q6P6R2,Q9EQS0,Q9QX74                             |
| 1398 | 1,2,4,5,6,3<br>6,37,38 | 3,7,8,33,3<br>4,35,39,40  | 6  | P14173,P19218,P52590,Q4KLZ6,Q5RKI1,Q9QX74                                           |
| 1399 | 1,2,4,5,6,3<br>6,37,39 | 3,7,8,33,3<br>4,35,38,40  | 4  | O70417,P00762,P35280,P52590                                                         |
| 1400 | 1,2,4,5,6,3<br>6,37,40 | 3,7,8,33,3<br>4,35,38,39  | 12 | P00762,P07174,P11883,P35280,P52590,P82471,Q4KLZ6,Q5RKI1,Q64093,Q9EQS0,Q9JJ50,Q9QX74 |
| 1401 | 1,2,4,5,6,3<br>6,38,39 | 3,7,8,33,3<br>4,35,37,40  | 3  | P36860,P52590,Q923V8                                                                |
| 1402 | 1,2,4,5,6,3<br>6,38,40 | 3,7,8,33,3<br>4,35,37,39  | 6  | P36860,P52590,Q4KLZ6,Q5RKI1,Q923V8,Q9QX74                                           |
| 1403 | 1,2,4,5,6,3<br>6,39,40 | 3,7,8,33,3<br>4,35,37,38  | 4  | P35280,P52590,P54921,Q9EQS0                                                         |
| 1404 | 1,2,4,5,6,3<br>7,38,39 | 3,7,8,33,3<br>4,35,36,40  | 3  | P00762,Q9QX74,Q9Z0J6                                                                |
| 1405 | 1,2,4,5,6,3<br>7,38,40 | 3,7,8,33,3<br>4,35,36,39  | 7  | P01835,P14173,P52590,P82471,Q4KLZ6,Q5RKI1,Q9QX74                                    |
| 1406 | 1,2,4,5,6,3<br>7,39,40 | 3,7,8,33,3<br>4,35,36,38  | 7  | O70417,P00762,P02625,P35280,P52590,P82471,Q9QX74                                    |
| 1407 | 1,2,4,5,6,3<br>8,39,40 | 3,7,8,33,3<br>4,35,36,37  | 7  | P51740,P52590,P54921,P55091,Q6P6R2,Q6PCU2,Q9QX74                                    |
| 1408 | 1,2,4,5,7,8<br>,33,34  | 3,6,35,36,<br>37,38,39,40 | 9  | G3V686,O35276,P11030,P19939,P51740,P70549,Q63751,Q6AYQ8,Q9QX74                      |
| 1409 | 1,2,4,5,7,8<br>,33,35  | 3,6,34,36,<br>37,38,39,40 | 2  | P48032,P51740                                                                       |

|      |                       |                               |                                                           |
|------|-----------------------|-------------------------------|-----------------------------------------------------------|
| 1410 | 1,2,4,5,7,8<br>,33,36 | 3,6,34,35,<br>37,38,39,4<br>0 | 4 G3V686,O54728,P51740,Q63751                             |
| 1411 | 1,2,4,5,7,8<br>,33,37 | 3,6,34,35,<br>36,38,39,4<br>0 | 4 P48032,P51740,Q63751,Q6AYQ8                             |
| 1412 | 1,2,4,5,7,8<br>,33,38 | 3,6,34,35,<br>36,37,39,4<br>0 | 3 P70549,Q4G075,Q6IG05                                    |
| 1413 | 1,2,4,5,7,8<br>,33,39 | 3,6,34,35,<br>36,37,38,4<br>0 | 3 D3ZTE0,P20762,Q6AYQ8                                    |
| 1414 | 1,2,4,5,7,8<br>,33,40 | 3,6,34,35,<br>36,37,38,3<br>9 | 2 P00731,Q63751                                           |
| 1415 | 1,2,4,5,7,8<br>,34,35 | 3,6,33,36,<br>37,38,39,4<br>0 | 7 P20762,P48199,P51740,P70549,Q30KJ2,Q66H69,Q9Z1F2        |
| 1416 | 1,2,4,5,7,8<br>,34,36 | 3,6,33,35,<br>37,38,39,4<br>0 | 6 G3V686,P48199,P51740,Q63751,Q66H69,Q9Z1F2               |
| 1417 | 1,2,4,5,7,8<br>,34,37 | 3,6,33,35,<br>36,38,39,4<br>0 | 3 P06760,P51740,Q66H69                                    |
| 1418 | 1,2,4,5,7,8<br>,34,38 | 3,6,33,35,<br>36,37,39,4<br>0 | 8 O35276,P20762,P70549,Q30KJ2,Q4G075,Q6IFU8,Q6IG05,Q6P6Q2 |
| 1419 | 1,2,4,5,7,8<br>,34,39 | 3,6,33,35,<br>36,37,38,4<br>0 | 8 P20762,P63029,P70549,Q30KJ2,Q66H69,Q6AYQ8,Q9Z0V6,Q9Z1F2 |
| 1420 | 1,2,4,5,7,8<br>,34,40 | 3,6,33,35,<br>36,37,38,3<br>9 | 5 P20762,P70549,P97580,Q30KJ2,Q66H69                      |
| 1421 | 1,2,4,5,7,8<br>,35,36 | 3,6,33,34,<br>37,38,39,4<br>0 | 6 P19218,P48199,P51740,P97840,Q66H69,Q9Z1F2               |
| 1422 | 1,2,4,5,7,8<br>,35,37 | 3,6,33,34,<br>36,38,39,4<br>0 | 5 P19218,P48032,P51740,Q66H69,Q9Z0J6                      |

|      |                        |                               |                                                    |
|------|------------------------|-------------------------------|----------------------------------------------------|
| 1423 | 1,2,4,5,7,8<br>,35,38  | 3,6,33,34,<br>36,37,39,4<br>0 | 5 P19218,P19814,P36374,P70549,Q9Z0J6               |
| 1424 | 1,2,4,5,7,8<br>,35,39  | 3,6,33,34,<br>36,37,38,4<br>0 | 4 P20762,P63029,Q9Z0J6,Q9Z1F2                      |
| 1425 | 1,2,4,5,7,8<br>,35,40  | 3,6,33,34,<br>36,37,38,3<br>9 | 1 Q66H69                                           |
| 1426 | 1,2,4,5,7,8<br>,36,37  | 3,6,33,34,<br>35,38,39,4<br>0 | 7 P19218,P47967,P51740,P55091,P97840,Q5I0D1,Q66H69 |
| 1427 | 1,2,4,5,7,8<br>,36,38  | 3,6,33,34,<br>35,37,39,4<br>0 | 1 P19218                                           |
| 1428 | 1,2,4,5,7,8<br>,36,39  | 3,6,33,34,<br>35,37,38,4<br>0 | 3 P20762,P63029,Q9Z1F2                             |
| 1429 | 1,2,4,5,7,8<br>,36,40  | 3,6,33,34,<br>35,37,38,3<br>9 | 1 Q66H69                                           |
| 1430 | 1,2,4,5,7,8<br>,37,38  | 3,6,33,34,<br>35,36,39,4<br>0 | 7 P19218,P22006,Q6IFU8,Q6IG05,Q6P6Q2,Q6PCU2,Q9Z0J6 |
| 1431 | 1,2,4,5,7,8<br>,37,39  | 3,6,33,34,<br>35,36,38,4<br>0 | 5 P20762,P63029,Q66H69,Q6AYQ8,Q9Z0J6               |
| 1432 | 1,2,4,5,7,8<br>,37,40  | 3,6,33,34,<br>35,36,38,3<br>9 | 1 Q66H69                                           |
| 1433 | 1,2,4,5,7,8<br>,38,39  | 3,6,33,34,<br>35,36,37,4<br>0 | 6 P20762,P70549,Q4G075,Q63556,Q6PCU2,Q9Z0J6        |
| 1434 | 1,2,4,5,7,8<br>,38,40  | 3,6,33,34,<br>35,36,37,3<br>9 | 1 Q6PCU2                                           |
| 1435 | 1,2,4,5,7,8<br>,39,40  | 3,6,33,34,<br>35,36,37,3<br>8 | 3 P20762,Q6PCU2,Q9Z0J6                             |
| 1436 | 1,2,4,5,7,3<br>3,34,35 | 3,6,8,36,3<br>7,38,39,40      | 7 D3ZUC6,P08721,P19939,P51740,P80299,Q5I0D7,Q9R168 |

|      |                        |                          |                                                    |
|------|------------------------|--------------------------|----------------------------------------------------|
| 1437 | 1,2,4,5,7,3<br>3,34,36 | 3,6,8,35,3<br>7,38,39,40 | 7 G3V686,P08721,P19939,P51740,P80299,Q5I0D7,Q63751 |
| 1438 | 1,2,4,5,7,3<br>3,34,37 | 3,6,8,35,3<br>6,38,39,40 | 5 P19939,P51740,Q63751,Q6AYQ8,Q9R168               |
| 1439 | 1,2,4,5,7,3<br>3,34,38 | 3,6,8,35,3<br>6,37,39,40 | 6 P19939,P50116,P70549,P80299,Q6P6S4,Q9R168        |
| 1440 | 1,2,4,5,7,3<br>3,34,39 | 3,6,8,35,3<br>6,37,38,40 | 3 P70549,P80299,Q6AYQ8                             |
| 1441 | 1,2,4,5,7,3<br>3,34,40 | 3,6,8,35,3<br>6,37,38,39 | 4 P19939,P80299,Q63751,Q6AYQ8                      |
| 1442 | 1,2,4,5,7,3<br>3,35,36 | 3,6,8,34,3<br>7,38,39,40 | 5 P08721,P51740,P97840,Q923V8,Q9EQS0               |
| 1443 | 1,2,4,5,7,3<br>3,35,37 | 3,6,8,34,3<br>6,38,39,40 | 1 P51740                                           |
| 1444 | 1,2,4,5,7,3<br>3,35,38 | 3,6,8,34,3<br>6,37,39,40 | 3 Q03191,Q923V8,Q9R168                             |
| 1445 | 1,2,4,5,7,3<br>3,35,39 | 3,6,8,34,3<br>6,37,38,40 | 0                                                  |
| 1446 | 1,2,4,5,7,3<br>3,35,40 | 3,6,8,34,3<br>6,37,38,39 | 1 Q9EQS0                                           |
| 1447 | 1,2,4,5,7,3<br>3,36,37 | 3,6,8,34,3<br>5,38,39,40 | 4 P47967,P51740,P97840,Q63751                      |
| 1448 | 1,2,4,5,7,3<br>3,36,38 | 3,6,8,34,3<br>5,37,39,40 | 2 Q03191,Q923V8                                    |
| 1449 | 1,2,4,5,7,3<br>3,36,39 | 3,6,8,34,3<br>5,37,38,40 | 1 Q923V8                                           |
| 1450 | 1,2,4,5,7,3<br>3,36,40 | 3,6,8,34,3<br>5,37,38,39 | 2 Q63751,Q9EQS0                                    |
| 1451 | 1,2,4,5,7,3<br>3,37,38 | 3,6,8,34,3<br>5,36,39,40 | 0                                                  |
| 1452 | 1,2,4,5,7,3<br>3,37,39 | 3,6,8,34,3<br>5,36,38,40 | 2 Q6AYQ8,Q9QZ76                                    |
| 1453 | 1,2,4,5,7,3<br>3,37,40 | 3,6,8,34,3<br>5,36,38,39 | 1 Q6AYQ8                                           |
| 1454 | 1,2,4,5,7,3<br>3,38,39 | 3,6,8,34,3<br>5,36,37,40 | 4 P70502,Q63556,Q6AYQ8,Q923V8                      |
| 1455 | 1,2,4,5,7,3<br>3,38,40 | 3,6,8,34,3<br>5,36,37,39 | 4 P01039,P50116,Q03191,Q9QYP1                      |
| 1456 | 1,2,4,5,7,3<br>3,39,40 | 3,6,8,34,3<br>5,36,37,38 | 1 Q6AYQ8                                           |



|      |                        |                          |                                             |
|------|------------------------|--------------------------|---------------------------------------------|
| 1457 | 1,2,4,5,7,3<br>4,35,36 | 3,6,8,33,3<br>7,38,39,40 | 4 P51740,P97840,Q9QWN8,Q9Z1F2               |
| 1458 | 1,2,4,5,7,3<br>4,35,37 | 3,6,8,33,3<br>6,38,39,40 | 1 P51740                                    |
| 1459 | 1,2,4,5,7,3<br>4,35,38 | 3,6,8,33,3<br>6,37,39,40 | 4 P70549,P80299,Q9QWN8,Q9R168               |
| 1460 | 1,2,4,5,7,3<br>4,35,39 | 3,6,8,33,3<br>6,37,38,40 | 1 Q9Z1F2                                    |
| 1461 | 1,2,4,5,7,3<br>4,35,40 | 3,6,8,33,3<br>6,37,38,39 | 1 Q9EQS0                                    |
| 1462 | 1,2,4,5,7,3<br>4,36,37 | 3,6,8,33,3<br>5,38,39,40 | 5 P47967,P51740,P55091,P97840,Q9JJ50        |
| 1463 | 1,2,4,5,7,3<br>4,36,38 | 3,6,8,33,3<br>5,37,39,40 | 3 P80299,Q4KLZ6,Q9QWN8                      |
| 1464 | 1,2,4,5,7,3<br>4,36,39 | 3,6,8,33,3<br>5,37,38,40 | 1 Q9Z1F2                                    |
| 1465 | 1,2,4,5,7,3<br>4,36,40 | 3,6,8,33,3<br>5,37,38,39 | 0                                           |
| 1466 | 1,2,4,5,7,3<br>4,37,38 | 3,6,8,33,3<br>5,36,39,40 | 3 P14173,Q4KLZ6,Q6AY61                      |
| 1467 | 1,2,4,5,7,3<br>4,37,39 | 3,6,8,33,3<br>5,36,38,40 | 3 O70417,P63029,Q6AYQ8                      |
| 1468 | 1,2,4,5,7,3<br>4,37,40 | 3,6,8,33,3<br>5,36,38,39 | 2 Q4KLZ6,Q6AY61                             |
| 1469 | 1,2,4,5,7,3<br>4,38,39 | 3,6,8,33,3<br>5,36,37,40 | 3 P70549,P80299,Q63556                      |
| 1470 | 1,2,4,5,7,3<br>4,38,40 | 3,6,8,33,3<br>5,36,37,39 | 3 P70549,P80299,Q4KLZ6                      |
| 1471 | 1,2,4,5,7,3<br>4,39,40 | 3,6,8,33,3<br>5,36,37,38 | 1 P09656                                    |
| 1472 | 1,2,4,5,7,3<br>5,36,37 | 3,6,8,33,3<br>4,38,39,40 | 6 F1M3L7,P19132,P47967,P51740,P97840,Q5I0D1 |
| 1473 | 1,2,4,5,7,3<br>5,36,38 | 3,6,8,33,3<br>4,37,39,40 | 6 P19218,P19814,P21674,Q03191,Q923V8,Q9QWN8 |
| 1474 | 1,2,4,5,7,3<br>5,36,39 | 3,6,8,33,3<br>4,37,38,40 | 2 P23739,Q9Z1F2                             |
| 1475 | 1,2,4,5,7,3<br>5,36,40 | 3,6,8,33,3<br>4,37,38,39 | 3 P02793;Q7TP54,Q9EQS0,Q9QWN8               |
| 1476 | 1,2,4,5,7,3<br>5,37,38 | 3,6,8,33,3<br>4,36,39,40 | 6 P08649,P14173,P19218,P19814,Q7TP52,Q9Z0J6 |

|      |                        |                          |                                                    |
|------|------------------------|--------------------------|----------------------------------------------------|
| 1477 | 1,2,4,5,7,3<br>5,37,39 | 3,6,8,33,3<br>4,36,38,40 | 4 P00762,P02625,P63029,Q9Z0J6                      |
| 1478 | 1,2,4,5,7,3<br>5,37,40 | 3,6,8,33,3<br>4,36,38,39 | 3 P02625,P08649,P19132                             |
| 1479 | 1,2,4,5,7,3<br>5,38,39 | 3,6,8,33,3<br>4,36,37,40 | 4 P19814,P70502,Q63556,Q9Z0J6                      |
| 1480 | 1,2,4,5,7,3<br>5,38,40 | 3,6,8,33,3<br>4,36,37,39 | 3 P08649,P19814,Q6P6R2                             |
| 1481 | 1,2,4,5,7,3<br>5,39,40 | 3,6,8,33,3<br>4,36,37,38 | 1 P02625                                           |
| 1482 | 1,2,4,5,7,3<br>6,37,38 | 3,6,8,33,3<br>4,35,39,40 | 2 P14173,P97840                                    |
| 1483 | 1,2,4,5,7,3<br>6,37,39 | 3,6,8,33,3<br>4,35,38,40 | 2 P00762,P63029                                    |
| 1484 | 1,2,4,5,7,3<br>6,37,40 | 3,6,8,33,3<br>4,35,38,39 | 1 P08937                                           |
| 1485 | 1,2,4,5,7,3<br>6,38,39 | 3,6,8,33,3<br>4,35,37,40 | 1 Q923V8                                           |
| 1486 | 1,2,4,5,7,3<br>6,38,40 | 3,6,8,33,3<br>4,35,37,39 | 3 Q03191,Q923V8,Q9QWN8                             |
| 1487 | 1,2,4,5,7,3<br>6,39,40 | 3,6,8,33,3<br>4,35,37,38 | 1 O89117                                           |
| 1488 | 1,2,4,5,7,3<br>7,38,39 | 3,6,8,33,3<br>4,35,36,40 | 3 O89117,Q6PCU2,Q9Z0J6                             |
| 1489 | 1,2,4,5,7,3<br>7,38,40 | 3,6,8,33,3<br>4,35,36,39 | 4 P01835,P08649,P14173,Q6PCU2                      |
| 1490 | 1,2,4,5,7,3<br>7,39,40 | 3,6,8,33,3<br>4,35,36,38 | 5 O70417,O89117,P00762,P02625,Q6AYQ8               |
| 1491 | 1,2,4,5,7,3<br>8,39,40 | 3,6,8,33,3<br>4,35,36,37 | 7 O89117,P08649,P26772,P55091,Q63556,Q6P6R2,Q6PCU2 |
| 1492 | 1,2,4,5,8,3<br>3,34,35 | 3,6,7,36,3<br>7,38,39,40 | 4 D3ZUC6,P51740,Q30KJ2,Q5QE79                      |
| 1493 | 1,2,4,5,8,3<br>3,34,36 | 3,6,7,35,3<br>7,38,39,40 | 6 G3V686,O54728,P19939,P51740,Q5QE79,Q63751        |
| 1494 | 1,2,4,5,8,3<br>3,34,37 | 3,6,7,35,3<br>6,38,39,40 | 2 P51740,Q63751                                    |
| 1495 | 1,2,4,5,8,3<br>3,34,38 | 3,6,7,35,3<br>6,37,39,40 | 5 P70549,Q30KJ2,Q6IFU8,Q6IG05,Q6P6Q2               |
| 1496 | 1,2,4,5,8,3<br>3,34,39 | 3,6,7,35,3<br>6,37,38,40 | 6 G3V686,P20762,P70549,Q30KJ2,Q6AYQ8,Q9Z0V6        |

|      |                        |                          |   |                                           |
|------|------------------------|--------------------------|---|-------------------------------------------|
| 1497 | 1,2,4,5,8,3<br>3,34,40 | 3,6,7,35,3<br>6,37,38,39 | 4 | P15399,P97580,Q30KJ2,Q63751               |
| 1498 | 1,2,4,5,8,3<br>3,35,36 | 3,6,7,34,3<br>7,38,39,40 | 4 | O54728,P01681,P51740,Q5QE79               |
| 1499 | 1,2,4,5,8,3<br>3,35,37 | 3,6,7,34,3<br>6,38,39,40 | 2 | F1M3L7,P51740                             |
| 1500 | 1,2,4,5,8,3<br>3,35,38 | 3,6,7,34,3<br>6,37,39,40 | 0 |                                           |
| 1501 | 1,2,4,5,8,3<br>3,35,39 | 3,6,7,34,3<br>6,37,38,40 | 0 |                                           |
| 1502 | 1,2,4,5,8,3<br>3,35,40 | 3,6,7,34,3<br>6,37,38,39 | 0 |                                           |
| 1503 | 1,2,4,5,8,3<br>3,36,37 | 3,6,7,34,3<br>5,38,39,40 | 4 | F1M3L7,O54728,P51740,Q63751               |
| 1504 | 1,2,4,5,8,3<br>3,36,38 | 3,6,7,34,3<br>5,37,39,40 | 2 | O54728,Q03191                             |
| 1505 | 1,2,4,5,8,3<br>3,36,39 | 3,6,7,34,3<br>5,37,38,40 | 1 | O54728                                    |
| 1506 | 1,2,4,5,8,3<br>3,36,40 | 3,6,7,34,3<br>5,37,38,39 | 3 | O54728,P01681,Q63751                      |
| 1507 | 1,2,4,5,8,3<br>3,37,38 | 3,6,7,34,3<br>5,36,39,40 | 2 | Q6IG05,Q6P6Q2                             |
| 1508 | 1,2,4,5,8,3<br>3,37,39 | 3,6,7,34,3<br>5,36,38,40 | 1 | Q6AYQ8                                    |
| 1509 | 1,2,4,5,8,3<br>3,37,40 | 3,6,7,34,3<br>5,36,38,39 | 0 |                                           |
| 1510 | 1,2,4,5,8,3<br>3,38,39 | 3,6,7,34,3<br>5,36,37,40 | 1 | P19132                                    |
| 1511 | 1,2,4,5,8,3<br>3,38,40 | 3,6,7,34,3<br>5,36,37,39 | 2 | P25031,Q6P6Q2                             |
| 1512 | 1,2,4,5,8,3<br>3,39,40 | 3,6,7,34,3<br>5,36,37,38 | 0 |                                           |
| 1513 | 1,2,4,5,8,3<br>4,35,36 | 3,6,7,33,3<br>7,38,39,40 | 3 | P51740,Q5RKI1,Q9Z1F2                      |
| 1514 | 1,2,4,5,8,3<br>4,35,37 | 3,6,7,33,3<br>6,38,39,40 | 2 | P51740,Q5RKI1                             |
| 1515 | 1,2,4,5,8,3<br>4,35,38 | 3,6,7,33,3<br>6,37,39,40 | 6 | P70549,P97580,Q30KJ2,Q5RKI1,Q6IFU8,Q6IG05 |
| 1516 | 1,2,4,5,8,3<br>4,35,39 | 3,6,7,33,3<br>6,37,38,40 | 4 | P20762,Q30KJ2,Q9Z0V6,Q9Z1F2               |

|      |                        |                          |   |                                                         |
|------|------------------------|--------------------------|---|---------------------------------------------------------|
| 1517 | 1,2,4,5,8,3<br>4,35,40 | 3,6,7,33,3<br>6,37,38,39 | 4 | P15399,P97580,Q30KJ2,Q5RKI1                             |
| 1518 | 1,2,4,5,8,3<br>4,36,37 | 3,6,7,33,3<br>5,38,39,40 | 3 | P51740,P55091,Q5RKI1                                    |
| 1519 | 1,2,4,5,8,3<br>4,36,38 | 3,6,7,33,3<br>5,37,39,40 | 4 | Q30KJ2,Q4KLZ6,Q5RKI1,Q6IG05                             |
| 1520 | 1,2,4,5,8,3<br>4,36,39 | 3,6,7,33,3<br>5,37,38,40 | 2 | P20762,Q9Z1F2                                           |
| 1521 | 1,2,4,5,8,3<br>4,36,40 | 3,6,7,33,3<br>5,37,38,39 | 4 | P07174,P97580,Q30KJ2,Q5RKI1                             |
| 1522 | 1,2,4,5,8,3<br>4,37,38 | 3,6,7,33,3<br>5,36,39,40 | 7 | Q30KJ2,Q4KLZ6,Q5RKI1,Q6IFU8,Q6IG05,Q6IMF3,Q6P6Q2        |
| 1523 | 1,2,4,5,8,3<br>4,37,39 | 3,6,7,33,3<br>5,36,38,40 | 3 | P20762,P63029,Q9Z0V6                                    |
| 1524 | 1,2,4,5,8,3<br>4,37,40 | 3,6,7,33,3<br>5,36,38,39 | 5 | P15399,P97580,Q30KJ2,Q4KLZ6,Q5RKI1                      |
| 1525 | 1,2,4,5,8,3<br>4,38,39 | 3,6,7,33,3<br>5,36,37,40 | 7 | P20762,P70549,P97580,Q30KJ2,Q6IFU8,Q6P6Q2,Q9Z0V6        |
| 1526 | 1,2,4,5,8,3<br>4,38,40 | 3,6,7,33,3<br>5,36,37,39 | 8 | P15399,P70549,P97580,Q30KJ2,Q4KLZ6,Q5RKI1,Q6IFU8,Q6P6Q2 |
| 1527 | 1,2,4,5,8,3<br>4,39,40 | 3,6,7,33,3<br>5,36,37,38 | 4 | P15399,P20762,P97580,Q30KJ2                             |
| 1528 | 1,2,4,5,8,3<br>5,36,37 | 3,6,7,33,3<br>4,38,39,40 | 4 | F1M3L7,P19218,P51740,Q5RKI1                             |
| 1529 | 1,2,4,5,8,3<br>5,36,38 | 3,6,7,33,3<br>4,37,39,40 | 4 | P19218,P19814,P21674,Q5RKI1                             |
| 1530 | 1,2,4,5,8,3<br>5,36,39 | 3,6,7,33,3<br>4,37,38,40 | 3 | P23739,Q62714,Q9Z1F2                                    |
| 1531 | 1,2,4,5,8,3<br>5,36,40 | 3,6,7,33,3<br>4,37,38,39 | 3 | P02793;Q7TP54,P07174,Q5RKI1                             |
| 1532 | 1,2,4,5,8,3<br>5,37,38 | 3,6,7,33,3<br>4,36,39,40 | 4 | F1M3L7,P19218,P19814,Q5RKI1                             |
| 1533 | 1,2,4,5,8,3<br>5,37,39 | 3,6,7,33,3<br>4,36,38,40 | 1 | F1M3L7                                                  |
| 1534 | 1,2,4,5,8,3<br>5,37,40 | 3,6,7,33,3<br>4,36,38,39 | 4 | F1M3L7,P07174,P82471,Q5RKI1                             |
| 1535 | 1,2,4,5,8,3<br>5,38,39 | 3,6,7,33,3<br>4,36,37,40 | 1 | P19814                                                  |
| 1536 | 1,2,4,5,8,3<br>5,38,40 | 3,6,7,33,3<br>4,36,37,39 | 4 | P19814,P98089,Q5RKI1,Q62635                             |

|      |                         |                          |   |                                                                |
|------|-------------------------|--------------------------|---|----------------------------------------------------------------|
| 1537 | 1,2,4,5,8,3<br>5,39,40  | 3,6,7,33,3<br>4,36,37,38 | 2 | P00774,P54921                                                  |
| 1538 | 1,2,4,5,8,3<br>6,37,38  | 3,6,7,33,3<br>4,35,39,40 | 2 | P19218,Q5RKI1                                                  |
| 1539 | 1,2,4,5,8,3<br>6,37,39  | 3,6,7,33,3<br>4,35,38,40 | 1 | P63029                                                         |
| 1540 | 1,2,4,5,8,3<br>6,37,40  | 3,6,7,33,3<br>4,35,38,39 | 2 | P07174,Q5RKI1                                                  |
| 1541 | 1,2,4,5,8,3<br>6,38,39  | 3,6,7,33,3<br>4,35,37,40 | 0 |                                                                |
| 1542 | 1,2,4,5,8,3<br>6,38,40  | 3,6,7,33,3<br>4,35,37,39 | 1 | Q5RKI1                                                         |
| 1543 | 1,2,4,5,8,3<br>6,39,40  | 3,6,7,33,3<br>4,35,37,38 | 1 | P54921                                                         |
| 1544 | 1,2,4,5,8,3<br>7,38,39  | 3,6,7,33,3<br>4,35,36,40 | 2 | Q6P6Q2,Q6PCU2                                                  |
| 1545 | 1,2,4,5,8,3<br>7,38,40  | 3,6,7,33,3<br>4,35,36,39 | 4 | P22006,Q5RKI1,Q6P6Q2,Q6PCU2                                    |
| 1546 | 1,2,4,5,8,3<br>7,39,40  | 3,6,7,33,3<br>4,35,36,38 | 0 |                                                                |
| 1547 | 1,2,4,5,8,3<br>8,39,40  | 3,6,7,33,3<br>4,35,36,37 | 6 | D4A5U3,P54921,P55091,Q62635,Q6PCU2,Q8CIZ5                      |
| 1548 | 1,2,4,5,33,<br>34,35,36 | 3,6,7,8,37,<br>38,39,40  | 9 | D3ZUC6,P08721,P19939,P35280,P51740,Q05175,Q5I0D7,Q5QE79,Q9EQS0 |
| 1549 | 1,2,4,5,33,<br>34,35,37 | 3,6,7,8,36,<br>38,39,40  | 5 | D3ZUC6,P35280,P51740,P80020,Q5QE79                             |
| 1550 | 1,2,4,5,33,<br>34,35,38 | 3,6,7,8,36,<br>37,39,40  | 5 | D3ZUC6,P70549,P80299,P97829,Q9R168                             |
| 1551 | 1,2,4,5,33,<br>34,35,39 | 3,6,7,8,36,<br>37,38,40  | 2 | D3ZUC6,P35280                                                  |
| 1552 | 1,2,4,5,33,<br>34,35,40 | 3,6,7,8,36,<br>37,38,39  | 3 | D3ZUC6,P35280,Q9EQS0                                           |
| 1553 | 1,2,4,5,33,<br>34,36,37 | 3,6,7,8,35,<br>38,39,40  | 7 | P11883,P19939,P35280,P51740,P98089,Q5QE79,Q63751               |
| 1554 | 1,2,4,5,33,<br>34,36,38 | 3,6,7,8,35,<br>37,39,40  | 6 | D3ZUC6,P19939,P80299,Q03191,Q4KLZ6,Q923V8                      |
| 1555 | 1,2,4,5,33,<br>34,36,39 | 3,6,7,8,35,<br>37,38,40  | 2 | P35280,Q99041                                                  |
| 1556 | 1,2,4,5,33,<br>34,36,40 | 3,6,7,8,35,<br>37,38,39  | 5 | P07174,P35280,Q5QE79,Q63751,Q9EQS0                             |

|      |                                              |                                      |
|------|----------------------------------------------|--------------------------------------|
| 1557 | 1,2,4,5,33, 3,6,7,8,35,<br>34,37,38 36,39,40 | 2 P19939,Q4KLZ6                      |
| 1558 | 1,2,4,5,33, 3,6,7,8,35,<br>34,37,39 36,38,40 | 3 O70417,P35280,Q6AYQ8               |
| 1559 | 1,2,4,5,33, 3,6,7,8,35,<br>34,37,40 36,38,39 | 3 O70417,P35280,Q4KLZ6               |
| 1560 | 1,2,4,5,33, 3,6,7,8,35,<br>34,38,39 36,37,40 | 4 P19132,P70502,P70549,P80299        |
| 1561 | 1,2,4,5,33, 3,6,7,8,35,<br>34,38,40 36,37,39 | 5 P01039,P80299,P97829,Q4KLZ6,Q9QYP1 |
| 1562 | 1,2,4,5,33, 3,6,7,8,35,<br>34,39,40 36,37,38 | 2 P19218,P35280                      |
| 1563 | 1,2,4,5,33, 3,6,7,8,34,<br>35,36,37 38,39,40 | 5 F1M3L7,P35280,P51740,Q5QE79,Q9EQS0 |
| 1564 | 1,2,4,5,33, 3,6,7,8,34,<br>35,36,38 37,39,40 | 5 P21674,P49134,Q03191,Q05175,Q923V8 |
| 1565 | 1,2,4,5,33, 3,6,7,8,34,<br>35,36,39 37,38,40 | 4 P23739,P35280,P49134,Q9EQS0        |
| 1566 | 1,2,4,5,33, 3,6,7,8,34,<br>35,36,40 37,38,39 | 3 P07174,P35280,Q9EQS0               |
| 1567 | 1,2,4,5,33, 3,6,7,8,34,<br>35,37,38 36,39,40 | 0                                    |
| 1568 | 1,2,4,5,33, 3,6,7,8,34,<br>35,37,39 36,38,40 | 2 O70417,P35280                      |
| 1569 | 1,2,4,5,33, 3,6,7,8,34,<br>35,37,40 36,38,39 | 2 P35280,Q9EQS0                      |
| 1570 | 1,2,4,5,33, 3,6,7,8,34,<br>35,38,39 36,37,40 | 2 P70502,Q03191                      |
| 1571 | 1,2,4,5,33, 3,6,7,8,34,<br>35,38,40 36,37,39 | 3 P01039,Q03191,Q6P6R2               |
| 1572 | 1,2,4,5,33, 3,6,7,8,34,<br>35,39,40 36,37,38 | 3 P02625,P35280,Q9EQS0               |
| 1573 | 1,2,4,5,33, 3,6,7,8,34,<br>36,37,38 35,39,40 | 1 P36860                             |
| 1574 | 1,2,4,5,33, 3,6,7,8,34,<br>36,37,39 35,38,40 | 2 O70417,P35280                      |
| 1575 | 1,2,4,5,33, 3,6,7,8,34,<br>36,37,40 35,38,39 | 3 P07174,P35280,Q9EQS0               |
| 1576 | 1,2,4,5,33, 3,6,7,8,34,<br>36,38,39 35,37,40 | 4 P36860,Q03191,Q923V8,Q99041        |

|      |                                              |                                                    |
|------|----------------------------------------------|----------------------------------------------------|
| 1577 | 1,2,4,5,33, 3,6,7,8,34,<br>36,38,40 35,37,39 | 3 P36860,Q03191,Q923V8                             |
| 1578 | 1,2,4,5,33, 3,6,7,8,34,<br>36,39,40 35,37,38 | 3 P35280,P36860,Q9EQS0                             |
| 1579 | 1,2,4,5,33, 3,6,7,8,34,<br>37,38,39 35,36,40 | 1 P70502                                           |
| 1580 | 1,2,4,5,33, 3,6,7,8,34,<br>37,38,40 35,36,39 | 1 P14173                                           |
| 1581 | 1,2,4,5,33, 3,6,7,8,34,<br>37,39,40 35,36,38 | 3 O70417,P35280,Q6AYQ8                             |
| 1582 | 1,2,4,5,33, 3,6,7,8,34,<br>38,39,40 35,36,37 | 6 P01039,P36860,P55091,P70502,Q03191,Q6P6R2        |
| 1583 | 1,2,4,5,34, 3,6,7,8,33,<br>35,36,37 38,39,40 | 7 F1M3L7,P07174,P25031,P35280,P50115,P51740,Q5RKI1 |
| 1584 | 1,2,4,5,34, 3,6,7,8,33,<br>35,36,38 37,39,40 | 4 P21674,Q4KLZ6,Q5RKI1,Q9QWN8                      |
| 1585 | 1,2,4,5,34, 3,6,7,8,33,<br>35,36,39 37,38,40 | 4 P23739,P35280,Q62714,Q9Z1F2                      |
| 1586 | 1,2,4,5,34, 3,6,7,8,33,<br>35,36,40 37,38,39 | 4 P07174,P35280,Q5RKI1,Q9EQS0                      |
| 1587 | 1,2,4,5,34, 3,6,7,8,33,<br>35,37,38 36,39,40 | 2 Q4KLZ6,Q5RKI1                                    |
| 1588 | 1,2,4,5,34, 3,6,7,8,33,<br>35,37,39 36,38,40 | 3 O70417,P35280,P50115                             |
| 1589 | 1,2,4,5,34, 3,6,7,8,33,<br>35,37,40 36,38,39 | 7 O70417,P07174,P35280,P50115,Q4KLZ6,Q5RKI1,Q9EQS0 |
| 1590 | 1,2,4,5,34, 3,6,7,8,33,<br>35,38,39 36,37,40 | 2 P70502,Q9QW07                                    |
| 1591 | 1,2,4,5,34, 3,6,7,8,33,<br>35,38,40 36,37,39 | 3 Q4KLZ6,Q5RKI1,Q6P6R2                             |
| 1592 | 1,2,4,5,34, 3,6,7,8,33,<br>35,39,40 36,37,38 | 2 P35280,Q9EQS0                                    |
| 1593 | 1,2,4,5,34, 3,6,7,8,33,<br>36,37,38 35,39,40 | 2 Q4KLZ6,Q5RKI1                                    |
| 1594 | 1,2,4,5,34, 3,6,7,8,33,<br>36,37,39 35,38,40 | 2 O70417,P35280                                    |
| 1595 | 1,2,4,5,34, 3,6,7,8,33,<br>36,37,40 35,38,39 | 5 O70417,P07174,P35280,Q4KLZ6,Q5RKI1               |
| 1596 | 1,2,4,5,34, 3,6,7,8,33,<br>36,38,39 35,37,40 | 2 Q4KLZ6,Q9QW07                                    |

|      |                                              |                                                                                 |
|------|----------------------------------------------|---------------------------------------------------------------------------------|
| 1597 | 1,2,4,5,34, 3,6,7,8,33,<br>36,38,40 35,37,39 | 2 Q4KLZ6,Q5RKI1                                                                 |
| 1598 | 1,2,4,5,34, 3,6,7,8,33,<br>36,39,40 35,37,38 | 2 O70417,P35280                                                                 |
| 1599 | 1,2,4,5,34, 3,6,7,8,33,<br>37,38,39 35,36,40 | 1 Q4KLZ6                                                                        |
| 1600 | 1,2,4,5,34, 3,6,7,8,33,<br>37,38,40 35,36,39 | 3 P14173,Q4KLZ6,Q5RKI1                                                          |
| 1601 | 1,2,4,5,34, 3,6,7,8,33,<br>37,39,40 35,36,38 | 3 O70417,P35280,Q4KLZ6                                                          |
| 1602 | 1,2,4,5,34, 3,6,7,8,33,<br>38,39,40 35,36,37 | 2 P55091,Q4KLZ6                                                                 |
| 1603 | 1,2,4,5,35, 3,6,7,8,33,<br>36,37,38 34,39,40 | 5 F1M3L7,P14173,P19814,P21674,Q5RKI1                                            |
| 1604 | 1,2,4,5,35, 3,6,7,8,33,<br>36,37,39 34,38,40 | 4 F1M3L7,O70417,P23739,P35280                                                   |
| 1605 | 1,2,4,5,35, 3,6,7,8,33,<br>36,37,40 34,38,39 | 8 F1M3L7,P02793;Q7TP54,P07174,P19132,P35280,P50115,Q5RKI1,Q9EQS0                |
| 1606 | 1,2,4,5,35, 3,6,7,8,33,<br>36,38,39 34,37,40 | 5 P19814,P23739,Q03191,Q923V8,Q9QW07                                            |
| 1607 | 1,2,4,5,35, 3,6,7,8,33,<br>36,38,40 34,37,39 | 5 P02793;Q7TP54,P19814,P21674,Q03191,Q5RKI1                                     |
| 1608 | 1,2,4,5,35, 3,6,7,8,33,<br>36,39,40 34,37,38 | 4 P02625,P23739,P35280,Q9EQS0                                                   |
| 1609 | 1,2,4,5,35, 3,6,7,8,33,<br>37,38,39 34,36,40 | 4 P08649,P19814,P26772,P70502                                                   |
| 1610 | 1,2,4,5,35, 3,6,7,8,33,<br>37,38,40 34,36,39 | 6 P08649,P14173,P19814,P26772,Q5RKI1,Q9QX74                                     |
| 1611 | 1,2,4,5,35, 3,6,7,8,33,<br>37,39,40 34,36,38 | 6 O70417,P02625,P26772,P35280,P50115,Q9QX74                                     |
| 1612 | 1,2,4,5,35, 3,6,7,8,33,<br>38,39,40 34,36,37 | 11 P00774,P08649,P08723,P19814,P26772,P55091,P70502,P98089,Q62635,Q6P6R2,Q9QX74 |
| 1613 | 1,2,4,5,36, 3,6,7,8,33,<br>37,38,39 34,35,40 | 0                                                                               |
| 1614 | 1,2,4,5,36, 3,6,7,8,33,<br>37,38,40 34,35,39 | 5 P14173,P36860,Q4KLZ6,Q5RKI1,Q9QX74                                            |
| 1615 | 1,2,4,5,36, 3,6,7,8,33,<br>37,39,40 34,35,38 | 3 O70417,O89117,P35280                                                          |
| 1616 | 1,2,4,5,36, 3,6,7,8,33,<br>38,39,40 34,35,37 | 4 O89117,P36860,Q923V8,Q9QX74                                                   |



|      |                         |                               |    |                                                                                                                                                                |
|------|-------------------------|-------------------------------|----|----------------------------------------------------------------------------------------------------------------------------------------------------------------|
| 1617 | 1,2,4,5,37,<br>38,39,40 | 3,6,7,8,33,<br>34,35,36       | 7  | O89117,P08649,P14173,P19223,P26772,Q6PCU2,Q9QX74                                                                                                               |
| 1618 | 1,2,4,6,7,8<br>,33,34   | 3,5,35,36,<br>37,38,39,4<br>0 | 19 | G3V686,iRT-<br>Kit_WR_fusion,O54800,Q5DWW2,O54858,O55004,P02454,P02631,P08649,P11598,P42854,P802<br>99,Q30KJ2,Q4V885,Q63475,Q63751,Q91XN4,Q99PP0,Q9QW30,Q9QZQ5 |
| 1619 | 1,2,4,6,7,8<br>,33,35   | 3,5,34,36,<br>37,38,39,4<br>0 | 4  | O54858,P02631,P48032,Q4AEF8                                                                                                                                    |
| 1620 | 1,2,4,6,7,8<br>,33,36   | 3,5,34,35,<br>37,38,39,4<br>0 | 15 | G3V686,O54728,O54858,P02454,P02631,P08649,P11598,P42854,Q63493,Q63617,Q63751,Q91<br>XN4,Q99PP0,Q9QW30,Q9QZQ5                                                   |
| 1621 | 1,2,4,6,7,8<br>,33,37   | 3,5,34,35,<br>36,38,39,4<br>0 | 12 | O54858,P02631,P0C0A9,P11598,P22273,P22282,P48032,Q63493,Q63617,Q63751,Q6AYQ8,Q9<br>QW07                                                                        |
| 1622 | 1,2,4,6,7,8<br>,33,38   | 3,5,34,35,<br>36,37,39,4<br>0 | 3  | O54858,P02631,P50115                                                                                                                                           |
| 1623 | 1,2,4,6,7,8<br>,33,39   | 3,5,34,35,<br>36,37,38,4<br>0 | 7  | D3ZTE0,O54858,P02631,P04916,P20762,Q6AYQ8,Q9Z1F2                                                                                                               |
| 1624 | 1,2,4,6,7,8<br>,33,40   | 3,5,34,35,<br>36,37,38,3<br>9 | 5  | O54858,P02454,P02631,P11598,P42854                                                                                                                             |
| 1625 | 1,2,4,6,7,8<br>,34,35   | 3,5,33,36,<br>37,38,39,4<br>0 | 10 | G3V686,O54858,P02631,P11598,P20762,P50280,P97580,Q30KJ2,Q66H69,Q9Z1F2                                                                                          |
| 1626 | 1,2,4,6,7,8<br>,34,36   | 3,5,33,35,<br>37,38,39,4<br>0 | 12 | G3V686,O54858,P02631,P08649,P11598,Q30KJ2,Q63617,Q66H69,Q80WL1,Q91ZS3,Q9JI85,Q9<br>Z1F2                                                                        |
| 1627 | 1,2,4,6,7,8<br>,34,37   | 3,5,33,35,<br>36,38,39,4<br>0 | 14 | O54858,P01835,P02631,P06761,P0C0A9,P11598,P12020,P22273,P22282,Q30KJ2,Q63617,Q66H<br>69,Q99041,Q9JI85                                                          |
| 1628 | 1,2,4,6,7,8<br>,34,38   | 3,5,33,35,<br>36,37,39,4<br>0 | 9  | iRT-Kit_WR_fusion,O35276,O54858,P02631,P11598,P20762,P80299,P97580,Q30KJ2                                                                                      |
| 1629 | 1,2,4,6,7,8<br>,34,39   | 3,5,33,35,<br>36,37,38,4<br>0 | 9  | G3V686,O54858,P02631,P11598,P20762,P97580,Q30KJ2,Q9Z0V6,Q9Z1F2                                                                                                 |
| 1630 | 1,2,4,6,7,8<br>,34,40   | 3,5,33,35,<br>36,37,38,3<br>9 | 7  | O54858,P02631,P11598,P15399,P97580,Q30KJ2,Q66H69                                                                                                               |

|      |                       |                               |    |                                                                                            |
|------|-----------------------|-------------------------------|----|--------------------------------------------------------------------------------------------|
| 1631 | 1,2,4,6,7,8<br>,35,36 | 3,5,33,34,<br>37,38,39,4<br>0 | 5  | O54858,P11598,P19218,Q63617,Q9Z1F2                                                         |
| 1632 | 1,2,4,6,7,8<br>,35,37 | 3,5,33,34,<br>36,38,39,4<br>0 | 11 | P0C0A9,P11598,P19132,P19218,P22273,P22282,P48032,Q63617,Q66H69,Q99041,Q9Z0J6               |
| 1633 | 1,2,4,6,7,8<br>,35,38 | 3,5,33,34,<br>36,37,39,4<br>0 | 4  | P19218,P19814,Q99041,Q9Z0J6                                                                |
| 1634 | 1,2,4,6,7,8<br>,35,39 | 3,5,33,34,<br>36,37,38,4<br>0 | 5  | O54858,P20762,P23593,Q9Z0J6,Q9Z1F2                                                         |
| 1635 | 1,2,4,6,7,8<br>,35,40 | 3,5,33,34,<br>36,37,38,3<br>9 | 4  | O54858,P02631,P02793;Q7TP54,Q99041                                                         |
| 1636 | 1,2,4,6,7,8<br>,36,37 | 3,5,33,34,<br>35,38,39,4<br>0 | 13 | P06761,P06911,P0C0A9,P11598,P12020,P19132,P22273,P22282,P46462,Q5GRG2,Q63617,Q66H69,Q9JH85 |
| 1637 | 1,2,4,6,7,8<br>,36,38 | 3,5,33,34,<br>35,37,39,4<br>0 | 4  | P11598,P12020,P19218,Q63617                                                                |
| 1638 | 1,2,4,6,7,8<br>,36,39 | 3,5,33,34,<br>35,37,38,4<br>0 | 4  | P11598,P20762,Q63617,Q9Z1F2                                                                |
| 1639 | 1,2,4,6,7,8<br>,36,40 | 3,5,33,34,<br>35,37,38,3<br>9 | 7  | O54858,P02631,P06911,P11598,P12020,Q5GRG2,Q63617                                           |
| 1640 | 1,2,4,6,7,8<br>,37,38 | 3,5,33,34,<br>35,36,39,4<br>0 | 12 | P01835,P02631,P06911,P0C0A9,P11598,P12020,P19218,P22273,Q5GRG2,Q63617,Q99041,Q9Z0J6        |
| 1641 | 1,2,4,6,7,8<br>,37,39 | 3,5,33,34,<br>35,36,38,4<br>0 | 13 | P01835,P02631,P0C0A9,P11598,P12020,P20762,P22273,P22282,P23593,P63029,Q63617,Q6AYQ8,Q9Z0J6 |
| 1642 | 1,2,4,6,7,8<br>,37,40 | 3,5,33,34,<br>35,36,38,3<br>9 | 12 | P01835,P02631,P06911,P0C0A9,P11598,P12020,P22273,Q5GRG2,Q63617,Q66H69,Q99041,Q9QW07        |
| 1643 | 1,2,4,6,7,8<br>,38,39 | 3,5,33,34,<br>35,36,37,4<br>0 | 5  | D4A5U3,P20762,Q63618,Q6PCU2,Q9Z0J6                                                         |

|      |                        |                               |    |                                                                                     |
|------|------------------------|-------------------------------|----|-------------------------------------------------------------------------------------|
| 1644 | 1,2,4,6,7,8<br>,38,40  | 3,5,33,34,<br>35,36,37,3<br>9 | 5  | P02631,P12020,Q5GRG2,Q6PCU2,Q99041                                                  |
| 1645 | 1,2,4,6,7,8<br>,39,40  | 3,5,33,34,<br>35,36,37,3<br>8 | 5  | O54858,P02631,P20762,P22273,P54921                                                  |
| 1646 | 1,2,4,6,7,3<br>3,34,35 | 3,5,8,36,3<br>7,38,39,40      | 7  | D3ZUC6,G3V686,P08721,P80299,Q5I0D7,Q80WL1,Q9R168                                    |
| 1647 | 1,2,4,6,7,3<br>3,34,36 | 3,5,8,35,3<br>7,38,39,40      | 12 | D3ZUC6,G3V686,P07379,P08494,P08649,P08721,P11598,P80299,Q5I0D7,Q63751,Q80WL1,Q9R168 |
| 1648 | 1,2,4,6,7,3<br>3,34,37 | 3,5,8,35,3<br>6,38,39,40      | 7  | P0C0A9,P11598,P80299,Q63751,Q6AYQ8,Q80WL1,Q9R168                                    |
| 1649 | 1,2,4,6,7,3<br>3,34,38 | 3,5,8,35,3<br>6,37,39,40      | 7  | D3ZUC6,O54800;Q5DWV2,P50116,P80299,Q80WL1,Q9QYP1,Q9R168                             |
| 1650 | 1,2,4,6,7,3<br>3,34,39 | 3,5,8,35,3<br>6,37,38,40      | 3  | G3V686,P80299,Q6AYQ8                                                                |
| 1651 | 1,2,4,6,7,3<br>3,34,40 | 3,5,8,35,3<br>6,37,38,39      | 3  | P80299,Q80WL1,Q9QYP1                                                                |
| 1652 | 1,2,4,6,7,3<br>3,35,36 | 3,5,8,34,3<br>7,38,39,40      | 4  | D3ZUC6,P08721,P49134,Q9EQS0                                                         |
| 1653 | 1,2,4,6,7,3<br>3,35,37 | 3,5,8,34,3<br>6,38,39,40      | 2  | P11598,Q63617                                                                       |
| 1654 | 1,2,4,6,7,3<br>3,35,38 | 3,5,8,34,3<br>6,37,39,40      | 2  | P80299,Q9R168                                                                       |
| 1655 | 1,2,4,6,7,3<br>3,35,39 | 3,5,8,34,3<br>6,37,38,40      | 0  |                                                                                     |
| 1656 | 1,2,4,6,7,3<br>3,35,40 | 3,5,8,34,3<br>6,37,38,39      | 1  | Q9EQS0                                                                              |
| 1657 | 1,2,4,6,7,3<br>3,36,37 | 3,5,8,34,3<br>5,38,39,40      | 6  | P08723,P0C0A9,P11598,P11883,Q63617,Q63751                                           |
| 1658 | 1,2,4,6,7,3<br>3,36,38 | 3,5,8,34,3<br>5,37,39,40      | 2  | P80299,Q923V8                                                                       |
| 1659 | 1,2,4,6,7,3<br>3,36,39 | 3,5,8,34,3<br>5,37,38,40      | 1  | P07379                                                                              |
| 1660 | 1,2,4,6,7,3<br>3,36,40 | 3,5,8,34,3<br>5,37,38,39      | 2  | P07379,Q9EQS0                                                                       |
| 1661 | 1,2,4,6,7,3<br>3,37,38 | 3,5,8,34,3<br>5,36,39,40      | 1  | P11598                                                                              |
| 1662 | 1,2,4,6,7,3<br>3,37,39 | 3,5,8,34,3<br>5,36,38,40      | 2  | P11598,Q6AYQ8                                                                       |

|      |                        |                          |   |                                           |
|------|------------------------|--------------------------|---|-------------------------------------------|
| 1663 | 1,2,4,6,7,3<br>3,37,40 | 3,5,8,34,3<br>5,36,38,39 | 2 | P11598,Q9QW07                             |
| 1664 | 1,2,4,6,7,3<br>3,38,39 | 3,5,8,34,3<br>5,36,37,40 | 0 |                                           |
| 1665 | 1,2,4,6,7,3<br>3,38,40 | 3,5,8,34,3<br>5,36,37,39 | 2 | P01039,Q9QYP1                             |
| 1666 | 1,2,4,6,7,3<br>3,39,40 | 3,5,8,34,3<br>5,36,37,38 | 2 | P01039,Q6AYQ8                             |
| 1667 | 1,2,4,6,7,3<br>4,35,36 | 3,5,8,33,3<br>7,38,39,40 | 6 | P11598,P80299,Q80WL1,Q9EQS0,Q9QWN8,Q9Z1F2 |
| 1668 | 1,2,4,6,7,3<br>4,35,37 | 3,5,8,33,3<br>6,38,39,40 | 4 | P11598,P19132,Q80WL1,Q9R168               |
| 1669 | 1,2,4,6,7,3<br>4,35,38 | 3,5,8,33,3<br>6,37,39,40 | 4 | P80299,Q80WL1,Q9QWN8,Q9R168               |
| 1670 | 1,2,4,6,7,3<br>4,35,39 | 3,5,8,33,3<br>6,37,38,40 | 2 | Q80WL1,Q9Z1F2                             |
| 1671 | 1,2,4,6,7,3<br>4,35,40 | 3,5,8,33,3<br>6,37,38,39 | 2 | Q80WL1,Q9EQS0                             |
| 1672 | 1,2,4,6,7,3<br>4,36,37 | 3,5,8,33,3<br>5,38,39,40 | 5 | P01835,P11598,Q63617,Q80WL1,Q9JI85        |
| 1673 | 1,2,4,6,7,3<br>4,36,38 | 3,5,8,33,3<br>5,37,39,40 | 5 | P11598,P80299,Q4KLZ6,Q80WL1,Q9QWN8        |
| 1674 | 1,2,4,6,7,3<br>4,36,39 | 3,5,8,33,3<br>5,37,38,40 | 5 | G3V686,P11598,P80299,Q80WL1,Q9Z1F2        |
| 1675 | 1,2,4,6,7,3<br>4,36,40 | 3,5,8,33,3<br>5,37,38,39 | 3 | P11598,Q80WL1,Q9EQS0                      |
| 1676 | 1,2,4,6,7,3<br>4,37,38 | 3,5,8,33,3<br>5,36,39,40 | 5 | P01835,P11598,P80299,Q4KLZ6,Q80WL1        |
| 1677 | 1,2,4,6,7,3<br>4,37,39 | 3,5,8,33,3<br>5,36,38,40 | 4 | P01835,P11598,Q6AYQ8,Q80WL1               |
| 1678 | 1,2,4,6,7,3<br>4,37,40 | 3,5,8,33,3<br>5,36,38,39 | 4 | P01835,P11598,Q80WL1,Q9QW07               |
| 1679 | 1,2,4,6,7,3<br>4,38,39 | 3,5,8,33,3<br>5,36,37,40 | 4 | P01835,P80299,Q63618,Q80WL1               |
| 1680 | 1,2,4,6,7,3<br>4,38,40 | 3,5,8,33,3<br>5,36,37,39 | 6 | P01835,P15399,P80299,P97580,Q4KLZ6,Q80WL1 |
| 1681 | 1,2,4,6,7,3<br>4,39,40 | 3,5,8,33,3<br>5,36,37,38 | 1 | Q80WL1                                    |
| 1682 | 1,2,4,6,7,3<br>5,36,37 | 3,5,8,33,3<br>4,38,39,40 | 4 | P11598,P12368,P19132,Q63617               |

|      |                        |                          |                                                                  |
|------|------------------------|--------------------------|------------------------------------------------------------------|
| 1683 | 1,2,4,6,7,3<br>5,36,38 | 3,5,8,33,3<br>4,37,39,40 | 3 P19218,Q923V8,Q9QWN8                                           |
| 1684 | 1,2,4,6,7,3<br>5,36,39 | 3,5,8,33,3<br>4,37,38,40 | 2 Q62714,Q9Z1F2                                                  |
| 1685 | 1,2,4,6,7,3<br>5,36,40 | 3,5,8,33,3<br>4,37,38,39 | 3 P02793;Q7TP54,P19132,Q9EQS0                                    |
| 1686 | 1,2,4,6,7,3<br>5,37,38 | 3,5,8,33,3<br>4,36,39,40 | 2 P14173,P19218                                                  |
| 1687 | 1,2,4,6,7,3<br>5,37,39 | 3,5,8,33,3<br>4,36,38,40 | 2 P00762,Q9Z0J6                                                  |
| 1688 | 1,2,4,6,7,3<br>5,37,40 | 3,5,8,33,3<br>4,36,38,39 | 4 P02793;Q7TP54,P19132,Q99041,Q9EQS0                             |
| 1689 | 1,2,4,6,7,3<br>5,38,39 | 3,5,8,33,3<br>4,36,37,40 | 1 Q9Z0J6                                                         |
| 1690 | 1,2,4,6,7,3<br>5,38,40 | 3,5,8,33,3<br>4,36,37,39 | 3 P02793;Q7TP54,P98089,Q6P6R2                                    |
| 1691 | 1,2,4,6,7,3<br>5,39,40 | 3,5,8,33,3<br>4,36,37,38 | 3 P02625,P06760,Q9EQS0                                           |
| 1692 | 1,2,4,6,7,3<br>6,37,38 | 3,5,8,33,3<br>4,35,39,40 | 4 P01835,P11598,P14173,Q63617                                    |
| 1693 | 1,2,4,6,7,3<br>6,37,39 | 3,5,8,33,3<br>4,35,38,40 | 4 P00762,P01835,P11598,Q63617                                    |
| 1694 | 1,2,4,6,7,3<br>6,37,40 | 3,5,8,33,3<br>4,35,38,39 | 7 P00762,P01835,P08937,P11598,P19132,Q5GRG2,Q63617               |
| 1695 | 1,2,4,6,7,3<br>6,38,39 | 3,5,8,33,3<br>4,35,37,40 | 1 Q923V8                                                         |
| 1696 | 1,2,4,6,7,3<br>6,38,40 | 3,5,8,33,3<br>4,35,37,39 | 0                                                                |
| 1697 | 1,2,4,6,7,3<br>6,39,40 | 3,5,8,33,3<br>4,35,37,38 | 0                                                                |
| 1698 | 1,2,4,6,7,3<br>7,38,39 | 3,5,8,33,3<br>4,35,36,40 | 2 P01835,Q9Z0J6                                                  |
| 1699 | 1,2,4,6,7,3<br>7,38,40 | 3,5,8,33,3<br>4,35,36,39 | 5 P01835,P14173,P23739,Q5GRG2,Q9QX74                             |
| 1700 | 1,2,4,6,7,3<br>7,39,40 | 3,5,8,33,3<br>4,35,36,38 | 3 P00762,P01835,Q5GRG2                                           |
| 1701 | 1,2,4,6,7,3<br>8,39,40 | 3,5,8,33,3<br>4,35,36,37 | 6 P01835,P10758,P51740,P55091,Q62635,Q9QX74                      |
| 1702 | 1,2,4,6,8,3<br>3,34,35 | 3,5,7,36,3<br>7,38,39,40 | 9 D3ZUC6,G3V686,O55004,O89117,P08649,P35952,P80020,P97580,Q30KJ2 |

|      |                        |                          |    |                                                                                                   |
|------|------------------------|--------------------------|----|---------------------------------------------------------------------------------------------------|
| 1703 | 1,2,4,6,8,3<br>3,34,36 | 3,5,7,35,3<br>7,38,39,40 | 14 | D3ZUC6,G3V686,O54728,O55004,O89117,P08494,P08649,P18418,Q30KJ2,Q5QE79,Q63751,Q99MH3,Q9JI85,Q9QZQ5 |
| 1704 | 1,2,4,6,8,3<br>3,34,37 | 3,5,7,35,3<br>6,38,39,40 | 7  | O55004,P02631,P08649,P80020,Q30KJ2,Q63751,Q9JI85                                                  |
| 1705 | 1,2,4,6,8,3<br>3,34,38 | 3,5,7,35,3<br>6,37,39,40 | 8  | G3V686,O54800;Q5DWV2,P08649,P15399,P80299,P97580,Q30KJ2,Q63532                                    |
| 1706 | 1,2,4,6,8,3<br>3,34,39 | 3,5,7,35,3<br>6,37,38,40 | 7  | G3V686,P08649,P20762,P97580,Q30KJ2,Q63532,Q99MH3                                                  |
| 1707 | 1,2,4,6,8,3<br>3,34,40 | 3,5,7,35,3<br>6,37,38,39 | 8  | G3V686,O54858,O55004,P02631,P08649,P15399,P97580,Q30KJ2                                           |
| 1708 | 1,2,4,6,8,3<br>3,35,36 | 3,5,7,34,3<br>7,38,39,40 | 4  | G3V686,O54728,P08649,Q6AY61                                                                       |
| 1709 | 1,2,4,6,8,3<br>3,35,37 | 3,5,7,34,3<br>6,38,39,40 | 0  |                                                                                                   |
| 1710 | 1,2,4,6,8,3<br>3,35,38 | 3,5,7,34,3<br>6,37,39,40 | 1  | Q68G31                                                                                            |
| 1711 | 1,2,4,6,8,3<br>3,35,39 | 3,5,7,34,3<br>6,37,38,40 | 0  |                                                                                                   |
| 1712 | 1,2,4,6,8,3<br>3,35,40 | 3,5,7,34,3<br>6,37,38,39 | 0  |                                                                                                   |
| 1713 | 1,2,4,6,8,3<br>3,36,37 | 3,5,7,34,3<br>5,38,39,40 | 6  | O54728,P08649,P08723,P12020,Q63751,Q9JI85                                                         |
| 1714 | 1,2,4,6,8,3<br>3,36,38 | 3,5,7,34,3<br>5,37,39,40 | 3  | G3V686,O54728,P08649                                                                              |
| 1715 | 1,2,4,6,8,3<br>3,36,39 | 3,5,7,34,3<br>5,37,38,40 | 4  | G3V686,O54728,P08649,Q99MH3                                                                       |
| 1716 | 1,2,4,6,8,3<br>3,36,40 | 3,5,7,34,3<br>5,37,38,39 | 2  | O54728,P08649                                                                                     |
| 1717 | 1,2,4,6,8,3<br>3,37,38 | 3,5,7,34,3<br>5,36,39,40 | 1  | Q68G31                                                                                            |
| 1718 | 1,2,4,6,8,3<br>3,37,39 | 3,5,7,34,3<br>5,36,38,40 | 2  | Q6AYQ8,Q9QWN8                                                                                     |
| 1719 | 1,2,4,6,8,3<br>3,37,40 | 3,5,7,34,3<br>5,36,38,39 | 3  | P02631,Q5GRG2,Q9QW07                                                                              |
| 1720 | 1,2,4,6,8,3<br>3,38,39 | 3,5,7,34,3<br>5,36,37,40 | 1  | Q63532                                                                                            |
| 1721 | 1,2,4,6,8,3<br>3,38,40 | 3,5,7,34,3<br>5,36,37,39 | 2  | P01039,P25031                                                                                     |
| 1722 | 1,2,4,6,8,3<br>3,39,40 | 3,5,7,34,3<br>5,36,37,38 | 2  | P47967,P54921                                                                                     |

|      |                        |                          |   |                                                                |
|------|------------------------|--------------------------|---|----------------------------------------------------------------|
| 1723 | 1,2,4,6,8,3<br>4,35,36 | 3,5,7,33,3<br>7,38,39,40 | 9 | G3V686,P08649,P50280,P97580,Q30KJ2,Q5RKI1,Q6AY61,Q9JI85,Q9Z1F2 |
| 1724 | 1,2,4,6,8,3<br>4,35,37 | 3,5,7,33,3<br>6,38,39,40 | 5 | P50280,P97580,Q30KJ2,Q5RKI1,Q9JI85                             |
| 1725 | 1,2,4,6,8,3<br>4,35,38 | 3,5,7,33,3<br>6,37,39,40 | 4 | P15399,P97580,Q30KJ2,Q5RKI1                                    |
| 1726 | 1,2,4,6,8,3<br>4,35,39 | 3,5,7,33,3<br>6,37,38,40 | 5 | P15399,P20762,P97580,Q30KJ2,Q9Z1F2                             |
| 1727 | 1,2,4,6,8,3<br>4,35,40 | 3,5,7,33,3<br>6,37,38,39 | 5 | P15399,P50280,P97580,Q30KJ2,Q5RKI1                             |
| 1728 | 1,2,4,6,8,3<br>4,36,37 | 3,5,7,33,3<br>5,38,39,40 | 5 | P08649,P12020,Q30KJ2,Q5RKI1,Q9JI85                             |
| 1729 | 1,2,4,6,8,3<br>4,36,38 | 3,5,7,33,3<br>5,37,39,40 | 8 | G3V686,P08649,P12020,P15399,P97580,Q30KJ2,Q4KLZ6,Q5RKI1        |
| 1730 | 1,2,4,6,8,3<br>4,36,39 | 3,5,7,33,3<br>5,37,38,40 | 6 | G3V686,P08649,P20762,P97580,Q30KJ2,Q9Z1F2                      |
| 1731 | 1,2,4,6,8,3<br>4,36,40 | 3,5,7,33,3<br>5,37,38,39 | 8 | P07174,P08649,P12020,P15399,P97580,Q30KJ2,Q5RKI1,Q9JI85        |
| 1732 | 1,2,4,6,8,3<br>4,37,38 | 3,5,7,33,3<br>5,36,39,40 | 6 | P12020,P15399,P97580,Q30KJ2,Q4KLZ6,Q5RKI1                      |
| 1733 | 1,2,4,6,8,3<br>4,37,39 | 3,5,7,33,3<br>5,36,38,40 | 4 | P15399,P20762,P97580,Q30KJ2                                    |
| 1734 | 1,2,4,6,8,3<br>4,37,40 | 3,5,7,33,3<br>5,36,38,39 | 9 | P12020,P13432,P15399,P97580,Q30KJ2,Q5GRG2,Q5RKI1,Q9JI85,Q9QW07 |
| 1735 | 1,2,4,6,8,3<br>4,38,39 | 3,5,7,33,3<br>5,36,37,40 | 7 | D4A5U3,P15399,P20762,P97580,Q30KJ2,Q63532,Q63618               |
| 1736 | 1,2,4,6,8,3<br>4,38,40 | 3,5,7,33,3<br>5,36,37,39 | 5 | P15399,P97580,Q30KJ2,Q4KLZ6,Q5RKI1                             |
| 1737 | 1,2,4,6,8,3<br>4,39,40 | 3,5,7,33,3<br>5,36,37,38 | 7 | P15399,P20762,P47967,P54921,P97580,P97840,Q30KJ2               |
| 1738 | 1,2,4,6,8,3<br>5,36,37 | 3,5,7,33,3<br>4,38,39,40 | 5 | P12368,P19132,P19218,Q5RKI1,Q9JI85                             |
| 1739 | 1,2,4,6,8,3<br>5,36,38 | 3,5,7,33,3<br>4,37,39,40 | 3 | P19218,Q5RKI1,Q6AY61                                           |
| 1740 | 1,2,4,6,8,3<br>5,36,39 | 3,5,7,33,3<br>4,37,38,40 | 4 | P54921,Q62714,Q6AY61,Q9Z1F2                                    |
| 1741 | 1,2,4,6,8,3<br>5,36,40 | 3,5,7,33,3<br>4,37,38,39 | 5 | P02793;Q7TP54,P07174,P54921,Q5RKI1,Q6AY61                      |
| 1742 | 1,2,4,6,8,3<br>5,37,38 | 3,5,7,33,3<br>4,36,39,40 | 2 | P19218,Q5RKI1                                                  |

|      |                         |                          |                                                                                               |
|------|-------------------------|--------------------------|-----------------------------------------------------------------------------------------------|
| 1743 | 1,2,4,6,8,3<br>5,37,39  | 3,5,7,33,3<br>4,36,38,40 | 0                                                                                             |
| 1744 | 1,2,4,6,8,3<br>5,37,40  | 3,5,7,33,3<br>4,36,38,39 | 5 P19132,P82471,Q5RKI1,Q99041,Q9QW07                                                          |
| 1745 | 1,2,4,6,8,3<br>5,38,39  | 3,5,7,33,3<br>4,36,37,40 | 3 P54921,P98089,Q5EGZ1                                                                        |
| 1746 | 1,2,4,6,8,3<br>5,38,40  | 3,5,7,33,3<br>4,36,37,39 | 5 P54921,P98089,Q5EGZ1,Q5RKI1,Q62635                                                          |
| 1747 | 1,2,4,6,8,3<br>5,39,40  | 3,5,7,33,3<br>4,36,37,38 | 4 P00774,P47967,P54921,Q5EGZ1                                                                 |
| 1748 | 1,2,4,6,8,3<br>6,37,38  | 3,5,7,33,3<br>4,35,39,40 | 7 P06911,P12020,P19218,Q5GRG2,Q5RKI1,Q63474,Q9JI85                                            |
| 1749 | 1,2,4,6,8,3<br>6,37,39  | 3,5,7,33,3<br>4,35,38,40 | 4 P06911,P12020,Q5GRG2,Q9JI85                                                                 |
| 1750 | 1,2,4,6,8,3<br>6,37,40  | 3,5,7,33,3<br>4,35,38,39 | 10 P06911,P07174,P12020,P19629,P82471,Q5GRG2,Q5RKI1,Q6AYR9,Q9JI85,Q9QW07                      |
| 1751 | 1,2,4,6,8,3<br>6,38,39  | 3,5,7,33,3<br>4,35,37,40 | 0                                                                                             |
| 1752 | 1,2,4,6,8,3<br>6,38,40  | 3,5,7,33,3<br>4,35,37,39 | 4 P06911,P12020,Q5GRG2,Q5RKI1                                                                 |
| 1753 | 1,2,4,6,8,3<br>6,39,40  | 3,5,7,33,3<br>4,35,37,38 | 2 P12020,P54921                                                                               |
| 1754 | 1,2,4,6,8,3<br>7,38,39  | 3,5,7,33,3<br>4,35,36,40 | 2 P12020,Q5GRG2                                                                               |
| 1755 | 1,2,4,6,8,3<br>7,38,40  | 3,5,7,33,3<br>4,35,36,39 | 4 P06911,P12020,Q5GRG2,Q5RKI1                                                                 |
| 1756 | 1,2,4,6,8,3<br>7,39,40  | 3,5,7,33,3<br>4,35,36,38 | 3 P12020,P82471,Q5GRG2                                                                        |
| 1757 | 1,2,4,6,8,3<br>8,39,40  | 3,5,7,33,3<br>4,35,36,37 | 11 D4A5U3,P25031,P47967,P51740,P54921,P55091,P97840,P98089,Q62635,Q6PCU2,Q8CIZ5               |
| 1758 | 1,2,4,6,33,<br>34,35,36 | 3,5,7,8,37,<br>38,39,40  | 13 D3ZUC6,G3V686,O89117,P08494,P08649,P08721,P11883,P35280,P80020,P80299,Q5I0D7,Q5QE79,Q9EQS0 |
| 1759 | 1,2,4,6,33,<br>34,35,37 | 3,5,7,8,36,<br>38,39,40  | 4 D3ZUC6,P35280,P80020,Q9EQS0                                                                 |
| 1760 | 1,2,4,6,33,<br>34,35,38 | 3,5,7,8,36,<br>37,39,40  | 5 D3ZUC6,P80020,P80299,P97829,Q9R168                                                          |
| 1761 | 1,2,4,6,33,<br>34,35,39 | 3,5,7,8,36,<br>37,38,40  | 4 D3ZUC6,P35280,P80299,Q9EQS0                                                                 |
| 1762 | 1,2,4,6,33,<br>34,35,40 | 3,5,7,8,36,<br>37,38,39  | 5 D3ZUC6,P35280,P80020,P80299,Q9EQS0                                                          |



|      |                                              |                                                                          |
|------|----------------------------------------------|--------------------------------------------------------------------------|
| 1763 | 1,2,4,6,33, 3,5,7,8,35,<br>34,36,37 38,39,40 | 10 D3ZUC6,O55004,O55145,P08494,P08649,P11883,P35280,Q5QE79,Q63751,Q9JI85 |
| 1764 | 1,2,4,6,33, 3,5,7,8,35,<br>34,36,38 37,39,40 | 6 D3ZUC6,G3V686,P08494,P08649,P80299,Q4KLZ6                              |
| 1765 | 1,2,4,6,33, 3,5,7,8,35,<br>34,36,39 37,38,40 | 8 D3ZUC6,G3V686,P07379,P08494,P08649,P35280,P80299,Q99MH3                |
| 1766 | 1,2,4,6,33, 3,5,7,8,35,<br>34,36,40 37,38,39 | 8 D3ZUC6,P07379,P08494,P08649,P11883,P35280,P80299,Q9EQS0                |
| 1767 | 1,2,4,6,33, 3,5,7,8,35,<br>34,37,38 36,39,40 | 4 D3ZUC6,P80020,P80299,Q4KLZ6                                            |
| 1768 | 1,2,4,6,33, 3,5,7,8,35,<br>34,37,39 36,38,40 | 3 D3ZUC6,P35280,Q6AYQ8                                                   |
| 1769 | 1,2,4,6,33, 3,5,7,8,35,<br>34,37,40 36,38,39 | 3 P35280,P80020,Q9EQS0                                                   |
| 1770 | 1,2,4,6,33, 3,5,7,8,35,<br>34,38,39 36,37,40 | 3 D3ZUC6,P80299,Q63532                                                   |
| 1771 | 1,2,4,6,33, 3,5,7,8,35,<br>34,38,40 36,37,39 | 7 D3ZUC6,P01039,P15399,P80299,P97580,Q4KLZ6,Q9QYP1                       |
| 1772 | 1,2,4,6,33, 3,5,7,8,35,<br>34,39,40 36,37,38 | 8 D3ZUC6,P01039,P07379,P15399,P19218,P35280,P47967,Q9EQS0                |
| 1773 | 1,2,4,6,33, 3,5,7,8,34,<br>35,36,37 38,39,40 | 5 D3ZUC6,P11883,P12368,P35280,Q9EQS0                                     |
| 1774 | 1,2,4,6,33, 3,5,7,8,34,<br>35,36,38 37,39,40 | 4 D3ZUC6,P06760,P49134,Q923V8                                            |
| 1775 | 1,2,4,6,33, 3,5,7,8,34,<br>35,36,39 37,38,40 | 5 D3ZUC6,P06760,P35280,P49134,Q9EQS0                                     |
| 1776 | 1,2,4,6,33, 3,5,7,8,34,<br>35,36,40 37,38,39 | 6 D3ZUC6,P06760,P07174,P35280,P49134,Q9EQS0                              |
| 1777 | 1,2,4,6,33, 3,5,7,8,34,<br>35,37,38 36,39,40 | 1 Q68G31                                                                 |
| 1778 | 1,2,4,6,33, 3,5,7,8,34,<br>35,37,39 36,38,40 | 2 P35280,Q68G31                                                          |
| 1779 | 1,2,4,6,33, 3,5,7,8,34,<br>35,37,40 36,38,39 | 3 P35280,Q68G31,Q9EQS0                                                   |
| 1780 | 1,2,4,6,33, 3,5,7,8,34,<br>35,38,39 36,37,40 | 5 P06760,P49134,P70502,Q68G31,Q811M5                                     |
| 1781 | 1,2,4,6,33, 3,5,7,8,34,<br>35,38,40 36,37,39 | 5 P01039,P06760,Q68G31,Q6P6R2,Q9QYP1                                     |
| 1782 | 1,2,4,6,33, 3,5,7,8,34,<br>35,39,40 36,37,38 | 4 P06760,P35280,P47967,Q9EQS0                                            |

|      |                                             |                                                           |
|------|---------------------------------------------|-----------------------------------------------------------|
| 1783 | 1,2,4,6,33, 35,7,8,34,<br>36,37,38 35,39,40 | 1 Q68G31                                                  |
| 1784 | 1,2,4,6,33, 35,7,8,34,<br>36,37,39 35,38,40 | 1 P35280                                                  |
| 1785 | 1,2,4,6,33, 35,7,8,34,<br>36,37,40 35,38,39 | 8 O08815,P07174,P11883,P35280,Q5GRG2,Q9EQS0,Q9WTT6,Q9Z0V6 |
| 1786 | 1,2,4,6,33, 35,7,8,34,<br>36,38,39 35,37,40 | 3 P06760,P36860,Q923V8                                    |
| 1787 | 1,2,4,6,33, 35,7,8,34,<br>36,38,40 35,37,39 | 6 P01039,P06760,P36860,Q923V8,Q9QYP1,Q9Z0V6               |
| 1788 | 1,2,4,6,33, 35,7,8,34,<br>36,39,40 35,37,38 | 5 P06760,P07379,P35280,P36860,Q9EQS0                      |
| 1789 | 1,2,4,6,33, 35,7,8,34,<br>37,38,39 35,36,40 | 1 Q68G31                                                  |
| 1790 | 1,2,4,6,33, 35,7,8,34,<br>37,38,40 35,36,39 | 6 P01039,P14173,P19223,Q5GRG2,Q68G31,Q9QX74               |
| 1791 | 1,2,4,6,33, 35,7,8,34,<br>37,39,40 35,36,38 | 1 P35280                                                  |
| 1792 | 1,2,4,6,33, 35,7,8,34,<br>38,39,40 35,36,37 | 8 P01039,P06760,P47967,P51740,P55091,P97840,Q5I0D1,Q9QYP1 |
| 1793 | 1,2,4,6,34, 35,7,8,33,<br>35,36,37 38,39,40 | 8 P07174,P11883,P19132,P35280,Q5RKI1,Q80WL1,Q9EQS0,Q9JI85 |
| 1794 | 1,2,4,6,34, 35,7,8,33,<br>35,36,38 37,39,40 | 6 D3ZUC6,P80299,Q4KLZ6,Q5RKI1,Q80WL1,Q9QWN8               |
| 1795 | 1,2,4,6,34, 35,7,8,33,<br>35,36,39 37,38,40 | 5 P35280,P50137,Q62714,Q9EQS0,Q9Z1F2                      |
| 1796 | 1,2,4,6,34, 35,7,8,33,<br>35,36,40 37,38,39 | 5 P07174,P35280,Q5RKI1,Q80WL1,Q9EQS0                      |
| 1797 | 1,2,4,6,34, 35,7,8,33,<br>35,37,38 36,39,40 | 2 Q4KLZ6,Q5RKI1                                           |
| 1798 | 1,2,4,6,34, 35,7,8,33,<br>35,37,39 36,38,40 | 1 P35280                                                  |
| 1799 | 1,2,4,6,34, 35,7,8,33,<br>35,37,40 36,38,39 | 5 P07174,P35280,P80020,Q5RKI1,Q9EQS0                      |
| 1800 | 1,2,4,6,34, 35,7,8,33,<br>35,38,39 36,37,40 | 1 P80299                                                  |
| 1801 | 1,2,4,6,34, 35,7,8,33,<br>35,38,40 36,37,39 | 4 P15399,P97580,Q4KLZ6,Q5RKI1                             |
| 1802 | 1,2,4,6,34, 35,7,8,33,<br>35,39,40 36,37,38 | 5 P15399,P35280,P47967,P97580,Q9EQS0                      |

|      |                                              |                                                                                        |
|------|----------------------------------------------|----------------------------------------------------------------------------------------|
| 1803 | 1,2,4,6,34, 3,5,7,8,33,<br>36,37,38 35,39,40 | 2 Q4KLZ6,Q5RKI1                                                                        |
| 1804 | 1,2,4,6,34, 3,5,7,8,33,<br>36,37,39 35,38,40 | 1 P35280                                                                               |
| 1805 | 1,2,4,6,34, 3,5,7,8,33,<br>36,37,40 35,38,39 | 6 P07174,P11883,P35280,Q4KLZ6,Q5RKI1,Q9EQS0                                            |
| 1806 | 1,2,4,6,34, 3,5,7,8,33,<br>36,38,39 35,37,40 | 2 P80299,Q4KLZ6                                                                        |
| 1807 | 1,2,4,6,34, 3,5,7,8,33,<br>36,38,40 35,37,39 | 5 P15399,P80299,P97580,Q4KLZ6,Q5RKI1                                                   |
| 1808 | 1,2,4,6,34, 3,5,7,8,33,<br>36,39,40 35,37,38 | 3 P15399,P35280,Q9EQS0                                                                 |
| 1809 | 1,2,4,6,34, 3,5,7,8,33,<br>37,38,39 35,36,40 | 2 P01835,Q4KLZ6                                                                        |
| 1810 | 1,2,4,6,34, 3,5,7,8,33,<br>37,38,40 35,36,39 | 6 P01835,P14173,P15399,P97580,Q4KLZ6,Q5RKI1                                            |
| 1811 | 1,2,4,6,34, 3,5,7,8,33,<br>37,39,40 35,36,38 | 2 P15399,P35280                                                                        |
| 1812 | 1,2,4,6,34, 3,5,7,8,33,<br>38,39,40 35,36,37 | 7 P15399,P47967,P51740,P55091,P97580,P97840,Q4KLZ6                                     |
| 1813 | 1,2,4,6,35, 3,5,7,8,33,<br>36,37,38 34,39,40 | 2 P14173,Q5RKI1                                                                        |
| 1814 | 1,2,4,6,35, 3,5,7,8,33,<br>36,37,39 34,38,40 | 1 P35280                                                                               |
| 1815 | 1,2,4,6,35, 3,5,7,8,33,<br>36,37,40 34,38,39 | 9 P02793;Q7TP54,P06760,P07174,P12368,P19132,P35280,Q5RKI1,Q9EQS0,Q9QX74                |
| 1816 | 1,2,4,6,35, 3,5,7,8,33,<br>36,38,39 34,37,40 | 2 P06760,Q62714                                                                        |
| 1817 | 1,2,4,6,35, 3,5,7,8,33,<br>36,38,40 34,37,39 | 4 P02793;Q7TP54,P06760,Q5RKI1,Q9QX74                                                   |
| 1818 | 1,2,4,6,35, 3,5,7,8,33,<br>36,39,40 34,37,38 | 4 P06760,P35280,P54921,Q9EQS0                                                          |
| 1819 | 1,2,4,6,35, 3,5,7,8,33,<br>37,38,39 34,36,40 | 1 Q9QX74                                                                               |
| 1820 | 1,2,4,6,35, 3,5,7,8,33,<br>37,38,40 34,36,39 | 5 P06760,P14173,P19223,Q5RKI1,Q9QX74                                                   |
| 1821 | 1,2,4,6,35, 3,5,7,8,33,<br>37,39,40 34,36,38 | 6 P02625,P06760,P26772,P35280,Q9EQS0,Q9QX74                                            |
| 1822 | 1,2,4,6,35, 3,5,7,8,33,<br>38,39,40 34,36,37 | 12 P00774,P06760,P26772,P47967,P51740,P54921,P55091,P98089,Q5EGZ1,Q62635,Q6P6R2,Q9QX74 |

|      |                                              |                                                                                                       |
|------|----------------------------------------------|-------------------------------------------------------------------------------------------------------|
| 1823 | 1,2,4,6,36, 3,5,7,8,33,<br>37,38,39 34,35,40 | 2 Q63474,Q9QX74                                                                                       |
| 1824 | 1,2,4,6,36, 3,5,7,8,33,<br>37,38,40 34,35,39 | 8 P14173,P19629,Q4KLZ6,Q5GRG2,Q5RKI1,Q63474,Q9QX74,Q9Z0V6                                             |
| 1825 | 1,2,4,6,36, 3,5,7,8,33,<br>37,39,40 34,35,38 | 6 O35547,P06760,P19629,P35280,Q5GRG2,Q9QX74                                                           |
| 1826 | 1,2,4,6,36, 3,5,7,8,33,<br>38,39,40 34,35,37 | 6 P06760,P36860,P51740,P54921,P55091,Q9QX74                                                           |
| 1827 | 1,2,4,6,37, 3,5,7,8,33,<br>38,39,40 34,35,36 | 10 P01835,P06760,P14173,P19223,P26772,P47967,P51740,P55091,Q5GRG2,Q9QX74                              |
| 1828 | 1,2,4,7,8,3 3,5,6,36,3<br>3,34,35 7,38,39,40 | 6 D3ZUC6,G3V686,P80299,Q30KJ2,Q9QX74,Q9Z1F2                                                           |
| 1829 | 1,2,4,7,8,3 3,5,6,35,3<br>3,34,36 7,38,39,40 | 12 D3ZUC6,G3V686,iRT-<br>Kit_WR_fusion,O54728,O55004,P08721,P51740,P80299,Q63751,Q66H69,Q9QX74,Q9Z1F2 |
| 1830 | 1,2,4,7,8,3 3,5,6,35,3<br>3,34,37 6,38,39,40 | 7 O55004,P0C0A9,P51740,Q63751,Q66H69,Q6AYQ8,Q9JHB9                                                    |
| 1831 | 1,2,4,7,8,3 3,5,6,35,3<br>3,34,38 6,37,39,40 | 4 G3V686,iRT-Kit_WR_fusion,P80299,Q30KJ2                                                              |
| 1832 | 1,2,4,7,8,3 3,5,6,35,3<br>3,34,39 6,37,38,40 | 8 G3V686,P04916,P20762,P80299,Q30KJ2,Q6AYQ8,Q9Z0V6,Q9Z1F2                                             |
| 1833 | 1,2,4,7,8,3 3,5,6,35,3<br>3,34,40 6,37,38,39 | 5 G3V686,P15399,P97580,Q30KJ2,Q6AYQ8                                                                  |
| 1834 | 1,2,4,7,8,3 3,5,6,34,3<br>3,35,36 7,38,39,40 | 2 G3V686,O54728                                                                                       |
| 1835 | 1,2,4,7,8,3 3,5,6,34,3<br>3,35,37 6,38,39,40 | 3 P0C0A9,P48032,Q66H69                                                                                |
| 1836 | 1,2,4,7,8,3 3,5,6,34,3<br>3,35,38 6,37,39,40 | 0                                                                                                     |
| 1837 | 1,2,4,7,8,3 3,5,6,34,3<br>3,35,39 6,37,38,40 | 1 Q9Z1F2                                                                                              |
| 1838 | 1,2,4,7,8,3 3,5,6,34,3<br>3,35,40 6,37,38,39 | 0                                                                                                     |
| 1839 | 1,2,4,7,8,3 3,5,6,34,3<br>3,36,37 5,38,39,40 | 6 O54728,P08723,P0C0A9,P51740,Q63751,Q66H69                                                           |
| 1840 | 1,2,4,7,8,3 3,5,6,34,3<br>3,36,38 5,37,39,40 | 2 G3V686,O54728                                                                                       |
| 1841 | 1,2,4,7,8,3 3,5,6,34,3<br>3,36,39 5,37,38,40 | 4 G3V686,O54728,Q6AYQ8,Q9Z1F2                                                                         |
| 1842 | 1,2,4,7,8,3 3,5,6,34,3<br>3,36,40 5,37,38,39 | 2 O54728,P01681                                                                                       |

|      |                        |                          |                                                           |
|------|------------------------|--------------------------|-----------------------------------------------------------|
| 1843 | 1,2,4,7,8,3<br>3,37,38 | 3,5,6,34,3<br>5,36,39,40 | 1 Q6AYQ8                                                  |
| 1844 | 1,2,4,7,8,3<br>3,37,39 | 3,5,6,34,3<br>5,36,38,40 | 3 P04916,P0C0A9,Q6AYQ8                                    |
| 1845 | 1,2,4,7,8,3<br>3,37,40 | 3,5,6,34,3<br>5,36,38,39 | 5 P0C0A9,P30120,Q66H69,Q6AYQ8,Q9QW07                      |
| 1846 | 1,2,4,7,8,3<br>3,38,39 | 3,5,6,34,3<br>5,36,37,40 | 5 P04916,P17475,Q4G075,Q63556,Q6AYQ8                      |
| 1847 | 1,2,4,7,8,3<br>3,38,40 | 3,5,6,34,3<br>5,36,37,39 | 1 Q9QYP1                                                  |
| 1848 | 1,2,4,7,8,3<br>3,39,40 | 3,5,6,34,3<br>5,36,37,38 | 2 P04916,Q6AYQ8                                           |
| 1849 | 1,2,4,7,8,3<br>4,35,36 | 3,5,6,33,3<br>7,38,39,40 | 5 G3V686,P51740,Q30KJ2,Q66H69,Q9Z1F2                      |
| 1850 | 1,2,4,7,8,3<br>4,35,37 | 3,5,6,33,3<br>6,38,39,40 | 3 P51740,Q30KJ2,Q66H69                                    |
| 1851 | 1,2,4,7,8,3<br>4,35,38 | 3,5,6,33,3<br>6,37,39,40 | 4 P25809,P80299,P97580,Q30KJ2                             |
| 1852 | 1,2,4,7,8,3<br>4,35,39 | 3,5,6,33,3<br>6,37,38,40 | 5 P20762,Q30KJ2,Q66H69,Q9Z0V6,Q9Z1F2                      |
| 1853 | 1,2,4,7,8,3<br>4,35,40 | 3,5,6,33,3<br>6,37,38,39 | 4 P15399,P97580,Q30KJ2,Q66H69                             |
| 1854 | 1,2,4,7,8,3<br>4,36,37 | 3,5,6,33,3<br>5,38,39,40 | 6 P0C0A9,P51740,P62804,Q66H69,Q9JI85,Q9Z1F2               |
| 1855 | 1,2,4,7,8,3<br>4,36,38 | 3,5,6,33,3<br>5,37,39,40 | 4 G3V686,iRT-Kit_WR_fusion,P80299,Q30KJ2                  |
| 1856 | 1,2,4,7,8,3<br>4,36,39 | 3,5,6,33,3<br>5,37,38,40 | 5 G3V686,P20762,Q66H69,Q9Z0V6,Q9Z1F2                      |
| 1857 | 1,2,4,7,8,3<br>4,36,40 | 3,5,6,33,3<br>5,37,38,39 | 4 G3V686,P97580,Q30KJ2,Q66H69                             |
| 1858 | 1,2,4,7,8,3<br>4,37,38 | 3,5,6,33,3<br>5,36,39,40 | 2 P62804,Q30KJ2                                           |
| 1859 | 1,2,4,7,8,3<br>4,37,39 | 3,5,6,33,3<br>5,36,38,40 | 8 P0C0A9,P20762,P63029,Q63618,Q66H69,Q6AYQ8,Q9Z0V6,Q9Z1F2 |
| 1860 | 1,2,4,7,8,3<br>4,37,40 | 3,5,6,33,3<br>5,36,38,39 | 7 P0C0A9,P15399,P30120,P62804,P97580,Q30KJ2,Q66H69        |
| 1861 | 1,2,4,7,8,3<br>4,38,39 | 3,5,6,33,3<br>5,36,37,40 | 7 D4A5U3,P20762,P97580,Q30KJ2,Q4G075,Q63618,Q9Z0V6        |
| 1862 | 1,2,4,7,8,3<br>4,38,40 | 3,5,6,33,3<br>5,36,37,39 | 3 P15399,P97580,Q30KJ2                                    |

|      |                        |                          |   |                                                         |
|------|------------------------|--------------------------|---|---------------------------------------------------------|
| 1863 | 1,2,4,7,8,3<br>4,39,40 | 3,5,6,33,3<br>5,36,37,38 | 8 | P15399,P20762,P97580,Q30KJ2,Q63618,Q66H69,Q6AYQ8,Q9Z0V6 |
| 1864 | 1,2,4,7,8,3<br>5,36,37 | 3,5,6,33,3<br>4,38,39,40 | 3 | P19132,P51740,Q66H69                                    |
| 1865 | 1,2,4,7,8,3<br>5,36,38 | 3,5,6,33,3<br>4,37,39,40 | 1 | P19218                                                  |
| 1866 | 1,2,4,7,8,3<br>5,36,39 | 3,5,6,33,3<br>4,37,38,40 | 2 | Q62714,Q9Z1F2                                           |
| 1867 | 1,2,4,7,8,3<br>5,36,40 | 3,5,6,33,3<br>4,37,38,39 | 2 | P02793;Q7TP54,Q66H69                                    |
| 1868 | 1,2,4,7,8,3<br>5,37,38 | 3,5,6,33,3<br>4,36,39,40 | 1 | P19218                                                  |
| 1869 | 1,2,4,7,8,3<br>5,37,39 | 3,5,6,33,3<br>4,36,38,40 | 2 | P63029,Q66H69                                           |
| 1870 | 1,2,4,7,8,3<br>5,37,40 | 3,5,6,33,3<br>4,36,38,39 | 3 | P19132,Q66H69,Q99041                                    |
| 1871 | 1,2,4,7,8,3<br>5,38,39 | 3,5,6,33,3<br>4,36,37,40 | 2 | P20762,P98089                                           |
| 1872 | 1,2,4,7,8,3<br>5,38,40 | 3,5,6,33,3<br>4,36,37,39 | 2 | P98089,Q62635                                           |
| 1873 | 1,2,4,7,8,3<br>5,39,40 | 3,5,6,33,3<br>4,36,37,38 | 2 | P00774,P10758                                           |
| 1874 | 1,2,4,7,8,3<br>6,37,38 | 3,5,6,33,3<br>4,35,39,40 | 0 |                                                         |
| 1875 | 1,2,4,7,8,3<br>6,37,39 | 3,5,6,33,3<br>4,35,38,40 | 6 | P0C0A9,P63029,Q66H69,Q6AYR9,Q812E4,Q9Z1F2               |
| 1876 | 1,2,4,7,8,3<br>6,37,40 | 3,5,6,33,3<br>4,35,38,39 | 7 | P06911,P0C0A9,P30120,Q5GRG2,Q66H69,Q6AYR9,Q812E4        |
| 1877 | 1,2,4,7,8,3<br>6,38,39 | 3,5,6,33,3<br>4,35,37,40 | 0 |                                                         |
| 1878 | 1,2,4,7,8,3<br>6,38,40 | 3,5,6,33,3<br>4,35,37,39 | 0 |                                                         |
| 1879 | 1,2,4,7,8,3<br>6,39,40 | 3,5,6,33,3<br>4,35,37,38 | 0 |                                                         |
| 1880 | 1,2,4,7,8,3<br>7,38,39 | 3,5,6,33,3<br>4,35,36,40 | 3 | D4A5U3,Q63618,Q6PCU2                                    |
| 1881 | 1,2,4,7,8,3<br>7,38,40 | 3,5,6,33,3<br>4,35,36,39 | 2 | P19223,Q5GRG2                                           |
| 1882 | 1,2,4,7,8,3<br>7,39,40 | 3,5,6,33,3<br>4,35,36,38 | 3 | P21674,Q66H69,Q6AYQ8                                    |

|      |                         |                          |   |                                                                |
|------|-------------------------|--------------------------|---|----------------------------------------------------------------|
| 1883 | 1,2,4,7,8,3<br>8,39,40  | 3,5,6,33,3<br>4,35,36,37 | 9 | D4A5U3,P10758,P55091,P98089,Q5I0D7,Q62635,Q63618,Q6PCU2,Q8CIZ5 |
| 1884 | 1,2,4,7,33,<br>34,35,36 | 3,5,6,8,37,<br>38,39,40  | 6 | D3ZUC6,G3V686,P08721,P51740,P80299,Q9R168                      |
| 1885 | 1,2,4,7,33,<br>34,35,37 | 3,5,6,8,36,<br>38,39,40  | 6 | D3ZUC6,P25031,P51740,P80020,P80299,Q9R168                      |
| 1886 | 1,2,4,7,33,<br>34,35,38 | 3,5,6,8,36,<br>37,39,40  | 4 | D3ZUC6,P80299,Q9QYP1,Q9R168                                    |
| 1887 | 1,2,4,7,33,<br>34,35,39 | 3,5,6,8,36,<br>37,38,40  | 2 | D3ZUC6,P80299                                                  |
| 1888 | 1,2,4,7,33,<br>34,35,40 | 3,5,6,8,36,<br>37,38,39  | 5 | D3ZUC6,P80299,Q9EQS0,Q9QYP1,Q9R168                             |
| 1889 | 1,2,4,7,33,<br>34,36,37 | 3,5,6,8,35,<br>38,39,40  | 8 | D3ZUC6,P08721,P08723,P25031,P51740,P80299,Q63751,Q9R168        |
| 1890 | 1,2,4,7,33,<br>34,36,38 | 3,5,6,8,35,<br>37,39,40  | 5 | D3ZUC6,G3V686,P08721,P80299,Q9R168                             |
| 1891 | 1,2,4,7,33,<br>34,36,39 | 3,5,6,8,35,<br>37,38,40  | 5 | D3ZUC6,G3V686,P80299,Q6AYQ8,Q9Z1F2                             |
| 1892 | 1,2,4,7,33,<br>34,36,40 | 3,5,6,8,35,<br>37,38,39  | 4 | D3ZUC6,G3V686,P80299,Q9R168                                    |
| 1893 | 1,2,4,7,33,<br>34,37,38 | 3,5,6,8,35,<br>36,39,40  | 4 | B0BNN3,P80299,Q6AYQ8,Q9R168                                    |
| 1894 | 1,2,4,7,33,<br>34,37,39 | 3,5,6,8,35,<br>36,38,40  | 2 | P80299,Q6AYQ8                                                  |
| 1895 | 1,2,4,7,33,<br>34,37,40 | 3,5,6,8,35,<br>36,38,39  | 2 | Q6AYQ8,Q9R168                                                  |
| 1896 | 1,2,4,7,33,<br>34,38,39 | 3,5,6,8,35,<br>36,37,40  | 6 | P17475,P19132,P80299,Q63556,Q64093,Q6AYQ8                      |
| 1897 | 1,2,4,7,33,<br>34,38,40 | 3,5,6,8,35,<br>36,37,39  | 3 | P80299,Q9QYP1,Q9R168                                           |
| 1898 | 1,2,4,7,33,<br>34,39,40 | 3,5,6,8,35,<br>36,37,38  | 4 | P19218,P80299,Q6AYQ8,Q9QYP1                                    |
| 1899 | 1,2,4,7,33,<br>35,36,37 | 3,5,6,8,34,<br>38,39,40  | 3 | P25031,P51740,Q9R168                                           |
| 1900 | 1,2,4,7,33,<br>35,36,38 | 3,5,6,8,34,<br>37,39,40  | 2 | P49134,Q9R168                                                  |
| 1901 | 1,2,4,7,33,<br>35,36,39 | 3,5,6,8,34,<br>37,38,40  | 2 | P49134,Q62714                                                  |
| 1902 | 1,2,4,7,33,<br>35,36,40 | 3,5,6,8,34,<br>37,38,39  | 2 | Q9EQS0,Q9R168                                                  |

|      |                                              |                                             |
|------|----------------------------------------------|---------------------------------------------|
| 1903 | 1,2,4,7,33, 3,5,6,8,34,<br>35,37,38 36,39,40 | 3 B0BNN3,P14173,Q9R168                      |
| 1904 | 1,2,4,7,33, 3,5,6,8,34,<br>35,37,39 36,38,40 | 1 Q6AYQ8                                    |
| 1905 | 1,2,4,7,33, 3,5,6,8,34,<br>35,37,40 36,38,39 | 1 Q9R168                                    |
| 1906 | 1,2,4,7,33, 3,5,6,8,34,<br>35,38,39 36,37,40 | 1 P70502                                    |
| 1907 | 1,2,4,7,33, 3,5,6,8,34,<br>35,38,40 36,37,39 | 2 Q9QYP1,Q9R168                             |
| 1908 | 1,2,4,7,33, 3,5,6,8,34,<br>35,39,40 36,37,38 | 0                                           |
| 1909 | 1,2,4,7,33, 3,5,6,8,34,<br>36,37,38 35,39,40 | 2 P14173,Q9R168                             |
| 1910 | 1,2,4,7,33, 3,5,6,8,34,<br>36,37,39 35,38,40 | 1 Q6AYQ8                                    |
| 1911 | 1,2,4,7,33, 3,5,6,8,34,<br>36,37,40 35,38,39 | 1 O08815                                    |
| 1912 | 1,2,4,7,33, 3,5,6,8,34,<br>36,38,39 35,37,40 | 0                                           |
| 1913 | 1,2,4,7,33, 3,5,6,8,34,<br>36,38,40 35,37,39 | 1 Q9QYP1                                    |
| 1914 | 1,2,4,7,33, 3,5,6,8,34,<br>36,39,40 35,37,38 | 0                                           |
| 1915 | 1,2,4,7,33, 3,5,6,8,34,<br>37,38,39 35,36,40 | 2 P17475,Q6AYQ8                             |
| 1916 | 1,2,4,7,33, 3,5,6,8,34,<br>37,38,40 35,36,39 | 4 P14173,P19223,Q9QYP1,Q9R168               |
| 1917 | 1,2,4,7,33, 3,5,6,8,34,<br>37,39,40 35,36,38 | 2 P21674,Q6AYQ8                             |
| 1918 | 1,2,4,7,33, 3,5,6,8,34,<br>38,39,40 35,36,37 | 6 P01039,P17475,P55091,Q63556,Q6AYQ8,Q9QYP1 |
| 1919 | 1,2,4,7,34, 3,5,6,8,33,<br>35,36,37 38,39,40 | 4 P25031,P51740,Q80WL1,Q9R168               |
| 1920 | 1,2,4,7,34, 3,5,6,8,33,<br>35,36,38 37,39,40 | 4 P80299,Q80WL1,Q9QWN8,Q9R168               |
| 1921 | 1,2,4,7,34, 3,5,6,8,33,<br>35,36,39 37,38,40 | 3 P25031,Q62714,Q9Z1F2                      |
| 1922 | 1,2,4,7,34, 3,5,6,8,33,<br>35,36,40 37,38,39 | 3 Q80WL1,Q9EQS0,Q9R168                      |



|      |                                              |                                      |
|------|----------------------------------------------|--------------------------------------|
| 1923 | 1,2,4,7,34, 3,5,6,8,33,<br>35,37,38 36,39,40 | 3 P14173,P80299,Q9R168               |
| 1924 | 1,2,4,7,34, 3,5,6,8,33,<br>35,37,39 36,38,40 | 1 P25031                             |
| 1925 | 1,2,4,7,34, 3,5,6,8,33,<br>35,37,40 36,38,39 | 1 Q9R168                             |
| 1926 | 1,2,4,7,34, 3,5,6,8,33,<br>35,38,39 36,37,40 | 1 P80299                             |
| 1927 | 1,2,4,7,34, 3,5,6,8,33,<br>35,38,40 36,37,39 | 4 P10758,P80299,Q9QYP1,Q9R168        |
| 1928 | 1,2,4,7,34, 3,5,6,8,33,<br>35,39,40 36,37,38 | 1 P10758                             |
| 1929 | 1,2,4,7,34, 3,5,6,8,33,<br>36,37,38 35,39,40 | 4 P14173,P80299,Q4KLZ6,Q9R168        |
| 1930 | 1,2,4,7,34, 3,5,6,8,33,<br>36,37,39 35,38,40 | 2 P25031,Q9Z1F2                      |
| 1931 | 1,2,4,7,34, 3,5,6,8,33,<br>36,37,40 35,38,39 | 3 P07174,P08937,Q4KLZ6               |
| 1932 | 1,2,4,7,34, 3,5,6,8,33,<br>36,38,39 35,37,40 | 1 P80299                             |
| 1933 | 1,2,4,7,34, 3,5,6,8,33,<br>36,38,40 35,37,39 | 3 P80299,Q4KLZ6,Q9R168               |
| 1934 | 1,2,4,7,34, 3,5,6,8,33,<br>36,39,40 35,37,38 | 0                                    |
| 1935 | 1,2,4,7,34, 3,5,6,8,33,<br>37,38,39 35,36,40 | 4 P01835,P17475,Q63618,Q6AYQ8        |
| 1936 | 1,2,4,7,34, 3,5,6,8,33,<br>37,38,40 35,36,39 | 5 P01835,P14173,P19223,Q4KLZ6,Q9R168 |
| 1937 | 1,2,4,7,34, 3,5,6,8,33,<br>37,39,40 35,36,38 | 1 Q6AYQ8                             |
| 1938 | 1,2,4,7,34, 3,5,6,8,33,<br>38,39,40 35,36,37 | 5 P10758,P17475,P55091,P80299,Q63618 |
| 1939 | 1,2,4,7,35, 3,5,6,8,33,<br>36,37,38 34,39,40 | 3 P14173,P25031,Q9R168               |
| 1940 | 1,2,4,7,35, 3,5,6,8,33,<br>36,37,39 34,38,40 | 1 P25031                             |
| 1941 | 1,2,4,7,35, 3,5,6,8,33,<br>36,37,40 34,38,39 | 4 P02793;Q7TP54,P07174,P19132,Q9EQS0 |
| 1942 | 1,2,4,7,35, 3,5,6,8,33,<br>36,38,39 34,37,40 | 1 Q62714                             |

|      |                                              |                                                                          |
|------|----------------------------------------------|--------------------------------------------------------------------------|
| 1943 | 1,2,4,7,35, 3,5,6,8,33,<br>36,38,40 34,37,39 | 1 P02793;Q7TP54                                                          |
| 1944 | 1,2,4,7,35, 3,5,6,8,33,<br>36,39,40 34,37,38 | 2 P10758,Q9EQS0                                                          |
| 1945 | 1,2,4,7,35, 3,5,6,8,33,<br>37,38,39 34,36,40 | 1 P14173                                                                 |
| 1946 | 1,2,4,7,35, 3,5,6,8,33,<br>37,38,40 34,36,39 | 4 P08649,P14173,P19223,P26772                                            |
| 1947 | 1,2,4,7,35, 3,5,6,8,33,<br>37,39,40 34,36,38 | 2 P02625,P26772                                                          |
| 1948 | 1,2,4,7,35, 3,5,6,8,33,<br>38,39,40 34,36,37 | 6 P00774,P10758,P26772,P55091,P98089,Q62635                              |
| 1949 | 1,2,4,7,36, 3,5,6,8,33,<br>37,38,39 34,35,40 | 1 P14173                                                                 |
| 1950 | 1,2,4,7,36, 3,5,6,8,33,<br>37,38,40 34,35,39 | 1 P14173                                                                 |
| 1951 | 1,2,4,7,36, 3,5,6,8,33,<br>37,39,40 34,35,38 | 0                                                                        |
| 1952 | 1,2,4,7,36, 3,5,6,8,33,<br>38,39,40 34,35,37 | 1 P10758                                                                 |
| 1953 | 1,2,4,7,37, 3,5,6,8,33,<br>38,39,40 34,35,36 | 10 O89117,P01835,P14173,P17046,P17475,P19223,P26772,P55091,Q5I0D7,Q9QX74 |
| 1954 | 1,2,4,8,33, 3,5,6,7,37,<br>34,35,36 38,39,40 | 8 D3ZUC6,G3V686,O54728,O55004,P51740,Q30KJ2,Q5QE79,Q6AY61                |
| 1955 | 1,2,4,8,33, 3,5,6,7,36,<br>34,35,37 38,39,40 | 5 D3ZUC6,P25809,P51740,P80020,Q30KJ2                                     |
| 1956 | 1,2,4,8,33, 3,5,6,7,36,<br>34,35,38 37,39,40 | 6 D3ZUC6,G3V686,P25809,P80299,P97580,Q30KJ2                              |
| 1957 | 1,2,4,8,33, 3,5,6,7,36,<br>34,35,39 37,38,40 | 4 D3ZUC6,G3V686,P20762,Q30KJ2                                            |
| 1958 | 1,2,4,8,33, 3,5,6,7,36,<br>34,35,40 37,38,39 | 4 D3ZUC6,P15399,P97580,Q30KJ2                                            |
| 1959 | 1,2,4,8,33, 3,5,6,7,35,<br>34,36,37 38,39,40 | 8 D3ZUC6,G3V686,O54728,O55004,P08723,P51740,Q5QE79,Q63751                |
| 1960 | 1,2,4,8,33, 3,5,6,7,35,<br>34,36,38 37,39,40 | 5 D3ZUC6,G3V686,O54728,P80299,Q30KJ2                                     |
| 1961 | 1,2,4,8,33, 3,5,6,7,35,<br>34,36,39 37,38,40 | 4 D3ZUC6,G3V686,O54728,Q9Z1F2                                            |
| 1962 | 1,2,4,8,33, 3,5,6,7,35,<br>34,36,40 37,38,39 | 6 D3ZUC6,G3V686,O54728,P15399,P97580,Q30KJ2                              |

|      |                                              |                                                    |
|------|----------------------------------------------|----------------------------------------------------|
| 1963 | 1,2,4,8,33, 3,5,6,7,35,<br>34,37,38 36,39,40 | 2 B0BNN3,Q30KJ2                                    |
| 1964 | 1,2,4,8,33, 3,5,6,7,35,<br>34,37,39 36,38,40 | 3 Q30KJ2,Q6AYQ8,Q9QWN8                             |
| 1965 | 1,2,4,8,33, 3,5,6,7,35,<br>34,37,40 36,38,39 | 7 P13432,P15399,P24368,P30120,P97580,Q30KJ2,Q9QWN8 |
| 1966 | 1,2,4,8,33, 3,5,6,7,35,<br>34,38,39 36,37,40 | 6 G3V686,P19132,P20762,P80299,P97580,Q30KJ2        |
| 1967 | 1,2,4,8,33, 3,5,6,7,35,<br>34,38,40 36,37,39 | 5 P15399,P80299,P97580,Q30KJ2,Q9QYP1               |
| 1968 | 1,2,4,8,33, 3,5,6,7,35,<br>34,39,40 36,37,38 | 6 P15399,P19218,P47967,P97580,Q30KJ2,Q6AYQ8        |
| 1969 | 1,2,4,8,33, 3,5,6,7,34,<br>35,36,37 38,39,40 | 4 O54728,P08723,P50116,P51740                      |
| 1970 | 1,2,4,8,33, 3,5,6,7,34,<br>35,36,38 37,39,40 | 3 O54728,P49134,Q6AY61                             |
| 1971 | 1,2,4,8,33, 3,5,6,7,34,<br>35,36,39 37,38,40 | 5 O54728,P20767,P49134,Q62714,Q6AY61               |
| 1972 | 1,2,4,8,33, 3,5,6,7,34,<br>35,36,40 37,38,39 | 3 O54728,P01681,Q6AY61                             |
| 1973 | 1,2,4,8,33, 3,5,6,7,34,<br>35,37,38 36,39,40 | 2 B0BNN3,Q68G31                                    |
| 1974 | 1,2,4,8,33, 3,5,6,7,34,<br>35,37,39 36,38,40 | 2 P50116,Q9QWN8                                    |
| 1975 | 1,2,4,8,33, 3,5,6,7,34,<br>35,37,40 36,38,39 | 0                                                  |
| 1976 | 1,2,4,8,33, 3,5,6,7,34,<br>35,38,39 36,37,40 | 2 P70502,Q68G31                                    |
| 1977 | 1,2,4,8,33, 3,5,6,7,34,<br>35,38,40 36,37,39 | 3 P98089,Q62635,Q68G31                             |
| 1978 | 1,2,4,8,33, 3,5,6,7,34,<br>35,39,40 36,37,38 | 1 P47967                                           |
| 1979 | 1,2,4,8,33, 3,5,6,7,34,<br>36,37,38 35,39,40 | 3 O54728,P08723,Q63474                             |
| 1980 | 1,2,4,8,33, 3,5,6,7,34,<br>36,37,39 35,38,40 | 1 O54728                                           |
| 1981 | 1,2,4,8,33, 3,5,6,7,34,<br>36,37,40 35,38,39 | 5 O08815,O54728,P08723,P30120,Q6AYR9               |
| 1982 | 1,2,4,8,33, 3,5,6,7,34,<br>36,38,39 35,37,40 | 1 O54728                                           |

|      |                                             |                                                           |
|------|---------------------------------------------|-----------------------------------------------------------|
| 1983 | 1,2,4,8,33, 35,6,7,34,<br>36,38,40 35,37,39 | 2 O54728,P01681                                           |
| 1984 | 1,2,4,8,33, 35,6,7,34,<br>36,39,40 35,37,38 | 2 O54728,P01681                                           |
| 1985 | 1,2,4,8,33, 35,6,7,34,<br>37,38,39 35,36,40 | 2 Q68G31,Q9QWN8                                           |
| 1986 | 1,2,4,8,33, 35,6,7,34,<br>37,38,40 35,36,39 | 2 P19223,Q68G31                                           |
| 1987 | 1,2,4,8,33, 35,6,7,34,<br>37,39,40 35,36,38 | 3 P21674,Q6AYQ8,Q9QWN8                                    |
| 1988 | 1,2,4,8,33, 35,6,7,34,<br>38,39,40 35,36,37 | 7 D4A5U3,P19132,P47967,P55091,P97840,Q62635,Q8CIZ5        |
| 1989 | 1,2,4,8,34, 35,6,7,33,<br>35,36,37 38,39,40 | 3 P50116,P51740,Q5RKI1                                    |
| 1990 | 1,2,4,8,34, 35,6,7,33,<br>35,36,38 37,39,40 | 3 P97580,Q30KJ2,Q5RKI1                                    |
| 1991 | 1,2,4,8,34, 35,6,7,33,<br>35,36,39 37,38,40 | 6 G3V686,P20762,Q30KJ2,Q62714,Q6AY61,Q9Z1F2               |
| 1992 | 1,2,4,8,34, 35,6,7,33,<br>35,36,40 37,38,39 | 5 P07174,P15399,P97580,Q30KJ2,Q5RKI1                      |
| 1993 | 1,2,4,8,34, 35,6,7,33,<br>35,37,38 36,39,40 | 4 P25809,P97580,Q30KJ2,Q5RKI1                             |
| 1994 | 1,2,4,8,34, 35,6,7,33,<br>35,37,39 36,38,40 | 4 P20762,P25809,P50116,Q30KJ2                             |
| 1995 | 1,2,4,8,34, 35,6,7,33,<br>35,37,40 36,38,39 | 6 P07174,P15399,P50116,P97580,Q30KJ2,Q5RKI1               |
| 1996 | 1,2,4,8,34, 35,6,7,33,<br>35,38,39 36,37,40 | 4 P20762,P25809,P97580,Q30KJ2                             |
| 1997 | 1,2,4,8,34, 35,6,7,33,<br>35,38,40 36,37,39 | 6 P15399,P97580,P98089,Q30KJ2,Q5RKI1,Q62635               |
| 1998 | 1,2,4,8,34, 35,6,7,33,<br>35,39,40 36,37,38 | 6 P00774,P15399,P20762,P47967,P97580,Q30KJ2               |
| 1999 | 1,2,4,8,34, 35,6,7,33,<br>36,37,38 35,39,40 | 4 Q30KJ2,Q4KLZ6,Q5RKI1,Q63474                             |
| 2000 | 1,2,4,8,34, 35,6,7,33,<br>36,37,39 35,38,40 | 0                                                         |
| 2001 | 1,2,4,8,34, 35,6,7,33,<br>36,37,40 35,38,39 | 8 P07174,P13432,P15399,P30120,P97580,Q30KJ2,Q4KLZ6,Q5RKI1 |
| 2002 | 1,2,4,8,34, 35,6,7,33,<br>36,38,39 35,37,40 | 4 G3V686,P20762,P97580,Q30KJ2                             |

|      |                                             |                                                                                            |
|------|---------------------------------------------|--------------------------------------------------------------------------------------------|
| 2003 | 1,2,4,8,34, 35,6,7,33,<br>36,38,40 35,37,39 | 5 P15399,P97580,Q30KJ2,Q4KLZ6,Q5RKI1                                                       |
| 2004 | 1,2,4,8,34, 35,6,7,33,<br>36,39,40 35,37,38 | 3 P15399,P97580,Q30KJ2                                                                     |
| 2005 | 1,2,4,8,34, 35,6,7,33,<br>37,38,39 35,36,40 | 5 D4A5U3,P20762,P97580,Q30KJ2,Q63618                                                       |
| 2006 | 1,2,4,8,34, 35,6,7,33,<br>37,38,40 35,36,39 | 6 P15399,P19223,P97580,Q30KJ2,Q4KLZ6,Q5RKI1                                                |
| 2007 | 1,2,4,8,34, 35,6,7,33,<br>37,39,40 35,36,38 | 4 P13432,P15399,P97580,Q30KJ2                                                              |
| 2008 | 1,2,4,8,34, 35,6,7,33,<br>38,39,40 35,36,37 | 12 D4A5U3,P15399,P20762,P47967,P55091,P97580,P97840,Q10758,Q30KJ2,Q62635,Q63618,Q8CI<br>Z5 |
| 2009 | 1,2,4,8,35, 35,6,7,33,<br>36,37,38 34,39,40 | 1 Q5RKI1                                                                                   |
| 2010 | 1,2,4,8,35, 35,6,7,33,<br>36,37,39 34,38,40 | 2 P50116,Q62714                                                                            |
| 2011 | 1,2,4,8,35, 35,6,7,33,<br>36,37,40 34,38,39 | 6 P02793;Q7TP54,P07174,P19132,P50116,P60905,Q5RKI1                                         |
| 2012 | 1,2,4,8,35, 35,6,7,33,<br>36,38,39 34,37,40 | 2 Q62714,Q6AY61                                                                            |
| 2013 | 1,2,4,8,35, 35,6,7,33,<br>36,38,40 34,37,39 | 4 P02793;Q7TP54,Q5RKI1,Q62635,Q6AY61                                                       |
| 2014 | 1,2,4,8,35, 35,6,7,33,<br>36,39,40 34,37,38 | 3 P54921,Q62714,Q6AY61                                                                     |
| 2015 | 1,2,4,8,35, 35,6,7,33,<br>37,38,39 34,36,40 | 0                                                                                          |
| 2016 | 1,2,4,8,35, 35,6,7,33,<br>37,38,40 34,36,39 | 3 P19223,Q5RKI1,Q62635                                                                     |
| 2017 | 1,2,4,8,35, 35,6,7,33,<br>37,39,40 34,36,38 | 1 P50116                                                                                   |
| 2018 | 1,2,4,8,35, 35,6,7,33,<br>38,39,40 34,36,37 | 11 D4A5U3,P00774,P10758,P26772,P47967,P54921,P55091,P98089,Q5EGZ1,Q62635,Q8CIZ5            |
| 2019 | 1,2,4,8,36, 35,6,7,33,<br>37,38,39 34,35,40 | 1 Q63474                                                                                   |
| 2020 | 1,2,4,8,36, 35,6,7,33,<br>37,38,40 34,35,39 | 4 P06911,Q5GRG2,Q5RKI1,Q63474                                                              |
| 2021 | 1,2,4,8,36, 35,6,7,33,<br>37,39,40 34,35,38 | 5 P19629,P50116,Q5GRG2,Q6AYR9,Q812E4                                                       |
| 2022 | 1,2,4,8,36, 35,6,7,33,<br>38,39,40 34,35,37 | 4 P54921,Q5BJY9,Q62635,Q8CIZ5                                                              |

|      |                                              |                                                                          |
|------|----------------------------------------------|--------------------------------------------------------------------------|
| 2023 | 1,2,4,8,37, 3,5,6,7,33,<br>38,39,40 34,35,36 | 10 D4A5U3,P08721,P19223,P47967,P55091,Q5GRG2,Q5I0D7,Q62635,Q6PCU2,Q8CIZ5 |
| 2024 | 1,2,4,33,3 3,5,6,7,8,3<br>4,35,36,37 8,39,40 | 9 D3ZUC6,P25031,P35280,P50115,P51740,P80020,Q5QE79,Q9EQS0,Q9R168         |
| 2025 | 1,2,4,33,3 3,5,6,7,8,3<br>4,35,36,38 7,39,40 | 4 D3ZUC6,P49134,P80299,Q9R168                                            |
| 2026 | 1,2,4,33,3 3,5,6,7,8,3<br>4,35,36,39 7,38,40 | 7 D3ZUC6,G3V686,P06866,P35280,P49134,Q62714,Q9EQS0                       |
| 2027 | 1,2,4,33,3 3,5,6,7,8,3<br>4,35,36,40 7,38,39 | 5 D3ZUC6,P07174,P35280,Q5QE79,Q9EQS0                                     |
| 2028 | 1,2,4,33,3 3,5,6,7,8,3<br>4,35,37,38 6,39,40 | 5 B0BNN3,D3ZUC6,P80020,P80299,Q9R168                                     |
| 2029 | 1,2,4,33,3 3,5,6,7,8,3<br>4,35,37,39 6,38,40 | 4 D3ZUC6,P35280,P50115,P80020                                            |
| 2030 | 1,2,4,33,3 3,5,6,7,8,3<br>4,35,37,40 6,38,39 | 7 B0BNN3,D3ZUC6,P35280,P50115,P80020,Q9EQS0,Q9R168                       |
| 2031 | 1,2,4,33,3 3,5,6,7,8,3<br>4,35,38,39 6,37,40 | 3 D3ZUC6,P70502,P80299                                                   |
| 2032 | 1,2,4,33,3 3,5,6,7,8,3<br>4,35,38,40 6,37,39 | 6 D3ZUC6,P63029,P80299,P97829,Q9QYP1,Q9R168                              |
| 2033 | 1,2,4,33,3 3,5,6,7,8,3<br>4,35,39,40 6,37,38 | 4 D3ZUC6,P19218,P35280,Q9EQS0                                            |
| 2034 | 1,2,4,33,3 3,5,6,7,8,3<br>4,36,37,38 5,39,40 | 4 D3ZUC6,P80299,Q4KLZ6,Q9R168                                            |
| 2035 | 1,2,4,33,3 3,5,6,7,8,3<br>4,36,37,39 5,38,40 | 4 D3ZUC6,P06866,P35280,P36374                                            |
| 2036 | 1,2,4,33,3 3,5,6,7,8,3<br>4,36,37,40 5,38,39 | 7 D3ZUC6,P07174,P35280,P36374,Q4KLZ6,Q5QE79,Q9EQS0                       |
| 2037 | 1,2,4,33,3 3,5,6,7,8,3<br>4,36,38,39 5,37,40 | 6 D3ZUC6,G3V686,P06866,P19132,P80299,Q99041                              |
| 2038 | 1,2,4,33,3 3,5,6,7,8,3<br>4,36,38,40 5,37,39 | 4 D3ZUC6,P80299,Q4KLZ6,Q9QYP1                                            |
| 2039 | 1,2,4,33,3 3,5,6,7,8,3<br>4,36,39,40 5,37,38 | 4 D3ZUC6,P19218,P35280,Q9EQS0                                            |
| 2040 | 1,2,4,33,3 3,5,6,7,8,3<br>4,37,38,39 5,36,40 | 5 B0BNN3,P17475,P80299,Q6AYQ8,Q9EQV9                                     |
| 2041 | 1,2,4,33,3 3,5,6,7,8,3<br>4,37,38,40 5,36,39 | 7 B0BNN3,P14173,P19223,P80299,Q4KLZ6,Q9QYP1,Q9R168                       |
| 2042 | 1,2,4,33,3 3,5,6,7,8,3<br>4,37,39,40 5,36,38 | 4 O70417,P19218,P35280,Q6AYQ8                                            |

|      |                                              |                                                                  |
|------|----------------------------------------------|------------------------------------------------------------------|
| 2043 | 1,2,4,33,3 3,5,6,7,8,3<br>4,38,39,40 5,36,37 | 9 P01039,P19132,P19218,P47967,P55091,P80299,P97840,Q5I0D1,Q9QYP1 |
| 2044 | 1,2,4,33,3 3,5,6,7,8,3<br>5,36,37,38 4,39,40 | 4 P14173,P49134,Q68G31,Q9R168                                    |
| 2045 | 1,2,4,33,3 3,5,6,7,8,3<br>5,36,37,39 4,38,40 | 4 P25031,P35280,P49134,P50116                                    |
| 2046 | 1,2,4,33,3 3,5,6,7,8,3<br>5,36,37,40 4,38,39 | 5 P07174,P35280,P50115,P60905,Q9EQS0                             |
| 2047 | 1,2,4,33,3 3,5,6,7,8,3<br>5,36,38,39 4,37,40 | 3 P49134,P70502,Q62714                                           |
| 2048 | 1,2,4,33,3 3,5,6,7,8,3<br>5,36,38,40 4,37,39 | 3 P06760,P49134,Q9QYP1                                           |
| 2049 | 1,2,4,33,3 3,5,6,7,8,3<br>5,36,39,40 4,37,38 | 4 P06760,P35280,P49134,Q9EQS0                                    |
| 2050 | 1,2,4,33,3 3,5,6,7,8,3<br>5,37,38,39 4,36,40 | 4 B0BNN3,P19223,P70502,Q68G31                                    |
| 2051 | 1,2,4,33,3 3,5,6,7,8,3<br>5,37,38,40 4,36,39 | 4 B0BNN3,P14173,P19223,Q68G31                                    |
| 2052 | 1,2,4,33,3 3,5,6,7,8,3<br>5,37,39,40 4,36,38 | 4 P35280,P50115,Q68G31,Q9EQS0                                    |
| 2053 | 1,2,4,33,3 3,5,6,7,8,3<br>5,38,39,40 4,36,37 | 8 P06760,P47967,P55091,P70502,P98089,Q62635,Q68G31,Q9QYP1        |
| 2054 | 1,2,4,33,3 3,5,6,7,8,3<br>6,37,38,39 4,35,40 | 2 Q63474,Q68G31                                                  |
| 2055 | 1,2,4,33,3 3,5,6,7,8,3<br>6,37,38,40 4,35,39 | 4 P14173,P36860,Q63474,Q9Z0V6                                    |
| 2056 | 1,2,4,33,3 3,5,6,7,8,3<br>6,37,39,40 4,35,38 | 2 P35280,P36374                                                  |
| 2057 | 1,2,4,33,3 3,5,6,7,8,3<br>6,38,39,40 4,35,37 | 3 P06760,P36860,P55091                                           |
| 2058 | 1,2,4,33,3 3,5,6,7,8,3<br>7,38,39,40 4,35,36 | 5 P17475,P19223,P47967,P55091,Q68G31                             |
| 2059 | 1,2,4,34,3 3,5,6,7,8,3<br>5,36,37,38 3,39,40 | 5 P14173,P25031,Q4KLZ6,Q5RKI1,Q9R168                             |
| 2060 | 1,2,4,34,3 3,5,6,7,8,3<br>5,36,37,39 3,38,40 | 6 P06866,P25031,P35280,P50115,P50116,Q62714                      |
| 2061 | 1,2,4,34,3 3,5,6,7,8,3<br>5,36,37,40 3,38,39 | 7 P07174,P35280,P50115,P50116,Q4KLZ6,Q5RKI1,Q9EQS0               |
| 2062 | 1,2,4,34,3 3,5,6,7,8,3<br>5,36,38,39 3,37,40 | 2 P50137,Q62714                                                  |

|      |                          |                           |            |                                                                                                   |
|------|--------------------------|---------------------------|------------|---------------------------------------------------------------------------------------------------|
| 2063 | 1,2,4,34,3<br>5,36,38,40 | 3,5,6,7,8,3<br>3,37,39    | 2          | Q4KLZ6,Q5RKI1                                                                                     |
| 2064 | 1,2,4,34,3<br>5,36,39,40 | 3,5,6,7,8,3<br>3,37,38    | 4          | P35280,P50115,P50137,Q9EQS0                                                                       |
| 2065 | 1,2,4,34,3<br>5,37,38,39 | 3,5,6,7,8,3<br>3,36,40    | 0          |                                                                                                   |
| 2066 | 1,2,4,34,3<br>5,37,38,40 | 3,5,6,7,8,3<br>3,36,39    | 5          | B0BNN3,P14173,P19223,Q4KLZ6,Q5RKI1                                                                |
| 2067 | 1,2,4,34,3<br>5,37,39,40 | 3,5,6,7,8,3<br>3,36,38    | 4          | O70417,P35280,P50115,P50116                                                                       |
| 2068 | 1,2,4,34,3<br>5,38,39,40 | 3,5,6,7,8,3<br>3,36,37    | 8          | P00774,P10758,P15399,P47967,P55091,P97580,P98089,Q62635                                           |
| 2069 | 1,2,4,34,3<br>6,37,38,39 | 3,5,6,7,8,3<br>3,35,40    | 2          | P06866,Q4KLZ6                                                                                     |
| 2070 | 1,2,4,34,3<br>6,37,38,40 | 3,5,6,7,8,3<br>3,35,39    | 4          | P14173,Q4KLZ6,Q5RKI1,Q63474                                                                       |
| 2071 | 1,2,4,34,3<br>6,37,39,40 | 3,5,6,7,8,3<br>3,35,38    | 3          | O70417,P35280,P50115                                                                              |
| 2072 | 1,2,4,34,3<br>6,38,39,40 | 3,5,6,7,8,3<br>3,35,37    | 1          | Q4KLZ6                                                                                            |
| 2073 | 1,2,4,34,3<br>7,38,39,40 | 3,5,6,7,8,3<br>3,35,36    | 2          | P19223,Q4KLZ6                                                                                     |
| 2074 | 1,2,4,35,3<br>6,37,38,39 | 3,5,6,7,8,3<br>3,34,40    | 1          | P14173                                                                                            |
| 2075 | 1,2,4,35,3<br>6,37,38,40 | 3,5,6,7,8,3<br>3,34,39    | 4          | P02793;Q7TP54,P14173,Q5RKI1,Q9QX74                                                                |
| 2076 | 1,2,4,35,3<br>6,37,39,40 | 3,5,6,7,8,3<br>3,34,38    | 4          | P35280,P50115,P50116,Q9EQS0                                                                       |
| 2077 | 1,2,4,35,3<br>6,38,39,40 | 3,5,6,7,8,3<br>3,34,37    | 5          | P06760,P55091,P98089,Q62635,Q9QX74                                                                |
| 2078 | 1,2,4,35,3<br>7,38,39,40 | 3,5,6,7,8,3<br>3,34,36    | 10         | P08649,P14173,P19223,P26772,P47967,P55091,P98089,Q5I0D7,Q62635,Q9QX74                             |
| 2079 | 1,2,4,36,3<br>7,38,39,40 | 3,5,6,7,8,3<br>3,34,35    | 5          | P14173,P19629,Q5I0D7,Q63474,Q9QX74                                                                |
| 2080 | 1,2,5,6,7,8<br>,33,34    | 3,4,35,36,<br>37,38,39,40 | iRT-<br>13 | Kit_WR_fusion,O54858,O89117,P02631,P08721,P16636,P52590,P80202,Q63751,Q6IG05,Q91XN4,Q99MH3,Q9QW30 |
| 2081 | 1,2,5,6,7,8<br>,33,35    | 3,4,34,36,<br>37,38,39,40 | 4          | O54858,P29315,P52590,Q09030                                                                       |



|      |                       |                               |                                                                                     |
|------|-----------------------|-------------------------------|-------------------------------------------------------------------------------------|
| 2082 | 1,2,5,6,7,8<br>,33,36 | 3,4,34,35,<br>37,38,39,4<br>0 | 10 D3ZTX0,O54858,P08721,P16636,P52590,Q09030,Q63751,Q91XN4,Q99MH3,Q9QZQ5            |
| 2083 | 1,2,5,6,7,8<br>,33,37 | 3,4,34,35,<br>36,38,39,4<br>0 | 7 D3ZTX0,O54858,P00762,P16636,P52590,Q63751,Q9JJ50                                  |
| 2084 | 1,2,5,6,7,8<br>,33,38 | 3,4,34,35,<br>36,37,39,4<br>0 | 7 iRT-Kit_WR_fusion,O54858,P50115,P50116,P52590,Q6IG05,Q91XN4                       |
| 2085 | 1,2,5,6,7,8<br>,33,39 | 3,4,34,35,<br>36,37,38,4<br>0 | 5 D3ZTX0,O54858,P00762,P16636,P29315                                                |
| 2086 | 1,2,5,6,7,8<br>,33,40 | 3,4,34,35,<br>36,37,38,3<br>9 | 7 O54858,P02631,P25031,P29315,P52590,P80202,Q91XN4                                  |
| 2087 | 1,2,5,6,7,8<br>,34,35 | 3,4,33,36,<br>37,38,39,4<br>0 | 5 iRT-Kit_WR_fusion,O54858,P36374,P48199,Q9Z1F2                                     |
| 2088 | 1,2,5,6,7,8<br>,34,36 | 3,4,33,35,<br>37,38,39,4<br>0 | 10 B0BNN3,iRT-Kit_WR_fusion,O54858,P48199,P52590,Q63751,Q91XN4,Q91ZS3,Q9JJ50,Q9Z1F2 |
| 2089 | 1,2,5,6,7,8<br>,34,37 | 3,4,33,35,<br>36,38,39,4<br>0 | 6 O54858,P01835,P06760,P52590,Q66H69,Q9JJ50                                         |
| 2090 | 1,2,5,6,7,8<br>,34,38 | 3,4,33,35,<br>36,37,39,4<br>0 | 5 iRT-Kit_WR_fusion,O54858,P36374,P50116,Q6IG05                                     |
| 2091 | 1,2,5,6,7,8<br>,34,39 | 3,4,33,35,<br>36,37,38,4<br>0 | 4 O54858,P20762,Q9Z0V6,Q9Z1F2                                                       |
| 2092 | 1,2,5,6,7,8<br>,34,40 | 3,4,33,35,<br>36,37,38,3<br>9 | 7 O54858,P15399,P52590,P97580,Q30KJ2,Q91XN4,Q9JJ50                                  |
| 2093 | 1,2,5,6,7,8<br>,35,36 | 3,4,33,34,<br>37,38,39,4<br>0 | 8 B0BNN3,O54858,P00762,P19218,P19814,P48199,P52590,Q9Z1F2                           |
| 2094 | 1,2,5,6,7,8<br>,35,37 | 3,4,33,34,<br>36,38,39,4<br>0 | 6 F1M3L7,O54858,P00762,P19218,P19814,Q64093                                         |

|      |                        |                               |                                                                          |
|------|------------------------|-------------------------------|--------------------------------------------------------------------------|
| 2095 | 1,2,5,6,7,8<br>,35,38  | 3,4,33,34,<br>36,37,39,4<br>0 | 7 O54858,P00762,P19218,P19814,P36374,Q6IG05,Q9Z0J6                       |
| 2096 | 1,2,5,6,7,8<br>,35,39  | 3,4,33,34,<br>36,37,38,4<br>0 | 7 O54858,P00762,P19814,P29315,P36374,Q9Z0J6,Q9Z1F2                       |
| 2097 | 1,2,5,6,7,8<br>,35,40  | 3,4,33,34,<br>36,37,38,3<br>9 | 6 O54858,P00762,P19814,P29315,P36374,P52590                              |
| 2098 | 1,2,5,6,7,8<br>,36,37  | 3,4,33,34,<br>35,38,39,4<br>0 | 5 P00762,P01835,P19218,P52590,Q9JJ50                                     |
| 2099 | 1,2,5,6,7,8<br>,36,38  | 3,4,33,34,<br>35,37,39,4<br>0 | 8 O54858,P00762,P19218,P19814,P50115,P50116,P52590,Q6IG05                |
| 2100 | 1,2,5,6,7,8<br>,36,39  | 3,4,33,34,<br>35,37,38,4<br>0 | 5 B0BNN3,O54858,P00762,P52590,Q9Z1F2                                     |
| 2101 | 1,2,5,6,7,8<br>,36,40  | 3,4,33,34,<br>35,37,38,3<br>9 | 6 B0BNN3,O54858,P00762,P52590,Q91XN4,Q9JJ50                              |
| 2102 | 1,2,5,6,7,8<br>,37,38  | 3,4,33,34,<br>35,36,39,4<br>0 | 7 P00762,P01835,P19218,P19814,Q6IG05,Q9JJ50,Q9Z0J6                       |
| 2103 | 1,2,5,6,7,8<br>,37,39  | 3,4,33,34,<br>35,36,38,4<br>0 | 3 P00762,P01835,Q9Z0J6                                                   |
| 2104 | 1,2,5,6,7,8<br>,37,40  | 3,4,33,34,<br>35,36,38,3<br>9 | 9 O54858,P00762,P01835,P52590,P82471,Q5GRG2,Q62714,Q9JJ50,Q9QW07         |
| 2105 | 1,2,5,6,7,8<br>,38,39  | 3,4,33,34,<br>35,36,37,4<br>0 | 8 O54858,P00762,P19814,P36374,P50115,P50116,Q6PCU2,Q9Z0J6                |
| 2106 | 1,2,5,6,7,8<br>,38,40  | 3,4,33,34,<br>35,36,37,3<br>9 | 10 O54858,P00762,P01835,P19814,P25031,P36374,P50116,P52590,Q6IG05,Q6PCU2 |
| 2107 | 1,2,5,6,7,8<br>,39,40  | 3,4,33,34,<br>35,36,37,3<br>8 | 5 B0BNN3,O54858,P00762,P25031,P29315                                     |
| 2108 | 1,2,5,6,7,3<br>3,34,35 | 3,4,8,36,3<br>7,38,39,40      | 7 D3ZUC6,O89117,P08721,P52590,Q5I0D7,Q9EQS0,Q9R168                       |

|      |                        |                          |    |                                                                       |
|------|------------------------|--------------------------|----|-----------------------------------------------------------------------|
| 2109 | 1,2,5,6,7,3<br>3,34,36 | 3,4,8,35,3<br>7,38,39,40 | 10 | P00774,P08494,P08721,P16636,P52590,P98089,Q5I0D7,Q63751,Q99MH3,Q9JJ50 |
| 2110 | 1,2,5,6,7,3<br>3,34,37 | 3,4,8,35,3<br>6,38,39,40 | 8  | D3ZTX0,P00774,P01835,P52590,P98089,Q63751,Q6AY61,Q9JJ50               |
| 2111 | 1,2,5,6,7,3<br>3,34,38 | 3,4,8,35,3<br>6,37,39,40 | 7  | P08721,P50116,P52590,P80299,P97829,Q6AY61,Q9R168                      |
| 2112 | 1,2,5,6,7,3<br>3,34,39 | 3,4,8,35,3<br>6,37,38,40 | 3  | D3ZTX0,Q6AY61,Q99MH3                                                  |
| 2113 | 1,2,5,6,7,3<br>3,34,40 | 3,4,8,35,3<br>6,37,38,39 | 5  | P01039,P52590,Q62714,Q6AY61,Q9EQS0                                    |
| 2114 | 1,2,5,6,7,3<br>3,35,36 | 3,4,8,34,3<br>7,38,39,40 | 6  | D4A5U3,P00762,P08721,P52590,Q923V8,Q9EQS0                             |
| 2115 | 1,2,5,6,7,3<br>3,35,37 | 3,4,8,34,3<br>6,38,39,40 | 5  | D3ZTX0,P00762,P52590,Q5BJY9,Q8CIZ5                                    |
| 2116 | 1,2,5,6,7,3<br>3,35,38 | 3,4,8,34,3<br>6,37,39,40 | 3  | P00762,P50116,Q923V8                                                  |
| 2117 | 1,2,5,6,7,3<br>3,35,39 | 3,4,8,34,3<br>6,37,38,40 | 2  | P00762,P29315                                                         |
| 2118 | 1,2,5,6,7,3<br>3,35,40 | 3,4,8,34,3<br>6,37,38,39 | 6  | P00762,P01039,P05539,P29315,P52590,Q9EQS0                             |
| 2119 | 1,2,5,6,7,3<br>3,36,37 | 3,4,8,34,3<br>5,38,39,40 | 9  | D3ZTX0,P00762,P00774,P16636,P52590,P98089,Q63751,Q8CIZ5,Q9JJ50        |
| 2120 | 1,2,5,6,7,3<br>3,36,38 | 3,4,8,34,3<br>5,37,39,40 | 7  | P00762,P08721,P36860,P50116,P52590,Q03191,Q923V8                      |
| 2121 | 1,2,5,6,7,3<br>3,36,39 | 3,4,8,34,3<br>5,37,38,40 | 7  | D3ZTX0,P00762,P16636,P36860,P52590,Q923V8,Q99MH3                      |
| 2122 | 1,2,5,6,7,3<br>3,36,40 | 3,4,8,34,3<br>5,37,38,39 | 6  | P00762,P16636,P36860,P52590,Q923V8,Q9EQS0                             |
| 2123 | 1,2,5,6,7,3<br>3,37,38 | 3,4,8,34,3<br>5,36,39,40 | 6  | P00762,P01835,P14173,P50116,Q62714,Q6AY61                             |
| 2124 | 1,2,5,6,7,3<br>3,37,39 | 3,4,8,34,3<br>5,36,38,40 | 6  | D3ZTX0,O70417,P00762,P01835,Q6AY61,Q9QZ76                             |
| 2125 | 1,2,5,6,7,3<br>3,37,40 | 3,4,8,34,3<br>5,36,38,39 | 6  | D3ZTX0,P00762,P01835,P52590,Q62714,Q6AY61                             |
| 2126 | 1,2,5,6,7,3<br>3,38,39 | 3,4,8,34,3<br>5,36,37,40 | 4  | P00762,P50116,Q63556,Q923V8                                           |
| 2127 | 1,2,5,6,7,3<br>3,38,40 | 3,4,8,34,3<br>5,36,37,39 | 8  | P00762,P01039,P36860,P50116,P52590,Q62714,Q6AY61,Q923V8               |
| 2128 | 1,2,5,6,7,3<br>3,39,40 | 3,4,8,34,3<br>5,36,37,38 | 4  | P00762,P01039,P29315,P52590                                           |

|      |                        |                          |   |                                                                |
|------|------------------------|--------------------------|---|----------------------------------------------------------------|
| 2129 | 1,2,5,6,7,3<br>4,35,36 | 3,4,8,33,3<br>7,38,39,40 | 5 | P48199,P52590,Q9EQS0,Q9QWN8,Q9Z1F2                             |
| 2130 | 1,2,5,6,7,3<br>4,35,37 | 3,4,8,33,3<br>6,38,39,40 | 2 | P00762,P01835                                                  |
| 2131 | 1,2,5,6,7,3<br>4,35,38 | 3,4,8,33,3<br>6,37,39,40 | 2 | P50116,Q9QWN8                                                  |
| 2132 | 1,2,5,6,7,3<br>4,35,39 | 3,4,8,33,3<br>6,37,38,40 | 1 | Q9Z1F2                                                         |
| 2133 | 1,2,5,6,7,3<br>4,35,40 | 3,4,8,33,3<br>6,37,38,39 | 2 | P52590,Q9EQS0                                                  |
| 2134 | 1,2,5,6,7,3<br>4,36,37 | 3,4,8,33,3<br>5,38,39,40 | 8 | O70417,P00762,P00774,P01835,P47967,P52590,P98089,Q9JJ50        |
| 2135 | 1,2,5,6,7,3<br>4,36,38 | 3,4,8,33,3<br>5,37,39,40 | 4 | P01835,P50116,P52590,Q9QWN8                                    |
| 2136 | 1,2,5,6,7,3<br>4,36,39 | 3,4,8,33,3<br>5,37,38,40 | 3 | B0BNN3,P01835,Q9Z1F2                                           |
| 2137 | 1,2,5,6,7,3<br>4,36,40 | 3,4,8,33,3<br>5,37,38,39 | 5 | B0BNN3,P01835,P52590,Q9EQS0,Q9JJ50                             |
| 2138 | 1,2,5,6,7,3<br>4,37,38 | 3,4,8,33,3<br>5,36,39,40 | 6 | P01681,P01835,P14173,P50116,Q6AY61,Q9JJ50                      |
| 2139 | 1,2,5,6,7,3<br>4,37,39 | 3,4,8,33,3<br>5,36,38,40 | 4 | O70417,P00762,P01835,Q6AY61                                    |
| 2140 | 1,2,5,6,7,3<br>4,37,40 | 3,4,8,33,3<br>5,36,38,39 | 8 | O70417,P00762,P01835,P20767,P52590,Q62714,Q6AY61,Q9JJ50        |
| 2141 | 1,2,5,6,7,3<br>4,38,39 | 3,4,8,33,3<br>5,36,37,40 | 4 | P01835,P50116,P60905,Q6AY61                                    |
| 2142 | 1,2,5,6,7,3<br>4,38,40 | 3,4,8,33,3<br>5,36,37,39 | 5 | P01835,P50116,P52590,Q62714,Q6AY61                             |
| 2143 | 1,2,5,6,7,3<br>4,39,40 | 3,4,8,33,3<br>5,36,37,38 | 4 | O70417,P00762,P01835,Q6AY61                                    |
| 2144 | 1,2,5,6,7,3<br>5,36,37 | 3,4,8,33,3<br>4,38,39,40 | 9 | F1M3L7,P00762,P01835,P19132,P19218,P19814,P52590,Q9EQS0,Q9JJS8 |
| 2145 | 1,2,5,6,7,3<br>5,36,38 | 3,4,8,33,3<br>4,37,39,40 | 5 | P00762,P19218,P19814,Q923V8,Q9QWN8                             |
| 2146 | 1,2,5,6,7,3<br>5,36,39 | 3,4,8,33,3<br>4,37,38,40 | 5 | B0BNN3,P00762,P19814,Q9EQS0,Q9Z1F2                             |
| 2147 | 1,2,5,6,7,3<br>5,36,40 | 3,4,8,33,3<br>4,37,38,39 | 7 | B0BNN3,P00762,P02793,Q7TP54,P19814,P52590,Q9EQS0,Q9QWN8        |
| 2148 | 1,2,5,6,7,3<br>5,37,38 | 3,4,8,33,3<br>4,36,39,40 | 6 | P00762,P01835,P14173,P19218,P19814,Q5I0J9                      |

|      |                        |                          |    |                                                                                    |
|------|------------------------|--------------------------|----|------------------------------------------------------------------------------------|
| 2149 | 1,2,5,6,7,3<br>5,37,39 | 3,4,8,33,3<br>4,36,38,40 | 5  | O70417,P00762,P01835,P02625,P19814                                                 |
| 2150 | 1,2,5,6,7,3<br>5,37,40 | 3,4,8,33,3<br>4,36,38,39 | 8  | P00762,P01835,P02625,P19132,P19814,P52590,Q64093,Q9EQS0                            |
| 2151 | 1,2,5,6,7,3<br>5,38,39 | 3,4,8,33,3<br>4,36,37,40 | 2  | P00762,P19814                                                                      |
| 2152 | 1,2,5,6,7,3<br>5,38,40 | 3,4,8,33,3<br>4,36,37,39 | 5  | P00762,P19814,P50116,Q62812,Q6P6R2                                                 |
| 2153 | 1,2,5,6,7,3<br>5,39,40 | 3,4,8,33,3<br>4,36,37,38 | 5  | P00762,P02625,P19814,P29315,Q9EQS0                                                 |
| 2154 | 1,2,5,6,7,3<br>6,37,38 | 3,4,8,33,3<br>4,35,39,40 | 7  | P00762,P01835,P14173,P19218,P19814,P52590,Q9JJ50                                   |
| 2155 | 1,2,5,6,7,3<br>6,37,39 | 3,4,8,33,3<br>4,35,38,40 | 3  | O70417,P00762,P01835                                                               |
| 2156 | 1,2,5,6,7,3<br>6,37,40 | 3,4,8,33,3<br>4,35,38,39 | 6  | O70417,P00762,P01835,P52590,Q9EQS0,Q9JJ50                                          |
| 2157 | 1,2,5,6,7,3<br>6,38,39 | 3,4,8,33,3<br>4,35,37,40 | 6  | P00762,P01835,P19814,P36860,P50116,Q923V8                                          |
| 2158 | 1,2,5,6,7,3<br>6,38,40 | 3,4,8,33,3<br>4,35,37,39 | 8  | P00762,P01835,P19814,P36860,P50116,P52590,Q923V8,Q9QWN8                            |
| 2159 | 1,2,5,6,7,3<br>6,39,40 | 3,4,8,33,3<br>4,35,37,38 | 5  | B0BNN3,P00762,P01835,P52590,Q9EQS0                                                 |
| 2160 | 1,2,5,6,7,3<br>7,38,39 | 3,4,8,33,3<br>4,35,36,40 | 6  | P00762,P01835,P14173,P19814,Q6AY61,Q9Z0J6                                          |
| 2161 | 1,2,5,6,7,3<br>7,38,40 | 3,4,8,33,3<br>4,35,36,39 | 9  | P00762,P01835,P14173,P19814,P20767,P52590,Q62714,Q6AY61,Q9QX74                     |
| 2162 | 1,2,5,6,7,3<br>7,39,40 | 3,4,8,33,3<br>4,35,36,38 | 5  | O70417,P00762,P01835,P02625,Q6AY61                                                 |
| 2163 | 1,2,5,6,7,3<br>8,39,40 | 3,4,8,33,3<br>4,35,36,37 | 10 | P00762,P01835,P19814,P26772,P50116,P51740,P55091,Q6AY61,Q6P6R2,Q6PCU2              |
| 2164 | 1,2,5,6,8,3<br>3,34,35 | 3,4,7,36,3<br>7,38,39,40 | 5  | D3ZUC6,O54858,O89117,P52590,Q99MH3                                                 |
| 2165 | 1,2,5,6,8,3<br>3,34,36 | 3,4,7,35,3<br>7,38,39,40 | 12 | O54858,O89117,P08494,P08649,P16636,P52590,Q5QE79,Q63751,Q91XN4,Q91ZS3,Q99MH3,Q9ZQ5 |
| 2166 | 1,2,5,6,8,3<br>3,34,37 | 3,4,7,35,3<br>6,38,39,40 | 7  | D3ZTX0,O89117,P52590,Q63751,Q6IG05,Q99MH3,Q9JJ50                                   |
| 2167 | 1,2,5,6,8,3<br>3,34,38 | 3,4,7,35,3<br>6,37,39,40 | 3  | O54858,O89117,Q6IG05                                                               |
| 2168 | 1,2,5,6,8,3<br>3,34,39 | 3,4,7,35,3<br>6,37,38,40 | 3  | O54858,P02793,Q7TP54,Q99MH3                                                        |

|      |                        |                          |   |                                                         |
|------|------------------------|--------------------------|---|---------------------------------------------------------|
| 2169 | 1,2,5,6,8,3<br>3,34,40 | 3,4,7,35,3<br>6,37,38,39 | 8 | O54858,P15399,P25031,P52590,P97580,Q30KJ2,Q91XN4,Q99MH3 |
| 2170 | 1,2,5,6,8,3<br>3,35,36 | 3,4,7,34,3<br>7,38,39,40 | 5 | O89117,P52590,Q09030,Q64093,Q99MH3                      |
| 2171 | 1,2,5,6,8,3<br>3,35,37 | 3,4,7,34,3<br>6,38,39,40 | 4 | D3ZTX0,F1M3L7,P52590,Q64093                             |
| 2172 | 1,2,5,6,8,3<br>3,35,38 | 3,4,7,34,3<br>6,37,39,40 | 3 | Q5I0J9,Q68G31,Q6IG05                                    |
| 2173 | 1,2,5,6,8,3<br>3,35,39 | 3,4,7,34,3<br>6,37,38,40 | 2 | P29315,Q99MH3                                           |
| 2174 | 1,2,5,6,8,3<br>3,35,40 | 3,4,7,34,3<br>6,37,38,39 | 4 | P25031,P29315,P52590,Q64093                             |
| 2175 | 1,2,5,6,8,3<br>3,36,37 | 3,4,7,34,3<br>5,38,39,40 | 6 | D3ZTX0,F1M3L7,P16636,P52590,Q63751,Q9JJ50               |
| 2176 | 1,2,5,6,8,3<br>3,36,38 | 3,4,7,34,3<br>5,37,39,40 | 3 | P52590,Q6IG05,Q923V8                                    |
| 2177 | 1,2,5,6,8,3<br>3,36,39 | 3,4,7,34,3<br>5,37,38,40 | 4 | P00714,P16636,P52590,Q99MH3                             |
| 2178 | 1,2,5,6,8,3<br>3,36,40 | 3,4,7,34,3<br>5,37,38,39 | 3 | P25031,P52590,Q63751                                    |
| 2179 | 1,2,5,6,8,3<br>3,37,38 | 3,4,7,34,3<br>5,36,39,40 | 2 | Q68G31,Q6IG05                                           |
| 2180 | 1,2,5,6,8,3<br>3,37,39 | 3,4,7,34,3<br>5,36,38,40 | 1 | D3ZTX0                                                  |
| 2181 | 1,2,5,6,8,3<br>3,37,40 | 3,4,7,34,3<br>5,36,38,39 | 3 | P25031,P52590,Q62714                                    |
| 2182 | 1,2,5,6,8,3<br>3,38,39 | 3,4,7,34,3<br>5,36,37,40 | 2 | P19132,Q6IG05                                           |
| 2183 | 1,2,5,6,8,3<br>3,38,40 | 3,4,7,34,3<br>5,36,37,39 | 4 | P01039,P25031,P52590,Q6IG05                             |
| 2184 | 1,2,5,6,8,3<br>3,39,40 | 3,4,7,34,3<br>5,36,37,38 | 5 | P01039,P25031,P29315,P52590,P97840                      |
| 2185 | 1,2,5,6,8,3<br>4,35,36 | 3,4,7,33,3<br>7,38,39,40 | 4 | P48199,P52590,Q5RKI1,Q9Z1F2                             |
| 2186 | 1,2,5,6,8,3<br>4,35,37 | 3,4,7,33,3<br>6,38,39,40 | 3 | F1M3L7,Q5RKI1,Q64093                                    |
| 2187 | 1,2,5,6,8,3<br>4,35,38 | 3,4,7,33,3<br>6,37,39,40 | 5 | P97580,Q30KJ2,Q5I0J9,Q5RKI1,Q6IG05                      |
| 2188 | 1,2,5,6,8,3<br>4,35,39 | 3,4,7,33,3<br>6,37,38,40 | 2 | Q30KJ2,Q9Z1F2                                           |

|      |                        |                          |   |                                                         |
|------|------------------------|--------------------------|---|---------------------------------------------------------|
| 2189 | 1,2,5,6,8,3<br>4,35,40 | 3,4,7,33,3<br>6,37,38,39 | 6 | P15399,P52590,P97580,Q30KJ2,Q5RKI1,Q64093               |
| 2190 | 1,2,5,6,8,3<br>4,36,37 | 3,4,7,33,3<br>5,38,39,40 | 4 | P52590,Q5RKI1,Q9JJ85,Q9JJ50                             |
| 2191 | 1,2,5,6,8,3<br>4,36,38 | 3,4,7,33,3<br>5,37,39,40 | 4 | P52590,Q5RKI1,Q6IG05,Q91ZS3                             |
| 2192 | 1,2,5,6,8,3<br>4,36,39 | 3,4,7,33,3<br>5,37,38,40 | 4 | B0BNN3,P00714,Q99MH3,Q9Z1F2                             |
| 2193 | 1,2,5,6,8,3<br>4,36,40 | 3,4,7,33,3<br>5,37,38,39 | 6 | B0BNN3,P15399,P52590,P97580,Q5RKI1,Q9JJ50               |
| 2194 | 1,2,5,6,8,3<br>4,37,38 | 3,4,7,33,3<br>5,36,39,40 | 3 | Q5RKI1,Q6IG05,Q9JJ50                                    |
| 2195 | 1,2,5,6,8,3<br>4,37,39 | 3,4,7,33,3<br>5,36,38,40 | 0 |                                                         |
| 2196 | 1,2,5,6,8,3<br>4,37,40 | 3,4,7,33,3<br>5,36,38,39 | 6 | P13432,P15399,P52590,P97580,Q5RKI1,Q9JJ50               |
| 2197 | 1,2,5,6,8,3<br>4,38,39 | 3,4,7,33,3<br>5,36,37,40 | 4 | P19132,P97580,Q30KJ2,Q6IG05                             |
| 2198 | 1,2,5,6,8,3<br>4,38,40 | 3,4,7,33,3<br>5,36,37,39 | 6 | P15399,P25031,P97580,Q30KJ2,Q5RKI1,Q6IG05               |
| 2199 | 1,2,5,6,8,3<br>4,39,40 | 3,4,7,33,3<br>5,36,37,38 | 5 | P15399,P25031,P97580,P97840,Q30KJ2                      |
| 2200 | 1,2,5,6,8,3<br>5,36,37 | 3,4,7,33,3<br>4,38,39,40 | 8 | F1M3L7,P00762,P19218,P19814,P46720,P52590,Q5RKI1,Q64093 |
| 2201 | 1,2,5,6,8,3<br>5,36,38 | 3,4,7,33,3<br>4,37,39,40 | 4 | P19218,P19814,Q5I0J9,Q5RKI1                             |
| 2202 | 1,2,5,6,8,3<br>5,36,39 | 3,4,7,33,3<br>4,37,38,40 | 3 | B0BNN3,P23739,Q9Z1F2                                    |
| 2203 | 1,2,5,6,8,3<br>5,36,40 | 3,4,7,33,3<br>4,37,38,39 | 6 | B0BNN3,P19814,P52590,P82471,Q5RKI1,Q64093               |
| 2204 | 1,2,5,6,8,3<br>5,37,38 | 3,4,7,33,3<br>4,36,39,40 | 7 | F1M3L7,P19218,P19814,Q5I0J9,Q5RKI1,Q64093,Q6IG05        |
| 2205 | 1,2,5,6,8,3<br>5,37,39 | 3,4,7,33,3<br>4,36,38,40 | 2 | F1M3L7,P00762                                           |
| 2206 | 1,2,5,6,8,3<br>5,37,40 | 3,4,7,33,3<br>4,36,38,39 | 7 | F1M3L7,P00762,P19814,P52590,P82471,Q5RKI1,Q64093        |
| 2207 | 1,2,5,6,8,3<br>5,38,39 | 3,4,7,33,3<br>4,36,37,40 | 2 | P19814,Q5EGZ1                                           |
| 2208 | 1,2,5,6,8,3<br>5,38,40 | 3,4,7,33,3<br>4,36,37,39 | 7 | P19814,P25031,Q5EGZ1,Q5I0J9,Q5RKI1,Q62635,Q64093        |

|      |                         |                          |    |                                                                                            |
|------|-------------------------|--------------------------|----|--------------------------------------------------------------------------------------------|
| 2209 | 1,2,5,6,8,3<br>5,39,40  | 3,4,7,33,3<br>4,36,37,38 | 5  | P00762,P29315,P54921,P82471,Q5EGZ1                                                         |
| 2210 | 1,2,5,6,8,3<br>6,37,38  | 3,4,7,33,3<br>4,35,39,40 | 6  | F1M3L7,P19218,P19814,P52590,Q5RKI1,Q6IG05                                                  |
| 2211 | 1,2,5,6,8,3<br>6,37,39  | 3,4,7,33,3<br>4,35,38,40 | 1  | P00762                                                                                     |
| 2212 | 1,2,5,6,8,3<br>6,37,40  | 3,4,7,33,3<br>4,35,38,39 | 7  | F1M3L7,P00762,P52590,P82471,Q5GRG2,Q5RKI1,Q9JJ50                                           |
| 2213 | 1,2,5,6,8,3<br>6,38,39  | 3,4,7,33,3<br>4,35,37,40 | 1  | P19814                                                                                     |
| 2214 | 1,2,5,6,8,3<br>6,38,40  | 3,4,7,33,3<br>4,35,37,39 | 4  | P19814,P25031,P52590,Q5RKI1                                                                |
| 2215 | 1,2,5,6,8,3<br>6,39,40  | 3,4,7,33,3<br>4,35,37,38 | 6  | B0BNN3,P00762,P52590,P54921,P82471,Q64119                                                  |
| 2216 | 1,2,5,6,8,3<br>7,38,39  | 3,4,7,33,3<br>4,35,36,40 | 3  | P00762,P19814,Q6PCU2                                                                       |
| 2217 | 1,2,5,6,8,3<br>7,38,40  | 3,4,7,33,3<br>4,35,36,39 | 9  | P00762,P01835,P19814,P25031,P82471,Q5GRG2,Q5RKI1,Q62714,Q6IG05                             |
| 2218 | 1,2,5,6,8,3<br>7,39,40  | 3,4,7,33,3<br>4,35,36,38 | 2  | P00762,P82471                                                                              |
| 2219 | 1,2,5,6,8,3<br>8,39,40  | 3,4,7,33,3<br>4,35,36,37 | 8  | P19814,P25031,P51740,P54921,P55091,P97840,Q62635,Q6PCU2                                    |
| 2220 | 1,2,5,6,33,<br>34,35,36 | 3,4,7,8,37,<br>38,39,40  | 12 | D3ZUC6,D4A5U3,O89117,P08494,P08721,P11883,P35280,P52590,Q5I0D7,Q5QE79,Q99MH3,Q9EQS0        |
| 2221 | 1,2,5,6,33,<br>34,35,37 | 3,4,7,8,36,<br>38,39,40  | 5  | D3ZUC6,O70417,O89117,P35280,Q9EQS0                                                         |
| 2222 | 1,2,5,6,33,<br>34,35,38 | 3,4,7,8,36,<br>37,39,40  | 4  | D3ZUC6,O89117,P97829,Q5I0J9                                                                |
| 2223 | 1,2,5,6,33,<br>34,35,39 | 3,4,7,8,36,<br>37,38,40  | 5  | D3ZUC6,O70417,P35280,Q99MH3,Q9EQS0                                                         |
| 2224 | 1,2,5,6,33,<br>34,35,40 | 3,4,7,8,36,<br>37,38,39  | 5  | D3ZUC6,P01039,P35280,P52590,Q9EQS0                                                         |
| 2225 | 1,2,5,6,33,<br>34,36,37 | 3,4,7,8,35,<br>38,39,40  | 13 | D3ZTX0,O70417,P00774,P11883,P35280,P52590,P98089,Q05695,Q5QE79,Q62635,Q63751,Q99MH3,Q9JJ50 |
| 2226 | 1,2,5,6,33,<br>34,36,38 | 3,4,7,8,35,<br>37,39,40  | 5  | D3ZUC6,P36860,P52590,Q923V8,Q99MH3                                                         |
| 2227 | 1,2,5,6,33,<br>34,36,39 | 3,4,7,8,35,<br>37,38,40  | 9  | O70417,P00714,P04355,P08494,P35280,P36860,P52590,Q99041,Q99MH3                             |
| 2228 | 1,2,5,6,33,<br>34,36,40 | 3,4,7,8,35,<br>37,38,39  | 8  | P08494,P11883,P35280,P36860,P52590,Q5QE79,Q99MH3,Q9EQS0                                    |



|      |                                              |                                                                                                   |
|------|----------------------------------------------|---------------------------------------------------------------------------------------------------|
| 2229 | 1,2,5,6,33, 3,4,7,8,35,<br>34,37,38 36,39,40 | 1 Q6AY61                                                                                          |
| 2230 | 1,2,5,6,33, 3,4,7,8,35,<br>34,37,39 36,38,40 | 5 D3ZTX0,O70417,P02793,Q7TP54,P35280,Q99MH3                                                       |
| 2231 | 1,2,5,6,33, 3,4,7,8,35,<br>34,37,40 36,38,39 | 6 O70417,P35280,P52590,Q62714,Q6AY61,Q9EQS0                                                       |
| 2232 | 1,2,5,6,33, 3,4,7,8,35,<br>34,38,39 36,37,40 | 3 P02793,Q7TP54,P19132,P97829                                                                     |
| 2233 | 1,2,5,6,33, 3,4,7,8,35,<br>34,38,40 36,37,39 | 6 P01039,P36860,P52590,P63029,P97829,Q62714                                                       |
| 2234 | 1,2,5,6,33, 3,4,7,8,35,<br>34,39,40 36,37,38 | 6 O70417,P01039,P35280,P52590,Q99MH3,Q9EQS0                                                       |
| 2235 | 1,2,5,6,33, 3,4,7,8,34,<br>35,36,37 38,39,40 | 13 D3ZTX0,D4A5U3,F1M3L7,O70417,P00762,P11883,P12368,P35280,P52590,Q5QE79,Q64093,Q8<br>CIZ5,Q9EQS0 |
| 2236 | 1,2,5,6,33, 3,4,7,8,34,<br>35,36,38 37,39,40 | 5 P49134,P52590,Q03191,Q5I0J9,Q923V8                                                              |
| 2237 | 1,2,5,6,33, 3,4,7,8,34,<br>35,36,39 37,38,40 | 8 O70417,P00762,P23739,P35280,P49134,Q923V8,Q99MH3,Q9EQS0                                         |
| 2238 | 1,2,5,6,33, 3,4,7,8,34,<br>35,36,40 37,38,39 | 7 P00762,P35280,P49134,P52590,Q64093,Q9EQS0,Q9Z0V6                                                |
| 2239 | 1,2,5,6,33, 3,4,7,8,34,<br>35,37,38 36,39,40 | 4 P00762,P14173,Q5I0J9,Q68G31                                                                     |
| 2240 | 1,2,5,6,33, 3,4,7,8,34,<br>35,37,39 36,38,40 | 6 D3ZTX0,O70417,P00762,P02625,P35280,Q68G31                                                       |
| 2241 | 1,2,5,6,33, 3,4,7,8,34,<br>35,37,40 36,38,39 | 8 F1M3L7,O70417,P00762,P35280,P52590,Q64093,Q68G31,Q9EQS0                                         |
| 2242 | 1,2,5,6,33, 3,4,7,8,34,<br>35,38,39 36,37,40 | 3 P49134,Q68G31,Q923V8                                                                            |
| 2243 | 1,2,5,6,33, 3,4,7,8,34,<br>35,38,40 36,37,39 | 6 P01039,P52590,P63029,Q5I0J9,Q68G31,Q6P6R2                                                       |
| 2244 | 1,2,5,6,33, 3,4,7,8,34,<br>35,39,40 36,37,38 | 7 O70417,P00762,P01039,P02625,P29315,P35280,Q9EQS0                                                |
| 2245 | 1,2,5,6,33, 3,4,7,8,34,<br>36,37,38 35,39,40 | 6 P00762,P14173,P36860,P52590,Q68G31,Q9Z0V6                                                       |
| 2246 | 1,2,5,6,33, 3,4,7,8,34,<br>36,37,39 35,38,40 | 6 D3ZTX0,O70417,P00762,P35280,P36860,P52590                                                       |
| 2247 | 1,2,5,6,33, 3,4,7,8,34,<br>36,37,40 35,38,39 | 8 O70417,P00762,P11883,P35280,P36860,P52590,Q9EQS0,Q9Z0V6                                         |
| 2248 | 1,2,5,6,33, 3,4,7,8,34,<br>36,38,39 35,37,40 | 4 P36860,Q03191,Q923V8,Q99041                                                                     |

|      |                                              |                                                                                 |
|------|----------------------------------------------|---------------------------------------------------------------------------------|
| 2249 | 1,2,5,6,33, 3,4,7,8,34,<br>36,38,40 35,37,39 | 7 P01039,P36860,P52590,P63029,Q03191,Q923V8,Q9Z0V6                              |
| 2250 | 1,2,5,6,33, 3,4,7,8,34,<br>36,39,40 35,37,38 | 7 O70417,P00762,P01039,P35280,P36860,P52590,Q9EQS0                              |
| 2251 | 1,2,5,6,33, 3,4,7,8,34,<br>37,38,39 35,36,40 | 3 P00762,P36860,Q68G31                                                          |
| 2252 | 1,2,5,6,33, 3,4,7,8,34,<br>37,38,40 35,36,39 | 8 P00762,P01039,P14173,P36860,P52590,Q62714,Q68G31,Q9Z1F2                       |
| 2253 | 1,2,5,6,33, 3,4,7,8,34,<br>37,39,40 35,36,38 | 6 O70417,P00762,P01039,P02625,P35280,P36860                                     |
| 2254 | 1,2,5,6,33, 3,4,7,8,34,<br>38,39,40 35,36,37 | 11 P00762,P01039,P19132,P25031,P36860,P51740,P55091,P97840,Q68G31,Q6P6R2,Q923V8 |
| 2255 | 1,2,5,6,34, 3,4,7,8,33,<br>35,36,37 38,39,40 | 9 F1M3L7,O70417,P11883,P25236,P35280,P52590,Q5RKI1,Q64093,Q9EQS0                |
| 2256 | 1,2,5,6,34, 3,4,7,8,33,<br>35,36,38 37,39,40 | 4 P21674,Q5I0J9,Q5RKI1,Q9QWN8                                                   |
| 2257 | 1,2,5,6,34, 3,4,7,8,33,<br>35,36,39 37,38,40 | 5 O70417,P23739,P35280,Q9EQS0,Q9Z1F2                                            |
| 2258 | 1,2,5,6,34, 3,4,7,8,33,<br>35,36,40 37,38,39 | 4 P35280,P52590,Q5RKI1,Q9EQS0                                                   |
| 2259 | 1,2,5,6,34, 3,4,7,8,33,<br>35,37,38 36,39,40 | 3 P14173,Q5I0J9,Q5RKI1                                                          |
| 2260 | 1,2,5,6,34, 3,4,7,8,33,<br>35,37,39 36,38,40 | 2 O70417,P35280                                                                 |
| 2261 | 1,2,5,6,34, 3,4,7,8,33,<br>35,37,40 36,38,39 | 5 O70417,P35280,Q5RKI1,Q64093,Q9EQS0                                            |
| 2262 | 1,2,5,6,34, 3,4,7,8,33,<br>35,38,39 36,37,40 | 1 P08723                                                                        |
| 2263 | 1,2,5,6,34, 3,4,7,8,33,<br>35,38,40 36,37,39 | 3 Q5I0J9,Q5RKI1,Q6P6R2                                                          |
| 2264 | 1,2,5,6,34, 3,4,7,8,33,<br>35,39,40 36,37,38 | 3 O70417,P35280,Q9EQS0                                                          |
| 2265 | 1,2,5,6,34, 3,4,7,8,33,<br>36,37,38 35,39,40 | 5 P01835,P14173,Q4KLZ6,Q5RKI1,Q9JJ50                                            |
| 2266 | 1,2,5,6,34, 3,4,7,8,33,<br>36,37,39 35,38,40 | 3 O70417,P01835,P35280                                                          |
| 2267 | 1,2,5,6,34, 3,4,7,8,33,<br>36,37,40 35,38,39 | 8 O70417,P01835,P11883,P35280,P52590,Q5RKI1,Q9EQS0,Q9JJ50                       |
| 2268 | 1,2,5,6,34, 3,4,7,8,33,<br>36,38,39 35,37,40 | 1 P36860                                                                        |

|      |                                              |    |                                                                                                   |
|------|----------------------------------------------|----|---------------------------------------------------------------------------------------------------|
| 2269 | 1,2,5,6,34, 3,4,7,8,33,<br>36,38,40 35,37,39 | 4  | P36860,P52590,Q4KLZ6,Q5RKI1                                                                       |
| 2270 | 1,2,5,6,34, 3,4,7,8,33,<br>36,39,40 35,37,38 | 5  | B0BNN3,O70417,P35280,P52590,Q9EQS0                                                                |
| 2271 | 1,2,5,6,34, 3,4,7,8,33,<br>37,38,39 35,36,40 | 3  | O70417,P01835,Q6AY61                                                                              |
| 2272 | 1,2,5,6,34, 3,4,7,8,33,<br>37,38,40 35,36,39 | 7  | P01835,P14173,P20767,Q4KLZ6,Q5RKI1,Q62714,Q6AY61                                                  |
| 2273 | 1,2,5,6,34, 3,4,7,8,33,<br>37,39,40 35,36,38 | 4  | O70417,P01835,P35280,Q6AY61                                                                       |
| 2274 | 1,2,5,6,34, 3,4,7,8,33,<br>38,39,40 35,36,37 | 4  | P08723,P51740,P55091,P97840                                                                       |
| 2275 | 1,2,5,6,35, 3,4,7,8,33,<br>36,37,38 34,39,40 | 8  | F1M3L7,P00762,P14173,P19218,P19814,Q5I0J9,Q5RKI1,Q64093                                           |
| 2276 | 1,2,5,6,35, 3,4,7,8,33,<br>36,37,39 34,38,40 | 6  | F1M3L7,O70417,P00762,P02625,P35280,Q9EQS0                                                         |
| 2277 | 1,2,5,6,35, 3,4,7,8,33,<br>36,37,40 34,38,39 | 12 | F1M3L7,O70417,P00762,P25236,P35280,P46720,P52590,P82471,Q5RKI1,Q64093,Q9EQS0,Q9Z0V6               |
| 2278 | 1,2,5,6,35, 3,4,7,8,33,<br>36,38,39 34,37,40 | 3  | P00762,P19814,Q923V8                                                                              |
| 2279 | 1,2,5,6,35, 3,4,7,8,33,<br>36,38,40 34,37,39 | 8  | P00762,P19814,P52590,Q5I0J9,Q5RKI1,Q923V8,Q9QX74,Q9Z0V6                                           |
| 2280 | 1,2,5,6,35, 3,4,7,8,33,<br>36,39,40 34,37,38 | 7  | B0BNN3,O70417,P00762,P02625,P35280,P52590,Q9EQS0                                                  |
| 2281 | 1,2,5,6,35, 3,4,7,8,33,<br>37,38,39 34,36,40 | 6  | P00762,P14173,P19814,P26772,Q5I0J9,Q9QX74                                                         |
| 2282 | 1,2,5,6,35, 3,4,7,8,33,<br>37,38,40 34,36,39 | 10 | P00762,P14173,P19814,P20646,P26772,P82471,Q5I0J9,Q5RKI1,Q64093,Q9QX74                             |
| 2283 | 1,2,5,6,35, 3,4,7,8,33,<br>37,39,40 34,36,38 | 8  | O70417,P00762,P02625,P26772,P35280,P82471,Q9EQS0,Q9QX74                                           |
| 2284 | 1,2,5,6,35, 3,4,7,8,33,<br>38,39,40 34,36,37 | 14 | P00762,P02625,P08723,P0C0A9,P19814,P20646,P26772,P51740,P55091,P98089,Q5EGZ1,Q62635,Q6P6R2,Q9QX74 |
| 2285 | 1,2,5,6,36, 3,4,7,8,33,<br>37,38,39 34,35,40 | 5  | O70417,P00762,P01835,P19814,P36860                                                                |
| 2286 | 1,2,5,6,36, 3,4,7,8,33,<br>37,38,40 34,35,39 | 11 | P00762,P01835,P14173,P19814,P36860,P52590,P82471,Q5GRG2,Q5RKI1,Q9QX74,Q9Z0V6                      |
| 2287 | 1,2,5,6,36, 3,4,7,8,33,<br>37,39,40 34,35,38 | 11 | O70417,P00762,P01835,P02625,P19629,P35280,P36860,P52590,P82471,Q9EQS0,Q9QX74                      |
| 2288 | 1,2,5,6,36, 3,4,7,8,33,<br>38,39,40 34,35,37 | 6  | P00762,P19814,P36860,P51740,Q923V8,Q9QX74                                                         |

|      |                                              |                                                                          |
|------|----------------------------------------------|--------------------------------------------------------------------------|
| 2289 | 1,2,5,6,37, 3,4,7,8,33,<br>38,39,40 34,35,36 | 10 O70417,P00762,P01835,P14173,P19814,P26772,P36860,P51740,P82471,Q9QX74 |
| 2290 | 1,2,5,7,8,3 3,4,6,36,3<br>3,34,35 7,38,39,40 | 3 iRT-Kit_WR_fusion,P51740,Q9QX74                                        |
| 2291 | 1,2,5,7,8,3 3,4,6,35,3<br>3,34,36 7,38,39,40 | 6 iRT-Kit_WR_fusion,P06760,P08721,P51740,Q63751,Q9QX74                   |
| 2292 | 1,2,5,7,8,3 3,4,6,35,3<br>3,34,37 6,38,39,40 | 5 P06760,P51740,Q63751,Q66H69,Q6IG05                                     |
| 2293 | 1,2,5,7,8,3 3,4,6,35,3<br>3,34,38 6,37,39,40 | 4 iRT-Kit_WR_fusion,P06760,P50116,Q6IG05                                 |
| 2294 | 1,2,5,7,8,3 3,4,6,35,3<br>3,34,39 6,37,38,40 | 5 P02793;Q7TP54,P09656,Q6AYQ8,Q9QX74,Q9Z0V6                              |
| 2295 | 1,2,5,7,8,3 3,4,6,35,3<br>3,34,40 6,37,38,39 | 3 iRT-Kit_WR_fusion,P00731,P09656                                        |
| 2296 | 1,2,5,7,8,3 3,4,6,34,3<br>3,35,36 7,38,39,40 | 1 P51740                                                                 |
| 2297 | 1,2,5,7,8,3 3,4,6,34,3<br>3,35,37 6,38,39,40 | 2 F1M3L7,P51740                                                          |
| 2298 | 1,2,5,7,8,3 3,4,6,34,3<br>3,35,38 6,37,39,40 | 2 iRT-Kit_WR_fusion,Q6IG05                                               |
| 2299 | 1,2,5,7,8,3 3,4,6,34,3<br>3,35,39 6,37,38,40 | 2 P29315,Q4KLZ6                                                          |
| 2300 | 1,2,5,7,8,3 3,4,6,34,3<br>3,35,40 6,37,38,39 | 1 P29315                                                                 |
| 2301 | 1,2,5,7,8,3 3,4,6,34,3<br>3,36,37 5,38,39,40 | 3 P47967,P51740,Q63751                                                   |
| 2302 | 1,2,5,7,8,3 3,4,6,34,3<br>3,36,38 5,37,39,40 | 2 iRT-Kit_WR_fusion,Q6IG05                                               |
| 2303 | 1,2,5,7,8,3 3,4,6,34,3<br>3,36,39 5,37,38,40 | 1 P00714                                                                 |
| 2304 | 1,2,5,7,8,3 3,4,6,34,3<br>3,36,40 5,37,38,39 | 0                                                                        |
| 2305 | 1,2,5,7,8,3 3,4,6,34,3<br>3,37,38 5,36,39,40 | 1 Q6IG05                                                                 |
| 2306 | 1,2,5,7,8,3 3,4,6,34,3<br>3,37,39 5,36,38,40 | 1 Q6AYQ8                                                                 |
| 2307 | 1,2,5,7,8,3 3,4,6,34,3<br>3,37,40 5,36,38,39 | 1 Q62714                                                                 |
| 2308 | 1,2,5,7,8,3 3,4,6,34,3<br>3,38,39 5,36,37,40 | 2 P19132,Q63556                                                          |

|      |                        |                          |                                                    |
|------|------------------------|--------------------------|----------------------------------------------------|
| 2309 | 1,2,5,7,8,3<br>3,38,40 | 3,4,6,34,3<br>5,36,37,39 | 1 Q6IG05                                           |
| 2310 | 1,2,5,7,8,3<br>3,39,40 | 3,4,6,34,3<br>5,36,37,38 | 1 P29315                                           |
| 2311 | 1,2,5,7,8,3<br>4,35,36 | 3,4,6,33,3<br>7,38,39,40 | 4 iRT-Kit_WR_fusion,P51740,Q66H69,Q9Z1F2           |
| 2312 | 1,2,5,7,8,3<br>4,35,37 | 3,4,6,33,3<br>6,38,39,40 | 4 P06760,P25809,P51740,Q66H69                      |
| 2313 | 1,2,5,7,8,3<br>4,35,38 | 3,4,6,33,3<br>6,37,39,40 | 3 iRT-Kit_WR_fusion,P25809,Q6IG05                  |
| 2314 | 1,2,5,7,8,3<br>4,35,39 | 3,4,6,33,3<br>6,37,38,40 | 5 P09656,P25809,Q9WTT6,Q9Z0V6,Q9Z1F2               |
| 2315 | 1,2,5,7,8,3<br>4,35,40 | 3,4,6,33,3<br>6,37,38,39 | 2 P09656,Q66H69                                    |
| 2316 | 1,2,5,7,8,3<br>4,36,37 | 3,4,6,33,3<br>5,38,39,40 | 7 P06760,P47967,P51740,P55091,P62804,Q66H69,Q9JJ50 |
| 2317 | 1,2,5,7,8,3<br>4,36,38 | 3,4,6,33,3<br>5,37,39,40 | 2 iRT-Kit_WR_fusion,Q6IG05                         |
| 2318 | 1,2,5,7,8,3<br>4,36,39 | 3,4,6,33,3<br>5,37,38,40 | 3 P00714,Q9Z0V6,Q9Z1F2                             |
| 2319 | 1,2,5,7,8,3<br>4,36,40 | 3,4,6,33,3<br>5,37,38,39 | 2 iRT-Kit_WR_fusion,Q66H69                         |
| 2320 | 1,2,5,7,8,3<br>4,37,38 | 3,4,6,33,3<br>5,36,39,40 | 4 P06760,P62804,Q6AY61,Q6IG05                      |
| 2321 | 1,2,5,7,8,3<br>4,37,39 | 3,4,6,33,3<br>5,36,38,40 | 3 P06760,Q66H69,Q9Z0V6                             |
| 2322 | 1,2,5,7,8,3<br>4,37,40 | 3,4,6,33,3<br>5,36,38,39 | 4 P06760,P62804,Q66H69,Q9JJ50                      |
| 2323 | 1,2,5,7,8,3<br>4,38,39 | 3,4,6,33,3<br>5,36,37,40 | 5 P09656,P19132,Q63556,Q9WTT6,Q9Z0V6               |
| 2324 | 1,2,5,7,8,3<br>4,38,40 | 3,4,6,33,3<br>5,36,37,39 | 4 iRT-Kit_WR_fusion,P09656,P97580,Q6IG05           |
| 2325 | 1,2,5,7,8,3<br>4,39,40 | 3,4,6,33,3<br>5,36,37,38 | 2 P09656,Q9Z0V6                                    |
| 2326 | 1,2,5,7,8,3<br>5,36,37 | 3,4,6,33,3<br>4,38,39,40 | 6 F1M3L7,P19218,P47967,P51740,Q5I0D1,Q66H69        |
| 2327 | 1,2,5,7,8,3<br>5,36,38 | 3,4,6,33,3<br>4,37,39,40 | 2 P19218,P19814                                    |
| 2328 | 1,2,5,7,8,3<br>5,36,39 | 3,4,6,33,3<br>4,37,38,40 | 2 P23739,Q9Z1F2                                    |

|      |                         |                          |                                             |
|------|-------------------------|--------------------------|---------------------------------------------|
| 2329 | 1,2,5,7,8,3<br>5,36,40  | 3,4,6,33,3<br>4,37,38,39 | 0                                           |
| 2330 | 1,2,5,7,8,3<br>5,37,38  | 3,4,6,33,3<br>4,36,39,40 | 3 P19218,P19814,Q6IG05                      |
| 2331 | 1,2,5,7,8,3<br>5,37,39  | 3,4,6,33,3<br>4,36,38,40 | 1 P00762                                    |
| 2332 | 1,2,5,7,8,3<br>5,37,40  | 3,4,6,33,3<br>4,36,38,39 | 2 P00762,Q66H69                             |
| 2333 | 1,2,5,7,8,3<br>5,38,39  | 3,4,6,33,3<br>4,36,37,40 | 2 P11883,P19814                             |
| 2334 | 1,2,5,7,8,3<br>5,38,40  | 3,4,6,33,3<br>4,36,37,39 | 2 P19814,Q62635                             |
| 2335 | 1,2,5,7,8,3<br>5,39,40  | 3,4,6,33,3<br>4,36,37,38 | 1 P29315                                    |
| 2336 | 1,2,5,7,8,3<br>6,37,38  | 3,4,6,33,3<br>4,35,39,40 | 3 P19218,P19814,Q6IG05                      |
| 2337 | 1,2,5,7,8,3<br>6,37,39  | 3,4,6,33,3<br>4,35,38,40 | 2 P00762,Q06000                             |
| 2338 | 1,2,5,7,8,3<br>6,37,40  | 3,4,6,33,3<br>4,35,38,39 | 2 P00762,Q66H69                             |
| 2339 | 1,2,5,7,8,3<br>6,38,39  | 3,4,6,33,3<br>4,35,37,40 | 1 P19814                                    |
| 2340 | 1,2,5,7,8,3<br>6,38,40  | 3,4,6,33,3<br>4,35,37,39 | 1 P19814                                    |
| 2341 | 1,2,5,7,8,3<br>6,39,40  | 3,4,6,33,3<br>4,35,37,38 | 1 B0BNN3                                    |
| 2342 | 1,2,5,7,8,3<br>7,38,39  | 3,4,6,33,3<br>4,35,36,40 | 2 P19814,Q6PCU2                             |
| 2343 | 1,2,5,7,8,3<br>7,38,40  | 3,4,6,33,3<br>4,35,36,39 | 6 P01835,P14173,P19814,P22006,Q6IG05,Q6PCU2 |
| 2344 | 1,2,5,7,8,3<br>7,39,40  | 3,4,6,33,3<br>4,35,36,38 | 1 P00762                                    |
| 2345 | 1,2,5,7,8,3<br>8,39,40  | 3,4,6,33,3<br>4,35,36,37 | 5 P11883,P19814,P55091,Q62635,Q6PCU2        |
| 2346 | 1,2,5,7,33,<br>34,35,36 | 3,4,6,8,37,<br>38,39,40  | 5 D3ZUC6,P08721,P51740,Q9EQS0,Q9R168        |
| 2347 | 1,2,5,7,33,<br>34,35,37 | 3,4,6,8,36,<br>38,39,40  | 4 O70417,P51740,P54921,Q9R168               |
| 2348 | 1,2,5,7,33,<br>34,35,38 | 3,4,6,8,36,<br>37,39,40  | 3 P80299,P97829,Q9R168                      |

|      |                                              |                                                                          |
|------|----------------------------------------------|--------------------------------------------------------------------------|
| 2349 | 1,2,5,7,33, 3,4,6,8,36,<br>34,35,39 37,38,40 | 1 P09656                                                                 |
| 2350 | 1,2,5,7,33, 3,4,6,8,36,<br>34,35,40 37,38,39 | 3 P09656,Q9EQS0,Q9R168                                                   |
| 2351 | 1,2,5,7,33, 3,4,6,8,35,<br>34,36,37 38,39,40 | 10 O70417,P00774,P08721,P47967,P51740,P54921,P98089,Q62635,Q63751,Q9R168 |
| 2352 | 1,2,5,7,33, 3,4,6,8,35,<br>34,36,38 37,39,40 | 4 P08721,P80299,Q03191,Q9R168                                            |
| 2353 | 1,2,5,7,33, 3,4,6,8,35,<br>34,36,39 37,38,40 | 3 O70417,P00714,Q99041                                                   |
| 2354 | 1,2,5,7,33, 3,4,6,8,35,<br>34,36,40 37,38,39 | 1 Q9EQS0                                                                 |
| 2355 | 1,2,5,7,33, 3,4,6,8,35,<br>34,37,38 36,39,40 | 3 P54921,Q6AY61,Q9R168                                                   |
| 2356 | 1,2,5,7,33, 3,4,6,8,35,<br>34,37,39 36,38,40 | 4 O70417,P02793,Q7TP54,Q6AY61,Q6AYQ8                                     |
| 2357 | 1,2,5,7,33, 3,4,6,8,35,<br>34,37,40 36,38,39 | 4 O70417,Q62714,Q6AY61,Q9R168                                            |
| 2358 | 1,2,5,7,33, 3,4,6,8,35,<br>34,38,39 36,37,40 | 7 P02793;Q7TP54,P09656,P19132,P80299,Q63556,Q6AY61,Q99041                |
| 2359 | 1,2,5,7,33, 3,4,6,8,35,<br>34,38,40 36,37,39 | 8 P01039,P09656,P50116,P80299,P97829,Q62714,Q6AY61,Q9R168                |
| 2360 | 1,2,5,7,33, 3,4,6,8,35,<br>34,39,40 36,37,38 | 3 O70417,P09656,Q6AY61                                                   |
| 2361 | 1,2,5,7,33, 3,4,6,8,34,<br>35,36,37 38,39,40 | 5 F1M3L7,P00762,P47967,P51740,Q9R168                                     |
| 2362 | 1,2,5,7,33, 3,4,6,8,34,<br>35,36,38 37,39,40 | 4 P49134,Q03191,Q923V8,Q9R168                                            |
| 2363 | 1,2,5,7,33, 3,4,6,8,34,<br>35,36,39 37,38,40 | 2 P23739,P49134                                                          |
| 2364 | 1,2,5,7,33, 3,4,6,8,34,<br>35,36,40 37,38,39 | 1 Q9EQS0                                                                 |
| 2365 | 1,2,5,7,33, 3,4,6,8,34,<br>35,37,38 36,39,40 | 2 P14173,Q9R168                                                          |
| 2366 | 1,2,5,7,33, 3,4,6,8,34,<br>35,37,39 36,38,40 | 3 O70417,P00762,P02625                                                   |
| 2367 | 1,2,5,7,33, 3,4,6,8,34,<br>35,37,40 36,38,39 | 4 O70417,P00762,P02625,Q9EQS0                                            |
| 2368 | 1,2,5,7,33, 3,4,6,8,34,<br>35,38,39 36,37,40 | 1 Q63556                                                                 |

|      |                                              |                                             |
|------|----------------------------------------------|---------------------------------------------|
| 2369 | 1,2,5,7,33, 3,4,6,8,34,<br>35,38,40 36,37,39 | 2 P01039,Q9R168                             |
| 2370 | 1,2,5,7,33, 3,4,6,8,34,<br>35,39,40 36,37,38 | 4 P00762,P02625,P29315,Q9EQS0               |
| 2371 | 1,2,5,7,33, 3,4,6,8,34,<br>36,37,38 35,39,40 | 2 P14173,P36860                             |
| 2372 | 1,2,5,7,33, 3,4,6,8,34,<br>36,37,39 35,38,40 | 2 O70417,P00762                             |
| 2373 | 1,2,5,7,33, 3,4,6,8,34,<br>36,37,40 35,38,39 | 3 O70417,P00762,P36860                      |
| 2374 | 1,2,5,7,33, 3,4,6,8,34,<br>36,38,39 35,37,40 | 4 P36860,Q03191,Q923V8,Q99041               |
| 2375 | 1,2,5,7,33, 3,4,6,8,34,<br>36,38,40 35,37,39 | 4 P01039,P36860,Q03191,Q923V8               |
| 2376 | 1,2,5,7,33, 3,4,6,8,34,<br>36,39,40 35,37,38 | 3 O70417,P00762,P36860                      |
| 2377 | 1,2,5,7,33, 3,4,6,8,34,<br>37,38,39 35,36,40 | 2 P00762,Q6AY61                             |
| 2378 | 1,2,5,7,33, 3,4,6,8,34,<br>37,38,40 35,36,39 | 4 P00762,P14173,Q62714,Q6AY61               |
| 2379 | 1,2,5,7,33, 3,4,6,8,34,<br>37,39,40 35,36,38 | 5 O70417,P00762,P02625,Q6AY61,Q6AYQ8        |
| 2380 | 1,2,5,7,33, 3,4,6,8,34,<br>38,39,40 35,36,37 | 6 P01039,P19132,P36860,P55091,Q63556,Q6AY61 |
| 2381 | 1,2,5,7,34, 3,4,6,8,33,<br>35,36,37 38,39,40 | 5 O70417,P25031,P47967,P51740,Q9R168        |
| 2382 | 1,2,5,7,34, 3,4,6,8,33,<br>35,36,38 37,39,40 | 2 Q9QWN8,Q9R168                             |
| 2383 | 1,2,5,7,34, 3,4,6,8,33,<br>35,36,39 37,38,40 | 2 P23739,Q9Z1F2                             |
| 2384 | 1,2,5,7,34, 3,4,6,8,33,<br>35,36,40 37,38,39 | 1 Q9EQS0                                    |
| 2385 | 1,2,5,7,34, 3,4,6,8,33,<br>35,37,38 36,39,40 | 2 P14173,Q9R168                             |
| 2386 | 1,2,5,7,34, 3,4,6,8,33,<br>35,37,39 36,38,40 | 1 O70417                                    |
| 2387 | 1,2,5,7,34, 3,4,6,8,33,<br>35,37,40 36,38,39 | 1 O70417                                    |
| 2388 | 1,2,5,7,34, 3,4,6,8,33,<br>35,38,39 36,37,40 | 1 P09656                                    |



|      |                                              |                                             |
|------|----------------------------------------------|---------------------------------------------|
| 2389 | 1,2,5,7,34, 3,4,6,8,33,<br>35,38,40 36,37,39 | 2 P09656,Q9R168                             |
| 2390 | 1,2,5,7,34, 3,4,6,8,33,<br>35,39,40 36,37,38 | 2 O70417,P09656                             |
| 2391 | 1,2,5,7,34, 3,4,6,8,33,<br>36,37,38 35,39,40 | 3 P01835,P14173,Q9R168                      |
| 2392 | 1,2,5,7,34, 3,4,6,8,33,<br>36,37,39 35,38,40 | 2 O70417,P01835                             |
| 2393 | 1,2,5,7,34, 3,4,6,8,33,<br>36,37,40 35,38,39 | 3 O70417,P01835,Q9JJ50                      |
| 2394 | 1,2,5,7,34, 3,4,6,8,33,<br>36,38,39 35,37,40 | 0                                           |
| 2395 | 1,2,5,7,34, 3,4,6,8,33,<br>36,38,40 35,37,39 | 1 Q5RLM2                                    |
| 2396 | 1,2,5,7,34, 3,4,6,8,33,<br>36,39,40 35,37,38 | 1 O70417                                    |
| 2397 | 1,2,5,7,34, 3,4,6,8,33,<br>37,38,39 35,36,40 | 2 P01835,Q6AY61                             |
| 2398 | 1,2,5,7,34, 3,4,6,8,33,<br>37,38,40 35,36,39 | 5 P01835,P14173,P20767,Q62714,Q6AY61        |
| 2399 | 1,2,5,7,34, 3,4,6,8,33,<br>37,39,40 35,36,38 | 3 O70417,P01835,Q6AY61                      |
| 2400 | 1,2,5,7,34, 3,4,6,8,33,<br>38,39,40 35,36,37 | 3 P09656,P55091,Q6AY61                      |
| 2401 | 1,2,5,7,35, 3,4,6,8,33,<br>36,37,38 34,39,40 | 5 F1M3L7,P00762,P14173,P19218,P19814        |
| 2402 | 1,2,5,7,35, 3,4,6,8,33,<br>36,37,39 34,38,40 | 3 O70417,P00762,P02625                      |
| 2403 | 1,2,5,7,35, 3,4,6,8,33,<br>36,37,40 34,38,39 | 6 F1M3L7,O70417,P00762,P02625,P14173,Q9EQS0 |
| 2404 | 1,2,5,7,35, 3,4,6,8,33,<br>36,38,39 34,37,40 | 2 P00762,P19814                             |
| 2405 | 1,2,5,7,35, 3,4,6,8,33,<br>36,38,40 34,37,39 | 3 P00762,P19814,Q9QWN8                      |
| 2406 | 1,2,5,7,35, 3,4,6,8,33,<br>36,39,40 34,37,38 | 5 O70417,P00762,P02625,P23739,Q9EQS0        |
| 2407 | 1,2,5,7,35, 3,4,6,8,33,<br>37,38,39 34,36,40 | 6 P00762,P02625,P08649,P14173,P19814,P26772 |
| 2408 | 1,2,5,7,35, 3,4,6,8,33,<br>37,38,40 34,36,39 | 5 P00762,P08649,P14173,P19814,P26772        |

|      |                                              |                                                                  |
|------|----------------------------------------------|------------------------------------------------------------------|
| 2409 | 1,2,5,7,35, 3,4,6,8,33,<br>37,39,40 34,36,38 | 5 O70417,P00762,P02625,P08649,P26772                             |
| 2410 | 1,2,5,7,35, 3,4,6,8,33,<br>38,39,40 34,36,37 | 8 P00762,P02625,P08649,P19814,P26772,P55091,P98089,Q62635        |
| 2411 | 1,2,5,7,36, 3,4,6,8,33,<br>37,38,39 34,35,40 | 4 P00762,P01835,P14173,P19814                                    |
| 2412 | 1,2,5,7,36, 3,4,6,8,33,<br>37,38,40 34,35,39 | 5 P00762,P01835,P14173,P19814,P36860                             |
| 2413 | 1,2,5,7,36, 3,4,6,8,33,<br>37,39,40 34,35,38 | 4 O70417,P00762,P01835,P02625                                    |
| 2414 | 1,2,5,7,36, 3,4,6,8,33,<br>38,39,40 34,35,37 | 3 P00762,P19814,P36860                                           |
| 2415 | 1,2,5,7,37, 3,4,6,8,33,<br>38,39,40 34,35,36 | 9 P00762,P01835,P02625,P08649,P14173,P26772,Q5I0D7,Q6AY61,Q6PCU2 |
| 2416 | 1,2,5,8,33, 3,4,6,7,37,<br>34,35,36 38,39,40 | 4 D3ZUC6,O89117,P51740,Q5QE79                                    |
| 2417 | 1,2,5,8,33, 3,4,6,7,36,<br>34,35,37 38,39,40 | 5 F1M3L7,O89117,P25809,P51740,Q5QE79                             |
| 2418 | 1,2,5,8,33, 3,4,6,7,36,<br>34,35,38 37,39,40 | 2 P25809,Q6IG05                                                  |
| 2419 | 1,2,5,8,33, 3,4,6,7,36,<br>34,35,39 37,38,40 | 1 P25809                                                         |
| 2420 | 1,2,5,8,33, 3,4,6,7,36,<br>34,35,40 37,38,39 | 1 P09656                                                         |
| 2421 | 1,2,5,8,33, 3,4,6,7,35,<br>34,36,37 38,39,40 | 4 P51740,P98089,Q5QE79,Q63751                                    |
| 2422 | 1,2,5,8,33, 3,4,6,7,35,<br>34,36,38 37,39,40 | 2 Q6IG05,Q99041                                                  |
| 2423 | 1,2,5,8,33, 3,4,6,7,35,<br>34,36,39 37,38,40 | 3 P00714,Q99041,Q99MH3                                           |
| 2424 | 1,2,5,8,33, 3,4,6,7,35,<br>34,36,40 37,38,39 | 1 Q5QE79                                                         |
| 2425 | 1,2,5,8,33, 3,4,6,7,35,<br>34,37,38 36,39,40 | 1 Q6IG05                                                         |
| 2426 | 1,2,5,8,33, 3,4,6,7,35,<br>34,37,39 36,38,40 | 4 O70417,P02793,Q7TP54,Q99376,Q9QWN8                             |
| 2427 | 1,2,5,8,33, 3,4,6,7,35,<br>34,37,40 36,38,39 | 1 P13432                                                         |
| 2428 | 1,2,5,8,33, 3,4,6,7,35,<br>34,38,39 36,37,40 | 4 P02793;Q7TP54,P19132,Q6IG05,Q99041                             |

|      |                                              |                                      |
|------|----------------------------------------------|--------------------------------------|
| 2429 | 1,2,5,8,33, 3,4,6,7,35,<br>34,38,40 36,37,39 | 5 P01039,P09656,P15399,P97580,Q6IG05 |
| 2430 | 1,2,5,8,33, 3,4,6,7,35,<br>34,39,40 36,37,38 | 1 P09656                             |
| 2431 | 1,2,5,8,33, 3,4,6,7,34,<br>35,36,37 38,39,40 | 3 F1M3L7,P51740,Q5QE79               |
| 2432 | 1,2,5,8,33, 3,4,6,7,34,<br>35,36,38 37,39,40 | 1 P49134                             |
| 2433 | 1,2,5,8,33, 3,4,6,7,34,<br>35,36,39 37,38,40 | 3 P00714,P23739,P49134               |
| 2434 | 1,2,5,8,33, 3,4,6,7,34,<br>35,36,40 37,38,39 | 1 P01681                             |
| 2435 | 1,2,5,8,33, 3,4,6,7,34,<br>35,37,38 36,39,40 | 3 F1M3L7,Q68G31,Q6IG05               |
| 2436 | 1,2,5,8,33, 3,4,6,7,34,<br>35,37,39 36,38,40 | 1 F1M3L7                             |
| 2437 | 1,2,5,8,33, 3,4,6,7,34,<br>35,37,40 36,38,39 | 1 F1M3L7                             |
| 2438 | 1,2,5,8,33, 3,4,6,7,34,<br>35,38,39 36,37,40 | 3 P11598,P19132,Q68G31               |
| 2439 | 1,2,5,8,33, 3,4,6,7,34,<br>35,38,40 36,37,39 | 1 Q68G31                             |
| 2440 | 1,2,5,8,33, 3,4,6,7,34,<br>35,39,40 36,37,38 | 1 P29315                             |
| 2441 | 1,2,5,8,33, 3,4,6,7,34,<br>36,37,38 35,39,40 | 2 F1M3L7,Q6IG05                      |
| 2442 | 1,2,5,8,33, 3,4,6,7,34,<br>36,37,39 35,38,40 | 2 F1M3L7,P00714                      |
| 2443 | 1,2,5,8,33, 3,4,6,7,34,<br>36,37,40 35,38,39 | 1 F1M3L7                             |
| 2444 | 1,2,5,8,33, 3,4,6,7,34,<br>36,38,39 35,37,40 | 3 P00714,P19132,Q99041               |
| 2445 | 1,2,5,8,33, 3,4,6,7,34,<br>36,38,40 35,37,39 | 0                                    |
| 2446 | 1,2,5,8,33, 3,4,6,7,34,<br>36,39,40 35,37,38 | 0                                    |
| 2447 | 1,2,5,8,33, 3,4,6,7,34,<br>37,38,39 35,36,40 | 3 P19132,Q68G31,Q6IG05               |
| 2448 | 1,2,5,8,33, 3,4,6,7,34,<br>37,38,40 35,36,39 | 3 Q62714,Q68G31,Q6IG05               |

|      |                                              |                                             |
|------|----------------------------------------------|---------------------------------------------|
| 2449 | 1,2,5,8,33, 3,4,6,7,34,<br>37,39,40 35,36,38 | 2 O70417,Q9QWN8                             |
| 2450 | 1,2,5,8,33, 3,4,6,7,34,<br>38,39,40 35,36,37 | 6 P01039,P19132,P25031,P55091,P97840,Q62635 |
| 2451 | 1,2,5,8,34, 3,4,6,7,33,<br>35,36,37 38,39,40 | 3 F1M3L7,P51740,Q5RKI1                      |
| 2452 | 1,2,5,8,34, 3,4,6,7,33,<br>35,36,38 37,39,40 | 3 P25809,Q5RKI1,Q6IG05                      |
| 2453 | 1,2,5,8,34, 3,4,6,7,33,<br>35,36,39 37,38,40 | 2 P23739,Q9Z1F2                             |
| 2454 | 1,2,5,8,34, 3,4,6,7,33,<br>35,36,40 37,38,39 | 1 Q5RKI1                                    |
| 2455 | 1,2,5,8,34, 3,4,6,7,33,<br>35,37,38 36,39,40 | 3 P25809,Q5RKI1,Q6IG05                      |
| 2456 | 1,2,5,8,34, 3,4,6,7,33,<br>35,37,39 36,38,40 | 1 P25809                                    |
| 2457 | 1,2,5,8,34, 3,4,6,7,33,<br>35,37,40 36,38,39 | 1 Q5RKI1                                    |
| 2458 | 1,2,5,8,34, 3,4,6,7,33,<br>35,38,39 36,37,40 | 1 P25809                                    |
| 2459 | 1,2,5,8,34, 3,4,6,7,33,<br>35,38,40 36,37,39 | 6 P09656,P15399,P97580,Q30KJ2,Q5RKI1,Q6IG05 |
| 2460 | 1,2,5,8,34, 3,4,6,7,33,<br>35,39,40 36,37,38 | 3 P09656,P15399,P97580                      |
| 2461 | 1,2,5,8,34, 3,4,6,7,33,<br>36,37,38 35,39,40 | 2 Q5RKI1,Q6IG05                             |
| 2462 | 1,2,5,8,34, 3,4,6,7,33,<br>36,37,39 35,38,40 | 2 O70417,P00714                             |
| 2463 | 1,2,5,8,34, 3,4,6,7,33,<br>36,37,40 35,38,39 | 2 P13432,Q5RKI1                             |
| 2464 | 1,2,5,8,34, 3,4,6,7,33,<br>36,38,39 35,37,40 | 1 P19132                                    |
| 2465 | 1,2,5,8,34, 3,4,6,7,33,<br>36,38,40 35,37,39 | 4 P15399,P97580,Q5RKI1,Q6IG05               |
| 2466 | 1,2,5,8,34, 3,4,6,7,33,<br>36,39,40 35,37,38 | 0                                           |
| 2467 | 1,2,5,8,34, 3,4,6,7,33,<br>37,38,39 35,36,40 | 1 Q6IG05                                    |
| 2468 | 1,2,5,8,34, 3,4,6,7,33,<br>37,38,40 35,36,39 | 4 P15399,P97580,Q5RKI1,Q6IG05               |

|      |                                              |                                                           |
|------|----------------------------------------------|-----------------------------------------------------------|
| 2469 | 1,2,5,8,34, 3,4,6,7,33,<br>37,39,40 35,36,38 | 2 O70417,P13432                                           |
| 2470 | 1,2,5,8,34, 3,4,6,7,33,<br>38,39,40 35,36,37 | 7 P09656,P15399,P19132,P55091,P97580,P97840,Q30KJ2        |
| 2471 | 1,2,5,8,35, 3,4,6,7,33,<br>36,37,38 34,39,40 | 4 F1M3L7,P19218,P19814,Q5RKI1                             |
| 2472 | 1,2,5,8,35, 3,4,6,7,33,<br>36,37,39 34,38,40 | 2 F1M3L7,P23739                                           |
| 2473 | 1,2,5,8,35, 3,4,6,7,33,<br>36,37,40 34,38,39 | 3 F1M3L7,P80299,Q5RKI1                                    |
| 2474 | 1,2,5,8,35, 3,4,6,7,33,<br>36,38,39 34,37,40 | 2 P19814,P23739                                           |
| 2475 | 1,2,5,8,35, 3,4,6,7,33,<br>36,38,40 34,37,39 | 2 P19814,Q5RKI1                                           |
| 2476 | 1,2,5,8,35, 3,4,6,7,33,<br>36,39,40 34,37,38 | 1 P23739                                                  |
| 2477 | 1,2,5,8,35, 3,4,6,7,33,<br>37,38,39 34,36,40 | 2 F1M3L7,P19814                                           |
| 2478 | 1,2,5,8,35, 3,4,6,7,33,<br>37,38,40 34,36,39 | 4 F1M3L7,P19814,P26772,Q5RKI1                             |
| 2479 | 1,2,5,8,35, 3,4,6,7,33,<br>37,39,40 34,36,38 | 3 F1M3L7,P26772,P80299                                    |
| 2480 | 1,2,5,8,35, 3,4,6,7,33,<br>38,39,40 34,36,37 | 7 P11598,P19814,P26772,P55091,P98089,Q5EGZ1,Q62635        |
| 2481 | 1,2,5,8,36, 3,4,6,7,33,<br>37,38,39 34,35,40 | 0                                                         |
| 2482 | 1,2,5,8,36, 3,4,6,7,33,<br>37,38,40 34,35,39 | 1 Q5RKI1                                                  |
| 2483 | 1,2,5,8,36, 3,4,6,7,33,<br>37,39,40 34,35,38 | 2 O70417,P80299                                           |
| 2484 | 1,2,5,8,36, 3,4,6,7,33,<br>38,39,40 34,35,37 | 0                                                         |
| 2485 | 1,2,5,8,37, 3,4,6,7,33,<br>38,39,40 34,35,36 | 4 P08721,P26772,Q5I0D7,Q6PCU2                             |
| 2486 | 1,2,5,33,3 3,4,6,7,8,3<br>4,35,36,37 8,39,40 | 8 D3ZUC6,F1M3L7,O70417,P22273,P35280,P51740,Q5QE79,Q9EQS0 |
| 2487 | 1,2,5,33,3 3,4,6,7,8,3<br>4,35,36,38 7,39,40 | 6 D3ZUC6,P22273,P49134,Q03191,Q99041,Q9R168               |
| 2488 | 1,2,5,33,3 3,4,6,7,8,3<br>4,35,36,39 7,38,40 | 8 D3ZUC6,O70417,P22273,P23739,P35280,P49134,Q99041,Q9EQS0 |

|      |                                              |                                                                                 |
|------|----------------------------------------------|---------------------------------------------------------------------------------|
| 2489 | 1,2,5,33,3 3,4,6,7,8,3<br>4,35,36,40 7,38,39 | 8 D3ZUC6,O70417,P22273,P35280,Q5QE79,Q63617,Q99041,Q9EQS0                       |
| 2490 | 1,2,5,33,3 3,4,6,7,8,3<br>4,35,37,38 6,39,40 | 2 P22273,Q9R168                                                                 |
| 2491 | 1,2,5,33,3 3,4,6,7,8,3<br>4,35,37,39 6,38,40 | 3 O70417,P35280,Q99041                                                          |
| 2492 | 1,2,5,33,3 3,4,6,7,8,3<br>4,35,37,40 6,38,39 | 3 O70417,P35280,Q9EQS0                                                          |
| 2493 | 1,2,5,33,3 3,4,6,7,8,3<br>4,35,38,39 6,37,40 | 6 P11598,P19132,P22273,P97829,Q63617,Q99041                                     |
| 2494 | 1,2,5,33,3 3,4,6,7,8,3<br>4,35,38,40 6,37,39 | 8 P01039,P11598,P22273,P22282,P63029,P97829,Q5M8C6,Q63617                       |
| 2495 | 1,2,5,33,3 3,4,6,7,8,3<br>4,35,39,40 6,37,38 | 8 O70417,P09656,P11598,P22273,P35280,Q63617,Q99041,Q9EQS0                       |
| 2496 | 1,2,5,33,3 3,4,6,7,8,3<br>4,36,37,38 5,39,40 | 3 P22273,P36860,Q99041                                                          |
| 2497 | 1,2,5,33,3 3,4,6,7,8,3<br>4,36,37,39 5,38,40 | 3 O70417,P35280,Q99041                                                          |
| 2498 | 1,2,5,33,3 3,4,6,7,8,3<br>4,36,37,40 5,38,39 | 5 O70417,P35280,P36860,Q5QE79,Q9EQS0                                            |
| 2499 | 1,2,5,33,3 3,4,6,7,8,3<br>4,36,38,39 5,37,40 | 5 P19132,P22273,P36860,Q63617,Q99041                                            |
| 2500 | 1,2,5,33,3 3,4,6,7,8,3<br>4,36,38,40 5,37,39 | 8 P01039,P22273,P22282,P36860,P63029,Q03191,Q63617,Q99041                       |
| 2501 | 1,2,5,33,3 3,4,6,7,8,3<br>4,36,39,40 5,37,38 | 8 O70417,P19218,P22273,P35280,P36860,Q63617,Q99041,Q9EQS0                       |
| 2502 | 1,2,5,33,3 3,4,6,7,8,3<br>4,37,38,39 5,36,40 | 6 O70417,P02793,Q7TP54,P19132,Q6AY61,Q99041,Q99376                              |
| 2503 | 1,2,5,33,3 3,4,6,7,8,3<br>4,37,38,40 5,36,39 | 3 P14173,Q62714,Q6AY61                                                          |
| 2504 | 1,2,5,33,3 3,4,6,7,8,3<br>4,37,39,40 5,36,38 | 5 O70417,P19218,P35280,Q6AY61,Q99041                                            |
| 2505 | 1,2,5,33,3 3,4,6,7,8,3<br>4,38,39,40 5,36,37 | 11 P01039,P09656,P19132,P22273,P22282,P36860,P55091,P97829,P97840,Q63617,Q99041 |
| 2506 | 1,2,5,33,3 3,4,6,7,8,3<br>5,36,37,38 4,39,40 | 4 F1M3L7,P14173,P22273,Q68G31                                                   |
| 2507 | 1,2,5,33,3 3,4,6,7,8,3<br>5,36,37,39 4,38,40 | 5 F1M3L7,O70417,P23739,P35280,Q99041                                            |
| 2508 | 1,2,5,33,3 3,4,6,7,8,3<br>5,36,37,40 4,38,39 | 5 F1M3L7,O70417,P35280,Q9EQS0,Q9Z0V6                                            |

|      |                                              |    |                                                                                     |
|------|----------------------------------------------|----|-------------------------------------------------------------------------------------|
| 2509 | 1,2,5,33,3 3,4,6,7,8,3<br>5,36,38,39 4,37,40 | 10 | P11598,P22273,P22282,P23739,P49134,Q03191,Q63617,Q923V8,Q99041,Q9QW07               |
| 2510 | 1,2,5,33,3 3,4,6,7,8,3<br>5,36,38,40 4,37,39 | 7  | P11598,P22273,P22282,P49134,P63029,Q03191,Q63617                                    |
| 2511 | 1,2,5,33,3 3,4,6,7,8,3<br>5,36,39,40 4,37,38 | 10 | O70417,P11598,P22273,P22282,P23739,P35280,P49134,Q63617,Q99041,Q9EQS0               |
| 2512 | 1,2,5,33,3 3,4,6,7,8,3<br>5,37,38,39 4,36,40 | 2  | O70417,Q68G31                                                                       |
| 2513 | 1,2,5,33,3 3,4,6,7,8,3<br>5,37,38,40 4,36,39 | 4  | P08649,P14173,Q68G31,Q9Z1F2                                                         |
| 2514 | 1,2,5,33,3 3,4,6,7,8,3<br>5,37,39,40 4,36,38 | 5  | O70417,P02625,P35280,Q68G31,Q9EQS0                                                  |
| 2515 | 1,2,5,33,3 3,4,6,7,8,3<br>5,38,39,40 4,36,37 | 12 | P01039,P06761,P0C0A9,P11598,P22273,P22282,P26772,P55091,P98089,Q62635,Q63617,Q68G31 |
| 2516 | 1,2,5,33,3 3,4,6,7,8,3<br>6,37,38,39 4,35,40 | 4  | O70417,P36860,Q68G31,Q99041                                                         |
| 2517 | 1,2,5,33,3 3,4,6,7,8,3<br>6,37,38,40 4,35,39 | 5  | P14173,P36860,Q68G31,Q9Z0V6,Q9Z1F2                                                  |
| 2518 | 1,2,5,33,3 3,4,6,7,8,3<br>6,37,39,40 4,35,38 | 4  | O70417,P35280,P36860,Q99041                                                         |
| 2519 | 1,2,5,33,3 3,4,6,7,8,3<br>6,38,39,40 4,35,37 | 9  | P01039,P19132,P22273,P22282,P36860,Q03191,Q63617,Q923V8,Q99041                      |
| 2520 | 1,2,5,33,3 3,4,6,7,8,3<br>7,38,39,40 4,35,36 | 6  | O70417,P01039,P14173,P26772,P36860,Q68G31                                           |
| 2521 | 1,2,5,34,3 3,4,6,7,8,3<br>5,36,37,38 3,39,40 | 5  | D3ZTE0,F1M3L7,P14173,P22273,Q5RKI1                                                  |
| 2522 | 1,2,5,34,3 3,4,6,7,8,3<br>5,36,37,39 3,38,40 | 5  | O70417,P22273,P23739,P25031,P35280                                                  |
| 2523 | 1,2,5,34,3 3,4,6,7,8,3<br>5,36,37,40 3,38,39 | 7  | F1M3L7,O70417,P22273,P35280,P50115,Q5RKI1,Q9EQS0                                    |
| 2524 | 1,2,5,34,3 3,4,6,7,8,3<br>5,36,38,39 3,37,40 | 5  | P0C0A9,P22273,Q63617,Q99041,Q9QW07                                                  |
| 2525 | 1,2,5,34,3 3,4,6,7,8,3<br>5,36,38,40 3,37,39 | 5  | P0C0A9,P22273,P22282,Q5RKI1,Q63617                                                  |
| 2526 | 1,2,5,34,3 3,4,6,7,8,3<br>5,36,39,40 3,37,38 | 6  | O70417,P22273,P23739,P35280,Q63617,Q9EQS0                                           |
| 2527 | 1,2,5,34,3 3,4,6,7,8,3<br>5,37,38,39 3,36,40 | 1  | O70417                                                                              |
| 2528 | 1,2,5,34,3 3,4,6,7,8,3<br>5,37,38,40 3,36,39 | 2  | P14173,Q5RKI1                                                                       |

|      |                          |                          |    |                                                                                           |
|------|--------------------------|--------------------------|----|-------------------------------------------------------------------------------------------|
| 2529 | 1,2,5,34,3<br>5,37,39,40 | 3,4,6,7,8,3<br>3,36,38   | 3  | O70417,P35280,P50115                                                                      |
| 2530 | 1,2,5,34,3<br>5,38,39,40 | 3,4,6,7,8,3<br>3,36,37   | 10 | P08723,P09656,P0C0A9,P11598,P22273,P22282,P55091,P98089,Q62635,Q63617                     |
| 2531 | 1,2,5,34,3<br>6,37,38,39 | 3,4,6,7,8,3<br>3,35,40   | 3  | O70417,P22273,Q99041                                                                      |
| 2532 | 1,2,5,34,3<br>6,37,38,40 | 3,4,6,7,8,3<br>3,35,39   | 7  | D3ZTE0,O70417,P14173,P22273,P36860,Q4KLZ6,Q5RKI1                                          |
| 2533 | 1,2,5,34,3<br>6,37,39,40 | 3,4,6,7,8,3<br>3,35,38   | 2  | O70417,P35280                                                                             |
| 2534 | 1,2,5,34,3<br>6,38,39,40 | 3,4,6,7,8,3<br>3,35,37   | 5  | P0C0A9,P22273,P36860,Q63617,Q99041                                                        |
| 2535 | 1,2,5,34,3<br>7,38,39,40 | 3,4,6,7,8,3<br>3,35,36   | 3  | O70417,P14173,Q6AY61                                                                      |
| 2536 | 1,2,5,35,3<br>6,37,38,39 | 3,4,6,7,8,3<br>3,34,40   | 5  | F1M3L7,O70417,P00762,P14173,P19814                                                        |
| 2537 | 1,2,5,35,3<br>6,37,38,40 | 3,4,6,7,8,3<br>3,34,39   | 7  | D3ZTE0,F1M3L7,P14173,P19814,Q5RKI1,Q9QX74,Q9Z0V6                                          |
| 2538 | 1,2,5,35,3<br>6,37,39,40 | 3,4,6,7,8,3<br>3,34,38   | 7  | F1M3L7,O70417,P00762,P02625,P35280,P50115,Q9EQS0                                          |
| 2539 | 1,2,5,35,3<br>6,38,39,40 | 3,4,6,7,8,3<br>3,34,37   | 8  | P0C0A9,P11598,P19814,P22273,P22282,P98089,Q62635,Q63617                                   |
| 2540 | 1,2,5,35,3<br>7,38,39,40 | 3,4,6,7,8,3<br>3,34,36   | 13 | O70417,P00762,P02625,P08649,P11598,P14173,P19814,P26772,P98089,Q5I0D7,Q62635,Q99P0,Q9QX74 |
| 2541 | 1,2,5,36,3<br>7,38,39,40 | 3,4,6,7,8,3<br>3,34,35   | 5  | O70417,P00762,P14173,P36860,Q9QX74                                                        |
| 2542 | 1,2,6,7,8,3<br>3,34,35   | 3,4,5,36,3<br>7,38,39,40 | 7  | D3ZUC6,iRT-Kit_WR_fusion,O54858,O89117,P02631,P08721,Q9QX74                               |
| 2543 | 1,2,6,7,8,3<br>3,34,36   | 3,4,5,35,3<br>7,38,39,40 | 10 | iRT-Kit_WR_fusion,O89117,P02631,P08494,P08649,P08721,Q63751,Q91ZS3,Q99MH3,Q9QX74          |
| 2544 | 1,2,6,7,8,3<br>3,34,37   | 3,4,5,35,3<br>6,38,39,40 | 6  | iRT-Kit_WR_fusion,O89117,P02631,Q63751,Q9JHB9,Q9QW07                                      |
| 2545 | 1,2,6,7,8,3<br>3,34,38   | 3,4,5,35,3<br>6,37,39,40 | 7  | iRT-Kit_WR_fusion,O54800,Q5DWW2,O89117,P02631,P80299,Q30KJ2,Q6IG05                        |
| 2546 | 1,2,6,7,8,3<br>3,34,39   | 3,4,5,35,3<br>6,37,38,40 | 7  | iRT-Kit_WR_fusion,P02631,P02651,P21674,Q62894,Q99MH3,Q9Z0V6                               |
| 2547 | 1,2,6,7,8,3<br>3,34,40   | 3,4,5,35,3<br>6,37,38,39 | 7  | iRT-Kit_WR_fusion,O54858,O89117,P02631,P15399,P97580,Q30KJ2                               |
| 2548 | 1,2,6,7,8,3<br>3,35,36   | 3,4,5,34,3<br>7,38,39,40 | 3  | iRT-Kit_WR_fusion,O89117,P08721                                                           |



|      |                        |                          |                                                               |
|------|------------------------|--------------------------|---------------------------------------------------------------|
| 2549 | 1,2,6,7,8,3<br>3,35,37 | 3,4,5,34,3<br>6,38,39,40 | 1 O89117                                                      |
| 2550 | 1,2,6,7,8,3<br>3,35,38 | 3,4,5,34,3<br>6,37,39,40 | 2 iRT-Kit_WR_fusion,Q68G31                                    |
| 2551 | 1,2,6,7,8,3<br>3,35,39 | 3,4,5,34,3<br>6,37,38,40 | 2 P29315,Q4KLZ6                                               |
| 2552 | 1,2,6,7,8,3<br>3,35,40 | 3,4,5,34,3<br>6,37,38,39 | 1 P29315                                                      |
| 2553 | 1,2,6,7,8,3<br>3,36,37 | 3,4,5,34,3<br>5,38,39,40 | 4 P08723,P12020,Q63751,Q9JI85                                 |
| 2554 | 1,2,6,7,8,3<br>3,36,38 | 3,4,5,34,3<br>5,37,39,40 | 2 iRT-Kit_WR_fusion,P50115                                    |
| 2555 | 1,2,6,7,8,3<br>3,36,39 | 3,4,5,34,3<br>5,37,38,40 | 1 Q99MH3                                                      |
| 2556 | 1,2,6,7,8,3<br>3,36,40 | 3,4,5,34,3<br>5,37,38,39 | 2 iRT-Kit_WR_fusion,P12020                                    |
| 2557 | 1,2,6,7,8,3<br>3,37,38 | 3,4,5,34,3<br>5,36,39,40 | 4 iRT-Kit_WR_fusion,P02631,P12020,Q68G31                      |
| 2558 | 1,2,6,7,8,3<br>3,37,39 | 3,4,5,34,3<br>5,36,38,40 | 3 P02631,P21674,Q6AYQ8                                        |
| 2559 | 1,2,6,7,8,3<br>3,37,40 | 3,4,5,34,3<br>5,36,38,39 | 6 P02631,P12020,P21674,P30120,Q5GRG2,Q9QW07                   |
| 2560 | 1,2,6,7,8,3<br>3,38,39 | 3,4,5,34,3<br>5,36,37,40 | 1 P50115                                                      |
| 2561 | 1,2,6,7,8,3<br>3,38,40 | 3,4,5,34,3<br>5,36,37,39 | 4 iRT-Kit_WR_fusion,P01039,P02631,P25031                      |
| 2562 | 1,2,6,7,8,3<br>3,39,40 | 3,4,5,34,3<br>5,36,37,38 | 3 P02631,P21674,P29315                                        |
| 2563 | 1,2,6,7,8,3<br>4,35,36 | 3,4,5,33,3<br>7,38,39,40 | 3 iRT-Kit_WR_fusion,P50280,Q9Z1F2                             |
| 2564 | 1,2,6,7,8,3<br>4,35,37 | 3,4,5,33,3<br>6,38,39,40 | 1 Q66H69                                                      |
| 2565 | 1,2,6,7,8,3<br>4,35,38 | 3,4,5,33,3<br>6,37,39,40 | 4 iRT-Kit_WR_fusion,P25809,P97580,Q30KJ2                      |
| 2566 | 1,2,6,7,8,3<br>4,35,39 | 3,4,5,33,3<br>6,37,38,40 | 3 Q30KJ2,Q9Z0V6,Q9Z1F2                                        |
| 2567 | 1,2,6,7,8,3<br>4,35,40 | 3,4,5,33,3<br>6,37,38,39 | 5 iRT-Kit_WR_fusion,P15399,P50280,P97580,Q30KJ2               |
| 2568 | 1,2,6,7,8,3<br>4,36,37 | 3,4,5,33,3<br>5,38,39,40 | 7 iRT-Kit_WR_fusion,P01835,P12020,P62804,P69897,Q66H69,Q9JI85 |

|      |                        |                          |                                                                          |
|------|------------------------|--------------------------|--------------------------------------------------------------------------|
| 2569 | 1,2,6,7,8,3<br>4,36,38 | 3,4,5,33,3<br>5,37,39,40 | 3 iRT-Kit_WR_fusion,P12020,Q91ZS3                                        |
| 2570 | 1,2,6,7,8,3<br>4,36,39 | 3,4,5,33,3<br>5,37,38,40 | 3 P08649,Q9Z0V6,Q9Z1F2                                                   |
| 2571 | 1,2,6,7,8,3<br>4,36,40 | 3,4,5,33,3<br>5,37,38,39 | 4 iRT-Kit_WR_fusion,P12020,P15399,P97580                                 |
| 2572 | 1,2,6,7,8,3<br>4,37,38 | 3,4,5,33,3<br>5,36,39,40 | 5 iRT-Kit_WR_fusion,P01835,P12020,P62804,Q6IG05                          |
| 2573 | 1,2,6,7,8,3<br>4,37,39 | 3,4,5,33,3<br>5,36,38,40 | 3 P01835,P21674,Q9Z0V6                                                   |
| 2574 | 1,2,6,7,8,3<br>4,37,40 | 3,4,5,33,3<br>5,36,38,39 | 10 P01835,P02631,P12020,P13432,P15399,P62804,P97580,Q5GRG2,Q66H69,Q9QW07 |
| 2575 | 1,2,6,7,8,3<br>4,38,39 | 3,4,5,33,3<br>5,36,37,40 | 4 iRT-Kit_WR_fusion,P97580,Q30KJ2,Q9Z0V6                                 |
| 2576 | 1,2,6,7,8,3<br>4,38,40 | 3,4,5,33,3<br>5,36,37,39 | 6 iRT-Kit_WR_fusion,P01835,P12020,P15399,P97580,Q30KJ2                   |
| 2577 | 1,2,6,7,8,3<br>4,39,40 | 3,4,5,33,3<br>5,36,37,38 | 5 P15399,P21674,P97580,Q30KJ2,Q9Z0V6                                     |
| 2578 | 1,2,6,7,8,3<br>5,36,37 | 3,4,5,33,3<br>4,38,39,40 | 4 P19132,P19218,Q66H69,Q9JI85                                            |
| 2579 | 1,2,6,7,8,3<br>5,36,38 | 3,4,5,33,3<br>4,37,39,40 | 3 iRT-Kit_WR_fusion,P19218,P19814                                        |
| 2580 | 1,2,6,7,8,3<br>5,36,39 | 3,4,5,33,3<br>4,37,38,40 | 1 Q9Z1F2                                                                 |
| 2581 | 1,2,6,7,8,3<br>5,36,40 | 3,4,5,33,3<br>4,37,38,39 | 1 P02793;Q7TP54                                                          |
| 2582 | 1,2,6,7,8,3<br>5,37,38 | 3,4,5,33,3<br>4,36,39,40 | 2 P19218,P19814                                                          |
| 2583 | 1,2,6,7,8,3<br>5,37,39 | 3,4,5,33,3<br>4,36,38,40 | 1 P00762                                                                 |
| 2584 | 1,2,6,7,8,3<br>5,37,40 | 3,4,5,33,3<br>4,36,38,39 | 4 P00762,Q5GRG2,Q99041,Q9QW07                                            |
| 2585 | 1,2,6,7,8,3<br>5,38,39 | 3,4,5,33,3<br>4,36,37,40 | 2 P19814,Q5EGZ1                                                          |
| 2586 | 1,2,6,7,8,3<br>5,38,40 | 3,4,5,33,3<br>4,36,37,39 | 5 P19814,P98089,Q5EGZ1,Q62635,Q62812                                     |
| 2587 | 1,2,6,7,8,3<br>5,39,40 | 3,4,5,33,3<br>4,36,37,38 | 2 P29315,Q5EGZ1                                                          |
| 2588 | 1,2,6,7,8,3<br>6,37,38 | 3,4,5,33,3<br>4,35,39,40 | 7 P01835,P06911,P12020,P19218,Q5GRG2,Q63474,Q9JI85                       |

|      |                         |                          |   |                                                                |
|------|-------------------------|--------------------------|---|----------------------------------------------------------------|
| 2589 | 1,2,6,7,8,3<br>6,37,39  | 3,4,5,33,3<br>4,35,38,40 | 6 | P00762,P01835,P06911,P12020,Q5GRG2,Q812E4                      |
| 2590 | 1,2,6,7,8,3<br>6,37,40  | 3,4,5,33,3<br>4,35,38,39 | 9 | P00762,P01835,P06911,P12020,P19629,Q5GRG2,Q66H69,Q9JI85,Q9QW07 |
| 2591 | 1,2,6,7,8,3<br>6,38,39  | 3,4,5,33,3<br>4,35,37,40 | 1 | P12020                                                         |
| 2592 | 1,2,6,7,8,3<br>6,38,40  | 3,4,5,33,3<br>4,35,37,39 | 4 | iRT-Kit_WR_fusion,P06911,P12020,Q5GRG2                         |
| 2593 | 1,2,6,7,8,3<br>6,39,40  | 3,4,5,33,3<br>4,35,37,38 | 4 | B0BNN3,P06911,P12020,Q5GRG2                                    |
| 2594 | 1,2,6,7,8,3<br>7,38,39  | 3,4,5,33,3<br>4,35,36,40 | 3 | P01835,P12020,Q5GRG2                                           |
| 2595 | 1,2,6,7,8,3<br>7,38,40  | 3,4,5,33,3<br>4,35,36,39 | 5 | P01835,P06911,P12020,Q5GRG2,Q9QW07                             |
| 2596 | 1,2,6,7,8,3<br>7,39,40  | 3,4,5,33,3<br>4,35,36,38 | 8 | P00762,P01835,P06911,P12020,P19629,P21674,Q5GRG2,Q9QW07        |
| 2597 | 1,2,6,7,8,3<br>8,39,40  | 3,4,5,33,3<br>4,35,36,37 | 9 | P01835,P12020,P51740,P55091,P97840,Q5GRG2,Q5I0D7,Q62635,Q6PCU2 |
| 2598 | 1,2,6,7,33,<br>34,35,36 | 3,4,5,8,37,<br>38,39,40  | 8 | D3ZUC6,O89117,P08494,P08721,P80299,Q99MH3,Q9EQS0,Q9R168        |
| 2599 | 1,2,6,7,33,<br>34,35,37 | 3,4,5,8,36,<br>38,39,40  | 3 | D3ZUC6,O89117,Q9R168                                           |
| 2600 | 1,2,6,7,33,<br>34,35,38 | 3,4,5,8,36,<br>37,39,40  | 7 | D3ZUC6,O54800,Q5DWV2,O89117,P08721,P80299,P97829,Q9R168        |
| 2601 | 1,2,6,7,33,<br>34,35,39 | 3,4,5,8,36,<br>37,38,40  | 1 | D3ZUC6                                                         |
| 2602 | 1,2,6,7,33,<br>34,35,40 | 3,4,5,8,36,<br>37,38,39  | 4 | D3ZUC6,O89117,Q9EQS0,Q9R168                                    |
| 2603 | 1,2,6,7,33,<br>34,36,37 | 3,4,5,8,35,<br>38,39,40  | 8 | D3ZUC6,O89117,P00774,P08721,P08723,P98089,Q63751,Q9R168        |
| 2604 | 1,2,6,7,33,<br>34,36,38 | 3,4,5,8,35,<br>37,39,40  | 4 | D3ZUC6,P08721,P80299,Q9R168                                    |
| 2605 | 1,2,6,7,33,<br>34,36,39 | 3,4,5,8,35,<br>37,38,40  | 5 | D3ZUC6,P08494,P08721,P80299,Q99MH3                             |
| 2606 | 1,2,6,7,33,<br>34,36,40 | 3,4,5,8,35,<br>37,38,39  | 5 | D3ZUC6,P08494,P08721,P80299,Q9EQS0                             |
| 2607 | 1,2,6,7,33,<br>34,37,38 | 3,4,5,8,35,<br>36,39,40  | 4 | P01835,P80299,Q6AY61,Q9R168                                    |
| 2608 | 1,2,6,7,33,<br>34,37,39 | 3,4,5,8,35,<br>36,38,40  | 3 | P01835,P21674,Q6AYQ8                                           |

|      |                                              |                                             |
|------|----------------------------------------------|---------------------------------------------|
| 2609 | 1,2,6,7,33, 3,4,5,8,35,<br>34,37,40 36,38,39 | 4 P01835,Q62714,Q9QW07,Q9R168               |
| 2610 | 1,2,6,7,33, 3,4,5,8,35,<br>34,38,39 36,37,40 | 2 P19132,P80299                             |
| 2611 | 1,2,6,7,33, 3,4,5,8,35,<br>34,38,40 36,37,39 | 6 P01039,P50116,P63029,P80299,Q62714,Q9R168 |
| 2612 | 1,2,6,7,33, 3,4,5,8,35,<br>34,39,40 36,37,38 | 3 P01039,P19218,P21674                      |
| 2613 | 1,2,6,7,33, 3,4,5,8,34,<br>35,36,37 38,39,40 | 4 P00762,P12368,Q9EQS0,Q9R168               |
| 2614 | 1,2,6,7,33, 3,4,5,8,34,<br>35,36,38 37,39,40 | 4 P08721,P49134,Q923V8,Q9R168               |
| 2615 | 1,2,6,7,33, 3,4,5,8,34,<br>35,36,39 37,38,40 | 2 P49134,Q9EQS0                             |
| 2616 | 1,2,6,7,33, 3,4,5,8,34,<br>35,36,40 37,38,39 | 1 Q9EQS0                                    |
| 2617 | 1,2,6,7,33, 3,4,5,8,34,<br>35,37,38 36,39,40 | 3 P14173,Q68G31,Q9R168                      |
| 2618 | 1,2,6,7,33, 3,4,5,8,34,<br>35,37,39 36,38,40 | 2 P00762,Q68G31                             |
| 2619 | 1,2,6,7,33, 3,4,5,8,34,<br>35,37,40 36,38,39 | 3 P00762,Q68G31,Q9EQS0                      |
| 2620 | 1,2,6,7,33, 3,4,5,8,34,<br>35,38,39 36,37,40 | 2 P49134,Q68G31                             |
| 2621 | 1,2,6,7,33, 3,4,5,8,34,<br>35,38,40 36,37,39 | 5 P01039,P63029,Q62812,Q68G31,Q9R168        |
| 2622 | 1,2,6,7,33, 3,4,5,8,34,<br>35,39,40 36,37,38 | 3 P00762,P29315,Q9EQS0                      |
| 2623 | 1,2,6,7,33, 3,4,5,8,34,<br>36,37,38 35,39,40 | 5 P01835,P14173,P36860,Q68G31,Q9R168        |
| 2624 | 1,2,6,7,33, 3,4,5,8,34,<br>36,37,39 35,38,40 | 1 P00762                                    |
| 2625 | 1,2,6,7,33, 3,4,5,8,34,<br>36,37,40 35,38,39 | 5 P00762,P01835,P19629,Q5GRG2,Q9EQS0        |
| 2626 | 1,2,6,7,33, 3,4,5,8,34,<br>36,38,39 35,37,40 | 2 P36860,Q923V8                             |
| 2627 | 1,2,6,7,33, 3,4,5,8,34,<br>36,38,40 35,37,39 | 2 P01039,P36860                             |
| 2628 | 1,2,6,7,33, 3,4,5,8,34,<br>36,39,40 35,37,38 | 3 P00762,P36860,Q9EQS0                      |

|      |                                              |                                                           |
|------|----------------------------------------------|-----------------------------------------------------------|
| 2629 | 1,2,6,7,33, 3,4,5,8,34,<br>37,38,39 35,36,40 | 3 P00762,P01835,Q68G31                                    |
| 2630 | 1,2,6,7,33, 3,4,5,8,34,<br>37,38,40 35,36,39 | 8 P00762,P01039,P01835,P14173,P23739,Q5GRG2,Q62714,Q68G31 |
| 2631 | 1,2,6,7,33, 3,4,5,8,34,<br>37,39,40 35,36,38 | 3 P00762,P01835,P21674                                    |
| 2632 | 1,2,6,7,33, 3,4,5,8,34,<br>38,39,40 35,36,37 | 4 P01039,P51740,P55091,P97840                             |
| 2633 | 1,2,6,7,34, 3,4,5,8,33,<br>35,36,37 38,39,40 | 2 P01835,Q9R168                                           |
| 2634 | 1,2,6,7,34, 3,4,5,8,33,<br>35,36,38 37,39,40 | 3 P80299,Q9QWN8,Q9R168                                    |
| 2635 | 1,2,6,7,34, 3,4,5,8,33,<br>35,36,39 37,38,40 | 1 Q9Z1F2                                                  |
| 2636 | 1,2,6,7,34, 3,4,5,8,33,<br>35,36,40 37,38,39 | 1 Q9EQS0                                                  |
| 2637 | 1,2,6,7,34, 3,4,5,8,33,<br>35,37,38 36,39,40 | 4 P01681,P01835,P14173,Q9R168                             |
| 2638 | 1,2,6,7,34, 3,4,5,8,33,<br>35,37,39 36,38,40 | 2 P01681,P01835                                           |
| 2639 | 1,2,6,7,34, 3,4,5,8,33,<br>35,37,40 36,38,39 | 2 P01835,Q9EQS0                                           |
| 2640 | 1,2,6,7,34, 3,4,5,8,33,<br>35,38,39 36,37,40 | 0                                                         |
| 2641 | 1,2,6,7,34, 3,4,5,8,33,<br>35,38,40 36,37,39 | 2 Q62812,Q9R168                                           |
| 2642 | 1,2,6,7,34, 3,4,5,8,33,<br>35,39,40 36,37,38 | 1 Q9EQS0                                                  |
| 2643 | 1,2,6,7,34, 3,4,5,8,33,<br>36,37,38 35,39,40 | 3 P01835,P14173,Q9R168                                    |
| 2644 | 1,2,6,7,34, 3,4,5,8,33,<br>36,37,39 35,38,40 | 2 O70417,P01835                                           |
| 2645 | 1,2,6,7,34, 3,4,5,8,33,<br>36,37,40 35,38,39 | 2 P01835,P19629                                           |
| 2646 | 1,2,6,7,34, 3,4,5,8,33,<br>36,38,39 35,37,40 | 1 P01835                                                  |
| 2647 | 1,2,6,7,34, 3,4,5,8,33,<br>36,38,40 35,37,39 | 1 P01835                                                  |
| 2648 | 1,2,6,7,34, 3,4,5,8,33,<br>36,39,40 35,37,38 | 1 P01835                                                  |

|      |                                              |                                                                          |
|------|----------------------------------------------|--------------------------------------------------------------------------|
| 2649 | 1,2,6,7,34, 3,4,5,8,33,<br>37,38,39 35,36,40 | 3 P01681,P01835,Q6AY61                                                   |
| 2650 | 1,2,6,7,34, 3,4,5,8,33,<br>37,38,40 35,36,39 | 6 P01835,P14173,P20767,P23739,Q62714,Q6AY61                              |
| 2651 | 1,2,6,7,34, 3,4,5,8,33,<br>37,39,40 35,36,38 | 4 O70417,P01835,P21674,Q6AY61                                            |
| 2652 | 1,2,6,7,34, 3,4,5,8,33,<br>38,39,40 35,36,37 | 4 P01835,P51740,P55091,P97840                                            |
| 2653 | 1,2,6,7,35, 3,4,5,8,33,<br>36,37,38 34,39,40 | 5 P00762,P01835,P14173,P19218,P19814                                     |
| 2654 | 1,2,6,7,35, 3,4,5,8,33,<br>36,37,39 34,38,40 | 2 P00762,P01835                                                          |
| 2655 | 1,2,6,7,35, 3,4,5,8,33,<br>36,37,40 34,38,39 | 5 P00762,P01835,P02793;Q7TP54,P19132,Q9EQS0                              |
| 2656 | 1,2,6,7,35, 3,4,5,8,33,<br>36,38,39 34,37,40 | 2 P00762,P19814                                                          |
| 2657 | 1,2,6,7,35, 3,4,5,8,33,<br>36,38,40 34,37,39 | 4 P00762,P02793;Q7TP54,P19814,Q62812                                     |
| 2658 | 1,2,6,7,35, 3,4,5,8,33,<br>36,39,40 34,37,38 | 2 P00762,Q9EQS0                                                          |
| 2659 | 1,2,6,7,35, 3,4,5,8,33,<br>37,38,39 34,36,40 | 4 P00762,P01835,P14173,P19814                                            |
| 2660 | 1,2,6,7,35, 3,4,5,8,33,<br>37,38,40 34,36,39 | 5 P00762,P01835,P14173,P19814,P26772                                     |
| 2661 | 1,2,6,7,35, 3,4,5,8,33,<br>37,39,40 34,36,38 | 4 P00762,P01835,P02625,P26772                                            |
| 2662 | 1,2,6,7,35, 3,4,5,8,33,<br>38,39,40 34,36,37 | 9 P00762,P06760,P19814,P26772,P51740,P55091,P98089,Q5EGZ1,Q62635         |
| 2663 | 1,2,6,7,36, 3,4,5,8,33,<br>37,38,39 34,35,40 | 4 P00762,P01835,P14173,Q63474                                            |
| 2664 | 1,2,6,7,36, 3,4,5,8,33,<br>37,38,40 34,35,39 | 6 P00762,P01835,P14173,P19629,Q5GRG2,Q63474                              |
| 2665 | 1,2,6,7,36, 3,4,5,8,33,<br>37,39,40 34,35,38 | 5 O70417,P00762,P01835,P19629,Q5GRG2                                     |
| 2666 | 1,2,6,7,36, 3,4,5,8,33,<br>38,39,40 34,35,37 | 5 P00762,P01835,P36860,P51740,P55091                                     |
| 2667 | 1,2,6,7,37, 3,4,5,8,33,<br>38,39,40 34,35,36 | 10 P00762,P01835,P14173,P19629,P26772,P51740,P55091,Q5GRG2,Q5I0D7,Q9QX74 |
| 2668 | 1,2,6,8,33, 3,4,5,7,37,<br>34,35,36 38,39,40 | 6 D3ZUC6,O89117,P08494,P08649,Q5QE79,Q99MH3                              |

|      |                                              |                                                                  |
|------|----------------------------------------------|------------------------------------------------------------------|
| 2669 | 1,2,6,8,33, 3,4,5,7,36,<br>34,35,37 38,39,40 | 2 D3ZUC6,O89117                                                  |
| 2670 | 1,2,6,8,33, 3,4,5,7,36,<br>34,35,38 37,39,40 | 7 D3ZUC6,O89117,P25809,P63029,P97580,Q30KJ2,Q68G31               |
| 2671 | 1,2,6,8,33, 3,4,5,7,36,<br>34,35,39 37,38,40 | 5 D3ZUC6,O89117,P97840,Q30KJ2,Q99MH3                             |
| 2672 | 1,2,6,8,33, 3,4,5,7,36,<br>34,35,40 37,38,39 | 5 D3ZUC6,O89117,P15399,P97580,Q30KJ2                             |
| 2673 | 1,2,6,8,33, 3,4,5,7,35,<br>34,36,37 38,39,40 | 9 D3ZUC6,O89117,P08649,P08723,P13432,Q5QE79,Q63751,Q99MH3,Q9JI85 |
| 2674 | 1,2,6,8,33, 3,4,5,7,35,<br>34,36,38 37,39,40 | 5 D3ZUC6,O89117,P08494,P08649,Q99MH3                             |
| 2675 | 1,2,6,8,33, 3,4,5,7,35,<br>34,36,39 37,38,40 | 4 D3ZUC6,P08494,P08649,Q99MH3                                    |
| 2676 | 1,2,6,8,33, 3,4,5,7,35,<br>34,36,40 37,38,39 | 8 D3ZUC6,O89117,P08494,P08649,P13432,P15399,P97580,Q99MH3        |
| 2677 | 1,2,6,8,33, 3,4,5,7,35,<br>34,37,38 36,39,40 | 3 O89117,Q68G31,Q6IG05                                           |
| 2678 | 1,2,6,8,33, 3,4,5,7,35,<br>34,37,39 36,38,40 | 4 P02793;Q7TP54,P21674,Q99MH3,Q9QWN8                             |
| 2679 | 1,2,6,8,33, 3,4,5,7,35,<br>34,37,40 36,38,39 | 7 O89117,P13432,P15399,P30120,P97580,Q9QW07,Q9QWN8               |
| 2680 | 1,2,6,8,33, 3,4,5,7,35,<br>34,38,39 36,37,40 | 8 P02793;Q7TP54,P15399,P19132,P97580,P97840,Q30KJ2,Q63532,Q99MH3 |
| 2681 | 1,2,6,8,33, 3,4,5,7,35,<br>34,38,40 36,37,39 | 7 P01039,P15399,P25031,P63029,P97580,P97840,Q30KJ2               |
| 2682 | 1,2,6,8,33, 3,4,5,7,35,<br>34,39,40 36,37,38 | 7 P15399,P21674,P47967,P97580,P97840,Q30KJ2,Q99MH3               |
| 2683 | 1,2,6,8,33, 3,4,5,7,34,<br>35,36,37 38,39,40 | 5 O89117,P08723,P12368,Q68G31,Q9JI85                             |
| 2684 | 1,2,6,8,33, 3,4,5,7,34,<br>35,36,38 37,39,40 | 3 O89117,P49134,Q68G31                                           |
| 2685 | 1,2,6,8,33, 3,4,5,7,34,<br>35,36,39 37,38,40 | 3 P49134,Q68G31,Q99MH3                                           |
| 2686 | 1,2,6,8,33, 3,4,5,7,34,<br>35,36,40 37,38,39 | 1 Q68G31                                                         |
| 2687 | 1,2,6,8,33, 3,4,5,7,34,<br>35,37,38 36,39,40 | 2 O89117,Q68G31                                                  |
| 2688 | 1,2,6,8,33, 3,4,5,7,34,<br>35,37,39 36,38,40 | 2 Q68G31,Q9QWN8                                                  |

|      |                                              |                                                                          |
|------|----------------------------------------------|--------------------------------------------------------------------------|
| 2689 | 1,2,6,8,33, 3,4,5,7,34,<br>35,37,40 36,38,39 | 2 Q68G31,Q9QW07                                                          |
| 2690 | 1,2,6,8,33, 3,4,5,7,34,<br>35,38,39 36,37,40 | 2 P97840,Q68G31                                                          |
| 2691 | 1,2,6,8,33, 3,4,5,7,34,<br>35,38,40 36,37,39 | 5 P01039,P63029,P97840,Q62635,Q68G31                                     |
| 2692 | 1,2,6,8,33, 3,4,5,7,34,<br>35,39,40 36,37,38 | 4 P29315,P47967,P97840,Q68G31                                            |
| 2693 | 1,2,6,8,33, 3,4,5,7,34,<br>36,37,38 35,39,40 | 5 P08723,P12020,Q5GRG2,Q63474,Q68G31                                     |
| 2694 | 1,2,6,8,33, 3,4,5,7,34,<br>36,37,39 35,38,40 | 2 Q68G31,Q99MH3                                                          |
| 2695 | 1,2,6,8,33, 3,4,5,7,34,<br>36,37,40 35,38,39 | 9 P06911,P08723,P12020,P13432,P19629,P30120,Q5GRG2,Q68G31,Q9QW07         |
| 2696 | 1,2,6,8,33, 3,4,5,7,34,<br>36,38,39 35,37,40 | 2 Q68G31,Q99MH3                                                          |
| 2697 | 1,2,6,8,33, 3,4,5,7,34,<br>36,38,40 35,37,39 | 4 P12020,P63029,Q5GRG2,Q68G31                                            |
| 2698 | 1,2,6,8,33, 3,4,5,7,34,<br>36,39,40 35,37,38 | 3 P97840,Q68G31,Q99MH3                                                   |
| 2699 | 1,2,6,8,33, 3,4,5,7,34,<br>37,38,39 35,36,40 | 3 P97840,Q68G31,Q9QWN8                                                   |
| 2700 | 1,2,6,8,33, 3,4,5,7,34,<br>37,38,40 35,36,39 | 3 P12020,Q5GRG2,Q68G31                                                   |
| 2701 | 1,2,6,8,33, 3,4,5,7,34,<br>37,39,40 35,36,38 | 7 P21674,P47967,P97840,Q5GRG2,Q68G31,Q9QW07,Q9QWN8                       |
| 2702 | 1,2,6,8,33, 3,4,5,7,34,<br>38,39,40 35,36,37 | 10 P01039,P19132,P25031,P47967,P51740,P55091,P97840,Q5I0D1,Q62635,Q68G31 |
| 2703 | 1,2,6,8,34, 3,4,5,7,33,<br>35,36,37 38,39,40 | 2 Q5RKI1,Q9JI85                                                          |
| 2704 | 1,2,6,8,34, 3,4,5,7,33,<br>35,36,38 37,39,40 | 3 P97580,Q30KJ2,Q5RKI1                                                   |
| 2705 | 1,2,6,8,34, 3,4,5,7,33,<br>35,36,39 37,38,40 | 2 P08649,Q9Z1F2                                                          |
| 2706 | 1,2,6,8,34, 3,4,5,7,33,<br>35,36,40 37,38,39 | 5 P15399,P50280,P97580,Q30KJ2,Q5RKI1                                     |
| 2707 | 1,2,6,8,34, 3,4,5,7,33,<br>35,37,38 36,39,40 | 4 P25809,P97580,Q30KJ2,Q5RKI1                                            |
| 2708 | 1,2,6,8,34, 3,4,5,7,33,<br>35,37,39 36,38,40 | 1 P25809                                                                 |



|      |                                              |                                                                  |
|------|----------------------------------------------|------------------------------------------------------------------|
| 2709 | 1,2,6,8,34, 3,4,5,7,33,<br>35,37,40 36,38,39 | 6 P13432,P15399,P97580,Q30KJ2,Q5RKI1,Q9QW07                      |
| 2710 | 1,2,6,8,34, 3,4,5,7,33,<br>35,38,39 36,37,40 | 5 P15399,P25809,P97580,P97840,Q30KJ2                             |
| 2711 | 1,2,6,8,34, 3,4,5,7,33,<br>35,38,40 36,37,39 | 6 P15399,P97580,P97840,Q30KJ2,Q5RKI1,Q62635                      |
| 2712 | 1,2,6,8,34, 3,4,5,7,33,<br>35,39,40 36,37,38 | 5 P15399,P47967,P97580,P97840,Q30KJ2                             |
| 2713 | 1,2,6,8,34, 3,4,5,7,33,<br>36,37,38 35,39,40 | 4 P12020,Q5RKI1,Q63474,Q9JI85                                    |
| 2714 | 1,2,6,8,34, 3,4,5,7,33,<br>36,37,39 35,38,40 | 2 P12020,Q9JI85                                                  |
| 2715 | 1,2,6,8,34, 3,4,5,7,33,<br>36,37,40 35,38,39 | 9 P12020,P13432,P15399,P19629,P97580,Q5GRG2,Q5RKI1,Q9JI85,Q9QW07 |
| 2716 | 1,2,6,8,34, 3,4,5,7,33,<br>36,38,39 35,37,40 | 3 P15399,P97580,Q30KJ2                                           |
| 2717 | 1,2,6,8,34, 3,4,5,7,33,<br>36,38,40 35,37,39 | 5 P12020,P15399,P97580,Q30KJ2,Q5RKI1                             |
| 2718 | 1,2,6,8,34, 3,4,5,7,33,<br>36,39,40 35,37,38 | 5 P13432,P15399,P97580,P97840,Q30KJ2                             |
| 2719 | 1,2,6,8,34, 3,4,5,7,33,<br>37,38,39 35,36,40 | 4 P15399,P97580,P97840,Q30KJ2                                    |
| 2720 | 1,2,6,8,34, 3,4,5,7,33,<br>37,38,40 35,36,39 | 7 P01835,P12020,P15399,P97580,Q30KJ2,Q5GRG2,Q5RKI1               |
| 2721 | 1,2,6,8,34, 3,4,5,7,33,<br>37,39,40 35,36,38 | 8 P12020,P13432,P15399,P21674,P97580,P97840,Q30KJ2,Q5GRG2        |
| 2722 | 1,2,6,8,34, 3,4,5,7,33,<br>38,39,40 35,36,37 | 8 P15399,P47967,P51740,P55091,P97580,P97840,Q30KJ2,Q62635        |
| 2723 | 1,2,6,8,35, 3,4,5,7,33,<br>36,37,38 34,39,40 | 4 P19218,P19814,Q5RKI1,Q68G31                                    |
| 2724 | 1,2,6,8,35, 3,4,5,7,33,<br>36,37,39 34,38,40 | 1 Q68G31                                                         |
| 2725 | 1,2,6,8,35, 3,4,5,7,33,<br>36,37,40 34,38,39 | 6 P19629,P60905,Q5GRG2,Q5RKI1,Q6P6S4,Q9JI85                      |
| 2726 | 1,2,6,8,35, 3,4,5,7,33,<br>36,38,39 34,37,40 | 1 Q68G31                                                         |
| 2727 | 1,2,6,8,35, 3,4,5,7,33,<br>36,38,40 34,37,39 | 4 P19814,Q5RKI1,Q62635,Q68G31                                    |
| 2728 | 1,2,6,8,35, 3,4,5,7,33,<br>36,39,40 34,37,38 | 1 P54921                                                         |

|      |                                              |                                                                                        |
|------|----------------------------------------------|----------------------------------------------------------------------------------------|
| 2729 | 1,2,6,8,35, 3,4,5,7,33,<br>37,38,39 34,36,40 | 1 Q68G31                                                                               |
| 2730 | 1,2,6,8,35, 3,4,5,7,33,<br>37,38,40 34,36,39 | 5 P19814,Q5GRG2,Q5RKI1,Q62635,Q68G31                                                   |
| 2731 | 1,2,6,8,35, 3,4,5,7,33,<br>37,39,40 34,36,38 | 3 P82471,P97840,Q68G31                                                                 |
| 2732 | 1,2,6,8,35, 3,4,5,7,33,<br>38,39,40 34,36,37 | 10 P26772,P47967,P51740,P54921,P55091,P97840,P98089,Q5EGZ1,Q62635,Q68G31               |
| 2733 | 1,2,6,8,36, 3,4,5,7,33,<br>37,38,39 34,35,40 | 6 P06911,P12020,P19629,Q5GRG2,Q63474,Q68G31                                            |
| 2734 | 1,2,6,8,36, 3,4,5,7,33,<br>37,38,40 34,35,39 | 7 P06911,P12020,P19629,Q5GRG2,Q5RKI1,Q63474,Q68G31                                     |
| 2735 | 1,2,6,8,36, 3,4,5,7,33,<br>37,39,40 34,35,38 | 6 P06911,P12020,P19629,Q5GRG2,Q6P6S4,Q812E4                                            |
| 2736 | 1,2,6,8,36, 3,4,5,7,33,<br>38,39,40 34,35,37 | 8 P12020,P47967,P51740,P54921,P55091,P97840,Q5GRG2,Q62635                              |
| 2737 | 1,2,6,8,37, 3,4,5,7,33,<br>38,39,40 34,35,36 | 12 P01835,P08721,P12020,P19629,P47967,P51740,P55091,P97840,Q5GRG2,Q5I0D7,Q62635,Q68G31 |
| 2738 | 1,2,6,33,3 3,4,5,7,8,3<br>4,35,36,37 8,39,40 | 7 D3ZUC6,O89117,P35280,Q5QE79,Q6PCU2,Q9EQS0,Q9R168                                     |
| 2739 | 1,2,6,33,3 3,4,5,7,8,3<br>4,35,36,38 7,39,40 | 7 D3ZUC6,O89117,P22273,P49134,P63029,P80299,Q9R168                                     |
| 2740 | 1,2,6,33,3 3,4,5,7,8,3<br>4,35,36,39 7,38,40 | 7 D3ZUC6,P08494,P22006,P35280,P49134,Q99MH3,Q9EQS0                                     |
| 2741 | 1,2,6,33,3 3,4,5,7,8,3<br>4,35,36,40 7,38,39 | 6 D3ZUC6,O89117,P08494,P35280,Q5QE79,Q9EQS0                                            |
| 2742 | 1,2,6,33,3 3,4,5,7,8,3<br>4,35,37,38 6,39,40 | 4 D3ZUC6,O89117,Q68G31,Q9R168                                                          |
| 2743 | 1,2,6,33,3 3,4,5,7,8,3<br>4,35,37,39 6,38,40 | 4 D3ZUC6,O70417,P35280,Q68G31                                                          |
| 2744 | 1,2,6,33,3 3,4,5,7,8,3<br>4,35,37,40 6,38,39 | 5 D3ZUC6,O89117,P35280,Q68G31,Q9EQS0                                                   |
| 2745 | 1,2,6,33,3 3,4,5,7,8,3<br>4,35,38,39 6,37,40 | 5 D3ZUC6,P80299,P97829,P97840,Q68G31                                                   |
| 2746 | 1,2,6,33,3 3,4,5,7,8,3<br>4,35,38,40 6,37,39 | 8 D3ZUC6,P01039,P15399,P63029,P97829,P97840,Q68G31,Q9R168                              |
| 2747 | 1,2,6,33,3 3,4,5,7,8,3<br>4,35,39,40 6,37,38 | 5 D3ZUC6,P35280,P47967,P97840,Q9EQS0                                                   |
| 2748 | 1,2,6,33,3 3,4,5,7,8,3<br>4,36,37,38 5,39,40 | 4 D3ZUC6,Q63474,Q68G31,Q9R168                                                          |

|      |                                              |                                                                                 |
|------|----------------------------------------------|---------------------------------------------------------------------------------|
| 2749 | 1,2,6,33,3 3,4,5,7,8,3<br>4,36,37,39 5,38,40 | 4 D3ZUC6,O70417,P35280,Q99MH3                                                   |
| 2750 | 1,2,6,33,3 3,4,5,7,8,3<br>4,36,37,40 5,38,39 | 5 D3ZUC6,O70417,P19629,P35280,Q9EQS0                                            |
| 2751 | 1,2,6,33,3 3,4,5,7,8,3<br>4,36,38,39 5,37,40 | 6 D3ZUC6,P19132,P36860,P80299,Q99041,Q99MH3                                     |
| 2752 | 1,2,6,33,3 3,4,5,7,8,3<br>4,36,38,40 5,37,39 | 5 D3ZUC6,P01039,P36860,P63029,P80299                                            |
| 2753 | 1,2,6,33,3 3,4,5,7,8,3<br>4,36,39,40 5,37,38 | 7 D3ZUC6,P08494,P19218,P35280,P36860,Q99MH3,Q9EQS0                              |
| 2754 | 1,2,6,33,3 3,4,5,7,8,3<br>4,37,38,39 5,36,40 | 3 P02793;Q7TP54,P97840,Q68G31                                                   |
| 2755 | 1,2,6,33,3 3,4,5,7,8,3<br>4,37,38,40 5,36,39 | 5 P01039,P14173,P63029,Q62714,Q68G31                                            |
| 2756 | 1,2,6,33,3 3,4,5,7,8,3<br>4,37,39,40 5,36,38 | 5 O70417,P19218,P21674,P35280,P97840                                            |
| 2757 | 1,2,6,33,3 3,4,5,7,8,3<br>4,38,39,40 5,36,37 | 8 P01039,P15399,P19132,P47967,P51740,P55091,P97840,Q5I0D1                       |
| 2758 | 1,2,6,33,3 3,4,5,7,8,3<br>5,36,37,38 4,39,40 | 4 P14173,P49134,Q68G31,Q9Z0V6                                                   |
| 2759 | 1,2,6,33,3 3,4,5,7,8,3<br>5,36,37,39 4,38,40 | 5 O70417,P35280,P49134,Q68G31,Q9EQS0                                            |
| 2760 | 1,2,6,33,3 3,4,5,7,8,3<br>5,36,37,40 4,38,39 | 6 P12368,P35280,Q68G31,Q9EQS0,Q9WTT6,Q9Z0V6                                     |
| 2761 | 1,2,6,33,3 3,4,5,7,8,3<br>5,36,38,39 4,37,40 | 3 P06760,P49134,Q68G31                                                          |
| 2762 | 1,2,6,33,3 3,4,5,7,8,3<br>5,36,38,40 4,37,39 | 6 P01039,P06760,P49134,P63029,Q68G31,Q9Z0V6                                     |
| 2763 | 1,2,6,33,3 3,4,5,7,8,3<br>5,36,39,40 4,37,38 | 5 P06760,P35280,P49134,Q68G31,Q9EQS0                                            |
| 2764 | 1,2,6,33,3 3,4,5,7,8,3<br>5,37,38,39 4,36,40 | 1 Q68G31                                                                        |
| 2765 | 1,2,6,33,3 3,4,5,7,8,3<br>5,37,38,40 4,36,39 | 6 P01039,P14173,P63029,Q68G31,Q9Z0V6,Q9Z1F2                                     |
| 2766 | 1,2,6,33,3 3,4,5,7,8,3<br>5,37,39,40 4,36,38 | 6 O70417,P02625,P35280,P97840,Q68G31,Q9EQS0                                     |
| 2767 | 1,2,6,33,3 3,4,5,7,8,3<br>5,38,39,40 4,36,37 | 11 P01039,P06760,P47967,P49134,P51740,P55091,P97840,P98089,Q5I0D1,Q62635,Q68G31 |
| 2768 | 1,2,6,33,3 3,4,5,7,8,3<br>6,37,38,39 4,35,40 | 3 P36860,Q63474,Q68G31                                                          |

|      |                                              |                                                                          |
|------|----------------------------------------------|--------------------------------------------------------------------------|
| 2769 | 1,2,6,33,3 3,4,5,7,8,3<br>6,37,38,40 4,35,39 | 8 P14173,P19629,P36860,P63029,Q5GRG2,Q63474,Q68G31,Q9Z0V6                |
| 2770 | 1,2,6,33,3 3,4,5,7,8,3<br>6,37,39,40 4,35,38 | 7 O70417,P19629,P35280,P36860,Q5GRG2,Q68G31,Q9EQS0                       |
| 2771 | 1,2,6,33,3 3,4,5,7,8,3<br>6,38,39,40 4,35,37 | 8 P01039,P06760,P36860,P47967,P51740,P55091,P97840,Q68G31                |
| 2772 | 1,2,6,33,3 3,4,5,7,8,3<br>7,38,39,40 4,35,36 | 10 P01039,P14173,P36860,P47967,P51740,P55091,P97840,Q5GRG2,Q68G31,Q9QX74 |
| 2773 | 1,2,6,34,3 3,4,5,7,8,3<br>5,36,37,38 3,39,40 | 3 D3ZTE0,P14173,Q5RKI1                                                   |
| 2774 | 1,2,6,34,3 3,4,5,7,8,3<br>5,36,37,39 3,38,40 | 2 O70417,P35280                                                          |
| 2775 | 1,2,6,34,3 3,4,5,7,8,3<br>5,36,37,40 3,38,39 | 4 O70417,P35280,Q5RKI1,Q9EQS0                                            |
| 2776 | 1,2,6,34,3 3,4,5,7,8,3<br>5,36,38,39 3,37,40 | 0                                                                        |
| 2777 | 1,2,6,34,3 3,4,5,7,8,3<br>5,36,38,40 3,37,39 | 1 Q5RKI1                                                                 |
| 2778 | 1,2,6,34,3 3,4,5,7,8,3<br>5,36,39,40 3,37,38 | 2 P35280,Q9EQS0                                                          |
| 2779 | 1,2,6,34,3 3,4,5,7,8,3<br>5,37,38,39 3,36,40 | 1 P01681                                                                 |
| 2780 | 1,2,6,34,3 3,4,5,7,8,3<br>5,37,38,40 3,36,39 | 3 P14173,P15399,Q5RKI1                                                   |
| 2781 | 1,2,6,34,3 3,4,5,7,8,3<br>5,37,39,40 3,36,38 | 4 O70417,P35280,P97840,Q9EQS0                                            |
| 2782 | 1,2,6,34,3 3,4,5,7,8,3<br>5,38,39,40 3,36,37 | 8 P15399,P47967,P51740,P55091,P97580,P97840,P98089,Q62635                |
| 2783 | 1,2,6,34,3 3,4,5,7,8,3<br>6,37,38,39 3,35,40 | 2 P01835,Q63474                                                          |
| 2784 | 1,2,6,34,3 3,4,5,7,8,3<br>6,37,38,40 3,35,39 | 7 P01835,P14173,P19629,Q4KLZ6,Q5GRG2,Q5RKI1,Q63474                       |
| 2785 | 1,2,6,34,3 3,4,5,7,8,3<br>6,37,39,40 3,35,38 | 4 O70417,P01835,P19629,P35280                                            |
| 2786 | 1,2,6,34,3 3,4,5,7,8,3<br>6,38,39,40 3,35,37 | 5 P15399,P36860,P51740,P55091,P97840                                     |
| 2787 | 1,2,6,34,3 3,4,5,7,8,3<br>7,38,39,40 3,35,36 | 8 P01835,P14173,P15399,P19629,P47967,P51740,P55091,P97840                |
| 2788 | 1,2,6,35,3 3,4,5,7,8,3<br>6,37,38,39 3,34,40 | 3 P00762,P14173,Q68G31                                                   |

|      |                          |                         |    |                                                                                                   |
|------|--------------------------|-------------------------|----|---------------------------------------------------------------------------------------------------|
| 2789 | 1,2,6,35,3<br>6,37,38,40 | 3,4,5,7,8,3<br>3,34,39  | 9  | D3ZTE0,P14173,P19629,P19814,Q5GRG2,Q5RKI1,Q68G31,Q9QX74,Q9Z0V6                                    |
| 2790 | 1,2,6,35,3<br>6,37,39,40 | 3,4,5,7,8,3<br>3,34,38  | 8  | O70417,P00762,P02625,P06760,P19629,P35280,Q68G31,Q9EQS0                                           |
| 2791 | 1,2,6,35,3<br>6,38,39,40 | 3,4,5,7,8,3<br>3,34,37  | 7  | P06760,P51740,P55091,P98089,Q62635,Q68G31,Q9QX74                                                  |
| 2792 | 1,2,6,35,3<br>7,38,39,40 | 3,4,5,7,8,3<br>3,34,36  | 14 | P00762,P06760,P14173,P26772,P47967,P51740,P55091,P97840,P98089,Q5EGZ1,Q5I0D7,Q62635,Q68G31,Q9QX74 |
| 2793 | 1,2,6,36,3<br>7,38,39,40 | 3,4,5,7,8,3<br>3,34,35  | 11 | P00762,P01835,P14173,P19629,P36860,P51740,Q5GRG2,Q5I0D7,Q63474,Q68G31,Q9QX74                      |
| 2794 | 1,2,7,8,33,<br>34,35,36  | 3,4,5,6,37,<br>38,39,40 | 6  | D3ZUC6,iRT-Kit_WR_fusion,O89117,P08721,P51740,Q9QX74                                              |
| 2795 | 1,2,7,8,33,<br>34,35,37  | 3,4,5,6,36,<br>38,39,40 | 6  | iRT-Kit_WR_fusion,O89117,P25809,P51740,Q66H69,Q9QX74                                              |
| 2796 | 1,2,7,8,33,<br>34,35,38  | 3,4,5,6,36,<br>37,39,40 | 4  | iRT-Kit_WR_fusion,O89117,P25809,P80299                                                            |
| 2797 | 1,2,7,8,33,<br>34,35,39  | 3,4,5,6,36,<br>37,38,40 | 4  | iRT-Kit_WR_fusion,P25809,Q9QX74,Q9Z0V6                                                            |
| 2798 | 1,2,7,8,33,<br>34,35,40  | 3,4,5,6,36,<br>37,38,39 | 1  | iRT-Kit_WR_fusion                                                                                 |
| 2799 | 1,2,7,8,33,<br>34,36,37  | 3,4,5,6,35,<br>38,39,40 | 7  | iRT-Kit_WR_fusion,P08723,P30919,P51740,Q66H69,Q9JHB9,Q9QX74                                       |
| 2800 | 1,2,7,8,33,<br>34,36,38  | 3,4,5,6,35,<br>37,39,40 | 3  | iRT-Kit_WR_fusion,P30919,P80299                                                                   |
| 2801 | 1,2,7,8,33,<br>34,36,39  | 3,4,5,6,35,<br>37,38,40 | 6  | iRT-Kit_WR_fusion,Q64093,Q99MH3,Q9QX74,Q9Z0V6,Q9Z1F2                                              |
| 2802 | 1,2,7,8,33,<br>34,36,40  | 3,4,5,6,35,<br>37,38,39 | 2  | iRT-Kit_WR_fusion,P30919                                                                          |
| 2803 | 1,2,7,8,33,<br>34,37,38  | 3,4,5,6,35,<br>36,39,40 | 2  | iRT-Kit_WR_fusion,Q6IG05                                                                          |
| 2804 | 1,2,7,8,33,<br>34,37,39  | 3,4,5,6,35,<br>36,38,40 | 4  | P21674,Q6AYQ8,Q9QWN8,Q9Z0V6                                                                       |
| 2805 | 1,2,7,8,33,<br>34,37,40  | 3,4,5,6,35,<br>36,38,39 | 7  | iRT-Kit_WR_fusion,P13432,P21674,P24368,P30120,Q66H69,Q9QW07                                       |
| 2806 | 1,2,7,8,33,<br>34,38,39  | 3,4,5,6,35,<br>36,37,40 | 6  | iRT-Kit_WR_fusion,P02793,Q7TP54,P17475,P19132,Q64093,Q9Z0V6                                       |
| 2807 | 1,2,7,8,33,<br>34,38,40  | 3,4,5,6,35,<br>36,37,39 | 4  | iRT-Kit_WR_fusion,P15399,P97580,Q30KJ2                                                            |
| 2808 | 1,2,7,8,33,<br>34,39,40  | 3,4,5,6,35,<br>36,37,38 | 6  | P09656,P19218,P21674,Q64093,Q6AYQ8,Q9Z0V6                                                         |

|      |                                              |                                                           |
|------|----------------------------------------------|-----------------------------------------------------------|
| 2809 | 1,2,7,8,33, 3,4,5,6,34,<br>35,36,37 38,39,40 | 2 P08723,P51740                                           |
| 2810 | 1,2,7,8,33, 3,4,5,6,34,<br>35,36,38 37,39,40 | 1 iRT-Kit_WR_fusion                                       |
| 2811 | 1,2,7,8,33, 3,4,5,6,34,<br>35,36,39 37,38,40 | 1 Q4KLZ6                                                  |
| 2812 | 1,2,7,8,33, 3,4,5,6,34,<br>35,36,40 37,38,39 | 1 iRT-Kit_WR_fusion                                       |
| 2813 | 1,2,7,8,33, 3,4,5,6,34,<br>35,37,38 36,39,40 | 1 Q68G31                                                  |
| 2814 | 1,2,7,8,33, 3,4,5,6,34,<br>35,37,39 36,38,40 | 1 Q4KLZ6                                                  |
| 2815 | 1,2,7,8,33, 3,4,5,6,34,<br>35,37,40 36,38,39 | 0                                                         |
| 2816 | 1,2,7,8,33, 3,4,5,6,34,<br>35,38,39 36,37,40 | 3 P11883,Q4KLZ6,Q68G31                                    |
| 2817 | 1,2,7,8,33, 3,4,5,6,34,<br>35,38,40 36,37,39 | 3 iRT-Kit_WR_fusion,Q62635,Q68G31                         |
| 2818 | 1,2,7,8,33, 3,4,5,6,34,<br>35,39,40 36,37,38 | 2 P29315,Q4KLZ6                                           |
| 2819 | 1,2,7,8,33, 3,4,5,6,34,<br>36,37,38 35,39,40 | 3 iRT-Kit_WR_fusion,P08723,Q63474                         |
| 2820 | 1,2,7,8,33, 3,4,5,6,34,<br>36,37,39 35,38,40 | 2 P08723,Q812E4                                           |
| 2821 | 1,2,7,8,33, 3,4,5,6,34,<br>36,37,40 35,38,39 | 7 O08815,P08723,P09456,P30120,P30919,P47727,Q812E4        |
| 2822 | 1,2,7,8,33, 3,4,5,6,34,<br>36,38,39 35,37,40 | 3 iRT-Kit_WR_fusion,P19132,Q64093                         |
| 2823 | 1,2,7,8,33, 3,4,5,6,34,<br>36,38,40 35,37,39 | 2 iRT-Kit_WR_fusion,P30919                                |
| 2824 | 1,2,7,8,33, 3,4,5,6,34,<br>36,39,40 35,37,38 | 0                                                         |
| 2825 | 1,2,7,8,33, 3,4,5,6,34,<br>37,38,39 35,36,40 | 2 P17475,Q68G31                                           |
| 2826 | 1,2,7,8,33, 3,4,5,6,34,<br>37,38,40 35,36,39 | 2 P30120,Q68G31                                           |
| 2827 | 1,2,7,8,33, 3,4,5,6,34,<br>37,39,40 35,36,38 | 4 P21674,Q6AYQ8,Q812E4,Q9QWN8                             |
| 2828 | 1,2,7,8,33, 3,4,5,6,34,<br>38,39,40 35,36,37 | 8 P11883,P17475,P19132,P55091,P97840,Q5I0D7,Q62635,Q64093 |

|      |                                              |                                                                                                   |
|------|----------------------------------------------|---------------------------------------------------------------------------------------------------|
| 2829 | 1,2,7,8,34, 3,4,5,6,33,<br>35,36,37 38,39,40 | 4 iRT-Kit_WR_fusion,P25809,P51740,Q66H69                                                          |
| 2830 | 1,2,7,8,34, 3,4,5,6,33,<br>35,36,38 37,39,40 | 2 iRT-Kit_WR_fusion,P25809                                                                        |
| 2831 | 1,2,7,8,34, 3,4,5,6,33,<br>35,36,39 37,38,40 | 3 P25809,Q9Z0V6,Q9Z1F2                                                                            |
| 2832 | 1,2,7,8,34, 3,4,5,6,33,<br>35,36,40 37,38,39 | 2 iRT-Kit_WR_fusion,Q66H69                                                                        |
| 2833 | 1,2,7,8,34, 3,4,5,6,33,<br>35,37,38 36,39,40 | 3 iRT-Kit_WR_fusion,P25809,P62804                                                                 |
| 2834 | 1,2,7,8,34, 3,4,5,6,33,<br>35,37,39 36,38,40 | 3 P25809,Q66H69,Q9Z0V6                                                                            |
| 2835 | 1,2,7,8,34, 3,4,5,6,33,<br>35,37,40 36,38,39 | 2 Q66H69,Q923V8                                                                                   |
| 2836 | 1,2,7,8,34, 3,4,5,6,33,<br>35,38,39 36,37,40 | 4 iRT-Kit_WR_fusion,P11883,P25809,Q9Z0V6                                                          |
| 2837 | 1,2,7,8,34, 3,4,5,6,33,<br>35,38,40 36,37,39 | 5 iRT-Kit_WR_fusion,P15399,P97580,Q30KJ2,Q62635                                                   |
| 2838 | 1,2,7,8,34, 3,4,5,6,33,<br>35,39,40 36,37,38 | 5 P09656,P15399,P97580,Q30KJ2,Q9Z0V6                                                              |
| 2839 | 1,2,7,8,34, 3,4,5,6,33,<br>36,37,38 35,39,40 | 4 iRT-Kit_WR_fusion,P62804,Q00715,Q63474                                                          |
| 2840 | 1,2,7,8,34, 3,4,5,6,33,<br>36,37,39 35,38,40 | 5 P62804,Q66H69,Q812E4,Q9Z0V6,Q9Z1F2                                                              |
| 2841 | 1,2,7,8,34, 3,4,5,6,33,<br>36,37,40 35,38,39 | 7 P13432,P30120,P47727,P62804,Q66H69,Q811M5,Q812E4                                                |
| 2842 | 1,2,7,8,34, 3,4,5,6,33,<br>36,38,39 35,37,40 | 3 iRT-Kit_WR_fusion,Q64093,Q9Z0V6                                                                 |
| 2843 | 1,2,7,8,34, 3,4,5,6,33,<br>36,38,40 35,37,39 | 5 iRT-Kit_WR_fusion,P15399,P30919,P62804,P97580                                                   |
| 2844 | 1,2,7,8,34, 3,4,5,6,33,<br>36,39,40 35,37,38 | 0                                                                                                 |
| 2845 | 1,2,7,8,34, 3,4,5,6,33,<br>37,38,39 35,36,40 | 4 P17475,P62804,Q64093,Q9Z0V6                                                                     |
| 2846 | 1,2,7,8,34, 3,4,5,6,33,<br>37,38,40 35,36,39 | 6 iRT-Kit_WR_fusion,P01835,P15399,P62804,P97580,Q811M5                                            |
| 2847 | 1,2,7,8,34, 3,4,5,6,33,<br>37,39,40 35,36,38 | 5 P21674,P62804,Q66H69,Q923V8,Q9Z0V6                                                              |
| 2848 | 1,2,7,8,34, 3,4,5,6,33,<br>38,39,40 35,36,37 | 13 D4A5U3,P09656,P11883,P15399,P17475,P55091,P97580,P97840,Q30KJ2,Q62635,Q64093,Q8CI<br>Z5,Q9Z0V6 |

|      |                                              |                                                           |
|------|----------------------------------------------|-----------------------------------------------------------|
| 2849 | 1,2,7,8,35, 3,4,5,6,33,<br>36,37,38 34,39,40 | 0                                                         |
| 2850 | 1,2,7,8,35, 3,4,5,6,33,<br>36,37,39 34,38,40 | 1 Q66H69                                                  |
| 2851 | 1,2,7,8,35, 3,4,5,6,33,<br>36,37,40 34,38,39 | 1 Q66H69                                                  |
| 2852 | 1,2,7,8,35, 3,4,5,6,33,<br>36,38,39 34,37,40 | 0                                                         |
| 2853 | 1,2,7,8,35, 3,4,5,6,33,<br>36,38,40 34,37,39 | 3 iRT-Kit_WR_fusion,P19814,Q62635                         |
| 2854 | 1,2,7,8,35, 3,4,5,6,33,<br>36,39,40 34,37,38 | 0                                                         |
| 2855 | 1,2,7,8,35, 3,4,5,6,33,<br>37,38,39 34,36,40 | 2 P11883,P35745                                           |
| 2856 | 1,2,7,8,35, 3,4,5,6,33,<br>37,38,40 34,36,39 | 2 P14173,Q62635                                           |
| 2857 | 1,2,7,8,35, 3,4,5,6,33,<br>37,39,40 34,36,38 | 0                                                         |
| 2858 | 1,2,7,8,35, 3,4,5,6,33,<br>38,39,40 34,36,37 | 8 P11883,P26772,P55091,P97584,P98089,Q5EGZ1,Q5I0D7,Q62635 |
| 2859 | 1,2,7,8,36, 3,4,5,6,33,<br>37,38,39 34,35,40 | 1 Q63474                                                  |
| 2860 | 1,2,7,8,36, 3,4,5,6,33,<br>37,38,40 34,35,39 | 6 P06911,P14173,P19629,Q5GRG2,Q63474,Q811M5               |
| 2861 | 1,2,7,8,36, 3,4,5,6,33,<br>37,39,40 34,35,38 | 5 P06911,P19629,Q5GRG2,Q66H69,Q812E4                      |
| 2862 | 1,2,7,8,36, 3,4,5,6,33,<br>38,39,40 34,35,37 | 2 Q5I0D7,Q62635                                           |
| 2863 | 1,2,7,8,37, 3,4,5,6,33,<br>38,39,40 34,35,36 | 8 D4A5U3,P01835,P11883,P17475,P26772,Q5GRG2,Q5I0D7,Q62635 |
| 2864 | 1,2,7,33,3 3,4,5,6,8,3<br>4,35,36,37 8,39,40 | 7 D3ZUC6,P08721,P25031,P36376,P51740,P54921,Q9R168        |
| 2865 | 1,2,7,33,3 3,4,5,6,8,3<br>4,35,36,38 7,39,40 | 6 D3ZUC6,P08721,P49134,P80299,P82471,Q9R168               |
| 2866 | 1,2,7,33,3 3,4,5,6,8,3<br>4,35,36,39 7,38,40 | 3 D3ZUC6,P08721,P49134                                    |
| 2867 | 1,2,7,33,3 3,4,5,6,8,3<br>4,35,36,40 7,38,39 | 3 D3ZUC6,Q9EQS0,Q9R168                                    |
| 2868 | 1,2,7,33,3 3,4,5,6,8,3<br>4,35,37,38 6,39,40 | 5 D3ZUC6,P14173,P54921,P80299,Q9R168                      |



|      |                                              |                                                                  |
|------|----------------------------------------------|------------------------------------------------------------------|
| 2869 | 1,2,7,33,3 3,4,5,6,8,3<br>4,35,37,39 6,38,40 | 1 O70417                                                         |
| 2870 | 1,2,7,33,3 3,4,5,6,8,3<br>4,35,37,40 6,38,39 | 1 Q9R168                                                         |
| 2871 | 1,2,7,33,3 3,4,5,6,8,3<br>4,35,38,39 6,37,40 | 3 D3ZUC6,P19132,P80299                                           |
| 2872 | 1,2,7,33,3 3,4,5,6,8,3<br>4,35,38,40 6,37,39 | 5 D3ZUC6,P63029,P80299,P97829,Q9R168                             |
| 2873 | 1,2,7,33,3 3,4,5,6,8,3<br>4,35,39,40 6,37,38 | 2 P09656,P19218                                                  |
| 2874 | 1,2,7,33,3 3,4,5,6,8,3<br>4,36,37,38 5,39,40 | 6 P14173,P30919,P36376,P54921,P80299,Q9R168                      |
| 2875 | 1,2,7,33,3 3,4,5,6,8,3<br>4,36,37,39 5,38,40 | 2 O70417,P25031                                                  |
| 2876 | 1,2,7,33,3 3,4,5,6,8,3<br>4,36,37,40 5,38,39 | 4 P24368,P30919,P36376,Q9R168                                    |
| 2877 | 1,2,7,33,3 3,4,5,6,8,3<br>4,36,38,39 5,37,40 | 5 P19132,P80299,P82471,Q64093,Q99041                             |
| 2878 | 1,2,7,33,3 3,4,5,6,8,3<br>4,36,38,40 5,37,39 | 4 P30919,P63029,P80299,Q9R168                                    |
| 2879 | 1,2,7,33,3 3,4,5,6,8,3<br>4,36,39,40 5,37,38 | 2 P19218,Q64093                                                  |
| 2880 | 1,2,7,33,3 3,4,5,6,8,3<br>4,37,38,39 5,36,40 | 4 P17475,Q64093,Q6AY61,Q6AYQ8                                    |
| 2881 | 1,2,7,33,3 3,4,5,6,8,3<br>4,37,38,40 5,36,39 | 4 P14173,Q62714,Q6AY61,Q9R168                                    |
| 2882 | 1,2,7,33,3 3,4,5,6,8,3<br>4,37,39,40 5,36,38 | 4 O70417,P19218,P21674,Q6AYQ8                                    |
| 2883 | 1,2,7,33,3 3,4,5,6,8,3<br>4,38,39,40 5,36,37 | 9 P01039,P09656,P17475,P19132,P19218,P55091,P80299,P97840,Q64093 |
| 2884 | 1,2,7,33,3 3,4,5,6,8,3<br>5,36,37,38 4,39,40 | 3 P14173,Q68G31,Q9R168                                           |
| 2885 | 1,2,7,33,3 3,4,5,6,8,3<br>5,36,37,39 4,38,40 | 1 P25031                                                         |
| 2886 | 1,2,7,33,3 3,4,5,6,8,3<br>5,36,37,40 4,38,39 | 2 Q9EQS0,Q9R168                                                  |
| 2887 | 1,2,7,33,3 3,4,5,6,8,3<br>5,36,38,39 4,37,40 | 1 P49134                                                         |
| 2888 | 1,2,7,33,3 3,4,5,6,8,3<br>5,36,38,40 4,37,39 | 3 P49134,P63029,Q9R168                                           |

|      |                                              |                                             |
|------|----------------------------------------------|---------------------------------------------|
| 2889 | 1,2,7,33,3 3,4,5,6,8,3<br>5,36,39,40 4,37,38 | 2 P49134,Q9EQS0                             |
| 2890 | 1,2,7,33,3 3,4,5,6,8,3<br>5,37,38,39 4,36,40 | 2 P14173,Q68G31                             |
| 2891 | 1,2,7,33,3 3,4,5,6,8,3<br>5,37,38,40 4,36,39 | 3 P14173,Q68G31,Q9R168                      |
| 2892 | 1,2,7,33,3 3,4,5,6,8,3<br>5,37,39,40 4,36,38 | 3 O70417,P02625,Q68G31                      |
| 2893 | 1,2,7,33,3 3,4,5,6,8,3<br>5,38,39,40 4,36,37 | 4 P55091,P98089,Q62635,Q68G31               |
| 2894 | 1,2,7,33,3 3,4,5,6,8,3<br>6,37,38,39 4,35,40 | 3 Q63474,Q64093,Q68G31                      |
| 2895 | 1,2,7,33,3 3,4,5,6,8,3<br>6,37,38,40 4,35,39 | 6 P14173,P30919,P36860,Q63474,Q68G31,Q9R168 |
| 2896 | 1,2,7,33,3 3,4,5,6,8,3<br>6,37,39,40 4,35,38 | 2 O70417,P19629                             |
| 2897 | 1,2,7,33,3 3,4,5,6,8,3<br>6,38,39,40 4,35,37 | 4 B2RYW9,P36860,P55091,Q64093               |
| 2898 | 1,2,7,33,3 3,4,5,6,8,3<br>7,38,39,40 4,35,36 | 6 P14173,P17475,P48199,P55091,Q5I0D7,Q68G31 |
| 2899 | 1,2,7,34,3 3,4,5,6,8,3<br>5,36,37,38 3,39,40 | 3 P14173,P25031,Q9R168                      |
| 2900 | 1,2,7,34,3 3,4,5,6,8,3<br>5,36,37,39 3,38,40 | 2 O70417,P25031                             |
| 2901 | 1,2,7,34,3 3,4,5,6,8,3<br>5,36,37,40 3,38,39 | 2 Q9EQS0,Q9R168                             |
| 2902 | 1,2,7,34,3 3,4,5,6,8,3<br>5,36,38,39 3,37,40 | 0                                           |
| 2903 | 1,2,7,34,3 3,4,5,6,8,3<br>5,36,38,40 3,37,39 | 1 Q9R168                                    |
| 2904 | 1,2,7,34,3 3,4,5,6,8,3<br>5,36,39,40 3,37,38 | 1 Q9EQS0                                    |
| 2905 | 1,2,7,34,3 3,4,5,6,8,3<br>5,37,38,39 3,36,40 | 1 P14173                                    |
| 2906 | 1,2,7,34,3 3,4,5,6,8,3<br>5,37,38,40 3,36,39 | 2 P14173,Q9R168                             |
| 2907 | 1,2,7,34,3 3,4,5,6,8,3<br>5,37,39,40 3,36,38 | 1 O70417                                    |
| 2908 | 1,2,7,34,3 3,4,5,6,8,3<br>5,38,39,40 3,36,37 | 4 P09656,P55091,P98089,Q62635               |

|      |                                              |                                                                          |
|------|----------------------------------------------|--------------------------------------------------------------------------|
| 2909 | 1,2,7,34,3 3,4,5,6,8,3<br>6,37,38,39 3,35,40 | 3 P01835,P14173,Q64093                                                   |
| 2910 | 1,2,7,34,3 3,4,5,6,8,3<br>6,37,38,40 3,35,39 | 6 P01835,P14173,P62804,Q63474,Q811M5,Q9R168                              |
| 2911 | 1,2,7,34,3 3,4,5,6,8,3<br>6,37,39,40 3,35,38 | 3 O70417,P01835,P19629                                                   |
| 2912 | 1,2,7,34,3 3,4,5,6,8,3<br>6,38,39,40 3,35,37 | 1 Q64093                                                                 |
| 2913 | 1,2,7,34,3 3,4,5,6,8,3<br>7,38,39,40 3,35,36 | 5 P01835,P14173,P17475,Q64093,Q6AY61                                     |
| 2914 | 1,2,7,35,3 3,4,5,6,8,3<br>6,37,38,39 3,34,40 | 3 P14173,P25031,Q05702                                                   |
| 2915 | 1,2,7,35,3 3,4,5,6,8,3<br>6,37,38,40 3,34,39 | 3 D3ZTE0,P14173,Q9R168                                                   |
| 2916 | 1,2,7,35,3 3,4,5,6,8,3<br>6,37,39,40 3,34,38 | 4 O70417,P00762,P02625,P0DMW0;P0DMW1                                     |
| 2917 | 1,2,7,35,3 3,4,5,6,8,3<br>6,38,39,40 3,34,37 | 4 P55091,P98089,Q05702,Q62635                                            |
| 2918 | 1,2,7,35,3 3,4,5,6,8,3<br>7,38,39,40 3,34,36 | 10 P00762,P02625,P08649,P14173,P26772,P55091,P98089,Q05702,Q5I0D7,Q62635 |
| 2919 | 1,2,7,36,3 3,4,5,6,8,3<br>7,38,39,40 3,34,35 | 6 P00762,P01835,P14173,P19629,Q5I0D7,Q63474                              |
| 2920 | 1,2,8,33,3 3,4,5,6,7,3<br>4,35,36,37 8,39,40 | 6 D3ZUC6,O89117,P08723,P25809,P51740,Q5QE79                              |
| 2921 | 1,2,8,33,3 3,4,5,6,7,3<br>4,35,36,38 7,39,40 | 4 D3ZUC6,O89117,P25809,P63029                                            |
| 2922 | 1,2,8,33,3 3,4,5,6,7,3<br>4,35,36,39 7,38,40 | 4 D3ZUC6,P25809,Q99041,Q99MH3                                            |
| 2923 | 1,2,8,33,3 3,4,5,6,7,3<br>4,35,36,40 7,38,39 | 4 D3ZUC6,O89117,P15399,Q5QE79                                            |
| 2924 | 1,2,8,33,3 3,4,5,6,7,3<br>4,35,37,38 6,39,40 | 4 D3ZUC6,O89117,P25809,Q68G31                                            |
| 2925 | 1,2,8,33,3 3,4,5,6,7,3<br>4,35,37,39 6,38,40 | 2 P25809,Q9QWN8                                                          |
| 2926 | 1,2,8,33,3 3,4,5,6,7,3<br>4,35,37,40 6,38,39 | 4 O89117,P13432,P15399,Q9QWN8                                            |
| 2927 | 1,2,8,33,3 3,4,5,6,7,3<br>4,35,38,39 6,37,40 | 5 D3ZUC6,P19132,P25809,P97840,Q68G31                                     |
| 2928 | 1,2,8,33,3 3,4,5,6,7,3<br>4,35,38,40 6,37,39 | 7 D3ZUC6,P15399,P63029,P97580,P97840,Q30KJ2,Q68G31                       |

|      |                          |                        |    |                                                                       |
|------|--------------------------|------------------------|----|-----------------------------------------------------------------------|
| 2929 | 1,2,8,33,3<br>4,35,39,40 | 3,4,5,6,7,3<br>6,37,38 | 7  | P09656,P15399,P19218,P47967,P97580,P97840,Q30KJ2                      |
| 2930 | 1,2,8,33,3<br>4,36,37,38 | 3,4,5,6,7,3<br>5,39,40 | 2  | P08723,Q63474                                                         |
| 2931 | 1,2,8,33,3<br>4,36,37,39 | 3,4,5,6,7,3<br>5,38,40 | 1  | Q9QWN8                                                                |
| 2932 | 1,2,8,33,3<br>4,36,37,40 | 3,4,5,6,7,3<br>5,38,39 | 6  | P08723,P13432,P24368,P30120,P47727,Q5QE79                             |
| 2933 | 1,2,8,33,3<br>4,36,38,39 | 3,4,5,6,7,3<br>5,37,40 | 3  | P19132,Q64093,Q99041                                                  |
| 2934 | 1,2,8,33,3<br>4,36,38,40 | 3,4,5,6,7,3<br>5,37,39 | 3  | P15399,P63029,P97580                                                  |
| 2935 | 1,2,8,33,3<br>4,36,39,40 | 3,4,5,6,7,3<br>5,37,38 | 3  | P15399,P19218,Q99041                                                  |
| 2936 | 1,2,8,33,3<br>4,37,38,39 | 3,4,5,6,7,3<br>5,36,40 | 7  | P02793;Q7TP54,P17475,P19132,P97840,Q68G31,Q99376,Q9QWN8               |
| 2937 | 1,2,8,33,3<br>4,37,38,40 | 3,4,5,6,7,3<br>5,36,39 | 5  | P15399,P30120,P97580,Q68G31,Q9QWN8                                    |
| 2938 | 1,2,8,33,3<br>4,37,39,40 | 3,4,5,6,7,3<br>5,36,38 | 6  | P13432,P15399,P19218,P21674,P97840,Q9QWN8                             |
| 2939 | 1,2,8,33,3<br>4,38,39,40 | 3,4,5,6,7,3<br>5,36,37 | 10 | P09656,P15399,P19132,P47967,P55091,P97580,P97840,Q30KJ2,Q5I0D1,Q62635 |
| 2940 | 1,2,8,33,3<br>5,36,37,38 | 3,4,5,6,7,3<br>4,39,40 | 1  | Q68G31                                                                |
| 2941 | 1,2,8,33,3<br>5,36,37,39 | 3,4,5,6,7,3<br>4,38,40 | 2  | P50116,Q68G31                                                         |
| 2942 | 1,2,8,33,3<br>5,36,37,40 | 3,4,5,6,7,3<br>4,38,39 | 3  | P50116,P60905,Q68G31                                                  |
| 2943 | 1,2,8,33,3<br>5,36,38,39 | 3,4,5,6,7,3<br>4,37,40 | 2  | P49134,Q68G31                                                         |
| 2944 | 1,2,8,33,3<br>5,36,38,40 | 3,4,5,6,7,3<br>4,37,39 | 3  | P49134,P63029,Q68G31                                                  |
| 2945 | 1,2,8,33,3<br>5,36,39,40 | 3,4,5,6,7,3<br>4,37,38 | 2  | P49134,Q68G31                                                         |
| 2946 | 1,2,8,33,3<br>5,37,38,39 | 3,4,5,6,7,3<br>4,36,40 | 2  | Q68G31,Q9QWN8                                                         |
| 2947 | 1,2,8,33,3<br>5,37,38,40 | 3,4,5,6,7,3<br>4,36,39 | 2  | P63029,Q68G31                                                         |
| 2948 | 1,2,8,33,3<br>5,37,39,40 | 3,4,5,6,7,3<br>4,36,38 | 3  | P50116,Q68G31,Q9QWN8                                                  |

|      |                                              |                                                                                 |
|------|----------------------------------------------|---------------------------------------------------------------------------------|
| 2949 | 1,2,8,33,3 3,4,5,6,7,3<br>5,38,39,40 4,36,37 | 9 P11598,P47967,P55091,P97840,P98089,Q5I0D1,Q5I0D7,Q62635,Q68G31                |
| 2950 | 1,2,8,33,3 3,4,5,6,7,3<br>6,37,38,39 4,35,40 | 2 Q63474,Q68G31                                                                 |
| 2951 | 1,2,8,33,3 3,4,5,6,7,3<br>6,37,38,40 4,35,39 | 5 P19629,P30120,Q5GRG2,Q63474,Q68G31                                            |
| 2952 | 1,2,8,33,3 3,4,5,6,7,3<br>6,37,39,40 4,35,38 | 4 P19629,Q68G31,Q812E4,Q9QWN8                                                   |
| 2953 | 1,2,8,33,3 3,4,5,6,7,3<br>6,38,39,40 4,35,37 | 5 P19132,P55091,P97840,Q62635,Q68G31                                            |
| 2954 | 1,2,8,33,3 3,4,5,6,7,3<br>7,38,39,40 4,35,36 | 8 P17475,P47967,P55091,P97840,Q5I0D7,Q62635,Q68G31,Q9QWN8                       |
| 2955 | 1,2,8,34,3 3,4,5,6,7,3<br>5,36,37,38 3,39,40 | 2 P25809,Q5RKI1                                                                 |
| 2956 | 1,2,8,34,3 3,4,5,6,7,3<br>5,36,37,39 3,38,40 | 2 P25809,P50116                                                                 |
| 2957 | 1,2,8,34,3 3,4,5,6,7,3<br>5,36,37,40 3,38,39 | 4 P13432,P15399,P50116,Q5RKI1                                                   |
| 2958 | 1,2,8,34,3 3,4,5,6,7,3<br>5,36,38,39 3,37,40 | 1 P25809                                                                        |
| 2959 | 1,2,8,34,3 3,4,5,6,7,3<br>5,36,38,40 3,37,39 | 4 P15399,P97580,Q30KJ2,Q5RKI1                                                   |
| 2960 | 1,2,8,34,3 3,4,5,6,7,3<br>5,36,39,40 3,37,38 | 2 P15399,P97580                                                                 |
| 2961 | 1,2,8,34,3 3,4,5,6,7,3<br>5,37,38,39 3,36,40 | 1 P25809                                                                        |
| 2962 | 1,2,8,34,3 3,4,5,6,7,3<br>5,37,38,40 3,36,39 | 5 P15399,P25809,P97580,Q30KJ2,Q5RKI1                                            |
| 2963 | 1,2,8,34,3 3,4,5,6,7,3<br>5,37,39,40 3,36,38 | 5 P13432,P15399,P50116,P97580,Q923V8                                            |
| 2964 | 1,2,8,34,3 3,4,5,6,7,3<br>5,38,39,40 3,36,37 | 11 P09656,P15399,P25809,P47967,P55091,P97580,P97840,P98089,Q30KJ2,Q62635,Q8CIZ5 |
| 2965 | 1,2,8,34,3 3,4,5,6,7,3<br>6,37,38,39 3,35,40 | 1 Q63474                                                                        |
| 2966 | 1,2,8,34,3 3,4,5,6,7,3<br>6,37,38,40 3,35,39 | 6 P15399,P19629,P97580,Q5RKI1,Q63474,Q811M5                                     |
| 2967 | 1,2,8,34,3 3,4,5,6,7,3<br>6,37,39,40 3,35,38 | 4 P13432,P15399,P19629,Q812E4                                                   |
| 2968 | 1,2,8,34,3 3,4,5,6,7,3<br>6,38,39,40 3,35,37 | 6 P15399,P97580,P97840,Q30KJ2,Q62635,Q8CIZ5                                     |

|      |                               |                        |                                                                                 |
|------|-------------------------------|------------------------|---------------------------------------------------------------------------------|
| 2969 | 1,2,8,34,3<br>7,38,39,40      | 3,4,5,6,7,3<br>3,35,36 | 8 D4A5U3,P15399,P47967,P97580,P97840,Q30KJ2,Q5I0D7,Q62635                       |
| 2970 | 1,2,8,35,3<br>6,37,38,39      | 3,4,5,6,7,3<br>3,34,40 | 1 Q68G31                                                                        |
| 2971 | 1,2,8,35,3<br>6,37,38,40      | 3,4,5,6,7,3<br>3,34,39 | 3 P14173,Q5RKI1,Q68G31                                                          |
| 2972 | 1,2,8,35,3<br>6,37,39,40      | 3,4,5,6,7,3<br>3,34,38 | 3 P19629,P50116,P60905                                                          |
| 2973 | 1,2,8,35,3<br>6,38,39,40      | 3,4,5,6,7,3<br>3,34,37 | 5 P55091,P98089,Q5I0D7,Q62635,Q68G31                                            |
| 2974 | 1,2,8,35,3<br>7,38,39,40      | 3,4,5,6,7,3<br>3,34,36 | 9 P08721,P26772,P47967,P55091,P97840,P98089,Q5I0D7,Q62635,Q68G31                |
| 2975 | 1,2,8,36,3<br>7,38,39,40      | 3,4,5,6,7,3<br>3,34,35 | 6 P19629,Q5GRG2,Q5I0D7,Q62635,Q63474,Q68G31                                     |
| 2976 | 1,2,33,34,<br>35,36,37,3<br>8 | 3,4,5,6,7,8<br>,39,40  | 5 D3ZUC6,P14173,P22273,Q68G31,Q9R168                                            |
| 2977 | 1,2,33,34,<br>35,36,37,3<br>9 | 3,4,5,6,7,8<br>,38,40  | 11 D3ZUC6,O35568,O70417,P06866,P22273,P25031,P35280,P36374,P50115,P50116,Q99041 |
| 2978 | 1,2,33,34,<br>35,36,37,4<br>0 | 3,4,5,6,7,8<br>,38,39  | 9 D3ZUC6,O70417,P22273,P35280,P36374,P50115,Q5QE79,Q9EQS0,Q9R168                |
| 2979 | 1,2,33,34,<br>35,36,38,3<br>9 | 3,4,5,6,7,8<br>,37,40  | 6 D3ZUC6,O35568,P19132,P22273,P49134,Q99041                                     |
| 2980 | 1,2,33,34,<br>35,36,38,4<br>0 | 3,4,5,6,7,8<br>,37,39  | 6 D3ZUC6,P22273,P49134,P63029,Q99041,Q9R168                                     |
| 2981 | 1,2,33,34,<br>35,36,39,4<br>0 | 3,4,5,6,7,8<br>,37,38  | 8 D3ZUC6,O70417,P19218,P22273,P35280,P49134,Q99041,Q9EQS0                       |
| 2982 | 1,2,33,34,<br>35,37,38,3<br>9 | 3,4,5,6,7,8<br>,36,40  | 3 D3ZUC6,P22273,Q68G31                                                          |
| 2983 | 1,2,33,34,<br>35,37,38,4<br>0 | 3,4,5,6,7,8<br>,36,39  | 6 D3ZUC6,P14173,P22273,P63029,Q68G31,Q9R168                                     |
| 2984 | 1,2,33,34,<br>35,37,39,4<br>0 | 3,4,5,6,7,8<br>,36,38  | 8 D3ZUC6,O70417,P19218,P22273,P35280,P50115,Q68G31,Q9EQS0                       |

|      |                               |                       |    |                                                                                                                     |
|------|-------------------------------|-----------------------|----|---------------------------------------------------------------------------------------------------------------------|
| 2985 | 1,2,33,34,<br>35,38,39,4<br>0 | 3,4,5,6,7,8<br>,36,37 | 16 | D3ZUC6,P11598,P19132,P19218,P22273,P47967,P55091,P63029,P97829,P97840,P98089,Q5I0D<br>1,Q62635,Q63617,Q68G31,Q99041 |
| 2986 | 1,2,33,34,<br>36,37,38,3<br>9 | 3,4,5,6,7,8<br>,35,40 | 6  | P06866,P22273,P36374,Q63474,Q68G31,Q99041                                                                           |
| 2987 | 1,2,33,34,<br>36,37,38,4<br>0 | 3,4,5,6,7,8<br>,35,39 | 8  | P14173,P22273,P23593,P36374,P36860,P63029,Q63474,Q9R168                                                             |
| 2988 | 1,2,33,34,<br>36,37,39,4<br>0 | 3,4,5,6,7,8<br>,35,38 | 6  | O70417,P19218,P22273,P35280,P36374,Q99041                                                                           |
| 2989 | 1,2,33,34,<br>36,38,39,4<br>0 | 3,4,5,6,7,8<br>,35,37 | 9  | P19132,P19218,P22273,P36860,P55091,P97840,Q63617,Q64093,Q99041                                                      |
| 2990 | 1,2,33,34,<br>37,38,39,4<br>0 | 3,4,5,6,7,8<br>,35,36 | 9  | P17475,P19132,P19218,P47967,P48199,P55091,P97840,Q5I0D1,Q68G31                                                      |
| 2991 | 1,2,33,35,<br>36,37,38,3<br>9 | 3,4,5,6,7,8<br>,34,40 | 5  | O35568,P22273,P49134,Q68G31,Q99041                                                                                  |
| 2992 | 1,2,33,35,<br>36,37,38,4<br>0 | 3,4,5,6,7,8<br>,34,39 | 5  | P14173,P22273,P63029,Q68G31,Q9Z0V6                                                                                  |
| 2993 | 1,2,33,35,<br>36,37,39,4<br>0 | 3,4,5,6,7,8<br>,34,38 | 9  | O35568,O70417,P22273,P35280,P36374,P50115,P50116,Q68G31,Q9EQS0                                                      |
| 2994 | 1,2,33,35,<br>36,38,39,4<br>0 | 3,4,5,6,7,8<br>,34,37 | 13 | O35568,P06760,P11598,P22273,P22282,P49134,P55091,P63029,P98089,Q62635,Q63617,Q68G<br>31,Q99041                      |
| 2995 | 1,2,33,35,<br>37,38,39,4<br>0 | 3,4,5,6,7,8<br>,34,36 | 10 | P14173,P26772,P47967,P48199,P55091,P97840,P98089,Q5I0D7,Q62635,Q68G31                                               |
| 2996 | 1,2,33,36,<br>37,38,39,4<br>0 | 3,4,5,6,7,8<br>,34,35 | 9  | P14173,P19629,P36374,P36860,P48199,Q5I0D7,Q63474,Q68G31,Q99041                                                      |
| 2997 | 1,2,34,35,<br>36,37,38,3<br>9 | 3,4,5,6,7,8<br>,33,40 | 3  | P14173,P22273,P25031                                                                                                |

|      |                               |                                |    |                                                                                                                                                           |
|------|-------------------------------|--------------------------------|----|-----------------------------------------------------------------------------------------------------------------------------------------------------------|
| 2998 | 1,2,34,35,<br>36,37,38,4<br>0 | 3,4,5,6,7,8<br>,33,39          | 5  | D3ZTE0,P14173,P22273,Q5RKI1,Q9R168                                                                                                                        |
| 2999 | 1,2,34,35,<br>36,37,39,4<br>0 | 3,4,5,6,7,8<br>,33,38          | 6  | O70417,P22273,P35280,P50115,P50116,Q9EQS0                                                                                                                 |
| 3000 | 1,2,34,35,<br>36,38,39,4<br>0 | 3,4,5,6,7,8<br>,33,37          | 5  | P22273,P55091,P98089,Q62635,Q63617                                                                                                                        |
| 3001 | 1,2,34,35,<br>37,38,39,4<br>0 | 3,4,5,6,7,8<br>,33,36          | 7  | P14173,P22273,P55091,P97840,P98089,Q62635,Q99PP0                                                                                                          |
| 3002 | 1,2,34,36,<br>37,38,39,4<br>0 | 3,4,5,6,7,8<br>,33,35          | 5  | O70417,P14173,P19629,P22273,Q63474                                                                                                                        |
| 3003 | 1,2,35,36,<br>37,38,39,4<br>0 | 3,4,5,6,7,8<br>,33,34          | 13 | P11030,P14173,P19629,P22273,P26772,P98089,Q05702,Q5I0D7,Q62635,Q68G31,Q99PP0,Q9QW30,Q9QX74                                                                |
| 3004 | 1,3,4,5,6,7<br>,8,33          | 2,34,35,36<br>,37,38,39,<br>40 | 14 | O54858,P22273,P23593,P42854,P48032,P98089,Q05702,Q09030,Q4AEF8,Q62635,Q63475,Q91XN4,Q99PP0,Q9QW30                                                         |
| 3005 | 1,3,4,5,6,7<br>,8,34          | 2,33,35,36<br>,37,38,39,<br>40 | 16 | O35568,P11030,P11598,P36374,P42854,P48199,P49134,P55091,P98089,Q05702,Q09030,Q4AEF8,Q62635,Q68G31,Q91XN4,Q9Z1F2                                           |
| 3006 | 1,3,4,5,6,7<br>,8,35          | 2,33,34,36<br>,37,38,39,<br>40 | 13 | O35568,P19218,P23593,P36374,P48032,P48199,P85971,P97840,Q09030,Q4AEF8,Q63149,Q91XN4,Q99041                                                                |
| 3007 | 1,3,4,5,6,7<br>,8,36          | 2,33,34,35<br>,37,38,39,<br>40 | 16 | P11598,P19218,P42854,P47967,P48199,P55091,P97829,P97840,P98089,Q09030,Q4AEF8,Q5I0D1,Q62635,Q63617,Q68G31,Q91XN4                                           |
| 3008 | 1,3,4,5,6,7<br>,8,37          | 2,33,34,35<br>,36,38,39,<br>40 | 22 | D3ZUC6,O35568,P11598,P19218,P22273,P23593,P47967,P48032,P49134,P55091,P63029,P97829,P97840,P98089,Q05702,Q09030,Q4AEF8,Q5I0D1,Q62635,Q63617,Q91XN4,Q99041 |
| 3009 | 1,3,4,5,6,7<br>,8,38          | 2,33,34,35<br>,36,37,39,<br>40 | 12 | D3ZUC6,O35568,O70417,P19218,P22273,P35280,P36374,Q09030,Q4AEF8,Q6IG05,Q6P6Q2,Q91XN4                                                                       |
| 3010 | 1,3,4,5,6,7<br>,8,39          | 2,33,34,35<br>,36,37,38,<br>40 | 11 | D3ZUC6,P22273,P23593,P36374,P36376,P63029,Q09030,Q4AEF8,Q68G31,Q9R168,Q9Z1F2                                                                              |



|      |                       |                                |    |                                                                                                          |
|------|-----------------------|--------------------------------|----|----------------------------------------------------------------------------------------------------------|
| 3011 | 1,3,4,5,6,7<br>,8,40  | 2,33,34,35<br>,36,37,38,<br>39 | 12 | D3ZUC6,O35568,P22273,P23593,P25809,P36374,P49134,Q09030,Q4AEF8,Q68G31,Q91XN4,Q99041                      |
| 3012 | 1,3,4,5,6,7<br>,33,34 | 2,8,35,36,<br>37,38,39,4<br>0  | 7  | P08721,P98089,Q09030,Q5I0D7,Q62635,Q68G31,Q91XN4                                                         |
| 3013 | 1,3,4,5,6,7<br>,33,35 | 2,8,34,36,<br>37,38,39,4<br>0  | 7  | P08721,P62804,P97840,Q09030,Q4AEF8,Q5I0D7,Q8CIZ5                                                         |
| 3014 | 1,3,4,5,6,7<br>,33,36 | 2,8,34,35,<br>37,38,39,4<br>0  | 15 | P01681,P08721,P11883,P25809,P47967,P52590,P55091,P97840,P98089,Q09030,Q5I0D7,Q62635,Q8CIZ5,Q91XN4,Q923V8 |
| 3015 | 1,3,4,5,6,7<br>,33,37 | 2,8,34,35,<br>36,38,39,4<br>0  | 10 | P11598,P25809,P47967,P55091,P97840,P98089,Q09030,Q4AEF8,Q62635,Q8CIZ5                                    |
| 3016 | 1,3,4,5,6,7<br>,33,38 | 2,8,34,35,<br>36,37,39,4<br>0  | 4  | P25809,P50116,Q09030,Q923V8                                                                              |
| 3017 | 1,3,4,5,6,7<br>,33,39 | 2,8,34,35,<br>36,37,38,4<br>0  | 6  | P25809,Q09030,Q4AEF8,Q5RKI1,Q6AYQ8,Q9QX79                                                                |
| 3018 | 1,3,4,5,6,7<br>,33,40 | 2,8,34,35,<br>36,37,38,3<br>9  | 4  | P25809,Q09030,Q4AEF8,Q91XN4                                                                              |
| 3019 | 1,3,4,5,6,7<br>,34,35 | 2,8,33,36,<br>37,38,39,4<br>0  | 5  | P36374,P97840,Q5I0D7,Q68G31,Q9QWN8                                                                       |
| 3020 | 1,3,4,5,6,7<br>,34,36 | 2,8,33,35,<br>37,38,39,4<br>0  | 10 | P11883,P47967,P55091,P97840,P98089,Q5I0D7,Q62635,Q68G31,Q91XN4,Q9QWN8                                    |
| 3021 | 1,3,4,5,6,7<br>,34,37 | 2,8,33,35,<br>36,38,39,4<br>0  | 9  | P11598,P47967,P49134,P55091,P97840,P98089,Q62635,Q68G31,Q8CIZ5                                           |
| 3022 | 1,3,4,5,6,7<br>,34,38 | 2,8,33,35,<br>36,37,39,4<br>0  | 5  | P01946,P02091,P36374,Q68G31,Q9QWN8                                                                       |
| 3023 | 1,3,4,5,6,7<br>,34,39 | 2,8,33,35,<br>36,37,38,4<br>0  | 4  | P63029,Q68G31,Q9QX79,Q9Z1F2                                                                              |

|      |                       |                               |                                                                                                                        |
|------|-----------------------|-------------------------------|------------------------------------------------------------------------------------------------------------------------|
| 3024 | 1,3,4,5,6,7<br>,34,40 | 2,8,33,35,<br>36,37,38,3<br>9 | 2 P49134,Q68G31                                                                                                        |
| 3025 | 1,3,4,5,6,7<br>,35,36 | 2,8,33,34,<br>37,38,39,4<br>0 | 10 P19132,P19218,P47967,P55091,P97840,Q5I0D1,Q5I0D7,Q68G31,Q8CIZ5,Q9QWN8                                               |
| 3026 | 1,3,4,5,6,7<br>,35,37 | 2,8,33,34,<br>36,38,39,4<br>0 | 9 P19132,P19218,P47967,P55091,P97840,Q4AEF8,Q5I0D1,Q8CIZ5,Q99041                                                       |
| 3027 | 1,3,4,5,6,7<br>,35,38 | 2,8,33,34,<br>36,37,39,4<br>0 | 4 P19218,P36374,P97840,Q9QWN8                                                                                          |
| 3028 | 1,3,4,5,6,7<br>,35,39 | 2,8,33,34,<br>36,37,38,4<br>0 | 3 P36374,P63029,Q4AEF8                                                                                                 |
| 3029 | 1,3,4,5,6,7<br>,35,40 | 2,8,33,34,<br>36,37,38,3<br>9 | 5 P19132,P25809,P36374,Q4AEF8,Q9QWN8                                                                                   |
| 3030 | 1,3,4,5,6,7<br>,36,37 | 2,8,33,34,<br>35,38,39,4<br>0 | 16 P09656,P11598,P11883,P19132,P19218,P25809,P47967,P55091,P97829,P97840,P98089,Q5I0D1<br>,Q62635,Q63617,Q8CIZ5,Q8CJD3 |
| 3031 | 1,3,4,5,6,7<br>,36,38 | 2,8,33,34,<br>35,37,39,4<br>0 | 6 P19218,P25809,P47967,P97840,Q923V8,Q9QWN8                                                                            |
| 3032 | 1,3,4,5,6,7<br>,36,39 | 2,8,33,34,<br>35,37,38,4<br>0 | 5 P25809,P63029,P97840,Q68G31,Q9QWN8                                                                                   |
| 3033 | 1,3,4,5,6,7<br>,36,40 | 2,8,33,34,<br>35,37,38,3<br>9 | 5 P25809,P52590,P97840,Q68G31,Q9QWN8                                                                                   |
| 3034 | 1,3,4,5,6,7<br>,37,38 | 2,8,33,34,<br>35,36,39,4<br>0 | 4 D3ZUC6,P19218,P25809,P97840                                                                                          |
| 3035 | 1,3,4,5,6,7<br>,37,39 | 2,8,33,34,<br>35,36,38,4<br>0 | 4 D3ZUC6,P25809,P63029,Q4AEF8                                                                                          |
| 3036 | 1,3,4,5,6,7<br>,37,40 | 2,8,33,34,<br>35,36,38,3<br>9 | 6 D3ZUC6,P19132,P25809,P49134,P82471,Q99041                                                                            |

|      |                       |                               |                                                                          |
|------|-----------------------|-------------------------------|--------------------------------------------------------------------------|
| 3037 | 1,3,4,5,6,7<br>,38,39 | 2,8,33,34,<br>35,36,37,4<br>0 | 4 D3ZUC6,P25809,P36374,Q9QX79                                            |
| 3038 | 1,3,4,5,6,7<br>,38,40 | 2,8,33,34,<br>35,36,37,3<br>9 | 5 D3ZUC6,P25809,P36374,Q6P6R2,Q9QWN8                                     |
| 3039 | 1,3,4,5,6,7<br>,39,40 | 2,8,33,34,<br>35,36,37,3<br>8 | 3 D3ZUC6,P25809,Q68G31                                                   |
| 3040 | 1,3,4,5,6,8<br>,33,34 | 2,7,35,36,<br>37,38,39,4<br>0 | 8 P42854,P98089,Q05702,Q09030,Q5I0D7,Q62635,Q63475,Q91XN4                |
| 3041 | 1,3,4,5,6,8<br>,33,35 | 2,7,34,36,<br>37,38,39,4<br>0 | 4 P01681,P62804,Q09030,Q64093                                            |
| 3042 | 1,3,4,5,6,8<br>,33,36 | 2,7,34,35,<br>37,38,39,4<br>0 | 9 O54728,P01681,P42854,P55091,P98089,Q05702,Q09030,Q62635,Q91XN4         |
| 3043 | 1,3,4,5,6,8<br>,33,37 | 2,7,34,35,<br>36,38,39,4<br>0 | 5 P55091,P98089,Q05702,Q09030,Q62635                                     |
| 3044 | 1,3,4,5,6,8<br>,33,38 | 2,7,34,35,<br>36,37,39,4<br>0 | 5 O70417,Q05702,Q09030,Q6IG05,Q6P6Q2                                     |
| 3045 | 1,3,4,5,6,8<br>,33,39 | 2,7,34,35,<br>36,37,38,4<br>0 | 7 P01681,P23593,P36376,P62804,Q05702,Q09030,Q9R168                       |
| 3046 | 1,3,4,5,6,8<br>,33,40 | 2,7,34,35,<br>36,37,38,3<br>9 | 7 P01681,P25031,P25809,P42854,Q05702,Q09030,Q91XN4                       |
| 3047 | 1,3,4,5,6,8<br>,34,35 | 2,7,33,36,<br>37,38,39,4<br>0 | 3 P36374,P48199,Q5I0D7                                                   |
| 3048 | 1,3,4,5,6,8<br>,34,36 | 2,7,33,35,<br>37,38,39,4<br>0 | 10 P08649,P48199,P55091,P98089,Q05702,Q09030,Q5I0D7,Q62635,Q68G31,Q91XN4 |
| 3049 | 1,3,4,5,6,8<br>,34,37 | 2,7,33,35,<br>36,38,39,4<br>0 | 7 P49134,P55091,P98089,Q05702,Q62635,Q6IFW6,Q6IG02                       |

|      |                       |                               |                                                                  |
|------|-----------------------|-------------------------------|------------------------------------------------------------------|
| 3050 | 1,3,4,5,6,8<br>,34,38 | 2,7,33,35,<br>36,37,39,4<br>0 | 8 P01946,P02091,P97580,Q05702,Q30KJ2,Q6IFW6,Q6IG05,Q6P6Q2        |
| 3051 | 1,3,4,5,6,8<br>,34,39 | 2,7,33,35,<br>36,37,38,4<br>0 | 4 P36376,Q05702,Q68G31,Q9R168                                    |
| 3052 | 1,3,4,5,6,8<br>,34,40 | 2,7,33,35,<br>36,37,38,3<br>9 | 7 P15399,P49134,P97580,Q05702,Q30KJ2,Q68G31,Q91XN4               |
| 3053 | 1,3,4,5,6,8<br>,35,36 | 2,7,33,34,<br>37,38,39,4<br>0 | 8 P01039,P17475,P19218,P55091,P97840,Q09030,Q64093,Q8VD89        |
| 3054 | 1,3,4,5,6,8<br>,35,37 | 2,7,33,34,<br>36,38,39,4<br>0 | 9 P01039,P19132,P19218,P23593,P55091,P80299,P82471,Q64093,Q6DGG1 |
| 3055 | 1,3,4,5,6,8<br>,35,38 | 2,7,33,34,<br>36,37,39,4<br>0 | 4 O70417,P19218,P36374,Q8VD89                                    |
| 3056 | 1,3,4,5,6,8<br>,35,39 | 2,7,33,34,<br>36,37,38,4<br>0 | 6 P23593,P30919,P36376,P54921,P62804,Q9R168                      |
| 3057 | 1,3,4,5,6,8<br>,35,40 | 2,7,33,34,<br>36,37,38,3<br>9 | 4 P36374,P54921,P82471,Q64093                                    |
| 3058 | 1,3,4,5,6,8<br>,36,37 | 2,7,33,34,<br>35,38,39,4<br>0 | 9 P01039,P09656,P19218,P55091,P82471,P97829,P97840,P98089,Q62635 |
| 3059 | 1,3,4,5,6,8<br>,36,38 | 2,7,33,34,<br>35,37,39,4<br>0 | 1 P19218                                                         |
| 3060 | 1,3,4,5,6,8<br>,36,39 | 2,7,33,34,<br>35,37,38,4<br>0 | 4 P36376,P63029,P97829,Q9R168                                    |
| 3061 | 1,3,4,5,6,8<br>,36,40 | 2,7,33,34,<br>35,37,38,3<br>9 | 6 P25809,P52590,P82471,P97829,Q09030,Q91XN4                      |
| 3062 | 1,3,4,5,6,8<br>,37,38 | 2,7,33,34,<br>35,36,39,4<br>0 | 7 D3ZUC6,P19218,P49134,Q6IFW6,Q6IG02,Q6IG05,Q6P6Q2               |

|      |                        |                               |                                                                                                      |
|------|------------------------|-------------------------------|------------------------------------------------------------------------------------------------------|
| 3063 | 1,3,4,5,6,8<br>,37,39  | 2,7,33,34,<br>35,36,38,4<br>0 | 10 D3ZUC6,P23593,P30919,P49134,P63029,P80299,P82471,P97829,Q6IG02,Q9R168                             |
| 3064 | 1,3,4,5,6,8<br>,37,40  | 2,7,33,34,<br>35,36,38,3<br>9 | 5 D3ZUC6,P49134,P80299,P82471,Q9QW07                                                                 |
| 3065 | 1,3,4,5,6,8<br>,38,39  | 2,7,33,34,<br>35,36,37,4<br>0 | 4 D3ZUC6,P36376,Q6P6Q2,Q9R168                                                                        |
| 3066 | 1,3,4,5,6,8<br>,38,40  | 2,7,33,34,<br>35,36,37,3<br>9 | 4 D3ZUC6,P25031,P82471,Q6P6Q2                                                                        |
| 3067 | 1,3,4,5,6,8<br>,39,40  | 2,7,33,34,<br>35,36,37,3<br>8 | 7 D3ZUC6,P23593,P25031,P36376,P54921,P82471,Q9R168                                                   |
| 3068 | 1,3,4,5,6,3<br>3,34,35 | 2,7,8,36,3<br>7,38,39,40      | 4 P08721,P62804,Q5I0D7,Q62635                                                                        |
| 3069 | 1,3,4,5,6,3<br>3,34,36 | 2,7,8,35,3<br>7,38,39,40      | 9 P08494,P08721,P11883,P55091,P97584,P98089,Q09030,Q5I0D7,Q62635                                     |
| 3070 | 1,3,4,5,6,3<br>3,34,37 | 2,7,8,35,3<br>6,38,39,40      | 6 P11883,P55091,P98089,Q5I0D7,Q62635,Q8CIZ5                                                          |
| 3071 | 1,3,4,5,6,3<br>3,34,38 | 2,7,8,35,3<br>6,37,39,40      | 2 P01946,P02091                                                                                      |
| 3072 | 1,3,4,5,6,3<br>3,34,39 | 2,7,8,35,3<br>6,37,38,40      | 1 Q62635                                                                                             |
| 3073 | 1,3,4,5,6,3<br>3,34,40 | 2,7,8,35,3<br>6,37,38,39      | 0                                                                                                    |
| 3074 | 1,3,4,5,6,3<br>3,35,36 | 2,7,8,34,3<br>7,38,39,40      | 14 D4A5U3,P01681,P08721,P09656,P11883,P55091,P62804,P97840,Q09030,Q5I0D7,Q62635,Q64093,Q8CIZ5,Q8VD89 |
| 3075 | 1,3,4,5,6,3<br>3,35,37 | 2,7,8,34,3<br>6,38,39,40      | 5 D4A5U3,P62804,Q62635,Q64093,Q8CIZ5                                                                 |
| 3076 | 1,3,4,5,6,3<br>3,35,38 | 2,7,8,34,3<br>6,37,39,40      | 2 P62804,Q812E4                                                                                      |
| 3077 | 1,3,4,5,6,3<br>3,35,39 | 2,7,8,34,3<br>6,37,38,40      | 4 P30919,P62804,Q00715,Q811M5                                                                        |
| 3078 | 1,3,4,5,6,3<br>3,35,40 | 2,7,8,34,3<br>6,37,38,39      | 5 P01681,P25809,P62804,Q00715,Q64093                                                                 |
| 3079 | 1,3,4,5,6,3<br>3,36,37 | 2,7,8,34,3<br>5,38,39,40      | 12 D4A5U3,P00774,P09656,P11883,P25809,P55091,P97584,P97840,P98089,Q09030,Q62635,Q8CIZ5               |
| 3080 | 1,3,4,5,6,3<br>3,36,38 | 2,7,8,34,3<br>5,37,39,40      | 6 P01681,P09656,P25809,P62804,Q09030,Q923V8                                                          |

|      |                        |                          |    |                                                                       |
|------|------------------------|--------------------------|----|-----------------------------------------------------------------------|
| 3081 | 1,3,4,5,6,3<br>3,36,39 | 2,7,8,34,3<br>5,37,38,40 | 5  | P01681,P25809,P62804,Q09030,Q62635                                    |
| 3082 | 1,3,4,5,6,3<br>3,36,40 | 2,7,8,34,3<br>5,37,38,39 | 8  | P01681,P11883,P25809,P52590,P62804,Q09030,Q9WTT6,Q9Z0V6               |
| 3083 | 1,3,4,5,6,3<br>3,37,38 | 2,7,8,34,3<br>5,36,39,40 | 1  | P25809                                                                |
| 3084 | 1,3,4,5,6,3<br>3,37,39 | 2,7,8,34,3<br>5,36,38,40 | 3  | P25809,P62804,Q62635                                                  |
| 3085 | 1,3,4,5,6,3<br>3,37,40 | 2,7,8,34,3<br>5,36,38,39 | 1  | P25809                                                                |
| 3086 | 1,3,4,5,6,3<br>3,38,39 | 2,7,8,34,3<br>5,36,37,40 | 2  | P25809,P62804                                                         |
| 3087 | 1,3,4,5,6,3<br>3,38,40 | 2,7,8,34,3<br>5,36,37,39 | 4  | P25809,P62804,Q00715,Q6P6R2                                           |
| 3088 | 1,3,4,5,6,3<br>3,39,40 | 2,7,8,34,3<br>5,36,37,38 | 3  | P25809,P62804,Q00715                                                  |
| 3089 | 1,3,4,5,6,3<br>4,35,36 | 2,7,8,33,3<br>7,38,39,40 | 7  | P11883,P55091,P97840,Q5I0D7,Q62635,Q68G31,Q9QWN8                      |
| 3090 | 1,3,4,5,6,3<br>4,35,37 | 2,7,8,33,3<br>6,38,39,40 | 4  | P55091,Q62635,Q64093,Q8CIZ5                                           |
| 3091 | 1,3,4,5,6,3<br>4,35,38 | 2,7,8,33,3<br>6,37,39,40 | 4  | P01946,P02091,Q812E4,Q9QWN8                                           |
| 3092 | 1,3,4,5,6,3<br>4,35,39 | 2,7,8,33,3<br>6,37,38,40 | 1  | P30919                                                                |
| 3093 | 1,3,4,5,6,3<br>4,35,40 | 2,7,8,33,3<br>6,37,38,39 | 1  | Q64093                                                                |
| 3094 | 1,3,4,5,6,3<br>4,36,37 | 2,7,8,33,3<br>5,38,39,40 | 10 | P09656,P11883,P47967,P55091,P97584,P97840,P98089,Q4KLZ6,Q62635,Q8CIZ5 |
| 3095 | 1,3,4,5,6,3<br>4,36,38 | 2,7,8,33,3<br>5,37,39,40 | 4  | P01946,P02091,Q4KLZ6,Q9QWN8                                           |
| 3096 | 1,3,4,5,6,3<br>4,36,39 | 2,7,8,33,3<br>5,37,38,40 | 2  | Q62635,Q68G31                                                         |
| 3097 | 1,3,4,5,6,3<br>4,36,40 | 2,7,8,33,3<br>5,37,38,39 | 2  | P11883,Q68G31                                                         |
| 3098 | 1,3,4,5,6,3<br>4,37,38 | 2,7,8,33,3<br>5,36,39,40 | 5  | P01946,P02091,P49134,Q4KLZ6,Q6IG02                                    |
| 3099 | 1,3,4,5,6,3<br>4,37,39 | 2,7,8,33,3<br>5,36,38,40 | 3  | P49134,P63029,Q62635                                                  |
| 3100 | 1,3,4,5,6,3<br>4,37,40 | 2,7,8,33,3<br>5,36,38,39 | 2  | P49134,Q4KLZ6                                                         |

|      |                        |                          |    |                                                                                     |
|------|------------------------|--------------------------|----|-------------------------------------------------------------------------------------|
| 3101 | 1,3,4,5,6,3<br>4,38,39 | 2,7,8,33,3<br>5,36,37,40 | 2  | P01946,P02091                                                                       |
| 3102 | 1,3,4,5,6,3<br>4,38,40 | 2,7,8,33,3<br>5,36,37,39 | 3  | P01946,P02091,Q4KLZ6                                                                |
| 3103 | 1,3,4,5,6,3<br>4,39,40 | 2,7,8,33,3<br>5,36,37,38 | 1  | Q68G31                                                                              |
| 3104 | 1,3,4,5,6,3<br>5,36,37 | 2,7,8,33,3<br>4,38,39,40 | 12 | D4A5U3,P01039,P09656,P11883,P19132,P19218,P47967,P55091,P97840,Q62635,Q64093,Q8CIZ5 |
| 3105 | 1,3,4,5,6,3<br>5,36,38 | 2,7,8,33,3<br>4,37,39,40 | 7  | P09656,P19218,P21674,P62804,Q8VD89,Q923V8,Q9QWN8                                    |
| 3106 | 1,3,4,5,6,3<br>5,36,39 | 2,7,8,33,3<br>4,37,38,40 | 2  | P23739,P62804                                                                       |
| 3107 | 1,3,4,5,6,3<br>5,36,40 | 2,7,8,33,3<br>4,37,38,39 | 8  | P02793;Q7TP54,P11883,P19132,P25809,P53792,P62804,Q64093,Q9QWN8                      |
| 3108 | 1,3,4,5,6,3<br>5,37,38 | 2,7,8,33,3<br>4,36,39,40 | 3  | P19218,Q64093,Q9QX74                                                                |
| 3109 | 1,3,4,5,6,3<br>5,37,39 | 2,7,8,33,3<br>4,36,38,40 | 1  | P30919                                                                              |
| 3110 | 1,3,4,5,6,3<br>5,37,40 | 2,7,8,33,3<br>4,36,38,39 | 5  | P19132,P25809,P82471,Q64093,Q9QX74                                                  |
| 3111 | 1,3,4,5,6,3<br>5,38,39 | 2,7,8,33,3<br>4,36,37,40 | 8  | P08723,P24368,P30120,P30919,P47727,P62804,Q00715,Q6P6R2                             |
| 3112 | 1,3,4,5,6,3<br>5,38,40 | 2,7,8,33,3<br>4,36,37,39 | 3  | Q00715,Q6P6R2,Q9QX74                                                                |
| 3113 | 1,3,4,5,6,3<br>5,39,40 | 2,7,8,33,3<br>4,36,37,38 | 7  | P08723,P25809,P30919,P54921,P62804,P82471,Q00715                                    |
| 3114 | 1,3,4,5,6,3<br>6,37,38 | 2,7,8,33,3<br>4,35,39,40 | 5  | P09656,P19218,P25809,P97840,Q4KLZ6                                                  |
| 3115 | 1,3,4,5,6,3<br>6,37,39 | 2,7,8,33,3<br>4,35,38,40 | 5  | P09656,P25809,P63029,P97829,Q62635                                                  |
| 3116 | 1,3,4,5,6,3<br>6,37,40 | 2,7,8,33,3<br>4,35,38,39 | 7  | P09656,P11883,P19132,P25809,P82471,Q9QX74,Q9Z0V6                                    |
| 3117 | 1,3,4,5,6,3<br>6,38,39 | 2,7,8,33,3<br>4,35,37,40 | 2  | P25809,Q923V8                                                                       |
| 3118 | 1,3,4,5,6,3<br>6,38,40 | 2,7,8,33,3<br>4,35,37,39 | 4  | P25809,Q9QWN8,Q9QX74,Q9Z0V6                                                         |
| 3119 | 1,3,4,5,6,3<br>6,39,40 | 2,7,8,33,3<br>4,35,37,38 | 2  | P25809,P54921                                                                       |
| 3120 | 1,3,4,5,6,3<br>7,38,39 | 2,7,8,33,3<br>4,35,36,40 | 2  | P30919,Q9QX74                                                                       |

|      |                        |                               |    |                                                                                                                 |
|------|------------------------|-------------------------------|----|-----------------------------------------------------------------------------------------------------------------|
| 3121 | 1,3,4,5,6,3<br>7,38,40 | 2,7,8,33,3<br>4,35,36,39      | 5  | D3ZUC6,P25809,P82471,Q4KLZ6,Q9QX74                                                                              |
| 3122 | 1,3,4,5,6,3<br>7,39,40 | 2,7,8,33,3<br>4,35,36,38      | 5  | D3ZUC6,P25809,P30919,P82471,Q9QX74                                                                              |
| 3123 | 1,3,4,5,6,3<br>8,39,40 | 2,7,8,33,3<br>4,35,36,37      | 7  | P08723,P25809,P51740,P54921,Q00715,Q6P6R2,Q9QX74                                                                |
| 3124 | 1,3,4,5,7,8<br>,33,34  | 2,6,35,36,<br>37,38,39,4<br>0 | 15 | B1H234,P01681,P08721,P11030,P47967,P51740,P55091,P97840,P98089,Q05511,Q62635,Q63475,Q68G31,Q6IFW6,Q9QX74        |
| 3125 | 1,3,4,5,7,8<br>,33,35  | 2,6,34,36,<br>37,38,39,4<br>0 | 5  | P01681,P19629,P48032,P51740,P97840                                                                              |
| 3126 | 1,3,4,5,7,8<br>,33,36  | 2,6,34,35,<br>37,38,39,4<br>0 | 9  | O54728,P01681,P08721,P47967,P51740,P55091,P97840,P98089,Q62635                                                  |
| 3127 | 1,3,4,5,7,8<br>,33,37  | 2,6,34,35,<br>36,38,39,4<br>0 | 9  | P47967,P48032,P51740,P55091,P97840,P98089,Q62635,Q6AYQ8,Q6IFW6                                                  |
| 3128 | 1,3,4,5,7,8<br>,33,38  | 2,6,34,35,<br>36,37,39,4<br>0 | 7  | B1H234,O70417,P01681,P35280,Q6IFW6,Q6IG05,Q6P6Q2                                                                |
| 3129 | 1,3,4,5,7,8<br>,33,39  | 2,6,34,35,<br>36,37,38,4<br>0 | 4  | D3ZTE0,P01681,Q5RKI1,Q6AYQ8                                                                                     |
| 3130 | 1,3,4,5,7,8<br>,33,40  | 2,6,34,35,<br>36,37,38,3<br>9 | 1  | P01681                                                                                                          |
| 3131 | 1,3,4,5,7,8<br>,34,35  | 2,6,33,36,<br>37,38,39,4<br>0 | 9  | P01039,P36860,P47967,P51740,P55091,P97840,Q05511,Q68G31,Q9Z1F2                                                  |
| 3132 | 1,3,4,5,7,8<br>,34,36  | 2,6,33,35,<br>37,38,39,4<br>0 | 12 | B1H234,P01039,P47967,P51740,P55091,P97840,P98089,Q05511,Q5I0D1,Q62635,Q68G31,Q9Z1F2                             |
| 3133 | 1,3,4,5,7,8<br>,34,37  | 2,6,33,35,<br>36,38,39,4<br>0 | 16 | P01039,P06760,P47967,P49134,P51740,P55091,P63029,P97840,P98089,Q5I0D1,Q62635,Q68G31,Q6IFW6,Q6IG02,Q6IMF3,Q6P6Q2 |
| 3134 | 1,3,4,5,7,8<br>,34,38  | 2,6,33,35,<br>36,37,39,4<br>0 | 14 | B1H234,O70417,P01946,P02091,P35280,P49134,Q05511,Q4FZU2,Q68G31,Q6IFW6,Q6IG05,Q6IMF3,Q6P6Q2,Q9EQS0               |



|      |                       |                               |    |                                                                                                       |
|------|-----------------------|-------------------------------|----|-------------------------------------------------------------------------------------------------------|
| 3135 | 1,3,4,5,7,8<br>,34,39 | 2,6,33,35,<br>36,37,38,4<br>0 | 6  | P49134,P63029,Q68G31,Q6IFW6,Q9Z0V6,Q9Z1F2                                                             |
| 3136 | 1,3,4,5,7,8<br>,34,40 | 2,6,33,35,<br>36,37,38,3<br>9 | 3  | P49134,Q68G31,Q6IFW6                                                                                  |
| 3137 | 1,3,4,5,7,8<br>,35,36 | 2,6,33,34,<br>37,38,39,4<br>0 | 9  | P01039,P19218,P47967,P51740,P55091,P97829,P97840,Q5I0D1,Q68G31                                        |
| 3138 | 1,3,4,5,7,8<br>,35,37 | 2,6,33,34,<br>36,38,39,4<br>0 | 12 | P01039,P19132,P19218,P36860,P47967,P48032,P51740,P55091,P63029,P97840,Q5I0D1,Q6DG<br>G1               |
| 3139 | 1,3,4,5,7,8<br>,35,38 | 2,6,33,34,<br>36,37,39,4<br>0 | 7  | O70417,P19218,P35280,P36374,P97840,Q6DGG1,Q6P6Q2                                                      |
| 3140 | 1,3,4,5,7,8<br>,35,39 | 2,6,33,34,<br>36,37,38,4<br>0 | 4  | P01039,P36860,P63029,Q9Z1F2                                                                           |
| 3141 | 1,3,4,5,7,8<br>,35,40 | 2,6,33,34,<br>36,37,38,3<br>9 | 1  | Q68G31                                                                                                |
| 3142 | 1,3,4,5,7,8<br>,36,37 | 2,6,33,34,<br>35,38,39,4<br>0 | 14 | D3ZUC6,P01039,P19218,P47967,P49134,P51740,P55091,P63029,P97829,P97840,P98089,Q5I0D<br>1,Q62635,Q68G31 |
| 3143 | 1,3,4,5,7,8<br>,36,38 | 2,6,33,34,<br>35,37,39,4<br>0 | 5  | O70417,P19218,P35280,P47967,P97840                                                                    |
| 3144 | 1,3,4,5,7,8<br>,36,39 | 2,6,33,34,<br>35,37,38,4<br>0 | 7  | D3ZUC6,P01039,P63029,P97829,P97840,Q68G31,Q9Z1F2                                                      |
| 3145 | 1,3,4,5,7,8<br>,36,40 | 2,6,33,34,<br>35,37,38,3<br>9 | 4  | D3ZUC6,P97829,P97840,Q68G31                                                                           |
| 3146 | 1,3,4,5,7,8<br>,37,38 | 2,6,33,34,<br>35,36,39,4<br>0 | 12 | D3ZUC6,P19218,P22006,P35280,P49134,P97840,Q4FZU2,Q6IFW6,Q6IG02,Q6IMF3,Q6P6Q2,Q9<br>EQS0               |
| 3147 | 1,3,4,5,7,8<br>,37,39 | 2,6,33,34,<br>35,36,38,4<br>0 | 8  | D3ZUC6,P01039,P49134,P63029,P97829,Q6AYQ8,Q6IFW6,Q6IG02                                               |

|      |                        |                               |                                                                                 |
|------|------------------------|-------------------------------|---------------------------------------------------------------------------------|
| 3148 | 1,3,4,5,7,8<br>,37,40  | 2,6,33,34,<br>35,36,38,3<br>9 | 5 D3ZUC6,P49134,P97829,P97840,Q6IFW6                                            |
| 3149 | 1,3,4,5,7,8<br>,38,39  | 2,6,33,34,<br>35,36,37,4<br>0 | 5 D3ZUC6,P35280,Q6IFW6,Q6P6Q2,Q9EQS0                                            |
| 3150 | 1,3,4,5,7,8<br>,38,40  | 2,6,33,34,<br>35,36,37,3<br>9 | 7 D3ZUC6,O70417,P35280,P49134,Q6IFW6,Q6IMF3,Q6P6Q2                              |
| 3151 | 1,3,4,5,7,8<br>,39,40  | 2,6,33,34,<br>35,36,37,3<br>8 | 6 D3ZUC6,O89117,P49134,P63029,Q68G31,Q9R168                                     |
| 3152 | 1,3,4,5,7,3<br>3,34,35 | 2,6,8,36,3<br>7,38,39,40      | 10 P08721,P12020,P19629,P47967,P51740,P97840,Q5GRG2,Q5I0D7,Q62635,Q68G31        |
| 3153 | 1,3,4,5,7,3<br>3,34,36 | 2,6,8,35,3<br>7,38,39,40      | 11 P01681,P08721,P47967,P51740,P55091,P97840,P98089,Q5EGZ1,Q5I0D7,Q62635,Q68G31 |
| 3154 | 1,3,4,5,7,3<br>3,34,37 | 2,6,8,35,3<br>6,38,39,40      | 9 P47967,P51740,P55091,P97840,P98089,Q62635,Q68G31,Q6AYQ8,Q8CIZ5                |
| 3155 | 1,3,4,5,7,3<br>3,34,38 | 2,6,8,35,3<br>6,37,39,40      | 4 P01946,P02091,P08721,Q6P6S4                                                   |
| 3156 | 1,3,4,5,7,3<br>3,34,39 | 2,6,8,35,3<br>6,37,38,40      | 3 Q5RKI1,Q68G31,Q6AYQ8                                                          |
| 3157 | 1,3,4,5,7,3<br>3,34,40 | 2,6,8,35,3<br>6,37,38,39      | 1 Q68G31                                                                        |
| 3158 | 1,3,4,5,7,3<br>3,35,36 | 2,6,8,34,3<br>7,38,39,40      | 10 D4A5U3,P01681,P08721,P12020,P47967,P51740,P55091,P97840,Q5I0D7,Q62635        |
| 3159 | 1,3,4,5,7,3<br>3,35,37 | 2,6,8,34,3<br>6,38,39,40      | 6 P47967,P51740,P55091,P97840,Q62635,Q8CIZ5                                     |
| 3160 | 1,3,4,5,7,3<br>3,35,38 | 2,6,8,34,3<br>6,37,39,40      | 2 P12020,P97840                                                                 |
| 3161 | 1,3,4,5,7,3<br>3,35,39 | 2,6,8,34,3<br>6,37,38,40      | 3 P12020,P62804,Q5RKI1                                                          |
| 3162 | 1,3,4,5,7,3<br>3,35,40 | 2,6,8,34,3<br>6,37,38,39      | 2 P01681,P12020                                                                 |
| 3163 | 1,3,4,5,7,3<br>3,36,37 | 2,6,8,34,3<br>5,38,39,40      | 11 P00774,P01681,P25809,P47967,P51740,P55091,P97840,P98089,Q5EGZ1,Q62635,Q8CIZ5 |
| 3164 | 1,3,4,5,7,3<br>3,36,38 | 2,6,8,34,3<br>5,37,39,40      | 6 P01681,P08721,P25809,P47967,P97840,Q923V8                                     |
| 3165 | 1,3,4,5,7,3<br>3,36,39 | 2,6,8,34,3<br>5,37,38,40      | 4 P01681,P25809,P97840,Q5RKI1                                                   |

|      |                        |                          |    |                                                                              |
|------|------------------------|--------------------------|----|------------------------------------------------------------------------------|
| 3166 | 1,3,4,5,7,3<br>3,36,40 | 2,6,8,34,3<br>5,37,38,39 | 3  | P01681,P25809,P97840                                                         |
| 3167 | 1,3,4,5,7,3<br>3,37,38 | 2,6,8,34,3<br>5,36,39,40 | 2  | P47967,P97840                                                                |
| 3168 | 1,3,4,5,7,3<br>3,37,39 | 2,6,8,34,3<br>5,36,38,40 | 2  | Q5RKI1,Q6AYQ8                                                                |
| 3169 | 1,3,4,5,7,3<br>3,37,40 | 2,6,8,34,3<br>5,36,38,39 | 2  | P25809,P97840                                                                |
| 3170 | 1,3,4,5,7,3<br>3,38,39 | 2,6,8,34,3<br>5,36,37,40 | 2  | P02770,Q5RKI1                                                                |
| 3171 | 1,3,4,5,7,3<br>3,38,40 | 2,6,8,34,3<br>5,36,37,39 | 1  | P25809                                                                       |
| 3172 | 1,3,4,5,7,3<br>3,39,40 | 2,6,8,34,3<br>5,36,37,38 | 4  | P01681,P25809,Q5RKI1,Q6AYQ8                                                  |
| 3173 | 1,3,4,5,7,3<br>4,35,36 | 2,6,8,33,3<br>7,38,39,40 | 10 | P01039,P47967,P51740,P55091,P97840,Q5I0D1,Q5I0D7,Q62635,Q68G31,Q9QWN8        |
| 3174 | 1,3,4,5,7,3<br>4,35,37 | 2,6,8,33,3<br>6,38,39,40 | 8  | P01039,P47967,P51740,P55091,P97840,Q5I0D1,Q62635,Q68G31                      |
| 3175 | 1,3,4,5,7,3<br>4,35,38 | 2,6,8,33,3<br>6,37,39,40 | 5  | P01946,P02091,P97840,Q68G31,Q9QWN8                                           |
| 3176 | 1,3,4,5,7,3<br>4,35,39 | 2,6,8,33,3<br>6,37,38,40 | 4  | P12020,Q5GRG2,Q68G31,Q9Z1F2                                                  |
| 3177 | 1,3,4,5,7,3<br>4,35,40 | 2,6,8,33,3<br>6,37,38,39 | 1  | Q68G31                                                                       |
| 3178 | 1,3,4,5,7,3<br>4,36,37 | 2,6,8,33,3<br>5,38,39,40 | 11 | P01039,P47967,P49134,P51740,P55091,P97840,P98089,Q5EGZ1,Q5I0D1,Q62635,Q68G31 |
| 3179 | 1,3,4,5,7,3<br>4,36,38 | 2,6,8,33,3<br>5,37,39,40 | 6  | P01946,P02091,P47967,P97840,Q68G31,Q9QWN8                                    |
| 3180 | 1,3,4,5,7,3<br>4,36,39 | 2,6,8,33,3<br>5,37,38,40 | 5  | P63029,P97840,Q62635,Q68G31,Q9Z1F2                                           |
| 3181 | 1,3,4,5,7,3<br>4,36,40 | 2,6,8,33,3<br>5,37,38,39 | 4  | P47967,P97840,Q68G31,Q9QWN8                                                  |
| 3182 | 1,3,4,5,7,3<br>4,37,38 | 2,6,8,33,3<br>5,36,39,40 | 9  | P01946,P02091,P47967,P49134,P97840,Q68G31,Q6AY61,Q6IFW6,Q6IG02               |
| 3183 | 1,3,4,5,7,3<br>4,37,39 | 2,6,8,33,3<br>5,36,38,40 | 5  | P49134,P63029,Q62635,Q68G31,Q6AYQ8                                           |
| 3184 | 1,3,4,5,7,3<br>4,37,40 | 2,6,8,33,3<br>5,36,38,39 | 3  | P49134,P97840,Q68G31                                                         |
| 3185 | 1,3,4,5,7,3<br>4,38,39 | 2,6,8,33,3<br>5,36,37,40 | 3  | P01946,P02091,Q68G31                                                         |

|      |                        |                          |    |                                                                              |
|------|------------------------|--------------------------|----|------------------------------------------------------------------------------|
| 3186 | 1,3,4,5,7,3<br>4,38,40 | 2,6,8,33,3<br>5,36,37,39 | 5  | P01946,P02091,P49134,Q68G31,Q9QWN8                                           |
| 3187 | 1,3,4,5,7,3<br>4,39,40 | 2,6,8,33,3<br>5,36,37,38 | 3  | P10758,P49134,Q68G31                                                         |
| 3188 | 1,3,4,5,7,3<br>5,36,37 | 2,6,8,33,3<br>4,38,39,40 | 11 | P01039,P19132,P19218,P25031,P47967,P51740,P55091,P97840,Q5I0D1,Q62635,Q8CIZ5 |
| 3189 | 1,3,4,5,7,3<br>5,36,38 | 2,6,8,33,3<br>4,37,39,40 | 5  | P19218,P21674,P47967,P97840,Q9QWN8                                           |
| 3190 | 1,3,4,5,7,3<br>5,36,39 | 2,6,8,33,3<br>4,37,38,40 | 6  | P01039,P23739,P63029,P97840,Q68G31,Q9QWN8                                    |
| 3191 | 1,3,4,5,7,3<br>5,36,40 | 2,6,8,33,3<br>4,37,38,39 | 6  | P02793;Q7TP54,P19132,P25809,P97840,Q68G31,Q9QWN8                             |
| 3192 | 1,3,4,5,7,3<br>5,37,38 | 2,6,8,33,3<br>4,36,39,40 | 5  | P08649,P19218,P47967,P97840,Q99MH3                                           |
| 3193 | 1,3,4,5,7,3<br>5,37,39 | 2,6,8,33,3<br>4,36,38,40 | 4  | P01039,P08649,P63029,P97840                                                  |
| 3194 | 1,3,4,5,7,3<br>5,37,40 | 2,6,8,33,3<br>4,36,38,39 | 4  | P08649,P19132,P97840,Q99MH3                                                  |
| 3195 | 1,3,4,5,7,3<br>5,38,39 | 2,6,8,33,3<br>4,36,37,40 | 2  | P08649,P12020                                                                |
| 3196 | 1,3,4,5,7,3<br>5,38,40 | 2,6,8,33,3<br>4,36,37,39 | 5  | P08649,P10758,Q6P6R2,Q99MH3,Q9QWN8                                           |
| 3197 | 1,3,4,5,7,3<br>5,39,40 | 2,6,8,33,3<br>4,36,37,38 | 3  | O89117,P08649,P10758                                                         |
| 3198 | 1,3,4,5,7,3<br>6,37,38 | 2,6,8,33,3<br>4,35,39,40 | 4  | P19218,P47967,P97840,Q5I0D1                                                  |
| 3199 | 1,3,4,5,7,3<br>6,37,39 | 2,6,8,33,3<br>4,35,38,40 | 8  | O89117,P01039,P25809,P47967,P63029,P97829,P97840,Q62635                      |
| 3200 | 1,3,4,5,7,3<br>6,37,40 | 2,6,8,33,3<br>4,35,38,39 | 6  | P19132,P25809,P47967,P97829,P97840,Q68G31                                    |
| 3201 | 1,3,4,5,7,3<br>6,38,39 | 2,6,8,33,3<br>4,35,37,40 | 3  | O89117,P97840,Q9QWN8                                                         |
| 3202 | 1,3,4,5,7,3<br>6,38,40 | 2,6,8,33,3<br>4,35,37,39 | 3  | P25809,P97840,Q9QWN8                                                         |
| 3203 | 1,3,4,5,7,3<br>6,39,40 | 2,6,8,33,3<br>4,35,37,38 | 3  | O89117,P25809,Q68G31                                                         |
| 3204 | 1,3,4,5,7,3<br>7,38,39 | 2,6,8,33,3<br>4,35,36,40 | 3  | D3ZUC6,O89117,P08649                                                         |
| 3205 | 1,3,4,5,7,3<br>7,38,40 | 2,6,8,33,3<br>4,35,36,39 | 6  | D3ZUC6,O89117,P08649,P25809,P49134,Q99MH3                                    |

|      |                        |                          |    |                                                                                     |
|------|------------------------|--------------------------|----|-------------------------------------------------------------------------------------|
| 3206 | 1,3,4,5,7,3<br>7,39,40 | 2,6,8,33,3<br>4,35,36,38 | 6  | D3ZUC6,O89117,P08649,P25809,P49134,P63029                                           |
| 3207 | 1,3,4,5,7,3<br>8,39,40 | 2,6,8,33,3<br>4,35,36,37 | 6  | D3ZUC6,O89117,P02770,P08649,P10758,P25809                                           |
| 3208 | 1,3,4,5,8,3<br>3,34,35 | 2,6,7,36,3<br>7,38,39,40 | 7  | P00762,P01681,P01835,P19629,P51740,Q05511,Q63475                                    |
| 3209 | 1,3,4,5,8,3<br>3,34,36 | 2,6,7,35,3<br>7,38,39,40 | 8  | O54728,P00762,P01681,P51740,P55091,P98089,Q5I0D7,Q62635                             |
| 3210 | 1,3,4,5,8,3<br>3,34,37 | 2,6,7,35,3<br>6,38,39,40 | 8  | P51740,P55091,P98089,Q62635,Q6IFW6,Q6IG02,Q6IMF3,Q6P6Q2                             |
| 3211 | 1,3,4,5,8,3<br>3,34,38 | 2,6,7,35,3<br>6,37,39,40 | 12 | P00762,P01946,P02091,P02625,Q05511,Q4FZU2,Q63475,Q6IFU7,Q6IFW6,Q6IG05,Q6IMF3,Q6P6Q2 |
| 3212 | 1,3,4,5,8,3<br>3,34,39 | 2,6,7,35,3<br>6,37,38,40 | 4  | P01681,P02651,Q6IFU7,Q6IFW6                                                         |
| 3213 | 1,3,4,5,8,3<br>3,34,40 | 2,6,7,35,3<br>6,37,38,39 | 3  | P01681,Q63475,Q6IFU7                                                                |
| 3214 | 1,3,4,5,8,3<br>3,35,36 | 2,6,7,34,3<br>7,38,39,40 | 8  | O54728,P01681,P01835,P23739,P51740,P55091,P62804,P97840                             |
| 3215 | 1,3,4,5,8,3<br>3,35,37 | 2,6,7,34,3<br>6,38,39,40 | 3  | P01681,P51740,P55091                                                                |
| 3216 | 1,3,4,5,8,3<br>3,35,38 | 2,6,7,34,3<br>6,37,39,40 | 4  | O70417,P01681,P01835,Q6P6Q2                                                         |
| 3217 | 1,3,4,5,8,3<br>3,35,39 | 2,6,7,34,3<br>6,37,38,40 | 3  | P01681,P01835,P62804                                                                |
| 3218 | 1,3,4,5,8,3<br>3,35,40 | 2,6,7,34,3<br>6,37,38,39 | 3  | P01681,P01835,P62804                                                                |
| 3219 | 1,3,4,5,8,3<br>3,36,37 | 2,6,7,34,3<br>5,38,39,40 | 8  | O54728,P01681,P47967,P51740,P55091,P97840,P98089,Q62635                             |
| 3220 | 1,3,4,5,8,3<br>3,36,38 | 2,6,7,34,3<br>5,37,39,40 | 2  | O54728,P01681                                                                       |
| 3221 | 1,3,4,5,8,3<br>3,36,39 | 2,6,7,34,3<br>5,37,38,40 | 3  | O54728,P01681,Q9R168                                                                |
| 3222 | 1,3,4,5,8,3<br>3,36,40 | 2,6,7,34,3<br>5,37,38,39 | 2  | O54728,P01681                                                                       |
| 3223 | 1,3,4,5,8,3<br>3,37,38 | 2,6,7,34,3<br>5,36,39,40 | 6  | Q4FZU2,Q6IFW6,Q6IG02,Q6IG05,Q6IMF3,Q6P6Q2                                           |
| 3224 | 1,3,4,5,8,3<br>3,37,39 | 2,6,7,34,3<br>5,36,38,40 | 3  | P01681,Q6IFW6,Q6IG02                                                                |
| 3225 | 1,3,4,5,8,3<br>3,37,40 | 2,6,7,34,3<br>5,36,38,39 | 2  | P01681,Q6IFW6                                                                       |

|      |                        |                          |    |                                                                                    |
|------|------------------------|--------------------------|----|------------------------------------------------------------------------------------|
| 3226 | 1,3,4,5,8,3<br>3,38,39 | 2,6,7,34,3<br>5,36,37,40 | 4  | P01681,Q6IFU7,Q6IFW6,Q6P6Q2                                                        |
| 3227 | 1,3,4,5,8,3<br>3,38,40 | 2,6,7,34,3<br>5,36,37,39 | 5  | P01681,Q4FZU2,Q6IFU7,Q6IFW6,Q6P6Q2                                                 |
| 3228 | 1,3,4,5,8,3<br>3,39,40 | 2,6,7,34,3<br>5,36,37,38 | 2  | P01681,Q9R168                                                                      |
| 3229 | 1,3,4,5,8,3<br>4,35,36 | 2,6,7,33,3<br>7,38,39,40 | 5  | P01039,P51740,P55091,P97840,Q68G31                                                 |
| 3230 | 1,3,4,5,8,3<br>4,35,37 | 2,6,7,33,3<br>6,38,39,40 | 6  | P01039,P36860,P51740,P55091,Q6IFW6,Q6IG02                                          |
| 3231 | 1,3,4,5,8,3<br>4,35,38 | 2,6,7,33,3<br>6,37,39,40 | 7  | P01946,P02091,Q05511,Q6IFW6,Q6IG02,Q6IMF3,Q6P6Q2                                   |
| 3232 | 1,3,4,5,8,3<br>4,35,39 | 2,6,7,33,3<br>6,37,38,40 | 2  | P01039,P36860                                                                      |
| 3233 | 1,3,4,5,8,3<br>4,35,40 | 2,6,7,33,3<br>6,37,38,39 | 2  | P97580,Q68G31                                                                      |
| 3234 | 1,3,4,5,8,3<br>4,36,37 | 2,6,7,33,3<br>5,38,39,40 | 11 | P01039,P47967,P49134,P51740,P55091,P97840,P98089,Q62635,Q68G31,Q6IFW6,Q6IG02       |
| 3235 | 1,3,4,5,8,3<br>4,36,38 | 2,6,7,33,3<br>5,37,39,40 | 5  | P01946,P02091,P02625,Q6IFW6,Q6P6Q2                                                 |
| 3236 | 1,3,4,5,8,3<br>4,36,39 | 2,6,7,33,3<br>5,37,38,40 | 3  | P01039,Q68G31,Q9Z1F2                                                               |
| 3237 | 1,3,4,5,8,3<br>4,36,40 | 2,6,7,33,3<br>5,37,38,39 | 1  | Q68G31                                                                             |
| 3238 | 1,3,4,5,8,3<br>4,37,38 | 2,6,7,33,3<br>5,36,39,40 | 11 | P01946,P02091,P49134,Q4FZU2,Q6IFU8,Q6IFW6,Q6IG02,Q6IG05,Q6IMF3,Q6P6Q2,Q9EQS0       |
| 3239 | 1,3,4,5,8,3<br>4,37,39 | 2,6,7,33,3<br>5,36,38,40 | 6  | P01039,P49134,P63029,Q6IFW6,Q6IG02,Q6P6Q2                                          |
| 3240 | 1,3,4,5,8,3<br>4,37,40 | 2,6,7,33,3<br>5,36,38,39 | 6  | P49134,Q4FZU2,Q6IFW6,Q6IG02,Q6IMF3,Q6P6Q2                                          |
| 3241 | 1,3,4,5,8,3<br>4,38,39 | 2,6,7,33,3<br>5,36,37,40 | 9  | P01946,P02091,Q4FZU2,Q6IFU7,Q6IFW6,Q6IG02,Q6IMF3,Q6P6Q2,Q9EQS0                     |
| 3242 | 1,3,4,5,8,3<br>4,38,40 | 2,6,7,33,3<br>5,36,37,39 | 11 | P01946,P02091,P49134,P97580,Q30KJ2,Q4FZU2,Q6IFU7,Q6IFW6,Q6IG02,Q6IMF3,Q6P6Q2       |
| 3243 | 1,3,4,5,8,3<br>4,39,40 | 2,6,7,33,3<br>5,36,37,38 | 5  | P49134,P97580,Q68G31,Q6IFW6,Q9R168                                                 |
| 3244 | 1,3,4,5,8,3<br>5,36,37 | 2,6,7,33,3<br>4,38,39,40 | 12 | F1M3L7,P01039,P19132,P19218,P47967,P50116,P51740,P55091,P80299,P97829,P97840,Q5I0D |
| 3245 | 1,3,4,5,8,3<br>5,36,38 | 2,6,7,33,3<br>4,37,39,40 | 1  |                                                                                    |
|      |                        |                          | 2  | P19218,P21674                                                                      |

|      |                         |                          |    |                                                                                     |
|------|-------------------------|--------------------------|----|-------------------------------------------------------------------------------------|
| 3246 | 1,3,4,5,8,3<br>5,36,39  | 2,6,7,33,3<br>4,37,38,40 | 5  | P01039,P23739,P97829,Q62714,Q9R168                                                  |
| 3247 | 1,3,4,5,8,3<br>5,36,40  | 2,6,7,33,3<br>4,37,38,39 | 2  | P01681,P02793;Q7TP54                                                                |
| 3248 | 1,3,4,5,8,3<br>5,37,38  | 2,6,7,33,3<br>4,36,39,40 | 7  | P01039,P07379,P19218,Q6DGG1,Q6IFW6,Q6IG02,Q6P6Q2                                    |
| 3249 | 1,3,4,5,8,3<br>5,37,39  | 2,6,7,33,3<br>4,36,38,40 | 7  | P01039,P50116,P63029,P80299,P97829,Q6IG02,Q9R168                                    |
| 3250 | 1,3,4,5,8,3<br>5,37,40  | 2,6,7,33,3<br>4,36,38,39 | 3  | P80299,P82471,Q6IG02                                                                |
| 3251 | 1,3,4,5,8,3<br>5,38,39  | 2,6,7,33,3<br>4,36,37,40 | 2  | P36376,Q6P6Q2                                                                       |
| 3252 | 1,3,4,5,8,3<br>5,38,40  | 2,6,7,33,3<br>4,36,37,39 | 1  | Q6P6Q2                                                                              |
| 3253 | 1,3,4,5,8,3<br>5,39,40  | 2,6,7,33,3<br>4,36,37,38 | 5  | P36376,P54921,P80299,Q00715,Q9R168                                                  |
| 3254 | 1,3,4,5,8,3<br>6,37,38  | 2,6,7,33,3<br>4,35,39,40 | 6  | P01039,P19218,P97840,Q6IFW6,Q6IG02,Q6P6Q2                                           |
| 3255 | 1,3,4,5,8,3<br>6,37,39  | 2,6,7,33,3<br>4,35,38,40 | 6  | D3ZUC6,P01039,P63029,P80299,P97829,Q9R168                                           |
| 3256 | 1,3,4,5,8,3<br>6,37,40  | 2,6,7,33,3<br>4,35,38,39 | 4  | D3ZUC6,P80299,P82471,P97829                                                         |
| 3257 | 1,3,4,5,8,3<br>6,38,39  | 2,6,7,33,3<br>4,35,37,40 | 1  | Q9R168                                                                              |
| 3258 | 1,3,4,5,8,3<br>6,38,40  | 2,6,7,33,3<br>4,35,37,39 | 1  | Q6P6Q2                                                                              |
| 3259 | 1,3,4,5,8,3<br>6,39,40  | 2,6,7,33,3<br>4,35,37,38 | 5  | D3ZUC6,P01681,P54921,P97829,Q9R168                                                  |
| 3260 | 1,3,4,5,8,3<br>7,38,39  | 2,6,7,33,3<br>4,35,36,40 | 7  | D3ZUC6,Q4FZU2,Q6IFW6,Q6IG02,Q6P6Q2,Q9EQS0,Q9R168                                    |
| 3261 | 1,3,4,5,8,3<br>7,38,40  | 2,6,7,33,3<br>4,35,36,39 | 7  | D3ZUC6,P49134,Q4FZU2,Q6IFW6,Q6IG02,Q6IMF3,Q6P6Q2                                    |
| 3262 | 1,3,4,5,8,3<br>7,39,40  | 2,6,7,33,3<br>4,35,36,38 | 8  | D3ZUC6,P49134,P80299,P82471,P97829,Q6IFW6,Q6IG02,Q9R168                             |
| 3263 | 1,3,4,5,8,3<br>8,39,40  | 2,6,7,33,3<br>4,35,36,37 | 7  | D3ZUC6,O89117,P36376,P54921,Q6IFW6,Q6P6Q2,Q9R168                                    |
| 3264 | 1,3,4,5,33,<br>34,35,36 | 2,6,7,8,37,<br>38,39,40  | 12 | D4A5U3,P01681,P01835,P08721,P12020,P51740,P55091,P97840,Q5GRG2,Q5I0D7,Q5QE79,Q62635 |
| 3265 | 1,3,4,5,33,<br>34,35,37 | 2,6,7,8,36,<br>38,39,40  | 6  | P12020,P50115,P51740,P55091,Q62635,Q8CIZ5                                           |

|      |                                              |                                                                                        |
|------|----------------------------------------------|----------------------------------------------------------------------------------------|
| 3266 | 1,3,4,5,33, 2,6,7,8,36,<br>34,35,38 37,39,40 | 6 P01946,P02091,P12020,P19629,Q5GRG2,Q812E4                                            |
| 3267 | 1,3,4,5,33, 2,6,7,8,36,<br>34,35,39 37,38,40 | 4 P06911,P12020,P62804,Q5GRG2                                                          |
| 3268 | 1,3,4,5,33, 2,6,7,8,36,<br>34,35,40 37,38,39 | 2 P01681,P12020                                                                        |
| 3269 | 1,3,4,5,33, 2,6,7,8,35,<br>34,36,37 38,39,40 | 12 P00774,P11883,P47967,P51740,P55091,P97584,P97840,P98089,Q5EGZ1,Q5QE79,Q62635,Q8CIZ5 |
| 3270 | 1,3,4,5,33, 2,6,7,8,35,<br>34,36,38 37,39,40 | 3 P01681,P01946,P02091                                                                 |
| 3271 | 1,3,4,5,33, 2,6,7,8,35,<br>34,36,39 37,38,40 | 3 P01681,Q62635,Q99041                                                                 |
| 3272 | 1,3,4,5,33, 2,6,7,8,35,<br>34,36,40 37,38,39 | 1 P01681                                                                               |
| 3273 | 1,3,4,5,33, 2,6,7,8,35,<br>34,37,38 36,39,40 | 4 P01946,P02091,Q4FZU2,Q6IG02                                                          |
| 3274 | 1,3,4,5,33, 2,6,7,8,35,<br>34,37,39 36,38,40 | 2 Q62635,Q6AYQ8                                                                        |
| 3275 | 1,3,4,5,33, 2,6,7,8,35,<br>34,37,40 36,38,39 | 0                                                                                      |
| 3276 | 1,3,4,5,33, 2,6,7,8,35,<br>34,38,39 36,37,40 | 3 P01946,P02091,P19132                                                                 |
| 3277 | 1,3,4,5,33, 2,6,7,8,35,<br>34,38,40 36,37,39 | 2 P01946,P02091                                                                        |
| 3278 | 1,3,4,5,33, 2,6,7,8,35,<br>34,39,40 36,37,38 | 0                                                                                      |
| 3279 | 1,3,4,5,33, 2,6,7,8,34,<br>35,36,37 38,39,40 | 11 D4A5U3,F1M3L7,P01681,P20766,P47967,P51740,P55091,P62804,P97840,Q62635,Q8CIZ5        |
| 3280 | 1,3,4,5,33, 2,6,7,8,34,<br>35,36,38 37,39,40 | 5 P01681,P12020,P21674,P62804,P97840                                                   |
| 3281 | 1,3,4,5,33, 2,6,7,8,34,<br>35,36,39 37,38,40 | 5 P01681,P01835,P12020,P23739,P62804                                                   |
| 3282 | 1,3,4,5,33, 2,6,7,8,34,<br>35,36,40 37,38,39 | 3 P01681,P25809,P62804                                                                 |
| 3283 | 1,3,4,5,33, 2,6,7,8,34,<br>35,37,38 36,39,40 | 1 P20766                                                                               |
| 3284 | 1,3,4,5,33, 2,6,7,8,34,<br>35,37,39 36,38,40 | 2 P12020,P62804                                                                        |
| 3285 | 1,3,4,5,33, 2,6,7,8,34,<br>35,37,40 36,38,39 | 3 P01681,P50115,P62804                                                                 |



|      |                                              |                                                                  |
|------|----------------------------------------------|------------------------------------------------------------------|
| 3286 | 1,3,4,5,33, 2,6,7,8,34,<br>35,38,39 36,37,40 | 3 P12020,P62804,Q00715                                           |
| 3287 | 1,3,4,5,33, 2,6,7,8,34,<br>35,38,40 36,37,39 | 5 P01681,P12020,P62804,Q00715,Q6P6R2                             |
| 3288 | 1,3,4,5,33, 2,6,7,8,34,<br>35,39,40 36,37,38 | 4 P01681,P12020,P62804,Q00715                                    |
| 3289 | 1,3,4,5,33, 2,6,7,8,34,<br>36,37,38 35,39,40 | 2 P20766,P97840                                                  |
| 3290 | 1,3,4,5,33, 2,6,7,8,34,<br>36,37,39 35,38,40 | 4 P01681,P25809,P98089,Q62635                                    |
| 3291 | 1,3,4,5,33, 2,6,7,8,34,<br>36,37,40 35,38,39 | 4 P01681,P25809,P97840,Q9Z0V6                                    |
| 3292 | 1,3,4,5,33, 2,6,7,8,34,<br>36,38,39 35,37,40 | 2 P01681,P62804                                                  |
| 3293 | 1,3,4,5,33, 2,6,7,8,34,<br>36,38,40 35,37,39 | 3 P01681,P25809,Q9Z0V6                                           |
| 3294 | 1,3,4,5,33, 2,6,7,8,34,<br>36,39,40 35,37,38 | 3 P01681,P25809,P62804                                           |
| 3295 | 1,3,4,5,33, 2,6,7,8,34,<br>37,38,39 35,36,40 | 0                                                                |
| 3296 | 1,3,4,5,33, 2,6,7,8,34,<br>37,38,40 35,36,39 | 3 P20766,P25809,Q9Z1F2                                           |
| 3297 | 1,3,4,5,33, 2,6,7,8,34,<br>37,39,40 35,36,38 | 1 P25809                                                         |
| 3298 | 1,3,4,5,33, 2,6,7,8,34,<br>38,39,40 35,36,37 | 4 P01681,P25809,P62804,Q00715                                    |
| 3299 | 1,3,4,5,34, 2,6,7,8,33,<br>35,36,37 38,39,40 | 9 P01039,P25031,P47967,P50115,P50116,P51740,P55091,P97840,Q62635 |
| 3300 | 1,3,4,5,34, 2,6,7,8,33,<br>35,36,38 37,39,40 | 5 P01946,P02091,P21674,P97840,Q9QWN8                             |
| 3301 | 1,3,4,5,34, 2,6,7,8,33,<br>35,36,39 37,38,40 | 6 P01039,P02631,P12020,P23739,Q62714,Q68G31                      |
| 3302 | 1,3,4,5,34, 2,6,7,8,33,<br>35,36,40 37,38,39 | 2 P50115,Q68G31                                                  |
| 3303 | 1,3,4,5,34, 2,6,7,8,33,<br>35,37,38 36,39,40 | 3 P01946,P02091,Q6IG02                                           |
| 3304 | 1,3,4,5,34, 2,6,7,8,33,<br>35,37,39 36,38,40 | 4 P01039,P12020,P50115,P50116                                    |
| 3305 | 1,3,4,5,34, 2,6,7,8,33,<br>35,37,40 36,38,39 | 1 P50115                                                         |

|      |                                              |                                                    |
|------|----------------------------------------------|----------------------------------------------------|
| 3306 | 1,3,4,5,34, 2,6,7,8,33,<br>35,38,39 36,37,40 | 4 P01946,P02091,P08723,P12020                      |
| 3307 | 1,3,4,5,34, 2,6,7,8,33,<br>35,38,40 36,37,39 | 2 P01946,P02091                                    |
| 3308 | 1,3,4,5,34, 2,6,7,8,33,<br>35,39,40 36,37,38 | 2 P12020,P50115                                    |
| 3309 | 1,3,4,5,34, 2,6,7,8,33,<br>36,37,38 35,39,40 | 6 P01946,P02091,P29315,P97840,Q4KLZ6,Q6IG02        |
| 3310 | 1,3,4,5,34, 2,6,7,8,33,<br>36,37,39 35,38,40 | 2 P01039,Q62635                                    |
| 3311 | 1,3,4,5,34, 2,6,7,8,33,<br>36,37,40 35,38,39 | 3 P50115,Q4KLZ6,Q68G31                             |
| 3312 | 1,3,4,5,34, 2,6,7,8,33,<br>36,38,39 35,37,40 | 2 P01946,P02091                                    |
| 3313 | 1,3,4,5,34, 2,6,7,8,33,<br>36,38,40 35,37,39 | 3 P01946,P02091,Q4KLZ6                             |
| 3314 | 1,3,4,5,34, 2,6,7,8,33,<br>36,39,40 35,37,38 | 1 Q68G31                                           |
| 3315 | 1,3,4,5,34, 2,6,7,8,33,<br>37,38,39 35,36,40 | 4 P01946,P02091,Q6IFW6,Q6IG02                      |
| 3316 | 1,3,4,5,34, 2,6,7,8,33,<br>37,38,40 35,36,39 | 7 P01946,P02091,P49134,Q4FZU2,Q4KLZ6,Q6IFW6,Q6IG02 |
| 3317 | 1,3,4,5,34, 2,6,7,8,33,<br>37,39,40 35,36,38 | 2 P49134,P50115                                    |
| 3318 | 1,3,4,5,34, 2,6,7,8,33,<br>38,39,40 35,36,37 | 3 P01946,P02091,P08723                             |
| 3319 | 1,3,4,5,35, 2,6,7,8,33,<br>36,37,38 34,39,40 | 4 P01039,P02631,P19218,P97840                      |
| 3320 | 1,3,4,5,35, 2,6,7,8,33,<br>36,37,39 34,38,40 | 6 P01039,P02631,P23739,P50115,P50116,P97840        |
| 3321 | 1,3,4,5,35, 2,6,7,8,33,<br>36,37,40 34,38,39 | 5 P02793;Q7TP54,P19132,P50115,P50116,P97840        |
| 3322 | 1,3,4,5,35, 2,6,7,8,33,<br>36,38,39 34,37,40 | 5 P02631,P23739,P24368,P62804,Q9QW07               |
| 3323 | 1,3,4,5,35, 2,6,7,8,33,<br>36,38,40 34,37,39 | 2 P02631,Q9QWN8                                    |
| 3324 | 1,3,4,5,35, 2,6,7,8,33,<br>36,39,40 34,37,38 | 3 P02631,P23739,P62804                             |
| 3325 | 1,3,4,5,35, 2,6,7,8,33,<br>37,38,39 34,36,40 | 3 P02631,P08649,Q6IG02                             |

|      |                                                  |    |                                                                                                          |
|------|--------------------------------------------------|----|----------------------------------------------------------------------------------------------------------|
| 3326 | 1,3,4,5,35, 2,6,7,8,33,<br>37,38,40 34,36,39     | 3  | P08649,Q99MH3,Q9QX74                                                                                     |
| 3327 | 1,3,4,5,35, 2,6,7,8,33,<br>37,39,40 34,36,38     | 4  | P08649,P50115,P50116,P80299                                                                              |
| 3328 | 1,3,4,5,35, 2,6,7,8,33,<br>38,39,40 34,36,37     | 7  | O89117,P08649,P08723,P10758,Q00715,Q6P6R2,Q9QX74                                                         |
| 3329 | 1,3,4,5,36, 2,6,7,8,33,<br>37,38,39 34,35,40     | 2  | O89117,P02631                                                                                            |
| 3330 | 1,3,4,5,36, 2,6,7,8,33,<br>37,38,40 34,35,39     | 4  | P25809,Q4KLZ6,Q9QX74,Q9Z0V6                                                                              |
| 3331 | 1,3,4,5,36, 2,6,7,8,33,<br>37,39,40 34,35,38     | 3  | O89117,P25809,P97829                                                                                     |
| 3332 | 1,3,4,5,36, 2,6,7,8,33,<br>38,39,40 34,35,37     | 3  | O89117,P25809,Q9QX74                                                                                     |
| 3333 | 1,3,4,5,37, 2,6,7,8,33,<br>38,39,40 34,35,36     | 6  | D3ZUC6,O89117,P08649,P25809,Q6IG02,Q9QX74                                                                |
| 3334 | 1,3,4,6,7,8 2,5,35,36,<br>,33,34 37,38,39,4<br>0 | 11 | O70417,P08721,P11598,P98089,Q05702,Q09030,Q4V885,Q62635,Q63475,Q91XN4,Q99PP0                             |
| 3335 | 1,3,4,6,7,8 2,5,34,36,<br>,33,35 37,38,39,4<br>0 | 4  | O70417,P48032,Q09030,Q63493                                                                              |
| 3336 | 1,3,4,6,7,8 2,5,34,35,<br>,33,36 37,38,39,4<br>0 | 15 | O54728,O70417,P01681,P08649,P08721,P09656,P11598,P55091,P98089,Q09030,Q62635,Q63493,Q63617,Q91XN4,Q99PP0 |
| 3337 | 1,3,4,6,7,8 2,5,34,35,<br>,33,37 36,38,39,4<br>0 | 11 | P0C0A9,P11598,P22273,P22282,P48032,P98089,Q05702,Q62635,Q63493,Q63617,Q9QW07                             |
| 3338 | 1,3,4,6,7,8 2,5,34,35,<br>,33,38 36,37,39,4<br>0 | 3  | O70417,P35280,Q63493                                                                                     |
| 3339 | 1,3,4,6,7,8 2,5,34,35,<br>,33,39 36,37,38,4<br>0 | 4  | D3ZTE0,P23593,Q5RKI1,Q6AYQ8                                                                              |
| 3340 | 1,3,4,6,7,8 2,5,34,35,<br>,33,40 36,37,38,3<br>9 | 2  | O70417,P01681                                                                                            |
| 3341 | 1,3,4,6,7,8 2,5,33,36,<br>,34,35 37,38,39,4<br>0 | 6  | O70417,P01039,P36860,Q30KJ2,Q99041,Q9Z1F2                                                                |

|      |                       |                               |    |                                                                                                                                             |
|------|-----------------------|-------------------------------|----|---------------------------------------------------------------------------------------------------------------------------------------------|
| 3342 | 1,3,4,6,7,8<br>,34,36 | 2,5,33,35,<br>37,38,39,4<br>0 | 10 | O70417,P01039,P08649,P11598,P55091,P98089,Q62635,Q63617,Q68G31,Q9Z1F2                                                                       |
| 3343 | 1,3,4,6,7,8<br>,34,37 | 2,5,33,35,<br>36,38,39,4<br>0 | 14 | P01039,P06761,P0C0A9,P11598,P22273,P22282,P49134,P55091,P98089,Q05702,Q62635,Q63617,Q99041,Q9QW07                                           |
| 3344 | 1,3,4,6,7,8<br>,34,38 | 2,5,33,35,<br>36,37,39,4<br>0 | 8  | O70417,P01946,P02091,P02625,P35280,P49134,P97580,Q30KJ2                                                                                     |
| 3345 | 1,3,4,6,7,8<br>,34,39 | 2,5,33,35,<br>36,37,38,4<br>0 | 7  | P02651,P49134,P63029,Q68G31,Q9QX79,Q9Z0V6,Q9Z1F2                                                                                            |
| 3346 | 1,3,4,6,7,8<br>,34,40 | 2,5,33,35,<br>36,37,38,3<br>9 | 6  | P15399,P49134,P97580,Q30KJ2,Q68G31,Q99041                                                                                                   |
| 3347 | 1,3,4,6,7,8<br>,35,36 | 2,5,33,34,<br>37,38,39,4<br>0 | 11 | O70417,P01039,P09656,P19132,P19218,P55091,P97829,P97840,Q63617,Q99041,Q9Z1F2                                                                |
| 3348 | 1,3,4,6,7,8<br>,35,37 | 2,5,33,34,<br>36,38,39,4<br>0 | 12 | P01039,P0C0A9,P11598,P19132,P19218,P22273,P22282,P36860,P48032,P97829,Q63617,Q99041                                                         |
| 3349 | 1,3,4,6,7,8<br>,35,38 | 2,5,33,34,<br>36,37,39,4<br>0 | 4  | O70417,P19218,P35280,Q99041                                                                                                                 |
| 3350 | 1,3,4,6,7,8<br>,35,39 | 2,5,33,34,<br>36,37,38,4<br>0 | 3  | P23593,P36860,Q9Z1F2                                                                                                                        |
| 3351 | 1,3,4,6,7,8<br>,35,40 | 2,5,33,34,<br>36,37,38,3<br>9 | 4  | O70417,P02793,Q7TP54,P19132,Q99041                                                                                                          |
| 3352 | 1,3,4,6,7,8<br>,36,37 | 2,5,33,34,<br>35,38,39,4<br>0 | 20 | P01039,P06761,P06911,P09656,P0C0A9,P11598,P19132,P19218,P22273,P22282,P55091,P97829,P97840,P98089,Q5M8C6,Q62635,Q63617,Q8CJD3,Q99041,Q9JI85 |
| 3353 | 1,3,4,6,7,8<br>,36,38 | 2,5,33,34,<br>35,37,39,4<br>0 | 5  | O70417,P09656,P19218,P35280,Q63617                                                                                                          |
| 3354 | 1,3,4,6,7,8<br>,36,39 | 2,5,33,34,<br>35,37,38,4<br>0 | 4  | P63029,P97829,Q63617,Q9Z1F2                                                                                                                 |

|      |                        |                               |    |                                                                                            |
|------|------------------------|-------------------------------|----|--------------------------------------------------------------------------------------------|
| 3355 | 1,3,4,6,7,8<br>,36,40  | 2,5,33,34,<br>35,37,38,3<br>9 | 5  | O70417,P25809,P97829,Q63617,Q99041                                                         |
| 3356 | 1,3,4,6,7,8<br>,37,38  | 2,5,33,34,<br>35,36,39,4<br>0 | 9  | O70417,P11598,P19218,P22273,P35280,P49134,Q63617,Q99041,Q9EQS0                             |
| 3357 | 1,3,4,6,7,8<br>,37,39  | 2,5,33,34,<br>35,36,38,4<br>0 | 13 | D3ZUC6,P01039,P0C0A9,P11598,P22273,P22282,P23593,P49134,P63029,P97829,Q5M8C6,Q63617,Q99041 |
| 3358 | 1,3,4,6,7,8<br>,37,40  | 2,5,33,34,<br>35,36,38,3<br>9 | 11 | D3ZUC6,P06911,P0C0A9,P11598,P19132,P22273,P49134,P97829,Q63617,Q99041,Q9QW07               |
| 3359 | 1,3,4,6,7,8<br>,38,39  | 2,5,33,34,<br>35,36,37,4<br>0 | 4  | O70417,P35280,Q5QE79,Q9EQS0                                                                |
| 3360 | 1,3,4,6,7,8<br>,38,40  | 2,5,33,34,<br>35,36,37,3<br>9 | 3  | O70417,P35280,Q99041                                                                       |
| 3361 | 1,3,4,6,7,8<br>,39,40  | 2,5,33,34,<br>35,36,37,3<br>8 | 5  | D3ZUC6,P22273,P23593,P54921,Q9R168                                                         |
| 3362 | 1,3,4,6,7,3<br>3,34,35 | 2,5,8,36,3<br>7,38,39,40      | 3  | P08721,Q5I0D7,Q8K1G0                                                                       |
| 3363 | 1,3,4,6,7,3<br>3,34,36 | 2,5,8,35,3<br>7,38,39,40      | 8  | P08494,P08721,P11598,P26772,P55091,P98089,Q5I0D7,Q62635                                    |
| 3364 | 1,3,4,6,7,3<br>3,34,37 | 2,5,8,35,3<br>6,38,39,40      | 7  | P08721,P0C0A9,P11598,P55091,P98089,Q62635,Q6AYQ8                                           |
| 3365 | 1,3,4,6,7,3<br>3,34,38 | 2,5,8,35,3<br>6,37,39,40      | 4  | P01946,P02091,P08721,P80299                                                                |
| 3366 | 1,3,4,6,7,3<br>3,34,39 | 2,5,8,35,3<br>6,37,38,40      | 4  | P02651,Q5RKI1,Q6AYQ8,Q9QX79                                                                |
| 3367 | 1,3,4,6,7,3<br>3,34,40 | 2,5,8,35,3<br>6,37,38,39      | 0  |                                                                                            |
| 3368 | 1,3,4,6,7,3<br>3,35,36 | 2,5,8,34,3<br>7,38,39,40      | 4  | P08721,P09656,P97840,Q920G2                                                                |
| 3369 | 1,3,4,6,7,3<br>3,35,37 | 2,5,8,34,3<br>6,38,39,40      | 3  | P19132,Q63617,Q8CIZ5                                                                       |
| 3370 | 1,3,4,6,7,3<br>3,35,38 | 2,5,8,34,3<br>6,37,39,40      | 1  | O70417                                                                                     |
| 3371 | 1,3,4,6,7,3<br>3,35,39 | 2,5,8,34,3<br>6,37,38,40      | 2  | P62804,Q5RKI1                                                                              |

|      |                        |                          |    |                                                                                                       |
|------|------------------------|--------------------------|----|-------------------------------------------------------------------------------------------------------|
| 3372 | 1,3,4,6,7,3<br>3,35,40 | 2,5,8,34,3<br>6,37,38,39 | 1  | P25809                                                                                                |
| 3373 | 1,3,4,6,7,3<br>3,36,37 | 2,5,8,34,3<br>5,38,39,40 | 14 | P00774,P08721,P08723,P09656,P0C0A9,P11598,P11883,P25809,P55091,P97840,P98089,Q6263<br>5,Q63617,Q8CIZ5 |
| 3374 | 1,3,4,6,7,3<br>3,36,38 | 2,5,8,34,3<br>5,37,39,40 | 3  | P08721,P09656,P25809                                                                                  |
| 3375 | 1,3,4,6,7,3<br>3,36,39 | 2,5,8,34,3<br>5,37,38,40 | 3  | P09656,P25809,Q5RKI1                                                                                  |
| 3376 | 1,3,4,6,7,3<br>3,36,40 | 2,5,8,34,3<br>5,37,38,39 | 2  | P01681,P25809                                                                                         |
| 3377 | 1,3,4,6,7,3<br>3,37,38 | 2,5,8,34,3<br>5,36,39,40 | 1  | P11598                                                                                                |
| 3378 | 1,3,4,6,7,3<br>3,37,39 | 2,5,8,34,3<br>5,36,38,40 | 4  | P11598,P25809,Q5RKI1,Q6AYQ8                                                                           |
| 3379 | 1,3,4,6,7,3<br>3,37,40 | 2,5,8,34,3<br>5,36,38,39 | 3  | P11598,P25809,Q9QW07                                                                                  |
| 3380 | 1,3,4,6,7,3<br>3,38,39 | 2,5,8,34,3<br>5,36,37,40 | 2  | P02770,Q5RKI1                                                                                         |
| 3381 | 1,3,4,6,7,3<br>3,38,40 | 2,5,8,34,3<br>5,36,37,39 | 1  | P25809                                                                                                |
| 3382 | 1,3,4,6,7,3<br>3,39,40 | 2,5,8,34,3<br>5,36,37,38 | 3  | P25809,Q5RKI1,Q6AYQ8                                                                                  |
| 3383 | 1,3,4,6,7,3<br>4,35,36 | 2,5,8,33,3<br>7,38,39,40 | 8  | P01039,P19132,P55091,P97840,Q5I0D7,Q68G31,Q9QWN8,Q9Z1F2                                               |
| 3384 | 1,3,4,6,7,3<br>4,35,37 | 2,5,8,33,3<br>6,38,39,40 | 4  | P01039,P11598,P19132,P55091                                                                           |
| 3385 | 1,3,4,6,7,3<br>4,35,38 | 2,5,8,33,3<br>6,37,39,40 | 3  | P01946,P02091,Q9QWN8                                                                                  |
| 3386 | 1,3,4,6,7,3<br>4,35,39 | 2,5,8,33,3<br>6,37,38,40 | 1  | Q9Z1F2                                                                                                |
| 3387 | 1,3,4,6,7,3<br>4,35,40 | 2,5,8,33,3<br>6,37,38,39 | 1  | P10758                                                                                                |
| 3388 | 1,3,4,6,7,3<br>4,36,37 | 2,5,8,33,3<br>5,38,39,40 | 10 | P01039,P09656,P11598,P19132,P47967,P55091,P97840,P98089,Q62635,Q63617                                 |
| 3389 | 1,3,4,6,7,3<br>4,36,38 | 2,5,8,33,3<br>5,37,39,40 | 3  | P01946,P02091,Q9QWN8                                                                                  |
| 3390 | 1,3,4,6,7,3<br>4,36,39 | 2,5,8,33,3<br>5,37,38,40 | 2  | Q68G31,Q9Z1F2                                                                                         |
| 3391 | 1,3,4,6,7,3<br>4,36,40 | 2,5,8,33,3<br>5,37,38,39 | 1  | Q68G31                                                                                                |

|      |                        |                          |    |                                                                       |
|------|------------------------|--------------------------|----|-----------------------------------------------------------------------|
| 3392 | 1,3,4,6,7,3<br>4,37,38 | 2,5,8,33,3<br>5,36,39,40 | 4  | P01946,P02091,P11598,P49134                                           |
| 3393 | 1,3,4,6,7,3<br>4,37,39 | 2,5,8,33,3<br>5,36,38,40 | 3  | P11598,P49134,P63029                                                  |
| 3394 | 1,3,4,6,7,3<br>4,37,40 | 2,5,8,33,3<br>5,36,38,39 | 4  | P11598,P19132,P49134,Q9QW07                                           |
| 3395 | 1,3,4,6,7,3<br>4,38,39 | 2,5,8,33,3<br>5,36,37,40 | 4  | F1M3L7,P01946,P02091,Q9QX79                                           |
| 3396 | 1,3,4,6,7,3<br>4,38,40 | 2,5,8,33,3<br>5,36,37,39 | 3  | P01946,P02091,P10758                                                  |
| 3397 | 1,3,4,6,7,3<br>4,39,40 | 2,5,8,33,3<br>5,36,37,38 | 3  | F1M3L7,P10758,Q68G31                                                  |
| 3398 | 1,3,4,6,7,3<br>5,36,37 | 2,5,8,33,3<br>4,38,39,40 | 10 | P01039,P09656,P11598,P19132,P47967,P55091,P97829,P97840,Q63617,Q8CIZ5 |
| 3399 | 1,3,4,6,7,3<br>5,36,38 | 2,5,8,33,3<br>4,37,39,40 | 4  | P09656,P19218,Q8VD89,Q9QWN8                                           |
| 3400 | 1,3,4,6,7,3<br>5,36,39 | 2,5,8,33,3<br>4,37,38,40 | 2  | P09656,Q9Z1F2                                                         |
| 3401 | 1,3,4,6,7,3<br>5,36,40 | 2,5,8,33,3<br>4,37,38,39 | 5  | P02793;Q7TP54,P06760,P19132,P25809,Q9QWN8                             |
| 3402 | 1,3,4,6,7,3<br>5,37,38 | 2,5,8,33,3<br>4,36,39,40 | 2  | P19218,Q99041                                                         |
| 3403 | 1,3,4,6,7,3<br>5,37,39 | 2,5,8,33,3<br>4,36,38,40 | 1  | P63029                                                                |
| 3404 | 1,3,4,6,7,3<br>5,37,40 | 2,5,8,33,3<br>4,36,38,39 | 4  | P02793;Q7TP54,P19132,Q99041,Q9QW07                                    |
| 3405 | 1,3,4,6,7,3<br>5,38,39 | 2,5,8,33,3<br>4,36,37,40 | 0  |                                                                       |
| 3406 | 1,3,4,6,7,3<br>5,38,40 | 2,5,8,33,3<br>4,36,37,39 | 3  | P02793;Q7TP54,P06760,P10758                                           |
| 3407 | 1,3,4,6,7,3<br>5,39,40 | 2,5,8,33,3<br>4,36,37,38 | 2  | P06760,P10758                                                         |
| 3408 | 1,3,4,6,7,3<br>6,37,38 | 2,5,8,33,3<br>4,35,39,40 | 5  | P09656,P11598,P25809,P97840,Q63617                                    |
| 3409 | 1,3,4,6,7,3<br>6,37,39 | 2,5,8,33,3<br>4,35,38,40 | 7  | P01039,P09656,P11598,P25809,P63029,P97829,Q63617                      |
| 3410 | 1,3,4,6,7,3<br>6,37,40 | 2,5,8,33,3<br>4,35,38,39 | 7  | P09656,P11598,P19132,P25809,P97829,Q63617,Q9QW07                      |
| 3411 | 1,3,4,6,7,3<br>6,38,39 | 2,5,8,33,3<br>4,35,37,40 | 2  | P09656,P25809                                                         |

|      |                        |                          |    |                                                                                                   |
|------|------------------------|--------------------------|----|---------------------------------------------------------------------------------------------------|
| 3412 | 1,3,4,6,7,3<br>6,38,40 | 2,5,8,33,3<br>4,35,37,39 | 2  | P25809,Q9QWN8                                                                                     |
| 3413 | 1,3,4,6,7,3<br>6,39,40 | 2,5,8,33,3<br>4,35,37,38 | 2  | P06760,P25809                                                                                     |
| 3414 | 1,3,4,6,7,3<br>7,38,39 | 2,5,8,33,3<br>4,35,36,40 | 1  | Q5QE79                                                                                            |
| 3415 | 1,3,4,6,7,3<br>7,38,40 | 2,5,8,33,3<br>4,35,36,39 | 4  | P23739,P25809,Q99041,Q9QX74                                                                       |
| 3416 | 1,3,4,6,7,3<br>7,39,40 | 2,5,8,33,3<br>4,35,36,38 | 1  | P25809                                                                                            |
| 3417 | 1,3,4,6,7,3<br>8,39,40 | 2,5,8,33,3<br>4,35,36,37 | 5  | P06760,P10758,P25809,P51740,Q5QE79                                                                |
| 3418 | 1,3,4,6,8,3<br>3,34,35 | 2,5,7,36,3<br>7,38,39,40 | 4  | O89117,P00762,Q30KJ2,Q63475                                                                       |
| 3419 | 1,3,4,6,8,3<br>3,34,36 | 2,5,7,35,3<br>7,38,39,40 | 14 | G3V686,O54728,P00762,P01681,P02625,P08494,P08649,P08721,P26772,P55091,P98089,Q05702,Q62635,Q63475 |
| 3420 | 1,3,4,6,8,3<br>3,34,37 | 2,5,7,35,3<br>6,38,39,40 | 4  | P55091,P98089,Q05702,Q62635                                                                       |
| 3421 | 1,3,4,6,8,3<br>3,34,38 | 2,5,7,35,3<br>6,37,39,40 | 9  | O70417,P00762,P01946,P02091,P02625,P97580,Q05702,Q30KJ2,Q63475                                    |
| 3422 | 1,3,4,6,8,3<br>3,34,39 | 2,5,7,35,3<br>6,37,38,40 | 3  | P02651,Q05702,Q63514                                                                              |
| 3423 | 1,3,4,6,8,3<br>3,34,40 | 2,5,7,35,3<br>6,37,38,39 | 6  | P01681,P15399,P97580,Q05702,Q30KJ2,Q63475                                                         |
| 3424 | 1,3,4,6,8,3<br>3,35,36 | 2,5,7,34,3<br>7,38,39,40 | 7  | O54728,P01681,P09656,P62804,Q09030,Q6AY61,Q920G2                                                  |
| 3425 | 1,3,4,6,8,3<br>3,35,37 | 2,5,7,34,3<br>6,38,39,40 | 0  |                                                                                                   |
| 3426 | 1,3,4,6,8,3<br>3,35,38 | 2,5,7,34,3<br>6,37,39,40 | 1  | O70417                                                                                            |
| 3427 | 1,3,4,6,8,3<br>3,35,39 | 2,5,7,34,3<br>6,37,38,40 | 1  | P62804                                                                                            |
| 3428 | 1,3,4,6,8,3<br>3,35,40 | 2,5,7,34,3<br>6,37,38,39 | 2  | P01681,P62804                                                                                     |
| 3429 | 1,3,4,6,8,3<br>3,36,37 | 2,5,7,34,3<br>5,38,39,40 | 8  | O54728,P01681,P08723,P09656,P55091,P98089,Q62635,Q9JI85                                           |
| 3430 | 1,3,4,6,8,3<br>3,36,38 | 2,5,7,34,3<br>5,37,39,40 | 4  | O54728,O70417,P01681,P09656                                                                       |
| 3431 | 1,3,4,6,8,3<br>3,36,39 | 2,5,7,34,3<br>5,37,38,40 | 5  | O54728,P01681,P08649,P09656,Q63514                                                                |



|      |                        |                          |                                                    |
|------|------------------------|--------------------------|----------------------------------------------------|
| 3432 | 1,3,4,6,8,3<br>3,36,40 | 2,5,7,34,3<br>5,37,38,39 | 3 O54728,P01681,P25809                             |
| 3433 | 1,3,4,6,8,3<br>3,37,38 | 2,5,7,34,3<br>5,36,39,40 | 0                                                  |
| 3434 | 1,3,4,6,8,3<br>3,37,39 | 2,5,7,34,3<br>5,36,38,40 | 0                                                  |
| 3435 | 1,3,4,6,8,3<br>3,37,40 | 2,5,7,34,3<br>5,36,38,39 | 1 Q9QW07                                           |
| 3436 | 1,3,4,6,8,3<br>3,38,39 | 2,5,7,34,3<br>5,36,37,40 | 1 O70417                                           |
| 3437 | 1,3,4,6,8,3<br>3,38,40 | 2,5,7,34,3<br>5,36,37,39 | 3 O70417,P01681,P25031                             |
| 3438 | 1,3,4,6,8,3<br>3,39,40 | 2,5,7,34,3<br>5,36,37,38 | 3 P01681,P54921,Q9R168                             |
| 3439 | 1,3,4,6,8,3<br>4,35,36 | 2,5,7,33,3<br>7,38,39,40 | 4 P01039,P08649,P55091,Q6AY61                      |
| 3440 | 1,3,4,6,8,3<br>4,35,37 | 2,5,7,33,3<br>6,38,39,40 | 4 P01039,P36860,P50116,P55091                      |
| 3441 | 1,3,4,6,8,3<br>4,35,38 | 2,5,7,33,3<br>6,37,39,40 | 5 O70417,P01946,P02091,P97580,Q30KJ2               |
| 3442 | 1,3,4,6,8,3<br>4,35,39 | 2,5,7,33,3<br>6,37,38,40 | 3 P36860,Q30KJ2,Q9Z1F2                             |
| 3443 | 1,3,4,6,8,3<br>4,35,40 | 2,5,7,33,3<br>6,37,38,39 | 3 P15399,P97580,Q30KJ2                             |
| 3444 | 1,3,4,6,8,3<br>4,36,37 | 2,5,7,33,3<br>5,38,39,40 | 7 P01039,P08649,P09656,P55091,P98089,Q62635,Q9JI85 |
| 3445 | 1,3,4,6,8,3<br>4,36,38 | 2,5,7,33,3<br>5,37,39,40 | 6 O70417,P01946,P02091,P02625,P08649,Q30KJ2        |
| 3446 | 1,3,4,6,8,3<br>4,36,39 | 2,5,7,33,3<br>5,37,38,40 | 2 P08649,Q9Z1F2                                    |
| 3447 | 1,3,4,6,8,3<br>4,36,40 | 2,5,7,33,3<br>5,37,38,39 | 4 P08649,P15399,P97580,Q30KJ2                      |
| 3448 | 1,3,4,6,8,3<br>4,37,38 | 2,5,7,33,3<br>5,36,39,40 | 6 P01946,P02091,P49134,Q30KJ2,Q6IFW6,Q6IG02        |
| 3449 | 1,3,4,6,8,3<br>4,37,39 | 2,5,7,33,3<br>5,36,38,40 | 2 P01039,P49134                                    |
| 3450 | 1,3,4,6,8,3<br>4,37,40 | 2,5,7,33,3<br>5,36,38,39 | 6 P13432,P15399,P49134,P97580,Q30KJ2,Q9QW07        |
| 3451 | 1,3,4,6,8,3<br>4,38,39 | 2,5,7,33,3<br>5,36,37,40 | 4 P01946,P02091,P97580,Q30KJ2                      |

|      |                        |                          |   |                                                                |
|------|------------------------|--------------------------|---|----------------------------------------------------------------|
| 3452 | 1,3,4,6,8,3<br>4,38,40 | 2,5,7,33,3<br>5,36,37,39 | 6 | O70417,P01946,P02091,P15399,P97580,Q30KJ2                      |
| 3453 | 1,3,4,6,8,3<br>4,39,40 | 2,5,7,33,3<br>5,36,37,38 | 5 | P15399,P54921,P97580,Q30KJ2,Q9R168                             |
| 3454 | 1,3,4,6,8,3<br>5,36,37 | 2,5,7,33,3<br>4,38,39,40 | 9 | P01039,P09656,P19132,P19218,P50116,P55091,P97829,Q6AY61,Q9JI85 |
| 3455 | 1,3,4,6,8,3<br>5,36,38 | 2,5,7,33,3<br>4,37,39,40 | 5 | O70417,P09656,P19218,Q6AY61,Q8VD89                             |
| 3456 | 1,3,4,6,8,3<br>5,36,39 | 2,5,7,33,3<br>4,37,38,40 | 8 | P01039,P09656,P50116,P54921,P97829,Q62714,Q6AY61,Q9R168        |
| 3457 | 1,3,4,6,8,3<br>5,36,40 | 2,5,7,33,3<br>4,37,38,39 | 4 | P02793,Q7TP54,P19132,P54921,Q6AY61                             |
| 3458 | 1,3,4,6,8,3<br>5,37,38 | 2,5,7,33,3<br>4,36,39,40 | 2 | O70417,P19218                                                  |
| 3459 | 1,3,4,6,8,3<br>5,37,39 | 2,5,7,33,3<br>4,36,38,40 | 3 | P01039,P50116,P97829                                           |
| 3460 | 1,3,4,6,8,3<br>5,37,40 | 2,5,7,33,3<br>4,36,38,39 | 5 | P19132,P50116,P82471,Q99041,Q9QW07                             |
| 3461 | 1,3,4,6,8,3<br>5,38,39 | 2,5,7,33,3<br>4,36,37,40 | 2 | O70417,P54921                                                  |
| 3462 | 1,3,4,6,8,3<br>5,38,40 | 2,5,7,33,3<br>4,36,37,39 | 2 | O70417,P54921                                                  |
| 3463 | 1,3,4,6,8,3<br>5,39,40 | 2,5,7,33,3<br>4,36,37,38 | 2 | P54921,Q9R168                                                  |
| 3464 | 1,3,4,6,8,3<br>6,37,38 | 2,5,7,33,3<br>4,35,39,40 | 3 | P06911,P09656,P19218                                           |
| 3465 | 1,3,4,6,8,3<br>6,37,39 | 2,5,7,33,3<br>4,35,38,40 | 5 | P01039,P09656,P50116,P97829,Q9R168                             |
| 3466 | 1,3,4,6,8,3<br>6,37,40 | 2,5,7,33,3<br>4,35,38,39 | 7 | P06911,P09656,P19132,P82471,P97829,Q9JI85,Q9QW07               |
| 3467 | 1,3,4,6,8,3<br>6,38,39 | 2,5,7,33,3<br>4,35,37,40 | 2 | P09656,Q9R168                                                  |
| 3468 | 1,3,4,6,8,3<br>6,38,40 | 2,5,7,33,3<br>4,35,37,39 | 1 | O70417                                                         |
| 3469 | 1,3,4,6,8,3<br>6,39,40 | 2,5,7,33,3<br>4,35,37,38 | 3 | P54921,P97829,Q9R168                                           |
| 3470 | 1,3,4,6,8,3<br>7,38,39 | 2,5,7,33,3<br>4,35,36,40 | 2 | Q6IG02,Q9EQS0                                                  |
| 3471 | 1,3,4,6,8,3<br>7,38,40 | 2,5,7,33,3<br>4,35,36,39 | 2 | P49134,Q9QW07                                                  |

|      |                         |                          |    |                                                                              |
|------|-------------------------|--------------------------|----|------------------------------------------------------------------------------|
| 3472 | 1,3,4,6,8,3<br>7,39,40  | 2,5,7,33,3<br>4,35,36,38 | 5  | P49134,P82471,P97829,Q9QW07,Q9R168                                           |
| 3473 | 1,3,4,6,8,3<br>8,39,40  | 2,5,7,33,3<br>4,35,36,37 | 3  | P51740,P54921,Q9R168                                                         |
| 3474 | 1,3,4,6,33,<br>34,35,36 | 2,5,7,8,37,<br>38,39,40  | 8  | D3ZUC6,P08494,P08721,P11883,Q5I0D7,Q62635,Q6PCU2,Q920G2                      |
| 3475 | 1,3,4,6,33,<br>34,35,37 | 2,5,7,8,36,<br>38,39,40  | 2  | P80020,Q62635                                                                |
| 3476 | 1,3,4,6,33,<br>34,35,38 | 2,5,7,8,36,<br>37,39,40  | 2  | P01946,P02091                                                                |
| 3477 | 1,3,4,6,33,<br>34,35,39 | 2,5,7,8,36,<br>37,38,40  | 1  | P62804                                                                       |
| 3478 | 1,3,4,6,33,<br>34,35,40 | 2,5,7,8,36,<br>37,38,39  | 1  | Q06000                                                                       |
| 3479 | 1,3,4,6,33,<br>34,36,37 | 2,5,7,8,35,<br>38,39,40  | 6  | P00774,P09656,P11883,P55091,P98089,Q62635                                    |
| 3480 | 1,3,4,6,33,<br>34,36,38 | 2,5,7,8,35,<br>37,39,40  | 3  | P01946,P02091,P08721                                                         |
| 3481 | 1,3,4,6,33,<br>34,36,39 | 2,5,7,8,35,<br>37,38,40  | 2  | P08494,P08649                                                                |
| 3482 | 1,3,4,6,33,<br>34,36,40 | 2,5,7,8,35,<br>37,38,39  | 3  | P01681,P08494,P11883                                                         |
| 3483 | 1,3,4,6,33,<br>34,37,38 | 2,5,7,8,35,<br>36,39,40  | 2  | P01946,P02091                                                                |
| 3484 | 1,3,4,6,33,<br>34,37,39 | 2,5,7,8,35,<br>36,38,40  | 0  |                                                                              |
| 3485 | 1,3,4,6,33,<br>34,37,40 | 2,5,7,8,35,<br>36,38,39  | 1  | Q9QW07                                                                       |
| 3486 | 1,3,4,6,33,<br>34,38,39 | 2,5,7,8,35,<br>36,37,40  | 2  | P01946,P02091                                                                |
| 3487 | 1,3,4,6,33,<br>34,38,40 | 2,5,7,8,35,<br>36,37,39  | 3  | P01946,P02091,Q06000                                                         |
| 3488 | 1,3,4,6,33,<br>34,39,40 | 2,5,7,8,35,<br>36,37,38  | 0  |                                                                              |
| 3489 | 1,3,4,6,33,<br>35,36,37 | 2,5,7,8,34,<br>38,39,40  | 11 | D4A5U3,P09656,P11883,P19132,P55091,P62804,Q4FZU6,Q62635,Q8CIZ5,Q920G2,Q9Z0V6 |
| 3490 | 1,3,4,6,33,<br>35,36,38 | 2,5,7,8,34,<br>37,39,40  | 6  | P06760,P09656,P62804,Q8VD89,Q920G2,Q9Z0V6                                    |
| 3491 | 1,3,4,6,33,<br>35,36,39 | 2,5,7,8,34,<br>37,38,40  | 4  | P01681,P06760,P09656,P62804                                                  |

|      |                                              |                                                                  |
|------|----------------------------------------------|------------------------------------------------------------------|
| 3492 | 1,3,4,6,33, 2,5,7,8,34,<br>35,36,40 37,38,39 | 8 P01681,P06760,P09656,P25809,P62804,Q920G2,Q9WTT6,Q9Z0V6        |
| 3493 | 1,3,4,6,33, 2,5,7,8,34,<br>35,37,38 36,39,40 | 0                                                                |
| 3494 | 1,3,4,6,33, 2,5,7,8,34,<br>35,37,39 36,38,40 | 1 P62804                                                         |
| 3495 | 1,3,4,6,33, 2,5,7,8,34,<br>35,37,40 36,38,39 | 3 P06760,P62804,Q9Z0V6                                           |
| 3496 | 1,3,4,6,33, 2,5,7,8,34,<br>35,38,39 36,37,40 | 2 P06760,P62804                                                  |
| 3497 | 1,3,4,6,33, 2,5,7,8,34,<br>35,38,40 36,37,39 | 3 P06760,P62804,Q9Z0V6                                           |
| 3498 | 1,3,4,6,33, 2,5,7,8,34,<br>35,39,40 36,37,38 | 3 P06760,P62804,Q00715                                           |
| 3499 | 1,3,4,6,33, 2,5,7,8,34,<br>36,37,38 35,39,40 | 3 P09656,P25809,Q9Z0V6                                           |
| 3500 | 1,3,4,6,33, 2,5,7,8,34,<br>36,37,39 35,38,40 | 2 P09656,P25809                                                  |
| 3501 | 1,3,4,6,33, 2,5,7,8,34,<br>36,37,40 35,38,39 | 7 P01681,P09656,P11883,P25809,P70549,Q9WTT6,Q9Z0V6               |
| 3502 | 1,3,4,6,33, 2,5,7,8,34,<br>36,38,39 35,37,40 | 4 P06760,P09656,P25809,P62804                                    |
| 3503 | 1,3,4,6,33, 2,5,7,8,34,<br>36,38,40 35,37,39 | 6 P01681,P06760,P09656,P25809,Q9WTT6,Q9Z0V6                      |
| 3504 | 1,3,4,6,33, 2,5,7,8,34,<br>36,39,40 35,37,38 | 4 P01681,P06760,P25809,P62804                                    |
| 3505 | 1,3,4,6,33, 2,5,7,8,34,<br>37,38,39 35,36,40 | 0                                                                |
| 3506 | 1,3,4,6,33, 2,5,7,8,34,<br>37,38,40 35,36,39 | 4 P06760,P25809,Q9Z0V6,Q9Z1F2                                    |
| 3507 | 1,3,4,6,33, 2,5,7,8,34,<br>37,39,40 35,36,38 | 2 P06760,P25809                                                  |
| 3508 | 1,3,4,6,33, 2,5,7,8,34,<br>38,39,40 35,36,37 | 4 P06760,P25809,P51740,P62804                                    |
| 3509 | 1,3,4,6,34, 2,5,7,8,33,<br>35,36,37 38,39,40 | 9 P01039,P09656,P11883,P19132,P39069,P50115,P50116,P55091,Q62635 |
| 3510 | 1,3,4,6,34, 2,5,7,8,33,<br>35,36,38 37,39,40 | 3 P01946,P02091,Q9QWN8                                           |
| 3511 | 1,3,4,6,34, 2,5,7,8,33,<br>35,36,39 37,38,40 | 1 Q62714                                                         |

|      |                                              |                                                                         |
|------|----------------------------------------------|-------------------------------------------------------------------------|
| 3512 | 1,3,4,6,34, 2,5,7,8,33,<br>35,36,40 37,38,39 | 0                                                                       |
| 3513 | 1,3,4,6,34, 2,5,7,8,33,<br>35,37,38 36,39,40 | 2 P01946,P02091                                                         |
| 3514 | 1,3,4,6,34, 2,5,7,8,33,<br>35,37,39 36,38,40 | 1 P50116                                                                |
| 3515 | 1,3,4,6,34, 2,5,7,8,33,<br>35,37,40 36,38,39 | 2 P19132,P50115                                                         |
| 3516 | 1,3,4,6,34, 2,5,7,8,33,<br>35,38,39 36,37,40 | 2 P01946,P02091                                                         |
| 3517 | 1,3,4,6,34, 2,5,7,8,33,<br>35,38,40 36,37,39 | 3 P01946,P02091,P06760                                                  |
| 3518 | 1,3,4,6,34, 2,5,7,8,33,<br>35,39,40 36,37,38 | 2 P06760,P10758                                                         |
| 3519 | 1,3,4,6,34, 2,5,7,8,33,<br>36,37,38 35,39,40 | 5 P01946,P02091,P09656,P29315,Q4KLZ6                                    |
| 3520 | 1,3,4,6,34, 2,5,7,8,33,<br>36,37,39 35,38,40 | 2 P01039,P09656                                                         |
| 3521 | 1,3,4,6,34, 2,5,7,8,33,<br>36,37,40 35,38,39 | 4 P09656,P11883,P19132,Q4KLZ6                                           |
| 3522 | 1,3,4,6,34, 2,5,7,8,33,<br>36,38,39 35,37,40 | 2 P01946,P02091                                                         |
| 3523 | 1,3,4,6,34, 2,5,7,8,33,<br>36,38,40 35,37,39 | 3 P01946,P02091,Q4KLZ6                                                  |
| 3524 | 1,3,4,6,34, 2,5,7,8,33,<br>36,39,40 35,37,38 | 0                                                                       |
| 3525 | 1,3,4,6,34, 2,5,7,8,33,<br>37,38,39 35,36,40 | 2 P01946,P02091                                                         |
| 3526 | 1,3,4,6,34, 2,5,7,8,33,<br>37,38,40 35,36,39 | 4 P01946,P02091,P49134,Q4KLZ6                                           |
| 3527 | 1,3,4,6,34, 2,5,7,8,33,<br>37,39,40 35,36,38 | 1 P49134                                                                |
| 3528 | 1,3,4,6,34, 2,5,7,8,33,<br>38,39,40 35,36,37 | 7 P01946,P02091,P06760,P10758,P15399,P51740,P97580                      |
| 3529 | 1,3,4,6,35, 2,5,7,8,33,<br>36,37,38 34,39,40 | 4 P09656,P19218,Q8VD89,Q9Z0V6                                           |
| 3530 | 1,3,4,6,35, 2,5,7,8,33,<br>36,37,39 34,38,40 | 5 P01039,P09656,P50116,P70549,P97829                                    |
| 3531 | 1,3,4,6,35, 2,5,7,8,33,<br>36,37,40 34,38,39 | 9 P02793;Q7TP54,P06760,P09656,P19132,P25809,P50115,P50116,P70549,Q9Z0V6 |

|      |                                              |                                                                                                          |
|------|----------------------------------------------|----------------------------------------------------------------------------------------------------------|
| 3532 | 1,3,4,6,35, 2,5,7,8,33,<br>36,38,39 34,37,40 | 3 P06760,P09656,P62804                                                                                   |
| 3533 | 1,3,4,6,35, 2,5,7,8,33,<br>36,38,40 34,37,39 | 5 P02793;Q7TP54,P06760,P09656,Q9QX74,Q9Z0V6                                                              |
| 3534 | 1,3,4,6,35, 2,5,7,8,33,<br>36,39,40 34,37,38 | 4 P06760,P25809,P54921,P62804                                                                            |
| 3535 | 1,3,4,6,35, 2,5,7,8,33,<br>37,38,39 34,36,40 | 2 P06760,Q9QX74                                                                                          |
| 3536 | 1,3,4,6,35, 2,5,7,8,33,<br>37,38,40 34,36,39 | 3 P06760,Q9QX74,Q9Z0V6                                                                                   |
| 3537 | 1,3,4,6,35, 2,5,7,8,33,<br>37,39,40 34,36,38 | 4 P06760,P50115,P50116,Q9QX74                                                                            |
| 3538 | 1,3,4,6,35, 2,5,7,8,33,<br>38,39,40 34,36,37 | 7 P06760,P10758,P51740,P54921,Q00715,Q63751,Q9QX74                                                       |
| 3539 | 1,3,4,6,36, 2,5,7,8,33,<br>37,38,39 34,35,40 | 2 P09656,Q9QX74                                                                                          |
| 3540 | 1,3,4,6,36, 2,5,7,8,33,<br>37,38,40 34,35,39 | 6 P06760,P09656,P25809,Q4KLZ6,Q9QX74,Q9Z0V6                                                              |
| 3541 | 1,3,4,6,36, 2,5,7,8,33,<br>37,39,40 34,35,38 | 7 P06760,P09656,P19629,P25809,P70549,P97829,Q9QX74                                                       |
| 3542 | 1,3,4,6,36, 2,5,7,8,33,<br>38,39,40 34,35,37 | 5 P06760,P25809,P51740,P54921,Q9QX74                                                                     |
| 3543 | 1,3,4,6,37, 2,5,7,8,33,<br>38,39,40 34,35,36 | 4 P06760,P25809,P51740,Q9QX74                                                                            |
| 3544 | 1,3,4,7,8,3 2,5,6,36,3<br>3,34,35 7,38,39,40 | 7 O70417,P00762,P08721,P36860,P51740,Q63475,Q9QX74                                                       |
| 3545 | 1,3,4,7,8,3 2,5,6,35,3<br>3,34,36 7,38,39,40 | 14 G3V686,O54728,P00762,P01681,P02625,P08721,P20646,P26772,P51740,P55091,P97840,P9808<br>9,Q62635,Q9QX74 |
| 3546 | 1,3,4,7,8,3 2,5,6,35,3<br>3,34,37 6,38,39,40 | 6 P0C0A9,P51740,P55091,P98089,Q62635,Q6AYQ8                                                              |
| 3547 | 1,3,4,7,8,3 2,5,6,35,3<br>3,34,38 6,37,39,40 | 7 O70417,P00762,P02091,P02625,P35280,Q63475,Q9EQS0                                                       |
| 3548 | 1,3,4,7,8,3 2,5,6,35,3<br>3,34,39 6,37,38,40 | 10 P00762,P02651,P04276,Q5I0J9,Q5RKI1,Q63514,Q64093,Q6AYQ8,Q9QX74,Q9Z0V6                                 |
| 3549 | 1,3,4,7,8,3 2,5,6,35,3<br>3,34,40 6,37,38,39 | 3 P00762,P01681,Q63475                                                                                   |
| 3550 | 1,3,4,7,8,3 2,5,6,34,3<br>3,35,36 7,38,39,40 | 7 O54728,O70417,P01681,P08721,P51740,P97840,Q920G2                                                       |
| 3551 | 1,3,4,7,8,3 2,5,6,34,3<br>3,35,37 6,38,39,40 | 3 P36860,P48032,P51740                                                                                   |

|      |                                              |    |                                                                              |
|------|----------------------------------------------|----|------------------------------------------------------------------------------|
| 3552 | 1,3,4,7,8,3 2,5,6,34,3<br>3,35,38 6,37,39,40 | 2  | O70417,P35280                                                                |
| 3553 | 1,3,4,7,8,3 2,5,6,34,3<br>3,35,39 6,37,38,40 | 3  | P01681,Q4KLZ6,Q5RKI1                                                         |
| 3554 | 1,3,4,7,8,3 2,5,6,34,3<br>3,35,40 6,37,38,39 | 2  | O70417,P01681                                                                |
| 3555 | 1,3,4,7,8,3 2,5,6,34,3<br>3,36,37 5,38,39,40 | 11 | O54728,P01681,P08723,P0C0A9,P47967,P51740,P55091,P97840,P98089,Q62635,Q63493 |
| 3556 | 1,3,4,7,8,3 2,5,6,34,3<br>3,36,38 5,37,39,40 | 4  | O54728,O70417,P01681,P35280                                                  |
| 3557 | 1,3,4,7,8,3 2,5,6,34,3<br>3,36,39 5,37,38,40 | 4  | O54728,P01681,Q5I0J9,Q5RKI1                                                  |
| 3558 | 1,3,4,7,8,3 2,5,6,34,3<br>3,36,40 5,37,38,39 | 2  | O54728,P01681                                                                |
| 3559 | 1,3,4,7,8,3 2,5,6,34,3<br>3,37,38 5,36,39,40 | 4  | O70417,P35280,Q6IFW6,Q9EQS0                                                  |
| 3560 | 1,3,4,7,8,3 2,5,6,34,3<br>3,37,39 5,36,38,40 | 5  | P04916,P0C0A9,P21674,Q5RKI1,Q6AYQ8                                           |
| 3561 | 1,3,4,7,8,3 2,5,6,34,3<br>3,37,40 5,36,38,39 | 4  | P01681,P0C0A9,Q6AYQ8,Q9QW07                                                  |
| 3562 | 1,3,4,7,8,3 2,5,6,34,3<br>3,38,39 5,36,37,40 | 9  | O70417,P02770,P04276,P25236,P35280,Q5RKI1,Q64093,Q6AYQ8,Q9EQS0               |
| 3563 | 1,3,4,7,8,3 2,5,6,34,3<br>3,38,40 5,36,37,39 | 3  | O70417,P01681,P35280                                                         |
| 3564 | 1,3,4,7,8,3 2,5,6,34,3<br>3,39,40 5,36,37,38 | 5  | P01681,P21674,Q5I0J9,Q5RKI1,Q6AYQ8                                           |
| 3565 | 1,3,4,7,8,3 2,5,6,33,3<br>4,35,36 7,38,39,40 | 7  | P01039,P36860,P51740,P55091,P97840,Q68G31,Q9Z1F2                             |
| 3566 | 1,3,4,7,8,3 2,5,6,33,3<br>4,35,37 6,38,39,40 | 5  | P01039,P36860,P51740,P55091,Q923V8                                           |
| 3567 | 1,3,4,7,8,3 2,5,6,33,3<br>4,35,38 6,37,39,40 | 6  | D3ZTX0,O70417,P01039,P02091,P35280,P36860                                    |
| 3568 | 1,3,4,7,8,3 2,5,6,33,3<br>4,35,39 6,37,38,40 | 4  | P01039,P36860,Q9Z0V6,Q9Z1F2                                                  |
| 3569 | 1,3,4,7,8,3 2,5,6,33,3<br>4,35,40 6,37,38,39 | 4  | P10758,P36860,P97580,Q68G31                                                  |
| 3570 | 1,3,4,7,8,3 2,5,6,33,3<br>4,36,37 5,38,39,40 | 10 | P01039,P0C0A9,P47967,P49134,P51740,P55091,P97840,P98089,Q62635,Q68G31        |
| 3571 | 1,3,4,7,8,3 2,5,6,33,3<br>4,36,38 5,37,39,40 | 6  | O70417,P01039,P02091,P02625,P35280,Q9EQS0                                    |

|      |                        |                          |    |                                                                       |
|------|------------------------|--------------------------|----|-----------------------------------------------------------------------|
| 3572 | 1,3,4,7,8,3<br>4,36,39 | 2,5,6,33,3<br>5,37,38,40 | 6  | P01039,Q5I0J9,Q64093,Q68G31,Q9Z0V6,Q9Z1F2                             |
| 3573 | 1,3,4,7,8,3<br>4,36,40 | 2,5,6,33,3<br>5,37,38,39 | 1  | Q68G31                                                                |
| 3574 | 1,3,4,7,8,3<br>4,37,38 | 2,5,6,33,3<br>5,36,39,40 | 8  | O70417,P01039,P02091,P35280,P49134,Q6IFW6,Q6IG02,Q9EQS0               |
| 3575 | 1,3,4,7,8,3<br>4,37,39 | 2,5,6,33,3<br>5,36,38,40 | 7  | P01039,P49134,P63029,Q6AYQ8,Q6IFW6,Q923V8,Q9Z0V6                      |
| 3576 | 1,3,4,7,8,3<br>4,37,40 | 2,5,6,33,3<br>5,36,38,39 | 4  | P49134,Q6IFW6,Q923V8,Q9QW07                                           |
| 3577 | 1,3,4,7,8,3<br>4,38,39 | 2,5,6,33,3<br>5,36,37,40 | 9  | O70417,P02091,P02770,P35280,Q64093,Q6IFW6,Q8R431,Q9EQS0,Q9Z0V6        |
| 3578 | 1,3,4,7,8,3<br>4,38,40 | 2,5,6,33,3<br>5,36,37,39 | 10 | D3ZTX0,O70417,P02091,P10758,P15399,P35280,P49134,P97580,Q30KJ2,Q6IFW6 |
| 3579 | 1,3,4,7,8,3<br>4,39,40 | 2,5,6,33,3<br>5,36,37,38 | 6  | P10758,P49134,P97580,Q5I0J9,Q68G31,Q9Z0V6                             |
| 3580 | 1,3,4,7,8,3<br>5,36,37 | 2,5,6,33,3<br>4,38,39,40 | 8  | P01039,P19132,P47967,P51740,P55091,P97829,P97840,Q5I0D1               |
| 3581 | 1,3,4,7,8,3<br>5,36,38 | 2,5,6,33,3<br>4,37,39,40 | 5  | O70417,P01039,P19218,P35280,P97840                                    |
| 3582 | 1,3,4,7,8,3<br>5,36,39 | 2,5,6,33,3<br>4,37,38,40 | 4  | P01039,P97829,Q62714,Q9Z1F2                                           |
| 3583 | 1,3,4,7,8,3<br>5,36,40 | 2,5,6,33,3<br>4,37,38,39 | 3  | P02793;Q7TP54,P19132,P97829                                           |
| 3584 | 1,3,4,7,8,3<br>5,37,38 | 2,5,6,33,3<br>4,36,39,40 | 6  | O70417,P01039,P19218,P35280,P36860,Q99MH3                             |
| 3585 | 1,3,4,7,8,3<br>5,37,39 | 2,5,6,33,3<br>4,36,38,40 | 4  | P01039,P36860,P63029,P97829                                           |
| 3586 | 1,3,4,7,8,3<br>5,37,40 | 2,5,6,33,3<br>4,36,38,39 | 4  | P19132,P36860,P97829,Q99041                                           |
| 3587 | 1,3,4,7,8,3<br>5,38,39 | 2,5,6,33,3<br>4,36,37,40 | 2  | O70417,P35280                                                         |
| 3588 | 1,3,4,7,8,3<br>5,38,40 | 2,5,6,33,3<br>4,36,37,39 | 5  | D3ZTX0,O70417,P10758,P35280,Q99MH3                                    |
| 3589 | 1,3,4,7,8,3<br>5,39,40 | 2,5,6,33,3<br>4,36,37,38 | 2  | P10758,P36860                                                         |
| 3590 | 1,3,4,7,8,3<br>6,37,38 | 2,5,6,33,3<br>4,35,39,40 | 6  | O70417,P01039,P35280,P97829,P97840,Q9EQS0                             |
| 3591 | 1,3,4,7,8,3<br>6,37,39 | 2,5,6,33,3<br>4,35,38,40 | 3  | P01039,P63029,P97829                                                  |



|      |                         |                          |    |                                                                       |
|------|-------------------------|--------------------------|----|-----------------------------------------------------------------------|
| 3592 | 1,3,4,7,8,3<br>6,37,40  | 2,5,6,33,3<br>4,35,38,39 | 4  | P19132,P49134,P97829,P97840                                           |
| 3593 | 1,3,4,7,8,3<br>6,38,39  | 2,5,6,33,3<br>4,35,37,40 | 4  | O70417,P35280,Q64093,Q9EQS0                                           |
| 3594 | 1,3,4,7,8,3<br>6,38,40  | 2,5,6,33,3<br>4,35,37,39 | 3  | D3ZTX0,O70417,P35280                                                  |
| 3595 | 1,3,4,7,8,3<br>6,39,40  | 2,5,6,33,3<br>4,35,37,38 | 2  | P97829,Q5I0J9                                                         |
| 3596 | 1,3,4,7,8,3<br>7,38,39  | 2,5,6,33,3<br>4,35,36,40 | 6  | D3ZUC6,P02770,P35280,Q6IFW6,Q6IG02,Q9EQS0                             |
| 3597 | 1,3,4,7,8,3<br>7,38,40  | 2,5,6,33,3<br>4,35,36,39 | 6  | D3ZUC6,O70417,P35280,P49134,Q6IFW6,Q99MH3                             |
| 3598 | 1,3,4,7,8,3<br>7,39,40  | 2,5,6,33,3<br>4,35,36,38 | 6  | D3ZUC6,P21674,P49134,P63029,P97829,Q6AYQ8                             |
| 3599 | 1,3,4,7,8,3<br>8,39,40  | 2,5,6,33,3<br>4,35,36,37 | 7  | D3ZTX0,D3ZUC6,O70417,P02770,P10758,P35280,Q5QE79                      |
| 3600 | 1,3,4,7,33,<br>34,35,36 | 2,5,6,8,37,<br>38,39,40  | 9  | P08721,P25031,P51740,P55091,P97840,Q5I0D7,Q62635,Q6PCU2,Q920G2        |
| 3601 | 1,3,4,7,33,<br>34,35,37 | 2,5,6,8,36,<br>38,39,40  | 5  | B0BNN3,P25031,P51740,P97840,Q64119                                    |
| 3602 | 1,3,4,7,33,<br>34,35,38 | 2,5,6,8,36,<br>37,39,40  | 2  | P08721,P80299                                                         |
| 3603 | 1,3,4,7,33,<br>34,35,39 | 2,5,6,8,36,<br>37,38,40  | 1  | Q5RKI1                                                                |
| 3604 | 1,3,4,7,33,<br>34,35,40 | 2,5,6,8,36,<br>37,38,39  | 0  |                                                                       |
| 3605 | 1,3,4,7,33,<br>34,36,37 | 2,5,6,8,35,<br>38,39,40  | 10 | P08721,P08723,P25031,P47967,P51740,P55091,P97840,P98089,Q5EGZ1,Q62635 |
| 3606 | 1,3,4,7,33,<br>34,36,38 | 2,5,6,8,35,<br>37,39,40  | 4  | P02091,P08721,P80299,Q64093                                           |
| 3607 | 1,3,4,7,33,<br>34,36,39 | 2,5,6,8,35,<br>37,38,40  | 4  | P08721,Q5I0J9,Q5RKI1,Q64093                                           |
| 3608 | 1,3,4,7,33,<br>34,36,40 | 2,5,6,8,35,<br>37,38,39  | 2  | P01681,P08721                                                         |
| 3609 | 1,3,4,7,33,<br>34,37,38 | 2,5,6,8,35,<br>36,39,40  | 2  | B0BNN3,P02091                                                         |
| 3610 | 1,3,4,7,33,<br>34,37,39 | 2,5,6,8,35,<br>36,38,40  | 2  | Q5RKI1,Q6AYQ8                                                         |
| 3611 | 1,3,4,7,33,<br>34,37,40 | 2,5,6,8,35,<br>36,38,39  | 1  | Q6AYQ8                                                                |

|      |                                              |                                                    |
|------|----------------------------------------------|----------------------------------------------------|
| 3612 | 1,3,4,7,33, 2,5,6,8,35,<br>34,38,39 36,37,40 | 7 F1M3L7,P02091,P02770,P80299,Q5RKI1,Q64093,Q6AYQ8 |
| 3613 | 1,3,4,7,33, 2,5,6,8,35,<br>34,38,40 36,37,39 | 3 P10758,P80299,Q9QYP1                             |
| 3614 | 1,3,4,7,33, 2,5,6,8,35,<br>34,39,40 36,37,38 | 5 P10758,P19218,Q5RKI1,Q64093,Q6AYQ8               |
| 3615 | 1,3,4,7,33, 2,5,6,8,34,<br>35,36,37 38,39,40 | 6 P25031,P47967,P51740,P55091,P97840,Q920G2        |
| 3616 | 1,3,4,7,33, 2,5,6,8,34,<br>35,36,38 37,39,40 | 4 P01681,P08721,P97840,Q920G2                      |
| 3617 | 1,3,4,7,33, 2,5,6,8,34,<br>35,36,39 37,38,40 | 2 P01681,Q5RKI1                                    |
| 3618 | 1,3,4,7,33, 2,5,6,8,34,<br>35,36,40 37,38,39 | 2 P01681,Q920G2                                    |
| 3619 | 1,3,4,7,33, 2,5,6,8,34,<br>35,37,38 36,39,40 | 1 B0BNN3                                           |
| 3620 | 1,3,4,7,33, 2,5,6,8,34,<br>35,37,39 36,38,40 | 1 Q5RKI1                                           |
| 3621 | 1,3,4,7,33, 2,5,6,8,34,<br>35,37,40 36,38,39 | 0                                                  |
| 3622 | 1,3,4,7,33, 2,5,6,8,34,<br>35,38,39 36,37,40 | 3 P02770,Q5RKI1,Q9JJ50                             |
| 3623 | 1,3,4,7,33, 2,5,6,8,34,<br>35,38,40 36,37,39 | 1 P10758                                           |
| 3624 | 1,3,4,7,33, 2,5,6,8,34,<br>35,39,40 36,37,38 | 2 P10758,Q5RKI1                                    |
| 3625 | 1,3,4,7,33, 2,5,6,8,34,<br>36,37,38 35,39,40 | 1 P97840                                           |
| 3626 | 1,3,4,7,33, 2,5,6,8,34,<br>36,37,39 35,38,40 | 2 Q5RKI1,Q6AYQ8                                    |
| 3627 | 1,3,4,7,33, 2,5,6,8,34,<br>36,37,40 35,38,39 | 3 P01681,P25809,P97840                             |
| 3628 | 1,3,4,7,33, 2,5,6,8,34,<br>36,38,39 35,37,40 | 2 Q5RKI1,Q64093                                    |
| 3629 | 1,3,4,7,33, 2,5,6,8,34,<br>36,38,40 35,37,39 | 2 P01681,P25809                                    |
| 3630 | 1,3,4,7,33, 2,5,6,8,34,<br>36,39,40 35,37,38 | 4 P01681,P25809,Q5I0J9,Q5RKI1                      |
| 3631 | 1,3,4,7,33, 2,5,6,8,34,<br>37,38,39 35,36,40 | 4 P02770,Q5RKI1,Q64093,Q6AYQ8                      |

|      |                                              |                                                           |
|------|----------------------------------------------|-----------------------------------------------------------|
| 3632 | 1,3,4,7,33, 2,5,6,8,34,<br>37,38,40 35,36,39 | 1 P25809                                                  |
| 3633 | 1,3,4,7,33, 2,5,6,8,34,<br>37,39,40 35,36,38 | 4 P21674,P25809,Q5RKI1,Q6AYQ8                             |
| 3634 | 1,3,4,7,33, 2,5,6,8,34,<br>38,39,40 35,36,37 | 5 P02770,P10758,P25809,Q5RKI1,Q64093                      |
| 3635 | 1,3,4,7,34, 2,5,6,8,33,<br>35,36,37 38,39,40 | 8 P01039,P19132,P25031,P47967,P51740,P55091,P97840,Q62635 |
| 3636 | 1,3,4,7,34, 2,5,6,8,33,<br>35,36,38 37,39,40 | 6 D3ZTX0,P01039,P02091,P25031,P97840,Q9QWN8               |
| 3637 | 1,3,4,7,34, 2,5,6,8,33,<br>35,36,39 37,38,40 | 5 P01039,P25031,Q62714,Q68G31,Q9Z1F2                      |
| 3638 | 1,3,4,7,34, 2,5,6,8,33,<br>35,36,40 37,38,39 | 2 P10758,Q68G31                                           |
| 3639 | 1,3,4,7,34, 2,5,6,8,33,<br>35,37,38 36,39,40 | 3 B0BNN3,P01039,P25031                                    |
| 3640 | 1,3,4,7,34, 2,5,6,8,33,<br>35,37,39 36,38,40 | 2 P01039,P25031                                           |
| 3641 | 1,3,4,7,34, 2,5,6,8,33,<br>35,37,40 36,38,39 | 1 P19132                                                  |
| 3642 | 1,3,4,7,34, 2,5,6,8,33,<br>35,38,39 36,37,40 | 2 D3ZTX0,P10758                                           |
| 3643 | 1,3,4,7,34, 2,5,6,8,33,<br>35,38,40 36,37,39 | 2 D3ZTX0,P10758                                           |
| 3644 | 1,3,4,7,34, 2,5,6,8,33,<br>35,39,40 36,37,38 | 1 P10758                                                  |
| 3645 | 1,3,4,7,34, 2,5,6,8,33,<br>36,37,38 35,39,40 | 5 P01039,P02091,P25031,P29315,P97840                      |
| 3646 | 1,3,4,7,34, 2,5,6,8,33,<br>36,37,39 35,38,40 | 4 P01039,P25031,P63029,Q68G31                             |
| 3647 | 1,3,4,7,34, 2,5,6,8,33,<br>36,37,40 35,38,39 | 4 P49134,P97840,Q68G31,Q811M5                             |
| 3648 | 1,3,4,7,34, 2,5,6,8,33,<br>36,38,39 35,37,40 | 3 P01946,P02091,Q64093                                    |
| 3649 | 1,3,4,7,34, 2,5,6,8,33,<br>36,38,40 35,37,39 | 3 D3ZTX0,P02091,P10758                                    |
| 3650 | 1,3,4,7,34, 2,5,6,8,33,<br>36,39,40 35,37,38 | 3 P10758,Q5I0J9,Q68G31                                    |
| 3651 | 1,3,4,7,34, 2,5,6,8,33,<br>37,38,39 35,36,40 | 2 P02091,Q64093                                           |

|      |                                              |                                                                          |
|------|----------------------------------------------|--------------------------------------------------------------------------|
| 3652 | 1,3,4,7,34, 2,5,6,8,33,<br>37,38,40 35,36,39 | 2 P49134,Q99MH3                                                          |
| 3653 | 1,3,4,7,34, 2,5,6,8,33,<br>37,39,40 35,36,38 | 2 P49134,Q6AYQ8                                                          |
| 3654 | 1,3,4,7,34, 2,5,6,8,33,<br>38,39,40 35,36,37 | 5 D3ZTX0,F1M3L7,P02770,P10758,Q64093                                     |
| 3655 | 1,3,4,7,35, 2,5,6,8,33,<br>36,37,38 34,39,40 | 3 P01039,P25031,P97840                                                   |
| 3656 | 1,3,4,7,35, 2,5,6,8,33,<br>36,37,39 34,38,40 | 4 P01039,P25031,P97829,P97840                                            |
| 3657 | 1,3,4,7,35, 2,5,6,8,33,<br>36,37,40 34,38,39 | 3 P02793;Q7TP54,P19132,P97840                                            |
| 3658 | 1,3,4,7,35, 2,5,6,8,33,<br>36,38,39 34,37,40 | 0                                                                        |
| 3659 | 1,3,4,7,35, 2,5,6,8,33,<br>36,38,40 34,37,39 | 4 D3ZTX0,P02793;Q7TP54,P10758,Q9QWN8                                     |
| 3660 | 1,3,4,7,35, 2,5,6,8,33,<br>36,39,40 34,37,38 | 1 P10758                                                                 |
| 3661 | 1,3,4,7,35, 2,5,6,8,33,<br>37,38,39 34,36,40 | 2 P08649,Q99MH3                                                          |
| 3662 | 1,3,4,7,35, 2,5,6,8,33,<br>37,38,40 34,36,39 | 3 P08649,P10758,Q99MH3                                                   |
| 3663 | 1,3,4,7,35, 2,5,6,8,33,<br>37,39,40 34,36,38 | 2 P08649,P10758                                                          |
| 3664 | 1,3,4,7,35, 2,5,6,8,33,<br>38,39,40 34,36,37 | 5 D3ZTX0,P08649,P10758,Q63751,Q99MH3                                     |
| 3665 | 1,3,4,7,36, 2,5,6,8,33,<br>37,38,39 34,35,40 | 0                                                                        |
| 3666 | 1,3,4,7,36, 2,5,6,8,33,<br>37,38,40 34,35,39 | 2 P25809,Q99MH3                                                          |
| 3667 | 1,3,4,7,36, 2,5,6,8,33,<br>37,39,40 34,35,38 | 3 O89117,P25809,P97829                                                   |
| 3668 | 1,3,4,7,36, 2,5,6,8,33,<br>38,39,40 34,35,37 | 5 D3ZTX0,O89117,P10758,P25809,Q64093                                     |
| 3669 | 1,3,4,7,37, 2,5,6,8,33,<br>38,39,40 34,35,36 | 7 D3ZUC6,O89117,P02770,P08649,P10758,Q5QE79,Q99MH3                       |
| 3670 | 1,3,4,8,33, 2,5,6,7,37,<br>34,35,36 38,39,40 | 10 O54728,P00762,P01681,P01835,P50116,P51740,P55091,Q6AY61,Q6PCU2,Q920G2 |
| 3671 | 1,3,4,8,33, 2,5,6,7,36,<br>34,35,37 38,39,40 | 5 B0BNN3,P00762,P36860,P50116,P51740                                     |

|      |                                              |                                                                          |
|------|----------------------------------------------|--------------------------------------------------------------------------|
| 3672 | 1,3,4,8,33, 2,5,6,7,36,<br>34,35,38 37,39,40 | 5 O70417,P00762,P01835,P02091,P02625                                     |
| 3673 | 1,3,4,8,33, 2,5,6,7,36,<br>34,35,39 37,38,40 | 3 P00762,P01835,P50116                                                   |
| 3674 | 1,3,4,8,33, 2,5,6,7,36,<br>34,35,40 37,38,39 | 4 P00762,P01681,P01835,P97580                                            |
| 3675 | 1,3,4,8,33, 2,5,6,7,35,<br>34,36,37 38,39,40 | 10 O54728,P00762,P01681,P08723,P50116,P51740,P55091,P98089,Q5EGZ1,Q62635 |
| 3676 | 1,3,4,8,33, 2,5,6,7,35,<br>34,36,38 37,39,40 | 6 O54728,O70417,P00762,P01681,P02091,P02625                              |
| 3677 | 1,3,4,8,33, 2,5,6,7,35,<br>34,36,39 37,38,40 | 6 G3V686,O54728,P00762,P01681,P19814,Q63514                              |
| 3678 | 1,3,4,8,33, 2,5,6,7,35,<br>34,36,40 37,38,39 | 3 O54728,P00762,P01681                                                   |
| 3679 | 1,3,4,8,33, 2,5,6,7,35,<br>34,37,38 36,39,40 | 7 B0BNN3,P00762,P02091,P02625,Q6IFW6,Q6IG02,Q9EQS0                       |
| 3680 | 1,3,4,8,33, 2,5,6,7,35,<br>34,37,39 36,38,40 | 5 P00762,P19814,P50116,Q6AYQ8,Q9QWN8                                     |
| 3681 | 1,3,4,8,33, 2,5,6,7,35,<br>34,37,40 36,38,39 | 5 P00762,P13432,P19814,P50116,Q923V8                                     |
| 3682 | 1,3,4,8,33, 2,5,6,7,35,<br>34,38,39 36,37,40 | 5 P00762,P02091,P19132,Q64093,Q9EQS0                                     |
| 3683 | 1,3,4,8,33, 2,5,6,7,35,<br>34,38,40 36,37,39 | 8 O70417,P00762,P01681,P02091,P02625,P15399,P97580,Q30KJ2                |
| 3684 | 1,3,4,8,33, 2,5,6,7,35,<br>34,39,40 36,37,38 | 6 P00762,P01681,P15399,P19218,P19814,P97580                              |
| 3685 | 1,3,4,8,33, 2,5,6,7,34,<br>35,36,37 38,39,40 | 9 O54728,P01039,P01681,P08723,P50116,P51740,P55091,Q6AY61,Q920G2         |
| 3686 | 1,3,4,8,33, 2,5,6,7,34,<br>35,36,38 37,39,40 | 5 O54728,O70417,P01681,P01835,Q6AY61                                     |
| 3687 | 1,3,4,8,33, 2,5,6,7,34,<br>35,36,39 37,38,40 | 8 O54728,P01681,P01835,P20767,P50116,P62804,Q62714,Q6AY61                |
| 3688 | 1,3,4,8,33, 2,5,6,7,34,<br>35,36,40 37,38,39 | 6 O54728,P01681,P01835,P50116,Q6AY61,Q920G2                              |
| 3689 | 1,3,4,8,33, 2,5,6,7,34,<br>35,37,38 36,39,40 | 1 B0BNN3                                                                 |
| 3690 | 1,3,4,8,33, 2,5,6,7,34,<br>35,37,39 36,38,40 | 1 P50116                                                                 |
| 3691 | 1,3,4,8,33, 2,5,6,7,34,<br>35,37,40 36,38,39 | 2 P01681,P50116                                                          |

|      |                                              |                                                    |
|------|----------------------------------------------|----------------------------------------------------|
| 3692 | 1,3,4,8,33, 2,5,6,7,34,<br>35,38,39 36,37,40 | 4 O70417,P01681,P01835,Q9JJ50                      |
| 3693 | 1,3,4,8,33, 2,5,6,7,34,<br>35,38,40 36,37,39 | 3 O70417,P01681,P01835                             |
| 3694 | 1,3,4,8,33, 2,5,6,7,34,<br>35,39,40 36,37,38 | 4 P01681,P01835,P50116,P62804                      |
| 3695 | 1,3,4,8,33, 2,5,6,7,34,<br>36,37,38 35,39,40 | 3 O54728,P01681,P08723                             |
| 3696 | 1,3,4,8,33, 2,5,6,7,34,<br>36,37,39 35,38,40 | 3 O54728,P01681,P50116                             |
| 3697 | 1,3,4,8,33, 2,5,6,7,34,<br>36,37,40 35,38,39 | 4 O54728,P01681,P08723,P50116                      |
| 3698 | 1,3,4,8,33, 2,5,6,7,34,<br>36,38,39 35,37,40 | 2 O54728,P01681                                    |
| 3699 | 1,3,4,8,33, 2,5,6,7,34,<br>36,38,40 35,37,39 | 3 O54728,O70417,P01681                             |
| 3700 | 1,3,4,8,33, 2,5,6,7,34,<br>36,39,40 35,37,38 | 2 O54728,P01681                                    |
| 3701 | 1,3,4,8,33, 2,5,6,7,34,<br>37,38,39 35,36,40 | 3 Q6IFW6,Q6IG02,Q9EQS0                             |
| 3702 | 1,3,4,8,33, 2,5,6,7,34,<br>37,38,40 35,36,39 | 4 B0BNN3,P01681,Q6IFW6,Q9Z1F2                      |
| 3703 | 1,3,4,8,33, 2,5,6,7,34,<br>37,39,40 35,36,38 | 5 P01681,P21674,P50116,Q6AYQ8,Q9QWN8               |
| 3704 | 1,3,4,8,33, 2,5,6,7,34,<br>38,39,40 35,36,37 | 1 P01681                                           |
| 3705 | 1,3,4,8,34, 2,5,6,7,33,<br>35,36,37 38,39,40 | 5 P00762,P01039,P50116,P51740,P55091               |
| 3706 | 1,3,4,8,34, 2,5,6,7,33,<br>35,36,38 37,39,40 | 6 D3ZTX0,O70417,P00762,P01039,P02091,P02625        |
| 3707 | 1,3,4,8,34, 2,5,6,7,33,<br>35,36,39 37,38,40 | 6 P00762,P01039,P50116,Q62714,Q6AY61,Q9Z1F2        |
| 3708 | 1,3,4,8,34, 2,5,6,7,33,<br>35,36,40 37,38,39 | 4 D3ZTX0,P00762,P50116,Q6AY61                      |
| 3709 | 1,3,4,8,34, 2,5,6,7,33,<br>35,37,38 36,39,40 | 7 B0BNN3,P00762,P01039,P02091,P36860,Q6IFW6,Q6IG02 |
| 3710 | 1,3,4,8,34, 2,5,6,7,33,<br>35,37,39 36,38,40 | 4 P01039,P36860,P50116,Q923V8                      |
| 3711 | 1,3,4,8,34, 2,5,6,7,33,<br>35,37,40 36,38,39 | 5 P15399,P36860,P50115,P50116,Q923V8               |

|      |                                              |                                                                          |
|------|----------------------------------------------|--------------------------------------------------------------------------|
| 3712 | 1,3,4,8,34, 2,5,6,7,33,<br>35,38,39 36,37,40 | 5 D3ZTX0,P00762,P02091,P97580,Q30KJ2                                     |
| 3713 | 1,3,4,8,34, 2,5,6,7,33,<br>35,38,40 36,37,39 | 7 D3ZTX0,O70417,P00762,P10758,P15399,P97580,Q30KJ2                       |
| 3714 | 1,3,4,8,34, 2,5,6,7,33,<br>35,39,40 36,37,38 | 7 D3ZTX0,P10758,P15399,P36860,P50116,P97580,Q30KJ2                       |
| 3715 | 1,3,4,8,34, 2,5,6,7,33,<br>36,37,38 35,39,40 | 7 P00762,P01039,P02091,P02625,P29315,Q6IFW6,Q6IG02                       |
| 3716 | 1,3,4,8,34, 2,5,6,7,33,<br>36,37,39 35,38,40 | 2 P01039,P50116                                                          |
| 3717 | 1,3,4,8,34, 2,5,6,7,33,<br>36,37,40 35,38,39 | 3 P13432,P49134,P50116                                                   |
| 3718 | 1,3,4,8,34, 2,5,6,7,33,<br>36,38,39 35,37,40 | 4 D3ZTX0,P00762,P01946,P02091                                            |
| 3719 | 1,3,4,8,34, 2,5,6,7,33,<br>36,38,40 35,37,39 | 7 D3ZTX0,O70417,P00762,P02091,P15399,P97580,Q30KJ2                       |
| 3720 | 1,3,4,8,34, 2,5,6,7,33,<br>36,39,40 35,37,38 | 3 P15399,P50116,P97580                                                   |
| 3721 | 1,3,4,8,34, 2,5,6,7,33,<br>37,38,39 35,36,40 | 5 P02091,P49134,Q6IFW6,Q6IG02,Q9EQS0                                     |
| 3722 | 1,3,4,8,34, 2,5,6,7,33,<br>37,38,40 35,36,39 | 10 D3ZTX0,P00762,P02091,P15399,P49134,P97580,Q30KJ2,Q4FZU2,Q6IFW6,Q6IG02 |
| 3723 | 1,3,4,8,34, 2,5,6,7,33,<br>37,39,40 35,36,38 | 7 P15399,P49134,P50116,P97580,Q6IFW6,Q6IG02,Q923V8                       |
| 3724 | 1,3,4,8,34, 2,5,6,7,33,<br>38,39,40 35,36,37 | 8 D3ZTX0,P00762,P02091,P10758,P15399,P97580,Q30KJ2,Q6IFW6                |
| 3725 | 1,3,4,8,35, 2,5,6,7,33,<br>36,37,38 34,39,40 | 3 P01039,P19218,P50116                                                   |
| 3726 | 1,3,4,8,35, 2,5,6,7,33,<br>36,37,39 34,38,40 | 6 P01039,P50116,P80299,P97829,Q62714,Q6AY61                              |
| 3727 | 1,3,4,8,35, 2,5,6,7,33,<br>36,37,40 34,38,39 | 7 P02793;Q7TP54,P19132,P50115,P50116,P60905,P80299,P97829                |
| 3728 | 1,3,4,8,35, 2,5,6,7,33,<br>36,38,39 34,37,40 | 4 D3ZTX0,P01039,Q62714,Q6AY61                                            |
| 3729 | 1,3,4,8,35, 2,5,6,7,33,<br>36,38,40 34,37,39 | 4 D3ZTX0,O70417,P02793;Q7TP54,Q6AY61                                     |
| 3730 | 1,3,4,8,35, 2,5,6,7,33,<br>36,39,40 34,37,38 | 4 P50116,P54921,P97829,Q6AY61                                            |
| 3731 | 1,3,4,8,35, 2,5,6,7,33,<br>37,38,39 34,36,40 | 3 P01039,P50116,Q6IG02                                                   |

|      |                                              |                                                                  |
|------|----------------------------------------------|------------------------------------------------------------------|
| 3732 | 1,3,4,8,35, 2,5,6,7,33,<br>37,38,40 34,36,39 | 3 D3ZTX0,Q6IG02,Q99MH3                                           |
| 3733 | 1,3,4,8,35, 2,5,6,7,33,<br>37,39,40 34,36,38 | 3 P50116,P80299,P97829                                           |
| 3734 | 1,3,4,8,35, 2,5,6,7,33,<br>38,39,40 34,36,37 | 7 D3ZTX0,P00774,P10758,P54921,P98089,Q63751,Q9JJ50               |
| 3735 | 1,3,4,8,36, 2,5,6,7,33,<br>37,38,39 34,35,40 | 3 P01039,P97829,Q9EQS0                                           |
| 3736 | 1,3,4,8,36, 2,5,6,7,33,<br>37,38,40 34,35,39 | 0                                                                |
| 3737 | 1,3,4,8,36, 2,5,6,7,33,<br>37,39,40 34,35,38 | 4 P50116,P80299,P97829,Q9R168                                    |
| 3738 | 1,3,4,8,36, 2,5,6,7,33,<br>38,39,40 34,35,37 | 2 D3ZTX0,P54921                                                  |
| 3739 | 1,3,4,8,37, 2,5,6,7,33,<br>38,39,40 34,35,36 | 5 D3ZUC6,P08721,Q5I0D7,Q6IFW6,Q6IG02                             |
| 3740 | 1,3,4,33,3 2,5,6,7,8,3<br>4,35,36,37 8,39,40 | 9 P25031,P50115,P50116,P51740,P55091,Q5QE79,Q62635,Q6PCU2,Q920G2 |
| 3741 | 1,3,4,33,3 2,5,6,7,8,3<br>4,35,36,38 7,39,40 | 2 P00762,P02091                                                  |
| 3742 | 1,3,4,33,3 2,5,6,7,8,3<br>4,35,36,39 7,38,40 | 6 P01681,P01835,P25031,P50116,Q62714,Q6PCU2                      |
| 3743 | 1,3,4,33,3 2,5,6,7,8,3<br>4,35,36,40 7,38,39 | 6 P00762,P01681,P50115,P50116,Q6PCU2,Q920G2                      |
| 3744 | 1,3,4,33,3 2,5,6,7,8,3<br>4,35,37,38 6,39,40 | 4 B0BNN3,P00762,P02091,Q64119                                    |
| 3745 | 1,3,4,33,3 2,5,6,7,8,3<br>4,35,37,39 6,38,40 | 4 B0BNN3,P25031,P50115,P50116                                    |
| 3746 | 1,3,4,33,3 2,5,6,7,8,3<br>4,35,37,40 6,38,39 | 3 B0BNN3,P50115,P50116                                           |
| 3747 | 1,3,4,33,3 2,5,6,7,8,3<br>4,35,38,39 6,37,40 | 3 P00762,P02091,Q9JJ50                                           |
| 3748 | 1,3,4,33,3 2,5,6,7,8,3<br>4,35,38,40 6,37,39 | 2 P00762,Q06000                                                  |
| 3749 | 1,3,4,33,3 2,5,6,7,8,3<br>4,35,39,40 6,37,38 | 3 P19218,P50115,P50116                                           |
| 3750 | 1,3,4,33,3 2,5,6,7,8,3<br>4,36,37,38 5,39,40 | 4 B0BNN3,P00762,P02091,P29315                                    |
| 3751 | 1,3,4,33,3 2,5,6,7,8,3<br>4,36,37,39 5,38,40 | 6 P19814,P25031,P36374,P50116,P98089,Q62635                      |



|      |                                              |                                                           |
|------|----------------------------------------------|-----------------------------------------------------------|
| 3752 | 1,3,4,33,3 2,5,6,7,8,3<br>4,36,37,40 5,38,39 | 4 P01681,P19814,P50115,P50116                             |
| 3753 | 1,3,4,33,3 2,5,6,7,8,3<br>4,36,38,39 5,37,40 | 5 P00762,P01946,P02091,Q64093,Q99041                      |
| 3754 | 1,3,4,33,3 2,5,6,7,8,3<br>4,36,38,40 5,37,39 | 3 P00762,P01681,P02091                                    |
| 3755 | 1,3,4,33,3 2,5,6,7,8,3<br>4,36,39,40 5,37,38 | 3 P01681,P19218,P19814                                    |
| 3756 | 1,3,4,33,3 2,5,6,7,8,3<br>4,37,38,39 5,36,40 | 3 B0BNN3,P02091,Q9EQV9                                    |
| 3757 | 1,3,4,33,3 2,5,6,7,8,3<br>4,37,38,40 5,36,39 | 3 B0BNN3,P02091,Q9Z1F2                                    |
| 3758 | 1,3,4,33,3 2,5,6,7,8,3<br>4,37,39,40 5,36,38 | 5 P19218,P19814,P50115,P50116,Q6AYQ8                      |
| 3759 | 1,3,4,33,3 2,5,6,7,8,3<br>4,38,39,40 5,36,37 | 4 P02091,P10758,P19218,Q64093                             |
| 3760 | 1,3,4,33,3 2,5,6,7,8,3<br>5,36,37,38 4,39,40 | 3 B0BNN3,P20762,Q9Z0V6                                    |
| 3761 | 1,3,4,33,3 2,5,6,7,8,3<br>5,36,37,39 4,38,40 | 4 P25031,P50115,P50116,P62804                             |
| 3762 | 1,3,4,33,3 2,5,6,7,8,3<br>5,36,37,40 4,38,39 | 8 P01681,P20762,P50115,P50116,P60905,Q920G2,Q9WTT6,Q9Z0V6 |
| 3763 | 1,3,4,33,3 2,5,6,7,8,3<br>5,36,38,39 4,37,40 | 4 P01681,P06760,P62804,Q9JJ50                             |
| 3764 | 1,3,4,33,3 2,5,6,7,8,3<br>5,36,38,40 4,37,39 | 5 P01681,P06760,P62804,Q920G2,Q9Z0V6                      |
| 3765 | 1,3,4,33,3 2,5,6,7,8,3<br>5,36,39,40 4,37,38 | 5 P01681,P06760,P50115,P50116,P62804                      |
| 3766 | 1,3,4,33,3 2,5,6,7,8,3<br>5,37,38,39 4,36,40 | 1 B0BNN3                                                  |
| 3767 | 1,3,4,33,3 2,5,6,7,8,3<br>5,37,38,40 4,36,39 | 3 B0BNN3,Q9Z0V6,Q9Z1F2                                    |
| 3768 | 1,3,4,33,3 2,5,6,7,8,3<br>5,37,39,40 4,36,38 | 2 P50115,P50116                                           |
| 3769 | 1,3,4,33,3 2,5,6,7,8,3<br>5,38,39,40 4,36,37 | 5 P06760,P10758,P62804,Q00715,Q9JJ50                      |
| 3770 | 1,3,4,33,3 2,5,6,7,8,3<br>6,37,38,39 4,35,40 | 0                                                         |
| 3771 | 1,3,4,33,3 2,5,6,7,8,3<br>6,37,38,40 4,35,39 | 6 P01681,P20762,P25809,Q9WTT6,Q9Z0V6,Q9Z1F2               |

|      |                                              |                                                           |
|------|----------------------------------------------|-----------------------------------------------------------|
| 3772 | 1,3,4,33,3 2,5,6,7,8,3<br>6,37,39,40 4,35,38 | 4 P01681,P25809,P50115,P50116                             |
| 3773 | 1,3,4,33,3 2,5,6,7,8,3<br>6,38,39,40 4,35,37 | 4 P01681,P06760,P25809,P48199                             |
| 3774 | 1,3,4,33,3 2,5,6,7,8,3<br>7,38,39,40 4,35,36 | 2 P48199,Q9Z1F2                                           |
| 3775 | 1,3,4,34,3 2,5,6,7,8,3<br>5,36,37,38 3,39,40 | 5 O54858,P01039,P02091,P25031,P29315                      |
| 3776 | 1,3,4,34,3 2,5,6,7,8,3<br>5,36,37,39 3,38,40 | 5 O54858,P01039,P25031,P50115,P50116                      |
| 3777 | 1,3,4,34,3 2,5,6,7,8,3<br>5,36,37,40 3,38,39 | 4 O54858,P19132,P50115,P50116                             |
| 3778 | 1,3,4,34,3 2,5,6,7,8,3<br>5,36,38,39 3,37,40 | 4 D3ZTX0,O54858,P02091,Q62714                             |
| 3779 | 1,3,4,34,3 2,5,6,7,8,3<br>5,36,38,40 3,37,39 | 2 D3ZTX0,P02091                                           |
| 3780 | 1,3,4,34,3 2,5,6,7,8,3<br>5,36,39,40 3,37,38 | 4 D3ZTX0,P10758,P50115,P50116                             |
| 3781 | 1,3,4,34,3 2,5,6,7,8,3<br>5,37,38,39 3,36,40 | 2 B0BNN3,O54858                                           |
| 3782 | 1,3,4,34,3 2,5,6,7,8,3<br>5,37,38,40 3,36,39 | 5 B0BNN3,D3ZTX0,O54858,P16636,P50115                      |
| 3783 | 1,3,4,34,3 2,5,6,7,8,3<br>5,37,39,40 3,36,38 | 3 O54858,P50115,P50116                                    |
| 3784 | 1,3,4,34,3 2,5,6,7,8,3<br>5,38,39,40 3,36,37 | 4 D3ZTX0,P10758,P16636,Q63751                             |
| 3785 | 1,3,4,34,3 2,5,6,7,8,3<br>6,37,38,39 3,35,40 | 4 O54858,P02091,P25031,P29315                             |
| 3786 | 1,3,4,34,3 2,5,6,7,8,3<br>6,37,38,40 3,35,39 | 5 D3ZTX0,O54858,P02091,P29315,Q4KLZ6                      |
| 3787 | 1,3,4,34,3 2,5,6,7,8,3<br>6,37,39,40 3,35,38 | 3 O54858,P50115,P50116                                    |
| 3788 | 1,3,4,34,3 2,5,6,7,8,3<br>6,38,39,40 3,35,37 | 5 D3ZTX0,O54858,P01946,P02091,P10758                      |
| 3789 | 1,3,4,34,3 2,5,6,7,8,3<br>7,38,39,40 3,35,36 | 2 D3ZTX0,O54858                                           |
| 3790 | 1,3,4,35,3 2,5,6,7,8,3<br>6,37,38,39 3,34,40 | 5 O54858,P01039,P02631,P25031,P50116                      |
| 3791 | 1,3,4,35,3 2,5,6,7,8,3<br>6,37,38,40 3,34,39 | 7 D3ZTX0,O54858,P02793;Q7TP54,P50115,Q99MH3,Q9QX74,Q9Z0V6 |

|      |                          |                               |    |                                                                              |
|------|--------------------------|-------------------------------|----|------------------------------------------------------------------------------|
| 3792 | 1,3,4,35,3<br>6,37,39,40 | 2,5,6,7,8,3<br>3,34,38        | 4  | O54858,P50115,P50116,P97829                                                  |
| 3793 | 1,3,4,35,3<br>6,38,39,40 | 2,5,6,7,8,3<br>3,34,37        | 5  | D3ZTX0,O54858,P06760,P10758,Q63751                                           |
| 3794 | 1,3,4,35,3<br>7,38,39,40 | 2,5,6,7,8,3<br>3,34,36        | 11 | D3ZTX0,O54858,P06760,P08649,P10758,P16636,Q63751,Q99MH3,Q9QW30,Q9QX74,Q9QZQ5 |
| 3795 | 1,3,4,36,3<br>7,38,39,40 | 2,5,6,7,8,3<br>3,34,35        | 4  | O54858,O89117,P25809,Q9QX74                                                  |
| 3796 | 1,3,5,6,7,8<br>,33,34    | 2,4,35,36,<br>37,38,39,4<br>0 | 7  | P08721,P98089,Q09030,Q62635,Q6IG05,Q91XN4,Q9QX74                             |
| 3797 | 1,3,5,6,7,8<br>,33,35    | 2,4,34,36,<br>37,38,39,4<br>0 | 2  | Q09030,Q4KLZ6                                                                |
| 3798 | 1,3,5,6,7,8<br>,33,36    | 2,4,34,35,<br>37,38,39,4<br>0 | 10 | P00774,P01681,P08721,P19223,P47967,P55091,P98089,Q09030,Q62635,Q91XN4        |
| 3799 | 1,3,5,6,7,8<br>,33,37    | 2,4,34,35,<br>36,38,39,4<br>0 | 5  | P47967,P55091,P98089,Q09030,Q62635                                           |
| 3800 | 1,3,5,6,7,8<br>,33,38    | 2,4,34,35,<br>36,37,39,4<br>0 | 5  | P35280,P50115,Q09030,Q6IG05,Q91XN4                                           |
| 3801 | 1,3,5,6,7,8<br>,33,39    | 2,4,34,35,<br>36,37,38,4<br>0 | 3  | Q09030,Q4KLZ6,Q5RKI1                                                         |
| 3802 | 1,3,5,6,7,8<br>,33,40    | 2,4,34,35,<br>36,37,38,3<br>9 | 4  | P25031,Q09030,Q62714,Q91XN4                                                  |
| 3803 | 1,3,5,6,7,8<br>,34,35    | 2,4,33,36,<br>37,38,39,4<br>0 | 1  | P36374                                                                       |
| 3804 | 1,3,5,6,7,8<br>,34,36    | 2,4,33,35,<br>37,38,39,4<br>0 | 7  | P19223,P47967,P55091,P98089,Q62635,Q68G31,Q91XN4                             |
| 3805 | 1,3,5,6,7,8<br>,34,37    | 2,4,33,35,<br>36,38,39,4<br>0 | 5  | P47967,P49134,P55091,P98089,Q62635                                           |
| 3806 | 1,3,5,6,7,8<br>,34,38    | 2,4,33,35,<br>36,37,39,4<br>0 | 6  | P01946,P02091,P35280,P36374,P49134,Q6IG05                                    |

|      |                       |                               |    |                                                                                            |
|------|-----------------------|-------------------------------|----|--------------------------------------------------------------------------------------------|
| 3807 | 1,3,5,6,7,8<br>,34,39 | 2,4,33,35,<br>36,37,38,4<br>0 | 7  | P02651,P36374,P49134,Q68G31,Q9QX79,Q9Z0V6,Q9Z1F2                                           |
| 3808 | 1,3,5,6,7,8<br>,34,40 | 2,4,33,35,<br>36,37,38,3<br>9 | 4  | P36374,P49134,Q68G31,Q91XN4                                                                |
| 3809 | 1,3,5,6,7,8<br>,35,36 | 2,4,33,34,<br>37,38,39,4<br>0 | 9  | P01039,P19218,P19223,P47967,P55091,P97840,Q09030,Q5I0D1,Q9JJS8                             |
| 3810 | 1,3,5,6,7,8<br>,35,37 | 2,4,33,34,<br>36,38,39,4<br>0 | 6  | P01039,P19132,P19218,P47967,P55091,P80299                                                  |
| 3811 | 1,3,5,6,7,8<br>,35,38 | 2,4,33,34,<br>36,37,39,4<br>0 | 4  | P19218,P35280,P36374,Q6IG05                                                                |
| 3812 | 1,3,5,6,7,8<br>,35,39 | 2,4,33,34,<br>36,37,38,4<br>0 | 2  | P36374,Q4KLZ6                                                                              |
| 3813 | 1,3,5,6,7,8<br>,35,40 | 2,4,33,34,<br>36,37,38,3<br>9 | 1  | P36374                                                                                     |
| 3814 | 1,3,5,6,7,8<br>,36,37 | 2,4,33,34,<br>35,38,39,4<br>0 | 13 | D3ZUC6,P00774,P01039,P09656,P19218,P47967,P55091,P80299,P97829,P97840,P98089,Q5I0D1,Q62635 |
| 3815 | 1,3,5,6,7,8<br>,36,38 | 2,4,33,34,<br>35,37,39,4<br>0 | 6  | D3ZUC6,P19218,P35280,P47967,P80020,Q6IG05                                                  |
| 3816 | 1,3,5,6,7,8<br>,36,39 | 2,4,33,34,<br>35,37,38,4<br>0 | 6  | B0BNN3,D3ZUC6,P19223,P80020,P97829,Q9R168                                                  |
| 3817 | 1,3,5,6,7,8<br>,36,40 | 2,4,33,34,<br>35,37,38,3<br>9 | 4  | B0BNN3,D3ZUC6,P80020,Q91XN4                                                                |
| 3818 | 1,3,5,6,7,8<br>,37,38 | 2,4,33,34,<br>35,36,39,4<br>0 | 6  | D3ZUC6,P19218,P35280,P49134,Q6IG05,Q9EQS0                                                  |
| 3819 | 1,3,5,6,7,8<br>,37,39 | 2,4,33,34,<br>35,36,38,4<br>0 | 6  | D3ZUC6,P49134,P63029,P80299,P97829,Q9R168                                                  |

|      |                        |                               |                                                                                        |
|------|------------------------|-------------------------------|----------------------------------------------------------------------------------------|
| 3820 | 1,3,5,6,7,8<br>,37,40  | 2,4,33,34,<br>35,36,38,3<br>9 | 6 D3ZUC6,P49134,P80299,P82471,Q62714,Q9QW07                                            |
| 3821 | 1,3,5,6,7,8<br>,38,39  | 2,4,33,34,<br>35,36,37,4<br>0 | 5 D3ZUC6,P35280,P36374,P80020,Q9EQS0                                                   |
| 3822 | 1,3,5,6,7,8<br>,38,40  | 2,4,33,34,<br>35,36,37,3<br>9 | 6 D3ZUC6,P25031,P35280,P36374,P80020,Q6IG05                                            |
| 3823 | 1,3,5,6,7,8<br>,39,40  | 2,4,33,34,<br>35,36,37,3<br>8 | 5 B0BNN3,D3ZUC6,P36374,P80020,Q9R168                                                   |
| 3824 | 1,3,5,6,7,3<br>3,34,35 | 2,4,8,36,3<br>7,38,39,40      | 6 D4A5U3,P08721,Q5BJY9,Q5I0D7,Q62635,Q8CIZ5                                            |
| 3825 | 1,3,5,6,7,3<br>3,34,36 | 2,4,8,35,3<br>7,38,39,40      | 12 D4A5U3,P00774,P08494,P08721,P19223,P47967,P55091,P98089,Q09030,Q5I0D7,Q62635,Q8CIZ5 |
| 3826 | 1,3,5,6,7,3<br>3,34,37 | 2,4,8,35,3<br>6,38,39,40      | 10 P00774,P08721,P47967,P55091,P98089,Q5BJY9,Q62635,Q62714,Q6AY61,Q8CIZ5               |
| 3827 | 1,3,5,6,7,3<br>3,34,38 | 2,4,8,35,3<br>6,37,39,40      | 5 P01946,P02091,P08721,P50116,Q6AY61                                                   |
| 3828 | 1,3,5,6,7,3<br>3,34,39 | 2,4,8,35,3<br>6,37,38,40      | 5 P02651,P08721,Q5RKI1,Q62635,Q9QX79                                                   |
| 3829 | 1,3,5,6,7,3<br>3,34,40 | 2,4,8,35,3<br>6,37,38,39      | 2 Q62714,Q6AY61                                                                        |
| 3830 | 1,3,5,6,7,3<br>3,35,36 | 2,4,8,34,3<br>7,38,39,40      | 11 D4A5U3,P05539,P08721,P19223,P47967,P55091,P97840,Q09030,Q62635,Q63618,Q8CIZ5        |
| 3831 | 1,3,5,6,7,3<br>3,35,37 | 2,4,8,34,3<br>6,38,39,40      | 7 D4A5U3,P05539,P47967,P55091,Q5BJY9,Q62635,Q8CIZ5                                     |
| 3832 | 1,3,5,6,7,3<br>3,35,38 | 2,4,8,34,3<br>6,37,39,40      | 1 P05539                                                                               |
| 3833 | 1,3,5,6,7,3<br>3,35,39 | 2,4,8,34,3<br>6,37,38,40      | 4 P05539,P62804,Q4KLZ6,Q5RKI1                                                          |
| 3834 | 1,3,5,6,7,3<br>3,35,40 | 2,4,8,34,3<br>6,37,38,39      | 1 P05539                                                                               |
| 3835 | 1,3,5,6,7,3<br>3,36,37 | 2,4,8,34,3<br>5,38,39,40      | 12 D4A5U3,P00774,P08721,P09656,P25809,P47967,P55091,P97840,P98089,Q5BJY9,Q62635,Q8CIZ5 |
| 3836 | 1,3,5,6,7,3<br>3,36,38 | 2,4,8,34,3<br>5,37,39,40      | 6 P00774,P01015,P08721,P25809,P47967,Q923V8                                            |
| 3837 | 1,3,5,6,7,3<br>3,36,39 | 2,4,8,34,3<br>5,37,38,40      | 5 P08721,P19223,P25809,Q5RKI1,Q62635                                                   |

|      |                        |                          |    |                                                                       |
|------|------------------------|--------------------------|----|-----------------------------------------------------------------------|
| 3838 | 1,3,5,6,7,3<br>3,36,40 | 2,4,8,34,3<br>5,37,38,39 | 4  | P01681,P05539,P08721,P25809                                           |
| 3839 | 1,3,5,6,7,3<br>3,37,38 | 2,4,8,34,3<br>5,36,39,40 | 2  | Q62714,Q6AY61                                                         |
| 3840 | 1,3,5,6,7,3<br>3,37,39 | 2,4,8,34,3<br>5,36,38,40 | 3  | Q5RKI1,Q62635,Q6AY61                                                  |
| 3841 | 1,3,5,6,7,3<br>3,37,40 | 2,4,8,34,3<br>5,36,38,39 | 5  | P05539,P25809,Q5BJY9,Q62714,Q6AY61                                    |
| 3842 | 1,3,5,6,7,3<br>3,38,39 | 2,4,8,34,3<br>5,36,37,40 | 2  | P02770,Q5RKI1                                                         |
| 3843 | 1,3,5,6,7,3<br>3,38,40 | 2,4,8,34,3<br>5,36,37,39 | 4  | P05539,P25809,P50116,Q62714                                           |
| 3844 | 1,3,5,6,7,3<br>3,39,40 | 2,4,8,34,3<br>5,36,37,38 | 3  | P05539,P25809,Q5RKI1                                                  |
| 3845 | 1,3,5,6,7,3<br>4,35,36 | 2,4,8,33,3<br>7,38,39,40 | 10 | D4A5U3,P19223,P47967,P55091,P97840,Q5I0D7,Q62635,Q68G31,Q8CIZ5,Q9QWN8 |
| 3846 | 1,3,5,6,7,3<br>4,35,37 | 2,4,8,33,3<br>6,38,39,40 | 5  | P47967,P55091,Q5BJY9,Q62635,Q8CIZ5                                    |
| 3847 | 1,3,5,6,7,3<br>4,35,38 | 2,4,8,33,3<br>6,37,39,40 | 3  | P01946,P02091,Q9QWN8                                                  |
| 3848 | 1,3,5,6,7,3<br>4,35,39 | 2,4,8,33,3<br>6,37,38,40 | 0  |                                                                       |
| 3849 | 1,3,5,6,7,3<br>4,35,40 | 2,4,8,33,3<br>6,37,38,39 | 0  |                                                                       |
| 3850 | 1,3,5,6,7,3<br>4,36,37 | 2,4,8,33,3<br>5,38,39,40 | 8  | P00774,P47967,P55091,P97840,P98089,Q5I0D1,Q62635,Q8CIZ5               |
| 3851 | 1,3,5,6,7,3<br>4,36,38 | 2,4,8,33,3<br>5,37,39,40 | 4  | P01946,P02091,P47967,Q9QWN8                                           |
| 3852 | 1,3,5,6,7,3<br>4,36,39 | 2,4,8,33,3<br>5,37,38,40 | 4  | B0BNN3,P19223,Q62635,Q68G31                                           |
| 3853 | 1,3,5,6,7,3<br>4,36,40 | 2,4,8,33,3<br>5,37,38,39 | 2  | Q68G31,Q9QWN8                                                         |
| 3854 | 1,3,5,6,7,3<br>4,37,38 | 2,4,8,33,3<br>5,36,39,40 | 5  | P01835,P01946,P02091,P49134,Q6AY61                                    |
| 3855 | 1,3,5,6,7,3<br>4,37,39 | 2,4,8,33,3<br>5,36,38,40 | 4  | P01835,P49134,Q62635,Q6AY61                                           |
| 3856 | 1,3,5,6,7,3<br>4,37,40 | 2,4,8,33,3<br>5,36,38,39 | 5  | P01835,P20767,P49134,Q62714,Q6AY61                                    |
| 3857 | 1,3,5,6,7,3<br>4,38,39 | 2,4,8,33,3<br>5,36,37,40 | 5  | P01946,P02091,P60905,Q6AY61,Q9QX79                                    |

|      |                        |                          |    |                                                                                    |
|------|------------------------|--------------------------|----|------------------------------------------------------------------------------------|
| 3858 | 1,3,5,6,7,3<br>4,38,40 | 2,4,8,33,3<br>5,36,37,39 | 5  | P01946,P02091,Q62714,Q6AY61,Q9QWN8                                                 |
| 3859 | 1,3,5,6,7,3<br>4,39,40 | 2,4,8,33,3<br>5,36,37,38 | 2  | Q68G31,Q6AY61                                                                      |
| 3860 | 1,3,5,6,7,3<br>5,36,37 | 2,4,8,33,3<br>4,38,39,40 | 12 | D4A5U3,P01039,P09656,P19132,P19218,P47967,P55091,P97840,Q5I0D1,Q62635,Q8CIZ5,Q9JJS |
| 3861 | 1,3,5,6,7,3<br>5,36,38 | 2,4,8,33,3<br>4,37,39,40 | 3  | P19218,P47967,Q9QWN8                                                               |
| 3862 | 1,3,5,6,7,3<br>5,36,39 | 2,4,8,33,3<br>4,37,38,40 | 4  | B0BNN3,P19223,Q5PQL7,Q9QWN8                                                        |
| 3863 | 1,3,5,6,7,3<br>5,36,40 | 2,4,8,33,3<br>4,37,38,39 | 5  | D4A5U3,P19132,P25809,P53792,Q9QWN8                                                 |
| 3864 | 1,3,5,6,7,3<br>5,37,38 | 2,4,8,33,3<br>4,36,39,40 | 1  | P19218                                                                             |
| 3865 | 1,3,5,6,7,3<br>5,37,39 | 2,4,8,33,3<br>4,36,38,40 | 1  | P00762                                                                             |
| 3866 | 1,3,5,6,7,3<br>5,37,40 | 2,4,8,33,3<br>4,36,38,39 | 2  | P19132,P82471                                                                      |
| 3867 | 1,3,5,6,7,3<br>5,38,39 | 2,4,8,33,3<br>4,36,37,40 | 3  | O55004,P24368,P30120                                                               |
| 3868 | 1,3,5,6,7,3<br>5,38,40 | 2,4,8,33,3<br>4,36,37,39 | 5  | O55004,P36374,Q62812,Q6P6R2,Q9QWN8                                                 |
| 3869 | 1,3,5,6,7,3<br>5,39,40 | 2,4,8,33,3<br>4,36,37,38 | 1  | O55004                                                                             |
| 3870 | 1,3,5,6,7,3<br>6,37,38 | 2,4,8,33,3<br>4,35,39,40 | 6  | P00774,P01835,P09656,P19218,P47967,P97840                                          |
| 3871 | 1,3,5,6,7,3<br>6,37,39 | 2,4,8,33,3<br>4,35,38,40 | 5  | P00762,P09656,P25809,P97829,Q62635                                                 |
| 3872 | 1,3,5,6,7,3<br>6,37,40 | 2,4,8,33,3<br>4,35,38,39 | 4  | P01835,P19132,P25809,P47967                                                        |
| 3873 | 1,3,5,6,7,3<br>6,38,39 | 2,4,8,33,3<br>4,35,37,40 | 2  | P80020,Q9QWN8                                                                      |
| 3874 | 1,3,5,6,7,3<br>6,38,40 | 2,4,8,33,3<br>4,35,37,39 | 3  | P25809,P80020,Q9QWN8                                                               |
| 3875 | 1,3,5,6,7,3<br>6,39,40 | 2,4,8,33,3<br>4,35,37,38 | 3  | B0BNN3,P25809,P80020                                                               |
| 3876 | 1,3,5,6,7,3<br>7,38,39 | 2,4,8,33,3<br>4,35,36,40 | 3  | D3ZUC6,P01835,Q6AY61                                                               |
| 3877 | 1,3,5,6,7,3<br>7,38,40 | 2,4,8,33,3<br>4,35,36,39 | 6  | D3ZUC6,P01835,P20767,P25809,Q62714,Q6AY61                                          |

|      |                        |                          |    |                                                                                     |
|------|------------------------|--------------------------|----|-------------------------------------------------------------------------------------|
| 3878 | 1,3,5,6,7,3<br>7,39,40 | 2,4,8,33,3<br>4,35,36,38 | 6  | D3ZUC6,P00762,P01835,P25809,P49134,Q6AY61                                           |
| 3879 | 1,3,5,6,7,3<br>8,39,40 | 2,4,8,33,3<br>4,35,36,37 | 5  | D3ZUC6,O55004,P25809,P51740,P80020                                                  |
| 3880 | 1,3,5,6,8,3<br>3,34,35 | 2,4,7,36,3<br>7,38,39,40 | 2  | O89117,Q09030                                                                       |
| 3881 | 1,3,5,6,8,3<br>3,34,36 | 2,4,7,35,3<br>7,38,39,40 | 12 | P00774,P01681,P08494,P08649,P08721,P19223,P55091,P98089,Q09030,Q5I0D7,Q62635,Q91XN4 |
| 3882 | 1,3,5,6,8,3<br>3,34,37 | 2,4,7,35,3<br>6,38,39,40 | 4  | P55091,P98089,Q62635,Q6IG05                                                         |
| 3883 | 1,3,5,6,8,3<br>3,34,38 | 2,4,7,35,3<br>6,37,39,40 | 4  | P01946,P02091,Q6IFU7,Q6IG05                                                         |
| 3884 | 1,3,5,6,8,3<br>3,34,39 | 2,4,7,35,3<br>6,37,38,40 | 2  | P02651,P02793,Q7TP54                                                                |
| 3885 | 1,3,5,6,8,3<br>3,34,40 | 2,4,7,35,3<br>6,37,38,39 | 1  | P25031                                                                              |
| 3886 | 1,3,5,6,8,3<br>3,35,36 | 2,4,7,34,3<br>7,38,39,40 | 6  | P01681,P19223,P55091,P62804,Q09030,Q63618                                           |
| 3887 | 1,3,5,6,8,3<br>3,35,37 | 2,4,7,34,3<br>6,38,39,40 | 3  | P55091,P80299,Q80WL1                                                                |
| 3888 | 1,3,5,6,8,3<br>3,35,38 | 2,4,7,34,3<br>6,37,39,40 | 1  | Q6IG05                                                                              |
| 3889 | 1,3,5,6,8,3<br>3,35,39 | 2,4,7,34,3<br>6,37,38,40 | 3  | P62804,Q4KLZ6,Q80WL1                                                                |
| 3890 | 1,3,5,6,8,3<br>3,35,40 | 2,4,7,34,3<br>6,37,38,39 | 3  | P01681,P62804,Q80WL1                                                                |
| 3891 | 1,3,5,6,8,3<br>3,36,37 | 2,4,7,34,3<br>5,38,39,40 | 6  | P00774,P09656,P55091,P98089,Q09030,Q62635                                           |
| 3892 | 1,3,5,6,8,3<br>3,36,38 | 2,4,7,34,3<br>5,37,39,40 | 3  | P01681,Q09030,Q6IG05                                                                |
| 3893 | 1,3,5,6,8,3<br>3,36,39 | 2,4,7,34,3<br>5,37,38,40 | 5  | P00714,P01681,P19223,Q09030,Q9R168                                                  |
| 3894 | 1,3,5,6,8,3<br>3,36,40 | 2,4,7,34,3<br>5,37,38,39 | 2  | P01681,Q09030                                                                       |
| 3895 | 1,3,5,6,8,3<br>3,37,38 | 2,4,7,34,3<br>5,36,39,40 | 2  | Q6IG05,Q80WL1                                                                       |
| 3896 | 1,3,5,6,8,3<br>3,37,39 | 2,4,7,34,3<br>5,36,38,40 | 3  | P80299,Q80WL1,Q9R168                                                                |
| 3897 | 1,3,5,6,8,3<br>3,37,40 | 2,4,7,34,3<br>5,36,38,39 | 5  | P80299,P82471,Q62714,Q80WL1,Q9QW07                                                  |



|      |                        |                          |   |                                                                |
|------|------------------------|--------------------------|---|----------------------------------------------------------------|
| 3898 | 1,3,5,6,8,3<br>3,38,39 | 2,4,7,34,3<br>5,36,37,40 | 4 | P19132,Q6IFU7,Q6IG05,Q80WL1                                    |
| 3899 | 1,3,5,6,8,3<br>3,38,40 | 2,4,7,34,3<br>5,36,37,39 | 5 | P25031,Q62714,Q6IFU7,Q6IG05,Q80WL1                             |
| 3900 | 1,3,5,6,8,3<br>3,39,40 | 2,4,7,34,3<br>5,36,37,38 | 3 | P25031,Q80WL1,Q9R168                                           |
| 3901 | 1,3,5,6,8,3<br>4,35,36 | 2,4,7,33,3<br>7,38,39,40 | 3 | P01039,P19223,P55091                                           |
| 3902 | 1,3,5,6,8,3<br>4,35,37 | 2,4,7,33,3<br>6,38,39,40 | 2 | P01039,P55091                                                  |
| 3903 | 1,3,5,6,8,3<br>4,35,38 | 2,4,7,33,3<br>6,37,39,40 | 3 | P01946,P02091,Q6IG05                                           |
| 3904 | 1,3,5,6,8,3<br>4,35,39 | 2,4,7,33,3<br>6,37,38,40 | 0 |                                                                |
| 3905 | 1,3,5,6,8,3<br>4,35,40 | 2,4,7,33,3<br>6,37,38,39 | 1 | P15399                                                         |
| 3906 | 1,3,5,6,8,3<br>4,36,37 | 2,4,7,33,3<br>5,38,39,40 | 5 | P00774,P01039,P55091,P98089,Q62635                             |
| 3907 | 1,3,5,6,8,3<br>4,36,38 | 2,4,7,33,3<br>5,37,39,40 | 3 | P01946,P02091,Q6IG05                                           |
| 3908 | 1,3,5,6,8,3<br>4,36,39 | 2,4,7,33,3<br>5,37,38,40 | 3 | P00714,P19223,Q9R168                                           |
| 3909 | 1,3,5,6,8,3<br>4,36,40 | 2,4,7,33,3<br>5,37,38,39 | 0 |                                                                |
| 3910 | 1,3,5,6,8,3<br>4,37,38 | 2,4,7,33,3<br>5,36,39,40 | 5 | P01946,P02091,P49134,Q6IFW6,Q6IG05                             |
| 3911 | 1,3,5,6,8,3<br>4,37,39 | 2,4,7,33,3<br>5,36,38,40 | 2 | P49134,Q9R168                                                  |
| 3912 | 1,3,5,6,8,3<br>4,37,40 | 2,4,7,33,3<br>5,36,38,39 | 3 | P13432,P49134,Q9QW07                                           |
| 3913 | 1,3,5,6,8,3<br>4,38,39 | 2,4,7,33,3<br>5,36,37,40 | 3 | P01946,P02091,Q6IG05                                           |
| 3914 | 1,3,5,6,8,3<br>4,38,40 | 2,4,7,33,3<br>5,36,37,39 | 7 | P01946,P02091,P15399,P25031,P49134,P97580,Q6IG05               |
| 3915 | 1,3,5,6,8,3<br>4,39,40 | 2,4,7,33,3<br>5,36,37,38 | 4 | P15399,P49134,P97580,Q9R168                                    |
| 3916 | 1,3,5,6,8,3<br>5,36,37 | 2,4,7,33,3<br>4,38,39,40 | 9 | F1M3L7,P01039,P09656,P19218,P55091,P80299,P82471,P97829,Q64093 |
| 3917 | 1,3,5,6,8,3<br>5,36,38 | 2,4,7,33,3<br>4,37,39,40 | 2 | P19218,Q6AYQ8                                                  |

|      |                         |                          |                                                                                                      |
|------|-------------------------|--------------------------|------------------------------------------------------------------------------------------------------|
| 3918 | 1,3,5,6,8,3<br>5,36,39  | 2,4,7,33,3<br>4,37,38,40 | 5 B0BNN3,P19223,P23739,P80299,Q9R168                                                                 |
| 3919 | 1,3,5,6,8,3<br>5,36,40  | 2,4,7,33,3<br>4,37,38,39 | 2 P80299,P82471                                                                                      |
| 3920 | 1,3,5,6,8,3<br>5,37,38  | 2,4,7,33,3<br>4,36,39,40 | 4 P07379,P19218,P80299,Q6IG05                                                                        |
| 3921 | 1,3,5,6,8,3<br>5,37,39  | 2,4,7,33,3<br>4,36,38,40 | 3 P80299,P82471,Q9R168                                                                               |
| 3922 | 1,3,5,6,8,3<br>5,37,40  | 2,4,7,33,3<br>4,36,38,39 | 3 P80299,P82471,Q64093                                                                               |
| 3923 | 1,3,5,6,8,3<br>5,38,39  | 2,4,7,33,3<br>4,36,37,40 | 1 Q9R168                                                                                             |
| 3924 | 1,3,5,6,8,3<br>5,38,40  | 2,4,7,33,3<br>4,36,37,39 | 2 P25031,P82471                                                                                      |
| 3925 | 1,3,5,6,8,3<br>5,39,40  | 2,4,7,33,3<br>4,36,37,38 | 4 P54921,P80299,P82471,Q9R168                                                                        |
| 3926 | 1,3,5,6,8,3<br>6,37,38  | 2,4,7,33,3<br>4,35,39,40 | 4 P09656,P19218,P80299,Q6IG05                                                                        |
| 3927 | 1,3,5,6,8,3<br>6,37,39  | 2,4,7,33,3<br>4,35,38,40 | 5 D3ZUC6,P09656,P80299,P97829,Q9R168                                                                 |
| 3928 | 1,3,5,6,8,3<br>6,37,40  | 2,4,7,33,3<br>4,35,38,39 | 4 D3ZUC6,P80299,P82471,P97829                                                                        |
| 3929 | 1,3,5,6,8,3<br>6,38,39  | 2,4,7,33,3<br>4,35,37,40 | 2 P80020,Q9R168                                                                                      |
| 3930 | 1,3,5,6,8,3<br>6,38,40  | 2,4,7,33,3<br>4,35,37,39 | 2 P25031,P80020                                                                                      |
| 3931 | 1,3,5,6,8,3<br>6,39,40  | 2,4,7,33,3<br>4,35,37,38 | 8 B0BNN3,D3ZUC6,P54921,P80020,P80299,P82471,P97829,Q9R168                                            |
| 3932 | 1,3,5,6,8,3<br>7,38,39  | 2,4,7,33,3<br>4,35,36,40 | 3 D3ZUC6,P80299,Q9R168                                                                               |
| 3933 | 1,3,5,6,8,3<br>7,38,40  | 2,4,7,33,3<br>4,35,36,39 | 6 D3ZUC6,P49134,P80299,P82471,Q62714,Q6IG05                                                          |
| 3934 | 1,3,5,6,8,3<br>7,39,40  | 2,4,7,33,3<br>4,35,36,38 | 5 D3ZUC6,P49134,P80299,P82471,Q9R168                                                                 |
| 3935 | 1,3,5,6,8,3<br>8,39,40  | 2,4,7,33,3<br>4,35,36,37 | 6 D3ZUC6,P25031,P51740,P54921,P80020,Q9R168                                                          |
| 3936 | 1,3,5,6,33,<br>34,35,36 | 2,4,7,8,37,<br>38,39,40  | 14 D4A5U3,O89117,P08494,P08721,P11883,P19223,P55091,P98089,Q5I0D7,Q5QE79,Q62635,Q63618,Q6PCU2,Q8CIZ5 |
| 3937 | 1,3,5,6,33,<br>34,35,37 | 2,4,7,8,36,<br>38,39,40  | 6 D4A5U3,P55091,P98089,Q5BJY9,Q62635,Q8CIZ5                                                          |

|      |                                              |                                                                                                      |
|------|----------------------------------------------|------------------------------------------------------------------------------------------------------|
| 3938 | 1,3,5,6,33, 2,4,7,8,36,<br>34,35,38 37,39,40 | 3 P01946,P02091,Q812E4                                                                               |
| 3939 | 1,3,5,6,33, 2,4,7,8,36,<br>34,35,39 37,38,40 | 1 P62804                                                                                             |
| 3940 | 1,3,5,6,33, 2,4,7,8,36,<br>34,35,40 37,38,39 | 0                                                                                                    |
| 3941 | 1,3,5,6,33, 2,4,7,8,35,<br>34,36,37 38,39,40 | 10 D4A5U3,P00774,P08721,P11883,P55091,P97584,P98089,Q05695,Q62635,Q8CIZ5                             |
| 3942 | 1,3,5,6,33, 2,4,7,8,35,<br>34,36,38 37,39,40 | 4 P00774,P01946,P02091,P08721                                                                        |
| 3943 | 1,3,5,6,33, 2,4,7,8,35,<br>34,36,39 37,38,40 | 5 P08494,P19223,P98089,Q62635,Q99041                                                                 |
| 3944 | 1,3,5,6,33, 2,4,7,8,35,<br>34,36,40 37,38,39 | 3 P08494,P11883,P98089                                                                               |
| 3945 | 1,3,5,6,33, 2,4,7,8,35,<br>34,37,38 36,39,40 | 4 P01946,P02091,Q62714,Q6AY61                                                                        |
| 3946 | 1,3,5,6,33, 2,4,7,8,35,<br>34,37,39 36,38,40 | 3 P02793;Q7TP54,P98089,Q62635                                                                        |
| 3947 | 1,3,5,6,33, 2,4,7,8,35,<br>34,37,40 36,38,39 | 1 Q62714                                                                                             |
| 3948 | 1,3,5,6,33, 2,4,7,8,35,<br>34,38,39 36,37,40 | 4 P01946,P02091,P02793;Q7TP54,P19132                                                                 |
| 3949 | 1,3,5,6,33, 2,4,7,8,35,<br>34,38,40 36,37,39 | 3 P01946,P02091,Q62714                                                                               |
| 3950 | 1,3,5,6,33, 2,4,7,8,35,<br>34,39,40 36,37,38 | 0                                                                                                    |
| 3951 | 1,3,5,6,33, 2,4,7,8,34,<br>35,36,37 38,39,40 | 14 D4A5U3,F1M3L7,P09656,P11883,P20762,P55091,P62804,P98089,Q4G075,Q5BJY9,Q62635,Q63618,Q8CIZ5,Q9Z0V6 |
| 3952 | 1,3,5,6,33, 2,4,7,8,34,<br>35,36,38 37,39,40 | 5 D4A5U3,P20762,P62804,Q923V8,Q9Z0V6                                                                 |
| 3953 | 1,3,5,6,33, 2,4,7,8,34,<br>35,36,39 37,38,40 | 2 P23739,P62804                                                                                      |
| 3954 | 1,3,5,6,33, 2,4,7,8,34,<br>35,36,40 37,38,39 | 8 D4A5U3,P01681,P20762,P25809,P53792,P62804,Q63618,Q9Z0V6                                            |
| 3955 | 1,3,5,6,33, 2,4,7,8,34,<br>35,37,38 36,39,40 | 2 P20762,Q9Z0V6                                                                                      |
| 3956 | 1,3,5,6,33, 2,4,7,8,34,<br>35,37,39 36,38,40 | 1 P62804                                                                                             |
| 3957 | 1,3,5,6,33, 2,4,7,8,34,<br>35,37,40 36,38,39 | 5 D4A5U3,P20762,P62804,Q4G075,Q9Z0V6                                                                 |

|      |                                              |                                                                  |
|------|----------------------------------------------|------------------------------------------------------------------|
| 3958 | 1,3,5,6,33, 2,4,7,8,34,<br>35,38,39 36,37,40 | 1 P62804                                                         |
| 3959 | 1,3,5,6,33, 2,4,7,8,34,<br>35,38,40 36,37,39 | 5 P20762,P62804,Q6P6R2,Q9Z0V6,Q9Z1F2                             |
| 3960 | 1,3,5,6,33, 2,4,7,8,34,<br>35,39,40 36,37,38 | 2 P62804,Q00715                                                  |
| 3961 | 1,3,5,6,33, 2,4,7,8,34,<br>36,37,38 35,39,40 | 4 P00774,P09656,P20762,Q9Z0V6                                    |
| 3962 | 1,3,5,6,33, 2,4,7,8,34,<br>36,37,39 35,38,40 | 5 P00774,P09656,P25809,P98089,Q62635                             |
| 3963 | 1,3,5,6,33, 2,4,7,8,34,<br>36,37,40 35,38,39 | 9 D4A5U3,P09656,P11883,P20762,P25809,P98089,Q4G075,Q9WTT6,Q9Z0V6 |
| 3964 | 1,3,5,6,33, 2,4,7,8,34,<br>36,38,39 35,37,40 | 2 P62804,Q923V8                                                  |
| 3965 | 1,3,5,6,33, 2,4,7,8,34,<br>36,38,40 35,37,39 | 3 P20762,P25809,Q9Z0V6                                           |
| 3966 | 1,3,5,6,33, 2,4,7,8,34,<br>36,39,40 35,37,38 | 3 P01681,P25809,P62804                                           |
| 3967 | 1,3,5,6,33, 2,4,7,8,34,<br>37,38,39 35,36,40 | 0                                                                |
| 3968 | 1,3,5,6,33, 2,4,7,8,34,<br>37,38,40 35,36,39 | 5 P20762,P25809,Q62714,Q9Z0V6,Q9Z1F2                             |
| 3969 | 1,3,5,6,33, 2,4,7,8,34,<br>37,39,40 35,36,38 | 1 P25809                                                         |
| 3970 | 1,3,5,6,33, 2,4,7,8,34,<br>38,39,40 35,36,37 | 3 P25809,P51740,P62804                                           |
| 3971 | 1,3,5,6,34, 2,4,7,8,33,<br>35,36,37 38,39,40 | 9 D4A5U3,P01039,P11883,P39069,P47967,P55091,P98089,Q62635,Q8CIZ5 |
| 3972 | 1,3,5,6,34, 2,4,7,8,33,<br>35,36,38 37,39,40 | 3 P01946,P02091,Q9QWN8                                           |
| 3973 | 1,3,5,6,34, 2,4,7,8,33,<br>35,36,39 37,38,40 | 2 P19223,P23739                                                  |
| 3974 | 1,3,5,6,34, 2,4,7,8,33,<br>35,36,40 37,38,39 | 2 D4A5U3,P53792                                                  |
| 3975 | 1,3,5,6,34, 2,4,7,8,33,<br>35,37,38 36,39,40 | 2 P01946,P02091                                                  |
| 3976 | 1,3,5,6,34, 2,4,7,8,33,<br>35,37,39 36,38,40 | 0                                                                |
| 3977 | 1,3,5,6,34, 2,4,7,8,33,<br>35,37,40 36,38,39 | 1 Q4G075                                                         |

|      |                                              |                                                                          |
|------|----------------------------------------------|--------------------------------------------------------------------------|
| 3978 | 1,3,5,6,34, 2,4,7,8,33,<br>35,38,39 36,37,40 | 4 P01946,P02091,P08723,P30120                                            |
| 3979 | 1,3,5,6,34, 2,4,7,8,33,<br>35,38,40 36,37,39 | 2 P01946,P02091                                                          |
| 3980 | 1,3,5,6,34, 2,4,7,8,33,<br>35,39,40 36,37,38 | 1 P08723                                                                 |
| 3981 | 1,3,5,6,34, 2,4,7,8,33,<br>36,37,38 35,39,40 | 3 P00774,P01946,P02091                                                   |
| 3982 | 1,3,5,6,34, 2,4,7,8,33,<br>36,37,39 35,38,40 | 2 P98089,Q62635                                                          |
| 3983 | 1,3,5,6,34, 2,4,7,8,33,<br>36,37,40 35,38,39 | 3 P11883,P98089,Q4G075                                                   |
| 3984 | 1,3,5,6,34, 2,4,7,8,33,<br>36,38,39 35,37,40 | 2 P01946,P02091                                                          |
| 3985 | 1,3,5,6,34, 2,4,7,8,33,<br>36,38,40 35,37,39 | 2 P01946,P02091                                                          |
| 3986 | 1,3,5,6,34, 2,4,7,8,33,<br>36,39,40 35,37,38 | 0                                                                        |
| 3987 | 1,3,5,6,34, 2,4,7,8,33,<br>37,38,39 35,36,40 | 3 P01946,P02091,Q6AY61                                                   |
| 3988 | 1,3,5,6,34, 2,4,7,8,33,<br>37,38,40 35,36,39 | 6 P01946,P02091,P20767,P49134,Q62714,Q6AY61                              |
| 3989 | 1,3,5,6,34, 2,4,7,8,33,<br>37,39,40 35,36,38 | 1 P49134                                                                 |
| 3990 | 1,3,5,6,34, 2,4,7,8,33,<br>38,39,40 35,36,37 | 4 P01946,P02091,P08723,P51740                                            |
| 3991 | 1,3,5,6,35, 2,4,7,8,33,<br>36,37,38 34,39,40 | 4 P09656,P19218,P20762,Q9Z0V6                                            |
| 3992 | 1,3,5,6,35, 2,4,7,8,33,<br>36,37,39 34,38,40 | 2 P09656,P80299                                                          |
| 3993 | 1,3,5,6,35, 2,4,7,8,33,<br>36,37,40 34,38,39 | 10 D4A5U3,P09656,P19132,P20762,P53792,P80299,P82471,Q4G075,Q64093,Q9Z0V6 |
| 3994 | 1,3,5,6,35, 2,4,7,8,33,<br>36,38,39 34,37,40 | 4 O55004,P24368,P30120,P62804                                            |
| 3995 | 1,3,5,6,35, 2,4,7,8,33,<br>36,38,40 34,37,39 | 5 P20762,P53792,Q6AYQ8,Q9QWN8,Q9Z0V6                                     |
| 3996 | 1,3,5,6,35, 2,4,7,8,33,<br>36,39,40 34,37,38 | 3 O55004,P62804,P80299                                                   |
| 3997 | 1,3,5,6,35, 2,4,7,8,33,<br>37,38,39 34,36,40 | 1 O55004                                                                 |

|      |                                              |    |                                                                                     |
|------|----------------------------------------------|----|-------------------------------------------------------------------------------------|
| 3998 | 1,3,5,6,35, 2,4,7,8,33,<br>37,38,40 34,36,39 | 7  | O55004,P20646,P20762,P82471,Q9QX74,Q9Z0V6,Q9Z1F2                                    |
| 3999 | 1,3,5,6,35, 2,4,7,8,33,<br>37,39,40 34,36,38 | 4  | O55004,P80299,P82471,Q9QX74                                                         |
| 4000 | 1,3,5,6,35, 2,4,7,8,33,<br>38,39,40 34,36,37 | 8  | O55004,P08723,P0C0A9,P51740,P62804,Q00715,Q6P6R2,Q9QX74                             |
| 4001 | 1,3,5,6,36, 2,4,7,8,33,<br>37,38,39 34,35,40 | 1  | P09656                                                                              |
| 4002 | 1,3,5,6,36, 2,4,7,8,33,<br>37,38,40 34,35,39 | 6  | P09656,P20762,P25809,P82471,Q9QX74,Q9Z0V6                                           |
| 4003 | 1,3,5,6,36, 2,4,7,8,33,<br>37,39,40 34,35,38 | 3  | P25809,P80299,P82471                                                                |
| 4004 | 1,3,5,6,36, 2,4,7,8,33,<br>38,39,40 34,35,37 | 5  | O55004,P25809,P51740,P80020,Q9QX74                                                  |
| 4005 | 1,3,5,6,37, 2,4,7,8,33,<br>38,39,40 34,35,36 | 6  | D3ZUC6,O55004,P25809,P51740,P82471,Q9QX74                                           |
| 4006 | 1,3,5,7,8,3 2,4,6,36,3<br>3,34,35 7,38,39,40 | 4  | P08721,P51740,Q05511,Q9QX74                                                         |
| 4007 | 1,3,5,7,8,3 2,4,6,35,3<br>3,34,36 7,38,39,40 | 12 | B1H234,P00774,P01681,P08721,P19223,P47967,P51740,P55091,P98089,Q05511,Q62635,Q9QX74 |
| 4008 | 1,3,5,7,8,3 2,4,6,35,3<br>3,34,37 6,38,39,40 | 7  | P06760,P47967,P51740,P55091,P98089,Q62635,Q9QX74                                    |
| 4009 | 1,3,5,7,8,3 2,4,6,35,3<br>3,34,38 6,37,39,40 | 7  | B1H234,P01946,P02091,P35280,Q05511,Q6IG05,Q9EQS0                                    |
| 4010 | 1,3,5,7,8,3 2,4,6,35,3<br>3,34,39 6,37,38,40 | 5  | P02651,P02793;Q7TP54,Q5RKI1,Q9QX74,Q9Z0V6                                           |
| 4011 | 1,3,5,7,8,3 2,4,6,35,3<br>3,34,40 6,37,38,39 | 0  |                                                                                     |
| 4012 | 1,3,5,7,8,3 2,4,6,34,3<br>3,35,36 7,38,39,40 | 7  | P01681,P08721,P47967,P51740,P55091,P97840,Q4KLZ6                                    |
| 4013 | 1,3,5,7,8,3 2,4,6,34,3<br>3,35,37 6,38,39,40 | 5  | P47967,P51740,P55091,Q4KLZ6,Q80WL1                                                  |
| 4014 | 1,3,5,7,8,3 2,4,6,34,3<br>3,35,38 6,37,39,40 | 2  | P35280,Q6IG05                                                                       |
| 4015 | 1,3,5,7,8,3 2,4,6,34,3<br>3,35,39 6,37,38,40 | 3  | Q4KLZ6,Q5RKI1,Q80WL1                                                                |
| 4016 | 1,3,5,7,8,3 2,4,6,34,3<br>3,35,40 6,37,38,39 | 3  | P01681,Q4KLZ6,Q80WL1                                                                |
| 4017 | 1,3,5,7,8,3 2,4,6,34,3<br>3,36,37 5,38,39,40 | 8  | P00774,P01681,P47967,P51740,P55091,P97840,P98089,Q62635                             |

|      |                        |                          |    |                                                                                     |
|------|------------------------|--------------------------|----|-------------------------------------------------------------------------------------|
| 4018 | 1,3,5,7,8,3<br>3,36,38 | 2,4,6,34,3<br>5,37,39,40 | 4  | P01681,P35280,P47967,Q6IG05                                                         |
| 4019 | 1,3,5,7,8,3<br>3,36,39 | 2,4,6,34,3<br>5,37,38,40 | 4  | P00714,P01681,Q4KLZ6,Q5RKI1                                                         |
| 4020 | 1,3,5,7,8,3<br>3,36,40 | 2,4,6,34,3<br>5,37,38,39 | 1  | P01681                                                                              |
| 4021 | 1,3,5,7,8,3<br>3,37,38 | 2,4,6,34,3<br>5,36,39,40 | 5  | P35280,Q6IFW6,Q6IG05,Q80WL1,Q9EQS0                                                  |
| 4022 | 1,3,5,7,8,3<br>3,37,39 | 2,4,6,34,3<br>5,36,38,40 | 4  | Q4KLZ6,Q5RKI1,Q6AYQ8,Q80WL1                                                         |
| 4023 | 1,3,5,7,8,3<br>3,37,40 | 2,4,6,34,3<br>5,36,38,39 | 2  | Q62714,Q80WL1                                                                       |
| 4024 | 1,3,5,7,8,3<br>3,38,39 | 2,4,6,34,3<br>5,36,37,40 | 7  | P02770,P07174,P19132,P35280,Q5RKI1,Q80WL1,Q9EQS0                                    |
| 4025 | 1,3,5,7,8,3<br>3,38,40 | 2,4,6,34,3<br>5,36,37,39 | 4  | P01681,P35280,Q6IG05,Q80WL1                                                         |
| 4026 | 1,3,5,7,8,3<br>3,39,40 | 2,4,6,34,3<br>5,36,37,38 | 4  | P01681,Q4KLZ6,Q5RKI1,Q80WL1                                                         |
| 4027 | 1,3,5,7,8,3<br>4,35,36 | 2,4,6,33,3<br>7,38,39,40 | 8  | P01039,P19223,P47967,P51740,P55091,P97840,Q05511,Q68G31                             |
| 4028 | 1,3,5,7,8,3<br>4,35,37 | 2,4,6,33,3<br>6,38,39,40 | 6  | P01039,P06760,P36860,P47967,P51740,P55091                                           |
| 4029 | 1,3,5,7,8,3<br>4,35,38 | 2,4,6,33,3<br>6,37,39,40 | 5  | P01946,P02091,P35280,Q05511,Q6IG05                                                  |
| 4030 | 1,3,5,7,8,3<br>4,35,39 | 2,4,6,33,3<br>6,37,38,40 | 4  | P01039,P36860,Q9Z0V6,Q9Z1F2                                                         |
| 4031 | 1,3,5,7,8,3<br>4,35,40 | 2,4,6,33,3<br>6,37,38,39 | 1  | Q68G31                                                                              |
| 4032 | 1,3,5,7,8,3<br>4,36,37 | 2,4,6,33,3<br>5,38,39,40 | 12 | P00774,P01039,P06760,P47967,P49134,P51740,P55091,P97840,P98089,Q5I0D1,Q62635,Q68G31 |
| 4033 | 1,3,5,7,8,3<br>4,36,38 | 2,4,6,33,3<br>5,37,39,40 | 6  | B1H234,P01946,P02091,P35280,P47967,Q6IG05                                           |
| 4034 | 1,3,5,7,8,3<br>4,36,39 | 2,4,6,33,3<br>5,37,38,40 | 5  | P00714,P01039,P19223,Q68G31,Q9Z1F2                                                  |
| 4035 | 1,3,5,7,8,3<br>4,36,40 | 2,4,6,33,3<br>5,37,38,39 | 1  | Q68G31                                                                              |
| 4036 | 1,3,5,7,8,3<br>4,37,38 | 2,4,6,33,3<br>5,36,39,40 | 10 | P01946,P02091,P06760,P35280,P47967,P49134,Q6IFW6,Q6IG05,Q6IMF3,Q9EQS0               |
| 4037 | 1,3,5,7,8,3<br>4,37,39 | 2,4,6,33,3<br>5,36,38,40 | 6  | P01039,P06760,P49134,P63029,Q6IFW6,Q9Z0V6                                           |

|      |                        |                          |    |                                                                       |
|------|------------------------|--------------------------|----|-----------------------------------------------------------------------|
| 4038 | 1,3,5,7,8,3<br>4,37,40 | 2,4,6,33,3<br>5,36,38,39 | 2  | P49134,Q811M5                                                         |
| 4039 | 1,3,5,7,8,3<br>4,38,39 | 2,4,6,33,3<br>5,36,37,40 | 7  | P01946,P02091,P02770,P35280,Q6IFW6,Q9EQS0,Q9Z0V6                      |
| 4040 | 1,3,5,7,8,3<br>4,38,40 | 2,4,6,33,3<br>5,36,37,39 | 5  | P01946,P02091,P35280,P49134,Q6IG05                                    |
| 4041 | 1,3,5,7,8,3<br>4,39,40 | 2,4,6,33,3<br>5,36,37,38 | 3  | P49134,Q68G31,Q9Z0V6                                                  |
| 4042 | 1,3,5,7,8,3<br>5,36,37 | 2,4,6,33,3<br>4,38,39,40 | 10 | F1M3L7,P01039,P19218,P47967,P51740,P55091,P80299,P97829,P97840,Q5I0D1 |
| 4043 | 1,3,5,7,8,3<br>5,36,38 | 2,4,6,33,3<br>4,37,39,40 | 4  | P19218,P35280,P47967,P97840                                           |
| 4044 | 1,3,5,7,8,3<br>5,36,39 | 2,4,6,33,3<br>4,37,38,40 | 4  | P01039,P23739,P97829,Q4KLZ6                                           |
| 4045 | 1,3,5,7,8,3<br>5,36,40 | 2,4,6,33,3<br>4,37,38,39 | 0  |                                                                       |
| 4046 | 1,3,5,7,8,3<br>5,37,38 | 2,4,6,33,3<br>4,36,39,40 | 7  | D3ZUC6,P01039,P07379,P08649,P19218,P35280,Q6IG05                      |
| 4047 | 1,3,5,7,8,3<br>5,37,39 | 2,4,6,33,3<br>4,36,38,40 | 5  | D3ZUC6,P01039,P63029,P80299,Q4KLZ6                                    |
| 4048 | 1,3,5,7,8,3<br>5,37,40 | 2,4,6,33,3<br>4,36,38,39 | 3  | D3ZUC6,P08649,P80299                                                  |
| 4049 | 1,3,5,7,8,3<br>5,38,39 | 2,4,6,33,3<br>4,36,37,40 | 4  | D3ZUC6,O55145,P11883,P35280                                           |
| 4050 | 1,3,5,7,8,3<br>5,38,40 | 2,4,6,33,3<br>4,36,37,39 | 3  | D3ZUC6,P08649,P35280                                                  |
| 4051 | 1,3,5,7,8,3<br>5,39,40 | 2,4,6,33,3<br>4,36,37,38 | 4  | D3ZUC6,O55145,P80299,Q4KLZ6                                           |
| 4052 | 1,3,5,7,8,3<br>6,37,38 | 2,4,6,33,3<br>4,35,39,40 | 8  | D3ZUC6,P01039,P19218,P35280,P47967,P97840,Q6IG05,Q9EQS0               |
| 4053 | 1,3,5,7,8,3<br>6,37,39 | 2,4,6,33,3<br>4,35,38,40 | 5  | D3ZUC6,P01039,P63029,P80299,P97829                                    |
| 4054 | 1,3,5,7,8,3<br>6,37,40 | 2,4,6,33,3<br>4,35,38,39 | 6  | D3ZUC6,P47967,P49134,P80299,P97829,Q811M5                             |
| 4055 | 1,3,5,7,8,3<br>6,38,39 | 2,4,6,33,3<br>4,35,37,40 | 4  | D3ZUC6,P35280,P80020,Q9EQS0                                           |
| 4056 | 1,3,5,7,8,3<br>6,38,40 | 2,4,6,33,3<br>4,35,37,39 | 3  | D3ZUC6,P35280,P80020                                                  |
| 4057 | 1,3,5,7,8,3<br>6,39,40 | 2,4,6,33,3<br>4,35,37,38 | 4  | D3ZUC6,P80020,P80299,P97829                                           |



|      |                         |                          |    |                                                                                            |
|------|-------------------------|--------------------------|----|--------------------------------------------------------------------------------------------|
| 4058 | 1,3,5,7,8,3<br>7,38,39  | 2,4,6,33,3<br>4,35,36,40 | 5  | D3ZUC6,P02770,P35280,Q6IFW6,Q9EQS0                                                         |
| 4059 | 1,3,5,7,8,3<br>7,38,40  | 2,4,6,33,3<br>4,35,36,39 | 7  | D3ZUC6,P08649,P22006,P35280,P49134,Q62714,Q6IFW6                                           |
| 4060 | 1,3,5,7,8,3<br>7,39,40  | 2,4,6,33,3<br>4,35,36,38 | 4  | D3ZUC6,P49134,P80299,P97829                                                                |
| 4061 | 1,3,5,7,8,3<br>8,39,40  | 2,4,6,33,3<br>4,35,36,37 | 7  | D3ZUC6,O55145,P02770,P08649,P11883,P35280,P80020                                           |
| 4062 | 1,3,5,7,33,<br>34,35,36 | 2,4,6,8,37,<br>38,39,40  | 13 | D4A5U3,P08721,P12020,P47967,P51740,P55091,P97840,P98089,Q5GRG2,Q5I0D7,Q62635,Q6PCU2,Q8CIZ5 |
| 4063 | 1,3,5,7,33,<br>34,35,37 | 2,4,6,8,36,<br>38,39,40  | 10 | P08721,P12020,P47967,P51740,P54921,P55091,P98089,Q5BJY9,Q62635,Q8CIZ5                      |
| 4064 | 1,3,5,7,33,<br>34,35,38 | 2,4,6,8,36,<br>37,39,40  | 5  | P01946,P02091,P08721,P12020,Q5GRG2                                                         |
| 4065 | 1,3,5,7,33,<br>34,35,39 | 2,4,6,8,36,<br>37,38,40  | 3  | P12020,Q5GRG2,Q5RKI1                                                                       |
| 4066 | 1,3,5,7,33,<br>34,35,40 | 2,4,6,8,36,<br>37,38,39  | 1  | P12020                                                                                     |
| 4067 | 1,3,5,7,33,<br>34,36,37 | 2,4,6,8,35,<br>38,39,40  | 12 | D4A5U3,P00774,P08721,P47967,P51740,P54921,P55091,P97840,P98089,Q5EGZ1,Q62635,Q8CIZ5        |
| 4068 | 1,3,5,7,33,<br>34,36,38 | 2,4,6,8,35,<br>37,39,40  | 5  | P00774,P01946,P02091,P08721,P47967                                                         |
| 4069 | 1,3,5,7,33,<br>34,36,39 | 2,4,6,8,35,<br>37,38,40  | 5  | P08721,P98089,Q5RKI1,Q62635,Q99041                                                         |
| 4070 | 1,3,5,7,33,<br>34,36,40 | 2,4,6,8,35,<br>37,38,39  | 3  | P01681,P08721,P98089                                                                       |
| 4071 | 1,3,5,7,33,<br>34,37,38 | 2,4,6,8,35,<br>36,39,40  | 5  | P01946,P02091,P47967,P54921,Q6AY61                                                         |
| 4072 | 1,3,5,7,33,<br>34,37,39 | 2,4,6,8,35,<br>36,38,40  | 6  | P02793;Q7TP54,P98089,Q5RKI1,Q62635,Q6AY61,Q6AYQ8                                           |
| 4073 | 1,3,5,7,33,<br>34,37,40 | 2,4,6,8,35,<br>36,38,39  | 3  | P98089,Q62714,Q6AY61                                                                       |
| 4074 | 1,3,5,7,33,<br>34,38,39 | 2,4,6,8,35,<br>36,37,40  | 7  | P01946,P02091,P02770,P02793;Q7TP54,P19132,Q5RKI1,Q6AY61                                    |
| 4075 | 1,3,5,7,33,<br>34,38,40 | 2,4,6,8,35,<br>36,37,39  | 4  | P01946,P02091,Q62714,Q6AY61                                                                |
| 4076 | 1,3,5,7,33,<br>34,39,40 | 2,4,6,8,35,<br>36,37,38  | 2  | Q5RKI1,Q6AY61                                                                              |
| 4077 | 1,3,5,7,33,<br>35,36,37 | 2,4,6,8,34,<br>38,39,40  | 11 | D4A5U3,P08721,P20762,P47967,P51740,P55091,P97840,P98089,Q5BJY9,Q62635,Q8CIZ5               |

|      |                                              |                                                                                 |
|------|----------------------------------------------|---------------------------------------------------------------------------------|
| 4078 | 1,3,5,7,33, 2,4,6,8,34,<br>35,36,38 37,39,40 | 4 P08721,P20762,P47967,P97840                                                   |
| 4079 | 1,3,5,7,33, 2,4,6,8,34,<br>35,36,39 37,38,40 | 4 P12020,P23739,Q4KLZ6,Q5RKI1                                                   |
| 4080 | 1,3,5,7,33, 2,4,6,8,34,<br>35,36,40 37,38,39 | 4 D4A5U3,P01681,P20762,Q63618                                                   |
| 4081 | 1,3,5,7,33, 2,4,6,8,34,<br>35,37,38 36,39,40 | 3 P08649,P20762,P47967                                                          |
| 4082 | 1,3,5,7,33, 2,4,6,8,34,<br>35,37,39 36,38,40 | 4 P08649,P12020,Q4KLZ6,Q5RKI1                                                   |
| 4083 | 1,3,5,7,33, 2,4,6,8,34,<br>35,37,40 36,38,39 | 3 P08649,P20762,Q5BJY9                                                          |
| 4084 | 1,3,5,7,33, 2,4,6,8,34,<br>35,38,39 36,37,40 | 4 P02770,P08649,P12020,Q5RKI1                                                   |
| 4085 | 1,3,5,7,33, 2,4,6,8,34,<br>35,38,40 36,37,39 | 2 P08649,P20762                                                                 |
| 4086 | 1,3,5,7,33, 2,4,6,8,34,<br>35,39,40 36,37,38 | 4 P08649,P12020,Q4KLZ6,Q5RKI1                                                   |
| 4087 | 1,3,5,7,33, 2,4,6,8,34,<br>36,37,38 35,39,40 | 4 P00774,P20762,P47967,P97840                                                   |
| 4088 | 1,3,5,7,33, 2,4,6,8,34,<br>36,37,39 35,38,40 | 4 P00774,P98089,Q5RKI1,Q62635                                                   |
| 4089 | 1,3,5,7,33, 2,4,6,8,34,<br>36,37,40 35,38,39 | 5 P20762,P25809,P47967,P97840,P98089                                            |
| 4090 | 1,3,5,7,33, 2,4,6,8,34,<br>36,38,39 35,37,40 | 1 Q5RKI1                                                                        |
| 4091 | 1,3,5,7,33, 2,4,6,8,34,<br>36,38,40 35,37,39 | 3 P01681,P20762,P25809                                                          |
| 4092 | 1,3,5,7,33, 2,4,6,8,34,<br>36,39,40 35,37,38 | 3 P01681,P25809,Q5RKI1                                                          |
| 4093 | 1,3,5,7,33, 2,4,6,8,34,<br>37,38,39 35,36,40 | 5 P02770,P08649,P50280,Q5RKI1,Q6AY61                                            |
| 4094 | 1,3,5,7,33, 2,4,6,8,34,<br>37,38,40 35,36,39 | 5 P08649,P20762,Q62714,Q6AY61,Q9Z1F2                                            |
| 4095 | 1,3,5,7,33, 2,4,6,8,34,<br>37,39,40 35,36,38 | 4 P08649,P25809,Q5RKI1,Q6AY61                                                   |
| 4096 | 1,3,5,7,33, 2,4,6,8,34,<br>38,39,40 35,36,37 | 3 P02770,P08649,Q5RKI1                                                          |
| 4097 | 1,3,5,7,34, 2,4,6,8,33,<br>35,36,37 38,39,40 | 11 D4A5U3,P01039,P25031,P47967,P51740,P55091,P97840,P98089,Q5I0D1,Q62635,Q8CIZ5 |

|      |                                              |                                                    |
|------|----------------------------------------------|----------------------------------------------------|
| 4098 | 1,3,5,7,34, 2,4,6,8,33,<br>35,36,38 37,39,40 | 5 P01946,P02091,P47967,P97840,Q9QWN8               |
| 4099 | 1,3,5,7,34, 2,4,6,8,33,<br>35,36,39 37,38,40 | 3 P01039,P23739,Q68G31                             |
| 4100 | 1,3,5,7,34, 2,4,6,8,33,<br>35,36,40 37,38,39 | 2 Q68G31,Q9QWN8                                    |
| 4101 | 1,3,5,7,34, 2,4,6,8,33,<br>35,37,38 36,39,40 | 4 P01946,P02091,P08649,P47967                      |
| 4102 | 1,3,5,7,34, 2,4,6,8,33,<br>35,37,39 36,38,40 | 1 P01039                                           |
| 4103 | 1,3,5,7,34, 2,4,6,8,33,<br>35,37,40 36,38,39 | 1 P08649                                           |
| 4104 | 1,3,5,7,34, 2,4,6,8,33,<br>35,38,39 36,37,40 | 4 P01946,P02091,P08649,P12020                      |
| 4105 | 1,3,5,7,34, 2,4,6,8,33,<br>35,38,40 36,37,39 | 3 P01946,P02091,P08649                             |
| 4106 | 1,3,5,7,34, 2,4,6,8,33,<br>35,39,40 36,37,38 | 1 P12020                                           |
| 4107 | 1,3,5,7,34, 2,4,6,8,33,<br>36,37,38 35,39,40 | 5 P00774,P01946,P02091,P47967,P97840               |
| 4108 | 1,3,5,7,34, 2,4,6,8,33,<br>36,37,39 35,38,40 | 4 P01039,P47967,P98089,Q62635                      |
| 4109 | 1,3,5,7,34, 2,4,6,8,33,<br>36,37,40 35,38,39 | 6 P47967,P49134,P97840,P98089,Q68G31,Q811M5        |
| 4110 | 1,3,5,7,34, 2,4,6,8,33,<br>36,38,39 35,37,40 | 3 P01946,P02091,Q9QWN8                             |
| 4111 | 1,3,5,7,34, 2,4,6,8,33,<br>36,38,40 35,37,39 | 3 P01946,P02091,Q9QWN8                             |
| 4112 | 1,3,5,7,34, 2,4,6,8,33,<br>36,39,40 35,37,38 | 1 Q68G31                                           |
| 4113 | 1,3,5,7,34, 2,4,6,8,33,<br>37,38,39 35,36,40 | 4 P01946,P02091,P08649,Q6AY61                      |
| 4114 | 1,3,5,7,34, 2,4,6,8,33,<br>37,38,40 35,36,39 | 7 P01946,P02091,P08649,P20767,P49134,Q62714,Q6AY61 |
| 4115 | 1,3,5,7,34, 2,4,6,8,33,<br>37,39,40 35,36,38 | 3 P08649,P49134,Q6AY61                             |
| 4116 | 1,3,5,7,34, 2,4,6,8,33,<br>38,39,40 35,36,37 | 5 P01946,P02091,P02770,P08649,Q6AY61               |
| 4117 | 1,3,5,7,35, 2,4,6,8,33,<br>36,37,38 34,39,40 | 5 P19218,P20762,P47967,P97840,Q63532               |

|      |                                              |                                                           |
|------|----------------------------------------------|-----------------------------------------------------------|
| 4118 | 1,3,5,7,35, 2,4,6,8,33,<br>36,37,39 34,38,40 | 4 P01039,P25031,P47967,P97840                             |
| 4119 | 1,3,5,7,35, 2,4,6,8,33,<br>36,37,40 34,38,39 | 5 P19132,P20762,P47967,P97840,Q63532                      |
| 4120 | 1,3,5,7,35, 2,4,6,8,33,<br>36,38,39 34,37,40 | 3 O55004,P02631,Q9QWN8                                    |
| 4121 | 1,3,5,7,35, 2,4,6,8,33,<br>36,38,40 34,37,39 | 4 O55004,P08649,P20762,Q9QWN8                             |
| 4122 | 1,3,5,7,35, 2,4,6,8,33,<br>36,39,40 34,37,38 | 2 O55004,P23739                                           |
| 4123 | 1,3,5,7,35, 2,4,6,8,33,<br>37,38,39 34,36,40 | 3 D3ZUC6,O55004,P08649                                    |
| 4124 | 1,3,5,7,35, 2,4,6,8,33,<br>37,38,40 34,36,39 | 5 D3ZUC6,O55004,P08649,P20762,Q99MH3                      |
| 4125 | 1,3,5,7,35, 2,4,6,8,33,<br>37,39,40 34,36,38 | 4 D3ZUC6,O55004,P08649,P80299                             |
| 4126 | 1,3,5,7,35, 2,4,6,8,33,<br>38,39,40 34,36,37 | 5 D3ZUC6,O55004,O55145,P08649,Q63751                      |
| 4127 | 1,3,5,7,36, 2,4,6,8,33,<br>37,38,39 34,35,40 | 1 D3ZUC6                                                  |
| 4128 | 1,3,5,7,36, 2,4,6,8,33,<br>37,38,40 34,35,39 | 4 D3ZUC6,P08649,P20762,P25809                             |
| 4129 | 1,3,5,7,36, 2,4,6,8,33,<br>37,39,40 34,35,38 | 4 D3ZUC6,P25809,P80299,P97829                             |
| 4130 | 1,3,5,7,36, 2,4,6,8,33,<br>38,39,40 34,35,37 | 5 D3ZUC6,O55004,O89117,P25809,P80020                      |
| 4131 | 1,3,5,7,37, 2,4,6,8,33,<br>38,39,40 34,35,36 | 6 D3ZUC6,O55004,O89117,P02770,P08649,Q6AY61               |
| 4132 | 1,3,5,8,33, 2,4,6,7,37,<br>34,35,36 38,39,40 | 7 P01681,P01835,P08721,P51740,P55091,Q5QE79,Q9QX74        |
| 4133 | 1,3,5,8,33, 2,4,6,7,36,<br>34,35,37 38,39,40 | 2 P51740,P55091                                           |
| 4134 | 1,3,5,8,33, 2,4,6,7,36,<br>34,35,38 37,39,40 | 4 P01946,P02091,Q05511,Q6IG05                             |
| 4135 | 1,3,5,8,33, 2,4,6,7,36,<br>34,35,39 37,38,40 | 0                                                         |
| 4136 | 1,3,5,8,33, 2,4,6,7,36,<br>34,35,40 37,38,39 | 1 P01681                                                  |
| 4137 | 1,3,5,8,33, 2,4,6,7,35,<br>34,36,37 38,39,40 | 8 P00774,P47967,P51740,P55091,P98089,Q5EGZ1,Q5QE79,Q62635 |

|      |                                              |                                                           |
|------|----------------------------------------------|-----------------------------------------------------------|
| 4138 | 1,3,5,8,33, 2,4,6,7,35,<br>34,36,38 37,39,40 | 6 P01681,P01946,P02091,P02625,Q6IFU7,Q6IG05               |
| 4139 | 1,3,5,8,33, 2,4,6,7,35,<br>34,36,39 37,38,40 | 4 P00714,P01681,P98089,Q99041                             |
| 4140 | 1,3,5,8,33, 2,4,6,7,35,<br>34,36,40 37,38,39 | 1 P01681                                                  |
| 4141 | 1,3,5,8,33, 2,4,6,7,35,<br>34,37,38 36,39,40 | 7 P01946,P02091,Q4FZU2,Q6IFW6,Q6IG05,Q6IMF3,Q6P6Q2        |
| 4142 | 1,3,5,8,33, 2,4,6,7,35,<br>34,37,39 36,38,40 | 1 P02793;Q7TP54                                           |
| 4143 | 1,3,5,8,33, 2,4,6,7,35,<br>34,37,40 36,38,39 | 1 P13432                                                  |
| 4144 | 1,3,5,8,33, 2,4,6,7,35,<br>34,38,39 36,37,40 | 7 P01946,P02091,P02793;Q7TP54,P19132,Q6IFU7,Q6IG05,Q99041 |
| 4145 | 1,3,5,8,33, 2,4,6,7,35,<br>34,38,40 36,37,39 | 4 P01946,P02091,Q6IFU7,Q6IG05                             |
| 4146 | 1,3,5,8,33, 2,4,6,7,35,<br>34,39,40 36,37,38 | 2 P01681,Q6IFU7                                           |
| 4147 | 1,3,5,8,33, 2,4,6,7,34,<br>35,36,37 38,39,40 | 7 F1M3L7,P01681,P47967,P51740,P55091,P80299,Q80WL1        |
| 4148 | 1,3,5,8,33, 2,4,6,7,34,<br>35,36,38 37,39,40 | 3 P01681,P01835,Q80WL1                                    |
| 4149 | 1,3,5,8,33, 2,4,6,7,34,<br>35,36,39 37,38,40 | 7 P00714,P01681,P01835,P23739,P62804,Q4KLZ6,Q80WL1        |
| 4150 | 1,3,5,8,33, 2,4,6,7,34,<br>35,36,40 37,38,39 | 3 P01681,P01835,Q80WL1                                    |
| 4151 | 1,3,5,8,33, 2,4,6,7,34,<br>35,37,38 36,39,40 | 3 P07379,Q6IG05,Q80WL1                                    |
| 4152 | 1,3,5,8,33, 2,4,6,7,34,<br>35,37,39 36,38,40 | 3 P80299,Q4KLZ6,Q80WL1                                    |
| 4153 | 1,3,5,8,33, 2,4,6,7,34,<br>35,37,40 36,38,39 | 3 P01681,P80299,Q80WL1                                    |
| 4154 | 1,3,5,8,33, 2,4,6,7,34,<br>35,38,39 36,37,40 | 2 P11598,Q80WL1                                           |
| 4155 | 1,3,5,8,33, 2,4,6,7,34,<br>35,38,40 36,37,39 | 3 P01681,P11598,Q80WL1                                    |
| 4156 | 1,3,5,8,33, 2,4,6,7,34,<br>35,39,40 36,37,38 | 6 P01681,P11598,P62804,P80299,Q4KLZ6,Q80WL1               |
| 4157 | 1,3,5,8,33, 2,4,6,7,34,<br>36,37,38 35,39,40 | 3 P01681,Q6IG05,Q80WL1                                    |

|      |                                              |                                                    |
|------|----------------------------------------------|----------------------------------------------------|
| 4158 | 1,3,5,8,33, 2,4,6,7,34,<br>36,37,39 35,38,40 | 5 P00714,P01681,P80299,P98089,Q80WL1               |
| 4159 | 1,3,5,8,33, 2,4,6,7,34,<br>36,37,40 35,38,39 | 3 P01681,P80299,Q80WL1                             |
| 4160 | 1,3,5,8,33, 2,4,6,7,34,<br>36,38,39 35,37,40 | 6 P00714,P01681,P19132,Q6IFU7,Q80WL1,Q99041        |
| 4161 | 1,3,5,8,33, 2,4,6,7,34,<br>36,38,40 35,37,39 | 3 P01681,Q6IFU7,Q80WL1                             |
| 4162 | 1,3,5,8,33, 2,4,6,7,34,<br>36,39,40 35,37,38 | 3 P01681,Q80WL1,Q9R168                             |
| 4163 | 1,3,5,8,33, 2,4,6,7,34,<br>37,38,39 35,36,40 | 3 Q6IFW6,Q80WL1,Q9EQS0                             |
| 4164 | 1,3,5,8,33, 2,4,6,7,34,<br>37,38,40 35,36,39 | 4 Q62714,Q6IG05,Q80WL1,Q9Z1F2                      |
| 4165 | 1,3,5,8,33, 2,4,6,7,34,<br>37,39,40 35,36,38 | 3 P80299,Q80WL1,Q9QWN8                             |
| 4166 | 1,3,5,8,33, 2,4,6,7,34,<br>38,39,40 35,36,37 | 5 P01681,P11598,P19132,Q6IFU7,Q80WL1               |
| 4167 | 1,3,5,8,34, 2,4,6,7,33,<br>35,36,37 38,39,40 | 7 F1M3L7,P01039,P47967,P50116,P51740,P55091,Q62635 |
| 4168 | 1,3,5,8,34, 2,4,6,7,33,<br>35,36,38 37,39,40 | 3 P01946,P02091,Q6IG05                             |
| 4169 | 1,3,5,8,34, 2,4,6,7,33,<br>35,36,39 37,38,40 | 2 P01039,P23739                                    |
| 4170 | 1,3,5,8,34, 2,4,6,7,33,<br>35,36,40 37,38,39 | 0                                                  |
| 4171 | 1,3,5,8,34, 2,4,6,7,33,<br>35,37,38 36,39,40 | 4 P01946,P02091,P07379,Q6IG05                      |
| 4172 | 1,3,5,8,34, 2,4,6,7,33,<br>35,37,39 36,38,40 | 2 P01039,P50116                                    |
| 4173 | 1,3,5,8,34, 2,4,6,7,33,<br>35,37,40 36,38,39 | 1 Q923V8                                           |
| 4174 | 1,3,5,8,34, 2,4,6,7,33,<br>35,38,39 36,37,40 | 3 P01946,P02091,P11598                             |
| 4175 | 1,3,5,8,34, 2,4,6,7,33,<br>35,38,40 36,37,39 | 4 P01946,P02091,P11598,P97580                      |
| 4176 | 1,3,5,8,34, 2,4,6,7,33,<br>35,39,40 36,37,38 | 1 P11598                                           |
| 4177 | 1,3,5,8,34, 2,4,6,7,33,<br>36,37,38 35,39,40 | 5 P01039,P01946,P02091,Q6IFW6,Q6IG05               |

|      |                                              |                                                           |
|------|----------------------------------------------|-----------------------------------------------------------|
| 4178 | 1,3,5,8,34, 2,4,6,7,33,<br>36,37,39 35,38,40 | 3 P00714,P01039,P98089                                    |
| 4179 | 1,3,5,8,34, 2,4,6,7,33,<br>36,37,40 35,38,39 | 3 P13432,P49134,Q811M5                                    |
| 4180 | 1,3,5,8,34, 2,4,6,7,33,<br>36,38,39 35,37,40 | 2 P01946,P02091                                           |
| 4181 | 1,3,5,8,34, 2,4,6,7,33,<br>36,38,40 35,37,39 | 2 P01946,P02091                                           |
| 4182 | 1,3,5,8,34, 2,4,6,7,33,<br>36,39,40 35,37,38 | 1 Q9R168                                                  |
| 4183 | 1,3,5,8,34, 2,4,6,7,33,<br>37,38,39 35,36,40 | 6 P01946,P02091,P49134,Q6IFW6,Q6IG05,Q9EQS0               |
| 4184 | 1,3,5,8,34, 2,4,6,7,33,<br>37,38,40 35,36,39 | 8 P01946,P02091,P49134,Q4FZU2,Q6IFW6,Q6IG05,Q6IMF3,Q6P6Q2 |
| 4185 | 1,3,5,8,34, 2,4,6,7,33,<br>37,39,40 35,36,38 | 3 P13432,P49134,Q923V8                                    |
| 4186 | 1,3,5,8,34, 2,4,6,7,33,<br>38,39,40 35,36,37 | 4 P01946,P02091,P97580,Q6IFU7                             |
| 4187 | 1,3,5,8,35, 2,4,6,7,33,<br>36,37,38 34,39,40 | 6 F1M3L7,P01039,P07379,P19218,P80299,Q80WL1               |
| 4188 | 1,3,5,8,35, 2,4,6,7,33,<br>36,37,39 34,38,40 | 7 F1M3L7,P01039,P23739,P50116,P80299,P97829,Q80WL1        |
| 4189 | 1,3,5,8,35, 2,4,6,7,33,<br>36,37,40 34,38,39 | 6 F1M3L7,P50116,P80299,P97829,Q80WL1,Q9WVH8               |
| 4190 | 1,3,5,8,35, 2,4,6,7,33,<br>36,38,39 34,37,40 | 3 P11598,P23739,Q80WL1                                    |
| 4191 | 1,3,5,8,35, 2,4,6,7,33,<br>36,38,40 34,37,39 | 3 P11598,Q80WL1,Q9WVH8                                    |
| 4192 | 1,3,5,8,35, 2,4,6,7,33,<br>36,39,40 34,37,38 | 5 P11598,P23739,P80299,Q80WL1,Q9R168                      |
| 4193 | 1,3,5,8,35, 2,4,6,7,33,<br>37,38,39 34,36,40 | 5 D3ZUC6,P07379,P08649,P80299,Q80WL1                      |
| 4194 | 1,3,5,8,35, 2,4,6,7,33,<br>37,38,40 34,36,39 | 5 D3ZUC6,P07379,P08649,P80299,Q80WL1                      |
| 4195 | 1,3,5,8,35, 2,4,6,7,33,<br>37,39,40 34,36,38 | 6 D3ZUC6,P50116,P80299,P82471,Q80WL1,Q9R168               |
| 4196 | 1,3,5,8,35, 2,4,6,7,33,<br>38,39,40 34,36,37 | 8 D3ZUC6,O55004,O55145,P08649,P11598,P80299,Q63751,Q80WL1 |
| 4197 | 1,3,5,8,36, 2,4,6,7,33,<br>37,38,39 34,35,40 | 4 D3ZUC6,P80299,Q80WL1,Q9EQS0                             |

|      |                                              |                                                                                            |
|------|----------------------------------------------|--------------------------------------------------------------------------------------------|
| 4198 | 1,3,5,8,36, 2,4,6,7,33,<br>37,38,40 34,35,39 | 3 D3ZUC6,P80299,Q80WL1                                                                     |
| 4199 | 1,3,5,8,36, 2,4,6,7,33,<br>37,39,40 34,35,38 | 5 D3ZUC6,P80299,P97829,Q80WL1,Q9R168                                                       |
| 4200 | 1,3,5,8,36, 2,4,6,7,33,<br>38,39,40 34,35,37 | 5 D3ZUC6,P80020,P80299,Q80WL1,Q9R168                                                       |
| 4201 | 1,3,5,8,37, 2,4,6,7,33,<br>38,39,40 34,35,36 | 8 D3ZUC6,P08649,P08721,P80299,Q5I0D7,Q6IFW6,Q80WL1,Q9R168                                  |
| 4202 | 1,3,5,33,3 2,4,6,7,8,3<br>4,35,36,37 8,39,40 | 12 D4A5U3,P20762,P22273,P47967,P50115,P51740,P55091,P98089,Q5QE79,Q62635,Q6PCU2,Q8<br>CIZ5 |
| 4203 | 1,3,5,33,3 2,4,6,7,8,3<br>4,35,36,38 7,39,40 | 8 P01946,P02091,P02631,P08721,P12020,P20762,P22273,Q99041                                  |
| 4204 | 1,3,5,33,3 2,4,6,7,8,3<br>4,35,36,39 7,38,40 | 6 P02631,P12020,P22273,P23739,Q5GRG2,Q99041                                                |
| 4205 | 1,3,5,33,3 2,4,6,7,8,3<br>4,35,36,40 7,38,39 | 10 D4A5U3,P01681,P12020,P20762,P22273,Q5QE79,Q63617,Q63618,Q6PCU2,Q9Z0J6                   |
| 4206 | 1,3,5,33,3 2,4,6,7,8,3<br>4,35,37,38 6,39,40 | 5 P01946,P02091,P12020,P20762,P22273                                                       |
| 4207 | 1,3,5,33,3 2,4,6,7,8,3<br>4,35,37,39 6,38,40 | 1 P12020                                                                                   |
| 4208 | 1,3,5,33,3 2,4,6,7,8,3<br>4,35,37,40 6,38,39 | 2 P20762,P50115                                                                            |
| 4209 | 1,3,5,33,3 2,4,6,7,8,3<br>4,35,38,39 6,37,40 | 11 P01946,P02091,P06911,P0C0A9,P11598,P12020,P19132,P22273,Q5GRG2,Q63617,Q99041            |
| 4210 | 1,3,5,33,3 2,4,6,7,8,3<br>4,35,38,40 6,37,39 | 9 P01946,P02091,P0C0A9,P11598,P12020,P22273,P22282,P63029,Q63617                           |
| 4211 | 1,3,5,33,3 2,4,6,7,8,3<br>4,35,39,40 6,37,38 | 5 P11598,P12020,P22273,Q63617,Q99041                                                       |
| 4212 | 1,3,5,33,3 2,4,6,7,8,3<br>4,36,37,38 5,39,40 | 6 P00774,P01946,P02091,P20762,P22273,Q99041                                                |
| 4213 | 1,3,5,33,3 2,4,6,7,8,3<br>4,36,37,39 5,38,40 | 5 P00774,P22273,P98089,Q62635,Q99041                                                       |
| 4214 | 1,3,5,33,3 2,4,6,7,8,3<br>4,36,37,40 5,38,39 | 2 P20762,P98089                                                                            |
| 4215 | 1,3,5,33,3 2,4,6,7,8,3<br>4,36,38,39 5,37,40 | 6 P01946,P02091,P19132,P22273,Q63617,Q99041                                                |
| 4216 | 1,3,5,33,3 2,4,6,7,8,3<br>4,36,38,40 5,37,39 | 8 P01681,P01946,P02091,P20762,P22273,P22282,Q63617,Q99041                                  |
| 4217 | 1,3,5,33,3 2,4,6,7,8,3<br>4,36,39,40 5,37,38 | 5 P01681,P19218,P22273,Q63617,Q99041                                                       |



|      |                                              |                                                                                 |
|------|----------------------------------------------|---------------------------------------------------------------------------------|
| 4218 | 1,3,5,33,3 2,4,6,7,8,3<br>4,37,38,39 5,36,40 | 5 P01946,P02091,P02793;Q7TP54,Q6AY61,Q99041                                     |
| 4219 | 1,3,5,33,3 2,4,6,7,8,3<br>4,37,38,40 5,36,39 | 6 P01946,P02091,P20762,Q62714,Q6AY61,Q9Z1F2                                     |
| 4220 | 1,3,5,33,3 2,4,6,7,8,3<br>4,37,39,40 5,36,38 | 1 P19218                                                                        |
| 4221 | 1,3,5,33,3 2,4,6,7,8,3<br>4,38,39,40 5,36,37 | 8 P01946,P02091,P11598,P19132,P22273,P22282,Q63617,Q99041                       |
| 4222 | 1,3,5,33,3 2,4,6,7,8,3<br>5,36,37,38 4,39,40 | 4 P02631,P20762,P22273,Q9Z0V6                                                   |
| 4223 | 1,3,5,33,3 2,4,6,7,8,3<br>5,36,37,39 4,38,40 | 4 P02631,P23739,P62804,Q80WL1                                                   |
| 4224 | 1,3,5,33,3 2,4,6,7,8,3<br>5,36,37,40 4,38,39 | 8 D4A5U3,F1M3L7,P01681,P20762,P50115,Q4G075,Q63618,Q9Z0V6                       |
| 4225 | 1,3,5,33,3 2,4,6,7,8,3<br>5,36,38,39 4,37,40 | 10 P02631,P0C0A9,P11598,P12020,P22273,P22282,P23739,P62804,Q63617,Q99041        |
| 4226 | 1,3,5,33,3 2,4,6,7,8,3<br>5,36,38,40 4,37,39 | 10 P01681,P02631,P0C0A9,P11598,P20762,P22273,P22282,P62804,Q63617,Q9Z0V6        |
| 4227 | 1,3,5,33,3 2,4,6,7,8,3<br>5,36,39,40 4,37,38 | 11 P01681,P02631,P11598,P12020,P22273,P22282,P23739,P62804,Q63617,Q80WL1,Q99041 |
| 4228 | 1,3,5,33,3 2,4,6,7,8,3<br>5,37,38,39 4,36,40 | 4 P02631,P08649,P12020,Q80WL1                                                   |
| 4229 | 1,3,5,33,3 2,4,6,7,8,3<br>5,37,38,40 4,36,39 | 5 P08649,P20762,Q80WL1,Q9Z0V6,Q9Z1F2                                            |
| 4230 | 1,3,5,33,3 2,4,6,7,8,3<br>5,37,39,40 4,36,38 | 6 P08649,P12020,P50115,P62804,P80299,Q80WL1                                     |
| 4231 | 1,3,5,33,3 2,4,6,7,8,3<br>5,38,39,40 4,36,37 | 10 P06761,P08649,P0C0A9,P11598,P12020,P22273,P22282,P62804,Q63617,Q80WL1        |
| 4232 | 1,3,5,33,3 2,4,6,7,8,3<br>6,37,38,39 4,35,40 | 4 P02631,P50280,Q80WL1,Q99041                                                   |
| 4233 | 1,3,5,33,3 2,4,6,7,8,3<br>6,37,38,40 4,35,39 | 5 P20762,P25809,Q80WL1,Q9Z0V6,Q9Z1F2                                            |
| 4234 | 1,3,5,33,3 2,4,6,7,8,3<br>6,37,39,40 4,35,38 | 3 P01681,P25809,Q80WL1                                                          |
| 4235 | 1,3,5,33,3 2,4,6,7,8,3<br>6,38,39,40 4,35,37 | 8 P01681,P11598,P22273,P22282,P25809,Q63617,Q80WL1,Q99041                       |
| 4236 | 1,3,5,33,3 2,4,6,7,8,3<br>7,38,39,40 4,35,36 | 4 P08649,P50280,Q80WL1,Q9Z1F2                                                   |
| 4237 | 1,3,5,34,3 2,4,6,7,8,3<br>5,36,37,38 3,39,40 | 7 D3ZTE0,O54858,P01946,P02091,P02631,P20762,P22273                              |

|      |                                              |                                                                                               |
|------|----------------------------------------------|-----------------------------------------------------------------------------------------------|
| 4238 | 1,3,5,34,3 2,4,6,7,8,3<br>5,36,37,39 3,38,40 | 7 P01039,P02631,P22273,P23739,P25031,P50115,P50116                                            |
| 4239 | 1,3,5,34,3 2,4,6,7,8,3<br>5,36,37,40 3,38,39 | 6 P02631,P20762,P22273,P50115,P50116,Q4G075                                                   |
| 4240 | 1,3,5,34,3 2,4,6,7,8,3<br>5,36,38,39 3,37,40 | 10 P01946,P02091,P02631,P0C0A9,P11598,P22273,P23739,Q63617,Q99041,Q9QW07                      |
| 4241 | 1,3,5,34,3 2,4,6,7,8,3<br>5,36,38,40 3,37,39 | 8 P01946,P02091,P02631,P0C0A9,P11598,P22273,P22282,Q63617                                     |
| 4242 | 1,3,5,34,3 2,4,6,7,8,3<br>5,36,39,40 3,37,38 | 6 P02631,P11598,P22273,P23739,P50115,Q63617                                                   |
| 4243 | 1,3,5,34,3 2,4,6,7,8,3<br>5,37,38,39 3,36,40 | 6 O54858,P01946,P02091,P02631,P08649,Q9QZQ5                                                   |
| 4244 | 1,3,5,34,3 2,4,6,7,8,3<br>5,37,38,40 3,36,39 | 5 P01946,P02091,P02631,P08649,Q9QZQ5                                                          |
| 4245 | 1,3,5,34,3 2,4,6,7,8,3<br>5,37,39,40 3,36,38 | 4 P02631,P08649,P50115,P50116                                                                 |
| 4246 | 1,3,5,34,3 2,4,6,7,8,3<br>5,38,39,40 3,36,37 | 13 P01946,P02091,P02631,P07171,P08649,P08723,P0C0A9,P11598,P22273,P22282,Q63617,Q63751,Q9QZQ5 |
| 4247 | 1,3,5,34,3 2,4,6,7,8,3<br>6,37,38,39 3,35,40 | 5 O54858,P01946,P02091,P02631,P22273                                                          |
| 4248 | 1,3,5,34,3 2,4,6,7,8,3<br>6,37,38,40 3,35,39 | 6 O54858,P01946,P02091,P02631,P20762,P22273                                                   |
| 4249 | 1,3,5,34,3 2,4,6,7,8,3<br>6,37,39,40 3,35,38 | 2 P02631,P50115                                                                               |
| 4250 | 1,3,5,34,3 2,4,6,7,8,3<br>6,38,39,40 3,35,37 | 9 P01946,P02091,P02631,P0C0A9,P11598,P22273,P48032,Q63617,Q99041                              |
| 4251 | 1,3,5,34,3 2,4,6,7,8,3<br>7,38,39,40 3,35,36 | 6 O54858,P01946,P02091,P08649,Q6AY61,Q9QZQ5                                                   |
| 4252 | 1,3,5,35,3 2,4,6,7,8,3<br>6,37,38,39 3,34,40 | 4 O54858,O55004,P02631,Q9QW30                                                                 |
| 4253 | 1,3,5,35,3 2,4,6,7,8,3<br>6,37,38,40 3,34,39 | 10 D3ZTE0,O54858,O55004,P02631,P08649,P20762,Q63532,Q9QW30,Q9QX74,Q9Z0V6                      |
| 4254 | 1,3,5,35,3 2,4,6,7,8,3<br>6,37,39,40 3,34,38 | 6 O54858,O55004,P02631,P50115,P50116,P80299                                                   |
| 4255 | 1,3,5,35,3 2,4,6,7,8,3<br>6,38,39,40 3,34,37 | 9 O54858,O55004,P02631,P0C0A9,P11598,P22273,P22282,Q63617,Q63751                              |
| 4256 | 1,3,5,35,3 2,4,6,7,8,3<br>7,38,39,40 3,34,36 | 12 O54858,O55004,P02631,P08649,P11598,P80299,Q63751,Q80WL1,Q99PP0,Q9QW30,Q9QX74,Q9QZQ5        |
| 4257 | 1,3,5,36,3 2,4,6,7,8,3<br>7,38,39,40 3,34,35 | 7 D3ZUC6,O54858,O55004,P02631,P80299,Q9QW30,Q9QX74                                            |

|      |                        |                          |    |                                                                              |
|------|------------------------|--------------------------|----|------------------------------------------------------------------------------|
| 4258 | 1,3,6,7,8,3<br>3,34,35 | 2,4,5,36,3<br>7,38,39,40 | 3  | O89117,P08721,Q9QX74                                                         |
| 4259 | 1,3,6,7,8,3<br>3,34,36 | 2,4,5,35,3<br>7,38,39,40 | 11 | O89117,P00774,P08494,P08649,P08721,P19223,P26772,P55091,P98089,Q62635,Q9QX74 |
| 4260 | 1,3,6,7,8,3<br>3,34,37 | 2,4,5,35,3<br>6,38,39,40 | 6  | O89117,P21674,P55091,P98089,Q62635,Q9QW07                                    |
| 4261 | 1,3,6,7,8,3<br>3,34,38 | 2,4,5,35,3<br>6,37,39,40 | 6  | O70417,P01946,P02091,P02625,P35280,Q6IG05                                    |
| 4262 | 1,3,6,7,8,3<br>3,34,39 | 2,4,5,35,3<br>6,37,38,40 | 4  | P02651,P21674,Q5RKI1,Q62894                                                  |
| 4263 | 1,3,6,7,8,3<br>3,34,40 | 2,4,5,35,3<br>6,37,38,39 | 1  | P21674                                                                       |
| 4264 | 1,3,6,7,8,3<br>3,35,36 | 2,4,5,34,3<br>7,38,39,40 | 3  | P01681,P08721,Q4KLZ6                                                         |
| 4265 | 1,3,6,7,8,3<br>3,35,37 | 2,4,5,34,3<br>6,38,39,40 | 2  | Q4KLZ6,Q9QW07                                                                |
| 4266 | 1,3,6,7,8,3<br>3,35,38 | 2,4,5,34,3<br>6,37,39,40 | 2  | O70417,P35280                                                                |
| 4267 | 1,3,6,7,8,3<br>3,35,39 | 2,4,5,34,3<br>6,37,38,40 | 2  | Q4KLZ6,Q5RKI1                                                                |
| 4268 | 1,3,6,7,8,3<br>3,35,40 | 2,4,5,34,3<br>6,37,38,39 | 1  | Q4KLZ6                                                                       |
| 4269 | 1,3,6,7,8,3<br>3,36,37 | 2,4,5,34,3<br>5,38,39,40 | 9  | P00774,P08723,P09656,P55091,P70549,P98089,Q62635,Q63493,Q9QW07               |
| 4270 | 1,3,6,7,8,3<br>3,36,38 | 2,4,5,34,3<br>5,37,39,40 | 2  | O70417,P35280                                                                |
| 4271 | 1,3,6,7,8,3<br>3,36,39 | 2,4,5,34,3<br>5,37,38,40 | 2  | Q4KLZ6,Q5RKI1                                                                |
| 4272 | 1,3,6,7,8,3<br>3,36,40 | 2,4,5,34,3<br>5,37,38,39 | 1  | P01681                                                                       |
| 4273 | 1,3,6,7,8,3<br>3,37,38 | 2,4,5,34,3<br>5,36,39,40 | 1  | P35280                                                                       |
| 4274 | 1,3,6,7,8,3<br>3,37,39 | 2,4,5,34,3<br>5,36,38,40 | 3  | P21674,Q4KLZ6,Q5RKI1                                                         |
| 4275 | 1,3,6,7,8,3<br>3,37,40 | 2,4,5,34,3<br>5,36,38,39 | 3  | P21674,Q62714,Q9QW07                                                         |
| 4276 | 1,3,6,7,8,3<br>3,38,39 | 2,4,5,34,3<br>5,36,37,40 | 4  | P02770,P07174,P35280,Q5RKI1                                                  |
| 4277 | 1,3,6,7,8,3<br>3,38,40 | 2,4,5,34,3<br>5,36,37,39 | 3  | O70417,P25031,P35280                                                         |

|      |                        |                          |   |                                                         |
|------|------------------------|--------------------------|---|---------------------------------------------------------|
| 4278 | 1,3,6,7,8,3<br>3,39,40 | 2,4,5,34,3<br>5,36,37,38 | 3 | P21674,Q4KLZ6,Q5RKI1                                    |
| 4279 | 1,3,6,7,8,3<br>4,35,36 | 2,4,5,33,3<br>7,38,39,40 | 4 | P01039,P19223,P55091,Q9Z1F2                             |
| 4280 | 1,3,6,7,8,3<br>4,35,37 | 2,4,5,33,3<br>6,38,39,40 | 4 | P01039,P36860,P55091,Q923V8                             |
| 4281 | 1,3,6,7,8,3<br>4,35,38 | 2,4,5,33,3<br>6,37,39,40 | 4 | O70417,P01946,P02091,P35280                             |
| 4282 | 1,3,6,7,8,3<br>4,35,39 | 2,4,5,33,3<br>6,37,38,40 | 2 | P36860,Q9Z1F2                                           |
| 4283 | 1,3,6,7,8,3<br>4,35,40 | 2,4,5,33,3<br>6,37,38,39 | 2 | P15399,P97580                                           |
| 4284 | 1,3,6,7,8,3<br>4,36,37 | 2,4,5,33,3<br>5,38,39,40 | 8 | P00774,P01039,P49134,P55091,P70502,P98089,Q62635,Q9JI85 |
| 4285 | 1,3,6,7,8,3<br>4,36,38 | 2,4,5,33,3<br>5,37,39,40 | 5 | O70417,P01946,P02091,P02625,P35280                      |
| 4286 | 1,3,6,7,8,3<br>4,36,39 | 2,4,5,33,3<br>5,37,38,40 | 1 | Q9Z1F2                                                  |
| 4287 | 1,3,6,7,8,3<br>4,36,40 | 2,4,5,33,3<br>5,37,38,39 | 1 | P70502                                                  |
| 4288 | 1,3,6,7,8,3<br>4,37,38 | 2,4,5,33,3<br>5,36,39,40 | 5 | P01946,P02091,P35280,P49134,Q9EQS0                      |
| 4289 | 1,3,6,7,8,3<br>4,37,39 | 2,4,5,33,3<br>5,36,38,40 | 3 | P01039,P21674,P49134                                    |
| 4290 | 1,3,6,7,8,3<br>4,37,40 | 2,4,5,33,3<br>5,36,38,39 | 5 | P13432,P21674,P49134,Q923V8,Q9QW07                      |
| 4291 | 1,3,6,7,8,3<br>4,38,39 | 2,4,5,33,3<br>5,36,37,40 | 4 | P01946,P02091,P35280,Q9EQS0                             |
| 4292 | 1,3,6,7,8,3<br>4,38,40 | 2,4,5,33,3<br>5,36,37,39 | 7 | O70417,P01946,P02091,P15399,P35280,P49134,P97580        |
| 4293 | 1,3,6,7,8,3<br>4,39,40 | 2,4,5,33,3<br>5,36,37,38 | 4 | P15399,P21674,P49134,P97580                             |
| 4294 | 1,3,6,7,8,3<br>5,36,37 | 2,4,5,33,3<br>4,38,39,40 | 7 | P01039,P09656,P19132,P19218,P55091,P70549,P97829        |
| 4295 | 1,3,6,7,8,3<br>5,36,38 | 2,4,5,33,3<br>4,37,39,40 | 3 | O70417,P19218,P35280                                    |
| 4296 | 1,3,6,7,8,3<br>5,36,39 | 2,4,5,33,3<br>4,37,38,40 | 4 | P01039,P97829,Q4KLZ6,Q9Z1F2                             |
| 4297 | 1,3,6,7,8,3<br>5,36,40 | 2,4,5,33,3<br>4,37,38,39 | 1 | P02793;Q7TP54                                           |

|      |                         |                          |   |                                                                |
|------|-------------------------|--------------------------|---|----------------------------------------------------------------|
| 4298 | 1,3,6,7,8,3<br>5,37,38  | 2,4,5,33,3<br>4,36,39,40 | 2 | P19218,P35280                                                  |
| 4299 | 1,3,6,7,8,3<br>5,37,39  | 2,4,5,33,3<br>4,36,38,40 | 3 | P01039,P97829,Q4KLZ6                                           |
| 4300 | 1,3,6,7,8,3<br>5,37,40  | 2,4,5,33,3<br>4,36,38,39 | 5 | P19132,P70549,P80299,Q99041,Q9QW07                             |
| 4301 | 1,3,6,7,8,3<br>5,38,39  | 2,4,5,33,3<br>4,36,37,40 | 1 | P35280                                                         |
| 4302 | 1,3,6,7,8,3<br>5,38,40  | 2,4,5,33,3<br>4,36,37,39 | 3 | O70417,P35280,Q62812                                           |
| 4303 | 1,3,6,7,8,3<br>5,39,40  | 2,4,5,33,3<br>4,36,37,38 | 1 | Q4KLZ6                                                         |
| 4304 | 1,3,6,7,8,3<br>6,37,38  | 2,4,5,33,3<br>4,35,39,40 | 4 | P06911,P09656,P19218,P35280                                    |
| 4305 | 1,3,6,7,8,3<br>6,37,39  | 2,4,5,33,3<br>4,35,38,40 | 5 | P01039,P06911,P09656,P70549,P97829                             |
| 4306 | 1,3,6,7,8,3<br>6,37,40  | 2,4,5,33,3<br>4,35,38,39 | 9 | P06911,P09656,P19132,P19629,P70502,P70549,P97829,Q5GRG2,Q9QW07 |
| 4307 | 1,3,6,7,8,3<br>6,38,39  | 2,4,5,33,3<br>4,35,37,40 | 2 | P35280,P80020                                                  |
| 4308 | 1,3,6,7,8,3<br>6,38,40  | 2,4,5,33,3<br>4,35,37,39 | 4 | O70417,P35280,P57113,P80020                                    |
| 4309 | 1,3,6,7,8,3<br>6,39,40  | 2,4,5,33,3<br>4,35,37,38 | 2 | P80020,P97829                                                  |
| 4310 | 1,3,6,7,8,3<br>7,38,39  | 2,4,5,33,3<br>4,35,36,40 | 3 | D3ZUC6,P35280,Q9EQS0                                           |
| 4311 | 1,3,6,7,8,3<br>7,38,40  | 2,4,5,33,3<br>4,35,36,39 | 6 | D3ZUC6,P35280,P49134,Q5GRG2,Q62714,Q9QW07                      |
| 4312 | 1,3,6,7,8,3<br>7,39,40  | 2,4,5,33,3<br>4,35,36,38 | 7 | D3ZUC6,P21674,P49134,P80299,P97829,Q62997,Q9QW07               |
| 4313 | 1,3,6,7,8,3<br>8,39,40  | 2,4,5,33,3<br>4,35,36,37 | 7 | D3ZUC6,P02770,P35280,P51740,P57113,P80020,Q5QE79               |
| 4314 | 1,3,6,7,33,<br>34,35,36 | 2,4,5,8,37,<br>38,39,40  | 8 | D4A5U3,O89117,P08494,P08721,Q5I0D7,Q62635,Q6PCU2,Q8CIZ5        |
| 4315 | 1,3,6,7,33,<br>34,35,37 | 2,4,5,8,36,<br>38,39,40  | 6 | O89117,P08721,Q5BJY9,Q62635,Q6PCU2,Q8CIZ5                      |
| 4316 | 1,3,6,7,33,<br>34,35,38 | 2,4,5,8,36,<br>37,39,40  | 3 | P01946,P02091,P08721                                           |
| 4317 | 1,3,6,7,33,<br>34,35,39 | 2,4,5,8,36,<br>37,38,40  | 2 | P08721,Q5RKI1                                                  |

|      |                                              |                                                           |
|------|----------------------------------------------|-----------------------------------------------------------|
| 4318 | 1,3,6,7,33, 2,4,5,8,36,<br>34,35,40 37,38,39 | 1 P08721                                                  |
| 4319 | 1,3,6,7,33, 2,4,5,8,35,<br>34,36,37 38,39,40 | 8 P00774,P08721,P09656,P55091,P70549,P98089,Q62635,Q8CIZ5 |
| 4320 | 1,3,6,7,33, 2,4,5,8,35,<br>34,36,38 37,39,40 | 4 P00774,P01946,P02091,P08721                             |
| 4321 | 1,3,6,7,33, 2,4,5,8,35,<br>34,36,39 37,38,40 | 4 P02651,P08721,Q5RKI1,Q62635                             |
| 4322 | 1,3,6,7,33, 2,4,5,8,35,<br>34,36,40 37,38,39 | 1 P08721                                                  |
| 4323 | 1,3,6,7,33, 2,4,5,8,35,<br>34,37,38 36,39,40 | 2 P01946,P02091                                           |
| 4324 | 1,3,6,7,33, 2,4,5,8,35,<br>34,37,39 36,38,40 | 3 P21674,Q5RKI1,Q62635                                    |
| 4325 | 1,3,6,7,33, 2,4,5,8,35,<br>34,37,40 36,38,39 | 3 P21674,Q62714,Q9QW07                                    |
| 4326 | 1,3,6,7,33, 2,4,5,8,35,<br>34,38,39 36,37,40 | 5 P01946,P02091,P02770,Q5RKI1,Q9QX79                      |
| 4327 | 1,3,6,7,33, 2,4,5,8,35,<br>34,38,40 36,37,39 | 3 P01946,P02091,Q62714                                    |
| 4328 | 1,3,6,7,33, 2,4,5,8,35,<br>34,39,40 36,37,38 | 2 P21674,Q5RKI1                                           |
| 4329 | 1,3,6,7,33, 2,4,5,8,34,<br>35,36,37 38,39,40 | 8 D4A5U3,P08721,P09656,P20762,P55091,P70549,Q62635,Q8CIZ5 |
| 4330 | 1,3,6,7,33, 2,4,5,8,34,<br>35,36,38 37,39,40 | 2 P08721,P20762                                           |
| 4331 | 1,3,6,7,33, 2,4,5,8,34,<br>35,36,39 37,38,40 | 3 P08721,Q4KLZ6,Q5RKI1                                    |
| 4332 | 1,3,6,7,33, 2,4,5,8,34,<br>35,36,40 37,38,39 | 5 D4A5U3,P05539,P08721,P20762,P70549                      |
| 4333 | 1,3,6,7,33, 2,4,5,8,34,<br>35,37,38 36,39,40 | 1 P20762                                                  |
| 4334 | 1,3,6,7,33, 2,4,5,8,34,<br>35,37,39 36,38,40 | 3 P70549,Q4KLZ6,Q5RKI1                                    |
| 4335 | 1,3,6,7,33, 2,4,5,8,34,<br>35,37,40 36,38,39 | 4 P05539,P20762,P70549,Q9QW07                             |
| 4336 | 1,3,6,7,33, 2,4,5,8,34,<br>35,38,39 36,37,40 | 1 Q5RKI1                                                  |
| 4337 | 1,3,6,7,33, 2,4,5,8,34,<br>35,38,40 36,37,39 | 3 P05539,P20762,Q62812                                    |

|      |                                              |                                                                                 |
|------|----------------------------------------------|---------------------------------------------------------------------------------|
| 4338 | 1,3,6,7,33, 2,4,5,8,34,<br>35,39,40 36,37,38 | 3 P05539,Q4KLZ6,Q5RKI1                                                          |
| 4339 | 1,3,6,7,33, 2,4,5,8,34,<br>36,37,38 35,39,40 | 4 P00774,P09656,P20762,P70549                                                   |
| 4340 | 1,3,6,7,33, 2,4,5,8,34,<br>36,37,39 35,38,40 | 6 P00774,P09656,P70549,P98089,Q5RKI1,Q62635                                     |
| 4341 | 1,3,6,7,33, 2,4,5,8,34,<br>36,37,40 35,38,39 | 6 P09656,P20762,P25809,P70549,Q9QW07,Q9Z0V6                                     |
| 4342 | 1,3,6,7,33, 2,4,5,8,34,<br>36,38,39 35,37,40 | 1 Q5RKI1                                                                        |
| 4343 | 1,3,6,7,33, 2,4,5,8,34,<br>36,38,40 35,37,39 | 3 P20762,P25809,Q9Z0V6                                                          |
| 4344 | 1,3,6,7,33, 2,4,5,8,34,<br>36,39,40 35,37,38 | 3 P25809,P70549,Q5RKI1                                                          |
| 4345 | 1,3,6,7,33, 2,4,5,8,34,<br>37,38,39 35,36,40 | 2 P02770,Q5RKI1                                                                 |
| 4346 | 1,3,6,7,33, 2,4,5,8,34,<br>37,38,40 35,36,39 | 5 P20762,P23739,P25809,Q62714,Q9Z1F2                                            |
| 4347 | 1,3,6,7,33, 2,4,5,8,34,<br>37,39,40 35,36,38 | 4 P21674,P25809,P70549,Q5RKI1                                                   |
| 4348 | 1,3,6,7,33, 2,4,5,8,34,<br>38,39,40 35,36,37 | 4 P02770,P25809,P51740,Q5RKI1                                                   |
| 4349 | 1,3,6,7,34, 2,4,5,8,33,<br>35,36,37 38,39,40 | 11 D4A5U3,P01039,P09656,P19132,P25031,P39069,P47967,P55091,P70549,Q62635,Q8CIZ5 |
| 4350 | 1,3,6,7,34, 2,4,5,8,33,<br>35,36,38 37,39,40 | 3 P01946,P02091,Q9QWN8                                                          |
| 4351 | 1,3,6,7,34, 2,4,5,8,33,<br>35,36,39 37,38,40 | 0                                                                               |
| 4352 | 1,3,6,7,34, 2,4,5,8,33,<br>35,36,40 37,38,39 | 0                                                                               |
| 4353 | 1,3,6,7,34, 2,4,5,8,33,<br>35,37,38 36,39,40 | 2 P01946,P02091                                                                 |
| 4354 | 1,3,6,7,34, 2,4,5,8,33,<br>35,37,39 36,38,40 | 0                                                                               |
| 4355 | 1,3,6,7,34, 2,4,5,8,33,<br>35,37,40 36,38,39 | 2 P19132,Q9QW07                                                                 |
| 4356 | 1,3,6,7,34, 2,4,5,8,33,<br>35,38,39 36,37,40 | 2 P01946,P02091                                                                 |
| 4357 | 1,3,6,7,34, 2,4,5,8,33,<br>35,38,40 36,37,39 | 3 P01946,P02091,Q62812                                                          |

|      |                                              |                                                           |
|------|----------------------------------------------|-----------------------------------------------------------|
| 4358 | 1,3,6,7,34, 2,4,5,8,33,<br>35,39,40 36,37,38 | 0                                                         |
| 4359 | 1,3,6,7,34, 2,4,5,8,33,<br>36,37,38 35,39,40 | 5 P00774,P01835,P01946,P02091,P09656                      |
| 4360 | 1,3,6,7,34, 2,4,5,8,33,<br>36,37,39 35,38,40 | 2 P70549,Q62635                                           |
| 4361 | 1,3,6,7,34, 2,4,5,8,33,<br>36,37,40 35,38,39 | 3 P01835,P70549,Q9QW07                                    |
| 4362 | 1,3,6,7,34, 2,4,5,8,33,<br>36,38,39 35,37,40 | 2 P01946,P02091                                           |
| 4363 | 1,3,6,7,34, 2,4,5,8,33,<br>36,38,40 35,37,39 | 3 P01946,P02091,Q9QWN8                                    |
| 4364 | 1,3,6,7,34, 2,4,5,8,33,<br>36,39,40 35,37,38 | 0                                                         |
| 4365 | 1,3,6,7,34, 2,4,5,8,33,<br>37,38,39 35,36,40 | 4 P01835,P01946,P02091,Q6AY61                             |
| 4366 | 1,3,6,7,34, 2,4,5,8,33,<br>37,38,40 35,36,39 | 8 P01835,P01946,P02091,P20767,P23739,P49134,Q62714,Q6AY61 |
| 4367 | 1,3,6,7,34, 2,4,5,8,33,<br>37,39,40 35,36,38 | 3 P01835,P21674,P49134                                    |
| 4368 | 1,3,6,7,34, 2,4,5,8,33,<br>38,39,40 35,36,37 | 5 F1M3L7,P01946,P02091,P02770,P51740                      |
| 4369 | 1,3,6,7,35, 2,4,5,8,33,<br>36,37,38 34,39,40 | 4 P09656,P19218,P20762,P70549                             |
| 4370 | 1,3,6,7,35, 2,4,5,8,33,<br>36,37,39 34,38,40 | 3 P01039,P09656,P70549                                    |
| 4371 | 1,3,6,7,35, 2,4,5,8,33,<br>36,37,40 34,38,39 | 5 P02793;Q7TP54,P09656,P19132,P20762,P70549               |
| 4372 | 1,3,6,7,35, 2,4,5,8,33,<br>36,38,39 34,37,40 | 0                                                         |
| 4373 | 1,3,6,7,35, 2,4,5,8,33,<br>36,38,40 34,37,39 | 4 P02793;Q7TP54,P20762,Q62812,Q9QWN8                      |
| 4374 | 1,3,6,7,35, 2,4,5,8,33,<br>36,39,40 34,37,38 | 2 P06760,P70549                                           |
| 4375 | 1,3,6,7,35, 2,4,5,8,33,<br>37,38,39 34,36,40 | 0                                                         |
| 4376 | 1,3,6,7,35, 2,4,5,8,33,<br>37,38,40 34,36,39 | 1 P20762                                                  |
| 4377 | 1,3,6,7,35, 2,4,5,8,33,<br>37,39,40 34,36,38 | 1 P70549                                                  |



|      |                                              |                                                                                 |
|------|----------------------------------------------|---------------------------------------------------------------------------------|
| 4378 | 1,3,6,7,35, 2,4,5,8,33,<br>38,39,40 34,36,37 | 3 P06760,P51740,Q63751                                                          |
| 4379 | 1,3,6,7,36, 2,4,5,8,33,<br>37,38,39 34,35,40 | 3 P01835,P09656,P70549                                                          |
| 4380 | 1,3,6,7,36, 2,4,5,8,33,<br>37,38,40 34,35,39 | 7 P01835,P09656,P19629,P20762,P25809,P70549,Q9Z0V6                              |
| 4381 | 1,3,6,7,36, 2,4,5,8,33,<br>37,39,40 34,35,38 | 6 P01835,P09656,P19629,P25809,P70549,P97829                                     |
| 4382 | 1,3,6,7,36, 2,4,5,8,33,<br>38,39,40 34,35,37 | 3 P25809,P51740,P80020                                                          |
| 4383 | 1,3,6,7,37, 2,4,5,8,33,<br>38,39,40 34,35,36 | 6 D3ZUC6,P01835,P02770,P51740,Q5QE79,Q9QX74                                     |
| 4384 | 1,3,6,8,33, 2,4,5,7,37,<br>34,35,36 38,39,40 | 5 O89117,P08494,P08649,P08721,Q6PCU2                                            |
| 4385 | 1,3,6,8,33, 2,4,5,7,36,<br>34,35,37 38,39,40 | 1 O89117                                                                        |
| 4386 | 1,3,6,8,33, 2,4,5,7,36,<br>34,35,38 37,39,40 | 3 O89117,P01946,P02091                                                          |
| 4387 | 1,3,6,8,33, 2,4,5,7,36,<br>34,35,39 37,38,40 | 1 P02651                                                                        |
| 4388 | 1,3,6,8,33, 2,4,5,7,36,<br>34,35,40 37,38,39 | 2 O89117,P15399                                                                 |
| 4389 | 1,3,6,8,33, 2,4,5,7,35,<br>34,36,37 38,39,40 | 11 O89117,P00774,P08649,P08723,P09656,P13432,P55091,P70549,P98089,Q62635,Q9JI85 |
| 4390 | 1,3,6,8,33, 2,4,5,7,35,<br>34,36,38 37,39,40 | 5 O89117,P01946,P02091,P02625,P08649                                            |
| 4391 | 1,3,6,8,33, 2,4,5,7,35,<br>34,36,39 37,38,40 | 3 P02651,P08494,P08649                                                          |
| 4392 | 1,3,6,8,33, 2,4,5,7,35,<br>34,36,40 37,38,39 | 5 P01681,P08494,P08649,P13432,P15399                                            |
| 4393 | 1,3,6,8,33, 2,4,5,7,35,<br>34,37,38 36,39,40 | 4 O89117,P01946,P02091,Q6IG05                                                   |
| 4394 | 1,3,6,8,33, 2,4,5,7,35,<br>34,37,39 36,38,40 | 3 P02793;Q7TP54,P21674,Q9QWN8                                                   |
| 4395 | 1,3,6,8,33, 2,4,5,7,35,<br>34,37,40 36,38,39 | 4 P13432,P15399,P21674,Q9QW07                                                   |
| 4396 | 1,3,6,8,33, 2,4,5,7,35,<br>34,38,39 36,37,40 | 4 P01946,P02091,P02793;Q7TP54,P19132                                            |
| 4397 | 1,3,6,8,33, 2,4,5,7,35,<br>34,38,40 36,37,39 | 4 P01946,P02091,P15399,P97580                                                   |

|      |                                              |                                             |
|------|----------------------------------------------|---------------------------------------------|
| 4398 | 1,3,6,8,33, 2,4,5,7,35,<br>34,39,40 36,37,38 | 4 P02651,P15399,P21674,P97580               |
| 4399 | 1,3,6,8,33, 2,4,5,7,34,<br>35,36,37 38,39,40 | 4 P09656,P50116,P55091,P70549               |
| 4400 | 1,3,6,8,33, 2,4,5,7,34,<br>35,36,38 37,39,40 | 1 O70417                                    |
| 4401 | 1,3,6,8,33, 2,4,5,7,34,<br>35,36,39 37,38,40 | 5 P01681,P62804,P70549,Q4KLZ6,Q6AY61        |
| 4402 | 1,3,6,8,33, 2,4,5,7,34,<br>35,36,40 37,38,39 | 2 P01681,P70549                             |
| 4403 | 1,3,6,8,33, 2,4,5,7,34,<br>35,37,38 36,39,40 | 0                                           |
| 4404 | 1,3,6,8,33, 2,4,5,7,34,<br>35,37,39 36,38,40 | 3 P50116,P70549,Q4KLZ6                      |
| 4405 | 1,3,6,8,33, 2,4,5,7,34,<br>35,37,40 36,38,39 | 2 P70549,Q9QW07                             |
| 4406 | 1,3,6,8,33, 2,4,5,7,34,<br>35,38,39 36,37,40 | 0                                           |
| 4407 | 1,3,6,8,33, 2,4,5,7,34,<br>35,38,40 36,37,39 | 1 P63029                                    |
| 4408 | 1,3,6,8,33, 2,4,5,7,34,<br>35,39,40 36,37,38 | 2 P62804,Q4KLZ6                             |
| 4409 | 1,3,6,8,33, 2,4,5,7,34,<br>36,37,38 35,39,40 | 2 P09656,P70549                             |
| 4410 | 1,3,6,8,33, 2,4,5,7,34,<br>36,37,39 35,38,40 | 2 P09656,P70549                             |
| 4411 | 1,3,6,8,33, 2,4,5,7,34,<br>36,37,40 35,38,39 | 6 P01681,P09656,P13432,P19629,P70549,Q9QW07 |
| 4412 | 1,3,6,8,33, 2,4,5,7,34,<br>36,38,39 35,37,40 | 0                                           |
| 4413 | 1,3,6,8,33, 2,4,5,7,34,<br>36,38,40 35,37,39 | 1 P01681                                    |
| 4414 | 1,3,6,8,33, 2,4,5,7,34,<br>36,39,40 35,37,38 | 3 P01681,P70549,Q9R168                      |
| 4415 | 1,3,6,8,33, 2,4,5,7,34,<br>37,38,39 35,36,40 | 0                                           |
| 4416 | 1,3,6,8,33, 2,4,5,7,34,<br>37,38,40 35,36,39 | 3 Q62714,Q9QW07,Q9Z1F2                      |
| 4417 | 1,3,6,8,33, 2,4,5,7,34,<br>37,39,40 35,36,38 | 4 P21674,P70549,Q9QW07,Q9QWN8               |

|      |                                              |                                                    |
|------|----------------------------------------------|----------------------------------------------------|
| 4418 | 1,3,6,8,33, 2,4,5,7,34,<br>38,39,40 35,36,37 | 2 P25031,P51740                                    |
| 4419 | 1,3,6,8,34, 2,4,5,7,33,<br>35,36,37 38,39,40 | 7 P01039,P09656,P39069,P50116,P55091,P70549,Q9JI85 |
| 4420 | 1,3,6,8,34, 2,4,5,7,33,<br>35,36,38 37,39,40 | 2 P01946,P02091                                    |
| 4421 | 1,3,6,8,34, 2,4,5,7,33,<br>35,36,39 37,38,40 | 1 P01039                                           |
| 4422 | 1,3,6,8,34, 2,4,5,7,33,<br>35,36,40 37,38,39 | 1 P15399                                           |
| 4423 | 1,3,6,8,34, 2,4,5,7,33,<br>35,37,38 36,39,40 | 2 P01946,P02091                                    |
| 4424 | 1,3,6,8,34, 2,4,5,7,33,<br>35,37,39 36,38,40 | 3 P01039,P50116,Q923V8                             |
| 4425 | 1,3,6,8,34, 2,4,5,7,33,<br>35,37,40 36,38,39 | 5 P13432,P15399,P50116,Q923V8,Q9QW07               |
| 4426 | 1,3,6,8,34, 2,4,5,7,33,<br>35,38,39 36,37,40 | 2 P01946,P02091                                    |
| 4427 | 1,3,6,8,34, 2,4,5,7,33,<br>35,38,40 36,37,39 | 5 P01946,P02091,P15399,P97580,Q30KJ2               |
| 4428 | 1,3,6,8,34, 2,4,5,7,33,<br>35,39,40 36,37,38 | 2 P15399,P97580                                    |
| 4429 | 1,3,6,8,34, 2,4,5,7,33,<br>36,37,38 35,39,40 | 3 P01946,P02091,P09656                             |
| 4430 | 1,3,6,8,34, 2,4,5,7,33,<br>36,37,39 35,38,40 | 2 P01039,P70549                                    |
| 4431 | 1,3,6,8,34, 2,4,5,7,33,<br>36,37,40 35,38,39 | 7 P13432,P15399,P19629,P49134,P70502,P70549,Q9QW07 |
| 4432 | 1,3,6,8,34, 2,4,5,7,33,<br>36,38,39 35,37,40 | 2 P01946,P02091                                    |
| 4433 | 1,3,6,8,34, 2,4,5,7,33,<br>36,38,40 35,37,39 | 4 P01946,P02091,P15399,P97580                      |
| 4434 | 1,3,6,8,34, 2,4,5,7,33,<br>36,39,40 35,37,38 | 2 P13432,P15399                                    |
| 4435 | 1,3,6,8,34, 2,4,5,7,33,<br>37,38,39 35,36,40 | 3 P01946,P02091,Q9EQS0                             |
| 4436 | 1,3,6,8,34, 2,4,5,7,33,<br>37,38,40 35,36,39 | 6 P01946,P02091,P15399,P49134,P97580,Q9QW07        |
| 4437 | 1,3,6,8,34, 2,4,5,7,33,<br>37,39,40 35,36,38 | 6 P13432,P15399,P21674,P49134,Q923V8,Q9QW07        |

|      |                                              |                                                                                               |
|------|----------------------------------------------|-----------------------------------------------------------------------------------------------|
| 4438 | 1,3,6,8,34, 2,4,5,7,33,<br>38,39,40 35,36,37 | 7 P01946,P02091,P15399,P51740,P97580,P97840,Q30KJ2                                            |
| 4439 | 1,3,6,8,35, 2,4,5,7,33,<br>36,37,38 34,39,40 | 4 P01039,P09656,P19218,P70549                                                                 |
| 4440 | 1,3,6,8,35, 2,4,5,7,33,<br>36,37,39 34,38,40 | 6 P01039,P09656,P50116,P70549,P80299,P97829                                                   |
| 4441 | 1,3,6,8,35, 2,4,5,7,33,<br>36,37,40 34,38,39 | 10 P09656,P19132,P50116,P70549,P80299,P82471,P97829,Q63556,Q6P6S4,Q9QW07                      |
| 4442 | 1,3,6,8,35, 2,4,5,7,33,<br>36,38,39 34,37,40 | 0                                                                                             |
| 4443 | 1,3,6,8,35, 2,4,5,7,33,<br>36,38,40 34,37,39 | 0                                                                                             |
| 4444 | 1,3,6,8,35, 2,4,5,7,33,<br>36,39,40 34,37,38 | 5 P50116,P54921,P70549,P80299,Q9R168                                                          |
| 4445 | 1,3,6,8,35, 2,4,5,7,33,<br>37,38,39 34,36,40 | 0                                                                                             |
| 4446 | 1,3,6,8,35, 2,4,5,7,33,<br>37,38,40 34,36,39 | 0                                                                                             |
| 4447 | 1,3,6,8,35, 2,4,5,7,33,<br>37,39,40 34,36,38 | 5 P50116,P70549,P80299,P82471,Q9R168                                                          |
| 4448 | 1,3,6,8,35, 2,4,5,7,33,<br>38,39,40 34,36,37 | 3 P51740,P54921,Q63751                                                                        |
| 4449 | 1,3,6,8,36, 2,4,5,7,33,<br>37,38,39 34,35,40 | 2 P09656,P70549                                                                               |
| 4450 | 1,3,6,8,36, 2,4,5,7,33,<br>37,38,40 34,35,39 | 5 P06911,P09656,P19629,P70549,Q5GRG2                                                          |
| 4451 | 1,3,6,8,36, 2,4,5,7,33,<br>37,39,40 34,35,38 | 9 P06911,P09656,P19629,P50116,P70549,P80299,P97829,Q6P6S4,Q9R168                              |
| 4452 | 1,3,6,8,36, 2,4,5,7,33,<br>38,39,40 34,35,37 | 4 P51740,P54921,P80020,Q9R168                                                                 |
| 4453 | 1,3,6,8,37, 2,4,5,7,33,<br>38,39,40 34,35,36 | 5 D3ZUC6,P51740,P80299,Q5I0D7,Q9R168                                                          |
| 4454 | 1,3,6,33,3 2,4,5,7,8,3<br>4,35,36,37 8,39,40 | 13 D4A5U3,O89117,P08721,P09656,P20762,P39069,P55091,P70549,P98089,Q4G075,Q62635,Q6PCU2,Q8CIZ5 |
| 4455 | 1,3,6,33,3 2,4,5,7,8,3<br>4,35,36,38 7,39,40 | 8 O89117,P01946,P02091,P08721,P20762,P22273,P63029,Q6PCU2                                     |
| 4456 | 1,3,6,33,3 2,4,5,7,8,3<br>4,35,36,39 7,38,40 | 3 P08494,P22006,Q6PCU2                                                                        |
| 4457 | 1,3,6,33,3 2,4,5,7,8,3<br>4,35,36,40 7,38,39 | 6 D4A5U3,P08494,P20762,Q4G075,Q6PCU2,Q9Z0J6                                                   |

|      |                                              |                                                           |
|------|----------------------------------------------|-----------------------------------------------------------|
| 4458 | 1,3,6,33,3 2,4,5,7,8,3<br>4,35,37,38 6,39,40 | 4 O89117,P01946,P02091,P20762                             |
| 4459 | 1,3,6,33,3 2,4,5,7,8,3<br>4,35,37,39 6,38,40 | 0                                                         |
| 4460 | 1,3,6,33,3 2,4,5,7,8,3<br>4,35,37,40 6,38,39 | 4 P20762,P70549,Q4G075,Q6PCU2                             |
| 4461 | 1,3,6,33,3 2,4,5,7,8,3<br>4,35,38,39 6,37,40 | 2 P01946,P02091                                           |
| 4462 | 1,3,6,33,3 2,4,5,7,8,3<br>4,35,38,40 6,37,39 | 5 P01946,P02091,P20762,P63029,Q06000                      |
| 4463 | 1,3,6,33,3 2,4,5,7,8,3<br>4,35,39,40 6,37,38 | 0                                                         |
| 4464 | 1,3,6,33,3 2,4,5,7,8,3<br>4,36,37,38 5,39,40 | 6 P00774,P01946,P02091,P09656,P20762,P70549               |
| 4465 | 1,3,6,33,3 2,4,5,7,8,3<br>4,36,37,39 5,38,40 | 5 P00774,P09656,P70549,P98089,Q62635                      |
| 4466 | 1,3,6,33,3 2,4,5,7,8,3<br>4,36,37,40 5,38,39 | 5 P20762,P70549,P98089,Q4G075,Q9Z0J6                      |
| 4467 | 1,3,6,33,3 2,4,5,7,8,3<br>4,36,38,39 5,37,40 | 3 P01946,P02091,Q99041                                    |
| 4468 | 1,3,6,33,3 2,4,5,7,8,3<br>4,36,38,40 5,37,39 | 5 P01946,P02091,P20762,P63029,Q9Z0J6                      |
| 4469 | 1,3,6,33,3 2,4,5,7,8,3<br>4,36,39,40 5,37,38 | 1 P19218                                                  |
| 4470 | 1,3,6,33,3 2,4,5,7,8,3<br>4,37,38,39 5,36,40 | 3 P01946,P02091,P02793;Q7TP54                             |
| 4471 | 1,3,6,33,3 2,4,5,7,8,3<br>4,37,38,40 5,36,39 | 5 P01946,P02091,P20762,Q62714,Q9Z1F2                      |
| 4472 | 1,3,6,33,3 2,4,5,7,8,3<br>4,37,39,40 5,36,38 | 2 P19218,P21674                                           |
| 4473 | 1,3,6,33,3 2,4,5,7,8,3<br>4,38,39,40 5,36,37 | 4 P01946,P02091,P51740,Q5I0D1                             |
| 4474 | 1,3,6,33,3 2,4,5,7,8,3<br>5,36,37,38 4,39,40 | 4 P09656,P20762,P70549,Q9Z0V6                             |
| 4475 | 1,3,6,33,3 2,4,5,7,8,3<br>5,36,37,39 4,38,40 | 5 P09656,P50116,P62804,P70549,Q4G075                      |
| 4476 | 1,3,6,33,3 2,4,5,7,8,3<br>5,36,37,40 4,38,39 | 8 D4A5U3,P09656,P20762,P70549,Q4G075,Q63618,Q9WTT6,Q9Z0V6 |
| 4477 | 1,3,6,33,3 2,4,5,7,8,3<br>5,36,38,39 4,37,40 | 2 P06760,P62804                                           |

|      |                                              |                                                           |
|------|----------------------------------------------|-----------------------------------------------------------|
| 4478 | 1,3,6,33,3 2,4,5,7,8,3<br>5,36,38,40 4,37,39 | 7 P06760,P20762,P62804,P63029,P70549,Q9WTT6,Q9Z0V6        |
| 4479 | 1,3,6,33,3 2,4,5,7,8,3<br>5,36,39,40 4,37,38 | 3 P06760,P62804,P70549                                    |
| 4480 | 1,3,6,33,3 2,4,5,7,8,3<br>5,37,38,39 4,36,40 | 0                                                         |
| 4481 | 1,3,6,33,3 2,4,5,7,8,3<br>5,37,38,40 4,36,39 | 6 P06760,P20762,P63029,P70549,Q9Z0V6,Q9Z1F2               |
| 4482 | 1,3,6,33,3 2,4,5,7,8,3<br>5,37,39,40 4,36,38 | 4 P06760,P62804,P70549,Q4G075                             |
| 4483 | 1,3,6,33,3 2,4,5,7,8,3<br>5,38,39,40 4,36,37 | 3 P06760,P51740,P62804                                    |
| 4484 | 1,3,6,33,3 2,4,5,7,8,3<br>6,37,38,39 4,35,40 | 2 P09656,P70549                                           |
| 4485 | 1,3,6,33,3 2,4,5,7,8,3<br>6,37,38,40 4,35,39 | 8 P09656,P19629,P20762,P25809,P70549,Q9WTT6,Q9Z0V6,Q9Z1F2 |
| 4486 | 1,3,6,33,3 2,4,5,7,8,3<br>6,37,39,40 4,35,38 | 5 P09656,P19629,P25809,P70549,Q4G075                      |
| 4487 | 1,3,6,33,3 2,4,5,7,8,3<br>6,38,39,40 4,35,37 | 3 P06760,P25809,P51740                                    |
| 4488 | 1,3,6,33,3 2,4,5,7,8,3<br>7,38,39,40 4,35,36 | 5 P06760,P48199,P51740,P70549,Q9Z1F2                      |
| 4489 | 1,3,6,34,3 2,4,5,7,8,3<br>5,36,37,38 3,39,40 | 7 D3ZTE0,P01946,P02091,P09656,P20762,P39069,P70549        |
| 4490 | 1,3,6,34,3 2,4,5,7,8,3<br>5,36,37,39 3,38,40 | 4 P01039,P09656,P50116,P70549                             |
| 4491 | 1,3,6,34,3 2,4,5,7,8,3<br>5,36,37,40 3,38,39 | 8 P19132,P20762,P39069,P50115,P50116,P70549,Q4G075,Q63556 |
| 4492 | 1,3,6,34,3 2,4,5,7,8,3<br>5,36,38,39 3,37,40 | 3 P01946,P02091,P22273                                    |
| 4493 | 1,3,6,34,3 2,4,5,7,8,3<br>5,36,38,40 3,37,39 | 3 P01946,P02091,P20762                                    |
| 4494 | 1,3,6,34,3 2,4,5,7,8,3<br>5,36,39,40 3,37,38 | 1 P70549                                                  |
| 4495 | 1,3,6,34,3 2,4,5,7,8,3<br>5,37,38,39 3,36,40 | 2 P01946,P02091                                           |
| 4496 | 1,3,6,34,3 2,4,5,7,8,3<br>5,37,38,40 3,36,39 | 3 P01946,P02091,P20762                                    |
| 4497 | 1,3,6,34,3 2,4,5,7,8,3<br>5,37,39,40 3,36,38 | 4 P50115,P50116,P70549,Q4G075                             |

|      |                                              |                                                                          |
|------|----------------------------------------------|--------------------------------------------------------------------------|
| 4498 | 1,3,6,34,3 2,4,5,7,8,3<br>5,38,39,40 3,36,37 | 5 P01946,P02091,P06760,P51740,Q63751                                     |
| 4499 | 1,3,6,34,3 2,4,5,7,8,3<br>6,37,38,39 3,35,40 | 4 P01946,P02091,P09656,P70549                                            |
| 4500 | 1,3,6,34,3 2,4,5,7,8,3<br>6,37,38,40 3,35,39 | 5 P01946,P02091,P19629,P20762,P70549                                     |
| 4501 | 1,3,6,34,3 2,4,5,7,8,3<br>6,37,39,40 3,35,38 | 3 P19629,P70549,Q4G075                                                   |
| 4502 | 1,3,6,34,3 2,4,5,7,8,3<br>6,38,39,40 3,35,37 | 3 P01946,P02091,P51740                                                   |
| 4503 | 1,3,6,34,3 2,4,5,7,8,3<br>7,38,39,40 3,35,36 | 3 P01946,P02091,P51740                                                   |
| 4504 | 1,3,6,35,3 2,4,5,7,8,3<br>6,37,38,39 3,34,40 | 2 P09656,P70549                                                          |
| 4505 | 1,3,6,35,3 2,4,5,7,8,3<br>6,37,38,40 3,34,39 | 7 D3ZTE0,P06760,P09656,P20762,P70549,Q9QX74,Q9Z0V6                       |
| 4506 | 1,3,6,35,3 2,4,5,7,8,3<br>6,37,39,40 3,34,38 | 7 P06760,P09656,P19629,P50116,P70549,P80299,Q4G075                       |
| 4507 | 1,3,6,35,3 2,4,5,7,8,3<br>6,38,39,40 3,34,37 | 5 P06760,P51740,P70549,Q63751,Q9QX74                                     |
| 4508 | 1,3,6,35,3 2,4,5,7,8,3<br>7,38,39,40 3,34,36 | 5 P06760,P51740,P70549,Q63751,Q9QX74                                     |
| 4509 | 1,3,6,36,3 2,4,5,7,8,3<br>7,38,39,40 3,34,35 | 7 P06760,P09656,P19629,P25809,P51740,P70549,Q9QX74                       |
| 4510 | 1,3,7,8,33, 2,4,5,6,37,<br>34,35,36 38,39,40 | 7 O89117,P01681,P08721,P51740,P55091,Q6PCU2,Q9QX74                       |
| 4511 | 1,3,7,8,33, 2,4,5,6,36,<br>34,35,37 38,39,40 | 5 P36860,P51740,P55091,Q923V8,Q9QX74                                     |
| 4512 | 1,3,7,8,33, 2,4,5,6,36,<br>34,35,38 37,39,40 | 3 O70417,P02091,P35280                                                   |
| 4513 | 1,3,7,8,33, 2,4,5,6,36,<br>34,35,39 37,38,40 | 5 P02651,Q4KLZ6,Q5RKI1,Q9QX74,Q9Z0V6                                     |
| 4514 | 1,3,7,8,33, 2,4,5,6,36,<br>34,35,40 37,38,39 | 0                                                                        |
| 4515 | 1,3,7,8,33, 2,4,5,6,35,<br>34,36,37 38,39,40 | 10 P00774,P08723,P47967,P51740,P55091,P98089,Q5EGZ1,Q62635,Q6P6R2,Q9QX74 |
| 4516 | 1,3,7,8,33, 2,4,5,6,35,<br>34,36,38 37,39,40 | 6 O70417,P02091,P02625,P35280,Q64093,Q9QX74                              |
| 4517 | 1,3,7,8,33, 2,4,5,6,35,<br>34,36,39 37,38,40 | 4 P02651,Q5RKI1,Q64093,Q9QX74                                            |

|      |                                              |    |                                                                                         |
|------|----------------------------------------------|----|-----------------------------------------------------------------------------------------|
| 4518 | 1,3,7,8,33, 2,4,5,6,35,<br>34,36,40 37,38,39 | 1  | P01681                                                                                  |
| 4519 | 1,3,7,8,33, 2,4,5,6,35,<br>34,37,38 36,39,40 | 5  | P02091,P35280,Q64093,Q6IG05,Q9EQS0                                                      |
| 4520 | 1,3,7,8,33, 2,4,5,6,35,<br>34,37,39 36,38,40 | 6  | P02793;Q7TP54,P21674,Q5RKI1,Q64093,Q6AYQ8,Q923V8                                        |
| 4521 | 1,3,7,8,33, 2,4,5,6,35,<br>34,37,40 36,38,39 | 5  | P13432,P21674,P24368,Q923V8,Q9QW07                                                      |
| 4522 | 1,3,7,8,33, 2,4,5,6,35,<br>34,38,39 36,37,40 | 11 | P02091,P02651,P02770,P02793;Q7TP54,P07174,P19132,P35280,P46720,Q5RKI1,Q64093,Q9EQ<br>S0 |
| 4523 | 1,3,7,8,33, 2,4,5,6,35,<br>34,38,40 36,37,39 | 3  | P02091,P35280,Q64093                                                                    |
| 4524 | 1,3,7,8,33, 2,4,5,6,35,<br>34,39,40 36,37,38 | 4  | P02651,P21674,Q5RKI1,Q64093                                                             |
| 4525 | 1,3,7,8,33, 2,4,5,6,34,<br>35,36,37 38,39,40 | 7  | P01039,P08723,P47967,P51740,P55091,P70549,Q4KLZ6                                        |
| 4526 | 1,3,7,8,33, 2,4,5,6,34,<br>35,36,38 37,39,40 | 3  | O70417,P01681,P35280                                                                    |
| 4527 | 1,3,7,8,33, 2,4,5,6,34,<br>35,36,39 37,38,40 | 3  | P01681,Q4KLZ6,Q5RKI1                                                                    |
| 4528 | 1,3,7,8,33, 2,4,5,6,34,<br>35,36,40 37,38,39 | 2  | P01681,Q4KLZ6                                                                           |
| 4529 | 1,3,7,8,33, 2,4,5,6,34,<br>35,37,38 36,39,40 | 1  | P35280                                                                                  |
| 4530 | 1,3,7,8,33, 2,4,5,6,34,<br>35,37,39 36,38,40 | 2  | Q4KLZ6,Q5RKI1                                                                           |
| 4531 | 1,3,7,8,33, 2,4,5,6,34,<br>35,37,40 36,38,39 | 2  | Q4KLZ6,Q9QW07                                                                           |
| 4532 | 1,3,7,8,33, 2,4,5,6,34,<br>35,38,39 36,37,40 | 6  | P02770,P07174,P11883,P35280,Q4KLZ6,Q5RKI1                                               |
| 4533 | 1,3,7,8,33, 2,4,5,6,34,<br>35,38,40 36,37,39 | 2  | O70417,P35280                                                                           |
| 4534 | 1,3,7,8,33, 2,4,5,6,34,<br>35,39,40 36,37,38 | 3  | P01681,Q4KLZ6,Q5RKI1                                                                    |
| 4535 | 1,3,7,8,33, 2,4,5,6,34,<br>36,37,38 35,39,40 | 2  | P08723,P35280                                                                           |
| 4536 | 1,3,7,8,33, 2,4,5,6,34,<br>36,37,39 35,38,40 | 4  | P08723,Q4KLZ6,Q5RKI1,Q64093                                                             |
| 4537 | 1,3,7,8,33, 2,4,5,6,34,<br>36,37,40 35,38,39 | 5  | P01681,P08723,P30120,P70549,Q9QW07                                                      |



|      |                                              |                                                    |
|------|----------------------------------------------|----------------------------------------------------|
| 4538 | 1,3,7,8,33, 2,4,5,6,34,<br>36,38,39 35,37,40 | 3 P35280,Q5RKI1,Q64093                             |
| 4539 | 1,3,7,8,33, 2,4,5,6,34,<br>36,38,40 35,37,39 | 3 O70417,P01681,P35280                             |
| 4540 | 1,3,7,8,33, 2,4,5,6,34,<br>36,39,40 35,37,38 | 4 P01681,Q4KLZ6,Q5RKI1,Q64093                      |
| 4541 | 1,3,7,8,33, 2,4,5,6,34,<br>37,38,39 35,36,40 | 7 P02770,P07174,P21674,P35280,Q5RKI1,Q64093,Q9EQS0 |
| 4542 | 1,3,7,8,33, 2,4,5,6,34,<br>37,38,40 35,36,39 | 3 P35280,Q62714,Q9Z1F2                             |
| 4543 | 1,3,7,8,33, 2,4,5,6,34,<br>37,39,40 35,36,38 | 5 P21674,Q4KLZ6,Q5RKI1,Q6AYQ8,Q9QWN8               |
| 4544 | 1,3,7,8,33, 2,4,5,6,34,<br>38,39,40 35,36,37 | 7 P02770,P11883,P21674,P25236,P35280,Q5RKI1,Q64093 |
| 4545 | 1,3,7,8,34, 2,4,5,6,33,<br>35,36,37 38,39,40 | 5 P01039,P25031,P47967,P51740,P55091               |
| 4546 | 1,3,7,8,34, 2,4,5,6,33,<br>35,36,38 37,39,40 | 5 D3ZTX0,O70417,P01039,P02091,P35280               |
| 4547 | 1,3,7,8,34, 2,4,5,6,33,<br>35,36,39 37,38,40 | 2 P01039,Q9Z1F2                                    |
| 4548 | 1,3,7,8,34, 2,4,5,6,33,<br>35,36,40 37,38,39 | 0                                                  |
| 4549 | 1,3,7,8,34, 2,4,5,6,33,<br>35,37,38 36,39,40 | 5 P01039,P02091,P35280,P36860,Q9EQS0               |
| 4550 | 1,3,7,8,34, 2,4,5,6,33,<br>35,37,39 36,38,40 | 3 P01039,P36860,Q923V8                             |
| 4551 | 1,3,7,8,34, 2,4,5,6,33,<br>35,37,40 36,38,39 | 2 P36860,Q923V8                                    |
| 4552 | 1,3,7,8,34, 2,4,5,6,33,<br>35,38,39 36,37,40 | 5 P02091,P11883,P35280,Q9EQS0,Q9Z0V6               |
| 4553 | 1,3,7,8,34, 2,4,5,6,33,<br>35,38,40 36,37,39 | 4 D3ZTX0,P02091,P35280,P97580                      |
| 4554 | 1,3,7,8,34, 2,4,5,6,33,<br>35,39,40 36,37,38 | 1 P36860                                           |
| 4555 | 1,3,7,8,34, 2,4,5,6,33,<br>36,37,38 35,39,40 | 6 P01039,P02091,P35280,Q64093,Q811M5,Q9EQS0        |
| 4556 | 1,3,7,8,34, 2,4,5,6,33,<br>36,37,39 35,38,40 | 4 P01039,Q64093,Q6AY41,Q6P6R2                      |
| 4557 | 1,3,7,8,34, 2,4,5,6,33,<br>36,37,40 35,38,39 | 5 P13432,P49134,P70502,Q811M5,Q923V8               |

|      |                                              |                                                           |
|------|----------------------------------------------|-----------------------------------------------------------|
| 4558 | 1,3,7,8,34, 2,4,5,6,33,<br>36,38,39 35,37,40 | 6 P01946,P02091,P35280,Q64093,Q6AY41,Q9EQS0               |
| 4559 | 1,3,7,8,34, 2,4,5,6,33,<br>36,38,40 35,37,39 | 5 D3ZTX0,P02091,P35280,Q64093,Q811M5                      |
| 4560 | 1,3,7,8,34, 2,4,5,6,33,<br>36,39,40 35,37,38 | 1 Q64093                                                  |
| 4561 | 1,3,7,8,34, 2,4,5,6,33,<br>37,38,39 35,36,40 | 6 P02091,P02770,P35280,P49134,Q64093,Q9EQS0               |
| 4562 | 1,3,7,8,34, 2,4,5,6,33,<br>37,38,40 35,36,39 | 6 P02091,P35280,P49134,Q811M5,Q923V8,Q9EQS0               |
| 4563 | 1,3,7,8,34, 2,4,5,6,33,<br>37,39,40 35,36,38 | 5 P21674,P49134,Q05175,Q64093,Q923V8                      |
| 4564 | 1,3,7,8,34, 2,4,5,6,33,<br>38,39,40 35,36,37 | 8 D3ZTX0,P02091,P02770,P11883,P35280,P97580,Q64093,Q9EQS0 |
| 4565 | 1,3,7,8,35, 2,4,5,6,33,<br>36,37,38 34,39,40 | 3 P01039,P19218,P35280                                    |
| 4566 | 1,3,7,8,35, 2,4,5,6,33,<br>36,37,39 34,38,40 | 5 P01039,P70549,P80299,P97829,Q4KLZ6                      |
| 4567 | 1,3,7,8,35, 2,4,5,6,33,<br>36,37,40 34,38,39 | 4 P19132,P70549,P80299,P97829                             |
| 4568 | 1,3,7,8,35, 2,4,5,6,33,<br>36,38,39 34,37,40 | 2 P01039,P35280                                           |
| 4569 | 1,3,7,8,35, 2,4,5,6,33,<br>36,38,40 34,37,39 | 3 D3ZTX0,O70417,P35280                                    |
| 4570 | 1,3,7,8,35, 2,4,5,6,33,<br>36,39,40 34,37,38 | 2 P97829,Q4KLZ6                                           |
| 4571 | 1,3,7,8,35, 2,4,5,6,33,<br>37,38,39 34,36,40 | 4 P01039,P11883,P35280,Q9EQS0                             |
| 4572 | 1,3,7,8,35, 2,4,5,6,33,<br>37,38,40 34,36,39 | 2 P08649,P35280                                           |
| 4573 | 1,3,7,8,35, 2,4,5,6,33,<br>37,39,40 34,36,38 | 5 D3ZUC6,P80299,P97829,Q4KLZ6,Q923V8                      |
| 4574 | 1,3,7,8,35, 2,4,5,6,33,<br>38,39,40 34,36,37 | 8 D3ZTX0,O55145,P02770,P11883,P16636,P35280,Q5I0D7,Q63751 |
| 4575 | 1,3,7,8,36, 2,4,5,6,33,<br>37,38,39 34,35,40 | 5 D3ZUC6,P01039,P35280,Q64093,Q9EQS0                      |
| 4576 | 1,3,7,8,36, 2,4,5,6,33,<br>37,38,40 34,35,39 | 3 D3ZUC6,P35280,Q811M5                                    |
| 4577 | 1,3,7,8,36, 2,4,5,6,33,<br>37,39,40 34,35,38 | 6 D3ZUC6,P19629,P70549,P80299,P97829,Q812E4               |

|      |                                              |    |                                                                                         |
|------|----------------------------------------------|----|-----------------------------------------------------------------------------------------|
| 4578 | 1,3,7,8,36, 2,4,5,6,33,<br>38,39,40 34,35,37 | 4  | D3ZUC6,P35280,P80020,Q64093                                                             |
| 4579 | 1,3,7,8,37, 2,4,5,6,33,<br>38,39,40 34,35,36 | 10 | D3ZUC6,P02770,P11883,P21674,P35280,Q05175,Q5I0D7,Q5QE79,Q64093,Q9EQS0                   |
| 4580 | 1,3,7,33,3 2,4,5,6,8,3<br>4,35,36,37 8,39,40 | 12 | D4A5U3,P08721,P20762,P25031,P47967,P51740,P54921,P55091,P98089,Q62635,Q6PCU2,Q8CI<br>Z5 |
| 4581 | 1,3,7,33,3 2,4,5,6,8,3<br>4,35,36,38 7,39,40 | 2  | P02091,P08721                                                                           |
| 4582 | 1,3,7,33,3 2,4,5,6,8,3<br>4,35,36,39 7,38,40 | 4  | P08721,P25031,Q5RKI1,Q6PCU2                                                             |
| 4583 | 1,3,7,33,3 2,4,5,6,8,3<br>4,35,36,40 7,38,39 | 4  | P08721,P20762,Q6PCU2,Q9Z0J6                                                             |
| 4584 | 1,3,7,33,3 2,4,5,6,8,3<br>4,35,37,38 6,39,40 | 3  | B0BNN3,P02091,P54921                                                                    |
| 4585 | 1,3,7,33,3 2,4,5,6,8,3<br>4,35,37,39 6,38,40 | 2  | P25031,Q5RKI1                                                                           |
| 4586 | 1,3,7,33,3 2,4,5,6,8,3<br>4,35,37,40 6,38,39 | 1  | P20762                                                                                  |
| 4587 | 1,3,7,33,3 2,4,5,6,8,3<br>4,35,38,39 6,37,40 | 4  | P02091,P02770,Q5RKI1,Q64093                                                             |
| 4588 | 1,3,7,33,3 2,4,5,6,8,3<br>4,35,38,40 6,37,39 | 1  | P02091                                                                                  |
| 4589 | 1,3,7,33,3 2,4,5,6,8,3<br>4,35,39,40 6,37,38 | 2  | P19218,Q5RKI1                                                                           |
| 4590 | 1,3,7,33,3 2,4,5,6,8,3<br>4,36,37,38 5,39,40 | 6  | P00774,P02091,P20762,P54921,Q5EGZ1,Q64093                                               |
| 4591 | 1,3,7,33,3 2,4,5,6,8,3<br>4,36,37,39 5,38,40 | 6  | P00774,P25031,P98089,Q5RKI1,Q62635,Q64093                                               |
| 4592 | 1,3,7,33,3 2,4,5,6,8,3<br>4,36,37,40 5,38,39 | 3  | P20762,P98089,Q9Z0J6                                                                    |
| 4593 | 1,3,7,33,3 2,4,5,6,8,3<br>4,36,38,39 5,37,40 | 6  | P01946,P02091,P82471,Q5RKI1,Q64093,Q99041                                               |
| 4594 | 1,3,7,33,3 2,4,5,6,8,3<br>4,36,38,40 5,37,39 | 4  | P02091,P20762,Q64093,Q9Z0J6                                                             |
| 4595 | 1,3,7,33,3 2,4,5,6,8,3<br>4,36,39,40 5,37,38 | 3  | P19218,Q5RKI1,Q64093                                                                    |
| 4596 | 1,3,7,33,3 2,4,5,6,8,3<br>4,37,38,39 5,36,40 | 6  | P02091,P02770,P02793,Q7TP54,P12346,Q5RKI1,Q64093                                        |
| 4597 | 1,3,7,33,3 2,4,5,6,8,3<br>4,37,38,40 5,36,39 | 6  | P02091,P20762,Q62714,Q64093,Q6AY61,Q9Z1F2                                               |

|      |                                              |                                                                  |
|------|----------------------------------------------|------------------------------------------------------------------|
| 4598 | 1,3,7,33,3 2,4,5,6,8,3<br>4,37,39,40 5,36,38 | 5 P19218,P21674,Q5RKI1,Q64093,Q6AYQ8                             |
| 4599 | 1,3,7,33,3 2,4,5,6,8,3<br>4,38,39,40 5,36,37 | 9 F1M3L7,P02091,P02770,P19132,P19218,P46720,P48199,Q5RKI1,Q64093 |
| 4600 | 1,3,7,33,3 2,4,5,6,8,3<br>5,36,37,38 4,39,40 | 1 P20762                                                         |
| 4601 | 1,3,7,33,3 2,4,5,6,8,3<br>5,36,37,39 4,38,40 | 4 P25031,P70549,Q4KLZ6,Q5RKI1                                    |
| 4602 | 1,3,7,33,3 2,4,5,6,8,3<br>5,36,37,40 4,38,39 | 2 P20762,P70549                                                  |
| 4603 | 1,3,7,33,3 2,4,5,6,8,3<br>5,36,38,39 4,37,40 | 1 Q5RKI1                                                         |
| 4604 | 1,3,7,33,3 2,4,5,6,8,3<br>5,36,38,40 4,37,39 | 1 P20762                                                         |
| 4605 | 1,3,7,33,3 2,4,5,6,8,3<br>5,36,39,40 4,37,38 | 3 P01681,Q4KLZ6,Q5RKI1                                           |
| 4606 | 1,3,7,33,3 2,4,5,6,8,3<br>5,37,38,39 4,36,40 | 3 P02770,P08649,Q5RKI1                                           |
| 4607 | 1,3,7,33,3 2,4,5,6,8,3<br>5,37,38,40 4,36,39 | 3 P08649,P20762,Q9Z1F2                                           |
| 4608 | 1,3,7,33,3 2,4,5,6,8,3<br>5,37,39,40 4,36,38 | 3 P08649,Q4KLZ6,Q5RKI1                                           |
| 4609 | 1,3,7,33,3 2,4,5,6,8,3<br>5,38,39,40 4,36,37 | 5 P02770,P08649,P48199,Q5RKI1,Q9JJ50                             |
| 4610 | 1,3,7,33,3 2,4,5,6,8,3<br>6,37,38,39 4,35,40 | 2 Q5RKI1,Q64093                                                  |
| 4611 | 1,3,7,33,3 2,4,5,6,8,3<br>6,37,38,40 4,35,39 | 3 P20762,P70549,Q9Z1F2                                           |
| 4612 | 1,3,7,33,3 2,4,5,6,8,3<br>6,37,39,40 4,35,38 | 4 P25809,P70549,Q5RKI1,Q64093                                    |
| 4613 | 1,3,7,33,3 2,4,5,6,8,3<br>6,38,39,40 4,35,37 | 4 P02770,P48199,Q5RKI1,Q64093                                    |
| 4614 | 1,3,7,33,3 2,4,5,6,8,3<br>7,38,39,40 4,35,36 | 7 P02770,P08649,P21674,P48199,Q5RKI1,Q64093,Q9Z1F2               |
| 4615 | 1,3,7,34,3 2,4,5,6,8,3<br>5,36,37,38 3,39,40 | 4 O54858,P01039,P02091,P25031                                    |
| 4616 | 1,3,7,34,3 2,4,5,6,8,3<br>5,36,37,39 3,38,40 | 3 O54858,P01039,P25031                                           |
| 4617 | 1,3,7,34,3 2,4,5,6,8,3<br>5,36,37,40 3,38,39 | 2 P20762,P70549                                                  |

|      |                                              |    |                                                                       |
|------|----------------------------------------------|----|-----------------------------------------------------------------------|
| 4618 | 1,3,7,34,3 2,4,5,6,8,3<br>5,36,38,39 3,37,40 | 4  | D3ZTX0,P02091,P25031,Q64093                                           |
| 4619 | 1,3,7,34,3 2,4,5,6,8,3<br>5,36,38,40 3,37,39 | 2  | D3ZTX0,P02091                                                         |
| 4620 | 1,3,7,34,3 2,4,5,6,8,3<br>5,36,39,40 3,37,38 | 0  |                                                                       |
| 4621 | 1,3,7,34,3 2,4,5,6,8,3<br>5,37,38,39 3,36,40 | 6  | O54858,P02091,P16636,P25031,Q63751,Q9QZQ5                             |
| 4622 | 1,3,7,34,3 2,4,5,6,8,3<br>5,37,38,40 3,36,39 | 4  | D3ZTX0,P08649,P16636,Q9QZQ5                                           |
| 4623 | 1,3,7,34,3 2,4,5,6,8,3<br>5,37,39,40 3,36,38 | 2  | Q923V8,Q9QZQ5                                                         |
| 4624 | 1,3,7,34,3 2,4,5,6,8,3<br>5,38,39,40 3,36,37 | 6  | D3ZTX0,P02091,P08649,P16636,Q63751,Q9QZQ5                             |
| 4625 | 1,3,7,34,3 2,4,5,6,8,3<br>6,37,38,39 3,35,40 | 5  | O54858,P01946,P02091,P25031,Q64093                                    |
| 4626 | 1,3,7,34,3 2,4,5,6,8,3<br>6,37,38,40 3,35,39 | 4  | O54858,P02091,P20762,Q811M5                                           |
| 4627 | 1,3,7,34,3 2,4,5,6,8,3<br>6,37,39,40 3,35,38 | 3  | O54858,P70549,Q64093                                                  |
| 4628 | 1,3,7,34,3 2,4,5,6,8,3<br>6,38,39,40 3,35,37 | 4  | D3ZTX0,P01946,P02091,Q64093                                           |
| 4629 | 1,3,7,34,3 2,4,5,6,8,3<br>7,38,39,40 3,35,36 | 7  | O54858,P02091,P02770,P08649,Q64093,Q6AY61,Q9QZQ5                      |
| 4630 | 1,3,7,35,3 2,4,5,6,8,3<br>6,37,38,39 3,34,40 | 5  | O54858,P01039,P25031,P70549,Q9QZQ5                                    |
| 4631 | 1,3,7,35,3 2,4,5,6,8,3<br>6,37,38,40 3,34,39 | 5  | O54858,P20762,P70549,Q63532,Q9QZQ5                                    |
| 4632 | 1,3,7,35,3 2,4,5,6,8,3<br>6,37,39,40 3,34,38 | 2  | O54858,P70549                                                         |
| 4633 | 1,3,7,35,3 2,4,5,6,8,3<br>6,38,39,40 3,34,37 | 5  | D3ZTX0,O54858,O55004,Q63751,Q9QZQ5                                    |
| 4634 | 1,3,7,35,3 2,4,5,6,8,3<br>7,38,39,40 3,34,36 | 10 | O54858,O55004,P02770,P08649,P16636,Q5I0D7,Q63751,Q99PP0,Q9QW30,Q9QZQ5 |
| 4635 | 1,3,7,36,3 2,4,5,6,8,3<br>7,38,39,40 3,34,35 | 6  | O54858,P19629,P70549,Q5I0D7,Q64093,Q9QZQ5                             |
| 4636 | 1,3,8,33,3 2,4,5,6,7,3<br>4,35,36,37 8,39,40 | 8  | O89117,P01039,P50116,P51740,P55091,Q5QE79,Q6PCU2,Q9Z0J6               |
| 4637 | 1,3,8,33,3 2,4,5,6,7,3<br>4,35,36,38 7,39,40 | 4  | P00762,P02091,P02625,Q9Z0J6                                           |

|      |                                              |                                                           |
|------|----------------------------------------------|-----------------------------------------------------------|
| 4638 | 1,3,8,33,3 2,4,5,6,7,3<br>4,35,36,39 7,38,40 | 5 P01681,P01835,P50116,Q6PCU2,Q9Z0J6                      |
| 4639 | 1,3,8,33,3 2,4,5,6,7,3<br>4,35,36,40 7,38,39 | 4 P01681,P50116,Q6PCU2,Q9Z0J6                             |
| 4640 | 1,3,8,33,3 2,4,5,6,7,3<br>4,35,37,38 6,39,40 | 2 B0BNN3,P02091                                           |
| 4641 | 1,3,8,33,3 2,4,5,6,7,3<br>4,35,37,39 6,38,40 | 3 P50116,Q923V8,Q9QWN8                                    |
| 4642 | 1,3,8,33,3 2,4,5,6,7,3<br>4,35,37,40 6,38,39 | 4 P13432,P50116,Q923V8,Q9Z0J6                             |
| 4643 | 1,3,8,33,3 2,4,5,6,7,3<br>4,35,38,39 6,37,40 | 3 P00762,P02091,P19132                                    |
| 4644 | 1,3,8,33,3 2,4,5,6,7,3<br>4,35,38,40 6,37,39 | 6 P00762,P02091,P15399,P63029,P97580,Q9Z0J6               |
| 4645 | 1,3,8,33,3 2,4,5,6,7,3<br>4,35,39,40 6,37,38 | 2 P50116,Q9Z0J6                                           |
| 4646 | 1,3,8,33,3 2,4,5,6,7,3<br>4,36,37,38 5,39,40 | 3 P02091,P02625,Q9Z0J6                                    |
| 4647 | 1,3,8,33,3 2,4,5,6,7,3<br>4,36,37,39 5,38,40 | 4 P50116,P98089,Q6P6R2,Q9Z0J6                             |
| 4648 | 1,3,8,33,3 2,4,5,6,7,3<br>4,36,37,40 5,38,39 | 7 P01681,P08723,P13432,P24368,P50116,P70549,Q9Z0J6        |
| 4649 | 1,3,8,33,3 2,4,5,6,7,3<br>4,36,38,39 5,37,40 | 8 P00762,P01946,P02091,P02625,P19132,Q64093,Q99041,Q9Z0J6 |
| 4650 | 1,3,8,33,3 2,4,5,6,7,3<br>4,36,38,40 5,37,39 | 6 P00762,P01681,P02091,P02625,P63029,Q9Z0J6               |
| 4651 | 1,3,8,33,3 2,4,5,6,7,3<br>4,36,39,40 5,37,38 | 4 P01681,P19218,Q64093,Q9Z0J6                             |
| 4652 | 1,3,8,33,3 2,4,5,6,7,3<br>4,37,38,39 5,36,40 | 6 P02091,P02793;Q7TP54,P19132,Q64093,Q9EQS0,Q9QWN8        |
| 4653 | 1,3,8,33,3 2,4,5,6,7,3<br>4,37,38,40 5,36,39 | 3 P02091,Q9Z0J6,Q9Z1F2                                    |
| 4654 | 1,3,8,33,3 2,4,5,6,7,3<br>4,37,39,40 5,36,38 | 6 P13432,P19218,P21674,P50116,Q923V8,Q9QWN8               |
| 4655 | 1,3,8,33,3 2,4,5,6,7,3<br>4,38,39,40 5,36,37 | 6 P02091,P15399,P19132,P97580,Q64093,Q6IFU7               |
| 4656 | 1,3,8,33,3 2,4,5,6,7,3<br>5,36,37,38 4,39,40 | 2 P70549,Q80WL1                                           |
| 4657 | 1,3,8,33,3 2,4,5,6,7,3<br>5,36,37,39 4,38,40 | 6 P01681,P50116,P70549,P80299,Q4KLZ6,Q80WL1               |

|      |                                              |                                             |
|------|----------------------------------------------|---------------------------------------------|
| 4658 | 1,3,8,33,3 2,4,5,6,7,3<br>5,36,37,40 4,38,39 | 6 P01681,P50116,P60905,P70549,P80299,Q80WL1 |
| 4659 | 1,3,8,33,3 2,4,5,6,7,3<br>5,36,38,39 4,37,40 | 2 P01681,Q80WL1                             |
| 4660 | 1,3,8,33,3 2,4,5,6,7,3<br>5,36,38,40 4,37,39 | 3 P01681,P63029,Q80WL1                      |
| 4661 | 1,3,8,33,3 2,4,5,6,7,3<br>5,36,39,40 4,37,38 | 4 P01681,P50116,Q4KLZ6,Q80WL1               |
| 4662 | 1,3,8,33,3 2,4,5,6,7,3<br>5,37,38,39 4,36,40 | 1 Q80WL1                                    |
| 4663 | 1,3,8,33,3 2,4,5,6,7,3<br>5,37,38,40 4,36,39 | 2 Q80WL1,Q9Z1F2                             |
| 4664 | 1,3,8,33,3 2,4,5,6,7,3<br>5,37,39,40 4,36,38 | 5 P50116,P80299,Q4KLZ6,Q80WL1,Q9QWN8        |
| 4665 | 1,3,8,33,3 2,4,5,6,7,3<br>5,38,39,40 4,36,37 | 4 P11598,P48199,Q80WL1,Q9JJ50               |
| 4666 | 1,3,8,33,3 2,4,5,6,7,3<br>6,37,38,39 4,35,40 | 1 Q80WL1                                    |
| 4667 | 1,3,8,33,3 2,4,5,6,7,3<br>6,37,38,40 4,35,39 | 4 P01681,P70549,Q80WL1,Q9Z1F2               |
| 4668 | 1,3,8,33,3 2,4,5,6,7,3<br>6,37,39,40 4,35,38 | 6 P01681,P50116,P70549,P80299,Q80WL1,Q9QWN8 |
| 4669 | 1,3,8,33,3 2,4,5,6,7,3<br>6,38,39,40 4,35,37 | 4 P01681,P48199,Q64093,Q80WL1               |
| 4670 | 1,3,8,33,3 2,4,5,6,7,3<br>7,38,39,40 4,35,36 | 6 P21674,P48199,Q5I0D7,Q80WL1,Q9QWN8,Q9Z1F2 |
| 4671 | 1,3,8,34,3 2,4,5,6,7,3<br>5,36,37,38 3,39,40 | 3 P01039,P02091,P50116                      |
| 4672 | 1,3,8,34,3 2,4,5,6,7,3<br>5,36,37,39 3,38,40 | 3 P01039,P50116,Q923V8                      |
| 4673 | 1,3,8,34,3 2,4,5,6,7,3<br>5,36,37,40 3,38,39 | 5 P13432,P50115,P50116,P70549,Q923V8        |
| 4674 | 1,3,8,34,3 2,4,5,6,7,3<br>5,36,38,39 3,37,40 | 3 D3ZTX0,P01039,P02091                      |
| 4675 | 1,3,8,34,3 2,4,5,6,7,3<br>5,36,38,40 3,37,39 | 4 D3ZTX0,P02091,P15399,Q9QZ76               |
| 4676 | 1,3,8,34,3 2,4,5,6,7,3<br>5,36,39,40 3,37,38 | 2 D3ZTX0,P50116                             |
| 4677 | 1,3,8,34,3 2,4,5,6,7,3<br>5,37,38,39 3,36,40 | 5 P01039,P02091,P16636,P50116,Q923V8        |

|      |                               |                        |    |                                                                                     |
|------|-------------------------------|------------------------|----|-------------------------------------------------------------------------------------|
| 4678 | 1,3,8,34,3<br>5,37,38,40      | 2,4,5,6,7,3<br>3,36,39 | 5  | D3ZTX0,P02091,P15399,P16636,Q923V8                                                  |
| 4679 | 1,3,8,34,3<br>5,37,39,40      | 2,4,5,6,7,3<br>3,36,38 | 4  | P16636,P50115,P50116,Q923V8                                                         |
| 4680 | 1,3,8,34,3<br>5,38,39,40      | 2,4,5,6,7,3<br>3,36,37 | 8  | D3ZTX0,P02091,P11598,P11883,P15399,P16636,P97580,Q63751                             |
| 4681 | 1,3,8,34,3<br>6,37,38,39      | 2,4,5,6,7,3<br>3,35,40 | 6  | P01039,P01946,P02091,Q64093,Q6AY41,Q9EQS0                                           |
| 4682 | 1,3,8,34,3<br>6,37,38,40      | 2,4,5,6,7,3<br>3,35,39 | 3  | D3ZTX0,P02091,Q811M5                                                                |
| 4683 | 1,3,8,34,3<br>6,37,39,40      | 2,4,5,6,7,3<br>3,35,38 | 5  | P13432,P19629,P50116,P70549,Q923V8                                                  |
| 4684 | 1,3,8,34,3<br>6,38,39,40      | 2,4,5,6,7,3<br>3,35,37 | 6  | D3ZTX0,P01946,P02091,P15399,P97580,Q64093                                           |
| 4685 | 1,3,8,34,3<br>7,38,39,40      | 2,4,5,6,7,3<br>3,35,36 | 7  | P02091,P15399,P16636,P49134,P97580,Q5I0D7,Q923V8                                    |
| 4686 | 1,3,8,35,3<br>6,37,38,39      | 2,4,5,6,7,3<br>3,34,40 | 4  | P01039,P50116,P70549,P80299                                                         |
| 4687 | 1,3,8,35,3<br>6,37,38,40      | 2,4,5,6,7,3<br>3,34,39 | 6  | D3ZTX0,P16636,P50116,P70549,P80299,Q9QW30                                           |
| 4688 | 1,3,8,35,3<br>6,37,39,40      | 2,4,5,6,7,3<br>3,34,38 | 4  | P50116,P70549,P80299,P97829                                                         |
| 4689 | 1,3,8,35,3<br>6,38,39,40      | 2,4,5,6,7,3<br>3,34,37 | 4  | D3ZTX0,P11598,P16636,Q63751                                                         |
| 4690 | 1,3,8,35,3<br>7,38,39,40      | 2,4,5,6,7,3<br>3,34,36 | 12 | D3ZTX0,P08649,P08721,P16636,P50116,P80299,Q5I0D7,Q63751,Q80WL1,Q99PP0,Q9QW30,Q9ZQ5  |
| 4691 | 1,3,8,36,3<br>7,38,39,40      | 2,4,5,6,7,3<br>3,34,35 | 7  | D3ZUC6,P19629,P70549,P80299,Q5I0D7,Q80WL1,Q9QW30                                    |
| 4692 | 1,3,33,34,<br>35,36,37,3<br>8 | 2,4,5,6,7,8<br>,39,40  | 7  | O54858,P02091,P20762,P22273,P25031,Q6PCU2,Q9Z0J6                                    |
| 4693 | 1,3,33,34,<br>35,36,37,3<br>9 | 2,4,5,6,7,8<br>,38,40  | 12 | O35276,O35568,O54858,P22273,P25031,P36374,P50115,P50116,P70549,Q6PCU2,Q99041,Q9Z0J6 |
| 4694 | 1,3,33,34,<br>35,36,37,4<br>0 | 2,4,5,6,7,8<br>,38,39  | 10 | O35276,O54858,P20762,P22273,P50115,P50116,P70549,Q4G075,Q6PCU2,Q9Z0J6               |
| 4695 | 1,3,33,34,<br>35,36,38,3<br>9 | 2,4,5,6,7,8<br>,37,40  | 6  | B5DFC9,O54858,P02091,P22273,Q99041,Q9Z0J6                                           |



|      |                               |                       |    |                                                                              |
|------|-------------------------------|-----------------------|----|------------------------------------------------------------------------------|
| 4696 | 1,3,33,34,<br>35,36,38,4<br>0 | 2,4,5,6,7,8<br>,37,39 | 6  | O54858,P02091,P20762,P22273,P63029,Q9Z0J6                                    |
| 4697 | 1,3,33,34,<br>35,36,39,4<br>0 | 2,4,5,6,7,8<br>,37,38 | 10 | O35276,O54858,P01681,P19218,P22273,P50115,P50116,Q6PCU2,Q99041,Q9Z0J6        |
| 4698 | 1,3,33,34,<br>35,37,38,3<br>9 | 2,4,5,6,7,8<br>,36,40 | 6  | B0BNN3,O54858,P02091,P02454,P22273,Q9QZQ5                                    |
| 4699 | 1,3,33,34,<br>35,37,38,4<br>0 | 2,4,5,6,7,8<br>,36,39 | 9  | B0BNN3,O54858,P02091,P20762,P22273,P63029,Q9QZQ5,Q9Z0J6,Q9Z1F2               |
| 4700 | 1,3,33,34,<br>35,37,39,4<br>0 | 2,4,5,6,7,8<br>,36,38 | 7  | O35276,O54858,P19218,P22273,P50115,P50116,Q9Z0J6                             |
| 4701 | 1,3,33,34,<br>35,38,39,4<br>0 | 2,4,5,6,7,8<br>,36,37 | 10 | O54858,P02091,P07171,P11598,P22273,P48199,Q63617,Q9JJ50,Q9QZQ5,Q9Z0J6        |
| 4702 | 1,3,33,34,<br>36,37,38,3<br>9 | 2,4,5,6,7,8<br>,35,40 | 9  | O54858,P01946,P02091,P02454,P22273,P36374,Q64093,Q99041,Q9Z0J6               |
| 4703 | 1,3,33,34,<br>36,37,38,4<br>0 | 2,4,5,6,7,8<br>,35,39 | 8  | O54858,P02091,P20762,P22273,P36374,Q4AEF8,Q9Z0J6,Q9Z1F2                      |
| 4704 | 1,3,33,34,<br>36,37,39,4<br>0 | 2,4,5,6,7,8<br>,35,38 | 10 | O35276,O54858,P19218,P22273,P36374,P50115,P50116,P70549,Q99041,Q9Z0J6        |
| 4705 | 1,3,33,34,<br>36,38,39,4<br>0 | 2,4,5,6,7,8<br>,35,37 | 11 | O54858,P01946,P02091,P19132,P19218,P22273,P48199,Q63617,Q64093,Q99041,Q9Z0J6 |
| 4706 | 1,3,33,34,<br>37,38,39,4<br>0 | 2,4,5,6,7,8<br>,35,36 | 8  | O54858,P02091,P19218,P48199,Q64093,Q9QZQ5,Q9Z0J6,Q9Z1F2                      |
| 4707 | 1,3,33,35,<br>36,37,38,3<br>9 | 2,4,5,6,7,8<br>,34,40 | 9  | O35276,O35568,O54858,P02454,P02631,P20762,P22273,P70549,Q9QW30               |
| 4708 | 1,3,33,35,<br>36,37,38,4<br>0 | 2,4,5,6,7,8<br>,34,39 | 9  | O35276,O54858,P20762,P22273,P63029,P70549,Q9QW30,Q9Z0V6,Q9Z1F2               |

|      |                               |                               |    |                                                                                                                                                    |
|------|-------------------------------|-------------------------------|----|----------------------------------------------------------------------------------------------------------------------------------------------------|
| 4709 | 1,3,33,35,<br>36,37,39,4<br>0 | 2,4,5,6,7,8<br>,34,38         | 10 | O35276,O35568,O54858,P20762,P22273,P50115,P50116,P70549,Q4G075,Q9QW30                                                                              |
| 4710 | 1,3,33,35,<br>36,38,39,4<br>0 | 2,4,5,6,7,8<br>,34,37         | 14 | O35276,O54858,P01681,P02631,P06760,P11598,P20762,P22273,P22282,P48199,P62804,Q63617,Q99041,Q9JJ50                                                  |
| 4711 | 1,3,33,35,<br>37,38,39,4<br>0 | 2,4,5,6,7,8<br>,34,36         | 13 | O35276,O54858,P02454,P08649,P11598,P20762,P48199,Q63751,Q80WL1,Q99PP0,Q9QW30,Q9QZQ5,Q9Z1F2                                                         |
| 4712 | 1,3,33,36,<br>37,38,39,4<br>0 | 2,4,5,6,7,8<br>,34,35         | 8  | O35276,O54858,P20762,P36374,P48199,P70549,Q9QW30,Q9Z1F2                                                                                            |
| 4713 | 1,3,34,35,<br>36,37,38,3<br>9 | 2,4,5,6,7,8<br>,33,40         | 14 | O35276,O54858,P01039,P02091,P02454,P02631,P16636,P22273,P25031,P42854,P50116,Q99PP0,Q9QW30,Q9QZQ5                                                  |
| 4714 | 1,3,34,35,<br>36,37,38,4<br>0 | 2,4,5,6,7,8<br>,33,39         | 14 | D3ZTE0,D3ZTX0,O54858,P02091,P02454,P02631,P16636,P20762,P22273,P50115,P70549,Q99P0,Q9QW30,Q9QZQ5                                                   |
| 4715 | 1,3,34,35,<br>36,37,39,4<br>0 | 2,4,5,6,7,8<br>,33,38         | 13 | O35276,O54858,P02454,P02631,P13852,P22273,P50115,P50116,P70549,Q4G075,Q99PP0,Q9QW30,Q9QZQ5                                                         |
| 4716 | 1,3,34,35,<br>36,38,39,4<br>0 | 2,4,5,6,7,8<br>,33,37         | 11 | D3ZTX0,O54858,P02091,P02454,P02631,P11598,P16636,P22273,Q63617,Q63751,Q9QZQ5                                                                       |
| 4717 | 1,3,34,35,<br>37,38,39,4<br>0 | 2,4,5,6,7,8<br>,33,36         | 14 | D3ZTX0,O35276,O54858,P02091,P02454,P08649,P16636,P22273,P42854,P50115,Q63751,Q99P0,Q9QW30,Q9QZQ5                                                   |
| 4718 | 1,3,34,36,<br>37,38,39,4<br>0 | 2,4,5,6,7,8<br>,33,35         | 13 | D3ZTX0,O35276,O54858,P01946,P02091,P02454,P19629,P22273,Q4AEF8,Q64093,Q99PP0,Q9QW30,Q9QZQ5                                                         |
| 4719 | 1,3,35,36,<br>37,38,39,4<br>0 | 2,4,5,6,7,8<br>,33,34         | 21 | D3ZTX0,O35276,O54858,O55004,P02454,P02631,P11030,P13852,P16636,P20762,P22273,P42854,P50116,P70549,Q5I0D7,Q62740,Q63751,Q99PP0,Q9QW30,Q9QX74,Q9QZQ5 |
| 4720 | 1,4,5,6,7,8<br>,33,34<br>0    | 2,3,35,36,<br>37,38,39,4<br>0 | 11 | O54858,P08721,P11030,P11598,P18418,P22282,P98089,Q62635,Q63751,Q9QW30,Q9QX74                                                                       |
| 4721 | 1,4,5,6,7,8<br>,33,35<br>0    | 2,3,34,36,<br>37,38,39,4<br>0 | 2  | O54858,P48032                                                                                                                                      |

|      |                       |                               |    |                                                                                                   |
|------|-----------------------|-------------------------------|----|---------------------------------------------------------------------------------------------------|
| 4722 | 1,4,5,6,7,8<br>,33,36 | 2,3,34,35,<br>37,38,39,4<br>0 | 10 | O54728,O54858,P00774,P08721,P11598,P98089,Q62635,Q63493,Q63617,Q63751                             |
| 4723 | 1,4,5,6,7,8<br>,33,37 | 2,3,34,35,<br>36,38,39,4<br>0 | 13 | O54858,P06761,P0C0A9,P11598,P22273,P22282,P48032,P98089,Q62635,Q63493,Q63617,Q99041,Q9QW07        |
| 4724 | 1,4,5,6,7,8<br>,33,38 | 2,3,34,35,<br>36,37,39,4<br>0 | 4  | O54858,P22273,P50115,P50116                                                                       |
| 4725 | 1,4,5,6,7,8<br>,33,39 | 2,3,34,35,<br>36,37,38,4<br>0 | 3  | D3ZTE0,O54858,P22273                                                                              |
| 4726 | 1,4,5,6,7,8<br>,33,40 | 2,3,34,35,<br>36,37,38,3<br>9 | 3  | O54858,P22273,P25031                                                                              |
| 4727 | 1,4,5,6,7,8<br>,34,35 | 2,3,33,36,<br>37,38,39,4<br>0 | 4  | O54858,P48199,Q99041,Q9Z1F2                                                                       |
| 4728 | 1,4,5,6,7,8<br>,34,36 | 2,3,33,35,<br>37,38,39,4<br>0 | 9  | P11598,P22282,P48199,P55091,P98089,Q62635,Q63617,Q68G31,Q9Z1F2                                    |
| 4729 | 1,4,5,6,7,8<br>,34,37 | 2,3,33,35,<br>36,38,39,4<br>0 | 14 | P06760,P06761,P0C0A9,P11598,P22273,P22282,P48199,P49134,P55091,P63029,P98089,Q62635,Q63617,Q99041 |
| 4730 | 1,4,5,6,7,8<br>,34,38 | 2,3,33,35,<br>36,37,39,4<br>0 | 3  | P11598,P49134,P50116                                                                              |
| 4731 | 1,4,5,6,7,8<br>,34,39 | 2,3,33,35,<br>36,37,38,4<br>0 | 6  | P22282,P49134,P63029,Q68G31,Q9Z0V6,Q9Z1F2                                                         |
| 4732 | 1,4,5,6,7,8<br>,34,40 | 2,3,33,35,<br>36,37,38,3<br>9 | 5  | O54858,P11598,P49134,Q68G31,Q99041                                                                |
| 4733 | 1,4,5,6,7,8<br>,35,36 | 2,3,33,34,<br>37,38,39,4<br>0 | 9  | P19218,P48199,P97840,Q63617,Q64093,Q8VD89,Q99041,Q99376,Q9Z1F2                                    |
| 4734 | 1,4,5,6,7,8<br>,35,37 | 2,3,33,34,<br>36,38,39,4<br>0 | 12 | P0C0A9,P11598,P19132,P19218,P22273,P22282,P48032,P48199,Q63617,Q64093,Q99041,Q9Z0J6               |

|      |                        |                               |                                                                                                                                                           |
|------|------------------------|-------------------------------|-----------------------------------------------------------------------------------------------------------------------------------------------------------|
| 4735 | 1,4,5,6,7,8<br>,35,38  | 2,3,33,34,<br>36,37,39,4<br>0 | 4 P19218,P19814,Q99041,Q9Z0J6                                                                                                                             |
| 4736 | 1,4,5,6,7,8<br>,35,39  | 2,3,33,34,<br>36,37,38,4<br>0 | 4 P63029,Q99041,Q9Z0J6,Q9Z1F2                                                                                                                             |
| 4737 | 1,4,5,6,7,8<br>,35,40  | 2,3,33,34,<br>36,37,38,3<br>9 | 4 P22273,Q64093,Q99041,Q9Z0J6                                                                                                                             |
| 4738 | 1,4,5,6,7,8<br>,36,37  | 2,3,33,34,<br>35,38,39,4<br>0 | 21 P00774,P06761,P07171,P0C0A9,P11598,P19218,P22273,P22282,P46462,P49134,P55091,P6302<br>9,P97829,P97840,P98089,Q5I0D1,Q62635,Q63617,Q99041,Q9J185,Q9Z0J6 |
| 4739 | 1,4,5,6,7,8<br>,36,38  | 2,3,33,34,<br>35,37,39,4<br>0 | 4 P11598,P19218,Q63617,Q9Z0J6                                                                                                                             |
| 4740 | 1,4,5,6,7,8<br>,36,39  | 2,3,33,34,<br>35,37,38,4<br>0 | 4 P63029,Q63617,Q9Z0J6,Q9Z1F2                                                                                                                             |
| 4741 | 1,4,5,6,7,8<br>,36,40  | 2,3,33,34,<br>35,37,38,3<br>9 | 3 P11598,Q99041,Q99376                                                                                                                                    |
| 4742 | 1,4,5,6,7,8<br>,37,38  | 2,3,33,34,<br>35,36,39,4<br>0 | 9 P11598,P19218,P22273,P22282,P49134,Q63617,Q6P6Q2,Q99041,Q9Z0J6                                                                                          |
| 4743 | 1,4,5,6,7,8<br>,37,39  | 2,3,33,34,<br>35,36,38,4<br>0 | 10 D3ZUC6,P0C0A9,P11598,P22273,P22282,P49134,P63029,Q63617,Q99041,Q9Z0J6                                                                                  |
| 4744 | 1,4,5,6,7,8<br>,37,40  | 2,3,33,34,<br>35,36,38,3<br>9 | 10 D3ZUC6,P0C0A9,P11598,P22273,P22282,P49134,Q63617,Q99041,Q9QW07,Q9Z0J6                                                                                  |
| 4745 | 1,4,5,6,7,8<br>,38,39  | 2,3,33,34,<br>35,36,37,4<br>0 | 3 P22273,Q6PCU2,Q9Z0J6                                                                                                                                    |
| 4746 | 1,4,5,6,7,8<br>,38,40  | 2,3,33,34,<br>35,36,37,3<br>9 | 7 P22273,P25031,P49134,P50116,Q6PCU2,Q99041,Q9Z0J6                                                                                                        |
| 4747 | 1,4,5,6,7,8<br>,39,40  | 2,3,33,34,<br>35,36,37,3<br>8 | 7 D3ZUC6,P22273,P25031,P49134,P54921,Q99041,Q9Z0J6                                                                                                        |
| 4748 | 1,4,5,6,7,3<br>3,34,35 | 2,3,8,36,3<br>7,38,39,40      | 2 P08721,Q5I0D7                                                                                                                                           |

|      |                        |                          |    |                                                                              |
|------|------------------------|--------------------------|----|------------------------------------------------------------------------------|
| 4749 | 1,4,5,6,7,3<br>3,34,36 | 2,3,8,35,3<br>7,38,39,40 | 9  | P00774,P08494,P08721,P11598,P11883,P98089,Q5I0D7,Q62635,Q63751               |
| 4750 | 1,4,5,6,7,3<br>3,34,37 | 2,3,8,35,3<br>6,38,39,40 | 8  | P00774,P08721,P11598,P11883,P98089,Q5BJY9,Q62635,Q8CIZ5                      |
| 4751 | 1,4,5,6,7,3<br>3,34,38 | 2,3,8,35,3<br>6,37,39,40 | 3  | P08721,P50116,P80299                                                         |
| 4752 | 1,4,5,6,7,3<br>3,34,39 | 2,3,8,35,3<br>6,37,38,40 | 0  |                                                                              |
| 4753 | 1,4,5,6,7,3<br>3,34,40 | 2,3,8,35,3<br>6,37,38,39 | 1  | P10719                                                                       |
| 4754 | 1,4,5,6,7,3<br>3,35,36 | 2,3,8,34,3<br>7,38,39,40 | 6  | D4A5U3,P08721,P11883,P97840,Q8CIZ5,Q923V8                                    |
| 4755 | 1,4,5,6,7,3<br>3,35,37 | 2,3,8,34,3<br>6,38,39,40 | 5  | P11598,P48032,Q5BJY9,Q64093,Q8CIZ5                                           |
| 4756 | 1,4,5,6,7,3<br>3,35,38 | 2,3,8,34,3<br>6,37,39,40 | 1  | Q923V8                                                                       |
| 4757 | 1,4,5,6,7,3<br>3,35,39 | 2,3,8,34,3<br>6,37,38,40 | 1  | P62804                                                                       |
| 4758 | 1,4,5,6,7,3<br>3,35,40 | 2,3,8,34,3<br>6,37,38,39 | 1  | Q9EQS0                                                                       |
| 4759 | 1,4,5,6,7,3<br>3,36,37 | 2,3,8,34,3<br>5,38,39,40 | 11 | P00774,P08721,P11598,P11883,P25809,P55091,P97840,P98089,Q62635,Q63617,Q8CIZ5 |
| 4760 | 1,4,5,6,7,3<br>3,36,38 | 2,3,8,34,3<br>5,37,39,40 | 6  | P00774,P08721,P36860,P50116,Q03191,Q923V8                                    |
| 4761 | 1,4,5,6,7,3<br>3,36,39 | 2,3,8,34,3<br>5,37,38,40 | 4  | P08721,P25809,P36860,Q923V8                                                  |
| 4762 | 1,4,5,6,7,3<br>3,36,40 | 2,3,8,34,3<br>5,37,38,39 | 5  | P11883,P25809,P36860,P52590,Q923V8                                           |
| 4763 | 1,4,5,6,7,3<br>3,37,38 | 2,3,8,34,3<br>5,36,39,40 | 1  | P11598                                                                       |
| 4764 | 1,4,5,6,7,3<br>3,37,39 | 2,3,8,34,3<br>5,36,38,40 | 1  | P11598                                                                       |
| 4765 | 1,4,5,6,7,3<br>3,37,40 | 2,3,8,34,3<br>5,36,38,39 | 3  | P11598,P25809,Q9QW07                                                         |
| 4766 | 1,4,5,6,7,3<br>3,38,39 | 2,3,8,34,3<br>5,36,37,40 | 2  | P50116,Q923V8                                                                |
| 4767 | 1,4,5,6,7,3<br>3,38,40 | 2,3,8,34,3<br>5,36,37,39 | 4  | P25809,P36860,P50116,Q923V8                                                  |
| 4768 | 1,4,5,6,7,3<br>3,39,40 | 2,3,8,34,3<br>5,36,37,38 | 1  | P25809                                                                       |

|      |                        |                          |    |                                                                                     |
|------|------------------------|--------------------------|----|-------------------------------------------------------------------------------------|
| 4769 | 1,4,5,6,7,3<br>4,35,36 | 2,3,8,33,3<br>7,38,39,40 | 6  | P11883,P48199,P97840,Q68G31,Q9QWN8,Q9Z1F2                                           |
| 4770 | 1,4,5,6,7,3<br>4,35,37 | 2,3,8,33,3<br>6,38,39,40 | 3  | P11598,Q8CIZ5,Q99041                                                                |
| 4771 | 1,4,5,6,7,3<br>4,35,38 | 2,3,8,33,3<br>6,37,39,40 | 1  | Q9QWN8                                                                              |
| 4772 | 1,4,5,6,7,3<br>4,35,39 | 2,3,8,33,3<br>6,37,38,40 | 1  | Q9Z1F2                                                                              |
| 4773 | 1,4,5,6,7,3<br>4,35,40 | 2,3,8,33,3<br>6,37,38,39 | 0  |                                                                                     |
| 4774 | 1,4,5,6,7,3<br>4,36,37 | 2,3,8,33,3<br>5,38,39,40 | 11 | P00774,P11598,P11883,P47967,P49134,P55091,P97840,P98089,Q62635,Q63617,Q8CIZ5        |
| 4775 | 1,4,5,6,7,3<br>4,36,38 | 2,3,8,33,3<br>5,37,39,40 | 2  | P50116,Q9QWN8                                                                       |
| 4776 | 1,4,5,6,7,3<br>4,36,39 | 2,3,8,33,3<br>5,37,38,40 | 2  | Q68G31,Q9Z1F2                                                                       |
| 4777 | 1,4,5,6,7,3<br>4,36,40 | 2,3,8,33,3<br>5,37,38,39 | 2  | P11883,Q68G31                                                                       |
| 4778 | 1,4,5,6,7,3<br>4,37,38 | 2,3,8,33,3<br>5,36,39,40 | 2  | P11598,P49134                                                                       |
| 4779 | 1,4,5,6,7,3<br>4,37,39 | 2,3,8,33,3<br>5,36,38,40 | 3  | P11598,P49134,P63029                                                                |
| 4780 | 1,4,5,6,7,3<br>4,37,40 | 2,3,8,33,3<br>5,36,38,39 | 4  | P11598,P49134,Q99041,Q9QW07                                                         |
| 4781 | 1,4,5,6,7,3<br>4,38,39 | 2,3,8,33,3<br>5,36,37,40 | 1  | P50116                                                                              |
| 4782 | 1,4,5,6,7,3<br>4,38,40 | 2,3,8,33,3<br>5,36,37,39 | 2  | P49134,P50116                                                                       |
| 4783 | 1,4,5,6,7,3<br>4,39,40 | 2,3,8,33,3<br>5,36,37,38 | 2  | P49134,Q68G31                                                                       |
| 4784 | 1,4,5,6,7,3<br>5,36,37 | 2,3,8,33,3<br>4,38,39,40 | 12 | P11598,P11883,P19132,P19218,P47967,P55091,P97840,Q5I0D1,Q63617,Q64093,Q8CIZ5,Q99041 |
| 4785 | 1,4,5,6,7,3<br>5,36,38 | 2,3,8,33,3<br>4,37,39,40 | 6  | P19218,P19814,Q8VD89,Q923V8,Q99376,Q9QWN8                                           |
| 4786 | 1,4,5,6,7,3<br>5,36,39 | 2,3,8,33,3<br>4,37,38,40 | 3  | P23739,Q5PQL7,Q9Z1F2                                                                |
| 4787 | 1,4,5,6,7,3<br>5,36,40 | 2,3,8,33,3<br>4,37,38,39 | 6  | P02793;Q7TP54,P19132,Q64093,Q99376,Q9EQS0,Q9QWN8                                    |
| 4788 | 1,4,5,6,7,3<br>5,37,38 | 2,3,8,33,3<br>4,36,39,40 | 5  | P19218,P19814,Q99041,Q99MH3,Q9Z0J6                                                  |

|      |                        |                          |    |                                                                       |
|------|------------------------|--------------------------|----|-----------------------------------------------------------------------|
| 4789 | 1,4,5,6,7,3<br>5,37,39 | 2,3,8,33,3<br>4,36,38,40 | 4  | P00762,P02625,P63029,Q9Z0J6                                           |
| 4790 | 1,4,5,6,7,3<br>5,37,40 | 2,3,8,33,3<br>4,36,38,39 | 6  | P00762,P02625,P19132,Q64093,Q99041,Q99MH3                             |
| 4791 | 1,4,5,6,7,3<br>5,38,39 | 2,3,8,33,3<br>4,36,37,40 | 2  | P19814,Q9Z0J6                                                         |
| 4792 | 1,4,5,6,7,3<br>5,38,40 | 2,3,8,33,3<br>4,36,37,39 | 5  | P19814,Q6P6R2,Q99041,Q99376,Q99MH3                                    |
| 4793 | 1,4,5,6,7,3<br>5,39,40 | 2,3,8,33,3<br>4,36,37,38 | 3  | P00762,P02625,Q9Z0J6                                                  |
| 4794 | 1,4,5,6,7,3<br>6,37,38 | 2,3,8,33,3<br>4,35,39,40 | 5  | P00774,P11598,P19218,P97840,Q63617                                    |
| 4795 | 1,4,5,6,7,3<br>6,37,39 | 2,3,8,33,3<br>4,35,38,40 | 5  | P00762,P11598,P63029,Q63617,Q9Z0J6                                    |
| 4796 | 1,4,5,6,7,3<br>6,37,40 | 2,3,8,33,3<br>4,35,38,39 | 6  | P00762,P11598,P11883,P19132,P25809,Q63617                             |
| 4797 | 1,4,5,6,7,3<br>6,38,39 | 2,3,8,33,3<br>4,35,37,40 | 3  | P36860,Q923V8,Q9Z0J6                                                  |
| 4798 | 1,4,5,6,7,3<br>6,38,40 | 2,3,8,33,3<br>4,35,37,39 | 5  | P25809,P36860,Q923V8,Q99376,Q9QWN8                                    |
| 4799 | 1,4,5,6,7,3<br>6,39,40 | 2,3,8,33,3<br>4,35,37,38 | 2  | P00762,P25809                                                         |
| 4800 | 1,4,5,6,7,3<br>7,38,39 | 2,3,8,33,3<br>4,35,36,40 | 2  | P00762,Q9Z0J6                                                         |
| 4801 | 1,4,5,6,7,3<br>7,38,40 | 2,3,8,33,3<br>4,35,36,39 | 6  | P01835,P25809,P49134,Q99041,Q99MH3,Q9Z0J6                             |
| 4802 | 1,4,5,6,7,3<br>7,39,40 | 2,3,8,33,3<br>4,35,36,38 | 6  | P00762,P02625,P25809,P49134,P63029,Q9Z0J6                             |
| 4803 | 1,4,5,6,7,3<br>8,39,40 | 2,3,8,33,3<br>4,35,36,37 | 5  | O89117,P25809,P51740,Q6PCU2,Q9Z0J6                                    |
| 4804 | 1,4,5,6,8,3<br>3,34,35 | 2,3,7,36,3<br>7,38,39,40 | 2  | P35952,Q64093                                                         |
| 4805 | 1,4,5,6,8,3<br>3,34,36 | 2,3,7,35,3<br>7,38,39,40 | 10 | O54728,P00774,P08494,P08649,P08721,P11883,P18418,P98089,Q62635,Q63751 |
| 4806 | 1,4,5,6,8,3<br>3,34,37 | 2,3,7,35,3<br>6,38,39,40 | 3  | P13432,P98089,Q62635                                                  |
| 4807 | 1,4,5,6,8,3<br>3,34,38 | 2,3,7,35,3<br>6,37,39,40 | 1  | Q6IG05                                                                |
| 4808 | 1,4,5,6,8,3<br>3,34,39 | 2,3,7,35,3<br>6,37,38,40 | 1  | P02793;Q7TP54                                                         |

|      |                        |                          |   |                                                         |
|------|------------------------|--------------------------|---|---------------------------------------------------------|
| 4809 | 1,4,5,6,8,3<br>3,34,40 | 2,3,7,35,3<br>6,37,38,39 | 4 | P13432,P15399,P18418,P25031                             |
| 4810 | 1,4,5,6,8,3<br>3,35,36 | 2,3,7,34,3<br>7,38,39,40 | 6 | O54728,P01681,P62804,Q64093,Q6AY61,Q8VD89               |
| 4811 | 1,4,5,6,8,3<br>3,35,37 | 2,3,7,34,3<br>6,38,39,40 | 2 | P20766,Q64093                                           |
| 4812 | 1,4,5,6,8,3<br>3,35,38 | 2,3,7,34,3<br>6,37,39,40 | 2 | Q64093,Q8VD89                                           |
| 4813 | 1,4,5,6,8,3<br>3,35,39 | 2,3,7,34,3<br>6,37,38,40 | 1 | P62804                                                  |
| 4814 | 1,4,5,6,8,3<br>3,35,40 | 2,3,7,34,3<br>6,37,38,39 | 2 | P25031,Q64093                                           |
| 4815 | 1,4,5,6,8,3<br>3,36,37 | 2,3,7,34,3<br>5,38,39,40 | 8 | O54728,P00774,P08723,P11883,P20766,P55091,P98089,Q62635 |
| 4816 | 1,4,5,6,8,3<br>3,36,38 | 2,3,7,34,3<br>5,37,39,40 | 2 | O54728,Q923V8                                           |
| 4817 | 1,4,5,6,8,3<br>3,36,39 | 2,3,7,34,3<br>5,37,38,40 | 2 | O54728,P20767                                           |
| 4818 | 1,4,5,6,8,3<br>3,36,40 | 2,3,7,34,3<br>5,37,38,39 | 4 | O54728,P01681,P25031,P52590                             |
| 4819 | 1,4,5,6,8,3<br>3,37,38 | 2,3,7,34,3<br>5,36,39,40 | 2 | P20766,Q6P6Q2                                           |
| 4820 | 1,4,5,6,8,3<br>3,37,39 | 2,3,7,34,3<br>5,36,38,40 | 0 |                                                         |
| 4821 | 1,4,5,6,8,3<br>3,37,40 | 2,3,7,34,3<br>5,36,38,39 | 4 | P13432,P20766,P25031,Q9QW07                             |
| 4822 | 1,4,5,6,8,3<br>3,38,39 | 2,3,7,34,3<br>5,36,37,40 | 0 |                                                         |
| 4823 | 1,4,5,6,8,3<br>3,38,40 | 2,3,7,34,3<br>5,36,37,39 | 1 | P25031                                                  |
| 4824 | 1,4,5,6,8,3<br>3,39,40 | 2,3,7,34,3<br>5,36,37,38 | 2 | P25031,P54921                                           |
| 4825 | 1,4,5,6,8,3<br>4,35,36 | 2,3,7,33,3<br>7,38,39,40 | 6 | P02770,P48199,Q5RKI1,Q64093,Q6AY61,Q9Z1F2               |
| 4826 | 1,4,5,6,8,3<br>4,35,37 | 2,3,7,33,3<br>6,38,39,40 | 2 | Q5RKI1,Q64093                                           |
| 4827 | 1,4,5,6,8,3<br>4,35,38 | 2,3,7,33,3<br>6,37,39,40 | 2 | Q30KJ2,Q5RKI1                                           |
| 4828 | 1,4,5,6,8,3<br>4,35,39 | 2,3,7,33,3<br>6,37,38,40 | 2 | Q9Z0V6,Q9Z1F2                                           |



|      |                        |                          |    |                                                                       |
|------|------------------------|--------------------------|----|-----------------------------------------------------------------------|
| 4829 | 1,4,5,6,8,3<br>4,35,40 | 2,3,7,33,3<br>6,37,38,39 | 6  | P13432,P15399,P97580,Q30KJ2,Q5RKI1,Q64093                             |
| 4830 | 1,4,5,6,8,3<br>4,36,37 | 2,3,7,33,3<br>5,38,39,40 | 9  | P00774,P11883,P13432,P49134,P55091,P98089,Q5RKI1,Q62635,Q9JI85        |
| 4831 | 1,4,5,6,8,3<br>4,36,38 | 2,3,7,33,3<br>5,37,39,40 | 1  | Q5RKI1                                                                |
| 4832 | 1,4,5,6,8,3<br>4,36,39 | 2,3,7,33,3<br>5,37,38,40 | 1  | Q9Z1F2                                                                |
| 4833 | 1,4,5,6,8,3<br>4,36,40 | 2,3,7,33,3<br>5,37,38,39 | 3  | P13432,P15399,Q5RKI1                                                  |
| 4834 | 1,4,5,6,8,3<br>4,37,38 | 2,3,7,33,3<br>5,36,39,40 | 3  | P49134,Q5RKI1,Q6P6Q2                                                  |
| 4835 | 1,4,5,6,8,3<br>4,37,39 | 2,3,7,33,3<br>5,36,38,40 | 3  | P13432,P49134,P63029                                                  |
| 4836 | 1,4,5,6,8,3<br>4,37,40 | 2,3,7,33,3<br>5,36,38,39 | 5  | P13432,P15399,P49134,Q5RKI1,Q9QW07                                    |
| 4837 | 1,4,5,6,8,3<br>4,38,39 | 2,3,7,33,3<br>5,36,37,40 | 1  | Q30KJ2                                                                |
| 4838 | 1,4,5,6,8,3<br>4,38,40 | 2,3,7,33,3<br>5,36,37,39 | 6  | P15399,P25031,P49134,P97580,Q30KJ2,Q5RKI1                             |
| 4839 | 1,4,5,6,8,3<br>4,39,40 | 2,3,7,33,3<br>5,36,37,38 | 6  | P13432,P15399,P49134,P54921,P97580,Q30KJ2                             |
| 4840 | 1,4,5,6,8,3<br>5,36,37 | 2,3,7,33,3<br>4,38,39,40 | 10 | F1M3L7,P01039,P02770,P19132,P19218,P20766,P46720,P55091,Q5RKI1,Q64093 |
| 4841 | 1,4,5,6,8,3<br>5,36,38 | 2,3,7,33,3<br>4,37,39,40 | 6  | P19218,P19814,Q5RKI1,Q64093,Q6AY61,Q8VD89                             |
| 4842 | 1,4,5,6,8,3<br>5,36,39 | 2,3,7,33,3<br>4,37,38,40 | 5  | P23739,P54921,Q62714,Q6AY61,Q9Z1F2                                    |
| 4843 | 1,4,5,6,8,3<br>5,36,40 | 2,3,7,33,3<br>4,37,38,39 | 5  | P46720,P54921,Q5RKI1,Q64093,Q6AY61                                    |
| 4844 | 1,4,5,6,8,3<br>5,37,38 | 2,3,7,33,3<br>4,36,39,40 | 6  | P19218,P19814,P20766,Q5RKI1,Q64093,Q99041                             |
| 4845 | 1,4,5,6,8,3<br>5,37,39 | 2,3,7,33,3<br>4,36,38,40 | 2  | P63029,Q64093                                                         |
| 4846 | 1,4,5,6,8,3<br>5,37,40 | 2,3,7,33,3<br>4,36,38,39 | 7  | P20766,P80299,P82471,Q5RKI1,Q64093,Q99041,Q9QW07                      |
| 4847 | 1,4,5,6,8,3<br>5,38,39 | 2,3,7,33,3<br>4,36,37,40 | 1  | P54921                                                                |
| 4848 | 1,4,5,6,8,3<br>5,38,40 | 2,3,7,33,3<br>4,36,37,39 | 6  | P19814,P25031,P54921,Q5RKI1,Q64093,Q99041                             |

|      |                         |                          |    |                                                                                     |
|------|-------------------------|--------------------------|----|-------------------------------------------------------------------------------------|
| 4849 | 1,4,5,6,8,3<br>5,39,40  | 2,3,7,33,3<br>4,36,37,38 | 2  | P54921,Q64093                                                                       |
| 4850 | 1,4,5,6,8,3<br>6,37,38  | 2,3,7,33,3<br>4,35,39,40 | 3  | P19218,P20766,Q5RKI1                                                                |
| 4851 | 1,4,5,6,8,3<br>6,37,39  | 2,3,7,33,3<br>4,35,38,40 | 2  | P63029,P97829                                                                       |
| 4852 | 1,4,5,6,8,3<br>6,37,40  | 2,3,7,33,3<br>4,35,38,39 | 8  | P06911,P13432,P20766,P49134,P82471,Q5RKI1,Q64093,Q9QW07                             |
| 4853 | 1,4,5,6,8,3<br>6,38,39  | 2,3,7,33,3<br>4,35,37,40 | 0  |                                                                                     |
| 4854 | 1,4,5,6,8,3<br>6,38,40  | 2,3,7,33,3<br>4,35,37,39 | 2  | P25031,Q5RKI1                                                                       |
| 4855 | 1,4,5,6,8,3<br>6,39,40  | 2,3,7,33,3<br>4,35,37,38 | 2  | P54921,Q9R168                                                                       |
| 4856 | 1,4,5,6,8,3<br>7,38,39  | 2,3,7,33,3<br>4,35,36,40 | 2  | Q6P6Q2,Q9Z0J6                                                                       |
| 4857 | 1,4,5,6,8,3<br>7,38,40  | 2,3,7,33,3<br>4,35,36,39 | 6  | P20766,P25031,P49134,Q5RKI1,Q6P6Q2,Q99041                                           |
| 4858 | 1,4,5,6,8,3<br>7,39,40  | 2,3,7,33,3<br>4,35,36,38 | 4  | D3ZUC6,P49134,P80299,P82471                                                         |
| 4859 | 1,4,5,6,8,3<br>8,39,40  | 2,3,7,33,3<br>4,35,36,37 | 4  | P25031,P51740,P54921,Q6PCU2                                                         |
| 4860 | 1,4,5,6,33,<br>34,35,36 | 2,3,7,8,37,<br>38,39,40  | 11 | D3ZUC6,D4A5U3,P08494,P08721,P11883,P35280,Q05175,Q5I0D7,Q5QE79,Q62635,Q9EQS0        |
| 4861 | 1,4,5,6,33,<br>34,35,37 | 2,3,7,8,36,<br>38,39,40  | 7  | P11883,P20766,P35280,Q5BJY9,Q62635,Q64093,Q8CIZ5                                    |
| 4862 | 1,4,5,6,33,<br>34,35,38 | 2,3,7,8,36,<br>37,39,40  | 0  |                                                                                     |
| 4863 | 1,4,5,6,33,<br>34,35,39 | 2,3,7,8,36,<br>37,38,40  | 2  | P35280,P62804                                                                       |
| 4864 | 1,4,5,6,33,<br>34,35,40 | 2,3,7,8,36,<br>37,38,39  | 3  | P35280,Q64093,Q9EQS0                                                                |
| 4865 | 1,4,5,6,33,<br>34,36,37 | 2,3,7,8,35,<br>38,39,40  | 12 | P00774,P08494,P08721,P11883,P20766,P35280,P55091,P97584,P98089,Q5QE79,Q62635,Q8CIZ5 |
| 4866 | 1,4,5,6,33,<br>34,36,38 | 2,3,7,8,35,<br>37,39,40  | 5  | P00774,P08494,P08721,P36860,Q923V8                                                  |
| 4867 | 1,4,5,6,33,<br>34,36,39 | 2,3,7,8,35,<br>37,38,40  | 5  | P04355,P08494,P11883,P35280,P36860                                                  |
| 4868 | 1,4,5,6,33,<br>34,36,40 | 2,3,7,8,35,<br>37,38,39  | 5  | P08494,P11883,P35280,P36860,Q9EQS0                                                  |

|      |                                              |                                                                                            |
|------|----------------------------------------------|--------------------------------------------------------------------------------------------|
| 4869 | 1,4,5,6,33, 2,3,7,8,35,<br>34,37,38 36,39,40 | 1 P20766                                                                                   |
| 4870 | 1,4,5,6,33, 2,3,7,8,35,<br>34,37,39 36,38,40 | 1 P35280                                                                                   |
| 4871 | 1,4,5,6,33, 2,3,7,8,35,<br>34,37,40 36,38,39 | 2 P11883,P35280                                                                            |
| 4872 | 1,4,5,6,33, 2,3,7,8,35,<br>34,38,39 36,37,40 | 2 P02793;Q7TP54,P19132                                                                     |
| 4873 | 1,4,5,6,33, 2,3,7,8,35,<br>34,38,40 36,37,39 | 1 P36860                                                                                   |
| 4874 | 1,4,5,6,33, 2,3,7,8,35,<br>34,39,40 36,37,38 | 1 P35280                                                                                   |
| 4875 | 1,4,5,6,33, 2,3,7,8,34,<br>35,36,37 38,39,40 | 12 D4A5U3,F1M3L7,P11883,P12368,P20766,P35280,P50503,P55091,Q62635,Q64093,Q8CIZ5,Q9E<br>QS0 |
| 4876 | 1,4,5,6,33, 2,3,7,8,34,<br>35,36,38 37,39,40 | 6 P20766,P62804,Q03191,Q05175,Q8VD89,Q923V8                                                |
| 4877 | 1,4,5,6,33, 2,3,7,8,34,<br>35,36,39 37,38,40 | 5 P23739,P35280,P62804,Q923V8,Q9EQS0                                                       |
| 4878 | 1,4,5,6,33, 2,3,7,8,34,<br>35,36,40 37,38,39 | 6 P11883,P20766,P35280,P62804,Q64093,Q9EQS0                                                |
| 4879 | 1,4,5,6,33, 2,3,7,8,34,<br>35,37,38 36,39,40 | 2 P20766,Q64093                                                                            |
| 4880 | 1,4,5,6,33, 2,3,7,8,34,<br>35,37,39 36,38,40 | 3 P20766,P35280,P62804                                                                     |
| 4881 | 1,4,5,6,33, 2,3,7,8,34,<br>35,37,40 36,38,39 | 5 P11883,P20766,P35280,Q64093,Q9EQS0                                                       |
| 4882 | 1,4,5,6,33, 2,3,7,8,34,<br>35,38,39 36,37,40 | 4 P62804,P70502,Q811M5,Q923V8                                                              |
| 4883 | 1,4,5,6,33, 2,3,7,8,34,<br>35,38,40 36,37,39 | 4 P20766,P62804,Q64093,Q6P6R2                                                              |
| 4884 | 1,4,5,6,33, 2,3,7,8,34,<br>35,39,40 36,37,38 | 4 P35280,P62804,Q00715,Q9EQS0                                                              |
| 4885 | 1,4,5,6,33, 2,3,7,8,34,<br>36,37,38 35,39,40 | 3 P00774,P20766,P36860                                                                     |
| 4886 | 1,4,5,6,33, 2,3,7,8,34,<br>36,37,39 35,38,40 | 5 P00774,P11883,P20766,P35280,P36860                                                       |
| 4887 | 1,4,5,6,33, 2,3,7,8,34,<br>36,37,40 35,38,39 | 7 O08815,P11883,P20766,P25809,P35280,P36860,Q9EQS0                                         |
| 4888 | 1,4,5,6,33, 2,3,7,8,34,<br>36,38,39 35,37,40 | 3 P36860,P62804,Q923V8                                                                     |

|      |                                              |                                                           |
|------|----------------------------------------------|-----------------------------------------------------------|
| 4889 | 1,4,5,6,33, 2,3,7,8,34,<br>36,38,40 35,37,39 | 5 P20766,P25809,P36860,Q03191,Q923V8                      |
| 4890 | 1,4,5,6,33, 2,3,7,8,34,<br>36,39,40 35,37,38 | 5 P25809,P35280,P36860,P62804,Q9EQS0                      |
| 4891 | 1,4,5,6,33, 2,3,7,8,34,<br>37,38,39 35,36,40 | 2 P20766,P36860                                           |
| 4892 | 1,4,5,6,33, 2,3,7,8,34,<br>37,38,40 35,36,39 | 4 P20766,P25809,P36860,Q9Z1F2                             |
| 4893 | 1,4,5,6,33, 2,3,7,8,34,<br>37,39,40 35,36,38 | 4 P20766,P25809,P35280,P36860                             |
| 4894 | 1,4,5,6,33, 2,3,7,8,34,<br>38,39,40 35,36,37 | 5 P25031,P25809,P36860,P51740,P62804                      |
| 4895 | 1,4,5,6,34, 2,3,7,8,33,<br>35,36,37 38,39,40 | 8 P02770,P11883,P35280,P55091,Q5RKI1,Q62635,Q64093,Q8CIZ5 |
| 4896 | 1,4,5,6,34, 2,3,7,8,33,<br>35,36,38 37,39,40 | 3 Q5RKI1,Q8VD89,Q9QWN8                                    |
| 4897 | 1,4,5,6,34, 2,3,7,8,33,<br>35,36,39 37,38,40 | 3 P23739,P35280,Q9Z1F2                                    |
| 4898 | 1,4,5,6,34, 2,3,7,8,33,<br>35,36,40 37,38,39 | 7 P02770,P07174,P11883,P35280,Q5RKI1,Q64093,Q9EQS0        |
| 4899 | 1,4,5,6,34, 2,3,7,8,33,<br>35,37,38 36,39,40 | 2 Q5RKI1,Q64093                                           |
| 4900 | 1,4,5,6,34, 2,3,7,8,33,<br>35,37,39 36,38,40 | 1 P35280                                                  |
| 4901 | 1,4,5,6,34, 2,3,7,8,33,<br>35,37,40 36,38,39 | 4 P07174,P35280,Q5RKI1,Q64093                             |
| 4902 | 1,4,5,6,34, 2,3,7,8,33,<br>35,38,39 36,37,40 | 0                                                         |
| 4903 | 1,4,5,6,34, 2,3,7,8,33,<br>35,38,40 36,37,39 | 1 Q5RKI1                                                  |
| 4904 | 1,4,5,6,34, 2,3,7,8,33,<br>35,39,40 36,37,38 | 1 P35280                                                  |
| 4905 | 1,4,5,6,34, 2,3,7,8,33,<br>36,37,38 35,39,40 | 3 P00774,Q4KLZ6,Q5RKI1                                    |
| 4906 | 1,4,5,6,34, 2,3,7,8,33,<br>36,37,39 35,38,40 | 3 P11883,P35280,Q62635                                    |
| 4907 | 1,4,5,6,34, 2,3,7,8,33,<br>36,37,40 35,38,39 | 6 P07174,P11883,P35280,P49134,Q4KLZ6,Q5RKI1               |
| 4908 | 1,4,5,6,34, 2,3,7,8,33,<br>36,38,39 35,37,40 | 1 P36860                                                  |

|      |                                              |                                                                                 |
|------|----------------------------------------------|---------------------------------------------------------------------------------|
| 4909 | 1,4,5,6,34, 2,3,7,8,33,<br>36,38,40 35,37,39 | 3 P36860,Q4KLZ6,Q5RKI1                                                          |
| 4910 | 1,4,5,6,34, 2,3,7,8,33,<br>36,39,40 35,37,38 | 1 P35280                                                                        |
| 4911 | 1,4,5,6,34, 2,3,7,8,33,<br>37,38,39 35,36,40 | 0                                                                               |
| 4912 | 1,4,5,6,34, 2,3,7,8,33,<br>37,38,40 35,36,39 | 3 P49134,Q4KLZ6,Q5RKI1                                                          |
| 4913 | 1,4,5,6,34, 2,3,7,8,33,<br>37,39,40 35,36,38 | 2 P35280,P49134                                                                 |
| 4914 | 1,4,5,6,34, 2,3,7,8,33,<br>38,39,40 35,36,37 | 1 P51740                                                                        |
| 4915 | 1,4,5,6,35, 2,3,7,8,33,<br>36,37,38 34,39,40 | 5 P19218,P20766,Q5RKI1,Q64093,Q8VD89                                            |
| 4916 | 1,4,5,6,35, 2,3,7,8,33,<br>36,37,39 34,38,40 | 4 P20766,P23739,P35280,Q64093                                                   |
| 4917 | 1,4,5,6,35, 2,3,7,8,33,<br>36,37,40 34,38,39 | 11 P07174,P11883,P12368,P19132,P20766,P35280,P46720,P60905,Q5RKI1,Q64093,Q9EQS0 |
| 4918 | 1,4,5,6,35, 2,3,7,8,33,<br>36,38,39 34,37,40 | 1 Q923V8                                                                        |
| 4919 | 1,4,5,6,35, 2,3,7,8,33,<br>36,38,40 34,37,39 | 5 P19814,P20766,Q5RKI1,Q64093,Q923V8                                            |
| 4920 | 1,4,5,6,35, 2,3,7,8,33,<br>36,39,40 34,37,38 | 6 P23739,P35280,P54921,P62804,Q64093,Q9EQS0                                     |
| 4921 | 1,4,5,6,35, 2,3,7,8,33,<br>37,38,39 34,36,40 | 1 P20766                                                                        |
| 4922 | 1,4,5,6,35, 2,3,7,8,33,<br>37,38,40 34,36,39 | 5 P20766,Q5RKI1,Q64093,Q99MH3,Q9QX74                                            |
| 4923 | 1,4,5,6,35, 2,3,7,8,33,<br>37,39,40 34,36,38 | 4 P02625,P20766,P35280,Q64093                                                   |
| 4924 | 1,4,5,6,35, 2,3,7,8,33,<br>38,39,40 34,36,37 | 5 P26772,P51740,P54921,Q6P6R2,Q9QX74                                            |
| 4925 | 1,4,5,6,36, 2,3,7,8,33,<br>37,38,39 34,35,40 | 2 P20766,P36860                                                                 |
| 4926 | 1,4,5,6,36, 2,3,7,8,33,<br>37,38,40 34,35,39 | 6 P20766,P25809,P36860,Q4KLZ6,Q5RKI1,Q9QX74                                     |
| 4927 | 1,4,5,6,36, 2,3,7,8,33,<br>37,39,40 34,35,38 | 5 O35547,P20766,P25809,P35280,P36860                                            |
| 4928 | 1,4,5,6,36, 2,3,7,8,33,<br>38,39,40 34,35,37 | 5 P25809,P36860,P51740,P54921,Q923V8                                            |

|      |                                              |                                                                                        |
|------|----------------------------------------------|----------------------------------------------------------------------------------------|
| 4929 | 1,4,5,6,37, 2,3,7,8,33,<br>38,39,40 34,35,36 | 6 O89117,P20766,P25809,P36860,P51740,Q9QX74                                            |
| 4930 | 1,4,5,7,8,3 2,3,6,36,3<br>3,34,35 7,38,39,40 | 4 P06760,P08721,P51740,Q9QX74                                                          |
| 4931 | 1,4,5,7,8,3 2,3,6,35,3<br>3,34,36 7,38,39,40 | 10 O54728,P06760,P08494,P08721,P51740,P55091,P98089,Q62635,Q63751,Q9QX74               |
| 4932 | 1,4,5,7,8,3 2,3,6,35,3<br>3,34,37 6,38,39,40 | 8 P06760,P0C0A9,P22282,P51740,P55091,P98089,Q62635,Q9QX74                              |
| 4933 | 1,4,5,7,8,3 2,3,6,35,3<br>3,34,38 6,37,39,40 | 3 P06760,Q6P6Q2,Q9QX74                                                                 |
| 4934 | 1,4,5,7,8,3 2,3,6,35,3<br>3,34,39 6,37,38,40 | 5 P02651,P06760,Q6AYQ8,Q9QX74,Q9Z0V6                                                   |
| 4935 | 1,4,5,7,8,3 2,3,6,35,3<br>3,34,40 6,37,38,39 | 1 P09656                                                                               |
| 4936 | 1,4,5,7,8,3 2,3,6,34,3<br>3,35,36 7,38,39,40 | 6 O54728,P01681,P08721,P23739,P51740,P97840                                            |
| 4937 | 1,4,5,7,8,3 2,3,6,34,3<br>3,35,37 6,38,39,40 | 2 P48032,P51740                                                                        |
| 4938 | 1,4,5,7,8,3 2,3,6,34,3<br>3,35,38 6,37,39,40 | 0                                                                                      |
| 4939 | 1,4,5,7,8,3 2,3,6,34,3<br>3,35,39 6,37,38,40 | 1 Q4KLZ6                                                                               |
| 4940 | 1,4,5,7,8,3 2,3,6,34,3<br>3,35,40 6,37,38,39 | 1 P01681                                                                               |
| 4941 | 1,4,5,7,8,3 2,3,6,34,3<br>3,36,37 5,38,39,40 | 12 O54728,P00774,P06760,P08723,P0C0A9,P47967,P51740,P55091,P97840,P98089,Q62635,Q63493 |
| 4942 | 1,4,5,7,8,3 2,3,6,34,3<br>3,36,38 5,37,39,40 | 1 O54728                                                                               |
| 4943 | 1,4,5,7,8,3 2,3,6,34,3<br>3,36,39 5,37,38,40 | 2 O54728,P01681                                                                        |
| 4944 | 1,4,5,7,8,3 2,3,6,34,3<br>3,36,40 5,37,38,39 | 2 O54728,P01681                                                                        |
| 4945 | 1,4,5,7,8,3 2,3,6,34,3<br>3,37,38 5,36,39,40 | 1 Q6P6Q2                                                                               |
| 4946 | 1,4,5,7,8,3 2,3,6,34,3<br>3,37,39 5,36,38,40 | 2 P0C0A9,Q6AYQ8                                                                        |
| 4947 | 1,4,5,7,8,3 2,3,6,34,3<br>3,37,40 5,36,38,39 | 2 P0C0A9,Q9QW07                                                                        |
| 4948 | 1,4,5,7,8,3 2,3,6,34,3<br>3,38,39 5,36,37,40 | 3 P19132,Q4G075,Q6P6Q2                                                                 |

|      |                        |                          |                                                                                                   |
|------|------------------------|--------------------------|---------------------------------------------------------------------------------------------------|
| 4949 | 1,4,5,7,8,3<br>3,38,40 | 2,3,6,34,3<br>5,36,37,39 | 1 Q6P6Q2                                                                                          |
| 4950 | 1,4,5,7,8,3<br>3,39,40 | 2,3,6,34,3<br>5,36,37,38 | 0                                                                                                 |
| 4951 | 1,4,5,7,8,3<br>4,35,36 | 2,3,6,33,3<br>7,38,39,40 | 8 P01039,P06760,P51740,P55091,P97840,Q68G31,Q9QX74,Q9Z1F2                                         |
| 4952 | 1,4,5,7,8,3<br>4,35,37 | 2,3,6,33,3<br>6,38,39,40 | 6 P01039,P06760,P22282,P49134,P51740,P55091                                                       |
| 4953 | 1,4,5,7,8,3<br>4,35,38 | 2,3,6,33,3<br>6,37,39,40 | 0                                                                                                 |
| 4954 | 1,4,5,7,8,3<br>4,35,39 | 2,3,6,33,3<br>6,37,38,40 | 4 P63029,Q9WTT6,Q9Z0V6,Q9Z1F2                                                                     |
| 4955 | 1,4,5,7,8,3<br>4,35,40 | 2,3,6,33,3<br>6,37,38,39 | 2 P09656,Q68G31                                                                                   |
| 4956 | 1,4,5,7,8,3<br>4,36,37 | 2,3,6,33,3<br>5,38,39,40 | 13 P01039,P06760,P0C0A9,P22282,P47967,P49134,P51740,P55091,P97840,P98089,Q5I0D1,Q6263<br>5,Q68G31 |
| 4957 | 1,4,5,7,8,3<br>4,36,38 | 2,3,6,33,3<br>5,37,39,40 | 1 P06760                                                                                          |
| 4958 | 1,4,5,7,8,3<br>4,36,39 | 2,3,6,33,3<br>5,37,38,40 | 6 P01039,P06760,P63029,Q68G31,Q9Z0V6,Q9Z1F2                                                       |
| 4959 | 1,4,5,7,8,3<br>4,36,40 | 2,3,6,33,3<br>5,37,38,39 | 2 P49134,Q68G31                                                                                   |
| 4960 | 1,4,5,7,8,3<br>4,37,38 | 2,3,6,33,3<br>5,36,39,40 | 5 P06760,P49134,Q4FZU2,Q6IMF3,Q6P6Q2                                                              |
| 4961 | 1,4,5,7,8,3<br>4,37,39 | 2,3,6,33,3<br>5,36,38,40 | 6 P01039,P06760,P22282,P49134,P63029,Q9Z0V6                                                       |
| 4962 | 1,4,5,7,8,3<br>4,37,40 | 2,3,6,33,3<br>5,36,38,39 | 3 P06760,P13432,P49134                                                                            |
| 4963 | 1,4,5,7,8,3<br>4,38,39 | 2,3,6,33,3<br>5,36,37,40 | 5 P49134,Q4G075,Q6P6Q2,Q9WTT6,Q9Z0V6                                                              |
| 4964 | 1,4,5,7,8,3<br>4,38,40 | 2,3,6,33,3<br>5,36,37,39 | 3 P09656,P49134,Q6P6Q2                                                                            |
| 4965 | 1,4,5,7,8,3<br>4,39,40 | 2,3,6,33,3<br>5,36,37,38 | 4 P09656,P49134,Q68G31,Q9Z0V6                                                                     |
| 4966 | 1,4,5,7,8,3<br>5,36,37 | 2,3,6,33,3<br>4,38,39,40 | 8 F1M3L7,P01039,P19218,P47967,P51740,P55091,P97840,Q5I0D1                                         |
| 4967 | 1,4,5,7,8,3<br>5,36,38 | 2,3,6,33,3<br>4,37,39,40 | 2 P19218,P97840                                                                                   |
| 4968 | 1,4,5,7,8,3<br>5,36,39 | 2,3,6,33,3<br>4,37,38,40 | 5 P01039,P23739,P63029,Q62714,Q9Z1F2                                                              |

|      |                         |                          |   |                                           |
|------|-------------------------|--------------------------|---|-------------------------------------------|
| 4969 | 1,4,5,7,8,3<br>5,36,40  | 2,3,6,33,3<br>4,37,38,39 | 1 | P02793;Q7TP54                             |
| 4970 | 1,4,5,7,8,3<br>5,37,38  | 2,3,6,33,3<br>4,36,39,40 | 3 | P19218,Q99041,Q99MH3                      |
| 4971 | 1,4,5,7,8,3<br>5,37,39  | 2,3,6,33,3<br>4,36,38,40 | 2 | P01039,P63029                             |
| 4972 | 1,4,5,7,8,3<br>5,37,40  | 2,3,6,33,3<br>4,36,38,39 | 2 | Q99041,Q99MH3                             |
| 4973 | 1,4,5,7,8,3<br>5,38,39  | 2,3,6,33,3<br>4,36,37,40 | 0 |                                           |
| 4974 | 1,4,5,7,8,3<br>5,38,40  | 2,3,6,33,3<br>4,36,37,39 | 2 | Q99041,Q99MH3                             |
| 4975 | 1,4,5,7,8,3<br>5,39,40  | 2,3,6,33,3<br>4,36,37,38 | 0 |                                           |
| 4976 | 1,4,5,7,8,3<br>6,37,38  | 2,3,6,33,3<br>4,35,39,40 | 3 | P19218,P97840,Q99MH3                      |
| 4977 | 1,4,5,7,8,3<br>6,37,39  | 2,3,6,33,3<br>4,35,38,40 | 3 | P01039,P63029,P97829                      |
| 4978 | 1,4,5,7,8,3<br>6,37,40  | 2,3,6,33,3<br>4,35,38,39 | 2 | P49134,P97829                             |
| 4979 | 1,4,5,7,8,3<br>6,38,39  | 2,3,6,33,3<br>4,35,37,40 | 0 |                                           |
| 4980 | 1,4,5,7,8,3<br>6,38,40  | 2,3,6,33,3<br>4,35,37,39 | 0 |                                           |
| 4981 | 1,4,5,7,8,3<br>6,39,40  | 2,3,6,33,3<br>4,35,37,38 | 1 | O89117                                    |
| 4982 | 1,4,5,7,8,3<br>7,38,39  | 2,3,6,33,3<br>4,35,36,40 | 6 | D3ZUC6,P49134,Q6P6Q2,Q6PCU2,Q99MH3,Q9Z0J6 |
| 4983 | 1,4,5,7,8,3<br>7,38,40  | 2,3,6,33,3<br>4,35,36,39 | 6 | D3ZUC6,P49134,Q6P6Q2,Q6PCU2,Q99041,Q99MH3 |
| 4984 | 1,4,5,7,8,3<br>7,39,40  | 2,3,6,33,3<br>4,35,36,38 | 5 | D3ZUC6,O89117,P21674,P49134,P63029        |
| 4985 | 1,4,5,7,8,3<br>8,39,40  | 2,3,6,33,3<br>4,35,36,37 | 5 | D3ZUC6,O89117,Q6P6Q2,Q6PCU2,Q99MH3        |
| 4986 | 1,4,5,7,33,<br>34,35,36 | 2,3,6,8,37,<br>38,39,40  | 5 | P08494,P08721,P51740,P97840,Q62635        |
| 4987 | 1,4,5,7,33,<br>34,35,37 | 2,3,6,8,36,<br>38,39,40  | 5 | P08721,P51740,Q5BJY9,Q62635,Q8CIZ5        |
| 4988 | 1,4,5,7,33,<br>34,35,38 | 2,3,6,8,36,<br>37,39,40  | 3 | P08721,P80299,Q9R168                      |



|      |                                              |                                                                                 |
|------|----------------------------------------------|---------------------------------------------------------------------------------|
| 4989 | 1,4,5,7,33, 2,3,6,8,36,<br>34,35,39 37,38,40 | 1 P12020                                                                        |
| 4990 | 1,4,5,7,33, 2,3,6,8,36,<br>34,35,40 37,38,39 | 0                                                                               |
| 4991 | 1,4,5,7,33, 2,3,6,8,35,<br>34,36,37 38,39,40 | 11 P00774,P08721,P11883,P36376,P47967,P51740,P55091,P97840,P98089,Q5EGZ1,Q62635 |
| 4992 | 1,4,5,7,33, 2,3,6,8,35,<br>34,36,38 37,39,40 | 2 P08721,P80299                                                                 |
| 4993 | 1,4,5,7,33, 2,3,6,8,35,<br>34,36,39 37,38,40 | 2 P08494,P08721                                                                 |
| 4994 | 1,4,5,7,33, 2,3,6,8,35,<br>34,36,40 37,38,39 | 2 P08494,P08721                                                                 |
| 4995 | 1,4,5,7,33, 2,3,6,8,35,<br>34,37,38 36,39,40 | 1 P36376                                                                        |
| 4996 | 1,4,5,7,33, 2,3,6,8,35,<br>34,37,39 36,38,40 | 1 Q6AYQ8                                                                        |
| 4997 | 1,4,5,7,33, 2,3,6,8,35,<br>34,37,40 36,38,39 | 0                                                                               |
| 4998 | 1,4,5,7,33, 2,3,6,8,35,<br>34,38,39 36,37,40 | 1 P19132                                                                        |
| 4999 | 1,4,5,7,33, 2,3,6,8,35,<br>34,38,40 36,37,39 | 0                                                                               |
| 5000 | 1,4,5,7,33, 2,3,6,8,35,<br>34,39,40 36,37,38 | 1 P09656                                                                        |
| 5001 | 1,4,5,7,33, 2,3,6,8,34,<br>35,36,37 38,39,40 | 7 D4A5U3,P08721,P47967,P51740,P55091,P97840,Q8CIZ5                              |
| 5002 | 1,4,5,7,33, 2,3,6,8,34,<br>35,36,38 37,39,40 | 4 P08721,P97840,Q03191,Q923V8                                                   |
| 5003 | 1,4,5,7,33, 2,3,6,8,34,<br>35,36,39 37,38,40 | 1 P23739                                                                        |
| 5004 | 1,4,5,7,33, 2,3,6,8,34,<br>35,36,40 37,38,39 | 2 P01681,Q9EQS0                                                                 |
| 5005 | 1,4,5,7,33, 2,3,6,8,34,<br>35,37,38 36,39,40 | 1 P08649                                                                        |
| 5006 | 1,4,5,7,33, 2,3,6,8,34,<br>35,37,39 36,38,40 | 0                                                                               |
| 5007 | 1,4,5,7,33, 2,3,6,8,34,<br>35,37,40 36,38,39 | 0                                                                               |
| 5008 | 1,4,5,7,33, 2,3,6,8,34,<br>35,38,39 36,37,40 | 1 P70502                                                                        |

|      |                                              |                                                           |
|------|----------------------------------------------|-----------------------------------------------------------|
| 5009 | 1,4,5,7,33, 2,3,6,8,34,<br>35,38,40 36,37,39 | 1 P08649                                                  |
| 5010 | 1,4,5,7,33, 2,3,6,8,34,<br>35,39,40 36,37,38 | 1 P02625                                                  |
| 5011 | 1,4,5,7,33, 2,3,6,8,34,<br>36,37,38 35,39,40 | 4 P00774,P36376,P36860,P97840                             |
| 5012 | 1,4,5,7,33, 2,3,6,8,34,<br>36,37,39 35,38,40 | 1 P00774                                                  |
| 5013 | 1,4,5,7,33, 2,3,6,8,34,<br>36,37,40 35,38,39 | 5 O08815,P25809,P36376,P36860,P97840                      |
| 5014 | 1,4,5,7,33, 2,3,6,8,34,<br>36,38,39 35,37,40 | 3 P36860,Q03191,Q923V8                                    |
| 5015 | 1,4,5,7,33, 2,3,6,8,34,<br>36,38,40 35,37,39 | 4 P25809,P36860,Q03191,Q923V8                             |
| 5016 | 1,4,5,7,33, 2,3,6,8,34,<br>36,39,40 35,37,38 | 3 P01681,P25809,P36860                                    |
| 5017 | 1,4,5,7,33, 2,3,6,8,34,<br>37,38,39 35,36,40 | 0                                                         |
| 5018 | 1,4,5,7,33, 2,3,6,8,34,<br>37,38,40 35,36,39 | 1 P08649                                                  |
| 5019 | 1,4,5,7,33, 2,3,6,8,34,<br>37,39,40 35,36,38 | 4 P02625,P21674,P25809,Q6AYQ8                             |
| 5020 | 1,4,5,7,33, 2,3,6,8,34,<br>38,39,40 35,36,37 | 1 P36860                                                  |
| 5021 | 1,4,5,7,34, 2,3,6,8,33,<br>35,36,37 38,39,40 | 8 P01039,P25031,P47967,P51740,P55091,P97840,Q5I0D1,Q62635 |
| 5022 | 1,4,5,7,34, 2,3,6,8,33,<br>35,36,38 37,39,40 | 2 P97840,Q9QWN8                                           |
| 5023 | 1,4,5,7,34, 2,3,6,8,33,<br>35,36,39 37,38,40 | 3 P23739,Q68G31,Q9Z1F2                                    |
| 5024 | 1,4,5,7,34, 2,3,6,8,33,<br>35,36,40 37,38,39 | 1 Q68G31                                                  |
| 5025 | 1,4,5,7,34, 2,3,6,8,33,<br>35,37,38 36,39,40 | 1 Q99MH3                                                  |
| 5026 | 1,4,5,7,34, 2,3,6,8,33,<br>35,37,39 36,38,40 | 1 P63029                                                  |
| 5027 | 1,4,5,7,34, 2,3,6,8,33,<br>35,37,40 36,38,39 | 1 Q99MH3                                                  |
| 5028 | 1,4,5,7,34, 2,3,6,8,33,<br>35,38,39 36,37,40 | 0                                                         |

|      |                                              |                                      |
|------|----------------------------------------------|--------------------------------------|
| 5029 | 1,4,5,7,34, 2,3,6,8,33,<br>35,38,40 36,37,39 | 1 Q99MH3                             |
| 5030 | 1,4,5,7,34, 2,3,6,8,33,<br>35,39,40 36,37,38 | 2 P09656,P10758                      |
| 5031 | 1,4,5,7,34, 2,3,6,8,33,<br>36,37,38 35,39,40 | 2 P36376,P97840                      |
| 5032 | 1,4,5,7,34, 2,3,6,8,33,<br>36,37,39 35,38,40 | 2 P01039,P63029                      |
| 5033 | 1,4,5,7,34, 2,3,6,8,33,<br>36,37,40 35,38,39 | 4 P36376,P49134,P97840,Q68G31        |
| 5034 | 1,4,5,7,34, 2,3,6,8,33,<br>36,38,39 35,37,40 | 0                                    |
| 5035 | 1,4,5,7,34, 2,3,6,8,33,<br>36,38,40 35,37,39 | 0                                    |
| 5036 | 1,4,5,7,34, 2,3,6,8,33,<br>36,39,40 35,37,38 | 1 Q68G31                             |
| 5037 | 1,4,5,7,34, 2,3,6,8,33,<br>37,38,39 35,36,40 | 1 P49134                             |
| 5038 | 1,4,5,7,34, 2,3,6,8,33,<br>37,38,40 35,36,39 | 3 P49134,Q4KLZ6,Q99MH3               |
| 5039 | 1,4,5,7,34, 2,3,6,8,33,<br>37,39,40 35,36,38 | 1 P49134                             |
| 5040 | 1,4,5,7,34, 2,3,6,8,33,<br>38,39,40 35,36,37 | 2 P09656,P10758                      |
| 5041 | 1,4,5,7,35, 2,3,6,8,33,<br>36,37,38 34,39,40 | 3 P19218,P97840,Q99MH3               |
| 5042 | 1,4,5,7,35, 2,3,6,8,33,<br>36,37,39 34,38,40 | 4 P01039,P23739,P63029,P97840        |
| 5043 | 1,4,5,7,35, 2,3,6,8,33,<br>36,37,40 34,38,39 | 4 P02793;Q7TP54,P19132,P97840,Q99MH3 |
| 5044 | 1,4,5,7,35, 2,3,6,8,33,<br>36,38,39 34,37,40 | 1 P23739                             |
| 5045 | 1,4,5,7,35, 2,3,6,8,33,<br>36,38,40 34,37,39 | 2 Q99MH3,Q9QWN8                      |
| 5046 | 1,4,5,7,35, 2,3,6,8,33,<br>36,39,40 34,37,38 | 3 O89117,P02625,P23739               |
| 5047 | 1,4,5,7,35, 2,3,6,8,33,<br>37,38,39 34,36,40 | 2 P08649,Q99MH3                      |
| 5048 | 1,4,5,7,35, 2,3,6,8,33,<br>37,38,40 34,36,39 | 2 P08649,Q99MH3                      |

|      |                                              |    |                                                                       |
|------|----------------------------------------------|----|-----------------------------------------------------------------------|
| 5049 | 1,4,5,7,35, 2,3,6,8,33,<br>37,39,40 34,36,38 | 4  | O89117,P02625,P08649,Q99MH3                                           |
| 5050 | 1,4,5,7,35, 2,3,6,8,33,<br>38,39,40 34,36,37 | 5  | O89117,P08649,P10758,P26772,Q99MH3                                    |
| 5051 | 1,4,5,7,36, 2,3,6,8,33,<br>37,38,39 34,35,40 | 1  | O89117                                                                |
| 5052 | 1,4,5,7,36, 2,3,6,8,33,<br>37,38,40 34,35,39 | 2  | P36860,Q99MH3                                                         |
| 5053 | 1,4,5,7,36, 2,3,6,8,33,<br>37,39,40 34,35,38 | 3  | O89117,P02625,P25809                                                  |
| 5054 | 1,4,5,7,36, 2,3,6,8,33,<br>38,39,40 34,35,37 | 3  | O89117,P25809,P36860                                                  |
| 5055 | 1,4,5,7,37, 2,3,6,8,33,<br>38,39,40 34,35,36 | 7  | D3ZUC6,O89117,P08649,P26772,P49134,Q5I0D7,Q99MH3                      |
| 5056 | 1,4,5,8,33, 2,3,6,7,37,<br>34,35,36 38,39,40 | 10 | O54728,P01681,P01835,P08494,P08721,P23739,P51740,Q5QE79,Q6AY61,Q9QX74 |
| 5057 | 1,4,5,8,33, 2,3,6,7,36,<br>34,35,37 38,39,40 | 1  | P51740                                                                |
| 5058 | 1,4,5,8,33, 2,3,6,7,36,<br>34,35,38 37,39,40 | 1  | P01835                                                                |
| 5059 | 1,4,5,8,33, 2,3,6,7,36,<br>34,35,39 37,38,40 | 2  | P01835,Q9Z0V6                                                         |
| 5060 | 1,4,5,8,33, 2,3,6,7,36,<br>34,35,40 37,38,39 | 1  | P01835                                                                |
| 5061 | 1,4,5,8,33, 2,3,6,7,35,<br>34,36,37 38,39,40 | 10 | O54728,P00774,P06760,P08723,P13432,P51740,P55091,P98089,Q5QE79,Q62635 |
| 5062 | 1,4,5,8,33, 2,3,6,7,35,<br>34,36,38 37,39,40 | 1  | O54728                                                                |
| 5063 | 1,4,5,8,33, 2,3,6,7,35,<br>34,36,39 37,38,40 | 5  | O54728,P01681,P08494,P23739,Q9QX74                                    |
| 5064 | 1,4,5,8,33, 2,3,6,7,35,<br>34,36,40 37,38,39 | 4  | O54728,P01681,P08494,P13432                                           |
| 5065 | 1,4,5,8,33, 2,3,6,7,35,<br>34,37,38 36,39,40 | 4  | P06760,Q4FZU2,Q6IMF3,Q6P6Q2                                           |
| 5066 | 1,4,5,8,33, 2,3,6,7,35,<br>34,37,39 36,38,40 | 2  | P02793;Q7TP54,Q9QWN8                                                  |
| 5067 | 1,4,5,8,33, 2,3,6,7,35,<br>34,37,40 36,38,39 | 1  | P13432                                                                |
| 5068 | 1,4,5,8,33, 2,3,6,7,35,<br>34,38,39 36,37,40 | 3  | P02793;Q7TP54,P19132,Q6P6Q2                                           |

|      |                                              |                                                    |
|------|----------------------------------------------|----------------------------------------------------|
| 5069 | 1,4,5,8,33, 2,3,6,7,35,<br>34,38,40 36,37,39 | 1 Q6P6Q2                                           |
| 5070 | 1,4,5,8,33, 2,3,6,7,35,<br>34,39,40 36,37,38 | 2 P09656,P13432                                    |
| 5071 | 1,4,5,8,33, 2,3,6,7,34,<br>35,36,37 38,39,40 | 7 F1M3L7,O54728,P01681,P20766,P51740,P55091,Q6AY61 |
| 5072 | 1,4,5,8,33, 2,3,6,7,34,<br>35,36,38 37,39,40 | 5 O54728,P01681,P01835,P20766,Q6AY61               |
| 5073 | 1,4,5,8,33, 2,3,6,7,34,<br>35,36,39 37,38,40 | 7 O54728,P01681,P01835,P20767,P23739,Q62714,Q6AY61 |
| 5074 | 1,4,5,8,33, 2,3,6,7,34,<br>35,36,40 37,38,39 | 5 O54728,P01681,P01835,P20766,Q6AY61               |
| 5075 | 1,4,5,8,33, 2,3,6,7,34,<br>35,37,38 36,39,40 | 1 P20766                                           |
| 5076 | 1,4,5,8,33, 2,3,6,7,34,<br>35,37,39 36,38,40 | 1 P20766                                           |
| 5077 | 1,4,5,8,33, 2,3,6,7,34,<br>35,37,40 36,38,39 | 1 P20766                                           |
| 5078 | 1,4,5,8,33, 2,3,6,7,34,<br>35,38,39 36,37,40 | 1 P01835                                           |
| 5079 | 1,4,5,8,33, 2,3,6,7,34,<br>35,38,40 36,37,39 | 2 P01835,P20766                                    |
| 5080 | 1,4,5,8,33, 2,3,6,7,34,<br>35,39,40 36,37,38 | 2 P01681,P01835                                    |
| 5081 | 1,4,5,8,33, 2,3,6,7,34,<br>36,37,38 35,39,40 | 2 O54728,P20766                                    |
| 5082 | 1,4,5,8,33, 2,3,6,7,34,<br>36,37,39 35,38,40 | 3 O54728,P20766,Q62812                             |
| 5083 | 1,4,5,8,33, 2,3,6,7,34,<br>36,37,40 35,38,39 | 5 O08815,O54728,P01681,P13432,P20766               |
| 5084 | 1,4,5,8,33, 2,3,6,7,34,<br>36,38,39 35,37,40 | 3 O54728,P01681,P19132                             |
| 5085 | 1,4,5,8,33, 2,3,6,7,34,<br>36,38,40 35,37,39 | 3 O54728,P01681,P20766                             |
| 5086 | 1,4,5,8,33, 2,3,6,7,34,<br>36,39,40 35,37,38 | 2 O54728,P01681                                    |
| 5087 | 1,4,5,8,33, 2,3,6,7,34,<br>37,38,39 35,36,40 | 2 P20766,Q6P6Q2                                    |
| 5088 | 1,4,5,8,33, 2,3,6,7,34,<br>37,38,40 35,36,39 | 2 P20766,Q6P6Q2                                    |

|      |                                              |                                                    |
|------|----------------------------------------------|----------------------------------------------------|
| 5089 | 1,4,5,8,33, 2,3,6,7,34,<br>37,39,40 35,36,38 | 3 P20766,P21674,Q9QWN8                             |
| 5090 | 1,4,5,8,33, 2,3,6,7,34,<br>38,39,40 35,36,37 | 3 P19132,P25031,Q6P6Q2                             |
| 5091 | 1,4,5,8,34, 2,3,6,7,33,<br>35,36,37 38,39,40 | 5 F1M3L7,P01039,P51740,P55091,Q5RKI1               |
| 5092 | 1,4,5,8,34, 2,3,6,7,33,<br>35,36,38 37,39,40 | 1 Q5RKI1                                           |
| 5093 | 1,4,5,8,34, 2,3,6,7,33,<br>35,36,39 37,38,40 | 5 P01039,P23739,Q62714,Q6AY61,Q9Z1F2               |
| 5094 | 1,4,5,8,34, 2,3,6,7,33,<br>35,36,40 37,38,39 | 4 P07174,P13432,Q5RKI1,Q6AY61                      |
| 5095 | 1,4,5,8,34, 2,3,6,7,33,<br>35,37,38 36,39,40 | 2 Q5RKI1,Q6P6Q2                                    |
| 5096 | 1,4,5,8,34, 2,3,6,7,33,<br>35,37,39 36,38,40 | 2 P01039,Q9Z0V6                                    |
| 5097 | 1,4,5,8,34, 2,3,6,7,33,<br>35,37,40 36,38,39 | 3 P13432,P49134,Q5RKI1                             |
| 5098 | 1,4,5,8,34, 2,3,6,7,33,<br>35,38,39 36,37,40 | 1 Q9Z0V6                                           |
| 5099 | 1,4,5,8,34, 2,3,6,7,33,<br>35,38,40 36,37,39 | 4 P15399,P97580,Q30KJ2,Q5RKI1                      |
| 5100 | 1,4,5,8,34, 2,3,6,7,33,<br>35,39,40 36,37,38 | 2 P09656,P15399                                    |
| 5101 | 1,4,5,8,34, 2,3,6,7,33,<br>36,37,38 35,39,40 | 2 Q5RKI1,Q6P6Q2                                    |
| 5102 | 1,4,5,8,34, 2,3,6,7,33,<br>36,37,39 35,38,40 | 3 P01039,P13432,P63029                             |
| 5103 | 1,4,5,8,34, 2,3,6,7,33,<br>36,37,40 35,38,39 | 4 P07174,P13432,P49134,Q5RKI1                      |
| 5104 | 1,4,5,8,34, 2,3,6,7,33,<br>36,38,39 35,37,40 | 0                                                  |
| 5105 | 1,4,5,8,34, 2,3,6,7,33,<br>36,38,40 35,37,39 | 1 Q5RKI1                                           |
| 5106 | 1,4,5,8,34, 2,3,6,7,33,<br>36,39,40 35,37,38 | 1 P13432                                           |
| 5107 | 1,4,5,8,34, 2,3,6,7,33,<br>37,38,39 35,36,40 | 3 P49134,Q4FZU2,Q6P6Q2                             |
| 5108 | 1,4,5,8,34, 2,3,6,7,33,<br>37,38,40 35,36,39 | 7 P49134,Q4FZU2,Q4KLZ6,Q5RKI1,Q6IMF3,Q6P6Q2,Q99MH3 |

|      |                                              |    |                                                                       |
|------|----------------------------------------------|----|-----------------------------------------------------------------------|
| 5109 | 1,4,5,8,34, 2,3,6,7,33,<br>37,39,40 35,36,38 | 2  | P13432,P49134                                                         |
| 5110 | 1,4,5,8,34, 2,3,6,7,33,<br>38,39,40 35,36,37 | 6  | P09656,P15399,P49134,P97580,Q30KJ2,Q6P6Q2                             |
| 5111 | 1,4,5,8,35, 2,3,6,7,33,<br>36,37,38 34,39,40 | 5  | F1M3L7,P01039,P19218,P20766,Q5RKI1                                    |
| 5112 | 1,4,5,8,35, 2,3,6,7,33,<br>36,37,39 34,38,40 | 8  | F1M3L7,P01039,P20766,P23739,P50116,P63029,P80299,P97829               |
| 5113 | 1,4,5,8,35, 2,3,6,7,33,<br>36,37,40 34,38,39 | 7  | F1M3L7,P07174,P07861,P20766,P60905,P80299,Q5RKI1                      |
| 5114 | 1,4,5,8,35, 2,3,6,7,33,<br>36,38,39 34,37,40 | 3  | P23739,Q62714,Q6AY61                                                  |
| 5115 | 1,4,5,8,35, 2,3,6,7,33,<br>36,38,40 34,37,39 | 3  | P20766,Q5RKI1,Q6AY61                                                  |
| 5116 | 1,4,5,8,35, 2,3,6,7,33,<br>36,39,40 34,37,38 | 3  | P23739,P54921,Q6AY61                                                  |
| 5117 | 1,4,5,8,35, 2,3,6,7,33,<br>37,38,39 34,36,40 | 2  | P20766,Q99MH3                                                         |
| 5118 | 1,4,5,8,35, 2,3,6,7,33,<br>37,38,40 34,36,39 | 4  | P20766,Q5RKI1,Q6P6Q2,Q99MH3                                           |
| 5119 | 1,4,5,8,35, 2,3,6,7,33,<br>37,39,40 34,36,38 | 2  | P20766,P80299                                                         |
| 5120 | 1,4,5,8,35, 2,3,6,7,33,<br>38,39,40 34,36,37 | 3  | P54921,P98089,Q99MH3                                                  |
| 5121 | 1,4,5,8,36, 2,3,6,7,33,<br>37,38,39 34,35,40 | 1  | P20766                                                                |
| 5122 | 1,4,5,8,36, 2,3,6,7,33,<br>37,38,40 34,35,39 | 3  | P20766,Q5RKI1,Q99MH3                                                  |
| 5123 | 1,4,5,8,36, 2,3,6,7,33,<br>37,39,40 34,35,38 | 3  | P20766,P80299,P97829                                                  |
| 5124 | 1,4,5,8,36, 2,3,6,7,33,<br>38,39,40 34,35,37 | 2  | O89117,P54921                                                         |
| 5125 | 1,4,5,8,37, 2,3,6,7,33,<br>38,39,40 34,35,36 | 9  | D3ZUC6,O89117,P08721,P20766,P49134,Q5I0D7,Q6P6Q2,Q6PCU2,Q99MH3        |
| 5126 | 1,4,5,33,3 2,3,6,7,8,3<br>4,35,36,37 8,39,40 | 10 | D4A5U3,P11883,P20766,P35280,P50115,P51740,P55091,Q5QE79,Q62635,Q8CIZ5 |
| 5127 | 1,4,5,33,3 2,3,6,7,8,3<br>4,35,36,38 7,39,40 | 2  | P08721,Q03191                                                         |
| 5128 | 1,4,5,33,3 2,3,6,7,8,3<br>4,35,36,39 7,38,40 | 3  | P08494,P23739,P35280                                                  |

|      |                                              |                                                    |
|------|----------------------------------------------|----------------------------------------------------|
| 5129 | 1,4,5,33,3 2,3,6,7,8,3<br>4,35,36,40 7,38,39 | 6 P01681,P08494,P11883,P35280,Q5QE79,Q9EQS0        |
| 5130 | 1,4,5,33,3 2,3,6,7,8,3<br>4,35,37,38 6,39,40 | 2 B0BNN3,P20766                                    |
| 5131 | 1,4,5,33,3 2,3,6,7,8,3<br>4,35,37,39 6,38,40 | 2 P35280,P50115                                    |
| 5132 | 1,4,5,33,3 2,3,6,7,8,3<br>4,35,37,40 6,38,39 | 3 P20766,P35280,P50115                             |
| 5133 | 1,4,5,33,3 2,3,6,7,8,3<br>4,35,38,39 6,37,40 | 2 P19132,P70502                                    |
| 5134 | 1,4,5,33,3 2,3,6,7,8,3<br>4,35,38,40 6,37,39 | 0                                                  |
| 5135 | 1,4,5,33,3 2,3,6,7,8,3<br>4,35,39,40 6,37,38 | 1 P35280                                           |
| 5136 | 1,4,5,33,3 2,3,6,7,8,3<br>4,36,37,38 5,39,40 | 4 P00774,P20766,P36376,P36860                      |
| 5137 | 1,4,5,33,3 2,3,6,7,8,3<br>4,36,37,39 5,38,40 | 5 O70417,P00774,P35280,P36374,Q62635               |
| 5138 | 1,4,5,33,3 2,3,6,7,8,3<br>4,36,37,40 5,38,39 | 6 P11883,P20766,P35280,P36374,P36860,Q5QE79        |
| 5139 | 1,4,5,33,3 2,3,6,7,8,3<br>4,36,38,39 5,37,40 | 2 P19132,P36860                                    |
| 5140 | 1,4,5,33,3 2,3,6,7,8,3<br>4,36,38,40 5,37,39 | 1 P36860                                           |
| 5141 | 1,4,5,33,3 2,3,6,7,8,3<br>4,36,39,40 5,37,38 | 2 P35280,P36860                                    |
| 5142 | 1,4,5,33,3 2,3,6,7,8,3<br>4,37,38,39 5,36,40 | 1 P02793;Q7TP54                                    |
| 5143 | 1,4,5,33,3 2,3,6,7,8,3<br>4,37,38,40 5,36,39 | 2 P20766,Q4KLZ6                                    |
| 5144 | 1,4,5,33,3 2,3,6,7,8,3<br>4,37,39,40 5,36,38 | 3 O70417,P19218,P35280                             |
| 5145 | 1,4,5,33,3 2,3,6,7,8,3<br>4,38,39,40 5,36,37 | 2 P19132,P36860                                    |
| 5146 | 1,4,5,33,3 2,3,6,7,8,3<br>5,36,37,38 4,39,40 | 1 P20766                                           |
| 5147 | 1,4,5,33,3 2,3,6,7,8,3<br>5,36,37,39 4,38,40 | 3 P20766,P23739,P35280                             |
| 5148 | 1,4,5,33,3 2,3,6,7,8,3<br>5,36,37,40 4,38,39 | 7 P07174,P11883,P20766,P35280,P50115,P60905,Q9EQS0 |



|      |                                              |                                             |
|------|----------------------------------------------|---------------------------------------------|
| 5149 | 1,4,5,33,3 2,3,6,7,8,3<br>5,36,38,39 4,37,40 | 5 P20766,P23739,P62804,Q03191,Q923V8        |
| 5150 | 1,4,5,33,3 2,3,6,7,8,3<br>5,36,38,40 4,37,39 | 3 P01681,P20766,Q03191                      |
| 5151 | 1,4,5,33,3 2,3,6,7,8,3<br>5,36,39,40 4,37,38 | 6 P01681,P20766,P23739,P35280,P62804,Q9EQS0 |
| 5152 | 1,4,5,33,3 2,3,6,7,8,3<br>5,37,38,39 4,36,40 | 3 P20766,P70502,P97615                      |
| 5153 | 1,4,5,33,3 2,3,6,7,8,3<br>5,37,38,40 4,36,39 | 4 P08649,P20766,P97615,Q9Z1F2               |
| 5154 | 1,4,5,33,3 2,3,6,7,8,3<br>5,37,39,40 4,36,38 | 4 P02625,P20766,P35280,P50115               |
| 5155 | 1,4,5,33,3 2,3,6,7,8,3<br>5,38,39,40 4,36,37 | 4 P08649,P20766,P62804,P70502               |
| 5156 | 1,4,5,33,3 2,3,6,7,8,3<br>6,37,38,39 4,35,40 | 2 P20766,P36860                             |
| 5157 | 1,4,5,33,3 2,3,6,7,8,3<br>6,37,38,40 4,35,39 | 2 P20766,P36860                             |
| 5158 | 1,4,5,33,3 2,3,6,7,8,3<br>6,37,39,40 4,35,38 | 6 O70417,P20766,P25809,P35280,P36374,P36860 |
| 5159 | 1,4,5,33,3 2,3,6,7,8,3<br>6,38,39,40 4,35,37 | 4 P20766,P25809,P36860,Q03191               |
| 5160 | 1,4,5,33,3 2,3,6,7,8,3<br>7,38,39,40 4,35,36 | 3 P08649,P20766,P36860                      |
| 5161 | 1,4,5,34,3 2,3,6,7,8,3<br>5,36,37,38 3,39,40 | 4 P20766,P80202,Q4KLZ6,Q5RKI1               |
| 5162 | 1,4,5,34,3 2,3,6,7,8,3<br>5,36,37,39 3,38,40 | 5 P01039,P23739,P25031,P35280,P50115        |
| 5163 | 1,4,5,34,3 2,3,6,7,8,3<br>5,36,37,40 3,38,39 | 6 P07174,P11883,P20766,P35280,P50115,Q5RKI1 |
| 5164 | 1,4,5,34,3 2,3,6,7,8,3<br>5,36,38,39 3,37,40 | 1 P23739                                    |
| 5165 | 1,4,5,34,3 2,3,6,7,8,3<br>5,36,38,40 3,37,39 | 1 Q5RKI1                                    |
| 5166 | 1,4,5,34,3 2,3,6,7,8,3<br>5,36,39,40 3,37,38 | 3 P23739,P35280,P50115                      |
| 5167 | 1,4,5,34,3 2,3,6,7,8,3<br>5,37,38,39 3,36,40 | 1 P80202                                    |
| 5168 | 1,4,5,34,3 2,3,6,7,8,3<br>5,37,38,40 3,36,39 | 5 P08649,P20766,Q4KLZ6,Q5RKI1,Q99MH3        |

|      |                          |                          |    |                                                                                                                                      |
|------|--------------------------|--------------------------|----|--------------------------------------------------------------------------------------------------------------------------------------|
| 5169 | 1,4,5,34,3<br>5,37,39,40 | 2,3,6,7,8,3<br>3,36,38   | 3  | O70417,P35280,P50115                                                                                                                 |
| 5170 | 1,4,5,34,3<br>5,38,39,40 | 2,3,6,7,8,3<br>3,36,37   | 0  |                                                                                                                                      |
| 5171 | 1,4,5,34,3<br>6,37,38,39 | 2,3,6,7,8,3<br>3,35,40   | 0  |                                                                                                                                      |
| 5172 | 1,4,5,34,3<br>6,37,38,40 | 2,3,6,7,8,3<br>3,35,39   | 4  | P20766,P36860,Q4KLZ6,Q5RKI1                                                                                                          |
| 5173 | 1,4,5,34,3<br>6,37,39,40 | 2,3,6,7,8,3<br>3,35,38   | 3  | O70417,P35280,P50115                                                                                                                 |
| 5174 | 1,4,5,34,3<br>6,38,39,40 | 2,3,6,7,8,3<br>3,35,37   | 1  | P36860                                                                                                                               |
| 5175 | 1,4,5,34,3<br>7,38,39,40 | 2,3,6,7,8,3<br>3,35,36   | 3  | P49134,Q4KLZ6,Q99MH3                                                                                                                 |
| 5176 | 1,4,5,35,3<br>6,37,38,39 | 2,3,6,7,8,3<br>3,34,40   | 4  | P02631,P20766,P23739,P80202                                                                                                          |
| 5177 | 1,4,5,35,3<br>6,37,38,40 | 2,3,6,7,8,3<br>3,34,39   | 5  | P20766,P80202,Q5RKI1,Q62894,Q99MH3                                                                                                   |
| 5178 | 1,4,5,35,3<br>6,37,39,40 | 2,3,6,7,8,3<br>3,34,38   | 6  | O54800,Q5DWV2,P02625,P20766,P23739,P35280,P50115                                                                                     |
| 5179 | 1,4,5,35,3<br>6,38,39,40 | 2,3,6,7,8,3<br>3,34,37   | 4  | O89117,P02631,P20766,P23739                                                                                                          |
| 5180 | 1,4,5,35,3<br>7,38,39,40 | 2,3,6,7,8,3<br>3,34,36   | 10 | O89117,P02625,P08649,P20766,P26772,P80202,P97615,Q99MH3,Q99PP0,Q9QX74                                                                |
| 5181 | 1,4,5,36,3<br>7,38,39,40 | 2,3,6,7,8,3<br>3,34,35   | 4  | O89117,P20766,P36860,Q99MH3                                                                                                          |
| 5182 | 1,4,6,7,8,3<br>3,34,35   | 2,3,5,36,3<br>7,38,39,40 | 5  | P08721,P11598,P22282,Q63617,Q9QX74                                                                                                   |
| 5183 | 1,4,6,7,8,3<br>3,34,36   | 2,3,5,35,3<br>7,38,39,40 | 15 | G3V686,O54728,O55004,P06761,P08494,P08649,P08721,P11598,P18418,P22282,P98089,Q62635,Q63617,Q9JHB9,Q9QX74                             |
| 5184 | 1,4,6,7,8,3<br>3,34,37   | 2,3,5,35,3<br>6,38,39,40 | 19 | O55004,P06761,P08723,P0C0A9,P11598,P13432,P21674,P22273,P22282,P22283,P98089,Q62635,Q63493,Q63617,Q8CJ52,Q9JHB9,Q9JI85,Q9QW07,Q9QX74 |
| 5185 | 1,4,6,7,8,3<br>3,34,38   | 2,3,5,35,3<br>6,37,39,40 | 2  | P11598,P80299                                                                                                                        |
| 5186 | 1,4,6,7,8,3<br>3,34,39   | 2,3,5,35,3<br>6,37,38,40 | 7  | P02651,P11598,P21674,P22282,Q9QX74,Q9Z0V6,Q9Z1F2                                                                                     |
| 5187 | 1,4,6,7,8,3<br>3,34,40   | 2,3,5,35,3<br>6,37,38,39 | 7  | P11598,P13432,P15399,P21674,P22282,Q9JHB9,Q9QW07                                                                                     |
| 5188 | 1,4,6,7,8,3<br>3,35,36   | 2,3,5,34,3<br>7,38,39,40 | 7  | O54728,P08721,P11598,Q63493,Q63617,Q6AY61,Q920G2                                                                                     |

|      |                        |                          |    |                                                                                                                                                           |
|------|------------------------|--------------------------|----|-----------------------------------------------------------------------------------------------------------------------------------------------------------|
| 5189 | 1,4,6,7,8,3<br>3,35,37 | 2,3,5,34,3<br>6,38,39,40 | 11 | P06761,P08723,P0C0A9,P11598,P22273,P22282,P48032,Q63493,Q63617,Q99041,Q9QW07                                                                              |
| 5190 | 1,4,6,7,8,3<br>3,35,38 | 2,3,5,34,3<br>6,37,39,40 | 3  | O70417,Q63493,Q99041                                                                                                                                      |
| 5191 | 1,4,6,7,8,3<br>3,35,39 | 2,3,5,34,3<br>6,37,38,40 | 1  | Q4KLZ6                                                                                                                                                    |
| 5192 | 1,4,6,7,8,3<br>3,35,40 | 2,3,5,34,3<br>6,37,38,39 | 1  | Q99041                                                                                                                                                    |
| 5193 | 1,4,6,7,8,3<br>3,36,37 | 2,3,5,34,3<br>5,38,39,40 | 20 | O54728,P00774,P06761,P06911,P08723,P0C0A9,P11598,P22273,P22282,P22283,P46462,P55091,P98089,Q62635,Q63493,Q63617,Q6AYR9,Q8CJ52,Q9JI85,Q9QW07               |
| 5194 | 1,4,6,7,8,3<br>3,36,38 | 2,3,5,34,3<br>5,37,39,40 | 4  | O54728,P11598,Q63493,Q63617                                                                                                                               |
| 5195 | 1,4,6,7,8,3<br>3,36,39 | 2,3,5,34,3<br>5,37,38,40 | 4  | O54728,P11598,Q63493,Q63617                                                                                                                               |
| 5196 | 1,4,6,7,8,3<br>3,36,40 | 2,3,5,34,3<br>5,37,38,39 | 6  | O54728,P01681,P06911,P11598,Q63493,Q63617                                                                                                                 |
| 5197 | 1,4,6,7,8,3<br>3,37,38 | 2,3,5,34,3<br>5,36,39,40 | 10 | P06761,P08723,P0C0A9,P11598,P22273,P22282,Q63493,Q63617,Q99041,Q9QW07                                                                                     |
| 5198 | 1,4,6,7,8,3<br>3,37,39 | 2,3,5,34,3<br>5,36,38,40 | 10 | P06761,P0C0A9,P11598,P21674,P22273,P22282,Q63493,Q63617,Q6AYQ8,Q9QW07                                                                                     |
| 5199 | 1,4,6,7,8,3<br>3,37,40 | 2,3,5,34,3<br>5,36,38,39 | 16 | P02782,P06761,P06911,P08723,P0C0A9,P11598,P21674,P22273,P22282,P30120,Q5GRG2,Q63493,Q63617,Q8CJ52,Q99041,Q9QW07                                           |
| 5200 | 1,4,6,7,8,3<br>3,38,39 | 2,3,5,34,3<br>5,36,37,40 | 0  |                                                                                                                                                           |
| 5201 | 1,4,6,7,8,3<br>3,38,40 | 2,3,5,34,3<br>5,36,37,39 | 3  | P22273,P25031,Q99041                                                                                                                                      |
| 5202 | 1,4,6,7,8,3<br>3,39,40 | 2,3,5,34,3<br>5,36,37,38 | 2  | P21674,P22273                                                                                                                                             |
| 5203 | 1,4,6,7,8,3<br>4,35,36 | 2,3,5,33,3<br>7,38,39,40 | 8  | P01039,P11598,P22282,Q63617,Q6AY61,Q99041,Q9JI85,Q9Z1F2                                                                                                   |
| 5204 | 1,4,6,7,8,3<br>4,35,37 | 2,3,5,33,3<br>6,38,39,40 | 10 | P01039,P06761,P0C0A9,P11598,P22273,P22282,Q63617,Q99041,Q9JI85,Q9QW07                                                                                     |
| 5205 | 1,4,6,7,8,3<br>4,35,38 | 2,3,5,33,3<br>6,37,39,40 | 2  | Q30KJ2,Q99041                                                                                                                                             |
| 5206 | 1,4,6,7,8,3<br>4,35,39 | 2,3,5,33,3<br>6,37,38,40 | 3  | P22282,Q9Z0V6,Q9Z1F2                                                                                                                                      |
| 5207 | 1,4,6,7,8,3<br>4,35,40 | 2,3,5,33,3<br>6,37,38,39 | 5  | P15399,P22282,P97580,Q30KJ2,Q99041                                                                                                                        |
| 5208 | 1,4,6,7,8,3<br>4,36,37 | 2,3,5,33,3<br>5,38,39,40 | 22 | P01039,P06761,P06911,P08723,P0C0A9,P11598,P12020,P13432,P22273,P22282,P22283,P46462,P49134,P55091,P98089,Q62635,Q63617,Q6AYR9,Q8CJ52,Q99041,Q9JI85,Q9QW07 |

|      |                        |                          |    |                                                                                                                               |
|------|------------------------|--------------------------|----|-------------------------------------------------------------------------------------------------------------------------------|
| 5209 | 1,4,6,7,8,3<br>4,36,38 | 2,3,5,33,3<br>5,37,39,40 | 3  | P11598,P22282,Q63617                                                                                                          |
| 5210 | 1,4,6,7,8,3<br>4,36,39 | 2,3,5,33,3<br>5,37,38,40 | 5  | P11598,P22282,Q63617,Q9Z0V6,Q9Z1F2                                                                                            |
| 5211 | 1,4,6,7,8,3<br>4,36,40 | 2,3,5,33,3<br>5,37,38,39 | 8  | P11598,P12020,P13432,P15399,P22282,P49134,Q63617,Q99041                                                                       |
| 5212 | 1,4,6,7,8,3<br>4,37,38 | 2,3,5,33,3<br>5,36,39,40 | 9  | P06761,P0C0A9,P11598,P12020,P22273,P22282,P49134,Q63617,Q99041                                                                |
| 5213 | 1,4,6,7,8,3<br>4,37,39 | 2,3,5,33,3<br>5,36,38,40 | 13 | P06761,P0C0A9,P11598,P21674,P22273,P22282,P22283,P49134,P63029,Q63617,Q99041,Q9QW07,Q9Z0V6                                    |
| 5214 | 1,4,6,7,8,3<br>4,37,40 | 2,3,5,33,3<br>5,36,38,39 | 15 | P06761,P0C0A9,P11598,P12020,P13432,P15399,P21674,P22273,P22282,P30120,P49134,Q63617,Q8CJ52,Q99041,Q9QW07                      |
| 5215 | 1,4,6,7,8,3<br>4,38,39 | 2,3,5,33,3<br>5,36,37,40 | 2  | Q30KJ2,Q9Z0V6                                                                                                                 |
| 5216 | 1,4,6,7,8,3<br>4,38,40 | 2,3,5,33,3<br>5,36,37,39 | 5  | P15399,P49134,P97580,Q30KJ2,Q99041                                                                                            |
| 5217 | 1,4,6,7,8,3<br>4,39,40 | 2,3,5,33,3<br>5,36,37,38 | 7  | P15399,P21674,P22282,P49134,P97580,Q30KJ2,Q9Z0V6                                                                              |
| 5218 | 1,4,6,7,8,3<br>5,36,37 | 2,3,5,33,3<br>4,38,39,40 | 18 | P01039,P06761,P0C0A9,P11598,P19132,P19218,P22273,P22282,P22283,P46462,P55091,P97829,Q63617,Q6AY61,Q6AYR9,Q99041,Q9JI85,Q9QW07 |
| 5219 | 1,4,6,7,8,3<br>5,36,38 | 2,3,5,33,3<br>4,37,39,40 | 6  | O70417,P19218,Q63617,Q6AY61,Q8VD89,Q99041                                                                                     |
| 5220 | 1,4,6,7,8,3<br>5,36,39 | 2,3,5,33,3<br>4,37,38,40 | 4  | Q62714,Q63617,Q6AY61,Q9Z1F2                                                                                                   |
| 5221 | 1,4,6,7,8,3<br>5,36,40 | 2,3,5,33,3<br>4,37,38,39 | 6  | P02793;Q7TP54,P19132,Q63617,Q6AY61,Q99041,Q99376                                                                              |
| 5222 | 1,4,6,7,8,3<br>5,37,38 | 2,3,5,33,3<br>4,36,39,40 | 8  | P0C0A9,P11598,P19218,P22273,P22282,Q63617,Q99041,Q99MH3                                                                       |
| 5223 | 1,4,6,7,8,3<br>5,37,39 | 2,3,5,33,3<br>4,36,38,40 | 8  | P01039,P0C0A9,P11598,P22273,P22282,P63029,Q63617,Q99041                                                                       |
| 5224 | 1,4,6,7,8,3<br>5,37,40 | 2,3,5,33,3<br>4,36,38,39 | 8  | P0C0A9,P11598,P19132,P22273,P22282,Q63617,Q99041,Q9QW07                                                                       |
| 5225 | 1,4,6,7,8,3<br>5,38,39 | 2,3,5,33,3<br>4,36,37,40 | 1  | Q99041                                                                                                                        |
| 5226 | 1,4,6,7,8,3<br>5,38,40 | 2,3,5,33,3<br>4,36,37,39 | 2  | Q99041,Q99MH3                                                                                                                 |
| 5227 | 1,4,6,7,8,3<br>5,39,40 | 2,3,5,33,3<br>4,36,37,38 | 2  | P54921,Q99041                                                                                                                 |
| 5228 | 1,4,6,7,8,3<br>6,37,38 | 2,3,5,33,3<br>4,35,39,40 | 15 | P06761,P06911,P0C0A9,P11598,P12020,P19218,P22273,P22282,Q5GRG2,Q5M8C6,Q63474,Q63617,Q6AYR9,Q99041,Q9JI85                      |

|      |                         |                          |    |                                                                                                                                                                                                                  |
|------|-------------------------|--------------------------|----|------------------------------------------------------------------------------------------------------------------------------------------------------------------------------------------------------------------|
| 5229 | 1,4,6,7,8,3<br>6,37,39  | 2,3,5,33,3<br>4,35,38,40 | 17 | P01039,P06761,P06911,P0C0A9,P11598,P12020,P22273,P22282,P22283,P46462,P63029,P9782<br>9,Q5M8C6,Q63617,Q6AYR9,Q812E4,Q9JI85<br>O08815,O35547,P02782,P06761,P06911,P0C0A9,P11598,P12020,P13432,P19132,P19629,P2227 |
| 5230 | 1,4,6,7,8,3<br>6,37,40  | 2,3,5,33,3<br>4,35,38,39 | 28 | 3,P22282,P22283,P30120,P46462,P49134,P97829,Q5GRG2,Q5M8C6,Q63617,Q6AYR9,Q812E4,<br>Q8CJ52,Q99041,Q9JI85,Q9QW07,Q9Z2L0                                                                                            |
| 5231 | 1,4,6,7,8,3<br>6,38,39  | 2,3,5,33,3<br>4,35,37,40 | 2  | P06911,Q63617                                                                                                                                                                                                    |
| 5232 | 1,4,6,7,8,3<br>6,38,40  | 2,3,5,33,3<br>4,35,37,39 | 5  | P06911,P12020,Q5GRG2,Q63617,Q99041                                                                                                                                                                               |
| 5233 | 1,4,6,7,8,3<br>6,39,40  | 2,3,5,33,3<br>4,35,37,38 | 3  | P06911,P54921,Q63617                                                                                                                                                                                             |
| 5234 | 1,4,6,7,8,3<br>7,38,39  | 2,3,5,33,3<br>4,35,36,40 | 8  | P06911,P0C0A9,P11598,P22273,P22282,Q5M8C6,Q63617,Q99041                                                                                                                                                          |
| 5235 | 1,4,6,7,8,3<br>7,38,40  | 2,3,5,33,3<br>4,35,36,39 | 12 | P06911,P0C0A9,P11598,P12020,P22273,P22282,P49134,Q5GRG2,Q63617,Q99041,Q99MH3,Q9<br>QW07                                                                                                                          |
| 5236 | 1,4,6,7,8,3<br>7,39,40  | 2,3,5,33,3<br>4,35,36,38 | 17 | O35547,P02782,P06911,P0C0A9,P11598,P12020,P21674,P22273,P22282,P49134,Q5GRG2,Q5M<br>8C6,Q63617,Q6AYR9,Q812E4,Q99041,Q9QW07                                                                                       |
| 5237 | 1,4,6,7,8,3<br>8,39,40  | 2,3,5,33,3<br>4,35,36,37 | 7  | P06911,P22273,P51740,P54921,Q5I0D7,Q5QE79,Q99041                                                                                                                                                                 |
| 5238 | 1,4,6,7,33,<br>34,35,36 | 2,3,5,8,37,<br>38,39,40  | 6  | D3ZUC6,P08494,P08721,P11598,P11883,P36376                                                                                                                                                                        |
| 5239 | 1,4,6,7,33,<br>34,35,37 | 2,3,5,8,36,<br>38,39,40  | 7  | P08721,P0C0A9,P11598,P36376,Q5BJY9,Q63617,Q9R168                                                                                                                                                                 |
| 5240 | 1,4,6,7,33,<br>34,35,38 | 2,3,5,8,36,<br>37,39,40  | 4  | P08721,P36376,P80299,Q9R168                                                                                                                                                                                      |
| 5241 | 1,4,6,7,33,<br>34,35,39 | 2,3,5,8,36,<br>37,38,40  | 1  | P08721                                                                                                                                                                                                           |
| 5242 | 1,4,6,7,33,<br>34,35,40 | 2,3,5,8,36,<br>37,38,39  | 3  | P08721,P36376,Q9EQS0                                                                                                                                                                                             |
| 5243 | 1,4,6,7,33,<br>34,36,37 | 2,3,5,8,35,<br>38,39,40  | 14 | P00774,P08494,P08721,P08723,P0C0A9,P11598,P11883,P22283,P36376,P55091,P98089,Q6263<br>5,Q63617,Q8CJ52                                                                                                            |
| 5244 | 1,4,6,7,33,<br>34,36,38 | 2,3,5,8,35,<br>37,39,40  | 5  | P08494,P08721,P11598,P36376,P80299                                                                                                                                                                               |
| 5245 | 1,4,6,7,33,<br>34,36,39 | 2,3,5,8,35,<br>37,38,40  | 3  | P08494,P08721,P11598                                                                                                                                                                                             |
| 5246 | 1,4,6,7,33,<br>34,36,40 | 2,3,5,8,35,<br>37,38,39  | 5  | P08494,P08721,P11598,P11883,P36376                                                                                                                                                                               |
| 5247 | 1,4,6,7,33,<br>34,37,38 | 2,3,5,8,35,<br>36,39,40  | 5  | P0C0A9,P11598,P36376,P80299,Q9R168                                                                                                                                                                               |
| 5248 | 1,4,6,7,33,<br>34,37,39 | 2,3,5,8,35,<br>36,38,40  | 4  | P0C0A9,P11598,P21674,Q6AYQ8                                                                                                                                                                                      |

|      |                                              |                                                                                 |
|------|----------------------------------------------|---------------------------------------------------------------------------------|
| 5249 | 1,4,6,7,33, 2,3,5,8,35,<br>34,37,40 36,38,39 | 8 P07647,P0C0A9,P11598,P21674,P24368,P36376,Q8CJ52,Q9QW07                       |
| 5250 | 1,4,6,7,33, 2,3,5,8,35,<br>34,38,39 36,37,40 | 2 F1M3L7,P80299                                                                 |
| 5251 | 1,4,6,7,33, 2,3,5,8,35,<br>34,38,40 36,37,39 | 3 P36376,P80299,Q9QYP1                                                          |
| 5252 | 1,4,6,7,33, 2,3,5,8,35,<br>34,39,40 36,37,38 | 1 P21674                                                                        |
| 5253 | 1,4,6,7,33, 2,3,5,8,34,<br>35,36,37 38,39,40 | 9 P08721,P08723,P0C0A9,P11598,P11883,P12368,P36376,Q63617,Q8CIZ5                |
| 5254 | 1,4,6,7,33, 2,3,5,8,34,<br>35,36,38 37,39,40 | 3 P08721,P36376,Q8VD89                                                          |
| 5255 | 1,4,6,7,33, 2,3,5,8,34,<br>35,36,39 37,38,40 | 1 P08721                                                                        |
| 5256 | 1,4,6,7,33, 2,3,5,8,34,<br>35,36,40 37,38,39 | 4 P08721,P36376,Q920G2,Q9EQS0                                                   |
| 5257 | 1,4,6,7,33, 2,3,5,8,34,<br>35,37,38 36,39,40 | 2 P36376,Q63617                                                                 |
| 5258 | 1,4,6,7,33, 2,3,5,8,34,<br>35,37,39 36,38,40 | 2 P0C0A9,Q63617                                                                 |
| 5259 | 1,4,6,7,33, 2,3,5,8,34,<br>35,37,40 36,38,39 | 3 P36376,Q99041,Q9QW07                                                          |
| 5260 | 1,4,6,7,33, 2,3,5,8,34,<br>35,38,39 36,37,40 | 1 Q6AYR8                                                                        |
| 5261 | 1,4,6,7,33, 2,3,5,8,34,<br>35,38,40 36,37,39 | 1 Q9QYP1                                                                        |
| 5262 | 1,4,6,7,33, 2,3,5,8,34,<br>35,39,40 36,37,38 | 0                                                                               |
| 5263 | 1,4,6,7,33, 2,3,5,8,34,<br>36,37,38 35,39,40 | 8 P00774,P08723,P0C0A9,P11598,P36376,P36860,Q63474,Q63617                       |
| 5264 | 1,4,6,7,33, 2,3,5,8,34,<br>36,37,39 35,38,40 | 6 P00774,P08723,P0C0A9,P11598,P22283,Q63617                                     |
| 5265 | 1,4,6,7,33, 2,3,5,8,34,<br>36,37,40 35,38,39 | 11 O08815,O35547,P08723,P0C0A9,P11598,P11883,P25809,P36376,Q63617,Q8CJ52,Q9QW07 |
| 5266 | 1,4,6,7,33, 2,3,5,8,34,<br>36,38,39 35,37,40 | 2 P36860,Q923V8                                                                 |
| 5267 | 1,4,6,7,33, 2,3,5,8,34,<br>36,38,40 35,37,39 | 3 P25809,P36376,P36860                                                          |
| 5268 | 1,4,6,7,33, 2,3,5,8,34,<br>36,39,40 35,37,38 | 2 P25809,P36860                                                                 |

|      |                                              |                                                                                 |
|------|----------------------------------------------|---------------------------------------------------------------------------------|
| 5269 | 1,4,6,7,33, 2,3,5,8,34,<br>37,38,39 35,36,40 | 1 P11598                                                                        |
| 5270 | 1,4,6,7,33, 2,3,5,8,34,<br>37,38,40 35,36,39 | 3 P11598,P36376,Q9QW07                                                          |
| 5271 | 1,4,6,7,33, 2,3,5,8,34,<br>37,39,40 35,36,38 | 5 P0C0A9,P11598,P21674,P25809,Q9QW07                                            |
| 5272 | 1,4,6,7,33, 2,3,5,8,34,<br>38,39,40 35,36,37 | 4 P25809,P51740,P55091,Q9QYP1                                                   |
| 5273 | 1,4,6,7,34, 2,3,5,8,33,<br>35,36,37 38,39,40 | 10 P01039,P0C0A9,P11598,P11883,P19132,P22283,P36376,P55091,Q63617,Q9JI85        |
| 5274 | 1,4,6,7,34, 2,3,5,8,33,<br>35,36,38 37,39,40 | 2 P36376,Q9QWN8                                                                 |
| 5275 | 1,4,6,7,34, 2,3,5,8,33,<br>35,36,39 37,38,40 | 2 Q5PQL7,Q9Z1F2                                                                 |
| 5276 | 1,4,6,7,34, 2,3,5,8,33,<br>35,36,40 37,38,39 | 2 P36376,Q9EQS0                                                                 |
| 5277 | 1,4,6,7,34, 2,3,5,8,33,<br>35,37,38 36,39,40 | 3 P11598,P36376,Q99041                                                          |
| 5278 | 1,4,6,7,34, 2,3,5,8,33,<br>35,37,39 36,38,40 | 1 P11598                                                                        |
| 5279 | 1,4,6,7,34, 2,3,5,8,33,<br>35,37,40 36,38,39 | 6 P11598,P19132,P36376,Q8CJ52,Q99041,Q9QW07                                     |
| 5280 | 1,4,6,7,34, 2,3,5,8,33,<br>35,38,39 36,37,40 | 0                                                                               |
| 5281 | 1,4,6,7,34, 2,3,5,8,33,<br>35,38,40 36,37,39 | 2 P10758,Q99041                                                                 |
| 5282 | 1,4,6,7,34, 2,3,5,8,33,<br>35,39,40 36,37,38 | 1 P10758                                                                        |
| 5283 | 1,4,6,7,34, 2,3,5,8,33,<br>36,37,38 35,39,40 | 5 P11598,P22283,P36376,Q63474,Q63617                                            |
| 5284 | 1,4,6,7,34, 2,3,5,8,33,<br>36,37,39 35,38,40 | 4 P0C0A9,P11598,P22283,Q63617                                                   |
| 5285 | 1,4,6,7,34, 2,3,5,8,33,<br>36,37,40 35,38,39 | 11 P07647,P0C0A9,P11598,P11883,P19629,P22283,P36376,P49134,Q63617,Q8CJ52,Q9QW07 |
| 5286 | 1,4,6,7,34, 2,3,5,8,33,<br>36,38,39 35,37,40 | 0                                                                               |
| 5287 | 1,4,6,7,34, 2,3,5,8,33,<br>36,38,40 35,37,39 | 1 P36376                                                                        |
| 5288 | 1,4,6,7,34, 2,3,5,8,33,<br>36,39,40 35,37,38 | 0                                                                               |

|      |                                              |                                                                                        |
|------|----------------------------------------------|----------------------------------------------------------------------------------------|
| 5289 | 1,4,6,7,34, 2,3,5,8,33,<br>37,38,39 35,36,40 | 2 P01835,P11598                                                                        |
| 5290 | 1,4,6,7,34, 2,3,5,8,33,<br>37,38,40 35,36,39 | 6 P01835,P11598,P36376,P49134,Q99041,Q9QW07                                            |
| 5291 | 1,4,6,7,34, 2,3,5,8,33,<br>37,39,40 35,36,38 | 4 P11598,P21674,P49134,Q9QW07                                                          |
| 5292 | 1,4,6,7,34, 2,3,5,8,33,<br>38,39,40 35,36,37 | 3 F1M3L7,P10758,P51740                                                                 |
| 5293 | 1,4,6,7,35, 2,3,5,8,33,<br>36,37,38 34,39,40 | 5 P11598,P19218,P36376,Q63617,Q99041                                                   |
| 5294 | 1,4,6,7,35, 2,3,5,8,33,<br>36,37,39 34,38,40 | 3 P01039,P11598,Q63617                                                                 |
| 5295 | 1,4,6,7,35, 2,3,5,8,33,<br>36,37,40 34,38,39 | 11 O35547,P02793;Q7TP54,P11598,P12368,P19132,P36376,P60905,P70549,Q63617,Q99041,Q9QW07 |
| 5296 | 1,4,6,7,35, 2,3,5,8,33,<br>36,38,39 34,37,40 | 1 Q6AYR8                                                                               |
| 5297 | 1,4,6,7,35, 2,3,5,8,33,<br>36,38,40 34,37,39 | 2 P02793;Q7TP54,Q99376                                                                 |
| 5298 | 1,4,6,7,35, 2,3,5,8,33,<br>36,39,40 34,37,38 | 0                                                                                      |
| 5299 | 1,4,6,7,35, 2,3,5,8,33,<br>37,38,39 34,36,40 | 0                                                                                      |
| 5300 | 1,4,6,7,35, 2,3,5,8,33,<br>37,38,40 34,36,39 | 4 P00714,P36376,Q99041,Q99MH3                                                          |
| 5301 | 1,4,6,7,35, 2,3,5,8,33,<br>37,39,40 34,36,38 | 2 P02625,Q99041                                                                        |
| 5302 | 1,4,6,7,35, 2,3,5,8,33,<br>38,39,40 34,36,37 | 5 P10758,P51740,P55091,P98089,Q6AYR8                                                   |
| 5303 | 1,4,6,7,36, 2,3,5,8,33,<br>37,38,39 34,35,40 | 3 P11598,Q63474,Q63617                                                                 |
| 5304 | 1,4,6,7,36, 2,3,5,8,33,<br>37,38,40 34,35,39 | 9 P11598,P19629,P25809,P36376,Q5GRG2,Q63474,Q63617,Q99041,Q99MH3                       |
| 5305 | 1,4,6,7,36, 2,3,5,8,33,<br>37,39,40 34,35,38 | 7 O35547,P11598,P19629,P22283,P25809,Q5GRG2,Q63617                                     |
| 5306 | 1,4,6,7,36, 2,3,5,8,33,<br>38,39,40 34,35,37 | 3 P25809,P36860,P51740                                                                 |
| 5307 | 1,4,6,7,37, 2,3,5,8,33,<br>38,39,40 34,35,36 | 6 P01835,P51740,Q5GRG2,Q5I0D7,Q5QE79,Q99MH3                                            |
| 5308 | 1,4,6,8,33, 2,3,5,7,37,<br>34,35,36 38,39,40 | 9 D3ZUC6,G3V686,O54728,O89117,P08494,P08649,P08721,P18418,Q6AY61                       |



|      |                                              |    |                                                                                                                     |
|------|----------------------------------------------|----|---------------------------------------------------------------------------------------------------------------------|
| 5309 | 1,4,6,8,33, 2,3,5,7,36,<br>34,35,37 38,39,40 | 5  | O89117,P0C0A9,P13432,P22282,P80020                                                                                  |
| 5310 | 1,4,6,8,33, 2,3,5,7,36,<br>34,35,38 37,39,40 | 1  | Q30KJ2                                                                                                              |
| 5311 | 1,4,6,8,33, 2,3,5,7,36,<br>34,35,39 37,38,40 | 0  |                                                                                                                     |
| 5312 | 1,4,6,8,33, 2,3,5,7,36,<br>34,35,40 37,38,39 | 4  | P13432,P15399,P97580,Q30KJ2                                                                                         |
| 5313 | 1,4,6,8,33, 2,3,5,7,35,<br>34,36,37 38,39,40 | 16 | O54728,O55004,P00774,P08494,P08649,P08723,P0C0A9,P11883,P13432,P18418,P22282,P5509<br>1,P98089,Q62635,Q6AYR9,Q9JI85 |
| 5314 | 1,4,6,8,33, 2,3,5,7,35,<br>34,36,38 37,39,40 | 4  | O54728,P08494,P08649,P18418                                                                                         |
| 5315 | 1,4,6,8,33, 2,3,5,7,35,<br>34,36,39 37,38,40 | 6  | G3V686,O54728,P08494,P08649,P18418,P20767                                                                           |
| 5316 | 1,4,6,8,33, 2,3,5,7,35,<br>34,36,40 37,38,39 | 6  | O54728,P08494,P08649,P13432,P15399,P18418                                                                           |
| 5317 | 1,4,6,8,33, 2,3,5,7,35,<br>34,37,38 36,39,40 | 0  |                                                                                                                     |
| 5318 | 1,4,6,8,33, 2,3,5,7,35,<br>34,37,39 36,38,40 | 5  | P0C0A9,P13432,P21674,P22282,Q9QWN8                                                                                  |
| 5319 | 1,4,6,8,33, 2,3,5,7,35,<br>34,37,40 36,38,39 | 9  | P0C0A9,P13432,P15399,P21674,P22282,P24368,P30120,Q9QW07,Q9QWN8                                                      |
| 5320 | 1,4,6,8,33, 2,3,5,7,35,<br>34,38,39 36,37,40 | 2  | P19132,Q30KJ2                                                                                                       |
| 5321 | 1,4,6,8,33, 2,3,5,7,35,<br>34,38,40 36,37,39 | 4  | P15399,P25031,P97580,Q30KJ2                                                                                         |
| 5322 | 1,4,6,8,33, 2,3,5,7,35,<br>34,39,40 36,37,38 | 6  | P13432,P15399,P21674,P47967,P97580,Q30KJ2                                                                           |
| 5323 | 1,4,6,8,33, 2,3,5,7,34,<br>35,36,37 38,39,40 | 9  | O54728,P08723,P0C0A9,P12368,P20766,P60905,Q6AY61,Q6AYR9,Q9JI85                                                      |
| 5324 | 1,4,6,8,33, 2,3,5,7,34,<br>35,36,38 37,39,40 | 3  | O54728,Q6AY61,Q8VD89                                                                                                |
| 5325 | 1,4,6,8,33, 2,3,5,7,34,<br>35,36,39 37,38,40 | 4  | O54728,P20767,Q62714,Q6AY61                                                                                         |
| 5326 | 1,4,6,8,33, 2,3,5,7,34,<br>35,36,40 37,38,39 | 4  | O54728,P01681,Q6AY61,Q920G2                                                                                         |
| 5327 | 1,4,6,8,33, 2,3,5,7,34,<br>35,37,38 36,39,40 | 1  | P20766                                                                                                              |
| 5328 | 1,4,6,8,33, 2,3,5,7,34,<br>35,37,39 36,38,40 | 2  | Q5RLM2,Q9QWN8                                                                                                       |

|      |                                              |    |                                                                                                                        |
|------|----------------------------------------------|----|------------------------------------------------------------------------------------------------------------------------|
| 5329 | 1,4,6,8,33, 2,3,5,7,34,<br>35,37,40 36,38,39 | 5  | P13432,P20766,P60905,Q99041,Q9QW07                                                                                     |
| 5330 | 1,4,6,8,33, 2,3,5,7,34,<br>35,38,39 36,37,40 | 0  |                                                                                                                        |
| 5331 | 1,4,6,8,33, 2,3,5,7,34,<br>35,38,40 36,37,39 | 0  |                                                                                                                        |
| 5332 | 1,4,6,8,33, 2,3,5,7,34,<br>35,39,40 36,37,38 | 2  | P47967,P54921                                                                                                          |
| 5333 | 1,4,6,8,33, 2,3,5,7,34,<br>36,37,38 35,39,40 | 7  | O54728,P06911,P08723,P12020,P20766,Q63474,Q9JI85                                                                       |
| 5334 | 1,4,6,8,33, 2,3,5,7,34,<br>36,37,39 35,38,40 | 5  | O54728,P06911,P08723,P0C0A9,Q6AYR9                                                                                     |
| 5335 | 1,4,6,8,33, 2,3,5,7,34,<br>36,37,40 35,38,39 | 17 | O08815,O35547,O54728,P02782,P06911,P08723,P0C0A9,P12020,P13432,P19629,P20766,P30120,P70549,Q5GRG2,Q6AYR9,Q9JI85,Q9QW07 |
| 5336 | 1,4,6,8,33, 2,3,5,7,34,<br>36,38,39 35,37,40 | 2  | O54728,P20767                                                                                                          |
| 5337 | 1,4,6,8,33, 2,3,5,7,34,<br>36,38,40 35,37,39 | 1  | O54728                                                                                                                 |
| 5338 | 1,4,6,8,33, 2,3,5,7,34,<br>36,39,40 35,37,38 | 4  | O54728,P01681,P54921,Q6AY61                                                                                            |
| 5339 | 1,4,6,8,33, 2,3,5,7,34,<br>37,38,39 35,36,40 | 1  | Q9QWN8                                                                                                                 |
| 5340 | 1,4,6,8,33, 2,3,5,7,34,<br>37,38,40 35,36,39 | 4  | P20766,P30120,Q5GRG2,Q9QW07                                                                                            |
| 5341 | 1,4,6,8,33, 2,3,5,7,34,<br>37,39,40 35,36,38 | 6  | P0C0A9,P13432,P21674,P47967,Q9QW07,Q9QWN8                                                                              |
| 5342 | 1,4,6,8,33, 2,3,5,7,34,<br>38,39,40 35,36,37 | 5  | P25031,P47967,P51740,P54921,P55091                                                                                     |
| 5343 | 1,4,6,8,34, 2,3,5,7,33,<br>35,36,37 38,39,40 | 8  | P01039,P02770,P13432,P22282,P55091,Q5RKI1,Q6AY61,Q9JI85                                                                |
| 5344 | 1,4,6,8,34, 2,3,5,7,33,<br>35,36,38 37,39,40 | 4  | Q30KJ2,Q5RKI1,Q6AY61,Q8VD89                                                                                            |
| 5345 | 1,4,6,8,34, 2,3,5,7,33,<br>35,36,39 37,38,40 | 3  | Q62714,Q6AY61,Q9Z1F2                                                                                                   |
| 5346 | 1,4,6,8,34, 2,3,5,7,33,<br>35,36,40 37,38,39 | 6  | P07174,P13432,P15399,Q30KJ2,Q5RKI1,Q6AY61                                                                              |
| 5347 | 1,4,6,8,34, 2,3,5,7,33,<br>35,37,38 36,39,40 | 3  | Q30KJ2,Q5RKI1,Q99041                                                                                                   |
| 5348 | 1,4,6,8,34, 2,3,5,7,33,<br>35,37,39 36,38,40 | 2  | P01039,P22282                                                                                                          |

|      |                                              |    |                                                                                                                                   |
|------|----------------------------------------------|----|-----------------------------------------------------------------------------------------------------------------------------------|
| 5349 | 1,4,6,8,34, 2,3,5,7,33,<br>35,37,40 36,38,39 | 6  | P13432,P15399,Q30KJ2,Q5RKI1,Q99041,Q9QW07                                                                                         |
| 5350 | 1,4,6,8,34, 2,3,5,7,33,<br>35,38,39 36,37,40 | 3  | P15399,P97580,Q30KJ2                                                                                                              |
| 5351 | 1,4,6,8,34, 2,3,5,7,33,<br>35,38,40 36,37,39 | 4  | P15399,P97580,Q30KJ2,Q5RKI1                                                                                                       |
| 5352 | 1,4,6,8,34, 2,3,5,7,33,<br>35,39,40 36,37,38 | 6  | P13432,P15399,P47967,P54921,P97580,Q30KJ2                                                                                         |
| 5353 | 1,4,6,8,34, 2,3,5,7,33,<br>36,37,38 35,39,40 | 5  | P06911,P12020,Q5RKI1,Q63474,Q9JI85                                                                                                |
| 5354 | 1,4,6,8,34, 2,3,5,7,33,<br>36,37,39 35,38,40 | 6  | P01039,P0C0A9,P13432,P22282,Q6AYR9,Q9JI85                                                                                         |
| 5355 | 1,4,6,8,34, 2,3,5,7,33,<br>36,37,40 35,38,39 | 16 | P02782,P06911,P07174,P0C0A9,P12020,P13432,P15399,P19629,P22282,P30120,P49134,Q5GR<br>G2,Q5RKI1,Q6AYR9,Q9JI85,Q9QW07               |
| 5356 | 1,4,6,8,34, 2,3,5,7,33,<br>36,38,39 35,37,40 | 0  |                                                                                                                                   |
| 5357 | 1,4,6,8,34, 2,3,5,7,33,<br>36,38,40 35,37,39 | 5  | P12020,P15399,P97580,Q30KJ2,Q5RKI1                                                                                                |
| 5358 | 1,4,6,8,34, 2,3,5,7,33,<br>36,39,40 35,37,38 | 5  | P13432,P15399,P54921,P97580,Q30KJ2                                                                                                |
| 5359 | 1,4,6,8,34, 2,3,5,7,33,<br>37,38,39 35,36,40 | 1  | P49134                                                                                                                            |
| 5360 | 1,4,6,8,34, 2,3,5,7,33,<br>37,38,40 35,36,39 | 10 | P12020,P13432,P15399,P49134,P97580,Q30KJ2,Q5GRG2,Q5RKI1,Q99041,Q9QW07                                                             |
| 5361 | 1,4,6,8,34, 2,3,5,7,33,<br>37,39,40 35,36,38 | 8  | P13432,P15399,P21674,P22282,P49134,P97580,Q30KJ2,Q9QW07                                                                           |
| 5362 | 1,4,6,8,34, 2,3,5,7,33,<br>38,39,40 35,36,37 | 7  | P15399,P47967,P51740,P54921,P97580,P97840,Q30KJ2                                                                                  |
| 5363 | 1,4,6,8,35, 2,3,5,7,33,<br>36,37,38 34,39,40 | 6  | P19218,P20766,Q5RKI1,Q6AY61,Q8VD89,Q9JI85                                                                                         |
| 5364 | 1,4,6,8,35, 2,3,5,7,33,<br>36,37,39 34,38,40 | 6  | P01039,P50116,P97829,Q6AY61,Q6AYR9,Q9WUW8                                                                                         |
| 5365 | 1,4,6,8,35, 2,3,5,7,33,<br>36,37,40 34,38,39 | 17 | O35547,P02793;Q7TP54,P06911,P07174,P07861,P12368,P13432,P19132,P20766,P60905,P7054<br>9,Q5RKI1,Q6AY61,Q6AYR9,Q99041,Q9JI85,Q9QW07 |
| 5366 | 1,4,6,8,35, 2,3,5,7,33,<br>36,38,39 34,37,40 | 4  | P54921,Q62714,Q6AY61,Q9WUW8                                                                                                       |
| 5367 | 1,4,6,8,35, 2,3,5,7,33,<br>36,38,40 34,37,39 | 4  | P02793;Q7TP54,P54921,Q5RKI1,Q6AY61                                                                                                |
| 5368 | 1,4,6,8,35, 2,3,5,7,33,<br>36,39,40 34,37,38 | 2  | P54921,Q6AY61                                                                                                                     |

|      |                                              |                                                                                            |
|------|----------------------------------------------|--------------------------------------------------------------------------------------------|
| 5369 | 1,4,6,8,35, 2,3,5,7,33,<br>37,38,39 34,36,40 | 1 Q9WUW8                                                                                   |
| 5370 | 1,4,6,8,35, 2,3,5,7,33,<br>37,38,40 34,36,39 | 6 P20766,Q5GRG2,Q5RKI1,Q99041,Q99MH3,Q9QW07                                                |
| 5371 | 1,4,6,8,35, 2,3,5,7,33,<br>37,39,40 34,36,38 | 2 Q99041,Q9QW07                                                                            |
| 5372 | 1,4,6,8,35, 2,3,5,7,33,<br>38,39,40 34,36,37 | 6 P47967,P51740,P54921,P55091,P98089,Q62635                                                |
| 5373 | 1,4,6,8,36, 2,3,5,7,33,<br>37,38,39 34,35,40 | 5 P06911,P12020,Q5GRG2,Q63474,Q6AYR9                                                       |
| 5374 | 1,4,6,8,36, 2,3,5,7,33,<br>37,38,40 34,35,39 | 9 P06911,P12020,P19629,P20766,Q5GRG2,Q5RKI1,Q63474,Q6AYR9,Q9QW07                           |
| 5375 | 1,4,6,8,36, 2,3,5,7,33,<br>37,39,40 34,35,38 | 12 O35547,P02782,P06911,P12020,P13432,P19629,P70549,P97829,Q5GRG2,Q6AYR9,Q812E4,Q9<br>QW07 |
| 5376 | 1,4,6,8,36, 2,3,5,7,33,<br>38,39,40 34,35,37 | 5 P06911,P12020,P47967,P51740,P54921                                                       |
| 5377 | 1,4,6,8,37, 2,3,5,7,33,<br>38,39,40 34,35,36 | 7 P06911,P12020,P19629,P47967,P51740,Q5GRG2,Q5I0D7                                         |
| 5378 | 1,4,6,33,3 2,3,5,7,8,3<br>4,35,36,37 8,39,40 | 11 D3ZUC6,P08494,P08721,P08723,P11883,P35280,P36374,P36376,P80020,Q5QE79,Q6PCU2            |
| 5379 | 1,4,6,33,3 2,3,5,7,8,3<br>4,35,36,38 7,39,40 | 5 D3ZUC6,P08494,P08721,P36376,Q8VD89                                                       |
| 5380 | 1,4,6,33,3 2,3,5,7,8,3<br>4,35,36,39 7,38,40 | 5 D3ZUC6,P08494,P22006,P35280,Q6AY61                                                       |
| 5381 | 1,4,6,33,3 2,3,5,7,8,3<br>4,35,36,40 7,38,39 | 7 D3ZUC6,P08494,P11883,P35280,P36376,Q920G2,Q9EQS0                                         |
| 5382 | 1,4,6,33,3 2,3,5,7,8,3<br>4,35,37,38 6,39,40 | 3 B0BNN3,P36376,P80020                                                                     |
| 5383 | 1,4,6,33,3 2,3,5,7,8,3<br>4,35,37,39 6,38,40 | 1 P35280                                                                                   |
| 5384 | 1,4,6,33,3 2,3,5,7,8,3<br>4,35,37,40 6,38,39 | 5 P35280,P36376,P80020,Q9EQS0,Q9QW07                                                       |
| 5385 | 1,4,6,33,3 2,3,5,7,8,3<br>4,35,38,39 6,37,40 | 1 Q6AYR8                                                                                   |
| 5386 | 1,4,6,33,3 2,3,5,7,8,3<br>4,35,38,40 6,37,39 | 2 Q06000,Q9QYP1                                                                            |
| 5387 | 1,4,6,33,3 2,3,5,7,8,3<br>4,35,39,40 6,37,38 | 3 P35280,P47967,Q9EQS0                                                                     |
| 5388 | 1,4,6,33,3 2,3,5,7,8,3<br>4,36,37,38 5,39,40 | 4 P00774,P36374,P36376,Q63474                                                              |

|      |                                              |    |                                                                                     |
|------|----------------------------------------------|----|-------------------------------------------------------------------------------------|
| 5389 | 1,4,6,33,3 2,3,5,7,8,3<br>4,36,37,39 5,38,40 | 4  | P00774,P08494,P35280,P36374                                                         |
| 5390 | 1,4,6,33,3 2,3,5,7,8,3<br>4,36,37,40 5,38,39 | 9  | P07647,P08494,P08723,P11883,P24368,P35280,P36374,P36376,Q9QW07                      |
| 5391 | 1,4,6,33,3 2,3,5,7,8,3<br>4,36,38,39 5,37,40 | 3  | P08494,P36860,Q6AYR8                                                                |
| 5392 | 1,4,6,33,3 2,3,5,7,8,3<br>4,36,38,40 5,37,39 | 3  | P08494,P36376,P36860                                                                |
| 5393 | 1,4,6,33,3 2,3,5,7,8,3<br>4,36,39,40 5,37,38 | 5  | P08494,P19218,P22006,P35280,P36860                                                  |
| 5394 | 1,4,6,33,3 2,3,5,7,8,3<br>4,37,38,39 5,36,40 | 0  |                                                                                     |
| 5395 | 1,4,6,33,3 2,3,5,7,8,3<br>4,37,38,40 5,36,39 | 1  | P36376                                                                              |
| 5396 | 1,4,6,33,3 2,3,5,7,8,3<br>4,37,39,40 5,36,38 | 3  | P19218,P21674,P35280                                                                |
| 5397 | 1,4,6,33,3 2,3,5,7,8,3<br>4,38,39,40 5,36,37 | 7  | P15399,P47967,P51740,P55091,Q5I0D1,Q6AYR8,Q9QYP1                                    |
| 5398 | 1,4,6,33,3 2,3,5,7,8,3<br>5,36,37,38 4,39,40 | 4  | P20766,P36376,Q4FZU6,Q8VD89                                                         |
| 5399 | 1,4,6,33,3 2,3,5,7,8,3<br>5,36,37,39 4,38,40 | 4  | P20766,P35280,P36374,P70549                                                         |
| 5400 | 1,4,6,33,3 2,3,5,7,8,3<br>5,36,37,40 4,38,39 | 12 | O08815,O35547,P07174,P11883,P12368,P20766,P35280,P36376,P60905,P70549,Q9EQS0,Q9Z0V6 |
| 5401 | 1,4,6,33,3 2,3,5,7,8,3<br>5,36,38,39 4,37,40 | 3  | P62804,Q6AY61,Q6AYR8                                                                |
| 5402 | 1,4,6,33,3 2,3,5,7,8,3<br>5,36,38,40 4,37,39 | 4  | P06760,P20766,Q6AY61,Q9Z0V6                                                         |
| 5403 | 1,4,6,33,3 2,3,5,7,8,3<br>5,36,39,40 4,37,38 | 6  | B1H234,P06760,P35280,P62804,Q6AY61,Q9EQS0                                           |
| 5404 | 1,4,6,33,3 2,3,5,7,8,3<br>5,37,38,39 4,36,40 | 1  | P20766                                                                              |
| 5405 | 1,4,6,33,3 2,3,5,7,8,3<br>5,37,38,40 4,36,39 | 3  | P20766,P36376,Q9Z1F2                                                                |
| 5406 | 1,4,6,33,3 2,3,5,7,8,3<br>5,37,39,40 4,36,38 | 3  | B1H234,P20766,P35280                                                                |
| 5407 | 1,4,6,33,3 2,3,5,7,8,3<br>5,38,39,40 4,36,37 | 7  | P06760,P47967,P51740,P55091,P62804,Q6AYR8,Q9JJ50                                    |
| 5408 | 1,4,6,33,3 2,3,5,7,8,3<br>6,37,38,39 4,35,40 | 4  | P20766,P36374,P36860,Q63474                                                         |

|      |                                              |                                                                          |
|------|----------------------------------------------|--------------------------------------------------------------------------|
| 5409 | 1,4,6,33,3 2,3,5,7,8,3<br>6,37,38,40 4,35,39 | 10 O08815,P19629,P20766,P25809,P36374,P36376,P36860,Q5GRG2,Q63474,Q9Z0V6 |
| 5410 | 1,4,6,33,3 2,3,5,7,8,3<br>6,37,39,40 4,35,38 | 8 O35547,P19629,P20766,P25809,P35280,P36374,P36860,P70549                |
| 5411 | 1,4,6,33,3 2,3,5,7,8,3<br>6,38,39,40 4,35,37 | 6 P06760,P25809,P36860,P47967,P51740,Q6AYR8                              |
| 5412 | 1,4,6,33,3 2,3,5,7,8,3<br>7,38,39,40 4,35,36 | 4 P20766,P36860,P47967,P51740                                            |
| 5413 | 1,4,6,34,3 2,3,5,7,8,3<br>5,36,37,38 3,39,40 | 2 P36376,Q5RKI1                                                          |
| 5414 | 1,4,6,34,3 2,3,5,7,8,3<br>5,36,37,39 3,38,40 | 1 P35280                                                                 |
| 5415 | 1,4,6,34,3 2,3,5,7,8,3<br>5,36,37,40 3,38,39 | 9 P07174,P11883,P19132,P35280,P36376,P50115,P60905,Q5RKI1,Q9EQS0         |
| 5416 | 1,4,6,34,3 2,3,5,7,8,3<br>5,36,38,39 3,37,40 | 2 P50137,Q6AYR8                                                          |
| 5417 | 1,4,6,34,3 2,3,5,7,8,3<br>5,36,38,40 3,37,39 | 1 Q5RKI1                                                                 |
| 5418 | 1,4,6,34,3 2,3,5,7,8,3<br>5,36,39,40 3,37,38 | 4 P22006,P35280,P50137,Q9EQS0                                            |
| 5419 | 1,4,6,34,3 2,3,5,7,8,3<br>5,37,38,39 3,36,40 | 0                                                                        |
| 5420 | 1,4,6,34,3 2,3,5,7,8,3<br>5,37,38,40 3,36,39 | 4 P00714,P36376,Q4KLZ6,Q5RKI1                                            |
| 5421 | 1,4,6,34,3 2,3,5,7,8,3<br>5,37,39,40 3,36,38 | 3 B1H234,P35280,P50115                                                   |
| 5422 | 1,4,6,34,3 2,3,5,7,8,3<br>5,38,39,40 3,36,37 | 6 P10758,P15399,P47967,P51740,P55091,Q6AYR8                              |
| 5423 | 1,4,6,34,3 2,3,5,7,8,3<br>6,37,38,39 3,35,40 | 1 Q63474                                                                 |
| 5424 | 1,4,6,34,3 2,3,5,7,8,3<br>6,37,38,40 3,35,39 | 5 P19629,P36376,Q4KLZ6,Q5RKI1,Q63474                                     |
| 5425 | 1,4,6,34,3 2,3,5,7,8,3<br>6,37,39,40 3,35,38 | 2 P19629,P35280                                                          |
| 5426 | 1,4,6,34,3 2,3,5,7,8,3<br>6,38,39,40 3,35,37 | 3 P36860,P51740,Q6AYR8                                                   |
| 5427 | 1,4,6,34,3 2,3,5,7,8,3<br>7,38,39,40 3,35,36 | 3 P15399,P47967,P51740                                                   |
| 5428 | 1,4,6,35,3 2,3,5,7,8,3<br>6,37,38,39 3,34,40 | 2 P00731,P20766                                                          |

|      |                          |                         |    |                                                                                                                     |
|------|--------------------------|-------------------------|----|---------------------------------------------------------------------------------------------------------------------|
| 5429 | 1,4,6,35,3<br>6,37,38,40 | 2,3,5,7,8,3<br>3,34,39  | 9  | P02793;Q7TP54,P20766,P36376,P60905,P70549,Q5RKI1,Q99MH3,Q9QX74,Q9Z0V6                                               |
| 5430 | 1,4,6,35,3<br>6,37,39,40 | 2,3,5,7,8,3<br>3,34,38  | 9  | B1H234,O35547,P19629,P20766,P35280,P50116,P60905,P70549,Q9EQS0                                                      |
| 5431 | 1,4,6,35,3<br>6,38,39,40 | 2,3,5,7,8,3<br>3,34,37  | 6  | B1H234,P06760,P51740,P54921,Q6AY61,Q6AYR8                                                                           |
| 5432 | 1,4,6,35,3<br>7,38,39,40 | 2,3,5,7,8,3<br>3,34,36  | 9  | B1H234,P06760,P20766,P26772,P47967,P51740,Q5I0D7,Q99MH3,Q9QX74                                                      |
| 5433 | 1,4,6,36,3<br>7,38,39,40 | 2,3,5,7,8,3<br>3,34,35  | 9  | P19629,P20766,P25809,P36860,P51740,Q5GRG2,Q5I0D7,Q63474,Q9QX74                                                      |
| 5434 | 1,4,7,8,33,<br>34,35,36  | 2,3,5,6,37,<br>38,39,40 | 8  | G3V686,O54728,P08494,P08721,P51740,P82471,Q6AY61,Q9QX74                                                             |
| 5435 | 1,4,7,8,33,<br>34,35,37  | 2,3,5,6,36,<br>38,39,40 | 6  | B0BNN3,P08723,P0C0A9,P22282,P51740,Q9QX74                                                                           |
| 5436 | 1,4,7,8,33,<br>34,35,38  | 2,3,5,6,36,<br>37,39,40 | 2  | P82471,Q9QX74                                                                                                       |
| 5437 | 1,4,7,8,33,<br>34,35,39  | 2,3,5,6,36,<br>37,38,40 | 4  | P82471,Q9QX74,Q9Z0V6,Q9Z1F2                                                                                         |
| 5438 | 1,4,7,8,33,<br>34,35,40  | 2,3,5,6,36,<br>37,38,39 | 1  | Q9QX74                                                                                                              |
| 5439 | 1,4,7,8,33,<br>34,36,37  | 2,3,5,6,35,<br>38,39,40 | 16 | O54728,P00774,P08723,P0C0A9,P13432,P20646,P22282,P24368,P51740,P55091,P98089,Q6263<br>5,Q6AYR9,Q6P6R2,Q9JHB9,Q9QX74 |
| 5440 | 1,4,7,8,33,<br>34,36,38  | 2,3,5,6,35,<br>37,39,40 | 5  | G3V686,O54728,P20646,P82471,Q9QX74                                                                                  |
| 5441 | 1,4,7,8,33,<br>34,36,39  | 2,3,5,6,35,<br>37,38,40 | 9  | G3V686,O54728,P08494,P20646,P82471,Q5I0J9,Q9QX74,Q9Z0V6,Q9Z1F2                                                      |
| 5442 | 1,4,7,8,33,<br>34,36,40  | 2,3,5,6,35,<br>37,38,39 | 7  | O54728,P01681,P08494,P13432,P20646,Q9JHB9,Q9QX74                                                                    |
| 5443 | 1,4,7,8,33,<br>34,37,38  | 2,3,5,6,35,<br>36,39,40 | 4  | B0BNN3,P08723,P0C0A9,Q9JHB9                                                                                         |
| 5444 | 1,4,7,8,33,<br>34,37,39  | 2,3,5,6,35,<br>36,38,40 | 8  | P04916,P0C0A9,P20646,P21674,P22282,Q6AYQ8,Q9QX74,Q9Z0V6                                                             |
| 5445 | 1,4,7,8,33,<br>34,37,40  | 2,3,5,6,35,<br>36,38,39 | 10 | P02782,P08723,P0C0A9,P13432,P21674,P22282,P24368,P30120,Q9JHB9,Q9QW07                                               |
| 5446 | 1,4,7,8,33,<br>34,38,39  | 2,3,5,6,35,<br>36,37,40 | 5  | P19132,P20646,P82471,Q64093,Q9Z0V6                                                                                  |
| 5447 | 1,4,7,8,33,<br>34,38,40  | 2,3,5,6,35,<br>36,37,39 | 1  | Q9QYP1                                                                                                              |
| 5448 | 1,4,7,8,33,<br>34,39,40  | 2,3,5,6,35,<br>36,37,38 | 4  | P09656,P21674,Q6AYQ8,Q9Z0V6                                                                                         |

|      |                                              |    |                                                                                                          |
|------|----------------------------------------------|----|----------------------------------------------------------------------------------------------------------|
| 5449 | 1,4,7,8,33, 2,3,5,6,34,<br>35,36,37 38,39,40 | 8  | O54728,P08723,P0C0A9,P51740,P55091,Q63493,Q6AY61,Q6AYR9                                                  |
| 5450 | 1,4,7,8,33, 2,3,5,6,34,<br>35,36,38 37,39,40 | 2  | O54728,Q6AY61                                                                                            |
| 5451 | 1,4,7,8,33, 2,3,5,6,34,<br>35,36,39 37,38,40 | 5  | O54728,P20767,Q4KLZ6,Q62714,Q6AY61                                                                       |
| 5452 | 1,4,7,8,33, 2,3,5,6,34,<br>35,36,40 37,38,39 | 4  | O54728,P01681,Q6AY61,Q920G2                                                                              |
| 5453 | 1,4,7,8,33, 2,3,5,6,34,<br>35,37,38 36,39,40 | 2  | B0BNN3,P0C0A9                                                                                            |
| 5454 | 1,4,7,8,33, 2,3,5,6,34,<br>35,37,39 36,38,40 | 1  | P0C0A9                                                                                                   |
| 5455 | 1,4,7,8,33, 2,3,5,6,34,<br>35,37,40 36,38,39 | 5  | P02782,P0C0A9,P30120,P60905,Q9QW07                                                                       |
| 5456 | 1,4,7,8,33, 2,3,5,6,34,<br>35,38,39 36,37,40 | 1  | Q9JJ50                                                                                                   |
| 5457 | 1,4,7,8,33, 2,3,5,6,34,<br>35,38,40 36,37,39 | 0  |                                                                                                          |
| 5458 | 1,4,7,8,33, 2,3,5,6,34,<br>35,39,40 36,37,38 | 1  | Q4KLZ6                                                                                                   |
| 5459 | 1,4,7,8,33, 2,3,5,6,34,<br>36,37,38 35,39,40 | 5  | O54728,P08723,P0C0A9,Q63474,Q63493                                                                       |
| 5460 | 1,4,7,8,33, 2,3,5,6,34,<br>36,37,39 35,38,40 | 6  | O54728,P08723,P0C0A9,P22282,Q6AYR9,Q812E4                                                                |
| 5461 | 1,4,7,8,33, 2,3,5,6,34,<br>36,37,40 35,38,39 | 15 | O08815,O54728,P01681,P02782,P06911,P08723,P09456,P0C0A9,P13432,P30120,P47727,Q63493,Q6AYR9,Q812E4,Q9QW07 |
| 5462 | 1,4,7,8,33, 2,3,5,6,34,<br>36,38,39 35,37,40 | 1  | O54728                                                                                                   |
| 5463 | 1,4,7,8,33, 2,3,5,6,34,<br>36,38,40 35,37,39 | 2  | O54728,P01681                                                                                            |
| 5464 | 1,4,7,8,33, 2,3,5,6,34,<br>36,39,40 35,37,38 | 2  | O54728,P01681                                                                                            |
| 5465 | 1,4,7,8,33, 2,3,5,6,34,<br>37,38,39 35,36,40 | 4  | P04916,P0C0A9,P17475,P21674                                                                              |
| 5466 | 1,4,7,8,33, 2,3,5,6,34,<br>37,38,40 35,36,39 | 3  | P0C0A9,P30120,Q9QW07                                                                                     |
| 5467 | 1,4,7,8,33, 2,3,5,6,34,<br>37,39,40 35,36,38 | 9  | P02782,P04916,P0C0A9,P21674,P30120,Q6AYQ8,Q812E4,Q9QW07,Q9QWN8                                           |
| 5468 | 1,4,7,8,33, 2,3,5,6,34,<br>38,39,40 35,36,37 | 3  | P21674,P25236,Q5I0D7                                                                                     |



|      |                                              |                                                                                 |
|------|----------------------------------------------|---------------------------------------------------------------------------------|
| 5469 | 1,4,7,8,34, 2,3,5,6,33,<br>35,36,37 38,39,40 | 5 P01039,P0C0A9,P22282,P51740,P55091                                            |
| 5470 | 1,4,7,8,34, 2,3,5,6,33,<br>35,36,38 37,39,40 | 2 D3ZTX0,P01039                                                                 |
| 5471 | 1,4,7,8,34, 2,3,5,6,33,<br>35,36,39 37,38,40 | 6 P01039,Q62714,Q6AY61,Q9QX74,Q9Z0V6,Q9Z1F2                                     |
| 5472 | 1,4,7,8,34, 2,3,5,6,33,<br>35,36,40 37,38,39 | 1 Q6AY61                                                                        |
| 5473 | 1,4,7,8,34, 2,3,5,6,33,<br>35,37,38 36,39,40 | 3 B0BNN3,P01039,Q99MH3                                                          |
| 5474 | 1,4,7,8,34, 2,3,5,6,33,<br>35,37,39 36,38,40 | 5 P01039,P0C0A9,P22282,P63029,Q9Z0V6                                            |
| 5475 | 1,4,7,8,34, 2,3,5,6,33,<br>35,37,40 36,38,39 | 8 P0C0A9,P13432,P22282,P49134,Q923V8,Q99041,Q99MH3,Q9QW07                       |
| 5476 | 1,4,7,8,34, 2,3,5,6,33,<br>35,38,39 36,37,40 | 2 Q9WTT6,Q9Z0V6                                                                 |
| 5477 | 1,4,7,8,34, 2,3,5,6,33,<br>35,38,40 36,37,39 | 6 D3ZTX0,P10758,P15399,P97580,Q30KJ2,Q99MH3                                     |
| 5478 | 1,4,7,8,34, 2,3,5,6,33,<br>35,39,40 36,37,38 | 4 P09656,P10758,P15399,Q9Z0V6                                                   |
| 5479 | 1,4,7,8,34, 2,3,5,6,33,<br>36,37,38 35,39,40 | 5 P01039,P0C0A9,P22282,P49134,Q63474                                            |
| 5480 | 1,4,7,8,34, 2,3,5,6,33,<br>36,37,39 35,38,40 | 11 P01039,P0C0A9,P22282,P22283,P49134,P63029,Q6AYR9,Q6P6R2,Q812E4,Q9Z0V6,Q9Z1F2 |
| 5481 | 1,4,7,8,34, 2,3,5,6,33,<br>36,37,40 35,38,39 | 11 P02782,P0C0A9,P13432,P22282,P30120,P49134,Q6AYR9,Q811M5,Q812E4,Q9QW07,Q9Z2L0 |
| 5482 | 1,4,7,8,34, 2,3,5,6,33,<br>36,38,39 35,37,40 | 2 Q64093,Q9Z0V6                                                                 |
| 5483 | 1,4,7,8,34, 2,3,5,6,33,<br>36,38,40 35,37,39 | 1 D3ZTX0                                                                        |
| 5484 | 1,4,7,8,34, 2,3,5,6,33,<br>36,39,40 35,37,38 | 2 Q5I0J9,Q9Z0V6                                                                 |
| 5485 | 1,4,7,8,34, 2,3,5,6,33,<br>37,38,39 35,36,40 | 4 P22282,P49134,Q5RKI7,Q9Z0V6                                                   |
| 5486 | 1,4,7,8,34, 2,3,5,6,33,<br>37,38,40 35,36,39 | 4 P15399,P30120,P49134,Q99MH3                                                   |
| 5487 | 1,4,7,8,34, 2,3,5,6,33,<br>37,39,40 35,36,38 | 10 P02782,P0C0A9,P13432,P21674,P22282,P49134,Q812E4,Q923V8,Q9QW07,Q9Z0V6        |
| 5488 | 1,4,7,8,34, 2,3,5,6,33,<br>38,39,40 35,36,37 | 9 D3ZTX0,D4A5U3,P09656,P10758,P15399,P49134,P97580,Q30KJ2,Q9Z0V6                |

|      |                                              |                                                                                                   |
|------|----------------------------------------------|---------------------------------------------------------------------------------------------------|
| 5489 | 1,4,7,8,35, 2,3,5,6,33,<br>36,37,38 34,39,40 | 4 P01039,P19218,Q99MH3,Q9Z2L0                                                                     |
| 5490 | 1,4,7,8,35, 2,3,5,6,33,<br>36,37,39 34,38,40 | 7 P01039,P0C0A9,P63029,P97829,Q6AY61,Q6AYR9,Q812E4                                                |
| 5491 | 1,4,7,8,35, 2,3,5,6,33,<br>36,37,40 34,38,39 | 12 P02782,P02793;Q7TP54,P0C0A9,P19132,P60905,P97829,Q6AYR9,Q812E4,Q99041,Q99MH3,Q9<br>QW07,Q9Z2L0 |
| 5492 | 1,4,7,8,35, 2,3,5,6,33,<br>36,38,39 34,37,40 | 2 Q62714,Q6AY61                                                                                   |
| 5493 | 1,4,7,8,35, 2,3,5,6,33,<br>36,38,40 34,37,39 | 4 D3ZTX0,P02793;Q7TP54,Q6AY61,Q99MH3                                                              |
| 5494 | 1,4,7,8,35, 2,3,5,6,33,<br>36,39,40 34,37,38 | 1 Q6AY61                                                                                          |
| 5495 | 1,4,7,8,35, 2,3,5,6,33,<br>37,38,39 34,36,40 | 1 Q99MH3                                                                                          |
| 5496 | 1,4,7,8,35, 2,3,5,6,33,<br>37,38,40 34,36,39 | 3 Q99041,Q99MH3,Q9Z2L0                                                                            |
| 5497 | 1,4,7,8,35, 2,3,5,6,33,<br>37,39,40 34,36,38 | 3 Q99041,Q99MH3,Q9Z2L0                                                                            |
| 5498 | 1,4,7,8,35, 2,3,5,6,33,<br>38,39,40 34,36,37 | 6 D3ZTX0,P10758,P98089,Q5I0D7,Q62635,Q99MH3                                                       |
| 5499 | 1,4,7,8,36, 2,3,5,6,33,<br>37,38,39 34,35,40 | 6 P01039,P06911,Q63474,Q6AYR9,Q812E4,Q9Z2L0                                                       |
| 5500 | 1,4,7,8,36, 2,3,5,6,33,<br>37,38,40 34,35,39 | 9 P02782,P06911,P30120,Q5GRG2,Q63474,Q6AYR9,Q812E4,Q99MH3,Q9Z2L0                                  |
| 5501 | 1,4,7,8,36, 2,3,5,6,33,<br>37,39,40 34,35,38 | 10 O35547,P02782,P06911,P0C0A9,P19629,P30120,P97829,Q6AYR9,Q812E4,Q9Z2L0                          |
| 5502 | 1,4,7,8,36, 2,3,5,6,33,<br>38,39,40 34,35,37 | 2 P10758,Q5I0D7                                                                                   |
| 5503 | 1,4,7,8,37, 2,3,5,6,33,<br>38,39,40 34,35,36 | 9 D3ZUC6,O89117,P06911,P21674,P49134,Q5I0D7,Q812E4,Q99MH3,Q9Z2L0                                  |
| 5504 | 1,4,7,33,3 2,3,5,6,8,3<br>4,35,36,37 8,39,40 | 9 P08721,P08723,P25031,P36374,P36376,P51740,P55091,Q6PCU2,Q9R168                                  |
| 5505 | 1,4,7,33,3 2,3,5,6,8,3<br>4,35,36,38 7,39,40 | 6 D3ZUC6,P08721,P36376,P80299,P82471,Q9R168                                                       |
| 5506 | 1,4,7,33,3 2,3,5,6,8,3<br>4,35,36,39 7,38,40 | 3 P08494,P08721,P82471                                                                            |
| 5507 | 1,4,7,33,3 2,3,5,6,8,3<br>4,35,36,40 7,38,39 | 5 P08494,P08721,P36376,Q920G2,Q9R168                                                              |
| 5508 | 1,4,7,33,3 2,3,5,6,8,3<br>4,35,37,38 6,39,40 | 4 B0BNN3,P36376,P82471,Q9R168                                                                     |

|      |                                              |                                             |
|------|----------------------------------------------|---------------------------------------------|
| 5509 | 1,4,7,33,3 2,3,5,6,8,3<br>4,35,37,39 6,38,40 | 1 P25031                                    |
| 5510 | 1,4,7,33,3 2,3,5,6,8,3<br>4,35,37,40 6,38,39 | 4 B0BNN3,P24368,P36376,Q9R168               |
| 5511 | 1,4,7,33,3 2,3,5,6,8,3<br>4,35,38,39 6,37,40 | 3 P80299,P82471,Q9JJ50                      |
| 5512 | 1,4,7,33,3 2,3,5,6,8,3<br>4,35,38,40 6,37,39 | 5 P10758,P36376,P80299,Q9QYP1,Q9R168        |
| 5513 | 1,4,7,33,3 2,3,5,6,8,3<br>4,35,39,40 6,37,38 | 1 P10758                                    |
| 5514 | 1,4,7,33,3 2,3,5,6,8,3<br>4,36,37,38 5,39,40 | 6 P00774,P08723,P36374,P36376,P82471,Q9R168 |
| 5515 | 1,4,7,33,3 2,3,5,6,8,3<br>4,36,37,39 5,38,40 | 5 P08723,P0C0A9,P25031,P36374,P36376        |
| 5516 | 1,4,7,33,3 2,3,5,6,8,3<br>4,36,37,40 5,38,39 | 6 O08815,P08723,P0C0A9,P24368,P36374,P36376 |
| 5517 | 1,4,7,33,3 2,3,5,6,8,3<br>4,36,38,39 5,37,40 | 3 P80299,P82471,Q64093                      |
| 5518 | 1,4,7,33,3 2,3,5,6,8,3<br>4,36,38,40 5,37,39 | 4 P36376,P80299,Q9QYP1,Q9R168               |
| 5519 | 1,4,7,33,3 2,3,5,6,8,3<br>4,36,39,40 5,37,38 | 1 P19218                                    |
| 5520 | 1,4,7,33,3 2,3,5,6,8,3<br>4,37,38,39 5,36,40 | 6 B0BNN3,P17475,P82471,Q64093,Q6AYQ8,Q9EQV9 |
| 5521 | 1,4,7,33,3 2,3,5,6,8,3<br>4,37,38,40 5,36,39 | 3 B0BNN3,P36376,Q9R168                      |
| 5522 | 1,4,7,33,3 2,3,5,6,8,3<br>4,37,39,40 5,36,38 | 4 P19218,P21674,P24368,Q6AYQ8               |
| 5523 | 1,4,7,33,3 2,3,5,6,8,3<br>4,38,39,40 5,36,37 | 6 F1M3L7,P10758,P17475,P80299,Q64093,Q9QYP1 |
| 5524 | 1,4,7,33,3 2,3,5,6,8,3<br>5,36,37,38 4,39,40 | 3 P08723,P36376,Q9R168                      |
| 5525 | 1,4,7,33,3 2,3,5,6,8,3<br>5,36,37,39 4,38,40 | 2 P25031,P36374                             |
| 5526 | 1,4,7,33,3 2,3,5,6,8,3<br>5,36,37,40 4,38,39 | 5 O08815,P08723,P36374,P36376,P60905        |
| 5527 | 1,4,7,33,3 2,3,5,6,8,3<br>5,36,38,39 4,37,40 | 1 Q9JJ50                                    |
| 5528 | 1,4,7,33,3 2,3,5,6,8,3<br>5,36,38,40 4,37,39 | 1 P36376                                    |

|      |                                              |                                             |
|------|----------------------------------------------|---------------------------------------------|
| 5529 | 1,4,7,33,3 2,3,5,6,8,3<br>5,36,39,40 4,37,38 | 0                                           |
| 5530 | 1,4,7,33,3 2,3,5,6,8,3<br>5,37,38,39 4,36,40 | 2 B0BNN3,Q91XN4                             |
| 5531 | 1,4,7,33,3 2,3,5,6,8,3<br>5,37,38,40 4,36,39 | 5 B0BNN3,P08649,P36376,Q8K4G9,Q99MH3        |
| 5532 | 1,4,7,33,3 2,3,5,6,8,3<br>5,37,39,40 4,36,38 | 0                                           |
| 5533 | 1,4,7,33,3 2,3,5,6,8,3<br>5,38,39,40 4,36,37 | 5 P10758,P55091,Q6AYR8,Q9JJ50,Q9QYP1        |
| 5534 | 1,4,7,33,3 2,3,5,6,8,3<br>6,37,38,39 4,35,40 | 2 P36374,Q63474                             |
| 5535 | 1,4,7,33,3 2,3,5,6,8,3<br>6,37,38,40 4,35,39 | 6 O08815,P08723,P36374,P36376,P36860,Q63474 |
| 5536 | 1,4,7,33,3 2,3,5,6,8,3<br>6,37,39,40 4,35,38 | 3 O08815,P36374,Q812E4                      |
| 5537 | 1,4,7,33,3 2,3,5,6,8,3<br>6,38,39,40 4,35,37 | 1 P36860                                    |
| 5538 | 1,4,7,33,3 2,3,5,6,8,3<br>7,38,39,40 4,35,36 | 3 P17475,P21674,Q5I0D7                      |
| 5539 | 1,4,7,34,3 2,3,5,6,8,3<br>5,36,37,38 3,39,40 | 5 P01039,P25031,P36376,Q99MH3,Q9R168        |
| 5540 | 1,4,7,34,3 2,3,5,6,8,3<br>5,36,37,39 3,38,40 | 2 P01039,P25031                             |
| 5541 | 1,4,7,34,3 2,3,5,6,8,3<br>5,36,37,40 3,38,39 | 2 P19132,P36376                             |
| 5542 | 1,4,7,34,3 2,3,5,6,8,3<br>5,36,38,39 3,37,40 | 0                                           |
| 5543 | 1,4,7,34,3 2,3,5,6,8,3<br>5,36,38,40 3,37,39 | 4 D3ZTX0,P10758,P36376,Q99MH3               |
| 5544 | 1,4,7,34,3 2,3,5,6,8,3<br>5,36,39,40 3,37,38 | 1 P10758                                    |
| 5545 | 1,4,7,34,3 2,3,5,6,8,3<br>5,37,38,39 3,36,40 | 2 Q91XN4,Q99MH3                             |
| 5546 | 1,4,7,34,3 2,3,5,6,8,3<br>5,37,38,40 3,36,39 | 4 B0BNN3,P36376,Q99MH3,Q9R168               |
| 5547 | 1,4,7,34,3 2,3,5,6,8,3<br>5,37,39,40 3,36,38 | 2 P10758,Q99MH3                             |
| 5548 | 1,4,7,34,3 2,3,5,6,8,3<br>5,38,39,40 3,36,37 | 3 D3ZTX0,P10758,Q99MH3                      |

|      |                          |                        |   |                                                                |
|------|--------------------------|------------------------|---|----------------------------------------------------------------|
| 5549 | 1,4,7,34,3<br>6,37,38,39 | 2,3,5,6,8,3<br>3,35,40 | 1 | Q63474                                                         |
| 5550 | 1,4,7,34,3<br>6,37,38,40 | 2,3,5,6,8,3<br>3,35,39 | 4 | P36376,Q4KLZ6,Q63474,Q99MH3                                    |
| 5551 | 1,4,7,34,3<br>6,37,39,40 | 2,3,5,6,8,3<br>3,35,38 | 1 | Q812E4                                                         |
| 5552 | 1,4,7,34,3<br>6,38,39,40 | 2,3,5,6,8,3<br>3,35,37 | 3 | D3ZTX0,P10758,Q64093                                           |
| 5553 | 1,4,7,34,3<br>7,38,39,40 | 2,3,5,6,8,3<br>3,35,36 | 5 | P10758,P17475,P49134,Q5RKI7,Q99MH3                             |
| 5554 | 1,4,7,35,3<br>6,37,38,39 | 2,3,5,6,8,3<br>3,34,40 | 4 | P25031,P80202,Q91XN4,Q99MH3                                    |
| 5555 | 1,4,7,35,3<br>6,37,38,40 | 2,3,5,6,8,3<br>3,34,39 | 4 | P02793;Q7TP54,P36376,Q99MH3,Q9Z2L0                             |
| 5556 | 1,4,7,35,3<br>6,37,39,40 | 2,3,5,6,8,3<br>3,34,38 | 5 | O35547,P02625,P60905,Q99MH3,Q9Z2L0                             |
| 5557 | 1,4,7,35,3<br>6,38,39,40 | 2,3,5,6,8,3<br>3,34,37 | 4 | D3ZTX0,P10758,Q6AYR8,Q99MH3                                    |
| 5558 | 1,4,7,35,3<br>7,38,39,40 | 2,3,5,6,8,3<br>3,34,36 | 9 | O89117,P08649,P10758,P26772,Q5I0D7,Q91XN4,Q99MH3,Q99PP0,Q9QZQ5 |
| 5559 | 1,4,7,36,3<br>7,38,39,40 | 2,3,5,6,8,3<br>3,34,35 | 6 | O89117,P19629,Q5I0D7,Q63474,Q99MH3,Q9Z2L0                      |
| 5560 | 1,4,8,33,3<br>4,35,36,37 | 2,3,5,6,7,3<br>8,39,40 | 9 | O54728,P08723,P13432,P36374,P50116,P51740,P55091,Q5QE79,Q6AY61 |
| 5561 | 1,4,8,33,3<br>4,35,36,38 | 2,3,5,6,7,3<br>7,39,40 | 4 | O54728,P00762,P01835,Q6AY61                                    |
| 5562 | 1,4,8,33,3<br>4,35,36,39 | 2,3,5,6,7,3<br>7,38,40 | 8 | O54728,P01835,P08494,P20767,P50116,Q62714,Q6AY61,Q9QX74        |
| 5563 | 1,4,8,33,3<br>4,35,36,40 | 2,3,5,6,7,3<br>7,38,39 | 6 | O54728,P01681,P01835,P08494,P13432,Q6AY61                      |
| 5564 | 1,4,8,33,3<br>4,35,37,38 | 2,3,5,6,7,3<br>6,39,40 | 1 | B0BNN3                                                         |
| 5565 | 1,4,8,33,3<br>4,35,37,39 | 2,3,5,6,7,3<br>6,38,40 | 2 | P50116,Q9QWN8                                                  |
| 5566 | 1,4,8,33,3<br>4,35,37,40 | 2,3,5,6,7,3<br>6,38,39 | 8 | B0BNN3,P13432,P24368,P30120,P50116,P60905,Q9QW07,Q9QWN8        |
| 5567 | 1,4,8,33,3<br>4,35,38,39 | 2,3,5,6,7,3<br>6,37,40 | 3 | P01835,P19132,Q9JJ50                                           |
| 5568 | 1,4,8,33,3<br>4,35,38,40 | 2,3,5,6,7,3<br>6,37,39 | 3 | P15399,P97580,Q30KJ2                                           |

|      |                                              |    |                                                                                                   |
|------|----------------------------------------------|----|---------------------------------------------------------------------------------------------------|
| 5569 | 1,4,8,33,3 2,3,5,6,7,3<br>4,35,39,40 6,37,38 | 3  | P01835,P15399,P47967                                                                              |
| 5570 | 1,4,8,33,3 2,3,5,6,7,3<br>4,36,37,38 5,39,40 | 5  | B0BNN3,O54728,P08723,P36374,Q63474                                                                |
| 5571 | 1,4,8,33,3 2,3,5,6,7,3<br>4,36,37,39 5,38,40 | 8  | O54728,P08723,P13432,P36374,P50116,Q6AYR9,Q6P6R2,Q9QWN8                                           |
| 5572 | 1,4,8,33,3 2,3,5,6,7,3<br>4,36,37,40 5,38,39 | 11 | O08815,O54728,P02782,P08723,P13432,P24368,P30120,P36374,P47727,Q6AYR9,Q9QW07                      |
| 5573 | 1,4,8,33,3 2,3,5,6,7,3<br>4,36,38,39 5,37,40 | 2  | O54728,P19132                                                                                     |
| 5574 | 1,4,8,33,3 2,3,5,6,7,3<br>4,36,38,40 5,37,39 | 3  | O54728,P01681,P15399                                                                              |
| 5575 | 1,4,8,33,3 2,3,5,6,7,3<br>4,36,39,40 5,37,38 | 6  | O54728,P01681,P08494,P13432,P15399,P19218                                                         |
| 5576 | 1,4,8,33,3 2,3,5,6,7,3<br>4,37,38,39 5,36,40 | 4  | B0BNN3,P02793,Q7TP54,P19132,Q9QWN8                                                                |
| 5577 | 1,4,8,33,3 2,3,5,6,7,3<br>4,37,38,40 5,36,39 | 5  | B0BNN3,P13432,P15399,P30120,Q9QWN8                                                                |
| 5578 | 1,4,8,33,3 2,3,5,6,7,3<br>4,37,39,40 5,36,38 | 8  | P02782,P13432,P15399,P19218,P21674,P24368,P30120,Q9QWN8                                           |
| 5579 | 1,4,8,33,3 2,3,5,6,7,3<br>4,38,39,40 5,36,37 | 6  | P15399,P19132,P47967,P97580,Q30KJ2,Q9JJS8                                                         |
| 5580 | 1,4,8,33,3 2,3,5,6,7,3<br>5,36,37,38 4,39,40 | 5  | B0BNN3,O54728,P08723,P20766,Q6AY61                                                                |
| 5581 | 1,4,8,33,3 2,3,5,6,7,3<br>5,36,37,39 4,38,40 | 8  | O54728,P08723,P20766,P36374,P50116,P60905,Q6AY61,Q6AYR9                                           |
| 5582 | 1,4,8,33,3 2,3,5,6,7,3<br>5,36,37,40 4,38,39 | 14 | O08815,O54728,P01681,P02782,P07861,P08723,P13432,P20766,P30120,P36374,P50116,P60905,Q6AY61,Q6AYR9 |
| 5583 | 1,4,8,33,3 2,3,5,6,7,3<br>5,36,38,39 4,37,40 | 6  | O54728,P01835,P20767,Q62714,Q6AY61,Q9JJ50                                                         |
| 5584 | 1,4,8,33,3 2,3,5,6,7,3<br>5,36,38,40 4,37,39 | 5  | O54728,P01681,P01835,P20766,Q6AY61                                                                |
| 5585 | 1,4,8,33,3 2,3,5,6,7,3<br>5,36,39,40 4,37,38 | 6  | O54728,P01681,P01835,P20767,P50116,Q6AY61                                                         |
| 5586 | 1,4,8,33,3 2,3,5,6,7,3<br>5,37,38,39 4,36,40 | 4  | B0BNN3,P20766,Q9JJ50,Q9QWN8                                                                       |
| 5587 | 1,4,8,33,3 2,3,5,6,7,3<br>5,37,38,40 4,36,39 | 4  | B0BNN3,P20766,P60905,Q8K4G9                                                                       |
| 5588 | 1,4,8,33,3 2,3,5,6,7,3<br>5,37,39,40 4,36,38 | 4  | P20766,P50116,P60905,Q9QWN8                                                                       |

|      |                                              |                                                                                                      |
|------|----------------------------------------------|------------------------------------------------------------------------------------------------------|
| 5589 | 1,4,8,33,3 2,3,5,6,7,3<br>5,38,39,40 4,36,37 | 6 P47967,P55091,P98089,Q5I0D7,Q62635,Q9JJ50                                                          |
| 5590 | 1,4,8,33,3 2,3,5,6,7,3<br>6,37,38,39 4,35,40 | 5 O54728,P08723,P20766,P36374,Q63474                                                                 |
| 5591 | 1,4,8,33,3 2,3,5,6,7,3<br>6,37,38,40 4,35,39 | 9 O08815,O54728,P02782,P08723,P20766,P30120,P36374,Q63474,Q6AYR9                                     |
| 5592 | 1,4,8,33,3 2,3,5,6,7,3<br>6,37,39,40 4,35,38 | 14 O08815,O35547,O54728,P01681,P02782,P08723,P13432,P20766,P30120,P36374,P50116,Q6AYR9,Q812E4,Q9QWN8 |
| 5593 | 1,4,8,33,3 2,3,5,6,7,3<br>6,38,39,40 4,35,37 | 2 O54728,P01681                                                                                      |
| 5594 | 1,4,8,33,3 2,3,5,6,7,3<br>7,38,39,40 4,35,36 | 5 P20766,P21674,P47967,Q5I0D7,Q9QWN8                                                                 |
| 5595 | 1,4,8,34,3 2,3,5,6,7,3<br>5,36,37,38 3,39,40 | 3 P01039,Q5RKI1,Q6AY61                                                                               |
| 5596 | 1,4,8,34,3 2,3,5,6,7,3<br>5,36,37,39 3,38,40 | 5 P01039,P13432,P50116,Q62714,Q6AY61                                                                 |
| 5597 | 1,4,8,34,3 2,3,5,6,7,3<br>5,36,37,40 3,38,39 | 8 P07174,P13432,P50115,P50116,P60905,Q5RKI1,Q6AY61,Q6AYR9                                            |
| 5598 | 1,4,8,34,3 2,3,5,6,7,3<br>5,36,38,39 3,37,40 | 3 D3ZTX0,Q62714,Q6AY61                                                                               |
| 5599 | 1,4,8,34,3 2,3,5,6,7,3<br>5,36,38,40 3,37,39 | 5 D3ZTX0,P15399,P97580,Q5RKI1,Q6AY61                                                                 |
| 5600 | 1,4,8,34,3 2,3,5,6,7,3<br>5,36,39,40 3,37,38 | 5 D3ZTX0,P13432,P15399,P50116,Q6AY61                                                                 |
| 5601 | 1,4,8,34,3 2,3,5,6,7,3<br>5,37,38,39 3,36,40 | 1 Q91XN4                                                                                             |
| 5602 | 1,4,8,34,3 2,3,5,6,7,3<br>5,37,38,40 3,36,39 | 6 B0BNN3,D3ZTX0,P15399,P97580,Q5RKI1,Q99MH3                                                          |
| 5603 | 1,4,8,34,3 2,3,5,6,7,3<br>5,37,39,40 3,36,38 | 5 P13432,P15399,P50115,P50116,Q923V8                                                                 |
| 5604 | 1,4,8,34,3 2,3,5,6,7,3<br>5,38,39,40 3,36,37 | 8 D3ZTX0,P10758,P15399,P47967,P97580,P98089,Q30KJ2,Q62635                                            |
| 5605 | 1,4,8,34,3 2,3,5,6,7,3<br>6,37,38,39 3,35,40 | 2 P01039,Q63474                                                                                      |
| 5606 | 1,4,8,34,3 2,3,5,6,7,3<br>6,37,38,40 3,35,39 | 8 D3ZTX0,P13432,P15399,P30120,P49134,Q4KLZ6,Q5RKI1,Q63474                                            |
| 5607 | 1,4,8,34,3 2,3,5,6,7,3<br>6,37,39,40 3,35,38 | 8 P02782,P13432,P15399,P19629,P49134,P50116,Q6AYR9,Q812E4                                            |
| 5608 | 1,4,8,34,3 2,3,5,6,7,3<br>6,38,39,40 3,35,37 | 3 D3ZTX0,P15399,P97580                                                                               |

|      |                               |                        |    |                                                                                     |
|------|-------------------------------|------------------------|----|-------------------------------------------------------------------------------------|
| 5609 | 1,4,8,34,3<br>7,38,39,40      | 2,3,5,6,7,3<br>3,35,36 | 5  | P15399,P47967,P49134,P97580,Q5I0D7                                                  |
| 5610 | 1,4,8,35,3<br>6,37,38,39      | 2,3,5,6,7,3<br>3,34,40 | 4  | P01039,P20766,Q6AY61,Q91XN4                                                         |
| 5611 | 1,4,8,35,3<br>6,37,38,40      | 2,3,5,6,7,3<br>3,34,39 | 8  | D3ZTX0,P20766,P60905,Q5RKI1,Q63474,Q6AY61,Q99MH3,Q9Z2L0                             |
| 5612 | 1,4,8,35,3<br>6,37,39,40      | 2,3,5,6,7,3<br>3,34,38 | 12 | O35547,P02782,P07861,P20766,P50116,P60905,P80299,P97829,Q6AY61,Q6AYR9,Q812E4,Q9Z2L0 |
| 5613 | 1,4,8,35,3<br>6,38,39,40      | 2,3,5,6,7,3<br>3,34,37 | 7  | D3ZTX0,P54921,P98089,Q5I0D7,Q62635,Q6AY61,Q9JJ50                                    |
| 5614 | 1,4,8,35,3<br>7,38,39,40      | 2,3,5,6,7,3<br>3,34,36 | 10 | P08721,P20766,P26772,P47967,P98089,Q5I0D7,Q62635,Q91XN4,Q99MH3,Q99PP0               |
| 5615 | 1,4,8,36,3<br>7,38,39,40      | 2,3,5,6,7,3<br>3,34,35 | 9  | P06911,P19629,P20766,Q5GRG2,Q5I0D7,Q63474,Q6AYR9,Q812E4,Q9Z2L0                      |
| 5616 | 1,4,33,34,<br>35,36,37,3<br>8 | 2,3,5,6,7,8<br>,39,40  | 6  | B0BNN3,D3ZUC6,P20766,P36374,P36376,Q9R168                                           |
| 5617 | 1,4,33,34,<br>35,36,37,3<br>9 | 2,3,5,6,7,8<br>,38,40  | 5  | P25031,P35280,P36374,P50115,P50116                                                  |
| 5618 | 1,4,33,34,<br>35,36,37,4<br>0 | 2,3,5,6,7,8<br>,38,39  | 9  | P07174,P20766,P35280,P36374,P36376,P50115,P50116,P60905,Q9EQS0                      |
| 5619 | 1,4,33,34,<br>35,36,38,3<br>9 | 2,3,5,6,7,8<br>,37,40  | 4  | D3ZUC6,P82471,Q6AYR8,Q9JJ50                                                         |
| 5620 | 1,4,33,34,<br>35,36,38,4<br>0 | 2,3,5,6,7,8<br>,37,39  | 2  | D3ZUC6,P36376                                                                       |
| 5621 | 1,4,33,34,<br>35,36,39,4<br>0 | 2,3,5,6,7,8<br>,37,38  | 5  | P19218,P22006,P35280,P50115,Q9EQS0                                                  |
| 5622 | 1,4,33,34,<br>35,37,38,3<br>9 | 2,3,5,6,7,8<br>,36,40  | 4  | B0BNN3,P36374,Q91XN4,Q9EQV9                                                         |
| 5623 | 1,4,33,34,<br>35,37,38,4<br>0 | 2,3,5,6,7,8<br>,36,39  | 5  | B0BNN3,P20766,P36374,P36376,Q8K4G9                                                  |
| 5624 | 1,4,33,34,<br>35,37,39,4<br>0 | 2,3,5,6,7,8<br>,36,38  | 7  | B0BNN3,P19218,P35280,P36374,P50115,P50116,Q91XN4                                    |



|      |                               |                       |    |                                                                       |
|------|-------------------------------|-----------------------|----|-----------------------------------------------------------------------|
| 5625 | 1,4,33,34,<br>35,38,39,4<br>0 | 2,3,5,6,7,8<br>,36,37 | 6  | P10758,P47967,P55091,Q6AYR8,Q9JJ50,Q9QYP1                             |
| 5626 | 1,4,33,34,<br>36,37,38,3<br>9 | 2,3,5,6,7,8<br>,35,40 | 2  | P36374,Q63474                                                         |
| 5627 | 1,4,33,34,<br>36,37,38,4<br>0 | 2,3,5,6,7,8<br>,35,39 | 7  | B0BNN3,P20766,P36374,P36376,P36860,Q4KLZ6,Q63474                      |
| 5628 | 1,4,33,34,<br>36,37,39,4<br>0 | 2,3,5,6,7,8<br>,35,38 | 5  | P19218,P24368,P35280,P36374,P50115                                    |
| 5629 | 1,4,33,34,<br>36,38,39,4<br>0 | 2,3,5,6,7,8<br>,35,37 | 4  | P19132,P19218,P36860,Q6AYR8                                           |
| 5630 | 1,4,33,34,<br>37,38,39,4<br>0 | 2,3,5,6,7,8<br>,35,36 | 4  | B0BNN3,P19218,P36374,P47967                                           |
| 5631 | 1,4,33,35,<br>36,37,38,3<br>9 | 2,3,5,6,7,8<br>,34,40 | 4  | P20766,P36374,P80202,Q91XN4                                           |
| 5632 | 1,4,33,35,<br>36,37,38,4<br>0 | 2,3,5,6,7,8<br>,34,39 | 8  | B0BNN3,P20762,P20766,P36374,P36376,P60905,Q8K4G9,Q9Z0V6               |
| 5633 | 1,4,33,35,<br>36,37,39,4<br>0 | 2,3,5,6,7,8<br>,34,38 | 8  | P20766,P35280,P36374,P50115,P50116,P60905,P70549,Q91XN4               |
| 5634 | 1,4,33,35,<br>36,38,39,4<br>0 | 2,3,5,6,7,8<br>,34,37 | 5  | P06760,P20766,Q6AY61,Q6AYR8,Q9JJ50                                    |
| 5635 | 1,4,33,35,<br>37,38,39,4<br>0 | 2,3,5,6,7,8<br>,34,36 | 10 | B0BNN3,P20766,P36374,P47967,P48199,Q5I0D7,Q8K4G9,Q91XN4,Q99PP0,Q9JJ50 |
| 5636 | 1,4,33,36,<br>37,38,39,4<br>0 | 2,3,5,6,7,8<br>,34,35 | 7  | P19629,P20766,P36374,P36860,P48199,Q5I0D7,Q63474                      |
| 5637 | 1,4,34,35,<br>36,37,38,3<br>9 | 2,3,5,6,7,8<br>,33,40 | 5  | O54858,P25031,P80202,Q91XN4,Q99PP0                                    |

|      |                               |                          |    |                                                                                     |
|------|-------------------------------|--------------------------|----|-------------------------------------------------------------------------------------|
| 5638 | 1,4,34,35,<br>36,37,38,4<br>0 | 2,3,5,6,7,8<br>,33,39    | 12 | D3ZTX0,O54858,P00758,P20766,P36376,P50115,P80202,Q4KLZ6,Q5RKI1,Q91XN4,Q99MH3,Q99PP0 |
| 5639 | 1,4,34,35,<br>36,37,39,4<br>0 | 2,3,5,6,7,8<br>,33,38    | 8  | O54858,P35280,P36374,P50115,P50116,P60905,P80202,Q91XN4                             |
| 5640 | 1,4,34,35,<br>36,38,39,4<br>0 | 2,3,5,6,7,8<br>,33,37    | 5  | D3ZTX0,P10758,P50137,Q6AYR8,Q91XN4                                                  |
| 5641 | 1,4,34,35,<br>37,38,39,4<br>0 | 2,3,5,6,7,8<br>,33,36    | 10 | D3ZTX0,O54858,P16636,P50115,P80202,Q09030,Q91XN4,Q99MH3,Q99PP0,Q9QZQ5               |
| 5642 | 1,4,34,36,<br>37,38,39,4<br>0 | 2,3,5,6,7,8<br>,33,35    | 7  | O54858,P19629,P36374,P80202,Q4KLZ6,Q63474,Q91XN4                                    |
| 5643 | 1,4,35,36,<br>37,38,39,4<br>0 | 2,3,5,6,7,8<br>,33,34    | 11 | D3ZTX0,O54858,P20766,P60905,P80202,Q5I0D7,Q91XN4,Q99MH3,Q99PP0,Q9QW30,Q9QZQ5        |
| 5644 | 1,5,6,7,8,3<br>3,34,35        | 2,3,4,36,3<br>7,38,39,40 | 3  | O89117,P08721,Q9QX74                                                                |
| 5645 | 1,5,6,7,8,3<br>3,34,36        | 2,3,4,35,3<br>7,38,39,40 | 10 | P00774,P06760,P08494,P08721,P19223,P55091,P98089,Q62635,Q63751,Q9QX74               |
| 5646 | 1,5,6,7,8,3<br>3,34,37        | 2,3,4,35,3<br>6,38,39,40 | 8  | P00774,P06760,P13432,P55091,P98089,Q62635,Q9QW07,Q9QX74                             |
| 5647 | 1,5,6,7,8,3<br>3,34,38        | 2,3,4,35,3<br>6,37,39,40 | 3  | P50115,P50116,Q6IG05                                                                |
| 5648 | 1,5,6,7,8,3<br>3,34,39        | 2,3,4,35,3<br>6,37,38,40 | 5  | P02651,P02793,Q7TP54,P21674,Q9QX74,Q9Z0V6                                           |
| 5649 | 1,5,6,7,8,3<br>3,34,40        | 2,3,4,35,3<br>6,37,38,39 | 2  | P13432,P25031                                                                       |
| 5650 | 1,5,6,7,8,3<br>3,35,36        | 2,3,4,34,3<br>7,38,39,40 | 2  | P08721,Q4KLZ6                                                                       |
| 5651 | 1,5,6,7,8,3<br>3,35,37        | 2,3,4,34,3<br>6,38,39,40 | 1  | Q4KLZ6                                                                              |
| 5652 | 1,5,6,7,8,3<br>3,35,38        | 2,3,4,34,3<br>6,37,39,40 | 0  |                                                                                     |
| 5653 | 1,5,6,7,8,3<br>3,35,39        | 2,3,4,34,3<br>6,37,38,40 | 2  | P29315,Q4KLZ6                                                                       |
| 5654 | 1,5,6,7,8,3<br>3,35,40        | 2,3,4,34,3<br>6,37,38,39 | 3  | P25031,P29315,Q4KLZ6                                                                |

|      |                        |                          |   |                                                                |
|------|------------------------|--------------------------|---|----------------------------------------------------------------|
| 5655 | 1,5,6,7,8,3<br>3,36,37 | 2,3,4,34,3<br>5,38,39,40 | 5 | P00774,P08723,P55091,P98089,Q62635                             |
| 5656 | 1,5,6,7,8,3<br>3,36,38 | 2,3,4,34,3<br>5,37,39,40 | 3 | P00774,P50115,P50116                                           |
| 5657 | 1,5,6,7,8,3<br>3,36,39 | 2,3,4,34,3<br>5,37,38,40 | 2 | P00774,Q4KLZ6                                                  |
| 5658 | 1,5,6,7,8,3<br>3,36,40 | 2,3,4,34,3<br>5,37,38,39 | 0 |                                                                |
| 5659 | 1,5,6,7,8,3<br>3,37,38 | 2,3,4,34,3<br>5,36,39,40 | 2 | P00774,Q6IG05                                                  |
| 5660 | 1,5,6,7,8,3<br>3,37,39 | 2,3,4,34,3<br>5,36,38,40 | 2 | P21674,Q4KLZ6                                                  |
| 5661 | 1,5,6,7,8,3<br>3,37,40 | 2,3,4,34,3<br>5,36,38,39 | 4 | P13432,P21674,Q62714,Q9QW07                                    |
| 5662 | 1,5,6,7,8,3<br>3,38,39 | 2,3,4,34,3<br>5,36,37,40 | 3 | P19132,P50115,P50116                                           |
| 5663 | 1,5,6,7,8,3<br>3,38,40 | 2,3,4,34,3<br>5,36,37,39 | 3 | P25031,P50116,Q62714                                           |
| 5664 | 1,5,6,7,8,3<br>3,39,40 | 2,3,4,34,3<br>5,36,37,38 | 4 | P21674,P25031,P29315,Q4KLZ6                                    |
| 5665 | 1,5,6,7,8,3<br>4,35,36 | 2,3,4,33,3<br>7,38,39,40 | 5 | P19223,P48199,P55091,Q9QX74,Q9Z1F2                             |
| 5666 | 1,5,6,7,8,3<br>4,35,37 | 2,3,4,33,3<br>6,38,39,40 | 3 | P06760,P35745,P55091                                           |
| 5667 | 1,5,6,7,8,3<br>4,35,38 | 2,3,4,33,3<br>6,37,39,40 | 1 | P35745                                                         |
| 5668 | 1,5,6,7,8,3<br>4,35,39 | 2,3,4,33,3<br>6,37,38,40 | 3 | P35745,Q9Z0V6,Q9Z1F2                                           |
| 5669 | 1,5,6,7,8,3<br>4,35,40 | 2,3,4,33,3<br>6,37,38,39 | 0 |                                                                |
| 5670 | 1,5,6,7,8,3<br>4,36,37 | 2,3,4,33,3<br>5,38,39,40 | 9 | P00774,P06760,P13432,P35745,P49134,P55091,P98089,Q62635,Q9JI85 |
| 5671 | 1,5,6,7,8,3<br>4,36,38 | 2,3,4,33,3<br>5,37,39,40 | 1 | P00774                                                         |
| 5672 | 1,5,6,7,8,3<br>4,36,39 | 2,3,4,33,3<br>5,37,38,40 | 3 | B0BNN3,Q9Z0V6,Q9Z1F2                                           |
| 5673 | 1,5,6,7,8,3<br>4,36,40 | 2,3,4,33,3<br>5,37,38,39 | 3 | B0BNN3,P13432,P49134                                           |
| 5674 | 1,5,6,7,8,3<br>4,37,38 | 2,3,4,33,3<br>5,36,39,40 | 4 | P06760,P35745,P49134,Q6IG05                                    |

|      |                        |                          |   |                                                                |
|------|------------------------|--------------------------|---|----------------------------------------------------------------|
| 5675 | 1,5,6,7,8,3<br>4,37,39 | 2,3,4,33,3<br>5,36,38,40 | 5 | P06760,P21674,P35745,P49134,Q9Z0V6                             |
| 5676 | 1,5,6,7,8,3<br>4,37,40 | 2,3,4,33,3<br>5,36,38,39 | 6 | P06760,P13432,P35745,P49134,Q62714,Q9QW07                      |
| 5677 | 1,5,6,7,8,3<br>4,38,39 | 2,3,4,33,3<br>5,36,37,40 | 2 | P35745,Q9Z0V6                                                  |
| 5678 | 1,5,6,7,8,3<br>4,38,40 | 2,3,4,33,3<br>5,36,37,39 | 4 | P15399,P25031,P49134,P50116                                    |
| 5679 | 1,5,6,7,8,3<br>4,39,40 | 2,3,4,33,3<br>5,36,37,38 | 3 | P21674,P49134,Q9Z0V6                                           |
| 5680 | 1,5,6,7,8,3<br>5,36,37 | 2,3,4,33,3<br>4,38,39,40 | 6 | F1M3L7,P00762,P01039,P19218,P35745,P55091                      |
| 5681 | 1,5,6,7,8,3<br>5,36,38 | 2,3,4,33,3<br>4,37,39,40 | 3 | P19218,P19814,P35745                                           |
| 5682 | 1,5,6,7,8,3<br>5,36,39 | 2,3,4,33,3<br>4,37,38,40 | 6 | B0BNN3,P23739,P35745,Q4KLZ6,Q5PQL7,Q9Z1F2                      |
| 5683 | 1,5,6,7,8,3<br>5,36,40 | 2,3,4,33,3<br>4,37,38,39 | 3 | B0BNN3,P35745,Q9EQV9                                           |
| 5684 | 1,5,6,7,8,3<br>5,37,38 | 2,3,4,33,3<br>4,36,39,40 | 4 | P19218,P19814,P35745,Q99041                                    |
| 5685 | 1,5,6,7,8,3<br>5,37,39 | 2,3,4,33,3<br>4,36,38,40 | 4 | P00762,P35745,P80299,Q4KLZ6                                    |
| 5686 | 1,5,6,7,8,3<br>5,37,40 | 2,3,4,33,3<br>4,36,38,39 | 5 | P00762,P35745,P80299,Q99041,Q9QW07                             |
| 5687 | 1,5,6,7,8,3<br>5,38,39 | 2,3,4,33,3<br>4,36,37,40 | 2 | P19814,P35745                                                  |
| 5688 | 1,5,6,7,8,3<br>5,38,40 | 2,3,4,33,3<br>4,36,37,39 | 3 | P19814,P25031,P35745                                           |
| 5689 | 1,5,6,7,8,3<br>5,39,40 | 2,3,4,33,3<br>4,36,37,38 | 4 | P00762,P29315,P35745,Q4KLZ6                                    |
| 5690 | 1,5,6,7,8,3<br>6,37,38 | 2,3,4,33,3<br>4,35,39,40 | 3 | P00774,P19218,P35745                                           |
| 5691 | 1,5,6,7,8,3<br>6,37,39 | 2,3,4,33,3<br>4,35,38,40 | 6 | P00762,P00774,P35745,P63029,P80299,P97829                      |
| 5692 | 1,5,6,7,8,3<br>6,37,40 | 2,3,4,33,3<br>4,35,38,39 | 9 | P00762,P06911,P13432,P35745,P49134,P80299,Q5GRG2,Q9QW07,Q9WUC4 |
| 5693 | 1,5,6,7,8,3<br>6,38,39 | 2,3,4,33,3<br>4,35,37,40 | 2 | P35745,P80020                                                  |
| 5694 | 1,5,6,7,8,3<br>6,38,40 | 2,3,4,33,3<br>4,35,37,39 | 2 | P25031,P80020                                                  |

|      |                         |                          |    |                                                                              |
|------|-------------------------|--------------------------|----|------------------------------------------------------------------------------|
| 5695 | 1,5,6,7,8,3<br>6,39,40  | 2,3,4,33,3<br>4,35,37,38 | 4  | B0BNN3,P00762,P35745,P80020                                                  |
| 5696 | 1,5,6,7,8,3<br>7,38,39  | 2,3,4,33,3<br>4,35,36,40 | 4  | D3ZUC6,P00762,P35745,P49134                                                  |
| 5697 | 1,5,6,7,8,3<br>7,38,40  | 2,3,4,33,3<br>4,35,36,39 | 10 | D3ZUC6,P00762,P01835,P25031,P35745,P49134,Q5GRG2,Q62714,Q99041,Q9QW07        |
| 5698 | 1,5,6,7,8,3<br>7,39,40  | 2,3,4,33,3<br>4,35,36,38 | 8  | D3ZUC6,P00762,P21674,P35745,P49134,P80299,Q9QW07,Q9WUC4                      |
| 5699 | 1,5,6,7,8,3<br>8,39,40  | 2,3,4,33,3<br>4,35,36,37 | 6  | D3ZUC6,P25031,P35745,P51740,P80020,Q6PCU2                                    |
| 5700 | 1,5,6,7,33,<br>34,35,36 | 2,3,4,8,37,<br>38,39,40  | 8  | D4A5U3,P08494,P08721,P11883,P36376,Q5BJY9,Q62635,Q8CIZ5                      |
| 5701 | 1,5,6,7,33,<br>34,35,37 | 2,3,4,8,36,<br>38,39,40  | 6  | D4A5U3,P08721,P36376,Q5BJY9,Q62635,Q8CIZ5                                    |
| 5702 | 1,5,6,7,33,<br>34,35,38 | 2,3,4,8,36,<br>37,39,40  | 2  | P08721,P50116                                                                |
| 5703 | 1,5,6,7,33,<br>34,35,39 | 2,3,4,8,36,<br>37,38,40  | 1  | P08721                                                                       |
| 5704 | 1,5,6,7,33,<br>34,35,40 | 2,3,4,8,36,<br>37,38,39  | 3  | P08721,Q5BJY9,Q9EQS0                                                         |
| 5705 | 1,5,6,7,33,<br>34,36,37 | 2,3,4,8,35,<br>38,39,40  | 11 | D4A5U3,P00774,P08494,P08721,P11883,P36376,P55091,P98089,Q5BJY9,Q62635,Q8CIZ5 |
| 5706 | 1,5,6,7,33,<br>34,36,38 | 2,3,4,8,35,<br>37,39,40  | 6  | P00774,P08494,P08721,P36376,P36860,P50116                                    |
| 5707 | 1,5,6,7,33,<br>34,36,39 | 2,3,4,8,35,<br>37,38,40  | 5  | P00774,P08494,P08721,P36860,Q62635                                           |
| 5708 | 1,5,6,7,33,<br>34,36,40 | 2,3,4,8,35,<br>37,38,39  | 5  | P08494,P08721,P11883,P36376,P36860                                           |
| 5709 | 1,5,6,7,33,<br>34,37,38 | 2,3,4,8,35,<br>36,39,40  | 5  | P00774,P36376,Q5BJY9,Q62714,Q6AY61                                           |
| 5710 | 1,5,6,7,33,<br>34,37,39 | 2,3,4,8,35,<br>36,38,40  | 4  | P00774,P02793;Q7TP54,P21674,Q62635                                           |
| 5711 | 1,5,6,7,33,<br>34,37,40 | 2,3,4,8,35,<br>36,38,39  | 4  | P36376,Q5BJY9,Q62714,Q9QW07                                                  |
| 5712 | 1,5,6,7,33,<br>34,38,39 | 2,3,4,8,35,<br>36,37,40  | 3  | P02793;Q7TP54,P19132,P50116                                                  |
| 5713 | 1,5,6,7,33,<br>34,38,40 | 2,3,4,8,35,<br>36,37,39  | 3  | P36860,P50116,Q62714                                                         |
| 5714 | 1,5,6,7,33,<br>34,39,40 | 2,3,4,8,35,<br>36,37,38  | 1  | P21674                                                                       |

|      |                                              |    |                                                                                         |
|------|----------------------------------------------|----|-----------------------------------------------------------------------------------------|
| 5715 | 1,5,6,7,33, 2,3,4,8,34,<br>35,36,37 38,39,40 | 12 | D4A5U3,P00762,P05539,P08721,P11883,P20762,P36376,P55091,Q5BJY9,Q62635,Q63618,Q8CI<br>Z5 |
| 5716 | 1,5,6,7,33, 2,3,4,8,34,<br>35,36,38 37,39,40 | 3  | P05539,P08721,Q923V8                                                                    |
| 5717 | 1,5,6,7,33, 2,3,4,8,34,<br>35,36,39 37,38,40 | 5  | P00762,P05539,P08721,P23739,Q4KLZ6                                                      |
| 5718 | 1,5,6,7,33, 2,3,4,8,34,<br>35,36,40 37,38,39 | 7  | D4A5U3,P00762,P05539,P08721,P20762,Q63618,Q9EQS0                                        |
| 5719 | 1,5,6,7,33, 2,3,4,8,34,<br>35,37,38 36,39,40 | 3  | P00762,P05539,Q5BJY9                                                                    |
| 5720 | 1,5,6,7,33, 2,3,4,8,34,<br>35,37,39 36,38,40 | 4  | P00762,P02625,P05539,Q4KLZ6                                                             |
| 5721 | 1,5,6,7,33, 2,3,4,8,34,<br>35,37,40 36,38,39 | 5  | P00762,P02625,P05539,P20762,Q5BJY9                                                      |
| 5722 | 1,5,6,7,33, 2,3,4,8,34,<br>35,38,39 36,37,40 | 1  | P05539                                                                                  |
| 5723 | 1,5,6,7,33, 2,3,4,8,34,<br>35,38,40 36,37,39 | 1  | P05539                                                                                  |
| 5724 | 1,5,6,7,33, 2,3,4,8,34,<br>35,39,40 36,37,38 | 5  | P00762,P02625,P05539,P29315,Q4KLZ6                                                      |
| 5725 | 1,5,6,7,33, 2,3,4,8,34,<br>36,37,38 35,39,40 | 5  | P00762,P00774,P20762,P36376,P36860                                                      |
| 5726 | 1,5,6,7,33, 2,3,4,8,34,<br>36,37,39 35,38,40 | 5  | P00762,P00774,P36860,P98089,Q62635                                                      |
| 5727 | 1,5,6,7,33, 2,3,4,8,34,<br>36,37,40 35,38,39 | 8  | P00762,P05539,P11883,P20762,P25809,P36376,P36860,Q5BJY9                                 |
| 5728 | 1,5,6,7,33, 2,3,4,8,34,<br>36,38,39 35,37,40 | 5  | P00774,P05539,P36860,P50116,Q923V8                                                      |
| 5729 | 1,5,6,7,33, 2,3,4,8,34,<br>36,38,40 35,37,39 | 6  | P05539,P20762,P25809,P36860,P50116,Q923V8                                               |
| 5730 | 1,5,6,7,33, 2,3,4,8,34,<br>36,39,40 35,37,38 | 4  | P00762,P05539,P25809,P36860                                                             |
| 5731 | 1,5,6,7,33, 2,3,4,8,34,<br>37,38,39 35,36,40 | 2  | P00762,P36860                                                                           |
| 5732 | 1,5,6,7,33, 2,3,4,8,34,<br>37,38,40 35,36,39 | 6  | P00762,P05539,P20762,P36860,Q62714,Q9Z1F2                                               |
| 5733 | 1,5,6,7,33, 2,3,4,8,34,<br>37,39,40 35,36,38 | 7  | O70417,P00762,P02625,P05539,P21674,P25809,P36860                                        |
| 5734 | 1,5,6,7,33, 2,3,4,8,34,<br>38,39,40 35,36,37 | 5  | P00762,P05539,P36860,P50116,P51740                                                      |

|      |                                              |                                                    |
|------|----------------------------------------------|----------------------------------------------------|
| 5735 | 1,5,6,7,34, 2,3,4,8,33,<br>35,36,37 38,39,40 | 7 D4A5U3,P36376,P47967,P55091,Q5BJY9,Q62635,Q8CIZ5 |
| 5736 | 1,5,6,7,34, 2,3,4,8,33,<br>35,36,38 37,39,40 | 1 Q9QWN8                                           |
| 5737 | 1,5,6,7,34, 2,3,4,8,33,<br>35,36,39 37,38,40 | 3 P23739,Q5PQL7,Q9Z1F2                             |
| 5738 | 1,5,6,7,34, 2,3,4,8,33,<br>35,36,40 37,38,39 | 1 Q9EQS0                                           |
| 5739 | 1,5,6,7,34, 2,3,4,8,33,<br>35,37,38 36,39,40 | 1 P35745                                           |
| 5740 | 1,5,6,7,34, 2,3,4,8,33,<br>35,37,39 36,38,40 | 1 P35745                                           |
| 5741 | 1,5,6,7,34, 2,3,4,8,33,<br>35,37,40 36,38,39 | 1 Q5BJY9                                           |
| 5742 | 1,5,6,7,34, 2,3,4,8,33,<br>35,38,39 36,37,40 | 0                                                  |
| 5743 | 1,5,6,7,34, 2,3,4,8,33,<br>35,38,40 36,37,39 | 0                                                  |
| 5744 | 1,5,6,7,34, 2,3,4,8,33,<br>35,39,40 36,37,38 | 0                                                  |
| 5745 | 1,5,6,7,34, 2,3,4,8,33,<br>36,37,38 35,39,40 | 3 P00774,P01835,P36376                             |
| 5746 | 1,5,6,7,34, 2,3,4,8,33,<br>36,37,39 35,38,40 | 4 O70417,P00774,P01835,Q62635                      |
| 5747 | 1,5,6,7,34, 2,3,4,8,33,<br>36,37,40 35,38,39 | 3 P01835,P36376,P49134                             |
| 5748 | 1,5,6,7,34, 2,3,4,8,33,<br>36,38,39 35,37,40 | 1 P36860                                           |
| 5749 | 1,5,6,7,34, 2,3,4,8,33,<br>36,38,40 35,37,39 | 2 P36860,P50116                                    |
| 5750 | 1,5,6,7,34, 2,3,4,8,33,<br>36,39,40 35,37,38 | 1 B0BNN3                                           |
| 5751 | 1,5,6,7,34, 2,3,4,8,33,<br>37,38,39 35,36,40 | 4 P01835,P35745,P49134,Q6AY61                      |
| 5752 | 1,5,6,7,34, 2,3,4,8,33,<br>37,38,40 35,36,39 | 5 P01835,P20767,P49134,Q62714,Q6AY61               |
| 5753 | 1,5,6,7,34, 2,3,4,8,33,<br>37,39,40 35,36,38 | 5 O70417,P01835,P21674,P49134,Q6AY61               |
| 5754 | 1,5,6,7,34, 2,3,4,8,33,<br>38,39,40 35,36,37 | 2 P50116,P51740                                    |

|      |                                              |                                                                          |
|------|----------------------------------------------|--------------------------------------------------------------------------|
| 5755 | 1,5,6,7,35, 2,3,4,8,33,<br>36,37,38 34,39,40 | 4 P00762,P19218,P19814,P35745                                            |
| 5756 | 1,5,6,7,35, 2,3,4,8,33,<br>36,37,39 34,38,40 | 3 P00762,P02625,P35745                                                   |
| 5757 | 1,5,6,7,35, 2,3,4,8,33,<br>36,37,40 34,38,39 | 7 D4A5U3,P00762,P02625,P19132,P20762,Q9EQS0,Q9WUC4                       |
| 5758 | 1,5,6,7,35, 2,3,4,8,33,<br>36,38,39 34,37,40 | 4 P00762,P19814,P35745,Q923V8                                            |
| 5759 | 1,5,6,7,35, 2,3,4,8,33,<br>36,38,40 34,37,39 | 3 P00762,P19814,Q9QWN8                                                   |
| 5760 | 1,5,6,7,35, 2,3,4,8,33,<br>36,39,40 34,37,38 | 4 B0BNN3,P00762,P02625,Q9EQS0                                            |
| 5761 | 1,5,6,7,35, 2,3,4,8,33,<br>37,38,39 34,36,40 | 4 P00762,P02625,P19814,P35745                                            |
| 5762 | 1,5,6,7,35, 2,3,4,8,33,<br>37,38,40 34,36,39 | 5 P00762,P19814,P35745,Q63514,Q99MH3                                     |
| 5763 | 1,5,6,7,35, 2,3,4,8,33,<br>37,39,40 34,36,38 | 4 P00762,P02625,P35745,Q9WUC4                                            |
| 5764 | 1,5,6,7,35, 2,3,4,8,33,<br>38,39,40 34,36,37 | 6 O55004,P00762,P02625,P19814,P26772,P51740                              |
| 5765 | 1,5,6,7,36, 2,3,4,8,33,<br>37,38,39 34,35,40 | 5 P00762,P00774,P01835,P35745,P36860                                     |
| 5766 | 1,5,6,7,36, 2,3,4,8,33,<br>37,38,40 34,35,39 | 7 P00762,P01835,P19629,P20762,P25809,P36860,Q9WUC4                       |
| 5767 | 1,5,6,7,36, 2,3,4,8,33,<br>37,39,40 34,35,38 | 8 O70417,P00762,P01835,P02625,P19629,P25809,P36860,Q9WUC4                |
| 5768 | 1,5,6,7,36, 2,3,4,8,33,<br>38,39,40 34,35,37 | 5 P00762,P25809,P36860,P51740,P80020                                     |
| 5769 | 1,5,6,7,37, 2,3,4,8,33,<br>38,39,40 34,35,36 | 10 D3ZUC6,P00762,P01835,P02625,P26772,P35745,P36860,P51740,Q5I0D7,Q9WUC4 |
| 5770 | 1,5,6,8,33, 2,3,4,7,37,<br>34,35,36 38,39,40 | 5 O89117,P08494,P08721,Q5QE79,Q9QX74                                     |
| 5771 | 1,5,6,8,33, 2,3,4,7,36,<br>34,35,37 38,39,40 | 2 O89117,P13432                                                          |
| 5772 | 1,5,6,8,33, 2,3,4,7,36,<br>34,35,38 37,39,40 | 2 O89117,Q6IG05                                                          |
| 5773 | 1,5,6,8,33, 2,3,4,7,36,<br>34,35,39 37,38,40 | 0                                                                        |
| 5774 | 1,5,6,8,33, 2,3,4,7,36,<br>34,35,40 37,38,39 | 1 P13432                                                                 |



|      |                                              |                                                    |
|------|----------------------------------------------|----------------------------------------------------|
| 5775 | 1,5,6,8,33, 2,3,4,7,35,<br>34,36,37 38,39,40 | 7 P00774,P08494,P13432,P55091,P98089,Q5QE79,Q62635 |
| 5776 | 1,5,6,8,33, 2,3,4,7,35,<br>34,36,38 37,39,40 | 3 P00774,P08494,Q6IG05                             |
| 5777 | 1,5,6,8,33, 2,3,4,7,35,<br>34,36,39 37,38,40 | 4 P00774,P08494,P08649,P13432                      |
| 5778 | 1,5,6,8,33, 2,3,4,7,35,<br>34,36,40 37,38,39 | 2 P08494,P13432                                    |
| 5779 | 1,5,6,8,33, 2,3,4,7,35,<br>34,37,38 36,39,40 | 2 P00774,Q6IG05                                    |
| 5780 | 1,5,6,8,33, 2,3,4,7,35,<br>34,37,39 36,38,40 | 4 P02793;Q7TP54,P13432,P21674,Q9QWN8               |
| 5781 | 1,5,6,8,33, 2,3,4,7,35,<br>34,37,40 36,38,39 | 3 P13432,Q62714,Q9QW07                             |
| 5782 | 1,5,6,8,33, 2,3,4,7,35,<br>34,38,39 36,37,40 | 2 P02793;Q7TP54,P19132                             |
| 5783 | 1,5,6,8,33, 2,3,4,7,35,<br>34,38,40 36,37,39 | 3 P15399,P25031,Q6IG05                             |
| 5784 | 1,5,6,8,33, 2,3,4,7,35,<br>34,39,40 36,37,38 | 4 P13432,P15399,P21674,P25031                      |
| 5785 | 1,5,6,8,33, 2,3,4,7,34,<br>35,36,37 38,39,40 | 4 F1M3L7,P20766,P55091,Q64093                      |
| 5786 | 1,5,6,8,33, 2,3,4,7,34,<br>35,36,38 37,39,40 | 0                                                  |
| 5787 | 1,5,6,8,33, 2,3,4,7,34,<br>35,36,39 37,38,40 | 3 P23739,P62804,Q4KLZ6                             |
| 5788 | 1,5,6,8,33, 2,3,4,7,34,<br>35,36,40 37,38,39 | 3 P01681,Q63618,Q64093                             |
| 5789 | 1,5,6,8,33, 2,3,4,7,34,<br>35,37,38 36,39,40 | 1 P20766                                           |
| 5790 | 1,5,6,8,33, 2,3,4,7,34,<br>35,37,39 36,38,40 | 2 Q4KLZ6,Q80WL1                                    |
| 5791 | 1,5,6,8,33, 2,3,4,7,34,<br>35,37,40 36,38,39 | 5 P13432,P20766,P80299,Q64093,Q9QW07               |
| 5792 | 1,5,6,8,33, 2,3,4,7,34,<br>35,38,39 36,37,40 | 0                                                  |
| 5793 | 1,5,6,8,33, 2,3,4,7,34,<br>35,38,40 36,37,39 | 1 P25031                                           |
| 5794 | 1,5,6,8,33, 2,3,4,7,34,<br>35,39,40 36,37,38 | 4 P25031,P29315,Q4KLZ6,Q80WL1                      |

|      |                                              |                                                    |
|------|----------------------------------------------|----------------------------------------------------|
| 5795 | 1,5,6,8,33, 2,3,4,7,34,<br>36,37,38 35,39,40 | 2 P00774,P20766                                    |
| 5796 | 1,5,6,8,33, 2,3,4,7,34,<br>36,37,39 35,38,40 | 1 P00774                                           |
| 5797 | 1,5,6,8,33, 2,3,4,7,34,<br>36,37,40 35,38,39 | 3 P13432,P20766,Q9QW07                             |
| 5798 | 1,5,6,8,33, 2,3,4,7,34,<br>36,38,39 35,37,40 | 1 P19132                                           |
| 5799 | 1,5,6,8,33, 2,3,4,7,34,<br>36,38,40 35,37,39 | 2 P25031,P36860                                    |
| 5800 | 1,5,6,8,33, 2,3,4,7,34,<br>36,39,40 35,37,38 | 1 P25031                                           |
| 5801 | 1,5,6,8,33, 2,3,4,7,34,<br>37,38,39 35,36,40 | 1 Q80WL1                                           |
| 5802 | 1,5,6,8,33, 2,3,4,7,34,<br>37,38,40 35,36,39 | 4 P20766,P25031,Q62714,Q9Z1F2                      |
| 5803 | 1,5,6,8,33, 2,3,4,7,34,<br>37,39,40 35,36,38 | 7 P13432,P21674,P25031,P80299,Q80WL1,Q9QW07,Q9QWN8 |
| 5804 | 1,5,6,8,33, 2,3,4,7,34,<br>38,39,40 35,36,37 | 5 P19132,P25031,P51740,P97840,Q80WL1               |
| 5805 | 1,5,6,8,34, 2,3,4,7,33,<br>35,36,37 38,39,40 | 7 F1M3L7,P01039,P02770,P13432,P55091,Q5RKI1,Q64093 |
| 5806 | 1,5,6,8,34, 2,3,4,7,33,<br>35,36,38 37,39,40 | 2 Q5RKI1,Q6AYQ8                                    |
| 5807 | 1,5,6,8,34, 2,3,4,7,33,<br>35,36,39 37,38,40 | 2 P23739,Q9Z1F2                                    |
| 5808 | 1,5,6,8,34, 2,3,4,7,33,<br>35,36,40 37,38,39 | 3 P13432,Q5RKI1,Q6AYQ8                             |
| 5809 | 1,5,6,8,34, 2,3,4,7,33,<br>35,37,38 36,39,40 | 2 P35745,Q5RKI1                                    |
| 5810 | 1,5,6,8,34, 2,3,4,7,33,<br>35,37,39 36,38,40 | 2 P13432,P35745                                    |
| 5811 | 1,5,6,8,34, 2,3,4,7,33,<br>35,37,40 36,38,39 | 4 P13432,Q5RKI1,Q64093,Q9QW07                      |
| 5812 | 1,5,6,8,34, 2,3,4,7,33,<br>35,38,39 36,37,40 | 1 P35745                                           |
| 5813 | 1,5,6,8,34, 2,3,4,7,33,<br>35,38,40 36,37,39 | 3 P15399,P97580,Q5RKI1                             |
| 5814 | 1,5,6,8,34, 2,3,4,7,33,<br>35,39,40 36,37,38 | 2 P13432,P15399                                    |

|      |                                              |                                                           |
|------|----------------------------------------------|-----------------------------------------------------------|
| 5815 | 1,5,6,8,34, 2,3,4,7,33,<br>36,37,38 35,39,40 | 3 P00774,Q5RKI1,Q6IG05                                    |
| 5816 | 1,5,6,8,34, 2,3,4,7,33,<br>36,37,39 35,38,40 | 3 P00774,P13432,P35745                                    |
| 5817 | 1,5,6,8,34, 2,3,4,7,33,<br>36,37,40 35,38,39 | 4 P13432,P49134,Q5RKI1,Q9QW07                             |
| 5818 | 1,5,6,8,34, 2,3,4,7,33,<br>36,38,39 35,37,40 | 0                                                         |
| 5819 | 1,5,6,8,34, 2,3,4,7,33,<br>36,38,40 35,37,39 | 2 P15399,Q5RKI1                                           |
| 5820 | 1,5,6,8,34, 2,3,4,7,33,<br>36,39,40 35,37,38 | 3 B0BNN3,P13432,P15399                                    |
| 5821 | 1,5,6,8,34, 2,3,4,7,33,<br>37,38,39 35,36,40 | 2 P35745,P49134                                           |
| 5822 | 1,5,6,8,34, 2,3,4,7,33,<br>37,38,40 35,36,39 | 5 P13432,P15399,P49134,Q5RKI1,Q62714                      |
| 5823 | 1,5,6,8,34, 2,3,4,7,33,<br>37,39,40 35,36,38 | 4 P13432,P15399,P21674,P49134                             |
| 5824 | 1,5,6,8,34, 2,3,4,7,33,<br>38,39,40 35,36,37 | 5 P15399,P25031,P51740,P97580,P97840                      |
| 5825 | 1,5,6,8,35, 2,3,4,7,33,<br>36,37,38 34,39,40 | 7 F1M3L7,P19218,P19814,P20766,P35745,Q5RKI1,Q6AYQ8        |
| 5826 | 1,5,6,8,35, 2,3,4,7,33,<br>36,37,39 34,38,40 | 4 F1M3L7,P23739,P35745,P80299                             |
| 5827 | 1,5,6,8,35, 2,3,4,7,33,<br>36,37,40 34,38,39 | 8 F1M3L7,P13432,P20766,P35745,P60905,P80299,Q5RKI1,Q64093 |
| 5828 | 1,5,6,8,35, 2,3,4,7,33,<br>36,38,39 34,37,40 | 3 P19814,P23739,P35745                                    |
| 5829 | 1,5,6,8,35, 2,3,4,7,33,<br>36,38,40 34,37,39 | 3 P19814,Q5RKI1,Q6AYQ8                                    |
| 5830 | 1,5,6,8,35, 2,3,4,7,33,<br>36,39,40 34,37,38 | 4 B0BNN3,P23739,P54921,P80299                             |
| 5831 | 1,5,6,8,35, 2,3,4,7,33,<br>37,38,39 34,36,40 | 3 P19814,P35745,P80299                                    |
| 5832 | 1,5,6,8,35, 2,3,4,7,33,<br>37,38,40 34,36,39 | 6 P19814,P20766,P35745,P80299,Q5RKI1,Q64093               |
| 5833 | 1,5,6,8,35, 2,3,4,7,33,<br>37,39,40 34,36,38 | 3 P35745,P80299,P82471                                    |
| 5834 | 1,5,6,8,35, 2,3,4,7,33,<br>38,39,40 34,36,37 | 5 P19814,P25031,P35745,P51740,P54921                      |

|      |                                              |                                                                                                          |
|------|----------------------------------------------|----------------------------------------------------------------------------------------------------------|
| 5835 | 1,5,6,8,36, 2,3,4,7,33,<br>37,38,39 34,35,40 | 1 P35745                                                                                                 |
| 5836 | 1,5,6,8,36, 2,3,4,7,33,<br>37,38,40 34,35,39 | 7 P06911,P19629,P20766,P35745,P80299,Q5GRG2,Q5RKI1                                                       |
| 5837 | 1,5,6,8,36, 2,3,4,7,33,<br>37,39,40 34,35,38 | 4 P13432,P19629,P35745,P80299                                                                            |
| 5838 | 1,5,6,8,36, 2,3,4,7,33,<br>38,39,40 34,35,37 | 4 P25031,P51740,P54921,P80020                                                                            |
| 5839 | 1,5,6,8,37, 2,3,4,7,33,<br>38,39,40 34,35,36 | 6 D3ZUC6,P25031,P35745,P51740,P80299,Q5I0D7                                                              |
| 5840 | 1,5,6,33,3 2,3,4,7,8,3<br>4,35,36,37 8,39,40 | 14 D4A5U3,P08494,P08721,P11883,P35280,P36376,P55091,P98089,Q5BJY9,Q5QE79,Q62635,Q63<br>618,Q6PCU2,Q8CIZ5 |
| 5841 | 1,5,6,33,3 2,3,4,7,8,3<br>4,35,36,38 7,39,40 | 2 P08494,P08721                                                                                          |
| 5842 | 1,5,6,33,3 2,3,4,7,8,3<br>4,35,36,39 7,38,40 | 4 P08494,P08721,P23739,P35280                                                                            |
| 5843 | 1,5,6,33,3 2,3,4,7,8,3<br>4,35,36,40 7,38,39 | 8 D4A5U3,P08494,P08721,P11883,P35280,Q5QE79,Q63618,Q9EQS0                                                |
| 5844 | 1,5,6,33,3 2,3,4,7,8,3<br>4,35,37,38 6,39,40 | 1 Q5BJY9                                                                                                 |
| 5845 | 1,5,6,33,3 2,3,4,7,8,3<br>4,35,37,39 6,38,40 | 2 O70417,P35280                                                                                          |
| 5846 | 1,5,6,33,3 2,3,4,7,8,3<br>4,35,37,40 6,38,39 | 3 P35280,Q5BJY9,Q9EQS0                                                                                   |
| 5847 | 1,5,6,33,3 2,3,4,7,8,3<br>4,35,38,39 6,37,40 | 1 P19132                                                                                                 |
| 5848 | 1,5,6,33,3 2,3,4,7,8,3<br>4,35,38,40 6,37,39 | 1 P63029                                                                                                 |
| 5849 | 1,5,6,33,3 2,3,4,7,8,3<br>4,35,39,40 6,37,38 | 2 P35280,Q9EQS0                                                                                          |
| 5850 | 1,5,6,33,3 2,3,4,7,8,3<br>4,36,37,38 5,39,40 | 3 P00774,P36376,P36860                                                                                   |
| 5851 | 1,5,6,33,3 2,3,4,7,8,3<br>4,36,37,39 5,38,40 | 7 O70417,P00774,P08494,P35280,P36860,P98089,Q62635                                                       |
| 5852 | 1,5,6,33,3 2,3,4,7,8,3<br>4,36,37,40 5,38,39 | 8 O70417,P08494,P11883,P20762,P35280,P36376,P36860,P98089                                                |
| 5853 | 1,5,6,33,3 2,3,4,7,8,3<br>4,36,38,39 5,37,40 | 4 P00774,P08494,P19132,P36860                                                                            |
| 5854 | 1,5,6,33,3 2,3,4,7,8,3<br>4,36,38,40 5,37,39 | 3 P08494,P36860,P63029                                                                                   |

|      |                                              |                                                                                                             |
|------|----------------------------------------------|-------------------------------------------------------------------------------------------------------------|
| 5855 | 1,5,6,33,3 2,3,4,7,8,3<br>4,36,39,40 5,37,38 | 3 P08494,P35280,P36860                                                                                      |
| 5856 | 1,5,6,33,3 2,3,4,7,8,3<br>4,37,38,39 5,36,40 | 3 P02793;Q7TP54,P19132,P36860                                                                               |
| 5857 | 1,5,6,33,3 2,3,4,7,8,3<br>4,37,38,40 5,36,39 | 3 P36860,Q62714,Q9Z1F2                                                                                      |
| 5858 | 1,5,6,33,3 2,3,4,7,8,3<br>4,37,39,40 5,36,38 | 4 O70417,P21674,P35280,P36860                                                                               |
| 5859 | 1,5,6,33,3 2,3,4,7,8,3<br>4,38,39,40 5,36,37 | 3 P19132,P36860,P51740                                                                                      |
| 5860 | 1,5,6,33,3 2,3,4,7,8,3<br>5,36,37,38 4,39,40 | 5 D4A5U3,P20762,P20766,P36860,Q9Z0V6                                                                        |
| 5861 | 1,5,6,33,3 2,3,4,7,8,3<br>5,36,37,39 4,38,40 | 4 O70417,P20766,P23739,P35280                                                                               |
| 5862 | 1,5,6,33,3 2,3,4,7,8,3<br>5,36,37,40 4,38,39 | 15 D4A5U3,F1M3L7,P11883,P12368,P20762,P20766,P35280,P36860,P50503,P60905,Q5BJY9,Q63618,Q64093,Q9EQS0,Q9Z0V6 |
| 5863 | 1,5,6,33,3 2,3,4,7,8,3<br>5,36,38,39 4,37,40 | 3 P36860,P62804,Q923V8                                                                                      |
| 5864 | 1,5,6,33,3 2,3,4,7,8,3<br>5,36,38,40 4,37,39 | 7 P20762,P20766,P36860,P63029,Q63618,Q923V8,Q9Z0V6                                                          |
| 5865 | 1,5,6,33,3 2,3,4,7,8,3<br>5,36,39,40 4,37,38 | 5 P23739,P35280,P36860,P62804,Q9EQS0                                                                        |
| 5866 | 1,5,6,33,3 2,3,4,7,8,3<br>5,37,38,39 4,36,40 | 2 P20766,P97615                                                                                             |
| 5867 | 1,5,6,33,3 2,3,4,7,8,3<br>5,37,38,40 4,36,39 | 7 P20762,P20766,P36860,P97615,Q5I0J9,Q9Z0V6,Q9Z1F2                                                          |
| 5868 | 1,5,6,33,3 2,3,4,7,8,3<br>5,37,39,40 4,36,38 | 6 O70417,P00762,P02625,P20766,P35280,Q9EQS0                                                                 |
| 5869 | 1,5,6,33,3 2,3,4,7,8,3<br>5,38,39,40 4,36,37 | 4 P36860,P51740,P55091,P62804                                                                               |
| 5870 | 1,5,6,33,3 2,3,4,7,8,3<br>6,37,38,39 4,35,40 | 3 P00774,P20766,P36860                                                                                      |
| 5871 | 1,5,6,33,3 2,3,4,7,8,3<br>6,37,38,40 4,35,39 | 6 P20762,P20766,P25809,P36860,Q9Z0V6,Q9Z1F2                                                                 |
| 5872 | 1,5,6,33,3 2,3,4,7,8,3<br>6,37,39,40 4,35,38 | 7 O70417,P00762,P19629,P20766,P25809,P35280,P36860                                                          |
| 5873 | 1,5,6,33,3 2,3,4,7,8,3<br>6,38,39,40 4,35,37 | 4 P25809,P36860,P51740,Q923V8                                                                               |
| 5874 | 1,5,6,33,3 2,3,4,7,8,3<br>7,38,39,40 4,35,36 | 4 P20766,P36860,P51740,Q9Z1F2                                                                               |

|      |                                              |                                                                                 |
|------|----------------------------------------------|---------------------------------------------------------------------------------|
| 5875 | 1,5,6,34,3 2,3,4,7,8,3<br>5,36,37,38 3,39,40 | 3 D3ZTE0,Q5RKI1,Q6AYQ8                                                          |
| 5876 | 1,5,6,34,3 2,3,4,7,8,3<br>5,36,37,39 3,38,40 | 2 O70417,P35280                                                                 |
| 5877 | 1,5,6,34,3 2,3,4,7,8,3<br>5,36,37,40 3,38,39 | 7 D4A5U3,O70417,P11883,P35280,Q5RKI1,Q64093,Q9EQS0                              |
| 5878 | 1,5,6,34,3 2,3,4,7,8,3<br>5,36,38,39 3,37,40 | 0                                                                               |
| 5879 | 1,5,6,34,3 2,3,4,7,8,3<br>5,36,38,40 3,37,39 | 2 Q5RKI1,Q6AYQ8                                                                 |
| 5880 | 1,5,6,34,3 2,3,4,7,8,3<br>5,36,39,40 3,37,38 | 3 P23739,P35280,Q9EQS0                                                          |
| 5881 | 1,5,6,34,3 2,3,4,7,8,3<br>5,37,38,39 3,36,40 | 0                                                                               |
| 5882 | 1,5,6,34,3 2,3,4,7,8,3<br>5,37,38,40 3,36,39 | 2 Q5RKI1,Q63514                                                                 |
| 5883 | 1,5,6,34,3 2,3,4,7,8,3<br>5,37,39,40 3,36,38 | 2 O70417,P35280                                                                 |
| 5884 | 1,5,6,34,3 2,3,4,7,8,3<br>5,38,39,40 3,36,37 | 1 P51740                                                                        |
| 5885 | 1,5,6,34,3 2,3,4,7,8,3<br>6,37,38,39 3,35,40 | 2 P00774,P36860                                                                 |
| 5886 | 1,5,6,34,3 2,3,4,7,8,3<br>6,37,38,40 3,35,39 | 2 P36860,Q5RKI1                                                                 |
| 5887 | 1,5,6,34,3 2,3,4,7,8,3<br>6,37,39,40 3,35,38 | 4 O70417,P19629,P35280,P36860                                                   |
| 5888 | 1,5,6,34,3 2,3,4,7,8,3<br>6,38,39,40 3,35,37 | 2 P36860,P51740                                                                 |
| 5889 | 1,5,6,34,3 2,3,4,7,8,3<br>7,38,39,40 3,35,36 | 2 P36860,P51740                                                                 |
| 5890 | 1,5,6,35,3 2,3,4,7,8,3<br>6,37,38,39 3,34,40 | 5 P00762,P19814,P20766,P35745,Q63475                                            |
| 5891 | 1,5,6,35,3 2,3,4,7,8,3<br>6,37,38,40 3,34,39 | 10 D3ZTE0,P00762,P19814,P20762,P20766,P36860,Q5RKI1,Q63514,Q6AYQ8,Q9Z0V6        |
| 5892 | 1,5,6,35,3 2,3,4,7,8,3<br>6,37,39,40 3,34,38 | 8 O70417,P00762,P02625,P20766,P35280,P80299,Q63475,Q9EQS0                       |
| 5893 | 1,5,6,35,3 2,3,4,7,8,3<br>6,38,39,40 3,34,37 | 5 O55004,P19814,P36860,P51740,Q6AYQ8                                            |
| 5894 | 1,5,6,35,3 2,3,4,7,8,3<br>7,38,39,40 3,34,36 | 11 O55004,P00762,P02625,P19814,P20766,P26772,P35745,P51740,P97615,Q5I0D7,Q9QX74 |

|      |                          |                         |                                                                          |
|------|--------------------------|-------------------------|--------------------------------------------------------------------------|
| 5895 | 1,5,6,36,3<br>7,38,39,40 | 2,3,4,7,8,3<br>3,34,35  | 7 P00762,P19629,P20766,P36860,P51740,Q63475,Q9QX74                       |
| 5896 | 1,5,7,8,33,<br>34,35,36  | 2,3,4,6,37,<br>38,39,40 | 4 P06760,P08721,P51740,Q9QX74                                            |
| 5897 | 1,5,7,8,33,<br>34,35,37  | 2,3,4,6,36,<br>38,39,40 | 3 P06760,P51740,Q9QX74                                                   |
| 5898 | 1,5,7,8,33,<br>34,35,38  | 2,3,4,6,36,<br>37,39,40 | 3 P06760,P09656,Q9QX74                                                   |
| 5899 | 1,5,7,8,33,<br>34,35,39  | 2,3,4,6,36,<br>37,38,40 | 5 P06760,P09656,Q4KLZ6,Q9QX74,Q9Z0V6                                     |
| 5900 | 1,5,7,8,33,<br>34,35,40  | 2,3,4,6,36,<br>37,38,39 | 2 P09656,Q9QX74                                                          |
| 5901 | 1,5,7,8,33,<br>34,36,37  | 2,3,4,6,35,<br>38,39,40 | 10 P00774,P06760,P08723,P13432,P47967,P51740,P55091,P98089,Q62635,Q9QX74 |
| 5902 | 1,5,7,8,33,<br>34,36,38  | 2,3,4,6,35,<br>37,39,40 | 3 P00774,P06760,Q9QX74                                                   |
| 5903 | 1,5,7,8,33,<br>34,36,39  | 2,3,4,6,35,<br>37,38,40 | 4 P00774,P06760,Q9QX74,Q9Z0V6                                            |
| 5904 | 1,5,7,8,33,<br>34,36,40  | 2,3,4,6,35,<br>37,38,39 | 3 P06760,P13432,Q9QX74                                                   |
| 5905 | 1,5,7,8,33,<br>34,37,38  | 2,3,4,6,35,<br>36,39,40 | 3 P00774,P06760,Q6IG05                                                   |
| 5906 | 1,5,7,8,33,<br>34,37,39  | 2,3,4,6,35,<br>36,38,40 | 5 P02793;Q7TP54,P06760,P21674,Q9QX74,Q9Z0V6                              |
| 5907 | 1,5,7,8,33,<br>34,37,40  | 2,3,4,6,35,<br>36,38,39 | 6 P06760,P13432,P21674,P30120,Q62714,Q9QW07                              |
| 5908 | 1,5,7,8,33,<br>34,38,39  | 2,3,4,6,35,<br>36,37,40 | 6 P02793;Q7TP54,P06760,P09656,P19132,Q9QX74,Q9Z0V6                       |
| 5909 | 1,5,7,8,33,<br>34,38,40  | 2,3,4,6,35,<br>36,37,39 | 1 P09656                                                                 |
| 5910 | 1,5,7,8,33,<br>34,39,40  | 2,3,4,6,35,<br>36,37,38 | 4 P09656,P21674,Q9QX74,Q9Z0V6                                            |
| 5911 | 1,5,7,8,33,<br>35,36,37  | 2,3,4,6,34,<br>38,39,40 | 7 F1M3L7,P06760,P08723,P47967,P51740,P55091,Q4KLZ6                       |
| 5912 | 1,5,7,8,33,<br>35,36,38  | 2,3,4,6,34,<br>37,39,40 | 0                                                                        |
| 5913 | 1,5,7,8,33,<br>35,36,39  | 2,3,4,6,34,<br>37,38,40 | 2 P23739,Q4KLZ6                                                          |
| 5914 | 1,5,7,8,33,<br>35,36,40  | 2,3,4,6,34,<br>37,38,39 | 2 P01681,Q4KLZ6                                                          |

|      |                                              |                                                    |
|------|----------------------------------------------|----------------------------------------------------|
| 5915 | 1,5,7,8,33, 2,3,4,6,34,<br>35,37,38 36,39,40 | 0                                                  |
| 5916 | 1,5,7,8,33, 2,3,4,6,34,<br>35,37,39 36,38,40 | 2 Q4KLZ6,Q80WL1                                    |
| 5917 | 1,5,7,8,33, 2,3,4,6,34,<br>35,37,40 36,38,39 | 0                                                  |
| 5918 | 1,5,7,8,33, 2,3,4,6,34,<br>35,38,39 36,37,40 | 3 O55145,P19132,Q4KLZ6                             |
| 5919 | 1,5,7,8,33, 2,3,4,6,34,<br>35,38,40 36,37,39 | 0                                                  |
| 5920 | 1,5,7,8,33, 2,3,4,6,34,<br>35,39,40 36,37,38 | 5 O55145,P09656,P29315,Q4KLZ6,Q80WL1               |
| 5921 | 1,5,7,8,33, 2,3,4,6,34,<br>36,37,38 35,39,40 | 3 P00774,P06760,P08723                             |
| 5922 | 1,5,7,8,33, 2,3,4,6,34,<br>36,37,39 35,38,40 | 3 P00774,P06760,Q4KLZ6                             |
| 5923 | 1,5,7,8,33, 2,3,4,6,34,<br>36,37,40 35,38,39 | 3 P08723,P13432,P30120                             |
| 5924 | 1,5,7,8,33, 2,3,4,6,34,<br>36,38,39 35,37,40 | 1 P19132                                           |
| 5925 | 1,5,7,8,33, 2,3,4,6,34,<br>36,38,40 35,37,39 | 0                                                  |
| 5926 | 1,5,7,8,33, 2,3,4,6,34,<br>36,39,40 35,37,38 | 2 P01681,Q4KLZ6                                    |
| 5927 | 1,5,7,8,33, 2,3,4,6,34,<br>37,38,39 35,36,40 | 1 Q80WL1                                           |
| 5928 | 1,5,7,8,33, 2,3,4,6,34,<br>37,38,40 35,36,39 | 1 Q62714                                           |
| 5929 | 1,5,7,8,33, 2,3,4,6,34,<br>37,39,40 35,36,38 | 3 P21674,Q80WL1,Q9QWN8                             |
| 5930 | 1,5,7,8,33, 2,3,4,6,34,<br>38,39,40 35,36,37 | 6 O55145,P09656,P19132,P25031,Q5I0D7,Q80WL1        |
| 5931 | 1,5,7,8,34, 2,3,4,6,33,<br>35,36,37 38,39,40 | 7 P01039,P06760,P35745,P47967,P51740,P55091,Q9QX74 |
| 5932 | 1,5,7,8,34, 2,3,4,6,33,<br>35,36,38 37,39,40 | 2 P06760,P35745                                    |
| 5933 | 1,5,7,8,34, 2,3,4,6,33,<br>35,36,39 37,38,40 | 7 P01039,P06760,P23739,P35745,Q9QX74,Q9Z0V6,Q9Z1F2 |
| 5934 | 1,5,7,8,34, 2,3,4,6,33,<br>35,36,40 37,38,39 | 1 P35745                                           |



|      |                                              |                                             |
|------|----------------------------------------------|---------------------------------------------|
| 5935 | 1,5,7,8,34, 2,3,4,6,33,<br>35,37,38 36,39,40 | 2 P06760,P35745                             |
| 5936 | 1,5,7,8,34, 2,3,4,6,33,<br>35,37,39 36,38,40 | 4 P01039,P06760,P35745,Q9Z0V6               |
| 5937 | 1,5,7,8,34, 2,3,4,6,33,<br>35,37,40 36,38,39 | 4 P06760,P13432,P35745,P49134               |
| 5938 | 1,5,7,8,34, 2,3,4,6,33,<br>35,38,39 36,37,40 | 4 P09656,P35745,Q9WTT6,Q9Z0V6               |
| 5939 | 1,5,7,8,34, 2,3,4,6,33,<br>35,38,40 36,37,39 | 2 P09656,P35745                             |
| 5940 | 1,5,7,8,34, 2,3,4,6,33,<br>35,39,40 36,37,38 | 3 P09656,P35745,Q9Z0V6                      |
| 5941 | 1,5,7,8,34, 2,3,4,6,33,<br>36,37,38 35,39,40 | 4 P00774,P06760,P35745,P49134               |
| 5942 | 1,5,7,8,34, 2,3,4,6,33,<br>36,37,39 35,38,40 | 5 P01039,P06760,P35745,P49134,Q9Z0V6        |
| 5943 | 1,5,7,8,34, 2,3,4,6,33,<br>36,37,40 35,38,39 | 5 P06760,P13432,P35745,P49134,Q811M5        |
| 5944 | 1,5,7,8,34, 2,3,4,6,33,<br>36,38,39 35,37,40 | 3 P06760,P35745,Q9Z0V6                      |
| 5945 | 1,5,7,8,34, 2,3,4,6,33,<br>36,38,40 35,37,39 | 1 P35745                                    |
| 5946 | 1,5,7,8,34, 2,3,4,6,33,<br>36,39,40 35,37,38 | 2 P13432,P35745                             |
| 5947 | 1,5,7,8,34, 2,3,4,6,33,<br>37,38,39 35,36,40 | 4 P06760,P35745,P49134,Q9Z0V6               |
| 5948 | 1,5,7,8,34, 2,3,4,6,33,<br>37,38,40 35,36,39 | 4 P06760,P35745,P49134,Q62714               |
| 5949 | 1,5,7,8,34, 2,3,4,6,33,<br>37,39,40 35,36,38 | 6 P06760,P13432,P21674,P35745,P49134,Q9Z0V6 |
| 5950 | 1,5,7,8,34, 2,3,4,6,33,<br>38,39,40 35,36,37 | 5 P09656,P19132,P35745,P49134,Q9Z0V6        |
| 5951 | 1,5,7,8,35, 2,3,4,6,33,<br>36,37,38 34,39,40 | 4 P01039,P19218,P19814,P35745               |
| 5952 | 1,5,7,8,35, 2,3,4,6,33,<br>36,37,39 34,38,40 | 5 P01039,P23739,P35745,P80299,Q4KLZ6        |
| 5953 | 1,5,7,8,35, 2,3,4,6,33,<br>36,37,40 34,38,39 | 5 F1M3L7,P35745,P60905,P80299,Q9WUC4        |
| 5954 | 1,5,7,8,35, 2,3,4,6,33,<br>36,38,39 34,37,40 | 3 P19814,P23739,P35745                      |

|      |                                              |    |                                                                                     |
|------|----------------------------------------------|----|-------------------------------------------------------------------------------------|
| 5955 | 1,5,7,8,35, 2,3,4,6,33,<br>36,38,40 34,37,39 | 2  | P19814,P35745                                                                       |
| 5956 | 1,5,7,8,35, 2,3,4,6,33,<br>36,39,40 34,37,38 | 3  | P23739,P35745,Q4KLZ6                                                                |
| 5957 | 1,5,7,8,35, 2,3,4,6,33,<br>37,38,39 34,36,40 | 4  | O55145,P08649,P19814,P35745                                                         |
| 5958 | 1,5,7,8,35, 2,3,4,6,33,<br>37,38,40 34,36,39 | 4  | P08649,P19814,P35745,Q99MH3                                                         |
| 5959 | 1,5,7,8,35, 2,3,4,6,33,<br>37,39,40 34,36,38 | 6  | D3ZUC6,O55145,P08649,P35745,P80299,Q9WUC4                                           |
| 5960 | 1,5,7,8,35, 2,3,4,6,33,<br>38,39,40 34,36,37 | 6  | O55145,P08649,P09656,P19814,P35745,Q5I0D7                                           |
| 5961 | 1,5,7,8,36, 2,3,4,6,33,<br>37,38,39 34,35,40 | 3  | D3ZUC6,P35745,Q8K1G0                                                                |
| 5962 | 1,5,7,8,36, 2,3,4,6,33,<br>37,38,40 34,35,39 | 4  | D3ZUC6,P35745,Q8K1G0,Q9WUC4                                                         |
| 5963 | 1,5,7,8,36, 2,3,4,6,33,<br>37,39,40 34,35,38 | 7  | D3ZUC6,P35745,P80299,P97829,Q812E4,Q8K1G0,Q9WUC4                                    |
| 5964 | 1,5,7,8,36, 2,3,4,6,33,<br>38,39,40 34,35,37 | 5  | D3ZUC6,P35745,P80020,Q5I0D7,Q8K1G0                                                  |
| 5965 | 1,5,7,8,37, 2,3,4,6,33,<br>38,39,40 34,35,36 | 10 | D3ZUC6,O55145,P08649,P35745,P49134,Q498R7,Q5I0D7,Q6PCU2,Q8K1G0,Q9WUC4               |
| 5966 | 1,5,7,33,3 2,3,4,6,8,3<br>4,35,36,37 8,39,40 | 12 | D4A5U3,P08721,P36376,P47967,P51740,P54921,P55091,P98089,Q5BJY9,Q62635,Q8CIZ5,Q9R168 |
| 5967 | 1,5,7,33,3 2,3,4,6,8,3<br>4,35,36,38 7,39,40 | 4  | P08721,P36376,P82471,Q9R168                                                         |
| 5968 | 1,5,7,33,3 2,3,4,6,8,3<br>4,35,36,39 7,38,40 | 2  | P08721,P23739                                                                       |
| 5969 | 1,5,7,33,3 2,3,4,6,8,3<br>4,35,36,40 7,38,39 | 3  | P08721,P36376,Q9EQS0                                                                |
| 5970 | 1,5,7,33,3 2,3,4,6,8,3<br>4,35,37,38 6,39,40 | 4  | P36376,P54921,Q5BJY9,Q9R168                                                         |
| 5971 | 1,5,7,33,3 2,3,4,6,8,3<br>4,35,37,39 6,38,40 | 1  | O70417                                                                              |
| 5972 | 1,5,7,33,3 2,3,4,6,8,3<br>4,35,37,40 6,38,39 | 2  | P36376,Q5BJY9                                                                       |
| 5973 | 1,5,7,33,3 2,3,4,6,8,3<br>4,35,38,39 6,37,40 | 2  | P09656,P19132                                                                       |
| 5974 | 1,5,7,33,3 2,3,4,6,8,3<br>4,35,38,40 6,37,39 | 2  | P09656,Q9R168                                                                       |

|      |                                              |                                      |
|------|----------------------------------------------|--------------------------------------|
| 5975 | 1,5,7,33,3 2,3,4,6,8,3<br>4,35,39,40 6,37,38 | 1 P09656                             |
| 5976 | 1,5,7,33,3 2,3,4,6,8,3<br>4,36,37,38 5,39,40 | 5 P00774,P36376,P36860,P54921,Q9R168 |
| 5977 | 1,5,7,33,3 2,3,4,6,8,3<br>4,36,37,39 5,38,40 | 4 O70417,P00774,P98089,Q62635        |
| 5978 | 1,5,7,33,3 2,3,4,6,8,3<br>4,36,37,40 5,38,39 | 4 P36376,P36860,P98089,Q5BJY9        |
| 5979 | 1,5,7,33,3 2,3,4,6,8,3<br>4,36,38,39 5,37,40 | 3 P19132,P36860,P82471               |
| 5980 | 1,5,7,33,3 2,3,4,6,8,3<br>4,36,38,40 5,37,39 | 2 P36376,P36860                      |
| 5981 | 1,5,7,33,3 2,3,4,6,8,3<br>4,36,39,40 5,37,38 | 1 P36860                             |
| 5982 | 1,5,7,33,3 2,3,4,6,8,3<br>4,37,38,39 5,36,40 | 3 P02793;Q7TP54,P19132,Q6AY61        |
| 5983 | 1,5,7,33,3 2,3,4,6,8,3<br>4,37,38,40 5,36,39 | 3 P36376,Q62714,Q6AY61               |
| 5984 | 1,5,7,33,3 2,3,4,6,8,3<br>4,37,39,40 5,36,38 | 3 O70417,P19218,P21674               |
| 5985 | 1,5,7,33,3 2,3,4,6,8,3<br>4,38,39,40 5,36,37 | 3 P09656,P19132,P36860               |
| 5986 | 1,5,7,33,3 2,3,4,6,8,3<br>5,36,37,38 4,39,40 | 2 P20762,P36376                      |
| 5987 | 1,5,7,33,3 2,3,4,6,8,3<br>5,36,37,39 4,38,40 | 3 P23739,P97580,Q4KLZ6               |
| 5988 | 1,5,7,33,3 2,3,4,6,8,3<br>5,36,37,40 4,38,39 | 5 D4A5U3,P20762,P36376,Q5BJY9,Q63618 |
| 5989 | 1,5,7,33,3 2,3,4,6,8,3<br>5,36,38,39 4,37,40 | 2 P23739,Q03191                      |
| 5990 | 1,5,7,33,3 2,3,4,6,8,3<br>5,36,38,40 4,37,39 | 3 P20762,P36376,Q03191               |
| 5991 | 1,5,7,33,3 2,3,4,6,8,3<br>5,36,39,40 4,37,38 | 3 P02625,P23739,Q4KLZ6               |
| 5992 | 1,5,7,33,3 2,3,4,6,8,3<br>5,37,38,39 4,36,40 | 2 P08649,P97615                      |
| 5993 | 1,5,7,33,3 2,3,4,6,8,3<br>5,37,38,40 4,36,39 | 5 P08649,P20762,P36376,P97615,Q9Z1F2 |
| 5994 | 1,5,7,33,3 2,3,4,6,8,3<br>5,37,39,40 4,36,38 | 3 O70417,P02625,P08649               |

|      |                                              |                                                    |
|------|----------------------------------------------|----------------------------------------------------|
| 5995 | 1,5,7,33,3 2,3,4,6,8,3<br>5,38,39,40 4,36,37 | 2 O55145,P08649                                    |
| 5996 | 1,5,7,33,3 2,3,4,6,8,3<br>6,37,38,39 4,35,40 | 2 P00774,P36860                                    |
| 5997 | 1,5,7,33,3 2,3,4,6,8,3<br>6,37,38,40 4,35,39 | 3 P20762,P36376,P36860                             |
| 5998 | 1,5,7,33,3 2,3,4,6,8,3<br>6,37,39,40 4,35,38 | 3 O70417,P36860,Q9WUC4                             |
| 5999 | 1,5,7,33,3 2,3,4,6,8,3<br>6,38,39,40 4,35,37 | 2 P36860,Q03191                                    |
| 6000 | 1,5,7,33,3 2,3,4,6,8,3<br>7,38,39,40 4,35,36 | 3 P08649,P36860,Q5I0D7                             |
| 6001 | 1,5,7,34,3 2,3,4,6,8,3<br>5,36,37,38 3,39,40 | 3 D3ZTE0,P35745,P36376                             |
| 6002 | 1,5,7,34,3 2,3,4,6,8,3<br>5,36,37,39 3,38,40 | 5 O70417,P01039,P23739,P25031,P35745               |
| 6003 | 1,5,7,34,3 2,3,4,6,8,3<br>5,36,37,40 3,38,39 | 2 P35745,P36376                                    |
| 6004 | 1,5,7,34,3 2,3,4,6,8,3<br>5,36,38,39 3,37,40 | 1 P35745                                           |
| 6005 | 1,5,7,34,3 2,3,4,6,8,3<br>5,36,38,40 3,37,39 | 1 P36376                                           |
| 6006 | 1,5,7,34,3 2,3,4,6,8,3<br>5,36,39,40 3,37,38 | 1 P23739                                           |
| 6007 | 1,5,7,34,3 2,3,4,6,8,3<br>5,37,38,39 3,36,40 | 5 P08649,P35745,P42854,Q99PP0,Q9QZQ5               |
| 6008 | 1,5,7,34,3 2,3,4,6,8,3<br>5,37,38,40 3,36,39 | 7 P08649,P35745,P36376,Q63514,Q99MH3,Q99PP0,Q9QZQ5 |
| 6009 | 1,5,7,34,3 2,3,4,6,8,3<br>5,37,39,40 3,36,38 | 5 O70417,P08649,P35745,Q99PP0,Q9QZQ5               |
| 6010 | 1,5,7,34,3 2,3,4,6,8,3<br>5,38,39,40 3,36,37 | 5 P08649,P09656,P35745,Q99PP0,Q9QZQ5               |
| 6011 | 1,5,7,34,3 2,3,4,6,8,3<br>6,37,38,39 3,35,40 | 2 P35745,Q5PPH0                                    |
| 6012 | 1,5,7,34,3 2,3,4,6,8,3<br>6,37,38,40 3,35,39 | 4 P35745,P36376,P36860,Q5PPH0                      |
| 6013 | 1,5,7,34,3 2,3,4,6,8,3<br>6,37,39,40 3,35,38 | 2 O70417,P35745                                    |
| 6014 | 1,5,7,34,3 2,3,4,6,8,3<br>6,38,39,40 3,35,37 | 2 P36860,Q5PPH0                                    |

|      |                          |                        |    |                                                                                                                               |
|------|--------------------------|------------------------|----|-------------------------------------------------------------------------------------------------------------------------------|
| 6015 | 1,5,7,34,3<br>7,38,39,40 | 2,3,4,6,8,3<br>3,35,36 | 6  | P08649,P35745,P49134,Q6AY61,Q99PP0,Q9QZQ5                                                                                     |
| 6016 | 1,5,7,35,3<br>6,37,38,39 | 2,3,4,6,8,3<br>3,34,40 | 8  | P00762,P08649,P19814,P35745,P42854,Q05702,Q63475,Q99PP0                                                                       |
| 6017 | 1,5,7,35,3<br>6,37,38,40 | 2,3,4,6,8,3<br>3,34,39 | 12 | D3ZTE0,P08649,P19814,P20762,P35745,P36376,Q05702,Q63514,Q63532,Q99MH3,Q99PP0,Q9WUC4                                           |
| 6018 | 1,5,7,35,3<br>6,37,39,40 | 2,3,4,6,8,3<br>3,34,38 | 9  | O70417,P00762,P02625,P08649,P35745,Q05702,Q63475,Q99PP0,Q9WUC4                                                                |
| 6019 | 1,5,7,35,3<br>6,38,39,40 | 2,3,4,6,8,3<br>3,34,37 | 6  | O55004,P08649,P19814,P35745,Q05702,Q99PP0                                                                                     |
| 6020 | 1,5,7,35,3<br>7,38,39,40 | 2,3,4,6,8,3<br>3,34,36 | 18 | O55004,O55145,P00762,P02625,P08649,P19814,P26772,P35745,P42854,P97615,Q05702,Q5I0D7,Q63475,Q6AYC4,Q99MH3,Q99PP0,Q9QZQ5,Q9WUC4 |
| 6021 | 1,5,7,36,3<br>7,38,39,40 | 2,3,4,6,8,3<br>3,34,35 | 11 | O89117,P00762,P08649,P35745,P36860,P42854,Q5I0D7,Q5PPH0,Q63475,Q99PP0,Q9WUC4                                                  |
| 6022 | 1,5,8,33,3<br>4,35,36,37 | 2,3,4,6,7,3<br>8,39,40 | 7  | F1M3L7,P06760,P13432,P51740,P55091,Q5QE79,Q9QX74                                                                              |
| 6023 | 1,5,8,33,3<br>4,35,36,38 | 2,3,4,6,7,3<br>7,39,40 | 0  |                                                                                                                               |
| 6024 | 1,5,8,33,3<br>4,35,36,39 | 2,3,4,6,7,3<br>7,38,40 | 2  | P23739,Q9QX74                                                                                                                 |
| 6025 | 1,5,8,33,3<br>4,35,36,40 | 2,3,4,6,7,3<br>7,38,39 | 3  | P01681,P13432,Q5QE79                                                                                                          |
| 6026 | 1,5,8,33,3<br>4,35,37,38 | 2,3,4,6,7,3<br>6,39,40 | 1  | Q6IG05                                                                                                                        |
| 6027 | 1,5,8,33,3<br>4,35,37,39 | 2,3,4,6,7,3<br>6,38,40 | 1  | Q9QWN8                                                                                                                        |
| 6028 | 1,5,8,33,3<br>4,35,37,40 | 2,3,4,6,7,3<br>6,38,39 | 1  | P13432                                                                                                                        |
| 6029 | 1,5,8,33,3<br>4,35,38,39 | 2,3,4,6,7,3<br>6,37,40 | 3  | P02793;Q7TP54,P09656,P19132                                                                                                   |
| 6030 | 1,5,8,33,3<br>4,35,38,40 | 2,3,4,6,7,3<br>6,37,39 | 1  | P09656                                                                                                                        |
| 6031 | 1,5,8,33,3<br>4,35,39,40 | 2,3,4,6,7,3<br>6,37,38 | 2  | P09656,P13432                                                                                                                 |
| 6032 | 1,5,8,33,3<br>4,36,37,38 | 2,3,4,6,7,3<br>5,39,40 | 3  | P00774,P06760,Q6IG05                                                                                                          |
| 6033 | 1,5,8,33,3<br>4,36,37,39 | 2,3,4,6,7,3<br>5,38,40 | 5  | P00774,P02793;Q7TP54,P06760,P13432,P98089                                                                                     |
| 6034 | 1,5,8,33,3<br>4,36,37,40 | 2,3,4,6,7,3<br>5,38,39 | 3  | P13432,P30120,Q5QE79                                                                                                          |

|      |                                              |                                             |
|------|----------------------------------------------|---------------------------------------------|
| 6035 | 1,5,8,33,3 2,3,4,6,7,3<br>4,36,38,39 5,37,40 | 3 P02793;Q7TP54,P19132,Q99041               |
| 6036 | 1,5,8,33,3 2,3,4,6,7,3<br>4,36,38,40 5,37,39 | 0                                           |
| 6037 | 1,5,8,33,3 2,3,4,6,7,3<br>4,36,39,40 5,37,38 | 1 P13432                                    |
| 6038 | 1,5,8,33,3 2,3,4,6,7,3<br>4,37,38,39 5,36,40 | 3 P02793;Q7TP54,P19132,Q9QWN8               |
| 6039 | 1,5,8,33,3 2,3,4,6,7,3<br>4,37,38,40 5,36,39 | 2 P13432,Q62714                             |
| 6040 | 1,5,8,33,3 2,3,4,6,7,3<br>4,37,39,40 5,36,38 | 3 P13432,P21674,Q9QWN8                      |
| 6041 | 1,5,8,33,3 2,3,4,6,7,3<br>4,38,39,40 5,36,37 | 2 P09656,P19132                             |
| 6042 | 1,5,8,33,3 2,3,4,6,7,3<br>5,36,37,38 4,39,40 | 3 F1M3L7,P20766,Q80WL1                      |
| 6043 | 1,5,8,33,3 2,3,4,6,7,3<br>5,36,37,39 4,38,40 | 6 F1M3L7,P20766,P23739,P80299,Q4KLZ6,Q80WL1 |
| 6044 | 1,5,8,33,3 2,3,4,6,7,3<br>5,36,37,40 4,38,39 | 6 F1M3L7,P13432,P20766,P60905,P80299,Q80WL1 |
| 6045 | 1,5,8,33,3 2,3,4,6,7,3<br>5,36,38,39 4,37,40 | 3 P19132,P23739,Q80WL1                      |
| 6046 | 1,5,8,33,3 2,3,4,6,7,3<br>5,36,38,40 4,37,39 | 2 P01681,Q80WL1                             |
| 6047 | 1,5,8,33,3 2,3,4,6,7,3<br>5,36,39,40 4,37,38 | 4 P01681,P23739,Q4KLZ6,Q80WL1               |
| 6048 | 1,5,8,33,3 2,3,4,6,7,3<br>5,37,38,39 4,36,40 | 2 P20766,Q80WL1                             |
| 6049 | 1,5,8,33,3 2,3,4,6,7,3<br>5,37,38,40 4,36,39 | 3 P20766,Q80WL1,Q9Z1F2                      |
| 6050 | 1,5,8,33,3 2,3,4,6,7,3<br>5,37,39,40 4,36,38 | 4 P20766,P80299,Q80WL1,Q9QWN8               |
| 6051 | 1,5,8,33,3 2,3,4,6,7,3<br>5,38,39,40 4,36,37 | 4 O55145,P11598,P19132,Q80WL1               |
| 6052 | 1,5,8,33,3 2,3,4,6,7,3<br>6,37,38,39 4,35,40 | 2 P20766,Q80WL1                             |
| 6053 | 1,5,8,33,3 2,3,4,6,7,3<br>6,37,38,40 4,35,39 | 3 P20766,Q80WL1,Q9Z1F2                      |
| 6054 | 1,5,8,33,3 2,3,4,6,7,3<br>6,37,39,40 4,35,38 | 5 P13432,P20766,P80299,Q80WL1,Q9QWN8        |

|      |                                              |                                                                                 |
|------|----------------------------------------------|---------------------------------------------------------------------------------|
| 6055 | 1,5,8,33,3 2,3,4,6,7,3<br>6,38,39,40 4,35,37 | 3 P01681,P19132,Q80WL1                                                          |
| 6056 | 1,5,8,33,3 2,3,4,6,7,3<br>7,38,39,40 4,35,36 | 5 P19132,P20766,Q5I0D7,Q80WL1,Q9QWN8                                            |
| 6057 | 1,5,8,34,3 2,3,4,6,7,3<br>5,36,37,38 3,39,40 | 3 P01039,P35745,Q5RKI1                                                          |
| 6058 | 1,5,8,34,3 2,3,4,6,7,3<br>5,36,37,39 3,38,40 | 4 P01039,P13432,P23739,P35745                                                   |
| 6059 | 1,5,8,34,3 2,3,4,6,7,3<br>5,36,37,40 3,38,39 | 5 F1M3L7,P13432,P35745,P60905,Q5RKI1                                            |
| 6060 | 1,5,8,34,3 2,3,4,6,7,3<br>5,36,38,39 3,37,40 | 2 P23739,P35745                                                                 |
| 6061 | 1,5,8,34,3 2,3,4,6,7,3<br>5,36,38,40 3,37,39 | 3 P35745,Q5RKI1,Q6AYQ8                                                          |
| 6062 | 1,5,8,34,3 2,3,4,6,7,3<br>5,36,39,40 3,37,38 | 3 P13432,P23739,P35745                                                          |
| 6063 | 1,5,8,34,3 2,3,4,6,7,3<br>5,37,38,39 3,36,40 | 2 P35745,Q99PP0                                                                 |
| 6064 | 1,5,8,34,3 2,3,4,6,7,3<br>5,37,38,40 3,36,39 | 3 P35745,Q5RKI1,Q99PP0                                                          |
| 6065 | 1,5,8,34,3 2,3,4,6,7,3<br>5,37,39,40 3,36,38 | 3 P13432,P35745,Q99PP0                                                          |
| 6066 | 1,5,8,34,3 2,3,4,6,7,3<br>5,38,39,40 3,36,37 | 5 P09656,P11598,P15399,P35745,Q99PP0                                            |
| 6067 | 1,5,8,34,3 2,3,4,6,7,3<br>6,37,38,39 3,35,40 | 1 P35745                                                                        |
| 6068 | 1,5,8,34,3 2,3,4,6,7,3<br>6,37,38,40 3,35,39 | 5 P13432,P35745,P49134,Q5PPH0,Q5RKI1                                            |
| 6069 | 1,5,8,34,3 2,3,4,6,7,3<br>6,37,39,40 3,35,38 | 3 P13432,P35745,P49134                                                          |
| 6070 | 1,5,8,34,3 2,3,4,6,7,3<br>6,38,39,40 3,35,37 | 2 P19132,P35745                                                                 |
| 6071 | 1,5,8,34,3 2,3,4,6,7,3<br>7,38,39,40 3,35,36 | 5 P13432,P35745,P49134,Q5I0D7,Q99PP0                                            |
| 6072 | 1,5,8,35,3 2,3,4,6,7,3<br>6,37,38,39 3,34,40 | 8 F1M3L7,P20766,P23739,P35745,P80299,Q80WL1,Q8K1G0,Q99PP0                       |
| 6073 | 1,5,8,35,3 2,3,4,6,7,3<br>6,37,38,40 3,34,39 | 10 F1M3L7,P19814,P20766,P35745,P60905,P80299,Q5RKI1,Q62894,Q8K1G0,Q99PP0        |
| 6074 | 1,5,8,35,3 2,3,4,6,7,3<br>6,37,39,40 3,34,38 | 10 F1M3L7,O54800;Q5DWV2,P23739,P35745,P50116,P60905,P80299,Q80WL1,Q8K1G0,Q99PP0 |

|      |                               |                        |    |                                                                              |
|------|-------------------------------|------------------------|----|------------------------------------------------------------------------------|
| 6075 | 1,5,8,35,3<br>6,38,39,40      | 2,3,4,6,7,3<br>3,34,37 | 7  | P11598,P23739,P35745,Q5I0D7,Q80WL1,Q8K1G0,Q99PP0                             |
| 6076 | 1,5,8,35,3<br>7,38,39,40      | 2,3,4,6,7,3<br>3,34,36 | 10 | O55145,P08649,P26772,P35745,P80299,P97615,Q5I0D7,Q80WL1,Q8K1G0,Q99PP0        |
| 6077 | 1,5,8,36,3<br>7,38,39,40      | 2,3,4,6,7,3<br>3,34,35 | 8  | D3ZUC6,P19629,P35745,P80299,Q5I0D7,Q80WL1,Q8K1G0,Q99PP0                      |
| 6078 | 1,5,33,34,<br>35,36,37,3<br>8 | 2,3,4,6,7,8<br>,39,40  | 4  | P20762,P20766,P22273,P36376                                                  |
| 6079 | 1,5,33,34,<br>35,36,37,3<br>9 | 2,3,4,6,7,8<br>,38,40  | 5  | O70417,P22273,P23739,P35280,P36374                                           |
| 6080 | 1,5,33,34,<br>35,36,37,4<br>0 | 2,3,4,6,7,8<br>,38,39  | 11 | D4A5U3,O70417,P20762,P20766,P22273,P35280,P36374,P36376,P50115,Q5QE79,Q9EQS0 |
| 6081 | 1,5,33,34,<br>35,36,38,3<br>9 | 2,3,4,6,7,8<br>,37,40  | 5  | P02631,P19132,P22273,P23739,Q99041                                           |
| 6082 | 1,5,33,34,<br>35,36,38,4<br>0 | 2,3,4,6,7,8<br>,37,39  | 5  | P20762,P22273,P23593,P63029,Q63617                                           |
| 6083 | 1,5,33,34,<br>35,36,39,4<br>0 | 2,3,4,6,7,8<br>,37,38  | 7  | O70417,P22273,P23739,P35280,Q63617,Q99041,Q9EQS0                             |
| 6084 | 1,5,33,34,<br>35,37,38,3<br>9 | 2,3,4,6,7,8<br>,36,40  | 2  | P42854,Q99PP0                                                                |
| 6085 | 1,5,33,34,<br>35,37,38,4<br>0 | 2,3,4,6,7,8<br>,36,39  | 5  | P20762,P20766,P36376,Q99PP0,Q9Z1F2                                           |
| 6086 | 1,5,33,34,<br>35,37,39,4<br>0 | 2,3,4,6,7,8<br>,36,38  | 5  | O70417,P19218,P35280,P50115,Q99PP0                                           |
| 6087 | 1,5,33,34,<br>35,38,39,4<br>0 | 2,3,4,6,7,8<br>,36,37  | 5  | P09656,P11598,P19132,P22273,Q63617                                           |
| 6088 | 1,5,33,34,<br>36,37,38,3<br>9 | 2,3,4,6,7,8<br>,35,40  | 8  | P00774,P02793,Q7TP54,P19132,P36374,P36860,P85971,Q63149,Q99041               |



|      |                               |                       |    |                                                                                                   |
|------|-------------------------------|-----------------------|----|---------------------------------------------------------------------------------------------------|
| 6089 | 1,5,33,34,<br>36,37,38,4<br>0 | 2,3,4,6,7,8<br>,35,39 | 9  | P20762,P20766,P23593,P36374,P36376,P36860,P85971,Q63149,Q9Z1F2                                    |
| 6090 | 1,5,33,34,<br>36,37,39,4<br>0 | 2,3,4,6,7,8<br>,35,38 | 7  | O70417,P19218,P35280,P36374,P36860,P85971,Q63149                                                  |
| 6091 | 1,5,33,34,<br>36,38,39,4<br>0 | 2,3,4,6,7,8<br>,35,37 | 6  | P19132,P22273,P36860,P85971,Q63617,Q99041                                                         |
| 6092 | 1,5,33,34,<br>37,38,39,4<br>0 | 2,3,4,6,7,8<br>,35,36 | 5  | P19132,P19218,P36860,P85971,Q99PP0                                                                |
| 6093 | 1,5,33,35,<br>36,37,38,3<br>9 | 2,3,4,6,7,8<br>,34,40 | 5  | P02631,P20766,P42854,Q05702,Q99PP0                                                                |
| 6094 | 1,5,33,35,<br>36,37,38,4<br>0 | 2,3,4,6,7,8<br>,34,39 | 8  | D3ZTE0,P20762,P20766,P36376,P36860,Q99PP0,Q9Z0V6,Q9Z1F2                                           |
| 6095 | 1,5,33,35,<br>36,37,39,4<br>0 | 2,3,4,6,7,8<br>,34,38 | 8  | O70417,P02625,P20762,P20766,P23739,P35280,P36374,Q99PP0                                           |
| 6096 | 1,5,33,35,<br>36,38,39,4<br>0 | 2,3,4,6,7,8<br>,34,37 | 8  | P02631,P11598,P22273,P23739,P36860,Q03191,Q05702,Q63617                                           |
| 6097 | 1,5,33,35,<br>37,38,39,4<br>0 | 2,3,4,6,7,8<br>,34,36 | 14 | P02625,P08649,P20766,P26772,P42854,P97615,Q05702,Q5I0D7,Q6AYC4,Q80WL1,Q91XN4,Q99PP0,Q9QZQ5,Q9Z1F2 |
| 6098 | 1,5,33,36,<br>37,38,39,4<br>0 | 2,3,4,6,7,8<br>,34,35 | 8  | P20762,P20766,P36374,P36860,P42854,P85971,Q99PP0,Q9Z1F2                                           |
| 6099 | 1,5,34,35,<br>36,37,38,3<br>9 | 2,3,4,6,7,8<br>,33,40 | 10 | O54858,P02631,P22273,P35745,P42854,P80202,P85971,Q91XN4,Q99PP0,Q9QZQ5                             |
| 6100 | 1,5,34,35,<br>36,37,38,4<br>0 | 2,3,4,6,7,8<br>,33,39 | 13 | D3ZTE0,P02631,P20762,P20766,P22273,P23593,P36376,P80202,P85971,Q5RKI1,Q63514,Q99PP0,Q9QZQ5        |
| 6101 | 1,5,34,35,<br>36,37,39,4<br>0 | 2,3,4,6,7,8<br>,33,38 | 8  | O70417,P02631,P22273,P23739,P35280,P35745,P50115,Q99PP0                                           |

|      |                               |                         |    |                                                                                                                                      |
|------|-------------------------------|-------------------------|----|--------------------------------------------------------------------------------------------------------------------------------------|
| 6102 | 1,5,34,35,<br>36,38,39,4<br>0 | 2,3,4,6,7,8<br>,33,37   | 7  | P02631,P11598,P22273,Q05702,Q63617,Q99PP0,Q9QZQ5                                                                                     |
| 6103 | 1,5,34,35,<br>37,38,39,4<br>0 | 2,3,4,6,7,8<br>,33,36   | 11 | P02631,P08649,P35745,P42854,P80202,P85971,P97615,Q05702,Q91XN4,Q99PP0,Q9QZQ5                                                         |
| 6104 | 1,5,34,36,<br>37,38,39,4<br>0 | 2,3,4,6,7,8<br>,33,35   | 12 | O54858,O70417,P02631,P35745,P36860,P42854,P85971,Q4V885,Q5PPH0,Q63149,Q99PP0,Q9QZQ5                                                  |
| 6105 | 1,5,35,36,<br>37,38,39,4<br>0 | 2,3,4,6,7,8<br>,33,34   | 19 | O54858,O55004,P02625,P02631,P08649,P20766,P35745,P42854,P80202,Q05702,Q4V885,Q5IOD7,Q63475,Q64240,Q6AYC4,Q91XN4,Q99PP0,Q9QW30,Q9QZQ5 |
| 6106 | 1,6,7,8,33,<br>34,35,36       | 2,3,4,5,37,<br>38,39,40 | 5  | O89117,P08494,P08649,P08721,Q9QX74                                                                                                   |
| 6107 | 1,6,7,8,33,<br>34,35,37       | 2,3,4,5,36,<br>38,39,40 | 5  | O89117,P08723,P13432,Q9QW07,Q9QX74                                                                                                   |
| 6108 | 1,6,7,8,33,<br>34,35,38       | 2,3,4,5,36,<br>37,39,40 | 3  | iRT-Kit_WR_fusion,O89117,Q9QX74                                                                                                      |
| 6109 | 1,6,7,8,33,<br>34,35,39       | 2,3,4,5,36,<br>37,38,40 | 3  | Q4KLZ6,Q9QX74,Q9Z0V6                                                                                                                 |
| 6110 | 1,6,7,8,33,<br>34,35,40       | 2,3,4,5,36,<br>37,38,39 | 3  | O89117,P13432,P15399                                                                                                                 |
| 6111 | 1,6,7,8,33,<br>34,36,37       | 2,3,4,5,35,<br>38,39,40 | 18 | O89117,P00774,P08494,P08721,P08723,P0C0A9,P13432,P22283,P55091,P70549,P98089,Q62635,Q63617,Q6P6R2,Q9JHB9,Q9JI85,Q9QW07,Q9QX74        |
| 6112 | 1,6,7,8,33,<br>34,36,38       | 2,3,4,5,35,<br>37,39,40 | 5  | iRT-Kit_WR_fusion,P00774,P08494,P08721,Q9QX74                                                                                        |
| 6113 | 1,6,7,8,33,<br>34,36,39       | 2,3,4,5,35,<br>37,38,40 | 5  | P00774,P02651,P08494,P08649,Q9QX74                                                                                                   |
| 6114 | 1,6,7,8,33,<br>34,36,40       | 2,3,4,5,35,<br>37,38,39 | 4  | P08494,P13432,Q9JHB9,Q9QX74                                                                                                          |
| 6115 | 1,6,7,8,33,<br>34,37,38       | 2,3,4,5,35,<br>36,39,40 | 5  | P00774,P08723,P21674,Q9JHB9,Q9QW07                                                                                                   |
| 6116 | 1,6,7,8,33,<br>34,37,39       | 2,3,4,5,35,<br>36,38,40 | 6  | P02793;Q7TP54,P0C0A9,P13432,P21674,Q9QW07,Q9QX74                                                                                     |
| 6117 | 1,6,7,8,33,<br>34,37,40       | 2,3,4,5,35,<br>36,38,39 | 8  | P08723,P13432,P21674,P24368,P30120,Q62714,Q9JHB9,Q9QW07                                                                              |
| 6118 | 1,6,7,8,33,<br>34,38,39       | 2,3,4,5,35,<br>36,37,40 | 3  | P02793;Q7TP54,P19132,P21674                                                                                                          |
| 6119 | 1,6,7,8,33,<br>34,38,40       | 2,3,4,5,35,<br>36,37,39 | 2  | P15399,P21674                                                                                                                        |

|      |                                              |                                                                                                                        |
|------|----------------------------------------------|------------------------------------------------------------------------------------------------------------------------|
| 6120 | 1,6,7,8,33, 2,3,4,5,35,<br>34,39,40 36,37,38 | 3 P13432,P15399,P21674                                                                                                 |
| 6121 | 1,6,7,8,33, 2,3,4,5,34,<br>35,36,37 38,39,40 | 7 P08723,P70549,Q4KLZ6,Q63493,Q63617,Q9JI85,Q9QW07                                                                     |
| 6122 | 1,6,7,8,33, 2,3,4,5,34,<br>35,36,38 37,39,40 | 0                                                                                                                      |
| 6123 | 1,6,7,8,33, 2,3,4,5,34,<br>35,36,39 37,38,40 | 1 Q4KLZ6                                                                                                               |
| 6124 | 1,6,7,8,33, 2,3,4,5,34,<br>35,36,40 37,38,39 | 2 P70549,Q4KLZ6                                                                                                        |
| 6125 | 1,6,7,8,33, 2,3,4,5,34,<br>35,37,38 36,39,40 | 0                                                                                                                      |
| 6126 | 1,6,7,8,33, 2,3,4,5,34,<br>35,37,39 36,38,40 | 3 P21674,P70549,Q4KLZ6                                                                                                 |
| 6127 | 1,6,7,8,33, 2,3,4,5,34,<br>35,37,40 36,38,39 | 4 P30120,P70549,Q4KLZ6,Q9QW07                                                                                          |
| 6128 | 1,6,7,8,33, 2,3,4,5,34,<br>35,38,39 36,37,40 | 1 Q4KLZ6                                                                                                               |
| 6129 | 1,6,7,8,33, 2,3,4,5,34,<br>35,38,40 36,37,39 | 0                                                                                                                      |
| 6130 | 1,6,7,8,33, 2,3,4,5,34,<br>35,39,40 36,37,38 | 3 P21674,P29315,Q4KLZ6                                                                                                 |
| 6131 | 1,6,7,8,33, 2,3,4,5,34,<br>36,37,38 35,39,40 | 6 P00774,P06911,P08723,P12020,P70549,Q63474                                                                            |
| 6132 | 1,6,7,8,33, 2,3,4,5,34,<br>36,37,39 35,38,40 | 9 P00774,P06911,P08723,P0C0A9,P21674,P70549,Q4KLZ6,Q6AYR9,Q812E4                                                       |
| 6133 | 1,6,7,8,33, 2,3,4,5,34,<br>36,37,40 35,38,39 | 16 O08815,P02782,P06911,P08723,P09456,P12020,P13432,P19629,P21674,P30120,P47727,P7054<br>9,Q5GRG2,Q6AYR9,Q812E4,Q9QW07 |
| 6134 | 1,6,7,8,33, 2,3,4,5,34,<br>36,38,39 35,37,40 | 0                                                                                                                      |
| 6135 | 1,6,7,8,33, 2,3,4,5,34,<br>36,38,40 35,37,39 | 1 P06911                                                                                                               |
| 6136 | 1,6,7,8,33, 2,3,4,5,34,<br>36,39,40 35,37,38 | 2 P21674,Q4KLZ6                                                                                                        |
| 6137 | 1,6,7,8,33, 2,3,4,5,34,<br>37,38,39 35,36,40 | 1 P21674                                                                                                               |
| 6138 | 1,6,7,8,33, 2,3,4,5,34,<br>37,38,40 35,36,39 | 7 P06911,P12020,P21674,P30120,Q5GRG2,Q62714,Q9QW07                                                                     |
| 6139 | 1,6,7,8,33, 2,3,4,5,34,<br>37,39,40 35,36,38 | 9 P13432,P21674,P30120,P70549,Q4KLZ6,Q5GRG2,Q812E4,Q9QW07,Q9QWN8                                                       |

|      |                                              |    |                                                                                                                            |
|------|----------------------------------------------|----|----------------------------------------------------------------------------------------------------------------------------|
| 6140 | 1,6,7,8,33, 2,3,4,5,34,<br>38,39,40 35,36,37 | 5  | P21674,P25031,P51740,P55091,Q5I0D7                                                                                         |
| 6141 | 1,6,7,8,34, 2,3,4,5,33,<br>35,36,37 38,39,40 | 8  | P01039,P13432,P22283,P35745,P55091,P70549,Q63617,Q9JI85                                                                    |
| 6142 | 1,6,7,8,34, 2,3,4,5,33,<br>35,36,38 37,39,40 | 1  | P35745                                                                                                                     |
| 6143 | 1,6,7,8,34, 2,3,4,5,33,<br>35,36,39 37,38,40 | 2  | P35745,Q9Z1F2                                                                                                              |
| 6144 | 1,6,7,8,34, 2,3,4,5,33,<br>35,36,40 37,38,39 | 2  | P13432,P35745                                                                                                              |
| 6145 | 1,6,7,8,34, 2,3,4,5,33,<br>35,37,38 36,39,40 | 1  | P35745                                                                                                                     |
| 6146 | 1,6,7,8,34, 2,3,4,5,33,<br>35,37,39 36,38,40 | 2  | P35745,Q9Z0V6                                                                                                              |
| 6147 | 1,6,7,8,34, 2,3,4,5,33,<br>35,37,40 36,38,39 | 5  | P13432,P15399,P35745,Q99041,Q9QW07                                                                                         |
| 6148 | 1,6,7,8,34, 2,3,4,5,33,<br>35,38,39 36,37,40 | 2  | P35745,Q9Z0V6                                                                                                              |
| 6149 | 1,6,7,8,34, 2,3,4,5,33,<br>35,38,40 36,37,39 | 3  | P15399,P35745,P97580                                                                                                       |
| 6150 | 1,6,7,8,34, 2,3,4,5,33,<br>35,39,40 36,37,38 | 2  | P15399,P35745                                                                                                              |
| 6151 | 1,6,7,8,34, 2,3,4,5,33,<br>36,37,38 35,39,40 | 6  | P00774,P06911,P12020,P35745,Q63474,Q9JI85                                                                                  |
| 6152 | 1,6,7,8,34, 2,3,4,5,33,<br>36,37,39 35,38,40 | 11 | P01039,P06911,P12020,P13432,P22283,P35745,P70549,Q6AYR9,Q6P6R2,Q812E4,Q9JI85                                               |
| 6153 | 1,6,7,8,34, 2,3,4,5,33,<br>36,37,40 35,38,39 | 17 | P02782,P06911,P09456,P12020,P13432,P19629,P22283,P30120,P35745,P47727,P49134,P70549<br>,Q5GRG2,Q6AYR9,Q812E4,Q9JI85,Q9QW07 |
| 6154 | 1,6,7,8,34, 2,3,4,5,33,<br>36,38,39 35,37,40 | 1  | P35745                                                                                                                     |
| 6155 | 1,6,7,8,34, 2,3,4,5,33,<br>36,38,40 35,37,39 | 2  | P12020,P15399                                                                                                              |
| 6156 | 1,6,7,8,34, 2,3,4,5,33,<br>36,39,40 35,37,38 | 3  | P13432,P15399,P35745                                                                                                       |
| 6157 | 1,6,7,8,34, 2,3,4,5,33,<br>37,38,39 35,36,40 | 3  | P21674,P35745,P49134                                                                                                       |
| 6158 | 1,6,7,8,34, 2,3,4,5,33,<br>37,38,40 35,36,39 | 11 | P01835,P12020,P13432,P15399,P21674,P30120,P35745,P49134,Q5GRG2,Q62714,Q9QW07                                               |
| 6159 | 1,6,7,8,34, 2,3,4,5,33,<br>37,39,40 35,36,38 | 8  | P13432,P15399,P19629,P21674,P35745,P49134,Q812E4,Q9QW07                                                                    |

|      |                                              |    |                                                                                                                        |
|------|----------------------------------------------|----|------------------------------------------------------------------------------------------------------------------------|
| 6160 | 1,6,7,8,34, 2,3,4,5,33,<br>38,39,40 35,36,37 | 5  | P15399,P21674,P35745,P51740,P97580                                                                                     |
| 6161 | 1,6,7,8,35, 2,3,4,5,33,<br>36,37,38 34,39,40 | 3  | P19218,P35745,P70549                                                                                                   |
| 6162 | 1,6,7,8,35, 2,3,4,5,33,<br>36,37,39 34,38,40 | 7  | P01039,P35745,P70549,P97829,Q4KLZ6,Q6AYR9,Q812E4                                                                       |
| 6163 | 1,6,7,8,35, 2,3,4,5,33,<br>36,37,40 34,38,39 | 12 | P06911,P13432,P19132,P19629,P35745,P60905,P70549,Q5GRG2,Q6AYR9,Q99041,Q9QW07,Q9WUC4                                    |
| 6164 | 1,6,7,8,35, 2,3,4,5,33,<br>36,38,39 34,37,40 | 1  | P35745                                                                                                                 |
| 6165 | 1,6,7,8,35, 2,3,4,5,33,<br>36,38,40 34,37,39 | 1  | P35745                                                                                                                 |
| 6166 | 1,6,7,8,35, 2,3,4,5,33,<br>36,39,40 34,37,38 | 3  | P35745,P70549,Q4KLZ6                                                                                                   |
| 6167 | 1,6,7,8,35, 2,3,4,5,33,<br>37,38,39 34,36,40 | 1  | P35745                                                                                                                 |
| 6168 | 1,6,7,8,35, 2,3,4,5,33,<br>37,38,40 34,36,39 | 4  | P35745,Q5GRG2,Q99041,Q9QW07                                                                                            |
| 6169 | 1,6,7,8,35, 2,3,4,5,33,<br>37,39,40 34,36,38 | 8  | P21674,P35745,P70549,P80299,Q4KLZ6,Q99041,Q9QW07,Q9WUC4                                                                |
| 6170 | 1,6,7,8,35, 2,3,4,5,33,<br>38,39,40 34,36,37 | 6  | P35745,P51740,P55091,P98089,Q5I0D7,Q62635                                                                              |
| 6171 | 1,6,7,8,36, 2,3,4,5,33,<br>37,38,39 34,35,40 | 8  | P06911,P12020,P19629,P35745,P70549,Q5GRG2,Q63474,Q812E4                                                                |
| 6172 | 1,6,7,8,36, 2,3,4,5,33,<br>37,38,40 34,35,39 | 12 | P06911,P09456,P12020,P19629,P30120,P35745,P70549,Q5GRG2,Q63474,Q9QW07,Q9WUC4,Q9Z2L0                                    |
| 6173 | 1,6,7,8,36, 2,3,4,5,33,<br>37,39,40 34,35,38 | 17 | O35547,P02782,P06911,P12020,P13432,P19629,P21674,P35745,P70549,P97829,Q5GRG2,Q63474,Q6AYR9,Q812E4,Q9QW07,Q9WUC4,Q9Z2L0 |
| 6174 | 1,6,7,8,36, 2,3,4,5,33,<br>38,39,40 34,35,37 | 7  | P06911,P12020,P35745,P51740,P80020,Q5GRG2,Q5I0D7                                                                       |
| 6175 | 1,6,7,8,37, 2,3,4,5,33,<br>38,39,40 34,35,36 | 14 | D3ZUC6,P01835,P06911,P12020,P19629,P21674,P35745,P49134,P51740,Q5GRG2,Q5I0D7,Q5QE79,Q9QW07,Q9WUC4                      |
| 6176 | 1,6,7,33,3 2,3,4,5,8,3<br>4,35,36,37 8,39,40 | 12 | D4A5U3,O89117,P08494,P08721,P08723,P36376,P70549,Q5BJY9,Q62635,Q6PCU2,Q8CIZ5,Q9R168                                    |
| 6177 | 1,6,7,33,3 2,3,4,5,8,3<br>4,35,36,38 7,39,40 | 4  | P08494,P08721,P36376,Q9R168                                                                                            |
| 6178 | 1,6,7,33,3 2,3,4,5,8,3<br>4,35,36,39 7,38,40 | 3  | P08494,P08721,P22006                                                                                                   |
| 6179 | 1,6,7,33,3 2,3,4,5,8,3<br>4,35,36,40 7,38,39 | 5  | P08494,P08721,P36376,Q6PCU2,Q9EQS0                                                                                     |

|      |                                              |                                                                          |
|------|----------------------------------------------|--------------------------------------------------------------------------|
| 6180 | 1,6,7,33,3 2,3,4,5,8,3<br>4,35,37,38 6,39,40 | 3 P36376,Q5BJY9,Q9R168                                                   |
| 6181 | 1,6,7,33,3 2,3,4,5,8,3<br>4,35,37,39 6,38,40 | 0                                                                        |
| 6182 | 1,6,7,33,3 2,3,4,5,8,3<br>4,35,37,40 6,38,39 | 3 P36376,Q5BJY9,Q9QW07                                                   |
| 6183 | 1,6,7,33,3 2,3,4,5,8,3<br>4,35,38,39 6,37,40 | 0                                                                        |
| 6184 | 1,6,7,33,3 2,3,4,5,8,3<br>4,35,38,40 6,37,39 | 3 P36376,P63029,Q9R168                                                   |
| 6185 | 1,6,7,33,3 2,3,4,5,8,3<br>4,35,39,40 6,37,38 | 0                                                                        |
| 6186 | 1,6,7,33,3 2,3,4,5,8,3<br>4,36,37,38 5,39,40 | 7 P00774,P08721,P08723,P36376,P36860,Q63474,Q9R168                       |
| 6187 | 1,6,7,33,3 2,3,4,5,8,3<br>4,36,37,39 5,38,40 | 9 P00774,P08494,P08723,P21674,P22283,P36374,P36376,P70549,Q62635         |
| 6188 | 1,6,7,33,3 2,3,4,5,8,3<br>4,36,37,40 5,38,39 | 9 P08494,P08723,P19629,P20762,P24368,P36376,P70549,Q78P75,Q9QW07         |
| 6189 | 1,6,7,33,3 2,3,4,5,8,3<br>4,36,38,39 5,37,40 | 4 P00774,P08494,P36860,P82471                                            |
| 6190 | 1,6,7,33,3 2,3,4,5,8,3<br>4,36,38,40 5,37,39 | 3 P08494,P36376,P36860                                                   |
| 6191 | 1,6,7,33,3 2,3,4,5,8,3<br>4,36,39,40 5,37,38 | 3 P08494,P36860,Q6DGG1                                                   |
| 6192 | 1,6,7,33,3 2,3,4,5,8,3<br>4,37,38,39 5,36,40 | 2 P02793;Q7TP54,P21674                                                   |
| 6193 | 1,6,7,33,3 2,3,4,5,8,3<br>4,37,38,40 5,36,39 | 4 P21674,P36376,Q62714,Q9QW07                                            |
| 6194 | 1,6,7,33,3 2,3,4,5,8,3<br>4,37,39,40 5,36,38 | 4 P19218,P21674,P24368,Q9QW07                                            |
| 6195 | 1,6,7,33,3 2,3,4,5,8,3<br>4,38,39,40 5,36,37 | 6 F1M3L7,P19132,P21674,P51740,P55091,Q6DGG1                              |
| 6196 | 1,6,7,33,3 2,3,4,5,8,3<br>5,36,37,38 4,39,40 | 4 P08723,P20762,P36376,P70549                                            |
| 6197 | 1,6,7,33,3 2,3,4,5,8,3<br>5,36,37,39 4,38,40 | 2 P70549,Q4KLZ6                                                          |
| 6198 | 1,6,7,33,3 2,3,4,5,8,3<br>5,36,37,40 4,38,39 | 10 D4A5U3,P05539,P08723,P12368,P20762,P36376,P60905,P70549,Q9EQS0,Q9QW07 |
| 6199 | 1,6,7,33,3 2,3,4,5,8,3<br>5,36,38,39 4,37,40 | 0                                                                        |

|      |                                              |                                                           |
|------|----------------------------------------------|-----------------------------------------------------------|
| 6200 | 1,6,7,33,3 2,3,4,5,8,3<br>5,36,38,40 4,37,39 | 4 P05539,P20762,P36376,P63029                             |
| 6201 | 1,6,7,33,3 2,3,4,5,8,3<br>5,36,39,40 4,37,38 | 4 P05539,P70549,Q4KLZ6,Q9EQS0                             |
| 6202 | 1,6,7,33,3 2,3,4,5,8,3<br>5,37,38,39 4,36,40 | 0                                                         |
| 6203 | 1,6,7,33,3 2,3,4,5,8,3<br>5,37,38,40 4,36,39 | 5 P05539,P20762,P36376,P70549,Q8K4G9                      |
| 6204 | 1,6,7,33,3 2,3,4,5,8,3<br>5,37,39,40 4,36,38 | 6 P02625,P05539,P21674,P70549,Q4KLZ6,Q9QW07               |
| 6205 | 1,6,7,33,3 2,3,4,5,8,3<br>5,38,39,40 4,36,37 | 3 P05539,P51740,P55091                                    |
| 6206 | 1,6,7,33,3 2,3,4,5,8,3<br>6,37,38,39 4,35,40 | 5 P00774,P36376,P36860,P70549,Q63474                      |
| 6207 | 1,6,7,33,3 2,3,4,5,8,3<br>6,37,38,40 4,35,39 | 8 P08723,P19629,P20762,P36376,P36860,P70549,Q5GRG2,Q63474 |
| 6208 | 1,6,7,33,3 2,3,4,5,8,3<br>6,37,39,40 4,35,38 | 7 O35547,P19629,P21674,P25809,P36860,P70549,Q9QW07        |
| 6209 | 1,6,7,33,3 2,3,4,5,8,3<br>6,38,39,40 4,35,37 | 3 P05539,P36860,P51740                                    |
| 6210 | 1,6,7,33,3 2,3,4,5,8,3<br>7,38,39,40 4,35,36 | 5 P19629,P21674,P36860,P51740,Q5I0D7                      |
| 6211 | 1,6,7,34,3 2,3,4,5,8,3<br>5,36,37,38 3,39,40 | 4 P35745,P36376,P70549,Q9R168                             |
| 6212 | 1,6,7,34,3 2,3,4,5,8,3<br>5,36,37,39 3,38,40 | 2 P35745,P70549                                           |
| 6213 | 1,6,7,34,3 2,3,4,5,8,3<br>5,36,37,40 3,38,39 | 3 P36376,P70549,Q9QW07                                    |
| 6214 | 1,6,7,34,3 2,3,4,5,8,3<br>5,36,38,39 3,37,40 | 1 P35745                                                  |
| 6215 | 1,6,7,34,3 2,3,4,5,8,3<br>5,36,38,40 3,37,39 | 1 P36376                                                  |
| 6216 | 1,6,7,34,3 2,3,4,5,8,3<br>5,36,39,40 3,37,38 | 0                                                         |
| 6217 | 1,6,7,34,3 2,3,4,5,8,3<br>5,37,38,39 3,36,40 | 1 P35745                                                  |
| 6218 | 1,6,7,34,3 2,3,4,5,8,3<br>5,37,38,40 3,36,39 | 2 P35745,P36376                                           |
| 6219 | 1,6,7,34,3 2,3,4,5,8,3<br>5,37,39,40 3,36,38 | 2 P35745,P70549                                           |

|      |                                              |    |                                                                                     |
|------|----------------------------------------------|----|-------------------------------------------------------------------------------------|
| 6220 | 1,6,7,34,3 2,3,4,5,8,3<br>5,38,39,40 3,36,37 | 3  | P35745,P51740,P55091                                                                |
| 6221 | 1,6,7,34,3 2,3,4,5,8,3<br>6,37,38,39 3,35,40 | 4  | P01835,P35745,P36376,Q63474                                                         |
| 6222 | 1,6,7,34,3 2,3,4,5,8,3<br>6,37,38,40 3,35,39 | 5  | P01835,P19629,P36376,P70549,Q63474                                                  |
| 6223 | 1,6,7,34,3 2,3,4,5,8,3<br>6,37,39,40 3,35,38 | 6  | P01835,P19629,P21674,P22283,P35745,P70549                                           |
| 6224 | 1,6,7,34,3 2,3,4,5,8,3<br>6,38,39,40 3,35,37 | 2  | P36860,P51740                                                                       |
| 6225 | 1,6,7,34,3 2,3,4,5,8,3<br>7,38,39,40 3,35,36 | 6  | P01835,P19629,P21674,P35745,P49134,P51740                                           |
| 6226 | 1,6,7,35,3 2,3,4,5,8,3<br>6,37,38,39 3,34,40 | 4  | P00762,P35745,P70549,Q63475                                                         |
| 6227 | 1,6,7,35,3 2,3,4,5,8,3<br>6,37,38,40 3,34,39 | 7  | D3ZTE0,P19629,P20762,P35745,P36376,P70549,Q9WUC4                                    |
| 6228 | 1,6,7,35,3 2,3,4,5,8,3<br>6,37,39,40 3,34,38 | 8  | O35547,P00762,P02625,P19629,P35745,P70549,Q63475,Q9WUC4                             |
| 6229 | 1,6,7,35,3 2,3,4,5,8,3<br>6,38,39,40 3,34,37 | 3  | P35745,P51740,P70549                                                                |
| 6230 | 1,6,7,35,3 2,3,4,5,8,3<br>7,38,39,40 3,34,36 | 8  | P00762,P02625,P26772,P35745,P51740,P70549,Q5I0D7,Q9WUC4                             |
| 6231 | 1,6,7,36,3 2,3,4,5,8,3<br>7,38,39,40 3,34,35 | 12 | P00762,P01835,P19629,P35745,P36860,P51740,P70549,Q5GRG2,Q5I0D7,Q63474,Q63475,Q9WUC4 |
| 6232 | 1,6,8,33,3 2,3,4,5,7,3<br>4,35,36,37 8,39,40 | 8  | O89117,P08494,P08723,P13432,P70549,Q5QE79,Q6PCU2,Q9JI85                             |
| 6233 | 1,6,8,33,3 2,3,4,5,7,3<br>4,35,36,38 7,39,40 | 2  | O89117,P08494                                                                       |
| 6234 | 1,6,8,33,3 2,3,4,5,7,3<br>4,35,36,39 7,38,40 | 6  | O89117,P08494,P08649,P22006,Q6AY61,Q9QX74                                           |
| 6235 | 1,6,8,33,3 2,3,4,5,7,3<br>4,35,36,40 7,38,39 | 5  | O89117,P08494,P13432,P15399,Q6AY61                                                  |
| 6236 | 1,6,8,33,3 2,3,4,5,7,3<br>4,35,37,38 6,39,40 | 1  | O89117                                                                              |
| 6237 | 1,6,8,33,3 2,3,4,5,7,3<br>4,35,37,39 6,38,40 | 2  | P13432,Q9QWN8                                                                       |
| 6238 | 1,6,8,33,3 2,3,4,5,7,3<br>4,35,37,40 6,38,39 | 7  | O89117,P13432,P15399,P24368,P70549,Q9QW07,Q9QWN8                                    |
| 6239 | 1,6,8,33,3 2,3,4,5,7,3<br>4,35,38,39 6,37,40 | 2  | P19132,P97840                                                                       |



|      |                                              |    |                                                                                                       |
|------|----------------------------------------------|----|-------------------------------------------------------------------------------------------------------|
| 6240 | 1,6,8,33,3 2,3,4,5,7,3<br>4,35,38,40 6,37,39 | 4  | O89117,P15399,P63029,P97580                                                                           |
| 6241 | 1,6,8,33,3 2,3,4,5,7,3<br>4,35,39,40 6,37,38 | 4  | P13432,P15399,P47967,P97840                                                                           |
| 6242 | 1,6,8,33,3 2,3,4,5,7,3<br>4,36,37,38 5,39,40 | 5  | O89117,P00774,P08723,P13432,Q63474                                                                    |
| 6243 | 1,6,8,33,3 2,3,4,5,7,3<br>4,36,37,39 5,38,40 | 10 | P00774,P08494,P08649,P08723,P13432,P21674,P36374,P70549,Q6P6R2,Q9QWN8                                 |
| 6244 | 1,6,8,33,3 2,3,4,5,7,3<br>4,36,37,40 5,38,39 | 14 | P02782,P08494,P08723,P13432,P19629,P24368,P30120,P36374,P47727,P70549,Q63474,Q6AYR<br>9,Q9JI85,Q9QW07 |
| 6245 | 1,6,8,33,3 2,3,4,5,7,3<br>4,36,38,39 5,37,40 | 2  | P08494,P19132                                                                                         |
| 6246 | 1,6,8,33,3 2,3,4,5,7,3<br>4,36,38,40 5,37,39 | 5  | P08494,P13432,P15399,P63029,Q63474                                                                    |
| 6247 | 1,6,8,33,3 2,3,4,5,7,3<br>4,36,39,40 5,37,38 | 4  | P08494,P08649,P13432,P15399                                                                           |
| 6248 | 1,6,8,33,3 2,3,4,5,7,3<br>4,37,38,39 5,36,40 | 4  | P02793;Q7TP54,P19132,P21674,Q9QWN8                                                                    |
| 6249 | 1,6,8,33,3 2,3,4,5,7,3<br>4,37,38,40 5,36,39 | 7  | P13432,P15399,P21674,P30120,Q62714,Q9QW07,Q9QWN8                                                      |
| 6250 | 1,6,8,33,3 2,3,4,5,7,3<br>4,37,39,40 5,36,38 | 8  | P13432,P15399,P21674,P24368,P47967,P97840,Q9QW07,Q9QWN8                                               |
| 6251 | 1,6,8,33,3 2,3,4,5,7,3<br>4,38,39,40 5,36,37 | 10 | P15399,P19132,P21674,P25031,P47967,P51740,P55091,P97580,P97840,Q5I0D1                                 |
| 6252 | 1,6,8,33,3 2,3,4,5,7,3<br>5,36,37,38 4,39,40 | 5  | P08723,P20766,P70549,Q63474,Q68G31                                                                    |
| 6253 | 1,6,8,33,3 2,3,4,5,7,3<br>5,36,37,39 4,38,40 | 4  | P08723,P70549,Q4KLZ6,Q6AY61                                                                           |
| 6254 | 1,6,8,33,3 2,3,4,5,7,3<br>5,36,37,40 4,38,39 | 12 | O08815,P08723,P12368,P13432,P19629,P20766,P30120,P60905,P70549,P70712,Q6AYR9,Q9Q<br>W07               |
| 6255 | 1,6,8,33,3 2,3,4,5,7,3<br>5,36,38,39 4,37,40 | 1  | Q6AY61                                                                                                |
| 6256 | 1,6,8,33,3 2,3,4,5,7,3<br>5,36,38,40 4,37,39 | 3  | P63029,P70549,Q6AY61                                                                                  |
| 6257 | 1,6,8,33,3 2,3,4,5,7,3<br>5,36,39,40 4,37,38 | 3  | P70549,Q4KLZ6,Q6AY61                                                                                  |
| 6258 | 1,6,8,33,3 2,3,4,5,7,3<br>5,37,38,39 4,36,40 | 2  | Q68G31,Q9QWN8                                                                                         |
| 6259 | 1,6,8,33,3 2,3,4,5,7,3<br>5,37,38,40 4,36,39 | 6  | P20766,P70549,Q68G31,Q8K4G9,Q9QW07,Q9Z1F2                                                             |

|      |                                              |    |                                                                                                                 |
|------|----------------------------------------------|----|-----------------------------------------------------------------------------------------------------------------|
| 6260 | 1,6,8,33,3 2,3,4,5,7,3<br>5,37,39,40 4,36,38 | 8  | P13432,P21674,P47967,P70549,Q4KLZ6,Q68G31,Q9QW07,Q9QWN8                                                         |
| 6261 | 1,6,8,33,3 2,3,4,5,7,3<br>5,38,39,40 4,36,37 | 7  | P47967,P51740,P55091,P97840,Q5I0D1,Q5I0D7,Q68G31                                                                |
| 6262 | 1,6,8,33,3 2,3,4,5,7,3<br>6,37,38,39 4,35,40 | 5  | P06911,P08723,P70549,Q63474,Q68G31                                                                              |
| 6263 | 1,6,8,33,3 2,3,4,5,7,3<br>6,37,38,40 4,35,39 | 11 | P06911,P08723,P12020,P13432,P19629,P20766,P30120,P70549,Q5GRG2,Q63474,Q9QW07                                    |
| 6264 | 1,6,8,33,3 2,3,4,5,7,3<br>6,37,39,40 4,35,38 | 16 | O35547,P02782,P06911,P08723,P13432,P19629,P21674,P30120,P36374,P70549,Q5GRG2,Q63474,Q6AYR9,Q812E4,Q9QW07,Q9QWN8 |
| 6265 | 1,6,8,33,3 2,3,4,5,7,3<br>6,38,39,40 4,35,37 | 4  | P47967,P51740,P97840,Q63474                                                                                     |
| 6266 | 1,6,8,33,3 2,3,4,5,7,3<br>7,38,39,40 4,35,36 | 12 | P19629,P21674,P47967,P51740,P70549,P97840,Q5GRG2,Q5I0D7,Q63474,Q68G31,Q9QW07,Q9QWN8                             |
| 6267 | 1,6,8,34,3 2,3,4,5,7,3<br>5,36,37,38 3,39,40 | 5  | P35745,P70549,Q5RKI1,Q63474,Q9JI85                                                                              |
| 6268 | 1,6,8,34,3 2,3,4,5,7,3<br>5,36,37,39 3,38,40 | 5  | P01039,P13432,P35745,P50116,P70549                                                                              |
| 6269 | 1,6,8,34,3 2,3,4,5,7,3<br>5,36,37,40 3,38,39 | 10 | P13432,P15399,P19629,P35745,P60905,P70549,Q5RKI1,Q63556,Q9JI85,Q9QW07                                           |
| 6270 | 1,6,8,34,3 2,3,4,5,7,3<br>5,36,38,39 3,37,40 | 1  | P35745                                                                                                          |
| 6271 | 1,6,8,34,3 2,3,4,5,7,3<br>5,36,38,40 3,37,39 | 3  | P15399,Q5RKI1,Q6AYQ8                                                                                            |
| 6272 | 1,6,8,34,3 2,3,4,5,7,3<br>5,36,39,40 3,37,38 | 4  | P13432,P15399,P70549,Q6AY61                                                                                     |
| 6273 | 1,6,8,34,3 2,3,4,5,7,3<br>5,37,38,39 3,36,40 | 1  | P35745                                                                                                          |
| 6274 | 1,6,8,34,3 2,3,4,5,7,3<br>5,37,38,40 3,36,39 | 5  | P13432,P15399,P35745,Q5RKI1,Q9QW07                                                                              |
| 6275 | 1,6,8,34,3 2,3,4,5,7,3<br>5,37,39,40 3,36,38 | 6  | P13432,P15399,P35745,P70549,Q923V8,Q9QW07                                                                       |
| 6276 | 1,6,8,34,3 2,3,4,5,7,3<br>5,38,39,40 3,36,37 | 8  | P15399,P35745,P47967,P51740,P55091,P97580,P97840,Q30KJ2                                                         |
| 6277 | 1,6,8,34,3 2,3,4,5,7,3<br>6,37,38,39 3,35,40 | 5  | P12020,P19629,P35745,P70549,Q63474                                                                              |
| 6278 | 1,6,8,34,3 2,3,4,5,7,3<br>6,37,38,40 3,35,39 | 12 | P06911,P12020,P13432,P15399,P19629,P30120,P35745,P70549,Q5GRG2,Q5RKI1,Q63474,Q9QW07                             |
| 6279 | 1,6,8,34,3 2,3,4,5,7,3<br>6,37,39,40 3,35,38 | 13 | P06911,P12020,P13432,P15399,P19629,P21674,P35745,P70549,Q5GRG2,Q63474,Q6AYR9,Q812E4,Q9QW07                      |

|      |                               |                        |    |                                                                                                   |
|------|-------------------------------|------------------------|----|---------------------------------------------------------------------------------------------------|
| 6280 | 1,6,8,34,3<br>6,38,39,40      | 2,3,4,5,7,3<br>3,35,37 | 7  | P13432,P15399,P47967,P51740,P97580,P97840,Q63474                                                  |
| 6281 | 1,6,8,34,3<br>7,38,39,40      | 2,3,4,5,7,3<br>3,35,36 | 14 | P12020,P13432,P15399,P19629,P21674,P35745,P47967,P49134,P51740,P97580,P97840,Q5GRG2,Q5I0D7,Q63474 |
| 6282 | 1,6,8,35,3<br>6,37,38,39      | 2,3,4,5,7,3<br>3,34,40 | 3  | P35745,P70549,Q63474                                                                              |
| 6283 | 1,6,8,35,3<br>6,37,38,40      | 2,3,4,5,7,3<br>3,34,39 | 10 | P06911,P19629,P35745,P60905,P70549,P70712,Q5GRG2,Q5RKI1,Q63474,Q6AYQ8                             |
| 6284 | 1,6,8,35,3<br>6,37,39,40      | 2,3,4,5,7,3<br>3,34,38 | 12 | O35547,P13432,P19629,P35745,P50116,P60905,P70549,P70712,P80299,Q6AYR9,Q6P6S4,Q812E4               |
| 6285 | 1,6,8,35,3<br>6,38,39,40      | 2,3,4,5,7,3<br>3,34,37 | 7  | P35745,P47967,P51740,P54921,P70549,Q5I0D7,Q6AY61                                                  |
| 6286 | 1,6,8,35,3<br>7,38,39,40      | 2,3,4,5,7,3<br>3,34,36 | 9  | P19629,P26772,P35745,P47967,P51740,P70549,P97840,Q5GRG2,Q5I0D7                                    |
| 6287 | 1,6,8,36,3<br>7,38,39,40      | 2,3,4,5,7,3<br>3,34,35 | 10 | P06911,P12020,P19629,P35745,P51740,P70549,Q5GRG2,Q5I0D7,Q63474,Q812E4                             |
| 6288 | 1,6,33,34,<br>35,36,37,3<br>8 | 2,3,4,5,7,8<br>,39,40  | 6  | D3ZUC6,O89117,P20762,P36374,P36376,P70549                                                         |
| 6289 | 1,6,33,34,<br>35,36,37,3<br>9 | 2,3,4,5,7,8<br>,38,40  | 6  | P08494,P22006,P35280,P36374,P70549,Q6PCU2                                                         |
| 6290 | 1,6,33,34,<br>35,36,37,4<br>0 | 2,3,4,5,7,8<br>,38,39  | 12 | D4A5U3,P08494,P11883,P20762,P35280,P36374,P36376,P60905,P70549,Q4G075,Q6PCU2,Q9EQS0               |
| 6291 | 1,6,33,34,<br>35,36,38,3<br>9 | 2,3,4,5,7,8<br>,37,40  | 3  | D3ZUC6,P08494,P22006                                                                              |
| 6292 | 1,6,33,34,<br>35,36,38,4<br>0 | 2,3,4,5,7,8<br>,37,39  | 5  | D3ZUC6,P08494,P20762,P36376,P63029                                                                |
| 6293 | 1,6,33,34,<br>35,36,39,4<br>0 | 2,3,4,5,7,8<br>,37,38  | 6  | P08494,P22006,P35280,P70549,Q6DGG1,Q9EQS0                                                         |
| 6294 | 1,6,33,34,<br>35,37,38,3<br>9 | 2,3,4,5,7,8<br>,36,40  | 0  |                                                                                                   |
| 6295 | 1,6,33,34,<br>35,37,38,4<br>0 | 2,3,4,5,7,8<br>,36,39  | 4  | P20762,P36376,P63029,Q9Z1F2                                                                       |

|      |                               |                       |    |                                                                                                       |
|------|-------------------------------|-----------------------|----|-------------------------------------------------------------------------------------------------------|
| 6296 | 1,6,33,34,<br>35,37,39,4<br>0 | 2,3,4,5,7,8<br>,36,38 | 4  | B1H234,P19218,P35280,P70549                                                                           |
| 6297 | 1,6,33,34,<br>35,38,39,4<br>0 | 2,3,4,5,7,8<br>,36,37 | 7  | P47967,P51740,P55091,P63029,P97840,Q5I0D1,Q6AYR8                                                      |
| 6298 | 1,6,33,34,<br>36,37,38,3<br>9 | 2,3,4,5,7,8<br>,35,40 | 5  | P00774,P36374,P36860,P70549,Q63474                                                                    |
| 6299 | 1,6,33,34,<br>36,37,38,4<br>0 | 2,3,4,5,7,8<br>,35,39 | 8  | P19629,P20762,P36374,P36376,P36860,P63029,P70549,Q63474                                               |
| 6300 | 1,6,33,34,<br>36,37,39,4<br>0 | 2,3,4,5,7,8<br>,35,38 | 11 | O70417,P19218,P19629,P21674,P24368,P35280,P36374,P36860,P70549,Q6DGG1,Q78P75                          |
| 6301 | 1,6,33,34,<br>36,38,39,4<br>0 | 2,3,4,5,7,8<br>,35,37 | 5  | P08494,P19132,P36860,P51740,Q6DGG1                                                                    |
| 6302 | 1,6,33,34,<br>37,38,39,4<br>0 | 2,3,4,5,7,8<br>,35,36 | 8  | P19218,P21674,P36860,P47967,P51740,P97840,Q5I0D1,Q6DGG1                                               |
| 6303 | 1,6,33,35,<br>36,37,38,3<br>9 | 2,3,4,5,7,8<br>,34,40 | 6  | P20762,P20766,P36374,P70549,Q63474,Q68G31                                                             |
| 6304 | 1,6,33,35,<br>36,37,38,4<br>0 | 2,3,4,5,7,8<br>,34,39 | 14 | P19629,P20762,P20766,P36374,P36376,P36860,P60905,P63029,P70549,Q63474,Q68G31,Q8K4<br>G9,Q9Z0V6,Q9Z1F2 |
| 6305 | 1,6,33,35,<br>36,37,39,4<br>0 | 2,3,4,5,7,8<br>,34,38 | 10 | B1H234,O35547,P19629,P20762,P20766,P35280,P36374,P60905,P70549,Q9EQS0                                 |
| 6306 | 1,6,33,35,<br>36,38,39,4<br>0 | 2,3,4,5,7,8<br>,34,37 | 9  | B1H234,P06760,P20762,P36860,P47967,P51740,P70549,Q68G31,Q6AYR8                                        |
| 6307 | 1,6,33,35,<br>37,38,39,4<br>0 | 2,3,4,5,7,8<br>,34,36 | 11 | B1H234,P20762,P20766,P47967,P51740,P70549,P97840,Q5I0D7,Q68G31,Q8K4G9,Q9Z1F2                          |
| 6308 | 1,6,33,36,<br>37,38,39,4<br>0 | 2,3,4,5,7,8<br>,34,35 | 11 | P19629,P20762,P20766,P36374,P36860,P51740,P70549,Q5GRG2,Q5I0D7,Q63474,Q68G31                          |

|      |                               |                        |                                                                  |
|------|-------------------------------|------------------------|------------------------------------------------------------------|
| 6309 | 1,6,34,35,<br>36,37,38,3<br>9 | 2,3,4,5,7,8<br>,33,40  | 3 P35745,P70549,Q63474                                           |
| 6310 | 1,6,34,35,<br>36,37,38,4<br>0 | 2,3,4,5,7,8<br>,33,39  | 9 D3ZTE0,P00758,P19629,P20762,P36376,P70549,Q5RKI1,Q63474,Q6AYQ8 |
| 6311 | 1,6,34,35,<br>36,37,39,4<br>0 | 2,3,4,5,7,8<br>,33,38  | 6 B1H234,O70417,P19629,P35280,P50115,P70549                      |
| 6312 | 1,6,34,35,<br>36,38,39,4<br>0 | 2,3,4,5,7,8<br>,33,37  | 2 P51740,Q6AYR8                                                  |
| 6313 | 1,6,34,35,<br>37,38,39,4<br>0 | 2,3,4,5,7,8<br>,33,36  | 5 B1H234,P35745,P47967,P51740,P97840                             |
| 6314 | 1,6,34,36,<br>37,38,39,4<br>0 | 2,3,4,5,7,8<br>,33,35  | 6 P00758,P19629,P36860,P51740,P70549,Q63474                      |
| 6315 | 1,6,35,36,<br>37,38,39,4<br>0 | 2,3,4,5,7,8<br>,33,34  | 8 B1H234,P19629,P35745,P51740,P70549,Q5I0D7,Q63474,Q63475        |
| 6316 | 1,7,8,33,3<br>4,35,36,37      | 2,3,4,5,6,3<br>8,39,40 | 7 P08723,P13432,P51740,P55091,Q6P6R2,Q9ES87,Q9QX74               |
| 6317 | 1,7,8,33,3<br>4,35,36,38      | 2,3,4,5,6,3<br>7,39,40 | 5 iRT-Kit_WR_fusion,P08721,P30919,P82471,Q9QX74                  |
| 6318 | 1,7,8,33,3<br>4,35,36,39      | 2,3,4,5,6,3<br>7,38,40 | 3 P82471,Q4KLZ6,Q9QX74                                           |
| 6319 | 1,7,8,33,3<br>4,35,36,40      | 2,3,4,5,6,3<br>7,38,39 | 3 P13432,P30919,Q9QX74                                           |
| 6320 | 1,7,8,33,3<br>4,35,37,38      | 2,3,4,5,6,3<br>6,39,40 | 1 Q9QX74                                                         |
| 6321 | 1,7,8,33,3<br>4,35,37,39      | 2,3,4,5,6,3<br>6,38,40 | 5 P21674,Q4KLZ6,Q9QWN8,Q9QX74,Q9Z0V6                             |
| 6322 | 1,7,8,33,3<br>4,35,37,40      | 2,3,4,5,6,3<br>6,38,39 | 6 P13432,P21674,P24368,P30120,Q923V8,Q9QW07                      |
| 6323 | 1,7,8,33,3<br>4,35,38,39      | 2,3,4,5,6,3<br>6,37,40 | 4 P19132,P82471,Q9QX74,Q9Z0V6                                    |
| 6324 | 1,7,8,33,3<br>4,35,38,40      | 2,3,4,5,6,3<br>6,37,39 | 1 P09656                                                         |
| 6325 | 1,7,8,33,3<br>4,35,39,40      | 2,3,4,5,6,3<br>6,37,38 | 4 P09656,P21674,Q4KLZ6,Q9QX74                                    |

|      |                          |                        |    |                                                                                                                 |
|------|--------------------------|------------------------|----|-----------------------------------------------------------------------------------------------------------------|
| 6326 | 1,7,8,33,3<br>4,36,37,38 | 2,3,4,5,6,3<br>5,39,40 | 6  | P00774,P08723,P30919,Q63474,Q9JHB9,Q9QX74                                                                       |
| 6327 | 1,7,8,33,3<br>4,36,37,39 | 2,3,4,5,6,3<br>5,38,40 | 9  | P00774,P08723,P13432,P21674,P36374,Q64093,Q6P6R2,Q812E4,Q9QX74                                                  |
| 6328 | 1,7,8,33,3<br>4,36,37,40 | 2,3,4,5,6,3<br>5,38,39 | 16 | P02782,P08723,P09456,P13432,P21674,P24368,P30120,P30919,P36374,P47727,Q6AYR9,Q6P6R2,Q812E4,Q9JHB9,Q9QW07,Q9QX74 |
| 6329 | 1,7,8,33,3<br>4,36,38,39 | 2,3,4,5,6,3<br>5,37,40 | 4  | P19132,P82471,Q64093,Q9QX74                                                                                     |
| 6330 | 1,7,8,33,3<br>4,36,38,40 | 2,3,4,5,6,3<br>5,37,39 | 3  | iRT-Kit_WR_fusion,P30919,Q64093                                                                                 |
| 6331 | 1,7,8,33,3<br>4,36,39,40 | 2,3,4,5,6,3<br>5,37,38 | 6  | P13432,P21674,P30919,Q4TU93,Q64093,Q9QX74                                                                       |
| 6332 | 1,7,8,33,3<br>4,37,38,39 | 2,3,4,5,6,3<br>5,36,40 | 6  | P02793,Q7TP54,P17475,P19132,P21674,Q64093,Q9Z0V6                                                                |
| 6333 | 1,7,8,33,3<br>4,37,38,40 | 2,3,4,5,6,3<br>5,36,39 | 6  | P13432,P21674,P24368,P30120,Q62714,Q9QW07                                                                       |
| 6334 | 1,7,8,33,3<br>4,37,39,40 | 2,3,4,5,6,3<br>5,36,38 | 10 | P02782,P13432,P19218,P21674,P24368,P30120,Q812E4,Q923V8,Q9QW07,Q9QWN8                                           |
| 6335 | 1,7,8,33,3<br>4,38,39,40 | 2,3,4,5,6,3<br>5,36,37 | 5  | P09656,P17475,P19132,P21674,Q64093                                                                              |
| 6336 | 1,7,8,33,3<br>5,36,37,38 | 2,3,4,5,6,3<br>4,39,40 | 1  | P08723                                                                                                          |
| 6337 | 1,7,8,33,3<br>5,36,37,39 | 2,3,4,5,6,3<br>4,38,40 | 4  | P08723,P70549,Q4KLZ6,Q812E4                                                                                     |
| 6338 | 1,7,8,33,3<br>5,36,37,40 | 2,3,4,5,6,3<br>4,38,39 | 11 | O08815,P02782,P08723,P13432,P30120,P60905,P70549,Q4KLZ6,Q6AYR9,Q812E4,Q9QW07                                    |
| 6339 | 1,7,8,33,3<br>5,36,38,39 | 2,3,4,5,6,3<br>4,37,40 | 1  | Q4KLZ6                                                                                                          |
| 6340 | 1,7,8,33,3<br>5,36,38,40 | 2,3,4,5,6,3<br>4,37,39 | 2  | P30919,Q8K4G9                                                                                                   |
| 6341 | 1,7,8,33,3<br>5,36,39,40 | 2,3,4,5,6,3<br>4,37,38 | 1  | Q4KLZ6                                                                                                          |
| 6342 | 1,7,8,33,3<br>5,37,38,39 | 2,3,4,5,6,3<br>4,36,40 | 1  | Q4KLZ6                                                                                                          |
| 6343 | 1,7,8,33,3<br>5,37,38,40 | 2,3,4,5,6,3<br>4,36,39 | 1  | Q8K4G9                                                                                                          |
| 6344 | 1,7,8,33,3<br>5,37,39,40 | 2,3,4,5,6,3<br>4,36,38 | 4  | P21674,Q4KLZ6,Q812E4,Q9QWN8                                                                                     |
| 6345 | 1,7,8,33,3<br>5,38,39,40 | 2,3,4,5,6,3<br>4,36,37 | 6  | O55145,P55091,Q4KLZ6,Q5I0D7,Q8K4G9,Q9JJ50                                                                       |

|      |                          |                        |    |                                                                                                          |
|------|--------------------------|------------------------|----|----------------------------------------------------------------------------------------------------------|
| 6346 | 1,7,8,33,3<br>6,37,38,39 | 2,3,4,5,6,3<br>4,35,40 | 4  | P08723,Q63474,Q64093,Q812E4                                                                              |
| 6347 | 1,7,8,33,3<br>6,37,38,40 | 2,3,4,5,6,3<br>4,35,39 | 15 | O08815,P02782,P06911,P08723,P09456,P19629,P30120,P30919,P47727,P70549,Q4TU93,Q63474,Q812E4,Q8K4G9,Q9Z2L0 |
| 6348 | 1,7,8,33,3<br>6,37,39,40 | 2,3,4,5,6,3<br>4,35,38 | 14 | P02782,P08723,P13432,P19629,P21674,P30120,P36374,P70549,Q4KLZ6,Q4TU93,Q6AYR9,Q812E4,Q9QWN8,Q9WUC4        |
| 6349 | 1,7,8,33,3<br>6,38,39,40 | 2,3,4,5,6,3<br>4,35,37 | 3  | Q4TU93,Q5I0D7,Q64093                                                                                     |
| 6350 | 1,7,8,33,3<br>7,38,39,40 | 2,3,4,5,6,3<br>4,35,36 | 9  | P17475,P21674,P30120,Q4TU93,Q5I0D7,Q64093,Q812E4,Q8K4G9,Q9QWN8                                           |
| 6351 | 1,7,8,34,3<br>5,36,37,38 | 2,3,4,5,6,3<br>3,39,40 | 2  | P01039,P35745                                                                                            |
| 6352 | 1,7,8,34,3<br>5,36,37,39 | 2,3,4,5,6,3<br>3,38,40 | 4  | P01039,P35745,Q6P6R2,Q812E4                                                                              |
| 6353 | 1,7,8,34,3<br>5,36,37,40 | 2,3,4,5,6,3<br>3,38,39 | 7  | P13432,P30120,P35745,P60905,P70549,Q812E4,Q9QW07                                                         |
| 6354 | 1,7,8,34,3<br>5,36,38,39 | 2,3,4,5,6,3<br>3,37,40 | 1  | P35745                                                                                                   |
| 6355 | 1,7,8,34,3<br>5,36,38,40 | 2,3,4,5,6,3<br>3,37,39 | 2  | D3ZTX0,P35745                                                                                            |
| 6356 | 1,7,8,34,3<br>5,36,39,40 | 2,3,4,5,6,3<br>3,37,38 | 1  | P35745                                                                                                   |
| 6357 | 1,7,8,34,3<br>5,37,38,39 | 2,3,4,5,6,3<br>3,36,40 | 4  | P35745,P42854,P52590,Q9Z0V6                                                                              |
| 6358 | 1,7,8,34,3<br>5,37,38,40 | 2,3,4,5,6,3<br>3,36,39 | 2  | P35745,Q99MH3                                                                                            |
| 6359 | 1,7,8,34,3<br>5,37,39,40 | 2,3,4,5,6,3<br>3,36,38 | 4  | P13432,P21674,P35745,Q923V8                                                                              |
| 6360 | 1,7,8,34,3<br>5,38,39,40 | 2,3,4,5,6,3<br>3,36,37 | 6  | D3ZTX0,P09656,P11883,P15399,P35745,Q5I0D7                                                                |
| 6361 | 1,7,8,34,3<br>6,37,38,39 | 2,3,4,5,6,3<br>3,35,40 | 6  | P35745,P42854,Q63474,Q64093,Q6AY41,Q812E4                                                                |
| 6362 | 1,7,8,34,3<br>6,37,38,40 | 2,3,4,5,6,3<br>3,35,39 | 12 | P09456,P13432,P19629,P30120,P30919,P35745,P47727,P49134,Q63474,Q811M5,Q812E4,Q9Z2L0                      |
| 6363 | 1,7,8,34,3<br>6,37,39,40 | 2,3,4,5,6,3<br>3,35,38 | 10 | P02782,P13432,P19629,P21674,P30120,P35745,P49134,Q6AYR9,Q812E4,Q9Z2L0                                    |
| 6364 | 1,7,8,34,3<br>6,38,39,40 | 2,3,4,5,6,3<br>3,35,37 | 4  | D3ZTX0,P35745,Q5I0D7,Q64093                                                                              |
| 6365 | 1,7,8,34,3<br>7,38,39,40 | 2,3,4,5,6,3<br>3,35,36 | 7  | P17475,P21674,P35745,P42854,P49134,Q5I0D7,Q64093                                                         |

|      |                               |                        |    |                                                                                                   |
|------|-------------------------------|------------------------|----|---------------------------------------------------------------------------------------------------|
| 6366 | 1,7,8,35,3<br>6,37,38,39      | 2,3,4,5,6,3<br>3,34,40 | 5  | P01039,P35745,P42854,Q63474,Q9Z2L0                                                                |
| 6367 | 1,7,8,35,3<br>6,37,38,40      | 2,3,4,5,6,3<br>3,34,39 | 7  | P35745,P60905,P70549,Q63474,Q99MH3,Q9WUC4,Q9Z2L0                                                  |
| 6368 | 1,7,8,35,3<br>6,37,39,40      | 2,3,4,5,6,3<br>3,34,38 | 12 | P02782,P19629,P35745,P60905,P70549,P80299,P97829,Q4KLZ6,Q6AYR9,Q812E4,Q9WUC4,Q9Z2L0               |
| 6369 | 1,7,8,35,3<br>6,38,39,40      | 2,3,4,5,6,3<br>3,34,37 | 4  | D3ZTX0,O55145,P35745,Q5I0D7                                                                       |
| 6370 | 1,7,8,35,3<br>7,38,39,40      | 2,3,4,5,6,3<br>3,34,36 | 14 | O55145,P08649,P26772,P35745,P42854,P97584,Q5I0D7,Q6AYC4,Q91XN4,Q99MH3,Q99PP0,Q9QZQ5,Q9WUC4,Q9Z2L0 |
| 6371 | 1,7,8,36,3<br>7,38,39,40      | 2,3,4,5,6,3<br>3,34,35 | 12 | P06911,P19629,P35745,P42854,P70549,Q5GRG2,Q5I0D7,Q63474,Q6AYR9,Q812E4,Q9WUC4,Q9Z2L0               |
| 6372 | 1,7,33,34,<br>35,36,37,3<br>8 | 2,3,4,5,6,8<br>,39,40  | 9  | P08723,P20762,P23593,P25031,P36374,P36376,P54921,P82471,Q9R168                                    |
| 6373 | 1,7,33,34,<br>35,36,37,3<br>9 | 2,3,4,5,6,8<br>,38,40  | 5  | P25031,P36374,P36376,P70549,Q6PCU2                                                                |
| 6374 | 1,7,33,34,<br>35,36,37,4<br>0 | 2,3,4,5,6,8<br>,38,39  | 9  | P08723,P20762,P24368,P30919,P36374,P36376,P70549,Q6PCU2,Q9R168                                    |
| 6375 | 1,7,33,34,<br>35,36,38,3<br>9 | 2,3,4,5,6,8<br>,37,40  | 2  | P36376,P82471                                                                                     |
| 6376 | 1,7,33,34,<br>35,36,38,4<br>0 | 2,3,4,5,6,8<br>,37,39  | 6  | P20762,P23593,P30919,P36376,P63029,Q9R168                                                         |
| 6377 | 1,7,33,34,<br>35,36,39,4<br>0 | 2,3,4,5,6,8<br>,37,38  | 1  | P19218                                                                                            |
| 6378 | 1,7,33,34,<br>35,37,38,3<br>9 | 2,3,4,5,6,8<br>,36,40  | 5  | P36376,P42854,P82471,Q91XN4,Q9QZQ5                                                                |
| 6379 | 1,7,33,34,<br>35,37,38,4<br>0 | 2,3,4,5,6,8<br>,36,39  | 5  | P20762,P36376,Q8K4G9,Q9QZQ5,Q9R168                                                                |
| 6380 | 1,7,33,34,<br>35,37,39,4<br>0 | 2,3,4,5,6,8<br>,36,38  | 5  | P19218,P21674,P36376,Q91XN4,Q9QZQ5                                                                |



|      |                               |                       |    |                                                                                            |
|------|-------------------------------|-----------------------|----|--------------------------------------------------------------------------------------------|
| 6381 | 1,7,33,34,<br>35,38,39,4<br>0 | 2,3,4,5,6,8<br>,36,37 | 4  | P09656,P55091,Q05702,Q9QZQ5                                                                |
| 6382 | 1,7,33,34,<br>36,37,38,3<br>9 | 2,3,4,5,6,8<br>,35,40 | 9  | P00774,P36374,P36376,P42854,P82471,P85971,Q63149,Q63474,Q64093                             |
| 6383 | 1,7,33,34,<br>36,37,38,4<br>0 | 2,3,4,5,6,8<br>,35,39 | 12 | P08723,P20762,P23593,P24368,P30919,P36374,P36376,P36860,P85971,Q63149,Q63474,Q9R168        |
| 6384 | 1,7,33,34,<br>36,37,39,4<br>0 | 2,3,4,5,6,8<br>,35,38 | 11 | P19218,P19629,P21674,P24368,P36374,P36376,P70549,Q63149,Q64093,Q6DGG1,Q812E4               |
| 6385 | 1,7,33,34,<br>36,38,39,4<br>0 | 2,3,4,5,6,8<br>,35,37 | 9  | P19132,P19218,P23593,P30919,P36376,P36860,P82471,Q64093,Q6DGG1                             |
| 6386 | 1,7,33,34,<br>37,38,39,4<br>0 | 2,3,4,5,6,8<br>,35,36 | 11 | P17475,P19218,P21674,P36374,P36376,P42854,P48199,P85971,Q5I0D7,Q64093,Q9QZQ5               |
| 6387 | 1,7,33,35,<br>36,37,38,3<br>9 | 2,3,4,5,6,8<br>,34,40 | 6  | P36374,P36376,P42854,P70549,Q05702,Q91XN4                                                  |
| 6388 | 1,7,33,35,<br>36,37,38,4<br>0 | 2,3,4,5,6,8<br>,34,39 | 8  | P20762,P36374,P36376,P42854,P70549,Q05702,Q8K4G9,Q9R168                                    |
| 6389 | 1,7,33,35,<br>36,37,39,4<br>0 | 2,3,4,5,6,8<br>,34,38 | 11 | O35276,P20762,P36374,P36376,P42854,P60905,P70549,Q05702,Q4KLZ6,Q91XN4,Q9WUC4               |
| 6390 | 1,7,33,35,<br>36,38,39,4<br>0 | 2,3,4,5,6,8<br>,34,37 | 3  | Q05702,Q8K4G9,Q9JJ50                                                                       |
| 6391 | 1,7,33,35,<br>37,38,39,4<br>0 | 2,3,4,5,6,8<br>,34,36 | 11 | P08649,P42854,P48199,P97615,Q05702,Q5I0D7,Q6AYC4,Q8K4G9,Q91XN4,Q99PP0,Q9QZQ5               |
| 6392 | 1,7,33,36,<br>37,38,39,4<br>0 | 2,3,4,5,6,8<br>,34,35 | 13 | P19629,P20762,P36374,P36376,P36860,P42854,P48199,P70549,Q5I0D7,Q63474,Q64093,Q8K4G9,Q9WUC4 |
| 6393 | 1,7,34,35,<br>36,37,38,3<br>9 | 2,3,4,5,6,8<br>,33,40 | 11 | O54858,P17559,P25031,P35745,P36376,P42854,P80202,Q05702,Q91XN4,Q99PP0,Q9QZQ5               |

|      |                               |                       |    |                                                                                                                                             |
|------|-------------------------------|-----------------------|----|---------------------------------------------------------------------------------------------------------------------------------------------|
| 6394 | 1,7,34,35,<br>36,37,38,4<br>0 | 2,3,4,5,6,8<br>,33,39 | 12 | D3ZTE0,P00758,P20762,P23593,P35745,P36376,P42854,P80202,Q05702,Q99PP0,Q9QZQ5,Q9R168                                                         |
| 6395 | 1,7,34,35,<br>36,37,39,4<br>0 | 2,3,4,5,6,8<br>,33,38 | 9  | P17559,P35745,P36376,P42854,P70549,Q05702,Q91XN4,Q99PP0,Q9QZQ5                                                                              |
| 6396 | 1,7,34,35,<br>36,38,39,4<br>0 | 2,3,4,5,6,8<br>,33,37 | 8  | D3ZTX0,P17559,P35745,P42854,Q05702,Q91XN4,Q99PP0,Q9QZQ5                                                                                     |
| 6397 | 1,7,34,35,<br>37,38,39,4<br>0 | 2,3,4,5,6,8<br>,33,36 | 12 | P08649,P16636,P17559,P35745,P42854,Q05702,Q09030,Q5I0D7,Q91XN4,Q99MH3,Q99PP0,Q9QZQ5                                                         |
| 6398 | 1,7,34,36,<br>37,38,39,4<br>0 | 2,3,4,5,6,8<br>,33,35 | 17 | O54858,P17559,P19629,P35745,P36376,P42854,P85971,Q09030,Q4AEF8,Q5I0D7,Q5PPH0,Q63149,Q63474,Q64093,Q91XN4,Q99PP0,Q9QZQ5                      |
| 6399 | 1,7,35,36,<br>37,38,39,4<br>0 | 2,3,4,5,6,8<br>,33,34 | 20 | O54858,P08649,P17559,P19629,P35745,P42854,P70549,P80202,Q05702,Q5I0D7,Q63475,Q64240,Q6AYC4,Q91XN4,Q99MH3,Q99PP0,Q9QW30,Q9QZQ5,Q9WUC4,Q9Z2L0 |
| 6400 | 1,8,33,34,<br>35,36,37,3<br>8 | 2,3,4,5,6,7<br>,39,40 | 4  | P08723,P36374,Q4AEF8,Q63474                                                                                                                 |
| 6401 | 1,8,33,34,<br>35,36,37,3<br>9 | 2,3,4,5,6,7<br>,38,40 | 8  | P08723,P13432,P36374,P50116,P70549,Q6P6R2,Q9QWN8,Q9QX74                                                                                     |
| 6402 | 1,8,33,34,<br>35,36,37,4<br>0 | 2,3,4,5,6,7<br>,38,39 | 10 | P08723,P13432,P24368,P30120,P36374,P50116,P60905,P70549,Q4AEF8,Q5QE79                                                                       |
| 6403 | 1,8,33,34,<br>35,36,38,3<br>9 | 2,3,4,5,6,7<br>,37,40 | 2  | P19132,Q4AEF8                                                                                                                               |
| 6404 | 1,8,33,34,<br>35,36,38,4<br>0 | 2,3,4,5,6,7<br>,37,39 | 2  | P63029,Q4AEF8                                                                                                                               |
| 6405 | 1,8,33,34,<br>35,36,39,4<br>0 | 2,3,4,5,6,7<br>,37,38 | 4  | P13432,P50116,Q4AEF8,Q6AY61                                                                                                                 |
| 6406 | 1,8,33,34,<br>35,37,38,3<br>9 | 2,3,4,5,6,7<br>,36,40 | 3  | P42854,Q91XN4,Q9QWN8                                                                                                                        |

|      |                               |                       |    |                                                                                                                                          |
|------|-------------------------------|-----------------------|----|------------------------------------------------------------------------------------------------------------------------------------------|
| 6407 | 1,8,33,34,<br>35,37,38,4<br>0 | 2,3,4,5,6,7<br>,36,39 | 7  | B0BNN3,P13432,P15399,P63029,Q4AEF8,Q8K4G9,Q9QWN8                                                                                         |
| 6408 | 1,8,33,34,<br>35,37,39,4<br>0 | 2,3,4,5,6,7<br>,36,38 | 8  | P13432,P19218,P21674,P24368,P36374,P50116,Q923V8,Q9QWN8                                                                                  |
| 6409 | 1,8,33,34,<br>35,38,39,4<br>0 | 2,3,4,5,6,7<br>,36,37 | 9  | P09656,P15399,P19132,P47967,P55091,P97840,Q4AEF8,Q5I0D1,Q9JJ50                                                                           |
| 6410 | 1,8,33,34,<br>36,37,38,3<br>9 | 2,3,4,5,6,7<br>,35,40 | 9  | P02793;Q7TP54,P08723,P19132,P36374,Q4AEF8,Q63149,Q63474,Q64093,Q9QWN8                                                                    |
| 6411 | 1,8,33,34,<br>36,37,38,4<br>0 | 2,3,4,5,6,7<br>,35,39 | 10 | P08723,P13432,P19629,P24368,P30120,P36374,P47727,Q4AEF8,Q63149,Q63474                                                                    |
| 6412 | 1,8,33,34,<br>36,37,39,4<br>0 | 2,3,4,5,6,7<br>,35,38 | 19 | P02782,P08723,P13432,P19218,P19629,P21674,P24368,P30120,P36374,P47727,P50116,P70549<br>,Q4AEF8,Q4TU93,Q63149,Q63474,Q6AYR9,Q812E4,Q9QWN8 |
| 6413 | 1,8,33,34,<br>36,38,39,4<br>0 | 2,3,4,5,6,7<br>,35,37 | 5  | P15399,P19132,Q4AEF8,Q63474,Q64093                                                                                                       |
| 6414 | 1,8,33,34,<br>37,38,39,4<br>0 | 2,3,4,5,6,7<br>,35,36 | 12 | P13432,P15399,P19132,P19218,P21674,P36374,P47967,P97840,Q4AEF8,Q5I0D7,Q63474,Q9Q<br>WN8                                                  |
| 6415 | 1,8,33,35,<br>36,37,38,3<br>9 | 2,3,4,5,6,7<br>,34,40 | 8  | P20766,P36374,P42854,P70549,Q63474,Q68G31,Q80WL1,Q91XN4                                                                                  |
| 6416 | 1,8,33,35,<br>36,37,38,4<br>0 | 2,3,4,5,6,7<br>,34,39 | 10 | P08723,P20762,P20766,P36374,P60905,P70549,Q4AEF8,Q63474,Q68G31,Q8K4G9                                                                    |
| 6417 | 1,8,33,35,<br>36,37,39,4<br>0 | 2,3,4,5,6,7<br>,34,38 | 12 | P13432,P36374,P50116,P60905,P70549,P80299,Q4KLZ6,Q6AYR9,Q80WL1,Q812E4,Q8K4G9,Q9<br>QWN8                                                  |
| 6418 | 1,8,33,35,<br>36,38,39,4<br>0 | 2,3,4,5,6,7<br>,34,37 | 6  | Q4AEF8,Q5I0D7,Q6AY61,Q80WL1,Q8K4G9,Q9JJ50                                                                                                |
| 6419 | 1,8,33,35,<br>37,38,39,4<br>0 | 2,3,4,5,6,7<br>,34,36 | 10 | P42854,P47967,P48199,Q5I0D7,Q68G31,Q80WL1,Q8K4G9,Q91XN4,Q99PP0,Q9QWN8                                                                    |

|      |                                |                       |    |                                                                                                                                                                      |
|------|--------------------------------|-----------------------|----|----------------------------------------------------------------------------------------------------------------------------------------------------------------------|
| 6420 | 1,8,33,36,<br>37,38,39,4<br>0  | 2,3,4,5,6,7<br>,34,35 | 14 | P19629,P30120,P36374,P42854,P48199,P70549,Q4AEF8,Q4TU93,Q5I0D7,Q63474,Q80WL1,Q812E4,Q8K4G9,Q9QWN8                                                                    |
| 6421 | 1,8,34,35,<br>36,37,38,3<br>9  | 2,3,4,5,6,7<br>,33,40 | 7  | P01039,P35745,P42854,Q4AEF8,Q63474,Q91XN4,Q99PP0                                                                                                                     |
| 6422 | 1,8,34,35,<br>36,37,38,4<br>0  | 2,3,4,5,6,7<br>,33,39 | 12 | D3ZTE0,D3ZTX0,P00758,P13432,P35745,P42854,P60905,P70549,Q4AEF8,Q5RKI1,Q63474,Q99P<br>P0                                                                              |
| 6423 | 1,8,34,35,<br>36,37,39,4<br>0  | 2,3,4,5,6,7<br>,33,38 | 13 | P13432,P19629,P35745,P42854,P50115,P50116,P60905,P70549,Q4AEF8,Q812E4,Q91XN4,Q923<br>V8,Q99PP0                                                                       |
| 6424 | 1,8,34,35,<br>36,38,39,4<br>0  | 2,3,4,5,6,7<br>,33,37 | 5  | D3ZTX0,P15399,P35745,Q4AEF8,Q99PP0                                                                                                                                   |
| 6425 | 1,8,34,35,<br>37,38,39,4<br>0  | 2,3,4,5,6,7<br>,33,36 | 13 | D3ZTX0,P15399,P16636,P35745,P42854,P47967,Q09030,Q4AEF8,Q5I0D7,Q91XN4,Q923V8,Q9<br>9PP0,Q9QZQ5                                                                       |
| 6426 | 1,8,34,36,<br>37,38,39,4<br>0  | 2,3,4,5,6,7<br>,33,35 | 11 | P13432,P15399,P19629,P35745,P42854,Q4AEF8,Q5I0D7,Q63149,Q63474,Q812E4,Q99PP0                                                                                         |
| 6427 | 1,8,35,36,<br>37,38,39,4<br>0  | 2,3,4,5,6,7<br>,33,34 | 16 | P16636,P19629,P35745,P42854,P60905,P70549,P80299,Q4AEF8,Q5I0D7,Q63474,Q812E4,Q91X<br>N4,Q99PP0,Q9QW30,Q9QZQ5,Q9Z2L0                                                  |
| 6428 | 1,33,34,35<br>,36,37,38,<br>39 | 2,3,4,5,6,7<br>,8,40  | 19 | B5DFC9,O35276,O35568,O54858,P02454,P22273,P23593,P36374,P36376,P42854,P70549,P802<br>02,P85971,Q05702,Q4AEF8,Q8CG08,Q91XN4,Q99PP0,Q9QZQ5                             |
| 6429 | 1,33,34,35<br>,36,37,38,<br>40 | 2,3,4,5,6,7<br>,8,39  | 22 | B5DFC9,D3ZTE0,O35568,O54858,P00758,P20762,P20766,P22273,P23593,P36374,P36376,P428<br>54,P63029,P70549,P85971,Q4AEF8,Q63474,Q8K4G9,Q91XN4,Q99PP0,Q9QZQ5,Q9R168        |
| 6430 | 1,33,34,35<br>,36,37,39,<br>40 | 2,3,4,5,6,7<br>,8,38  | 22 | B5DFC9,O35276,O35568,O54858,O70417,O88339,Q4V882,P17559,P19218,P22273,P26453,P35<br>280,P36374,P36376,P42854,P50115,P50116,P60905,P70549,P85971,Q4AEF8,Q91XN4,Q99PP0 |
| 6431 | 1,33,34,35<br>,36,38,39,<br>40 | 2,3,4,5,6,7<br>,8,37  | 15 | B5DFC9,O35568,O54858,P19218,P22273,P23593,P63029,P85971,Q05702,Q4AEF8,Q8K4G9,Q91<br>XN4,Q99PP0,Q9JJ50,Q9QZQ5                                                         |
| 6432 | 1,33,34,35<br>,37,38,39,<br>40 | 2,3,4,5,6,7<br>,8,36  | 18 | B5DFC9,O35276,O35568,O54858,P02454,P19218,P36374,P42854,P47967,P48199,P85971,Q057<br>02,Q4AEF8,Q8CG08,Q8K4G9,Q91XN4,Q99PP0,Q9QZQ5                                    |

1,33,34,36  
6433 ,37,38,39, 2,3,4,5,6,7  
40 ,8,35  
1,33,35,36  
6434 ,37,38,39, 2,3,4,5,6,7  
40 ,8,34  
1,34,35,36  
6435 ,37,38,39, 2,3,4,5,6,7  
40 ,8,33

B5DFC9,O35276,O35568,O54858,P02454,P17559,P19218,P19629,P22273,P23593,P26453,P363  
27 74,P36376,P36860,P42854,P48199,P70549,P85971,Q4AEF8,Q63149,Q63474,Q6DGG1,Q8CG08,  
Q8K4G9,Q91XN4,Q99PP0,Q9QZQ5  
B5DFC9,O35276,O35568,O54858,P02454,P17559,P19629,P20762,P20766,P26453,P36374,P428  
29 54,P48199,P60905,P70549,P80202,P85971,Q05702,Q4AEF8,Q5I0D7,Q63474,Q68G31,Q6AYC4,  
Q8CG08,Q8K4G9,Q91XN4,Q99PP0,Q9QW30,Q9QZQ5  
B5DFC9,D3ZTX0,O35276,O35568,O54858,P00758,P02454,P02631,P07897,P13852,P16636,P175  
34 59,P19629,P22273,P23593,P26453,P35745,P36374,P42854,P50115,P70549,P80202,P85971,Q05  
702,Q09030,Q4AEF8,Q5I0D7,Q63474,Q63475,Q8CG08,Q91XN4,Q99PP0,Q9QW30,Q9QZQ5

---
